# Supplementary material for: Genomic analyses of gynaecologic carcinosarcomas reveal frequent mutations in chromatin remodelling genes
Source: PubMed Central journal article supplement (PMC4354107; doi:10.1038/ncomms6006), 2014-09-19
Supplement: ncomms6006-s1.pdf [file ncomms6006-s1.pdf]

**Supplementary Table 1. Characteristics of Carcinosarcoma Samples**

| Sample | Age at Tumor Resection | Adjuvant Therapy           | Location | FIGO stage | Sample Type | Pathologic Tumor Cellularity |
|--------|------------------------|----------------------------|----------|------------|-------------|------------------------------|
| MM01T  | 77                     | Chemotherapy, Radiotherapy | Uterus   | IIIA       | Frozen      | 90%                          |
| MM02T  | 59                     | Chemotherapy               | Uterus   | IA         | Frozen      | 90%                          |
| MM03T  | 51                     | None                       | Uterus   | NA         | FFPE        | 70%                          |
| MM04T  | 54                     | None                       | Uterus   | I          | FFPE        | 90%                          |
| MM05T  | 61                     | Chemotherapy               | Ovary    | IIC        | FFPE        | 80%                          |
| MM06T  | 73                     | None                       | Ovary    | IV         | Frozen      | 90%                          |
| MM07T  | 61                     | None                       | Uterus   | NA         | FFPE        | 80%                          |
| MM08T  | 74                     | None                       | Uterus   | IB         | FFPE        | 90%                          |
| MM09T  | 64                     | Radiotherapy, Chemotherapy | Uterus   | III        | FFPE        | 80%                          |
| MM10T  | 84                     | None                       | Ovary    | IIIC       | Frozen      | 90%                          |
| MM11T  | 64                     | Chemotherapy               | Ovary    | IIIA       | FFPE        | 80%                          |
| MM12T  | 55                     | None                       | Uterus   | IB         | FFPE        | 90%                          |
| MM13T  | 72                     | Chemotherapy               | Uterus   | NA         | FFPE        | 70%                          |
| MM14T  | 82                     | Chemotherapy, Radiotherapy | Uterus   | IIIA       | Frozen      | 90%                          |
| MM15T  | 63                     | None                       | Uterus   | NA         | FFPE        | 90%                          |
| MM16T  | 78                     | None                       | Uterus   | IIIA       | Frozen      | 90%                          |
| MM17T  | 71                     | None                       | Uterus   | IIIA       | Frozen      | 90%                          |
| MM18T  | 59                     | Radiation                  | Uterus   | IB         | FFPE        | 80%                          |
| MM19T  | 68                     | None                       | Uterus   | II         | Frozen      | 90%                          |
| MM20T  | 44                     | Radiotherapy               | Uterus   | IB         | FFPE        | 80%                          |
| MM21T  | 67                     | Chemotherapy, Radiotherapy | Uterus   | IB         | Frozen      | 90%                          |
| MM22T  | 52                     | Chemotherapy               | Ovary    | IIC        | Frozen      | 80%                          |

**Supplementary Table 2. Next Generation Sequencing Characteristics**

| Sample  | Bases Sequenced | Total Mapped Sequence | Bases Mapped to Target Region | Fraction Mapped to Genome | Fraction Mapped to Target Region | Bases in Target Region With at Least 10 Reads | Fraction of Bases in Target Region With at Least 10 Reads | Total Coverage | Distinct Coverage |
|---------|-----------------|-----------------------|-------------------------------|---------------------------|----------------------------------|-----------------------------------------------|-----------------------------------------------------------|----------------|-------------------|
| MM01N   | 18,963,020,600  | 18,512,527,600        | 10,523,589,955                | 98%                       | 57%                              | 50,619,551                                    | 93%                                                       | 189            | 129               |
| MM01T   | 19,930,139,800  | 19,447,484,900        | 10,930,949,235                | 98%                       | 56%                              | 50,495,339                                    | 93%                                                       | 184            | 106               |
| MM02N   | 21,885,274,400  | 17,802,347,700        | 12,238,609,058                | 81%                       | 69%                              | 44,312,201                                    | 88%                                                       | 230            | 127               |
| MM02T   | 21,229,167,800  | 20,566,897,300        | 10,627,258,690                | 97%                       | 52%                              | 47,154,663                                    | 94%                                                       | 190            | 156               |
| MM03N   | 28,905,196,800  | 17,106,059,900        | 10,948,811,522                | 59%                       | 64%                              | 44,173,728                                    | 88%                                                       | 206            | 70                |
| MM03T   | 26,784,186,200  | 20,983,794,400        | 12,292,403,133                | 78%                       | 59%                              | 44,988,578                                    | 89%                                                       | 211            | 140               |
| MM04N   | 26,806,049,800  | 24,222,314,400        | 15,669,280,376                | 90%                       | 65%                              | 46,594,141                                    | 93%                                                       | 296            | 220               |
| MM04T   | 23,457,085,000  | 20,729,184,400        | 12,087,655,885                | 88%                       | 58%                              | 46,591,021                                    | 93%                                                       | 209            | 149               |
| MM05N   | 20,765,792,000  | 12,802,342,300        | 8,445,580,548                 | 62%                       | 66%                              | 42,646,634                                    | 85%                                                       | 159            | 70                |
| MM05T   | 26,451,974,200  | 21,509,600,800        | 13,290,987,017                | 81%                       | 62%                              | 44,240,216                                    | 88%                                                       | 232            | 167               |
| MM06N   | 19,486,676,200  | 8,368,260,600         | 4,871,252,453                 | 43%                       | 58%                              | 39,999,038                                    | 79%                                                       | 91             | 17                |
| MM06T   | 23,555,339,000  | 22,745,397,800        | 11,555,196,242                | 97%                       | 51%                              | 47,289,317                                    | 94%                                                       | 205            | 151               |
| MM07N   | 28,301,494,600  | 25,296,439,200        | 16,754,453,616                | 89%                       | 66%                              | 45,825,841                                    | 91%                                                       | 315            | 244               |
| MM07T   | 21,247,754,600  | 17,573,976,900        | 10,024,976,660                | 83%                       | 57%                              | 45,351,325                                    | 90%                                                       | 176            | 138               |
| MM08N   | 22,292,326,200  | 17,660,857,700        | 10,540,875,095                | 79%                       | 60%                              | 45,890,962                                    | 91%                                                       | 195            | 123               |
| MM08T   | 19,375,998,800  | 17,061,089,000        | 10,655,290,261                | 88%                       | 62%                              | 44,425,965                                    | 88%                                                       | 177            | 139               |
| MM09N   | 24,060,137,200  | 16,635,886,600        | 10,605,738,156                | 69%                       | 64%                              | 44,799,268                                    | 89%                                                       | 200            | 128               |
| MM09T   | 24,840,360,400  | 19,706,053,100        | 11,442,733,247                | 79%                       | 58%                              | 45,992,776                                    | 91%                                                       | 202            | 144               |
| MM10N   | 19,253,050,000  | 15,963,620,700        | 10,016,985,016                | 83%                       | 63%                              | 45,751,357                                    | 91%                                                       | 189            | 125               |
| MM10T   | 22,798,679,200  | 22,137,597,100        | 12,276,948,025                | 97%                       | 55%                              | 47,066,802                                    | 93%                                                       | 219            | 146               |
| MM11N   | 17,962,640,000  | 10,843,056,600        | 5,319,327,729                 | 60%                       | 49%                              | 43,180,784                                    | 86%                                                       | 100            | 48                |
| MM11T   | 28,468,947,000  | 18,088,714,700        | 9,465,616,801                 | 64%                       | 52%                              | 44,746,574                                    | 89%                                                       | 167            | 59                |
| MM12N   | 20,513,173,600  | 16,848,910,900        | 10,684,330,348                | 82%                       | 63%                              | 45,742,419                                    | 91%                                                       | 204            | 133               |
| MM12T   | 25,842,099,800  | 18,701,227,700        | 10,218,870,862                | 72%                       | 55%                              | 45,495,034                                    | 90%                                                       | 185            | 129               |
| MM13N   | 24,738,919,200  | 22,226,166,700        | 12,960,565,501                | 90%                       | 58%                              | 46,953,216                                    | 93%                                                       | 245            | 197               |
| MM13T   | 26,006,196,400  | 23,595,032,100        | 13,717,824,514                | 91%                       | 58%                              | 46,664,167                                    | 93%                                                       | 241            | 207               |
| MM14N   | 21,970,130,400  | 18,620,519,900        | 11,915,475,990                | 85%                       | 64%                              | 45,539,628                                    | 90%                                                       | 226            | 179               |
| MM14T   | 18,422,571,600  | 17,892,149,700        | 9,673,788,714                 | 97%                       | 54%                              | 46,952,098                                    | 93%                                                       | 174            | 134               |
| MM15N   | 26,627,632,600  | 21,846,937,500        | 12,453,164,759                | 82%                       | 57%                              | 46,233,420                                    | 92%                                                       | 231            | 146               |
| MM15T   | 20,260,560,000  | 16,341,573,800        | 8,298,190,745                 | 81%                       | 51%                              | 45,650,117                                    | 91%                                                       | 144            | 90                |
| MM16N   | 23,780,700,200  | 20,506,918,700        | 11,466,432,597                | 86%                       | 56%                              | 46,665,731                                    | 93%                                                       | 215            | 151               |
| MM16T   | 21,073,283,000  | 20,335,183,900        | 10,577,443,581                | 97%                       | 52%                              | 47,194,346                                    | 94%                                                       | 183            | 152               |
| MM17N   | 19,665,231,600  | 16,332,505,900        | 9,725,070,637                 | 83%                       | 60%                              | 46,467,713                                    | 92%                                                       | 184            | 136               |
| MM17T   | 18,626,301,200  | 18,012,471,600        | 10,349,944,706                | 97%                       | 57%                              | 47,070,269                                    | 93%                                                       | 180            | 129               |
| MM18N   | 15,990,332,400  | 12,298,589,200        | 7,430,514,454                 | 77%                       | 60%                              | 44,364,518                                    | 88%                                                       | 137            | 99                |
| MM18T   | 23,319,124,000  | 19,316,878,000        | 10,773,762,574                | 83%                       | 56%                              | 46,458,333                                    | 92%                                                       | 182            | 134               |
| MM19N   | 17,196,817,400  | 15,616,007,100        | 10,071,602,742                | 91%                       | 65%                              | 46,329,443                                    | 92%                                                       | 191            | 139               |
| MM19T   | 20,820,409,400  | 20,181,646,000        | 11,461,608,405                | 97%                       | 57%                              | 47,100,222                                    | 94%                                                       | 198            | 159               |
| MM20N   | 19,456,850,400  | 17,657,571,400        | 10,587,349,538                | 91%                       | 60%                              | 46,728,155                                    | 93%                                                       | 200            | 164               |
| MM20T   | 15,066,865,000  | 13,053,723,900        | 7,356,653,982                 | 87%                       | 56%                              | 46,038,256                                    | 91%                                                       | 131            | 100               |
| MM21N   | 13,953,834,000  | 12,362,940,000        | 7,712,602,110                 | 89%                       | 62%                              | 45,783,752                                    | 91%                                                       | 148            | 113               |
| MM21T   | 16,380,023,200  | 15,815,949,400        | 7,735,258,855                 | 97%                       | 49%                              | 47,147,870                                    | 94%                                                       | 137            | 116               |
| MM22N   | 17,297,028,200  | 14,564,990,800        | 8,396,701,934                 | 84%                       | 58%                              | 46,268,902                                    | 92%                                                       | 158            | 118               |
| MM22T   | 19,222,775,400  | 18,421,881,200        | 8,913,252,407                 | 96%                       | 48%                              | 47,227,248                                    | 94%                                                       | 152            | 106               |
| Average | 21,660,276,109  | 18,098,029,070        | 10,524,202,924                | 84%                       | 58%                              | 45,959,340                                    | 91%                                                       | 191            | 132               |

**Supplementary Table 3. Somatic Mutations Identified in the Carcinosarcoma Samples**

| Sample | Gene Symbol | Gene Description                                     | Transcript Accession | Nucleotide Position (genomic) hg19 | Amino Acid (protein) | Mutation Type | Consequence          | % Mutant Tags |
|--------|-------------|------------------------------------------------------|----------------------|------------------------------------|----------------------|---------------|----------------------|---------------|
| MM01T  | ABLIM3      | actin binding LIM protein family, member 3           | CCDS4294.1           | chr5_148626050-148626050_C_T       | 498R>X               | Substitution  | Nonsense             | 62%           |
| MM01T  | AMOTL2      | angiominin like 2                                    | CCDS33860.1          | chr3_134079032-134079032_C_T       | 600R>Q               | Substitution  | Nonsynonymous coding | 37%           |
| MM01T  | ARAF        | v-raf murine sarcoma 3611 viral oncogene homolog     | CCDS35232.1          | chrX_47428124-47428124_C_T         | 362R>X               | Substitution  | Nonsense             | 25%           |
| MM01T  | ASTN1       | astrotactin 1                                        | ENST00000281881      | chr1_176992533-176992533_C_T       | 482R>Q               | Substitution  | Nonsynonymous coding | 24%           |
| MM01T  | BASP1       | brain abundant, membrane attached signal protein 1   | CCDS3888.1           | chr5_17275414-17275414_C_T         | 30A>V                | Substitution  | Nonsynonymous coding | 16%           |
| MM01T  | C12orf44    | chromosome 12 open reading frame 44                  | CCDS8820.1           | chr12_52470865-52470865_G_A        | 183R>Q               | Substitution  | Nonsynonymous coding | 33%           |
| MM01T  | CA13        | carbonic anhydrase XIII                              | CCDS6236.1           | chr8_86171674-86171674_G_A         | 87G>E                | Substitution  | Nonsynonymous coding | 54%           |
| MM01T  | CACNG3      | calcium channel, voltage-dependent, gamma subunit 3  | CCDS10620.1          | chr16_24372691-24372691_G_C        | 152G>A               | Substitution  | Nonsynonymous coding | 45%           |
| MM01T  | CALCOCO1    | calcium binding and coiled-coil domain 1             | CCDS8864.1           | chr12_54105819-54105819_C_T        | 662R>H               | Substitution  | Nonsynonymous coding | 31%           |
| MM01T  | CERS3       | ceramide synthase 3                                  | CCDS10384.1          | chr15_101024858-101024858_G_T      | 102L>M               | Substitution  | Nonsynonymous coding | 26%           |
| MM01T  | DOCK3       | dedicator of cytokinesis 3                           | CCDS46835.1          | chr3_51386368-51386368_G_A         | 1334R>Q              | Substitution  | Nonsynonymous coding | 15%           |
| MM01T  | EVC         | Ellis van Creveld syndrome                           | CCDS3383.1           | chr4_5800320-5800320_G_A           | 702R>H               | Substitution  | Nonsynonymous coding | 73%           |
| MM01T  | FAM135B     | family with sequence similarity 135, member B        | CCDS6375.2           | chr8_139149483-139149483_C_T       | 1308V>I              | Substitution  | Nonsynonymous coding | 53%           |
| MM01T  | FAT4        | FAT tumor suppressor homolog 4                       | CCDS3732.3           | chr4_126373056-126373056_C_T       | 3629P>S              | Substitution  | Nonsynonymous coding | 44%           |
| MM01T  | FOXA2       | forkhead box A2                                      | CCDS46585.1          | chr20_22563360-22563360_T_A        | 174I>F               | Substitution  | Nonsynonymous coding | 31%           |
| MM01T  | G6PD        | glucose-6-phosphate dehydrogenase                    | CCDS14756.2          | chrX_153762371-153762371_C_A       | 247A>S               | Substitution  | Nonsynonymous coding | 27%           |
| MM01T  | GLT8D2      | glycosyltransferase 8 domain containing 2            | CCDS9096.1           | chr12_104388251-104388251_C_T      | 210R>Q               | Substitution  | Nonsynonymous coding | 40%           |
| MM01T  | HMCN2       | hemicentin 2                                         | ENST00000420499      | chr9_133230346-133230346_G_A       | 346R>Q               | Substitution  | Nonsynonymous coding | 49%           |
| MM01T  | KRAS        | v-Ki-ras2 Kirsten rat sarcoma viral oncogene homolog | CCDS8703.1           | chr12_25398284-25398284_C_A        | 12G>V                | Substitution  | Nonsynonymous coding | 57%           |
| MM01T  | PARD3       | par-3 partitioning defective 3 homolog               | CCDS7178.1           | chr10_34663884-34663884_G_T        | 529S>X               | Substitution  | Nonsense             | 13%           |
| MM01T  | PGD         | phosphogluconate dehydrogenase                       | CCDS113.1            | chr1_10473287-10473287_G_A         | 275G>S               | Substitution  | Nonsynonymous coding | 61%           |
| MM01T  | POR         | P450 (cytochrome) oxidoreductase                     | ENST00000448410      | chr7_75601793-75601793_A_G         | 84H>R                | Substitution  | Nonsynonymous coding | 56%           |
| MM01T  | RBM5        | RNA binding motif protein 5                          | CCDS2810.1           | chr3_50155827-50155827_G_A         | 796A>T               | Substitution  | Nonsynonymous coding | 21%           |
| MM01T  | REEP4       | receptor accessory protein 4                         | CCDS6024.1           | chr8_21996958-21996958_C_T         | 130A>T               | Substitution  | Nonsynonymous coding | 21%           |
| MM01T  | SH3GL1      | SH3-domain GRB2-like 1                               | CCDS32874.1          | chr19_4362367-4362367_C_T          | 290R>Q               | Substitution  | Nonsynonymous coding | 45%           |
| MM01T  | SORCS1      | sortilin-related VPS10 domain containing receptor 1  | CCDS31283.1          | chr10_108924094-108924094_C_A      | 64R>M                | Substitution  | Nonsynonymous coding | 69%           |
| MM01T  | SPTBN1      | spectrin, beta, non-erythrocytic 1                   | CCDS33198.1          | chr2_54844824-54844824_C_T         | 216R>W               | Substitution  | Nonsynonymous coding | 25%           |
| MM01T  | TLE4        | transducin-like enhancer of split 4                  | ENST00000376534      | chr9_82322044-82322044_G_T         | 315D>Y               | Substitution  | Nonsynonymous coding | 33%           |
| MM01T  | TP53        | tumor protein p53                                    | CCDS11118.1          | chr17_7578535-7578535_T_A          | 132K>M               | Substitution  | Nonsynonymous coding | 82%           |

|       |          |                                                                       |                 |                                |         |              |                      |     |
|-------|----------|-----------------------------------------------------------------------|-----------------|--------------------------------|---------|--------------|----------------------|-----|
| MM01T | VPS13C   | vacuolar protein sorting 13 homolog                                   | CCDS32257.1     | chr15_62246704-62246704_A_C    | 1405D>E | Substitution | Nonsynonymous coding | 20% |
| MM02T | ACVR2A   | activin A receptor, type IIA                                          | CCDS33301.1     | chr2_148674853-148674856_ACAA_ | NA      | Deletion     | Frameshift           | 35% |
| MM02T | C12orf54 | chromosome 12 open reading frame 54                                   | CCDS8764.1      | chr12_48888682-48888682_C_A    | 115T>K  | Substitution | Nonsynonymous coding | 45% |
| MM02T | CCDC88A  | coiled-coil domain containing 88A                                     | CCDS46288.1     | chr2_55536123-55536123_C_G     | 1402L>F | Substitution | Nonsynonymous coding | 13% |
| MM02T | CHD8     | chromodomain helicase DNA binding protein 8                           | CCDS45081.1     | chr14_21863171-21863171_G_T    | 1485Q>K | Substitution | Nonsynonymous coding | 41% |
| MM02T | CYFIP2   | cytoplasmic FMR1 interacting protein 2                                | NM_001037332    | chr5_156747710-156747710_G_A   | 524R>Q  | Substitution | Nonsynonymous coding | 49% |
| MM02T | DENND1A  | DENN/MADD domain containing 1A                                        | CCDS35133.1     | chr9_126531801-126531801_A_T   | 58Y>X   | Substitution | Nonsense             | 32% |
| MM02T | DLL3     | delta-like 3 (Drosophila)                                             | CCDS12538.1     | chr19_39993460-39993460_G_T    | 139A>S  | Substitution | Nonsynonymous coding | 91% |
| MM02T | DLL3     | delta-like 3 (Drosophila)                                             | CCDS12538.1     | chr19_39993461-39993461_C_T    | 139A>V  | Substitution | Nonsynonymous coding | 92% |
| MM02T | DOCK1    | dedicator of cytokinesis 1                                            | NM_001380       | chr10_129172446-129172446_G_A  | 1194E>K | Substitution | Nonsynonymous coding | 24% |
| MM02T | FGA      | fibrinogen alpha chain                                                | CCDS3787.1      | chr4_155506821-155506821_G_A   | 587T>M  | Substitution | Nonsynonymous coding | 90% |
| MM02T | FRMPD1   | FERM and PDZ domain containing 1                                      | CCDS56612.1     | chr9_37740320-37740320_G_A     | 599G>S  | Substitution | Nonsynonymous coding | 45% |
| MM02T | GGA2     | golgi-associated, gamma adaptin ear containing, ARF binding protein 2 | CCDS10611.1     | chr16_23489793-23489793_C_G    | 396K>N  | Substitution | Nonsynonymous coding | 43% |
| MM02T | GTPBP5   | GTP binding protein 5 (putative)                                      | CCDS13492.1     | chr20_60768528-60768528_G_A    | 18V>M   | Substitution | Nonsynonymous coding | 47% |
| MM02T | HERC4    | HECT and RLD domain containing E3 ubiquitin protein ligase 4          | CCDS41533.1     | chr10_69797879-69797879_C_A    | 145G>V  | Substitution | Nonsynonymous coding | 33% |
| MM02T | HRASLS5  | HRAS-like suppressor family, member 5                                 | CCDS8044.1      | chr11_63258454-63258454_A_G    | 18I>T   | Substitution | Nonsynonymous coding | 20% |
| MM02T | KCNGB4   | potassium voltage-gated channel, subfamily G, member 4                | CCDS10945.1     | chr16_84256602-84256602_A_G    | 261Y>H  | Substitution | Nonsynonymous coding | 89% |
| MM02T | KIAA2022 | Uncharacterized protein                                               | CCDS35337.1     | chrX_73960110-73960110_C_G     | 1428D>H | Substitution | Nonsynonymous coding | 42% |
| MM02T | KIAA2022 | Uncharacterized protein                                               | CCDS35337.1     | chrX_73960550-73960550_C_T     | 1281G>E | Substitution | Nonsynonymous coding | 43% |
| MM02T | LAMA4    | laminin, alpha 4                                                      | CCDS43491.1     | chr6_112457443-112457443_C_T   | 1099R>K | Substitution | Nonsynonymous coding | 41% |
| MM02T | LPXN     | leupaxin                                                              | CCDS7969.1      | chr11_58295162-58295164_AAG_   | NA      | Deletion     | In-frame deletion    | 59% |
| MM02T | MEX3D    | mex-3 homolog D (C. elegans)                                          | CCDS32865.2     | chr19_1556347-1556347_G_A      | 391R>C  | Substitution | Nonsynonymous coding | 37% |
| MM02T | MTHFR    | methylenetetrahydrofolate reductase (NAD(P)H)                         | ENST00000376583 | chr1_11863537-11863537_C_T     | 12G>E   | Substitution | Nonsynonymous coding | 41% |
| MM02T | MYO5A    | myosin VA (heavy chain 12, myosin)                                    | CCDS42037.1     | chr15_52720601-52720601_A_T    | 102Y>N  | Substitution | Nonsynonymous coding | 51% |
| MM02T | MYOM1    | myomesin 1                                                            | CCDS45824.1     | chr18_3129419-3129419_A_G      | 869F>L  | Substitution | Nonsynonymous coding | 32% |
| MM02T | NHLRC1   | NHL repeat containing 1                                               | CCDS4542.1      | chr6_18122185-18122185_G_A     | 218P>L  | Substitution | Nonsynonymous coding | 28% |
| MM02T | NOTCH2   | notch 2                                                               | ENST00000401649 | chr1_120539354-120539357_TTAT_ | NA      | Deletion     | Frameshift           | 14% |
| MM02T | NT5DC3   | 5'-nucleotidase domain containing 3                                   | CCDS41824.1     | chr12_104181304-104181304_C_A  | 368G>V  | Substitution | Nonsynonymous coding | 49% |
| MM02T | OR1L4    | olfactory receptor, family 1, subfamily L, member 4                   | CCDS35129.1     | chr9_125486717-125486717_G_A   | 150C>Y  | Substitution | Nonsynonymous coding | 11% |
| MM02T | OTOG     | otogelin                                                              | ENST00000399391 | chr11_17614747-17614747_C_G    | 1017S>X | Substitution | Nonsense             | 89% |
| MM02T | OTOG     | otogelin                                                              | ENST00000399391 | chr11_17614822-17614822_C_A    | 1042S>Y | Substitution | Nonsynonymous coding | 85% |
| MM02T | PCDHB10  | protocadherin beta 10                                                 | CCDS4252.1      | chr5_140572858-140572858_G_T   | 245A>S  | Substitution | Nonsynonymous coding | 25% |

|       |         |                                                                |             |                               |         |              |                      |     |
|-------|---------|----------------------------------------------------------------|-------------|-------------------------------|---------|--------------|----------------------|-----|
| MM02T | PDGFB   | platelet-derived growth factor beta polypeptide                | CCDS13987.1 | chr22_39627737-39627737_C_T   | 116A>T  | Substitution | Nonsynonymous coding | 38% |
| MM02T | PGK1    | phosphoglycerate kinase 1                                      | CCDS14438.1 | chrX_77365416-77365416_T_G    | _ISV+2> | Substitution | Splice site donor    | 45% |
| MM02T | PHF12   | PHD finger protein 12                                          | CCDS32598.1 | chr17_27233221-27233221_G_A   | 999R>C  | Substitution | Nonsynonymous coding | 96% |
| MM02T | PKD2L1  | polycystic kidney disease 2-like 1                             | CCDS7492.1  | chr10_102048788-102048788_G_A | 759P>L  | Substitution | Nonsynonymous coding | 31% |
| MM02T | PLEC    | plectin                                                        | CCDS43772.1 | chr8_144997729-144997729_T_C  | 2260E>G | Substitution | Nonsynonymous coding | 31% |
| MM02T | PLEC    | plectin                                                        | CCDS43772.1 | chr8_144997730-144997730_C_T  | 2260E>K | Substitution | Nonsynonymous coding | 31% |
| MM02T | PTPRA   | protein tyrosine phosphatase, receptor type, A                 | CCDS13038.1 | chr20_3002812-3002812_A_G     | 425K>R  | Substitution | Nonsynonymous coding | 56% |
| MM02T | SCN4A   | sodium channel, voltage-gated, type IV, alpha subunit          | CCDS45761.1 | chr17_62018831-62018831_G_A   | 1604A>V | Substitution | Nonsynonymous coding | 62% |
| MM02T | SEZ6L   | seizure related 6 homolog (mouse)-like                         | CCDS13833.1 | chr22_26747038-26747038_G_A   | 810G>R  | Substitution | Nonsynonymous coding | 48% |
| MM02T | SHISA3  | shisa homolog 3 ( <i>Xenopus laevis</i> )                      | CCDS33979.1 | chr4_42400096-42400096_G_T    | 8C>F    | Substitution | Nonsynonymous coding | 88% |
| MM02T | SNAP25  | synaptosomal-associated protein, 25kDa                         | CCDS13110.1 | chr20_10273881-10273881_C_T   | 79T>M   | Substitution | Nonsynonymous coding | 53% |
| MM02T | SPOP    | speckle-type POZ protein                                       | CCDS11551.1 | chr17_47696599-47696599_T_C   | 117M>V  | Substitution | Nonsynonymous coding | 64% |
| MM02T | THADA   | thyroid adenoma associated                                     | CCDS46268.1 | chr2_43519337-43519337_C_T    | 1615D>N | Substitution | Nonsynonymous coding | 27% |
| MM02T | TMEM82  | transmembrane protein 82                                       | CCDS30608.1 | chr1_16069091-16069091_G_A    | 13G>S   | Substitution | Nonsynonymous coding | 48% |
| MM02T | TP53    | tumor protein p53                                              | CCDS11118.1 | chr17_7577565-7577565_T_C     | 239N>S  | Substitution | Nonsynonymous coding | 88% |
| MM02T | TPM1    | tropomyosin 1 (alpha)                                          | CCDS32262.1 | chr15_63353928-63353928_G_A   | 194E>K  | Substitution | Nonsynonymous coding | 16% |
| MM02T | TREML4  | triggering receptor expressed on myeloid cells-like 4          | CCDS34446.1 | chr6_41196683-41196683_C_A    | 99L>M   | Substitution | Nonsynonymous coding | 13% |
| MM02T | UBR2    | ubiquitin protein ligase E3 component n-recogin 2              | CCDS4870.1  | chr6_42647537-42647537_A_     | NA      | Deletion     | Frameshift           | 21% |
| MM02T | UNC79   | unc-79 homolog ( <i>C. elegans</i> )                           | CCDS9911.2  | chr14_94160716-94160716_A_T   | 2364L>F | Substitution | Nonsynonymous coding | 58% |
| MM02T | VPS13A  | vacuolar protein sorting 13 homolog A ( <i>S. cerevisiae</i> ) | CCDS6655.1  | chr9_79862242-79862242_T_G    | 656I>M  | Substitution | Nonsynonymous coding | 46% |
| MM02T | VSTM1   | V-set and transmembrane domain containing 1                    | CCDS12872.1 | chr19_54545044-54545044_C_A   | 194V>L  | Substitution | Nonsynonymous coding | 40% |
| MM02T | WDR74   | WD repeat domain 74                                            | CCDS44630.1 | chr11_62603008-62603008_G_A   | _ISV-4> | Substitution | Splice site acceptor | 13% |
| MM03T | APCS    | amyloid P component, serum                                     | CCDS1186.1  | chr1_159558415-159558415_C_A  | 197L>I  | Substitution | Nonsynonymous coding | 19% |
| MM03T | APH1B   | anterior pharynx defective 1 homolog B ( <i>C. elegans</i> )   | CCDS10184.1 | chr15_63569833-63569833_C_T   | 4A>V    | Substitution | Nonsynonymous coding | 27% |
| MM03T | APOB    | apolipoprotein B (including Ag(x) antigen)                     | CCDS1703.1  | chr2_21232560-21232560_C_A    | 2394V>F | Substitution | Nonsynonymous coding | 53% |
| MM03T | CDHR3   | cadherin-related family member 3                               | CCDS47684.1 | chr7_105645093-105645093_G_A  | 338V>I  | Substitution | Nonsynonymous coding | 12% |
| MM03T | CMTM6   | CKLF-like MARVEL transmembrane domain containing 6             | CCDS2653.1  | chr3_32529532-32529532_T_C    | NA      | Substitution | Splice site acceptor | 52% |
| MM03T | COBL    | cordons-bleu WH2 repeat protein                                | CCDS34637.1 | chr7_51111341-51111341_G_A    | 382P>L  | Substitution | Nonsynonymous coding | 10% |
| MM03T | DENND5A | DENN/MADD domain containing 5A                                 | CCDS31423.1 | chr11_9191476-9191476_G_A     | 693P>L  | Substitution | Nonsynonymous coding | 14% |
| MM03T | DICER1  | dicer 1, ribonuclease type III                                 | CCDS9931.1  | chr14_95560464-95560464_C_T   | 1709D>N | Substitution | Nonsynonymous coding | 42% |
| MM03T | DOPEY2  | dopey family member 2                                          | CCDS13643.1 | chr21_37618389-37618389_G_C   | 1371V>L | Substitution | Nonsynonymous coding | 23% |
| MM03T | EAF2    | ELL associated factor 2                                        | CCDS3006.1  | chr3_121575958-121575958_G_A  | 147E>K  | Substitution | Nonsynonymous coding | 23% |

|       |          |                                                                         |                 |                               |         |              |                      |     |
|-------|----------|-------------------------------------------------------------------------|-----------------|-------------------------------|---------|--------------|----------------------|-----|
| MM03T | ESCO1    | establishment of cohesion 1 homolog 1 (S. cerevisiae)                   | CCDS32800.1     | chr18_19154689-19154689_G_A   | 39S>L   | Substitution | Nonsynonymous coding | 10% |
| MM03T | EXT2     | exostosin 2                                                             | CCDS7908.1      | chr11_44146445-44146445_G_A   | 284D>N  | Substitution | Nonsynonymous coding | 11% |
| MM03T | FAM209A  | family with sequence similarity 209, member A                           | CCDS33493.1     | chr20_55100084-55100084_C_A   | 74Q>K   | Substitution | Nonsynonymous coding | 16% |
| MM03T | GPATCH2L | G patch domain containing 2-like                                        | CCDS9848.1      | chr14_76621212-76621212_C_G   | 169S>C  | Substitution | Nonsynonymous coding | 30% |
| MM03T | GPR179   | G protein-coupled receptor 179                                          | CCDS42308.1     | chr17_36485971-36485971_T_C   | 1161T>A | Substitution | Nonsynonymous coding | 49% |
| MM03T | HSPA12A  | heat shock 70kDa protein 12A                                            | CCDS41569.1     | chr10_118434798-118434798_G_A | 508Q>X  | Substitution | Nonsense             | 32% |
| MM03T | KCNH3    | potassium voltage-gated channel, subfamily H (eag-related), member 3    | CCDS8786.1      | chr12_49937758-49937758_C_A   | 295P>Q  | Substitution | Nonsynonymous coding | 37% |
| MM03T | KY       | kyphoscoliosis peptidase                                                | CCDS46920.1     | chr3_134339613-134339613_C_A  | 190W>C  | Substitution | Nonsynonymous coding | 28% |
| MM03T | LAMB3    | laminin, beta 3                                                         | CCDS1487.1      | chr1_209799150-209799150_C_T  | 607A>T  | Substitution | Nonsynonymous coding | 39% |
| MM03T | MUM1L1   | melanoma associated antigen (mutated) 1-like 1                          | ENST00000337685 | chrX_105451286-105451286_G_T  | 621D>Y  | Substitution | Nonsynonymous coding | 27% |
| MM03T | OR8G5    | olfactory receptor, family 8, subfamily G, member 5                     | NM_001005198    | chr11_124134891-124134891_G_C | 57E>Q   | Substitution | Nonsynonymous coding | 41% |
| MM03T | OR9G1    | olfactory receptor, family 9, subfamily G, member 1                     | CCDS31536.1     | chr11_56468660-56468660_C_A   | 266S>Y  | Substitution | Nonsynonymous coding | 17% |
| MM03T | PRDM15   | PR domain containing 15                                                 | CCDS13676.1     | chr21_43236168-43236168_C_T   | 1128R>H | Substitution | Nonsynonymous coding | 23% |
| MM03T | PROS1    | protein S (alpha)                                                       | CCDS2923.1      | chr3_93646242-93646242_T_A    | 29K>M   | Substitution | Nonsynonymous coding | 21% |
| MM03T | SH3BP4   | SH3-domain binding protein 4                                            | CCDS2513.1      | chr2_235951000-235951000_C_A  | 529F>L  | Substitution | Nonsynonymous coding | 23% |
| MM03T | SNX9     | sorting nexin 9                                                         | CCDS5253.1      | chr6_158359770-158359770_G_C  | 547A>P  | Substitution | Nonsynonymous coding | 14% |
| MM03T | STK36    | serine/threonine kinase 36                                              | CCDS2421.1      | chr2_219564039-219564039_C_T  | 1258R>W | Substitution | Nonsynonymous coding | 14% |
| MM03T | TBC1D8   | TBC1 domain family, member 8 (with GRAM domain)                         | CCDS46375.1     | chr2_101624725-101624725_A_G  | 994I>T  | Substitution | Nonsynonymous coding | 53% |
| MM03T | TDRD6    | tudor domain containing 6                                               | CCDS34470.1     | chr6_46659722-46659722_A_     | NA      | Deletion     | Frameshift           | 38% |
| MM03T | TP53     | tumor protein p53                                                       | CCDS11118.1     | chr17_7578395-7578395_G_T     | 179H>N  | Substitution | Nonsynonymous coding | 66% |
| MM04T | MARCH6   | membrane-associated ring finger (C3HC4) 6, E3 ubiquitin protein ligase  | CCDS34135.1     | chr5_10378897-10378897_G_A    | 48R>Q   | Substitution | Nonsynonymous coding | 29% |
| MM04T | MARCH7   | membrane-associated ring finger (C3HC4) 7, E3 ubiquitin protein ligase  | CCDS2210.1      | chr2_160621182-160621182_G_A  | 685E>K  | Substitution | Nonsynonymous coding | 34% |
| MM04T | MARCH10  | membrane-associated ring finger (C3HC4) 10, E3 ubiquitin protein ligase | CCDS11635.1     | chr17_60814055-60814055_C_T   | 392G>S  | Substitution | Nonsynonymous coding | 27% |
| MM04T | SEPT14   | septin 14                                                               | CCDS5519.2      | chr7_55872965-55872965_C_A    | 369E>X  | Substitution | Nonsense             | 33% |
| MM04T | A1CF     | APOBEC1 complementation factor                                          | CCDS7242.1      | chr10_52569732-52569732_G_T   | 519L>M  | Substitution | Nonsynonymous coding | 18% |
| MM04T | A2M      | alpha-2-macroglobulin                                                   | CCDS44827.1     | chr12_9225468-9225468_C_T     | NA      | Substitution | Splice site acceptor | 43% |
| MM04T | A2ML1    | alpha-2-macroglobulin-like 1                                            | CCDS8596.2      | chr12_8976401-8976401_A_G     | 111K>R  | Substitution | Nonsynonymous coding | 32% |
| MM04T | A2ML1    | alpha-2-macroglobulin-like 1                                            | CCDS8596.2      | chr12_9006837-9006837_C_A     | 902L>I  | Substitution | Nonsynonymous coding | 20% |
| MM04T | A2ML1    | alpha-2-macroglobulin-like 1                                            | CCDS8596.2      | chr12_8975302-8975302_G_T     | 19E>X   | Substitution | Nonsense             | 30% |
| MM04T | AADA2L2  | arylacetamide deacetylase-like 2                                        | CCDS3161.2      | chr3_151475150-151475150_C_A  | 325S>Y  | Substitution | Nonsynonymous coding | 18% |
| MM04T | AAMDC    | adipogenesis associated, Mth938 domain containing                       | CCDS8254.1      | chr11_77583250-77583250_G_T   | 86K>N   | Substitution | Nonsynonymous coding | 33% |
| MM04T | AASDH    | aminoadipate-semialdehyde dehydrogenase                                 | CCDS3504.1      | chr4_57215746-57215746_G_T    | 724S>Y  | Substitution | Nonsynonymous coding | 26% |

|       |          |                                                                         |              |                               |         |              |                      |     |
|-------|----------|-------------------------------------------------------------------------|--------------|-------------------------------|---------|--------------|----------------------|-----|
| MM04T | AASDHPTT | aminoadipate-semialdehyde dehydrogenase-phosphopantetheinyl transferase | CCDS31664.1  | chr11_105962145-105962145_G_T | 212V>F  | Substitution | Nonsynonymous coding | 24% |
| MM04T | AASS     | aminoadipate-semialdehyde synthase                                      | CCDS5783.1   | chr7_121756793-121756793_G_A  | 263T>M  | Substitution | Nonsynonymous coding | 22% |
| MM04T | AATK     | apoptosis-associated tyrosine kinase                                    | CCDS45807.1  | chr17_79094942-79094942_G_A   | 932P>S  | Substitution | Nonsynonymous coding | 31% |
| MM04T | ABCA1    | ATP-binding cassette, sub-family A (ABC1), member 1                     | CCDS6762.1   | chr9_107562184-107562184_T_G  | 1620K>T | Substitution | Nonsynonymous coding | 33% |
| MM04T | ABCA1    | ATP-binding cassette, sub-family A (ABC1), member 1                     | CCDS6762.1   | chr9_107593262-107593262_C_A  | 612E>D  | Substitution | Nonsynonymous coding | 24% |
| MM04T | ABCA12   | ATP-binding cassette, sub-family A (ABC1), member 12                    | CCDS33372.1  | chr2_215854093-215854093_A_C  | 1263I>M | Substitution | Nonsynonymous coding | 32% |
| MM04T | ABCA12   | ATP-binding cassette, sub-family A (ABC1), member 12                    | CCDS33372.1  | chr2_215884458-215884458_C_A  | 450E>D  | Substitution | Nonsynonymous coding | 29% |
| MM04T | ABCA12   | ATP-binding cassette, sub-family A (ABC1), member 12                    | CCDS33372.1  | chr2_215884496-215884496_C_T  | 438E>K  | Substitution | Nonsynonymous coding | 31% |
| MM04T | ABCA12   | ATP-binding cassette, sub-family A (ABC1), member 12                    | CCDS33372.1  | chr2_215917230-215917230_C_T  | 163R>Q  | Substitution | Nonsynonymous coding | 27% |
| MM04T | ABCA12   | ATP-binding cassette, sub-family A (ABC1), member 12                    | CCDS33372.1  | chr2_215919325-215919325_T_G  | 127Q>H  | Substitution | Nonsynonymous coding | 22% |
| MM04T | ABCA13   | ATP-binding cassette, sub-family A (ABC1), member 13                    | CCDS47584.1  | chr7_48315783-48315783_A_T    | 2174N>Y | Substitution | Nonsynonymous coding | 41% |
| MM04T | ABCA13   | ATP-binding cassette, sub-family A (ABC1), member 13                    | CCDS47584.1  | chr7_48316130-48316130_A_C    | 2289K>N | Substitution | Nonsynonymous coding | 31% |
| MM04T | ABCA13   | ATP-binding cassette, sub-family A (ABC1), member 13                    | CCDS47584.1  | chr7_48318910-48318910_G_T    | 2707D>Y | Substitution | Nonsynonymous coding | 26% |
| MM04T | ABCA13   | ATP-binding cassette, sub-family A (ABC1), member 13                    | CCDS47584.1  | chr7_48319407-48319407_G_T    | 2872E>D | Substitution | Nonsynonymous coding | 25% |
| MM04T | ABCA13   | ATP-binding cassette, sub-family A (ABC1), member 13                    | CCDS47584.1  | chr7_48684325-48684325_C_A    | 5019S>Y | Substitution | Nonsynonymous coding | 24% |
| MM04T | ABCA4    | ATP-binding cassette, sub-family A (ABC1), member 4                     | CCDS747.1    | chr1_94526106-94526106_G_A    | 716T>M  | Substitution | Nonsynonymous coding | 18% |
| MM04T | ABCA5    | ATP-binding cassette, sub-family A (ABC1), member 5                     | CCDS11685.1  | chr17_67293434-67293434_C_A   | 445R>I  | Substitution | Nonsynonymous coding | 17% |
| MM04T | ABCA5    | ATP-binding cassette, sub-family A (ABC1), member 5                     | CCDS11685.1  | chr17_67300881-67300881_C_T   | 287A>T  | Substitution | Nonsynonymous coding | 16% |
| MM04T | ABCA6    | ATP-binding cassette, sub-family A (ABC1), member 6                     | CCDS11683.1  | chr17_67107010-67107010_T_G   | 735K>T  | Substitution | Nonsynonymous coding | 26% |
| MM04T | ABCA6    | ATP-binding cassette, sub-family A (ABC1), member 6                     | CCDS11683.1  | chr17_67108407-67108407_T_G   | 683K>N  | Substitution | Nonsynonymous coding | 31% |
| MM04T | ABCA8    | ATP-binding cassette, sub-family A (ABC1), member 8                     | CCDS11680.1  | chr17_66879941-66879941_G_T   | 1193P>H | Substitution | Nonsynonymous coding | 33% |
| MM04T | ABCA8    | ATP-binding cassette, sub-family A (ABC1), member 8                     | CCDS11680.1  | chr17_66879986-66879986_C_T   | 1178R>Q | Substitution | Nonsynonymous coding | 42% |
| MM04T | ABCA8    | ATP-binding cassette, sub-family A (ABC1), member 8                     | CCDS11680.1  | chr17_66902188-66902188_A_G   | 759S>P  | Substitution | Nonsynonymous coding | 23% |
| MM04T | ABCB1    | ATP-binding cassette, sub-family B (MDR/TAP), member 1                  | CCDS5608.1   | chr7_87170695-87170695_G_T    | 766S>Y  | Substitution | Nonsynonymous coding | 34% |
| MM04T | ABCB11   | ATP-binding cassette, sub-family B (MDR/TAP), member 11                 | CCDS46444.1  | chr2_169787308-169787308_G_A  | 1093S>L | Substitution | Nonsynonymous coding | 38% |
| MM04T | ABCB4    | ATP-binding cassette, sub-family B (MDR/TAP), member 4                  | CCDS5606.1   | chr7_87043027-87043027_T_C    | 897T>A  | Substitution | Nonsynonymous coding | 16% |
| MM04T | ABCB4    | ATP-binding cassette, sub-family B (MDR/TAP), member 4                  | CCDS5606.1   | chr7_87046661-87046661_T_G    | 883K>N  | Substitution | Nonsynonymous coding | 33% |
| MM04T | ABCB5    | ATP-binding cassette, sub-family B (MDR/TAP), member 5                  | NM_001163941 | chr7_20687224-20687224_G_A    | 350A>T  | Substitution | Nonsynonymous coding | 26% |
| MM04T | ABCB5    | ATP-binding cassette, sub-family B (MDR/TAP), member 5                  | NM_001163993 | chr7_20706384-20706384_A_C    | 125K>N  | Substitution | Nonsynonymous coding | 42% |
| MM04T | ABCB5    | ATP-binding cassette, sub-family B (MDR/TAP), member 5                  | CCDS5371.1   | chr7_20721180-20721180_G_A    | 142R>Q  | Substitution | Nonsynonymous coding | 28% |
| MM04T | ABCB7    | ATP-binding cassette, sub-family B (MDR/TAP), member 7                  | CCDS14428.1  | chrX_74273266-74273266_C_A    | 734R>I  | Substitution | Nonsynonymous coding | 20% |
| MM04T | ABCB9    | ATP-binding cassette, sub-family B (MDR/TAP), member 9                  | CCDS9241.1   | chr12_123425402-123425402_C_A | 507E>D  | Substitution | Nonsynonymous coding | 27% |

|       |             |                                                                                                |                 |                               |         |              |                      |     |
|-------|-------------|------------------------------------------------------------------------------------------------|-----------------|-------------------------------|---------|--------------|----------------------|-----|
| MM04T | ABCC11      | ATP-binding cassette, sub-family C (CFTR/MRP), member 11                                       | CCDS10732.1     | chr16_48239414-48239414_C_T   | 572G>E  | Substitution | Nonsynonymous coding | 22% |
| MM04T | ABCC11      | ATP-binding cassette, sub-family C (CFTR/MRP), member 11                                       | CCDS10732.1     | chr16_48250116-48250116_G_A   | 287S>L  | Substitution | Nonsynonymous coding | 38% |
| MM04T | ABCC12      | ATP-binding cassette, sub-family C (CFTR/MRP), member 12                                       | CCDS10730.1     | chr16_48119612-48119612_C_A   | 1240M>I | Substitution | Nonsynonymous coding | 34% |
| MM04T | ABCC12      | ATP-binding cassette, sub-family C (CFTR/MRP), member 12                                       | CCDS10730.1     | chr16_48134909-48134909_C_A   | 971R>I  | Substitution | Nonsynonymous coding | 20% |
| MM04T | ABCC2       | ATP-binding cassette, sub-family C (CFTR/MRP), member 2                                        | CCDS7484.1      | chr10_101563849-101563849_C_T | 428A>V  | Substitution | Nonsynonymous coding | 30% |
| MM04T | ABCC4       | ATP-binding cassette, sub-family C (CFTR/MRP), member 4                                        | CCDS9474.1      | chr13_95839079-95839079_C_A   | 474R>I  | Substitution | Nonsynonymous coding | 18% |
| MM04T | ABCC4       | ATP-binding cassette, sub-family C (CFTR/MRP), member 4                                        | CCDS9474.1      | chr13_95899972-95899972_C_A   | 37R>L   | Substitution | Nonsynonymous coding | 24% |
| MM04T | ABCC4       | ATP-binding cassette, sub-family C (CFTR/MRP), member 4                                        | CCDS9474.1      | chr13_95673939-95673939_A_    | NA      | Deletion     | Splice site acceptor | 11% |
| MM04T | ABCC8       | ATP-binding cassette, sub-family C (CFTR/MRP), member 8                                        | CCDS31437.1     | chr11_17424260-17424260_G_T   | 1200L>I | Substitution | Nonsynonymous coding | 28% |
| MM04T | ABCC9       | ATP-binding cassette, sub-family C (CFTR/MRP), member 9                                        | CCDS8693.1      | chr12_22005054-22005054_G_A   | 916R>W  | Substitution | Nonsynonymous coding | 43% |
| MM04T | ABCC9       | ATP-binding cassette, sub-family C (CFTR/MRP), member 9                                        | CCDS8693.1      | chr12_22068777-22068777_C_A   | 214R>I  | Substitution | Nonsynonymous coding | 24% |
| MM04T | ABCD2       | ATP-binding cassette, sub-family D (ALD), member 2                                             | CCDS8734.1      | chr12_39967522-39967522_G_T   | 667L>I  | Substitution | Nonsynonymous coding | 26% |
| MM04T | ABCD2       | ATP-binding cassette, sub-family D (ALD), member 2                                             | CCDS8734.1      | chr12_39980008-39980008_G_T   | 580L>M  | Substitution | Nonsynonymous coding | 23% |
| MM04T | ABCD3       | ATP-binding cassette, sub-family D (ALD), member 3                                             | CCDS749.1       | chr1_94964528-94964528_C_T    | 520R>X  | Substitution | Nonsense             | 20% |
| MM04T | ABCF1       | ATP-binding cassette, sub-family F (GCN20), member 1                                           | CCDS34380.1     | chr6_30552322-30552322_G_A    | 457R>H  | Substitution | Nonsynonymous coding | 20% |
| MM04T | ABCF1       | ATP-binding cassette, sub-family F (GCN20), member 1                                           | CCDS34380.1     | chr6_30557940-30557940_C_T    | 750R>X  | Substitution | Nonsense             | 22% |
| MM04T | ABCF3       | ATP-binding cassette, sub-family F (GCN20), member 3                                           | CCDS3254.1      | chr3_183906012-183906012_C_T  | 218T>M  | Substitution | Nonsynonymous coding | 21% |
| MM04T | ABHD16B     | abhydrolase domain containing 16B                                                              | CCDS13539.1     | chr20_62493425-62493425_G_A   | 178E>K  | Substitution | Nonsynonymous coding | 17% |
| MM04T | ABHD2       | abhydrolase domain containing 2                                                                | CCDS10348.1     | chr15_89736523-89736523_C_A   | 352L>I  | Substitution | Nonsynonymous coding | 12% |
| MM04T | ABHD4       | abhydrolase domain containing 4                                                                | CCDS9572.1      | chr14_23072978-23072978_C_T   | 212P>S  | Substitution | Nonsynonymous coding | 37% |
| MM04T | ABHD5       | abhydrolase domain containing 5                                                                | CCDS2711.1      | chr3_43756447-43756447_C_A    | 224L>I  | Substitution | Nonsynonymous coding | 13% |
| MM04T | ABI3BP      | ABI family, member 3 (NESH) binding protein                                                    | CCDS46880.1     | chr3_100473530-100473530_T_G  | 908E>A  | Substitution | Nonsynonymous coding | 31% |
| MM04T | ABI3BP      | ABI family, member 3 (NESH) binding protein                                                    | ENST00000383691 | chr3_100539960-100539960_G_A  | NA      | Substitution | Splice site acceptor | 29% |
| MM04T | ABL2        | v-abl Abelson murine leukemia viral oncogene homolog 2                                         | CCDS30947.1     | chr1_179077171-179077171_C_A  | 1077E>D | Substitution | Nonsynonymous coding | 34% |
| MM04T | ABL2        | v-abl Abelson murine leukemia viral oncogene homolog 2                                         | CCDS30947.1     | chr1_179077544-179077544_G_T  | 953S>Y  | Substitution | Nonsynonymous coding | 22% |
| MM04T | ABL2        | v-abl Abelson murine leukemia viral oncogene homolog 2                                         | CCDS30947.1     | chr1_179078135-179078135_A_G  | 756L>S  | Substitution | Nonsynonymous coding | 26% |
| MM04T | ABL2        | v-abl Abelson murine leukemia viral oncogene homolog 2                                         | CCDS41441.1     | chr1_179112145-179112145_C_A  | 12S>I   | Substitution | Nonsynonymous coding | 18% |
| MM04T | ABLIM1      | actin binding LIM protein 1                                                                    | CCDS7590.1      | chr10_116361657-116361657_C_A | 103G>V  | Substitution | Nonsynonymous coding | 19% |
| MM04T | ABLIM2      | actin binding LIM protein family, member 2                                                     | CCDS47016.1     | chr4_8009775-8009775_G_T      | 469F>L  | Substitution | Nonsynonymous coding | 31% |
| MM04T | ABO         | ABO blood group (transferase A, alpha 1-3-N-acetylgalactosaminyltransferase; transferase       | ENST00000319878 | chr9_136131183-136131183_C_T  | 311R>H  | Substitution | Nonsynonymous coding | 25% |
| MM04T | AC002472.13 | Leucine-rich repeat-containing protein LOC400891 [Source:UniProtKB/Swiss-Characterized protein | ENST00000342608 | chr22_21401752-21401752_G_T   | 83E>X   | Substitution | Nonsense             | 31% |
| MM04T | AC005544.1  | Uncharacterized protein [Source:UniProtKB/TrEMBL;Acc:HOY3C3]                                   | ENST00000375684 | chr17_65028110-65028110_A_G   | 188N>S  | Substitution | Nonsynonymous coding | 25% |



|       |             |                                                                                  |                 |                               |         |              |                      |     |
|-------|-------------|----------------------------------------------------------------------------------|-----------------|-------------------------------|---------|--------------|----------------------|-----|
| MM04T | AC007249.3  | -                                                                                | ENST00000404616 | chr2_10595633-10595633_C_T    | 49S>F   | Substitution | Nonsynonymous coding | 35% |
| MM04T | AC018755.11 | HCG2008157; Uncharacterized protein; cDNA FLJ30403 fis, clone BRACE2008480       | ENST00000301439 | chr19_52096058-52096058_G_T   | 207S>Y  | Substitution | Nonsynonymous coding | 34% |
| MM04T | AC074212.3  | Uncharacterized protein<br>[Source:UniProtKB/TrEMBL;Acc:C9JSJ3]                  | ENST00000457052 | chr19_46256985-46256985_G_T   | 165Q>H  | Substitution | Nonsynonymous coding | 36% |
| MM04T | AC104809.3  | Uncharacterized protein<br>[Source:UniProtKB/TrEMBL;Acc:H7BZ55]                  | ENST00000430980 | chr2_241873875-241873875_C_T  | 40R>C   | Substitution | Nonsynonymous coding | 22% |
| MM04T | AC133919.6  | Uncharacterized protein; cDNA FLJ52651<br>[Source:UniProtKB/TrEMBL;Acc:B7Z8Y8]   | ENST00000409768 | chr16_90110235-90110235_G_T   | 91H>N   | Substitution | Nonsynonymous coding | 37% |
| MM04T | ACACA       | acetyl-CoA carboxylase alpha                                                     | CCDS42302.1     | chr17_35597396-35597396_C_A   | 1039Q>H | Substitution | Nonsynonymous coding | 31% |
| MM04T | ACACA       | acetyl-CoA carboxylase alpha                                                     | CCDS42302.1     | chr17_35605558-35605558_C_A   | 708D>Y  | Substitution | Nonsynonymous coding | 29% |
| MM04T | ACACB       | acetyl-CoA carboxylase beta                                                      | CCDS31898.1     | chr12_109644622-109644622_G_T | 1007M>I | Substitution | Nonsynonymous coding | 23% |
| MM04T | ACACB       | acetyl-CoA carboxylase beta                                                      | CCDS31898.1     | chr12_109674971-109674971_T_C | 1483F>S | Substitution | Nonsynonymous coding | 32% |
| MM04T | ACACB       | acetyl-CoA carboxylase beta                                                      | CCDS31898.1     | chr12_109674982-109674982_C_T | 1487R>C | Substitution | Nonsynonymous coding | 21% |
| MM04T | ACAN        | aggrecan                                                                         | NM_013227       | chr15_89400588-89400588_C_A   | 1591S>Y | Substitution | Nonsynonymous coding | 23% |
| MM04T | ACAP1       | ArfGAP with coiled-coil, ankyrin repeat and PH domains 1                         | CCDS11101.1     | chr17_7254650-7254650_C_T     | 720S>F  | Substitution | Nonsynonymous coding | 26% |
| MM04T | ACAT2       | acetyl-CoA acetyltransferase 2                                                   | CCDS5268.1      | chr6_160197275-160197275_C_T  | 243T>M  | Substitution | Nonsynonymous coding | 25% |
| MM04T | ACBD3       | acyl-CoA binding domain containing 3                                             | CCDS1551.1      | chr1_226346962-226346962_G_T  | 276L>I  | Substitution | Nonsynonymous coding | 31% |
| MM04T | ACCS        | 1-aminocyclopropane-1-carboxylate synthase homolog (Arabidopsis)(non-functional) | CCDS7907.1      | chr11_44105064-44105064_G_A   | 449E>K  | Substitution | Nonsynonymous coding | 32% |
| MM04T | ACIN1       | apoptotic chromatin condensation inducer 1                                       | CCDS9587.1      | chr14_23549036-23549036_G_T   | 561S>Y  | Substitution | Nonsynonymous coding | 33% |
| MM04T | ACMSD       | aminocarboxymuconate semialdehyde decarboxylase                                  | CCDS2173.2      | chr2_135630167-135630167_C_A  | 269H>N  | Substitution | Nonsynonymous coding | 29% |
| MM04T | ACO1        | aconitase 1, soluble                                                             | CCDS6525.1      | chr9_32418167-32418167_G_T    | 149R>I  | Substitution | Nonsynonymous coding | 25% |
| MM04T | ACOT9       | acyl-CoA thioesterase 9                                                          | CCDS43924.1     | chrX_23723657-23723657_C_A    | 330E>X  | Substitution | Nonsense             | 33% |
| MM04T | ACP6        | acid phosphatase 6, lysophosphatidic                                             | CCDS928.1       | chr1_147131542-147131542_G_T  | 150L>I  | Substitution | Nonsynonymous coding | 20% |
| MM04T | ACPP        | acid phosphatase, prostate                                                       | CCDS46916.1     | chr3_132051046-132051046_G_A  | 105R>Q  | Substitution | Nonsynonymous coding | 19% |
| MM04T | ACPP        | acid phosphatase, prostate                                                       | CCDS46916.1     | chr3_132075555-132075555_C_T  | 332R>W  | Substitution | Nonsynonymous coding | 21% |
| MM04T | ACSBG1      | acyl-CoA synthetase bubblegum family member 1                                    | CCDS10298.1     | chr15_78472040-78472040_G_T   | 446Q>K  | Substitution | Nonsynonymous coding | 30% |
| MM04T | ACSBG2      | acyl-CoA synthetase bubblegum family member 2                                    | CCDS12159.1     | chr19_6187410-6187410_C_A     | 553L>M  | Substitution | Nonsynonymous coding | 27% |
| MM04T | ACSL1       | acyl-CoA synthetase long-chain family member 1                                   | CCDS3839.1      | chr4_185687835-185687835_G_A  | 402R>C  | Substitution | Nonsynonymous coding | 19% |
| MM04T | ACSL1       | acyl-CoA synthetase long-chain family member 1                                   | CCDS3839.1      | chr4_185724605-185724605_C_T  | 22V>M   | Substitution | Nonsynonymous coding | 30% |
| MM04T | ACSL5       | acyl-CoA synthetase long-chain family member 5                                   | CCDS7572.1      | chr10_114176679-114176679_T_C | 429F>L  | Substitution | Nonsynonymous coding | 24% |
| MM04T | ACSM3       | acyl-CoA synthetase medium-chain family member 3                                 | CCDS10589.1     | chr16_20792355-20792355_C_A   | 281A>E  | Substitution | Nonsynonymous coding | 18% |
| MM04T | ACSM3       | acyl-CoA synthetase medium-chain family member 3                                 | CCDS10589.1     | chr16_20803358-20803358_G_A   | 454G>D  | Substitution | Nonsynonymous coding | 16% |
| MM04T | ACTN4       | actinin, alpha 4                                                                 | CCDS12518.1     | chr19_39200068-39200068_G_A   | 229E>K  | Substitution | Nonsynonymous coding | 27% |
| MM04T | ACTR10      | actin-related protein 10 homolog (S. cerevisiae)                                 | CCDS32090.1     | chr14_58698938-58698938_G_A   | 342R>Q  | Substitution | Nonsynonymous coding | 70% |
| MM04T | ACTR3       | ARP3 actin-related protein 3 homolog (yeast)                                     | CCDS33277.1     | chr2_114709367-114709367_G_T  | 341R>I  | Substitution | Nonsynonymous coding | 26% |

|       |          |                                                            |                 |                               |         |              |                      |     |
|-------|----------|------------------------------------------------------------|-----------------|-------------------------------|---------|--------------|----------------------|-----|
| MM04T | ACTR3    | ARP3 actin-related protein 3 homolog (yeast)               | CCDS33277.1     | chr2_114699799-114699799_G_T  | 241E>X  | Substitution | Nonsense             | 29% |
| MM04T | ACVR2A   | activin A receptor, type IIA                               | CCDS33301.1     | chr2_148657128-148657128_T_C  | 122V>A  | Substitution | Nonsynonymous coding | 32% |
| MM04T | ADAD1    | adenosine deaminase domain containing 1 (testis-specific)  | CCDS34058.1     | chr4_123302222-123302222_C_T  | 83P>L   | Substitution | Nonsynonymous coding | 39% |
| MM04T | ADAD2    | adenosine deaminase domain containing 2                    | CCDS10944.1     | chr16_84228698-84228698_C_T   | 283R>C  | Substitution | Nonsynonymous coding | 32% |
| MM04T | ADAL     | adenosine deaminase-like                                   | CCDS32214.1     | chr15_43627966-43627966_C_A   | 46L>I   | Substitution | Nonsynonymous coding | 25% |
| MM04T | ADAM11   | ADAM metallopeptidase domain 11                            | CCDS11486.1     | chr17_42850628-42850628_G_T   | NA      | Substitution | Splice site acceptor | 17% |
| MM04T | ADAM21   | ADAM metallopeptidase domain 21                            | CCDS9804.1      | chr14_70925053-70925053_C_A   | 279F>L  | Substitution | Nonsynonymous coding | 27% |
| MM04T | ADAM21   | ADAM metallopeptidase domain 21                            | CCDS9804.1      | chr14_70926127-70926127_G_T   | 637E>D  | Substitution | Nonsynonymous coding | 29% |
| MM04T | ADAM23   | ADAM metallopeptidase domain 23                            | CCDS2369.1      | chr2_207457355-207457355_G_T  | 658G>V  | Substitution | Nonsynonymous coding | 24% |
| MM04T | ADAM23   | ADAM metallopeptidase domain 23                            | CCDS2369.1      | chr2_207310045-207310045_G_T  | 77E>X   | Substitution | Nonsense             | 32% |
| MM04T | ADAM23   | ADAM metallopeptidase domain 23                            | CCDS2369.1      | chr2_207454177-207454177_G_T  | 633E>X  | Substitution | Nonsense             | 24% |
| MM04T | ADAM28   | ADAM metallopeptidase domain 28                            | CCDS34865.1     | chr8_24171006-24171006_G_T    | 163K>N  | Substitution | Nonsynonymous coding | 27% |
| MM04T | ADAM30   | ADAM metallopeptidase domain 30                            | CCDS907.1       | chr1_120437861-120437861_G_A  | 367R>C  | Substitution | Nonsynonymous coding | 26% |
| MM04T | ADAM33   | ADAM metallopeptidase domain 33                            | CCDS13058.1     | chr20_3649960-3649960_G_A     | 797S>L  | Substitution | Nonsynonymous coding | 33% |
| MM04T | ADAM7    | ADAM metallopeptidase domain 7                             | CCDS6045.1      | chr8_24323239-24323239_G_A    | 114V>I  | Substitution | Nonsynonymous coding | 18% |
| MM04T | ADAM7    | ADAM metallopeptidase domain 7                             | CCDS6045.1      | chr8_24344778-24344778_G_A    | 347E>K  | Substitution | Nonsynonymous coding | 26% |
| MM04T | ADAM9    | ADAM metallopeptidase domain 9                             | CCDS6112.1      | chr8_38880697-38880697_G_A    | 256R>Q  | Substitution | Nonsynonymous coding | 26% |
| MM04T | ADAMTS1  | ADAM metallopeptidase with thrombospondin type 1 motif, 1  | ENST00000451462 | chr21_28215837-28215837_C_    | NA      | Deletion     | Frameshift           | 67% |
| MM04T | ADAMTS1  | ADAM metallopeptidase with thrombospondin type 1 motif, 1  | CCDS33524.1     | chr21_28214672-28214672_G_T   | 355L>I  | Substitution | Nonsynonymous coding | 41% |
| MM04T | ADAMTS12 | ADAM metallopeptidase with thrombospondin type 1 motif, 12 | CCDS34140.1     | chr5_33549455-33549455_G_A    | 1387R>C | Substitution | Nonsynonymous coding | 30% |
| MM04T | ADAMTS16 | ADAM metallopeptidase with thrombospondin type 1 motif, 16 | CCDS43299.1     | chr5_5200357-5200357_C_T      | 476R>C  | Substitution | Nonsynonymous coding | 46% |
| MM04T | ADAMTS16 | ADAM metallopeptidase with thrombospondin type 1 motif, 16 | CCDS43299.1     | chr5_5262767-5262767_C_T      | NA      | Substitution | Splice site acceptor | 32% |
| MM04T | ADAMTS17 | ADAM metallopeptidase with thrombospondin type 1 motif, 17 | CCDS10383.1     | chr15_100533269-100533269_G_T | 978T>N  | Substitution | Nonsynonymous coding | 34% |
| MM04T | ADAMTS19 | ADAM metallopeptidase with thrombospondin type 1 motif, 19 | CCDS4146.1      | chr5_128983569-128983569_C_T  | 656R>X  | Substitution | Nonsense             | 41% |
| MM04T | ADAMTS2  | ADAM metallopeptidase with thrombospondin type 1 motif, 2  | CCDS4444.1      | chr5_178541020-178541020_C_A  | 1162D>Y | Substitution | Nonsynonymous coding | 22% |
| MM04T | ADAMTS20 | ADAM metallopeptidase with thrombospondin type 1 motif, 20 | ENST00000389420 | chr12_43896022-43896022_G_A   | 267A>V  | Substitution | Nonsynonymous coding | 26% |
| MM04T | ADAMTS3  | ADAM metallopeptidase with thrombospondin type 1 motif, 3  | CCDS3553.1      | chr4_73434457-73434457_A_G    | 8L>S    | Substitution | Nonsynonymous coding | 33% |
| MM04T | ADAMTS4  | ADAM metallopeptidase with thrombospondin type 1 motif, 4  | CCDS1223.1      | chr1_161160960-161160960_G_T  | 828L>I  | Substitution | Nonsynonymous coding | 21% |
| MM04T | ADAMTS5  | ADAM metallopeptidase with thrombospondin type 1 motif, 5  | CCDS13579.1     | chr21_28306867-28306867_G_A   | 536A>V  | Substitution | Nonsynonymous coding | 22% |
| MM04T | ADAMTS7  | ADAM metallopeptidase with thrombospondin type 1 motif, 7  | CCDS32303.1     | chr15_79092842-79092842_G_A   | 50R>X   | Substitution | Nonsense             | 30% |
| MM04T | ADAMTS9  | ADAM metallopeptidase with thrombospondin type 1 motif, 9  | CCDS2903.1      | chr3_64606845-64606845_G_A    | 920R>W  | Substitution | Nonsynonymous coding | 26% |
| MM04T | ADAMTSL2 | ADAMTS-like 2                                              | CCDS6976.1      | chr9_136420724-136420724_G_A  | 441E>K  | Substitution | Nonsynonymous coding | 33% |

|       |          |                                                           |             |                               |         |              |                      |     |
|-------|----------|-----------------------------------------------------------|-------------|-------------------------------|---------|--------------|----------------------|-----|
| MM04T | ADAMTSL2 | ADAMTS-like 2                                             | CCDS6976.1  | chr9_136435468-136435468_G_T  | 811G>W  | Substitution | Nonsynonymous coding | 23% |
| MM04T | ADAMTSL3 | ADAMTS-like 3                                             | CCDS10326.1 | chr15_84473406-84473406_T_G   | 108C>G  | Substitution | Nonsynonymous coding | 33% |
| MM04T | ADAMTSL3 | ADAMTS-like 3                                             | CCDS10326.1 | chr15_84705628-84705628_C_T   | 1620R>W | Substitution | Nonsynonymous coding | 20% |
| MM04T | ADAMTSL4 | ADAMTS-like 4                                             | CCDS955.1   | chr1_150526447-150526447_G_A  | 327R>H  | Substitution | Nonsynonymous coding | 36% |
| MM04T | ADARB1   | adenosine deaminase, RNA-specific, B1                     | CCDS33589.1 | chr21_46604882-46604882_C_T   | 521R>W  | Substitution | Nonsynonymous coding | 23% |
| MM04T | ADC      | arginine decarboxylase                                    | CCDS375.1   | chr1_33560255-33560255_G_A    | 232V>I  | Substitution | Nonsynonymous coding | 32% |
| MM04T | ADCY1    | adenylate cyclase 1 (brain)                               | CCDS34631.1 | chr7_45743334-45743334_G_A    | 903D>N  | Substitution | Nonsynonymous coding | 35% |
| MM04T | ADCY1    | adenylate cyclase 1 (brain)                               | CCDS34631.1 | chr7_45750169-45750169_G_A    | 992R>H  | Substitution | Nonsynonymous coding | 27% |
| MM04T | ADCY10   | adenylate cyclase 10 (soluble)                            | CCDS1265.1  | chr1_167815331-167815331_A_C  | 870F>V  | Substitution | Nonsynonymous coding | 35% |
| MM04T | ADCY2    | adenylate cyclase 2 (brain)                               | CCDS3872.2  | chr5_7727357-7727357_G_T      | 618Q>H  | Substitution | Nonsynonymous coding | 28% |
| MM04T | ADCY2    | adenylate cyclase 2 (brain)                               | CCDS3872.2  | chr5_7709330-7709330_C_T      | 470R>X  | Substitution | Nonsense             | 43% |
| MM04T | ADCY9    | adenylate cyclase 9                                       | CCDS32382.1 | chr16_4016512-4016512_G_A     | 1109T>I | Substitution | Nonsynonymous coding | 23% |
| MM04T | ADCY9    | adenylate cyclase 9                                       | CCDS32382.1 | chr16_4164654-4164654_G_A     | 264R>W  | Substitution | Nonsynonymous coding | 29% |
| MM04T | ADCYAP1  | adenylate cyclase activating polypeptide 1 (pituitary)    | CCDS11825.1 | chr18_907673-907673_G_A       | 42A>T   | Substitution | Nonsynonymous coding | 20% |
| MM04T | ADCYAP1  | adenylate cyclase activating polypeptide 1 (pituitary)    | CCDS11825.1 | chr18_908267-908267_G_T       | 82D>Y   | Substitution | Nonsynonymous coding | 33% |
| MM04T | ADD2     | adducin 2 (beta)                                          | CCDS1906.1  | chr2_70901826-70901826_C_A    | 575K>N  | Substitution | Nonsynonymous coding | 15% |
| MM04T | ADD3     | adducin 3 (gamma)                                         | CCDS7561.1  | chr10_111890220-111890220_G_A | 570E>K  | Substitution | Nonsynonymous coding | 30% |
| MM04T | ADD3     | adducin 3 (gamma)                                         | CCDS7561.1  | chr10_111893230-111893230_G_A | 659E>K  | Substitution | Nonsynonymous coding | 30% |
| MM04T | ADK      | adenosine kinase                                          | CCDS7343.1  | chr10_76468130-76468130_C_T   | 339A>V  | Substitution | Nonsynonymous coding | 29% |
| MM04T | ADM      | adrenomedullin                                            | CCDS7801.1  | chr11_10327276-10327276_A_G   | 10Y>C   | Substitution | Nonsynonymous coding | 31% |
| MM04T | ADNP     | activity-dependent neuroprotector homeobox                | CCDS13433.1 | chr20_49510935-49510935_G_T   | 106L>I  | Substitution | Nonsynonymous coding | 28% |
| MM04T | AFF2     | AF4/FMR2 family, member 2                                 | CCDS14684.1 | chrX_147743630-147743630_G_A  | 128D>N  | Substitution | Nonsynonymous coding | 33% |
| MM04T | AFF2     | AF4/FMR2 family, member 2                                 | CCDS14684.1 | chrX_148044284-148044284_A_C  | 910E>D  | Substitution | Nonsynonymous coding | 28% |
| MM04T | AFG3L2   | AFG3 ATPase family member 3-like 2 (S. cerevisiae)        | CCDS11859.1 | chr18_12370869-12370869_C_A   | 91E>X   | Substitution | Nonsense             | 32% |
| MM04T | AFP      | alpha-fetoprotein                                         | CCDS3556.1  | chr4_74315801-74315801_C_T    | 414R>X  | Substitution | Nonsense             | 15% |
| MM04T | AFTPH    | aftiphilin                                                | CCDS46303.1 | chr2_64779333-64779333_G_T    | 242R>M  | Substitution | Nonsynonymous coding | 24% |
| MM04T | AFTPH    | aftiphilin                                                | CCDS46303.1 | chr2_64779656-64779656_G_T    | 350E>X  | Substitution | Nonsense             | 32% |
| MM04T | AGA      | aspartylglucosaminidase                                   | CCDS3829.1  | chr4_178354449-178354449_G_T  | 287Q>K  | Substitution | Nonsynonymous coding | 25% |
| MM04T | AGA      | aspartylglucosaminidase                                   | CCDS3829.1  | chr4_178355645-178355645_T_G  | NA      | Substitution | Splice site acceptor | 24% |
| MM04T | AGAP2    | ArfGAP with GTPase domain, ankyrin repeat and PH domain 2 | CCDS44932.1 | chr12_58122118-58122118_C_A   | 867R>I  | Substitution | Nonsynonymous coding | 28% |
| MM04T | AGBL1    | ATP/GTP binding protein-like 1                            | NM_152336   | chr15_86822869-86822869_G_T   | NA      | Substitution | Splice site acceptor | 39% |
| MM04T | AGBL2    | ATP/GTP binding protein-like 2                            | CCDS7944.1  | chr11_47711667-47711667_G_T   | 531S>Y  | Substitution | Nonsynonymous coding | 18% |

|       |        |                                                       |                 |                               |         |              |                      |     |
|-------|--------|-------------------------------------------------------|-----------------|-------------------------------|---------|--------------|----------------------|-----|
| MM04T | AGBL3  | ATP/GTP binding protein-like 3                        | CCDS47718.1     | chr7_134719115-134719115_G_T  | 258R>I  | Substitution | Nonsynonymous coding | 22% |
| MM04T | AGBL4  | ATP/GTP binding protein-like 4                        | ENST00000334103 | chr1_48999797-48999797_G_T    | 300L>M  | Substitution | Nonsynonymous coding | 28% |
| MM04T | AGBL4  | ATP/GTP binding protein-like 4                        | CCDS44137.1     | chr1_49100271-49100271_G_T    | 282S>Y  | Substitution | Nonsynonymous coding | 21% |
| MM04T | AGGF1  | angiogenic factor with G patch and FHA domains 1      | CCDS4035.1      | chr5_76330277-76330277_G_T    | 82R>I   | Substitution | Nonsynonymous coding | 33% |
| MM04T | AGL    | amylase-1, 6-glycosidase, 4-alpha-glucanotransferase  | CCDS759.1       | chr1_100357161-100357161_G_T  | NA      | Substitution | Splice site acceptor | 26% |
| MM04T | AGMO   | alkylglycerol monoxygenase                            | CCDS34604.1     | chr7_15425072-15425072_G_A    | 358A>V  | Substitution | Nonsynonymous coding | 33% |
| MM04T | AGMO   | alkylglycerol monoxygenase                            | CCDS34604.1     | chr7_15427047-15427047_C_A    | 314S>I  | Substitution | Nonsynonymous coding | 30% |
| MM04T | AGPAT6 | 1-acylglycerol-3-phosphate O-acyltransferase 6        | CCDS6117.1      | chr8_41471931-41471931_G_A    | 313S>N  | Substitution | Nonsynonymous coding | 21% |
| MM04T | AGPAT9 | 1-acylglycerol-3-phosphate O-acyltransferase 9        | CCDS3606.1      | chr4_84457914-84457914_G_T    | 47E>X   | Substitution | Nonsense             | 30% |
| MM04T | AGPHD1 | aminoglycoside phosphotransferase domain containing 1 | CCDS42063.1     | chr15_78805569-78805569_A_C   | 47N>H   | Substitution | Nonsynonymous coding | 35% |
| MM04T | AGPHD1 | aminoglycoside phosphotransferase domain containing 1 | CCDS42063.1     | chr15_78819794-78819794_C_A   | 184L>M  | Substitution | Nonsynonymous coding | 26% |
| MM04T | AGPS   | alkylglycerone phosphate synthase                     | CCDS2275.1      | chr2_178301722-178301722_G_T  | 193E>X  | Substitution | Nonsense             | 21% |
| MM04T | AGPS   | alkylglycerone phosphate synthase                     | CCDS2275.1      | chr2_178402921-178402921_T_C  | 659*>Q  | Substitution | Nonsynonymous coding | 29% |
| MM04T | AGR2   | anterior gradient 2 homolog (Xenopus laevis)          | CCDS5364.1      | chr7_16841311-16841311_C_A    | 37R>L   | Substitution | Nonsynonymous coding | 34% |
| MM04T | AHCTF1 | AT hook containing transcription factor 1             | CCDS1629.1      | chr1_247027341-247027341_G_T  | 1142S>Y | Substitution | Nonsynonymous coding | 33% |
| MM04T | AHCYL1 | adenosylhomocysteinase-like 1                         | CCDS818.1       | chr1_110561025-110561025_T_C  | 385L>S  | Substitution | Nonsynonymous coding | 26% |
| MM04T | AHCYL1 | adenosylhomocysteinase-like 1                         | CCDS818.1       | chr1_110561030-110561030_C_T  | 387R>C  | Substitution | Nonsynonymous coding | 35% |
| MM04T | AHI1   | Abelson helper integration site 1                     | CCDS47483.1     | chr6_135787208-135787208_C_T  | 165V>I  | Substitution | Nonsynonymous coding | 24% |
| MM04T | AHI1   | Abelson helper integration site 1                     | CCDS47483.1     | chr6_135788719-135788719_A_C  | 63D>E   | Substitution | Nonsynonymous coding | 24% |
| MM04T | AHI1   | Abelson helper integration site 1                     | CCDS47483.1     | chr6_135787142-135787142_C_A  | 187E>X  | Substitution | Nonsense             | 19% |
| MM04T | AHNAK  | AHNAK nucleoprotein                                   | CCDS31584.1     | chr11_62294055-62294055_C_T   | 2612E>K | Substitution | Nonsynonymous coding | 20% |
| MM04T | AHNAK  | AHNAK nucleoprotein                                   | CCDS31584.1     | chr11_62294871-62294871_C_T   | 2340E>K | Substitution | Nonsynonymous coding | 28% |
| MM04T | AHNAK  | AHNAK nucleoprotein                                   | CCDS31584.1     | chr11_62299764-62299764_T_C   | 709T>A  | Substitution | Nonsynonymous coding | 22% |
| MM04T | AHNAK2 | AHNAK nucleoprotein 2                                 | CCDS45177.1     | chr14_105407866-105407866_G_A | 4641S>L | Substitution | Nonsynonymous coding | 38% |
| MM04T | AHNAK2 | AHNAK nucleoprotein 2                                 | CCDS45177.1     | chr14_105420551-105420551_C_T | 413G>R  | Substitution | Nonsynonymous coding | 32% |
| MM04T | AIF1   | allograft inflammatory factor 1                       | CCDS4706.1      | chr6_31584265-31584265_G_T    | 114R>I  | Substitution | Nonsynonymous coding | 23% |
| MM04T | AK7    | adenylate kinase 7                                    | CCDS9945.1      | chr14_96875248-96875248_G_T   | 156M>I  | Substitution | Nonsynonymous coding | 28% |
| MM04T | AKAP10 | A kinase (PRKA) anchor protein 10                     | CCDS11214.1     | chr17_19835222-19835222_G_A   | 513R>X  | Substitution | Nonsense             | 23% |
| MM04T | AKAP11 | A kinase (PRKA) anchor protein 11                     | CCDS9383.1      | chr13_42875829-42875829_G_T   | 983E>X  | Substitution | Nonsense             | 21% |
| MM04T | AKAP12 | A kinase (PRKA) anchor protein 12                     | CCDS5229.1      | chr6_151670744-151670744_G_T  | 406E>D  | Substitution | Nonsynonymous coding | 33% |
| MM04T | AKAP4  | A kinase (PRKA) anchor protein 4                      | CCDS14329.1     | chrX_49958792-49958792_G_T    | 191P>H  | Substitution | Nonsynonymous coding | 19% |
| MM04T | AKAP6  | A kinase (PRKA) anchor protein 6                      | CCDS9644.1      | chr14_33290957-33290957_G_A   | 1313G>D | Substitution | Nonsynonymous coding | 35% |

|       |            |                                                                                          |                 |                               |         |              |                      |     |
|-------|------------|------------------------------------------------------------------------------------------|-----------------|-------------------------------|---------|--------------|----------------------|-----|
| MM04T | AKAP9      | A kinase (PRKA) anchor protein (yotiao) 9                                                | CCDS5622.1      | chr7_91631177-91631177_G_A    | 649R>Q  | Substitution | Nonsynonymous coding | 26% |
| MM04T | AKAP9      | A kinase (PRKA) anchor protein (yotiao) 9                                                | CCDS5622.1      | chr7_91632512-91632512_A_C    | 1094K>T | Substitution | Nonsynonymous coding | 31% |
| MM04T | AKAP9      | A kinase (PRKA) anchor protein (yotiao) 9                                                | CCDS5622.1      | chr7_91712715-91712715_C_A    | 2798L>I | Substitution | Nonsynonymous coding | 38% |
| MM04T | AKAP9      | A kinase (PRKA) anchor protein (yotiao) 9                                                | CCDS5622.1      | chr7_91631377-91631377_G_T    | 716E>X  | Substitution | Nonsense             | 37% |
| MM04T | AKD1       | adenylate kinase domain containing 1                                                     | CCDS5077.1      | chr6_109965891-109965891_C_A  | 254E>X  | Substitution | Nonsense             | 21% |
| MM04T | AKNAD1     | AKNA domain containing 1                                                                 | CCDS791.2       | chr1_109392165-109392165_G_A  | 343L>F  | Substitution | Nonsynonymous coding | 24% |
| MM04T | AKR1B15    | aldo-keto reductase family 1, member B15                                                 | CCDS47715.1     | chr7_134253038-134253038_G_T  | 65E>D   | Substitution | Nonsynonymous coding | 23% |
| MM04T | AKR1B15    | aldo-keto reductase family 1, member B15                                                 | CCDS47715.1     | chr7_134261167-134261167_A_C  | 242K>N  | Substitution | Nonsynonymous coding | 20% |
| MM04T | AL450307.1 | Uncharacterized protein; cDNA FLJ46300 fis, clone TEST14035989                           | ENST00000341866 | chr10_133608082-133608082_C_A | 98E>D   | Substitution | Nonsynonymous coding | 36% |
| MM04T | ALB        | albumin                                                                                  | CCDS3555.1      | chr4_74275129-74275129_C_A    | 180F>L  | Substitution | Nonsynonymous coding | 35% |
| MM04T | ALCAM      | activated leukocyte cell adhesion molecule                                               | CCDS33810.1     | chr3_105266008-105266008_C_T  | 374R>X  | Substitution | Nonsense             | 12% |
| MM04T | ALDH18A1   | aldehyde dehydrogenase 18 family, member A1                                              | CCDS7443.1      | chr10_97366673-97366673_C_A   | 745R>I  | Substitution | Nonsynonymous coding | 46% |
| MM04T | ALDH1L1    | aldehyde dehydrogenase 1 family, member L1                                               | CCDS3034.1      | chr3_125877329-125877329_A_C  | 94I>R   | Substitution | Nonsynonymous coding | 10% |
| MM04T | ALDH2      | aldehyde dehydrogenase 2 family (mitochondrial)                                          | CCDS9155.1      | chr12_112229223-112229223_G_T | 265E>D  | Substitution | Nonsynonymous coding | 22% |
| MM04T | ALDH3B1    | aldehyde dehydrogenase 3 family, member B1                                               | ENST0000007633  | chr11_67795258-67795258_G_A   | 418D>N  | Substitution | Nonsynonymous coding | 28% |
| MM04T | ALG11      | asparagine-linked glycosylation 11, alpha-1,2-mannosyltransferase homolog (yeast)        | CCDS31977.1     | chr13_52598341-52598341_C_A   | 159L>I  | Substitution | Nonsynonymous coding | 23% |
| MM04T | ALG13      | asparagine-linked glycosylation 13 homolog (S. cerevisiae)                               | CCDS14559.1     | chrX_110925504-110925504_C_A  | 76L>I   | Substitution | Nonsynonymous coding | 15% |
| MM04T | ALG2       | asparagine-linked glycosylation 2, alpha-1,3-mannosyltransferase homolog (S. cerevisiae) | CCDS6739.1      | chr9_101980242-101980242_G_A  | 409R>X  | Substitution | Nonsense             | 18% |
| MM04T | ALG8       | asparagine-linked glycosylation 8, alpha-1,3-glucosyltransferase homolog (S. cerevisiae) | CCDS8258.1      | chr11_77838456-77838456_C_T   | 41R>Q   | Substitution | Nonsynonymous coding | 18% |
| MM04T | ALK        | anaplastic lymphoma receptor tyrosine kinase                                             | CCDS33172.1     | chr2_29462691-29462691_G_A    | 737S>L  | Substitution | Nonsynonymous coding | 26% |
| MM04T | ALK        | anaplastic lymphoma receptor tyrosine kinase                                             | CCDS33172.1     | chr2_29519902-29519902_G_A    | 557R>C  | Substitution | Nonsynonymous coding | 21% |
| MM04T | ALK        | anaplastic lymphoma receptor tyrosine kinase                                             | CCDS33172.1     | chr2_29606679-29606679_G_A    | 401R>X  | Substitution | Nonsense             | 26% |
| MM04T | ALMS1      | Alstrom syndrome 1                                                                       | CCDS42697.1     | chr2_73676961-73676961_C_T    | 1102P>S | Substitution | Nonsynonymous coding | 33% |
| MM04T | ALMS1      | Alstrom syndrome 1                                                                       | CCDS42697.1     | chr2_73677211-73677211_G_T    | 1185R>I | Substitution | Nonsynonymous coding | 24% |
| MM04T | ALMS1      | Alstrom syndrome 1                                                                       | CCDS42697.1     | chr2_73827843-73827843_C_T    | 3902R>X | Substitution | Nonsense             | 21% |
| MM04T | ALOX12B    | arachidonate 12-lipoxygenase, 12R type                                                   | CCDS11129.1     | chr17_7983190-7983190_C_T     | 275G>D  | Substitution | Nonsynonymous coding | 35% |
| MM04T | ALOX12B    | arachidonate 12-lipoxygenase, 12R type                                                   | CCDS11129.1     | chr17_7983596-7983596_C_A     | 237K>N  | Substitution | Nonsynonymous coding | 18% |
| MM04T | ALOX15     | arachidonate 15-lipoxygenase                                                             | CCDS11049.1     | chr17_4536765-4536765_C_A     | 398E>X  | Substitution | Nonsense             | 22% |
| MM04T | ALOX15B    | arachidonate 15-lipoxygenase, type B                                                     | CCDS11128.1     | chr17_7948570-7948570_C_A     | 288F>L  | Substitution | Nonsynonymous coding | 27% |
| MM04T | ALOXE3     | arachidonate lipoxygenase 3                                                              | CCDS11130.1     | chr17_8020099-8020099_C_A     | 116G>V  | Substitution | Nonsynonymous coding | 31% |
| MM04T | ALPI       | alkaline phosphatase, intestinal                                                         | CCDS2492.1      | chr2_23321109-23321109_G_A    | 40D>N   | Substitution | Nonsynonymous coding | 24% |
| MM04T | ALPK1      | alpha-kinase 1                                                                           | CCDS3697.1      | chr4_113352627-113352627_C_T  | 642H>Y  | Substitution | Nonsynonymous coding | 33% |

|       |          |                                                                            |              |                              |         |              |                      |     |
|-------|----------|----------------------------------------------------------------------------|--------------|------------------------------|---------|--------------|----------------------|-----|
| MM04T | ALPK1    | alpha-kinase 1                                                             | CCDS3697.1   | chr4_113353573-113353573_C_A | 957S>Y  | Substitution | Nonsynonymous coding | 25% |
| MM04T | ALPK1    | alpha-kinase 1                                                             | CCDS3697.1   | chr4_113353640-113353640_C_A | 979D>E  | Substitution | Nonsynonymous coding | 29% |
| MM04T | ALPK1    | alpha-kinase 1                                                             | CCDS3697.1   | chr4_113353005-113353005_G_T | 768E>X  | Substitution | Nonsense             | 21% |
| MM04T | ALPK2    | alpha-kinase 2                                                             | CCDS11966.2  | chr18_56196378-56196378_C_A  | 1816D>Y | Substitution | Nonsynonymous coding | 20% |
| MM04T | ALPK2    | alpha-kinase 2                                                             | CCDS11966.2  | chr18_56203470-56203470_C_T  | 1317E>K | Substitution | Nonsynonymous coding | 30% |
| MM04T | ALPK2    | alpha-kinase 2                                                             | CCDS11966.2  | chr18_56247745-56247745_G_A  | 88S>L   | Substitution | Nonsynonymous coding | 11% |
| MM04T | ALPK2    | alpha-kinase 2                                                             | CCDS11966.2  | chr18_56274592-56274592_G_T  | 63F>L   | Substitution | Nonsynonymous coding | 34% |
| MM04T | ALPK2    | alpha-kinase 2                                                             | CCDS11966.2  | chr18_56274605-56274605_G_A  | 59S>F   | Substitution | Nonsynonymous coding | 32% |
| MM04T | ALS2CL   | ALS2 C-terminal like                                                       | CCDS2743.1   | chr3_46713452-46713452_G_A   | 869S>L  | Substitution | Nonsynonymous coding | 22% |
| MM04T | ALS2CL   | ALS2 C-terminal like                                                       | CCDS2743.1   | chr3_46716212-46716212_C_T   | 758G>E  | Substitution | Nonsynonymous coding | 25% |
| MM04T | ALS2CR11 | amyotrophic lateral sclerosis 2 (juvenile) chromosome region, candidate 11 | NM_001168221 | chr2_202357247-202357247_A_G | 1273S>P | Substitution | Nonsynonymous coding | 34% |
| MM04T | ALS2CR11 | amyotrophic lateral sclerosis 2 (juvenile) chromosome region, candidate 11 | NM_001168221 | chr2_202358557-202358557_T_G | 836K>T  | Substitution | Nonsynonymous coding | 36% |
| MM04T | ALS2CR12 | amyotrophic lateral sclerosis 2 (juvenile) chromosome region, candidate 12 | CCDS2346.1   | chr2_202153498-202153498_C_A | 406K>N  | Substitution | Nonsynonymous coding | 23% |
| MM04T | ALS2CR8  | amyotrophic lateral sclerosis 2 (juvenile) chromosome region, candidate 8  | CCDS42801.1  | chr2_203807573-203807573_A_G | 63I>M   | Substitution | Nonsynonymous coding | 33% |
| MM04T | ALS2CR8  | amyotrophic lateral sclerosis 2 (juvenile) chromosome region, candidate 8  | CCDS42801.1  | chr2_203836336-203836336_G_T | 402E>D  | Substitution | Nonsynonymous coding | 27% |
| MM04T | ALS2CR8  | amyotrophic lateral sclerosis 2 (juvenile) chromosome region, candidate 8  | CCDS42801.1  | chr2_203847017-203847017_C_T | 638P>S  | Substitution | Nonsynonymous coding | 31% |
| MM04T | AMBP     | alpha-1-microglobulin/bikunin precursor                                    | CCDS6800.1   | chr9_116837291-116837291_C_A | 96G>X   | Substitution | Nonsense             | 27% |
| MM04T | AMER1    | APC membrane recruitment protein 1                                         | CCDS14377.2  | chrX_63410967-63410967_C_A   | 734E>X  | Substitution | Nonsense             | 31% |
| MM04T | AMFR     | autocrine motility factor receptor, E3 ubiquitin protein ligase            | CCDS10758.1  | chr16_56448253-56448253_G_T  | 87L>I   | Substitution | Nonsynonymous coding | 28% |
| MM04T | AMOT     | angiominin                                                                 | CCDS48154.1  | chrX_112048234-112048234_C_T | 573E>K  | Substitution | Nonsynonymous coding | 21% |
| MM04T | AMPD1    | adenosine monophosphate deaminase 1                                        | CCDS876.1    | chr1_115218215-115218215_G_A | 539P>S  | Substitution | Nonsynonymous coding | 32% |
| MM04T | AMPD1    | adenosine monophosphate deaminase 1                                        | CCDS876.1    | chr1_115218573-115218573_C_A | 480E>D  | Substitution | Nonsynonymous coding | 19% |
| MM04T | AMPD1    | adenosine monophosphate deaminase 1                                        | CCDS876.1    | chr1_115223060-115223060_C_T | 196R>Q  | Substitution | Nonsynonymous coding | 24% |
| MM04T | AMPH     | amphiphysin                                                                | CCDS5456.1   | chr7_38433781-38433781_C_A   | 478G>X  | Substitution | Nonsense             | 17% |
| MM04T | AMPH     | amphiphysin                                                                | CCDS5456.1   | chr7_38500909-38500909_C_A   | 331E>X  | Substitution | Nonsense             | 44% |
| MM04T | ANAPC4   | anaphase promoting complex subunit 4                                       | CCDS3434.1   | chr4_25391786-25391786_T_G   | 182S>A  | Substitution | Nonsynonymous coding | 28% |
| MM04T | ANAPC4   | anaphase promoting complex subunit 4                                       | CCDS3434.1   | chr4_25398299-25398299_T_G   | 359L>V  | Substitution | Nonsynonymous coding | 31% |
| MM04T | ANAPC4   | anaphase promoting complex subunit 4                                       | CCDS3434.1   | chr4_25417118-25417118_A_C   | 619K>N  | Substitution | Nonsynonymous coding | 43% |
| MM04T | ANGEL1   | angel homolog 1 (Drosophila)                                               | CCDS9852.1   | chr14_77257038-77257038_C_T  | 590V>I  | Substitution | Nonsynonymous coding | 37% |
| MM04T | ANGPT1   | angiotensinogen 1                                                          | CCDS6306.1   | chr8_108348421-108348421_G_T | 178L>I  | Substitution | Nonsynonymous coding | 33% |
| MM04T | ANGPT2   | angiotensinogen 2                                                          | CCDS5958.1   | chr8_6420442-6420442_A_G     | 5V>A    | Substitution | Nonsynonymous coding | 24% |
| MM04T | ANGPT2   | angiotensinogen 2                                                          | CCDS5958.1   | chr8_6389975-6389975_C_A     | 108E>X  | Substitution | Nonsense             | 28% |

|       |          |                                                             |                 |                               |         |              |                      |     |
|-------|----------|-------------------------------------------------------------|-----------------|-------------------------------|---------|--------------|----------------------|-----|
| MM04T | ANGPTL3  | angiotensin-like 3                                          | CCDS622.1       | chr1_63063272-63063272_C_A    | 12P>H   | Substitution | Nonsynonymous coding | 39% |
| MM04T | ANGPTL5  | angiotensin-like 5                                          | CCDS8312.1      | chr11_101762130-101762130_G_T | 349F>L  | Substitution | Nonsynonymous coding | 25% |
| MM04T | ANK1     | ankyrin 1, erythrocytic                                     | CCDS47849.1     | chr8_41580710-41580710_C_T    | 314R>Q  | Substitution | Nonsynonymous coding | 32% |
| MM04T | ANK2     | ankyrin 2, neuronal                                         | CCDS3702.1      | chr4_114179506-114179506_G_A  | 442G>D  | Substitution | Nonsynonymous coding | 40% |
| MM04T | ANK3     | ankyrin 3, node of Ranvier (ankyrin G)                      | CCDS7258.1      | chr10_61831496-61831496_G_T   | 3048S>Y | Substitution | Nonsynonymous coding | 10% |
| MM04T | ANK3     | ankyrin 3, node of Ranvier (ankyrin G)                      | CCDS7258.1      | chr10_61832853-61832853_G_A   | 2596R>C | Substitution | Nonsynonymous coding | 31% |
| MM04T | ANK3     | ankyrin 3, node of Ranvier (ankyrin G)                      | CCDS7258.1      | chr10_61834592-61834592_A_G   | 2016V>A | Substitution | Nonsynonymous coding | 29% |
| MM04T | ANKEF1   | ankyrin repeat and EF-hand domain containing 1              | CCDS13108.1     | chr20_10019079-10019079_G_A   | 44E>K   | Substitution | Nonsynonymous coding | 32% |
| MM04T | ANKHD1   | ankyrin repeat and KH domain containing 1                   | CCDS4224.1      | chr5_139820697-139820697_G_T  | 295D>Y  | Substitution | Nonsynonymous coding | 22% |
| MM04T | ANKHD1   | ankyrin repeat and KH domain containing 1                   | CCDS4224.1      | chr5_139928586-139928586_G_A  | 2592G>D | Substitution | Nonsynonymous coding | 40% |
| MM04T | ANKIB1   | ankyrin repeat and IBR domain containing 1                  | CCDS47639.1     | chr7_91924386-91924386_G_T    | 32E>X   | Substitution | Nonsense             | 28% |
| MM04T | ANKK1    | ankyrin repeat and kinase domain containing 1               | CCDS44734.1     | chr11_113265784-113265784_C_A | 205P>H  | Substitution | Nonsynonymous coding | 16% |
| MM04T | ANKRA2   | ankyrin repeat, family A (RFXANK-like), 2                   | CCDS4020.1      | chr5_72849278-72849278_G_T    | 280S>Y  | Substitution | Nonsynonymous coding | 21% |
| MM04T | ANKRD10  | ankyrin repeat domain 10                                    | CCDS9520.1      | chr13_111545432-111545432_G_A | 212R>X  | Substitution | Nonsense             | 35% |
| MM04T | ANKRD12  | ankyrin repeat domain 12                                    | CCDS11843.1     | chr18_9255009-9255009_C_T     | 582R>W  | Substitution | Nonsynonymous coding | 21% |
| MM04T | ANKRD13A | ankyrin repeat domain 13A                                   | CCDS9140.1      | chr12_110471652-110471652_G_A | 467E>K  | Substitution | Nonsynonymous coding | 21% |
| MM04T | ANKRD17  | ankyrin repeat domain 17                                    | CCDS34004.1     | chr4_73957361-73957361_C_T    | 1995R>Q | Substitution | Nonsynonymous coding | 34% |
| MM04T | ANKRD26  | ankyrin repeat domain 26                                    | CCDS41499.1     | chr10_27324195-27324195_G_T   | 1062L>I | Substitution | Nonsynonymous coding | 36% |
| MM04T | ANKRD28  | ankyrin repeat domain 28                                    | CCDS46769.1     | chr3_15755107-15755107_A_C    | 343L>V  | Substitution | Nonsynonymous coding | 34% |
| MM04T | ANKRD30B | ankyrin repeat domain 30B                                   | NM_001145029    | chr18_14748527-14748527_G_A   | 37G>R   | Substitution | Nonsynonymous coding | 19% |
| MM04T | ANKRD32  | ankyrin repeat domain 32                                    | CCDS4071.2      | chr5_94031013-94031013_C_A    | 1058S>X | Substitution | Nonsense             | 29% |
| MM04T | ANKRD33  | ankyrin repeat domain 33                                    | CCDS8815.1      | chr12_52284460-52284460_C_T   | 244R>W  | Substitution | Nonsynonymous coding | 34% |
| MM04T | ANKRD33B | ankyrin repeat domain 33B                                   | CCDS47191.1     | chr5_10638200-10638200_G_T    | 186R>M  | Substitution | Nonsynonymous coding | 20% |
| MM04T | ANKRD34B | ankyrin repeat domain 34B                                   | CCDS34194.1     | chr5_79855217-79855217_G_C    | 208L>V  | Substitution | Nonsynonymous coding | 31% |
| MM04T | ANKRD42  | ankyrin repeat domain 42                                    | ENST00000260047 | chr11_82956623-82956623_G_T   | 691E>X  | Substitution | Nonsense             | 16% |
| MM04T | ANKRD44  | ankyrin repeat domain 44                                    | CCDS33355.1     | chr2_197863678-197863678_T_G  | 848K>T  | Substitution | Nonsynonymous coding | 29% |
| MM04T | ANKRD50  | ankyrin repeat domain 50                                    | CCDS34060.1     | chr4_125591857-125591857_G_A  | 859H>Y  | Substitution | Nonsynonymous coding | 32% |
| MM04T | ANKS1B   | ankyrin repeat and sterile alpha motif domain containing 1B | NM_152788       | chr12_99145258-99145258_C_T   | 1183E>K | Substitution | Nonsynonymous coding | 27% |
| MM04T | ANKS1B   | ankyrin repeat and sterile alpha motif domain containing 1B | NM_152788       | chr12_99194869-99194869_C_T   | 1034R>Q | Substitution | Nonsynonymous coding | 25% |
| MM04T | ANO1     | anoctamin 1, calcium activated chloride channel             | CCDS44663.1     | chr11_69970510-69970510_G_A   | 318D>N  | Substitution | Nonsynonymous coding | 17% |
| MM04T | ANO1     | anoctamin 1, calcium activated chloride channel             | ENST00000316296 | chr11_70009453-70009453_G_A   | 595E>K  | Substitution | Nonsynonymous coding | 34% |
| MM04T | ANO2     | anoctamin 2                                                 | CCDS44807.1     | chr12_5744479-5744479_A_G     | 552I>T  | Substitution | Nonsynonymous coding | 32% |

|       |         |                                                                                     |                 |                              |         |              |                      |     |
|-------|---------|-------------------------------------------------------------------------------------|-----------------|------------------------------|---------|--------------|----------------------|-----|
| MM04T | ANO5    | anoctamin 5                                                                         | CCDS31444.1     | chr11_22279274-22279274_C_A  | 461L>I  | Substitution | Nonsynonymous coding | 40% |
| MM04T | ANO5    | anoctamin 5                                                                         | CCDS31444.1     | chr11_22294375-22294375_T_C  | 692L>S  | Substitution | Nonsynonymous coding | 17% |
| MM04T | ANO5    | anoctamin 5                                                                         | CCDS31444.1     | chr11_22301171-22301171_G_T  | 868E>X  | Substitution | Nonsense             | 26% |
| MM04T | ANO6    | anoctamin 6                                                                         | CCDS44865.1     | chr12_45797291-45797291_T_G  | 618W>G  | Substitution | Nonsynonymous coding | 30% |
| MM04T | ANP32A  | acidic (leucine-rich) nuclear phosphoprotein 32 family, member A                    | CCDS45292.1     | chr15_69076826-69076826_C_T  | 146D>N  | Substitution | Nonsynonymous coding | 28% |
| MM04T | ANPEP   | alanyl (membrane) aminopeptidase                                                    | CCDS10356.1     | chr15_90348636-90348636_C_T  | 225D>N  | Substitution | Nonsynonymous coding | 38% |
| MM04T | ANXA4   | annexin A4                                                                          | CCDS1894.1      | chr2_70015198-70015198_G_T   | 8G>C    | Substitution | Nonsynonymous coding | 12% |
| MM04T | ANXA5   | annexin A5                                                                          | CCDS3720.1      | chr4_122605887-122605887_C_T | 45R>Q   | Substitution | Nonsynonymous coding | 26% |
| MM04T | AOC2    | amine oxidase, copper containing 2 (retina-specific)                                | CCDS11443.1     | chr17_40997293-40997293_G_A  | 217R>Q  | Substitution | Nonsynonymous coding | 33% |
| MM04T | AP1AR   | adaptor-related protein complex 1 associated regulatory protein                     | CCDS3696.1      | chr4_113189329-113189329_C_T | 225R>C  | Substitution | Nonsynonymous coding | 18% |
| MM04T | AP1B1   | adaptor-related protein complex 1, beta 1 subunit                                   | CCDS13855.1     | chr22_29747781-29747781_G_T  | 324F>L  | Substitution | Nonsynonymous coding | 25% |
| MM04T | AP1G2   | adaptor-related protein complex 1, gamma 2 subunit                                  | CCDS9602.1      | chr14_24033256-24033256_G_A  | 364R>W  | Substitution | Nonsynonymous coding | 28% |
| MM04T | AP2A2   | adaptor-related protein complex 2, alpha 2 subunit                                  | CCDS44512.1     | chr11_970203-970203_G_T      | 57K>N   | Substitution | Nonsynonymous coding | 17% |
| MM04T | AP2B1   | adaptor-related protein complex 2, beta 1 subunit                                   | CCDS32621.1     | chr17_33966715-33966715_G_T  | 458R>I  | Substitution | Nonsynonymous coding | 26% |
| MM04T | AP3B2   | adaptor-related protein complex 3, beta 2 subunit                                   | CCDS45331.1     | chr15_83345245-83345245_C_A  | 545A>S  | Substitution | Nonsynonymous coding | 28% |
| MM04T | AP3B2   | adaptor-related protein complex 3, beta 2 subunit                                   | CCDS45331.1     | chr15_83350313-83350313_C_T  | 127R>H  | Substitution | Nonsynonymous coding | 27% |
| MM04T | AP3M1   | adaptor-related protein complex 3, mu 1 subunit                                     | CCDS7342.1      | chr10_75896398-75896398_G_T  | 146S>Y  | Substitution | Nonsynonymous coding | 32% |
| MM04T | AP3M2   | adaptor-related protein complex 3, mu 2 subunit                                     | CCDS6125.1      | chr8_42012324-42012324_C_T   | 40T>I   | Substitution | Nonsynonymous coding | 30% |
| MM04T | AP5B1   | adaptor-related protein complex 5, beta 1 subunit                                   | NM_138368       | chr11_65546585-65546585_G_A  | 403A>V  | Substitution | Nonsynonymous coding | 35% |
| MM04T | APAF1   | apoptotic peptidase activating factor 1                                             | CCDS9069.1      | chr12_99059537-99059537_A_C  | 388I>L  | Substitution | Nonsynonymous coding | 23% |
| MM04T | APAF1   | apoptotic peptidase activating factor 1                                             | CCDS9069.1      | chr12_99117046-99117046_A_G  | 1054K>E | Substitution | Nonsynonymous coding | 37% |
| MM04T | APBB1   | amyloid beta (A4) precursor protein-binding, family B, member 1 (Fe65)              | CCDS31410.1     | chr11_6422650-6422650_C_T    | 503E>K  | Substitution | Nonsynonymous coding | 29% |
| MM04T | APBB1IP | amyloid beta (A4) precursor protein-binding, family B, member 1 interacting protein | CCDS31167.1     | chr10_26785232-26785232_G_T  | NA      | Substitution | Splice site acceptor | 10% |
| MM04T | APBB2   | amyloid beta (A4) precursor protein-binding, family B, member 2                     | CCDS43224.1     | chr4_40832589-40832589_A_C   | 490F>C  | Substitution | Nonsynonymous coding | 24% |
| MM04T | APC2    | adenomatosis polyposis coli 2                                                       | CCDS12068.1     | chr19_1466999-1466999_G_T    | 1233W>C | Substitution | Nonsynonymous coding | 24% |
| MM04T | APCDD1  | adenomatosis polyposis coli down-regulated 1                                        | CCDS11849.1     | chr18_10487664-10487664_G_A  | 392A>T  | Substitution | Nonsynonymous coding | 33% |
| MM04T | APCDD1  | adenomatosis polyposis coli down-regulated 1                                        | CCDS11849.1     | chr18_10487905-10487905_G_T  | 472R>M  | Substitution | Nonsynonymous coding | 24% |
| MM04T | APEX2   | APEX nuclease (apurinic/apyrimidinic endonuclease) 2                                | CCDS14365.1     | chrX_55032976-55032976_G_A   | 222R>H  | Substitution | Nonsynonymous coding | 24% |
| MM04T | APEX2   | APEX nuclease (apurinic/apyrimidinic endonuclease) 2                                | CCDS14365.1     | chrX_55033375-55033375_C_T   | 355S>L  | Substitution | Nonsynonymous coding | 26% |
| MM04T | APEX2   | APEX nuclease (apurinic/apyrimidinic endonuclease) 2                                | CCDS14365.1     | chrX_55033844-55033844_C_A   | 511F>L  | Substitution | Nonsynonymous coding | 27% |
| MM04T | APH1B   | anterior pharynx defective 1 homolog B (C. elegans)                                 | CCDS10184.1     | chr15_63594611-63594611_G_T  | 182E>D  | Substitution | Nonsynonymous coding | 20% |
| MM04T | APIP    | APAF1 interacting protein                                                           | ENST00000395786 | chr11_34912155-34912155_G_T  | 8L>I    | Substitution | Nonsynonymous coding | 23% |



|       |          |                                                                                      |                 |                               |         |              |                      |     |
|-------|----------|--------------------------------------------------------------------------------------|-----------------|-------------------------------|---------|--------------|----------------------|-----|
| MM04T | APLP1    | amyloid beta (A4) precursor-like protein 1                                           | CCDS32997.1     | chr19_36362201-36362201_C_T   | 163R>C  | Substitution | Nonsynonymous coding | 19% |
| MM04T | APLP1    | amyloid beta (A4) precursor-like protein 1                                           | CCDS32997.1     | chr19_36365671-36365671_G_A   | 415R>H  | Substitution | Nonsynonymous coding | 31% |
| MM04T | APOA1BP  | apolipoprotein A-I binding protein                                                   | CCDS1145.1      | chr1_156563694-156563694_A_G  | 229N>D  | Substitution | Nonsynonymous coding | 30% |
| MM04T | APOA4    | apolipoprotein A-IV                                                                  | CCDS31681.1     | chr11_116692026-116692026_C_T | 250E>K  | Substitution | Nonsynonymous coding | 30% |
| MM04T | APOB     | apolipoprotein B (including Ag(x) antigen)                                           | CCDS1703.1      | chr2_21231026-21231026_T_C    | 2905D>G | Substitution | Nonsynonymous coding | 25% |
| MM04T | APOB     | apolipoprotein B (including Ag(x) antigen)                                           | CCDS1703.1      | chr2_21256244-21256244_G_T    | 351L>M  | Substitution | Nonsynonymous coding | 27% |
| MM04T | APOBEC2  | apolipoprotein B mRNA editing enzyme, catalytic polypeptide-like 2                   | CCDS4848.1      | chr6_41029488-41029488_G_A    | 185E>K  | Substitution | Nonsynonymous coding | 28% |
| MM04T | APOH     | apolipoprotein H (beta-2-glycoprotein I)                                             | CCDS11663.1     | chr17_64210692-64210692_C_A   | 287K>N  | Substitution | Nonsynonymous coding | 23% |
| MM04T | APOL4    | apolipoprotein L, 4                                                                  | ENST00000352371 | chr22_36587785-36587785_C_A   | 131E>X  | Substitution | Nonsense             | 24% |
| MM04T | APOL5    | apolipoprotein L, 5                                                                  | CCDS13920.1     | chr22_36122770-36122770_A_C   | 219N>H  | Substitution | Nonsynonymous coding | 33% |
| MM04T | AQP12A   | aquaporin 12A                                                                        | CCDS2542.1      | chr2_241631427-241631427_G_A  | 33A>T   | Substitution | Nonsynonymous coding | 29% |
| MM04T | ARAP2    | ArfGAP with RhoGAP domain, ankyrin repeat and PH domain 2                            | CCDS3441.1      | chr4_36069774-36069774_G_A    | 1624R>X | Substitution | Nonsense             | 29% |
| MM04T | ARFGEF1  | ADP-ribosylation factor guanine nucleotide-exchange factor 1 (brefeldin A-inhibited) | CCDS6199.1      | chr8_68170411-68170411_A_G    | 784F>L  | Substitution | Nonsynonymous coding | 32% |
| MM04T | ARFIP1   | ADP-ribosylation factor interacting protein 1                                        | CCDS34080.1     | chr4_153784822-153784822_T_C  | 53F>S   | Substitution | Nonsynonymous coding | 38% |
| MM04T | ARHGAP10 | Rho GTPase activating protein 10                                                     | CCDS34075.1     | chr4_148800431-148800431_G_A  | 294R>Q  | Substitution | Nonsynonymous coding | 32% |
| MM04T | ARHGAP10 | Rho GTPase activating protein 10                                                     | CCDS34075.1     | chr4_148744100-148744100_G_T  | 102E>X  | Substitution | Nonsense             | 30% |
| MM04T | ARHGAP12 | Rho GTPase activating protein 12                                                     | CCDS7170.1      | chr10_32106793-32106793_C_A   | 552E>X  | Substitution | Nonsense             | 31% |
| MM04T | ARHGAP15 | Rho GTPase activating protein 15                                                     | CCDS2184.1      | chr2_144461056-144461056_C_T  | 403R>C  | Substitution | Nonsynonymous coding | 23% |
| MM04T | ARHGAP15 | Rho GTPase activating protein 15                                                     | CCDS2184.1      | chr2_144525678-144525678_G_T  | 455Q>H  | Substitution | Nonsynonymous coding | 28% |
| MM04T | ARHGAP18 | Rho GTPase activating protein 18                                                     | CCDS34535.1     | chr6_129963019-129963019_C_A  | 86K>N   | Substitution | Nonsynonymous coding | 29% |
| MM04T | ARHGAP21 | Rho GTPase activating protein 21                                                     | CCDS7144.2      | chr10_24880217-24880217_G_A   | 1363P>S | Substitution | Nonsynonymous coding | 26% |
| MM04T | ARHGAP29 | Rho GTPase activating protein 29                                                     | CCDS748.1       | chr1_94650597-94650597_C_T    | 647R>Q  | Substitution | Nonsynonymous coding | 13% |
| MM04T | ARHGAP29 | Rho GTPase activating protein 29                                                     | CCDS748.1       | chr1_94652141-94652141_C_T    | 565R>Q  | Substitution | Nonsynonymous coding | 29% |
| MM04T | ARHGAP30 | Rho GTPase activating protein 30                                                     | CCDS30918.1     | chr1_161029488-161029488_C_T  | 39S>N   | Substitution | Nonsynonymous coding | 17% |
| MM04T | ARHGAP31 | Rho GTPase activating protein 31                                                     | CCDS43135.1     | chr3_119134857-119134857_C_A  | 1361P>T | Substitution | Nonsynonymous coding | 27% |
| MM04T | ARHGAP32 | Rho GTPase activating protein 32                                                     | CCDS44769.1     | chr11_128840099-128840099_G_T | 1656S>Y | Substitution | Nonsynonymous coding | 17% |
| MM04T | ARHGAP4  | Rho GTPase activating protein 4                                                      | CCDS14736.1     | chrX_153174908-153174908_C_A  | 832E>D  | Substitution | Nonsynonymous coding | 16% |
| MM04T | ARHGAP5  | Rho GTPase activating protein 5                                                      | CCDS32062.1     | chr14_32561314-32561314_G_A   | 480R>Q  | Substitution | Nonsynonymous coding | 22% |
| MM04T | ARHGAP5  | Rho GTPase activating protein 5                                                      | CCDS32062.1     | chr14_32562261-32562261_C_A   | 796L>I  | Substitution | Nonsynonymous coding | 23% |
| MM04T | ARHGAP5  | Rho GTPase activating protein 5                                                      | CCDS32062.1     | chr14_32563196-32563196_G_T   | 1107E>D | Substitution | Nonsynonymous coding | 24% |
| MM04T | ARHGAP6  | Rho GTPase activating protein 6                                                      | CCDS14142.1     | chrX_11162006-11162006_G_A    | 757S>L  | Substitution | Nonsynonymous coding | 33% |
| MM04T | ARHGAP9  | Rho GTPase activating protein 9                                                      | CCDS8941.2      | chr12_57871406-57871406_G_A   | 198R>C  | Substitution | Nonsynonymous coding | 52% |

|       |          |                                                         |                 |                               |         |              |                      |     |
|-------|----------|---------------------------------------------------------|-----------------|-------------------------------|---------|--------------|----------------------|-----|
| MM04T | ARHGEF10 | Rho guanine nucleotide exchange factor (GEF)<br>10      | CCDS34794.1     | chr8_1824809-1824809_C_T      | 251S>L  | Substitution | Nonsynonymous coding | 30% |
| MM04T | ARHGEF10 | Rho guanine nucleotide exchange factor (GEF)<br>10      | CCDS34794.1     | chr8_1828252-1828252_G_T      | 294E>D  | Substitution | Nonsynonymous coding | 27% |
| MM04T | ARHGEF10 | Rho guanine nucleotide exchange factor (GEF)<br>10      | CCDS34794.1     | chr8_1873494-1873494_A_C      | 845N>T  | Substitution | Nonsynonymous coding | 15% |
| MM04T | ARHGEF12 | Rho guanine nucleotide exchange factor (GEF)<br>12      | CCDS41727.1     | chr11_120317210-120317210_G_T | 482D>Y  | Substitution | Nonsynonymous coding | 27% |
| MM04T | ARHGEF12 | Rho guanine nucleotide exchange factor (GEF)<br>12      | CCDS41727.1     | chr11_120328462-120328462_G_A | 741R>Q  | Substitution | Nonsynonymous coding | 20% |
| MM04T | ARHGEF12 | Rho guanine nucleotide exchange factor (GEF)<br>12      | CCDS41727.1     | chr11_120331411-120331411_G_A | 853R>Q  | Substitution | Nonsynonymous coding | 19% |
| MM04T | ARHGEF15 | Rho guanine nucleotide exchange factor (GEF)<br>15      | CCDS11139.1     | chr17_8215500-8215500_G_A     | 48R>Q   | Substitution | Nonsynonymous coding | 27% |
| MM04T | ARHGEF15 | Rho guanine nucleotide exchange factor (GEF)<br>15      | CCDS11139.1     | chr17_8218383-8218383_G_T     | NA      | Substitution | Splice site acceptor | 19% |
| MM04T | ARHGEF25 | Rho guanine nucleotide exchange factor (GEF)<br>25      | CCDS44931.1     | chr12_58006838-58006838_G_A   | 114V>I  | Substitution | Nonsynonymous coding | 40% |
| MM04T | ARHGEF28 | Rho guanine nucleotide exchange factor (GEF)<br>28      | CCDS47231.1     | chr5_73207389-73207389_C_A    | 1646S>Y | Substitution | Nonsynonymous coding | 37% |
| MM04T | ARHGEF39 | Rho guanine nucleotide exchange factor (GEF)<br>39      | CCDS6584.2      | chr9_35664112-35664112_C_A    | 122K>N  | Substitution | Nonsynonymous coding | 27% |
| MM04T | ARHGEF4  | Rho guanine nucleotide exchange factor (GEF)<br>4       | ENST00000409359 | chr2_131673020-131673020_A_G  | 171N>D  | Substitution | Nonsynonymous coding | 20% |
| MM04T | ARHGEF4  | Rho guanine nucleotide exchange factor (GEF)<br>4       | CCDS2165.1      | chr2_131802064-131802064_C_T  | 598L>F  | Substitution | Nonsynonymous coding | 23% |
| MM04T | ARHGEF4  | Rho guanine nucleotide exchange factor (GEF)<br>4       | CCDS2165.1      | chr2_131802119-131802119_C_T  | NA      | Substitution | Splice site donor    | 48% |
| MM04T | ARHGEF40 | Rho guanine nucleotide exchange factor (GEF)<br>40      | CCDS32041.1     | chr14_21543302-21543302_G_T   | 471E>D  | Substitution | Nonsynonymous coding | 36% |
| MM04T | ARHGEF40 | Rho guanine nucleotide exchange factor (GEF)<br>40      | CCDS32041.1     | chr14_21544937-21544937_C_T   | 641A>V  | Substitution | Nonsynonymous coding | 32% |
| MM04T | ARHGEF9  | Cdc42 guanine nucleotide exchange factor<br>(GEF) 9     | CCDS35315.1     | chrX_62898432-62898432_G_T    | 194Y>X  | Substitution | Nonsense             | 16% |
| MM04T | ARID1A   | AT rich interactive domain 1A (SWI-like)                | CCDS285.1       | chr1_27087389-27087389_G_T    | 655G>X  | Substitution | Nonsense             | 23% |
| MM04T | ARID1A   | AT rich interactive domain 1A (SWI-like)                | CCDS285.1       | chr1_27089730-27089730_G_T    | 896E>X  | Substitution | Nonsense             | 23% |
| MM04T | ARID1A   | AT rich interactive domain 1A (SWI-like)                | CCDS285.1       | chr1_27106354-27106354_C_T    | 1989R>X | Substitution | Nonsense             | 37% |
| MM04T | ARID1B   | AT rich interactive domain 1B (SWI1-like)               | ENST00000354354 | chr6_157507638-157507638_C_T  | 691P>S  | Substitution | Nonsynonymous coding | 29% |
| MM04T | ARID1B   | AT rich interactive domain 1B (SWI1-like)               | CCDS5251.1      | chr6_157100582-157100582_G_T  | 449G>X  | Substitution | Nonsense             | 18% |
| MM04T | ARID2    | AT rich interactive domain 2 (ARID, RFX-like)           | CCDS31783.1     | chr12_46215258-46215258_A_C   | 231R>S  | Substitution | Nonsynonymous coding | 29% |
| MM04T | ARID2    | AT rich interactive domain 2 (ARID, RFX-like)           | CCDS31783.1     | chr12_46298742-46298742_T_G   | 1797L>V | Substitution | Nonsynonymous coding | 22% |
| MM04T | ARID4A   | AT rich interactive domain 4A (RBP1-like)               | CCDS9732.1      | chr14_58831193-58831193_C_T   | 796R>X  | Substitution | Nonsense             | 27% |
| MM04T | ARID4B   | AT rich interactive domain 4B (RBP1-like)               | CCDS31061.1     | chr1_235357527-235357527_C_A  | NA      | Substitution | Splice site acceptor | 31% |
| MM04T | ARID4B   | AT rich interactive domain 4B (RBP1-like)               | CCDS31061.1     | chr1_235397750-235397750_G_A  | 215R>X  | Substitution | Nonsense             | 42% |
| MM04T | ARID5A   | AT rich interactive domain 5A (MRF1-like)               | CCDS33251.1     | chr2_97216960-97216960_C_T    | 232A>V  | Substitution | Nonsynonymous coding | 29% |
| MM04T | ARID5B   | AT rich interactive domain 5B (MRF1-like)               | CCDS31208.1     | chr10_63851560-63851560_C_T   | 780R>X  | Substitution | Nonsense             | 26% |
| MM04T | ARL2BP   | ADP-ribosylation factor-like 2 binding protein          | CCDS10776.1     | chr16_57282473-57282473_G_T   | 42R>I   | Substitution | Nonsynonymous coding | 33% |
| MM04T | ARL6IP4  | ADP-ribosylation-like factor 6 interacting<br>protein 4 | CCDS31923.1     | chr12_123465757-123465757_G_T | 147R>I  | Substitution | Nonsynonymous coding | 19% |
| MM04T | ARMC1    | armadillo repeat containing 1                           | CCDS6181.1      | chr8_66517500-66517500_C_A    | 219E>X  | Substitution | Nonsense             | 27% |

|       |        |                                                       |             |                               |         |              |                      |     |
|-------|--------|-------------------------------------------------------|-------------|-------------------------------|---------|--------------|----------------------|-----|
| MM04T | ARMC12 | armadillo repeat containing 12                        | CCDS4809.1  | chr6_35704964-35704964_G_A    | 27A>T   | Substitution | Nonsynonymous coding | 29% |
| MM04T | ARMC12 | armadillo repeat containing 12                        | CCDS4809.1  | chr6_35715059-35715059_G_A    | 183E>K  | Substitution | Nonsynonymous coding | 18% |
| MM04T | ARMC3  | armadillo repeat containing 3                         | CCDS7142.1  | chr10_23319593-23319593_T_G   | 705F>C  | Substitution | Nonsynonymous coding | 28% |
| MM04T | ARMC4  | armadillo repeat containing 4                         | CCDS7157.1  | chr10_28151419-28151419_A_C   | 915L>V  | Substitution | Nonsynonymous coding | 23% |
| MM04T | ARMC8  | armadillo repeat containing 8                         | CCDS3098.1  | chr3_137942253-137942253_G_T  | 59E>X   | Substitution | Nonsense             | 43% |
| MM04T | ARMC8  | armadillo repeat containing 8                         | CCDS3098.1  | chr3_137960643-137960643_C_T  | 272R>X  | Substitution | Nonsense             | 22% |
| MM04T | ARMCX2 | armadillo repeat containing, X-linked 2               | CCDS14490.1 | chrX_100911769-100911769_G_A  | 269P>L  | Substitution | Nonsynonymous coding | 28% |
| MM04T | ARMCX2 | armadillo repeat containing, X-linked 2               | CCDS14490.1 | chrX_100911974-100911974_C_T  | 201A>T  | Substitution | Nonsynonymous coding | 18% |
| MM04T | ARNTL  | aryl hydrocarbon receptor nuclear translocator-like   | CCDS31430.1 | chr11_13381934-13381934_T_G   | 141F>C  | Substitution | Nonsynonymous coding | 29% |
| MM04T | ARNTL2 | aryl hydrocarbon receptor nuclear translocator-like 2 | CCDS8712.1  | chr12_27523120-27523120_C_A   | 81L>I   | Substitution | Nonsynonymous coding | 28% |
| MM04T | ARPC2  | actin related protein 2/3 complex, subunit 2, 34kDa   | CCDS2410.1  | chr2_219099099-219099099_T_G  | 83F>V   | Substitution | Nonsynonymous coding | 25% |
| MM04T | ARPP21 | cAMP-regulated phosphoprotein, 21kDa                  | CCDS2661.1  | chr3_35723323-35723323_G_A    | 27G>D   | Substitution | Nonsynonymous coding | 35% |
| MM04T | ARPP21 | cAMP-regulated phosphoprotein, 21kDa                  | CCDS2661.1  | chr3_35750523-35750523_G_T    | 286E>D  | Substitution | Nonsynonymous coding | 17% |
| MM04T | ARPP21 | cAMP-regulated phosphoprotein, 21kDa                  | CCDS2661.1  | chr3_35833904-35833904_G_T    | 688G>V  | Substitution | Nonsynonymous coding | 34% |
| MM04T | ARPP21 | cAMP-regulated phosphoprotein, 21kDa                  | CCDS2661.1  | chr3_35748563-35748563_G_T    | 262E>X  | Substitution | Nonsense             | 32% |
| MM04T | ARR3   | arrestin 3, retinal (X-arrestin)                      | CCDS14399.1 | chrX_69496001-69496001_G_A    | 72R>Q   | Substitution | Nonsynonymous coding | 33% |
| MM04T | ARR3   | arrestin 3, retinal (X-arrestin)                      | CCDS14399.1 | chrX_69496569-69496569_G_T    | 152E>D  | Substitution | Nonsynonymous coding | 12% |
| MM04T | ARR3   | arrestin 3, retinal (X-arrestin)                      | CCDS14399.1 | chrX_69498455-69498455_T_G    | 290L>R  | Substitution | Nonsynonymous coding | 18% |
| MM04T | ARSE   | arylsulfatase E (chondrodysplasia punctata 1)         | CCDS14122.1 | chrX_2876450-2876450_G_A      | 17A>V   | Substitution | Nonsynonymous coding | 24% |
| MM04T | ARSF   | arylsulfatase F                                       | CCDS14123.1 | chrX_2998941-2998941_C_A      | 98S>Y   | Substitution | Nonsynonymous coding | 26% |
| MM04T | ARSF   | arylsulfatase F                                       | CCDS14123.1 | chrX_3030310-3030310_G_T      | 496E>X  | Substitution | Nonsense             | 35% |
| MM04T | ARSI   | arylsulfatase family, member I                        | CCDS34275.1 | chr5_149677576-149677576_G_A  | 304S>L  | Substitution | Nonsynonymous coding | 36% |
| MM04T | AS3MT  | arsenic (+3 oxidation state) methyltransferase        | CCDS41567.1 | chr10_104632939-104632939_T_C | 136I>T  | Substitution | Nonsynonymous coding | 25% |
| MM04T | ASAH1  | N-acylsphingosine amidohydrolase (acid ceramidase) 1  | CCDS6005.1  | chr8_17927368-17927368_G_T    | 95S>Y   | Substitution | Nonsynonymous coding | 40% |
| MM04T | ASAH1  | N-acylsphingosine amidohydrolase (acid ceramidase) 1  | CCDS6005.1  | chr8_17942308-17942308_C_A    | 1M>I    | Substitution | Nonsynonymous coding | 36% |
| MM04T | ASB1   | ankyrin repeat and SOCS box containing 1              | CCDS33416.1 | chr2_239344416-239344416_G_A  | 86A>T   | Substitution | Nonsynonymous coding | 29% |
| MM04T | ASB12  | ankyrin repeat and SOCS box containing 12             | CCDS14378.1 | chrX_63445085-63445085_T_G    | 140D>A  | Substitution | Nonsynonymous coding | 19% |
| MM04T | ASB15  | ankyrin repeat and SOCS box containing 15             | CCDS34742.1 | chr7_123277005-123277005_T_G  | 579D>E  | Substitution | Nonsynonymous coding | 46% |
| MM04T | ASB7   | ankyrin repeat and SOCS box containing 7              | CCDS10387.1 | chr15_101188569-101188569_C_T | 287R>X  | Substitution | Nonsense             | 23% |
| MM04T | ASCC3  | activating signal cointegrator 1 complex subunit 3    | CCDS5046.1  | chr6_101037638-101037638_G_A  | 1808R>C | Substitution | Nonsynonymous coding | 35% |
| MM04T | ASCC3  | activating signal cointegrator 1 complex subunit 3    | CCDS5046.1  | chr6_101248198-101248198_G_A  | 369P>S  | Substitution | Nonsynonymous coding | 13% |
| MM04T | ASCC3  | activating signal cointegrator 1 complex subunit 3    | CCDS5046.1  | chr6_101296422-101296422_T_G  | 135N>H  | Substitution | Nonsynonymous coding | 40% |

|       |        |                                                                      |             |                               |         |              |                      |     |
|-------|--------|----------------------------------------------------------------------|-------------|-------------------------------|---------|--------------|----------------------|-----|
| MM04T | ASCC3  | activating signal cointegrator 1 complex subunit 3                   | CCDS5046.1  | chr6_101312026-101312026_T_G  | 52K>T   | Substitution | Nonsynonymous coding | 44% |
| MM04T | ASCL3  | achaete-scute complex homolog 3 (Drosophila)                         | CCDS7795.1  | chr11_8959173-8959173_C_A     | 179R>I  | Substitution | Nonsynonymous coding | 32% |
| MM04T | ASH1L  | ash1 (absent, small, or homeotic)-like (Drosophila)                  | CCDS1113.2  | chr1_155450767-155450767_C_A  | 632E>X  | Substitution | Nonsense             | 22% |
| MM04T | ASH2L  | ash2 (absent, small, or homeotic)-like (Drosophila)                  | CCDS6101.1  | chr8_37991002-37991002_T_G    | 520F>V  | Substitution | Nonsynonymous coding | 26% |
| MM04T | ASIC1  | acid-sensing (proton-gated) ion channel 1                            | CCDS8796.1  | chr12_50452838-50452838_G_A   | 97E>K   | Substitution | Nonsynonymous coding | 30% |
| MM04T | ASIC3  | acid-sensing (proton-gated) ion channel 3                            | CCDS5915.1  | chr7_150747337-150747337_G_A  | 227D>N  | Substitution | Nonsynonymous coding | 18% |
| MM04T | ASNSD1 | asparagine synthetase domain containing 1                            | CCDS2300.1  | chr2_190532013-190532013_C_A  | 385F>L  | Substitution | Nonsynonymous coding | 31% |
| MM04T | ASPA   | aspartoacylase                                                       | CCDS11028.1 | chr17_3402321-3402321_C_T     | 294A>V  | Substitution | Nonsynonymous coding | 11% |
| MM04T | ASPM   | asp (abnormal spindle) homolog, microcephaly associated (Drosophila) | CCDS1389.1  | chr1_197069692-197069692_G_T  | 2897L>M | Substitution | Nonsynonymous coding | 30% |
| MM04T | ASPM   | asp (abnormal spindle) homolog, microcephaly associated (Drosophila) | CCDS1389.1  | chr1_197071585-197071585_C_T  | 2266A>T | Substitution | Nonsynonymous coding | 27% |
| MM04T | ASPM   | asp (abnormal spindle) homolog, microcephaly associated (Drosophila) | CCDS1389.1  | chr1_197073715-197073715_A_C  | 1556L>V | Substitution | Nonsynonymous coding | 33% |
| MM04T | ASPM   | asp (abnormal spindle) homolog, microcephaly associated (Drosophila) | CCDS1389.1  | chr1_197093390-197093390_C_A  | 1080K>N | Substitution | Nonsynonymous coding | 23% |
| MM04T | ASPM   | asp (abnormal spindle) homolog, microcephaly associated (Drosophila) | CCDS1389.1  | chr1_197112753-197112753_T_G  | 210N>T  | Substitution | Nonsynonymous coding | 35% |
| MM04T | ASPN   | asporin                                                              | CCDS6697.1  | chr9_95219620-95219620_G_A    | 365R>C  | Substitution | Nonsynonymous coding | 29% |
| MM04T | ASTE1  | asteroid homolog 1 (Drosophila)                                      | CCDS3068.1  | chr3_130737545-130737545_G_A  | 440R>W  | Substitution | Nonsynonymous coding | 18% |
| MM04T | ASTL   | astacin-like metallo-endopeptidase (M12 family)                      | CCDS33249.1 | chr2_96789620-96789620_C_A    | 422R>I  | Substitution | Nonsynonymous coding | 30% |
| MM04T | ASTN1  | astrotactin 1                                                        | CCDS1319.1  | chr1_176857320-176857320_C_T  | 987M>I  | Substitution | Nonsynonymous coding | 41% |
| MM04T | ASTN1  | astrotactin 1                                                        | CCDS1319.1  | chr1_177000058-177000058_T_C  | 299N>S  | Substitution | Nonsynonymous coding | 35% |
| MM04T | ASTN2  | astrotactin 2                                                        | CCDS48009.1 | chr9_120053734-120053734_C_A  | 167E>D  | Substitution | Nonsynonymous coding | 25% |
| MM04T | ASUN   | asunder, spermatogenesis regulator                                   | CCDS8708.1  | chr12_27067027-27067027_G_T   | 485S>Y  | Substitution | Nonsynonymous coding | 33% |
| MM04T | ASXL3  | additional sex combs like 3 (Drosophila)                             | CCDS45847.1 | chr18_31322851-31322851_G_T   | NA      | Substitution | Splice site acceptor | 29% |
| MM04T | ASXL3  | additional sex combs like 3 (Drosophila)                             | CCDS45847.1 | chr18_31187564-31187564_G_T   | 21E>X   | Substitution | Nonsense             | 36% |
| MM04T | ASXL3  | additional sex combs like 3 (Drosophila)                             | CCDS45847.1 | chr18_31251752-31251752_G_T   | 213E>X  | Substitution | Nonsense             | 32% |
| MM04T | ATAD2  | ATPase family, AAA domain containing 2                               | CCDS6343.1  | chr8_124348669-124348669_T_A  | 1052D>V | Substitution | Nonsynonymous coding | 33% |
| MM04T | ATAD2B | ATPase family, AAA domain containing 2B                              | CCDS46227.1 | chr2_24110750-24110750_C_A    | 175R>I  | Substitution | Nonsynonymous coding | 25% |
| MM04T | ATAD2B | ATPase family, AAA domain containing 2B                              | CCDS46227.1 | chr2_24021197-24021197_A_T    | NA      | Substitution | Splice site acceptor | 24% |
| MM04T | ATAD5  | ATPase family, AAA domain containing 5                               | CCDS11260.1 | chr17_29161650-29161650_C_A   | 184S>Y  | Substitution | Nonsynonymous coding | 33% |
| MM04T | ATCAY  | ataxia, cerebellar, Cayman type                                      | CCDS45923.1 | chr19_3910851-3910851_T_G     | 277I>S  | Substitution | Nonsynonymous coding | 28% |
| MM04T | ATE1   | arginyltransferase 1                                                 | CCDS31299.1 | chr10_123673380-123673380_T_G | 88K>Q   | Substitution | Nonsynonymous coding | 22% |
| MM04T | ATF7   | activating transcription factor 7                                    | CCDS44905.1 | chr12_53911105-53911105_G_T   | 434S>Y  | Substitution | Nonsynonymous coding | 23% |
| MM04T | ATF7IP | activating transcription factor 7 interacting protein                | CCDS8663.1  | chr12_14650839-14650839_G_T   | 1215K>N | Substitution | Nonsynonymous coding | 38% |
| MM04T | ATF7IP | activating transcription factor 7 interacting protein                | CCDS8663.1  | chr12_14649176-14649176_C_T   | 1098R>X | Substitution | Nonsense             | 36% |

|       |          |                                                                                          |                 |                               |         |              |                      |     |
|-------|----------|------------------------------------------------------------------------------------------|-----------------|-------------------------------|---------|--------------|----------------------|-----|
| MM04T | ATF7IP2  | activating transcription factor 7 interacting protein 2                                  | CCDS10540.1     | chr16_10575768-10575768_C_T   | 571R>X  | Substitution | Nonsense             | 20% |
| MM04T | ATG2A    | autophagy related 2A                                                                     | CCDS31602.1     | chr11_64670835-64670835_A_C   | 1179D>E | Substitution | Nonsynonymous coding | 36% |
| MM04T | ATG2B    | autophagy related 2B                                                                     | CCDS9944.2      | chr14_96752156-96752156_C_A   | 2058R>I | Substitution | Nonsynonymous coding | 21% |
| MM04T | ATG2B    | autophagy related 2B                                                                     | CCDS9944.2      | chr14_96797746-96797746_A_C   | 566V>G  | Substitution | Nonsynonymous coding | 26% |
| MM04T | ATG2B    | autophagy related 2B                                                                     | CCDS9944.2      | chr14_96800208-96800208_T_G   | 342N>H  | Substitution | Nonsynonymous coding | 18% |
| MM04T | ATG4C    | autophagy related 4C, cysteine peptidase                                                 | CCDS623.1       | chr1_63307175-63307175_G_A    | 389R>Q  | Substitution | Nonsynonymous coding | 27% |
| MM04T | ATG5     | autophagy related 5                                                                      | CCDS5055.1      | chr6_106634522-106634522_G_T  | 241H>N  | Substitution | Nonsynonymous coding | 29% |
| MM04T | ATG7     | autophagy related 7                                                                      | CCDS2605.1      | chr3_11468391-11468391_A_C    | 690Q>H  | Substitution | Nonsynonymous coding | 28% |
| MM04T | ATIC     | 5-aminoimidazole-4-carboxamide ribonucleotide formyltransferase/IMP                      | CCDS2398.1      | chr2_216203539-216203539_G_A  | 379R>Q  | Substitution | Nonsynonymous coding | 37% |
| MM04T | ATM      | ataxia telangiectasia mutated                                                            | CCDS31669.1     | chr11_108165729-108165729_C_T | 1618R>X | Substitution | Nonsense             | 26% |
| MM04T | ATP10B   | ATPase, class V, type 10B                                                                | CCDS43394.1     | chr5_160018118-160018118_G_T  | 1198S>Y | Substitution | Nonsynonymous coding | 32% |
| MM04T | ATP10B   | ATPase, class V, type 10B                                                                | CCDS43394.1     | chr5_160113098-160113098_C_T  | 153R>Q  | Substitution | Nonsynonymous coding | 21% |
| MM04T | ATP10B   | ATPase, class V, type 10B                                                                | CCDS43394.1     | chr5_160033805-160033805_G_A  | 1043R>X | Substitution | Nonsense             | 22% |
| MM04T | ATP10D   | ATPase, class V, type 10D                                                                | CCDS3476.1      | chr4_47565654-47565654_C_A    | 909L>I  | Substitution | Nonsynonymous coding | 23% |
| MM04T | ATP11A   | ATPase, class VI, type 11A                                                               | CCDS32011.1     | chr13_113530207-113530207_G_T | 1093K>N | Substitution | Nonsynonymous coding | 18% |
| MM04T | ATP11B   | ATPase, class VI, type 11B                                                               | CCDS33896.1     | chr3_182553890-182553890_G_A  | 128R>Q  | Substitution | Nonsynonymous coding | 35% |
| MM04T | ATP11B   | ATPase, class VI, type 11B                                                               | CCDS33896.1     | chr3_182591616-182591616_C_T  | 689R>X  | Substitution | Nonsense             | 26% |
| MM04T | ATP11C   | ATPase, class VI, type 11C                                                               | CCDS14668.1     | chrX_138845560-138845560_C_A  | 806K>N  | Substitution | Nonsynonymous coding | 42% |
| MM04T | ATP11C   | ATPase, class VI, type 11C                                                               | CCDS14668.1     | chrX_138884391-138884391_T_G  | NA      | Substitution | Splice site donor    | 16% |
| MM04T | ATP13A1  | ATPase type 13A1                                                                         | CCDS32970.2     | chr19_19764795-19764795_C_T   | 658E>K  | Substitution | Nonsynonymous coding | 33% |
| MM04T | ATP13A1  | ATPase type 13A1                                                                         | ENST00000291503 | chr19_19772920-19772920_C_A   | 2E>D    | Substitution | Nonsynonymous coding | 25% |
| MM04T | ATP13A3  | ATPase type 13A3                                                                         | CCDS43187.1     | chr3_194180667-194180667_G_A  | 87R>C   | Substitution | Nonsynonymous coding | 24% |
| MM04T | ATP13A5  | ATPase type 13A5                                                                         | CCDS33914.1     | chr3_193028483-193028483_A    | NA      | Insertion    | Frameshift           | 31% |
| MM04T | ATP13A5  | ATPase type 13A5                                                                         | CCDS33914.1     | chr3_193081129-193081129_A_C  | 94Y>D   | Substitution | Nonsynonymous coding | 19% |
| MM04T | ATP1A2   | ATPase, Na <sup>+</sup> /K <sup>+</sup> transporting, alpha 2 polypeptide                | CCDS1196.1      | chr1_160109762-160109762_C_T  | 1008R>W | Substitution | Nonsynonymous coding | 29% |
| MM04T | ATP1A4   | ATPase, Na <sup>+</sup> /K <sup>+</sup> transporting, alpha 4 polypeptide                | CCDS1197.1      | chr1_160121879-160121879_C_A  | 17P>T   | Substitution | Nonsynonymous coding | 18% |
| MM04T | ATP1A4   | ATPase, Na <sup>+</sup> /K <sup>+</sup> transporting, alpha 4 polypeptide                | CCDS1197.1      | chr1_160134108-160134108_T_G  | 314F>C  | Substitution | Nonsynonymous coding | 22% |
| MM04T | ATP1A4   | ATPase, Na <sup>+</sup> /K <sup>+</sup> transporting, alpha 4 polypeptide                | CCDS1197.1      | chr1_160144523-160144523_C_T  | 766T>M  | Substitution | Nonsynonymous coding | 18% |
| MM04T | ATP1B4   | ATPase, Na <sup>+</sup> /K <sup>+</sup> transporting, beta 4 polypeptide                 | CCDS48158.1     | chrX_119509422-119509422_G_A  | 253R>Q  | Substitution | Nonsynonymous coding | 42% |
| MM04T | ATP5C1   | ATP synthase, H <sup>+</sup> transporting, mitochondrial F1 complex, gamma polypeptide 1 | CCDS31142.1     | chr10_7844253-7844253_G_A     | 220D>N  | Substitution | Nonsynonymous coding | 19% |
| MM04T | ATP6AP1  | ATPase, H <sup>+</sup> transporting, lysosomal accessory protein 1                       | CCDS35451.1     | chrX_153663808-153663808_G_A  | 387R>H  | Substitution | Nonsynonymous coding | 23% |
| MM04T | ATP6AP1L | ATPase, H <sup>+</sup> transporting, lysosomal accessory protein 1-like                  | CCDS34196.1     | chr5_81614027-81614027_C_T    | 195R>X  | Substitution | Nonsense             | 33% |

|       |          |                                                                   |             |                               |         |              |                      |     |
|-------|----------|-------------------------------------------------------------------|-------------|-------------------------------|---------|--------------|----------------------|-----|
| MM04T | ATP6V0A2 | ATPase, H+ transporting, lysosomal V0 subunit a2                  | CCDS9254.1  | chr12_124233134-124233134_G_T | 579K>N  | Substitution | Nonsynonymous coding | 27% |
| MM04T | ATP6V1C2 | ATPase, H+ transporting, lysosomal 42kDa, V1 subunit C2           | CCDS42653.1 | chr2_10912727-10912727_G_A    | 210R>Q  | Substitution | Nonsynonymous coding | 14% |
| MM04T | ATP6V1G1 | ATPase, H+ transporting, lysosomal 13kDa, V1 subunit G1           | CCDS6807.1  | chr9_117354909-117354909_G_T  | 54E>X   | Substitution | Nonsense             | 32% |
| MM04T | ATP7A    | ATPase, Cu++ transporting, alpha polypeptide                      | CCDS35339.1 | chrX_77284769-77284769_G_A    | 980R>Q  | Substitution | Nonsynonymous coding | 46% |
| MM04T | ATP7A    | ATPase, Cu++ transporting, alpha polypeptide                      | CCDS35339.1 | chrX_77286958-77286958_C_A    | 1058Q>K | Substitution | Nonsynonymous coding | 13% |
| MM04T | ATP7A    | ATPase, Cu++ transporting, alpha polypeptide                      | CCDS35339.1 | chrX_77289250-77289250_G_A    | 1148V>I | Substitution | Nonsynonymous coding | 14% |
| MM04T | ATP7A    | ATPase, Cu++ transporting, alpha polypeptide                      | CCDS35339.1 | chrX_77298215-77298215_G_A    | 1312A>T | Substitution | Nonsynonymous coding | 17% |
| MM04T | ATP7A    | ATPase, Cu++ transporting, alpha polypeptide                      | CCDS35339.1 | chrX_77302047-77302047_G_T    | 1495D>Y | Substitution | Nonsynonymous coding | 18% |
| MM04T | ATP7A    | ATPase, Cu++ transporting, alpha polypeptide                      | CCDS35339.1 | chrX_77301004-77301004_G_A    | 1387W>X | Substitution | Nonsense             | 15% |
| MM04T | ATP7B    | ATPase, Cu++ transporting, beta polypeptide                       | CCDS41892.1 | chr13_52549254-52549254_C_A   | 34K>N   | Substitution | Nonsynonymous coding | 22% |
| MM04T | ATP8A2   | ATPase, aminophospholipid transporter, class I, type 8A, member 2 | CCDS41873.1 | chr13_26402284-26402284_C_A   | 903S>Y  | Substitution | Nonsynonymous coding | 24% |
| MM04T | ATP8B3   | ATPase, aminophospholipid transporter, class I, type 8B, member 3 | CCDS45901.1 | chr19_1800385-1800385_C_A     | 406E>X  | Substitution | Nonsense             | 21% |
| MM04T | ATP9B    | ATPase, class II, type 9B                                         | CCDS12014.1 | chr18_77104307-77104307_C_T   | 809R>X  | Substitution | Nonsense             | 32% |
| MM04T | ATR      | ataxia telangiectasia and Rad3 related                            | CCDS3124.1  | chr3_142188397-142188397_G_A  | 2112R>C | Substitution | Nonsynonymous coding | 26% |
| MM04T | ATRNL1   | attractin-like 1                                                  | CCDS7592.1  | chr10_117061443-117061443_G_T | 903G>V  | Substitution | Nonsynonymous coding | 33% |
| MM04T | ATRNL1   | attractin-like 1                                                  | CCDS7592.1  | chr10_117309033-117309033_C_T | 1261S>F | Substitution | Nonsynonymous coding | 15% |
| MM04T | ATRX     | alpha thalassemia/mental retardation syndrome X-linked            | CCDS14434.1 | chrX_76937885-76937885_T_G    | 955K>Q  | Substitution | Nonsynonymous coding | 24% |
| MM04T | ATRX     | alpha thalassemia/mental retardation syndrome X-linked            | CCDS14434.1 | chrX_76938028-76938028_C_T    | 907R>Q  | Substitution | Nonsynonymous coding | 41% |
| MM04T | ATRX     | alpha thalassemia/mental retardation syndrome X-linked            | CCDS14434.1 | chrX_76939698-76939698_T_G    | 350K>N  | Substitution | Nonsynonymous coding | 16% |
| MM04T | ATXN10   | ataxin 10                                                         | CCDS14070.1 | chr22_46239017-46239017_G_A   | 462E>K  | Substitution | Nonsynonymous coding | 33% |
| MM04T | ATXN3L   | ataxin 3-like                                                     | CCDS48080.1 | chrX_13337680-13337680_T_G    | 125K>T  | Substitution | Nonsynonymous coding | 22% |
| MM04T | ATXN7L1  | ataxin 7-like 1                                                   | CCDS34727.1 | chr7_105401888-105401888_C_A  | 126R>I  | Substitution | Nonsynonymous coding | 30% |
| MM04T | AUH      | AU RNA binding protein/enoyl-CoA hydratase                        | CCDS6689.1  | chr9_93976647-93976647_G_A    | 335R>C  | Substitution | Nonsynonymous coding | 37% |
| MM04T | AUNIP    | aurora kinase A and ninein interacting protein                    | CCDS266.1   | chr1_26163936-26163936_C_T    | 63R>K   | Substitution | Nonsynonymous coding | 32% |
| MM04T | AUNIP    | aurora kinase A and ninein interacting protein                    | CCDS266.1   | chr1_26162338-26162338_C_A    | NA      | Substitution | Splice site acceptor | 40% |
| MM04T | AURKC    | aurora kinase C                                                   | CCDS33128.1 | chr19_57743516-57743516_C_A   | 74L>I   | Substitution | Nonsynonymous coding | 22% |
| MM04T | AVEN     | apoptosis, caspase activation inhibitor                           | CCDS10030.1 | chr15_34295387-34295387_C_A   | 97E>D   | Substitution | Nonsynonymous coding | 44% |
| MM04T | AVL9     | AVL9 homolog (S. cerevisiae)                                      | CCDS34613.1 | chr7_32590971-32590971_A_C    | 133K>T  | Substitution | Nonsynonymous coding | 39% |
| MM04T | AVPR1A   | arginine vasopressin receptor 1A                                  | CCDS8965.1  | chr12_63544486-63544486_T_C   | 44D>G   | Substitution | Nonsynonymous coding | 29% |
| MM04T | AXIN1    | axin 1                                                            | CCDS10405.1 | chr16_348179-348179_C_T       | 443A>T  | Substitution | Nonsynonymous coding | 38% |
| MM04T | AXL      | AXL receptor tyrosine kinase                                      | CCDS12575.1 | chr19_41762374-41762374_C_T   | 685S>F  | Substitution | Nonsynonymous coding | 27% |
| MM04T | AXL      | AXL receptor tyrosine kinase                                      | CCDS12575.1 | chr19_41765555-41765555_C_T   | 811P>S  | Substitution | Nonsynonymous coding | 21% |

|       |          |                                                                            |                 |                               |         |              |                      |     |
|-------|----------|----------------------------------------------------------------------------|-----------------|-------------------------------|---------|--------------|----------------------|-----|
| MM04T | AZGP1    | alpha-2-glycoprotein 1, zinc-binding                                       | ENST00000411734 | chr7_99565730-99565730_C_T    | 218D>N  | Substitution | Nonsynonymous coding | 32% |
| MM04T | B3GALTL  | beta 1,3-galactosyltransferase-like                                        | CCDS9341.1      | chr13_31860916-31860916_A_C   | 342T>P  | Substitution | Nonsynonymous coding | 20% |
| MM04T | B3GAT1   | beta-1,3-glucuronyltransferase 1 (glucuronosyltransferase P)               | CCDS8500.1      | chr11_134252846-134252846_G_A | 226R>W  | Substitution | Nonsynonymous coding | 31% |
| MM04T | B3GAT1   | beta-1,3-glucuronyltransferase 1 (glucuronosyltransferase P)               | CCDS8500.1      | chr11_134257523-134257523_C_T | 11V>I   | Substitution | Nonsynonymous coding | 27% |
| MM04T | B3GNT6   | UDP-GlcNAc:betaGal beta-1,3-N-acetylglucosaminyltransferase 6 (core 3)     | NM_138706       | chr11_76750791-76750791_C_A   | 66P>T   | Substitution | Nonsynonymous coding | 26% |
| MM04T | B4GALNT2 | beta-1,4-N-acetyl-galactosaminyl transferase 2                             | CCDS11544.1     | chr17_47246889-47246889_C_A   | 500F>L  | Substitution | Nonsynonymous coding | 38% |
| MM04T | B4GALNT3 | beta-1,4-N-acetyl-galactosaminyl transferase 3                             | CCDS8504.1      | chr12_655854-655854_C_T       | 228R>W  | Substitution | Nonsynonymous coding | 36% |
| MM04T | BAAT     | bile acid CoA: amino acid N-acyltransferase (glycine N-choloyltransferase) | CCDS6752.1      | chr9_104124751-104124751_G_T  | 406L>I  | Substitution | Nonsynonymous coding | 28% |
| MM04T | BAAT     | bile acid CoA: amino acid N-acyltransferase (glycine N-choloyltransferase) | CCDS6752.1      | chr9_104133260-104133260_G_A  | 143R>X  | Substitution | Nonsense             | 22% |
| MM04T | BABAM1   | BRISC and BRCA1 A complex member 1                                         | CCDS46012.1     | chr19_17379742-17379742_G_T   | 43A>S   | Substitution | Nonsynonymous coding | 14% |
| MM04T | BACE2    | beta-site APP-cleaving enzyme 2                                            | CCDS13668.1     | chr21_42540421-42540421_C_A   | 77F>L   | Substitution | Nonsynonymous coding | 11% |
| MM04T | BACH1    | BTB and CNC homology 1, basic leucine zipper transcription factor 1        | CCDS13585.1     | chr21_30701851-30701851_G_A   | 538R>Q  | Substitution | Nonsynonymous coding | 26% |
| MM04T | BAI2     | brain-specific angiogenesis inhibitor 2                                    | CCDS346.2       | chr1_32201949-32201949_C_T    | 1058R>Q | Substitution | Nonsynonymous coding | 18% |
| MM04T | BAI3     | brain-specific angiogenesis inhibitor 3                                    | CCDS4968.1      | chr6_69640490-69640490_G_A    | 266R>Q  | Substitution | Nonsynonymous coding | 17% |
| MM04T | BAI3     | brain-specific angiogenesis inhibitor 3                                    | CCDS4968.1      | chr6_69758097-69758097_C_A    | 710P>T  | Substitution | Nonsynonymous coding | 34% |
| MM04T | BAI3     | brain-specific angiogenesis inhibitor 3                                    | CCDS4968.1      | chr6_69772894-69772894_C_T    | 801S>L  | Substitution | Nonsynonymous coding | 23% |
| MM04T | BAI3     | brain-specific angiogenesis inhibitor 3                                    | CCDS4968.1      | chr6_70071264-70071264_C_A    | 1367L>I | Substitution | Nonsynonymous coding | 38% |
| MM04T | BAI3     | brain-specific angiogenesis inhibitor 3                                    | CCDS4968.1      | chr6_70092801-70092801_C_T    | 1452R>W | Substitution | Nonsynonymous coding | 27% |
| MM04T | BAI3     | brain-specific angiogenesis inhibitor 3                                    | CCDS4968.1      | chr6_69772825-69772825_G_T    | NA      | Substitution | Splice site acceptor | 24% |
| MM04T | BAI3     | brain-specific angiogenesis inhibitor 3                                    | CCDS4968.1      | chr6_69665970-69665970_C_A    | 417S>X  | Substitution | Nonsense             | 32% |
| MM04T | BAIAP2L2 | BAI1-associated protein 2-like 2                                           | CCDS43018.1     | chr22_38494133-38494133_C_A   | 134E>D  | Substitution | Nonsynonymous coding | 19% |
| MM04T | BAP1     | BRCA1 associated protein-1 (ubiquitin carboxy-terminal hydrolase)          | CCDS2853.1      | chr3_52442528-52442528_C_A    | 73D>Y   | Substitution | Nonsynonymous coding | 22% |
| MM04T | BARD1    | BRCA1 associated RING domain 1                                             | CCDS2397.1      | chr2_215646149-215646149_C_T  | 150R>Q  | Substitution | Nonsynonymous coding | 28% |
| MM04T | BARX1    | BARX homeobox 1                                                            | CCDS35070.2     | chr9_96714456-96714456_C_T    | 252R>H  | Substitution | Nonsynonymous coding | 14% |
| MM04T | BAZ1B    | bromodomain adjacent to zinc finger domain, 1B                             | CCDS5549.1      | chr7_72891211-72891211_T_G    | 860E>D  | Substitution | Nonsynonymous coding | 35% |
| MM04T | BAZ2A    | bromodomain adjacent to zinc finger domain, 2A                             | CCDS44924.1     | chr12_57003698-57003698_C_A   | 640E>D  | Substitution | Nonsynonymous coding | 26% |
| MM04T | BAZ2B    | bromodomain adjacent to zinc finger domain, 2B                             | CCDS2209.2      | chr2_160303346-160303346_C_T  | 215E>K  | Substitution | Nonsynonymous coding | 23% |
| MM04T | BBS12    | Bardet-Biedl syndrome 12                                                   | CCDS3728.1      | chr4_123663639-123663639_G_T  | 198E>X  | Substitution | Nonsense             | 28% |
| MM04T | BBS2     | Bardet-Biedl syndrome 2                                                    | CCDS32451.1     | chr16_56536710-56536710_C_T   | 272R>Q  | Substitution | Nonsynonymous coding | 38% |
| MM04T | BBS5     | Bardet-Biedl syndrome 5                                                    | CCDS2233.1      | chr2_170344575-170344575_T_G  | 113L>V  | Substitution | Nonsynonymous coding | 20% |
| MM04T | BBS7     | Bardet-Biedl syndrome 7                                                    | CCDS3724.1      | chr4_122765083-122765083_T_G  | 435E>A  | Substitution | Nonsynonymous coding | 29% |
| MM04T | BBS9     | Bardet-Biedl syndrome 9                                                    | CCDS43566.1     | chr7_33185915-33185915_A_C    | 17K>N   | Substitution | Nonsynonymous coding | 31% |

|       |         |                                                                                      |                 |                               |         |              |                      |     |
|-------|---------|--------------------------------------------------------------------------------------|-----------------|-------------------------------|---------|--------------|----------------------|-----|
| MM04T | BCAN    | brevican                                                                             | CCDS1149.1      | chr1_156618558-156618558_G_A  | 323G>D  | Substitution | Nonsynonymous coding | 24% |
| MM04T | BCAP29  | B-cell receptor-associated protein 29                                                | CCDS34730.1     | chr7_107254120-107254120_T_G  | 238L>V  | Substitution | Nonsynonymous coding | 13% |
| MM04T | BCAS1   | breast carcinoma amplified sequence 1                                                | CCDS13444.1     | chr20_52570129-52570129_C_T   | 508E>K  | Substitution | Nonsynonymous coding | 31% |
| MM04T | BCAS1   | breast carcinoma amplified sequence 1                                                | CCDS13444.1     | chr20_52645344-52645344_G_A   | 104P>S  | Substitution | Nonsynonymous coding | 21% |
| MM04T | BCAT1   | branched chain amino-acid transaminase 1, cytosolic                                  | CCDS44845.1     | chr12_24985800-24985800_G_A   | NA      | Substitution | Splice site acceptor | 30% |
| MM04T | BCL11A  | B-cell CLL/lymphoma 11A (zinc finger protein)                                        | CCDS1862.1      | chr2_60687798-60687798_A_G    | 750V>A  | Substitution | Nonsynonymous coding | 33% |
| MM04T | BCL9    | B-cell CLL/lymphoma 9                                                                | CCDS30833.1     | chr1_147091643-147091643_G_A  | 561R>H  | Substitution | Nonsynonymous coding | 18% |
| MM04T | BCLAF1  | BCL2-associated transcription factor 1                                               | CCDS5177.1      | chr6_136597297-136597297_C_A  | 456E>X  | Substitution | Nonsense             | 19% |
| MM04T | BCO2    | beta-carotene oxygenase 2                                                            | CCDS8358.2      | chr11_112085657-112085657_A_C | 502K>T  | Substitution | Nonsynonymous coding | 37% |
| MM04T | BCOR    | BCL6 corepressor                                                                     | CCDS48093.1     | chrX_39916551-39916551_C_A    | 1484E>D | Substitution | Nonsynonymous coding | 29% |
| MM04T | BCS1L   | BC1 (ubiquinol-cytochrome c reductase) synthesis-like                                | CCDS2419.1      | chr2_219526158-219526158_G_A  | 117R>Q  | Substitution | Nonsynonymous coding | 28% |
| MM04T | BDKRB1  | bradykinin receptor B1                                                               | CCDS9943.1      | chr14_96730268-96730268_T_G   | 83D>E   | Substitution | Nonsynonymous coding | 32% |
| MM04T | BDP1    | B double prime 1, subunit of RNA polymerase III transcription initiation factor IIIB | CCDS43328.1     | chr5_70782334-70782334_G_A    | 365D>N  | Substitution | Nonsynonymous coding | 25% |
| MM04T | BDP1    | B double prime 1, subunit of RNA polymerase III transcription initiation factor IIIB | CCDS43328.1     | chr5_70791147-70791147_G_A    | 571E>K  | Substitution | Nonsynonymous coding | 22% |
| MM04T | BDP1    | B double prime 1, subunit of RNA polymerase III transcription initiation factor IIIB | ENST00000437938 | chr5_70806989-70806989_T_G    | 1357F>C | Substitution | Nonsynonymous coding | 30% |
| MM04T | BDP1    | B double prime 1, subunit of RNA polymerase III transcription initiation factor IIIB | CCDS43328.1     | chr5_70819908-70819908_C_T    | 1844R>C | Substitution | Nonsynonymous coding | 32% |
| MM04T | BEND2   | BEN domain containing 2                                                              | CCDS14184.1     | chrX_18183152-18183152_C_T    | 793D>N  | Substitution | Nonsynonymous coding | 36% |
| MM04T | BEND2   | BEN domain containing 2                                                              | CCDS14184.1     | chrX_18234847-18234847_A_C    | 11V>G   | Substitution | Nonsynonymous coding | 29% |
| MM04T | BEND2   | BEN domain containing 2                                                              | CCDS14184.1     | chrX_18221732-18221732_C_A    | 266E>X  | Substitution | Nonsense             | 36% |
| MM04T | BEST2   | bestrophin 2                                                                         | CCDS42506.1     | chr19_12864108-12864108_G_A   | 63E>K   | Substitution | Nonsynonymous coding | 32% |
| MM04T | BEST3   | bestrophin 3                                                                         | CCDS8992.2      | chr12_70071028-70071028_G_A   | 216R>X  | Substitution | Nonsense             | 21% |
| MM04T | BHLHA9  | basic helix-loop-helix family, member a9                                             | CCDS45560.1     | chr17_1174051-1174051_C_T     | 65A>V   | Substitution | Nonsynonymous coding | 34% |
| MM04T | BIRC6   | baculoviral IAP repeat containing 6                                                  | CCDS33175.2     | chr2_32750029-32750029_G_T    | 3900E>X | Substitution | Nonsense             | 24% |
| MM04T | BLMH    | bleomycin hydrolase                                                                  | CCDS32604.1     | chr17_28599913-28599913_C_G   | 269C>S  | Substitution | Nonsynonymous coding | 21% |
| MM04T | BLOC1S5 | biogenesis of lysosomal organelles complex-1, subunit 5, muted                       | CCDS4505.1      | chr6_7884636-7884636_C_T      | 378E>K  | Substitution | Nonsynonymous coding | 21% |
| MM04T | BMP10   | bone morphogenetic protein 10                                                        | CCDS1890.1      | chr2_69093441-69093441_C_A    | 199E>D  | Substitution | Nonsynonymous coding | 29% |
| MM04T | BMP2    | bone morphogenetic protein 2                                                         | CCDS13099.1     | chr20_6759270-6759270_G_T     | 242R>I  | Substitution | Nonsynonymous coding | 42% |
| MM04T | BMP5    | bone morphogenetic protein 5                                                         | CCDS4958.1      | chr6_55625290-55625290_C_T    | 357E>K  | Substitution | Nonsynonymous coding | 30% |
| MM04T | BMPRI1B | bone morphogenetic protein receptor, type IB                                         | CCDS3642.1      | chr4_96036861-96036861_G_A    | 91R>K   | Substitution | Nonsynonymous coding | 28% |
| MM04T | BMPRI2  | bone morphogenetic protein receptor, type II (serine/threonine kinase)               | CCDS33361.1     | chr2_203329668-203329668_G_T  | 71E>D   | Substitution | Nonsynonymous coding | 21% |
| MM04T | BNIP1   | BCL2/adenovirus E1B 19kDa interacting protein 1                                      | CCDS4385.1      | chr5_172590740-172590740_G_A  | 211R>Q  | Substitution | Nonsynonymous coding | 23% |
| MM04T | BOD1L1  | biorientation of chromosomes in cell division 1-like 1                               | CCDS3411.2      | chr4_13603977-13603977_G_T    | 1516S>Y | Substitution | Nonsynonymous coding | 38% |



|       |           |                                                                                            |             |                               |         |              |                      |     |
|-------|-----------|--------------------------------------------------------------------------------------------|-------------|-------------------------------|---------|--------------|----------------------|-----|
| MM04T | BRAP      | BRCA1 associated protein                                                                   | CCDS9154.1  | chr12_112082234-112082234_C_A | 516K>N  | Substitution | Nonsynonymous coding | 23% |
| MM04T | BRCA2     | breast cancer 2, early onset                                                               | CCDS9344.1  | chr13_32912628-32912628_A_G   | 1379Q>R | Substitution | Nonsynonymous coding | 21% |
| MM04T | BRCA2     | breast cancer 2, early onset                                                               | CCDS9344.1  | chr13_32915065-32915065_A_C   | 2191K>N | Substitution | Nonsynonymous coding | 28% |
| MM04T | BRCA2     | breast cancer 2, early onset                                                               | CCDS9344.1  | chr13_32915088-32915088_C_A   | 2199T>N | Substitution | Nonsynonymous coding | 24% |
| MM04T | BRCA2     | breast cancer 2, early onset                                                               | CCDS9344.1  | chr13_32921003-32921003_C_A   | 2326S>Y | Substitution | Nonsynonymous coding | 15% |
| MM04T | BRCA2     | breast cancer 2, early onset                                                               | CCDS9344.1  | chr13_32937562-32937562_G_T   | 2741K>N | Substitution | Nonsynonymous coding | 21% |
| MM04T | BRCA2     | breast cancer 2, early onset                                                               | CCDS9344.1  | chr13_32913044-32913044_G_T   | 1518E>X | Substitution | Nonsense             | 24% |
| MM04T | BRCC3     | BRCA1/BRCA2-containing complex, subunit 3                                                  | NM_024332   | chrX_154317543-154317543_C_T  | 137R>C  | Substitution | Nonsynonymous coding | 17% |
| MM04T | BRDT      | bromodomain, testis-specific                                                               | CCDS735.1   | chr1_92442676-92442676_C_A    | 232S>Y  | Substitution | Nonsynonymous coding | 18% |
| MM04T | BRPF3     | bromodomain and PHD finger containing, 3                                                   | CCDS34437.1 | chr6_36179240-36179240_G_T    | 795K>N  | Substitution | Nonsynonymous coding | 17% |
| MM04T | BRSK1     | BR serine/threonine kinase 1                                                               | CCDS12921.1 | chr19_55816913-55816913_C_T   | 617L>F  | Substitution | Nonsynonymous coding | 25% |
| MM04T | BRWD1     | bromodomain and WD repeat domain containing 1                                              | CCDS13662.1 | chr21_40559250-40559250_T_G   | 2222K>T | Substitution | Nonsynonymous coding | 25% |
| MM04T | BRWD1     | bromodomain and WD repeat domain containing 1                                              | CCDS13662.1 | chr21_40590484-40590484_C_A   | 1162R>I | Substitution | Nonsynonymous coding | 26% |
| MM04T | BRWD3     | bromodomain and WD repeat domain containing 3                                              | CCDS14447.1 | chrX_79936867-79936867_G_A    | 1543R>W | Substitution | Nonsynonymous coding | 26% |
| MM04T | BRWD3     | bromodomain and WD repeat domain containing 3                                              | CCDS14447.1 | chrX_79946573-79946573_C_T    | 1194R>K | Substitution | Nonsynonymous coding | 30% |
| MM04T | BRWD3     | bromodomain and WD repeat domain containing 3                                              | CCDS14447.1 | chrX_79971732-79971732_C_T    | 750R>Q  | Substitution | Nonsynonymous coding | 28% |
| MM04T | BSN       | bassoon presynaptic cytomatrix protein                                                     | CCDS2800.1  | chr3_49662705-49662705_G_T    | 174K>N  | Substitution | Nonsynonymous coding | 27% |
| MM04T | BSN       | bassoon presynaptic cytomatrix protein                                                     | CCDS2800.1  | chr3_49689040-49689040_G_T    | 684G>V  | Substitution | Nonsynonymous coding | 32% |
| MM04T | BSN       | bassoon presynaptic cytomatrix protein                                                     | CCDS2800.1  | chr3_49694787-49694787_C_T    | 2600R>W | Substitution | Nonsynonymous coding | 24% |
| MM04T | BST1      | bone marrow stromal cell antigen 1                                                         | CCDS3416.1  | chr4_15733397-15733397_C_A    | 296L>I  | Substitution | Nonsynonymous coding | 33% |
| MM04T | BTAF1     | BTAF1 RNA polymerase II, B-TFIID transcription factor-associated, 170kDa (Mot1 homolog, S. | CCDS7419.1  | chr10_93754309-93754309_G_A   | 1073D>N | Substitution | Nonsynonymous coding | 28% |
| MM04T | BTBD7     | BTB (POZ) domain containing 7                                                              | CCDS32146.1 | chr14_93708896-93708896_A_G   | 1041L>S | Substitution | Nonsynonymous coding | 11% |
| MM04T | BTBD7     | BTB (POZ) domain containing 7                                                              | CCDS32146.1 | chr14_93723596-93723596_G_T   | 518P>H  | Substitution | Nonsynonymous coding | 24% |
| MM04T | BTN1A1    | butyrophilin, subfamily 1, member A1                                                       | CCDS4614.1  | chr6_26507021-26507021_G_A    | 274E>K  | Substitution | Nonsynonymous coding | 30% |
| MM04T | BTN2A2    | butyrophilin, subfamily 2, member A2                                                       | CCDS4606.1  | chr6_26385525-26385525_T_G    | 126I>S  | Substitution | Nonsynonymous coding | 22% |
| MM04T | BTRC      | beta-transducin repeat containing E3 ubiquitin protein ligase                              | CCDS7512.1  | chr10_103296370-103296370_C_T | 513R>X  | Substitution | Nonsense             | 25% |
| MM04T | BUB1B     | BUB1 mitotic checkpoint serine/threonine kinase B                                          | CCDS10053.1 | chr15_40488912-40488912_G_A   | 409E>K  | Substitution | Nonsynonymous coding | 31% |
| MM04T | BVES      | blood vessel epicardial substance                                                          | CCDS5051.1  | chr6_105563646-105563646_T_G  | 291E>D  | Substitution | Nonsynonymous coding | 31% |
| MM04T | BYSL      | bystin-like                                                                                | CCDS34450.1 | chr6_41899198-41899198_C_T    | 257R>X  | Substitution | Nonsense             | 32% |
| MM04T | C10orf12  | chromosome 10 open reading frame 12                                                        | CCDS7452.1  | chr10_98742998-98742998_T_G   | 617I>M  | Substitution | Nonsynonymous coding | 25% |
| MM04T | C10orf120 | chromosome 10 open reading frame 120                                                       | CCDS31302.1 | chr10_124458855-124458855_G_T | 84L>I   | Substitution | Nonsynonymous coding | 22% |
| MM04T | C10orf128 | chromosome 10 open reading frame 128                                                       | CCDS41519.1 | chr10_50369652-50369652_G_T   | 95F>L   | Substitution | Nonsynonymous coding | 32% |

|       |           |                                      |                 |                               |         |              |                      |     |
|-------|-----------|--------------------------------------|-----------------|-------------------------------|---------|--------------|----------------------|-----|
| MM04T | C10orf137 | chromosome 10 open reading frame 137 | CCDS7646.1      | chr10_127431786-127431786_G_T | 810R>I  | Substitution | Nonsynonymous coding | 38% |
| MM04T | C10orf137 | chromosome 10 open reading frame 137 | CCDS7646.1      | chr10_127424429-127424429_G_T | 538E>X  | Substitution | Nonsense             | 36% |
| MM04T | C10orf68  | chromosome 10 open reading frame 68  | CCDS31177.1     | chr10_32978065-32978065_G_T   | 80R>I   | Substitution | Nonsynonymous coding | 20% |
| MM04T | C10orf71  | chromosome 10 open reading frame 71  | CCDS44387.1     | chr10_50532681-50532681_C_A   | 697F>L  | Substitution | Nonsynonymous coding | 32% |
| MM04T | C10orf90  | chromosome 10 open reading frame 90  | CCDS31310.1     | chr10_128153387-128153387_C_A | 471R>I  | Substitution | Nonsynonymous coding | 21% |
| MM04T | C10orf90  | chromosome 10 open reading frame 90  | CCDS31310.1     | chr10_128193282-128193282_G_T | 163L>M  | Substitution | Nonsynonymous coding | 15% |
| MM04T | C10orf90  | chromosome 10 open reading frame 90  | CCDS31310.1     | chr10_128202484-128202484_C_A | 16R>I   | Substitution | Nonsynonymous coding | 31% |
| MM04T | C11orf16  | chromosome 11 open reading frame 16  | CCDS7794.1      | chr11_8947210-8947210_G_T     | 335S>Y  | Substitution | Nonsynonymous coding | 24% |
| MM04T | C11orf65  | chromosome 11 open reading frame 65  | CCDS8340.1      | chr11_108302505-108302505_G_A | 48R>C   | Substitution | Nonsynonymous coding | 15% |
| MM04T | C12orf40  | chromosome 12 open reading frame 40  | CCDS41770.1     | chr12_40076567-40076567_C_A   | 281L>I  | Substitution | Nonsynonymous coding | 31% |
| MM04T | C12orf40  | chromosome 12 open reading frame 40  | CCDS41770.1     | chr12_40114750-40114750_G_T   | 552E>D  | Substitution | Nonsynonymous coding | 23% |
| MM04T | C12orf42  | chromosome 12 open reading frame 42  | CCDS44963.1     | chr12_103695994-103695994_C_A | 325K>N  | Substitution | Nonsynonymous coding | 38% |
| MM04T | C12orf42  | chromosome 12 open reading frame 42  | CCDS44963.1     | chr12_103699756-103699756_A_T | 209N>K  | Substitution | Nonsynonymous coding | 42% |
| MM04T | C12orf50  | chromosome 12 open reading frame 50  | CCDS9031.1      | chr12_88380143-88380143_T_C   | 290R>G  | Substitution | Nonsynonymous coding | 17% |
| MM04T | C12orf55  | chromosome 12 open reading frame 55  | CCDS9062.1      | chr12_97051678-97051678_G_T   | 132E>X  | Substitution | Nonsense             | 26% |
| MM04T | C12orf69  | chromosome 12 open reading frame 69  | CCDS41759.1     | chr12_14959262-14959262_G_A   | 118S>L  | Substitution | Nonsynonymous coding | 40% |
| MM04T | C14orf105 | chromosome 14 open reading frame 105 | CCDS9730.1      | chr14_57938195-57938195_G_T   | 257L>I  | Substitution | Nonsynonymous coding | 22% |
| MM04T | C14orf164 | chromosome 14 open reading frame 164 | ENST00000399910 | chr14_23729104-23729104_T_C   | 119V>A  | Substitution | Nonsynonymous coding | 26% |
| MM04T | C14orf37  | chromosome 14 open reading frame 37  | CCDS32089.1     | chr14_58599950-58599950_C_A   | 493K>N  | Substitution | Nonsynonymous coding | 27% |
| MM04T | C14orf37  | chromosome 14 open reading frame 37  | CCDS32089.1     | chr14_58605917-58605917_C_A   | 54D>Y   | Substitution | Nonsynonymous coding | 34% |
| MM04T | C14orf79  | chromosome 14 open reading frame 79  | CCDS42000.1     | chr14_105457918-105457918_G_T | 220E>D  | Substitution | Nonsynonymous coding | 15% |
| MM04T | C15orf27  | chromosome 15 open reading frame 27  | CCDS10289.2     | chr15_76430170-76430170_C_T   | 54A>V   | Substitution | Nonsynonymous coding | 20% |
| MM04T | C15orf39  | chromosome 15 open reading frame 39  | CCDS10276.1     | chr15_75499036-75499036_A_C   | 216K>T  | Substitution | Nonsynonymous coding | 21% |
| MM04T | C15orf41  | chromosome 15 open reading frame 41  | CCDS45215.1     | chr15_36872166-36872166_A_C   | NA      | Substitution | Splice site donor    | 35% |
| MM04T | C15orf54  | chromosome 15 open reading frame 54  | CCDS10049.1     | chr15_39544348-39544348_A_T   | 4K>N    | Substitution | Nonsynonymous coding | 34% |
| MM04T | C15orf55  | chromosome 15 open reading frame 55  | CCDS32190.1     | chr15_34649305-34649305_G_T   | 1004E>D | Substitution | Nonsynonymous coding | 27% |
| MM04T | C15orf57  | chromosome 15 open reading frame 57  | CCDS42022.1     | chr15_40854976-40854976_G_T   | 89S>Y   | Substitution | Nonsynonymous coding | 27% |
| MM04T | C16orf59  | chromosome 16 open reading frame 59  | CCDS10468.2     | chr16_2510670-2510670_A_G     | 58T>A   | Substitution | Nonsynonymous coding | 25% |
| MM04T | C16orf87  | chromosome 16 open reading frame 87  | CCDS10724.1     | chr16_46843581-46843581_C_A   | 94D>Y   | Substitution | Nonsynonymous coding | 20% |
| MM04T | C16orf88  | chromosome 16 open reading frame 88  | CCDS42127.1     | chr16_19725580-19725580_C_A   | 260D>Y  | Substitution | Nonsynonymous coding | 28% |
| MM04T | C16orf96  | chromosome 16 open reading frame 96  | ENST00000382019 | chr16_4624984-4624984_G_T     | 206Q>H  | Substitution | Nonsynonymous coding | 29% |
| MM04T | C17orf112 | chromosome 17 open reading frame 112 | ENST00000441889 | chr17_51064055-51064055_G_T   | 64E>X   | Substitution | Nonsense             | 32% |

|       |          |                                                 |                 |                              |        |              |                      |     |
|-------|----------|-------------------------------------------------|-----------------|------------------------------|--------|--------------|----------------------|-----|
| MM04T | C17orf58 | chromosome 17 open reading frame 58             | CCDS42375.1     | chr17_65989139-65989139_C_T  | 42D>N  | Substitution | Nonsynonymous coding | 43% |
| MM04T | C17orf64 | chromosome 17 open reading frame 64             | CCDS32698.2     | chr17_58506735-58506735_G_A  | 148A>T | Substitution | Nonsynonymous coding | 27% |
| MM04T | C17orf85 | chromosome 17 open reading frame 85             | CCDS45578.1     | chr17_3743450-3743450_G_A    | 100S>L | Substitution | Nonsynonymous coding | 19% |
| MM04T | C18orf54 | chromosome 18 open reading frame 54             | CCDS11956.1     | chr18_51886981-51886981_G_T  | 13Q>H  | Substitution | Nonsynonymous coding | 21% |
| MM04T | C18orf63 | chromosome 18 open reading frame 63             | ENST00000382675 | chr18_72009290-72009290_A_C  | 212N>T | Substitution | Nonsynonymous coding | 35% |
| MM04T | C18orf63 | chromosome 18 open reading frame 63             | ENST00000382675 | chr18_72020580-72020580_C_A  | 360L>I | Substitution | Nonsynonymous coding | 23% |
| MM04T | C18orf63 | chromosome 18 open reading frame 63             | ENST00000382675 | chr18_72021708-72021708_A_C  | 673K>T | Substitution | Nonsynonymous coding | 28% |
| MM04T | C18orf8  | chromosome 18 open reading frame 8              | CCDS32803.1     | chr18_21109612-21109612_A_C  | 477K>T | Substitution | Nonsynonymous coding | 21% |
| MM04T | C19orf38 | chromosome 19 open reading frame 38             | CCDS45970.1     | chr19_10970598-10970598_G_T  | 157E>X | Substitution | Nonsense             | 28% |
| MM04T | C19orf44 | chromosome 19 open reading frame 44             | CCDS12345.1     | chr19_16611746-16611746_G_T  | 48S>I  | Substitution | Nonsynonymous coding | 29% |
| MM04T | C19orf57 | chromosome 19 open reading frame 57             | CCDS12299.1     | chr19_14000064-14000064_G_T  | 535F>L | Substitution | Nonsynonymous coding | 20% |
| MM04T | C19orf68 | chromosome 19 open reading frame 68             | ENST00000328759 | chr19_48698452-48698452_C_A  | 377F>L | Substitution | Nonsynonymous coding | 27% |
| MM04T | C19orf70 | chromosome 19 open reading frame 70             | CCDS12143.1     | chr19_5678609-5678609_C_T    | 104E>K | Substitution | Nonsynonymous coding | 38% |
| MM04T | C1orf101 | chromosome 1 open reading frame 101             | CCDS44340.1     | chr1_244640855-244640855_T_C | 43Y>H  | Substitution | Nonsynonymous coding | 23% |
| MM04T | C1orf106 | chromosome 1 open reading frame 106             | CCDS1406.1      | chr1_200868629-200868629_G_T | 113K>N | Substitution | Nonsynonymous coding | 14% |
| MM04T | C1orf116 | chromosome 1 open reading frame 116             | CCDS1475.1      | chr1_207196264-207196264_G_A | 282S>L | Substitution | Nonsynonymous coding | 19% |
| MM04T | C1orf131 | chromosome 1 open reading frame 131             | CCDS1591.2      | chr1_231374800-231374800_T_C | 85K>E  | Substitution | Nonsynonymous coding | 35% |
| MM04T | C1orf137 | chromosome 1 open reading frame 137             | ENST00000369482 | chr1_117236768-117236768_C_A | 6S>Y   | Substitution | Nonsynonymous coding | 19% |
| MM04T | C1orf158 | chromosome 1 open reading frame 158             | CCDS147.1       | chr1_12820816-12820816_G_A   | 173A>T | Substitution | Nonsynonymous coding | 19% |
| MM04T | C1orf168 | chromosome 1 open reading frame 168             | CCDS30729.1     | chr1_57206385-57206385_G_A   | 563S>L | Substitution | Nonsynonymous coding | 14% |
| MM04T | C1orf170 | chromosome 1 open reading frame 170             | ENST00000433179 | chr1_915823-915823_G_A       | 102T>I | Substitution | Nonsynonymous coding | 46% |
| MM04T | C1orf173 | chromosome 1 open reading frame 173             | CCDS30755.1     | chr1_75086571-75086571_A_T   | 283L>I | Substitution | Nonsynonymous coding | 33% |
| MM04T | C1orf180 | chromosome 1 open reading frame 180             | ENST00000327308 | chr1_85096317-85096317_G_T   | 118L>M | Substitution | Nonsynonymous coding | 21% |
| MM04T | C1orf180 | chromosome 1 open reading frame 180             | ENST00000327308 | chr1_85096451-85096451_C_T   | 73R>K  | Substitution | Nonsynonymous coding | 32% |
| MM04T | C1orf196 | chromosome 1 open reading frame 196             | ENST00000401953 | chr1_14220177-14220177_C_T   | 16A>V  | Substitution | Nonsynonymous coding | 23% |
| MM04T | C1orf228 | chromosome 1 open reading frame 228             | NM_001145636    | chr1_45166669-45166669_G_T   | 173D>Y | Substitution | Nonsynonymous coding | 30% |
| MM04T | C1orf228 | chromosome 1 open reading frame 228             | NM_001145636    | chr1_45191016-45191016_G_A   | 422D>N | Substitution | Nonsynonymous coding | 35% |
| MM04T | C1QB     | complement component 1, q subcomponent, B chain | CCDS228.1       | chr1_22987325-22987325_G_T   | 70D>Y  | Substitution | Nonsynonymous coding | 18% |
| MM04T | C1QL2    | complement component 1, q subcomponent-like 2   | CCDS42737.1     | chr2_119914405-119914405_G_T | 279F>L | Substitution | Nonsynonymous coding | 29% |
| MM04T | C1QTNF3  | C1q and tumor necrosis factor related protein 3 | CCDS3902.1      | chr5_33989592-33989592_G_T   | 252S>Y | Substitution | Nonsynonymous coding | 31% |
| MM04T | C1QTNF3  | C1q and tumor necrosis factor related protein 3 | CCDS3902.1      | chr5_33998765-33998765_G_T   | 240F>L | Substitution | Nonsynonymous coding | 36% |
| MM04T | C1QTNF3  | C1q and tumor necrosis factor related protein 3 | CCDS34141.1     | chr5_34020767-34020767_C_T   | 294R>Q | Substitution | Nonsynonymous coding | 32% |

|       |           |                                                 |                 |                              |         |              |                      |     |
|-------|-----------|-------------------------------------------------|-----------------|------------------------------|---------|--------------|----------------------|-----|
| MM04T | C1QTNF3   | C1q and tumor necrosis factor related protein 3 | CCDS34141.1     | chr5_34035800-34035800_G_A   | 123R>X  | Substitution | Nonsense             | 32% |
| MM04T | C1QTNF8   | C1q and tumor necrosis factor related protein 8 | CCDS32358.1     | chr16_1144022-1144022_G_A    | 80R>W   | Substitution | Nonsynonymous coding | 48% |
| MM04T | C20orf194 | chromosome 20 open reading frame 194            | CCDS42851.1     | chr20_3234400-3234400_G_T    | 1131F>L | Substitution | Nonsynonymous coding | 35% |
| MM04T | C20orf194 | chromosome 20 open reading frame 194            | CCDS42851.1     | chr20_3321242-3321242_C_T    | 297R>Q  | Substitution | Nonsynonymous coding | 31% |
| MM04T | C20orf26  | chromosome 20 open reading frame 26             | CCDS33447.1     | chr20_20232400-20232400_A_G  | 774Q>R  | Substitution | Nonsynonymous coding | 44% |
| MM04T | C21orf128 | chromosome 21 open reading frame 128            | ENST00000329015 | chr21_43523810-43523810_C_A  | 141Q>H  | Substitution | Nonsynonymous coding | 34% |
| MM04T | C21orf59  | chromosome 21 open reading frame 59             | CCDS13617.1     | chr21_33982298-33982298_C_T  | 53E>K   | Substitution | Nonsynonymous coding | 23% |
| MM04T | C21orf67  | chromosome 21 open reading frame 67             | ENST00000330551 | chr21_46354803-46354803_G_T  | 180S>Y  | Substitution | Nonsynonymous coding | 21% |
| MM04T | C21orf91  | chromosome 21 open reading frame 91             | CCDS42907.1     | chr21_19167581-19167581_G_A  | 224S>L  | Substitution | Nonsynonymous coding | 25% |
| MM04T | C22orf31  | chromosome 22 open reading frame 31             | CCDS13848.1     | chr22_29456594-29456594_G_T  | 81L>I   | Substitution | Nonsynonymous coding | 21% |
| MM04T | C2CD3     | C2 calcium-dependent domain containing 3        | ENST00000334126 | chr11_73745122-73745122_G_T  | 2028S>X | Substitution | Nonsense             | 34% |
| MM04T | C2CD4C    | C2 calcium-dependent domain containing 4C       | CCDS45890.1     | chr19_407529-407529_C_T      | 278R>H  | Substitution | Nonsynonymous coding | 16% |
| MM04T | C2orf16   | chromosome 2 open reading frame 16              | CCDS42666.1     | chr2_27800099-27800099_C_A   | 220F>L  | Substitution | Nonsynonymous coding | 26% |
| MM04T | C2orf16   | chromosome 2 open reading frame 16              | CCDS42666.1     | chr2_27801729-27801729_G_T   | 764A>S  | Substitution | Nonsynonymous coding | 29% |
| MM04T | C2orf16   | chromosome 2 open reading frame 16              | CCDS42666.1     | chr2_27803380-27803380_C_A   | 1314P>H | Substitution | Nonsynonymous coding | 26% |
| MM04T | C2orf16   | chromosome 2 open reading frame 16              | CCDS42666.1     | chr2_27800898-27800898_G_T   | 487E>X  | Substitution | Nonsense             | 32% |
| MM04T | C2orf53   | chromosome 2 open reading frame 53              | CCDS1739.1      | chr2_27361187-27361187_T_C   | 4Q>R    | Substitution | Nonsynonymous coding | 20% |
| MM04T | C2orf71   | chromosome 2 open reading frame 71              | CCDS42669.1     | chr2_29295603-29295603_T_C   | 509T>A  | Substitution | Nonsynonymous coding | 33% |
| MM04T | C2orf80   | chromosome 2 open reading frame 80              | ENST00000451342 | chr2_209030493-209030493_G_T | 130F>L  | Substitution | Nonsynonymous coding | 35% |
| MM04T | C3        | complement component 3                          | CCDS32883.1     | chr19_6697782-6697782_C_T    | 822E>K  | Substitution | Nonsynonymous coding | 17% |
| MM04T | C3orf35   | chromosome 3 open reading frame 35              | CCDS43065.1     | chr3_37458846-37458846_G_A   | 30R>Q   | Substitution | Nonsynonymous coding | 26% |
| MM04T | C3orf58   | chromosome 3 open reading frame 58              | CCDS3130.1      | chr3_143704565-143704565_G_T | 280E>X  | Substitution | Nonsense             | 35% |
| MM04T | C3orf70   | chromosome 3 open reading frame 70              | CCDS33900.1     | chr3_184801040-184801040_A_T | 170S>T  | Substitution | Nonsynonymous coding | 39% |
| MM04T | C4BPA     | complement component 4 binding protein, alpha   | CCDS1477.1      | chr1_207297598-207297598_C_A | 198S>Y  | Substitution | Nonsynonymous coding | 21% |
| MM04T | C4orf21   | chromosome 4 open reading frame 21              | NM_018392       | chr4_113460725-113460725_G_T | 2098S>Y | Substitution | Nonsynonymous coding | 33% |
| MM04T | C4orf21   | chromosome 4 open reading frame 21              | NM_018392       | chr4_113479416-113479416_G_T | 1670F>L | Substitution | Nonsynonymous coding | 32% |
| MM04T | C4orf21   | chromosome 4 open reading frame 21              | NM_018392       | chr4_113506809-113506809_A_C | 1330F>C | Substitution | Nonsynonymous coding | 24% |
| MM04T | C4orf29   | chromosome 4 open reading frame 29              | CCDS47131.1     | chr4_128949778-128949778_C_A | 283S>Y  | Substitution | Nonsynonymous coding | 26% |
| MM04T | C5orf34   | chromosome 5 open reading frame 34              | NM_198566       | chr5_43506369-43506369_C_A   | 138R>I  | Substitution | Nonsynonymous coding | 23% |
| MM04T | C5orf34   | chromosome 5 open reading frame 34              | NM_198566       | chr5_43508747-43508747_C_A   | 73D>Y   | Substitution | Nonsynonymous coding | 21% |
| MM04T | C5orf51   | chromosome 5 open reading frame 51              | CCDS34151.1     | chr5_41909953-41909953_G_T   | 105E>X  | Substitution | Nonsense             | 14% |
| MM04T | C5orf51   | chromosome 5 open reading frame 51              | CCDS34151.1     | chr5_41917288-41917288_G_T   | 258E>X  | Substitution | Nonsense             | 24% |

|       |          |                                                                |                 |                              |         |              |                      |     |
|-------|----------|----------------------------------------------------------------|-----------------|------------------------------|---------|--------------|----------------------|-----|
| MM04T | C6orf118 | chromosome 6 open reading frame 118                            | CCDS5288.1      | chr6_165703533-165703533_C_A | 382D>Y  | Substitution | Nonsynonymous coding | 36% |
| MM04T | C6orf15  | chromosome 6 open reading frame 15                             | CCDS4693.1      | chr6_31079444-31079444_G_T   | 231P>H  | Substitution | Nonsynonymous coding | 24% |
| MM04T | C6orf201 | chromosome 6 open reading frame 201                            | CCDS43419.1     | chr6_4099276-4099276_G_T     | 43R>I   | Substitution | Nonsynonymous coding | 20% |
| MM04T | C6orf211 | chromosome 6 open reading frame 211                            | CCDS5233.1      | chr6_151785698-151785698_C_A | 168T>N  | Substitution | Nonsynonymous coding | 38% |
| MM04T | C6orf25  | chromosome 6 open reading frame 25                             | CCDS34406.1     | chr6_31692529-31692529_C     | NA      | Insertion    | Frameshift           | 21% |
| MM04T | C7       | complement component 7                                         | CCDS47201.1     | chr5_40937769-40937769_A_C   | 182N>H  | Substitution | Nonsynonymous coding | 30% |
| MM04T | C7orf31  | chromosome 7 open reading frame 31                             | CCDS5394.1      | chr7_25198153-25198153_G_T   | NA      | Substitution | Splice site acceptor | 25% |
| MM04T | C7orf49  | chromosome 7 open reading frame 49                             | CCDS5838.2      | chr7_134851388-134851388_T_C | 150Y>C  | Substitution | Nonsynonymous coding | 32% |
| MM04T | C7orf63  | chromosome 7 open reading frame 63                             | CCDS43613.1     | chr7_89917641-89917641_C_A   | 584L>I  | Substitution | Nonsynonymous coding | 19% |
| MM04T | C8B      | complement component 8, beta polypeptide                       | CCDS30730.1     | chr1_57417816-57417816_G_T   | 191L>I  | Substitution | Nonsynonymous coding | 22% |
| MM04T | C8orf47  | chromosome 8 open reading frame 47                             | CCDS34929.1     | chr8_99101635-99101635_G_T   | 130K>N  | Substitution | Nonsynonymous coding | 29% |
| MM04T | C8orf58  | chromosome 8 open reading frame 58                             | CCDS34862.1     | chr8_22459512-22459512_G_T   | 229A>S  | Substitution | Nonsynonymous coding | 22% |
| MM04T | C8orf76  | chromosome 8 open reading frame 76                             | CCDS6341.1      | chr8_124238781-124238781_C_A | 303G>W  | Substitution | Nonsynonymous coding | 26% |
| MM04T | C9orf135 | chromosome 9 open reading frame 135                            | CCDS35041.1     | chr9_72459484-72459484_G_T   | 68E>D   | Substitution | Nonsynonymous coding | 27% |
| MM04T | C9orf152 | chromosome 9 open reading frame 152                            | CCDS35102.2     | chr9_112963361-112963361_A_C | 196F>C  | Substitution | Nonsynonymous coding | 33% |
| MM04T | C9orf174 | chromosome 9 open reading frame 174                            | ENST00000375202 | chr9_100109611-100109611_C_A | 882F>L  | Substitution | Nonsynonymous coding | 36% |
| MM04T | C9orf174 | chromosome 9 open reading frame 174                            | CCDS35077.1     | chr9_100116887-100116887_A_C | 1028E>D | Substitution | Nonsynonymous coding | 36% |
| MM04T | C9orf3   | chromosome 9 open reading frame 3                              | ENST00000375316 | chr9_97768326-97768326_G_T   | 139K>N  | Substitution | Nonsynonymous coding | 40% |
| MM04T | C9orf41  | chromosome 9 open reading frame 41                             | CCDS6649.1      | chr9_77632174-77632174_C_A   | 141E>X  | Substitution | Nonsense             | 28% |
| MM04T | C9orf72  | chromosome 9 open reading frame 72                             | CCDS6522.1      | chr9_27566800-27566800_G_A   | 107R>C  | Substitution | Nonsynonymous coding | 30% |
| MM04T | C9orf84  | chromosome 9 open reading frame 84                             | CCDS6781.3      | chr9_114464413-114464413_A_C | 957L>V  | Substitution | Nonsynonymous coding | 50% |
| MM04T | C9orf84  | chromosome 9 open reading frame 84                             | CCDS6781.3      | chr9_114468869-114468869_G_T | 842L>I  | Substitution | Nonsynonymous coding | 47% |
| MM04T | C9orf84  | chromosome 9 open reading frame 84                             | CCDS6781.3      | chr9_114490010-114490010_C_A | 515E>D  | Substitution | Nonsynonymous coding | 34% |
| MM04T | C9orf84  | chromosome 9 open reading frame 84                             | CCDS6781.3      | chr9_114490190-114490190_G_T | 455F>L  | Substitution | Nonsynonymous coding | 16% |
| MM04T | C9orf84  | chromosome 9 open reading frame 84                             | ENST00000374283 | chr9_114548272-114548272_C_T | 30R>Q   | Substitution | Nonsynonymous coding | 14% |
| MM04T | C9orf85  | chromosome 9 open reading frame 85                             | CCDS6639.1      | chr9_74561973-74561973_C_A   | 52L>I   | Substitution | Nonsynonymous coding | 23% |
| MM04T | CA10     | carbonic anhydrase X                                           | CCDS32684.1     | chr17_50149693-50149693_C_A  | 41G>V   | Substitution | Nonsynonymous coding | 18% |
| MM04T | CA13     | carbonic anhydrase XIII                                        | CCDS6236.1      | chr8_86180833-86180833_C_A   | 216P>T  | Substitution | Nonsynonymous coding | 26% |
| MM04T | CA3      | carbonic anhydrase III, muscle specific                        | CCDS6238.1      | chr8_86354340-86354340_C_T   | 91R>C   | Substitution | Nonsynonymous coding | 35% |
| MM04T | CACHD1   | cache domain containing 1                                      | CCDS628.2       | chr1_65107570-65107570_A_C   | 307K>N  | Substitution | Nonsynonymous coding | 39% |
| MM04T | CACHD1   | cache domain containing 1                                      | CCDS628.2       | chr1_65129446-65129446_A_C   | 623T>P  | Substitution | Nonsynonymous coding | 31% |
| MM04T | CACNA1A  | calcium channel, voltage-dependent, P/Q type, alpha 1A subunit | CCDS45998.1     | chr19_133345768-13345768_C_A | 1739R>L | Substitution | Nonsynonymous coding | 23% |

|       |          |                                                                                  |             |                               |         |              |                      |     |
|-------|----------|----------------------------------------------------------------------------------|-------------|-------------------------------|---------|--------------|----------------------|-----|
| MM04T | CACNA1A  | calcium channel, voltage-dependent, P/Q type, alpha 1A subunit                   | CCDS45998.1 | chr19_13363807-13363807_G_T   | 1622L>M | Substitution | Nonsynonymous coding | 22% |
| MM04T | CACNA1A  | calcium channel, voltage-dependent, P/Q type, alpha 1A subunit                   | CCDS45998.1 | chr19_13368351-13368351_G_A   | 1468S>L | Substitution | Nonsynonymous coding | 23% |
| MM04T | CACNA1A  | calcium channel, voltage-dependent, P/Q type, alpha 1A subunit                   | CCDS45998.1 | chr19_13411445-13411445_G_A   | 733A>V  | Substitution | Nonsynonymous coding | 29% |
| MM04T | CACNA1B  | calcium channel, voltage-dependent, N type, alpha 1B subunit                     | NM_000718   | chr9_140943765-140943765_C_A  | 1236F>L | Substitution | Nonsynonymous coding | 22% |
| MM04T | CACNA1B  | calcium channel, voltage-dependent, N type, alpha 1B subunit                     | NM_000718   | chr9_140954105-140954105_G_T  | NA      | Substitution | Splice site acceptor | 29% |
| MM04T | CACNA1B  | calcium channel, voltage-dependent, N type, alpha 1B subunit                     | NM_000718   | chr9_140850229-140850229_G_T  | 384E>X  | Substitution | Nonsense             | 24% |
| MM04T | CACNA1C  | calcium channel, voltage-dependent, L type, alpha 1C subunit                     | CCDS44788.1 | chr12_2566785-2566785_C_A     | 224L>I  | Substitution | Nonsynonymous coding | 20% |
| MM04T | CACNA1C  | calcium channel, voltage-dependent, L type, alpha 1C subunit                     | CCDS44788.1 | chr12_2783740-2783740_C_T     | 1635A>V | Substitution | Nonsynonymous coding | 20% |
| MM04T | CACNA1D  | calcium channel, voltage-dependent, L type, alpha 1D subunit                     | CCDS2872.1  | chr3_53531413-53531413_G_A    | 101R>Q  | Substitution | Nonsynonymous coding | 20% |
| MM04T | CACNA1D  | calcium channel, voltage-dependent, L type, alpha 1D subunit                     | CCDS2872.1  | chr3_53736669-53736669_G_T    | 408E>X  | Substitution | Nonsense             | 31% |
| MM04T | CACNA1D  | calcium channel, voltage-dependent, L type, alpha 1D subunit                     | CCDS2872.1  | chr3_53845407-53845407_G_T    | 2174E>X | Substitution | Nonsense             | 23% |
| MM04T | CACNA1E  | calcium channel, voltage-dependent, R type, alpha 1E subunit                     | NM_000721   | chr1_181702154-181702154_G_T  | 978A>S  | Substitution | Nonsynonymous coding | 14% |
| MM04T | CACNA1F  | calcium channel, voltage-dependent, L type, alpha 1F subunit                     | CCDS35253.1 | chrX_49071664-49071664_C_T    | 1171R>H | Substitution | Nonsynonymous coding | 31% |
| MM04T | CACNA1F  | calcium channel, voltage-dependent, L type, alpha 1F subunit                     | CCDS35253.1 | chrX_49075868-49075868_A_G    | 873F>S  | Substitution | Nonsynonymous coding | 39% |
| MM04T | CACNA1F  | calcium channel, voltage-dependent, L type, alpha 1F subunit                     | CCDS35253.1 | chrX_49086744-49086744_G_A    | 252A>V  | Substitution | Nonsynonymous coding | 20% |
| MM04T | CACNA1G  | calcium channel, voltage-dependent, T type, alpha 1G subunit                     | CCDS45730.1 | chr17_48676991-48676991_C_T   | 1154A>V | Substitution | Nonsynonymous coding | 18% |
| MM04T | CACNA1I  | calcium channel, voltage-dependent, T type, alpha 1I subunit                     | CCDS46710.1 | chr22_40078593-40078593_G_T   | 1919E>D | Substitution | Nonsynonymous coding | 32% |
| MM04T | CACNA2D3 | calcium channel, voltage-dependent, alpha 2/delta subunit 3                      | NM_018398   | chr3_55108143-55108143_G_T    | 1062E>D | Substitution | Nonsynonymous coding | 28% |
| MM04T | CACNA2D3 | calcium channel, voltage-dependent, alpha 2/delta subunit 3                      | NM_018398   | chr3_54921994-54921994_G_T    | 689E>X  | Substitution | Nonsense             | 30% |
| MM04T | CACNA2D4 | calcium channel, voltage-dependent, alpha 2/delta subunit 4                      | CCDS44785.1 | chr12_1988975-1988975_C_T     | 520E>K  | Substitution | Nonsynonymous coding | 45% |
| MM04T | CACNA2D4 | calcium channel, voltage-dependent, alpha 2/delta subunit 4                      | CCDS44785.1 | chr12_1904843-1904843_C_A     | 1073E>X | Substitution | Nonsense             | 22% |
| MM04T | CACNA2D4 | calcium channel, voltage-dependent, alpha 2/delta subunit 4                      | CCDS44785.1 | chr12_1967779-1967779_C_A     | 658E>X  | Substitution | Nonsense             | 26% |
| MM04T | CACNB2   | calcium channel, voltage-dependent, beta 2 subunit                               | CCDS41494.1 | chr10_18629886-18629886_A_G   | 11T>A   | Substitution | Nonsynonymous coding | 37% |
| MM04T | CACNB2   | calcium channel, voltage-dependent, beta 2 subunit                               | CCDS7129.1  | chr10_18690019-18690019_C_A   | 20S>Y   | Substitution | Nonsynonymous coding | 37% |
| MM04T | CACNB2   | calcium channel, voltage-dependent, beta 2 subunit                               | CCDS7125.1  | chr10_18825052-18825052_C_A   | 410S>Y  | Substitution | Nonsynonymous coding | 24% |
| MM04T | CACNB3   | calcium channel, voltage-dependent, beta 3 subunit                               | CCDS8769.1  | chr12_49220561-49220561_G_A   | 305R>H  | Substitution | Nonsynonymous coding | 26% |
| MM04T | CACNB4   | calcium channel, voltage-dependent, beta 4 subunit                               | CCDS46426.1 | chr2_152695838-152695838_C_T  | 453R>Q  | Substitution | Nonsynonymous coding | 31% |
| MM04T | CACNG3   | calcium channel, voltage-dependent, gamma subunit 3                              | CCDS10620.1 | chr16_24373140-24373140_T_C   | 302S>P  | Substitution | Nonsynonymous coding | 37% |
| MM04T | CACNG4   | calcium channel, voltage-dependent, gamma subunit 4                              | CCDS11667.1 | chr17_65026692-65026692_T_C   | 186Y>H  | Substitution | Nonsynonymous coding | 21% |
| MM04T | CACNG5   | calcium channel, voltage-dependent, gamma subunit 5                              | CCDS11666.1 | chr17_64880752-64880752_G_A   | 182A>T  | Substitution | Nonsynonymous coding | 35% |
| MM04T | CACUL1   | CDK2-associated, cullin domain 1                                                 | CCDS41570.1 | chr10_120460887-120460887_C_A | 243D>Y  | Substitution | Nonsynonymous coding | 22% |
| MM04T | CAD      | carbamoyl-phosphate synthetase 2, aspartate transcarbamylase, and dihydroorotase | CCDS1742.1  | chr2_27465530-27465530_T_G    | 2089S>A | Substitution | Nonsynonymous coding | 21% |

|       |         |                                                                   |                 |                               |         |              |                      |     |
|-------|---------|-------------------------------------------------------------------|-----------------|-------------------------------|---------|--------------|----------------------|-----|
| MM04T | CADM3   | cell adhesion molecule 3                                          | CCDS1182.1      | chr1_159162383-159162383_G_A  | 116R>Q  | Substitution | Nonsynonymous coding | 34% |
| MM04T | CADPS2  | Ca <sup>++</sup> -dependent secretion activator 2                 | CCDS47691.1     | chr7_121985675-121985675_G_A  | 1148L>F | Substitution | Nonsynonymous coding | 32% |
| MM04T | CAGE1   | cancer antigen 1                                                  | ENST00000379918 | chr6_7387309-7387309_G_A      | 33S>L   | Substitution | Nonsynonymous coding | 30% |
| MM04T | CALCR   | calcitonin receptor                                               | CCDS5631.1      | chr7_93067568-93067568_G_A    | 273P>S  | Substitution | Nonsynonymous coding | 31% |
| MM04T | CALCR   | calcitonin receptor                                               | CCDS5631.1      | chr7_93073013-93073013_G_T    | 235F>L  | Substitution | Nonsynonymous coding | 25% |
| MM04T | CALR3   | calreticulin 3                                                    | CCDS12344.1     | chr19_16596013-16596013_C_A   | 151K>N  | Substitution | Nonsynonymous coding | 52% |
| MM04T | CALR3   | calreticulin 3                                                    | CCDS12344.1     | chr19_16606654-16606654_C_A   | 34R>I   | Substitution | Nonsynonymous coding | 38% |
| MM04T | CAMK1D  | calcium/calmodulin-dependent protein kinase ID                    | CCDS7091.1      | chr10_12870801-12870801_C_A   | 358S>Y  | Substitution | Nonsynonymous coding | 27% |
| MM04T | CAMK2A  | calcium/calmodulin-dependent protein kinase II alpha              | CCDS43387.1     | chr5_149636182-149636182_G_A  | 122A>V  | Substitution | Nonsynonymous coding | 13% |
| MM04T | CAMP    | cathelicidin antimicrobial peptide                                | CCDS2762.1      | chr3_48265135-48265135_G_A    | 45G>D   | Substitution | Nonsynonymous coding | 25% |
| MM04T | CAMP    | cathelicidin antimicrobial peptide                                | CCDS2762.1      | chr3_48266856-48266856_G_T    | 152R>I  | Substitution | Nonsynonymous coding | 31% |
| MM04T | CAMSAP1 | calmodulin regulated spectrin-associated protein 1                | CCDS35176.2     | chr9_138713151-138713151_C_T  | 1119R>Q | Substitution | Nonsynonymous coding | 23% |
| MM04T | CAMSAP2 | calmodulin regulated spectrin-associated protein family, member 2 | CCDS1404.1      | chr1_200819006-200819006_G_A  | 1037E>K | Substitution | Nonsynonymous coding | 35% |
| MM04T | CAMSAP2 | calmodulin regulated spectrin-associated protein family, member 2 | CCDS1404.1      | chr1_200819353-200819353_C_A  | 1152F>L | Substitution | Nonsynonymous coding | 38% |
| MM04T | CAMSAP2 | calmodulin regulated spectrin-associated protein family, member 2 | CCDS1404.1      | chr1_200822455-200822455_G_T  | 1219E>X | Substitution | Nonsense             | 28% |
| MM04T | CAMTA1  | calmodulin binding transcription activator 1                      | CCDS30576.1     | chr1_7151400-7151400_G_A      | 91E>K   | Substitution | Nonsynonymous coding | 24% |
| MM04T | CAMTA1  | calmodulin binding transcription activator 1                      | CCDS30576.1     | chr1_7811280-7811280_A_G      | 1571T>A | Substitution | Nonsynonymous coding | 29% |
| MM04T | CAMTA2  | calmodulin binding transcription activator 2                      | CCDS11063.1     | chr17_4872209-4872209_G_A     | 1180R>X | Substitution | Nonsense             | 12% |
| MM04T | CAP2    | CAP, adenylate cyclase-associated protein, 2 (yeast)              | CCDS4539.1      | chr6_17543136-17543136_C_A    | 357F>L  | Substitution | Nonsynonymous coding | 27% |
| MM04T | CAPN12  | calpain 12                                                        | CCDS12519.1     | chr19_39230816-39230816_C_A   | 202E>X  | Substitution | Nonsense             | 11% |
| MM04T | CAPN13  | calpain 13                                                        | CCDS46252.1     | chr2_30961140-30961140_G_T    | 538F>L  | Substitution | Nonsynonymous coding | 28% |
| MM04T | CAPN6   | calpain 6                                                         | CCDS14555.1     | chrX_110496247-110496247__T   | NA      | Insertion    | Frameshift           | 27% |
| MM04T | CAPN7   | calpain 7                                                         | CCDS2624.1      | chr3_15253671-15253671_G_T    | 55E>X   | Substitution | Nonsense             | 28% |
| MM04T | CAPN9   | calpain 9                                                         | CCDS1586.1      | chr1_230916039-230916039_G_A  | 410R>K  | Substitution | Nonsynonymous coding | 34% |
| MM04T | CAPZA2  | capping protein (actin filament) muscle Z-line, alpha 2           | CCDS5768.1      | chr7_116533100-116533100_G_T  | NA      | Substitution | Splice site donor    | 13% |
| MM04T | CARD10  | caspase recruitment domain family, member 10                      | CCDS13948.1     | chr22_37891880-37891880_C_A   | 730E>D  | Substitution | Nonsynonymous coding | 30% |
| MM04T | CARD11  | caspase recruitment domain family, member 11                      | CCDS5336.2      | chr7_2985525-2985525_C_A      | 96E>X   | Substitution | Nonsense             | 33% |
| MM04T | CARD6   | caspase recruitment domain family, member 6                       | CCDS3935.1      | chr5_40853491-40853491_G_T    | 686R>I  | Substitution | Nonsynonymous coding | 33% |
| MM04T | CARS2   | cysteinyI-trNA synthetase 2, mitochondrial (putative)             | CCDS9514.1      | chr13_111296817-111296817_G_A | 444P>L  | Substitution | Nonsynonymous coding | 22% |
| MM04T | CASC5   | cancer susceptibility candidate 5                                 | CCDS42023.1     | chr15_40914129-40914129_C_A   | 582S>Y  | Substitution | Nonsynonymous coding | 21% |
| MM04T | CASK    | calcium/calmodulin-dependent serine protein kinase (MAGUK family) | CCDS14257.1     | chrX_41402003-41402003_G_T    | 699T>N  | Substitution | Nonsynonymous coding | 24% |
| MM04T | CASK    | calcium/calmodulin-dependent serine protein kinase (MAGUK family) | CCDS14257.1     | chrX_41437631-41437631_G_A    | 489R>W  | Substitution | Nonsynonymous coding | 17% |

|       |          |                                                                       |                 |                               |         |              |                      |     |
|-------|----------|-----------------------------------------------------------------------|-----------------|-------------------------------|---------|--------------|----------------------|-----|
| MM04T | CASK     | calcium/calmodulin-dependent serine protein kinase (MAGUK family)     | CCDS14257.1     | chrX_41530756-41530756_C_T    | 153E>K  | Substitution | Nonsynonymous coding | 18% |
| MM04T | CASKIN1  | CASK interacting protein 1                                            | CCDS42103.1     | chr16_2233846-2233846_G_A     | 505R>C  | Substitution | Nonsynonymous coding | 18% |
| MM04T | CASP10   | caspase 10, apoptosis-related cysteine peptidase                      | CCDS2340.1      | chr2_202050731-202050731_C_A  | 77F>L   | Substitution | Nonsynonymous coding | 34% |
| MM04T | CASP10   | caspase 10, apoptosis-related cysteine peptidase                      | CCDS2340.1      | chr2_202052468-202052468_G_T  | 129E>D  | Substitution | Nonsynonymous coding | 27% |
| MM04T | CASP10   | caspase 10, apoptosis-related cysteine peptidase                      | CCDS2340.1      | chr2_202050503-202050503_G_T  | 1M>I    | Substitution | Nonsynonymous coding | 22% |
| MM04T | CASP5    | caspase 5, apoptosis-related cysteine peptidase                       | CCDS44720.1     | chr11_104878041-104878041_T   | NA      | Insertion    | Frameshift           | 25% |
| MM04T | CASP5    | caspase 5, apoptosis-related cysteine peptidase                       | CCDS44720.1     | chr11_104866562-104866562_T_G | 418K>T  | Substitution | Nonsynonymous coding | 34% |
| MM04T | CASP8    | caspase 8, apoptosis-related cysteine peptidase                       | CCDS42798.1     | chr2_202141636-202141636_G_T  | 308E>D  | Substitution | Nonsynonymous coding | 23% |
| MM04T | CASP8AP2 | caspase 8 associated protein 2                                        | NM_001137667    | chr6_90572336-90572336_C_T    | 303S>L  | Substitution | Nonsynonymous coding | 11% |
| MM04T | CASP8AP2 | caspase 8 associated protein 2                                        | NM_001137667    | chr6_90572627-90572627_C_A    | 400S>Y  | Substitution | Nonsynonymous coding | 28% |
| MM04T | CASP8AP2 | caspase 8 associated protein 2                                        | NM_001137667    | chr6_90575695-90575695_C_A    | 896H>N  | Substitution | Nonsynonymous coding | 26% |
| MM04T | CASP8AP2 | caspase 8 associated protein 2                                        | ENST00000455594 | chr6_90581120-90581120_T_A    | 1969F>I | Substitution | Nonsynonymous coding | 34% |
| MM04T | CASQ2    | calsequestrin 2 (cardiac muscle)                                      | CCDS884.1       | chr1_116280861-116280861_C_A  | 172K>N  | Substitution | Nonsynonymous coding | 19% |
| MM04T | CASS4    | Cas scaffolding protein family member 4                               | CCDS33492.1     | chr20_55027640-55027640_G_T   | 470D>Y  | Substitution | Nonsynonymous coding | 25% |
| MM04T | CASZ1    | castor zinc finger 1                                                  | CCDS41246.1     | chr1_10713503-10713503_C_T    | 871G>S  | Substitution | Nonsynonymous coding | 29% |
| MM04T | CATSPER1 | cation channel, sperm associated 1                                    | CCDS8127.1      | chr11_65789259-65789259_G_T   | 507F>L  | Substitution | Nonsynonymous coding | 35% |
| MM04T | CATSPERB | catsper channel auxiliary subunit beta                                | CCDS32142.1     | chr14_92126306-92126306_C_T   | 436G>D  | Substitution | Nonsynonymous coding | 37% |
| MM04T | CATSPERG | catsper channel auxiliary subunit gamma                               | CCDS12514.2     | chr19_38834650-38834650_G_T   | 163E>X  | Substitution | Nonsense             | 26% |
| MM04T | CBFA2T2  | core-binding factor, runt domain, alpha subunit 2; translocated to, 2 | CCDS13221.1     | chr20_32212766-32212766_C_T   | 306R>W  | Substitution | Nonsynonymous coding | 35% |
| MM04T | CBL      | Cbl proto-oncogene, E3 ubiquitin protein ligase                       | CCDS8418.1      | chr11_119156172-119156172_G_T | 613E>X  | Substitution | Nonsense             | 29% |
| MM04T | CBLC     | Cbl proto-oncogene, E3 ubiquitin protein ligase C                     | CCDS12643.1     | chr19_45296777-45296777_G_A   | 395G>D  | Substitution | Nonsynonymous coding | 27% |
| MM04T | CBR1     | carbonyl reductase 1                                                  | ENST00000399191 | chr21_37444575-37444575_C_A   | 167F>L  | Substitution | Nonsynonymous coding | 25% |
| MM04T | CBR4     | carbonyl reductase 4                                                  | CCDS3812.1      | chr4_169928837-169928837_C_A  | 71E>D   | Substitution | Nonsynonymous coding | 18% |
| MM04T | CBS      | cystathionine-beta-synthase                                           | CCDS13693.1     | chr21_44476940-44476940_C_T   | 509A>T  | Substitution | Nonsynonymous coding | 15% |
| MM04T | CCAR1    | cell division cycle and apoptosis regulator 1                         | CCDS7282.1      | chr10_70507010-70507010_G_T   | 204R>I  | Substitution | Nonsynonymous coding | 26% |
| MM04T | CCDC102A | coiled-coil domain containing 102A                                    | CCDS10784.1     | chr16_57552127-57552127_C_A   | 367E>D  | Substitution | Nonsynonymous coding | 21% |
| MM04T | CCDC102B | coiled-coil domain containing 102B                                    | CCDS11996.2     | chr18_66504238-66504238_G_A   | 80E>K   | Substitution | Nonsynonymous coding | 25% |
| MM04T | CCDC106  | coiled-coil domain containing 106                                     | CCDS33118.1     | chr19_56163833-56163833_G_T   | 188K>N  | Substitution | Nonsynonymous coding | 22% |
| MM04T | CCDC108  | coiled-coil domain containing 108                                     | CCDS2430.2      | chr2_219870245-219870245_C_A  | 1654E>D | Substitution | Nonsynonymous coding | 29% |
| MM04T | CCDC108  | coiled-coil domain containing 108                                     | CCDS2430.2      | chr2_219888108-219888108_C_A  | 881D>Y  | Substitution | Nonsynonymous coding | 28% |
| MM04T | CCDC110  | coiled-coil domain containing 110                                     | CCDS3843.1      | chr4_186379974-186379974_C_A  | 589E>D  | Substitution | Nonsynonymous coding | 38% |
| MM04T | CCDC111  | coiled-coil domain containing 111                                     | CCDS3837.1      | chr4_185599400-185599400_A_C  | 287N>H  | Substitution | Nonsynonymous coding | 28% |



|       |         |                                   |                 |                               |         |              |                      |     |
|-------|---------|-----------------------------------|-----------------|-------------------------------|---------|--------------|----------------------|-----|
| MM04T | CCDC112 | coiled-coil domain containing 112 | CCDS34213.1     | chr5_114605499-114605499_A_   | NA      | Deletion     | Splice site acceptor | 12% |
| MM04T | CCDC126 | coiled-coil domain containing 126 | CCDS5384.1      | chr7_23650970-23650970_G_T    | 12Q>H   | Substitution | Nonsynonymous coding | 34% |
| MM04T | CCDC129 | coiled-coil domain containing 129 | CCDS5435.2      | chr7_31617561-31617561_G_A    | 228R>K  | Substitution | Nonsynonymous coding | 23% |
| MM04T | CCDC13  | coiled-coil domain containing 13  | CCDS2705.1      | chr3_42788795-42788795_C_T    | 225R>Q  | Substitution | Nonsynonymous coding | 34% |
| MM04T | CCDC13  | coiled-coil domain containing 13  | CCDS2705.1      | chr3_42799764-42799764_C_A    | 25R>L   | Substitution | Nonsynonymous coding | 16% |
| MM04T | CCDC134 | coiled-coil domain containing 134 | CCDS33654.1     | chr22_42204993-42204993_G_T   | 33E>D   | Substitution | Nonsynonymous coding | 57% |
| MM04T | CCDC136 | coiled-coil domain containing 136 | CCDS47704.1     | chr7_128434614-128434614_G_T  | 77E>X   | Substitution | Nonsense             | 20% |
| MM04T | CCDC141 | coiled-coil domain containing 141 | ENST00000409284 | chr2_179749674-179749674_G_A  | 558S>L  | Substitution | Nonsynonymous coding | 14% |
| MM04T | CCDC141 | coiled-coil domain containing 141 | ENST00000409284 | chr2_179751599-179751599_C_T  | NA      | Substitution | Splice site acceptor | 26% |
| MM04T | CCDC146 | coiled-coil domain containing 146 | CCDS34671.1     | chr7_76889339-76889339_A_     | NA      | Insertion    | Frameshift           | 18% |
| MM04T | CCDC147 | coiled-coil domain containing 147 | CCDS31282.1     | chr10_106118151-106118151_G_T | 21R>I   | Substitution | Nonsynonymous coding | 24% |
| MM04T | CCDC147 | coiled-coil domain containing 147 | CCDS31282.1     | chr10_106130713-106130713_G_T | 331E>X  | Substitution | Nonsense             | 22% |
| MM04T | CCDC147 | coiled-coil domain containing 147 | CCDS31282.1     | chr10_106163512-106163512_G_T | 689E>X  | Substitution | Nonsense             | 22% |
| MM04T | CCDC150 | coiled-coil domain containing 150 | CCDS46478.1     | chr2_197584347-197584347_C_T  | 708L>F  | Substitution | Nonsynonymous coding | 24% |
| MM04T | CCDC158 | coiled-coil domain containing 158 | CCDS43242.1     | chr4_77244550-77244550_G_A    | 1057P>L | Substitution | Nonsynonymous coding | 30% |
| MM04T | CCDC160 | coiled-coil domain containing 160 | CCDS48171.1     | chrX_133378998-133378998_G_T  | 56Q>H   | Substitution | Nonsynonymous coding | 13% |
| MM04T | CCDC164 | coiled-coil domain containing 164 | CCDS1723.1      | chr2_26624860-26624860_G_T    | 1M>I    | Substitution | Nonsynonymous coding | 34% |
| MM04T | CCDC168 | coiled-coil domain containing 168 | NM_001146197    | chr13_103383129-103383129_C_A | 6640V>L | Substitution | Nonsynonymous coding | 28% |
| MM04T | CCDC170 | coiled-coil domain containing 170 | CCDS43515.1     | chr6_151859300-151859300_G_T  | 103D>Y  | Substitution | Nonsynonymous coding | 37% |
| MM04T | CCDC173 | coiled-coil domain containing 173 | CCDS46445.1     | chr2_170502397-170502397_T_A  | 538K>I  | Substitution | Nonsynonymous coding | 38% |
| MM04T | CCDC173 | coiled-coil domain containing 173 | CCDS46445.1     | chr2_170505728-170505728_T_G  | 427E>D  | Substitution | Nonsynonymous coding | 12% |
| MM04T | CCDC175 | coiled-coil domain containing 175 | NM_001164399    | chr14_59988313-59988313_G_A   | 693R>W  | Substitution | Nonsynonymous coding | 32% |
| MM04T | CCDC23  | coiled-coil domain containing 23  | CCDS474.1       | chr1_43282209-43282209_G_T    | 3P>T    | Substitution | Nonsynonymous coding | 16% |
| MM04T | CCDC33  | coiled-coil domain containing 33  | CCDS42058.1     | chr15_74623090-74623090_C_T   | 515R>X  | Substitution | Nonsense             | 36% |
| MM04T | CCDC38  | coiled-coil domain containing 38  | CCDS9056.1      | chr12_96330256-96330256_G_T   | 11S>Y   | Substitution | Nonsynonymous coding | 28% |
| MM04T | CCDC38  | coiled-coil domain containing 38  | CCDS9056.1      | chr12_96284705-96284705_A_C   | 259L>X  | Substitution | Nonsense             | 23% |
| MM04T | CCDC40  | coiled-coil domain containing 40  | CCDS42395.1     | chr17_78071198-78071198_G_A   | 1059R>Q | Substitution | Nonsynonymous coding | 24% |
| MM04T | CCDC41  | coiled-coil domain containing 41  | CCDS41820.1     | chr12_94769687-94769687_C_T   | 303R>Q  | Substitution | Nonsynonymous coding | 48% |
| MM04T | CCDC42B | coiled-coil domain containing 42B | CCDS44983.1     | chr12_113593120-113593120_G_A | 249G>E  | Substitution | Nonsynonymous coding | 20% |
| MM04T | CCDC54  | coiled-coil domain containing 54  | CCDS2949.1      | chr3_107096927-107096927_G_T  | 165E>X  | Substitution | Nonsense             | 22% |
| MM04T | CCDC59  | coiled-coil domain containing 59  | CCDS9023.1      | chr12_82748355-82748355_C_A   | 161K>N  | Substitution | Nonsynonymous coding | 38% |
| MM04T | CCDC59  | coiled-coil domain containing 59  | CCDS9023.1      | chr12_82750999-82750999_C_A   | 68K>N   | Substitution | Nonsynonymous coding | 39% |

|       |            |                                                 |                 |                               |         |              |                      |     |
|-------|------------|-------------------------------------------------|-----------------|-------------------------------|---------|--------------|----------------------|-----|
| MM04T | CCDC60     | coiled-coil domain containing 60                | CCDS9190.1      | chr12_119937913-119937913_A_C | 196K>N  | Substitution | Nonsynonymous coding | 24% |
| MM04T | CCDC63     | coiled-coil domain containing 63                | CCDS9151.1      | chr12_111296402-111296402_G_T | 64K>N   | Substitution | Nonsynonymous coding | 34% |
| MM04T | CCDC65     | coiled-coil domain containing 65                | CCDS8772.1      | chr12_49298822-49298822_G_T   | 76E>X   | Substitution | Nonsense             | 18% |
| MM04T | CCDC68     | coiled-coil domain containing 68                | CCDS11959.1     | chr18_52586519-52586519_G_A   | 258R>C  | Substitution | Nonsynonymous coding | 31% |
| MM04T | CCDC68     | coiled-coil domain containing 68                | CCDS11959.1     | chr18_52608292-52608292_A_C   | 47I>S   | Substitution | Nonsynonymous coding | 29% |
| MM04T | CCDC70     | coiled-coil domain containing 70                | CCDS9431.1      | chr13_52439671-52439671_G_A   | 53E>K   | Substitution | Nonsynonymous coding | 30% |
| MM04T | CCDC73     | coiled-coil domain containing 73                | CCDS41630.1     | chr11_32663620-32663620_T_G   | 316E>D  | Substitution | Nonsynonymous coding | 31% |
| MM04T | CCDC77     | coiled-coil domain containing 77                | CCDS8503.1      | chr12_550121-550121_C_A       | 427L>I  | Substitution | Nonsynonymous coding | 30% |
| MM04T | CCDC78     | coiled-coil domain containing 78                | CCDS32353.1     | chr16_776075-776075_C_T       | 24R>Q   | Substitution | Nonsynonymous coding | 31% |
| MM04T | CCDC80     | coiled-coil domain containing 80                | CCDS2968.1      | chr3_112337838-112337838_T_C  | 717T>A  | Substitution | Nonsynonymous coding | 29% |
| MM04T | CCDC80     | coiled-coil domain containing 80                | ENST00000447230 | chr3_112358764-112358764_C_T  | 8V>M    | Substitution | Nonsynonymous coding | 22% |
| MM04T | CCDC83     | coiled-coil domain containing 83                | CCDS8271.1      | chr11_85630543-85630543_C_A   | 442S>Y  | Substitution | Nonsynonymous coding | 44% |
| MM04T | CCDC85A    | coiled-coil domain containing 85A               | CCDS46290.1     | chr2_56420355-56420355_G_T    | 340Q>H  | Substitution | Nonsynonymous coding | 30% |
| MM04T | CCDC88A    | coiled-coil domain containing 88A               | ENST00000426576 | chr2_55522567-55522567_G_A    | 1081A>V | Substitution | Nonsynonymous coding | 33% |
| MM04T | CCDC88A    | coiled-coil domain containing 88A               | CCDS46288.1     | chr2_55539636-55539636_T_C    | 1337N>S | Substitution | Nonsynonymous coding | 31% |
| MM04T | CCDS6751.1 | -                                               | CCDS6751.1      | chr9_104071628-104071628_A_G  | 174Q>R  | Substitution | Nonsynonymous coding | 31% |
| MM04T | CCDS6751.1 | -                                               | CCDS6751.1      | chr9_104048470-104048470_G_T  | 113E>X  | Substitution | Nonsense             | 14% |
| MM04T | CCDS757.1  | -                                               | CCDS757.1       | chr1_99772517-99772517_G_T    | 748R>I  | Substitution | Nonsynonymous coding | 31% |
| MM04T | CCL11      | chemokine (C-C motif) ligand 11                 | CCDS11279.1     | chr17_32614646-32614646_G_T   | 77K>N   | Substitution | Nonsynonymous coding | 46% |
| MM04T | CCL21      | chemokine (C-C motif) ligand 21                 | CCDS6571.1      | chr9_34709676-34709676_G_T    | 64F>L   | Substitution | Nonsynonymous coding | 37% |
| MM04T | CCNA1      | cyclin A1                                       | CCDS9357.1      | chr13_37012807-37012807_C_A   | 232Y>X  | Substitution | Nonsense             | 26% |
| MM04T | CCNB1      | cyclin B1                                       | CCDS3997.1      | chr5_68467184-68467184_C_A    | 151L>I  | Substitution | Nonsynonymous coding | 28% |
| MM04T | CCNB3      | cyclin B3                                       | CCDS14331.1     | chrX_50054102-50054102_C_A    | 978S>Y  | Substitution | Nonsynonymous coding | 22% |
| MM04T | CCNT1      | cyclin T1                                       | CCDS8766.1      | chr12_49093563-49093563_C_T   | 165R>Q  | Substitution | Nonsynonymous coding | 18% |
| MM04T | CCNYL2     | cyclin Y-like 2                                 | ENST00000426433 | chr10_42907224-42907224_G_T   | 300L>I  | Substitution | Nonsynonymous coding | 30% |
| MM04T | CCNYL2     | cyclin Y-like 2                                 | ENST00000426433 | chr10_42920835-42920835_C_A   | 192L>F  | Substitution | Nonsynonymous coding | 33% |
| MM04T | CCPG1      | cell cycle progression 1                        | CCDS42039.1     | chr15_55669255-55669255_C_A   | 116E>X  | Substitution | Nonsense             | 30% |
| MM04T | CCR9       | chemokine (C-C motif) receptor 9                | CCDS2732.1      | chr3_45942383-45942383_G_T    | 35D>Y   | Substitution | Nonsynonymous coding | 30% |
| MM04T | CCT4       | chaperonin containing TCP1, subunit 4 (delta)   | CCDS33206.1     | chr2_62106045-62106045_C_A    | 161E>X  | Substitution | Nonsense             | 21% |
| MM04T | CCT6B      | chaperonin containing TCP1, subunit 6B (zeta 2) | CCDS32617.1     | chr17_33255092-33255092_C_T   | 523R>Q  | Substitution | Nonsynonymous coding | 27% |
| MM04T | CCT6B      | chaperonin containing TCP1, subunit 6B (zeta 2) | CCDS32617.1     | chr17_33256026-33256026_C_T   | 493G>E  | Substitution | Nonsynonymous coding | 27% |
| MM04T | CCT7       | chaperonin containing TCP1, subunit 7 (eta)     | CCDS46336.1     | chr2_73478366-73478366_G_A    | 406V>M  | Substitution | Nonsynonymous coding | 44% |

|       |          |                                                 |                 |                              |         |              |                      |     |
|-------|----------|-------------------------------------------------|-----------------|------------------------------|---------|--------------|----------------------|-----|
| MM04T | CD14     | CD14 molecule                                   | CCDS4232.1      | chr5_140011496-140011496_G_A | 358S>L  | Substitution | Nonsynonymous coding | 30% |
| MM04T | CD19     | CD19 molecule                                   | CCDS10644.1     | chr16_28950050-28950050_C_T  | 514R>C  | Substitution | Nonsynonymous coding | 33% |
| MM04T | CD1E     | CD1e molecule                                   | CCDS41417.1     | chr1_158325323-158325323_C_A | 197L>I  | Substitution | Nonsynonymous coding | 25% |
| MM04T | CD1E     | CD1e molecule                                   | CCDS41417.1     | chr1_158326593-158326593_G_T | 358K>N  | Substitution | Nonsynonymous coding | 41% |
| MM04T | CD200R1  | CD200 receptor 1                                | CCDS2969.1      | chr3_112648079-112648079_G_A | 160P>S  | Substitution | Nonsynonymous coding | 15% |
| MM04T | CD207    | CD207 molecule, langerin                        | NM_015717       | chr2_71060874-71060874_C_A   | 156E>D  | Substitution | Nonsynonymous coding | 22% |
| MM04T | CD209    | CD209 molecule                                  | CCDS12186.1     | chr19_7809892-7809892_C_T    | 279D>N  | Substitution | Nonsynonymous coding | 31% |
| MM04T | CD22     | CD22 molecule                                   | CCDS12457.1     | chr19_35832370-35832370_G_T  | 544E>D  | Substitution | Nonsynonymous coding | 22% |
| MM04T | CD22     | CD22 molecule                                   | CCDS12457.1     | chr19_35836617-35836617_G_A  | 774R>Q  | Substitution | Nonsynonymous coding | 27% |
| MM04T | CD36     | CD36 molecule (thrombospondin receptor)         | CCDS34673.1     | chr7_80302097-80302097_C_A   | 379F>L  | Substitution | Nonsynonymous coding | 31% |
| MM04T | CD4      | CD4 molecule                                    | CCDS8562.1      | chr12_6924121-6924121_G_T    | 190Q>H  | Substitution | Nonsynonymous coding | 22% |
| MM04T | CD40LG   | CD40 ligand                                     | CCDS14659.1     | chrX_135736565-135736565_G_T | 108E>X  | Substitution | Nonsense             | 15% |
| MM04T | CD48     | CD48 molecule                                   | CCDS1208.1      | chr1_160651069-160651069_C_A | 192R>M  | Substitution | Nonsynonymous coding | 17% |
| MM04T | CD53     | CD53 molecule                                   | CCDS829.1       | chr1_111435078-111435078_G_A | 59V>M   | Substitution | Nonsynonymous coding | 23% |
| MM04T | CD79A    | CD79a molecule, immunoglobulin-associated alpha | CCDS12589.1     | chr19_42383220-42383220_C_A  | 80F>L   | Substitution | Nonsynonymous coding | 20% |
| MM04T | CD82     | CD82 molecule                                   | CCDS7909.1      | chr11_44616262-44616262_A_G  | 17N>S   | Substitution | Nonsynonymous coding | 23% |
| MM04T | CD86     | CD86 molecule                                   | CCDS3009.1      | chr3_121822581-121822581_G_T | 96R>I   | Substitution | Nonsynonymous coding | 29% |
| MM04T | CD96     | CD96 molecule                                   | CCDS2959.1      | chr3_111366453-111366453_T_G | 530F>C  | Substitution | Nonsynonymous coding | 25% |
| MM04T | CD99L2   | CD99 molecule-like 2                            | CCDS35427.1     | chrX_149984543-149984543_C_T | 47D>N   | Substitution | Nonsynonymous coding | 33% |
| MM04T | CDA      | cytidine deaminase                              | CCDS210.1       | chr1_20940377-20940377_G_T   | 103R>S  | Substitution | Nonsynonymous coding | 14% |
| MM04T | CDADC1   | cytidine and dCMP deaminase domain containing 1 | CCDS9415.1      | chr13_49841638-49841638_G_A  | 148R>Q  | Substitution | Nonsynonymous coding | 18% |
| MM04T | CDADC1   | cytidine and dCMP deaminase domain containing 1 | CCDS9415.1      | chr13_49860388-49860388_C_A  | 481L>I  | Substitution | Nonsynonymous coding | 26% |
| MM04T | CDADC1   | cytidine and dCMP deaminase domain containing 1 | CCDS9415.1      | chr13_49842189-49842189_C_T  | 332R>X  | Substitution | Nonsense             | 25% |
| MM04T | CDC14A   | cell division cycle 14A                         | ENST00000455467 | chr1_100817348-100817348_A_C | 12Q>H   | Substitution | Nonsynonymous coding | 20% |
| MM04T | CDC14A   | cell division cycle 14A                         | CCDS770.1       | chr1_100963699-100963699_T_A | 453S>T  | Substitution | Nonsynonymous coding | 18% |
| MM04T | CDC23    | cell division cycle 23                          | CCDS4200.2      | chr5_137536912-137536912_G_A | 180R>X  | Substitution | Nonsense             | 34% |
| MM04T | CDC26    | cell division cycle 26                          | CCDS6790.1      | chr9_116034720-116034720_C_T | 23R>Q   | Substitution | Nonsynonymous coding | 32% |
| MM04T | CDC27    | cell division cycle 27                          | CCDS45720.1     | chr17_45199819-45199819_C_A  | 801E>X  | Substitution | Nonsense             | 19% |
| MM04T | CDC37L1  | cell division cycle 37-like 1                   | CCDS6454.1      | chr9_4697870-4697870_G_T     | 246Q>H  | Substitution | Nonsynonymous coding | 33% |
| MM04T | CDC42BPA | CDC42 binding protein kinase alpha (DMPK-like)  | ENST00000334218 | chr1_227198659-227198659_G_T | 1620L>I | Substitution | Nonsynonymous coding | 22% |
| MM04T | CDC42BPG | CDC42 binding protein kinase gamma (DMPK-like)  | CCDS31601.1     | chr11_64604401-64604401_C_A  | 432K>N  | Substitution | Nonsynonymous coding | 24% |
| MM04T | CDC42EP4 | CDC42 effector protein (Rho GTPase binding) 4   | CCDS11695.1     | chr17_71282205-71282205_C_A  | 145K>N  | Substitution | Nonsynonymous coding | 27% |

|       |          |                                                      |                 |                              |         |              |                      |     |
|-------|----------|------------------------------------------------------|-----------------|------------------------------|---------|--------------|----------------------|-----|
| MM04T | CDC5L    | cell division cycle 5-like                           | CCDS4912.1      | chr6_44376338-44376338_G_A   | 354R>Q  | Substitution | Nonsynonymous coding | 35% |
| MM04T | CDC5L    | cell division cycle 5-like                           | CCDS4912.1      | chr6_44413496-44413496_G_T   | 732M>I  | Substitution | Nonsynonymous coding | 24% |
| MM04T | CDC73    | cell division cycle 73                               | CCDS1382.1      | chr1_193104712-193104712_G_A | 139R>Q  | Substitution | Nonsynonymous coding | 21% |
| MM04T | CDC73    | cell division cycle 73                               | CCDS1382.1      | chr1_193119509-193119509_G_T | 302E>X  | Substitution | Nonsense             | 19% |
| MM04T | CDCA2    | cell division cycle associated 2                     | CCDS6049.1      | chr8_25343279-25343279_A_G   | 457N>S  | Substitution | Nonsynonymous coding | 36% |
| MM04T | CDCA7    | cell division cycle associated 7                     | CCDS2252.1      | chr2_174228154-174228154_G_T | 195E>D  | Substitution | Nonsynonymous coding | 27% |
| MM04T | CDH1     | cadherin 1, type 1, E-cadherin (epithelial)          | CCDS10869.1     | chr16_68855995-68855995_C_A  | 601F>L  | Substitution | Nonsynonymous coding | 22% |
| MM04T | CDH1     | cadherin 1, type 1, E-cadherin (epithelial)          | CCDS10869.1     | chr16_68857443-68857443_G_A  | 693G>D  | Substitution | Nonsynonymous coding | 30% |
| MM04T | CDH1     | cadherin 1, type 1, E-cadherin (epithelial)          | CCDS10869.1     | chr16_68857307-68857307_G_T  | 648E>X  | Substitution | Nonsense             | 27% |
| MM04T | CDH10    | cadherin 10, type 2 (T2-cadherin)                    | CCDS3892.1      | chr5_24511603-24511603_G_T   | 279L>I  | Substitution | Nonsynonymous coding | 40% |
| MM04T | CDH12    | cadherin 12, type 2 (N-cadherin 2)                   | CCDS3890.1      | chr5_21755927-21755927_C_T   | 553R>Q  | Substitution | Nonsynonymous coding | 37% |
| MM04T | CDH18    | cadherin 18, type 2                                  | CCDS3889.1      | chr5_19612701-19612701_C_A   | 218R>I  | Substitution | Nonsynonymous coding | 27% |
| MM04T | CDH19    | cadherin 19, type 2                                  | CCDS11994.1     | chr18_64172492-64172492_G_T  | 626L>I  | Substitution | Nonsynonymous coding | 39% |
| MM04T | CDH19    | cadherin 19, type 2                                  | CCDS11994.1     | chr18_64218463-64218463_C_A  | 215E>X  | Substitution | Nonsense             | 26% |
| MM04T | CDH2     | cadherin 2, type 1, N-cadherin (neuronal)            | CCDS11891.1     | chr18_25572735-25572735_G_T  | 410Q>K  | Substitution | Nonsynonymous coding | 18% |
| MM04T | CDH23    | cadherin-related 23                                  | NM_022124       | chr10_73565657-73565657_C_A  | 2656A>E | Substitution | Nonsynonymous coding | 22% |
| MM04T | CDH26    | cadherin 26                                          | CCDS13485.1     | chr20_58563977-58563977_C_T  | 348R>C  | Substitution | Nonsynonymous coding | 34% |
| MM04T | CDH26    | cadherin 26                                          | CCDS13485.1     | chr20_58571721-58571721_C_A  | 642L>I  | Substitution | Nonsynonymous coding | 20% |
| MM04T | CDH6     | cadherin 6, type 2, K-cadherin (fetal kidney)        | CCDS3894.1      | chr5_31267764-31267764_C_A   | 62L>I   | Substitution | Nonsynonymous coding | 34% |
| MM04T | CDH9     | cadherin 9, type 2 (T1-cadherin)                     | CCDS3893.1      | chr5_26915896-26915896_G_T   | 122S>Y  | Substitution | Nonsynonymous coding | 44% |
| MM04T | CDHR3    | cadherin-related family member 3                     | CCDS47684.1     | chr7_105635231-105635231_T_G | 183M>R  | Substitution | Nonsynonymous coding | 29% |
| MM04T | CDK1     | cyclin-dependent kinase 1                            | CCDS44408.1     | chr10_62551966-62551966_G_T  | 238K>N  | Substitution | Nonsynonymous coding | 25% |
| MM04T | CDK11A   | cyclin-dependent kinase 11A                          | ENST00000340677 | chr1_1588868-1588868_C_A     | 23R>M   | Substitution | Nonsynonymous coding | 33% |
| MM04T | CDK11A   | cyclin-dependent kinase 11A                          | CCDS44042.1     | chr1_1635294-1635294_G_A     | 627S>L  | Substitution | Nonsynonymous coding | 21% |
| MM04T | CDK18    | cyclin-dependent kinase 18                           | CCDS1454.1      | chr1_205492385-205492385_C_A | 30F>L   | Substitution | Nonsynonymous coding | 19% |
| MM04T | CDK18    | cyclin-dependent kinase 18                           | CCDS1454.1      | chr1_205492772-205492772_C_A | 98L>M   | Substitution | Nonsynonymous coding | 14% |
| MM04T | CDK20    | cyclin-dependent kinase 20                           | ENST00000286878 | chr9_90582206-90582206_G_A   | 383P>S  | Substitution | Nonsynonymous coding | 32% |
| MM04T | CDK5RAP2 | CDK5 regulatory subunit associated protein 2         | CCDS6823.1      | chr9_123290180-123290180_C_A | 301E>D  | Substitution | Nonsynonymous coding | 24% |
| MM04T | CDK5RAP2 | CDK5 regulatory subunit associated protein 2         | ENST00000345313 | chr9_123298902-123298902_C_A | NA      | Substitution | Splice site acceptor | 36% |
| MM04T | CDK8     | cyclin-dependent kinase 8                            | CCDS9317.1      | chr13_26911734-26911734_A_C  | 53Q>H   | Substitution | Nonsynonymous coding | 32% |
| MM04T | CDKL1    | cyclin-dependent kinase-like 1 (CDC2-related kinase) | ENST00000356146 | chr14_50802735-50802735_C_A  | 986E>D  | Substitution | Nonsynonymous coding | 25% |
| MM04T | CDKL2    | cyclin-dependent kinase-like 2 (CDC2-related kinase) | CCDS3570.1      | chr4_76507101-76507101_C_A   | 475G>V  | Substitution | Nonsynonymous coding | 27% |

|       |          |                                                                               |             |                              |         |              |                      |     |
|-------|----------|-------------------------------------------------------------------------------|-------------|------------------------------|---------|--------------|----------------------|-----|
| MM04T | CDKL2    | cyclin-dependent kinase-like 2 (CDC2-related kinase)                          | CCDS3570.1  | chr4_76551055-76551055_C_T   | 40D>N   | Substitution | Nonsynonymous coding | 37% |
| MM04T | CDKL3    | cyclin-dependent kinase-like 3                                                | CCDS47264.1 | chr5_133644369-133644369_A_C | 311S>A  | Substitution | Nonsynonymous coding | 32% |
| MM04T | CDKL5    | cyclin-dependent kinase-like 5                                                | CCDS14186.1 | chrX_18613531-18613531_C_A   | 270L>I  | Substitution | Nonsynonymous coding | 35% |
| MM04T | CDS2     | CDP-diacylglycerol synthase (phosphatidate cytidyltransferase) 2              | CCDS13088.1 | chr20_5159565-5159565_A_C    | 164K>N  | Substitution | Nonsynonymous coding | 24% |
| MM04T | CDT1     | chromatin licensing and DNA replication factor 1                              | CCDS32510.1 | chr16_88873767-88873767_G_T  | 452E>X  | Substitution | Nonsense             | 21% |
| MM04T | CDYL     | chromodomain protein, Y-like                                                  | CCDS4491.2  | chr6_4892414-4892414_G_T     | 164E>D  | Substitution | Nonsynonymous coding | 30% |
| MM04T | CEACAM18 | carcinoembryonic antigen-related cell adhesion molecule 18                    | CCDS46159.1 | chr19_51984899-51984899_G_A  | 279R>H  | Substitution | Nonsynonymous coding | 33% |
| MM04T | CEACAM21 | carcinoembryonic antigen-related cell adhesion molecule 21                    | CCDS46086.1 | chr19_42083873-42083873_C_A  | 129S>Y  | Substitution | Nonsynonymous coding | 21% |
| MM04T | CEACAM8  | carcinoembryonic antigen-related cell adhesion molecule 8                     | CCDS12610.1 | chr19_43087486-43087486_G_A  | 321A>V  | Substitution | Nonsynonymous coding | 35% |
| MM04T | CEBPA    | CCAAT/enhancer binding protein (C/EBP), alpha                                 | NM_004364   | chr19_33792343-33792343_C_A  | 326K>N  | Substitution | Nonsynonymous coding | 20% |
| MM04T | CEBPZ    | CCAAT/enhancer binding protein (C/EBP), zeta                                  | CCDS1787.1  | chr2_37456067-37456067_T_G   | 90N>T   | Substitution | Nonsynonymous coding | 41% |
| MM04T | CELF3    | CUGBP, Elav-like family member 3                                              | CCDS1002.1  | chr1_151680125-151680125_C_T | NA      | Substitution | Splice site acceptor | 18% |
| MM04T | CELSR2   | cadherin, EGF LAG seven-pass G-type receptor 2 (flamingo homolog, Drosophila) | CCDS796.1   | chr1_109793750-109793750_G_A | 350R>Q  | Substitution | Nonsynonymous coding | 33% |
| MM04T | CELSR2   | cadherin, EGF LAG seven-pass G-type receptor 2 (flamingo homolog, Drosophila) | CCDS796.1   | chr1_109795811-109795811_G_A | 1037R>H | Substitution | Nonsynonymous coding | 35% |
| MM04T | CELSR3   | cadherin, EGF LAG seven-pass G-type receptor 3 (flamingo homolog, Drosophila) | CCDS2775.1  | chr3_48697393-48697393_C_T   | 892R>H  | Substitution | Nonsynonymous coding | 30% |
| MM04T | CELSR3   | cadherin, EGF LAG seven-pass G-type receptor 3 (flamingo homolog, Drosophila) | CCDS2775.1  | chr3_48697667-48697667_G_A   | 801R>C  | Substitution | Nonsynonymous coding | 21% |
| MM04T | CENPB    | centromere protein B, 80kDa                                                   | CCDS13064.1 | chr20_3766895-3766895_C_T    | 79G>D   | Substitution | Nonsynonymous coding | 25% |
| MM04T | CENPC1   | centromere protein C 1                                                        | CCDS47063.1 | chr4_68357973-68357973_G_T   | 814L>I  | Substitution | Nonsynonymous coding | 31% |
| MM04T | CENPC1   | centromere protein C 1                                                        | CCDS47063.1 | chr4_68378261-68378261_C_A   | 491D>Y  | Substitution | Nonsynonymous coding | 41% |
| MM04T | CENPF    | centromere protein F, 350/400kDa                                              | CCDS31023.1 | chr1_214815908-214815908_G_T | 1409E>D | Substitution | Nonsynonymous coding | 33% |
| MM04T | CENPF    | centromere protein F, 350/400kDa                                              | CCDS31023.1 | chr1_214818809-214818809_G_T | 1966E>X | Substitution | Nonsense             | 33% |
| MM04T | CENPI    | centromere protein I                                                          | CCDS14479.1 | chrX_100364957-100364957_C_A | 187F>L  | Substitution | Nonsynonymous coding | 35% |
| MM04T | CEP120   | centrosomal protein 120kDa                                                    | CCDS4134.2  | chr5_122720648-122720648_T_C | 587Q>R  | Substitution | Nonsynonymous coding | 34% |
| MM04T | CEP128   | centrosomal protein 128kDa                                                    | CCDS32130.1 | chr14_80993262-80993262_G_T  | 1008S>Y | Substitution | Nonsynonymous coding | 34% |
| MM04T | CEP128   | centrosomal protein 128kDa                                                    | CCDS32130.1 | chr14_81297518-81297518_T_C  | 393K>R  | Substitution | Nonsynonymous coding | 39% |
| MM04T | CEP128   | centrosomal protein 128kDa                                                    | CCDS32130.1 | chr14_81380701-81380701_C_A  | 67E>X   | Substitution | Nonsense             | 15% |
| MM04T | CEP135   | centrosomal protein 135kDa                                                    | CCDS33986.1 | chr4_56847509-56847509_T_G   | 581I>M  | Substitution | Nonsynonymous coding | 46% |
| MM04T | CEP135   | centrosomal protein 135kDa                                                    | CCDS33986.1 | chr4_56878105-56878105_G_T   | 919R>I  | Substitution | Nonsynonymous coding | 17% |
| MM04T | CEP135   | centrosomal protein 135kDa                                                    | CCDS33986.1 | chr4_56831933-56831933_G_T   | 318E>X  | Substitution | Nonsense             | 36% |
| MM04T | CEP135   | centrosomal protein 135kDa                                                    | CCDS33986.1 | chr4_56846345-56846345_G_T   | 504E>X  | Substitution | Nonsense             | 24% |
| MM04T | CEP152   | centrosomal protein 152kDa                                                    | CCDS42033.1 | chr15_49089712-49089712_C_A  | 109R>I  | Substitution | Nonsynonymous coding | 35% |
| MM04T | CEP164   | centrosomal protein 164kDa                                                    | CCDS31683.1 | chr11_11722543-11722543_G_A  | 78A>T   | Substitution | Nonsynonymous coding | 24% |

|       |          |                                                                                                                                                                                 |                 |                               |         |              |                      |     |
|-------|----------|---------------------------------------------------------------------------------------------------------------------------------------------------------------------------------|-----------------|-------------------------------|---------|--------------|----------------------|-----|
| MM04T | CEP164   | centrosomal protein 164kDa                                                                                                                                                      | CCDS31683.1     | chr11_117263825-117263825_G_A | 867E>K  | Substitution | Nonsynonymous coding | 37% |
| MM04T | CEP170P1 | centrosomal protein 170kDa pseudogene 1                                                                                                                                         | ENST00000412784 | chr4_119461525-119461525_G_T  | 113R>I  | Substitution | Nonsynonymous coding | 27% |
| MM04T | CEP19    | centrosomal protein 19kDa                                                                                                                                                       | CCDS43193.2     | chr3_196435420-196435420_G_A  | 41R>X   | Substitution | Nonsense             | 29% |
| MM04T | CEP350   | centrosomal protein 350kDa                                                                                                                                                      | CCDS1336.1      | chr1_179966044-179966044_C_T  | 251A>V  | Substitution | Nonsynonymous coding | 31% |
| MM04T | CEP350   | centrosomal protein 350kDa                                                                                                                                                      | CCDS1336.1      | chr1_180010297-180010297_G_T  | 1379D>Y | Substitution | Nonsynonymous coding | 30% |
| MM04T | CER1     | cerberus 1, cysteine knot superfamily, homolog (Xenopus laevis)                                                                                                                 | CCDS6476.1      | chr9_14722585-14722585_G_A    | 29S>F   | Substitution | Nonsynonymous coding | 35% |
| MM04T | CERS2    | ceramide synthase 2                                                                                                                                                             | CCDS973.1       | chr1_150940661-150940661_A_G  | 103L>S  | Substitution | Nonsynonymous coding | 23% |
| MM04T | CETN1    | centrin, EF-hand protein, 1                                                                                                                                                     | CCDS11820.1     | chr18_580508-580508_C_T       | 34R>W   | Substitution | Nonsynonymous coding | 30% |
| MM04T | CFDP1    | craniofacial development protein 1                                                                                                                                              | CCDS10916.1     | chr16_75338946-75338946_G_A   | 262A>V  | Substitution | Nonsynonymous coding | 29% |
| MM04T | CFDP1    | craniofacial development protein 1                                                                                                                                              | CCDS10916.1     | chr16_75445788-75445788_C_A   | 155E>D  | Substitution | Nonsynonymous coding | 29% |
| MM04T | CFH      | complement factor H                                                                                                                                                             | CCDS1385.1      | chr1_196646674-196646674_C_T  | 166R>W  | Substitution | Nonsynonymous coding | 27% |
| MM04T | CFI      | complement factor I                                                                                                                                                             | CCDS34049.1     | chr4_110662266-110662266_C_T  | 512G>D  | Substitution | Nonsynonymous coding | 36% |
| MM04T | CFLAR    | CASP8 and FADD-like apoptosis regulator                                                                                                                                         | CCDS2337.1      | chr2_202010107-202010107_A_C  | 205N>H  | Substitution | Nonsynonymous coding | 18% |
| MM04T | CFTR     | cystic fibrosis transmembrane conductance regulator (ATP-binding cassette sub-family C, cystic fibrosis transmembrane conductance regulator (ATP-binding cassette sub-family C, | CCDS5773.1      | chr7_117232404-117232404_C_A  | 728S>Y  | Substitution | Nonsynonymous coding | 36% |
| MM04T | CFTR     | cystic fibrosis transmembrane conductance regulator (ATP-binding cassette sub-family C,                                                                                         | CCDS5773.1      | chr7_117232688-117232688_G_T  | 823E>X  | Substitution | Nonsense             | 28% |
| MM04T | CGN      | cingulin                                                                                                                                                                        | CCDS999.1       | chr1_151499465-151499465_G_A  | 593R>Q  | Substitution | Nonsynonymous coding | 29% |
| MM04T | CGN      | cingulin                                                                                                                                                                        | CCDS999.1       | chr1_151504980-151504980_C_T  | 892R>C  | Substitution | Nonsynonymous coding | 40% |
| MM04T | CHD1     | chromodomain helicase DNA binding protein 1                                                                                                                                     | CCDS34204.1     | chr5_98215270-98215270_T_G    | 1075N>H | Substitution | Nonsynonymous coding | 40% |
| MM04T | CHD1L    | chromodomain helicase DNA binding protein 1-like                                                                                                                                | CCDS927.1       | chr1_146757128-146757128_A_C  | 661K>T  | Substitution | Nonsynonymous coding | 30% |
| MM04T | CHD5     | chromodomain helicase DNA binding protein 5                                                                                                                                     | CCDS57.1        | chr1_6172981-6172981_C_T      | 1664E>K | Substitution | Nonsynonymous coding | 17% |
| MM04T | CHD8     | chromodomain helicase DNA binding protein 8                                                                                                                                     | CCDS45081.1     | chr14_21883122-21883122_C_T   | 388E>K  | Substitution | Nonsynonymous coding | 31% |
| MM04T | CHD9     | chromodomain helicase DNA binding protein 9                                                                                                                                     | CCDS45485.1     | chr16_53260363-53260363_C_A   | 661S>Y  | Substitution | Nonsynonymous coding | 38% |
| MM04T | CHGB     | chromogranin B (secretogranin 1)                                                                                                                                                | CCDS13092.1     | chr20_5903855-5903855_G_T     | 355E>D  | Substitution | Nonsynonymous coding | 24% |
| MM04T | CHI3L1   | chitinase 3-like 1 (cartilage glycoprotein-39)                                                                                                                                  | CCDS1435.1      | chr1_203148971-203148971_C_A  | 310R>I  | Substitution | Nonsynonymous coding | 35% |
| MM04T | CHL1     | cell adhesion molecule with homology to L1CAM (close homolog of L1)                                                                                                             | CCDS2556.1      | chr3_369886-369886_C_A        | 78F>L   | Substitution | Nonsynonymous coding | 29% |
| MM04T | CHL1     | cell adhesion molecule with homology to L1CAM (close homolog of L1)                                                                                                             | CCDS2556.1      | chr3_391135-391135_G_T        | 314E>D  | Substitution | Nonsynonymous coding | 32% |
| MM04T | CHL1     | cell adhesion molecule with homology to L1CAM (close homolog of L1)                                                                                                             | CCDS2556.1      | chr3_432722-432722_A_C        | 891N>H  | Substitution | Nonsynonymous coding | 12% |
| MM04T | CHM      | choroideremia (Rab escort protein 1)                                                                                                                                            | CCDS14454.1     | chrX_85218880-85218880_C_A    | 164E>D  | Substitution | Nonsynonymous coding | 24% |
| MM04T | CHM      | choroideremia (Rab escort protein 1)                                                                                                                                            | CCDS14454.1     | chrX_85212923-85212923_G_A    | 293R>X  | Substitution | Nonsense             | 23% |
| MM04T | CHMP2B   | charged multivesicular body protein 2B                                                                                                                                          | CCDS2918.1      | chr3_87294976-87294976_C_A    | 80S>X   | Substitution | Nonsense             | 14% |
| MM04T | CHMP3    | charged multivesicular body protein 3                                                                                                                                           | CCDS33237.1     | chr2_86847539-86847539_C_T    | 94E>K   | Substitution | Nonsynonymous coding | 33% |
| MM04T | CHMP4C   | charged multivesicular body protein 4C                                                                                                                                          | CCDS6233.1      | chr8_82665399-82665399_G_T    | 97E>D   | Substitution | Nonsynonymous coding | 23% |

|       |             |                                                                       |             |                               |         |              |                      |     |
|-------|-------------|-----------------------------------------------------------------------|-------------|-------------------------------|---------|--------------|----------------------|-----|
| MM04T | CHN2        | chimerin 2                                                            | CCDS5420.1  | chr7_29546951-29546951_G_T    | 367D>Y  | Substitution | Nonsynonymous coding | 13% |
| MM04T | CHRD1       | chordin-like 1                                                        | CCDS48149.1 | chrX_109919523-109919523_C_A  | 438R>I  | Substitution | Nonsynonymous coding | 21% |
| MM04T | CHRD2       | chordin-like 2                                                        | CCDS8234.1  | chr11_74408272-74408272_T_C   | 416T>A  | Substitution | Nonsynonymous coding | 42% |
| MM04T | CHRNA1      | cholinergic receptor, nicotinic, alpha 1 (muscle)                     | CCDS33331.1 | chr2_175614733-175614733_C_T  | 340V>I  | Substitution | Nonsynonymous coding | 29% |
| MM04T | CHRNA5      | cholinergic receptor, nicotinic, alpha 5 (neuronal)                   | CCDS10304.1 | chr15_78882291-78882291_G_T   | 186M>I  | Substitution | Nonsynonymous coding | 20% |
| MM04T | CHRNA5      | cholinergic receptor, nicotinic, alpha 5 (neuronal)                   | CCDS10304.1 | chr15_78882538-78882538_G_A   | 269V>I  | Substitution | Nonsynonymous coding | 31% |
| MM04T | CHRN1       | cholinergic receptor, nicotinic, beta 1 (muscle)                      | CCDS11106.1 | chr17_7358619-7358619_T_G     | 354L>R  | Substitution | Nonsynonymous coding | 28% |
| MM04T | CHRN4       | cholinergic receptor, nicotinic, beta 4 (neuronal)                    | CCDS10306.1 | chr15_78923451-78923451_C_T   | 109R>H  | Substitution | Nonsynonymous coding | 18% |
| MM04T | CHST10      | carbohydrate sulfotransferase 10                                      | CCDS2047.1  | chr2_101010210-101010210_C_A  | 190D>Y  | Substitution | Nonsynonymous coding | 28% |
| MM04T | CHST14      | carbohydrate (N-acetylgalactosamine 4-O) sulfotransferase 14          | CCDS10059.1 | chr15_40764038-40764038_T_G   | 209F>C  | Substitution | Nonsynonymous coding | 34% |
| MM04T | CHSY3       | chondroitin sulfate synthase 3                                        | CCDS34223.1 | chr5_129520570-129520570_G_T  | 579D>Y  | Substitution | Nonsynonymous coding | 35% |
| MM04T | CHTOP       | chromatin target of PRMT1                                             | CCDS1048.1  | chr1_153610824-153610824_C_T  | 40S>L   | Substitution | Nonsynonymous coding | 24% |
| MM04T | CHUK        | conserved helix-loop-helix ubiquitous kinase                          | CCDS7488.1  | chr10_101978817-101978817_C_A | 213E>X  | Substitution | Nonsense             | 30% |
| MM04T | CHURC1-FNTB | CHURC1-FNTB readthrough                                               | CCDS9769.1  | chr14_65507588-65507588_C_T   | 258A>V  | Substitution | Nonsynonymous coding | 23% |
| MM04T | CHURC1-FNTB | CHURC1-FNTB readthrough                                               | CCDS9769.1  | chr14_65511053-65511053_C_T   | 283R>X  | Substitution | Nonsense             | 19% |
| MM04T | CILP        | cartilage intermediate layer protein, nucleotide pyrophosphohydrolase | CCDS10203.1 | chr15_65490910-65490910_G_A   | 572R>C  | Substitution | Nonsynonymous coding | 35% |
| MM04T | CILP2       | cartilage intermediate layer protein 2                                | CCDS12405.1 | chr19_19655276-19655276_G_A   | 641G>D  | Substitution | Nonsynonymous coding | 36% |
| MM04T | CIRH1A      | cirrhosis, autosomal recessive 1A (cirhin)                            | CCDS10872.1 | chr16_69188352-69188352_A_G   | 386K>E  | Substitution | Nonsynonymous coding | 26% |
| MM04T | CIZ1        | CDKN1A interacting zinc finger protein 1                              | CCDS6894.1  | chr9_130931738-130931738_G_A  | 698R>C  | Substitution | Nonsynonymous coding | 21% |
| MM04T | CKAP2L      | cytoskeleton associated protein 2-like                                | CCDS2100.1  | chr2_113496500-113496500_G_T  | 713S>Y  | Substitution | Nonsynonymous coding | 34% |
| MM04T | CKAP2L      | cytoskeleton associated protein 2-like                                | CCDS2100.1  | chr2_113509900-113509900_C_T  | 516E>K  | Substitution | Nonsynonymous coding | 34% |
| MM04T | CKAP5       | cytoskeleton associated protein 5                                     | CCDS31477.1 | chr11_46773021-46773021_G_T   | 1733L>I | Substitution | Nonsynonymous coding | 26% |
| MM04T | CKAP5       | cytoskeleton associated protein 5                                     | CCDS31477.1 | chr11_46784660-46784660_A_G   | 1253F>L | Substitution | Nonsynonymous coding | 21% |
| MM04T | CLASP2      | cytoplasmic linker associated protein 2                               | NM_015097   | chr3_33592757-33592757_G_T    | 1047S>Y | Substitution | Nonsynonymous coding | 27% |
| MM04T | CLASP2      | cytoplasmic linker associated protein 2                               | NM_015097   | chr3_33612281-33612281_G_A    | 901R>X  | Substitution | Nonsense             | 13% |
| MM04T | CLASRP      | CLK4-associating serine/arginine rich protein                         | CCDS12652.2 | chr19_4555366-4555366_G_A     | 46R>Q   | Substitution | Nonsynonymous coding | 25% |
| MM04T | CLCA1       | chloride channel accessory 1                                          | CCDS709.1   | chr1_86951231-86951231_C_T    | 314S>F  | Substitution | Nonsynonymous coding | 18% |
| MM04T | CLCA2       | chloride channel accessory 2                                          | CCDS708.1   | chr1_86900235-86900235_A_G    | 260Q>R  | Substitution | Nonsynonymous coding | 33% |
| MM04T | CLCA4       | chloride channel accessory 4                                          | CCDS41355.1 | chr1_87041178-87041178_A_G    | 616E>G  | Substitution | Nonsynonymous coding | 20% |
| MM04T | CLCN5       | chloride channel, voltage-sensitive 5                                 | CCDS48115.1 | chrX_49855395-49855395_C_T    | 738P>S  | Substitution | Nonsynonymous coding | 24% |
| MM04T | CLCN5       | chloride channel, voltage-sensitive 5                                 | CCDS48115.1 | chrX_49855431-49855431_C_T    | 750R>W  | Substitution | Nonsynonymous coding | 24% |
| MM04T | CLCN7       | chloride channel, voltage-sensitive 7                                 | CCDS32361.1 | chr16_1505209-1505209_G_T     | 342L>M  | Substitution | Nonsynonymous coding | 15% |

|       |         |                                                                      |                 |                               |         |              |                      |     |
|-------|---------|----------------------------------------------------------------------|-----------------|-------------------------------|---------|--------------|----------------------|-----|
| MM04T | CLDN10  | claudin 10                                                           | CCDS9476.1      | chr13_96212438-96212438_C_A   | 91F>L   | Substitution | Nonsynonymous coding | 19% |
| MM04T | CLEC16A | C-type lectin domain family 16, member A                             | ENST00000428742 | chr16_11250936-11250936_T_G   | 150F>V  | Substitution | Nonsynonymous coding | 36% |
| MM04T | CLEC1A  | C-type lectin domain family 1, member A                              | CCDS8612.1      | chr12_10225898-10225898_G_T   | 219S>Y  | Substitution | Nonsynonymous coding | 21% |
| MM04T | CLEC7A  | C-type lectin domain family 7, member A                              | CCDS41753.1     | chr12_10277925-10277925_G_T   | 155L>I  | Substitution | Nonsynonymous coding | 35% |
| MM04T | CLEC7A  | C-type lectin domain family 7, member A                              | CCDS41753.1     | chr12_10271190-10271190_C_T   | NA      | Substitution | Splice site acceptor | 31% |
| MM04T | CLECL1  | C-type lectin-like 1                                                 | CCDS8603.1      | chr12_9885661-9885661_G_T     | 67S>X   | Substitution | Nonsense             | 29% |
| MM04T | CLGN    | calmegin                                                             | CCDS3751.1      | chr4_141317282-141317282_A_C  | 321F>C  | Substitution | Nonsynonymous coding | 33% |
| MM04T | CLHC1   | clathrin heavy chain linker domain containing 1                      | CCDS33201.1     | chr2_55439929-55439929_C_T    | 127E>K  | Substitution | Nonsynonymous coding | 36% |
| MM04T | CLHC1   | clathrin heavy chain linker domain containing 1                      | CCDS33201.1     | chr2_55449462-55449462_C_A    | 29R>I   | Substitution | Nonsynonymous coding | 21% |
| MM04T | CLIC2   | chloride intracellular channel 2                                     | CCDS14767.1     | chrX_154508596-154508596_C_A  | 142E>X  | Substitution | Nonsense             | 31% |
| MM04T | CLIC4   | chloride intracellular channel 4                                     | CCDS256.1       | chr1_25167277-25167277_A_C    | 204K>T  | Substitution | Nonsynonymous coding | 33% |
| MM04T | CLIC5   | chloride intracellular channel 5                                     | CCDS47438.1     | chr6_45909341-45909341_C_T    | 276D>N  | Substitution | Nonsynonymous coding | 31% |
| MM04T | CLIP1   | CAP-GLY domain containing linker protein 1                           | CCDS9232.1      | chr12_122825734-122825734_C_T | 662E>K  | Substitution | Nonsynonymous coding | 27% |
| MM04T | CLIP4   | CAP-GLY domain containing linker protein family, member 4            | CCDS1770.1      | chr2_29375573-29375573_G_T    | 348K>N  | Substitution | Nonsynonymous coding | 30% |
| MM04T | CLK4    | CDC-like kinase 4                                                    | CCDS4437.1      | chr5_178030676-178030676_C_A  | 463R>I  | Substitution | Nonsynonymous coding | 26% |
| MM04T | CLN5    | ceroid-lipofuscinosis, neuronal 5                                    | CCDS9456.1      | chr13_77574962-77574962_T_G   | 361F>C  | Substitution | Nonsynonymous coding | 32% |
| MM04T | CLNK    | cytokine-dependent hematopoietic cell linker                         | CCDS47024.1     | chr4_10542140-10542140_G_T    | 194P>T  | Substitution | Nonsynonymous coding | 16% |
| MM04T | CLNK    | cytokine-dependent hematopoietic cell linker                         | CCDS47024.1     | chr4_10599665-10599665_C_T    | 7R>K    | Substitution | Nonsynonymous coding | 29% |
| MM04T | CLRN3   | clarin 3                                                             | CCDS7656.1      | chr10_129676622-129676622_C_T | 158E>K  | Substitution | Nonsynonymous coding | 21% |
| MM04T | CLSTN1  | calsyntenin 1                                                        | CCDS30580.1     | chr1_9793473-9793473_C_T      | 805E>K  | Substitution | Nonsynonymous coding | 19% |
| MM04T | CLSTN3  | calsyntenin 3                                                        | ENST00000331148 | chr12_7309210-7309210_G_A     | 80V>M   | Substitution | Nonsynonymous coding | 35% |
| MM04T | CLUH    | clustered mitochondria (cluA/CLU1) homolog                           | CCDS45572.1     | chr17_2600207-2600207_A_G     | 626L>S  | Substitution | Nonsynonymous coding | 35% |
| MM04T | CLUL1   | clusterin-like 1 (retinal)                                           | CCDS42405.1     | chr18_627130-627130_C_A       | 153L>I  | Substitution | Nonsynonymous coding | 21% |
| MM04T | CMAHP   | cytidine monophospho-N-acetylneuraminic acid hydroxylase, pseudogene | ENST00000377989 | chr6_25113968-25113968_C_A    | 49D>Y   | Substitution | Nonsynonymous coding | 21% |
| MM04T | CMTM4   | CKLF-like MARVEL transmembrane domain containing 4                   | CCDS10817.1     | chr16_66656125-66656125_T_C   | 155I>V  | Substitution | Nonsynonymous coding | 27% |
| MM04T | CMTM5   | CKLF-like MARVEL transmembrane domain containing 5                   | CCDS9598.1      | chr14_23847691-23847691_G_A   | 87R>Q   | Substitution | Nonsynonymous coding | 30% |
| MM04T | CMYA5   | cardiomyopathy associated 5                                          | CCDS47238.1     | chr5_79031858-79031858_T_G    | 2424F>V | Substitution | Nonsynonymous coding | 30% |
| MM04T | CNBD1   | cyclic nucleotide binding domain containing 1                        | NM_173538       | chr8_88218342-88218342_G_A    | 185E>K  | Substitution | Nonsynonymous coding | 32% |
| MM04T | CNBD2   | cyclic nucleotide binding domain containing 2                        | CCDS13270.1     | chr20_34618470-34618470_G_A   | 540R>H  | Substitution | Nonsynonymous coding | 33% |
| MM04T | CNDP1   | carnosine dipeptidase 1 (metallopeptidase M20 family)                | CCDS12007.1     | chr18_72238464-72238464_G_A   | 267G>D  | Substitution | Nonsynonymous coding | 35% |
| MM04T | CNDP2   | CNDP dipeptidase 2 (metallopeptidase M20 family)                     | CCDS12006.1     | chr18_72180898-72180898_G_T   | 283D>Y  | Substitution | Nonsynonymous coding | 28% |
| MM04T | CNGA1   | cyclic nucleotide gated channel alpha 1                              | CCDS47050.1     | chr4_47938583-47938583_C_T    | 712R>Q  | Substitution | Nonsynonymous coding | 33% |



|       |         |                                                            |             |                               |         |              |                      |     |
|-------|---------|------------------------------------------------------------|-------------|-------------------------------|---------|--------------|----------------------|-----|
| MM04T | CNGB1   | cyclic nucleotide gated channel beta 1                     | CCDS42169.1 | chr16_57998442-57998442_C_T   | 56E>K   | Substitution | Nonsynonymous coding | 39% |
| MM04T | CNKSR1  | connector enhancer of kinase suppressor of Ras 1           | CCDS276.1   | chr1_26507030-26507030_G_A    | 47E>K   | Substitution | Nonsynonymous coding | 30% |
| MM04T | CNKSR2  | connector enhancer of kinase suppressor of Ras 2           | CCDS14198.1 | chrX_21609167-21609167_G_T    | 562R>L  | Substitution | Nonsynonymous coding | 23% |
| MM04T | CNKSR2  | connector enhancer of kinase suppressor of Ras 2           | CCDS14198.1 | chrX_21627729-21627729_G_A    | 896E>K  | Substitution | Nonsynonymous coding | 33% |
| MM04T | CNNM2   | cyclin M2                                                  | CCDS44474.1 | chr10_104835993-104835993_C_T | 795S>L  | Substitution | Nonsynonymous coding | 39% |
| MM04T | CNNM3   | cyclin M3                                                  | CCDS2025.1  | chr2_97492600-97492600_C_A    | 467S>Y  | Substitution | Nonsynonymous coding | 30% |
| MM04T | CNOT4   | CCR4-NOT transcription complex, subunit 4                  | CCDS43650.1 | chr7_135078728-135078728_G_T  | 520F>L  | Substitution | Nonsynonymous coding | 25% |
| MM04T | CNPY1   | canopy 1 homolog (zebrafish)                               | CCDS43684.1 | chr7_155301653-155301653_T_C  | 27K>R   | Substitution | Nonsynonymous coding | 31% |
| MM04T | CNPY4   | canopy 4 homolog (zebrafish)                               | CCDS34701.1 | chr7_99720131-99720131_G_T    | 91E>D   | Substitution | Nonsynonymous coding | 28% |
| MM04T | CNR1    | cannabinoid receptor 1 (brain)                             | CCDS5015.1  | chr6_88854162-88854162_A_C    | 278F>V  | Substitution | Nonsynonymous coding | 38% |
| MM04T | CNTD1   | cyclin N-terminal domain containing 1                      | CCDS11440.1 | chr17_40956407-40956407_G_A   | 137R>Q  | Substitution | Nonsynonymous coding | 26% |
| MM04T | CNTLN   | centlein, centrosomal protein                              | CCDS43789.1 | chr9_17366712-17366712_G_T    | 662E>X  | Substitution | Nonsense             | 20% |
| MM04T | CNTN1   | contactin 1                                                | CCDS8737.1  | chr12_41333215-41333215_G_T   | 436C>F  | Substitution | Nonsynonymous coding | 37% |
| MM04T | CNTN2   | contactin 2 (axonal)                                       | CCDS1449.1  | chr1_205034232-205034232_C_A  | 513L>I  | Substitution | Nonsynonymous coding | 22% |
| MM04T | CNTN5   | contactin 5                                                | NM_014361   | chr11_99690327-99690327_A_C   | 36R>S   | Substitution | Nonsynonymous coding | 27% |
| MM04T | CNTN6   | contactin 6                                                | CCDS2557.1  | chr3_1445027-1445027_C_A      | 1004F>L | Substitution | Nonsynonymous coding | 24% |
| MM04T | CNTNAP1 | contactin associated protein 1                             | CCDS11436.1 | chr17_40849644-40849644_G_A   | 1214R>Q | Substitution | Nonsynonymous coding | 30% |
| MM04T | CNTNAP2 | contactin associated protein-like 2                        | CCDS5889.1  | chr7_147259350-147259350_G_A  | NA      | Substitution | Splice site donor    | 32% |
| MM04T | CNTNAP4 | contactin associated protein-like 4                        | NM_138994   | chr16_76350369-76350369_G_A   | 24E>K   | Substitution | Nonsynonymous coding | 10% |
| MM04T | CNTNAP4 | contactin associated protein-like 4                        | NM_138994   | chr16_76555192-76555192_C_T   | 768R>W  | Substitution | Nonsynonymous coding | 23% |
| MM04T | CNTNAP5 | contactin associated protein-like 5                        | CCDS46401.1 | chr2_125282006-125282006_C_A  | 484S>Y  | Substitution | Nonsynonymous coding | 33% |
| MM04T | CNTNAP5 | contactin associated protein-like 5                        | CCDS46401.1 | chr2_125405342-125405342_G_T  | 627K>N  | Substitution | Nonsynonymous coding | 24% |
| MM04T | CNTNAP5 | contactin associated protein-like 5                        | CCDS46401.1 | chr2_125530547-125530547_C_T  | 901S>L  | Substitution | Nonsynonymous coding | 29% |
| MM04T | COBL    | cordons-bleu WH2 repeat protein                            | CCDS34637.1 | chr7_51287451-51287451_C_T    | 78V>M   | Substitution | Nonsynonymous coding | 28% |
| MM04T | COCH    | coagulation factor C homolog, cochlin (Limulus polyphemus) | CCDS9640.1  | chr14_31344155-31344155_C_T   | 4A>V    | Substitution | Nonsynonymous coding | 31% |
| MM04T | COCH    | coagulation factor C homolog, cochlin (Limulus polyphemus) | CCDS9640.1  | chr14_31355442-31355442_G_T   | 467K>N  | Substitution | Nonsynonymous coding | 28% |
| MM04T | COL10A1 | collagen, type X, alpha 1                                  | CCDS5105.1  | chr6_116441561-116441561_T_G  | 573K>T  | Substitution | Nonsynonymous coding | 27% |
| MM04T | COL11A1 | collagen, type XI, alpha 1                                 | CCDS779.1   | chr1_103343623-103343623_C_A  | 1803Q>H | Substitution | Nonsynonymous coding | 24% |
| MM04T | COL11A1 | collagen, type XI, alpha 1                                 | CCDS779.1   | chr1_103412409-103412409_G_T  | 1103A>D | Substitution | Nonsynonymous coding | 33% |
| MM04T | COL11A1 | collagen, type XI, alpha 1                                 | CCDS779.1   | chr1_103463886-103463886_G_A  | 738P>S  | Substitution | Nonsynonymous coding | 28% |
| MM04T | COL12A1 | collagen, type XII, alpha 1                                | CCDS43482.1 | chr6_75848594-75848594_C_T    | 1681D>N | Substitution | Nonsynonymous coding | 21% |
| MM04T | COL12A1 | collagen, type XII, alpha 1                                | CCDS43482.1 | chr6_75801203-75801203_T_C    | NA      | Substitution | Splice site donor    | 39% |

|       |          |                                                                  |                |                              |         |              |                      |     |
|-------|----------|------------------------------------------------------------------|----------------|------------------------------|---------|--------------|----------------------|-----|
| MM04T | COL13A1  | collagen, type XIII, alpha 1                                     | CCDS44419.1    | chr10_71562476-71562476_C_A  | NA      | Substitution | Splice site donor    | 15% |
| MM04T | COL14A1  | collagen, type XIV, alpha 1                                      | CCDS34938.1    | chr8_121216025-121216025_G_A | 319E>K  | Substitution | Nonsynonymous coding | 34% |
| MM04T | COL22A1  | collagen, type XXII, alpha 1                                     | CCDS6376.1     | chr8_139890361-139890361_G_A | 97S>L   | Substitution | Nonsynonymous coding | 16% |
| MM04T | COL22A1  | collagen, type XXII, alpha 1                                     | CCDS6376.1     | chr8_139618686-139618686_C_A | 1348G>X | Substitution | Nonsense             | 23% |
| MM04T | COL23A1  | collagen, type XXIII, alpha 1                                    | CCDS4436.1     | chr5_177688753-177688753_G_A | NA      | Substitution | Splice site acceptor | 22% |
| MM04T | COL23A1  | collagen, type XXIII, alpha 1                                    | CCDS4436.1     | chr5_177677059-177677059_G_T | NA      | Substitution | Splice site donor    | 20% |
| MM04T | COL24A1  | collagen, type XXIV, alpha 1                                     | CCDS41353.1    | chr1_86196234-86196234_G_T   | 1714L>M | Substitution | Nonsynonymous coding | 11% |
| MM04T | COL27A1  | collagen, type XXVII, alpha 1                                    | CCDS6802.1     | chr9_116972007-116972007_G_T | 774R>L  | Substitution | Nonsynonymous coding | 18% |
| MM04T | COL28A1  | collagen, type XXVIII, alpha 1                                   | CCDS43553.1    | chr7_7398346-7398346_C_T     | 1099R>Q | Substitution | Nonsynonymous coding | 23% |
| MM04T | COL3A1   | collagen, type III, alpha 1                                      | CCDS2297.1     | chr2_189857638-189857638_C_T | 341A>V  | Substitution | Nonsynonymous coding | 24% |
| MM04T | COL4A3BP | collagen, type IV, alpha 3 (Goodpasture antigen) binding protein | CCDS47235.1    | chr5_74754985-74754985_G_A   | 213R>X  | Substitution | Nonsense             | 27% |
| MM04T | COL4A4   | collagen, type IV, alpha 4                                       | CCDS42828.1    | chr2_228004894-228004894_G_A | 59P>S   | Substitution | Nonsynonymous coding | 32% |
| MM04T | COL4A5   | collagen, type IV, alpha 5                                       | CCDS35366.1    | chrX_107826148-107826148_C_T | 324P>L  | Substitution | Nonsynonymous coding | 15% |
| MM04T | COL4A6   | collagen, type IV, alpha 6                                       | CCDS14541.1    | chrX_107446215-107446215_G_A | NA      | Substitution | Splice site acceptor | 30% |
| MM04T | COL5A3   | collagen, type V, alpha 3                                        | CCDS12222.1    | chr19_10108798-10108798_C_A  | 380E>X  | Substitution | Nonsense             | 28% |
| MM04T | COL6A1   | collagen, type VI, alpha 1                                       | CCDS13727.1    | chr21_47421891-47421891_C_T  | 658S>L  | Substitution | Nonsynonymous coding | 28% |
| MM04T | COL6A2   | collagen, type VI, alpha 2                                       | CCDS13728.1    | chr21_47552261-47552261_C_T  | 952T>M  | Substitution | Nonsynonymous coding | 31% |
| MM04T | COL6A3   | collagen, type VI, alpha 3                                       | CCDS33412.1    | chr2_238265984-238265984_C_A | 2196K>N | Substitution | Nonsynonymous coding | 25% |
| MM04T | COL6A3   | collagen, type VI, alpha 3                                       | CCDS33412.1    | chr2_238277271-238277271_G_A | 1612S>L | Substitution | Nonsynonymous coding | 29% |
| MM04T | COL6A5   | collagen, type VI, alpha 5                                       | NM_153264      | chr3_130159057-130159057_G_T | 1959D>Y | Substitution | Nonsynonymous coding | 20% |
| MM04T | COL6A6   | collagen, type VI, alpha 6                                       | CCDS46911.1    | chr3_130292929-130292929_G_T | 1036R>I | Substitution | Nonsynonymous coding | 19% |
| MM04T | COL6A6   | collagen, type VI, alpha 6                                       | CCDS46911.1    | chr3_130300451-130300451_G_T | 1198E>D | Substitution | Nonsynonymous coding | 25% |
| MM04T | COL6A6   | collagen, type VI, alpha 6                                       | CCDS46911.1    | chr3_130325771-130325771_T_G | NA      | Substitution | Splice site acceptor | 32% |
| MM04T | COL6A6   | collagen, type VI, alpha 6                                       | CCDS46911.1    | chr3_130313176-130313176_C_T | 1508R>X | Substitution | Nonsense             | 15% |
| MM04T | COL7A1   | collagen, type VII, alpha 1                                      | CCDS2773.1     | chr3_48611705-48611705_T_G   | 2164E>A | Substitution | Nonsynonymous coding | 19% |
| MM04T | COL7A1   | collagen, type VII, alpha 1                                      | CCDS2773.1     | chr3_48619347-48619347_T_G   | 1555E>D | Substitution | Nonsynonymous coding | 27% |
| MM04T | COL9A1   | collagen, type IX, alpha 1                                       | CCDS4971.1     | chr6_70944265-70944265_T_G   | 764Q>P  | Substitution | Nonsynonymous coding | 36% |
| MM04T | COLEC12  | collectin sub-family member 12                                   | CCDS32782.1    | chr18_347250-347250_C_A      | 124E>D  | Substitution | Nonsynonymous coding | 31% |
| MM04T | COLEC12  | collectin sub-family member 12                                   | CCDS32782.1    | chr18_357423-357423_G_A      | 53T>I   | Substitution | Nonsynonymous coding | 18% |
| MM04T | COPG2    | coatamer protein complex, subunit gamma 2                        | ENST0000445977 | chr7_130301863-130301863_C_T | 133D>N  | Substitution | Nonsynonymous coding | 24% |
| MM04T | COPZ1    | coatamer protein complex, subunit zeta 1                         | CCDS8877.1     | chr12_54736055-54736055_G_T  | 51K>N   | Substitution | Nonsynonymous coding | 23% |
| MM04T | COQ6     | coenzyme Q6 homolog, monoxygenase (S. cerevisiae)                | CCDS9823.1     | chr14_74420205-74420205_G_T  | 77E>D   | Substitution | Nonsynonymous coding | 32% |

|       |        |                                                             |             |                               |         |              |                      |     |
|-------|--------|-------------------------------------------------------------|-------------|-------------------------------|---------|--------------|----------------------|-----|
| MM04T | CORO1C | coronin, actin binding protein, 1C                          | CCDS9120.1  | chr12_109042747-109042747_G_A | 351P>S  | Substitution | Nonsynonymous coding | 23% |
| MM04T | CORO1C | coronin, actin binding protein, 1C                          | CCDS9120.1  | chr12_109051189-109051189_T_G | 214K>T  | Substitution | Nonsynonymous coding | 28% |
| MM04T | CORO1C | coronin, actin binding protein, 1C                          | CCDS9120.1  | chr12_109072107-109072107_C_A | 87D>Y   | Substitution | Nonsynonymous coding | 22% |
| MM04T | CORO1C | coronin, actin binding protein, 1C                          | CCDS9120.1  | chr12_109072163-109072163_C_T | 68R>Q   | Substitution | Nonsynonymous coding | 33% |
| MM04T | CORO2B | coronin, actin binding protein, 2B                          | NM_006091   | chr15_69011489-69011489_T_C   | 363S>P  | Substitution | Nonsynonymous coding | 13% |
| MM04T | CORO2B | coronin, actin binding protein, 2B                          | NM_006091   | chr15_69018188-69018188_C_T   | 440R>X  | Substitution | Nonsense             | 26% |
| MM04T | CP     | ceruloplasmin (ferroxidase)                                 | CCDS3141.1  | chr7_148925273-148925273_T_G  | 305T>P  | Substitution | Nonsynonymous coding | 24% |
| MM04T | CPA2   | carboxypeptidase A2 (pancreatic)                            | CCDS5817.2  | chr7_129909638-129909638_G_A  | 95V>M   | Substitution | Nonsynonymous coding | 40% |
| MM04T | CPA3   | carboxypeptidase A3 (mast cell)                             | CCDS3138.1  | chr3_148601574-148601574_C_A  | 318S>X  | Substitution | Nonsense             | 33% |
| MM04T | CPAMD8 | C3 and PZP-like, alpha-2-macroglobulin domain containing 8  | CCDS42519.1 | chr19_17120123-17120123_G_T   | 212A>D  | Substitution | Nonsynonymous coding | 18% |
| MM04T | CPED1  | cadherin-like and PC-esterase domain containing 1           | CCDS34739.1 | chr7_120935617-120935617_C_T  | 998R>X  | Substitution | Nonsense             | 26% |
| MM04T | CPNE3  | copine III                                                  | CCDS6243.1  | chr8_87544794-87544794_A_C    | 149K>Q  | Substitution | Nonsynonymous coding | 21% |
| MM04T | CPNE3  | copine III                                                  | CCDS6243.1  | chr8_87560543-87560543_C_A    | 298F>L  | Substitution | Nonsynonymous coding | 26% |
| MM04T | CPNE4  | copine IV                                                   | CCDS3072.1  | chr3_131254061-131254061_G_T  | 551S>Y  | Substitution | Nonsynonymous coding | 33% |
| MM04T | CPNE8  | copine VIII                                                 | CCDS8733.1  | chr12_39242357-39242357_T_G   | NA      | Substitution | Splice site donor    | 47% |
| MM04T | CPOX   | coproporphyrinogen oxidase                                  | CCDS2932.1  | chr3_98304474-98304474_C_T    | 328R>H  | Substitution | Nonsynonymous coding | 32% |
| MM04T | CPQ    | carboxypeptidase Q                                          | CCDS6273.1  | chr8_97978196-97978196_G_A    | 295D>N  | Substitution | Nonsynonymous coding | 19% |
| MM04T | CPS1   | carbamoyl-phosphate synthase 1, mitochondrial               | CCDS46505.1 | chr2_211455554-211455554_T_C  | 297F>L  | Substitution | Nonsynonymous coding | 29% |
| MM04T | CPS1   | carbamoyl-phosphate synthase 1, mitochondrial               | CCDS46505.1 | chr2_211465409-211465409_G_T  | 566K>N  | Substitution | Nonsynonymous coding | 27% |
| MM04T | CPS1   | carbamoyl-phosphate synthase 1, mitochondrial               | CCDS46505.1 | chr2_211521333-211521333_A_G  | 1221I>V | Substitution | Nonsynonymous coding | 23% |
| MM04T | CPS1   | carbamoyl-phosphate synthase 1, mitochondrial               | CCDS46505.1 | chr2_211476973-211476973_G_T  | 848E>X  | Substitution | Nonsense             | 33% |
| MM04T | CPSF2  | cleavage and polyadenylation specific factor 2, 100kDa      | CCDS9902.1  | chr14_92627992-92627992_C_A   | NA      | Substitution | Splice site acceptor | 34% |
| MM04T | CPSF4  | cleavage and polyadenylation specific factor 4, 30kDa       | CCDS5664.1  | chr7_99042437-99042437_C_A    | 43F>L   | Substitution | Nonsynonymous coding | 36% |
| MM04T | CPSF6  | cleavage and polyadenylation specific factor 6, 68kDa       | CCDS8988.1  | chr12_69653297-69653297_C_T   | 430S>L  | Substitution | Nonsynonymous coding | 30% |
| MM04T | CPSF7  | cleavage and polyadenylation specific factor 7, 59kDa       | CCDS8006.2  | chr11_61188974-61188974_G_T   | 97P>H   | Substitution | Nonsynonymous coding | 27% |
| MM04T | CPT1A  | carnitine palmitoyltransferase 1A (liver)                   | CCDS8185.1  | chr11_68525188-68525188_C_T   | 749R>H  | Substitution | Nonsynonymous coding | 32% |
| MM04T | CPT1B  | carnitine palmitoyltransferase 1B (muscle)                  | CCDS14098.1 | chr22_51015399-51015399_C_T   | 116V>I  | Substitution | Nonsynonymous coding | 25% |
| MM04T | CPVL   | carboxypeptidase, vitellogenic-like                         | CCDS5419.1  | chr7_29134713-29134713_T_C    | 150Y>C  | Substitution | Nonsynonymous coding | 27% |
| MM04T | CPXCR1 | CPX chromosome region, candidate 1                          | CCDS14458.1 | chrX_88008898-88008898_C_A    | 161F>L  | Substitution | Nonsynonymous coding | 28% |
| MM04T | CPXM2  | carboxypeptidase X (M14 family), member 2                   | CCDS7637.1  | chr10_125521676-125521676_C_T | 497E>K  | Substitution | Nonsynonymous coding | 19% |
| MM04T | CR1    | complement component (3b/4b) receptor 1 (Knops blood group) | CCDS44308.1 | chr1_207782641-207782641_C_A  | 1968S>Y | Substitution | Nonsynonymous coding | 33% |
| MM04T | CR1L   | complement component (3b/4b) receptor 1-like                | CCDS44310.1 | chr1_207851630-207851630_C_A  | 122S>Y  | Substitution | Nonsynonymous coding | 15% |

|       |            |                                                           |             |                              |         |              |                      |     |
|-------|------------|-----------------------------------------------------------|-------------|------------------------------|---------|--------------|----------------------|-----|
| MM04T | CR2        | complement component (3d/Epstein Barr virus) receptor 2   | CCDS31007.1 | chr1_207643042-207643042_A_T | 274I>F  | Substitution | Nonsynonymous coding | 20% |
| MM04T | CRB1       | crumbs homolog 1 (Drosophila)                             | CCDS1390.1  | chr1_197396899-197396899_G_A | 815G>E  | Substitution | Nonsynonymous coding | 41% |
| MM04T | CRB1       | crumbs homolog 1 (Drosophila)                             | CCDS1390.1  | chr1_197404628-197404628_A_G | 1212E>G | Substitution | Nonsynonymous coding | 37% |
| MM04T | CRB1       | crumbs homolog 1 (Drosophila)                             | CCDS1390.1  | chr1_197404724-197404724_T_G | 1244F>C | Substitution | Nonsynonymous coding | 37% |
| MM04T | CRB2       | crumbs homolog 2 (Drosophila)                             | CCDS6852.2  | chr9_126133712-126133712_G_A | 764R>Q  | Substitution | Nonsynonymous coding | 18% |
| MM04T | CRELD1     | cysteine-rich with EGF-like domains 1                     | CCDS2593.1  | chr3_9986110-9986110_C_A     | 370F>L  | Substitution | Nonsynonymous coding | 15% |
| MM04T | CRHR1      | corticotropin releasing hormone receptor 1                | CCDS45712.1 | chr17_43911378-43911378_C_A  | 386F>L  | Substitution | Nonsynonymous coding | 26% |
| MM04T | CRNKL1     | crooked neck pre-mRNA splicing factor-like 1 (Drosophila) | CCDS33446.1 | chr20_20030037-20030037_A_C  | 242I>M  | Substitution | Nonsynonymous coding | 31% |
| MM04T | CRNKL1     | crooked neck pre-mRNA splicing factor-like 1 (Drosophila) | CCDS33446.1 | chr20_20031218-20031218_A_C  | 195L>V  | Substitution | Nonsynonymous coding | 43% |
| MM04T | CRTAP      | cartilage associated protein                              | CCDS2657.1  | chr3_33174060-33174060_G_T   | 312K>N  | Substitution | Nonsynonymous coding | 25% |
| MM04T | CRY2       | cryptochrome 2 (photolyase-like)                          | CCDS7915.2  | chr11_45891090-45891090_T_G  | 327F>V  | Substitution | Nonsynonymous coding | 23% |
| MM04T | CRYBA4     | crystallin, beta A4                                       | CCDS13841.1 | chr22_27024290-27024290_G_T  | 113E>D  | Substitution | Nonsynonymous coding | 19% |
| MM04T | CSDE1      | cold shock domain containing E1, RNA-binding              | CCDS44197.1 | chr1_115267948-115267948_G_T | 564F>L  | Substitution | Nonsynonymous coding | 22% |
| MM04T | CSF1R      | colony stimulating factor 1 receptor                      | CCDS4302.1  | chr5_149457758-149457758_G_A | 216R>X  | Substitution | Nonsense             | 32% |
| MM04T | CSGALNACT1 | chondroitin sulfate N-acetylgalactosaminyltransferase 1   | CCDS6010.1  | chr8_19316124-19316124_T_C   | 222T>A  | Substitution | Nonsynonymous coding | 33% |
| MM04T | CSMD2      | CUB and Sushi multiple domains 2                          | CCDS380.1   | chr1_34003202-34003202_G_T   | 3069F>L | Substitution | Nonsynonymous coding | 31% |
| MM04T | CSMD2      | CUB and Sushi multiple domains 2                          | CCDS380.1   | chr1_34083155-34083155_G_A   | 1924R>C | Substitution | Nonsynonymous coding | 29% |
| MM04T | CSMD2      | CUB and Sushi multiple domains 2                          | CCDS380.1   | chr1_34100838-34100838_A_C   | 1648F>V | Substitution | Nonsynonymous coding | 25% |
| MM04T | CSMD2      | CUB and Sushi multiple domains 2                          | CCDS380.1   | chr1_34181930-34181930_G_T   | 1018S>Y | Substitution | Nonsynonymous coding | 25% |
| MM04T | CSMD3      | CUB and Sushi multiple domains 3                          | CCDS6315.1  | chr8_113293531-113293531_C_T | 3127R>Q | Substitution | Nonsynonymous coding | 40% |
| MM04T | CSMD3      | CUB and Sushi multiple domains 3                          | CCDS6315.1  | chr8_113331084-113331084_C_T | 2448A>T | Substitution | Nonsynonymous coding | 30% |
| MM04T | CSMD3      | CUB and Sushi multiple domains 3                          | CCDS6315.1  | chr8_113585840-113585840_G_A | 1311T>I | Substitution | Nonsynonymous coding | 24% |
| MM04T | CSMD3      | CUB and Sushi multiple domains 3                          | CCDS6315.1  | chr8_113657379-113657379_G_T | 1090S>Y | Substitution | Nonsynonymous coding | 33% |
| MM04T | CSMD3      | CUB and Sushi multiple domains 3                          | CCDS6315.1  | chr8_113649235-113649235_C_A | NA      | Substitution | Splice site acceptor | 27% |
| MM04T | CSMD3      | CUB and Sushi multiple domains 3                          | CCDS6315.1  | chr8_113353841-113353841_C_A | 2173E>X | Substitution | Nonsense             | 34% |
| MM04T | CSN3       | casein kappa                                              | CCDS3538.1  | chr4_71115153-71115153_G_A   | 176A>T  | Substitution | Nonsynonymous coding | 28% |
| MM04T | CSNK1G1    | casein kinase 1, gamma 1                                  | CCDS10192.2 | chr15_64543750-64543750_G_T  | 85H>N   | Substitution | Nonsynonymous coding | 35% |
| MM04T | CSRNP2     | cysteine-serine-rich nuclear protein 2                    | CCDS8807.1  | chr12_51458222-51458222_G_T  | 313F>L  | Substitution | Nonsynonymous coding | 22% |
| MM04T | CSRNP3     | cysteine-serine-rich nuclear protein 3                    | CCDS2225.1  | chr2_166535733-166535733_C_A | 410L>I  | Substitution | Nonsynonymous coding | 21% |
| MM04T | CSRP2BP    | CSRP2 binding protein                                     | CCDS13133.1 | chr20_18139878-18139878_G_T  | 217E>D  | Substitution | Nonsynonymous coding | 15% |
| MM04T | CST5       | cystatin D                                                | CCDS13162.1 | chr20_23856835-23856835_C_T  | 140R>Q  | Substitution | Nonsynonymous coding | 14% |
| MM04T | CSTF2      | cleavage stimulation factor, 3' pre-RNA, subunit 2, 64kDa | CCDS14473.1 | chrX_100088421-100088421_C_A | 487P>Q  | Substitution | Nonsynonymous coding | 33% |

|       |              |                                                              |                 |                               |         |              |                      |     |
|-------|--------------|--------------------------------------------------------------|-----------------|-------------------------------|---------|--------------|----------------------|-----|
| MM04T | CSTL1        | cystatin-like 1                                              | CCDS13153.1     | chr20_23425407-23425407_G_T   | NA      | Substitution | Splice site acceptor | 22% |
| MM04T | CTCF         | CCCTC-binding factor (zinc finger protein)                   | CCDS10841.1     | chr16_67650677-67650677_G_A   | 328D>N  | Substitution | Nonsynonymous coding | 39% |
| MM04T | CTCFL        | CCCTC-binding factor (zinc finger protein)-like              | CCDS13459.1     | chr20_56083819-56083819_C_T   | 506R>H  | Substitution | Nonsynonymous coding | 24% |
| MM04T | CTCFL        | CCCTC-binding factor (zinc finger protein)-like              | CCDS13459.1     | chr20_56099204-56099204_C_T   | 20E>K   | Substitution | Nonsynonymous coding | 35% |
| MM04T | CTD-2116F7.1 | -                                                            | ENST00000397549 | chr17_77681179-77681179_C_T   | 35R>C   | Substitution | Nonsynonymous coding | 28% |
| MM04T | CTNNA2       | catenin (cadherin-associated protein), alpha 2               | ENST00000343114 | chr2_80540750-80540750_T_C    | 22S>P   | Substitution | Nonsynonymous coding | 41% |
| MM04T | CTNNAL1      | catenin (cadherin-associated protein), alpha-like 1          | CCDS6775.1      | chr9_111727805-111727805_T_C  | 482I>V  | Substitution | Nonsynonymous coding | 12% |
| MM04T | CTNNB1       | catenin, beta like 1                                         | CCDS13298.1     | chr20_36365852-36365852_G_T   | 98E>X   | Substitution | Nonsense             | 29% |
| MM04T | CTPS2        | CTP synthase 2                                               | CCDS14175.1     | chrX_16717187-16717187_C_A    | 66E>X   | Substitution | Nonsense             | 35% |
| MM04T | CTSC         | cathepsin C                                                  | CCDS8282.1      | chr11_88033775-88033775_T_G   | 227K>T  | Substitution | Nonsynonymous coding | 18% |
| MM04T | CTSL2        | cathepsin L2                                                 | CCDS6723.1      | chr9_99799643-99799643_C_T    | 96R>Q   | Substitution | Nonsynonymous coding | 29% |
| MM04T | CTTNBP2NL    | CTTNBP2 N-terminal like                                      | CCDS845.1       | chr1_112999126-112999126_C_T  | 338P>S  | Substitution | Nonsynonymous coding | 24% |
| MM04T | CUBN         | cubilin (intrinsic factor-cobalamin receptor)                | CCDS7113.1      | chr10_16877155-16877155_C_A   | 3407R>I | Substitution | Nonsynonymous coding | 25% |
| MM04T | CUBN         | cubilin (intrinsic factor-cobalamin receptor)                | CCDS7113.1      | chr10_16916380-16916380_C_T   | 3077E>K | Substitution | Nonsynonymous coding | 35% |
| MM04T | CUBN         | cubilin (intrinsic factor-cobalamin receptor)                | CCDS7113.1      | chr10_16946010-16946010_C_T   | 2673E>K | Substitution | Nonsynonymous coding | 40% |
| MM04T | CUBN         | cubilin (intrinsic factor-cobalamin receptor)                | CCDS7113.1      | chr10_17026263-17026263_C_T   | 1456D>N | Substitution | Nonsynonymous coding | 32% |
| MM04T | CUBN         | cubilin (intrinsic factor-cobalamin receptor)                | CCDS7113.1      | chr10_17153023-17153023_C_T   | 304E>K  | Substitution | Nonsynonymous coding | 32% |
| MM04T | CUL4B        | cullin 4B                                                    | CCDS35379.1     | chrX_119674251-119674251_C_A  | 555R>I  | Substitution | Nonsynonymous coding | 36% |
| MM04T | CUL5         | cullin 5                                                     | CCDS31668.1     | chr11_107968435-107968435_T_G | 660F>V  | Substitution | Nonsynonymous coding | 17% |
| MM04T | CUL7         | cullin 7                                                     | CCDS4881.1      | chr6_43017401-43017401_C_A    | NA      | Substitution | Splice site acceptor | 28% |
| MM04T | CUX2         | cut-like homeobox 2                                          | CCDS41837.1     | chr12_111749912-111749912_A_G | 637T>A  | Substitution | Nonsynonymous coding | 24% |
| MM04T | CUZD1        | CUB and zona pellucida-like domains 1                        | CCDS7631.1      | chr10_124593209-124593209_G_A | 544R>X  | Substitution | Nonsense             | 34% |
| MM04T | CWC25        | CWC25 spliceosome-associated protein homolog (S. cerevisiae) | CCDS45663.1     | chr17_36958958-36958958_G_T   | 386F>L  | Substitution | Nonsynonymous coding | 23% |
| MM04T | CWH43        | cell wall biogenesis 43 C-terminal homolog (S. cerevisiae)   | CCDS3486.1      | chr4_49032943-49032943_G_T    | 492D>Y  | Substitution | Nonsynonymous coding | 34% |
| MM04T | CWH43        | cell wall biogenesis 43 C-terminal homolog (S. cerevisiae)   | CCDS3486.1      | chr4_49005925-49005925_G_T    | 326E>X  | Substitution | Nonsense             | 27% |
| MM04T | CXCR1        | chemokine (C-X-C motif) receptor 1                           | CCDS2409.1      | chr2_219029355-219029355_C_A  | 194D>Y  | Substitution | Nonsynonymous coding | 17% |
| MM04T | CXorf21      | chromosome X open reading frame 21                           | CCDS14224.1     | chrX_30577684-30577684_C_A    | 263E>D  | Substitution | Nonsynonymous coding | 21% |
| MM04T | CXorf22      | chromosome X open reading frame 22                           | CCDS14237.2     | chrX_35989861-35989861_C_T    | 710S>F  | Substitution | Nonsynonymous coding | 27% |
| MM04T | CXorf30      | chromosome X open reading frame 30                           | ENST00000378653 | chrX_36298626-36298626_G_A    | 221R>K  | Substitution | Nonsynonymous coding | 18% |
| MM04T | CXorf30      | chromosome X open reading frame 30                           | ENST00000378653 | chrX_36298629-36298629_G_T    | 222R>I  | Substitution | Nonsynonymous coding | 17% |
| MM04T | CXorf30      | chromosome X open reading frame 30                           | NM_001098843    | chrX_36402918-36402918_G_T    | 567E>X  | Substitution | Nonsense             | 31% |
| MM04T | CXorf36      | chromosome X open reading frame 36                           | CCDS48096.1     | chrX_45059953-45059953_A_C    | 40L>R   | Substitution | Nonsynonymous coding | 24% |

|       |         |                                                                    |                 |                               |        |              |                      |     |
|-------|---------|--------------------------------------------------------------------|-----------------|-------------------------------|--------|--------------|----------------------|-----|
| MM04T | CXorf38 | chromosome X open reading frame 38                                 | CCDS14253.1     | chrX_40489999-40489999_C_A    | 276K>N | Substitution | Nonsynonymous coding | 21% |
| MM04T | CXorf38 | chromosome X open reading frame 38                                 | CCDS14253.1     | chrX_40490015-40490015_C_T    | 271R>Q | Substitution | Nonsynonymous coding | 29% |
| MM04T | CXorf56 | chromosome X open reading frame 56                                 | CCDS14579.1     | chrX_118675357-118675357_C_A  | 180Q>H | Substitution | Nonsynonymous coding | 31% |
| MM04T | CXorf57 | chromosome X open reading frame 57                                 | CCDS14519.1     | chrX_105883929-105883929_C_A  | 628L>I | Substitution | Nonsynonymous coding | 36% |
| MM04T | CXorf57 | chromosome X open reading frame 57                                 | CCDS14519.1     | chrX_105912474-105912474_C_T  | 784T>I | Substitution | Nonsynonymous coding | 30% |
| MM04T | CYB5R2  | cytochrome b5 reductase 2                                          | CCDS7780.1      | chr11_7690933-7690933_C_T     | 61D>N  | Substitution | Nonsynonymous coding | 17% |
| MM04T | CYBB    | cytochrome b-245, beta polypeptide                                 | CCDS14242.1     | chrX_37663335-37663335_C_A    | 368A>D | Substitution | Nonsynonymous coding | 31% |
| MM04T | CYBRD1  | cytochrome b reductase 1                                           | CCDS2244.1      | chr2_172411294-172411294_G_T  | 273R>I | Substitution | Nonsynonymous coding | 26% |
| MM04T | CYP17A1 | cytochrome P450, family 17, subfamily A, polypeptide 1             | CCDS7541.1      | chr10_104593852-104593852_A_C | 232L>V | Substitution | Nonsynonymous coding | 11% |
| MM04T | CYP1A1  | cytochrome P450, family 1, subfamily A, polypeptide 1              | CCDS10268.1     | chr15_75015123-75015123_G_A   | 106R>W | Substitution | Nonsynonymous coding | 11% |
| MM04T | CYP1A1  | cytochrome P450, family 1, subfamily A, polypeptide 1              | CCDS10268.1     | chr15_75015426-75015426_T_C   | 5I>V   | Substitution | Nonsynonymous coding | 26% |
| MM04T | CYP1A2  | cytochrome P450, family 1, subfamily A, polypeptide 2              | CCDS32293.1     | chr15_75042744-75042744_A_G   | 222N>S | Substitution | Nonsynonymous coding | 22% |
| MM04T | CYP1B1  | cytochrome P450, family 1, subfamily B, polypeptide 1              | CCDS1793.1      | chr2_38302306-38302306_G_A    | 76R>C  | Substitution | Nonsynonymous coding | 27% |
| MM04T | CYP27C1 | cytochrome P450, family 27, subfamily C, polypeptide 1             | CCDS33285.1     | chr2_127961103-127961103_C_A  | 8R>I   | Substitution | Nonsynonymous coding | 22% |
| MM04T | CYP39A1 | cytochrome P450, family 39, subfamily A, polypeptide 1             | CCDS4916.1      | chr6_46604166-46604166_G_T    | 231P>Q | Substitution | Nonsynonymous coding | 29% |
| MM04T | CYP39A1 | cytochrome P450, family 39, subfamily A, polypeptide 1             | CCDS4916.1      | chr6_46607367-46607367_T_G    | 118K>Q | Substitution | Nonsynonymous coding | 36% |
| MM04T | CYP3A5  | cytochrome P450, family 3, subfamily A, polypeptide 5              | CCDS5672.1      | chr7_99261673-99261673_G_T    | 239S>Y | Substitution | Nonsynonymous coding | 13% |
| MM04T | CYP4F8  | cytochrome P450, family 4, subfamily F, polypeptide 8              | ENST00000441682 | chr19_15726598-15726598_G_T   | 57Q>H  | Substitution | Nonsynonymous coding | 27% |
| MM04T | CYP4V2  | cytochrome P450, family 4, subfamily V, polypeptide 2              | CCDS34119.1     | chr4_187131734-187131734_T_C  | 506I>T | Substitution | Nonsynonymous coding | 33% |
| MM04T | CYP4V2  | cytochrome P450, family 4, subfamily V, polypeptide 2              | CCDS34119.1     | chr4_187115653-187115653_G_T  | NA     | Substitution | Splice site acceptor | 23% |
| MM04T | CYP4Z1  | cytochrome P450, family 4, subfamily Z, polypeptide 1              | CCDS545.1       | chr1_47583570-47583570_G_T    | 494K>N | Substitution | Nonsynonymous coding | 29% |
| MM04T | CYP7A1  | cytochrome P450, family 7, subfamily A, polypeptide 1              | CCDS6171.1      | chr8_59404192-59404192_C_T    | 453E>K | Substitution | Nonsynonymous coding | 33% |
| MM04T | CYP7A1  | cytochrome P450, family 7, subfamily A, polypeptide 1              | CCDS6171.1      | chr8_59407144-59407144_C_A    | 320E>D | Substitution | Nonsynonymous coding | 23% |
| MM04T | CYSLTR1 | cysteinyl leukotriene receptor 1                                   | CCDS14439.1     | chrX_77528253-77528253_C_A    | 331G>X | Substitution | Nonsense             | 26% |
| MM04T | CYSLTR2 | cysteinyl leukotriene receptor 2                                   | CCDS9412.1      | chr13_49281354-49281354_T_C   | 134V>A | Substitution | Nonsynonymous coding | 25% |
| MM04T | CYTH3   | cytohesin 3                                                        | CCDS5346.1      | chr7_6217465-6217465_G_T      | 119Y>X | Substitution | Nonsense             | 28% |
| MM04T | DAB2    | disabled homolog 2, mitogen-responsive phosphoprotein (Drosophila) | CCDS34149.1     | chr5_39388915-39388915_T_G    | 204N>H | Substitution | Nonsynonymous coding | 29% |
| MM04T | DAPK1   | death-associated protein kinase 1                                  | CCDS43842.1     | chr9_90255268-90255268_G_T    | 229V>L | Substitution | Nonsynonymous coding | 27% |
| MM04T | DAPK2   | death-associated protein kinase 2                                  | CCDS10188.1     | chr15_64231485-64231485_C_T   | 177E>K | Substitution | Nonsynonymous coding | 17% |
| MM04T | DARS    | aspartyl-tRNA synthetase                                           | CCDS2180.1      | chr2_136680376-136680376_C_A  | 263E>D | Substitution | Nonsynonymous coding | 22% |
| MM04T | DAXX    | death-domain associated protein [Source:HGNC Symbol;Acc:2681]      | CCDS4776.1      | chr6_33288839-33288839_C_T    | 238R>Q | Substitution | Nonsynonymous coding | 22% |
| MM04T | DAZL    | deleted in azoospermia-like                                        | CCDS43059.1     | chr3_16638498-16638498_A_C    | 119L>V | Substitution | Nonsynonymous coding | 26% |

|       |          |                                                                              |                 |                               |         |              |                      |     |
|-------|----------|------------------------------------------------------------------------------|-----------------|-------------------------------|---------|--------------|----------------------|-----|
| MM04T | DBC1     | deleted in bladder cancer 1                                                  | CCDS6822.1      | chr9_121929933-121929933_G_A  | 572S>L  | Substitution | Nonsynonymous coding | 37% |
| MM04T | DBH      | dopamine beta-hydroxylase (dopamine beta-monoxygenase)                       | CCDS6977.2      | chr9_136507452-136507452_G_A  | 204E>K  | Substitution | Nonsynonymous coding | 25% |
| MM04T | DCAF12L1 | DDB1 and CUL4 associated factor 12-like 1                                    | CCDS14610.1     | chrX_125686443-125686443_G_A  | 50S>L   | Substitution | Nonsynonymous coding | 33% |
| MM04T | DCAF12L2 | DDB1 and CUL4 associated factor 12-like 2                                    | CCDS43991.1     | chr8_125299442-125299442_C_T  | 156E>K  | Substitution | Nonsynonymous coding | 17% |
| MM04T | DCAF13   | DDB1 and CUL4 associated factor 13                                           | CCDS34934.1     | chr8_104447873-104447873_C_T  | 421R>C  | Substitution | Nonsynonymous coding | 45% |
| MM04T | DCAF17   | DDB1 and CUL4 associated factor 17                                           | CCDS2243.2      | chr2_172325529-172325529_G_T  | 324D>Y  | Substitution | Nonsynonymous coding | 25% |
| MM04T | DCAF4L1  | DDB1 and CUL4 associated factor 4-like 1                                     | CCDS33978.1     | chr4_41984570-41984570_G_A    | 254R>H  | Substitution | Nonsynonymous coding | 29% |
| MM04T | DCAF4L2  | DDB1 and CUL4 associated factor 4-like 2                                     | CCDS6245.1      | chr8_88885230-88885230_C_T    | 324E>K  | Substitution | Nonsynonymous coding | 32% |
| MM04T | DCAF6    | DDB1 and CUL4 associated factor 6                                            | CCDS1267.2      | chr1_167944141-167944141_A_C  | 109K>T  | Substitution | Nonsynonymous coding | 37% |
| MM04T | DCAF8L2  | DDB1 and CUL4 associated factor 8-like 2                                     | CCDS35222.1     | chrX_27997862-27997862_C_A    | 530Q>H  | Substitution | Nonsynonymous coding | 22% |
| MM04T | DCBLD1   | discoidin, CUB and LCCL domain containing 1                                  | CCDS34522.1     | chr6_117841011-117841011_G_T  | 120E>X  | Substitution | Nonsense             | 27% |
| MM04T | DCC      | deleted in colorectal carcinoma                                              | CCDS11952.1     | chr18_50918172-50918172_C_A   | 868S>Y  | Substitution | Nonsynonymous coding | 27% |
| MM04T | DCDC2C   | doublecortin domain containing 2C                                            | ENST00000399143 | chr2_3802222-3802222_A_C      | 74K>Q   | Substitution | Nonsynonymous coding | 29% |
| MM04T | DCHS1    | dachsous 1 (Drosophila)                                                      | CCDS7771.1      | chr11_6646439-6646439_C_T     | 2379S>N | Substitution | Nonsynonymous coding | 33% |
| MM04T | DCHS1    | dachsous 1 (Drosophila)                                                      | CCDS7771.1      | chr11_6653626-6653626_C_A     | 1039E>D | Substitution | Nonsynonymous coding | 25% |
| MM04T | DCHS1    | dachsous 1 (Drosophila)                                                      | CCDS7771.1      | chr11_6653747-6653747_C_T     | 999R>Q  | Substitution | Nonsynonymous coding | 35% |
| MM04T | DCHS2    | dachsous 2 (Drosophila)                                                      | CCDS3785.1      | chr4_155180900-155180900_T_G  | 1741T>P | Substitution | Nonsynonymous coding | 36% |
| MM04T | DCHS2    | dachsous 2 (Drosophila)                                                      | CCDS3785.1      | chr4_155155756-155155756_C_A  | 2895E>X | Substitution | Nonsense             | 40% |
| MM04T | DCLK1    | doublecortin-like kinase 1                                                   | CCDS9354.1      | chr13_36385090-36385090_C_T   | 524D>N  | Substitution | Nonsynonymous coding | 29% |
| MM04T | DCLK1    | doublecortin-like kinase 1                                                   | CCDS9354.1      | chr13_36401883-36401883_C_A   | 432M>I  | Substitution | Nonsynonymous coding | 29% |
| MM04T | DCLRE1B  | DNA cross-link repair 1B                                                     | CCDS866.1       | chr1_114449747-114449747_C_A  | 107L>I  | Substitution | Nonsynonymous coding | 33% |
| MM04T | DCP2     | DCP2 decapping enzyme homolog (S. cerevisiae)                                | CCDS34210.1     | chr5_112336790-112336790_G_T  | 148E>X  | Substitution | Nonsense             | 39% |
| MM04T | DCPS     | decapping enzyme, scavenger                                                  | CCDS8473.1      | chr11_126215467-126215467_G_T | 325D>Y  | Substitution | Nonsynonymous coding | 22% |
| MM04T | DCST1    | DC-STAMP domain containing 1                                                 | CCDS1083.1      | chr1_155006556-155006556_G_T  | 15R>I   | Substitution | Nonsynonymous coding | 19% |
| MM04T | DCT      | dopachrome tautomerase                                                       | ENST00000377021 | chr13_95096685-95096685_G_T   | 390S>Y  | Substitution | Nonsynonymous coding | 18% |
| MM04T | DCT      | dopachrome tautomerase                                                       | CCDS45060.1     | chr13_95131277-95131277_C_T   | 78R>Q   | Substitution | Nonsynonymous coding | 32% |
| MM04T | DCUN1D4  | DCN1, defective in cullin neddylation 1, domain containing 4 (S. cerevisiae) | CCDS33982.1     | chr4_52777334-52777334_C_A    | 238F>L  | Substitution | Nonsynonymous coding | 28% |
| MM04T | DCUN1D5  | DCN1, defective in cullin neddylation 1, domain containing 5 (S. cerevisiae) | CCDS8325.1      | chr11_102937272-102937272_T_G | 122Q>H  | Substitution | Nonsynonymous coding | 40% |
| MM04T | DDB1     | damage-specific DNA binding protein 1, 127kDa                                | CCDS31576.1     | chr11_61096945-61096945_G_A   | 147R>C  | Substitution | Nonsynonymous coding | 26% |
| MM04T | DDC      | dopa decarboxylase (aromatic L-amino acid decarboxylase)                     | CCDS5511.1      | chr7_50530976-50530976_G_T    | 466H>N  | Substitution | Nonsynonymous coding | 27% |
| MM04T | DDC      | dopa decarboxylase (aromatic L-amino acid decarboxylase)                     | CCDS5511.1      | chr7_50605603-50605603_C_A    | 130K>N  | Substitution | Nonsynonymous coding | 33% |
| MM04T | DDIT4L   | DNA-damage-inducible transcript 4-like                                       | CCDS34036.1     | chr4_101108892-101108892_C_T  | 175R>Q  | Substitution | Nonsynonymous coding | 36% |

|       |         |                                                    |             |                               |         |              |                      |     |
|-------|---------|----------------------------------------------------|-------------|-------------------------------|---------|--------------|----------------------|-----|
| MM04T | DDO     | D-aspartate oxidase                                | CCDS5082.1  | chr6_110726086-110726086_G_A  | 145R>X  | Substitution | Nonsense             | 31% |
| MM04T | DDX10   | DEAD (Asp-Glu-Ala-Asp) box polypeptide 10          | CCDS8342.1  | chr11_108547918-108547918_G_A | 162R>Q  | Substitution | Nonsynonymous coding | 35% |
| MM04T | DDX18   | DEAD (Asp-Glu-Ala-Asp) box polypeptide 18          | CCDS2120.1  | chr2_118572395-118572395_G_T  | 14E>D   | Substitution | Nonsynonymous coding | 27% |
| MM04T | DDX21   | DEAD (Asp-Glu-Ala-Asp) box helicase 21             | CCDS31211.1 | chr10_70742333-70742333_C_A   | 706S>Y  | Substitution | Nonsynonymous coding | 21% |
| MM04T | DDX26B  | DEAD/H (Asp-Glu-Ala-Asp/His) box polypeptide 26B   | CCDS35401.1 | chrX_134679384-134679384_G_A  | 76E>K   | Substitution | Nonsynonymous coding | 27% |
| MM04T | DDX26B  | DEAD/H (Asp-Glu-Ala-Asp/His) box polypeptide 26B   | CCDS35401.1 | chrX_134713730-134713730_G_A  | 676D>N  | Substitution | Nonsynonymous coding | 46% |
| MM04T | DDX26B  | DEAD/H (Asp-Glu-Ala-Asp/His) box polypeptide 26B   | CCDS35401.1 | chrX_134715496-134715496_G_A  | 841E>K  | Substitution | Nonsynonymous coding | 29% |
| MM04T | DDX28   | DEAD (Asp-Glu-Ala-Asp) box polypeptide 28          | CCDS10858.1 | chr16_68056940-68056940_G_T   | 56L>I   | Substitution | Nonsynonymous coding | 24% |
| MM04T | DDX52   | DEAD (Asp-Glu-Ala-Asp) box polypeptide 52          | CCDS11323.1 | chr17_35988719-35988719_A_    | NA      | Deletion     | Splice site acceptor | 11% |
| MM04T | DDX53   | DEAD (Asp-Glu-Ala-Asp) box polypeptide 53          | CCDS35214.1 | chrX_23019031-23019031_C_A    | 286S>Y  | Substitution | Nonsynonymous coding | 34% |
| MM04T | DDX53   | DEAD (Asp-Glu-Ala-Asp) box polypeptide 53          | CCDS35214.1 | chrX_23019046-23019046_G_T    | 291R>I  | Substitution | Nonsynonymous coding | 16% |
| MM04T | DDX53   | DEAD (Asp-Glu-Ala-Asp) box polypeptide 53          | CCDS35214.1 | chrX_23019196-23019196_A_G    | 341D>G  | Substitution | Nonsynonymous coding | 37% |
| MM04T | DDX54   | DEAD (Asp-Glu-Ala-Asp) box polypeptide 54          | CCDS44984.1 | chr12_113603517-113603517_G_A | 551R>C  | Substitution | Nonsynonymous coding | 39% |
| MM04T | DDX59   | DEAD (Asp-Glu-Ala-Asp) box polypeptide 59          | CCDS30964.1 | chr1_200635154-200635154_G_T  | 239L>M  | Substitution | Nonsynonymous coding | 29% |
| MM04T | DDX60   | DEAD (Asp-Glu-Ala-Asp) box polypeptide 60          | CCDS34097.1 | chr4_169157455-169157455_C_A  | 1494R>I | Substitution | Nonsynonymous coding | 18% |
| MM04T | DDX60   | DEAD (Asp-Glu-Ala-Asp) box polypeptide 60          | CCDS34097.1 | chr4_169196591-169196591_G_A  | 737R>W  | Substitution | Nonsynonymous coding | 35% |
| MM04T | DDX60L  | DEAD (Asp-Glu-Ala-Asp) box polypeptide 60-like     | CCDS47161.1 | chr4_169341441-169341441_C_A  | 829D>Y  | Substitution | Nonsynonymous coding | 22% |
| MM04T | DEF6    | differentially expressed in FDCP 6 homolog (mouse) | CCDS4802.1  | chr6_35278298-35278298_G_T    | 100K>N  | Substitution | Nonsynonymous coding | 35% |
| MM04T | DEF6    | differentially expressed in FDCP 6 homolog (mouse) | CCDS4802.1  | chr6_35280507-35280507_G_T    | 255E>D  | Substitution | Nonsynonymous coding | 21% |
| MM04T | DEGS2   | delta(4)-desaturase, sphingolipid 2                | CCDS9956.1  | chr14_100615436-100615436_C_T | 232E>K  | Substitution | Nonsynonymous coding | 19% |
| MM04T | DENND1C | DENN/MADD domain containing 1C                     | CCDS45938.1 | chr19_6477460-6477460_C_T     | 126A>T  | Substitution | Nonsynonymous coding | 14% |
| MM04T | DENND2C | DENN/MADD domain containing 2C                     | CCDS875.1   | chr1_115130025-115130025_C_A  | 856R>I  | Substitution | Nonsynonymous coding | 17% |
| MM04T | DENND2C | DENN/MADD domain containing 2C                     | CCDS875.1   | chr1_115147585-115147585_A_C  | 485F>C  | Substitution | Nonsynonymous coding | 21% |
| MM04T | DENND4A | DENN/MADD domain containing 4A                     | CCDS45285.1 | chr15_66044862-66044862_C_A   | 139R>I  | Substitution | Nonsynonymous coding | 25% |
| MM04T | DENND5A | DENN/MADD domain containing 5A                     | CCDS31423.1 | chr11_9215135-9215135_G_T     | 348S>Y  | Substitution | Nonsynonymous coding | 25% |
| MM04T | DENND5B | DENN/MADD domain containing 5B                     | CCDS44857.1 | chr12_31586133-31586133_G_T   | 688R>S  | Substitution | Nonsynonymous coding | 19% |
| MM04T | DENND5B | DENN/MADD domain containing 5B                     | CCDS44857.1 | chr12_31586172-31586172_T_C   | 675S>G  | Substitution | Nonsynonymous coding | 32% |
| MM04T | DEPDC1B | DEP domain containing 1B                           | CCDS3977.1  | chr5_59943349-59943349_G_T    | 109S>Y  | Substitution | Nonsynonymous coding | 23% |
| MM04T | DEPDC5  | DEP domain containing 5                            | CCDS46692.1 | chr22_32150912-32150912_G_T   | 2R>I    | Substitution | Nonsynonymous coding | 23% |
| MM04T | DEPDC5  | DEP domain containing 5                            | CCDS46692.1 | chr22_32180802-32180802_G_T   | 189D>Y  | Substitution | Nonsynonymous coding | 17% |
| MM04T | DEPDC5  | DEP domain containing 5                            | CCDS46692.1 | chr22_32188763-32188763_C_T   | 243R>X  | Substitution | Nonsense             | 31% |
| MM04T | DGCR14  | DiGeorge syndrome critical region gene 14          | CCDS13756.1 | chr22_19121869-19121869_C_T   | 424R>H  | Substitution | Nonsynonymous coding | 33% |



|       |                |                                                                                     |                 |                               |         |              |                      |     |
|-------|----------------|-------------------------------------------------------------------------------------|-----------------|-------------------------------|---------|--------------|----------------------|-----|
| MM04T | DGCR6          | DiGeorge syndrome critical region gene 6                                            | CCDS13753.1     | chr22_18894195-18894195_G_T   | 76K>N   | Substitution | Nonsynonymous coding | 42% |
| MM04T | DGKB           | diacylglycerol kinase, beta 90kDa                                                   | CCDS47547.1     | chr7_14622735-14622735_G_T    | 488D>E  | Substitution | Nonsynonymous coding | 21% |
| MM04T | DGKB           | diacylglycerol kinase, beta 90kDa                                                   | CCDS47547.1     | chr7_14733744-14733744_C_T    | 223G>R  | Substitution | Nonsynonymous coding | 28% |
| MM04T | DGKB           | diacylglycerol kinase, beta 90kDa                                                   | CCDS47547.1     | chr7_14775701-14775701_G_A    | 96P>L   | Substitution | Nonsynonymous coding | 20% |
| MM04T | DGKB           | diacylglycerol kinase, beta 90kDa                                                   | CCDS47547.1     | chr7_14758242-14758242_C_A    | 131E>X  | Substitution | Nonsense             | 33% |
| MM04T | DGKG           | diacylglycerol kinase, gamma 90kDa                                                  | CCDS3274.1      | chr3_185978295-185978295_G_A  | 453R>W  | Substitution | Nonsynonymous coding | 24% |
| MM04T | DGKI           | diacylglycerol kinase, iota                                                         | CCDS5845.1      | chr7_137263038-137263038_C_T  | 559R>Q  | Substitution | Nonsynonymous coding | 30% |
| MM04T | DHRS7          | dehydrogenase/reductase (SDR family) member 7                                       | CCDS9743.1      | chr14_60616887-60616887_G_A   | 218R>X  | Substitution | Nonsense             | 32% |
| MM04T | DHX29          | DEAH (Asp-Glu-Ala-His) box polypeptide 29                                           | CCDS34158.1     | chr5_54585164-54585164_C_T    | 334E>K  | Substitution | Nonsynonymous coding | 19% |
| MM04T | DHX32          | DEAH (Asp-Glu-Ala-His) box polypeptide 32                                           | CCDS7652.1      | chr10_127542718-127542718_G_T | 302L>I  | Substitution | Nonsynonymous coding | 20% |
| MM04T | DHX32          | DEAH (Asp-Glu-Ala-His) box polypeptide 32                                           | CCDS7652.1      | chr10_127555725-127555725_G_T | 104L>I  | Substitution | Nonsynonymous coding | 23% |
| MM04T | DHX34          | DEAH (Asp-Glu-Ala-His) box polypeptide 34                                           | CCDS12700.1     | chr19_47856348-47856348_G_A   | 21E>K   | Substitution | Nonsynonymous coding | 29% |
| MM04T | DHX36          | DEAH (Asp-Glu-Ala-His) box polypeptide 36                                           | CCDS3171.1      | chr3_153998386-153998386_A_G  | 850L>S  | Substitution | Nonsynonymous coding | 53% |
| MM04T | DHX36          | DEAH (Asp-Glu-Ala-His) box polypeptide 36                                           | CCDS3171.1      | chr3_154032942-154032942_C_A  | 166D>Y  | Substitution | Nonsynonymous coding | 26% |
| MM04T | DIAPH2         | diaphanous homolog 2 (Drosophila)                                                   | CCDS14467.1     | chrX_96185790-96185790_G_A    | 346R>Q  | Substitution | Nonsynonymous coding | 28% |
| MM04T | DIAPH2         | diaphanous homolog 2 (Drosophila)                                                   | CCDS14467.1     | chrX_96330219-96330219_C_A    | 736L>M  | Substitution | Nonsynonymous coding | 24% |
| MM04T | DIAPH3         | diaphanous homolog 3 (Drosophila)                                                   | CCDS41898.1     | chr13_60498968-60498968_G_A   | 704S>L  | Substitution | Nonsynonymous coding | 41% |
| MM04T | DIAPH3         | diaphanous homolog 3 (Drosophila)                                                   | CCDS41898.1     | chr13_60554982-60554982_C_A   | 498D>Y  | Substitution | Nonsynonymous coding | 35% |
| MM04T | DIAPH3         | diaphanous homolog 3 (Drosophila)                                                   | CCDS41898.1     | chr13_60686150-60686150_T_G   | 128K>N  | Substitution | Nonsynonymous coding | 45% |
| MM04T | DICER1         | dicer 1, ribonuclease type III                                                      | CCDS9931.1      | chr14_95562432-95562432_T_G   | 1609N>H | Substitution | Nonsynonymous coding | 33% |
| MM04T | DIDO1          | death inducer-obliterator 1                                                         | CCDS33506.1     | chr20_61542460-61542460_G_A   | 169R>C  | Substitution | Nonsynonymous coding | 33% |
| MM04T | DIP2A          | DIP2 disco-interacting protein 2 homolog A (Drosophila)                             | CCDS46655.1     | chr21_47976927-47976927_G_A   | 1192A>T | Substitution | Nonsynonymous coding | 28% |
| MM04T | DIP2B          | DIP2 disco-interacting protein 2 homolog B (Drosophila)                             | CCDS31799.1     | chr12_51074533-51074533_A_C   | 398K>T  | Substitution | Nonsynonymous coding | 21% |
| MM04T | DIP2C          | DIP2 disco-interacting protein 2 homolog C (Drosophila)                             | CCDS7054.1      | chr10_332263-332263_T_G       | 1357I>L | Substitution | Nonsynonymous coding | 30% |
| MM04T | DIS3           | DIS3 mitotic control homolog (S. cerevisiae)                                        | CCDS9447.1      | chr13_73337650-73337650_C_T   | 689R>Q  | Substitution | Nonsynonymous coding | 31% |
| MM04T | DISP1          | dispatched homolog 1 (Drosophila)                                                   | CCDS1536.1      | chr1_223163992-223163992_C_T  | 189P>S  | Substitution | Nonsynonymous coding | 28% |
| MM04T | DIXDC1         | DIX domain containing 1                                                             | ENST00000440460 | chr11_111864242-111864242_G_A | 431R>H  | Substitution | Nonsynonymous coding | 32% |
| MM04T | DKFZP686J19100 | Polycystic kidney disease protein 1-like 2 [Source:UniProtKB/Swiss-Prot;Acc:Q7Z442] | NM_052892       | chr16_81155263-81155263_G_A   | 2180T>M | Substitution | Nonsynonymous coding | 37% |
| MM04T | DKFZP686J19100 | Polycystic kidney disease protein 1-like 2 [Source:UniProtKB/Swiss-Prot;Acc:Q7Z442] | ENST00000378597 | chr16_81208314-81208314_C_A   | 186G>V  | Substitution | Nonsynonymous coding | 30% |
| MM04T | DKK1           | dickkopf 1 homolog (Xenopus laevis)                                                 | CCDS7246.1      | chr10_54074682-54074682_G_A   | NA      | Substitution | Splice site acceptor | 29% |
| MM04T | DLAT           | dihydroliipoamide S-acetyltransferase                                               | CCDS8354.1      | chr11_111896426-111896426_T_A | 77L>H   | Substitution | Nonsynonymous coding | 19% |
| MM04T | DLAT           | dihydroliipoamide S-acetyltransferase                                               | CCDS8354.1      | chr11_111908137-111908137_G_A | 310E>K  | Substitution | Nonsynonymous coding | 35% |

|       |        |                                                        |                 |                               |         |              |                      |     |
|-------|--------|--------------------------------------------------------|-----------------|-------------------------------|---------|--------------|----------------------|-----|
| MM04T | DLAT   | dihydropolipoamide S-acetyltransferase                 | CCDS8354.1      | chr11_111921971-111921971_G_T | 471R>I  | Substitution | Nonsynonymous coding | 27% |
| MM04T | DLEU1  | deleted in lymphocytic leukemia 1 (non-protein coding) | ENST00000378180 | chr13_50656577-50656577_G_A   | 2R>K    | Substitution | Nonsynonymous coding | 28% |
| MM04T | DLG2   | discs, large homolog 2 (Drosophila)                    | CCDS44690.1     | chr11_83810057-83810057_C_A   | 220G>W  | Substitution | Nonsynonymous coding | 27% |
| MM04T | DLG3   | discs, large homolog 3 (Drosophila)                    | CCDS14403.1     | chrX_69669700-69669700_G_T    | 232G>W  | Substitution | Nonsynonymous coding | 21% |
| MM04T | DLG3   | discs, large homolog 3 (Drosophila)                    | CCDS14403.1     | chrX_69719094-69719094_G_A    | 647E>K  | Substitution | Nonsynonymous coding | 25% |
| MM04T | DLG4   | discs, large homolog 4 (Drosophila)                    | CCDS45599.1     | chr17_7096835-7096835_C_T     | 597E>K  | Substitution | Nonsynonymous coding | 24% |
| MM04T | DLG4   | discs, large homolog 4 (Drosophila)                    | ENST00000451807 | chr17_7111437-7111437_G_A     | 51A>V   | Substitution | Nonsynonymous coding | 23% |
| MM04T | DLL4   | delta-like 4 (Drosophila)                              | CCDS45232.1     | chr15_41228465-41228465_G_A   | 427R>H  | Substitution | Nonsynonymous coding | 20% |
| MM04T | DLX1   | distal-less homeobox 1                                 | ENST00000409492 | chr2_172951750-172951750_G_A  | 228A>T  | Substitution | Nonsynonymous coding | 29% |
| MM04T | DLX6   | distal-less homeobox 6                                 | CCDS47647.1     | chr7_96636974-96636974_A_C    | 126E>A  | Substitution | Nonsynonymous coding | 28% |
| MM04T | DMAP1  | DNA methyltransferase 1 associated protein 1           | CCDS509.1       | chr1_44684037-44684037_G_T    | 150D>Y  | Substitution | Nonsynonymous coding | 31% |
| MM04T | DMBT1  | deleted in malignant brain tumors 1                    | CCDS44490.1     | chr10_124392850-124392850_G_T | 2052D>Y | Substitution | Nonsynonymous coding | 17% |
| MM04T | DMD    | dystrophin                                             | CCDS14233.1     | chrX_32235069-32235069_C_A    | 2134E>D | Substitution | Nonsynonymous coding | 38% |
| MM04T | DMD    | dystrophin                                             | CCDS14233.1     | chrX_32456488-32456488_C_T    | 1314R>Q | Substitution | Nonsynonymous coding | 34% |
| MM04T | DMD    | dystrophin                                             | CCDS14233.1     | chrX_32466695-32466695_T_G    | 1222N>H | Substitution | Nonsynonymous coding | 27% |
| MM04T | DMD    | dystrophin                                             | CCDS14233.1     | chrX_32408299-32408299_C_A    | NA      | Substitution | Splice site acceptor | 34% |
| MM04T | DMD    | dystrophin                                             | CCDS14233.1     | chrX_32591951-32591951_G_A    | 539R>X  | Substitution | Nonsense             | 29% |
| MM04T | DMKN   | dermokine                                              | CCDS46054.1     | chr19_35999141-35999141_C_T   | 347G>D  | Substitution | Nonsynonymous coding | 26% |
| MM04T | DMRT3  | doublesex and mab-3 related transcription factor 3     | CCDS6443.1      | chr9_990856-990856_G_A        | 424V>I  | Substitution | Nonsynonymous coding | 28% |
| MM04T | DMXL1  | Dmx-like 1                                             | CCDS4125.1      | chr5_118465085-118465085_G_T  | 428D>Y  | Substitution | Nonsynonymous coding | 34% |
| MM04T | DMXL1  | Dmx-like 1                                             | CCDS4125.1      | chr5_118485340-118485340_C_T  | 1273S>F | Substitution | Nonsynonymous coding | 31% |
| MM04T | DMXL1  | Dmx-like 1                                             | CCDS4125.1      | chr5_118483114-118483114_G_T  | 954E>X  | Substitution | Nonsense             | 32% |
| MM04T | DNA2   | DNA replication helicase 2 homolog (yeast)             | CCDS44415.1     | chr10_70192052-70192052_A_C   | 681I>S  | Substitution | Nonsynonymous coding | 13% |
| MM04T | DNAH1  | dynein, axonemal, heavy chain 1                        | CCDS46842.1     | chr3_52429683-52429683_A_G    | 3750N>D | Substitution | Nonsynonymous coding | 42% |
| MM04T | DNAH1  | dynein, axonemal, heavy chain 1                        | CCDS46842.1     | chr3_52417886-52417886_G_T    | 2721E>X | Substitution | Nonsense             | 20% |
| MM04T | DNAH10 | dynein, axonemal, heavy chain 10                       | CCDS9255.2      | chr12_124326035-124326035_G_T | 1650R>I | Substitution | Nonsynonymous coding | 20% |
| MM04T | DNAH10 | dynein, axonemal, heavy chain 10                       | CCDS9255.2      | chr12_124416287-124416287_C_T | 4223R>C | Substitution | Nonsynonymous coding | 19% |
| MM04T | DNAH11 | dynein, axonemal, heavy chain 11                       | ENST00000328843 | chr7_21695477-21695477_G_A    | 1663D>N | Substitution | Nonsynonymous coding | 29% |
| MM04T | DNAH11 | dynein, axonemal, heavy chain 11                       | ENST00000328843 | chr7_21784597-21784597_C_T    | 2816T>M | Substitution | Nonsynonymous coding | 32% |
| MM04T | DNAH11 | dynein, axonemal, heavy chain 11                       | ENST00000328843 | chr7_21813561-21813561_G_A    | 3101E>K | Substitution | Nonsynonymous coding | 22% |
| MM04T | DNAH11 | dynein, axonemal, heavy chain 11                       | ENST00000328843 | chr7_21939717-21939717_C_T    | 4435L>F | Substitution | Nonsynonymous coding | 41% |
| MM04T | DNAH17 | dynein, axonemal, heavy chain 17                       | NM_173628       | chr17_76475645-76475645_G_T   | 2608L>M | Substitution | Nonsynonymous coding | 17% |

|       |         |                                              |             |                              |         |              |                      |     |
|-------|---------|----------------------------------------------|-------------|------------------------------|---------|--------------|----------------------|-----|
| MM04T | DNAH17  | dynein, axonemal, heavy chain 17             | NM_173628   | chr17_76488801-76488801_G_A  | 2152P>L | Substitution | Nonsynonymous coding | 29% |
| MM04T | DNAH17  | dynein, axonemal, heavy chain 17             | NM_173628   | chr17_76528637-76528637_G_A  | 1014A>V | Substitution | Nonsynonymous coding | 24% |
| MM04T | DNAH2   | dynein, axonemal, heavy chain 2              | CCDS32551.1 | chr17_7637862-7637862_T_G    | 272L>V  | Substitution | Nonsynonymous coding | 38% |
| MM04T | DNAH2   | dynein, axonemal, heavy chain 2              | CCDS32551.1 | chr17_7734992-7734992_G_T    | 4209D>Y | Substitution | Nonsynonymous coding | 21% |
| MM04T | DNAH2   | dynein, axonemal, heavy chain 2              | CCDS32551.1 | chr17_7630542-7630542_G_T    | 111E>X  | Substitution | Nonsense             | 27% |
| MM04T | DNAH3   | dynein, axonemal, heavy chain 3              | CCDS10594.1 | chr16_20996988-20996988_C_A  | 2359R>L | Substitution | Nonsynonymous coding | 31% |
| MM04T | DNAH3   | dynein, axonemal, heavy chain 3              | CCDS10594.1 | chr16_21147804-21147804_G_A  | 243R>C  | Substitution | Nonsynonymous coding | 32% |
| MM04T | DNAH3   | dynein, axonemal, heavy chain 3              | CCDS10594.1 | chr16_21073847-21073847_C_A  | 1226E>X | Substitution | Nonsense             | 36% |
| MM04T | DNAH5   | dynein, axonemal, heavy chain 5              | CCDS3882.1  | chr5_13729666-13729666_C_T   | 3922G>D | Substitution | Nonsynonymous coding | 48% |
| MM04T | DNAH5   | dynein, axonemal, heavy chain 5              | CCDS3882.1  | chr5_13807742-13807742_C_A   | 2615K>N | Substitution | Nonsynonymous coding | 24% |
| MM04T | DNAH5   | dynein, axonemal, heavy chain 5              | CCDS3882.1  | chr5_13913952-13913952_C_T   | 479R>H  | Substitution | Nonsynonymous coding | 11% |
| MM04T | DNAH6   | dynein, axonemal, heavy chain 6              | CCDS46348.1 | chr2_84752842-84752842_G_T   | 127D>Y  | Substitution | Nonsynonymous coding | 34% |
| MM04T | DNAH6   | dynein, axonemal, heavy chain 6              | CCDS46348.1 | chr2_84846859-84846859_G_A   | 1208R>Q | Substitution | Nonsynonymous coding | 31% |
| MM04T | DNAH7   | dynein, axonemal, heavy chain 7              | CCDS42794.1 | chr2_196737058-196737058_G_T | 2183F>L | Substitution | Nonsynonymous coding | 32% |
| MM04T | DNAH7   | dynein, axonemal, heavy chain 7              | CCDS42794.1 | chr2_196883941-196883941_C_A | 274M>I  | Substitution | Nonsynonymous coding | 23% |
| MM04T | DNAH7   | dynein, axonemal, heavy chain 7              | CCDS42794.1 | chr2_196746611-196746611_G_A | 1957R>X | Substitution | Nonsense             | 32% |
| MM04T | DNAH8   | dynein, axonemal, heavy chain 8              | CCDS4838.1  | chr6_38704921-38704921_C_T   | 64P>S   | Substitution | Nonsynonymous coding | 36% |
| MM04T | DNAH8   | dynein, axonemal, heavy chain 8              | CCDS4838.1  | chr6_38791412-38791412_G_T   | 1048E>D | Substitution | Nonsynonymous coding | 17% |
| MM04T | DNAH8   | dynein, axonemal, heavy chain 8              | CCDS4838.1  | chr6_38862522-38862522_C_A   | 2660L>I | Substitution | Nonsynonymous coding | 21% |
| MM04T | DNAH8   | dynein, axonemal, heavy chain 8              | CCDS4838.1  | chr6_38877508-38877508_G_T   | 3026S>I | Substitution | Nonsynonymous coding | 28% |
| MM04T | DNAH8   | dynein, axonemal, heavy chain 8              | CCDS4838.1  | chr6_38879251-38879251_C_T   | 3033R>X | Substitution | Nonsense             | 26% |
| MM04T | DNAH9   | dynein, axonemal, heavy chain 9              | CCDS11160.1 | chr17_11687740-11687740_C_T  | 2649P>S | Substitution | Nonsynonymous coding | 26% |
| MM04T | DNAH9   | dynein, axonemal, heavy chain 9              | CCDS11160.1 | chr17_11696826-11696826_C_A  | 2690L>I | Substitution | Nonsynonymous coding | 20% |
| MM04T | DNAH9   | dynein, axonemal, heavy chain 9              | CCDS11160.1 | chr17_11738106-11738106_C_T  | 3133A>V | Substitution | Nonsynonymous coding | 41% |
| MM04T | DNAH9   | dynein, axonemal, heavy chain 9              | CCDS11160.1 | chr17_11784534-11784534_A_C  | 3537K>T | Substitution | Nonsynonymous coding | 24% |
| MM04T | DNAH9   | dynein, axonemal, heavy chain 9              | CCDS11160.1 | chr17_11775107-11775107_C_T  | NA      | Substitution | Splice site donor    | 21% |
| MM04T | DNAH9   | dynein, axonemal, heavy chain 9              | CCDS11160.1 | chr17_11797742-11797742_C_T  | 3779R>X | Substitution | Nonsense             | 22% |
| MM04T | DNAI2   | dynein, axonemal, intermediate chain 2       | CCDS11697.1 | chr17_72306270-72306270_C_A  | 488L>I  | Substitution | Nonsynonymous coding | 13% |
| MM04T | DNAJA4  | Dnaj (Hsp40) homolog, subfamily A, member 4  | CCDS10299.2 | chr15_78562875-78562875_G_T  | 86D>Y   | Substitution | Nonsynonymous coding | 18% |
| MM04T | DNAJB12 | Dnaj (Hsp40) homolog, subfamily B, member 12 | CCDS7316.2  | chr10_74104738-74104738_T_C  | 128Y>C  | Substitution | Nonsynonymous coding | 41% |
| MM04T | DNAJB4  | Dnaj (Hsp40) homolog, subfamily B, member 4  | CCDS684.1   | chr1_78479031-78479031_G_T   | 170E>X  | Substitution | Nonsense             | 19% |
| MM04T | DNAJB8  | Dnaj (Hsp40) homolog, subfamily B, member 8  | CCDS3048.1  | chr3_128181439-128181439_G_A | 217S>L  | Substitution | Nonsynonymous coding | 18% |

|       |          |                                                              |                 |                              |         |              |                      |     |
|-------|----------|--------------------------------------------------------------|-----------------|------------------------------|---------|--------------|----------------------|-----|
| MM04T | DNAJB9   | DnaJ (Hsp40) homolog, subfamily B, member 9                  | CCDS5752.1      | chr7_108213709-108213709_G_T | 195R>I  | Substitution | Nonsynonymous coding | 26% |
| MM04T | DNAJC10  | DnaJ (Hsp40) homolog, subfamily C, member 10                 | CCDS33345.1     | chr2_183593338-183593338_A_C | 152N>H  | Substitution | Nonsynonymous coding | 20% |
| MM04T | DNAJC10  | DnaJ (Hsp40) homolog, subfamily C, member 10                 | CCDS33345.1     | chr2_183594624-183594624_T_G | 228F>C  | Substitution | Nonsynonymous coding | 21% |
| MM04T | DNAJC11  | DnaJ (Hsp40) homolog, subfamily C, member 11                 | CCDS87.1        | chr1_6712998-6712998_G_A     | 174A>V  | Substitution | Nonsynonymous coding | 32% |
| MM04T | DNAJC13  | DnaJ (Hsp40) homolog, subfamily C, member 13                 | CCDS33857.1     | chr3_132192037-132192037_A_C | 753K>Q  | Substitution | Nonsynonymous coding | 37% |
| MM04T | DNAJC18  | DnaJ (Hsp40) homolog, subfamily C, member 18                 | CCDS4214.1      | chr5_138760749-138760749_C_T | 205R>Q  | Substitution | Nonsynonymous coding | 32% |
| MM04T | DNAJC2   | DnaJ (Hsp40) homolog, subfamily C, member 2                  | CCDS43628.1     | chr7_102964064-102964064_C_G | 234E>Q  | Substitution | Nonsynonymous coding | 14% |
| MM04T | DNAJC22  | DnaJ (Hsp40) homolog, subfamily C, member 22                 | CCDS8785.1      | chr12_49743127-49743127_G_A  | 158A>T  | Substitution | Nonsynonymous coding | 33% |
| MM04T | DNAJC5G  | DnaJ (Hsp40) homolog, subfamily C, member 5 gamma            | CCDS1744.1      | chr2_27499611-27499611_G_T   | 5K>N    | Substitution | Nonsynonymous coding | 18% |
| MM04T | DNAJC8   | DnaJ (Hsp40) homolog, subfamily C, member 8                  | CCDS41292.1     | chr1_28534914-28534914_C_T   | 137R>Q  | Substitution | Nonsynonymous coding | 24% |
| MM04T | DNASE1   | deoxyribonuclease I                                          | CCDS10507.1     | chr16_3707296-3707296_G_A    | 220D>N  | Substitution | Nonsynonymous coding | 13% |
| MM04T | DNASE1L3 | deoxyribonuclease I-like 3                                   | CCDS2886.1      | chr3_58190501-58190501_T_C   | 143H>R  | Substitution | Nonsynonymous coding | 26% |
| MM04T | DNASE2   | deoxyribonuclease II, lysosomal                              | CCDS12284.1     | chr19_12986861-12986861_C_A  | 342K>N  | Substitution | Nonsynonymous coding | 29% |
| MM04T | DNER     | delta/notch-like EGF repeat containing                       | CCDS33390.1     | chr2_230223321-230223321_C_T | 717A>T  | Substitution | Nonsynonymous coding | 23% |
| MM04T | DNER     | delta/notch-like EGF repeat containing                       | CCDS33390.1     | chr2_230253085-230253085_T_G | 584E>A  | Substitution | Nonsynonymous coding | 13% |
| MM04T | DNER     | delta/notch-like EGF repeat containing                       | CCDS33390.1     | chr2_230578964-230578964_C_A | 59C>F   | Substitution | Nonsynonymous coding | 45% |
| MM04T | DNHD1    | dynein heavy chain domain 1                                  | CCDS44532.1     | chr11_6588185-6588185_C_A    | 3816L>M | Substitution | Nonsynonymous coding | 19% |
| MM04T | DNHD1    | dynein heavy chain domain 1                                  | CCDS44532.1     | chr11_6524151-6524151_C_A    | 305Y>X  | Substitution | Nonsense             | 23% |
| MM04T | DNM3     | dynamitin 3                                                  | CCDS44276.1     | chr1_172348279-172348279_G_A | 668R>Q  | Substitution | Nonsynonymous coding | 24% |
| MM04T | DNMT3B   | DNA (cytosine-5-)-methyltransferase 3 beta                   | CCDS13205.1     | chr20_31394052-31394052_C_T  | 780S>L  | Substitution | Nonsynonymous coding | 22% |
| MM04T | DNMT3L   | DNA (cytosine-5-)-methyltransferase 3-like                   | CCDS13705.1     | chr21_45679355-45679355_C_A  | 103E>D  | Substitution | Nonsynonymous coding | 29% |
| MM04T | DNTTIP2  | deoxynucleotidyltransferase, terminal, interacting protein 2 | CCDS44174.1     | chr1_94342158-94342158_G_T   | 445L>I  | Substitution | Nonsynonymous coding | 29% |
| MM04T | DNTTIP2  | deoxynucleotidyltransferase, terminal, interacting protein 2 | CCDS44174.1     | chr1_94342770-94342770_T_C   | 241T>A  | Substitution | Nonsynonymous coding | 24% |
| MM04T | DOCK10   | dedicator of cytokinesis 10                                  | ENST00000373702 | chr2_225633635-225633635_G_T | 981F>L  | Substitution | Nonsynonymous coding | 25% |
| MM04T | DOCK11   | dedicator of cytokinesis 11                                  | CCDS35373.1     | chrX_117722207-117722207_C_A | 635P>T  | Substitution | Nonsynonymous coding | 55% |
| MM04T | DOCK11   | dedicator of cytokinesis 11                                  | CCDS35373.1     | chrX_117742044-117742044_A_C | 897L>F  | Substitution | Nonsynonymous coding | 27% |
| MM04T | DOCK11   | dedicator of cytokinesis 11                                  | CCDS35373.1     | chrX_117742076-117742076_T_C | 908L>S  | Substitution | Nonsynonymous coding | 22% |
| MM04T | DOCK11   | dedicator of cytokinesis 11                                  | CCDS35373.1     | chrX_11775194-11775194_C_A   | 1396L>I | Substitution | Nonsynonymous coding | 25% |
| MM04T | DOCK11   | dedicator of cytokinesis 11                                  | CCDS35373.1     | chrX_117677471-117677471_C_A | NA      | Substitution | Splice site acceptor | 27% |
| MM04T | DOCK11   | dedicator of cytokinesis 11                                  | CCDS35373.1     | chrX_117742034-117742034_G_A | NA      | Substitution | Splice site acceptor | 32% |
| MM04T | DOCK11   | dedicator of cytokinesis 11                                  | CCDS35373.1     | chrX_117722186-117722186_G_T | 628E>X  | Substitution | Nonsense             | 56% |
| MM04T | DOCK2    | dedicator of cytokinesis 2                                   | CCDS4371.1      | chr5_169098086-169098086_A_G | 77T>A   | Substitution | Nonsynonymous coding | 22% |

|       |        |                                                                         |             |                              |         |              |                      |     |
|-------|--------|-------------------------------------------------------------------------|-------------|------------------------------|---------|--------------|----------------------|-----|
| MM04T | DOCK2  | dedicator of cytokinesis 2                                              | CCDS4371.1  | chr5_169139142-169139142_A_T | 525K>M  | Substitution | Nonsynonymous coding | 14% |
| MM04T | DOCK2  | dedicator of cytokinesis 2                                              | CCDS4371.1  | chr5_169145766-169145766_C_A | 746F>L  | Substitution | Nonsynonymous coding | 39% |
| MM04T | DOCK2  | dedicator of cytokinesis 2                                              | CCDS4371.1  | chr5_169446020-169446020_C_T | 1097L>F | Substitution | Nonsynonymous coding | 13% |
| MM04T | DOCK2  | dedicator of cytokinesis 2                                              | CCDS4371.1  | chr5_169506107-169506107_T_C | 1708V>A | Substitution | Nonsynonymous coding | 22% |
| MM04T | DOCK3  | dedicator of cytokinesis 3                                              | CCDS46835.1 | chr3_51352455-51352455_C_A   | 1100L>M | Substitution | Nonsynonymous coding | 22% |
| MM04T | DOCK4  | dedicator of cytokinesis 4                                              | CCDS47688.1 | chr7_111512549-111512549_C_A | 606E>X  | Substitution | Nonsense             | 21% |
| MM04T | DOCK5  | dedicator of cytokinesis 5                                              | CCDS6047.1  | chr8_25200015-25200015_G_A   | 870R>Q  | Substitution | Nonsynonymous coding | 22% |
| MM04T | DOCK7  | dedicator of cytokinesis 7                                              | CCDS30734.1 | chr1_63100552-63100552_C_A   | 309M>I  | Substitution | Nonsynonymous coding | 35% |
| MM04T | DOCK7  | dedicator of cytokinesis 7                                              | CCDS30734.1 | chr1_63114085-63114085_C_A   | NA      | Substitution | Splice site donor    | 24% |
| MM04T | DONSON | downstream neighbor of SON                                              | CCDS13632.1 | chr21_34959898-34959898_G_T  | 111S>Y  | Substitution | Nonsynonymous coding | 21% |
| MM04T | DONSON | downstream neighbor of SON                                              | CCDS13632.1 | chr21_34955824-34955824_G_A  | 312R>X  | Substitution | Nonsense             | 22% |
| MM04T | DONSON | downstream neighbor of SON                                              | CCDS13632.1 | chr21_34956908-34956908_A_C  | 258L>X  | Substitution | Nonsense             | 35% |
| MM04T | DOPEY1 | dopey family member 1                                                   | CCDS4996.1  | chr6_83847733-83847733_C_A   | 1324F>L | Substitution | Nonsynonymous coding | 26% |
| MM04T | DOPEY2 | dopey family member 2                                                   | CCDS13643.1 | chr21_37583920-37583920_C_A  | 251L>M  | Substitution | Nonsynonymous coding | 30% |
| MM04T | DPF2   | D4, zinc and double PHD fingers family 2                                | CCDS8100.1  | chr11_65113468-65113468_G_T  | 281K>N  | Substitution | Nonsynonymous coding | 24% |
| MM04T | DPM1   | dolichyl-phosphate mannosyltransferase polypeptide 1, catalytic subunit | CCDS13434.1 | chr20_49562280-49562280_A_C  | 131F>C  | Substitution | Nonsynonymous coding | 50% |
| MM04T | DPP4   | dipeptidyl-peptidase 4                                                  | CCDS2216.1  | chr2_162903957-162903957_T_G | 50K>T   | Substitution | Nonsynonymous coding | 36% |
| MM04T | DPP6   | dipeptidyl-peptidase 6                                                  | NM_130797   | chr7_154593145-154593145_C_A | 460F>L  | Substitution | Nonsynonymous coding | 13% |
| MM04T | DPP8   | dipeptidyl-peptidase 8                                                  | CCDS10207.1 | chr15_65782575-65782575_C_A  | 276E>X  | Substitution | Nonsense             | 27% |
| MM04T | DPPA3  | developmental pluripotency associated 3                                 | CCDS8582.1  | chr12_7864242-7864242_G_A    | 26D>N   | Substitution | Nonsynonymous coding | 29% |
| MM04T | DPPA3  | developmental pluripotency associated 3                                 | CCDS8582.1  | chr12_7864224-7864224_G_T    | 20E>X   | Substitution | Nonsense             | 24% |
| MM04T | DPPA5  | developmental pluripotency associated 5                                 | CCDS34483.1 | chr6_74063933-74063933_C_T   | 6A>T    | Substitution | Nonsynonymous coding | 18% |
| MM04T | DPYD   | dihydropyrimidine dehydrogenase                                         | CCDS30777.1 | chr1_98206012-98206012_G_A   | 86P>L   | Substitution | Nonsynonymous coding | 19% |
| MM04T | DPYS   | dihydropyrimidinase                                                     | CCDS6302.1  | chr8_105440236-105440236_C_A | 355R>L  | Substitution | Nonsynonymous coding | 28% |
| MM04T | DPYSL2 | dihydropyrimidinase-like 2                                              | CCDS6051.1  | chr8_26510911-26510911_C_A   | 542S>Y  | Substitution | Nonsynonymous coding | 37% |
| MM04T | DQX1   | DEAQ box RNA-dependent ATPase 1                                         | CCDS1949.2  | chr2_74749735-74749735_C_A   | 489E>D  | Substitution | Nonsynonymous coding | 22% |
| MM04T | DRAM2  | DNA-damage regulated autophagy modulator 2                              | CCDS30801.1 | chr1_111660790-111660790_C_A | 265D>Y  | Substitution | Nonsynonymous coding | 25% |
| MM04T | DRD1   | dopamine receptor D1                                                    | CCDS4393.1  | chr5_174869018-174869018_C_T | 362S>N  | Substitution | Nonsynonymous coding | 35% |
| MM04T | DRD3   | dopamine receptor D3                                                    | CCDS2978.1  | chr3_113890695-113890695_G_T | 49L>M   | Substitution | Nonsynonymous coding | 20% |
| MM04T | DROSHA | drosha, ribonuclease type III                                           | CCDS47195.1 | chr5_31521284-31521284_C_T   | 298R>Q  | Substitution | Nonsynonymous coding | 26% |
| MM04T | DRP2   | dystrophin related protein 2                                            | CCDS14480.2 | chrX_100515124-100515124_G_T | 905E>D  | Substitution | Nonsynonymous coding | 24% |
| MM04T | DSC2   | desmocollin 2                                                           | CCDS11892.1 | chr18_28667671-28667671_C_T  | 246E>K  | Substitution | Nonsynonymous coding | 29% |

|       |         |                                                                       |             |                               |         |              |                      |     |
|-------|---------|-----------------------------------------------------------------------|-------------|-------------------------------|---------|--------------|----------------------|-----|
| MM04T | DSC2    | desmocollin 2                                                         | CCDS11892.1 | chr18_28669484-28669484_C_T   | 183R>Q  | Substitution | Nonsynonymous coding | 34% |
| MM04T | DSCAML1 | Down syndrome cell adhesion molecule like 1                           | CCDS8384.1  | chr11_117299124-117299124_G_T | 2088L>I | Substitution | Nonsynonymous coding | 15% |
| MM04T | DSCR3   | Down syndrome critical region gene 3                                  | NM_006052   | chr21_38612816-38612816_G_A   | 61A>V   | Substitution | Nonsynonymous coding | 30% |
| MM04T | DSCR3   | Down syndrome critical region gene 3                                  | NM_006052   | chr21_38600647-38600647_G_A   | 179R>X  | Substitution | Nonsense             | 29% |
| MM04T | DSEL    | dermatan sulfate epimerase-like                                       | CCDS11995.1 | chr18_65178353-65178353_G_T   | 1175L>I | Substitution | Nonsynonymous coding | 36% |
| MM04T | DSEL    | dermatan sulfate epimerase-like                                       | CCDS11995.1 | chr18_65178850-65178850_C_T   | 1009R>H | Substitution | Nonsynonymous coding | 32% |
| MM04T | DSEL    | dermatan sulfate epimerase-like                                       | CCDS11995.1 | chr18_65179450-65179450_T_G   | 809K>T  | Substitution | Nonsynonymous coding | 23% |
| MM04T | DSG1    | desmoglein 1                                                          | CCDS11896.1 | chr18_28925982-28925982_G_T   | 641E>X  | Substitution | Nonsense             | 38% |
| MM04T | DSP     | desmoplakin                                                           | CCDS4501.1  | chr6_7572198-7572198_G_A      | 676R>H  | Substitution | Nonsynonymous coding | 33% |
| MM04T | DSP     | desmoplakin                                                           | CCDS4501.1  | chr6_7576571-7576571_G_A      | 892R>H  | Substitution | Nonsynonymous coding | 29% |
| MM04T | DSPP    | dentin sialophosphoprotein                                            | CCDS43248.1 | chr4_88533723-88533723_G_T    | 129E>X  | Substitution | Nonsense             | 30% |
| MM04T | DST     | dystonin                                                              | CCDS4959.1  | chr6_56480862-56480862_C_A    | 2468R>I | Substitution | Nonsynonymous coding | 22% |
| MM04T | DST     | dystonin                                                              | CCDS4959.1  | chr6_56480536-56480536_C_A    | 2577E>X | Substitution | Nonsense             | 23% |
| MM04T | DST     | dystonin                                                              | CCDS4959.1  | chr6_56483026-56483026_C_A    | 1936E>X | Substitution | Nonsense             | 37% |
| MM04T | DST     | dystonin                                                              | CCDS4959.1  | chr6_56484238-56484238_C_A    | 1532E>X | Substitution | Nonsense             | 36% |
| MM04T | DSTYK   | dual serine/threonine and tyrosine protein kinase                     | CCDS1451.1  | chr1_205132972-205132972_T_G  | 479K>T  | Substitution | Nonsynonymous coding | 33% |
| MM04T | DUOX2   | dual oxidase 2                                                        | CCDS10117.1 | chr15_45389545-45389545_G_T   | 1246F>L | Substitution | Nonsynonymous coding | 10% |
| MM04T | DUOX2   | dual oxidase 2                                                        | CCDS10117.1 | chr15_45402880-45402880_C_T   | 304S>N  | Substitution | Nonsynonymous coding | 58% |
| MM04T | DUPD1   | dual specificity phosphatase and pro isomerase domain containing 1    | CCDS31223.1 | chr10_76797720-76797720_C_A   | 179K>N  | Substitution | Nonsynonymous coding | 39% |
| MM04T | DUPD1   | dual specificity phosphatase and pro isomerase domain containing 1    | CCDS31223.1 | chr10_76818260-76818260_C_T   | 5E>K    | Substitution | Nonsynonymous coding | 30% |
| MM04T | DUS2L   | dihydrouridine synthase 2-like, SMM1 homolog ( <i>S. cerevisiae</i> ) | CCDS10859.1 | chr16_68112404-68112404_G_T   | 409K>N  | Substitution | Nonsynonymous coding | 21% |
| MM04T | DUS4L   | dihydrouridine synthase 4-like ( <i>S. cerevisiae</i> )               | CCDS5745.1  | chr7_107216848-107216848_C_T  | 173Q>X  | Substitution | Nonsense             | 37% |
| MM04T | DUSP10  | dual specificity phosphatase 10                                       | CCDS1528.1  | chr1_221879709-221879709_G_A  | 304S>L  | Substitution | Nonsynonymous coding | 30% |
| MM04T | DUSP13  | dual specificity phosphatase 13                                       | CCDS31225.1 | chr10_76855454-76855454_G_T   | 184F>L  | Substitution | Nonsynonymous coding | 31% |
| MM04T | DUSP13  | dual specificity phosphatase 13                                       | CCDS31225.1 | chr10_76857554-76857554_G_A   | 123S>L  | Substitution | Nonsynonymous coding | 37% |
| MM04T | DUSP16  | dual specificity phosphatase 16                                       | CCDS8650.1  | chr12_12630251-12630251_C_A   | 505R>L  | Substitution | Nonsynonymous coding | 29% |
| MM04T | DUSP27  | dual specificity phosphatase 27 (putative)                            | CCDS30932.1 | chr1_167096554-167096554_A_G  | 729N>S  | Substitution | Nonsynonymous coding | 30% |
| MM04T | DUSP4   | dual specificity phosphatase 4                                        | CCDS6072.1  | chr8_29194791-29194791_G_A    | 313R>C  | Substitution | Nonsynonymous coding | 25% |
| MM04T | DUXA    | double homeobox A                                                     | CCDS33126.1 | chr19_57665787-57665787_G_A   | 203T>M  | Substitution | Nonsynonymous coding | 16% |
| MM04T | DYM     | dymeclin                                                              | CCDS11937.1 | chr18_46904958-46904958_C_A   | 134E>X  | Substitution | Nonsense             | 29% |
| MM04T | DYNC1I1 | dynein, cytoplasmic 1, intermediate chain 1                           | CCDS5644.1  | chr7_95442621-95442621_G_T    | 113D>Y  | Substitution | Nonsynonymous coding | 22% |
| MM04T | DYNC1L1 | dynein, cytoplasmic 1, light intermediate chain 1                     | CCDS2654.1  | chr3_32586454-32586454_G_T    | 161S>Y  | Substitution | Nonsynonymous coding | 21% |

|       |         |                                                                     |                 |                               |         |              |                      |     |
|-------|---------|---------------------------------------------------------------------|-----------------|-------------------------------|---------|--------------|----------------------|-----|
| MM04T | DYNC1L1 | dynein, cytoplasmic 1, light intermediate chain 1                   | CCDS2654.1      | chr3_32582681-32582681_C_A    | 196E>X  | Substitution | Nonsense             | 22% |
| MM04T | DYNC2H1 | dynein, cytoplasmic 2, heavy chain 1                                | CCDS44717.1     | chr11_102993557-102993557_G_T | 497D>Y  | Substitution | Nonsynonymous coding | 20% |
| MM04T | DYNC2H1 | dynein, cytoplasmic 2, heavy chain 1                                | CCDS44717.1     | chr11_103080663-103080663_G_A | 2838R>Q | Substitution | Nonsynonymous coding | 40% |
| MM04T | DYRK1A  | dual-specificity tyrosine-(Y)-phosphorylation regulated kinase 1A   | CCDS42925.1     | chr21_38853118-38853118_C_T   | 169S>F  | Substitution | Nonsynonymous coding | 40% |
| MM04T | DYRK1A  | dual-specificity tyrosine-(Y)-phosphorylation regulated kinase 1A   | CCDS42925.1     | chr21_38877895-38877895_C_A   | NA      | Substitution | Splice site donor    | 24% |
| MM04T | DYRK1B  | dual-specificity tyrosine-(Y)-phosphorylation regulated kinase 1B   | CCDS12543.1     | chr19_40318200-40318200_T_A   | 302I>F  | Substitution | Nonsynonymous coding | 34% |
| MM04T | DYRK4   | dual-specificity tyrosine-(Y)-phosphorylation regulated kinase 4    | CCDS8530.1      | chr12_4705862-4705862_G_A     | 176R>H  | Substitution | Nonsynonymous coding | 28% |
| MM04T | DYRK4   | dual-specificity tyrosine-(Y)-phosphorylation regulated kinase 4    | CCDS8530.1      | chr12_4708255-4708255_C_T     | 208R>W  | Substitution | Nonsynonymous coding | 31% |
| MM04T | DYSF    | dysferlin, limb girdle muscular dystrophy 2B (autosomal recessive)  | CCDS46328.1     | chr2_71909722-71909722_G_T    | 2079W>L | Substitution | Nonsynonymous coding | 20% |
| MM04T | DYTN    | dystrotelin                                                         | CCDS46502.1     | chr2_207569605-207569605_G_A  | 149R>X  | Substitution | Nonsense             | 32% |
| MM04T | DZIP1   | DAZ interacting protein 1                                           | CCDS9478.1      | chr13_96242593-96242593_G_A   | 595R>X  | Substitution | Nonsense             | 39% |
| MM04T | DZIP1   | DAZ interacting protein 1                                           | CCDS9478.1      | chr13_96242617-96242617_C_A   | 587E>X  | Substitution | Nonsense             | 39% |
| MM04T | DZIP1L  | DAZ interacting protein 1-like                                      | CCDS3096.1      | chr3_137807294-137807294_C_T  | 309R>Q  | Substitution | Nonsynonymous coding | 28% |
| MM04T | E4F1    | E4F transcription factor 1                                          | CCDS32370.1     | chr16_2283486-2283486_G_T     | 368E>D  | Substitution | Nonsynonymous coding | 11% |
| MM04T | EBF2    | early B-cell factor 2                                               | CCDS43726.1     | chr8_25745438-25745438_C_A    | 268G>X  | Substitution | Nonsense             | 33% |
| MM04T | EBPL    | emopamil binding protein-like                                       | CCDS9420.1      | chr13_50235209-50235209__A    | NA      | Insertion    | Frameshift           | 17% |
| MM04T | ECM2    | extracellular matrix protein 2, female organ and adipocyte specific | CCDS6698.1      | chr9_95285079-95285079_C_A    | 24E>X   | Substitution | Nonsense             | 27% |
| MM04T | ECT2    | epithelial cell transforming sequence 2 oncogene                    | CCDS3220.1      | chr3_172473141-172473141_G_T  | 63E>X   | Substitution | Nonsense             | 25% |
| MM04T | ECT2    | epithelial cell transforming sequence 2 oncogene                    | ENST00000392692 | chr3_172473312-172473312_G_T  | 84E>X   | Substitution | Nonsense             | 37% |
| MM04T | EDA     | ectodysplasin A                                                     | CCDS14394.1     | chrX_69176981-69176981_T_G    | 167D>E  | Substitution | Nonsynonymous coding | 27% |
| MM04T | EDA     | ectodysplasin A                                                     | CCDS14394.1     | chrX_69253280-69253280_C_T    | 276R>C  | Substitution | Nonsynonymous coding | 32% |
| MM04T | EDARADD | EDAR-associated death domain                                        | CCDS31065.1     | chr1_236558934-236558934_C_A  | 2A>D    | Substitution | Nonsynonymous coding | 11% |
| MM04T | EDEM1   | ER degradation enhancer, mannosidase alpha-like 1                   | CCDS33686.1     | chr3_5249893-5249893_T_C      | 485V>A  | Substitution | Nonsynonymous coding | 34% |
| MM04T | EDNRB   | endothelin receptor type B                                          | CCDS9461.1      | chr13_78477652-78477652_G_T   | 192L>I  | Substitution | Nonsynonymous coding | 12% |
| MM04T | EEF1A2  | eukaryotic translation elongation factor 1 alpha 2                  | CCDS13522.1     | chr20_62121873-62121873_T_C   | 330K>E  | Substitution | Nonsynonymous coding | 19% |
| MM04T | EEF1A2  | eukaryotic translation elongation factor 1 alpha 2                  | CCDS13522.1     | chr20_62121947-62121947_C_T   | 305G>D  | Substitution | Nonsynonymous coding | 28% |
| MM04T | EFCAB13 | EF-hand calcium binding domain 13                                   | CCDS11512.1     | chr17_45507328-45507328_G_T   | NA      | Substitution | Splice site donor    | 43% |
| MM04T | EFCAB3  | EF-hand calcium binding domain 3                                    | CCDS45751.1     | chr17_60484531-60484531_C_A   | 327F>L  | Substitution | Nonsynonymous coding | 33% |
| MM04T | EFCAB4B | EF-hand calcium binding domain 4B                                   | CCDS44803.1     | chr12_3763456-3763456_G_A     | 323S>F  | Substitution | Nonsynonymous coding | 22% |
| MM04T | EFCAB5  | EF-hand calcium binding domain 5                                    | NM_198529       | chr17_28361271-28361271_C_A   | 356D>E  | Substitution | Nonsynonymous coding | 31% |
| MM04T | EFCAB5  | EF-hand calcium binding domain 5                                    | NM_198529       | chr17_28434854-28434854_C_A   | 1442H>N | Substitution | Nonsynonymous coding | 33% |
| MM04T | EFCAB6  | EF-hand calcium binding domain 6                                    | CCDS14049.1     | chr22_43950904-43950904_C_A   | 1165D>Y | Substitution | Nonsynonymous coding | 20% |

|       |        |                                                                            |                 |                               |        |              |                      |     |
|-------|--------|----------------------------------------------------------------------------|-----------------|-------------------------------|--------|--------------|----------------------|-----|
| MM04T | EFCAB6 | EF-hand calcium binding domain 6                                           | CCDS14049.1     | chr22_44068007-44068007_C_A   | 496E>X | Substitution | Nonsense             | 24% |
| MM04T | EFCAB9 | EF-hand calcium binding domain 9                                           | ENST00000398186 | chr5_171621276-171621276_C_A  | 34H>N  | Substitution | Nonsynonymous coding | 32% |
| MM04T | EFCAB9 | EF-hand calcium binding domain 9                                           | ENST00000398186 | chr5_171627714-171627714_C_A  | 144L>I | Substitution | Nonsynonymous coding | 27% |
| MM04T | EFHB   | EF-hand domain family, member B                                            | CCDS33715.2     | chr3_19975021-19975021_C_T    | 164V>I | Substitution | Nonsynonymous coding | 18% |
| MM04T | EFHC1  | EF-hand domain (C-terminal) containing 1                                   | CCDS4942.1      | chr6_52355035-52355035_C_T    | 580R>C | Substitution | Nonsynonymous coding | 22% |
| MM04T | EFHC2  | EF-hand domain (C-terminal) containing 2                                   | NM_025184       | chrX_44091783-44091783_G_A    | 522R>C | Substitution | Nonsynonymous coding | 25% |
| MM04T | EFHC2  | EF-hand domain (C-terminal) containing 2                                   | NM_025184       | chrX_44120532-44120532_C_A    | 132R>L | Substitution | Nonsynonymous coding | 30% |
| MM04T | EFNB2  | ephrin-B2                                                                  | CCDS9507.1      | chr13_107164957-107164957_T_G | 109K>T | Substitution | Nonsynonymous coding | 22% |
| MM04T | EFTUD2 | elongation factor Tu GTP binding domain containing 2                       | CCDS11489.1     | chr17_42962672-42962672_T_G   | 101K>T | Substitution | Nonsynonymous coding | 27% |
| MM04T | EGF    | epidermal growth factor                                                    | CCDS3689.1      | chr4_110865165-110865165_C_A  | 226S>Y | Substitution | Nonsynonymous coding | 31% |
| MM04T | EGFLAM | EGF-like, fibronectin type III and laminin G domains                       | CCDS3924.1      | chr5_38407932-38407932_C_A    | 391F>L | Substitution | Nonsynonymous coding | 40% |
| MM04T | EGFR   | epidermal growth factor receptor                                           | CCDS5514.1      | chr7_55269478-55269478_A_G    | NA     | Substitution | Splice site donor    | 25% |
| MM04T | EGLN3  | egl nine homolog 3 (C. elegans)                                            | CCDS9646.1      | chr14_34396185-34396185_C_A   | 223K>N | Substitution | Nonsynonymous coding | 35% |
| MM04T | EGR1   | early growth response 1                                                    | CCDS4206.1      | chr5_137803327-137803327_G_A  | 397A>T | Substitution | Nonsynonymous coding | 35% |
| MM04T | EGR2   | early growth response 2                                                    | CCDS7267.1      | chr10_64573428-64573428_G_A   | 324R>C | Substitution | Nonsynonymous coding | 21% |
| MM04T | EGR4   | early growth response 4                                                    | NM_001965       | chr2_73520425-73520425_A_C    | 110F>L | Substitution | Nonsynonymous coding | 21% |
| MM04T | EHBP1  | EH domain binding protein 1                                                | CCDS1872.1      | chr2_63175921-63175921_T_C    | 682V>A | Substitution | Nonsynonymous coding | 33% |
| MM04T | EHD3   | EH-domain containing 3                                                     | CCDS1774.1      | chr2_31483473-31483473_C_A    | 200F>L | Substitution | Nonsynonymous coding | 22% |
| MM04T | EIF1B  | eukaryotic translation initiation factor 1B                                | CCDS2690.1      | chr3_40352441-40352441_A_G    | 30Y>C  | Substitution | Nonsynonymous coding | 41% |
| MM04T | EIF2B4 | eukaryotic translation initiation factor 2B, subunit 4 delta, 67kDa        | ENST00000417567 | chr2_27590108-27590108_C_A    | 172K>N | Substitution | Nonsynonymous coding | 23% |
| MM04T | EIF2C2 | eukaryotic translation initiation factor 2C, 2                             | NM_012154       | chr8_141569503-141569503_C_A  | 261E>X | Substitution | Nonsense             | 33% |
| MM04T | EIF2S2 | eukaryotic translation initiation factor 2, subunit 2 beta, 38kDa          | CCDS13231.1     | chr20_32684601-32684601_C_T   | 182R>Q | Substitution | Nonsynonymous coding | 24% |
| MM04T | EIF3B  | eukaryotic translation initiation factor 3, subunit B                      | CCDS5332.1      | chr7_2409115-2409115_C_T      | 471S>F | Substitution | Nonsynonymous coding | 20% |
| MM04T | EIF3H  | eukaryotic translation initiation factor 3, subunit H                      | CCDS6319.1      | chr8_117738321-117738321_G_A  | 75R>W  | Substitution | Nonsynonymous coding | 21% |
| MM04T | EIF3I  | eukaryotic translation initiation factor 3, subunit I                      | CCDS357.1       | chr1_32696777-32696777_G_A    | 320E>K | Substitution | Nonsynonymous coding | 32% |
| MM04T | EIF4B  | eukaryotic translation initiation factor 4B                                | CCDS41788.1     | chr12_53413718-53413718_G_A   | 129E>K | Substitution | Nonsynonymous coding | 36% |
| MM04T | EIF4B  | eukaryotic translation initiation factor 4B                                | CCDS41788.1     | chr12_53413791-53413791_C_T   | 153A>V | Substitution | Nonsynonymous coding | 38% |
| MM04T | EIF4G1 | eukaryotic translation initiation factor 4 gamma, 1                        | CCDS3259.1      | chr3_184041233-184041233_G_A  | 709R>Q | Substitution | Nonsynonymous coding | 21% |
| MM04T | EIF4G2 | eukaryotic translation initiation factor 4 gamma, 2                        | ENST00000429377 | chr11_10821304-10821304_C_A   | NA     | Substitution | Splice site acceptor | 27% |
| MM04T | ELAC1  | elaC homolog 1 (E. coli)                                                   | CCDS11949.1     | chr18_48510794-48510794_A_C   | 162E>D | Substitution | Nonsynonymous coding | 25% |
| MM04T | ELAC2  | elaC homolog 2 (E. coli)                                                   | CCDS11164.1     | chr17_12901819-12901819_C_A   | 477R>I | Substitution | Nonsynonymous coding | 34% |
| MM04T | ELAVL3 | ELAV (embryonic lethal, abnormal vision, Drosophila)-like 3 (Hu antigen C) | CCDS32912.1     | chr19_11577045-11577045_T_C   | 92D>G  | Substitution | Nonsynonymous coding | 36% |



|       |         |                                                                            |                 |                              |         |              |                      |     |
|-------|---------|----------------------------------------------------------------------------|-----------------|------------------------------|---------|--------------|----------------------|-----|
| MM04T | ELAVL3  | ELAV (embryonic lethal, abnormal vision, Drosophila)-like 3 (Hu antigen C) | CCDS32912.1     | chr19_11577086-11577086_C_A  | 78Q>H   | Substitution | Nonsynonymous coding | 23% |
| MM04T | ELL2    | elongation factor, RNA polymerase II, 2                                    | CCDS4080.1      | chr5_95234462-95234462_C_T   | 336R>Q  | Substitution | Nonsynonymous coding | 20% |
| MM04T | ELL2    | elongation factor, RNA polymerase II, 2                                    | CCDS4080.1      | chr5_95255174-95255174_C_A   | 91D>Y   | Substitution | Nonsynonymous coding | 10% |
| MM04T | ELMO1   | engulfment and cell motility 1                                             | CCDS5449.1      | chr7_37283969-37283969_C_A   | 147M>I  | Substitution | Nonsynonymous coding | 21% |
| MM04T | ELMOD2  | ELMO/CED-12 domain containing 2                                            | CCDS3752.1      | chr4_141471463-141471463_G_T | 272E>D  | Substitution | Nonsynonymous coding | 16% |
| MM04T | ELN     | elastin                                                                    | CCDS5562.2      | chr7_73449737-73449737_T_G   | 42F>L   | Substitution | Nonsynonymous coding | 24% |
| MM04T | ELP3    | elongator acetyltransferase complex subunit 3                              | CCDS6065.1      | chr8_28017878-28017878_G_A   | 464E>K  | Substitution | Nonsynonymous coding | 23% |
| MM04T | ELTD1   | EGF, latrophilin and seven transmembrane domain containing 1               | CCDS41352.1     | chr1_79387308-79387308_C_T   | 416G>D  | Substitution | Nonsynonymous coding | 27% |
| MM04T | ELTD1   | EGF, latrophilin and seven transmembrane domain containing 1               | CCDS41352.1     | chr1_79392656-79392656_G_T   | 333S>Y  | Substitution | Nonsynonymous coding | 23% |
| MM04T | EMC1    | ER membrane protein complex subunit 1                                      | CCDS190.1       | chr1_19557343-19557343_G_A   | 687R>X  | Substitution | Nonsense             | 36% |
| MM04T | EME2    | essential meiotic endonuclease 1 homolog 2 (S. pombe)                      | CCDS32364.1     | chr16_1825081-1825081_G_A    | 173E>K  | Substitution | Nonsynonymous coding | 23% |
| MM04T | EMILIN1 | elastin microfibril interfacier 1                                          | CCDS1733.1      | chr2_27306518-27306518_G_T   | 693Q>H  | Substitution | Nonsynonymous coding | 27% |
| MM04T | EMILIN2 | elastin microfibril interfacier 2                                          | CCDS11828.1     | chr18_2891879-2891879_C_A    | 585S>Y  | Substitution | Nonsynonymous coding | 31% |
| MM04T | EMILIN3 | elastin microfibril interfacier 3                                          | CCDS13316.1     | chr20_39990951-39990951_G_A  | 420L>F  | Substitution | Nonsynonymous coding | 16% |
| MM04T | EML3    | echinoderm microtubule associated protein like 3                           | CCDS8023.2      | chr11_62378456-62378456_C_A  | 154R>I  | Substitution | Nonsynonymous coding | 31% |
| MM04T | EML5    | echinoderm microtubule associated protein like 5                           | CCDS45148.1     | chr14_89109311-89109311_A_G  | 1388V>A | Substitution | Nonsynonymous coding | 27% |
| MM04T | EML5    | echinoderm microtubule associated protein like 5                           | CCDS45148.1     | chr14_89172612-89172612_C_A  | 606A>S  | Substitution | Nonsynonymous coding | 33% |
| MM04T | EML5    | echinoderm microtubule associated protein like 5                           | CCDS45148.1     | chr14_89258735-89258735_T_C  | 38Y>C   | Substitution | Nonsynonymous coding | 24% |
| MM04T | EML6    | echinoderm microtubule associated protein like 6                           | CCDS46286.1     | chr2_55077308-55077308_T_C   | 466L>S  | Substitution | Nonsynonymous coding | 24% |
| MM04T | EML6    | echinoderm microtubule associated protein like 6                           | CCDS46286.1     | chr2_55118278-55118278_C_A   | 842F>L  | Substitution | Nonsynonymous coding | 19% |
| MM04T | EMR2    | egf-like module containing, mucin-like, hormone receptor-like 2            | CCDS32935.1     | chr19_14875264-14875264_G_T  | 355F>L  | Substitution | Nonsynonymous coding | 28% |
| MM04T | EMR3    | egf-like module containing, mucin-like, hormone receptor-like 3            | CCDS12315.1     | chr19_14762001-14762001_G_A  | 198A>V  | Substitution | Nonsynonymous coding | 33% |
| MM04T | EN1     | engrailed homeobox 1                                                       | CCDS2123.1      | chr2_119604341-119604341_C_T | 135G>S  | Substitution | Nonsynonymous coding | 13% |
| MM04T | ENAH    | enabled homolog (Drosophila)                                               | ENST00000284563 | chr1_225705332-225705332_G_A | 407S>L  | Substitution | Nonsynonymous coding | 22% |
| MM04T | ENAM    | enamelin                                                                   | CCDS3544.2      | chr4_71508219-71508219_C_A   | 359P>H  | Substitution | Nonsynonymous coding | 21% |
| MM04T | ENAM    | enamelin                                                                   | CCDS3544.2      | chr4_71509418-71509418_C_A   | 759L>I  | Substitution | Nonsynonymous coding | 23% |
| MM04T | ENC1    | ectodermal-neural cortex 1 (with BTB domain)                               | CCDS4021.1      | chr5_73930802-73930802_G_T   | 503F>L  | Substitution | Nonsynonymous coding | 38% |
| MM04T | ENKUR   | enkurin, TRPC channel interacting protein                                  | CCDS7146.1      | chr10_25284661-25284661_G_A  | 121P>S  | Substitution | Nonsynonymous coding | 26% |
| MM04T | ENO3    | enolase 3 (beta, muscle)                                                   | CCDS11062.1     | chr17_4858481-4858481_G_A    | 186A>T  | Substitution | Nonsynonymous coding | 17% |
| MM04T | ENPEP   | glutamyl aminopeptidase (aminopeptidase A)                                 | CCDS3691.1      | chr4_111441204-111441204_C_A | 517S>Y  | Substitution | Nonsynonymous coding | 22% |
| MM04T | ENPEP   | glutamyl aminopeptidase (aminopeptidase A)                                 | CCDS3691.1      | chr4_111482604-111482604_G_T | 922E>X  | Substitution | Nonsense             | 36% |
| MM04T | ENPP2   | ectonucleotide pyrophosphatase/phosphodiesterase 2                         | CCDS6329.1      | chr8_120596006-120596006_C_A | 550K>N  | Substitution | Nonsynonymous coding | 27% |

|       |                 |                                                       |                 |                              |         |              |                      |     |
|-------|-----------------|-------------------------------------------------------|-----------------|------------------------------|---------|--------------|----------------------|-----|
| MM04T | ENPP2           | ectonucleotide<br>pyrophosphatase/phosphodiesterase 2 | CCDS6329.1      | chr8_120605998-120605998_C_A | 411D>Y  | Substitution | Nonsynonymous coding | 31% |
| MM04T | ENPP3           | ectonucleotide<br>pyrophosphatase/phosphodiesterase 3 | CCDS5148.1      | chr6_132061368-132061368_T_G | 769L>V  | Substitution | Nonsynonymous coding | 22% |
| MM04T | ENPP4           | ectonucleotide<br>pyrophosphatase/phosphodiesterase 4 | CCDS34468.1     | chr6_46107475-46107475_T_G   | 52F>C   | Substitution | Nonsynonymous coding | 45% |
| MM04T | ENSG00000105663 | -                                                     | CCDS46055.1     | chr19_36219939-36219939_T_C  | 1581C>R | Substitution | Nonsynonymous coding | 30% |
| MM04T | ENSG00000141140 | -                                                     | CCDS45654.1     | chr17_34854347-34854347_G_T  | 640F>L  | Substitution | Nonsynonymous coding | 26% |
| MM04T | ENSG00000155319 | -                                                     | ENST00000329373 | chr16_46587925-46587925_T_A  | 222E>D  | Substitution | Nonsynonymous coding | 38% |
| MM04T | ENSG00000167634 | -                                                     | CCDS46183.1     | chr19_55441952-55441952_C_T  | 909D>N  | Substitution | Nonsynonymous coding | 17% |
| MM04T | ENSG00000172901 | -                                                     | CCDS4124.1      | chr5_115336914-115336914_A_C | 600N>H  | Substitution | Nonsynonymous coding | 35% |
| MM04T | ENSG00000172901 | -                                                     | CCDS4124.1      | chr5_115350968-115350968_G_T | 824D>Y  | Substitution | Nonsynonymous coding | 34% |
| MM04T | ENSG00000173517 | -                                                     | CCDS42062.1     | chr15_77471639-77471639_G_T  | 877S>Y  | Substitution | Nonsynonymous coding | 20% |
| MM04T | ENSG00000173517 | -                                                     | CCDS42062.1     | chr15_77473232-77473232_G_T  | 346S>Y  | Substitution | Nonsynonymous coding | 32% |
| MM04T | ENSG00000173517 | -                                                     | CCDS42062.1     | chr15_77473298-77473298_G_A  | 324S>F  | Substitution | Nonsynonymous coding | 19% |
| MM04T | ENSG00000176276 | -                                                     | ENST00000338626 | chr5_75469951-75469951_T_C   | 20T>A   | Substitution | Nonsynonymous coding | 17% |
| MM04T | ENSG00000180923 | -                                                     | ENST00000316540 | chr11_6079337-6079337_G_T    | 57L>I   | Substitution | Nonsynonymous coding | 16% |
| MM04T | ENSG00000180947 | -                                                     | ENST00000316698 | chr11_5922404-5922404_G_T    | 133R>I  | Substitution | Nonsynonymous coding | 24% |
| MM04T | ENSG00000183760 | -                                                     | CCDS33018.1     | chr19_39591613-39591613_C_T  | 278R>W  | Substitution | Nonsynonymous coding | 10% |
| MM04T | ENSG00000186031 | -                                                     | ENST00000414268 | chr15_33445962-33445962_C_T  | 385R>Q  | Substitution | Nonsynonymous coding | 20% |
| MM04T | ENSG00000196763 | -                                                     | ENST00000359554 | chr11_71628623-71628623_C_A  | 129E>D  | Substitution | Nonsynonymous coding | 23% |
| MM04T | ENSG00000196763 | -                                                     | ENST00000359554 | chr11_71634359-71634359_G_T  | 14S>Y   | Substitution | Nonsynonymous coding | 18% |
| MM04T | ENSG00000205141 | -                                                     | ENST00000378906 | chr15_99799696-99799696_C_T  | 265A>V  | Substitution | Nonsynonymous coding | 28% |
| MM04T | ENSG00000205141 | -                                                     | ENST00000378906 | chr15_99799726-99799726_T_C  | 275V>A  | Substitution | Nonsynonymous coding | 25% |
| MM04T | ENSG00000205748 | -                                                     | ENST00000381510 | chr16_17190128-17190128_C_T  | 51R>Q   | Substitution | Nonsynonymous coding | 24% |
| MM04T | ENSG00000214422 | -                                                     | ENST00000398302 | chr15_98417388-98417388_A_G  | 43V>A   | Substitution | Nonsynonymous coding | 18% |
| MM04T | ENSG00000214636 | -                                                     | ENST00000398711 | chr6_52522303-52522303_G_A   | 34A>T   | Substitution | Nonsynonymous coding | 30% |
| MM04T | ENSG00000214877 | -                                                     | ENST00000399160 | chr9_94939981-94939981_G_T   | 237P>T  | Substitution | Nonsynonymous coding | 21% |
| MM04T | ENSG00000215273 | -                                                     | ENST00000399906 | chr4_17875268-17875268_G_T   | 480S>Y  | Substitution | Nonsynonymous coding | 28% |
| MM04T | ENSG00000215273 | -                                                     | ENST00000399906 | chr4_17875248-17875248_C_A   | 487E>X  | Substitution | Nonsense             | 27% |
| MM04T | ENSG00000225576 | -                                                     | ENST00000452141 | chr7_38356761-38356761_C_A   | 75D>Y   | Substitution | Nonsynonymous coding | 25% |
| MM04T | ENSG00000226351 | -                                                     | ENST00000433532 | chr16_73127100-73127100_C_T  | 49R>C   | Substitution | Nonsynonymous coding | 17% |
| MM04T | ENSG00000227699 | -                                                     | ENST00000456709 | chrX_101437347-101437347_G_T | 20K>N   | Substitution | Nonsynonymous coding | 25% |
| MM04T | ENSG00000229070 | -                                                     | ENST00000450721 | chr17_75441393-75441393_G_A  | 102R>H  | Substitution | Nonsynonymous coding | 20% |
| MM04T | ENSG00000230938 | -                                                     | ENST00000413018 | chr9_133057296-133057296_G_T | 222D>Y  | Substitution | Nonsynonymous coding | 41% |

|       |                 |                                                             |                 |                               |         |              |                      |     |
|-------|-----------------|-------------------------------------------------------------|-----------------|-------------------------------|---------|--------------|----------------------|-----|
| MM04T | ENSG00000235766 | -                                                           | ENST00000440128 | chr19_38795444-38795444_G_T   | 26L>M   | Substitution | Nonsynonymous coding | 20% |
| MM04T | ENTPD2          | ectonucleoside triphosphate diphosphohydrolase 2            | CCDS7026.1      | chr9_139945716-139945716_C_A  | 165E>X  | Substitution | Nonsense             | 17% |
| MM04T | ENTPD4          | ectonucleoside triphosphate diphosphohydrolase 4            | CCDS6041.1      | chr8_23294537-23294537_G_T    | 428F>L  | Substitution | Nonsynonymous coding | 31% |
| MM04T | ENTPD7          | ectonucleoside triphosphate diphosphohydrolase 7            | CCDS7480.1      | chr10_101460767-101460767_G_T | 458R>I  | Substitution | Nonsynonymous coding | 17% |
| MM04T | ENY2            | enhancer of yellow 2 homolog (Drosophila)                   | CCDS43762.1     | chr8_110346698-110346698_A_G  | 1M>V    | Substitution | Nonsynonymous coding | 28% |
| MM04T | EP300           | E1A binding protein p300                                    | CCDS14010.1     | chr22_41533773-41533773_G_A   | 580R>Q  | Substitution | Nonsynonymous coding | 30% |
| MM04T | EP400           | E1A binding protein p400                                    | CCDS19129.1     | chr12_132479459-132479459_G_A | 928V>I  | Substitution | Nonsynonymous coding | 24% |
| MM04T | EPAS1           | endothelial PAS domain protein 1                            | CCDS1825.1      | chr2_46583923-46583923_C_T    | 144R>C  | Substitution | Nonsynonymous coding | 28% |
| MM04T | EPB41L1         | erythrocyte membrane protein band 4.1-like 1                | ENST00000344237 | chr20_34794791-34794791_A_G   | 506K>E  | Substitution | Nonsynonymous coding | 25% |
| MM04T | EPB41L2         | erythrocyte membrane protein band 4.1-like 2                | ENST00000257986 | chr6_131197871-131197871_C_A  | 41E>D   | Substitution | Nonsynonymous coding | 25% |
| MM04T | EPB41L3         | erythrocyte membrane protein band 4.1-like 3                | CCDS11838.1     | chr18_5428360-5428360_C_A     | 339K>N  | Substitution | Nonsynonymous coding | 20% |
| MM04T | EPB41L3         | erythrocyte membrane protein band 4.1-like 3                | CCDS11838.1     | chr18_5428385-5428385_C_A     | 331R>I  | Substitution | Nonsynonymous coding | 24% |
| MM04T | EPB41L3         | erythrocyte membrane protein band 4.1-like 3                | CCDS11838.1     | chr18_5443858-5443858_C_A     | 170E>X  | Substitution | Nonsense             | 29% |
| MM04T | EPB41L4B        | erythrocyte membrane protein band 4.1 like 4B               | ENST00000311609 | chr9_112069506-112069506_C_A  | 15R>S   | Substitution | Nonsynonymous coding | 42% |
| MM04T | EPB49           | erythrocyte membrane protein band 4.9 (dematin)             | CCDS6020.1      | chr8_21938878-21938878_G_T    | 374E>D  | Substitution | Nonsynonymous coding | 24% |
| MM04T | EPC1            | enhancer of polycomb homolog 1 (Drosophila)                 | CCDS7172.1      | chr10_32561099-32561099_A_C   | NA      | Substitution | Splice site acceptor | 37% |
| MM04T | EPC2            | enhancer of polycomb homolog 2 (Drosophila)                 | CCDS46422.1     | chr2_149528727-149528727_C_A  | 497F>L  | Substitution | Nonsynonymous coding | 32% |
| MM04T | EPG5            | ectopic P-granules autophagy protein 5 homolog (C. elegans) | CCDS11926.2     | chr18_43446791-43446791_G_T   | 2198S>Y | Substitution | Nonsynonymous coding | 39% |
| MM04T | EPG5            | ectopic P-granules autophagy protein 5 homolog (C. elegans) | CCDS11926.2     | chr18_43490649-43490649_A_C   | 1348L>V | Substitution | Nonsynonymous coding | 24% |
| MM04T | EPG5            | ectopic P-granules autophagy protein 5 homolog (C. elegans) | CCDS11926.2     | chr18_43532513-43532513_C_T   | 369D>N  | Substitution | Nonsynonymous coding | 21% |
| MM04T | EPHA3           | EPH receptor A3                                             | CCDS2922.1      | chr3_89259282-89259282_G_T    | 142K>N  | Substitution | Nonsynonymous coding | 25% |
| MM04T | EPHA3           | EPH receptor A3                                             | CCDS2922.1      | chr3_89456438-89456438_A_C    | 538E>D  | Substitution | Nonsynonymous coding | 41% |
| MM04T | EPHA4           | EPH receptor A4                                             | CCDS2447.1      | chr2_222307561-222307561_C_T  | 688V>M  | Substitution | Nonsynonymous coding | 24% |
| MM04T | EPHA4           | EPH receptor A4                                             | CCDS2447.1      | chr2_222428558-222428558_T_G  | 239E>A  | Substitution | Nonsynonymous coding | 35% |
| MM04T | EPHA5           | EPH receptor A5                                             | CCDS3513.1      | chr4_66230770-66230770_G_T    | 734P>H  | Substitution | Nonsynonymous coding | 38% |
| MM04T | EPHA5           | EPH receptor A5                                             | CCDS3513.1      | chr4_66242774-66242774_C_T    | 600E>K  | Substitution | Nonsynonymous coding | 37% |
| MM04T | EPHA5           | EPH receptor A5                                             | CCDS3513.1      | chr4_66467895-66467895_C_A    | 125R>I  | Substitution | Nonsynonymous coding | 29% |
| MM04T | EPHA5           | EPH receptor A5                                             | CCDS3513.1      | chr4_66468014-66468014_C_A    | 85E>D   | Substitution | Nonsynonymous coding | 38% |
| MM04T | EPHA6           | EPH receptor A6                                             | CCDS46876.1     | chr3_96962891-96962891_G_T    | 456D>Y  | Substitution | Nonsynonymous coding | 36% |
| MM04T | EPHA7           | EPH receptor A7                                             | CCDS5031.1      | chr6_94120597-94120597_C_A    | 152D>Y  | Substitution | Nonsynonymous coding | 33% |
| MM04T | EPHA7           | EPH receptor A7                                             | CCDS5031.1      | chr6_93956553-93956553_G_A    | 895R>X  | Substitution | Nonsense             | 30% |
| MM04T | EPHA8           | EPH receptor A8                                             | CCDS225.1       | chr1_22927836-22927836_G_T    | 925G>W  | Substitution | Nonsynonymous coding | 27% |

|       |        |                                                                                                                                                 |             |                              |        |              |                      |     |
|-------|--------|-------------------------------------------------------------------------------------------------------------------------------------------------|-------------|------------------------------|--------|--------------|----------------------|-----|
| MM04T | EPHB2  | EPH receptor B2                                                                                                                                 | CCDS230.1   | chr1_23111411-23111411_C_T   | 218S>L | Substitution | Nonsynonymous coding | 34% |
| MM04T | EPHB6  | EPH receptor B6                                                                                                                                 | CCDS5873.2  | chr7_142563718-142563718_C_A | 369P>H | Substitution | Nonsynonymous coding | 25% |
| MM04T | EPHX4  | epoxide hydrolase 4                                                                                                                             | CCDS736.1   | chr1_92508415-92508415_G_T   | 118S>I | Substitution | Nonsynonymous coding | 32% |
| MM04T | EPRS   | glutamyl-prolyl-tRNA synthetase                                                                                                                 | CCDS31027.1 | chr1_220170332-220170332_G_A | 845S>F | Substitution | Nonsynonymous coding | 27% |
| MM04T | EPX    | eosinophil peroxidase                                                                                                                           | CCDS11602.1 | chr17_56276955-56276955_G_T  | 446R>I | Substitution | Nonsynonymous coding | 24% |
| MM04T | ERAP2  | endoplasmic reticulum aminopeptidase 2                                                                                                          | CCDS4086.1  | chr5_96215729-96215729_G_T   | 114D>Y | Substitution | Nonsynonymous coding | 24% |
| MM04T | ERAP2  | endoplasmic reticulum aminopeptidase 2                                                                                                          | CCDS4086.1  | chr5_96228041-96228041_G_A   | 337E>K | Substitution | Nonsynonymous coding | 19% |
| MM04T | ERBB3  | v-erb-b2 erythroblastic leukemia viral oncogene homolog 3 (avian)                                                                               | CCDS31833.1 | chr12_56477581-56477581_G_T  | 43E>D  | Substitution | Nonsynonymous coding | 27% |
| MM04T | ERCC3  | excision repair cross-complementing rodent repair deficiency, complementation group 3                                                           | CCDS2144.1  | chr2_128050287-128050287_A_G | 124Y>H | Substitution | Nonsynonymous coding | 22% |
| MM04T | ERCC4  | excision repair cross-complementing rodent repair deficiency, complementation group 4                                                           | CCDS32390.1 | chr16_14028108-14028108_T_G  | 388L>V | Substitution | Nonsynonymous coding | 18% |
| MM04T | ERCC4  | excision repair cross-complementing rodent repair deficiency, complementation group 4                                                           | CCDS32390.1 | chr16_14029000-14029000_C_T  | NA     | Substitution | Splice site acceptor | 28% |
| MM04T | ERCC6L | excision repair cross-complementing rodent repair deficiency, complementation group 6-v-ets erythroblastosis virus E26 oncogene homolog (avian) | CCDS35329.1 | chrX_71458748-71458748_C_T   | 5R>Q   | Substitution | Nonsynonymous coding | 15% |
| MM04T | ERG    | v-ets erythroblastosis virus E26 oncogene homolog (avian)                                                                                       | CCDS46648.1 | chr21_39763598-39763598_T_C  | 292D>G | Substitution | Nonsynonymous coding | 26% |
| MM04T | ERGIC3 | ERGIC and golgi 3                                                                                                                               | CCDS13258.1 | chr20_34129891-34129891_G_T  | 15K>N  | Substitution | Nonsynonymous coding | 31% |
| MM04T | ERI2   | ERI1 exoribonuclease family member 2                                                                                                            | CCDS45436.1 | chr16_20814239-20814239_A_C  | 61F>C  | Substitution | Nonsynonymous coding | 25% |
| MM04T | ERI2   | ERI1 exoribonuclease family member 2                                                                                                            | CCDS45436.1 | chr16_20814943-20814943_G_T  | 25L>I  | Substitution | Nonsynonymous coding | 21% |
| MM04T | ERICH1 | glutamate-rich 1                                                                                                                                | CCDS5955.1  | chr8_665983-665983_C_A       | 16R>I  | Substitution | Nonsynonymous coding | 21% |
| MM04T | ERMP1  | endoplasmic reticulum metalloproteinase 1                                                                                                       | CCDS34983.1 | chr9_5812195-5812195_C_A     | 348E>D | Substitution | Nonsynonymous coding | 36% |
| MM04T | ERP27  | endoplasmic reticulum protein 27                                                                                                                | CCDS8670.1  | chr12_15067707-15067707_G_A  | 262R>C | Substitution | Nonsynonymous coding | 33% |
| MM04T | ESPN   | espin                                                                                                                                           | CCDS70.1    | chr1_6520072-6520072_C_T     | 811R>X | Substitution | Nonsense             | 33% |
| MM04T | ESRP1  | epithelial splicing regulatory protein 1                                                                                                        | CCDS47897.1 | chr8_95658444-95658444_G_T   | 142E>X | Substitution | Nonsense             | 29% |
| MM04T | ESRP2  | epithelial splicing regulatory protein 2                                                                                                        | CCDS10863.1 | chr16_68267770-68267770_C_T  | 153D>N | Substitution | Nonsynonymous coding | 30% |
| MM04T | ESYT3  | extended synaptotagmin-like protein 3                                                                                                           | CCDS3101.2  | chr3_138181016-138181016_G_T | 295D>Y | Substitution | Nonsynonymous coding | 12% |
| MM04T | ETAA1  | Ewing tumor-associated antigen 1                                                                                                                | CCDS1882.1  | chr2_67631660-67631660_G_A   | 616D>N | Substitution | Nonsynonymous coding | 20% |
| MM04T | ETF1   | eukaryotic translation termination factor 1                                                                                                     | CCDS4207.1  | chr5_137846307-137846307_G_A | 344L>F | Substitution | Nonsynonymous coding | 35% |
| MM04T | EVI2B  | ecotropic viral integration site 2B                                                                                                             | CCDS11266.1 | chr17_29631853-29631853_C_A  | 259E>X | Substitution | Nonsense             | 12% |
| MM04T | EXD1   | exonuclease 3'-5' domain containing 1                                                                                                           | CCDS10072.1 | chr15_41483675-41483675_G_T  | 219L>I | Substitution | Nonsynonymous coding | 36% |
| MM04T | EXD1   | exonuclease 3'-5' domain containing 1                                                                                                           | CCDS10072.1 | chr15_41488141-41488141_C_A  | 152R>I | Substitution | Nonsynonymous coding | 29% |
| MM04T | EXO5   | exonuclease 5                                                                                                                                   | CCDS453.1   | chr1_40980890-40980890_T_G   | 225F>C | Substitution | Nonsynonymous coding | 37% |
| MM04T | EXOC1  | exocyst complex component 1                                                                                                                     | CCDS3502.1  | chr4_56726672-56726672_G_A   | 74D>N  | Substitution | Nonsynonymous coding | 24% |
| MM04T | EXOC1  | exocyst complex component 1                                                                                                                     | CCDS3502.1  | chr4_56734600-56734600_G_T   | 172E>X | Substitution | Nonsense             | 27% |
| MM04T | EXOC2  | exocyst complex component 2                                                                                                                     | CCDS34327.1 | chr6_564909-564909_C_A       | 488Q>H | Substitution | Nonsynonymous coding | 19% |

|       |         |                                                                                   |             |                              |         |              |                      |     |
|-------|---------|-----------------------------------------------------------------------------------|-------------|------------------------------|---------|--------------|----------------------|-----|
| MM04T | EXOC2   | exocyst complex component 2                                                       | CCDS34327.1 | chr6_619477-619477_C_A       | 163E>D  | Substitution | Nonsynonymous coding | 23% |
| MM04T | EXOC5   | exocyst complex component 5                                                       | CCDS45111.1 | chr14_57710963-57710963_C_T  | 129E>K  | Substitution | Nonsynonymous coding | 25% |
| MM04T | EXOC6B  | exocyst complex component 6B                                                      | CCDS46333.1 | chr2_72740365-72740365_C_A   | 355D>Y  | Substitution | Nonsynonymous coding | 36% |
| MM04T | EXOSC5  | exosome component 5                                                               | CCDS12580.1 | chr19_41898768-41898768_T_G  | NA      | Substitution | Splice site donor    | 19% |
| MM04T | EYA2    | eyes absent homolog 2 (Drosophila)                                                | CCDS13403.1 | chr20_45717931-45717931_G_A  | 239D>N  | Substitution | Nonsynonymous coding | 31% |
| MM04T | EYA2    | eyes absent homolog 2 (Drosophila)                                                | CCDS13403.1 | chr20_45717965-45717965_G_A  | 250R>Q  | Substitution | Nonsynonymous coding | 35% |
| MM04T | EYA3    | eyes absent homolog 3 (Drosophila)                                                | CCDS316.1   | chr1_28300982-28300982_G_A   | 573L>F  | Substitution | Nonsynonymous coding | 25% |
| MM04T | EYS     | eyes shut homolog (Drosophila)                                                    | CCDS47445.1 | chr6_64431603-64431603_T_G   | 2775K>T | Substitution | Nonsynonymous coding | 22% |
| MM04T | EYS     | eyes shut homolog (Drosophila)                                                    | CCDS47445.1 | chr6_65303162-65303162_C_A   | 1242R>I | Substitution | Nonsynonymous coding | 30% |
| MM04T | EZR     | ezrin                                                                             | CCDS5258.1  | chr6_159206479-159206479_A_C | 110I>S  | Substitution | Nonsynonymous coding | 41% |
| MM04T | EZR     | ezrin                                                                             | CCDS5258.1  | chr6_159205763-159205763_G_A | NA      | Substitution | Splice site acceptor | 31% |
| MM04T | F11     | coagulation factor XI                                                             | CCDS3847.1  | chr4_187206855-187206855_G_T | 456E>D  | Substitution | Nonsynonymous coding | 18% |
| MM04T | F12     | coagulation factor XII (Hageman factor)                                           | CCDS34302.1 | chr5_176832185-176832185_C_A | 133E>D  | Substitution | Nonsynonymous coding | 28% |
| MM04T | F13A1   | coagulation factor XIII, A1 polypeptide                                           | CCDS4496.1  | chr6_6251137-6251137_C_A     | 199E>D  | Substitution | Nonsynonymous coding | 13% |
| MM04T | F2RL1   | coagulation factor II (thrombin) receptor-like 1                                  | CCDS4033.1  | chr5_76129240-76129240_C_T   | 270R>X  | Substitution | Nonsense             | 21% |
| MM04T | F5      | coagulation factor V (proaccelerin, labile factor)                                | CCDS1281.1  | chr1_169487731-169487731_C_A | 2088K>N | Substitution | Nonsynonymous coding | 31% |
| MM04T | F5      | coagulation factor V (proaccelerin, labile factor)                                | CCDS1281.1  | chr1_169511133-169511133_C_A | 1065K>N | Substitution | Nonsynonymous coding | 31% |
| MM04T | F8      | coagulation factor VIII, procoagulant component                                   | CCDS35457.1 | chrX_154124371-154124371_T_G | 2137N>T | Substitution | Nonsynonymous coding | 32% |
| MM04T | F8      | coagulation factor VIII, procoagulant component                                   | CCDS35457.1 | chrX_154133145-154133145_C_A | 1843A>S | Substitution | Nonsynonymous coding | 11% |
| MM04T | F8      | coagulation factor VIII, procoagulant component                                   | CCDS35457.1 | chrX_154158329-154158329_G_T | 1246L>I | Substitution | Nonsynonymous coding | 28% |
| MM04T | F8      | coagulation factor VIII, procoagulant component                                   | CCDS35457.1 | chrX_154159052-154159052_T_G | 1005K>Q | Substitution | Nonsynonymous coding | 25% |
| MM04T | F8      | coagulation factor VIII, procoagulant component                                   | CCDS35457.1 | chrX_154182270-154182270_C_A | 600E>D  | Substitution | Nonsynonymous coding | 28% |
| MM04T | F9      | coagulation factor IX                                                             | CCDS14666.1 | chrX_138642921-138642921_G_T | 249D>Y  | Substitution | Nonsynonymous coding | 31% |
| MM04T | FABP3   | fatty acid binding protein 3, muscle and heart (mammary-derived growth inhibitor) | CCDS342.1   | chr1_31845798-31845798_T_C   | 22K>E   | Substitution | Nonsynonymous coding | 38% |
| MM04T | FABP5   | fatty acid binding protein 5 (psoriasis-associated)                               | CCDS6228.1  | chr8_82195744-82195744_G_T   | 75E>X   | Substitution | Nonsense             | 20% |
| MM04T | FABP7   | fatty acid binding protein 7, brain                                               | CCDS5127.1  | chr6_123102318-123102318_T_G | 109I>M  | Substitution | Nonsynonymous coding | 34% |
| MM04T | FADD    | Fas (TNFRSF6)-associated via death domain                                         | CCDS8196.1  | chr11_70049703-70049703_C_A  | 46F>L   | Substitution | Nonsynonymous coding | 20% |
| MM04T | FADD    | Fas (TNFRSF6)-associated via death domain                                         | CCDS8196.1  | chr11_70052414-70052414_G_T  | 154E>D  | Substitution | Nonsynonymous coding | 16% |
| MM04T | FAIM2   | Fas apoptotic inhibitory molecule 2                                               | CCDS8791.1  | chr12_50284871-50284871_G_A  | 154T>I  | Substitution | Nonsynonymous coding | 29% |
| MM04T | FAM111A | family with sequence similarity 111, member A                                     | CCDS7973.1  | chr11_58920169-58920169_C_T  | 343S>L  | Substitution | Nonsynonymous coding | 34% |
| MM04T | FAM111B | family with sequence similarity 111, member B                                     | CCDS7972.1  | chr11_58893110-58893110_A_C  | 514K>Q  | Substitution | Nonsynonymous coding | 34% |
| MM04T | FAM111B | family with sequence similarity 111, member B                                     | CCDS7972.1  | chr11_58893641-58893641_C_A  | 691L>I  | Substitution | Nonsynonymous coding | 32% |

|       |          |                                                                            |                 |                               |         |              |                      |     |
|-------|----------|----------------------------------------------------------------------------|-----------------|-------------------------------|---------|--------------|----------------------|-----|
| MM04T | FAM111B  | family with sequence similarity 111, member B                              | CCDS7972.1      | chr11_58892414-58892414_A_T   | 282K>X  | Substitution | Nonsense             | 39% |
| MM04T | FAM114A1 | family with sequence similarity 114, member A1                             | CCDS3447.1      | chr4_38942622-38942622_A_C    | 524I>L  | Substitution | Nonsynonymous coding | 26% |
| MM04T | FAM120A  | family with sequence similarity 120A                                       | CCDS6706.1      | chr9_96326639-96326639_G_T    | 1058E>D | Substitution | Nonsynonymous coding | 24% |
| MM04T | FAM124A  | family with sequence similarity 124A                                       | CCDS9427.1      | chr13_51855383-51855383_C_A   | 580F>L  | Substitution | Nonsynonymous coding | 20% |
| MM04T | FAM135B  | family with sequence similarity 135, member B                              | CCDS6375.2      | chr8_139144887-139144887_T_G  | 1390E>D | Substitution | Nonsynonymous coding | 33% |
| MM04T | FAM135B  | family with sequence similarity 135, member B                              | CCDS6375.2      | chr8_139164319-139164319_T_C  | 800D>G  | Substitution | Nonsynonymous coding | 23% |
| MM04T | FAM135B  | family with sequence similarity 135, member B                              | CCDS6375.2      | chr8_139209780-139209780_C_T  | 268E>K  | Substitution | Nonsynonymous coding | 17% |
| MM04T | FAM135B  | family with sequence similarity 135, member B                              | CCDS6375.2      | chr8_139255185-139255185_C_A  | 223E>D  | Substitution | Nonsynonymous coding | 39% |
| MM04T | FAM13C   | family with sequence similarity 13, member C                               | CCDS44406.1     | chr10_61014160-61014160_C_T   | 344R>Q  | Substitution | Nonsynonymous coding | 35% |
| MM04T | FAM13C   | family with sequence similarity 13, member C                               | CCDS44406.1     | chr10_61028336-61028336_A_T   | 224F>I  | Substitution | Nonsynonymous coding | 10% |
| MM04T | FAM149B1 | family with sequence similarity 149, member B1                             | CCDS44435.1     | chr10_74968531-74968531_G_A   | 233D>N  | Substitution | Nonsynonymous coding | 30% |
| MM04T | FAM150A  | family with sequence similarity 150, member A                              | CCDS6150.1      | chr8_53452415-53452415_T_C    | 101T>A  | Substitution | Nonsynonymous coding | 35% |
| MM04T | FAM154B  | family with sequence similarity 154, member B                              | CCDS32310.1     | chr15_82564057-82564057_C_T   | 56S>L   | Substitution | Nonsynonymous coding | 24% |
| MM04T | FAM155A  | family with sequence similarity 155, member A                              | CCDS32006.1     | chr13_108518279-108518279_G_T | 222Y>X  | Substitution | Nonsense             | 29% |
| MM04T | FAM161B  | family with sequence similarity 161, member B                              | CCDS9822.1      | chr14_74409272-74409272_G_T   | 358L>M  | Substitution | Nonsynonymous coding | 24% |
| MM04T | FAM161B  | family with sequence similarity 161, member B                              | CCDS9822.1      | chr14_74404303-74404303_A_G   | NA      | Substitution | Splice site donor    | 25% |
| MM04T | FAM167A  | family with sequence similarity 167, member A                              | CCDS5981.1      | chr8_11281901-11281901_C_T    | 209R>Q  | Substitution | Nonsynonymous coding | 29% |
| MM04T | FAM168B  | family with sequence similarity 168, member B                              | CCDS42755.1     | chr2_131840165-131840165_C_A  | 19G>X   | Substitution | Nonsense             | 41% |
| MM04T | FAM169B  | family with sequence similarity 169, member B                              | CCDS45360.1     | chr15_99023958-99023958_T_G   | 19I>L   | Substitution | Nonsynonymous coding | 25% |
| MM04T | FAM172A  | family with sequence similarity 172, member A                              | CCDS4069.1      | chr5_93120106-93120106_G_A    | 336R>X  | Substitution | Nonsense             | 36% |
| MM04T | FAM172BP | family with sequence similarity 172, member B, pseudogene                  | ENST00000313598 | chr3_101240789-101240789_G_T  | 19E>X   | Substitution | Nonsense             | 36% |
| MM04T | FAM179B  | family with sequence similarity 179, member B                              | CCDS9681.1      | chr14_45431759-45431759_G_T   | 45E>D   | Substitution | Nonsynonymous coding | 29% |
| MM04T | FAM180A  | family with sequence similarity 180, member A                              | CCDS5841.1      | chr7_135418723-135418723_T_G  | 174*>C  | Substitution | Nonsynonymous coding | 23% |
| MM04T | FAM181A  | family with sequence similarity 181, member A                              | CCDS9914.1      | chr14_94394744-94394744_G_A   | 100R>H  | Substitution | Nonsynonymous coding | 18% |
| MM04T | FAM181B  | family with sequence similarity 181, member B                              | CCDS31648.1     | chr11_82443745-82443745_C_T   | 343G>S  | Substitution | Nonsynonymous coding | 27% |
| MM04T | FAM193A  | family with sequence similarity 193, member A                              | CCDS33943.1     | chr4_2691412-2691412_C_A      | 546F>L  | Substitution | Nonsynonymous coding | 42% |
| MM04T | FAM194A  | family with sequence similarity 194, member A                              | CCDS3151.2      | chr3_150403561-150403561_C_A  | 251E>X  | Substitution | Nonsense             | 26% |
| MM04T | FAM194B  | family with sequence similarity 194, member B                              | CCDS45045.1     | chr13_46170992-46170992_G_T   | 50S>Y   | Substitution | Nonsynonymous coding | 26% |
| MM04T | FAM196B  | family with sequence similarity 196, member B                              | CCDS47336.1     | chr5_169308432-169308432_C_T  | 454R>Q  | Substitution | Nonsynonymous coding | 30% |
| MM04T | FAM198A  | family with sequence similarity 198, member A                              | CCDS46808.1     | chr3_43074761-43074761_C_T    | 336R>C  | Substitution | Nonsynonymous coding | 31% |
| MM04T | FAM19A2  | family with sequence similarity 19 (chemokine (C-C motif)-like), member A2 | CCDS8962.1      | chr12_62261182-62261182_C_T   | 9A>T    | Substitution | Nonsynonymous coding | 43% |
| MM04T | FAM205B  | family with sequence similarity 205, member B                              | ENST00000455647 | chr9_34835399-34835399_T_G    | 30K>N   | Substitution | Nonsynonymous coding | 50% |

|       |          |                                                           |                 |                              |         |              |                      |     |
|-------|----------|-----------------------------------------------------------|-----------------|------------------------------|---------|--------------|----------------------|-----|
| MM04T | FAM208B  | family with sequence similarity 208, member B             | CCDS41485.1     | chr10_5762872-5762872_G_A    | 29D>N   | Substitution | Nonsynonymous coding | 44% |
| MM04T | FAM208B  | family with sequence similarity 208, member B             | CCDS41485.1     | chr10_5772538-5772538_G_T    | 192K>N  | Substitution | Nonsynonymous coding | 35% |
| MM04T | FAM208B  | family with sequence similarity 208, member B             | CCDS41485.1     | chr10_5803386-5803386_A_G    | 2376N>D | Substitution | Nonsynonymous coding | 19% |
| MM04T | FAM208B  | family with sequence similarity 208, member B             | CCDS41485.1     | chr10_5804993-5804993_T_C    | 2431*>R | Substitution | Nonsynonymous coding | 26% |
| MM04T | FAM213A  | family with sequence similarity 213, member A             | CCDS7368.1      | chr10_82187096-82187096_C_A  | 140F>L  | Substitution | Nonsynonymous coding | 30% |
| MM04T | FAM214A  | family with sequence similarity 214, member A             | CCDS45263.1     | chr15_52877044-52877044_C_A  | 992R>I  | Substitution | Nonsynonymous coding | 32% |
| MM04T | FAM214A  | family with sequence similarity 214, member A             | CCDS45263.1     | chr15_52905953-52905953_G_A  | 40R>X   | Substitution | Nonsense             | 22% |
| MM04T | FAM217A  | family with sequence similarity 217, member A             | CCDS4489.1      | chr6_4069066-4069066_C_A     | 464R>I  | Substitution | Nonsynonymous coding | 27% |
| MM04T | FAM218BP | family with sequence similarity 218, member B, pseudogene | CCDS3807.1      | chr4_165878426-165878426_C_A | 84F>L   | Substitution | Nonsynonymous coding | 34% |
| MM04T | FAM3C    | family with sequence similarity 3, member C               | CCDS5782.1      | chr7_120991324-120991324_C_T | NA      | Substitution | Splice site acceptor | 26% |
| MM04T | FAM45B   | family with sequence similarity 45, member B (pseudogene) | ENST00000408950 | chrX_129629329-129629329_G_T | 66R>I   | Substitution | Nonsynonymous coding | 43% |
| MM04T | FAM45B   | family with sequence similarity 45, member B (pseudogene) | ENST00000408950 | chrX_129629944-129629944_C_A | 271A>E  | Substitution | Nonsynonymous coding | 32% |
| MM04T | FAM46A   | family with sequence similarity 46, member A              | CCDS34489.1     | chr6_82459997-82459997_C_A   | 248E>D  | Substitution | Nonsynonymous coding | 36% |
| MM04T | FAM46D   | family with sequence similarity 46, member D              | CCDS14446.1     | chrX_79698342-79698342_G_T   | 102D>Y  | Substitution | Nonsynonymous coding | 28% |
| MM04T | FAM5C    | family with sequence similarity 5, member C               | CCDS1373.1      | chr1_190203552-190203552_G_T | 225S>Y  | Substitution | Nonsynonymous coding | 27% |
| MM04T | FAM5C    | family with sequence similarity 5, member C               | CCDS1373.1      | chr1_190234101-190234101_G_A | 171S>L  | Substitution | Nonsynonymous coding | 25% |
| MM04T | FAM5C    | family with sequence similarity 5, member C               | CCDS1373.1      | chr1_190234137-190234137_C_T | 159R>Q  | Substitution | Nonsynonymous coding | 38% |
| MM04T | FAM5C    | family with sequence similarity 5, member C               | CCDS1373.1      | chr1_190250841-190250841_C_A | 92E>D   | Substitution | Nonsynonymous coding | 23% |
| MM04T | FAM5C    | family with sequence similarity 5, member C               | CCDS1373.1      | chr1_190424010-190424010_C_T | 4R>Q    | Substitution | Nonsynonymous coding | 30% |
| MM04T | FAM63B   | family with sequence similarity 63, member B              | CCDS42046.1     | chr15_59124080-59124080_C_T  | 445R>W  | Substitution | Nonsynonymous coding | 30% |
| MM04T | FAM63B   | family with sequence similarity 63, member B              | CCDS42046.1     | chr15_59146766-59146766_A_G  | 608D>G  | Substitution | Nonsynonymous coding | 31% |
| MM04T | FAM65B   | family with sequence similarity 65, member B              | CCDS47383.1     | chr6_24828445-24828445_G_T   | 883T>N  | Substitution | Nonsynonymous coding | 35% |
| MM04T | FAM69A   | family with sequence similarity 69, member A              | CCDS44173.1     | chr1_93309421-93309421_G_A   | 269A>V  | Substitution | Nonsynonymous coding | 34% |
| MM04T | FAM69A   | family with sequence similarity 69, member A              | CCDS44173.1     | chr1_93309074-93309074_C_A   | 385E>X  | Substitution | Nonsense             | 21% |
| MM04T | FAM71A   | family with sequence similarity 71, member A              | CCDS1507.1      | chr1_212799958-212799958_C_A | 580S>Y  | Substitution | Nonsynonymous coding | 31% |
| MM04T | FAM71F1  | family with sequence similarity 71, member F1             | CCDS5804.1      | chr7_128355540-128355540_G_T | 15K>N   | Substitution | Nonsynonymous coding | 31% |
| MM04T | FAM78A   | family with sequence similarity 78, member A              | CCDS6941.2      | chr9_134151321-134151321_C_A | 82K>N   | Substitution | Nonsynonymous coding | 25% |
| MM04T | FAM83B   | family with sequence similarity 83, member B              | CCDS34479.1     | chr6_54806160-54806160_T_G   | 797F>L  | Substitution | Nonsynonymous coding | 39% |
| MM04T | FAM8A1   | family with sequence similarity 8, member A1              | CCDS4540.1      | chr6_17605171-17605171_G_T   | 290E>X  | Substitution | Nonsense             | 21% |
| MM04T | FAM91A1  | family with sequence similarity 91, member A1             | CCDS6346.2      | chr8_124792783-124792783_G_A | NA      | Substitution | Splice site donor    | 29% |
| MM04T | FAM92B   | family with sequence similarity 92, member B              | CCDS32500.1     | chr16_85133795-85133795_G_A  | 235L>F  | Substitution | Nonsynonymous coding | 19% |
| MM04T | FAM9A    | family with sequence similarity 9, member A               | CCDS14131.1     | chrX_8763444-8763444_C_T     | 169R>K  | Substitution | Nonsynonymous coding | 15% |

|       |         |                                             |             |                              |         |              |                      |     |
|-------|---------|---------------------------------------------|-------------|------------------------------|---------|--------------|----------------------|-----|
| MM04T | FAM9B   | family with sequence similarity 9, member B | CCDS14132.1 | chrX_8995995-8995995_C_A     | 136E>X  | Substitution | Nonsense             | 22% |
| MM04T | FAN1    | FANCD2/FANCI-associated nuclease 1          | CCDS32186.1 | chr15_31197218-31197218_A_C  | 118K>Q  | Substitution | Nonsynonymous coding | 34% |
| MM04T | FAN1    | FANCD2/FANCI-associated nuclease 1          | CCDS32186.1 | chr15_31197222-31197222_G_T  | 119R>M  | Substitution | Nonsynonymous coding | 22% |
| MM04T | FAN1    | FANCD2/FANCI-associated nuclease 1          | CCDS32186.1 | chr15_31214438-31214438_G_A  | 685E>K  | Substitution | Nonsynonymous coding | 27% |
| MM04T | FANCB   | Fanconi anemia, complementation group B     | CCDS14161.1 | chrX_14883337-14883337__T    | NA      | Insertion    | Frameshift           | 30% |
| MM04T | FANCB   | Fanconi anemia, complementation group B     | CCDS14161.1 | chrX_14871234-14871234_A_C   | 418I>S  | Substitution | Nonsynonymous coding | 34% |
| MM04T | FANCF   | Fanconi anemia, complementation group F     | CCDS7857.1  | chr11_22646381-22646381_G_T  | 326L>I  | Substitution | Nonsynonymous coding | 34% |
| MM04T | FANCI   | Fanconi anemia, complementation group I     | CCDS45346.1 | chr15_89819979-89819979_G_T  | 384E>X  | Substitution | Nonsense             | 27% |
| MM04T | FANCM   | Fanconi anemia, complementation group M     | CCDS32070.1 | chr14_45658140-45658140__A   | NA      | Insertion    | Frameshift           | 17% |
| MM04T | FANCM   | Fanconi anemia, complementation group M     | CCDS32070.1 | chr14_45645960-45645960_A_C  | 1335K>Q | Substitution | Nonsynonymous coding | 25% |
| MM04T | FAR2    | fatty acyl CoA reductase 2                  | CCDS8717.1  | chr12_29463979-29463979_C_T  | 263R>W  | Substitution | Nonsynonymous coding | 24% |
| MM04T | FARSA   | phenylalanyl-tRNA synthetase, alpha subunit | CCDS12287.1 | chr19_13035466-13035466_G_T  | 394F>L  | Substitution | Nonsynonymous coding | 21% |
| MM04T | FAS     | Fas (TNF receptor superfamily, member 6)    | CCDS7393.1  | chr10_90762789-90762789_C_A  | 12L>I   | Substitution | Nonsynonymous coding | 15% |
| MM04T | FAS     | Fas (TNF receptor superfamily, member 6)    | CCDS7393.1  | chr10_90774060-90774060_G_T  | 287K>N  | Substitution | Nonsynonymous coding | 18% |
| MM04T | FASTKD3 | FAST kinase domains 3                       | CCDS3873.1  | chr5_7867125-7867125_G_A     | 358R>C  | Substitution | Nonsynonymous coding | 39% |
| MM04T | FASTKD3 | FAST kinase domains 3                       | CCDS3873.1  | chr5_7868054-7868054_C_T     | 48R>Q   | Substitution | Nonsynonymous coding | 38% |
| MM04T | FASTKD5 | FAST kinase domains 5                       | CCDS13048.1 | chr20_3128870-3128870_G_T    | 283H>N  | Substitution | Nonsynonymous coding | 36% |
| MM04T | FAT1    | FAT tumor suppressor homolog 1 (Drosophila) | CCDS47177.1 | chr4_187539573-187539573_C_A | 2723D>Y | Substitution | Nonsynonymous coding | 26% |
| MM04T | FAT1    | FAT tumor suppressor homolog 1 (Drosophila) | CCDS47177.1 | chr4_187629879-187629879_T_C | 368E>G  | Substitution | Nonsynonymous coding | 30% |
| MM04T | FAT1    | FAT tumor suppressor homolog 1 (Drosophila) | CCDS47177.1 | chr4_187630240-187630240_C_T | 248E>K  | Substitution | Nonsynonymous coding | 25% |
| MM04T | FAT4    | FAT tumor suppressor homolog 4 (Drosophila) | CCDS3732.3  | chr4_126240262-126240262_G_T | 899S>I  | Substitution | Nonsynonymous coding | 27% |
| MM04T | FAT4    | FAT tumor suppressor homolog 4 (Drosophila) | CCDS3732.3  | chr4_126370291-126370291_T_G | 2707I>S | Substitution | Nonsynonymous coding | 29% |
| MM04T | FAT4    | FAT tumor suppressor homolog 4 (Drosophila) | CCDS3732.3  | chr4_126370930-126370930_T_G | 2920I>S | Substitution | Nonsynonymous coding | 28% |
| MM04T | FAT4    | FAT tumor suppressor homolog 4 (Drosophila) | CCDS3732.3  | chr4_126371994-126371994_G_A | 3275D>N | Substitution | Nonsynonymous coding | 27% |
| MM04T | FAT4    | FAT tumor suppressor homolog 4 (Drosophila) | CCDS3732.3  | chr4_126329778-126329778_C_T | 1917R>X | Substitution | Nonsense             | 30% |
| MM04T | FATE1   | fetal and adult testis expressed 1          | CCDS14700.1 | chrX_150890388-150890388_G_T | 119D>Y  | Substitution | Nonsynonymous coding | 20% |
| MM04T | FBN2    | fibrillin 2                                 | CCDS34222.1 | chr5_127615955-127615955_T_C | 2356N>S | Substitution | Nonsynonymous coding | 38% |
| MM04T | FBN2    | fibrillin 2                                 | CCDS34222.1 | chr5_127702116-127702116_G_T | 752F>L  | Substitution | Nonsynonymous coding | 24% |
| MM04T | FBXL16  | F-box and leucine-rich repeat protein 16    | CCDS10421.1 | chr16_747109-747109_C_A      | 99E>D   | Substitution | Nonsynonymous coding | 20% |
| MM04T | FBXL2   | F-box and leucine-rich repeat protein 2     | CCDS2658.1  | chr3_33416874-33416874_C_A   | 251S>Y  | Substitution | Nonsynonymous coding | 31% |
| MM04T | FBXO17  | F-box protein 17                            | CCDS12526.1 | chr19_39439234-39439234_G_A  | 145S>L  | Substitution | Nonsynonymous coding | 24% |
| MM04T | FBXO24  | F-box protein 24                            | CCDS5698.1  | chr7_100198444-100198444_C_A | 555F>L  | Substitution | Nonsynonymous coding | 37% |



|       |         |                                                                      |                 |                               |        |              |                      |     |
|-------|---------|----------------------------------------------------------------------|-----------------|-------------------------------|--------|--------------|----------------------|-----|
| MM04T | FBXO3   | F-box protein 3                                                      | CCDS7887.1      | chr11_33763483-33763483_G_A   | 463R>C | Substitution | Nonsynonymous coding | 29% |
| MM04T | FBXO34  | F-box protein 34                                                     | CCDS32086.1     | chr14_55818887-55818887_G_T   | 593K>N | Substitution | Nonsynonymous coding | 25% |
| MM04T | FBXO47  | F-box protein 47                                                     | CCDS32639.1     | chr17_37107892-37107892_G_T   | 186F>L | Substitution | Nonsynonymous coding | 16% |
| MM04T | FBXO6   | F-box protein 6                                                      | CCDS133.1       | chr1_11728959-11728959_C_T    | 82R>W  | Substitution | Nonsynonymous coding | 16% |
| MM04T | FBXO9   | F-box protein 9                                                      | NM_012347       | chr6_52960341-52960341_C_T    | 372R>C | Substitution | Nonsynonymous coding | 31% |
| MM04T | FBXO9   | F-box protein 9                                                      | NM_012347       | chr6_52962610-52962610_C_A    | 442F>L | Substitution | Nonsynonymous coding | 20% |
| MM04T | FBXW12  | F-box and WD repeat domain containing 12                             | NM_001159929    | chr3_48413802-48413802_G_T    | 9D>Y   | Substitution | Nonsynonymous coding | 21% |
| MM04T | FBXW2   | F-box and WD repeat domain containing 2                              | CCDS43872.1     | chr9_123538482-123538482_A_C  | 236D>E | Substitution | Nonsynonymous coding | 17% |
| MM04T | FBXW7   | F-box and WD repeat domain containing 7, E3 ubiquitin protein ligase | CCDS3777.1      | chr4_153249457-153249457_G_A  | 441R>W | Substitution | Nonsynonymous coding | 36% |
| MM04T | FBXW7   | F-box and WD repeat domain containing 7, E3 ubiquitin protein ligase | CCDS3777.1      | chr4_153332556-153332556_C_A  | 134E>X | Substitution | Nonsense             | 33% |
| MM04T | FCGR2B  | Fc fragment of IgG, low affinity IIb, receptor (CD32)                | CCDS30924.1     | chr1_161647303-161647303_C_T  | 298P>L | Substitution | Nonsynonymous coding | 30% |
| MM04T | FCHSD2  | FCH and double SH3 domains 2                                         | CCDS8218.2      | chr11_72553812-72553812_T_G   | 594I>L | Substitution | Nonsynonymous coding | 23% |
| MM04T | FCRL6   | Fc receptor-like 6                                                   | CCDS30912.1     | chr1_159778787-159778787_C_T  | 119S>F | Substitution | Nonsynonymous coding | 16% |
| MM04T | FDXACB1 | ferredoxin-fold anticodon binding domain containing 1                | CCDS44729.1     | chr11_111746764-111746764_A_C | 253L>V | Substitution | Nonsynonymous coding | 29% |
| MM04T | FEN1    | flap structure-specific endonuclease 1                               | CCDS8010.1      | chr11_61563500-61563500_T_C   | 223F>L | Substitution | Nonsynonymous coding | 29% |
| MM04T | FER1L6  | fer-1-like 6 (C. elegans)                                            | CCDS43767.1     | chr8_124975580-124975580_G_T  | 47D>Y  | Substitution | Nonsynonymous coding | 24% |
| MM04T | FER1L6  | fer-1-like 6 (C. elegans)                                            | CCDS43767.1     | chr8_124988139-124988139_A_G  | 229N>D | Substitution | Nonsynonymous coding | 19% |
| MM04T | FERMT1  | fermitin family member 1                                             | CCDS13098.1     | chr20_6068464-6068464_A_G     | 444V>A | Substitution | Nonsynonymous coding | 30% |
| MM04T | FGA     | fibrinogen alpha chain                                               | CCDS3787.1      | chr4_155507614-155507614_G_A  | 323P>S | Substitution | Nonsynonymous coding | 22% |
| MM04T | FGD2    | FYVE, RhoGEF and PH domain containing 2                              | CCDS4829.1      | chr6_36976732-36976732_A_G    | 64E>G  | Substitution | Nonsynonymous coding | 24% |
| MM04T | FGF19   | fibroblast growth factor 19                                          | CCDS8193.1      | chr11_69514117-69514117_G_T   | 188F>L | Substitution | Nonsynonymous coding | 23% |
| MM04T | FGF3    | fibroblast growth factor 3                                           | CCDS8195.1      | chr11_69631089-69631089_G_A   | 108S>L | Substitution | Nonsynonymous coding | 30% |
| MM04T | FGL1    | fibrinogen-like 1                                                    | CCDS6004.1      | chr8_17739682-17739682_C_T    | 24E>K  | Substitution | Nonsynonymous coding | 32% |
| MM04T | FH      | fumarate hydratase                                                   | CCDS1617.1      | chr1_241672025-241672025_C_A  | 206V>L | Substitution | Nonsynonymous coding | 32% |
| MM04T | FHAD1   | forkhead-associated (FHA) phosphopeptide binding domain 1            | ENST00000401090 | chr1_15690249-15690249_G_T    | 145K>N | Substitution | Nonsynonymous coding | 37% |
| MM04T | FHDC1   | FH2 domain containing 1                                              | CCDS34081.1     | chr4_153881906-153881906_C_T  | 254R>W | Substitution | Nonsynonymous coding | 48% |
| MM04T | FIGF    | c-fos induced growth factor (vascular endothelial growth factor D)   | CCDS14166.1     | chrX_15381368-15381368_C_T    | 55R>Q  | Substitution | Nonsynonymous coding | 32% |
| MM04T | FIGF    | c-fos induced growth factor (vascular endothelial growth factor D)   | CCDS14166.1     | chrX_15381416-15381416_C_T    | 39R>Q  | Substitution | Nonsynonymous coding | 44% |
| MM04T | FIGN    | fidgetin                                                             | CCDS2221.2      | chr2_164467599-164467599_G_T  | 248P>Q | Substitution | Nonsynonymous coding | 26% |
| MM04T | FIGNL1  | fidgetin-like 1                                                      | CCDS5510.1      | chr7_50513740-50513740_T_C    | 416I>V | Substitution | Nonsynonymous coding | 11% |
| MM04T | FILIP1  | filamin A interacting protein 1                                      | CCDS4984.1      | chr6_76022810-76022810_C_T    | 913R>Q | Substitution | Nonsynonymous coding | 22% |
| MM04T | FILIP1  | filamin A interacting protein 1                                      | CCDS4984.1      | chr6_76023553-76023553_C_A    | 665Q>H | Substitution | Nonsynonymous coding | 32% |

|       |         |                                                                     |                 |                              |         |              |                      |     |
|-------|---------|---------------------------------------------------------------------|-----------------|------------------------------|---------|--------------|----------------------|-----|
| MM04T | FILIP1  | filamin A interacting protein 1                                     | CCDS4984.1      | chr6_76124519-76124519_C_T   | 57R>Q   | Substitution | Nonsynonymous coding | 24% |
| MM04T | FILIP1  | filamin A interacting protein 1                                     | CCDS4984.1      | chr6_76024677-76024677_C_A   | 291E>X  | Substitution | Nonsense             | 24% |
| MM04T | FILIP1L | filamin A interacting protein 1-like                                | CCDS43117.1     | chr3_99568368-99568368_C_A   | 718E>X  | Substitution | Nonsense             | 28% |
| MM04T | FJX1    | four jointed box 1 (Drosophila)                                     | CCDS44570.1     | chr11_35640581-35640581_C_T  | 133P>S  | Substitution | Nonsynonymous coding | 22% |
| MM04T | FKBP15  | FK506 binding protein 15, 133kDa                                    | CCDS48007.1     | chr9_115931907-115931907_C_T | 1028E>K | Substitution | Nonsynonymous coding | 23% |
| MM04T | FKBPL   | FK506 binding protein like                                          | CCDS4738.1      | chr6_32097328-32097328_G_A   | 77S>F   | Substitution | Nonsynonymous coding | 38% |
| MM04T | FLAD1   | FAD1 flavin adenine dinucleotide synthetase homolog (S. cerevisiae) | CCDS1078.1      | chr1_154956384-154956384_C_T | 72P>S   | Substitution | Nonsynonymous coding | 42% |
| MM04T | FLG2    | flaggrin family member 2                                            | CCDS30861.1     | chr1_152329042-152329042_G_T | 407S>Y  | Substitution | Nonsynonymous coding | 26% |
| MM04T | FLII    | flightless I homolog (Drosophila)                                   | CCDS11192.1     | chr17_18150327-18150327_C_A  | 906G>C  | Substitution | Nonsynonymous coding | 31% |
| MM04T | FLII    | flightless I homolog (Drosophila)                                   | CCDS11192.1     | chr17_18151948-18151948_G_T  | 702F>L  | Substitution | Nonsynonymous coding | 26% |
| MM04T | FLII    | flightless I homolog (Drosophila)                                   | CCDS11192.1     | chr17_18154609-18154609_G_T  | 522F>L  | Substitution | Nonsynonymous coding | 18% |
| MM04T | FLNA    | filamin A, alpha                                                    | CCDS48194.1     | chrX_153582395-153582395_G_T | 1858F>L | Substitution | Nonsynonymous coding | 43% |
| MM04T | FLNB    | filamin B, beta                                                     | CCDS2885.1      | chr3_58131773-58131773_G_T   | 1851E>X | Substitution | Nonsense             | 22% |
| MM04T | FLNC    | filamin C, gamma                                                    | CCDS43644.1     | chr7_128497270-128497270_G_A | 2554E>K | Substitution | Nonsynonymous coding | 25% |
| MM04T | FLT1    | fms-related tyrosine kinase 1                                       | CCDS9330.1      | chr13_28885803-28885803_G_A  | 1187P>S | Substitution | Nonsynonymous coding | 30% |
| MM04T | FLT3    | fms-related tyrosine kinase 3                                       | CCDS31953.1     | chr13_28644738-28644738_C_T  | 19A>T   | Substitution | Nonsynonymous coding | 62% |
| MM04T | FLT4    | fms-related tyrosine kinase 4                                       | ENST00000376868 | chr5_180046652-180046652_G_A | 697A>V  | Substitution | Nonsynonymous coding | 32% |
| MM04T | FMN1    | formin 1                                                            | CCDS45209.1     | chr15_33300232-33300232_C_A  | 513E>X  | Substitution | Nonsense             | 19% |
| MM04T | FMN2    | formin 2                                                            | CCDS31069.2     | chr1_240635737-240635737_G_T | 1709R>I | Substitution | Nonsynonymous coding | 25% |
| MM04T | FMNL1   | formin-like 1                                                       | CCDS11497.1     | chr17_43311458-43311458_G_T  | 169D>Y  | Substitution | Nonsynonymous coding | 12% |
| MM04T | FMNL1   | formin-like 1                                                       | CCDS11497.1     | chr17_43323302-43323302_G_A  | 1018A>T | Substitution | Nonsynonymous coding | 34% |
| MM04T | FMNL2   | formin-like 2                                                       | CCDS46429.1     | chr2_153493095-153493095_G_T | 945K>N  | Substitution | Nonsynonymous coding | 22% |
| MM04T | FMO2    | flavin containing monooxygenase 2 (non-functional)                  | CCDS1293.1      | chr1_171178026-171178026_C_A | 450C>X  | Substitution | Nonsense             | 23% |
| MM04T | FMO3    | flavin containing monooxygenase 3                                   | CCDS1292.1      | chr1_171080043-171080043_G_T | 244K>N  | Substitution | Nonsynonymous coding | 33% |
| MM04T | FMO3    | flavin containing monooxygenase 3                                   | CCDS1292.1      | chr1_171086275-171086275_T_G | 431I>S  | Substitution | Nonsynonymous coding | 43% |
| MM04T | FMR1NB  | fragile X mental retardation 1 neighbor                             | CCDS14683.1     | chrX_147084798-147084798_G_T | 119D>Y  | Substitution | Nonsynonymous coding | 26% |
| MM04T | FN1     | fibronectin 1                                                       | CCDS42814.1     | chr2_216286864-216286864_A_C | 499V>G  | Substitution | Nonsynonymous coding | 34% |
| MM04T | FNBP1   | formin binding protein 1                                            | CCDS48040.1     | chr9_132689480-132689480_C_A | 261Q>H  | Substitution | Nonsynonymous coding | 30% |
| MM04T | FNBP1L  | formin binding protein 1-like                                       | NM_001164473    | chr1_94012435-94012435_G_T   | 437K>N  | Substitution | Nonsynonymous coding | 39% |
| MM04T | FNDC1   | fibronectin type III domain containing 1                            | CCDS47512.1     | chr6_159660646-159660646_T_G | 1426I>M | Substitution | Nonsynonymous coding | 39% |
| MM04T | FNDC3B  | fibronectin type III domain containing 3B                           | ENST00000443501 | chr3_171844832-171844832_G_T | 5E>D    | Substitution | Nonsynonymous coding | 32% |
| MM04T | FNDC7   | fibronectin type III domain containing 7                            | CCDS44185.1     | chr1_109261499-109261499_C_A | 142F>L  | Substitution | Nonsynonymous coding | 28% |

|       |        |                                              |                 |                               |         |              |                      |     |
|-------|--------|----------------------------------------------|-----------------|-------------------------------|---------|--------------|----------------------|-----|
| MM04T | FNIP1  | folliculin interacting protein 1             | CCDS34227.1     | chr5_131007228-131007228_C_A  | 970W>L  | Substitution | Nonsynonymous coding | 24% |
| MM04T | FOCAD  | focadhesin                                   | CCDS34993.1     | chr9_20720405-20720405_G_T    | 53E>D   | Substitution | Nonsynonymous coding | 18% |
| MM04T | FOCAD  | focadhesin                                   | CCDS34993.1     | chr9_20981683-20981683_C_T    | 1546R>W | Substitution | Nonsynonymous coding | 20% |
| MM04T | FOLH1B | folate hydrolase 1B                          | CCDS8286.1      | chr11_89431707-89431707_G_T   | 423Q>H  | Substitution | Nonsynonymous coding | 26% |
| MM04T | FOXA1  | forkhead box A1                              | CCDS9665.1      | chr14_38060629-38060629_C_A   | 454A>S  | Substitution | Nonsynonymous coding | 23% |
| MM04T | FOXB2  | forkhead box B2                              | CCDS35045.1     | chr9_79634887-79634887_G_A    | 106R>H  | Substitution | Nonsynonymous coding | 23% |
| MM04T | FOXF2  | forkhead box F2                              | CCDS4472.1      | chr6_1394981-1394981_G_T      | 408D>Y  | Substitution | Nonsynonymous coding | 23% |
| MM04T | FOXN4  | forkhead box N4                              | CCDS9126.2      | chr12_109725673-109725673_G_T | 148F>L  | Substitution | Nonsynonymous coding | 28% |
| MM04T | FOXN4  | forkhead box N4                              | CCDS9126.2      | chr12_109728038-109728038_G_A | 47S>L   | Substitution | Nonsynonymous coding | 31% |
| MM04T | FOXO1  | forkhead box O1                              | CCDS9371.1      | chr13_41134681-41134681_C_T   | 316R>Q  | Substitution | Nonsynonymous coding | 18% |
| MM04T | FOXO1  | forkhead box O1                              | CCDS9371.1      | chr13_41134822-41134822_C_T   | 269R>Q  | Substitution | Nonsynonymous coding | 21% |
| MM04T | FOXP2  | forkhead box P2                              | CCDS43635.1     | chr7_114066702-114066702_A_G  | 46T>A   | Substitution | Nonsynonymous coding | 44% |
| MM04T | FOXP2  | forkhead box P2                              | CCDS43635.1     | chr7_114298221-114298221_C_T  | 481P>L  | Substitution | Nonsynonymous coding | 20% |
| MM04T | FOXP2  | forkhead box P2                              | CCDS43635.1     | chr7_114282503-114282503_G_T  | 297E>X  | Substitution | Nonsense             | 27% |
| MM04T | FOXP3  | forkhead box P3                              | CCDS14323.1     | chrX_49113304-49113304_G_A    | 184S>L  | Substitution | Nonsynonymous coding | 24% |
| MM04T | FOXR1  | forkhead box R1                              | CCDS31688.1     | chr11_118849803-118849803_G_T | 91K>N   | Substitution | Nonsynonymous coding | 24% |
| MM04T | FOXR1  | forkhead box R1                              | CCDS31688.1     | chr11_118850239-118850239_C_T | 158R>W  | Substitution | Nonsynonymous coding | 33% |
| MM04T | FRAS1  | Fraser syndrome 1                            | NM_025074       | chr4_79207658-79207658_G_A    | 500G>E  | Substitution | Nonsynonymous coding | 35% |
| MM04T | FREM1  | FRAS1 related extracellular matrix 1         | CCDS47952.1     | chr9_14823326-14823326_C_T    | NA      | Substitution | Splice site acceptor | 54% |
| MM04T | FREM1  | FRAS1 related extracellular matrix 1         | CCDS47952.1     | chr9_14801851-14801851_C_A    | 1165E>X | Substitution | Nonsense             | 35% |
| MM04T | FREM2  | FRAS1 related extracellular matrix protein 2 | CCDS31960.1     | chr13_39357219-39357219_T_G   | 1885F>C | Substitution | Nonsynonymous coding | 24% |
| MM04T | FREM3  | FRAS1 related extracellular matrix 3         | NM_001168235    | chr4_144545418-144545418_G_T  | 1832F>L | Substitution | Nonsynonymous coding | 18% |
| MM04T | FREM3  | FRAS1 related extracellular matrix 3         | NM_001168235    | chr4_144618242-144618242_A_C  | 1196L>R | Substitution | Nonsynonymous coding | 22% |
| MM04T | FREM3  | FRAS1 related extracellular matrix 3         | NM_001168235    | chr4_144619904-144619904_A_G  | 642V>A  | Substitution | Nonsynonymous coding | 20% |
| MM04T | FRMD7  | FERM domain containing 7                     | CCDS35397.1     | chrX_131212303-131212303_T_C  | 581N>S  | Substitution | Nonsynonymous coding | 17% |
| MM04T | FRMD7  | FERM domain containing 7                     | CCDS35397.1     | chrX_131212315-131212315_G_A  | 577A>V  | Substitution | Nonsynonymous coding | 25% |
| MM04T | FRMPD1 | FERM and PDZ domain containing 1             | CCDS6612.1      | chr9_37745905-37745905_G_T    | 1292E>D | Substitution | Nonsynonymous coding | 24% |
| MM04T | FRMPD2 | FERM and PDZ domain containing 2             | CCDS31195.1     | chr10_49409370-49409370_C_A   | 619D>Y  | Substitution | Nonsynonymous coding | 35% |
| MM04T | FRMPD2 | FERM and PDZ domain containing 2             | CCDS31195.1     | chr10_49420125-49420125_C_T   | 495V>I  | Substitution | Nonsynonymous coding | 36% |
| MM04T | FRMPD2 | FERM and PDZ domain containing 2             | CCDS31195.1     | chr10_49392633-49392633_C_A   | 854E>X  | Substitution | Nonsense             | 25% |
| MM04T | FRMPD3 | FERM and PDZ domain containing 3             | ENST00000276185 | chrX_106846551-106846551_C_T  | 1794S>L | Substitution | Nonsynonymous coding | 18% |
| MM04T | FRRS1  | ferric-chelate reductase 1                   | CCDS30780.1     | chr1_100181216-100181216_G_A  | 417L>F  | Substitution | Nonsynonymous coding | 31% |

|       |        |                                                   |                 |                               |         |              |                      |     |
|-------|--------|---------------------------------------------------|-----------------|-------------------------------|---------|--------------|----------------------|-----|
| MM04T | FRY    | furry homolog (Drosophila)                        | ENST00000267067 | chr13_32660087-32660087_G_T   | 36R>I   | Substitution | Nonsynonymous coding | 19% |
| MM04T | FRY    | furry homolog (Drosophila)                        | CCDS41875.1     | chr13_32721489-32721489_G_A   | 417R>Q  | Substitution | Nonsynonymous coding | 29% |
| MM04T | FRY    | furry homolog (Drosophila)                        | CCDS41875.1     | chr13_32863860-32863860_G_A   | 2854E>K | Substitution | Nonsynonymous coding | 33% |
| MM04T | FRYL   | FRY-like                                          | CCDS43227.1     | chr4_48542442-48542442_T_G    | 2075M>L | Substitution | Nonsynonymous coding | 31% |
| MM04T | FRYL   | FRY-like                                          | CCDS43227.1     | chr4_48549696-48549696_C_T    | 1660R>Q | Substitution | Nonsynonymous coding | 33% |
| MM04T | FRZB   | frizzled-related protein                          | CCDS2286.1      | chr2_183730885-183730885_C_A  | 132E>D  | Substitution | Nonsynonymous coding | 27% |
| MM04T | FSCB   | fibrous sheath CABYR binding protein              | CCDS9679.1      | chr14_44973994-44973994_C_A   | 733E>X  | Substitution | Nonsense             | 27% |
| MM04T | FSD1   | fibronectin type III and SPRY domain containing 1 | CCDS12127.1     | chr19_4312033-4312033_G_A     | 229E>K  | Substitution | Nonsynonymous coding | 48% |
| MM04T | FSD2   | fibronectin type III and SPRY domain containing 2 | CCDS45332.1     | chr15_83440960-83440960_T_G   | 378N>H  | Substitution | Nonsynonymous coding | 22% |
| MM04T | FSIP2  | fibrous sheath interacting protein 2              | ENST00000424728 | chr2_186654626-186654626_T_A  | 921N>K  | Substitution | Nonsynonymous coding | 38% |
| MM04T | FSIP2  | fibrous sheath interacting protein 2              | ENST00000424728 | chr2_186654858-186654858_C_A  | 999L>I  | Substitution | Nonsynonymous coding | 32% |
| MM04T | FSIP2  | fibrous sheath interacting protein 2              | ENST00000424728 | chr2_186655381-186655381_C_A  | 1173S>Y | Substitution | Nonsynonymous coding | 27% |
| MM04T | FSIP2  | fibrous sheath interacting protein 2              | ENST00000424728 | chr2_186656539-186656539_C_A  | 1559P>H | Substitution | Nonsynonymous coding | 27% |
| MM04T | FSIP2  | fibrous sheath interacting protein 2              | ENST00000424728 | chr2_186659698-186659698_A_C  | 2612N>T | Substitution | Nonsynonymous coding | 25% |
| MM04T | FSIP2  | fibrous sheath interacting protein 2              | ENST00000424728 | chr2_186664897-186664897_G_T  | 3622D>Y | Substitution | Nonsynonymous coding | 27% |
| MM04T | FSIP2  | fibrous sheath interacting protein 2              | ENST00000424728 | chr2_186665222-186665222_C_T  | 3730S>L | Substitution | Nonsynonymous coding | 37% |
| MM04T | FSIP2  | fibrous sheath interacting protein 2              | ENST00000424728 | chr2_186669545-186669545_G_A  | 5171R>Q | Substitution | Nonsynonymous coding | 30% |
| MM04T | FSIP2  | fibrous sheath interacting protein 2              | ENST00000424728 | chr2_186669641-186669641_A_C  | 5203E>A | Substitution | Nonsynonymous coding | 30% |
| MM04T | FSIP2  | fibrous sheath interacting protein 2              | ENST00000424728 | chr2_186673138-186673138_G_T  | 6369D>Y | Substitution | Nonsynonymous coding | 24% |
| MM04T | FSIP2  | fibrous sheath interacting protein 2              | ENST00000424728 | chr2_186667600-186667600_C_T  | 4523R>X | Substitution | Nonsense             | 24% |
| MM04T | FTMT   | ferritin mitochondrial                            | CCDS4128.1      | chr5_121188269-121188269_C_T  | 204S>F  | Substitution | Nonsynonymous coding | 32% |
| MM04T | FTSJ1  | FtsJ RNA methyltransferase homolog 1 (E. coli)    | CCDS14294.1     | chrX_48340872-48340872_C_T    | 246S>L  | Substitution | Nonsynonymous coding | 22% |
| MM04T | FTSJ1  | FtsJ RNA methyltransferase homolog 1 (E. coli)    | CCDS14294.1     | chrX_48339813-48339813_G_T    | NA      | Substitution | Splice site acceptor | 22% |
| MM04T | FUCA1  | fucosidase, alpha-L- 1, tissue                    | CCDS244.2       | chr1_24180851-24180851_G_A    | 323S>L  | Substitution | Nonsynonymous coding | 24% |
| MM04T | FUK    | fucokinase                                        | CCDS10891.2     | chr16_70497526-70497526_A_G   | 28E>G   | Substitution | Nonsynonymous coding | 22% |
| MM04T | FYTTD1 | forty-two-three domain containing 1               | CCDS3329.1      | chr3_197476947-197476947_T_C  | NA      | Substitution | Splice site donor    | 33% |
| MM04T | FZD10  | frizzled family receptor 10                       | CCDS9267.1      | chr12_130648529-130648529_G_A | 348E>K  | Substitution | Nonsynonymous coding | 21% |
| MM04T | FZD3   | frizzled family receptor 3                        | CCDS6069.1      | chr8_28385478-28385478_C_T    | 401R>X  | Substitution | Nonsense             | 37% |
| MM04T | FZD4   | frizzled family receptor 4                        | CCDS8279.1      | chr11_86662230-86662230_C_T   | 523G>E  | Substitution | Nonsynonymous coding | 22% |
| MM04T | FZD4   | frizzled family receptor 4                        | CCDS8279.1      | chr11_86662764-86662764_G_A   | 345S>F  | Substitution | Nonsynonymous coding | 34% |
| MM04T | FZD6   | frizzled family receptor 6                        | CCDS6298.1      | chr8_104340629-104340629_G_A  | 509R>Q  | Substitution | Nonsynonymous coding | 27% |
| MM04T | FZD9   | frizzled family receptor 9                        | CCDS5548.1      | chr7_72848776-72848776_G_A    | 147D>N  | Substitution | Nonsynonymous coding | 26% |

|       |         |                                                              |                 |                              |        |              |                      |     |
|-------|---------|--------------------------------------------------------------|-----------------|------------------------------|--------|--------------|----------------------|-----|
| MM04T | GAA     | glucosidase, alpha; acid                                     | CCDS32760.1     | chr17_78079554-78079554_G_T  | 185D>Y | Substitution | Nonsynonymous coding | 20% |
| MM04T | GAB3    | GRB2-associated binding protein 3                            | CCDS48198.1     | chrX_153924244-153924244_C_A | 493R>I | Substitution | Nonsynonymous coding | 30% |
| MM04T | GAB3    | GRB2-associated binding protein 3                            | CCDS48198.1     | chrX_153925432-153925432_G_T | 468L>I | Substitution | Nonsynonymous coding | 24% |
| MM04T | GAB4    | GRB2-associated binding protein family, member 4             | CCDS42976.1     | chr22_17468965-17468965_C_A  | 191E>X | Substitution | Nonsense             | 27% |
| MM04T | GABBR1  | gamma-aminobutyric acid (GABA) B receptor, 1                 | CCDS4663.1      | chr6_29589581-29589581_C_T   | 360R>Q | Substitution | Nonsynonymous coding | 24% |
| MM04T | GABPA   | GA binding protein transcription factor, alpha subunit 60kDa | CCDS13575.1     | chr21_27117599-27117599_G_T  | 52K>N  | Substitution | Nonsynonymous coding | 43% |
| MM04T | GABPB1  | GA binding protein transcription factor, beta subunit 1      | CCDS32239.1     | chr15_50581785-50581785_C_A  | 272V>F | Substitution | Nonsynonymous coding | 20% |
| MM04T | GABPB1  | GA binding protein transcription factor, beta subunit 1      | CCDS32239.1     | chr15_50596224-50596224_C_T  | 72R>Q  | Substitution | Nonsynonymous coding | 32% |
| MM04T | GABPB1  | GA binding protein transcription factor, beta subunit 1      | CCDS32239.1     | chr15_50578267-50578267_C_A  | 345E>X | Substitution | Nonsense             | 21% |
| MM04T | GABPB2  | GA binding protein transcription factor, beta subunit 2      | CCDS983.1       | chr1_151089933-151089933_T_G | 330L>V | Substitution | Nonsynonymous coding | 27% |
| MM04T | GABRA1  | gamma-aminobutyric acid (GABA) A receptor, alpha 1           | CCDS4357.1      | chr5_161292738-161292738_G_A | 67E>K  | Substitution | Nonsynonymous coding | 34% |
| MM04T | GABRA3  | gamma-aminobutyric acid (GABA) A receptor, alpha 3           | CCDS14706.1     | chrX_151358324-151358324_A_T | 341F>I | Substitution | Nonsynonymous coding | 32% |
| MM04T | GABRA4  | gamma-aminobutyric acid (GABA) A receptor, alpha 4           | CCDS3473.1      | chr4_46976343-46976343_C_A   | 209E>D | Substitution | Nonsynonymous coding | 30% |
| MM04T | GABRA4  | gamma-aminobutyric acid (GABA) A receptor, alpha 4           | CCDS3473.1      | chr4_46979596-46979596_T_G   | 109K>Q | Substitution | Nonsynonymous coding | 28% |
| MM04T | GABRA6  | gamma-aminobutyric acid (GABA) A receptor, alpha 6           | CCDS4356.1      | chr5_161117246-161117246_G_T | 238R>M | Substitution | Nonsynonymous coding | 19% |
| MM04T | GABRE   | gamma-aminobutyric acid (GABA) A receptor, epsilon           | CCDS14703.1     | chrX_151123215-151123215_G_T | 493F>L | Substitution | Nonsynonymous coding | 21% |
| MM04T | GABRG2  | gamma-aminobutyric acid (GABA) A receptor, gamma 2           | CCDS47333.1     | chr5_161520910-161520910_C_A | 62P>T  | Substitution | Nonsynonymous coding | 23% |
| MM04T | GABRG2  | gamma-aminobutyric acid (GABA) A receptor, gamma 2           | ENST00000393933 | chr5_161579447-161579447_G_T | 407L>F | Substitution | Nonsynonymous coding | 20% |
| MM04T | GABRG3  | gamma-aminobutyric acid (GABA) A receptor, gamma 3           | CCDS45195.1     | chr15_27572031-27572031_C_A  | 116L>I | Substitution | Nonsynonymous coding | 35% |
| MM04T | GABRG3  | gamma-aminobutyric acid (GABA) A receptor, gamma 3           | CCDS45195.1     | chr15_27725912-27725912_G_T  | 231E>X | Substitution | Nonsense             | 31% |
| MM04T | GABRQ   | gamma-aminobutyric acid (GABA) A receptor, theta             | CCDS14707.1     | chrX_151806764-151806764_C_A | 36F>L  | Substitution | Nonsynonymous coding | 29% |
| MM04T | GABRQ   | gamma-aminobutyric acid (GABA) A receptor, theta             | CCDS14707.1     | chrX_151819998-151819998_C_A | 304S>X | Substitution | Nonsense             | 31% |
| MM04T | GABRR2  | gamma-aminobutyric acid (GABA) A receptor, rho 2             | CCDS5020.2      | chr6_89967684-89967684_C_A   | 393G>V | Substitution | Nonsynonymous coding | 24% |
| MM04T | GABRR2  | gamma-aminobutyric acid (GABA) A receptor, rho 2             | CCDS5020.2      | chr6_89977482-89977482_T_G   | 243K>Q | Substitution | Nonsynonymous coding | 26% |
| MM04T | GAL3ST4 | galactose-3-O-sulfotransferase 4                             | CCDS5688.1      | chr7_99758553-99758553_G_T   | 153F>L | Substitution | Nonsynonymous coding | 48% |
| MM04T | GALNT1  | UDP-N-acetyl-alpha-D-galactosamine:polypeptide N-            | CCDS11915.1     | chr18_33243594-33243594_C_A  | 48L>I  | Substitution | Nonsynonymous coding | 29% |
| MM04T | GALNT1  | UDP-N-acetyl-alpha-D-galactosamine:polypeptide N-            | CCDS11915.1     | chr18_33243704-33243704_C_A  | 84F>L  | Substitution | Nonsynonymous coding | 34% |
| MM04T | GALNT12 | UDP-N-acetyl-alpha-D-galactosamine:polypeptide N-            | CCDS6737.1      | chr9_101594229-101594229_G_A | 303D>N | Substitution | Nonsynonymous coding | 24% |
| MM04T | GALNT13 | UDP-N-acetyl-alpha-D-galactosamine:polypeptide N-            | CCDS2199.1      | chr2_155252612-155252612_G_T | 422Q>H | Substitution | Nonsynonymous coding | 38% |
| MM04T | GALNT15 | UDP-N-acetyl-alpha-D-galactosamine:polypeptide N-            | CCDS33711.1     | chr3_16252702-16252702_C_A   | 384S>Y | Substitution | Nonsynonymous coding | 28% |
| MM04T | GALNT15 | UDP-N-acetyl-alpha-D-galactosamine:polypeptide N-            | CCDS33711.1     | chr3_16252734-16252734_G_A   | 395E>K | Substitution | Nonsynonymous coding | 29% |
| MM04T | GALNT3  | UDP-N-acetyl-alpha-D-galactosamine:polypeptide N-            | CCDS2226.1      | chr2_166621450-166621450_G_T | 211S>Y | Substitution | Nonsynonymous coding | 30% |

|       |         |                                                                                    |                 |                               |         |              |                      |     |
|-------|---------|------------------------------------------------------------------------------------|-----------------|-------------------------------|---------|--------------|----------------------|-----|
| MM04T | GALNT5  | UDP-N-acetyl-alpha-D-galactosamine:polypeptide N-                                  | CCDS2203.1      | chr2_158142583-158142583_C_A  | 560L>I  | Substitution | Nonsynonymous coding | 26% |
| MM04T | GALNT5  | UDP-N-acetyl-alpha-D-galactosamine:polypeptide N-                                  | CCDS2203.1      | chr2_158152285-158152285_G_A  | 618E>K  | Substitution | Nonsynonymous coding | 36% |
| MM04T | GALNT6  | UDP-N-acetyl-alpha-D-galactosamine:polypeptide N-                                  | CCDS8813.1      | chr12_51749712-51749712_G_A   | 545R>C  | Substitution | Nonsynonymous coding | 30% |
| MM04T | GALNT6  | UDP-N-acetyl-alpha-D-galactosamine:polypeptide N-                                  | CCDS8813.1      | chr12_51758118-51758118_A_G   | 279L>P  | Substitution | Nonsynonymous coding | 39% |
| MM04T | GALNT8  | UDP-N-acetyl-alpha-D-galactosamine:polypeptide N-                                  | CCDS8533.1      | chr12_4848451-4848451_G_A     | 211R>Q  | Substitution | Nonsynonymous coding | 34% |
| MM04T | GALNTL6 | UDP-N-acetyl-alpha-D-galactosamine:polypeptide N-                                  | CCDS34104.1     | chr4_172735776-172735776_C_A  | 15F>L   | Substitution | Nonsynonymous coding | 29% |
| MM04T | GALNTL6 | UDP-N-acetyl-alpha-D-galactosamine:polypeptide N-                                  | CCDS34104.1     | chr4_173873288-173873288_C_T  | 417A>V  | Substitution | Nonsynonymous coding | 23% |
| MM04T | GANAB   | glucosidase, alpha; neutral AB                                                     | CCDS41656.1     | chr11_62402409-62402409_C_A   | 148K>N  | Substitution | Nonsynonymous coding | 15% |
| MM04T | GANAB   | glucosidase, alpha; neutral AB                                                     | CCDS41656.1     | chr11_62407195-62407195_G_A   | 16A>V   | Substitution | Nonsynonymous coding | 28% |
| MM04T | GANC    | glucosidase, alpha; neutral C                                                      | CCDS10084.1     | chr15_42579971-42579971_G_A   | 95R>K   | Substitution | Nonsynonymous coding | 15% |
| MM04T | GART    | phosphoribosylglycinamide formyltransferase, phosphoribosylglycinamide synthetase, | CCDS13627.1     | chr21_34889771-34889771_G_T   | 616S>X  | Substitution | Nonsense             | 25% |
| MM04T | GAS2L2  | growth arrest-specific 2 like 2                                                    | CCDS11298.1     | chr17_34072695-34072695_C_A   | 607E>D  | Substitution | Nonsynonymous coding | 19% |
| MM04T | GAS2L3  | growth arrest-specific 2 like 3                                                    | CCDS9079.1      | chr12_101016096-101016096_G_A | 231R>Q  | Substitution | Nonsynonymous coding | 30% |
| MM04T | GAS2L3  | growth arrest-specific 2 like 3                                                    | CCDS9079.1      | chr12_101018661-101018661_G_A | 693R>K  | Substitution | Nonsynonymous coding | 25% |
| MM04T | GAS8    | growth arrest-specific 8                                                           | CCDS10992.1     | chr16_90097762-90097762_G_A   | 49R>Q   | Substitution | Nonsynonymous coding | 19% |
| MM04T | GATAD2A | GATA zinc finger domain containing 2A                                              | CCDS12402.2     | chr19_19606886-19606886_C_A   | 261S>Y  | Substitution | Nonsynonymous coding | 18% |
| MM04T | GATM    | glycine amidinotransferase (L-arginine:glycine amidinotransferase)                 | CCDS10122.1     | chr15_45658341-45658341_A_G   | 294I>T  | Substitution | Nonsynonymous coding | 20% |
| MM04T | GBE1    | glucan (1,4-alpha-), branching enzyme 1                                            | NM_000158       | chr3_81643160-81643160_C_A    | 336R>I  | Substitution | Nonsynonymous coding | 17% |
| MM04T | GBE1    | glucan (1,4-alpha-), branching enzyme 1                                            | NM_000158       | chr3_81754601-81754601_C_A    | 103D>Y  | Substitution | Nonsynonymous coding | 27% |
| MM04T | GBF1    | golgi brefeldin A resistant guanine nucleotide exchange factor 1                   | CCDS7533.1      | chr10_104136781-104136781_C_T | 1459L>F | Substitution | Nonsynonymous coding | 33% |
| MM04T | GBP2    | guanylate binding protein 2, interferon-inducible                                  | CCDS719.1       | chr1_89582672-89582672_C_A    | NA      | Substitution | Splice site donor    | 15% |
| MM04T | GBP5    | guanylate binding protein 5                                                        | CCDS722.1       | chr1_89729555-89729555_A_C    | 409L>R  | Substitution | Nonsynonymous coding | 22% |
| MM04T | GBP6    | guanylate binding protein family, member 6                                         | CCDS723.1       | chr1_89849675-89849675_G_A    | 498A>T  | Substitution | Nonsynonymous coding | 30% |
| MM04T | GBP7    | guanylate binding protein 7                                                        | CCDS720.1       | chr1_89613339-89613339_A_C    | 426F>V  | Substitution | Nonsynonymous coding | 23% |
| MM04T | GC      | group-specific component (vitamin D binding protein)                               | CCDS3550.1      | chr4_72631267-72631267_G_A    | 119R>X  | Substitution | Nonsense             | 32% |
| MM04T | GCC1    | GRIP and coiled-coil domain containing 1                                           | CCDS5796.1      | chr7_127224420-127224420_C_A  | 273E>X  | Substitution | Nonsense             | 24% |
| MM04T | GCDH    | glutaryl-CoA dehydrogenase                                                         | CCDS12286.1     | chr19_13008189-13008189_T_G   | 343I>M  | Substitution | Nonsynonymous coding | 33% |
| MM04T | GCLM    | glutamate-cysteine ligase, modifier subunit                                        | CCDS746.1       | chr1_94362314-94362314_C_A    | 134D>Y  | Substitution | Nonsynonymous coding | 32% |
| MM04T | GCM1    | glial cells missing homolog 1 (Drosophila)                                         | CCDS4950.1      | chr6_52993105-52993105_G_A    | 404P>S  | Substitution | Nonsynonymous coding | 28% |
| MM04T | GCNT2   | glucosaminyl (N-acetyl) transferase 2, I-branching enzyme (I blood group)          | ENST00000410107 | chr6_10509338-10509338_T_G    | 5I>S    | Substitution | Nonsynonymous coding | 16% |
| MM04T | GCNT3   | glucosaminyl (N-acetyl) transferase 3, mucin type                                  | CCDS10172.1     | chr15_59910945-59910945_G_T   | 170E>X  | Substitution | Nonsense             | 35% |
| MM04T | GCSAML  | germinal center-associated, signaling and motility-like                            | CCDS1635.1      | chr1_247712513-247712513_G_A  | 7R>Q    | Substitution | Nonsynonymous coding | 21% |

|       |            |                                                             |             |                               |         |              |                      |     |
|-------|------------|-------------------------------------------------------------|-------------|-------------------------------|---------|--------------|----------------------|-----|
| MM04T | GDAP2      | ganglioside induced differentiation associated protein 2    | CCDS897.1   | chr1_118462809-118462809_G_T  | 58L>I   | Substitution | Nonsynonymous coding | 41% |
| MM04T | GDE1       | glycerophosphodiester phosphodiesterase 1                   | CCDS10578.1 | chr16_19514812-19514812_C_A   | 326D>Y  | Substitution | Nonsynonymous coding | 26% |
| MM04T | GDPD4      | glycerophosphodiester phosphodiesterase domain containing 4 | CCDS8249.1  | chr11_76982226-76982226_C_T   | 117V>I  | Substitution | Nonsynonymous coding | 32% |
| MM04T | GEM        | GTP binding protein overexpressed in skeletal muscle        | CCDS6261.1  | chr8_95264247-95264247_C_A    | 205E>X  | Substitution | Nonsense             | 23% |
| MM04T | GEMIN4     | gem (nuclear organelle) associated protein 4                | CCDS45559.1 | chr17_649899-649899_T_C       | 462I>V  | Substitution | Nonsynonymous coding | 34% |
| MM04T | GEMIN6     | gem (nuclear organelle) associated protein 6                | CCDS1799.1  | chr2_39006163-39006163_G_T    | 11E>X   | Substitution | Nonsense             | 29% |
| MM04T | gene108171 | -                                                           | CCDS44779.1 | chr11_133790683-133790683_C_A | 979E>D  | Substitution | Nonsynonymous coding | 31% |
| MM04T | gene110258 | -                                                           | CCDS47277.1 | chr5_139231388-139231388_G_A  | 533R>C  | Substitution | Nonsynonymous coding | 29% |
| MM04T | gene110775 | -                                                           | CCDS7035.2  | chr9_140086965-140086965_G_A  | 574P>L  | Substitution | Nonsynonymous coding | 21% |
| MM04T | gene113070 | -                                                           | CCDS47498.1 | chr6_146978009-146978009_C_A  | 169L>I  | Substitution | Nonsynonymous coding | 27% |
| MM04T | gene113070 | -                                                           | CCDS47498.1 | chr6_146993556-146993556_C_A  | 347S>Y  | Substitution | Nonsynonymous coding | 18% |
| MM04T | gene113070 | -                                                           | CCDS47498.1 | chr6_147012363-147012363_C_A  | 475P>T  | Substitution | Nonsynonymous coding | 18% |
| MM04T | gene113070 | -                                                           | CCDS47498.1 | chr6_147022202-147022202_C_A  | 568S>Y  | Substitution | Nonsynonymous coding | 24% |
| MM04T | gene113070 | -                                                           | CCDS47498.1 | chr6_147105770-147105770_C_T  | 1351P>L | Substitution | Nonsynonymous coding | 26% |
| MM04T | gene113070 | -                                                           | CCDS47498.1 | chr6_147122375-147122375_C_T  | 1532R>X | Substitution | Nonsense             | 20% |
| MM04T | gene113731 | -                                                           | CCDS47500.1 | chr6_149783017-149783017_A_C  | 132F>C  | Substitution | Nonsynonymous coding | 26% |
| MM04T | gene115326 | -                                                           | CCDS48188.1 | chrX_152612761-152612761_G_T  | 206E>D  | Substitution | Nonsynonymous coding | 17% |
| MM04T | gene119844 | -                                                           | CCDS47516.1 | chr6_168369799-168369799_A_G  | 1758N>D | Substitution | Nonsynonymous coding | 29% |
| MM04T | gene121477 | -                                                           | CCDS47351.1 | chr5_176959459-176959459_G_T  | 307F>L  | Substitution | Nonsynonymous coding | 29% |
| MM04T | gene13617  | -                                                           | CCDS47950.1 | chr9_5921755-5921755_G_A      | 1414S>L | Substitution | Nonsynonymous coding | 28% |
| MM04T | gene18417  | -                                                           | CCDS47541.1 | chr7_11078432-11078432_C_T    | 676R>X  | Substitution | Nonsense             | 34% |
| MM04T | gene20083  | -                                                           | CCDS44542.1 | chr11_13031489-13031489_G_T   | 230E>D  | Substitution | Nonsynonymous coding | 24% |
| MM04T | gene21742  | -                                                           | CCDS44062.1 | chr1_15578359-15578359_G_T    | 27D>Y   | Substitution | Nonsynonymous coding | 14% |
| MM04T | gene21742  | -                                                           | CCDS44062.1 | chr1_15627867-15627867_C_T    | 282S>L  | Substitution | Nonsynonymous coding | 30% |
| MM04T | gene36146  | -                                                           | CCDS47569.1 | chr7_31015495-31015495_T_C    | 329F>S  | Substitution | Nonsynonymous coding | 33% |
| MM04T | gene37652  | -                                                           | CCDS47407.1 | chr6_32053722-32053722_G_A    | 985P>S  | Substitution | Nonsynonymous coding | 30% |
| MM04T | gene46946  | -                                                           | CCDS47423.1 | chr6_39880742-39880742_T_G    | 255K>T  | Substitution | Nonsynonymous coding | 13% |
| MM04T | gene47378  | -                                                           | CCDS46074.1 | chr19_40276356-40276356_C_T   | 30R>C   | Substitution | Nonsynonymous coding | 33% |
| MM04T | gene49600  | -                                                           | CCDS45242.1 | chr15_42281737-42281737_G_T   | 504F>L  | Substitution | Nonsynonymous coding | 17% |
| MM04T | gene49600  | -                                                           | CCDS45242.1 | chr15_42281631-42281631_G_A   | 540R>X  | Substitution | Nonsense             | 36% |
| MM04T | gene53629  | -                                                           | CCDS44574.1 | chr11_44928026-44928026_T_C   | 20I>T   | Substitution | Nonsynonymous coding | 29% |
| MM04T | gene53629  | -                                                           | CCDS44574.1 | chr11_44940825-44940825_G_T   | 132D>Y  | Substitution | Nonsynonymous coding | 16% |

|       |           |                                                                     |             |                               |         |              |                      |     |
|-------|-----------|---------------------------------------------------------------------|-------------|-------------------------------|---------|--------------|----------------------|-----|
| MM04T | gene53658 | -                                                                   | CCDS46810.1 | chr3_44975457-44975457_G_A    | 151R>W  | Substitution | Nonsynonymous coding | 25% |
| MM04T | gene66631 | -                                                                   | CCDS47441.1 | chr6_56394248-56394248_G_A    | 3746R>W | Substitution | Nonsynonymous coding | 36% |
| MM04T | gene66631 | -                                                                   | CCDS47441.1 | chr6_56418264-56418264_G_A    | 2990A>V | Substitution | Nonsynonymous coding | 34% |
| MM04T | gene66631 | -                                                                   | CCDS47441.1 | chr6_56497765-56497765_A_T    | 1198L>Q | Substitution | Nonsynonymous coding | 18% |
| MM04T | gene66631 | -                                                                   | CCDS47441.1 | chr6_56505384-56505384_C_T    | 650E>K  | Substitution | Nonsynonymous coding | 34% |
| MM04T | gene66631 | -                                                                   | CCDS47441.1 | chr6_56569164-56569164_G_A    | 231R>X  | Substitution | Nonsense             | 26% |
| MM04T | gene66761 | -                                                                   | CCDS47444.1 | chr6_56470020-56470020_T_C    | 2599N>D | Substitution | Nonsynonymous coding | 24% |
| MM04T | gene66761 | -                                                                   | CCDS47444.1 | chr6_56471108-56471108_A_G    | 2236V>A | Substitution | Nonsynonymous coding | 35% |
| MM04T | gene66761 | -                                                                   | CCDS47444.1 | chr6_56471408-56471408_C_T    | 2136G>E | Substitution | Nonsynonymous coding | 23% |
| MM04T | gene66761 | -                                                                   | CCDS47444.1 | chr6_56473377-56473377_C_A    | 1480D>Y | Substitution | Nonsynonymous coding | 21% |
| MM04T | gene87951 | -                                                                   | CCDS44706.1 | chr11_92543142-92543142_C     | NA      | Insertion    | Frameshift           | 24% |
| MM04T | gene87958 | -                                                                   | CCDS47890.1 | chr8_92213000-92213000_C_T    | 305R>X  | Substitution | Nonsense             | 34% |
| MM04T | gene90027 | -                                                                   | CCDS46363.1 | chr2_97315943-97315943_G_A    | 141A>T  | Substitution | Nonsynonymous coding | 28% |
| MM04T | gene98833 | -                                                                   | CCDS44978.1 | chr12_112620871-112620871_G_T | 3238S>X | Substitution | Nonsense             | 31% |
| MM04T | GFM1      | G elongation factor, mitochondrial 1                                | CCDS33885.1 | chr3_158371243-158371243_C_A  | 329L>I  | Substitution | Nonsynonymous coding | 25% |
| MM04T | GFRA4     | GDNF family receptor alpha 4                                        | CCDS13056.1 | chr20_3644024-3644024_G_A     | 8A>V    | Substitution | Nonsynonymous coding | 20% |
| MM04T | GGACT     | gamma-glutamylamine cyclotransferase                                | CCDS45066.1 | chr13_101184632-101184632_C_T | 72E>K   | Substitution | Nonsynonymous coding | 38% |
| MM04T | GGH       | gamma-glutamyl hydrolase (conjugase, folic polyglutamate hydrolase) | CCDS6177.1  | chr8_63951232-63951232_C_A    | 32K>N   | Substitution | Nonsynonymous coding | 24% |
| MM04T | GGN       | gametogenetin                                                       | CCDS12516.1 | chr19_38876870-38876870_G_T   | 344F>L  | Substitution | Nonsynonymous coding | 24% |
| MM04T | GGN       | gametogenetin                                                       | CCDS12516.1 | chr19_38877165-38877165_G_A   | 246T>I  | Substitution | Nonsynonymous coding | 29% |
| MM04T | GGNBP2    | gametogenetin binding protein 2                                     | CCDS11314.1 | chr17_34934591-34934591_C_T   | 274R>C  | Substitution | Nonsynonymous coding | 23% |
| MM04T | GGT5      | gamma-glutamyltransferase 5                                         | CCDS42990.1 | chr22_24628154-24628154_C_A   | 207E>X  | Substitution | Nonsense             | 38% |
| MM04T | GHITM     | growth hormone inducible transmembrane protein                      | CCDS41542.1 | chr10_85901297-85901297_C_A   | 14S>Y   | Substitution | Nonsynonymous coding | 15% |
| MM04T | GHR       | growth hormone receptor                                             | CCDS3940.1  | chr5_42699988-42699988_C_A    | 168H>N  | Substitution | Nonsynonymous coding | 31% |
| MM04T | GIMAP6    | GTPase, IMAP family member 6                                        | CCDS34778.1 | chr7_150327195-150327195_C_A  | 12E>D   | Substitution | Nonsynonymous coding | 17% |
| MM04T | GIMAP8    | GTPase, IMAP family member 8                                        | CCDS34777.1 | chr7_150164346-150164346_G_A  | 187R>H  | Substitution | Nonsynonymous coding | 19% |
| MM04T | GIN1      | gypsy retrotransposon integrase 1 [Source:HGNC Symbol;Acc:25959]    | CCDS43349.1 | chr5_102442572-102442572_G_A  | 61R>C   | Substitution | Nonsynonymous coding | 34% |
| MM04T | GINM1     | glycoprotein integral membrane 1                                    | CCDS5216.1  | chr6_149900009-149900009_T_C  | 110V>A  | Substitution | Nonsynonymous coding | 25% |
| MM04T | GJA1      | gap junction protein, alpha 1, 43kDa                                | CCDS5123.1  | chr6_121768036-121768036_C_A  | 15Q>K   | Substitution | Nonsynonymous coding | 19% |
| MM04T | GJA1      | gap junction protein, alpha 1, 43kDa                                | CCDS5123.1  | chr6_121768871-121768871_G_T  | 293R>I  | Substitution | Nonsynonymous coding | 25% |
| MM04T | GJA10     | gap junction protein, alpha 10, 62kDa                               | CCDS5025.1  | chr6_90605470-90605470_G_A    | 428R>H  | Substitution | Nonsynonymous coding | 37% |
| MM04T | GJA10     | gap junction protein, alpha 10, 62kDa                               | CCDS5025.1  | chr6_90605791-90605791_C_T    | 535S>L  | Substitution | Nonsynonymous coding | 44% |



|       |         |                                                                                                  |                 |                              |        |              |                      |     |
|-------|---------|--------------------------------------------------------------------------------------------------|-----------------|------------------------------|--------|--------------|----------------------|-----|
| MM04T | GJA9    | gap junction protein, alpha 9, 59kDa                                                             | CCDS432.1       | chr1_39340657-39340657_C_A   | 372E>X | Substitution | Nonsense             | 33% |
| MM04T | GJB5    | gap junction protein, beta 5, 31.1kDa                                                            | CCDS382.1       | chr1_35223665-35223665_C_A   | 245S>X | Substitution | Nonsense             | 32% |
| MM04T | GJC2    | gap junction protein, gamma 2, 47kDa                                                             | CCDS1569.1      | chr1_228345773-228345773_C_T | 105A>V | Substitution | Nonsynonymous coding | 35% |
| MM04T | GJD4    | gap junction protein, delta 4, 40.1kDa                                                           | CCDS7191.1      | chr10_35896538-35896538_C_T  | 33R>W  | Substitution | Nonsynonymous coding | 27% |
| MM04T | GK2     | glycerol kinase 2                                                                                | CCDS3585.1      | chr4_80327898-80327898_C_T   | 486R>Q | Substitution | Nonsynonymous coding | 34% |
| MM04T | GLDC    | glycine dehydrogenase (decarboxylating)                                                          | CCDS34987.1     | chr9_6550844-6550844_C_T     | 843R>Q | Substitution | Nonsynonymous coding | 47% |
| MM04T | GLI1    | GLI family zinc finger 1                                                                         | CCDS8940.1      | chr12_57865444-57865444_T_G  | 974F>C | Substitution | Nonsynonymous coding | 35% |
| MM04T | GLI2    | GLI family zinc finger 2                                                                         | CCDS33283.1     | chr2_121740331-121740331_C_A | 520L>M | Substitution | Nonsynonymous coding | 36% |
| MM04T | GLIS3   | GLIS family zinc finger 3                                                                        | CCDS43784.1     | chr9_3856125-3856125_G_T     | 786S>Y | Substitution | Nonsynonymous coding | 32% |
| MM04T | GLIS3   | GLIS family zinc finger 3                                                                        | CCDS43784.1     | chr9_4286331-4286331_C_T     | 32R>Q  | Substitution | Nonsynonymous coding | 21% |
| MM04T | GLRA2   | glycine receptor, alpha 2                                                                        | CCDS14160.1     | chrX_14748438-14748438_T_C   | 397L>P | Substitution | Nonsynonymous coding | 24% |
| MM04T | GLRA2   | glycine receptor, alpha 2                                                                        | CCDS14160.1     | chrX_14748472-14748472_G_T   | 408K>N | Substitution | Nonsynonymous coding | 34% |
| MM04T | GLYATL2 | glycine-N-acyltransferase-like 2                                                                 | CCDS41649.1     | chr11_58604780-58604780_T_C  | 93N>D  | Substitution | Nonsynonymous coding | 38% |
| MM04T | GMCL1   | germ cell-less, spermatogenesis associated 1                                                     | CCDS1895.1      | chr2_70064682-70064682_A_C   | 88K>N  | Substitution | Nonsynonymous coding | 59% |
| MM04T | GMD5    | GDP-mannose 4,6-dehydratase                                                                      | CCDS4474.1      | chr6_2117747-2117747_C_T     | 64R>Q  | Substitution | Nonsynonymous coding | 31% |
| MM04T | GMIP    | GEM interacting protein                                                                          | CCDS12408.1     | chr19_19745609-19745609_G_T  | 627L>I | Substitution | Nonsynonymous coding | 21% |
| MM04T | GMIP    | GEM interacting protein                                                                          | CCDS12408.1     | chr19_19747781-19747781_C_A  | 394E>D | Substitution | Nonsynonymous coding | 31% |
| MM04T | GMPR2   | guanosine monophosphate reductase 2                                                              | CCDS45087.1     | chr14_24702536-24702536_C_T  | 44S>F  | Substitution | Nonsynonymous coding | 19% |
| MM04T | GNAI2   | guanine nucleotide binding protein (G protein), alpha inhibiting activity polypeptide 2          | ENST00000422163 | chr3_50264558-50264558_G_T   | 1M>I   | Substitution | Nonsynonymous coding | 19% |
| MM04T | GNAL    | guanine nucleotide binding protein (G protein), alpha activating activity polypeptide, olfactory | CCDS11851.1     | chr18_11876666-11876666_C_A  | 403F>L | Substitution | Nonsynonymous coding | 24% |
| MM04T | GNAT2   | guanine nucleotide binding protein (G protein), alpha transducing activity polypeptide 2         | CCDS803.1       | chr1_110146617-110146617_T_G | 277K>T | Substitution | Nonsynonymous coding | 35% |
| MM04T | GNAT2   | guanine nucleotide binding protein (G protein), alpha transducing activity polypeptide 2         | CCDS803.1       | chr1_110149030-110149030_C_A | 164D>Y | Substitution | Nonsynonymous coding | 21% |
| MM04T | GNB2    | guanine nucleotide binding protein (G protein), beta polypeptide 2                               | CCDS5703.1      | chr7_100276326-100276326_G_A | 309A>T | Substitution | Nonsynonymous coding | 29% |
| MM04T | GNB4    | guanine nucleotide binding protein (G protein), beta polypeptide 4                               | CCDS3230.1      | chr3_179137294-179137294_C_A | NA     | Substitution | Splice site acceptor | 37% |
| MM04T | GNE     | glucosamine (UDP-N-acetyl)-2-epimerase/N-acetylmannosamine kinase                                | CCDS47965.1     | chr9_36227371-36227371_C_A   | 416K>N | Substitution | Nonsynonymous coding | 51% |
| MM04T | GNG11   | guanine nucleotide binding protein (G protein), gamma 11                                         | CCDS5634.1      | chr7_93555429-93555429_G_T   | 41K>N  | Substitution | Nonsynonymous coding | 28% |
| MM04T | GNL3L   | guanine nucleotide binding protein-like 3 (nucleolar)-like                                       | CCDS14360.1     | chrX_54566666-54566666_G_T   | 60K>N  | Substitution | Nonsynonymous coding | 21% |
| MM04T | GNPAT   | glyceronephosphate O-acyltransferase                                                             | CCDS1592.1      | chr1_231411898-231411898_T_C | 652F>S | Substitution | Nonsynonymous coding | 48% |
| MM04T | GNPDA2  | glucosamine-6-phosphate deaminase 2                                                              | CCDS3469.1      | chr4_44719145-44719145_C_A   | 132D>Y | Substitution | Nonsynonymous coding | 29% |
| MM04T | GNRHR   | gonadotropin-releasing hormone receptor                                                          | CCDS3517.1      | chr4_68619803-68619803_G_A   | 84T>I  | Substitution | Nonsynonymous coding | 31% |
| MM04T | GOLGA1  | golgin A1                                                                                        | CCDS6860.1      | chr9_127690532-127690532_T_G | 112T>P | Substitution | Nonsynonymous coding | 30% |
| MM04T | GOLGA2B | -                                                                                                | ENST00000397112 | chr19_22785631-22785631_G_T  | 136G>X | Substitution | Nonsense             | 25% |

|       |         |                                                                      |                 |                              |         |              |                      |     |
|-------|---------|----------------------------------------------------------------------|-----------------|------------------------------|---------|--------------|----------------------|-----|
| MM04T | GOLGA4  | golgin A4                                                            | CCDS2666.1      | chr3_37340385-37340385_G_T   | 292E>D  | Substitution | Nonsynonymous coding | 28% |
| MM04T | GOLGA4  | golgin A4                                                            | CCDS2666.1      | chr3_37381630-37381630_G_T   | 2138D>Y | Substitution | Nonsynonymous coding | 31% |
| MM04T | GOLGA5  | golgin A5                                                            | CCDS9905.1      | chr14_93263907-93263907_A_G  | 42Y>C   | Substitution | Nonsynonymous coding | 18% |
| MM04T | GOLGA5  | golgin A5                                                            | CCDS9905.1      | chr14_93299530-93299530_A_G  | 595T>A  | Substitution | Nonsynonymous coding | 22% |
| MM04T | GOLM1   | golgi membrane protein 1                                             | CCDS35054.1     | chr9_88648293-88648293_G_T   | 345L>M  | Substitution | Nonsynonymous coding | 38% |
| MM04T | GORAB   | golgin, RAB6-interacting                                             | CCDS1289.1      | chr1_170521160-170521160_C_T | 248R>W  | Substitution | Nonsynonymous coding | 29% |
| MM04T | GPAT2   | glycerol-3-phosphate acyltransferase 2, mitochondrial                | CCDS42714.1     | chr2_96690403-96690403_A_G   | 481F>L  | Substitution | Nonsynonymous coding | 22% |
| MM04T | GPATCH1 | G patch domain containing 1                                          | CCDS12428.1     | chr19_33581757-33581757_T_G  | 94F>V   | Substitution | Nonsynonymous coding | 36% |
| MM04T | GPBAR1  | G protein-coupled bile acid receptor 1                               | CCDS46515.1     | chr2_219127819-219127819_T_G | 124I>M  | Substitution | Nonsynonymous coding | 20% |
| MM04T | GPC4    | glypican 4                                                           | CCDS14637.1     | chrX_132445371-132445371_C_A | 264K>N  | Substitution | Nonsynonymous coding | 24% |
| MM04T | GPC5    | glypican 5                                                           | CCDS9468.1      | chr13_92345783-92345783_G_A  | 223R>H  | Substitution | Nonsynonymous coding | 30% |
| MM04T | GPC5    | glypican 5                                                           | CCDS9468.1      | chr13_92408643-92408643_C_T  | 417P>S  | Substitution | Nonsynonymous coding | 38% |
| MM04T | GPCPD1  | glycerophosphocholine phosphodiesterase GDE1 homolog (S. cerevisiae) | CCDS13090.1     | chr20_5566857-5566857_C_T    | 97R>Q   | Substitution | Nonsynonymous coding | 32% |
| MM04T | GPI     | glucose-6-phosphate isomerase                                        | CCDS12437.1     | chr19_34857754-34857754_G_A  | 94E>K   | Substitution | Nonsynonymous coding | 22% |
| MM04T | GPI     | glucose-6-phosphate isomerase                                        | CCDS12437.1     | chr19_34859545-34859545_G_T  | 114D>Y  | Substitution | Nonsynonymous coding | 24% |
| MM04T | GPM6A   | glycoprotein M6A                                                     | CCDS3824.1      | chr4_176561305-176561305_C_A | 220G>V  | Substitution | Nonsynonymous coding | 26% |
| MM04T | GPR110  | G protein-coupled receptor 110                                       | ENST00000283297 | chr6_46995504-46995504_A_C   | NA      | Substitution | Splice site acceptor | 35% |
| MM04T | GPR112  | G protein-coupled receptor 112                                       | CCDS35409.1     | chrX_135430677-135430677_A_C | 1604Q>H | Substitution | Nonsynonymous coding | 36% |
| MM04T | GPR112  | G protein-coupled receptor 112                                       | CCDS35409.1     | chrX_135482015-135482015_G_A | 2772R>Q | Substitution | Nonsynonymous coding | 36% |
| MM04T | GPR115  | G protein-coupled receptor 115                                       | CCDS4922.2      | chr6_47682464-47682464_G_T   | 495A>S  | Substitution | Nonsynonymous coding | 28% |
| MM04T | GPR116  | G protein-coupled receptor 116                                       | CCDS4919.1      | chr6_46828546-46828546_T_C   | 762E>G  | Substitution | Nonsynonymous coding | 26% |
| MM04T | GPR119  | G protein-coupled receptor 119                                       | CCDS14625.1     | chrX_129518951-129518951_G_T | 157F>L  | Substitution | Nonsynonymous coding | 29% |
| MM04T | GPR124  | G protein-coupled receptor 124                                       | CCDS6097.2      | chr8_37698660-37698660_T_A   | 935I>N  | Substitution | Nonsynonymous coding | 11% |
| MM04T | GPR149  | G protein-coupled receptor 149                                       | CCDS43162.1     | chr3_154146705-154146705_G_A | 234R>C  | Substitution | Nonsynonymous coding | 14% |
| MM04T | GPR153  | G protein-coupled receptor 153                                       | CCDS64.1        | chr1_6311472-6311472_C_T     | 302R>H  | Substitution | Nonsynonymous coding | 33% |
| MM04T | GPR158  | G protein-coupled receptor 158                                       | CCDS31166.1     | chr10_25888190-25888190_G_A  | 1212S>N | Substitution | Nonsynonymous coding | 30% |
| MM04T | GPR158  | G protein-coupled receptor 158                                       | CCDS31166.1     | chr10_25684861-25684861_G_T  | 344G>X  | Substitution | Nonsense             | 19% |
| MM04T | GPR158  | G protein-coupled receptor 158                                       | CCDS31166.1     | chr10_25887373-25887373_G_T  | 940E>X  | Substitution | Nonsense             | 28% |
| MM04T | GPR161  | G protein-coupled receptor 161                                       | CCDS1268.1      | chr1_168073927-168073927_C_A | 54K>N   | Substitution | Nonsynonymous coding | 35% |
| MM04T | GPR173  | G protein-coupled receptor 173                                       | CCDS14349.1     | chrX_53106905-53106905_G_T   | 368E>X  | Substitution | Nonsense             | 23% |
| MM04T | GPR179  | G protein-coupled receptor 179                                       | CCDS42308.1     | chr17_36483298-36483298_A_C  | 2052S>A | Substitution | Nonsynonymous coding | 33% |
| MM04T | GPR179  | G protein-coupled receptor 179                                       | CCDS42308.1     | chr17_36486010-36486010_C_T  | 1148D>N | Substitution | Nonsynonymous coding | 32% |

|       |         |                                                         |             |                              |         |              |                      |     |
|-------|---------|---------------------------------------------------------|-------------|------------------------------|---------|--------------|----------------------|-----|
| MM04T | GPR179  | G protein-coupled receptor 179                          | CCDS42308.1 | chr17_36491108-36491108_G_T  | 485L>M  | Substitution | Nonsynonymous coding | 15% |
| MM04T | GPR179  | G protein-coupled receptor 179                          | CCDS42308.1 | chr17_36499575-36499575_C_T  | 33R>H   | Substitution | Nonsynonymous coding | 22% |
| MM04T | GPR18   | G protein-coupled receptor 18                           | CCDS9491.1  | chr13_99907181-99907181_G_A  | 316R>X  | Substitution | Nonsense             | 11% |
| MM04T | GPR183  | G protein-coupled receptor 183                          | CCDS9492.1  | chr13_99947658-99947658_G_T  | 248L>I  | Substitution | Nonsynonymous coding | 34% |
| MM04T | GPR22   | G protein-coupled receptor 22                           | CCDS5744.1  | chr7_107115431-107115431_A_G | 309K>R  | Substitution | Nonsynonymous coding | 21% |
| MM04T | GPR25   | G protein-coupled receptor 25                           | CCDS1405.1  | chr1_200843016-200843016_C_T | 284A>V  | Substitution | Nonsynonymous coding | 32% |
| MM04T | GPR31   | G protein-coupled receptor 31                           | CCDS5299.1  | chr6_167571076-167571076_G_T | 82L>M   | Substitution | Nonsynonymous coding | 15% |
| MM04T | GPR56   | G protein-coupled receptor 56                           | CCDS32460.1 | chr16_57690154-57690154_A_C  | 345Q>P  | Substitution | Nonsynonymous coding | 21% |
| MM04T | GPR64   | G protein-coupled receptor 64                           | CCDS43923.1 | chrX_19014241-19014241_C_T   | 882A>T  | Substitution | Nonsynonymous coding | 17% |
| MM04T | GPR65   | G protein-coupled receptor 65                           | CCDS9879.1  | chr14_88477859-88477859_G_T  | 223R>I  | Substitution | Nonsynonymous coding | 33% |
| MM04T | GPR78   | G protein-coupled receptor 78                           | CCDS3403.1  | chr4_8582878-8582878_G_A     | 57A>T   | Substitution | Nonsynonymous coding | 30% |
| MM04T | GPR84   | G protein-coupled receptor 84                           | CCDS8878.1  | chr12_54756785-54756785_T_G  | 284K>T  | Substitution | Nonsynonymous coding | 35% |
| MM04T | GPR98   | G protein-coupled receptor 98                           | CCDS47246.1 | chr5_89990200-89990200_C_A   | 2543L>I | Substitution | Nonsynonymous coding | 21% |
| MM04T | GPR98   | G protein-coupled receptor 98                           | CCDS47246.1 | chr5_90055281-90055281_A_C   | 3999E>A | Substitution | Nonsynonymous coding | 23% |
| MM04T | GPR98   | G protein-coupled receptor 98                           | CCDS47246.1 | chr5_90281336-90281336_A_G   | 6050D>G | Substitution | Nonsynonymous coding | 46% |
| MM04T | GPR98   | G protein-coupled receptor 98                           | CCDS47246.1 | chr5_89924386-89924386_G_T   | 416E>X  | Substitution | Nonsense             | 35% |
| MM04T | GPR98   | G protein-coupled receptor 98                           | CCDS47246.1 | chr5_90046392-90046392_G_T   | 3667E>X | Substitution | Nonsense             | 26% |
| MM04T | GPR98   | G protein-coupled receptor 98                           | CCDS47246.1 | chr5_90087050-90087050_C_T   | 4802R>X | Substitution | Nonsense             | 36% |
| MM04T | GPRASP1 | G protein-coupled receptor associated sorting protein 1 | CCDS35352.1 | chrX_101910604-101910604_A_G | 588N>S  | Substitution | Nonsynonymous coding | 26% |
| MM04T | GPRASP1 | G protein-coupled receptor associated sorting protein 1 | CCDS35352.1 | chrX_101911100-101911100_C_A | 753F>L  | Substitution | Nonsynonymous coding | 42% |
| MM04T | GPRASP1 | G protein-coupled receptor associated sorting protein 1 | CCDS35352.1 | chrX_101912809-101912809_T_C | 1323I>T | Substitution | Nonsynonymous coding | 18% |
| MM04T | GPRASP1 | G protein-coupled receptor associated sorting protein 1 | CCDS35352.1 | chrX_101909853-101909853_G_T | 338E>X  | Substitution | Nonsense             | 18% |
| MM04T | GPRASP1 | G protein-coupled receptor associated sorting protein 1 | CCDS35352.1 | chrX_101912217-101912217_C_T | 1126R>X | Substitution | Nonsense             | 31% |
| MM04T | GPRC5C  | G protein-coupled receptor, family C, group 5, member C | CCDS11699.1 | chr17_72435928-72435928_A_C  | 50K>Q   | Substitution | Nonsynonymous coding | 10% |
| MM04T | GPRIN1  | G protein regulated inducer of neurite outgrowth 1      | CCDS4405.1  | chr5_176025989-176025989_G_T | 283L>I  | Substitution | Nonsynonymous coding | 32% |
| MM04T | GPSM1   | G-protein signaling modulator 1                         | CCDS6996.2  | chr9_139235587-139235587_C_A | 448F>L  | Substitution | Nonsynonymous coding | 22% |
| MM04T | GRAMD3  | GRAM domain containing 3                                | CCDS4136.1  | chr5_125808980-125808980_G_T | 136E>X  | Substitution | Nonsense             | 17% |
| MM04T | GRAP2   | GRB2-related adaptor protein 2                          | CCDS13999.1 | chr22_40343165-40343165_T_G  | 19F>V   | Substitution | Nonsynonymous coding | 26% |
| MM04T | GRB7    | growth factor receptor-bound protein 7                  | CCDS11345.1 | chr17_37898636-37898636_C_A  | 28P>T   | Substitution | Nonsynonymous coding | 21% |
| MM04T | GRB7    | growth factor receptor-bound protein 7                  | CCDS11345.1 | chr17_37899534-37899534_G_A  | 189E>K  | Substitution | Nonsynonymous coding | 28% |
| MM04T | GRHL1   | grainyhead-like 1 (Drosophila)                          | CCDS33144.1 | chr2_10136459-10136459_G_A   | 347R>Q  | Substitution | Nonsynonymous coding | 26% |
| MM04T | GRHL3   | grainyhead-like 3 (Drosophila)                          | CCDS251.1   | chr1_24664178-24664178_G_T   | 252E>X  | Substitution | Nonsense             | 14% |

|       |        |                                                         |             |                              |         |              |                      |     |
|-------|--------|---------------------------------------------------------|-------------|------------------------------|---------|--------------|----------------------|-----|
| MM04T | GRIA2  | glutamate receptor, ionotropic, AMPA 2                  | CCDS3797.1  | chr4_158255184-158255184_A_G | 393D>G  | Substitution | Nonsynonymous coding | 24% |
| MM04T | GRIA3  | glutamate receptor, ionotropic, AMPA 3                  | NM_000828   | chrX_122536902-122536902_A_G | 380N>D  | Substitution | Nonsynonymous coding | 23% |
| MM04T | GRID2  | glutamate receptor, ionotropic, delta 2                 | CCDS3637.1  | chr4_93225827-93225827_T_C   | 7L>P    | Substitution | Nonsynonymous coding | 38% |
| MM04T | GRIK1  | glutamate receptor, ionotropic, kainate 1               | CCDS42913.1 | chr21_30959782-30959782_C_T  | 566G>D  | Substitution | Nonsynonymous coding | 36% |
| MM04T | GRIK3  | glutamate receptor, ionotropic, kainate 3               | CCDS416.1   | chr1_37291365-37291365_G_T   | 531F>L  | Substitution | Nonsynonymous coding | 23% |
| MM04T | GRIN2A | glutamate receptor, ionotropic, N-methyl D-aspartate 2A | CCDS10539.1 | chr16_9858109-9858109_A_C    | 1098C>G | Substitution | Nonsynonymous coding | 38% |
| MM04T | GRIN2B | glutamate receptor, ionotropic, N-methyl D-aspartate 2B | CCDS8662.1  | chr12_13717012-13717012_C_T  | 1054D>N | Substitution | Nonsynonymous coding | 29% |
| MM04T | GRIN2B | glutamate receptor, ionotropic, N-methyl D-aspartate 2B | CCDS8662.1  | chr12_13717395-13717395_C_T  | 926R>Q  | Substitution | Nonsynonymous coding | 21% |
| MM04T | GRIN2B | glutamate receptor, ionotropic, N-methyl D-aspartate 2B | CCDS8662.1  | chr12_13768108-13768108_T_C  | 532T>A  | Substitution | Nonsynonymous coding | 33% |
| MM04T | GRIN2C | glutamate receptor, ionotropic, N-methyl D-aspartate 2C | CCDS32724.1 | chr17_72850914-72850914_C_A  | 106Q>H  | Substitution | Nonsynonymous coding | 32% |
| MM04T | GRIN3A | glutamate receptor, ionotropic, N-methyl-D-aspartate 3A | CCDS6758.1  | chr9_104340125-104340125_C_A | 978R>I  | Substitution | Nonsynonymous coding | 24% |
| MM04T | GRK7   | G protein-coupled receptor kinase 7                     | CCDS3120.1  | chr3_141535792-141535792_T_G | 521I>S  | Substitution | Nonsynonymous coding | 37% |
| MM04T | GRM1   | glutamate receptor, metabotropic 1                      | CCDS5209.1  | chr6_146625808-146625808_A_G | 338I>V  | Substitution | Nonsynonymous coding | 30% |
| MM04T | GRM3   | glutamate receptor, metabotropic 3                      | CCDS5600.1  | chr7_86415763-86415763_G_A   | 219E>K  | Substitution | Nonsynonymous coding | 23% |
| MM04T | GRM3   | glutamate receptor, metabotropic 3                      | CCDS5600.1  | chr7_86416261-86416261_G_A   | 385E>K  | Substitution | Nonsynonymous coding | 32% |
| MM04T | GRM5   | glutamate receptor, metabotropic 5                      | CCDS44694.1 | chr11_88583093-88583093_C_A  | 298E>X  | Substitution | Nonsense             | 17% |
| MM04T | GRM7   | glutamate receptor, metabotropic 7                      | CCDS43042.1 | chr3_7188172-7188172_G_A     | 185E>K  | Substitution | Nonsynonymous coding | 24% |
| MM04T | GRM7   | glutamate receptor, metabotropic 7                      | CCDS43042.1 | chr3_7620188-7620188_G_T     | 532R>I  | Substitution | Nonsynonymous coding | 16% |
| MM04T | GRM8   | glutamate receptor, metabotropic 8                      | CCDS47696.1 | chr7_126746696-126746696_C_T | 194R>Q  | Substitution | Nonsynonymous coding | 27% |
| MM04T | GRN    | granulin                                                | CCDS11483.1 | chr17_42427676-42427676_G_A  | 144D>N  | Substitution | Nonsynonymous coding | 23% |
| MM04T | GRPR   | gastrin-releasing peptide receptor                      | CCDS14174.1 | chrX_16142263-16142263_A_G   | 63K>E   | Substitution | Nonsynonymous coding | 30% |
| MM04T | GRXCR1 | glutaredoxin, cysteine rich 1                           | CCDS43225.1 | chr4_42964963-42964963_C_T   | 147R>C  | Substitution | Nonsynonymous coding | 28% |
| MM04T | GSDMD  | gasdermin D                                             | CCDS34956.1 | chr8_144644686-144644686_G_A | 403E>K  | Substitution | Nonsynonymous coding | 39% |
| MM04T | GSG1L  | GSG1-like                                               | CCDS45450.1 | chr16_28074612-28074612_C_T  | 45G>D   | Substitution | Nonsynonymous coding | 56% |
| MM04T | GSG2   | germ cell associated 2 (haspin)                         | CCDS11036.1 | chr17_3628966-3628966_C_A    | 579H>Q  | Substitution | Nonsynonymous coding | 11% |
| MM04T | GSK3A  | glycogen synthase kinase 3 alpha                        | CCDS12599.1 | chr19_42744209-42744209_T_G  | 123K>N  | Substitution | Nonsynonymous coding | 34% |
| MM04T | GSPT1  | G1 to S phase transition 1                              | CCDS45412.1 | chr16_11980398-11980398_G_T  | 395H>N  | Substitution | Nonsynonymous coding | 22% |
| MM04T | GSPT1  | G1 to S phase transition 1                              | CCDS45412.1 | chr16_12009375-12009375_T_C  | 68Q>R   | Substitution | Nonsynonymous coding | 21% |
| MM04T | GSPT1  | G1 to S phase transition 1                              | CCDS45412.1 | chr16_11980461-11980461_C_A  | 374E>X  | Substitution | Nonsense             | 35% |
| MM04T | GSPT2  | G1 to S phase transition 2                              | CCDS14336.1 | chrX_51488590-51488590_T_C   | 623L>S  | Substitution | Nonsynonymous coding | 34% |
| MM04T | GSTCD  | glutathione S-transferase, C-terminal domain containing | CCDS43257.1 | chr4_106640280-106640280_G_T | 164E>X  | Substitution | Nonsense             | 19% |
| MM04T | GSX2   | GS homeobox 2                                           | CCDS3494.1  | chr4_54968021-54968021_C_T   | 283R>C  | Substitution | Nonsynonymous coding | 33% |

|       |         |                                                          |                 |                               |         |              |                      |     |
|-------|---------|----------------------------------------------------------|-----------------|-------------------------------|---------|--------------|----------------------|-----|
| MM04T | GTF2H3  | general transcription factor IIH, polypeptide 3, 34kDa   | CCDS9252.1      | chr12_124130104-124130104_G_T | 66E>X   | Substitution | Nonsense             | 16% |
| MM04T | GTF3A   | general transcription factor IIIA                        | CCDS45019.1     | chr13_28004752-28004752_T_G   | 161L>R  | Substitution | Nonsynonymous coding | 40% |
| MM04T | GTF3C3  | general transcription factor IIIC, polypeptide 3, 102kDa | CCDS2316.1      | chr2_197629381-197629381_C_T  | 856R>Q  | Substitution | Nonsynonymous coding | 31% |
| MM04T | GTPBP1  | GTP binding protein 1                                    | ENST00000456823 | chr22_39130353-39130353_G_A   | 287E>K  | Substitution | Nonsynonymous coding | 25% |
| MM04T | GTPBP3  | GTP binding protein 3 (mitochondrial)                    | CCDS32950.1     | chr19_17449057-17449057_G_A   | 98W>X   | Substitution | Nonsense             | 20% |
| MM04T | GTPBP5  | GTP binding protein 5 (putative)                         | CCDS13492.1     | chr20_60775978-60775978_C_A   | 356L>M  | Substitution | Nonsynonymous coding | 11% |
| MM04T | GTPBP8  | GTP-binding protein 8 (putative)                         | CCDS33820.1     | chr3_112715818-112715818_G_T  | 216E>X  | Substitution | Nonsense             | 33% |
| MM04T | GUCA1B  | guanylate cyclase activator 1B (retina)                  | CCDS4865.1      | chr6_42162391-42162391_C_A    | 56Q>H   | Substitution | Nonsynonymous coding | 31% |
| MM04T | GUCY1B3 | guanylate cyclase 1, soluble, beta 3                     | CCDS47154.1     | chr4_156721102-156721102_G_A  | 351D>N  | Substitution | Nonsynonymous coding | 29% |
| MM04T | GUCY1B3 | guanylate cyclase 1, soluble, beta 3                     | CCDS47154.1     | chr4_156698783-156698783_G_T  | 96E>X   | Substitution | Nonsense             | 24% |
| MM04T | GUCY2F  | guanylate cyclase 2F, retinal                            | CCDS14545.1     | chrX_108625355-108625355_C_A  | 1048E>X | Substitution | Nonsense             | 30% |
| MM04T | GUF1    | GUF1 GTPase homolog (S. cerevisiae)                      | CCDS3468.1      | chr4_44684393-44684393_G_A    | 184E>K  | Substitution | Nonsynonymous coding | 30% |
| MM04T | GUF1    | GUF1 GTPase homolog (S. cerevisiae)                      | CCDS3468.1      | chr4_44688678-44688678_G_A    | 296E>K  | Substitution | Nonsynonymous coding | 20% |
| MM04T | GULP1   | GULP, engulfment adaptor PTB domain containing 1         | ENST00000451191 | chr2_189452778-189452778_C_T  | 140S>L  | Substitution | Nonsynonymous coding | 27% |
| MM04T | GUSB    | glucuronidase, beta                                      | CCDS5530.1      | chr7_65444847-65444847_C_T    | 150E>K  | Substitution | Nonsynonymous coding | 17% |
| MM04T | GXYLT1  | glucoside xylosyltransferase 1                           | CCDS41772.1     | chr12_42499642-42499642_C_T   | 281R>Q  | Substitution | Nonsynonymous coding | 25% |
| MM04T | GXYLT2  | glucoside xylosyltransferase 2                           | CCDS46870.1     | chr3_73004303-73004303_C_A    | 219L>M  | Substitution | Nonsynonymous coding | 19% |
| MM04T | GYS2    | glycogen synthase 2 (liver)                              | CCDS8690.1      | chr12_21689995-21689995_C_T   | 669D>N  | Substitution | Nonsynonymous coding | 28% |
| MM04T | GYS2    | glycogen synthase 2 (liver)                              | CCDS8690.1      | chr12_21721885-21721885_C_T   | 246R>Q  | Substitution | Nonsynonymous coding | 28% |
| MM04T | GYS2    | glycogen synthase 2 (liver)                              | CCDS8690.1      | chr12_21757463-21757463_C_A   | 22E>X   | Substitution | Nonsense             | 35% |
| MM04T | HAPLN3  | hyaluronan and proteoglycan link protein 3               | CCDS10346.1     | chr15_89424858-89424858_C_T   | 75E>K   | Substitution | Nonsynonymous coding | 22% |
| MM04T | HARBI1  | harbinger transposase derived 1                          | CCDS7920.1      | chr11_46637333-46637333_T_C   | 152H>R  | Substitution | Nonsynonymous coding | 23% |
| MM04T | HARS2   | histidyl-tRNA synthetase 2, mitochondrial                | CCDS4238.1      | chr5_140073592-140073592_A_C  | 86K>Q   | Substitution | Nonsynonymous coding | 34% |
| MM04T | HAS1    | hyaluronan synthase 1                                    | CCDS12838.1     | chr19_52219609-52219609_G_T   | 321L>I  | Substitution | Nonsynonymous coding | 26% |
| MM04T | HAS2    | hyaluronan synthase 2                                    | CCDS6335.1      | chr8_122641121-122641121_C_T  | 154E>K  | Substitution | Nonsynonymous coding | 35% |
| MM04T | HAT1    | histone acetyltransferase 1                              | CCDS2245.1      | chr2_172841226-172841226_A_C  | 318Q>H  | Substitution | Nonsynonymous coding | 40% |
| MM04T | HAUS3   | HAUS augmin-like complex, subunit 3                      | CCDS33941.1     | chr4_2241917-2241917_C_A      | 253E>X  | Substitution | Nonsense             | 39% |
| MM04T | HBP1    | HMG-box transcription factor 1                           | CCDS5741.1      | chr7_106830762-106830762_G_T  | 356S>I  | Substitution | Nonsynonymous coding | 38% |
| MM04T | HBS1L   | HBS1-like (S. cerevisiae)                                | CCDS47480.1     | chr6_135359128-135359128_T_G  | 156N>T  | Substitution | Nonsynonymous coding | 34% |
| MM04T | HCCS    | holocytochrome c synthase                                | CCDS14139.1     | chrX_11139035-11139035_C_A    | 177P>H  | Substitution | Nonsynonymous coding | 27% |
| MM04T | HCFC2   | host cell factor C2                                      | CCDS9097.1      | chr12_104474523-104474523_G_T | NA      | Substitution | Splice site acceptor | 33% |
| MM04T | HCFC2   | host cell factor C2                                      | CCDS9097.1      | chr12_104495872-104495872_G_T | 669E>X  | Substitution | Nonsense             | 29% |

|       |         |                                                                            |             |                              |         |              |                      |     |
|-------|---------|----------------------------------------------------------------------------|-------------|------------------------------|---------|--------------|----------------------|-----|
| MM04T | HCN1    | hyperpolarization activated cyclic nucleotide-gated potassium channel 1    | CCDS3952.1  | chr5_45303871-45303871_A_C   | 483F>C  | Substitution | Nonsynonymous coding | 26% |
| MM04T | HCN1    | hyperpolarization activated cyclic nucleotide-gated potassium channel 1    | CCDS3952.1  | chr5_45396619-45396619_G_T   | 402S>Y  | Substitution | Nonsynonymous coding | 35% |
| MM04T | HDAC2   | histone deacetylase 2                                                      | CCDS43493.1 | chr6_114264630-114264630_G_T | 515F>L  | Substitution | Nonsynonymous coding | 26% |
| MM04T | HDAC9   | histone deacetylase 9                                                      | CCDS47553.1 | chr7_18801793-18801793_G_A   | 686R>Q  | Substitution | Nonsynonymous coding | 23% |
| MM04T | HDC     | histidine decarboxylase                                                    | CCDS10134.1 | chr15_50555478-50555478_C_A  | 53S>I   | Substitution | Nonsynonymous coding | 20% |
| MM04T | HDLBP   | high density lipoprotein binding protein                                   | CCDS2547.1  | chr2_242179456-242179456_G_A | 751R>C  | Substitution | Nonsynonymous coding | 19% |
| MM04T | HDX     | highly divergent homeobox                                                  | CCDS35342.1 | chrX_83724090-83724090_G_T   | 214S>Y  | Substitution | Nonsynonymous coding | 26% |
| MM04T | HDX     | highly divergent homeobox                                                  | CCDS35342.1 | chrX_83723479-83723479_C_T   | NA      | Substitution | Splice site donor    | 57% |
| MM04T | HDX     | highly divergent homeobox                                                  | CCDS35342.1 | chrX_83723731-83723731_G_A   | 334R>X  | Substitution | Nonsense             | 26% |
| MM04T | HEATR1  | HEAT repeat containing 1                                                   | CCDS31066.1 | chr1_236730160-236730160_G_A | 1365S>F | Substitution | Nonsynonymous coding | 31% |
| MM04T | HEATR2  | HEAT repeat containing 2                                                   | CCDS34580.1 | chr7_814733-814733_A_G       | 725I>V  | Substitution | Nonsynonymous coding | 44% |
| MM04T | HEATR5B | HEAT repeat containing 5B                                                  | CCDS33181.1 | chr2_37217868-37217868_C_A   | 1874E>X | Substitution | Nonsense             | 32% |
| MM04T | HEATR6  | HEAT repeat containing 6                                                   | CCDS11623.1 | chr17_58143584-58143584_C_A  | 468D>Y  | Substitution | Nonsynonymous coding | 28% |
| MM04T | HECTD1  | HECT domain containing E3 ubiquitin protein ligase 1                       | CCDS41939.1 | chr14_31605847-31605847_G_A  | 1002R>W | Substitution | Nonsynonymous coding | 33% |
| MM04T | HECTD1  | HECT domain containing E3 ubiquitin protein ligase 1                       | CCDS41939.1 | chr14_31638652-31638652_T_G  | 452N>T  | Substitution | Nonsynonymous coding | 34% |
| MM04T | HECW1   | HECT, C2 and WW domain containing E3 ubiquitin protein ligase 1            | CCDS5469.2  | chr7_43495908-43495908_G_A   | 838R>Q  | Substitution | Nonsynonymous coding | 27% |
| MM04T | HECW1   | HECT, C2 and WW domain containing E3 ubiquitin protein ligase 1            | CCDS5469.2  | chr7_43519324-43519324_G_A   | 1072R>Q | Substitution | Nonsynonymous coding | 43% |
| MM04T | HECW1   | HECT, C2 and WW domain containing E3 ubiquitin protein ligase 1            | CCDS5469.2  | chr7_43547676-43547676_C_T   | 1271S>L | Substitution | Nonsynonymous coding | 15% |
| MM04T | HECW2   | HECT, C2 and WW domain containing E3 ubiquitin protein ligase 2            | CCDS33354.1 | chr2_197297945-197297945_T_C | 68Y>C   | Substitution | Nonsynonymous coding | 34% |
| MM04T | HEG1    | HEG homolog 1 (zebrafish)                                                  | CCDS46898.1 | chr3_124748066-124748066_C_T | 195A>T  | Substitution | Nonsynonymous coding | 20% |
| MM04T | HELB    | helicase (DNA) B                                                           | CCDS8976.1  | chr12_66698787-66698787_A_C  | 155K>T  | Substitution | Nonsynonymous coding | 39% |
| MM04T | HELB    | helicase (DNA) B                                                           | CCDS8976.1  | chr12_66707833-66707833_C_T  | 583S>L  | Substitution | Nonsynonymous coding | 19% |
| MM04T | HELB    | helicase (DNA) B                                                           | CCDS8976.1  | chr12_66725416-66725416_A_C  | 1051K>N | Substitution | Nonsynonymous coding | 20% |
| MM04T | HELQ    | helicase, POLQ-like                                                        | CCDS3603.1  | chr4_84352867-84352867_C_A   | 749E>X  | Substitution | Nonsense             | 18% |
| MM04T | HELZ2   | helicase with zinc finger 2, transcriptional coactivator                   | CCDS33508.1 | chr20_62192621-62192621_C_A  | 2320K>N | Substitution | Nonsynonymous coding | 31% |
| MM04T | HEMGN   | hemogen                                                                    | CCDS6731.1  | chr9_100689730-100689730_C_T | 464G>E  | Substitution | Nonsynonymous coding | 33% |
| MM04T | HEMGN   | hemogen                                                                    | CCDS6731.1  | chr9_100692770-100692770_C_A | 303E>X  | Substitution | Nonsense             | 35% |
| MM04T | HEPH    | hephaestin                                                                 | CCDS14384.2 | chrX_65423421-65423421_T_A   | NA      | Substitution | Splice site donor    | 36% |
| MM04T | HERC1   | HECT and RLD domain containing E3 ubiquitin protein ligase family member 1 | CCDS45277.1 | chr15_64067184-64067184_C_A  | 213K>N  | Substitution | Nonsynonymous coding | 24% |
| MM04T | HERC1   | HECT and RLD domain containing E3 ubiquitin protein ligase family member 1 | CCDS45277.1 | chr15_64067336-64067336_G_A  | 163R>X  | Substitution | Nonsense             | 32% |
| MM04T | HERC2   | HECT and RLD domain containing E3 ubiquitin protein ligase 2               | CCDS10021.1 | chr15_28380691-28380691_A_T  | 4055S>T | Substitution | Nonsynonymous coding | 24% |
| MM04T | HERC4   | HECT and RLD domain containing E3 ubiquitin protein ligase 4               | CCDS41533.1 | chr10_69714442-69714442_A_C  | 757F>L  | Substitution | Nonsynonymous coding | 30% |

|       |          |                                                                                           |                 |                               |         |              |                      |     |
|-------|----------|-------------------------------------------------------------------------------------------|-----------------|-------------------------------|---------|--------------|----------------------|-----|
| MM04T | HES3     | hairy and enhancer of split 3 (Drosophila)                                                | CCDS41238.1     | chr1_6305557-6305557_A_C      | 184D>A  | Substitution | Nonsynonymous coding | 28% |
| MM04T | HES6     | hairy and enhancer of split 6 (Drosophila)                                                | CCDS2527.1      | chr2_239147539-239147539_C_T  | 202D>N  | Substitution | Nonsynonymous coding | 22% |
| MM04T | HEXB     | hexosaminidase B (beta polypeptide)                                                       | CCDS4022.1      | chr5_74016520-74016520_G_T    | 521D>Y  | Substitution | Nonsynonymous coding | 34% |
| MM04T | HFM1     | HFM1, ATP-dependent DNA helicase homolog (S. cerevisiae)                                  | CCDS30769.2     | chr1_91739271-91739271_T_G    | 1257K>T | Substitution | Nonsynonymous coding | 18% |
| MM04T | HFM1     | HFM1, ATP-dependent DNA helicase homolog (S. cerevisiae)                                  | CCDS30769.2     | chr1_91843622-91843622_C_T    | 452R>Q  | Substitution | Nonsynonymous coding | 15% |
| MM04T | HFM1     | HFM1, ATP-dependent DNA helicase homolog (S. cerevisiae)                                  | CCDS30769.2     | chr1_91850783-91850783_C_T    | 255E>K  | Substitution | Nonsynonymous coding | 22% |
| MM04T | HGF      | hepatocyte growth factor (hepapoietin A; scatter factor)                                  | CCDS5597.1      | chr7_81350155-81350155_G_A    | 393R>C  | Substitution | Nonsynonymous coding | 34% |
| MM04T | HHEX     | hematopoietically expressed homeobox                                                      | CCDS7423.1      | chr10_94454401-94454401_C_A   | 230S>Y  | Substitution | Nonsynonymous coding | 30% |
| MM04T | HHIP1    | HHIP-like 1                                                                               | CCDS45162.1     | chr14_100125980-100125980_G_A | 421G>D  | Substitution | Nonsynonymous coding | 24% |
| MM04T | HHLA2    | HERV-H LTR-associating 2                                                                  | CCDS46883.1     | chr3_108072288-108072288_G_A  | 27A>T   | Substitution | Nonsynonymous coding | 14% |
| MM04T | HHLA2    | HERV-H LTR-associating 2                                                                  | CCDS46883.1     | chr3_108081216-108081216_A_G  | 344N>S  | Substitution | Nonsynonymous coding | 36% |
| MM04T | HIATL1   | hippocampus abundant transcript-like 1                                                    | CCDS6710.2      | chr9_97207300-97207300_C_A    | 189L>I  | Substitution | Nonsynonymous coding | 29% |
| MM04T | HIBADH   | 3-hydroxyisobutyrate dehydrogenase                                                        | CCDS5414.1      | chr7_27565880-27565880_C_A    | 322D>Y  | Substitution | Nonsynonymous coding | 25% |
| MM04T | HIF1A    | hypoxia inducible factor 1, alpha subunit (basic helix-loop-helix transcription factor)   | CCDS9753.1      | chr14_62199143-62199143_G_A   | 261E>K  | Substitution | Nonsynonymous coding | 26% |
| MM04T | HIF1A    | hypoxia inducible factor 1, alpha subunit (basic helix-loop-helix transcription factor)   | CCDS9753.1      | chr14_62188520-62188520_G_T   | 146E>X  | Substitution | Nonsense             | 25% |
| MM04T | HIF3A    | hypoxia inducible factor 3, alpha subunit                                                 | CCDS12681.2     | chr19_46815513-46815513_G_T   | 289S>I  | Substitution | Nonsynonymous coding | 18% |
| MM04T | HIRA     | HIR histone cell cycle regulation defective homolog A (S. cerevisiae)                     | CCDS13759.1     | chr22_19343313-19343313_G_A   | 844A>V  | Substitution | Nonsynonymous coding | 26% |
| MM04T | HIST3H3  | histone cluster 3, H3                                                                     | CCDS1572.1      | chr1_228612911-228612911_G_A  | 39P>L   | Substitution | Nonsynonymous coding | 35% |
| MM04T | HIVEP1   | human immunodeficiency virus type I enhancer binding protein 1                            | CCDS43426.1     | chr6_12122336-12122336_C_T    | 770R>W  | Substitution | Nonsynonymous coding | 20% |
| MM04T | HIVEP2   | human immunodeficiency virus type I enhancer binding protein 2                            | CCDS43510.1     | chr6_143094230-143094230_G_T  | 549S>Y  | Substitution | Nonsynonymous coding | 32% |
| MM04T | HIVEP2   | human immunodeficiency virus type I enhancer binding protein 2                            | CCDS43510.1     | chr6_143091387-143091387_G_A  | 1497R>X | Substitution | Nonsense             | 24% |
| MM04T | HIVEP3   | human immunodeficiency virus type I enhancer binding protein 3                            | CCDS463.1       | chr1_41990576-41990576_T_G    | 1738K>T | Substitution | Nonsynonymous coding | 10% |
| MM04T | HK3      | hexokinase 3 (white cell)                                                                 | CCDS4407.1      | chr5_176308744-176308744_C_T  | 781R>H  | Substitution | Nonsynonymous coding | 22% |
| MM04T | HK3      | hexokinase 3 (white cell)                                                                 | CCDS4407.1      | chr5_176314494-176314494_G_A  | 520R>C  | Substitution | Nonsynonymous coding | 36% |
| MM04T | HLA-DPB1 | major histocompatibility complex, class II, DP beta 1                                     | CCDS4765.1      | chr6_33048501-33048501_G_T    | 51Q>H   | Substitution | Nonsynonymous coding | 18% |
| MM04T | HLA-DQB2 | major histocompatibility complex, class II, DQ beta 2                                     | ENST00000435145 | chr6_32729596-32729596_C_T    | 69D>N   | Substitution | Nonsynonymous coding | 22% |
| MM04T | HLC5     | holocarboxylase synthetase (biotin-(proprionyl-CoA-carboxylase (ATP-hydrolysing)) ligase) | CCDS13647.1     | chr21_38302646-38302646_C_T   | 362E>K  | Substitution | Nonsynonymous coding | 26% |
| MM04T | HLTF     | helicase-like transcription factor                                                        | CCDS33875.1     | chr3_148781299-148781299_C_A  | 360C>F  | Substitution | Nonsynonymous coding | 26% |
| MM04T | HLX      | H2.0-like homeobox                                                                        | CCDS1527.1      | chr1_221053230-221053230_G_A  | 11A>T   | Substitution | Nonsynonymous coding | 17% |
| MM04T | HMCN1    | hemicentin 1                                                                              | CCDS30956.1     | chr1_185891543-185891543_T_G  | 311I>M  | Substitution | Nonsynonymous coding | 31% |
| MM04T | HMCN1    | hemicentin 1                                                                              | CCDS30956.1     | chr1_185892612-185892612_C_A  | 371S>Y  | Substitution | Nonsynonymous coding | 20% |
| MM04T | HMCN1    | hemicentin 1                                                                              | CCDS30956.1     | chr1_185947027-185947027_G_A  | 827R>Q  | Substitution | Nonsynonymous coding | 29% |

|       |         |                                                                                                                                    |                 |                               |         |              |                      |     |
|-------|---------|------------------------------------------------------------------------------------------------------------------------------------|-----------------|-------------------------------|---------|--------------|----------------------|-----|
| MM04T | HMCN1   | hemicentin 1                                                                                                                       | CCDS30956.1     | chr1_185953370-185953370_G_T  | 954D>Y  | Substitution | Nonsynonymous coding | 20% |
| MM04T | HMCN1   | hemicentin 1                                                                                                                       | CCDS30956.1     | chr1_185959567-185959567_C_A  | 1123F>L | Substitution | Nonsynonymous coding | 43% |
| MM04T | HMCN1   | hemicentin 1                                                                                                                       | CCDS30956.1     | chr1_186026374-186026374_A_C  | 2385S>R | Substitution | Nonsynonymous coding | 15% |
| MM04T | HMCN1   | hemicentin 1                                                                                                                       | CCDS30956.1     | chr1_186056768-186056768_G_T  | 3118K>N | Substitution | Nonsynonymous coding | 23% |
| MM04T | HMCN1   | hemicentin 1                                                                                                                       | CCDS30956.1     | chr1_186097404-186097404_C_A  | 4295F>L | Substitution | Nonsynonymous coding | 24% |
| MM04T | HMCN2   | hemicentin 2                                                                                                                       | ENST00000428715 | chr9_133302751-133302751_C_T  | 354A>V  | Substitution | Nonsynonymous coding | 21% |
| MM04T | HMGCB3  | high mobility group box 3                                                                                                          | CCDS35428.1     | chrX_150154093-150154093_G_T  | 7K>N    | Substitution | Nonsynonymous coding | 56% |
| MM04T | HMGCL   | 3-hydroxymethyl-3-methylglutaryl-CoA lyase                                                                                         | CCDS243.1       | chr1_24130918-24130918_T_C    | 283Y>C  | Substitution | Nonsynonymous coding | 26% |
| MM04T | HMGCLL1 | 3-hydroxymethyl-3-methylglutaryl-CoA lyase-like 1                                                                                  | CCDS43475.1     | chr6_55406573-55406573_G_A    | 114S>F  | Substitution | Nonsynonymous coding | 38% |
| MM04T | HMGCLL1 | 3-hydroxymethyl-3-methylglutaryl-CoA lyase-like 1                                                                                  | CCDS43475.1     | chr6_55381356-55381356_C_A    | 145G>X  | Substitution | Nonsense             | 31% |
| MM04T | HNF4G   | hepatocyte nuclear factor 4, gamma                                                                                                 | CCDS6220.2      | chr8_76459877-76459877_C_T    | 105R>X  | Substitution | Nonsense             | 32% |
| MM04T | HNRNPD  | heterogeneous nuclear ribonucleoprotein D (AU-rich element RNA binding protein 1, heterogeneous nuclear ribonucleoprotein H2 (H')) | CCDS3592.1      | chr4_83280644-83280644_C_A    | 147E>X  | Substitution | Nonsense             | 40% |
| MM04T | HNRNPH2 | heterogeneous nuclear ribonucleoprotein H2 (H')                                                                                    | ENST00000392994 | chrX_100650474-100650474_C_A  | 110S>Y  | Substitution | Nonsynonymous coding | 16% |
| MM04T | HNRNPH2 | heterogeneous nuclear ribonucleoprotein H2 (H')                                                                                    | CCDS14485.1     | chrX_100667572-100667572_G_A  | 199R>Q  | Substitution | Nonsynonymous coding | 19% |
| MM04T | HOMEZ   | homeobox and leucine zipper encoding                                                                                               | CCDS45085.1     | chr14_23745179-23745179_G_A   | 420R>W  | Substitution | Nonsynonymous coding | 31% |
| MM04T | HORMAD1 | HORMA domain containing 1                                                                                                          | CCDS967.1       | chr1_150676642-150676642_T_G  | 300E>D  | Substitution | Nonsynonymous coding | 12% |
| MM04T | HORMAD2 | HORMA domain containing 2                                                                                                          | CCDS46683.1     | chr22_30517746-30517746_T_G   | 179V>G  | Substitution | Nonsynonymous coding | 36% |
| MM04T | HOXA5   | homeobox A5                                                                                                                        | CCDS5406.1      | chr7_27181514-27181514_T_G    | 251K>N  | Substitution | Nonsynonymous coding | 42% |
| MM04T | HOXA6   | homeobox A6                                                                                                                        | CCDS5407.1      | chr7_27187364-27187364_C_A    | 2S>I    | Substitution | Nonsynonymous coding | 31% |
| MM04T | HOXA9   | homeobox A9                                                                                                                        | CCDS5409.1      | chr7_27204563-27204563_C_T    | 172E>K  | Substitution | Nonsynonymous coding | 26% |
| MM04T | HOXA9   | homeobox A9                                                                                                                        | CCDS5409.1      | chr7_27204614-27204614_T_G    | 155T>P  | Substitution | Nonsynonymous coding | 22% |
| MM04T | HOXB13  | homeobox B13                                                                                                                       | CCDS11536.1     | chr17_46805910-46805910_C_T   | 16E>K   | Substitution | Nonsynonymous coding | 20% |
| MM04T | HOXC11  | homeobox C11                                                                                                                       | CCDS8867.1      | chr12_54369028-54369028_G_A   | 249R>Q  | Substitution | Nonsynonymous coding | 24% |
| MM04T | HOXD10  | homeobox D10                                                                                                                       | CCDS2266.1      | chr2_176981935-176981935_C_T  | 125S>L  | Substitution | Nonsynonymous coding | 34% |
| MM04T | HOXD4   | homeobox D4                                                                                                                        | CCDS2269.1      | chr2_177017416-177017416_G_A  | 172E>K  | Substitution | Nonsynonymous coding | 35% |
| MM04T | HP1BP3  | heterochromatin protein 1, binding protein 3                                                                                       | CCDS30621.1     | chr1_21097473-21097473_G_T    | 202L>I  | Substitution | Nonsynonymous coding | 34% |
| MM04T | HPS3    | Hermansky-Pudlak syndrome 3                                                                                                        | CCDS3140.1      | chr3_148858918-148858918_C_A  | 276S>Y  | Substitution | Nonsynonymous coding | 20% |
| MM04T | HPS3    | Hermansky-Pudlak syndrome 3                                                                                                        | CCDS3140.1      | chr3_148880088-148880088_A_T  | 754I>F  | Substitution | Nonsynonymous coding | 22% |
| MM04T | HPS3    | Hermansky-Pudlak syndrome 3                                                                                                        | CCDS3140.1      | chr3_148885021-148885021_G_T  | 930E>D  | Substitution | Nonsynonymous coding | 20% |
| MM04T | HPSE    | heparanase                                                                                                                         | CCDS3602.1      | chr4_84240582-84240582_C_A    | 138E>D  | Substitution | Nonsynonymous coding | 19% |
| MM04T | HPSE2   | heparanase 2                                                                                                                       | CCDS7477.1      | chr10_100503657-100503657_G_T | 256S>Y  | Substitution | Nonsynonymous coding | 28% |
| MM04T | HR      | hair growth associated                                                                                                             | CCDS6022.1      | chr8_21979186-21979186_G_A    | 715P>S  | Substitution | Nonsynonymous coding | 14% |



|       |          |                                                                    |                 |                               |         |              |                      |     |
|-------|----------|--------------------------------------------------------------------|-----------------|-------------------------------|---------|--------------|----------------------|-----|
| MM04T | HRASLS2  | HRAS-like suppressor 2                                             | CCDS8046.1      | chr11_63326111-63326111_G_A   | 47A>V   | Substitution | Nonsynonymous coding | 36% |
| MM04T | HRASLS5  | HRAS-like suppressor family, member 5                              | CCDS8044.1      | chr11_63258364-63258364_T_C   | 48H>R   | Substitution | Nonsynonymous coding | 30% |
| MM04T | HRG      | histidine-rich glycoprotein                                        | CCDS3280.1      | chr3_186383945-186383945_G_A  | 42R>Q   | Substitution | Nonsynonymous coding | 41% |
| MM04T | HRH3     | histamine receptor H3                                              | CCDS13493.1     | chr20_60791356-60791356_A_C   | 348F>L  | Substitution | Nonsynonymous coding | 17% |
| MM04T | HRH3     | histamine receptor H3                                              | CCDS13493.1     | chr20_60791389-60791389_C_A   | 337M>I  | Substitution | Nonsynonymous coding | 30% |
| MM04T | HS6ST2   | heparan sulfate 6-O-sulfotransferase 2                             | CCDS48170.1     | chrX_131803228-131803228_C_T  | NA      | Substitution | Splice site acceptor | 10% |
| MM04T | HSD11B1  | hydroxysteroid (11-beta) dehydrogenase 1                           | CCDS1489.1      | chr1_209905783-209905783_A_C  | 174K>Q  | Substitution | Nonsynonymous coding | 20% |
| MM04T | HSD17B11 | hydroxysteroid (17-beta) dehydrogenase 11                          | CCDS3619.1      | chr4_88312095-88312095_C_T    | 43G>E   | Substitution | Nonsynonymous coding | 34% |
| MM04T | HSD17B6  | hydroxysteroid (17-beta) dehydrogenase 6                           | CCDS8925.1      | chr12_57178787-57178787_G_T   | 241Q>H  | Substitution | Nonsynonymous coding | 19% |
| MM04T | HSPA12A  | heat shock 70kDa protein 12A                                       | CCDS41569.1     | chr10_118440761-118440761_T_G | 310K>T  | Substitution | Nonsynonymous coding | 33% |
| MM04T | HSPA13   | heat shock protein 70kDa family, member 13                         | CCDS13567.1     | chr21_15753601-15753601_A_G   | 97Y>H   | Substitution | Nonsynonymous coding | 33% |
| MM04T | HSPA14   | heat shock 70kDa protein 14                                        | ENST00000309584 | chr10_14885802-14885802_G_A   | 243R>H  | Substitution | Nonsynonymous coding | 31% |
| MM04T | HSPA1B   | heat shock 70kDa protein 1B                                        | CCDS34415.1     | chr6_31797636-31797636_A_G    | 637I>V  | Substitution | Nonsynonymous coding | 19% |
| MM04T | HSPA1L   | heat shock 70kDa protein 1-like                                    | CCDS34413.1     | chr6_31779419-31779419_C_A    | 111G>W  | Substitution | Nonsynonymous coding | 25% |
| MM04T | HSPA6    | heat shock 70kDa protein 6 (HSP70B')                               | CCDS1231.1      | chr1_161495419-161495419_G_A  | 324R>Q  | Substitution | Nonsynonymous coding | 29% |
| MM04T | HSPBP1   | HSPA (heat shock 70kDa) binding protein, cytoplasmic cochaperone 1 | CCDS33111.1     | chr19_55790814-55790814_C_T   | 55A>T   | Substitution | Nonsynonymous coding | 32% |
| MM04T | HSPH1    | heat shock 105kDa/110kDa protein 1                                 | CCDS9340.1      | chr13_31725127-31725127_C_A   | 289E>X  | Substitution | Nonsense             | 36% |
| MM04T | HTATSF1  | HIV-1 Tat specific factor 1                                        | CCDS14657.1     | chrX_135593147-135593147_G_T  | 415E>X  | Substitution | Nonsense             | 28% |
| MM04T | HTR1D    | 5-hydroxytryptamine (serotonin) receptor 1D, G protein-coupled     | CCDS231.1       | chr1_23520183-23520183_C_T    | 177R>Q  | Substitution | Nonsynonymous coding | 34% |
| MM04T | HTR1F    | 5-hydroxytryptamine (serotonin) receptor 1F, G protein-coupled     | CCDS2920.1      | chr3_88040836-88040836_G_T    | 313E>X  | Substitution | Nonsense             | 26% |
| MM04T | HTR3A    | 5-hydroxytryptamine (serotonin) receptor 3A, ionotropic            | CCDS8366.1      | chr11_113853966-113853966_G_A | 167D>N  | Substitution | Nonsynonymous coding | 22% |
| MM04T | HTRA3    | HtrA serine peptidase 3                                            | CCDS3400.1      | chr4_8293130-8293130_G_A      | 248A>T  | Substitution | Nonsynonymous coding | 30% |
| MM04T | HTT      | huntingtin                                                         | CCDS43206.1     | chr4_3134553-3134553_C_A      | 803S>Y  | Substitution | Nonsynonymous coding | 36% |
| MM04T | HUNK     | hormonally up-regulated Neu-associated kinase                      | CCDS13610.1     | chr21_33246160-33246160_T_G   | 58V>G   | Substitution | Nonsynonymous coding | 18% |
| MM04T | HUWE1    | HECT, UBA and WWE domain containing 1, E3 ubiquitin protein ligase | CCDS35301.1     | chrX_53562429-53562429_G_A    | 4189L>F | Substitution | Nonsynonymous coding | 26% |
| MM04T | HUWE1    | HECT, UBA and WWE domain containing 1, E3 ubiquitin protein ligase | CCDS35301.1     | chrX_53613750-53613750_C_A    | 1578Q>H | Substitution | Nonsynonymous coding | 18% |
| MM04T | HUWE1    | HECT, UBA and WWE domain containing 1, E3 ubiquitin protein ligase | CCDS35301.1     | chrX_53620565-53620565_A_C    | NA      | Substitution | Splice site acceptor | 24% |
| MM04T | HYDIN    | HYDIN, axonemal central pair apparatus protein                     | CCDS42189.1     | chr16_70841545-70841545_G_T   | 5101P>T | Substitution | Nonsynonymous coding | 21% |
| MM04T | HYDIN    | HYDIN, axonemal central pair apparatus protein                     | CCDS42189.1     | chr16_70996009-70996009_T_C   | 1940T>A | Substitution | Nonsynonymous coding | 20% |
| MM04T | HYOU1    | hypoxia up-regulated 1                                             | CCDS8408.1      | chr11_118916313-118916313_C_T | 998E>K  | Substitution | Nonsynonymous coding | 24% |
| MM04T | IBTK     | inhibitor of Bruton agammaglobulinemia tyrosine kinase             | CCDS34490.1     | chr6_82924385-82924385_A_C    | 588F>C  | Substitution | Nonsynonymous coding | 30% |
| MM04T | IBTK     | inhibitor of Bruton agammaglobulinemia tyrosine kinase             | CCDS34490.1     | chr6_82927697-82927697_C_A    | 469R>I  | Substitution | Nonsynonymous coding | 32% |

|       |         |                                                              |                 |                               |        |              |                      |     |
|-------|---------|--------------------------------------------------------------|-----------------|-------------------------------|--------|--------------|----------------------|-----|
| MM04T | IBTK    | inhibitor of Bruton agammaglobulinemia tyrosine kinase       | CCDS34490.1     | chr6_82927763-82927763_C_A    | 447R>I | Substitution | Nonsynonymous coding | 39% |
| MM04T | ICA1    | islet cell autoantigen 1, 69kDa                              | ENST00000407906 | chr7_8196715-8196715_G_T      | 279L>I | Substitution | Nonsynonymous coding | 27% |
| MM04T | ICAM5   | intercellular adhesion molecule 5, telencephalin             | CCDS12233.1     | chr19_10404565-10404565_G_A   | 553E>K | Substitution | Nonsynonymous coding | 22% |
| MM04T | ICOS    | inducible T-cell co-stimulator                               | CCDS2363.1      | chr2_204822595-204822595_C_A  | 192S>Y | Substitution | Nonsynonymous coding | 33% |
| MM04T | IDE     | insulin-degrading enzyme                                     | CCDS7421.1      | chr10_94333743-94333743_C_T   | 12A>T  | Substitution | Nonsynonymous coding | 20% |
| MM04T | IDH1    | isocitrate dehydrogenase 1 (NADP+), soluble                  | CCDS2381.1      | chr2_209113362-209113362_G_A  | 49R>C  | Substitution | Nonsynonymous coding | 27% |
| MM04T | IDO1    | indoleamine 2,3-dioxygenase 1                                | CCDS47847.1     | chr8_39782263-39782263_T_G    | 227F>V | Substitution | Nonsynonymous coding | 29% |
| MM04T | IDS     | iduronate 2-sulfatase                                        | CCDS14685.1     | chrX_148564622-148564622_C_A  | 436K>N | Substitution | Nonsynonymous coding | 28% |
| MM04T | IDS     | iduronate 2-sulfatase                                        | CCDS14685.1     | chrX_148568548-148568548_A_G  | 363V>A | Substitution | Nonsynonymous coding | 23% |
| MM04T | IFI44   | interferon-induced protein 44                                | CCDS688.1       | chr1_79125147-79125147_C_T    | 331R>X | Substitution | Nonsense             | 38% |
| MM04T | IFI44L  | interferon-induced protein 44-like                           | CCDS687.2       | chr1_79107149-79107149_T_G    | 393I>M | Substitution | Nonsynonymous coding | 22% |
| MM04T | IFIH1   | interferon induced with helicase C domain 1                  | CCDS2217.1      | chr2_163174463-163174463_T_C  | 119N>D | Substitution | Nonsynonymous coding | 23% |
| MM04T | IFIT1B  | interferon-induced protein with tetratricopeptide repeats 1B | CCDS31242.1     | chr10_91143083-91143083_T_C   | 5S>P   | Substitution | Nonsynonymous coding | 35% |
| MM04T | IFIT1B  | interferon-induced protein with tetratricopeptide repeats 1B | CCDS31242.1     | chr10_91144010-91144010_G_T   | 314D>Y | Substitution | Nonsynonymous coding | 23% |
| MM04T | IFIT3   | interferon-induced protein with tetratricopeptide repeats 3  | CCDS31241.1     | chr10_91098985-91098985_C_A   | 191F>L | Substitution | Nonsynonymous coding | 25% |
| MM04T | IFIT5   | interferon-induced protein with tetratricopeptide repeats 5  | CCDS7403.1      | chr10_91177745-91177745_T_G   | 263N>K | Substitution | Nonsynonymous coding | 11% |
| MM04T | IFIT5   | interferon-induced protein with tetratricopeptide repeats 5  | CCDS7403.1      | chr10_91177764-91177764_G_A   | 270E>K | Substitution | Nonsynonymous coding | 38% |
| MM04T | IFIT5   | interferon-induced protein with tetratricopeptide repeats 5  | CCDS7403.1      | chr10_91178219-91178219_G_T   | 421K>N | Substitution | Nonsynonymous coding | 31% |
| MM04T | IFLTD1  | intermediate filament tail domain containing 1               | CCDS44849.1     | chr12_25656731-25656731_G_T   | 398S>Y | Substitution | Nonsynonymous coding | 10% |
| MM04T | IFNAR2  | interferon (alpha, beta and omega) receptor 2                | CCDS13621.1     | chr21_34625004-34625004_T_G   | 193F>C | Substitution | Nonsynonymous coding | 60% |
| MM04T | IFRD1   | interferon-related developmental regulator 1                 | CCDS34736.1     | chr7_112095898-112095898_G_A  | 59D>N  | Substitution | Nonsynonymous coding | 30% |
| MM04T | IFT122  | intraflagellar transport 122 homolog (Chlamydomonas)         | CCDS3060.1      | chr3_129196861-129196861_C_T  | 435R>W | Substitution | Nonsynonymous coding | 28% |
| MM04T | IFT140  | intraflagellar transport 140 homolog (Chlamydomonas)         | CCDS10439.1     | chr16_1639635-1639635_G_T     | 261P>T | Substitution | Nonsynonymous coding | 31% |
| MM04T | IFT172  | intraflagellar transport 172 homolog (Chlamydomonas)         | CCDS1755.1      | chr2_27682583-27682583_C_T    | 879E>K | Substitution | Nonsynonymous coding | 31% |
| MM04T | IFT172  | intraflagellar transport 172 homolog (Chlamydomonas)         | CCDS1755.1      | chr2_27688345-27688345_T_C    | 624T>A | Substitution | Nonsynonymous coding | 32% |
| MM04T | IFT172  | intraflagellar transport 172 homolog (Chlamydomonas)         | CCDS1755.1      | chr2_27688378-27688378_C_T    | 613A>T | Substitution | Nonsynonymous coding | 25% |
| MM04T | IFT80   | intraflagellar transport 80 homolog (Chlamydomonas)          | CCDS3188.1      | chr3_160099334-160099334_C_A  | 72K>N  | Substitution | Nonsynonymous coding | 37% |
| MM04T | IGBP1   | immunoglobulin (CD79A) binding protein 1                     | CCDS14396.1     | chrX_69354660-69354660_T_G    | 159I>R | Substitution | Nonsynonymous coding | 18% |
| MM04T | IGF1    | insulin-like growth factor 1 (somatomedin C)                 | CCDS44962.1     | chr12_102869478-102869478_C_T | 55G>R  | Substitution | Nonsynonymous coding | 17% |
| MM04T | IGF1    | insulin-like growth factor 1 (somatomedin C)                 | CCDS44962.1     | chr12_102874103-102874103_G_T | 19F>L  | Substitution | Nonsynonymous coding | 23% |
| MM04T | IGF2BP1 | insulin-like growth factor 2 mRNA binding protein 1          | CCDS11543.1     | chr17_47122352-47122352_G_T   | NA     | Substitution | Splice site acceptor | 40% |
| MM04T | IGF2BP2 | insulin-like growth factor 2 mRNA binding protein 2          | CCDS3273.2      | chr3_185404958-185404958_C_A  | 233E>D | Substitution | Nonsynonymous coding | 28% |

|       |          |                                                                                            |                 |                              |         |              |                      |     |
|-------|----------|--------------------------------------------------------------------------------------------|-----------------|------------------------------|---------|--------------|----------------------|-----|
| MM04T | IGLC6    | immunoglobulin lambda constant 6 (Kern+Oz-marker, gene/pseudogene)                         | ENST00000441579 | chr22_23241847-23241847_C_A  | 130L>I  | Substitution | Nonsynonymous coding | 26% |
| MM04T | IGSF1    | immunoglobulin superfamily, member 1                                                       | CCDS14629.1     | chrX_130419407-130419407_G_C | 138A>G  | Substitution | Nonsynonymous coding | 25% |
| MM04T | IGSF10   | immunoglobulin superfamily, member 10                                                      | CCDS3160.1      | chr3_151154525-151154525_C_A | 2608K>N | Substitution | Nonsynonymous coding | 19% |
| MM04T | IGSF10   | immunoglobulin superfamily, member 10                                                      | CCDS3160.1      | chr3_151171420-151171420_C_T | 156R>H  | Substitution | Nonsynonymous coding | 23% |
| MM04T | IGSF11   | immunoglobulin superfamily, member 11                                                      | CCDS46891.1     | chr3_118623613-118623613_C_A | 246A>S  | Substitution | Nonsynonymous coding | 32% |
| MM04T | IHH      | Indian hedgehog                                                                            | CCDS33380.1     | chr2_219922296-219922296_A_C | 146Y>D  | Substitution | Nonsynonymous coding | 30% |
| MM04T | IKBIP    | IKKB interacting protein                                                                   | CCDS9068.1      | chr12_99019992-99019992_G_T  | 284L>I  | Substitution | Nonsynonymous coding | 36% |
| MM04T | IKZF2    | IKAROS family zinc finger 2 (Helios)                                                       | CCDS2395.1      | chr2_213872794-213872794_G_A | 291R>X  | Substitution | Nonsense             | 51% |
| MM04T | IL12A    | interleukin 12A (natural killer cell stimulatory factor 1, cytotoxic lymphocyte maturation | CCDS3187.1      | chr3_159711381-159711381_G_T | 149K>N  | Substitution | Nonsynonymous coding | 34% |
| MM04T | IL12RB2  | interleukin 12 receptor, beta 2                                                            | CCDS638.1       | chr1_67795371-67795371_C_T   | 256R>X  | Substitution | Nonsense             | 26% |
| MM04T | IL13RA1  | interleukin 13 receptor, alpha 1                                                           | CCDS14573.1     | chrX_117880942-117880942_C_A | 85S>X   | Substitution | Nonsense             | 26% |
| MM04T | IL15     | interleukin 15                                                                             | CCDS3755.1      | chr4_142643142-142643142_A_C | 59K>T   | Substitution | Nonsynonymous coding | 26% |
| MM04T | IL17RB   | interleukin 17 receptor B                                                                  | CCDS2874.1      | chr3_53899235-53899235_A_C   | 470K>T  | Substitution | Nonsynonymous coding | 40% |
| MM04T | IL17RD   | interleukin 17 receptor D                                                                  | CCDS2880.2      | chr3_57144333-57144333_T_G   | 106E>A  | Substitution | Nonsynonymous coding | 18% |
| MM04T | IL1B     | interleukin 1, beta                                                                        | CCDS2102.1      | chr2_113593781-113593781_C_T | 9S>N    | Substitution | Nonsynonymous coding | 49% |
| MM04T | IL1R1    | interleukin 1 receptor, type I                                                             | CCDS2055.1      | chr2_102793183-102793183_G_T | 558E>D  | Substitution | Nonsynonymous coding | 18% |
| MM04T | IL1RAPL1 | interleukin 1 receptor accessory protein-like 1                                            | CCDS14218.1     | chrX_29935666-29935666_A_C   | 288K>N  | Substitution | Nonsynonymous coding | 21% |
| MM04T | IL1RAPL1 | interleukin 1 receptor accessory protein-like 1                                            | CCDS14218.1     | chrX_29973371-29973371_C_A   | 509L>I  | Substitution | Nonsynonymous coding | 34% |
| MM04T | IL1RAPL2 | interleukin 1 receptor accessory protein-like 2                                            | CCDS14517.1     | chrX_105011094-105011094_G_T | 501E>X  | Substitution | Nonsense             | 34% |
| MM04T | IL20RB   | interleukin 20 receptor beta                                                               | CCDS3093.1      | chr3_136701165-136701165_C_A | 127L>M  | Substitution | Nonsynonymous coding | 19% |
| MM04T | IL20RB   | interleukin 20 receptor beta                                                               | CCDS3093.1      | chr3_136701184-136701184_G_T | 133R>I  | Substitution | Nonsynonymous coding | 21% |
| MM04T | IL20RB   | interleukin 20 receptor beta                                                               | CCDS3093.1      | chr3_136714279-136714279_G_A | 236A>T  | Substitution | Nonsynonymous coding | 37% |
| MM04T | IL31RA   | interleukin 31 receptor A                                                                  | CCDS3970.2      | chr5_55210731-55210731_C_T   | 598A>V  | Substitution | Nonsynonymous coding | 29% |
| MM04T | IL36A    | interleukin 36, alpha                                                                      | CCDS42734.1     | chr2_113764264-113764264_C_A | 72L>I   | Substitution | Nonsynonymous coding | 33% |
| MM04T | IL36B    | interleukin 36, beta                                                                       | CCDS2110.1      | chr2_113785523-113785523_C_T | 144G>D  | Substitution | Nonsynonymous coding | 34% |
| MM04T | IL4      | interleukin 4                                                                              | CCDS4158.1      | chr5_132009858-132009858_A_T | 39N>I   | Substitution | Nonsynonymous coding | 18% |
| MM04T | IL5      | interleukin 5 (colony-stimulating factor, eosinophil)                                      | CCDS4156.1      | chr5_131877541-131877541_G_A | 123L>F  | Substitution | Nonsynonymous coding | 26% |
| MM04T | IL7      | interleukin 7                                                                              | CCDS6224.1      | chr8_79650870-79650870_C_A   | 77E>X   | Substitution | Nonsense             | 42% |
| MM04T | IL7R     | interleukin 7 receptor                                                                     | CCDS3911.1      | chr5_35857117-35857117_C_A   | 13S>Y   | Substitution | Nonsynonymous coding | 34% |
| MM04T | IL7R     | interleukin 7 receptor                                                                     | CCDS3911.1      | chr5_35871274-35871274_G_A   | 166D>N  | Substitution | Nonsynonymous coding | 37% |
| MM04T | ILF3     | interleukin enhancer binding factor 3, 90kDa                                               | CCDS45965.1     | chr19_10791772-10791772_G_T  | 345K>N  | Substitution | Nonsynonymous coding | 21% |
| MM04T | ILF3     | interleukin enhancer binding factor 3, 90kDa                                               | CCDS45965.1     | chr19_10794354-10794354_G_A  | 636E>K  | Substitution | Nonsynonymous coding | 32% |

|       |        |                                                             |                 |                              |         |              |                      |     |
|-------|--------|-------------------------------------------------------------|-----------------|------------------------------|---------|--------------|----------------------|-----|
| MM04T | IMPDH2 | IMP (inosine 5'-monophosphate) dehydrogenase 2              | CCDS2786.1      | chr3_49061827-49061827_G_A   | 512R>W  | Substitution | Nonsynonymous coding | 27% |
| MM04T | IMPG2  | interphotoreceptor matrix proteoglycan 2                    | CCDS2940.1      | chr3_100951783-100951783_A_C | 1025C>W | Substitution | Nonsynonymous coding | 29% |
| MM04T | IMPG2  | interphotoreceptor matrix proteoglycan 2                    | CCDS2940.1      | chr3_100948226-100948226_C_A | 1211E>X | Substitution | Nonsense             | 15% |
| MM04T | INADL  | InaD-like (Drosophila)                                      | CCDS617.2       | chr1_62367063-62367063_A_C   | 1105K>Q | Substitution | Nonsynonymous coding | 19% |
| MM04T | INHBC  | inhibin, beta C                                             | CCDS8938.1      | chr12_57843436-57843436_A_C  | 230K>N  | Substitution | Nonsynonymous coding | 24% |
| MM04T | INHBE  | inhibin, beta E                                             | CCDS8939.1      | chr12_57850238-57850238_G_T  | 220E>D  | Substitution | Nonsynonymous coding | 26% |
| MM04T | INMT   | indolethylamine N-methyltransferase                         | CCDS5430.1      | chr7_30791866-30791866_G_A   | 34E>K   | Substitution | Nonsynonymous coding | 31% |
| MM04T | INO80  | INO80 homolog (S. cerevisiae)                               | CCDS10071.1     | chr15_41387832-41387832_G_T  | 116F>L  | Substitution | Nonsynonymous coding | 28% |
| MM04T | INPP4B | inositol polyphosphate-4-phosphatase, type II, 105kDa       | CCDS3757.1      | chr4_143045809-143045809_C_A | 609E>X  | Substitution | Nonsense             | 27% |
| MM04T | INPP5D | inositol polyphosphate-5-phosphatase, 145kDa                | ENST00000359570 | chr2_234078674-234078674_G_A | 552R>Q  | Substitution | Nonsynonymous coding | 33% |
| MM04T | INTS1  | integrator complex subunit 1                                | CCDS47526.1     | chr7_1524745-1524745_C_T     | 1084D>N | Substitution | Nonsynonymous coding | 24% |
| MM04T | INTS10 | integrator complex subunit 10                               | CCDS6011.2      | chr8_19709289-19709289_G_T   | 702K>N  | Substitution | Nonsynonymous coding | 16% |
| MM04T | INTS5  | integrator complex subunit 5                                | CCDS8027.1      | chr11_62415457-62415457_G_A  | 699R>X  | Substitution | Nonsense             | 29% |
| MM04T | INTS6  | integrator complex subunit 6                                | CCDS9428.1      | chr13_51950259-51950259_G_T  | 552L>I  | Substitution | Nonsynonymous coding | 36% |
| MM04T | INTS7  | integrator complex subunit 7                                | CCDS1501.1      | chr1_212161258-212161258_C_T | 323A>T  | Substitution | Nonsynonymous coding | 25% |
| MM04T | INTS9  | integrator complex subunit 9                                | CCDS34873.1     | chr8_28633305-28633305_G_A   | 512R>W  | Substitution | Nonsynonymous coding | 22% |
| MM04T | INTU   | inturned planar cell polarity effector homolog (Drosophila) | CCDS34061.1     | chr4_128590200-128590200_C_A | 328L>I  | Substitution | Nonsynonymous coding | 41% |
| MM04T | INTU   | inturned planar cell polarity effector homolog (Drosophila) | CCDS34061.1     | chr4_128625420-128625420_T_G | 514I>S  | Substitution | Nonsynonymous coding | 38% |
| MM04T | IP6K3  | inositol hexakisphosphate kinase 3                          | CCDS34435.1     | chr6_33695969-33695969_G_A   | 103A>V  | Substitution | Nonsynonymous coding | 36% |
| MM04T | IPCEF1 | interaction protein for cytohesin exchange factors 1        | CCDS47509.1     | chr6_154481169-154481169_C_A | 371E>X  | Substitution | Nonsense             | 31% |
| MM04T | IPMK   | inositol polyphosphate multikinase                          | CCDS7250.1      | chr10_59986879-59986879_C_A  | 100D>Y  | Substitution | Nonsynonymous coding | 18% |
| MM04T | IPO11  | importin 11                                                 | CCDS47217.1     | chr5_61847150-61847150_A_C   | 856K>T  | Substitution | Nonsynonymous coding | 29% |
| MM04T | IPO8   | importin 8                                                  | CCDS8719.1      | chr12_30819121-30819121_C_A  | 403K>N  | Substitution | Nonsynonymous coding | 35% |
| MM04T | IQCA1  | IQ motif containing with AAA domain 1                       | CCDS46549.1     | chr2_237300959-237300959_G_T | 415F>L  | Substitution | Nonsynonymous coding | 19% |
| MM04T | IQCA1  | IQ motif containing with AAA domain 1                       | CCDS46549.1     | chr2_237240016-237240016_C_A | 787E>X  | Substitution | Nonsense             | 31% |
| MM04T | IQCF2  | IQ motif containing F2                                      | CCDS2835.1      | chr3_51897243-51897243_C_T   | 118R>X  | Substitution | Nonsense             | 30% |
| MM04T | IQCH   | IQ motif containing H                                       | CCDS32273.1     | chr15_67786690-67786690_G_A  | 986E>K  | Substitution | Nonsynonymous coding | 35% |
| MM04T | IQGAP1 | IQ motif containing GTPase activating protein 1             | CCDS10362.1     | chr15_91020020-91020020_A_C  | 970E>D  | Substitution | Nonsynonymous coding | 19% |
| MM04T | IQGAP2 | IQ motif containing GTPase activating protein 2             | CCDS34188.1     | chr5_75993845-75993845_C_T   | 1414R>X | Substitution | Nonsense             | 29% |
| MM04T | IQGAP3 | IQ motif containing GTPase activating protein 3             | CCDS1144.1      | chr1_156534445-156534445_C_A | 133K>N  | Substitution | Nonsynonymous coding | 18% |
| MM04T | IQGAP3 | IQ motif containing GTPase activating protein 3             | CCDS1144.1      | chr1_156504290-156504290_G_T | NA      | Substitution | Splice site donor    | 31% |
| MM04T | IQSEC2 | IQ motif and Sec7 domain 2                                  | CCDS48130.1     | chrX_53265519-53265519_C_A   | 1146D>Y | Substitution | Nonsynonymous coding | 33% |

|       |          |                                                                                  |                 |                              |         |              |                      |     |
|-------|----------|----------------------------------------------------------------------------------|-----------------|------------------------------|---------|--------------|----------------------|-----|
| MM04T | IQSEC2   | IQ motif and Sec7 domain 2                                                       | CCDS48130.1     | chrX_53276283-53276283_G_A   | 873R>C  | Substitution | Nonsynonymous coding | 26% |
| MM04T | IQSEC2   | IQ motif and Sec7 domain 2                                                       | CCDS48130.1     | chrX_53271070-53271070_G_A   | 971R>X  | Substitution | Nonsense             | 30% |
| MM04T | IQSEC3   | IQ motif and Sec7 domain 3 [Source:HGNC Symbol;Acc:29193]                        | CCDS31725.1     | chr12_278208-278208_A_G      | 698T>A  | Substitution | Nonsynonymous coding | 43% |
| MM04T | IQUB     | IQ motif and ubiquitin domain containing                                         | CCDS5787.1      | chr7_123104958-123104958__T  | NA      | Insertion    | Frameshift           | 27% |
| MM04T | IQUB     | IQ motif and ubiquitin domain containing                                         | CCDS5787.1      | chr7_123101420-123101420_G_T | 666F>L  | Substitution | Nonsynonymous coding | 32% |
| MM04T | IRAK1BP1 | interleukin-1 receptor-associated kinase 1 binding protein 1                     | CCDS34488.1     | chr6_79607867-79607867_C_T   | 200P>L  | Substitution | Nonsynonymous coding | 29% |
| MM04T | IRAK4    | interleukin-1 receptor-associated kinase 4                                       | CCDS8744.1      | chr12_44171469-44171469_C_A  | 251F>L  | Substitution | Nonsynonymous coding | 24% |
| MM04T | IREB2    | iron-responsive element binding protein 2                                        | CCDS10302.1     | chr15_78765700-78765700_G_A  | 334D>N  | Substitution | Nonsynonymous coding | 23% |
| MM04T | IREB2    | iron-responsive element binding protein 2                                        | CCDS10302.1     | chr15_78786378-78786378_C_A  | 818H>N  | Substitution | Nonsynonymous coding | 28% |
| MM04T | IRG1     | immunoresponsive 1 homolog (mouse)                                               | ENST00000377462 | chr13_77531795-77531795_C_A  | 374P>H  | Substitution | Nonsynonymous coding | 24% |
| MM04T | IRS4     | insulin receptor substrate 4                                                     | CCDS14544.1     | chrX_107976384-107976384_C_T | 1064R>Q | Substitution | Nonsynonymous coding | 38% |
| MM04T | IRS4     | insulin receptor substrate 4                                                     | CCDS14544.1     | chrX_107977561-107977561_C_A | 672E>X  | Substitution | Nonsense             | 24% |
| MM04T | ISG20L2  | interferon stimulated exonuclease gene 20kDa-like 2                              | CCDS1153.1      | chr1_156697303-156697303_G_A | 48P>S   | Substitution | Nonsynonymous coding | 24% |
| MM04T | ISL1     | ISL LIM homeobox 1                                                               | CCDS43314.1     | chr5_50680552-50680552_G_T   | 69R>I   | Substitution | Nonsynonymous coding | 25% |
| MM04T | ITGA1    | integrin, alpha 1                                                                | CCDS3955.1      | chr5_52221185-52221185_G_T   | 827K>N  | Substitution | Nonsynonymous coding | 26% |
| MM04T | ITGA1    | integrin, alpha 1                                                                | CCDS3955.1      | chr5_52229746-52229746_T_G   | 962S>A  | Substitution | Nonsynonymous coding | 28% |
| MM04T | ITGA2B   | integrin, alpha 2b (platelet glycoprotein IIb of IIb/IIIa complex, antigen CD41) | CCDS32665.1     | chr17_42453487-42453487_T_C  | 805D>G  | Substitution | Nonsynonymous coding | 18% |
| MM04T | ITGA5    | integrin, alpha 5 (fibronectin receptor, alpha polypeptide)                      | CCDS8880.1      | chr12_54793664-54793664_G_A  | 904S>L  | Substitution | Nonsynonymous coding | 24% |
| MM04T | ITGA6    | integrin, alpha 6                                                                | CCDS46451.1     | chr2_173352185-173352185_A_G | NA      | Substitution | Splice site donor    | 29% |
| MM04T | ITGA8    | integrin, alpha 8                                                                | CCDS31155.1     | chr10_15650284-15650284_G_T  | 520S>Y  | Substitution | Nonsynonymous coding | 28% |
| MM04T | ITGA8    | integrin, alpha 8                                                                | CCDS31155.1     | chr10_15726101-15726101_C_T  | 157R>K  | Substitution | Nonsynonymous coding | 38% |
| MM04T | ITGA8    | integrin, alpha 8                                                                | CCDS31155.1     | chr10_15649678-15649678_G_A  | 588R>X  | Substitution | Nonsense             | 21% |
| MM04T | ITGAE    | integrin, alpha E (antigen CD103, human mucosal lymphocyte antigen 1; alpha      | CCDS32531.1     | chr17_3623608-3623608_C_A    | 1109R>I | Substitution | Nonsynonymous coding | 20% |
| MM04T | ITGAM    | integrin, alpha M (complement component 3 receptor 3 subunit)                    | CCDS45470.1     | chr16_31340592-31340592_A_G  | 946N>D  | Substitution | Nonsynonymous coding | 28% |
| MM04T | ITGAX    | integrin, alpha X (complement component 3 receptor 4 subunit)                    | CCDS10711.1     | chr16_31391855-31391855_G_T  | 1062K>N | Substitution | Nonsynonymous coding | 13% |
| MM04T | ITGB1BP2 | integrin beta 1 binding protein (melusin) 2                                      | CCDS14411.1     | chrX_70524915-70524915_C_A   | 306P>H  | Substitution | Nonsynonymous coding | 32% |
| MM04T | ITGB3    | integrin, beta 3 (platelet glycoprotein IIIa, antigen CD61)                      | CCDS11511.1     | chr17_45360829-45360829_A_G  | 92D>G   | Substitution | Nonsynonymous coding | 33% |
| MM04T | ITIH1    | inter-alpha-trypsin inhibitor heavy chain 1                                      | CCDS2864.1      | chr3_52817298-52817298_G_T   | 390E>X  | Substitution | Nonsense             | 25% |
| MM04T | ITIH2    | inter-alpha-trypsin inhibitor heavy chain 2                                      | CCDS31141.1     | chr10_7762891-7762891_G_A    | 235D>N  | Substitution | Nonsynonymous coding | 20% |
| MM04T | ITIH2    | inter-alpha-trypsin inhibitor heavy chain 2                                      | CCDS31141.1     | chr10_7786917-7786917_G_A    | 858G>R  | Substitution | Nonsynonymous coding | 39% |
| MM04T | ITIH5    | inter-alpha-trypsin inhibitor heavy chain family, member 5                       | CCDS31139.1     | chr10_7682734-7682734_T_G    | 128K>N  | Substitution | Nonsynonymous coding | 19% |
| MM04T | ITIH6    | inter-alpha-trypsin inhibitor heavy chain family, member 6                       | CCDS14361.1     | chrX_54777534-54777534_C_T   | 1211R>Q | Substitution | Nonsynonymous coding | 32% |

|       |               |                                                            |                 |                              |         |              |                      |     |
|-------|---------------|------------------------------------------------------------|-----------------|------------------------------|---------|--------------|----------------------|-----|
| MM04T | ITIH6         | inter-alpha-trypsin inhibitor heavy chain family, member 6 | CCDS14361.1     | chrX_54817332-54817332_C_T   | 185G>D  | Substitution | Nonsynonymous coding | 26% |
| MM04T | ITLN1         | intelectin 1 (galactofuranose binding)                     | CCDS1211.1      | chr1_160854622-160854622_C_A | 16G>X   | Substitution | Nonsense             | 21% |
| MM04T | ITPKB         | inositol-trisphosphate 3-kinase B                          | CCDS1555.1      | chr1_226825420-226825420_C_T | 862R>Q  | Substitution | Nonsynonymous coding | 26% |
| MM04T | ITPR2         | inositol 1,4,5-trisphosphate receptor, type 2              | CCDS41764.1     | chr12_26752221-26752221_C_T  | 1287E>K | Substitution | Nonsynonymous coding | 33% |
| MM04T | ITPR2         | inositol 1,4,5-trisphosphate receptor, type 2              | CCDS41764.1     | chr12_26875412-26875412_C_T  | 148R>H  | Substitution | Nonsynonymous coding | 20% |
| MM04T | ITSN1         | intersectin 1 (SH3 domain protein)                         | CCDS33545.1     | chr21_35258737-35258737_T_C  | 1664F>L | Substitution | Nonsynonymous coding | 19% |
| MM04T | IVNS1ABP      | influenza virus NS1A binding protein                       | CCDS1368.1      | chr1_185269172-185269172_G_T | 487P>H  | Substitution | Nonsynonymous coding | 23% |
| MM04T | IVNS1ABP      | influenza virus NS1A binding protein                       | CCDS1368.1      | chr1_185269663-185269663_C_T | 383R>Q  | Substitution | Nonsynonymous coding | 33% |
| MM04T | IYD           | iodotyrosine deiodinase                                    | CCDS5227.1      | chr6_150715251-150715251_G_T | 183E>X  | Substitution | Nonsense             | 30% |
| MM04T | IZUMO1        | izumo sperm-egg fusion 1                                   | CCDS12732.1     | chr19_49248938-49248938_G_A  | 60A>V   | Substitution | Nonsynonymous coding | 30% |
| MM04T | IZUMO3        | IZUMO family member 3                                      | ENST00000380098 | chr9_24544986-24544986_C_A   | 67K>N   | Substitution | Nonsynonymous coding | 35% |
| MM04T | JAK1          | Janus kinase 1                                             | CCDS41346.1     | chr1_65309779-65309779_C_T   | 791E>K  | Substitution | Nonsynonymous coding | 24% |
| MM04T | JAK1          | Janus kinase 1                                             | CCDS41346.1     | chr1_65325843-65325843_C_T   | 427V>M  | Substitution | Nonsynonymous coding | 20% |
| MM04T | JAK1          | Janus kinase 1                                             | CCDS41346.1     | chr1_65332689-65332689_C_A   | 284E>X  | Substitution | Nonsense             | 27% |
| MM04T | JAK1          | Janus kinase 1                                             | CCDS41346.1     | chr1_65349005-65349005_C_A   | 54E>X   | Substitution | Nonsense             | 22% |
| MM04T | JAK2          | Janus kinase 2                                             | CCDS6457.1      | chr9_5050746-5050746_G_T     | 177E>X  | Substitution | Nonsense             | 37% |
| MM04T | JAK3          | Janus kinase 3                                             | CCDS12366.1     | chr19_17942524-17942524_C_T  | 922D>N  | Substitution | Nonsynonymous coding | 36% |
| MM04T | JAKMIP2       | janus kinase and microtubule interacting protein 2         | CCDS4285.1      | chr5_147040702-147040702_C_A | 146D>Y  | Substitution | Nonsynonymous coding | 25% |
| MM04T | JARID2        | jumonji, AT rich interactive domain 2                      | CCDS4533.1      | chr6_15501441-15501441_C_A   | 750P>H  | Substitution | Nonsynonymous coding | 23% |
| MM04T | JARID2        | jumonji, AT rich interactive domain 2                      | CCDS4533.1      | chr6_15504823-15504823_G_T   | 847E>D  | Substitution | Nonsynonymous coding | 31% |
| MM04T | JARID2        | jumonji, AT rich interactive domain 2                      | CCDS4533.1      | chr6_15520412-15520412_C_T   | 1224A>V | Substitution | Nonsynonymous coding | 31% |
| MM04T | JMJD1C        | jumonji domain containing 1C                               | CCDS41532.1     | chr10_64979716-64979716_G_T  | 159L>I  | Substitution | Nonsynonymous coding | 28% |
| MM04T | JMJD7-PLA2G4B | JMJD7-PLA2G4B readthrough                                  | CCDS32202.1     | chr15_42133280-42133280_C_T  | 358R>C  | Substitution | Nonsynonymous coding | 16% |
| MM04T | JMY           | junction mediating and regulatory protein, p53 cofactor    | CCDS4047.3      | chr5_78533257-78533257_G_T   | 262E>X  | Substitution | Nonsense             | 22% |
| MM04T | JPH2          | junctophilin 2                                             | CCDS13325.1     | chr20_42744983-42744983_C_A  | 444E>D  | Substitution | Nonsynonymous coding | 13% |
| MM04T | JSRP1         | junctional sarcoplasmic reticulum protein 1                | CCDS12086.1     | chr19_2252725-2252725_T_G    | 200K>T  | Substitution | Nonsynonymous coding | 28% |
| MM04T | KAL1          | Kallmann syndrome 1 sequence                               | CCDS14130.1     | chrX_8553424-8553424_C_T     | 247R>Q  | Substitution | Nonsynonymous coding | 29% |
| MM04T | KALRN         | kalirin, RhoGEF kinase                                     | CCDS3027.1      | chr3_124175535-124175535_G_A | 1270E>K | Substitution | Nonsynonymous coding | 16% |
| MM04T | KANK1         | KN motif and ankyrin repeat domains 1                      | CCDS34976.1     | chr9_712132-712132_G_T       | 456E>X  | Substitution | Nonsense             | 32% |
| MM04T | KANK2         | KN motif and ankyrin repeat domains 2                      | CCDS12255.1     | chr19_11283743-11283743_C_T  | 709A>T  | Substitution | Nonsynonymous coding | 18% |
| MM04T | KANK3         | KN motif and ankyrin repeat domains 3                      | CCDS12199.1     | chr19_8399715-8399715_C_A    | 332E>D  | Substitution | Nonsynonymous coding | 30% |
| MM04T | KANK4         | KN motif and ankyrin repeat domains 4                      | CCDS620.1       | chr1_62739626-62739626_T_G   | 384I>L  | Substitution | Nonsynonymous coding | 34% |

|       |         |                                                                                       |             |                               |         |              |                      |     |
|-------|---------|---------------------------------------------------------------------------------------|-------------|-------------------------------|---------|--------------|----------------------|-----|
| MM04T | KANK4   | KN motif and ankyrin repeat domains 4                                                 | CCDS620.1   | chr1_62740615-62740615_C_A    | 54R>I   | Substitution | Nonsynonymous coding | 22% |
| MM04T | KANSL1L | KAT8 regulatory NSL complex subunit 1-like                                            | CCDS33370.1 | chr2_210888782-210888782_G_T  | 903S>Y  | Substitution | Nonsynonymous coding | 35% |
| MM04T | KAT2B   | K(lysine) acetyltransferase 2B                                                        | CCDS2634.1  | chr3_20189940-20189940_G_A    | 756E>K  | Substitution | Nonsynonymous coding | 19% |
| MM04T | KAT6A   | K(lysine) acetyltransferase 6A                                                        | CCDS6124.1  | chr8_41791026-41791026_G_A    | 1571S>F | Substitution | Nonsynonymous coding | 30% |
| MM04T | KAT6A   | K(lysine) acetyltransferase 6A                                                        | CCDS6124.1  | chr8_41798947-41798947_A_G    | 818S>P  | Substitution | Nonsynonymous coding | 38% |
| MM04T | KATNAL1 | katanin p60 subunit A-like 1                                                          | CCDS31956.1 | chr13_30784555-30784555_T_G   | 391K>T  | Substitution | Nonsynonymous coding | 22% |
| MM04T | KBTBD3  | kelch repeat and BTB (POZ) domain containing 3                                        | CCDS8334.1  | chr11_105924202-105924202_A_C | 405L>X  | Substitution | Nonsense             | 36% |
| MM04T | KBTBD7  | kelch repeat and BTB (POZ) domain containing 7                                        | CCDS9377.1  | chr13_41766628-41766628_T_C   | 589D>G  | Substitution | Nonsynonymous coding | 10% |
| MM04T | KCNA1   | potassium voltage-gated channel, shaker-related subfamily, member 1 (episodic ataxia) | CCDS8535.1  | chr12_5020952-5020952_C_A     | 136F>L  | Substitution | Nonsynonymous coding | 30% |
| MM04T | KCNA10  | potassium voltage-gated channel, shaker-related subfamily, member 10                  | CCDS826.1   | chr1_111060030-111060030_G_T  | 460F>L  | Substitution | Nonsynonymous coding | 32% |
| MM04T | KCNA4   | potassium voltage-gated channel, shaker-related subfamily, member 4                   | CCDS41629.1 | chr11_30033950-30033950_C_A   | 92K>N   | Substitution | Nonsynonymous coding | 31% |
| MM04T | KCNA5   | potassium voltage-gated channel, shaker-related subfamily, member 5                   | CCDS8536.1  | chr12_5153479-5153479_G_A     | 56A>T   | Substitution | Nonsynonymous coding | 12% |
| MM04T | KCNA6   | potassium voltage-gated channel, shaker-related subfamily, member 6                   | CCDS8534.1  | chr12_4920318-4920318_G_A     | 371A>T  | Substitution | Nonsynonymous coding | 39% |
| MM04T | KCNAB1  | potassium voltage-gated channel, shaker-related subfamily, beta member 1              | CCDS3174.1  | chr3_156232899-156232899_C_A  | 252S>Y  | Substitution | Nonsynonymous coding | 30% |
| MM04T | KCNAB2  | potassium voltage-gated channel, shaker-related subfamily, beta member 2              | CCDS55.1    | chr1_6156802-6156802_C_T      | 304P>L  | Substitution | Nonsynonymous coding | 23% |
| MM04T | KCNAB3  | potassium voltage-gated channel, shaker-related subfamily, beta member 3              | CCDS11124.1 | chr17_7826850-7826850_C_T     | 354R>H  | Substitution | Nonsynonymous coding | 26% |
| MM04T | KCNB1   | potassium voltage-gated channel, Shab-related subfamily, member 1                     | CCDS13418.1 | chr20_48098719-48098719_C_A   | 100R>L  | Substitution | Nonsynonymous coding | 19% |
| MM04T | KCND1   | potassium voltage-gated channel, Shal-related subfamily, member 1                     | CCDS14314.1 | chrX_48819857-48819857_C_A    | 643K>N  | Substitution | Nonsynonymous coding | 26% |
| MM04T | KCND1   | potassium voltage-gated channel, Shal-related subfamily, member 1                     | CCDS14314.1 | chrX_48826006-48826006_C_T    | 225E>K  | Substitution | Nonsynonymous coding | 38% |
| MM04T | KCND3   | potassium voltage-gated channel, Shal-related subfamily, member 3                     | CCDS843.1   | chr1_112524582-112524582_C_T  | 256R>H  | Substitution | Nonsynonymous coding | 37% |
| MM04T | KCND3   | potassium voltage-gated channel, Shal-related subfamily, member 3                     | CCDS843.1   | chr1_112321054-112321054_A_G  | NA      | Substitution | Splice site donor    | 30% |
| MM04T | KCNG1   | potassium voltage-gated channel, subfamily G, member 1                                | CCDS13436.1 | chr20_49626817-49626817_G_A   | 20S>L   | Substitution | Nonsynonymous coding | 36% |
| MM04T | KCNH1   | potassium voltage-gated channel, subfamily H (eag-related), member 1                  | CCDS1496.1  | chr1_211093357-211093357_G_A  | 363R>X  | Substitution | Nonsense             | 31% |
| MM04T | KCNH2   | potassium voltage-gated channel, subfamily H (eag-related), member 2                  | CCDS5910.1  | chr7_150648025-150648025_C_T  | 710G>D  | Substitution | Nonsynonymous coding | 25% |
| MM04T | KCNH6   | potassium voltage-gated channel, subfamily H (eag-related), member 6                  | CCDS11638.1 | chr17_61611277-61611277_G_A   | 236E>K  | Substitution | Nonsynonymous coding | 32% |
| MM04T | KCNH7   | potassium voltage-gated channel, subfamily H (eag-related), member 7                  | CCDS2219.1  | chr2_163695019-163695019_G_A  | 4R>C    | Substitution | Nonsynonymous coding | 32% |
| MM04T | KCNH8   | potassium voltage-gated channel, subfamily H (eag-related), member 8                  | CCDS2632.1  | chr3_19575403-19575403_C_A    | 1046L>I | Substitution | Nonsynonymous coding | 40% |
| MM04T | KCNIP1  | Kv channel interacting protein 1                                                      | CCDS34286.1 | chr5_170147349-170147349_G_A  | 82E>K   | Substitution | Nonsynonymous coding | 30% |
| MM04T | KCNIP1  | Kv channel interacting protein 1                                                      | CCDS34286.1 | chr5_170148857-170148857_T_G  | 104Y>D  | Substitution | Nonsynonymous coding | 29% |
| MM04T | KCNIP1  | Kv channel interacting protein 1                                                      | CCDS34286.1 | chr5_170160885-170160885_C_A  | 207L>I  | Substitution | Nonsynonymous coding | 28% |
| MM04T | KCNJ12  | potassium inwardly-rectifying channel, subfamily J, member 12                         | CCDS11219.1 | chr17_21318731-21318731_C_T   | 26S>L   | Substitution | Nonsynonymous coding | 11% |
| MM04T | KCNJ15  | potassium inwardly-rectifying channel, subfamily J, member 15                         | CCDS13656.1 | chr21_39671299-39671299_G_T   | 39R>I   | Substitution | Nonsynonymous coding | 27% |

|       |          |                                                                                  |                 |                               |         |              |                      |     |
|-------|----------|----------------------------------------------------------------------------------|-----------------|-------------------------------|---------|--------------|----------------------|-----|
| MM04T | KCNJ15   | potassium inwardly-rectifying channel, subfamily J, member 15                    | CCDS13656.1     | chr21_39672057-39672057_G_A   | 292A>T  | Substitution | Nonsynonymous coding | 33% |
| MM04T | KCNJ16   | potassium inwardly-rectifying channel, subfamily J, member 16                    | CCDS11687.1     | chr17_68128865-68128865_G_A   | 213E>K  | Substitution | Nonsynonymous coding | 29% |
| MM04T | KCNJ2    | potassium inwardly-rectifying channel, subfamily J, member 2                     | CCDS11688.1     | chr17_68172272-68172272_G_T   | 364K>N  | Substitution | Nonsynonymous coding | 32% |
| MM04T | KCNJ5    | potassium inwardly-rectifying channel, subfamily J, member 5                     | CCDS8479.1      | chr11_128781240-128781240_G_T | 24K>N   | Substitution | Nonsynonymous coding | 18% |
| MM04T | KCNK13   | potassium channel, subfamily K, member 13                                        | CCDS9889.1      | chr14_90650596-90650596_C_T   | 159S>L  | Substitution | Nonsynonymous coding | 22% |
| MM04T | KCNK7    | potassium channel, subfamily K, member 7                                         | CCDS31608.1     | chr11_65361243-65361243_C_T   | 141R>H  | Substitution | Nonsynonymous coding | 20% |
| MM04T | KCNMA1   | potassium large conductance calcium-activated channel, subfamily M, alpha member | CCDS7352.1      | chr10_78704623-78704623_G_A   | 879S>L  | Substitution | Nonsynonymous coding | 31% |
| MM04T | KCNMB4   | potassium large conductance calcium-activated channel, subfamily M, beta member  | CCDS8997.1      | chr12_70794030-70794030_T_G   | 126N>K  | Substitution | Nonsynonymous coding | 21% |
| MM04T | KCNQ2    | potassium voltage-gated channel, KQT-like subfamily, member 2                    | CCDS13520.1     | chr20_62059751-62059751_T_A   | 396N>Y  | Substitution | Nonsynonymous coding | 40% |
| MM04T | KCNQ2    | potassium voltage-gated channel, KQT-like subfamily, member 2                    | CCDS13520.1     | chr20_62070074-62070074_C_A   | NA      | Substitution | Splice site acceptor | 34% |
| MM04T | KCNS3    | potassium voltage-gated channel, delayed-rectifier, subfamily S, member 3        | CCDS1692.1      | chr2_18113019-18113019_G_T    | 248K>N  | Substitution | Nonsynonymous coding | 29% |
| MM04T | KCNS3    | potassium voltage-gated channel, delayed-rectifier, subfamily S, member 3        | CCDS1692.1      | chr2_18113695-18113695_G_T    | 474E>X  | Substitution | Nonsense             | 33% |
| MM04T | KCNT2    | potassium channel, subfamily T, member 2                                         | CCDS1384.1      | chr1_196250075-196250075_C_A  | 942R>I  | Substitution | Nonsynonymous coding | 21% |
| MM04T | KCTD16   | potassium channel tetramerisation domain containing 16                           | CCDS34260.1     | chr5_143853255-143853255_G_A  | 289D>N  | Substitution | Nonsynonymous coding | 14% |
| MM04T | KCTD17   | potassium channel tetramerisation domain containing 17                           | CCDS13940.2     | chr22_37457600-37457600_G_T   | 252R>I  | Substitution | Nonsynonymous coding | 31% |
| MM04T | KCTD18   | potassium channel tetramerisation domain containing 18                           | CCDS2330.1      | chr2_201363707-201363707_C_A  | 158R>I  | Substitution | Nonsynonymous coding | 35% |
| MM04T | KCTD21   | potassium channel tetramerisation domain containing 21                           | CCDS31645.1     | chr11_77885516-77885516_G_T   | 29L>I   | Substitution | Nonsynonymous coding | 11% |
| MM04T | KCTD3    | potassium channel tetramerisation domain containing 3                            | CCDS1515.1      | chr1_215777597-215777597_G_A  | 421R>Q  | Substitution | Nonsynonymous coding | 31% |
| MM04T | KCTD3    | potassium channel tetramerisation domain containing 3                            | CCDS1515.1      | chr1_215749304-215749304_G_T  | 82E>X   | Substitution | Nonsense             | 52% |
| MM04T | KCTD8    | potassium channel tetramerisation domain containing 8                            | CCDS3467.1      | chr4_44449619-44449619_C_T    | 308D>N  | Substitution | Nonsynonymous coding | 23% |
| MM04T | KDM1B    | lysine (K)-specific demethylase 1B                                               | ENST00000388870 | chr6_18205779-18205779_G_T    | 515E>X  | Substitution | Nonsense             | 16% |
| MM04T | KDM3A    | lysine (K)-specific demethylase 3A                                               | CCDS1990.1      | chr2_86709598-86709598_G_T    | 901K>N  | Substitution | Nonsynonymous coding | 43% |
| MM04T | KDM5A    | lysine (K)-specific demethylase 5A                                               | CCDS41736.1     | chr12_406218-406218_C_A       | 1408S>I | Substitution | Nonsynonymous coding | 36% |
| MM04T | KDM5B    | lysine (K)-specific demethylase 5B                                               | CCDS30974.1     | chr1_202715432-202715432_C_A  | 679R>I  | Substitution | Nonsynonymous coding | 28% |
| MM04T | KDM6A    | lysine (K)-specific demethylase 6A                                               | CCDS14265.1     | chrX_44918695-44918695_G_A    | 393R>Q  | Substitution | Nonsynonymous coding | 29% |
| MM04T | KDM6B    | lysine (K)-specific demethylase 6B                                               | CCDS32552.1     | chr17_7753439-7753439_C_T     | 1206T>I | Substitution | Nonsynonymous coding | 31% |
| MM04T | KDR      | kinase insert domain receptor (a type III receptor tyrosine kinase)              | CCDS3497.1      | chr4_55972888-55972888_T_G    | 501K>T  | Substitution | Nonsynonymous coding | 31% |
| MM04T | KHDRBS2  | KH domain containing, RNA binding, signal transduction associated 2              | CCDS4963.1      | chr6_62442631-62442631_C_A    | 283Q>H  | Substitution | Nonsynonymous coding | 19% |
| MM04T | KHDRBS2  | KH domain containing, RNA binding, signal transduction associated 2              | CCDS4963.1      | chr6_62611243-62611243_G_A    | 173R>C  | Substitution | Nonsynonymous coding | 33% |
| MM04T | KIAA0020 | KIAA0020                                                                         | CCDS6448.2      | chr9_2827069-2827069_T_G      | NA      | Substitution | Splice site donor    | 38% |
| MM04T | KIAA0146 | KIAA0146                                                                         | CCDS43737.1     | chr8_48511686-48511686_C_A    | 491S>Y  | Substitution | Nonsynonymous coding | 28% |
| MM04T | KIAA0146 | KIAA0146                                                                         | CCDS43737.1     | chr8_48192563-48192563_G_A    | 49W>X   | Substitution | Nonsense             | 35% |



|       |           |               |             |                               |         |              |                      |     |
|-------|-----------|---------------|-------------|-------------------------------|---------|--------------|----------------------|-----|
| MM04T | KIAA0232  | KIAA0232      | CCDS43209.1 | chr4_6862882-6862882_A_C      | 258K>T  | Substitution | Nonsynonymous coding | 19% |
| MM04T | KIAA0232  | KIAA0232      | CCDS43209.1 | chr4_6863077-6863077_G_A      | 323R>Q  | Substitution | Nonsynonymous coding | 32% |
| MM04T | KIAA0319L | KIAA0319-like | CCDS390.1   | chr1_35926039-35926039_C_A    | NA      | Substitution | Splice site acceptor | 22% |
| MM04T | KIAA0368  | KIAA0368      | CCDS48006.1 | chr9_114206746-114206746_T_G  | 239K>T  | Substitution | Nonsynonymous coding | 25% |
| MM04T | KIAA0495  | -             | NM_207306   | chr1_3662662-3662662_G_T      | 36L>I   | Substitution | Nonsynonymous coding | 32% |
| MM04T | KIAA0586  | KIAA0586      | CCDS45115.1 | chr14_58909588-58909588_C_T   | 192P>L  | Substitution | Nonsynonymous coding | 30% |
| MM04T | KIAA0825  | KIAA0825      | CCDS4070.1  | chr5_93856154-93856154_C_A    | 257E>X  | Substitution | Nonsense             | 20% |
| MM04T | KIAA0895  | KIAA0895      | CCDS43570.1 | chr7_36373756-36373756_G_A    | 339R>X  | Substitution | Nonsense             | 32% |
| MM04T | KIAA0947  | KIAA0947      | CCDS47187.1 | chr5_5447846-5447846_G_A      | 174E>K  | Substitution | Nonsynonymous coding | 44% |
| MM04T | KIAA0947  | KIAA0947      | CCDS47187.1 | chr5_5464492-5464492_C_A      | 1682S>Y | Substitution | Nonsynonymous coding | 32% |
| MM04T | KIAA1009  | KIAA1009      | CCDS34494.2 | chr6_84925057-84925057_G_A    | 149S>L  | Substitution | Nonsynonymous coding | 24% |
| MM04T | KIAA1009  | KIAA1009      | CCDS34494.2 | chr6_84836195-84836195_C_A    | 1303E>X | Substitution | Nonsense             | 31% |
| MM04T | KIAA1107  | KIAA1107      | CCDS44172.1 | chr1_92647337-92647337_G_A    | 928R>Q  | Substitution | Nonsynonymous coding | 33% |
| MM04T | KIAA1109  | KIAA1109      | CCDS43267.1 | chr4_123178491-123178491_A_G  | 2154T>A | Substitution | Nonsynonymous coding | 25% |
| MM04T | KIAA1109  | KIAA1109      | CCDS43267.1 | chr4_123227125-123227125_T_C  | 3256S>P | Substitution | Nonsynonymous coding | 31% |
| MM04T | KIAA1109  | KIAA1109      | CCDS43267.1 | chr4_123246387-123246387_C_A  | 3636S>Y | Substitution | Nonsynonymous coding | 27% |
| MM04T | KIAA1109  | KIAA1109      | CCDS43267.1 | chr4_123268917-123268917_C_A  | 4371S>Y | Substitution | Nonsynonymous coding | 33% |
| MM04T | KIAA1109  | KIAA1109      | CCDS43267.1 | chr4_123264600-123264600_C_T  | 4130R>X | Substitution | Nonsense             | 35% |
| MM04T | KIAA1210  | KIAA1210      | CCDS48156.1 | chrX_118223163-118223163_G_T  | 677S>Y  | Substitution | Nonsynonymous coding | 26% |
| MM04T | KIAA1210  | KIAA1210      | CCDS48156.1 | chrX_118239046-118239046_G_T  | 326S>Y  | Substitution | Nonsynonymous coding | 22% |
| MM04T | KIAA1210  | KIAA1210      | CCDS48156.1 | chrX_118281550-118281550_C_A  | 99G>V   | Substitution | Nonsynonymous coding | 36% |
| MM04T | KIAA1210  | KIAA1210      | CCDS48156.1 | chrX_118284425-118284425_G_A  | 40R>X   | Substitution | Nonsense             | 28% |
| MM04T | KIAA1211  | KIAA1211      | CCDS43230.1 | chr4_57181878-57181878_A_G    | 737K>R  | Substitution | Nonsynonymous coding | 27% |
| MM04T | KIAA1239  | KIAA1239      | CCDS47040.1 | chr4_37447791-37447791_G_A    | 1394R>Q | Substitution | Nonsynonymous coding | 32% |
| MM04T | KIAA1324L | KIAA1324-like | CCDS47632.1 | chr7_86544166-86544166_C_A    | 535R>I  | Substitution | Nonsynonymous coding | 33% |
| MM04T | KIAA1324L | KIAA1324-like | CCDS47632.1 | chr7_86574241-86574241_C_T    | 210D>N  | Substitution | Nonsynonymous coding | 28% |
| MM04T | KIAA1377  | KIAA1377      | CCDS31658.1 | chr11_101828924-101828924_G_A | 178A>T  | Substitution | Nonsynonymous coding | 20% |
| MM04T | KIAA1383  | KIAA1383      | CCDS44334.1 | chr1_232943691-232943691_A_T  | 974K>N  | Substitution | Nonsynonymous coding | 38% |
| MM04T | KIAA1407  | KIAA1407      | CCDS2977.1  | chr3_113723549-113723549_C_T  | 638R>Q  | Substitution | Nonsynonymous coding | 33% |
| MM04T | KIAA1429  | KIAA1429      | CCDS34923.1 | chr8_95541498-95541498_G_T    | 227S>Y  | Substitution | Nonsynonymous coding | 33% |
| MM04T | KIAA1432  | KIAA1432      | CCDS34982.1 | chr9_5772740-5772740_C_T      | 1186R>W | Substitution | Nonsynonymous coding | 30% |
| MM04T | KIAA1462  | KIAA1462      | CCDS41500.1 | chr10_30336573-30336573_G_A   | 57R>C   | Substitution | Nonsynonymous coding | 26% |

|       |           |                           |             |                              |         |              |                      |     |
|-------|-----------|---------------------------|-------------|------------------------------|---------|--------------|----------------------|-----|
| MM04T | KIAA1549  | KIAA1549                  | CCDS47723.1 | chr7_138591737-138591737_C_T | 1080E>K | Substitution | Nonsynonymous coding | 15% |
| MM04T | KIAA1549L | KIAA1549-like             | CCDS44565.1 | chr11_33564273-33564273_G_T  | 91Q>H   | Substitution | Nonsynonymous coding | 28% |
| MM04T | KIAA1549L | KIAA1549-like             | CCDS44565.1 | chr11_33604953-33604953_C_T  | 1200T>M | Substitution | Nonsynonymous coding | 30% |
| MM04T | KIAA1549L | KIAA1549-like             | CCDS44565.1 | chr11_33689683-33689683_T_C  | 1851F>L | Substitution | Nonsynonymous coding | 36% |
| MM04T | KIAA1551  | KIAA1551                  | CCDS8725.2  | chr12_32137002-32137002_G_T  | 1038R>I | Substitution | Nonsynonymous coding | 27% |
| MM04T | KIAA1551  | KIAA1551                  | CCDS8725.2  | chr12_32134056-32134056_C_A  | 56S>X   | Substitution | Nonsense             | 23% |
| MM04T | KIAA1671  | KIAA1671                  | CCDS46676.1 | chr22_25436024-25436024_G_A  | 976R>Q  | Substitution | Nonsynonymous coding | 18% |
| MM04T | KIAA1671  | KIAA1671                  | CCDS46676.1 | chr22_25436896-25436896_G_A  | 1267E>K | Substitution | Nonsynonymous coding | 16% |
| MM04T | KIAA1731  | KIAA1731                  | CCDS44708.1 | chr11_93402856-93402856_C_T  | 150R>X  | Substitution | Nonsense             | 23% |
| MM04T | KIAA1755  | KIAA1755                  | CCDS33467.1 | chr20_36854081-36854081_C_T  | 719V>I  | Substitution | Nonsynonymous coding | 19% |
| MM04T | KIAA1755  | KIAA1755                  | CCDS33467.1 | chr20_36870025-36870025_C_A  | 170E>X  | Substitution | Nonsense             | 22% |
| MM04T | KIAA1919  | KIAA1919                  | CCDS5090.1  | chr6_111583470-111583470_T_G | 13V>G   | Substitution | Nonsynonymous coding | 37% |
| MM04T | KIAA1984  | KIAA1984                  | CCDS43906.1 | chr9_139700974-139700974_G_T | 376K>N  | Substitution | Nonsynonymous coding | 30% |
| MM04T | KIAA2018  | KIAA2018                  | CCDS43133.1 | chr3_113378160-113378160_A_T | 790M>K  | Substitution | Nonsynonymous coding | 24% |
| MM04T | KIAA2018  | KIAA2018                  | CCDS43133.1 | chr3_113379327-113379327_G_T | 401S>Y  | Substitution | Nonsynonymous coding | 27% |
| MM04T | KIAA2018  | KIAA2018                  | CCDS43133.1 | chr3_113379265-113379265_G_A | 422R>X  | Substitution | Nonsense             | 29% |
| MM04T | KIF11     | kinesin family member 11  | CCDS7422.1  | chr10_94369173-94369173_T_G  | 202I>S  | Substitution | Nonsynonymous coding | 22% |
| MM04T | KIF12     | kinesin family member 12  | CCDS6801.1  | chr9_116859619-116859619_A_C | 65F>C   | Substitution | Nonsynonymous coding | 20% |
| MM04T | KIF13A    | kinesin family member 13A | CCDS47381.1 | chr6_17764501-17764501_G_T   | 1753S>Y | Substitution | Nonsynonymous coding | 34% |
| MM04T | KIF13B    | kinesin family member 13B | NM_015254   | chr8_29013298-29013298_T_G   | 494I>L  | Substitution | Nonsynonymous coding | 24% |
| MM04T | KIF14     | kinesin family member 14  | CCDS30963.1 | chr1_200558349-200558349_T_G | 1037K>T | Substitution | Nonsynonymous coding | 30% |
| MM04T | KIF14     | kinesin family member 14  | CCDS30963.1 | chr1_200583453-200583453_G_A | 483T>I  | Substitution | Nonsynonymous coding | 24% |
| MM04T | KIF15     | kinesin family member 15  | CCDS33744.1 | chr3_44827929-44827929_G_T   | 168E>X  | Substitution | Nonsense             | 34% |
| MM04T | KIF16B    | kinesin family member 16B | CCDS13122.1 | chr20_16360255-16360255_G_A  | 798R>W  | Substitution | Nonsynonymous coding | 10% |
| MM04T | KIF16B    | kinesin family member 16B | CCDS13122.1 | chr20_16360651-16360651_C_T  | 666E>K  | Substitution | Nonsynonymous coding | 26% |
| MM04T | KIF18A    | kinesin family member 18A | CCDS7867.1  | chr11_28112183-28112183_C_T  | 227R>H  | Substitution | Nonsynonymous coding | 14% |
| MM04T | KIF1B     | kinesin family member 1B  | CCDS112.1   | chr1_10363524-10363524_G_A   | 761A>T  | Substitution | Nonsynonymous coding | 27% |
| MM04T | KIF20B    | kinesin family member 20B | CCDS7407.1  | chr10_91497545-91497545_A_C  | 943K>Q  | Substitution | Nonsynonymous coding | 32% |
| MM04T | KIF20B    | kinesin family member 20B | CCDS7407.1  | chr10_91522554-91522554_C_T  | 1611P>S | Substitution | Nonsynonymous coding | 30% |
| MM04T | KIF21A    | kinesin family member 21A | CCDS31773.1 | chr12_39757002-39757002_T_C  | 306N>S  | Substitution | Nonsynonymous coding | 24% |
| MM04T | KIF21A    | kinesin family member 21A | CCDS31773.1 | chr12_39761758-39761758_C_A  | 176R>I  | Substitution | Nonsynonymous coding | 26% |
| MM04T | KIF23     | kinesin family member 23  | CCDS32278.1 | chr15_69738627-69738627_G_A  | 907R>Q  | Substitution | Nonsynonymous coding | 27% |

|       |         |                                                             |                 |                               |        |              |                      |     |
|-------|---------|-------------------------------------------------------------|-----------------|-------------------------------|--------|--------------|----------------------|-----|
| MM04T | KIF2B   | kinesin family member 2B                                    | CCDS32685.1     | chr17_51900492-51900492_C_T   | 33A>V  | Substitution | Nonsynonymous coding | 30% |
| MM04T | KIF4A   | kinesin family member 4A                                    | CCDS14401.1     | chrX_69626765-69626765__A     | NA     | Insertion    | Frameshift           | 17% |
| MM04T | KIF4A   | kinesin family member 4A                                    | CCDS14401.1     | chrX_69563819-69563819_T_G    | 473I>S | Substitution | Nonsynonymous coding | 27% |
| MM04T | KIF4A   | kinesin family member 4A                                    | CCDS14401.1     | chrX_69596024-69596024_G_T    | 666Q>H | Substitution | Nonsynonymous coding | 25% |
| MM04T | KIF4B   | kinesin family member 4B                                    | CCDS47324.1     | chr5_154395396-154395396_G_T  | 659E>D | Substitution | Nonsynonymous coding | 33% |
| MM04T | KIF5C   | kinesin family member 5C                                    | NM_004522       | chr2_149829977-149829977_G_T  | 415E>D | Substitution | Nonsynonymous coding | 18% |
| MM04T | KIR3DX1 | killer cell immunoglobulin-like receptor, three domains, X1 | ENST00000221567 | chr19_55048098-55048098_A_C   | 222K>T | Substitution | Nonsynonymous coding | 23% |
| MM04T | KLF3    | Kruppel-like factor 3 (basic)                               | CCDS3444.1      | chr4_38690369-38690369_C_T    | 74S>L  | Substitution | Nonsynonymous coding | 31% |
| MM04T | KLF7    | Kruppel-like factor 7 (ubiquitous)                          | CCDS2373.1      | chr2_207988705-207988705_C_T  | 176V>I | Substitution | Nonsynonymous coding | 27% |
| MM04T | KLHDC1  | kelch domain containing 1                                   | CCDS9692.1      | chr14_50199457-50199457_C_A   | 249S>X | Substitution | Nonsense             | 15% |
| MM04T | KLHDC9  | kelch domain containing 9                                   | CCDS30919.1     | chr1_161068420-161068420_C_A  | 32S>X  | Substitution | Nonsense             | 19% |
| MM04T | KLHL1   | kelch-like family member 1                                  | CCDS9445.1      | chr13_70371068-70371068_G_T   | 481I>M | Substitution | Nonsynonymous coding | 41% |
| MM04T | KLHL11  | kelch-like family member 11                                 | CCDS11411.1     | chr17_40010079-40010079_C_A   | 680W>C | Substitution | Nonsynonymous coding | 22% |
| MM04T | KLHL18  | kelch-like family member 18                                 | CCDS33749.1     | chr3_47384235-47384235_C_T    | 418S>L | Substitution | Nonsynonymous coding | 26% |
| MM04T | KLHL22  | kelch-like family member 22                                 | CCDS13779.1     | chr22_20785808-20785808_G_T   | 117F>L | Substitution | Nonsynonymous coding | 29% |
| MM04T | KLHL23  | kelch-like family member 23                                 | CCDS2236.1      | chr2_170592000-170592000_G_A  | 159R>Q | Substitution | Nonsynonymous coding | 63% |
| MM04T | KLHL24  | kelch-like 24 (Drosophila)                                  | CCDS3246.1      | chr3_183388894-183388894_C_T  | 433R>X | Substitution | Nonsense             | 24% |
| MM04T | KLHL32  | kelch-like 32 (Drosophila)                                  | CCDS5038.1      | chr6_97575331-97575331_C_A    | 469P>H | Substitution | Nonsynonymous coding | 26% |
| MM04T | KLHL33  | kelch-like 33 (Drosophila)                                  | NM_001109997    | chr14_20897408-20897408_A_G   | 401L>P | Substitution | Nonsynonymous coding | 17% |
| MM04T | KLHL33  | kelch-like 33 (Drosophila)                                  | NM_001109997    | chr14_20897516-20897516_G_A   | 365A>V | Substitution | Nonsynonymous coding | 19% |
| MM04T | KLHL34  | kelch-like 34 (Drosophila)                                  | CCDS14199.1     | chrX_21674274-21674274_C_T    | 545D>N | Substitution | Nonsynonymous coding | 12% |
| MM04T | KLHL34  | kelch-like 34 (Drosophila)                                  | CCDS14199.1     | chrX_21674535-21674535_C_T    | 458A>T | Substitution | Nonsynonymous coding | 26% |
| MM04T | KLHL41  | kelch-like 41 (Drosophila)                                  | CCDS2234.1      | chr2_170366764-170366764_C_A  | 159S>Y | Substitution | Nonsynonymous coding | 31% |
| MM04T | KLK5    | kallikrein-related peptidase 5                              | CCDS12810.1     | chr19_51452152-51452152_G_T   | 185C>X | Substitution | Nonsense             | 20% |
| MM04T | KLK6    | kallikrein-related peptidase 6                              | CCDS12811.1     | chr19_51466621-51466621_C_A   | 128E>X | Substitution | Nonsense             | 22% |
| MM04T | KLK8    | kallikrein-related peptidase 8                              | CCDS42600.1     | chr19_51503365-51503365_C_T   | 172R>H | Substitution | Nonsynonymous coding | 27% |
| MM04T | KNG1    | kininogen 1                                                 | CCDS43183.1     | chr3_186459351-186459351_G_A  | 389R>Q | Substitution | Nonsynonymous coding | 35% |
| MM04T | KNG1    | kininogen 1                                                 | CCDS43183.1     | chr3_186459426-186459426_A_C  | 414D>A | Substitution | Nonsynonymous coding | 34% |
| MM04T | KNTC1   | kinetochore associated 1                                    | CCDS45002.1     | chr12_123014678-123014678_G_T | 23R>I  | Substitution | Nonsynonymous coding | 26% |
| MM04T | KPNA1   | karyopherin alpha 1 (importin alpha 5)                      | CCDS3013.1      | chr3_122168458-122168458_C_T  | 294D>N | Substitution | Nonsynonymous coding | 26% |
| MM04T | KPNA1   | karyopherin alpha 1 (importin alpha 5)                      | CCDS3013.1      | chr3_122215392-122215392_C_A  | 7E>D   | Substitution | Nonsynonymous coding | 20% |
| MM04T | KRAS    | v-Ki-ras2 Kirsten rat sarcoma viral oncogene homolog        | CCDS8703.1      | chr12_25380181-25380181_T_A   | 93I>F  | Substitution | Nonsynonymous coding | 31% |

|       |        |                                               |                 |                               |         |              |                      |     |
|-------|--------|-----------------------------------------------|-----------------|-------------------------------|---------|--------------|----------------------|-----|
| MM04T | KRIT1  | KRIT1, ankyrin repeat containing              | CCDS5624.1      | chr7_91852280-91852280_G_A    | 423R>X  | Substitution | Nonsense             | 34% |
| MM04T | KRT1   | keratin 1                                     | CCDS8836.1      | chr12_53071971-53071971_C_A   | 281E>D  | Substitution | Nonsynonymous coding | 33% |
| MM04T | KRT10  | keratin 10                                    | CCDS11377.1     | chr17_38978345-38978345_G_A   | 165R>W  | Substitution | Nonsynonymous coding | 33% |
| MM04T | KRT12  | keratin 12                                    | CCDS11378.1     | chr17_39023102-39023102_G_T   | 113L>I  | Substitution | Nonsynonymous coding | 36% |
| MM04T | KRT28  | keratin 28                                    | CCDS11376.1     | chr17_38950174-38950174_C_T   | 368G>D  | Substitution | Nonsynonymous coding | 32% |
| MM04T | KRT3   | keratin 3                                     | CCDS44895.1     | chr12_53186971-53186971_C_A   | 301E>D  | Substitution | Nonsynonymous coding | 25% |
| MM04T | KRT32  | keratin 32                                    | CCDS11393.1     | chr17_39620542-39620542_T_G   | 288N>H  | Substitution | Nonsynonymous coding | 22% |
| MM04T | KRT36  | keratin 36                                    | CCDS11395.1     | chr17_39645675-39645675_C_T   | 148E>K  | Substitution | Nonsynonymous coding | 30% |
| MM04T | KRT4   | keratin 4                                     | CCDS41787.1     | chr12_53205605-53205605_C_A   | 281G>W  | Substitution | Nonsynonymous coding | 24% |
| MM04T | KRT72  | keratin 72                                    | CCDS8833.1      | chr12_52985254-52985254_C_A   | 319Q>H  | Substitution | Nonsynonymous coding | 19% |
| MM04T | KSR1   | kinase suppressor of ras 1                    | ENST00000398985 | chr17_25904817-25904817_G_T   | 105E>D  | Substitution | Nonsynonymous coding | 17% |
| MM04T | KSR2   | kinase suppressor of ras 2                    | NM_173598       | chr12_117907466-117907466_C_A | NA      | Substitution | Splice site donor    | 12% |
| MM04T | KTN1   | kinectin 1 (kinesin receptor)                 | CCDS41957.1     | chr14_56117292-56117292_G_T   | 834L>F  | Substitution | Nonsynonymous coding | 23% |
| MM04T | L2HGDH | L-2-hydroxyglutarate dehydrogenase            | CCDS9698.1      | chr14_50732183-50732183_C_A   | 363Q>H  | Substitution | Nonsynonymous coding | 31% |
| MM04T | L2HGDH | L-2-hydroxyglutarate dehydrogenase            | CCDS9698.1      | chr14_50760943-50760943_C_A   | 144E>X  | Substitution | Nonsense             | 23% |
| MM04T | LAMA1  | laminin, alpha 1                              | CCDS32787.1     | chr18_6978221-6978221_T_C     | 2055Q>R | Substitution | Nonsynonymous coding | 35% |
| MM04T | LAMA1  | laminin, alpha 1                              | CCDS32787.1     | chr18_7016579-7016579_C_T     | 967G>D  | Substitution | Nonsynonymous coding | 31% |
| MM04T | LAMA1  | laminin, alpha 1                              | CCDS32787.1     | chr18_7080087-7080087_C_A     | NA      | Substitution | Splice site acceptor | 19% |
| MM04T | LAMA1  | laminin, alpha 1                              | CCDS32787.1     | chr18_7040191-7040191_C_A     | 436E>X  | Substitution | Nonsense             | 25% |
| MM04T | LAMA2  | laminin, alpha 2                              | CCDS5138.1      | chr6_129649451-129649451_G_A  | 1402R>H | Substitution | Nonsynonymous coding | 36% |
| MM04T | LAMA2  | laminin, alpha 2                              | CCDS5138.1      | chr6_129777503-129777503_C_A  | 2244S>Y | Substitution | Nonsynonymous coding | 28% |
| MM04T | LAMA3  | laminin, alpha 3                              | CCDS42419.1     | chr18_21451411-21451411_C_T   | 1595A>V | Substitution | Nonsynonymous coding | 16% |
| MM04T | LAMA3  | laminin, alpha 3                              | CCDS42419.1     | chr18_21479315-21479315_C_A   | 1967S>Y | Substitution | Nonsynonymous coding | 18% |
| MM04T | LAMA3  | laminin, alpha 3                              | CCDS42419.1     | chr18_21478789-21478789_G_T   | 1901E>X | Substitution | Nonsense             | 29% |
| MM04T | LAMB1  | laminin, beta 1                               | CCDS5750.1      | chr7_107591768-107591768_C_A  | NA      | Substitution | Splice site acceptor | 32% |
| MM04T | LAMC3  | laminin, gamma 3                              | CCDS6938.1      | chr9_133884784-133884784_C_A  | 61F>L   | Substitution | Nonsynonymous coding | 17% |
| MM04T | LARP1B | La ribonucleoprotein domain family, member 1B | CCDS3738.1      | chr4_129035784-129035784_A_C  | 350T>P  | Substitution | Nonsynonymous coding | 33% |
| MM04T | LARP1B | La ribonucleoprotein domain family, member 1B | CCDS3738.1      | chr4_128998997-128998997_G_T  | 33E>X   | Substitution | Nonsense             | 35% |
| MM04T | LARP1B | La ribonucleoprotein domain family, member 1B | CCDS3738.1      | chr4_129043215-129043215_C_T  | 466R>X  | Substitution | Nonsense             | 30% |
| MM04T | LARP7  | La ribonucleoprotein domain family, member 7  | CCDS3701.2      | chr4_113574380-113574380_G_A  | 522E>K  | Substitution | Nonsynonymous coding | 34% |
| MM04T | LARS   | leucyl-tRNA synthetase                        | CCDS34265.1     | chr5_145529263-145529263_C_A  | NA      | Substitution | Splice site acceptor | 26% |
| MM04T | LARS   | leucyl-tRNA synthetase                        | CCDS34265.1     | chr5_145531439-145531439_C_A  | 471G>X  | Substitution | Nonsense             | 28% |

|       |         |                                                                                   |                 |                              |         |              |                      |     |
|-------|---------|-----------------------------------------------------------------------------------|-----------------|------------------------------|---------|--------------|----------------------|-----|
| MM04T | LAX1    | lymphocyte transmembrane adaptor 1                                                | CCDS1441.2      | chr1_203743181-203743181_C_T | 190S>L  | Substitution | Nonsynonymous coding | 18% |
| MM04T | LBR     | lamin B receptor                                                                  | CCDS1545.1      | chr1_225599097-225599097_C_T | 377R>Q  | Substitution | Nonsynonymous coding | 33% |
| MM04T | LCA5    | Leber congenital amaurosis 5                                                      | CCDS4990.1      | chr6_80223159-80223159_G_A   | 164H>Y  | Substitution | Nonsynonymous coding | 26% |
| MM04T | LCE3A   | late cornified envelope 3A                                                        | CCDS1017.1      | chr1_152595326-152595326_G_T | 85S>Y   | Substitution | Nonsynonymous coding | 29% |
| MM04T | LCE4A   | late cornified envelope 4A                                                        | CCDS1022.1      | chr1_152681575-152681575_G_T | 8Q>H    | Substitution | Nonsynonymous coding | 31% |
| MM04T | LCN2    | lipocalin 2                                                                       | CCDS6892.1      | chr9_130913923-130913923_G_T | 94K>N   | Substitution | Nonsynonymous coding | 21% |
| MM04T | LCORL   | ligand dependent nuclear receptor corepressor-like                                | CCDS3425.1      | chr4_17974499-17974499_C_A   | 55S>I   | Substitution | Nonsynonymous coding | 40% |
| MM04T | LCP1    | lymphocyte cytosolic protein 1 (L-plastin)                                        | CCDS9403.1      | chr13_46704945-46704945_G_A  | NA      | Substitution | Splice site donor    | 35% |
| MM04T | LCP2    | lymphocyte cytosolic protein 2 (SH2 domain containing leukocyte protein of 76kDa) | CCDS47339.1     | chr5_169688114-169688114_C_A | 318E>D  | Substitution | Nonsynonymous coding | 30% |
| MM04T | LCP2    | lymphocyte cytosolic protein 2 (SH2 domain containing leukocyte protein of 76kDa) | CCDS47339.1     | chr5_169685045-169685045_C_A | 366E>X  | Substitution | Nonsense             | 29% |
| MM04T | LCT     | lactase                                                                           | CCDS2178.1      | chr2_136564940-136564940_G_A | 1311R>X | Substitution | Nonsense             | 32% |
| MM04T | LDB3    | LIM domain binding 3                                                              | CCDS41544.1     | chr10_88447002-88447002_C_T  | 174A>V  | Substitution | Nonsynonymous coding | 29% |
| MM04T | LDLRAD4 | low density lipoprotein receptor class A domain containing 4                      | CCDS32793.1     | chr18_13438288-13438288_C_T  | 29S>L   | Substitution | Nonsynonymous coding | 32% |
| MM04T | LDLRAP1 | low density lipoprotein receptor adaptor protein 1                                | CCDS30639.1     | chr1_25880423-25880423_G_T   | 33E>D   | Substitution | Nonsynonymous coding | 22% |
| MM04T | LEMD3   | LEM domain containing 3                                                           | CCDS8972.1      | chr12_65632546-65632546_C_T  | 625R>X  | Substitution | Nonsense             | 36% |
| MM04T | LEPRE1  | leucine proline-enriched proteoglycan (leprecan) 1                                | CCDS472.2       | chr1_43213029-43213029_T_G   | 657N>H  | Substitution | Nonsynonymous coding | 34% |
| MM04T | LGI2    | leucine-rich repeat LGI family, member 2                                          | CCDS3431.1      | chr4_25005110-25005110_T_G   | 534K>T  | Substitution | Nonsynonymous coding | 47% |
| MM04T | LGI2    | leucine-rich repeat LGI family, member 2                                          | CCDS3431.1      | chr4_25026491-25026491_C_T   | 122E>K  | Substitution | Nonsynonymous coding | 27% |
| MM04T | LGMN    | legumain                                                                          | CCDS9904.1      | chr14_93179178-93179178_C_A  | 194M>I  | Substitution | Nonsynonymous coding | 27% |
| MM04T | LGR4    | leucine-rich repeat containing G protein-coupled receptor 4                       | CCDS31449.1     | chr11_27390555-27390555_G_A  | 572S>L  | Substitution | Nonsynonymous coding | 24% |
| MM04T | LGR6    | leucine-rich repeat containing G protein-coupled receptor 6                       | ENST00000420582 | chr1_202163716-202163716_G_T | 31R>I   | Substitution | Nonsynonymous coding | 13% |
| MM04T | LHCGR   | luteinizing hormone/choriogonadotropin receptor                                   | CCDS1842.1      | chr2_48914853-48914853_G_A   | 695R>C  | Substitution | Nonsynonymous coding | 34% |
| MM04T | LHCGR   | luteinizing hormone/choriogonadotropin receptor                                   | CCDS1842.1      | chr2_48915795-48915795_G_T   | 381L>I  | Substitution | Nonsynonymous coding | 33% |
| MM04T | LHCGR   | luteinizing hormone/choriogonadotropin receptor                                   | ENST00000428232 | chr2_48948859-48948859_T_C   | 165N>S  | Substitution | Nonsynonymous coding | 31% |
| MM04T | LHCGR   | luteinizing hormone/choriogonadotropin receptor                                   | CCDS1842.1      | chr2_48950628-48950628_G_T   | 168A>D  | Substitution | Nonsynonymous coding | 21% |
| MM04T | LHFPL5  | lipoma HMGIC fusion partner-like 5                                                | CCDS4812.1      | chr6_35773483-35773483_G_T   | 12K>N   | Substitution | Nonsynonymous coding | 22% |
| MM04T | LIFR    | leukemia inhibitory factor receptor alpha                                         | CCDS3927.1      | chr5_38489288-38489288_T_G   | 743K>Q  | Substitution | Nonsynonymous coding | 26% |
| MM04T | LILRA1  | leukocyte immunoglobulin-like receptor, subfamily A (with TM domain), member 1    | CCDS12901.1     | chr19_55110749-55110749_C_T  | 437A>V  | Substitution | Nonsynonymous coding | 28% |
| MM04T | LILRA5  | leukocyte immunoglobulin-like receptor, subfamily A (with TM domain), member 5    | CCDS12888.1     | chr19_54823891-54823891_C_T  | 2A>T    | Substitution | Nonsynonymous coding | 39% |
| MM04T | LILRB5  | leukocyte immunoglobulin-like receptor, subfamily B (with TM and ITIM domains)    | CCDS46176.1     | chr19_54760640-54760640_G_T  | NA      | Substitution | Splice site acceptor | 22% |
| MM04T | LIMCH1  | LIM and calponin homology domains 1                                               | CCDS33977.1     | chr4_41496589-41496589_C_T   | 45R>W   | Substitution | Nonsynonymous coding | 18% |
| MM04T | LIMCH1  | LIM and calponin homology domains 1                                               | ENST00000313875 | chr4_41635727-41635727_A_C   | 664R>S  | Substitution | Nonsynonymous coding | 32% |

|       |           |                                                                     |                 |                              |         |              |                      |     |
|-------|-----------|---------------------------------------------------------------------|-----------------|------------------------------|---------|--------------|----------------------|-----|
| MM04T | LIMCH1    | LIM and calponin homology domains 1                                 | CCDS33977.1     | chr4_41682098-41682098_C_T   | 815R>C  | Substitution | Nonsynonymous coding | 24% |
| MM04T | LIMCH1    | LIM and calponin homology domains 1                                 | CCDS33977.1     | chr4_41694357-41694357_G_A   | 1061R>Q | Substitution | Nonsynonymous coding | 31% |
| MM04T | LIMK2     | LIM domain kinase 2                                                 | CCDS33637.1     | chr22_31663853-31663853_A_G  | 386Y>C  | Substitution | Nonsynonymous coding | 30% |
| MM04T | LIMK2     | LIM domain kinase 2                                                 | CCDS33637.1     | chr22_31663018-31663018_C_T  | 343R>X  | Substitution | Nonsense             | 31% |
| MM04T | LIN28B    | lin-28 homolog B (C. elegans)                                       | CCDS34504.1     | chr6_105526432-105526432_C_A | 176S>Y  | Substitution | Nonsynonymous coding | 37% |
| MM04T | LIN37     | lin-37 homolog (C. elegans)                                         | NM_019104       | chr19_36244945-36244945_C_T  | 158R>C  | Substitution | Nonsynonymous coding | 30% |
| MM04T | LIN54     | lin-54 homolog (C. elegans)                                         | CCDS3599.1      | chr4_83891556-83891556_A_C   | 292V>G  | Substitution | Nonsynonymous coding | 34% |
| MM04T | LIN7C     | lin-7 homolog C (C. elegans)                                        | CCDS7864.1      | chr11_27523471-27523471_G_T  | NA      | Substitution | Splice site acceptor | 28% |
| MM04T | LIN9      | lin-9 homolog (C. elegans)                                          | CCDS1553.1      | chr1_226421127-226421127_G_T | 464S>Y  | Substitution | Nonsynonymous coding | 22% |
| MM04T | LIN9      | lin-9 homolog (C. elegans)                                          | CCDS1553.1      | chr1_226474059-226474059_G_A | 183R>W  | Substitution | Nonsynonymous coding | 20% |
| MM04T | LINC00477 | long intergenic non-protein coding RNA 477                          | ENST00000358374 | chr12_24736816-24736816_G_A  | 80R>C   | Substitution | Nonsynonymous coding | 20% |
| MM04T | LIPC      | lipase, hepatic                                                     | CCDS10166.1     | chr15_58830636-58830636_C_T  | 65R>X   | Substitution | Nonsense             | 30% |
| MM04T | LIPE      | lipase, hormone-sensitive                                           | CCDS12607.1     | chr19_42907110-42907110_C_A  | 872K>N  | Substitution | Nonsynonymous coding | 34% |
| MM04T | LIP1      | lipase, member I                                                    | CCDS13564.1     | chr21_15537607-15537607_C_A  | 301D>Y  | Substitution | Nonsynonymous coding | 19% |
| MM04T | LIP1      | lipase, member I                                                    | CCDS13564.1     | chr21_15561394-15561394_T_G  | 152K>N  | Substitution | Nonsynonymous coding | 22% |
| MM04T | LIPM      | lipase, family member M                                             | CCDS44457.1     | chr10_90574901-90574901_G_T  | 211A>S  | Substitution | Nonsynonymous coding | 29% |
| MM04T | LMAN1     | lectin, mannose-binding, 1                                          | CCDS11974.1     | chr18_57000356-57000356_C_A  | 447K>N  | Substitution | Nonsynonymous coding | 24% |
| MM04T | LMAN2     | lectin, mannose-binding 2                                           | CCDS4417.1      | chr5_176764447-176764447_C_T | 198E>K  | Substitution | Nonsynonymous coding | 26% |
| MM04T | LMLN      | leishmanolysin-like (metallopeptidase M8 family)                    | CCDS46988.1     | chr3_197729916-197729916_G_T | 421E>D  | Substitution | Nonsynonymous coding | 18% |
| MM04T | LMNB1     | lamin B1                                                            | CCDS4140.1      | chr5_126141288-126141288_A_G | 181K>R  | Substitution | Nonsynonymous coding | 38% |
| MM04T | LMO7      | LIM domain 7                                                        | CCDS9454.1      | chr13_76378506-76378506_C_T  | 300S>L  | Substitution | Nonsynonymous coding | 26% |
| MM04T | LMO7      | LIM domain 7                                                        | NM_015842       | chr13_76382315-76382315_G_T  | 399K>N  | Substitution | Nonsynonymous coding | 22% |
| MM04T | LMO7      | LIM domain 7                                                        | CCDS9454.1      | chr13_76393550-76393550_C_T  | 414R>C  | Substitution | Nonsynonymous coding | 39% |
| MM04T | LMOD2     | leiomodrin 2 (cardiac)                                              | CCDS47693.1     | chr7_123302263-123302263_G_T | 208S>I  | Substitution | Nonsynonymous coding | 32% |
| MM04T | LMX1B     | LIM homeobox transcription factor 1, beta                           | CCDS6866.1      | chr9_129455842-129455842_C_T | 238R>C  | Substitution | Nonsynonymous coding | 17% |
| MM04T | LONRF3    | LON peptidase N-terminal domain and ring finger 3                   | CCDS35374.1     | chrX_118147138-118147138_G_A | 650D>N  | Substitution | Nonsynonymous coding | 33% |
| MM04T | LONRF3    | LON peptidase N-terminal domain and ring finger 3                   | CCDS35374.1     | chrX_118151615-118151615_C_T | 748R>X  | Substitution | Nonsense             | 18% |
| MM04T | LPAR6     | lysophosphatidic acid receptor 6                                    | CCDS9410.1      | chr13_48986147-48986147_G_A  | 138T>I  | Substitution | Nonsynonymous coding | 43% |
| MM04T | LPCAT4    | lysophosphatidylcholine acyltransferase 4                           | CCDS32191.1     | chr15_34653711-34653711_C_T  | 345A>T  | Substitution | Nonsynonymous coding | 26% |
| MM04T | LPIN1     | lipin 1                                                             | CCDS1682.1      | chr2_11964783-11964783_G_A   | 847D>N  | Substitution | Nonsynonymous coding | 35% |
| MM04T | LRBA      | LPS-responsive vesicle trafficking, beach and anchor containing     | CCDS3773.1      | chr4_151827521-151827521_C_A | 510K>N  | Substitution | Nonsynonymous coding | 16% |
| MM04T | LRCH1     | leucine-rich repeats and calponin homology (CH) domain containing 1 | CCDS31972.1     | chr13_47297460-47297460_C_T  | 587R>C  | Substitution | Nonsynonymous coding | 23% |

|       |         |                                                                      |                 |                               |         |              |                      |     |
|-------|---------|----------------------------------------------------------------------|-----------------|-------------------------------|---------|--------------|----------------------|-----|
| MM04T | LRCH2   | leucine-rich repeats and calponin homology (CH) domain containing 2  | CCDS48155.1     | chrX_114384500-114384500_C_A  | 529E>X  | Substitution | Nonsense             | 29% |
| MM04T | LRCH4   | leucine-rich repeats and calponin homology (CH) domain containing 4  | CCDS34706.1     | chr7_100173914-100173914_G_A  | 529R>W  | Substitution | Nonsynonymous coding | 18% |
| MM04T | LRCH4   | leucine-rich repeats and calponin homology (CH) domain containing 4  | CCDS34706.1     | chr7_100175865-100175865_A_C  | 289F>V  | Substitution | Nonsynonymous coding | 21% |
| MM04T | LRIF1   | ligand dependent nuclear receptor interacting factor 1               | CCDS30800.1     | chr1_111490670-111490670_G_A  | 741R>X  | Substitution | Nonsense             | 22% |
| MM04T | LRIT2   | leucine-rich repeat, immunoglobulin-like and transmembrane domains 2 | CCDS31234.1     | chr10_85984698-85984698_G_T   | 95H>N   | Substitution | Nonsynonymous coding | 34% |
| MM04T | LRP1B   | low density lipoprotein receptor-related protein 1B                  | ENST00000442974 | chr2_141026845-141026845_C_T  | 183R>Q  | Substitution | Nonsynonymous coding | 10% |
| MM04T | LRP1B   | low density lipoprotein receptor-related protein 1B                  | CCDS2182.1      | chr2_141201978-141201978_C_A  | 3405K>N | Substitution | Nonsynonymous coding | 32% |
| MM04T | LRP1B   | low density lipoprotein receptor-related protein 1B                  | CCDS2182.1      | chr2_141291694-141291694_C_T  | 2553R>Q | Substitution | Nonsynonymous coding | 28% |
| MM04T | LRP2    | low density lipoprotein receptor-related protein 2                   | CCDS2232.1      | chr2_170011077-170011077_C_T  | 4063R>Q | Substitution | Nonsynonymous coding | 29% |
| MM04T | LRP2    | low density lipoprotein receptor-related protein 2                   | CCDS2232.1      | chr2_170060708-170060708_C_T  | 2597G>S | Substitution | Nonsynonymous coding | 13% |
| MM04T | LRP2    | low density lipoprotein receptor-related protein 2                   | CCDS2232.1      | chr2_170063556-170063556_C_T  | 2225R>Q | Substitution | Nonsynonymous coding | 20% |
| MM04T | LRP2    | low density lipoprotein receptor-related protein 2                   | CCDS2232.1      | chr2_170063656-170063656_G_A  | 2192P>S | Substitution | Nonsynonymous coding | 32% |
| MM04T | LRP2    | low density lipoprotein receptor-related protein 2                   | CCDS2232.1      | chr2_170066037-170066037_G_T  | 2132S>Y | Substitution | Nonsynonymous coding | 28% |
| MM04T | LRP2    | low density lipoprotein receptor-related protein 2                   | CCDS2232.1      | chr2_170089947-170089947_G_A  | 1691A>V | Substitution | Nonsynonymous coding | 31% |
| MM04T | LRP6    | low density lipoprotein receptor-related protein 6                   | CCDS8647.1      | chr12_12315190-12315190_C_T   | 739R>Q  | Substitution | Nonsynonymous coding | 24% |
| MM04T | LRP6    | low density lipoprotein receptor-related protein 6                   | CCDS8647.1      | chr12_12334106-12334106_C_T   | 415R>Q  | Substitution | Nonsynonymous coding | 33% |
| MM04T | LRR1    | leucine rich repeat protein 1                                        | CCDS9686.1      | chr14_50074119-50074119_C_T   | 95A>V   | Substitution | Nonsynonymous coding | 26% |
| MM04T | LRRC10  | leucine rich repeat containing 10                                    | CCDS31856.1     | chr12_70004573-70004573_G_A   | 16R>C   | Substitution | Nonsynonymous coding | 25% |
| MM04T | LRRC14B | leucine rich repeat containing 14B                                   | CCDS47184.1     | chr5_194832-194832_G_T        | 303Q>H  | Substitution | Nonsynonymous coding | 39% |
| MM04T | LRRC16A | leucine rich repeat containing 16A                                   | NM_017640       | chr6_25472656-25472656_G_T    | 261D>Y  | Substitution | Nonsynonymous coding | 22% |
| MM04T | LRRC16A | leucine rich repeat containing 16A                                   | NM_017640       | chr6_25482569-25482569_A_C    | 320K>T  | Substitution | Nonsynonymous coding | 29% |
| MM04T | LRRC16A | leucine rich repeat containing 16A                                   | NM_017640       | chr6_25581521-25581521_G_A    | 954E>K  | Substitution | Nonsynonymous coding | 27% |
| MM04T | LRRC16B | leucine rich repeat containing 16B                                   | CCDS32054.1     | chr14_24526433-24526433_A_G   | 374T>A  | Substitution | Nonsynonymous coding | 20% |
| MM04T | LRRC18  | leucine rich repeat containing 18                                    | CCDS31197.1     | chr10_50122157-50122157_A_G   | 15L>P   | Substitution | Nonsynonymous coding | 31% |
| MM04T | LRRC19  | leucine rich repeat containing 19                                    | CCDS6518.1      | chr9_26997828-26997828_G_T    | 165L>I  | Substitution | Nonsynonymous coding | 22% |
| MM04T | LRRC2   | leucine rich repeat containing 2                                     | CCDS2741.1      | chr3_46563069-46563069_G_A    | 337R>C  | Substitution | Nonsynonymous coding | 35% |
| MM04T | LRRC23  | leucine rich repeat containing 23                                    | CCDS8569.1      | chr12_7022090-7022090_C_T     | 319R>X  | Substitution | Nonsense             | 36% |
| MM04T | LRRC27  | leucine rich repeat containing 27                                    | CCDS31316.1     | chr10_134175022-134175022_C_T | 411P>L  | Substitution | Nonsynonymous coding | 29% |
| MM04T | LRRC27  | leucine rich repeat containing 27                                    | CCDS31316.1     | chr10_134188732-134188732_C_T | 527R>C  | Substitution | Nonsynonymous coding | 36% |
| MM04T | LRRC30  | leucine rich repeat containing 30                                    | CCDS42409.1     | chr18_7231828-7231828_T_C     | 231V>A  | Substitution | Nonsynonymous coding | 20% |
| MM04T | LRRC39  | leucine rich repeat containing 39                                    | CCDS766.1       | chr1_100617949-100617949_C_A  | 315R>I  | Substitution | Nonsynonymous coding | 28% |
| MM04T | LRRC3B  | leucine rich repeat containing 3B                                    | CCDS2644.1      | chr3_26751258-26751258_G_A    | 32S>N   | Substitution | Nonsynonymous coding | 35% |

|       |         |                                                           |                 |                               |         |              |                      |     |
|-------|---------|-----------------------------------------------------------|-----------------|-------------------------------|---------|--------------|----------------------|-----|
| MM04T | LRRC49  | leucine rich repeat containing 49                         | CCDS32282.1     | chr15_71211448-71211448_G_T   | 209R>S  | Substitution | Nonsynonymous coding | 19% |
| MM04T | LRRC49  | leucine rich repeat containing 49                         | CCDS32282.1     | chr15_71276544-71276544_G_T   | 373D>Y  | Substitution | Nonsynonymous coding | 32% |
| MM04T | LRRC49  | leucine rich repeat containing 49                         | CCDS32282.1     | chr15_71329531-71329531_C_T   | 573R>W  | Substitution | Nonsynonymous coding | 33% |
| MM04T | LRRC4B  | leucine rich repeat containing 4B                         | CCDS42595.1     | chr19_51022603-51022603_G_A   | 123R>C  | Substitution | Nonsynonymous coding | 25% |
| MM04T | LRRC4C  | leucine rich repeat containing 4C                         | CCDS31464.1     | chr11_40135960-40135960_C_T   | 628R>Q  | Substitution | Nonsynonymous coding | 44% |
| MM04T | LRRC4C  | leucine rich repeat containing 4C                         | CCDS31464.1     | chr11_40137334-40137334_C_A   | 170R>I  | Substitution | Nonsynonymous coding | 26% |
| MM04T | LRRC53  | leucine rich repeat containing 53                         | ENST00000416014 | chr1_74946244-74946244_T_C    | 166N>S  | Substitution | Nonsynonymous coding | 36% |
| MM04T | LRRC56  | leucine rich repeat containing 56                         | CCDS7700.1      | chr11_541564-541564_C_T       | 69R>W   | Substitution | Nonsynonymous coding | 27% |
| MM04T | LRRC59  | leucine rich repeat containing 59                         | CCDS11566.1     | chr17_48462638-48462638_G_A   | 173R>C  | Substitution | Nonsynonymous coding | 22% |
| MM04T | LRRC73  | leucine rich repeat containing 73                         | CCDS34456.1     | chr6_43475406-43475406_T_C    | 223D>G  | Substitution | Nonsynonymous coding | 33% |
| MM04T | LRRC8A  | leucine rich repeat containing 8 family, member A         | CCDS35155.1     | chr9_131670170-131670170_C_A  | 243L>M  | Substitution | Nonsynonymous coding | 21% |
| MM04T | LRRC8C  | leucine rich repeat containing 8 family, member C         | CCDS725.1       | chr1_90179249-90179249_C_T    | 374L>F  | Substitution | Nonsynonymous coding | 39% |
| MM04T | LRRCC1  | leucine rich repeat and coiled-coil centrosomal protein 1 | CCDS43750.1     | chr8_86035691-86035691_C_A    | 325P>Q  | Substitution | Nonsynonymous coding | 15% |
| MM04T | LRRFIP1 | leucine rich repeat (in FLII) interacting protein 1       | CCDS46552.1     | chr2_238672520-238672520_G_A  | 722D>N  | Substitution | Nonsynonymous coding | 31% |
| MM04T | LRRFIP2 | leucine rich repeat (in FLII) interacting protein 2       | CCDS2664.1      | chr3_37136305-37136305_T_G    | 338D>A  | Substitution | Nonsynonymous coding | 28% |
| MM04T | LRRIQ1  | leucine-rich repeats and IQ motif containing 1            | CCDS41816.1     | chr12_85450097-85450097_A_C   | 509K>T  | Substitution | Nonsynonymous coding | 34% |
| MM04T | LRRIQ1  | leucine-rich repeats and IQ motif containing 1            | CCDS41816.1     | chr12_85450583-85450583_G_T   | 671R>I  | Substitution | Nonsynonymous coding | 36% |
| MM04T | LRRIQ1  | leucine-rich repeats and IQ motif containing 1            | CCDS41816.1     | chr12_85459103-85459103_A_C   | 819N>H  | Substitution | Nonsynonymous coding | 29% |
| MM04T | LRRIQ1  | leucine-rich repeats and IQ motif containing 1            | CCDS41816.1     | chr12_85450348-85450348_G_T   | 593E>X  | Substitution | Nonsense             | 28% |
| MM04T | LRRIQ1  | leucine-rich repeats and IQ motif containing 1            | CCDS41816.1     | chr12_85450933-85450933_C_T   | 788R>X  | Substitution | Nonsense             | 34% |
| MM04T | LRRIQ1  | leucine-rich repeats and IQ motif containing 1            | CCDS41816.1     | chr12_85459124-85459124_C_T   | 826R>X  | Substitution | Nonsense             | 34% |
| MM04T | LRRIQ3  | leucine-rich repeats and IQ motif containing 3            | CCDS41350.1     | chr1_74506974-74506974_C_A    | 547E>D  | Substitution | Nonsynonymous coding | 28% |
| MM04T | LRRIQ4  | leucine-rich repeats and IQ motif containing 4            | CCDS46951.1     | chr3_169539767-169539767_C_T  | 20P>S   | Substitution | Nonsynonymous coding | 32% |
| MM04T | LRRK1   | leucine-rich repeat kinase 1                              | CCDS42086.1     | chr15_101562761-101562761_A_G | 676T>A  | Substitution | Nonsynonymous coding | 31% |
| MM04T | LRRK2   | leucine-rich repeat kinase 2                              | CCDS31774.1     | chr12_40693001-40693001_G_T   | 1146E>D | Substitution | Nonsynonymous coding | 19% |
| MM04T | LRRK2   | leucine-rich repeat kinase 2                              | CCDS31774.1     | chr12_40713792-40713792_T_G   | 1610I>M | Substitution | Nonsynonymous coding | 28% |
| MM04T | LRRK2   | leucine-rich repeat kinase 2                              | CCDS31774.1     | chr12_40716230-40716230_G_T   | 1809K>N | Substitution | Nonsynonymous coding | 31% |
| MM04T | LRRK2   | leucine-rich repeat kinase 2                              | CCDS31774.1     | chr12_40697937-40697937_G_A   | NA      | Substitution | Splice site donor    | 28% |
| MM04T | LRRK2   | leucine-rich repeat kinase 2                              | CCDS31774.1     | chr12_40677866-40677866_G_T   | 811G>X  | Substitution | Nonsense             | 26% |
| MM04T | LRRK2   | leucine-rich repeat kinase 2                              | CCDS31774.1     | chr12_40697829-40697829_G_T   | 1224E>X | Substitution | Nonsense             | 27% |
| MM04T | LRRN1   | leucine rich repeat neuronal 1                            | CCDS33685.1     | chr3_3887610-3887610_G_A      | 429D>N  | Substitution | Nonsynonymous coding | 22% |
| MM04T | LRRN1   | leucine rich repeat neuronal 1                            | CCDS33685.1     | chr3_3888129-3888129_C_A      | 602H>N  | Substitution | Nonsynonymous coding | 32% |



|       |         |                                                                      |                |                              |         |              |                      |     |
|-------|---------|----------------------------------------------------------------------|----------------|------------------------------|---------|--------------|----------------------|-----|
| MM04T | LRRN3   | leucine rich repeat neuronal 3                                       | CCDS5754.1     | chr7_110763046-110763046_T_G | 73I>S   | Substitution | Nonsynonymous coding | 23% |
| MM04T | LRRN3   | leucine rich repeat neuronal 3                                       | CCDS5754.1     | chr7_110763912-110763912_G_T | 362E>X  | Substitution | Nonsense             | 21% |
| MM04T | LRRTM3  | leucine rich repeat transmembrane neuronal 3                         | CCDS7270.1     | chr10_68687114-68687114_C_A  | 147S>Y  | Substitution | Nonsynonymous coding | 28% |
| MM04T | LRTOMT  | leucine rich transmembrane and O-methyltransferase domain containing | CCDS44668.1    | chr11_71817157-71817157_C_A  | 87L>I   | Substitution | Nonsynonymous coding | 51% |
| MM04T | LSG1    | large subunit GTPase 1 homolog (S. cerevisiae)                       | CCDS33922.1    | chr3_194373592-194373592_G_A | 347R>W  | Substitution | Nonsynonymous coding | 24% |
| MM04T | LSG1    | large subunit GTPase 1 homolog (S. cerevisiae)                       | CCDS33922.1    | chr3_194387300-194387300_C_A | 76E>D   | Substitution | Nonsynonymous coding | 24% |
| MM04T | LSP1    | lymphocyte-specific protein 1                                        | CCDS31334.1    | chr11_1905219-1905219_G_A    | 186E>K  | Substitution | Nonsynonymous coding | 11% |
| MM04T | LTA4H   | leukotriene A4 hydrolase                                             | CCDS9059.1     | chr12_96394808-96394808_C_T  | 599V>M  | Substitution | Nonsynonymous coding | 27% |
| MM04T | LTBP2   | latent transforming growth factor beta binding protein 2             | CCDS9831.1     | chr14_74995798-74995798_C_T  | 672G>E  | Substitution | Nonsynonymous coding | 35% |
| MM04T | LTBP4   | latent transforming growth factor beta binding protein 4             | ENST0000308370 | chr19_41133107-41133107_G_A  | 1471D>N | Substitution | Nonsynonymous coding | 24% |
| MM04T | LTN1    | listerin E3 ubiquitin protein ligase 1                               | CCDS33527.1    | chr21_30318561-30318561_C_A  | 1179S>I | Substitution | Nonsynonymous coding | 21% |
| MM04T | LTN1    | listerin E3 ubiquitin protein ligase 1                               | CCDS33527.1    | chr21_30343035-30343035_C_A  | 338K>N  | Substitution | Nonsynonymous coding | 22% |
| MM04T | LUC7L2  | LUC7-like 2 (S. cerevisiae)                                          | CCDS43656.1    | chr7_139106937-139106937_G_T | 344D>Y  | Substitution | Nonsynonymous coding | 26% |
| MM04T | LUM     | lumican                                                              | CCDS9038.1     | chr12_91502012-91502012_T_G  | 249N>H  | Substitution | Nonsynonymous coding | 36% |
| MM04T | LUM     | lumican                                                              | CCDS9038.1     | chr12_91502496-91502496_C_A  | 87E>D   | Substitution | Nonsynonymous coding | 26% |
| MM04T | LUZP2   | leucine zipper protein 2                                             | CCDS31446.1    | chr11_25100105-25100105_G_T  | 314L>F  | Substitution | Nonsynonymous coding | 35% |
| MM04T | LUZP4   | leucine zipper protein 4                                             | CCDS14567.1    | chrX_114536641-114536641_C_T | 59S>L   | Substitution | Nonsynonymous coding | 20% |
| MM04T | LY6E    | lymphocyte antigen 6 complex, locus E                                | CCDS6394.1     | chr8_144102737-144102737_C_T | 20S>L   | Substitution | Nonsynonymous coding | 30% |
| MM04T | LY75    | lymphocyte antigen 75                                                | CCDS2211.1     | chr2_160692081-160692081_C_T | 1195E>K | Substitution | Nonsynonymous coding | 22% |
| MM04T | LY75    | lymphocyte antigen 75                                                | CCDS2211.1     | chr2_160737752-160737752_C_A | NA      | Substitution | Splice site acceptor | 45% |
| MM04T | LYAR    | Ly1 antibody reactive                                                | CCDS3374.1     | chr4_4283564-4283564_T       | NA      | Insertion    | Frameshift           | 36% |
| MM04T | LYPLAL1 | lysophospholipase-like 1                                             | CCDS1522.1     | chr1_219352563-219352563_A_C | 56I>L   | Substitution | Nonsynonymous coding | 19% |
| MM04T | LYRM5   | LYR motif containing 5                                               | NM_001001660   | chr12_25357133-25357133_G_T  | 54E>X   | Substitution | Nonsense             | 27% |
| MM04T | LYST    | lysosomal trafficking regulator                                      | CCDS31062.1    | chr1_235937215-235937215_G_T | 1904S>Y | Substitution | Nonsynonymous coding | 26% |
| MM04T | LYST    | lysosomal trafficking regulator                                      | CCDS31062.1    | chr1_235964271-235964271_G_A | 1280S>F | Substitution | Nonsynonymous coding | 27% |
| MM04T | MAB21L3 | mab-21-like 3 (C. elegans)                                           | CCDS886.1      | chr1_116670245-116670245_G_T | 214E>X  | Substitution | Nonsense             | 21% |
| MM04T | MACF1   | microtubule-actin crosslinking factor 1                              | CCDS436.1      | chr1_39797308-39797308_C_T   | 123A>V  | Substitution | Nonsynonymous coding | 37% |
| MM04T | MACF1   | microtubule-actin crosslinking factor 1                              | CCDS436.1      | chr1_39800390-39800390_G_T   | 1150E>D | Substitution | Nonsynonymous coding | 19% |
| MM04T | MACF1   | microtubule-actin crosslinking factor 1                              | CCDS436.1      | chr1_39918368-39918368_C_T   | 5319R>X | Substitution | Nonsense             | 28% |
| MM04T | MADD    | MAP-kinase activating death domain                                   | CCDS7930.1     | chr11_47311028-47311028_C_T  | 934R>X  | Substitution | Nonsense             | 22% |
| MM04T | MAGEA10 | melanoma antigen family A, 10                                        | CCDS14705.1    | chrX_151303041-151303041_G_A | 351T>I  | Substitution | Nonsynonymous coding | 23% |
| MM04T | MAGEB18 | melanoma antigen family B, 18                                        | CCDS14216.1    | chrX_26157161-26157161_G_T   | 20C>F   | Substitution | Nonsynonymous coding | 31% |

|       |        |                                                                      |             |                              |         |              |                      |     |
|-------|--------|----------------------------------------------------------------------|-------------|------------------------------|---------|--------------|----------------------|-----|
| MM04T | MAGEB2 | melanoma antigen family B, 2                                         | CCDS14219.1 | chrX_30236803-30236803_G_A   | 36E>K   | Substitution | Nonsynonymous coding | 40% |
| MM04T | MAGEB4 | melanoma antigen family B, 4                                         | CCDS14221.1 | chrX_30260427-30260427_C_A   | 59P>T   | Substitution | Nonsynonymous coding | 19% |
| MM04T | MAGEC1 | melanoma antigen family C, 1                                         | CCDS35417.1 | chrX_140995658-140995658_C_T | 823S>L  | Substitution | Nonsynonymous coding | 26% |
| MM04T | MAGEC1 | melanoma antigen family C, 1                                         | CCDS35417.1 | chrX_140996050-140996050_C_T | 954R>C  | Substitution | Nonsynonymous coding | 21% |
| MM04T | MAGEC2 | melanoma antigen family C, 2                                         | CCDS14678.1 | chrX_141291178-141291178_T_C | 199E>G  | Substitution | Nonsynonymous coding | 24% |
| MM04T | MAGED1 | melanoma antigen family D, 1                                         | CCDS35279.1 | chrX_51639876-51639876_G_T   | 431Q>H  | Substitution | Nonsynonymous coding | 31% |
| MM04T | MAGED1 | melanoma antigen family D, 1                                         | CCDS35279.1 | chrX_51640912-51640912_G_T   | 586E>X  | Substitution | Nonsense             | 22% |
| MM04T | MAGEE1 | melanoma antigen family E, 1                                         | CCDS14433.1 | chrX_75649870-75649870_A_G   | 516E>G  | Substitution | Nonsynonymous coding | 39% |
| MM04T | MAGEE1 | melanoma antigen family E, 1                                         | CCDS14433.1 | chrX_75650296-75650296_G_T   | 658R>I  | Substitution | Nonsynonymous coding | 17% |
| MM04T | MAGEE1 | melanoma antigen family E, 1                                         | CCDS14433.1 | chrX_75651135-75651135_G_A   | 938E>K  | Substitution | Nonsynonymous coding | 29% |
| MM04T | MAGEE2 | melanoma antigen family E, 2                                         | CCDS14431.1 | chrX_75003449-75003449_C_A   | 480V>F  | Substitution | Nonsynonymous coding | 28% |
| MM04T | MAGEL2 | MAGE-like 2                                                          | NM_019066   | chr15_23890547-23890547_C_A  | 781E>D  | Substitution | Nonsynonymous coding | 18% |
| MM04T | MAGI1  | membrane associated guanylate kinase, WW and PDZ domain containing 1 | CCDS33780.1 | chr3_65342147-65342147_G_A   | 1432A>V | Substitution | Nonsynonymous coding | 29% |
| MM04T | MAGI2  | membrane associated guanylate kinase, WW and PDZ domain containing 2 | CCDS55594.1 | chr7_77708284-77708284_G_A   | 1229T>M | Substitution | Nonsynonymous coding | 21% |
| MM04T | MAGI2  | membrane associated guanylate kinase, WW and PDZ domain containing 2 | CCDS55594.1 | chr7_77824214-77824214_G_T   | 749S>Y  | Substitution | Nonsynonymous coding | 30% |
| MM04T | MAGI2  | membrane associated guanylate kinase, WW and PDZ domain containing 2 | CCDS55594.1 | chr7_77998488-77998488_C_T   | 363G>D  | Substitution | Nonsynonymous coding | 40% |
| MM04T | MAGI2  | membrane associated guanylate kinase, WW and PDZ domain containing 2 | CCDS55594.1 | chr7_78256462-78256462_G_A   | 171A>V  | Substitution | Nonsynonymous coding | 32% |
| MM04T | MAGI3  | membrane associated guanylate kinase, WW and PDZ domain containing 3 | CCDS860.1   | chr1_114224842-114224842_C_A | 1113P>T | Substitution | Nonsynonymous coding | 24% |
| MM04T | MAGT1  | magnesium transporter 1                                              | CCDS14436.2 | chrX_77096749-77096749_G_A   | 331R>X  | Substitution | Nonsense             | 35% |
| MM04T | MAK    | male germ cell-associated kinase                                     | CCDS4516.1  | chr6_10819153-10819153_G_T   | 41S>Y   | Substitution | Nonsynonymous coding | 37% |
| MM04T | MAL    | mal, T-cell differentiation protein                                  | CCDS2006.1  | chr2_95719196-95719196_C_A   | 153S>X  | Substitution | Nonsense             | 18% |
| MM04T | MAMDC2 | MAM domain containing 2                                              | CCDS6631.1  | chr9_72727944-72727944_T_C   | 180F>S  | Substitution | Nonsynonymous coding | 25% |
| MM04T | MAMLD1 | mastermind-like domain containing 1                                  | CCDS14693.2 | chrX_149638364-149638364_C_A | 173D>E  | Substitution | Nonsynonymous coding | 13% |
| MM04T | MAMLD1 | mastermind-like domain containing 1                                  | CCDS14693.2 | chrX_149638416-149638416_C_A | 191P>T  | Substitution | Nonsynonymous coding | 31% |
| MM04T | MAN2A2 | mannosidase, alpha, class 2A, member 2                               | CCDS32332.1 | chr15_91450624-91450624_G_T  | 365K>N  | Substitution | Nonsynonymous coding | 19% |
| MM04T | MANBA  | mannosidase, beta A, lysosomal                                       | CCDS3658.1  | chr4_103644033-103644033_G_A | 182R>W  | Substitution | Nonsynonymous coding | 40% |
| MM04T | MANBA  | mannosidase, beta A, lysosomal                                       | CCDS3658.1  | chr4_103610842-103610842_C_A | NA      | Substitution | Splice site acceptor | 26% |
| MM04T | MAOA   | monoamine oxidase A                                                  | CCDS14260.1 | chrX_43590966-43590966_C_A   | 274P>H  | Substitution | Nonsynonymous coding | 26% |
| MM04T | MAP1A  | microtubule-associated protein 1A                                    | CCDS42031.1 | chr15_43819880-43819880_G_T  | 2070S>I | Substitution | Nonsynonymous coding | 32% |
| MM04T | MAP1B  | microtubule-associated protein 1B                                    | CCDS4012.1  | chr5_71489773-71489773_G_T   | 197K>N  | Substitution | Nonsynonymous coding | 25% |
| MM04T | MAP1B  | microtubule-associated protein 1B                                    | CCDS4012.1  | chr5_71491465-71491465_G_T   | 761K>N  | Substitution | Nonsynonymous coding | 18% |
| MM04T | MAP1B  | microtubule-associated protein 1B                                    | CCDS4012.1  | chr5_71491652-71491652_G_A   | 824E>K  | Substitution | Nonsynonymous coding | 35% |

|       |         |                                                   |                 |                              |         |              |                      |     |
|-------|---------|---------------------------------------------------|-----------------|------------------------------|---------|--------------|----------------------|-----|
| MM04T | MAP1B   | microtubule-associated protein 1B                 | CCDS4012.1      | chr5_71491772-71491772_G_A   | 864E>K  | Substitution | Nonsynonymous coding | 31% |
| MM04T | MAP1B   | microtubule-associated protein 1B                 | CCDS4012.1      | chr5_71489692-71489692_G_A   | NA      | Substitution | Splice site acceptor | 29% |
| MM04T | MAP2    | microtubule-associated protein 2                  | ENST00000445941 | chr2_210555364-210555364_G_T | 164E>D  | Substitution | Nonsynonymous coding | 34% |
| MM04T | MAP2    | microtubule-associated protein 2                  | CCDS2384.1      | chr2_210570347-210570347_G_T | 1543R>I | Substitution | Nonsynonymous coding | 29% |
| MM04T | MAP2K4  | mitogen-activated protein kinase kinase 4         | CCDS11162.1     | chr17_11984773-11984773_G_T  | 107E>X  | Substitution | Nonsense             | 21% |
| MM04T | MAP2K4  | mitogen-activated protein kinase kinase 4         | CCDS11162.1     | chr17_12011200-12011200_G_T  | 203E>X  | Substitution | Nonsense             | 35% |
| MM04T | MAP2K6  | mitogen-activated protein kinase kinase 6         | CCDS11686.1     | chr17_67515559-67515559_G_A  | 118A>T  | Substitution | Nonsynonymous coding | 30% |
| MM04T | MAP2K7  | mitogen-activated protein kinase kinase 7         | CCDS42491.1     | chr19_7968853-7968853_G_T    | 8Q>H    | Substitution | Nonsynonymous coding | 19% |
| MM04T | MAP2K7  | mitogen-activated protein kinase kinase 7         | ENST00000425613 | chr19_7975124-7975124_C_A    | 147Q>K  | Substitution | Nonsynonymous coding | 26% |
| MM04T | MAP3K15 | mitogen-activated protein kinase kinase kinase 15 | CCDS35212.1     | chrX_19418711-19418711_C_T   | 114D>N  | Substitution | Nonsynonymous coding | 34% |
| MM04T | MAP3K15 | mitogen-activated protein kinase kinase kinase 15 | CCDS35212.1     | chrX_19418775-19418775_G_T   | 92F>L   | Substitution | Nonsynonymous coding | 28% |
| MM04T | MAP3K19 | mitogen-activated protein kinase kinase kinase 19 | CCDS2176.2      | chr2_135743936-135743936_C_A | 836D>Y  | Substitution | Nonsynonymous coding | 23% |
| MM04T | MAP3K19 | mitogen-activated protein kinase kinase kinase 19 | CCDS2176.2      | chr2_135744808-135744808_C_A | 545S>I  | Substitution | Nonsynonymous coding | 28% |
| MM04T | MAP3K19 | mitogen-activated protein kinase kinase kinase 19 | CCDS2176.2      | chr2_135745210-135745210_C_A | 411R>I  | Substitution | Nonsynonymous coding | 33% |
| MM04T | MAP3K19 | mitogen-activated protein kinase kinase kinase 19 | CCDS2176.2      | chr2_135745593-135745593_G_T | 283F>L  | Substitution | Nonsynonymous coding | 29% |
| MM04T | MAP3K19 | mitogen-activated protein kinase kinase kinase 19 | CCDS2176.2      | chr2_135745711-135745711_A_C | 244F>C  | Substitution | Nonsynonymous coding | 35% |
| MM04T | MAP3K2  | mitogen-activated protein kinase kinase kinase 2  | CCDS46404.1     | chr2_128072339-128072339_C_A | 483D>Y  | Substitution | Nonsynonymous coding | 36% |
| MM04T | MAP3K5  | mitogen-activated protein kinase kinase kinase 5  | CCDS5179.1      | chr6_136935369-136935369_T_G | 736N>H  | Substitution | Nonsynonymous coding | 28% |
| MM04T | MAP3K5  | mitogen-activated protein kinase kinase kinase 5  | CCDS5179.1      | chr6_137017107-137017107_T_C | 355Y>C  | Substitution | Nonsynonymous coding | 23% |
| MM04T | MAP3K6  | mitogen-activated protein kinase kinase kinase 6  | CCDS299.1       | chr1_27687856-27687856_C_T   | 573A>T  | Substitution | Nonsynonymous coding | 27% |
| MM04T | MAP3K7  | mitogen-activated protein kinase kinase kinase 7  | CCDS5028.1      | chr6_91278339-91278339_G_A   | 79R>W   | Substitution | Nonsynonymous coding | 30% |
| MM04T | MAP3K8  | mitogen-activated protein kinase kinase kinase 8  | CCDS7166.1      | chr10_30728021-30728021_G_T  | 52D>Y   | Substitution | Nonsynonymous coding | 31% |
| MM04T | MAP4K1  | mitogen-activated protein kinase kinase kinase 1  | CCDS42564.1     | chr19_39086348-39086348_G_A  | 734P>L  | Substitution | Nonsynonymous coding | 20% |
| MM04T | MAP6    | microtubule-associated protein 6                  | CCDS31641.1     | chr11_75298132-75298132_T_C  | 805H>R  | Substitution | Nonsynonymous coding | 24% |
| MM04T | MAP7    | microtubule-associated protein 7                  | CCDS5178.1      | chr6_136704883-136704883_G_A | 188S>L  | Substitution | Nonsynonymous coding | 34% |
| MM04T | MAP7D3  | MAP7 domain containing 3                          | CCDS44004.1     | chrX_135313984-135313984_G_A | 378P>S  | Substitution | Nonsynonymous coding | 23% |
| MM04T | MAP7D3  | MAP7 domain containing 3                          | CCDS44004.1     | chrX_135322636-135322636_C_T | 182R>Q  | Substitution | Nonsynonymous coding | 37% |
| MM04T | MAP7D3  | MAP7 domain containing 3                          | CCDS44004.1     | chrX_135328491-135328491_G_A | 27A>V   | Substitution | Nonsynonymous coding | 18% |
| MM04T | MAP9    | microtubule-associated protein 9                  | CCDS35493.1     | chr4_156281568-156281568_C_A | NA      | Substitution | Splice site acceptor | 40% |
| MM04T | MAPK10  | mitogen-activated protein kinase 10               | CCDS34026.1     | chr4_87080614-87080614_C_T   | 25D>N   | Substitution | Nonsynonymous coding | 35% |
| MM04T | MAPK12  | mitogen-activated protein kinase 12               | CCDS14089.1     | chr22_50693933-50693933_C_T  | 267E>K  | Substitution | Nonsynonymous coding | 33% |
| MM04T | MAPK8   | mitogen-activated protein kinase 8                | CCDS7223.1      | chr10_49632554-49632554_C_A  | NA      | Substitution | Splice site acceptor | 20% |

|       |          |                                                                                     |                 |                               |         |              |                      |     |
|-------|----------|-------------------------------------------------------------------------------------|-----------------|-------------------------------|---------|--------------|----------------------|-----|
| MM04T | MAPK8IP2 | mitogen-activated protein kinase 8 interacting protein 2                            | ENST00000329492 | chr22_51042329-51042329_C_T   | 201R>C  | Substitution | Nonsynonymous coding | 20% |
| MM04T | MAPKAPK3 | mitogen-activated protein kinase-activated protein kinase 3                         | CCDS2832.1      | chr3_50683163-50683163_G_T    | 217E>D  | Substitution | Nonsynonymous coding | 16% |
| MM04T | MAPRE1   | microtubule-associated protein, RP/EB family, member 1                              | CCDS13208.1     | chr20_31424651-31424651_A_C   | NA      | Substitution | Splice site donor    | 19% |
| MM04T | MAPT     | microtubule-associated protein tau                                                  | CCDS45715.1     | chr17_44061192-44061192_C_A   | 341S>Y  | Substitution | Nonsynonymous coding | 25% |
| MM04T | MAPT     | microtubule-associated protein tau                                                  | CCDS45715.1     | chr17_44067392-44067392_C_A   | 444S>Y  | Substitution | Nonsynonymous coding | 25% |
| MM04T | MARCKS   | myristoylated alanine-rich protein kinase C substrate                               | CCDS5101.1      | chr6_114181513-114181513_G_A  | 253D>N  | Substitution | Nonsynonymous coding | 26% |
| MM04T | MARK2    | MAP/microtubule affinity-regulating kinase 2                                        | CCDS41665.1     | chr11_63676642-63676642_G_A   | 724R>Q  | Substitution | Nonsynonymous coding | 35% |
| MM04T | MARK2    | MAP/microtubule affinity-regulating kinase 2                                        | NM_001039469    | chr11_63662630-63662630_G_A   | NA      | Substitution | Splice site acceptor | 61% |
| MM04T | MARK3    | MAP/microtubule affinity-regulating kinase 3                                        | CCDS45165.1     | chr14_103932133-103932133_A_T | NA      | Substitution | Splice site donor    | 32% |
| MM04T | MARK4    | MAP/microtubule affinity-regulating kinase 4                                        | CCDS12658.1     | chr19_45801448-45801448_C_T   | 642S>L  | Substitution | Nonsynonymous coding | 30% |
| MM04T | MARS2    | methionyl-tRNA synthetase 2, mitochondrial                                          | CCDS33358.1     | chr2_198570529-198570529_G_T  | 134D>Y  | Substitution | Nonsynonymous coding | 25% |
| MM04T | MAS1L    | MAS1 oncogene-like                                                                  | CCDS4661.1      | chr6_29455628-29455628_A_G    | 18F>L   | Substitution | Nonsynonymous coding | 18% |
| MM04T | MASP1    | mannan-binding lectin serine peptidase 1 (C4/C2 activating component of Ra-reactive | CCDS33908.1     | chr3_186969513-186969513_G_T  | 307P>H  | Substitution | Nonsynonymous coding | 22% |
| MM04T | MASP2    | mannan-binding lectin serine peptidase 2                                            | CCDS123.1       | chr1_11087510-11087510_C_T    | 498R>Q  | Substitution | Nonsynonymous coding | 34% |
| MM04T | MAST2    | microtubule associated serine/threonine kinase 2                                    | CCDS41326.1     | chr1_46348061-46348061_G_A    | 165G>D  | Substitution | Nonsynonymous coding | 27% |
| MM04T | MAST4    | microtubule associated serine/threonine kinase family member 4                      | CCDS47225.1     | chr5_66461609-66461609_G_A    | 2012G>D | Substitution | Nonsynonymous coding | 19% |
| MM04T | MASTL    | microtubule associated serine/threonine kinase-like                                 | CCDS7153.1      | chr10_27459657-27459657_C_A   | 590S>X  | Substitution | Nonsense             | 25% |
| MM04T | MAT2A    | methionine adenosyltransferase II, alpha                                            | CCDS1977.1      | chr2_85768837-85768837_G_T    | 125R>I  | Substitution | Nonsynonymous coding | 18% |
| MM04T | MATN3    | matrilin 3                                                                          | CCDS46226.1     | chr2_20202946-20202946_T_C    | 298N>D  | Substitution | Nonsynonymous coding | 18% |
| MM04T | MB21D2   | Mab-21 domain containing 2                                                          | CCDS3302.2      | chr3_192516963-192516963_G_A  | 230R>C  | Substitution | Nonsynonymous coding | 40% |
| MM04T | MBD4     | methyl-CpG binding domain protein 4                                                 | CCDS3058.1      | chr3_129155864-129155864_G_T  | 208T>N  | Substitution | Nonsynonymous coding | 34% |
| MM04T | MBD5     | methyl-CpG binding domain protein 5                                                 | CCDS33302.1     | chr2_149247795-149247795_C_T  | 1299R>W | Substitution | Nonsynonymous coding | 24% |
| MM04T | MBOAT2   | membrane bound O-acyltransferase domain containing 2                                | CCDS1660.1      | chr2_8998822-8998822_G_T      | 517S>X  | Substitution | Nonsense             | 21% |
| MM04T | MBOAT4   | membrane bound O-acyltransferase domain containing 4                                | CCDS47835.1     | chr8_29989535-29989535_G_A    | 411S>L  | Substitution | Nonsynonymous coding | 24% |
| MM04T | MBP      | myelin basic protein                                                                | ENST00000397869 | chr18_74700368-74700368_G_A   | 145S>L  | Substitution | Nonsynonymous coding | 12% |
| MM04T | MBTPS1   | membrane-bound transcription factor peptidase, site 1                               | CCDS10941.1     | chr16_84132690-84132690_C_T   | 130R>Q  | Substitution | Nonsynonymous coding | 34% |
| MM04T | MBTPS1   | membrane-bound transcription factor peptidase, site 1                               | CCDS10941.1     | chr16_84132822-84132822_C_A   | 86R>I   | Substitution | Nonsynonymous coding | 28% |
| MM04T | MBTPS2   | membrane-bound transcription factor peptidase, site 2                               | CCDS14201.1     | chrX_21869702-21869702_G_T    | 172E>X  | Substitution | Nonsense             | 21% |
| MM04T | MC1R     | melanocortin 1 receptor (alpha melanocyte stimulating hormone receptor)             | NM_002386       | chr16_89986439-89986439_T_C   | 258F>S  | Substitution | Nonsynonymous coding | 32% |
| MM04T | MC4R     | melanocortin 4 receptor                                                             | CCDS11976.1     | chr18_58039473-58039473_T_C   | 37D>G   | Substitution | Nonsynonymous coding | 21% |
| MM04T | MCF2     | MCF.2 cell line derived transforming sequence                                       | CCDS48175.1     | chrX_138669893-138669893_G_T  | 895S>Y  | Substitution | Nonsynonymous coding | 15% |
| MM04T | MCF2     | MCF.2 cell line derived transforming sequence                                       | CCDS48175.1     | chrX_138698599-138698599_G_T  | 405L>I  | Substitution | Nonsynonymous coding | 18% |

|       |        |                                                                   |                 |                               |         |              |                      |     |
|-------|--------|-------------------------------------------------------------------|-----------------|-------------------------------|---------|--------------|----------------------|-----|
| MM04T | MCF2   | MCF.2 cell line derived transforming sequence                     | CCDS48175.1     | chrX_138711973-138711973_C_A  | 167E>X  | Substitution | Nonsense             | 32% |
| MM04T | MCF2L  | MCF.2 cell line derived transforming sequence-like                | CCDS45070.1     | chr13_113724410-113724410_G_A | 364D>N  | Substitution | Nonsynonymous coding | 30% |
| MM04T | MCF2L2 | MCF.2 cell line derived transforming sequence-like 2              | CCDS3243.1      | chr3_183027524-183027524_T_G  | 365K>Q  | Substitution | Nonsynonymous coding | 41% |
| MM04T | MCF2L2 | MCF.2 cell line derived transforming sequence-like 2              | CCDS3243.1      | chr3_183097151-183097151_G_A  | 70S>L   | Substitution | Nonsynonymous coding | 33% |
| MM04T | MCF2L2 | MCF.2 cell line derived transforming sequence-like 2              | CCDS3243.1      | chr3_183028701-183028701_A_G  | NA      | Substitution | Splice site donor    | 51% |
| MM04T | MCM10  | minichromosome maintenance complex component 10                   | CCDS7096.1      | chr10_13237180-13237180_C_T   | 630R>X  | Substitution | Nonsense             | 25% |
| MM04T | MCM3AP | minichromosome maintenance complex component 3 associated protein | CCDS13734.1     | chr21_47695227-47695227_C_A   | 624R>I  | Substitution | Nonsynonymous coding | 22% |
| MM04T | MCM3AP | minichromosome maintenance complex component 3 associated protein | CCDS13734.1     | chr21_47704855-47704855_T_C   | 116T>A  | Substitution | Nonsynonymous coding | 41% |
| MM04T | MCM4   | minichromosome maintenance complex component 4                    | CCDS6143.1      | chr8_48878971-48878971_C_T    | NA      | Substitution | Splice site donor    | 38% |
| MM04T | MCM8   | minichromosome maintenance complex component 8                    | CCDS13094.1     | chr20_5974327-5974327_G_T     | 806E>X  | Substitution | Nonsense             | 63% |
| MM04T | MCOLN1 | mucolipin 1                                                       | CCDS12180.1     | chr19_7593569-7593569_C_T     | 322R>X  | Substitution | Nonsense             | 33% |
| MM04T | MCOLN3 | mucolipin 3                                                       | CCDS701.1       | chr1_85510812-85510812_T_G    | NA      | Substitution | Splice site donor    | 31% |
| MM04T | MCTP1  | multiple C2 domains, transmembrane 1                              | CCDS34203.1     | chr5_94289024-94289024_C_A    | 294E>X  | Substitution | Nonsense             | 23% |
| MM04T | MCTP2  | multiple C2 domains, transmembrane 2                              | CCDS32338.1     | chr15_95001462-95001462_G_A   | 783E>K  | Substitution | Nonsynonymous coding | 36% |
| MM04T | MDGA2  | MAM domain containing glycosylphosphatidylinositol anchor 2       | ENST00000399222 | chr14_47566339-47566339_A_C   | NA      | Substitution | Splice site acceptor | 31% |
| MM04T | MDGA2  | MAM domain containing glycosylphosphatidylinositol anchor 2       | CCDS45098.1     | chr14_47343401-47343401_C_A   | 745E>X  | Substitution | Nonsense             | 47% |
| MM04T | MDN1   | MDN1, midasin homolog (yeast)                                     | CCDS5024.1      | chr6_90372673-90372673_C_A    | 4750E>D | Substitution | Nonsynonymous coding | 32% |
| MM04T | MDN1   | MDN1, midasin homolog (yeast)                                     | CCDS5024.1      | chr6_90450000-90450000_G_A    | 1516R>C | Substitution | Nonsynonymous coding | 33% |
| MM04T | MED12L | mediator complex subunit 12-like                                  | CCDS33876.1     | chr3_151082934-151082934_G_A  | 1007R>H | Substitution | Nonsynonymous coding | 34% |
| MM04T | MED13  | mediator complex subunit 13                                       | CCDS42366.1     | chr17_60039090-60039090_T_G   | 1705E>D | Substitution | Nonsynonymous coding | 36% |
| MM04T | MED13  | mediator complex subunit 13                                       | CCDS42366.1     | chr17_60050234-60050234_C_T   | 1274C>Y | Substitution | Nonsynonymous coding | 28% |
| MM04T | MED13  | mediator complex subunit 13                                       | CCDS42366.1     | chr17_60050217-60050217_G_A   | 1280R>X | Substitution | Nonsense             | 31% |
| MM04T | MED13L | mediator complex subunit 13-like                                  | CCDS9177.1      | chr12_116446456-116446456_C_A | 588E>X  | Substitution | Nonsense             | 35% |
| MM04T | MED25  | mediator complex subunit 25                                       | CCDS33075.1     | chr19_50321714-50321714_A_G   | 39Y>C   | Substitution | Nonsynonymous coding | 25% |
| MM04T | MED6   | mediator complex subunit 6                                        | CCDS9805.1      | chr14_71059612-71059612_C_A   | 151D>Y  | Substitution | Nonsynonymous coding | 28% |
| MM04T | MEDAG  | mesenteric estrogen-dependent adipogenesis                        | CCDS9338.1      | chr13_31480737-31480737_G_A   | 29D>N   | Substitution | Nonsynonymous coding | 24% |
| MM04T | MEF2A  | myocyte enhancer factor 2A                                        | CCDS45362.1     | chr15_100185767-100185767_T_C | 19V>A   | Substitution | Nonsynonymous coding | 67% |
| MM04T | MEF2C  | myocyte enhancer factor 2C                                        | CCDS47245.1     | chr5_88024415-88024415_G_A    | 332S>F  | Substitution | Nonsynonymous coding | 23% |
| MM04T | MEFV   | Mediterranean fever                                               | CCDS10498.1     | chr16_3304380-3304380_C_T     | 230E>K  | Substitution | Nonsynonymous coding | 23% |
| MM04T | MEGF10 | multiple EGF-like-domains 10                                      | CCDS4142.1      | chr5_126791189-126791189_C_T  | 1041P>L | Substitution | Nonsynonymous coding | 20% |
| MM04T | MEGF11 | multiple EGF-like-domains 11                                      | CCDS10213.2     | chr15_66210355-66210355_C_T   | 679D>N  | Substitution | Nonsynonymous coding | 33% |
| MM04T | MEGF11 | multiple EGF-like-domains 11                                      | CCDS10213.2     | chr15_66191072-66191072_C_A   | 990E>X  | Substitution | Nonsense             | 61% |

|       |           |                                                                                        |                 |                               |         |              |                      |     |
|-------|-----------|----------------------------------------------------------------------------------------|-----------------|-------------------------------|---------|--------------|----------------------|-----|
| MM04T | MEGF8     | multiple EGF-like-domains 8                                                            | ENST00000251268 | chr19_42852556-42852556_G_A   | 744V>M  | Substitution | Nonsynonymous coding | 43% |
| MM04T | MEIS1     | Meis homeobox 1                                                                        | CCDS46309.1     | chr2_66667693-66667693_G_T    | NA      | Substitution | Splice site acceptor | 24% |
| MM04T | MEP1A     | meprin A, alpha (PABA peptide hydrolase)                                               | CCDS4918.1      | chr6_46787435-46787435_C_A    | 184L>I  | Substitution | Nonsynonymous coding | 48% |
| MM04T | MEP1B     | meprin A, beta                                                                         | CCDS45846.1     | chr18_29784236-29784236_T_C   | 154F>L  | Substitution | Nonsynonymous coding | 31% |
| MM04T | MEP1B     | meprin A, beta                                                                         | CCDS45846.1     | chr18_29787247-29787247_G_A   | 194D>N  | Substitution | Nonsynonymous coding | 38% |
| MM04T | MERTK     | c-mer proto-oncogene tyrosine kinase                                                   | CCDS2094.1      | chr2_112760755-112760755_C_A  | 593L>M  | Substitution | Nonsynonymous coding | 24% |
| MM04T | METTL10   | methyltransferase like 10                                                              | CCDS31307.1     | chr10_126478849-126478849_C_A | 57E>X   | Substitution | Nonsense             | 18% |
| MM04T | METTL17   | methyltransferase like 17                                                              | CCDS41913.1     | chr14_21464712-21464712_C_A   | 369F>L  | Substitution | Nonsynonymous coding | 39% |
| MM04T | METTL4    | methyltransferase like 4                                                               | CCDS11826.1     | chr18_2566965-2566965_C_T     | 84R>Q   | Substitution | Nonsynonymous coding | 34% |
| MM04T | MFSD11    | major facilitator superfamily domain containing 11                                     | CCDS11750.1     | chr17_74738319-74738319_G_T   | 134R>I  | Substitution | Nonsynonymous coding | 21% |
| MM04T | MFSD6     | major facilitator superfamily domain containing 6                                      | CCDS2306.1      | chr2_191301650-191301650_G_T  | 299E>X  | Substitution | Nonsense             | 39% |
| MM04T | MGA       | MGA, MAX dimerization protein                                                          | NM_001164273    | chr15_42050033-42050033_G_A   | 2396R>Q | Substitution | Nonsynonymous coding | 32% |
| MM04T | MGA       | MGA, MAX dimerization protein                                                          | NM_001164273    | chr15_42052602-42052602_C_T   | 2425R>C | Substitution | Nonsynonymous coding | 33% |
| MM04T | MGA       | MGA, MAX dimerization protein                                                          | NM_001164273    | chr15_42005688-42005688_G_T   | 1142E>X | Substitution | Nonsense             | 11% |
| MM04T | MGAM      | maltase-glucoamylase (alpha-glycosidase)                                               | CCDS47727.1     | chr7_141747643-141747643_G_T  | 853E>X  | Substitution | Nonsense             | 15% |
| MM04T | MGAT1     | mannosyl (alpha-1,3-)-glycoprotein beta-1,2-N-acetylglucosaminyltransferase            | CCDS4458.1      | chr5_180219314-180219314_C_T  | 220E>K  | Substitution | Nonsynonymous coding | 23% |
| MM04T | MGAT4A    | mannosyl (alpha-1,3-)-glycoprotein beta-1,4-N-acetylglucosaminyltransferase, isozyme A | CCDS2036.1      | chr2_99242211-99242211_G_T    | 519S>Y  | Substitution | Nonsynonymous coding | 15% |
| MM04T | MGAT4C    | mannosyl (alpha-1,3-)-glycoprotein beta-1,4-N-acetylglucosaminyltransferase, isozyme C | CCDS9030.1      | chr12_86373822-86373822_G_A   | 228R>X  | Substitution | Nonsense             | 31% |
| MM04T | MGEA5     | meningioma expressed antigen 5 (hyaluronidase)                                         | CCDS7520.1      | chr10_103563740-103563740_G_T | 263S>Y  | Substitution | Nonsynonymous coding | 22% |
| MM04T | MGME1     | mitochondrial genome maintenance exonuclease 1                                         | CCDS13131.1     | chr20_17950518-17950518_T_C   | 6F>L    | Substitution | Nonsynonymous coding | 33% |
| MM04T | MI0003758 | -                                                                                      | hsa-mir-1264    | chrX_113887182-113887182_T_G  | 18L>W   | Substitution | Nonsynonymous coding | 33% |
| MM04T | MIA2      | melanoma inhibitory activity 2                                                         | CCDS9672.1      | chr14_39716960-39716960_A_C   | 394K>N  | Substitution | Nonsynonymous coding | 32% |
| MM04T | MIA2      | melanoma inhibitory activity 2                                                         | CCDS9672.1      | chr14_39717203-39717203_G_T   | 475K>N  | Substitution | Nonsynonymous coding | 25% |
| MM04T | MIA3      | melanoma inhibitory activity family, member 3                                          | CCDS41470.1     | chr1_222803042-222803042_G_A  | 827R>Q  | Substitution | Nonsynonymous coding | 30% |
| MM04T | MICAL1    | microtubule associated monooxygenase, calponin and LIM domain containing 1             | CCDS5076.1      | chr6_109769493-109769493_C_T  | 590A>T  | Substitution | Nonsynonymous coding | 35% |
| MM04T | MICAL3    | microtubule associated monooxygenase, calponin and LIM domain containing 3             | CCDS46659.1     | chr22_18379714-18379714_C_T   | 328E>K  | Substitution | Nonsynonymous coding | 40% |
| MM04T | MICALCL   | MICAL C-terminal like                                                                  | CCDS41620.1     | chr11_12316174-12316174_C_A   | 399S>Y  | Substitution | Nonsynonymous coding | 23% |
| MM04T | MICALCL   | MICAL C-terminal like                                                                  | CCDS41620.1     | chr11_12315873-12315873_G_T   | 299E>X  | Substitution | Nonsense             | 33% |
| MM04T | MID1      | midline 1 (Opitz/BBB syndrome)                                                         | CCDS14138.1     | chrX_10535512-10535512_C_T    | 26A>T   | Substitution | Nonsynonymous coding | 29% |
| MM04T | MID1IP1   | MID1 interacting protein 1                                                             | CCDS14249.1     | chrX_38664503-38664503_G_A    | 102E>K  | Substitution | Nonsynonymous coding | 23% |
| MM04T | MIER1     | mesoderm induction early response 1 homolog (Xenopus laevis)                           | CCDS41348.1     | chr1_67423799-67423799_C_T    | 80R>X   | Substitution | Nonsense             | 21% |
| MM04T | MINK1     | misshapen-like kinase 1                                                                | CCDS45588.1     | chr17_4789457-4789457_C_A     | 246P>H  | Substitution | Nonsynonymous coding | 36% |

|       |          |                                                                            |                 |                               |         |              |                      |     |
|-------|----------|----------------------------------------------------------------------------|-----------------|-------------------------------|---------|--------------|----------------------|-----|
| MM04T | MINK1    | misshapen-like kinase 1                                                    | CCDS45588.1     | chr17_4799301-4799301_A_C     | 1123K>T | Substitution | Nonsynonymous coding | 31% |
| MM04T | MINK1    | misshapen-like kinase 1                                                    | CCDS45588.1     | chr17_4788301-4788301_C_T     | NA      | Substitution | Splice site donor    | 16% |
| MM04T | MIR10B   | microRNA 10b                                                               | hsa-mir-10b     | chr2_177015125-177015125_C_T  | 32S>L   | Substitution | Nonsynonymous coding | 36% |
| MM04T | MIR133B  | microRNA 133b                                                              | hsa-mir-133b    | chr6_52013755-52013755_C_T    | 12S>L   | Substitution | Nonsynonymous coding | 21% |
| MM04T | MIR146B  | microRNA 146b                                                              | hsa-mir-146b    | chr10_104196331-104196331_C_A | 21F>L   | Substitution | Nonsynonymous coding | 32% |
| MM04T | MIR409   | microRNA 409                                                               | hsa-mir-409     | chr14_101531680-101531680_G_A | 15R>Q   | Substitution | Nonsynonymous coding | 14% |
| MM04T | MIR448   | microRNA 448                                                               | hsa-mir-448     | chrX_114058123-114058123_C_T  | 36S>L   | Substitution | Nonsynonymous coding | 34% |
| MM04T | MIR499A  | microRNA 499a                                                              | hsa-mir-499     | chr20_33578215-33578215_G_A   | 13D>N   | Substitution | Nonsynonymous coding | 26% |
| MM04T | MIR595   | microRNA 595                                                               | hsa-mir-595     | chr7_158325421-158325421_C_A  | 29G>X   | Substitution | Nonsense             | 31% |
| MM04T | MIR657   | microRNA 657                                                               | hsa-mir-657     | chr17_79099165-79099165_C_A   | 3*>Y    | Substitution | Nonsynonymous coding | 19% |
| MM04T | MIS18BP1 | MIS18 binding protein 1                                                    | CCDS9684.1      | chr14_45687589-45687589_C_T   | 913R>Q  | Substitution | Nonsynonymous coding | 24% |
| MM04T | MIS18BP1 | MIS18 binding protein 1                                                    | CCDS9684.1      | chr14_45700468-45700468_T_G   | 490Q>H  | Substitution | Nonsynonymous coding | 19% |
| MM04T | MKI67    | antigen identified by monoclonal antibody Ki-67                            | CCDS7659.1      | chr10_129900863-129900863_C_A | 3081D>Y | Substitution | Nonsynonymous coding | 24% |
| MM04T | MKI67    | antigen identified by monoclonal antibody Ki-67                            | CCDS7659.1      | chr10_129905984-129905984_C_T | 1374E>K | Substitution | Nonsynonymous coding | 28% |
| MM04T | MKI67    | antigen identified by monoclonal antibody Ki-67                            | CCDS7659.1      | chr10_129910636-129910636_A_G | 577V>A  | Substitution | Nonsynonymous coding | 32% |
| MM04T | MKI67    | antigen identified by monoclonal antibody Ki-67                            | CCDS7659.1      | chr10_129913277-129913277_C_A | 465E>D  | Substitution | Nonsynonymous coding | 23% |
| MM04T | MKI67    | antigen identified by monoclonal antibody Ki-67                            | CCDS7659.1      | chr10_129907286-129907286_C_A | 940E>X  | Substitution | Nonsense             | 23% |
| MM04T | MKLN1    | muskelin 1, intracellular mediator containing kelch motifs                 | CCDS34754.1     | chr7_131122670-131122670_C_T  | 363R>C  | Substitution | Nonsynonymous coding | 30% |
| MM04T | MKRN3    | makorin ring finger protein 3                                              | CCDS10013.1     | chr15_23812057-23812057_C_A   | 376F>L  | Substitution | Nonsynonymous coding | 22% |
| MM04T | MKRN3    | makorin ring finger protein 3                                              | CCDS10013.1     | chr15_23812278-23812278_G_A   | 450R>Q  | Substitution | Nonsynonymous coding | 29% |
| MM04T | MLF1     | myeloid leukemia factor 1                                                  | CCDS3182.1      | chr3_158314716-158314716_G_T  | 87Q>H   | Substitution | Nonsynonymous coding | 21% |
| MM04T | MLH3     | mutL homolog 3 (E. coli)                                                   | CCDS32123.1     | chr14_75513186-75513186_A_G   | 1058V>A | Substitution | Nonsynonymous coding | 28% |
| MM04T | MLKL     | mixed lineage kinase domain-like                                           | CCDS32487.1     | chr16_74706405-74706405_C_A   | 471K>N  | Substitution | Nonsynonymous coding | 38% |
| MM04T | MLL      | myeloid/lymphoid or mixed-lineage leukemia (trithorax homolog, Drosophila) | ENST00000328469 | chr11_118309767-118309767_G_T | 154R>I  | Substitution | Nonsynonymous coding | 24% |
| MM04T | MLL3     | myeloid/lymphoid or mixed-lineage leukemia 3                               | CCDS5931.1      | chr7_151846237-151846237_C_T  | 4259E>K | Substitution | Nonsynonymous coding | 33% |
| MM04T | MLL3     | myeloid/lymphoid or mixed-lineage leukemia 3                               | ENST00000355193 | chr7_151854911-151854911_G_T  | 3926L>I | Substitution | Nonsynonymous coding | 40% |
| MM04T | MLXIP    | MLX interacting protein                                                    | NM_014938       | chr12_122517176-122517176_G_T | NA      | Substitution | Splice site donor    | 25% |
| MM04T | MLXIP    | MLX interacting protein                                                    | ENST00000377037 | chr12_122618672-122618672_G_T | 214E>X  | Substitution | Nonsense             | 22% |
| MM04T | MLXIPL   | MLX interacting protein-like                                               | CCDS5553.1      | chr7_73021731-73021731_T_G    | 168N>T  | Substitution | Nonsynonymous coding | 37% |
| MM04T | MMEL1    | membrane metallo-endopeptidase-like 1                                      | CCDS30569.1     | chr1_2537716-2537716_C_A      | 232D>Y  | Substitution | Nonsynonymous coding | 23% |
| MM04T | MMP1     | matrix metalloproteinase 1 (interstitial collagenase)                      | CCDS8322.1      | chr11_102667505-102667505_G_T | 172S>Y  | Substitution | Nonsynonymous coding | 25% |
| MM04T | MMP20    | matrix metalloproteinase 20                                                | CCDS8318.1      | chr11_102449795-102449795_T_G | 442Q>H  | Substitution | Nonsynonymous coding | 35% |

|       |           |                                                                                       |             |                               |         |              |                      |     |
|-------|-----------|---------------------------------------------------------------------------------------|-------------|-------------------------------|---------|--------------|----------------------|-----|
| MM04T | MMP24     | matrix metallopeptidase 24 (membrane-inserted)                                        | CCDS46593.1 | chr20_33842305-33842305_C_T   | 189R>C  | Substitution | Nonsynonymous coding | 32% |
| MM04T | MMP24     | matrix metallopeptidase 24 (membrane-inserted)                                        | CCDS46593.1 | chr20_33851731-33851731_C_A   | 319L>I  | Substitution | Nonsynonymous coding | 16% |
| MM04T | MMP27     | matrix metallopeptidase 27                                                            | CCDS8319.1  | chr11_102564733-102564733_G_A | 366T>I  | Substitution | Nonsynonymous coding | 36% |
| MM04T | MMP7      | matrix metallopeptidase 7 (matrilysin, uterine)                                       | CCDS8317.1  | chr11_102398389-102398389_G_T | 117T>N  | Substitution | Nonsynonymous coding | 23% |
| MM04T | MMP9      | matrix metallopeptidase 9 (gelatinase B, 92kDa gelatinase, 92kDa type IV collagenase) | CCDS13390.1 | chr20_44637665-44637665_G_T   | 34D>Y   | Substitution | Nonsynonymous coding | 12% |
| MM04T | MMRN2     | multimerin 2                                                                          | CCDS7379.1  | chr10_88696562-88696562_A_G   | 930S>P  | Substitution | Nonsynonymous coding | 24% |
| MM04T | MNAT1     | menage a trois homolog 1, cyclin H assembly factor ( <i>Xenopus laevis</i> )          | CCDS9750.1  | chr14_61264824-61264824_G_T   | 88D>Y   | Substitution | Nonsynonymous coding | 26% |
| MM04T | MNDA      | myeloid cell nuclear differentiation antigen                                          | CCDS1177.1  | chr1_158811968-158811968_C_A  | 9L>I    | Substitution | Nonsynonymous coding | 24% |
| MM04T | MNDA      | myeloid cell nuclear differentiation antigen                                          | CCDS1177.1  | chr1_158817632-158817632_C_T  | 368R>X  | Substitution | Nonsense             | 32% |
| MM04T | MOB3C     | MOB kinase activator 3C                                                               | CCDS539.1   | chr1_47075706-47075706_T_C    | 249S>G  | Substitution | Nonsynonymous coding | 24% |
| MM04T | MOGAT1    | monoacylglycerol O-acyltransferase 1                                                  | CCDS46524.1 | chr2_22359222-22359222_G_A    | 207R>Q  | Substitution | Nonsynonymous coding | 26% |
| MM04T | MOGS      | mannosyl-oligosaccharide glucosidase                                                  | CCDS42700.1 | chr2_74689935-74689935_T_G    | 327K>N  | Substitution | Nonsynonymous coding | 23% |
| MM04T | MON2      | MON2 homolog ( <i>S. cerevisiae</i> )                                                 | CCDS31849.1 | chr12_62943462-62943462_G_A   | 923R>Q  | Substitution | Nonsynonymous coding | 24% |
| MM04T | MORC1     | MORC family CW-type zinc finger 1                                                     | CCDS2955.1  | chr3_108682389-108682389_C_A  | 891D>Y  | Substitution | Nonsynonymous coding | 23% |
| MM04T | MORC1     | MORC family CW-type zinc finger 1                                                     | CCDS2955.1  | chr3_108780857-108780857_C_A  | 315R>I  | Substitution | Nonsynonymous coding | 17% |
| MM04T | MORC1     | MORC family CW-type zinc finger 1                                                     | CCDS2955.1  | chr3_108819264-108819264_C_A  | 105S>I  | Substitution | Nonsynonymous coding | 15% |
| MM04T | MORC4     | MORC family CW-type zinc finger 4                                                     | CCDS14525.2 | chrX_106184843-106184843_G_A  | 894R>W  | Substitution | Nonsynonymous coding | 25% |
| MM04T | MORC4     | MORC family CW-type zinc finger 4                                                     | CCDS14525.2 | chrX_106186115-106186115_A_C  | 669L>W  | Substitution | Nonsynonymous coding | 41% |
| MM04T | MORC4     | MORC family CW-type zinc finger 4                                                     | CCDS14525.2 | chrX_106224218-106224218_C_T  | 280R>H  | Substitution | Nonsynonymous coding | 27% |
| MM04T | MORN1     | MORN repeat containing 1                                                              | CCDS40.1    | chr1_2268221-2268221_C_A      | 369D>Y  | Substitution | Nonsynonymous coding | 24% |
| MM04T | MORN1     | MORN repeat containing 1                                                              | CCDS40.1    | chr1_2321404-2321404_G_T      | 36F>L   | Substitution | Nonsynonymous coding | 16% |
| MM04T | MPDZ      | multiple PDZ domain protein                                                           | CCDS47951.1 | chr9_13205053-13205053_A_C    | 510L>V  | Substitution | Nonsynonymous coding | 18% |
| MM04T | MPDZ      | multiple PDZ domain protein                                                           | CCDS47951.1 | chr9_13216779-13216779_A_C    | 428I>M  | Substitution | Nonsynonymous coding | 26% |
| MM04T | MPDZ      | multiple PDZ domain protein                                                           | CCDS47951.1 | chr9_13221472-13221472_C_T    | 259E>K  | Substitution | Nonsynonymous coding | 29% |
| MM04T | MPDZ      | multiple PDZ domain protein                                                           | CCDS47951.1 | chr9_13247653-13247653_A_G    | 55V>A   | Substitution | Nonsynonymous coding | 30% |
| MM04T | MPDZ      | multiple PDZ domain protein                                                           | CCDS47951.1 | chr9_13175799-13175799_C_A    | 1003E>X | Substitution | Nonsense             | 43% |
| MM04T | MPEG1     | macrophage expressed 1                                                                | CCDS41650.1 | chr11_58978816-58978816_T_G   | 508E>A  | Substitution | Nonsynonymous coding | 30% |
| MM04T | MPEG1     | macrophage expressed 1                                                                | CCDS41650.1 | chr11_58979143-58979143_T_G   | 399K>T  | Substitution | Nonsynonymous coding | 28% |
| MM04T | MPEG1     | macrophage expressed 1                                                                | CCDS41650.1 | chr11_58980056-58980056_C_A   | 95E>X   | Substitution | Nonsense             | 30% |
| MM04T | MPHOSPH10 | M-phase phosphoprotein 10 (U3 small nucleolar ribonucleoprotein)                      | CCDS1916.1  | chr2_71371596-71371596_A_C    | 495E>D  | Substitution | Nonsynonymous coding | 25% |
| MM04T | MPHOSPH10 | M-phase phosphoprotein 10 (U3 small nucleolar ribonucleoprotein)                      | CCDS1916.1  | chr2_71376534-71376534_C_T    | 616S>L  | Substitution | Nonsynonymous coding | 22% |
| MM04T | MPP4      | membrane protein, palmitoylated 4 (MAGUK p55 subfamily member 4)                      | CCDS46491.1 | chr2_202521082-202521082_C_T  | 380R>H  | Substitution | Nonsynonymous coding | 24% |



|       |         |                                                                  |                 |                              |         |              |                      |     |
|-------|---------|------------------------------------------------------------------|-----------------|------------------------------|---------|--------------|----------------------|-----|
| MM04T | MPP5    | membrane protein, palmitoylated 5 (MAGUK p55 subfamily member 5) | CCDS9779.1      | chr14_67790494-67790494_C_T  | 606R>W  | Substitution | Nonsynonymous coding | 36% |
| MM04T | MPPED1  | metallophosphoesterase domain containing 1                       | CCDS46723.1     | chr22_43870746-43870746_G_T  | 179E>D  | Substitution | Nonsynonymous coding | 26% |
| MM04T | MPRIP   | myosin phosphatase Rho interacting protein                       | ENST00000395806 | chr17_16961002-16961002_G_A  | 59R>Q   | Substitution | Nonsynonymous coding | 28% |
| MM04T | MRAP2   | melanocortin 2 receptor accessory protein 2                      | CCDS5001.1      | chr6_84798828-84798828_G_T   | 82E>D   | Substitution | Nonsynonymous coding | 31% |
| MM04T | MRC2    | mannose receptor, C type 2                                       | CCDS11634.1     | chr17_60753790-60753790_G_A  | 578E>K  | Substitution | Nonsynonymous coding | 11% |
| MM04T | MRC2    | mannose receptor, C type 2                                       | CCDS11634.1     | chr17_60754694-60754694_G_T  | 633K>N  | Substitution | Nonsynonymous coding | 13% |
| MM04T | MRC2    | mannose receptor, C type 2                                       | CCDS11634.1     | chr17_60768086-60768086_C_T  | 1326R>W | Substitution | Nonsynonymous coding | 25% |
| MM04T | MRE11A  | MRE11 meiotic recombination 11 homolog A (S. cerevisiae)         | CCDS8299.1      | chr11_94192676-94192676_C_A  | 466E>D  | Substitution | Nonsynonymous coding | 29% |
| MM04T | MRFAP1  | Morf4 family associated protein 1                                | CCDS3389.1      | chr4_6642794-6642794_A_G     | 69T>A   | Substitution | Nonsynonymous coding | 29% |
| MM04T | MRGPRD  | MAS-related GPR, member D                                        | CCDS31625.1     | chr11_68747623-68747623_A_G  | 278L>P  | Substitution | Nonsynonymous coding | 28% |
| MM04T | MRGPRD  | MAS-related GPR, member D                                        | CCDS31625.1     | chr11_68747955-68747955_G_T  | 167F>L  | Substitution | Nonsynonymous coding | 33% |
| MM04T | MRGPRD  | MAS-related GPR, member D                                        | CCDS31625.1     | chr11_68748293-68748293_G_A  | 55R>X   | Substitution | Nonsense             | 31% |
| MM04T | MRO     | maestro                                                          | CCDS45868.1     | chr18_48333129-48333129_T_G  | 78K>T   | Substitution | Nonsynonymous coding | 33% |
| MM04T | MRPL39  | mitochondrial ribosomal protein L39                              | CCDS33522.1     | chr21_26972176-26972176_T_G  | 175I>L  | Substitution | Nonsynonymous coding | 27% |
| MM04T | MRPS18A | mitochondrial ribosomal protein S18A                             | CCDS4906.1      | chr6_43643331-43643331_G_T   | 92F>L   | Substitution | Nonsynonymous coding | 23% |
| MM04T | MRPS35  | mitochondrial ribosomal protein S35                              | CCDS8714.1      | chr12_27908243-27908243_A_G  | 278I>V  | Substitution | Nonsynonymous coding | 32% |
| MM04T | MRPS5   | mitochondrial ribosomal protein S5                               | CCDS2010.1      | chr2_95756241-95756241_T_C   | 320I>V  | Substitution | Nonsynonymous coding | 29% |
| MM04T | MRS2    | MRS2 magnesium homeostasis factor homolog (S. cerevisiae)        | CCDS4552.1      | chr6_24423172-24423172_G_T   | 372R>I  | Substitution | Nonsynonymous coding | 29% |
| MM04T | MRVI1   | murine retrovirus integration site 1 homolog                     | CCDS44538.1     | chr11_10615134-10615134_G_A  | 685R>W  | Substitution | Nonsynonymous coding | 24% |
| MM04T | MS4A13  | membrane-spanning 4-domains, subfamily A, member 13              | CCDS31571.1     | chr11_60291422-60291422_C_A  | 61S>Y   | Substitution | Nonsynonymous coding | 38% |
| MM04T | MS4A14  | membrane-spanning 4-domains, subfamily A, member 14              | CCDS31569.1     | chr11_60167883-60167883_C_A  | 92L>I   | Substitution | Nonsynonymous coding | 21% |
| MM04T | MS4A14  | membrane-spanning 4-domains, subfamily A, member 14              | CCDS31569.1     | chr11_60184332-60184332_G_T  | 631A>S  | Substitution | Nonsynonymous coding | 30% |
| MM04T | MS4A14  | membrane-spanning 4-domains, subfamily A, member 14              | CCDS31569.1     | chr11_60183849-60183849_G_T  | 470E>X  | Substitution | Nonsense             | 31% |
| MM04T | MS4A15  | membrane-spanning 4-domains, subfamily A, member 15              | CCDS44617.1     | chr11_60531343-60531343_C_A  | 46P>Q   | Substitution | Nonsynonymous coding | 24% |
| MM04T | MSH2    | mutS homolog 2, colon cancer, nonpolyposis type 1 (E. coli)      | CCDS1834.1      | chr2_47690242-47690242_G_T   | 487D>Y  | Substitution | Nonsynonymous coding | 22% |
| MM04T | MSH4    | mutS homolog 4 (E. coli)                                         | CCDS670.1       | chr1_76344775-76344775_G_T   | 547A>S  | Substitution | Nonsynonymous coding | 18% |
| MM04T | MSH5    | mutS homolog 5 (E. coli)                                         | CCDS34409.1     | chr6_31729649-31729649_G_A   | 763E>K  | Substitution | Nonsynonymous coding | 19% |
| MM04T | MSH6    | mutS homolog 6 (E. coli)                                         | CCDS1836.1      | chr2_48027494-48027494_G_A   | 791R>H  | Substitution | Nonsynonymous coding | 25% |
| MM04T | MSH6    | mutS homolog 6 (E. coli)                                         | CCDS1836.1      | chr2_48027887-48027887_G_A   | 922R>Q  | Substitution | Nonsynonymous coding | 30% |
| MM04T | MSH6    | mutS homolog 6 (E. coli)                                         | CCDS1836.1      | chr2_48027844-48027844_G_T   | 908E>X  | Substitution | Nonsense             | 26% |
| MM04T | MSL2    | male-specific lethal 2 homolog (Drosophila)                      | CCDS33861.1     | chr3_135870293-135870293_C_T | 477R>Q  | Substitution | Nonsynonymous coding | 36% |
| MM04T | MSL2    | male-specific lethal 2 homolog (Drosophila)                      | CCDS33861.1     | chr3_135870326-135870326_C_T | 466R>H  | Substitution | Nonsynonymous coding | 36% |

|       |         |                                                                  |                 |                              |         |              |                      |     |
|-------|---------|------------------------------------------------------------------|-----------------|------------------------------|---------|--------------|----------------------|-----|
| MM04T | MSLN    | mesothelin                                                       | CCDS32356.1     | chr16_814646-814646_G_A      | NA      | Substitution | Splice site acceptor | 17% |
| MM04T | MSLNL   | mesothelin-like                                                  | CCDS42093.1     | chr16_830088-830088_G_T      | 305L>I  | Substitution | Nonsynonymous coding | 33% |
| MM04T | MSRB1   | methionine sulfoxide reductase B1                                | ENST00000399753 | chr16_1991235-1991235_C_T    | 76G>E   | Substitution | Nonsynonymous coding | 12% |
| MM04T | MSS51   | MSS51 mitochondrial translational activator                      | CCDS31221.1     | chr10_75188010-75188010_C_A  | 11K>N   | Substitution | Nonsynonymous coding | 42% |
| MM04T | MSX1    | msh homeobox 1                                                   | CCDS3378.2      | chr4_4864605-4864605_T_C     | 216V>A  | Substitution | Nonsynonymous coding | 32% |
| MM04T | MT4     | metallothionein 4                                                | CCDS42165.1     | chr16_56601719-56601719_T_C  | 30Y>H   | Substitution | Nonsynonymous coding | 19% |
| MM04T | MTA2    | metastasis associated 1 family, member 2                         | CCDS8022.1      | chr11_62363550-62363550_G_T  | 349S>Y  | Substitution | Nonsynonymous coding | 24% |
| MM04T | MTA3    | metastasis associated 1 family, member 3                         | ENST00000405094 | chr2_42950146-42950146_G_T   | 577R>I  | Substitution | Nonsynonymous coding | 28% |
| MM04T | MTDH    | metadherin                                                       | CCDS6274.1      | chr8_98699667-98699667_A_C   | 193E>D  | Substitution | Nonsynonymous coding | 28% |
| MM04T | MTERF   | mitochondrial transcription termination factor                   | CCDS5621.1      | chr7_91503069-91503069_C_T   | 347E>K  | Substitution | Nonsynonymous coding | 44% |
| MM04T | MTERF   | mitochondrial transcription termination factor                   | CCDS5621.1      | chr7_91503498-91503498_A_C   | 204F>V  | Substitution | Nonsynonymous coding | 35% |
| MM04T | MTFR1L  | mitochondrial fission regulator 1-like                           | CCDS41284.1     | chr1_26153194-26153194_T_C   | 110S>P  | Substitution | Nonsynonymous coding | 25% |
| MM04T | MTHFD1  | methylenetetrahydrofolate dehydrogenase (NADP+ dependent) 1,     | CCDS9763.1      | chr14_64884651-64884651_A_C  | 175K>T  | Substitution | Nonsynonymous coding | 34% |
| MM04T | MTHFD1  | methylenetetrahydrofolate dehydrogenase (NADP+ dependent) 1,     | CCDS9763.1      | chr14_64916319-64916319_C_A  | 812F>L  | Substitution | Nonsynonymous coding | 35% |
| MM04T | MTHFD1  | methylenetetrahydrofolate dehydrogenase (NADP+ dependent) 1,     | CCDS9763.1      | chr14_64894077-64894077_G_T  | 384E>X  | Substitution | Nonsense             | 35% |
| MM04T | MTHFD1L | methylenetetrahydrofolate dehydrogenase (NADP+ dependent) 1-like | CCDS5228.1      | chr6_151336798-151336798_G_T | 852R>I  | Substitution | Nonsynonymous coding | 34% |
| MM04T | MTIF2   | mitochondrial translational initiation factor 2                  | CCDS1853.1      | chr2_55464464-55464464_T_G   | 657K>N  | Substitution | Nonsynonymous coding | 44% |
| MM04T | MTIF2   | mitochondrial translational initiation factor 2                  | CCDS1853.1      | chr2_55476590-55476590_C_T   | 308D>N  | Substitution | Nonsynonymous coding | 25% |
| MM04T | MTIF2   | mitochondrial translational initiation factor 2                  | CCDS1853.1      | chr2_55476628-55476628_G_A   | 295A>V  | Substitution | Nonsynonymous coding | 29% |
| MM04T | MTIF2   | mitochondrial translational initiation factor 2                  | CCDS1853.1      | chr2_55490957-55490957_C_T   | 13R>Q   | Substitution | Nonsynonymous coding | 13% |
| MM04T | MTIF3   | mitochondrial translational initiation factor 3                  | CCDS9322.1      | chr13_28014341-28014341_A_C  | 82I>S   | Substitution | Nonsynonymous coding | 17% |
| MM04T | MTM1    | myotubularin 1                                                   | CCDS14694.1     | chrX_149818280-149818280_C_A | 320S>Y  | Substitution | Nonsynonymous coding | 16% |
| MM04T | MTM1    | myotubularin 1                                                   | CCDS14694.1     | chrX_149831960-149831960_A_T | 508K>X  | Substitution | Nonsense             | 20% |
| MM04T | MTMR10  | myotubularin related protein 10                                  | CCDS45204.1     | chr15_31282989-31282989_G_T  | 38L>I   | Substitution | Nonsynonymous coding | 33% |
| MM04T | MTMR3   | myotubularin related protein 3                                   | CCDS13870.1     | chr22_30403294-30403294_C_A  | 288S>Y  | Substitution | Nonsynonymous coding | 23% |
| MM04T | MTMR3   | myotubularin related protein 3                                   | CCDS13870.1     | chr22_30415971-30415971_C_A  | 775L>I  | Substitution | Nonsynonymous coding | 35% |
| MM04T | MTMR6   | myotubularin related protein 6                                   | CCDS9313.1      | chr13_25828535-25828535_T_G  | 378K>T  | Substitution | Nonsynonymous coding | 36% |
| MM04T | MTMR7   | myotubularin related protein 7                                   | CCDS34851.1     | chr8_17166826-17166826_C_A   | 371E>X  | Substitution | Nonsense             | 28% |
| MM04T | MTMR8   | myotubularin related protein 8                                   | CCDS14379.1     | chrX_63551450-63551450_G_A   | 447R>W  | Substitution | Nonsynonymous coding | 31% |
| MM04T | MTMR8   | myotubularin related protein 8                                   | CCDS14379.1     | chrX_63557180-63557180_C_A   | 357D>Y  | Substitution | Nonsynonymous coding | 21% |
| MM04T | MTMR8   | myotubularin related protein 8                                   | CCDS14379.1     | chrX_63488418-63488418_C_A   | 705*>L  | Substitution | Nonsynonymous coding | 14% |
| MM04T | MTOR    | mechanistic target of rapamycin (serine/threonine kinase)        | CCDS127.1       | chr1_11190630-11190630_C_T   | 1857E>K | Substitution | Nonsynonymous coding | 23% |

|       |        |                                                           |                 |                               |          |              |                      |     |
|-------|--------|-----------------------------------------------------------|-----------------|-------------------------------|----------|--------------|----------------------|-----|
| MM04T | MTOR   | mechanistic target of rapamycin (serine/threonine kinase) | CCDS127.1       | chr1_11273473-11273473_G_A    | 1090R>C  | Substitution | Nonsynonymous coding | 23% |
| MM04T | MTR    | 5-methyltetrahydrofolate-homocysteine methyltransferase   | CCDS1614.1      | chr1_236972052-236972052_G_A  | 130E>K   | Substitution | Nonsynonymous coding | 33% |
| MM04T | MTR    | 5-methyltetrahydrofolate-homocysteine methyltransferase   | CCDS1614.1      | chr1_237044084-237044084_G_T  | 875R>I   | Substitution | Nonsynonymous coding | 22% |
| MM04T | MTUS1  | microtubule associated tumor suppressor 1                 | CCDS43717.1     | chr8_17581243-17581243_C_A    | 796R>M   | Substitution | Nonsynonymous coding | 29% |
| MM04T | MUC16  | mucin 16, cell surface associated                         | NM_024690       | chr19_9047532-9047532_T_G     | 11367N>H | Substitution | Nonsynonymous coding | 36% |
| MM04T | MUC16  | mucin 16, cell surface associated                         | NM_024690       | chr19_9060072-9060072_C_A     | 9125R>I  | Substitution | Nonsynonymous coding | 18% |
| MM04T | MUC16  | mucin 16, cell surface associated                         | NM_024690       | chr19_9060192-9060192_G_T     | 9085S>Y  | Substitution | Nonsynonymous coding | 33% |
| MM04T | MUC16  | mucin 16, cell surface associated                         | NM_024690       | chr19_9069388-9069388_T_A     | 6020N>Y  | Substitution | Nonsynonymous coding | 21% |
| MM04T | MUC16  | mucin 16, cell surface associated                         | NM_024690       | chr19_9083766-9083766_C_A     | 2683E>D  | Substitution | Nonsynonymous coding | 23% |
| MM04T | MUC16  | mucin 16, cell surface associated                         | NM_024690       | chr19_9090941-9090941_C_T     | 292D>N   | Substitution | Nonsynonymous coding | 37% |
| MM04T | MUC16  | mucin 16, cell surface associated                         | NM_024690       | chr19_9049935-9049935_C_A     | 10566E>X | Substitution | Nonsense             | 22% |
| MM04T | MUC17  | mucin 17, cell surface associated                         | CCDS34711.1     | chr7_100675256-100675256_C_T  | 187P>S   | Substitution | Nonsynonymous coding | 27% |
| MM04T | MUC17  | mucin 17, cell surface associated                         | CCDS34711.1     | chr7_100675296-100675296_C_A  | 200T>N   | Substitution | Nonsynonymous coding | 30% |
| MM04T | MUC2   | mucin 2, oligomeric mucus/gel-forming                     | NM_002457       | chr11_1095207-1095207_C_A     | 2005F>L  | Substitution | Nonsynonymous coding | 23% |
| MM04T | MUC2   | mucin 2, oligomeric mucus/gel-forming                     | NM_002457       | chr11_1099512-1099512_G_T     | 2447K>N  | Substitution | Nonsynonymous coding | 15% |
| MM04T | MUC5B  | mucin 5B, oligomeric mucus/gel-forming                    | CCDS44515.1     | chr11_1262666-1262666_A_C     | 1522K>T  | Substitution | Nonsynonymous coding | 23% |
| MM04T | MUL1   | mitochondrial E3 ubiquitin protein ligase 1               | CCDS208.1       | chr1_20827284-20827284_C_T    | 320V>I   | Substitution | Nonsynonymous coding | 22% |
| MM04T | MUL1   | mitochondrial E3 ubiquitin protein ligase 1               | CCDS208.1       | chr1_20834462-20834462_G_T    | 19S>Y    | Substitution | Nonsynonymous coding | 26% |
| MM04T | MUM1L1 | melanoma associated antigen (mutated) 1-like 1            | ENST00000337685 | chrX_105450752-105450752_T_G  | 443L>V   | Substitution | Nonsynonymous coding | 47% |
| MM04T | MUT    | methylmalonyl CoA mutase                                  | CCDS4924.1      | chr6_49425654-49425654_T_C    | 168E>G   | Substitution | Nonsynonymous coding | 26% |
| MM04T | MUT    | methylmalonyl CoA mutase                                  | CCDS4924.1      | chr6_49425418-49425418_C_A    | 247E>X   | Substitution | Nonsense             | 44% |
| MM04T | MYBPC1 | myosin binding protein C, slow type                       | CCDS9083.1      | chr12_102040632-102040632_G_T | 353D>Y   | Substitution | Nonsynonymous coding | 25% |
| MM04T | MYBPC1 | myosin binding protein C, slow type                       | CCDS9083.1      | chr12_102061599-102061599_C_T | 816R>C   | Substitution | Nonsynonymous coding | 30% |
| MM04T | MYBPC1 | myosin binding protein C, slow type                       | CCDS9083.1      | chr12_102071026-102071026_T_C | 988V>A   | Substitution | Nonsynonymous coding | 37% |
| MM04T | MYBPC1 | myosin binding protein C, slow type                       | CCDS9083.1      | chr12_102028331-102028331_G_A | NA       | Substitution | Splice site acceptor | 20% |
| MM04T | MYBPC2 | myosin binding protein C, fast type                       | CCDS46152.1     | chr19_50946847-50946847_G_T   | 333E>D   | Substitution | Nonsynonymous coding | 26% |
| MM04T | MYCBP2 | MYC binding protein 2, E3 ubiquitin protein ligase        | CCDS31994.1     | chr13_77672270-77672270_G_T   | 2969L>I  | Substitution | Nonsynonymous coding | 24% |
| MM04T | MYCBP2 | MYC binding protein 2, E3 ubiquitin protein ligase        | CCDS31994.1     | chr13_77779656-77779656_T_G   | 1185M>L  | Substitution | Nonsynonymous coding | 33% |
| MM04T | MYH14  | myosin, heavy chain 14, non-muscle                        | CCDS46151.1     | chr19_50766627-50766627_G_A   | 849A>T   | Substitution | Nonsynonymous coding | 22% |
| MM04T | MYH15  | myosin, heavy chain 15                                    | CCDS43127.1     | chr3_108127129-108127129_C_T  | 1560E>K  | Substitution | Nonsynonymous coding | 18% |
| MM04T | MYH15  | myosin, heavy chain 15                                    | CCDS43127.1     | chr3_108163501-108163501_G_T  | 901L>I   | Substitution | Nonsynonymous coding | 31% |
| MM04T | MYH15  | myosin, heavy chain 15                                    | CCDS43127.1     | chr3_108188894-108188894_C_A  | 537E>X   | Substitution | Nonsense             | 24% |

|       |        |                                                                 |              |                               |         |              |                      |     |
|-------|--------|-----------------------------------------------------------------|--------------|-------------------------------|---------|--------------|----------------------|-----|
| MM04T | MYH2   | myosin, heavy chain 2, skeletal muscle, adult                   | CCDS11156.1  | chr17_10438680-10438680_C_A   | 659E>D  | Substitution | Nonsynonymous coding | 39% |
| MM04T | MYH6   | myosin, heavy chain 6, cardiac muscle, alpha                    | CCDS9600.1   | chr14_23866232-23866232_C_T   | 703G>D  | Substitution | Nonsynonymous coding | 25% |
| MM04T | MYH7   | myosin, heavy chain 7, cardiac muscle, beta                     | CCDS9601.1   | chr14_23885392-23885392_G_A   | 1592R>W | Substitution | Nonsynonymous coding | 46% |
| MM04T | MYH7B  | myosin, heavy chain 7B, cardiac muscle, beta                    | CCDS42869.1  | chr20_33588569-33588569_A_G   | NA      | Substitution | Splice site acceptor | 20% |
| MM04T | MYH9   | myosin, heavy chain 9, non-muscle                               | CCDS13927.1  | chr22_36689402-36689402_C_A   | 1356E>D | Substitution | Nonsynonymous coding | 19% |
| MM04T | MYLK   | myosin light chain kinase                                       | CCDS46896.1  | chr3_123457901-123457901_A_C  | 144F>C  | Substitution | Nonsynonymous coding | 20% |
| MM04T | MYLK3  | myosin light chain kinase 3                                     | CCDS10723.2  | chr16_46781973-46781973_C_A   | 45D>Y   | Substitution | Nonsynonymous coding | 32% |
| MM04T | MYLK4  | myosin light chain kinase family, member 4                      | CCDS34330.1  | chr6_2671569-2671569_C_T      | 378R>H  | Substitution | Nonsynonymous coding | 35% |
| MM04T | MYO15A | myosin XVA                                                      | CCDS42271.1  | chr17_18058038-18058038_G_T   | 2731E>D | Substitution | Nonsynonymous coding | 21% |
| MM04T | MYO16  | myosin XVI                                                      | CCDS32008.1  | chr13_109379923-109379923_C_T | 145L>F  | Substitution | Nonsynonymous coding | 41% |
| MM04T | MYO16  | myosin XVI                                                      | CCDS32008.1  | chr13_109792641-109792641_G_A | 1339D>N | Substitution | Nonsynonymous coding | 26% |
| MM04T | MYO16  | myosin XVI                                                      | CCDS32008.1  | chr13_109859049-109859049_C_A | 1814D>E | Substitution | Nonsynonymous coding | 32% |
| MM04T | MYO16  | myosin XVI                                                      | CCDS32008.1  | chr13_109817299-109817299_G_T | 1717E>X | Substitution | Nonsense             | 16% |
| MM04T | MYO18A | myosin XVIII A                                                  | CCDS45642.1  | chr17_27443474-27443474_C_T   | NA      | Substitution | Splice site acceptor | 28% |
| MM04T | MYO18B | myosin XVIII B                                                  | NM_032608    | chr22_26176035-26176035_G_A   | 694R>Q  | Substitution | Nonsynonymous coding | 39% |
| MM04T | MYO1A  | myosin IA                                                       | CCDS8929.1   | chr12_57430850-57430850_C_T   | 694R>H  | Substitution | Nonsynonymous coding | 29% |
| MM04T | MYO1A  | myosin IA                                                       | CCDS8929.1   | chr12_57435261-57435261_C_A   | 373K>N  | Substitution | Nonsynonymous coding | 11% |
| MM04T | MYO1H  | myosin IH                                                       | NM_001101421 | chr12_109834312-109834312_T_G | 122F>L  | Substitution | Nonsynonymous coding | 39% |
| MM04T | MYO3A  | myosin III A                                                    | CCDS7148.1   | chr10_26357713-26357713_A_G   | 357Q>R  | Substitution | Nonsynonymous coding | 38% |
| MM04T | MYO3A  | myosin III A                                                    | CCDS7148.1   | chr10_26414440-26414440_G_A   | 673D>N  | Substitution | Nonsynonymous coding | 29% |
| MM04T | MYO3B  | myosin III B                                                    | CCDS42773.1  | chr2_171356234-171356234_G_A  | 1069A>T | Substitution | Nonsynonymous coding | 40% |
| MM04T | MYO5B  | myosin VB                                                       | CCDS42436.1  | chr18_47488689-47488689_C_T   | 498D>N  | Substitution | Nonsynonymous coding | 32% |
| MM04T | MYO5B  | myosin VB                                                       | CCDS42436.1  | chr18_47500907-47500907_G_A   | 379R>C  | Substitution | Nonsynonymous coding | 29% |
| MM04T | MYO7A  | myosin VII A                                                    | NM_000260    | chr11_76924066-76924066_G_A   | 2142D>N | Substitution | Nonsynonymous coding | 25% |
| MM04T | MYO7A  | myosin VII A                                                    | NM_000260    | chr11_76903216-76903216_G_T   | 1349E>X | Substitution | Nonsense             | 19% |
| MM04T | MYO7B  | myosin VII B                                                    | CCDS46405.1  | chr2_128346090-128346090_G_T  | 605G>V  | Substitution | Nonsynonymous coding | 22% |
| MM04T | MYO9A  | myosin IX A                                                     | CCDS10239.1  | chr15_72192073-72192073_A_C   | 1142I>S | Substitution | Nonsynonymous coding | 33% |
| MM04T | MYO9A  | myosin IX A                                                     | CCDS10239.1  | chr15_72300243-72300243_T_G   | 435K>T  | Substitution | Nonsynonymous coding | 31% |
| MM04T | MYOC   | myocilin, trabecular meshwork inducible glucocorticoid response | CCDS1297.1   | chr1_171605340-171605340_C_T  | 414E>K  | Substitution | Nonsynonymous coding | 31% |
| MM04T | MYOC   | myocilin, trabecular meshwork inducible glucocorticoid response | CCDS1297.1   | chr1_171605841-171605841_C_A  | 247E>X  | Substitution | Nonsense             | 23% |
| MM04T | MYOCD  | myocardin                                                       | CCDS11163.1  | chr17_12655788-12655788_A_G   | 395T>A  | Substitution | Nonsynonymous coding | 30% |
| MM04T | MYOCD  | myocardin                                                       | CCDS11163.1  | chr17_12666670-12666670_C_A   | 842F>L  | Substitution | Nonsynonymous coding | 22% |

|       |         |                                                                                |                 |                               |         |              |                      |     |
|-------|---------|--------------------------------------------------------------------------------|-----------------|-------------------------------|---------|--------------|----------------------|-----|
| MM04T | MYOF    | myoferlin                                                                      | CCDS41551.1     | chr10_95085712-95085712_T_G   | 1714K>N | Substitution | Nonsynonymous coding | 32% |
| MM04T | MYOM1   | myomesin 1                                                                     | CCDS45824.1     | chr18_3134759-3134759_G_A     | 758S>L  | Substitution | Nonsynonymous coding | 35% |
| MM04T | MYOM3   | myomesin 3                                                                     | CCDS41281.1     | chr1_24400669-24400669_G_T    | 983S>R  | Substitution | Nonsynonymous coding | 21% |
| MM04T | MYOZ1   | myozenin 1                                                                     | CCDS7330.1      | chr10_75397517-75397517_G_T   | 79F>L   | Substitution | Nonsynonymous coding | 25% |
| MM04T | MYOZ2   | myozenin 2                                                                     | CCDS3711.1      | chr4_120072138-120072138_G_T  | 63R>I   | Substitution | Nonsynonymous coding | 30% |
| MM04T | MYRFL   | myelin regulatory factor-like                                                  | ENST00000299350 | chr12_70351699-70351699_G_T   | 215E>X  | Substitution | Nonsense             | 36% |
| MM04T | MYSM1   | Myb-like, SWIRM and MPN domains 1                                              | CCDS41343.1     | chr1_59125714-59125714_C_A    | 814E>D  | Substitution | Nonsynonymous coding | 31% |
| MM04T | MYSM1   | Myb-like, SWIRM and MPN domains 1                                              | CCDS41343.1     | chr1_59154736-59154736_C_A    | 125E>X  | Substitution | Nonsense             | 27% |
| MM04T | MYT1    | myelin transcription factor 1                                                  | CCDS13558.1     | chr20_62839732-62839732_G_A   | 395V>I  | Substitution | Nonsynonymous coding | 32% |
| MM04T | MYT1    | myelin transcription factor 1                                                  | CCDS13558.1     | chr20_62839824-62839824_G_T   | 425K>N  | Substitution | Nonsynonymous coding | 15% |
| MM04T | MYT1L   | myelin transcription factor 1-like                                             | CCDS46222.1     | chr2_1893150-1893150_G_A      | 793P>S  | Substitution | Nonsynonymous coding | 21% |
| MM04T | N4BP1   | NEDD4 binding protein 1                                                        | CCDS45479.1     | chr16_48595270-48595270_C_A   | 428K>N  | Substitution | Nonsynonymous coding | 16% |
| MM04T | N4BP2   | NEDD4 binding protein 2                                                        | CCDS3457.1      | chr4_40098977-40098977_A_C    | 6K>T    | Substitution | Nonsynonymous coding | 35% |
| MM04T | N4BP2L1 | NEDD4 binding protein 2-like 1                                                 | CCDS9345.2      | chr13_32981411-32981411_C_A   | 124W>C  | Substitution | Nonsynonymous coding | 23% |
| MM04T | N4BP2L2 | NEDD4 binding protein 2-like 2                                                 | CCDS45024.1     | chr13_33096393-33096393_C_T   | 38D>N   | Substitution | Nonsynonymous coding | 29% |
| MM04T | N6AMT2  | N-6 adenine-specific DNA methyltransferase 2 (putative)                        | CCDS9293.1      | chr13_21306195-21306195_G_A   | 98S>L   | Substitution | Nonsynonymous coding | 28% |
| MM04T | NAA40   | N(alpha)-acetyltransferase 40, NatD catalytic subunit, homolog (S. cerevisiae) | CCDS8053.1      | chr11_63719915-63719915_G_T   | 96E>D   | Substitution | Nonsynonymous coding | 30% |
| MM04T | NAA40   | N(alpha)-acetyltransferase 40, NatD catalytic subunit, homolog (S. cerevisiae) | CCDS8053.1      | chr11_63721500-63721500_A_C   | 184Q>P  | Substitution | Nonsynonymous coding | 27% |
| MM04T | NAGK    | N-acetylglucosamine kinase                                                     | CCDS33220.1     | chr2_71302694-71302694_C_T    | 197R>W  | Substitution | Nonsynonymous coding | 35% |
| MM04T | NALCN   | sodium leak channel, non-selective                                             | CCDS9498.1      | chr13_101753209-101753209_C_T | 1030V>I | Substitution | Nonsynonymous coding | 24% |
| MM04T | NAMPTL  | nicotinamide phosphoribosyltransferase-like                                    | ENST00000440465 | chr10_36812223-36812223_G_A   | 314P>S  | Substitution | Nonsynonymous coding | 20% |
| MM04T | NAP1L2  | nucleosome assembly protein 1-like 2                                           | CCDS14423.1     | chrX_72433253-72433253_C_T    | 359R>Q  | Substitution | Nonsynonymous coding | 23% |
| MM04T | NAP1L2  | nucleosome assembly protein 1-like 2                                           | CCDS14423.1     | chrX_72433810-72433810_C_A    | 173E>D  | Substitution | Nonsynonymous coding | 26% |
| MM04T | NAPA    | N-ethylmaleimide-sensitive factor attachment protein, alpha                    | CCDS12702.1     | chr19_47991634-47991634_C_T   | 267D>N  | Substitution | Nonsynonymous coding | 27% |
| MM04T | NARFL   | nuclear prelamin A recognition factor-like                                     | CCDS10425.1     | chr16_789681-789681_G_A       | 42R>C   | Substitution | Nonsynonymous coding | 24% |
| MM04T | NAT8    | N-acetyltransferase 8 (GCN5-related, putative)                                 | NM_016347       | chr2_73927876-73927876_C_T    | 186G>D  | Substitution | Nonsynonymous coding | 32% |
| MM04T | NAT8    | N-acetyltransferase 8 (GCN5-related, putative)                                 | NM_016347       | chr2_73928311-73928311_C_T    | 41R>Q   | Substitution | Nonsynonymous coding | 32% |
| MM04T | NAV1    | neuron navigator 1                                                             | CCDS1414.1      | chr1_201779200-201779200_C_T  | 1507R>X | Substitution | Nonsense             | 39% |
| MM04T | NAV2    | neuron navigator 2                                                             | CCDS7851.2      | chr11_19955292-19955292_G_T   | 501S>I  | Substitution | Nonsynonymous coding | 25% |
| MM04T | NAV3    | neuron navigator 3                                                             | CCDS41815.1     | chr12_78400684-78400684_C_A   | 456L>I  | Substitution | Nonsynonymous coding | 27% |
| MM04T | NBEA    | neurobeachin                                                                   | CCDS45026.1     | chr13_35751142-35751142_G_A   | 1522E>K | Substitution | Nonsynonymous coding | 39% |
| MM04T | NBEA    | neurobeachin                                                                   | CCDS45026.1     | chr13_35770192-35770192_T_A   | 1707L>M | Substitution | Nonsynonymous coding | 33% |

|       |         |                                                                             |                 |                               |         |              |                      |     |
|-------|---------|-----------------------------------------------------------------------------|-----------------|-------------------------------|---------|--------------|----------------------|-----|
| MM04T | NBEA    | neurobeachin                                                                | CCDS45026.1     | chr13_36223874-36223874_C_T   | 2597S>F | Substitution | Nonsynonymous coding | 24% |
| MM04T | NBEA    | neurobeachin                                                                | CCDS45026.1     | chr13_35751132-35751132_G_T   | NA      | Substitution | Splice site acceptor | 42% |
| MM04T | NBEA    | neurobeachin                                                                | CCDS45026.1     | chr13_36026354-36026354_G_T   | 2144E>X | Substitution | Nonsense             | 34% |
| MM04T | NBEAL1  | neurobeachin-like 1                                                         | CCDS46495.1     | chr2_203922167-203922167_G_T  | 169R>I  | Substitution | Nonsynonymous coding | 30% |
| MM04T | NBEAL1  | neurobeachin-like 1                                                         | CCDS46495.1     | chr2_203972697-203972697_G_A  | 550V>M  | Substitution | Nonsynonymous coding | 32% |
| MM04T | NBEAL1  | neurobeachin-like 1                                                         | CCDS46495.1     | chr2_204045201-204045201_C_A  | 2158F>L | Substitution | Nonsynonymous coding | 25% |
| MM04T | NBEAL1  | neurobeachin-like 1                                                         | CCDS46495.1     | chr2_204045150-204045150_G_A  | 2141W>X | Substitution | Nonsense             | 27% |
| MM04T | NBEAL2  | neurobeachin-like 2                                                         | CCDS46817.1     | chr3_47045750-47045750_C_A    | 2022P>H | Substitution | Nonsynonymous coding | 20% |
| MM04T | NBEAL2  | neurobeachin-like 2                                                         | CCDS46817.1     | chr3_47046576-47046576_G_A    | 2137V>M | Substitution | Nonsynonymous coding | 17% |
| MM04T | NBL1    | neuroblastoma, suppression of tumorigenicity 1                              | CCDS41278.1     | chr1_19981611-19981611_G_A    | 65D>N   | Substitution | Nonsynonymous coding | 33% |
| MM04T | NBL1    | neuroblastoma, suppression of tumorigenicity 1                              | CCDS41278.1     | chr1_19981611-19981611_G_T    | 65D>Y   | Substitution | Nonsynonymous coding | 16% |
| MM04T | NCAM1   | neural cell adhesion molecule 1                                             | ENST00000401611 | chr11_113103048-113103048_A_G | 338Y>C  | Substitution | Nonsynonymous coding | 34% |
| MM04T | NCAM1   | neural cell adhesion molecule 1                                             | ENST00000433634 | chr11_113142516-113142516_C_T | 247R>X  | Substitution | Nonsense             | 24% |
| MM04T | NCAM2   | neural cell adhesion molecule 2                                             | ENST00000284894 | chr21_22644156-22644156_C_A   | 16S>Y   | Substitution | Nonsynonymous coding | 36% |
| MM04T | NCAM2   | neural cell adhesion molecule 2                                             | CCDS42910.1     | chr21_22782769-22782769_G_T   | 457K>N  | Substitution | Nonsynonymous coding | 43% |
| MM04T | NCAM2   | neural cell adhesion molecule 2                                             | CCDS42910.1     | chr21_22849638-22849638_G_T   | 641E>D  | Substitution | Nonsynonymous coding | 20% |
| MM04T | NCAM2   | neural cell adhesion molecule 2                                             | CCDS42910.1     | chr21_22849760-22849760_T_G   | 682F>C  | Substitution | Nonsynonymous coding | 41% |
| MM04T | NCAM2   | neural cell adhesion molecule 2                                             | CCDS42910.1     | chr21_22707880-22707880_G_T   | 265E>X  | Substitution | Nonsense             | 32% |
| MM04T | NCAN    | neurocan                                                                    | CCDS12397.1     | chr19_19360589-19360589_C_T   | 1279R>W | Substitution | Nonsynonymous coding | 18% |
| MM04T | NCAPD2  | non-SMC condensin I complex, subunit D2                                     | CCDS8548.1      | chr12_6632090-6632090_C_A     | 684S>Y  | Substitution | Nonsynonymous coding | 27% |
| MM04T | NCAPH   | non-SMC condensin I complex, subunit H                                      | CCDS2021.1      | chr2_97025928-97025928_G_T    | 469D>Y  | Substitution | Nonsynonymous coding | 42% |
| MM04T | NCDN    | neurochondrin                                                               | CCDS392.1       | chr1_36028038-36028038_C_T    | 397R>W  | Substitution | Nonsynonymous coding | 28% |
| MM04T | NCKAP5  | NCK-associated protein 5                                                    | CCDS46418.1     | chr2_133538711-133538711_G_T  | 1655L>I | Substitution | Nonsynonymous coding | 21% |
| MM04T | NCOA1   | nuclear receptor coactivator 1                                              | CCDS1712.1      | chr2_24929877-24929877_C_T    | 513S>L  | Substitution | Nonsynonymous coding | 33% |
| MM04T | NCOA2   | nuclear receptor coactivator 2                                              | CCDS47872.1     | chr8_71044086-71044086_C_T    | 1104E>K | Substitution | Nonsynonymous coding | 40% |
| MM04T | NCOA5   | nuclear receptor coactivator 5                                              | CCDS13392.1     | chr20_44691286-44691286_A_C   | 465F>V  | Substitution | Nonsynonymous coding | 24% |
| MM04T | NCOA7   | nuclear receptor coactivator 7                                              | CCDS5132.1      | chr6_126210307-126210307_G_T  | 369E>D  | Substitution | Nonsynonymous coding | 27% |
| MM04T | NCOR1   | nuclear receptor corepressor 1                                              | CCDS11175.1     | chr17_15965510-15965510_T_C   | 1766T>A | Substitution | Nonsynonymous coding | 26% |
| MM04T | NCOR1   | nuclear receptor corepressor 1                                              | CCDS11175.1     | chr17_16052775-16052775_C_A   | 300R>I  | Substitution | Nonsynonymous coding | 16% |
| MM04T | NCOR1   | nuclear receptor corepressor 1                                              | CCDS11175.1     | chr17_16056708-16056708_T_G   | 245K>T  | Substitution | Nonsynonymous coding | 13% |
| MM04T | NCR1    | natural cytotoxicity triggering receptor 1<br>[Source:HGNC Symbol;Acc:6731] | CCDS12911.1     | chr19_55424096-55424096_C_T   | 258R>W  | Substitution | Nonsynonymous coding | 22% |
| MM04T | NCR3LG1 | natural killer cell cytotoxicity receptor 3 ligand 1                        | ENST00000338965 | chr11_17393815-17393815_G_A   | 374R>Q  | Substitution | Nonsynonymous coding | 36% |

|       |         |                                                                        |                |                              |         |              |                      |     |
|-------|---------|------------------------------------------------------------------------|----------------|------------------------------|---------|--------------|----------------------|-----|
| MM04T | NDNF    | neuron-derived neurotrophic factor                                     | CCDS3717.2     | chr4_121958456-121958456_G_T | 224L>I  | Substitution | Nonsynonymous coding | 21% |
| MM04T | NDRG3   | NDRG family member 3                                                   | CCDS13285.1    | chr20_35315993-35315993_G_T  | 74F>L   | Substitution | Nonsynonymous coding | 29% |
| MM04T | NDST1   | N-deacetylase/N-sulfotransferase (heparan glucosaminyl) 1              | CCDS34277.1    | chr5_149927883-149927883_G_A | 750R>H  | Substitution | Nonsynonymous coding | 23% |
| MM04T | NDST3   | N-deacetylase/N-sulfotransferase (heparan glucosaminyl) 3              | CCDS3708.1     | chr4_119174662-119174662_C_A | 803S>Y  | Substitution | Nonsynonymous coding | 31% |
| MM04T | NDST4   | N-deacetylase/N-sulfotransferase (heparan glucosaminyl) 4              | CCDS3706.1     | chr4_115998171-115998171_G_A | 8R>W    | Substitution | Nonsynonymous coding | 34% |
| MM04T | NDUFA9  | NADH dehydrogenase (ubiquinone) 1 alpha subcomplex, 9, 39kDa           | CCDS8532.1     | chr12_4763595-4763595_G_T    | 63G>X   | Substitution | Nonsense             | 20% |
| MM04T | NDUFB11 | NADH dehydrogenase (ubiquinone) 1 beta subcomplex, 11, 17.3kDa         | CCDS14273.1    | chrX_47002088-47002088_C_T   | 88R>Q   | Substitution | Nonsynonymous coding | 49% |
| MM04T | NDUF5   | NADH dehydrogenase (ubiquinone) 1 beta subcomplex, 5, 16kDa            | CCDS3234.1     | chr3_179334788-179334788_G_T | 100E>X  | Substitution | Nonsense             | 27% |
| MM04T | NDUFS1  | NADH dehydrogenase (ubiquinone) Fe-S protein 1, 75kDa (NADH-coenzyme Q | CCDS2366.1     | chr2_206997826-206997826_G_T | 466L>I  | Substitution | Nonsynonymous coding | 21% |
| MM04T | NDUFS1  | NADH dehydrogenase (ubiquinone) Fe-S protein 1, 75kDa (NADH-coenzyme Q | CCDS2366.1     | chr2_206991490-206991490_G_A | 655R>X  | Substitution | Nonsense             | 39% |
| MM04T | NDUFS2  | NADH dehydrogenase (ubiquinone) Fe-S protein 2, 49kDa (NADH-coenzyme Q | CCDS1224.1     | chr1_161179344-161179344_G_A | 196A>T  | Substitution | Nonsynonymous coding | 34% |
| MM04T | NEB     | nebulin                                                                | CCDS46424.1    | chr2_152373001-152373001_G_A | 5925A>V | Substitution | Nonsynonymous coding | 27% |
| MM04T | NEB     | nebulin                                                                | CCDS46424.1    | chr2_152380907-152380907_C_T | 5765R>H | Substitution | Nonsynonymous coding | 32% |
| MM04T | NEB     | nebulin                                                                | CCDS46424.1    | chr2_152392251-152392251_G_T | 5388S>Y | Substitution | Nonsynonymous coding | 24% |
| MM04T | NEB     | nebulin                                                                | CCDS46424.1    | chr2_152534219-152534219_C_T | 1212D>N | Substitution | Nonsynonymous coding | 30% |
| MM04T | NEB     | nebulin                                                                | CCDS46424.1    | chr2_152553658-152553658_T_G | NA      | Substitution | Splice site donor    | 29% |
| MM04T | NEBL    | nebulette                                                              | CCDS7134.1     | chr10_21120156-21120156_C_T  | 547R>Q  | Substitution | Nonsynonymous coding | 25% |
| MM04T | NEFH    | neurofilament, heavy polypeptide                                       | CCDS13858.1    | chr22_29876807-29876807_G_T  | 186D>Y  | Substitution | Nonsynonymous coding | 28% |
| MM04T | NEFL    | neurofilament, light polypeptide                                       | ENST0000221169 | chr8_24811806-24811806_T_C   | 353K>R  | Substitution | Nonsynonymous coding | 38% |
| MM04T | NEFL    | neurofilament, light polypeptide                                       | ENST0000221169 | chr8_24813333-24813333_C_T   | 233E>K  | Substitution | Nonsynonymous coding | 36% |
| MM04T | NEK10   | NIMA-related kinase 10                                                 | CCDS46781.1    | chr3_27333024-27333024_C_T   | 476R>H  | Substitution | Nonsynonymous coding | 29% |
| MM04T | NEK10   | NIMA-related kinase 10                                                 | CCDS46781.1    | chr3_27393996-27393996_C_A   | 31R>I   | Substitution | Nonsynonymous coding | 24% |
| MM04T | NEK5    | NIMA-related kinase 5                                                  | CCDS31979.1    | chr13_52639709-52639709_C_T  | 654R>K  | Substitution | Nonsynonymous coding | 23% |
| MM04T | NEK5    | NIMA-related kinase 5                                                  | CCDS31979.1    | chr13_52682523-52682523_C_T  | 162R>Q  | Substitution | Nonsynonymous coding | 26% |
| MM04T | NEK5    | NIMA-related kinase 5                                                  | CCDS31979.1    | chr13_52686454-52686454_G_T  | 88L>I   | Substitution | Nonsynonymous coding | 18% |
| MM04T | NELL1   | NEL-like 1 (chicken)                                                   | CCDS7855.1     | chr11_21135237-21135237_G_A  | 468R>H  | Substitution | Nonsynonymous coding | 25% |
| MM04T | NELL1   | NEL-like 1 (chicken)                                                   | CCDS7855.1     | chr11_21594834-21594834_G_A  | 754C>Y  | Substitution | Nonsynonymous coding | 34% |
| MM04T | NELL1   | NEL-like 1 (chicken)                                                   | CCDS7855.1     | chr11_21594864-21594864_G_T  | 764R>I  | Substitution | Nonsynonymous coding | 22% |
| MM04T | NELL2   | NEL-like 2 (chicken)                                                   | CCDS44863.1    | chr12_44917145-44917145_C_A  | 693D>Y  | Substitution | Nonsynonymous coding | 39% |
| MM04T | NELL2   | NEL-like 2 (chicken)                                                   | CCDS44863.1    | chr12_45108447-45108447_G_T  | 408L>I  | Substitution | Nonsynonymous coding | 30% |
| MM04T | NEO1    | neogenin 1                                                             | CCDS10247.1    | chr15_73590697-73590697_C_T  | 1304R>X | Substitution | Nonsense             | 29% |
| MM04T | NES     | nestin                                                                 | CCDS1151.1     | chr1_156641223-156641223_C_A | 919E>D  | Substitution | Nonsynonymous coding | 35% |

|       |        |                                                                                 |              |                               |         |              |                      |     |
|-------|--------|---------------------------------------------------------------------------------|--------------|-------------------------------|---------|--------------|----------------------|-----|
| MM04T | NES    | nestin                                                                          | CCDS1151.1   | chr1_156641450-156641450_C_A  | 844E>X  | Substitution | Nonsense             | 21% |
| MM04T | NES    | nestin                                                                          | CCDS1151.1   | chr1_156641546-156641546_C_A  | 812E>X  | Substitution | Nonsense             | 23% |
| MM04T | NETO1  | neuroligin (NRP) and tolloid (TLL)-like 1                                       | CCDS12000.1  | chr18_70417352-70417352_C_T   | 496E>K  | Substitution | Nonsynonymous coding | 40% |
| MM04T | NEU3   | sialidase 3 (membrane sialidase)                                                | CCDS44682.1  | chr11_74716917-74716917_A_G   | 256T>A  | Substitution | Nonsynonymous coding | 30% |
| MM04T | NEU4   | sialidase 4                                                                     | CCDS2553.1   | chr2_242757862-242757862_G_A  | 327E>K  | Substitution | Nonsynonymous coding | 10% |
| MM04T | NEXN   | nexilin (F actin binding protein)                                               | CCDS41351.1  | chr1_78392170-78392170_G_T    | 187K>N  | Substitution | Nonsynonymous coding | 33% |
| MM04T | NEXN   | nexilin (F actin binding protein)                                               | CCDS41351.1  | chr1_78407840-78407840_A_C    | 536K>Q  | Substitution | Nonsynonymous coding | 25% |
| MM04T | NEXN   | nexilin (F actin binding protein)                                               | CCDS41351.1  | chr1_78392300-78392300_A_C    | NA      | Substitution | Splice site donor    | 34% |
| MM04T | NEXN   | nexilin (F actin binding protein)                                               | CCDS41351.1  | chr1_78399012-78399012_G_T    | 367E>X  | Substitution | Nonsense             | 15% |
| MM04T | NF1    | neurofibromin 1                                                                 | CCDS42292.1  | chr17_29677227-29677227_C_T   | 2450R>X | Substitution | Nonsense             | 28% |
| MM04T | NFASC  | neurofascin                                                                     | NM_001005388 | chr1_204971834-204971834_G_A  | 1083E>K | Substitution | Nonsynonymous coding | 29% |
| MM04T | NFAT5  | nuclear factor of activated T-cells 5, tonicity-responsive                      | CCDS45518.1  | chr16_69726291-69726291_A_T   | 855I>F  | Substitution | Nonsynonymous coding | 35% |
| MM04T | NFAT5  | nuclear factor of activated T-cells 5, tonicity-responsive                      | CCDS45518.1  | chr16_69660356-69660356_G_T   | 60E>X   | Substitution | Nonsense             | 32% |
| MM04T | NFATC1 | nuclear factor of activated T-cells, cytoplasmic, calcineurin-dependent 1       | CCDS32850.1  | chr18_77208926-77208926_C_A   | 498L>I  | Substitution | Nonsynonymous coding | 28% |
| MM04T | NFATC1 | nuclear factor of activated T-cells, cytoplasmic, calcineurin-dependent 1       | CCDS32850.1  | chr18_77246463-77246463_G_A   | 757D>N  | Substitution | Nonsynonymous coding | 21% |
| MM04T | NFATC3 | nuclear factor of activated T-cells, cytoplasmic, calcineurin-dependent 3       | CCDS10860.1  | chr16_68200824-68200824_G_T   | 560K>N  | Substitution | Nonsynonymous coding | 38% |
| MM04T | NFIA   | nuclear factor I/A                                                              | CCDS44156.1  | chr1_61554118-61554118_G_T    | 109D>Y  | Substitution | Nonsynonymous coding | 25% |
| MM04T | NFIB   | nuclear factor I/B                                                              | CCDS6474.1   | chr9_14307303-14307303_C_A    | 83D>Y   | Substitution | Nonsynonymous coding | 25% |
| MM04T | NFKB1  | nuclear factor of kappa light polypeptide gene enhancer in B-cells 1            | CCDS3657.1   | chr4_103534603-103534603_G_T  | 872E>X  | Substitution | Nonsense             | 27% |
| MM04T | NFKB2  | nuclear factor of kappa light polypeptide gene enhancer in B-cells 2 (p49/p100) | CCDS41564.1  | chr10_104158227-104158227_G_A | 313R>Q  | Substitution | Nonsynonymous coding | 21% |
| MM04T | NFKB2  | nuclear factor of kappa light polypeptide gene enhancer in B-cells 2 (p49/p100) | CCDS41564.1  | chr10_104161804-104161804_G_A | NA      | Substitution | Splice site acceptor | 27% |
| MM04T | NFRKB  | nuclear factor related to kappaB binding protein                                | CCDS8483.1   | chr11_129744712-129744712_G_A | 677R>C  | Substitution | Nonsynonymous coding | 42% |
| MM04T | NFYB   | nuclear transcription factor Y, beta                                            | CCDS9098.1   | chr12_104517171-104517171_C_A | 88E>X   | Substitution | Nonsense             | 47% |
| MM04T | NHLRC1 | NHL repeat containing 1                                                         | CCDS4542.1   | chr6_18122084-18122084_G_A    | 252R>W  | Substitution | Nonsynonymous coding | 24% |
| MM04T | NHLRC2 | NHL repeat containing 2                                                         | CCDS7585.1   | chr10_115636505-115636505_A_C | 186K>T  | Substitution | Nonsynonymous coding | 37% |
| MM04T | NHS    | Nance-Horan syndrome (congenital cataracts and dental anomalies)                | CCDS14181.1  | chrX_17750121-17750121_G_A    | 1477R>K | Substitution | Nonsynonymous coding | 17% |
| MM04T | NHSL2  | NHS-like 2                                                                      | CCDS35328.1  | chrX_71360222-71360222_A_G    | 576T>A  | Substitution | Nonsynonymous coding | 26% |
| MM04T | NID1   | nidogen 1                                                                       | CCDS1608.1   | chr1_236201550-236201550_A_G  | 380F>S  | Substitution | Nonsynonymous coding | 28% |
| MM04T | NIN    | ninein (GSK3B interacting protein)                                              | CCDS41952.1  | chr14_51239725-51239725_G_A   | 252S>F  | Substitution | Nonsynonymous coding | 39% |
| MM04T | NKAPL  | NFKB activating protein-like                                                    | CCDS34353.1  | chr6_28227812-28227812_G_T    | 221K>N  | Substitution | Nonsynonymous coding | 29% |
| MM04T | NKPD1  | NTPase, KAP family P-loop domain containing 1                                   | CCDS42577.1  | chr19_45655876-45655876_C_T   | 385E>K  | Substitution | Nonsynonymous coding | 40% |
| MM04T | NKPD1  | NTPase, KAP family P-loop domain containing 1                                   | CCDS42577.1  | chr19_45656133-45656133_C_T   | 299R>H  | Substitution | Nonsynonymous coding | 35% |



|       |              |                                        |                 |                               |         |              |                      |     |
|-------|--------------|----------------------------------------|-----------------|-------------------------------|---------|--------------|----------------------|-----|
| MM04T | NKRF         | NFKB repressing factor                 | CCDS35375.1     | chrX_118724901-118724901_G_A  | 163P>S  | Substitution | Nonsynonymous coding | 15% |
| MM04T | NKRF         | NFKB repressing factor                 | CCDS35375.1     | chrX_118726451-118726451_T_G  | 4I>L    | Substitution | Nonsynonymous coding | 20% |
| MM04T | NKX2-5       | NK2 homeobox 5                         | CCDS4387.1      | chr5_172659609-172659609_G_A  | 313S>L  | Substitution | Nonsynonymous coding | 32% |
| MM04T | NLE1         | notchless homolog 1 (Drosophila)       | CCDS11291.1     | chr17_33462389-33462389_G_T   | 365L>I  | Substitution | Nonsynonymous coding | 19% |
| MM04T | NLGN1        | neuroligin 1                           | CCDS3222.1      | chr3_173998399-173998399_G_T  | 593R>I  | Substitution | Nonsynonymous coding | 31% |
| MM04T | NLGN2        | neuroligin 2                           | CCDS11103.1     | chr17_7320493-7320493_G_A     | 628R>H  | Substitution | Nonsynonymous coding | 29% |
| MM04T | NLGN3        | neuroligin 3                           | CCDS14407.1     | chrX_70384026-70384026_G_A    | 234G>D  | Substitution | Nonsynonymous coding | 33% |
| MM04T | NLGN4X       | neuroligin 4, X-linked                 | CCDS14126.1     | chrX_6069100-6069100_C_A      | 136M>I  | Substitution | Nonsynonymous coding | 28% |
| MM04T | NLRC3        | NLR family, CARD domain containing 3   | ENST00000448023 | chr16_3591858-3591858_C_A     | 1101K>N | Substitution | Nonsynonymous coding | 19% |
| MM04T | NLRC3        | NLR family, CARD domain containing 3   | ENST00000448023 | chr16_3611719-3611719_G_A     | 714R>C  | Substitution | Nonsynonymous coding | 19% |
| MM04T | NLRC4        | NLR family, CARD domain containing 4   | CCDS33174.1     | chr2_32460499-32460499_C_T    | 918R>K  | Substitution | Nonsynonymous coding | 30% |
| MM04T | NLRC4        | NLR family, CARD domain containing 4   | CCDS33174.1     | chr2_32476391-32476391_C_T    | 181R>Q  | Substitution | Nonsynonymous coding | 31% |
| MM04T | NLRC4        | NLR family, CARD domain containing 4   | CCDS33174.1     | chr2_32463252-32463252_C_A    | 824E>X  | Substitution | Nonsense             | 30% |
| MM04T | NLRP1        | NLR family, pyrin domain containing 1  | CCDS42246.1     | chr17_5418184-5418184_G_A     | 1438R>W | Substitution | Nonsynonymous coding | 33% |
| MM04T | NLRP10       | NLR family, pyrin domain containing 10 | CCDS7784.1      | chr11_7981362-7981362_C_A     | 599Q>H  | Substitution | Nonsynonymous coding | 28% |
| MM04T | NLRP12       | NLR family, pyrin domain containing 12 | CCDS12864.1     | chr19_54314024-54314024_C_T   | 297D>N  | Substitution | Nonsynonymous coding | 34% |
| MM04T | NLRP14       | NLR family, pyrin domain containing 14 | CCDS7776.1      | chr11_7065038-7065038_T_G     | 594F>C  | Substitution | Nonsynonymous coding | 39% |
| MM04T | NLRP14       | NLR family, pyrin domain containing 14 | CCDS7776.1      | chr11_7070949-7070949_C_A     | 724S>Y  | Substitution | Nonsynonymous coding | 19% |
| MM04T | NLRP4        | NLR family, pyrin domain containing 4  | CCDS12936.1     | chr19_56363463-56363463_T_G   | 6F>C    | Substitution | Nonsynonymous coding | 31% |
| MM04T | NLRP4        | NLR family, pyrin domain containing 4  | CCDS12936.1     | chr19_56369103-56369103_C_T   | 115S>F  | Substitution | Nonsynonymous coding | 24% |
| MM04T | NLRP4        | NLR family, pyrin domain containing 4  | CCDS12936.1     | chr19_56379115-56379115_C_A   | 743L>I  | Substitution | Nonsynonymous coding | 22% |
| MM04T | NLRP5        | NLR family, pyrin domain containing 5  | CCDS12938.1     | chr19_56539737-56539737_C_T   | 713P>L  | Substitution | Nonsynonymous coding | 21% |
| MM04T | NLRP9        | NLR family, pyrin domain containing 9  | CCDS12934.1     | chr19_56244577-56244577_G_A   | 207P>L  | Substitution | Nonsynonymous coding | 21% |
| MM04T | NLRP9        | NLR family, pyrin domain containing 9  | CCDS12934.1     | chr19_56249632-56249632_A_C   | 37F>V   | Substitution | Nonsynonymous coding | 29% |
| MM04T | NLRX1        | NLR family member X1                   | CCDS8416.1      | chr11_119054038-119054038_C_A | 940L>M  | Substitution | Nonsynonymous coding | 21% |
| MM04T | NM_001037228 | -                                      | NM_001037228    | chr2_96906138-96906138_G_A    | 26R>Q   | Substitution | Nonsynonymous coding | 30% |
| MM04T | NM_001037228 | -                                      | NM_001037228    | chr2_96906231-96906231_C_A    | 57S>Y   | Substitution | Nonsynonymous coding | 24% |
| MM04T | NMB          | neuromedin B                           | CCDS42076.1     | chr15_85198619-85198619_T_G   | 116N>T  | Substitution | Nonsynonymous coding | 40% |
| MM04T | NME8         | NME/NM23 family member 8               | CCDS5452.1      | chr7_37936660-37936660_T_C    | 578V>A  | Substitution | Nonsynonymous coding | 28% |
| MM04T | NME9         | NME/NM23 family member 9               | CCDS3099.1      | chr3_138022463-138022463_C_A  | 211E>X  | Substitution | Nonsense             | 22% |
| MM04T | NMT2         | N-myristoyltransferase 2               | CCDS7109.1      | chr10_15154910-15154910_G_A   | 408T>M  | Substitution | Nonsynonymous coding | 24% |
| MM04T | NMT2         | N-myristoyltransferase 2               | CCDS7109.1      | chr10_15170410-15170410_A_C   | 313F>C  | Substitution | Nonsynonymous coding | 23% |

|       |         |                                                        |              |                               |         |              |                      |     |
|-------|---------|--------------------------------------------------------|--------------|-------------------------------|---------|--------------|----------------------|-----|
| MM04T | NNT     | nicotinamide nucleotide transhydrogenase               | CCDS3949.1   | chr5_43655941-43655941_G_T    | NA      | Substitution | Splice site acceptor | 23% |
| MM04T | NOA1    | nitric oxide associated 1                              | CCDS3510.1   | chr4_57829786-57829786_G_T    | 643L>I  | Substitution | Nonsynonymous coding | 18% |
| MM04T | NOBOX   | NOBOX oogenesis homeobox                               | NM_001080413 | chr7_144095402-144095402_G_T  | 466L>M  | Substitution | Nonsynonymous coding | 19% |
| MM04T | NOBOX   | NOBOX oogenesis homeobox                               | NM_001080413 | chr7_144095513-144095513_G_A  | 429P>S  | Substitution | Nonsynonymous coding | 18% |
| MM04T | NOC3L   | nucleolar complex associated 3 homolog (S. cerevisiae) | CCDS7433.1   | chr10_96112709-96112709_C_A   | 268D>Y  | Substitution | Nonsynonymous coding | 24% |
| MM04T | NOL7    | nucleolar protein 7, 27kDa                             | CCDS4528.1   | chr6_13615949-13615949_A_C    | 91K>T   | Substitution | Nonsynonymous coding | 33% |
| MM04T | NOM1    | nucleolar protein with MIF4G domain 1                  | CCDS34787.1  | chr7_156756692-156756692_T_G  | 669F>V  | Substitution | Nonsynonymous coding | 39% |
| MM04T | NOP56   | NOP56 ribonucleoprotein                                | CCDS13030.1  | chr20_2637727-2637727_G_A     | 428A>T  | Substitution | Nonsynonymous coding | 24% |
| MM04T | NOS2    | nitric oxide synthase 2, inducible                     | CCDS11223.1  | chr17_26096177-26096177_C_A   | 620R>S  | Substitution | Nonsynonymous coding | 30% |
| MM04T | NOS2    | nitric oxide synthase 2, inducible                     | CCDS11223.1  | chr17_26105938-26105938_G_T   | 383F>L  | Substitution | Nonsynonymous coding | 21% |
| MM04T | NOS3    | nitric oxide synthase 3 (endothelial cell)             | CCDS5912.1   | chr7_150709464-150709464_G_A  | 1004D>N | Substitution | Nonsynonymous coding | 37% |
| MM04T | NOSTRIN | nitric oxide synthase trafficker                       | CCDS42771.1  | chr2_169699615-169699615_G_T  | 206E>D  | Substitution | Nonsynonymous coding | 18% |
| MM04T | NOSTRIN | nitric oxide synthase trafficker                       | CCDS42771.1  | chr2_169717361-169717361_G_T  | 412E>D  | Substitution | Nonsynonymous coding | 19% |
| MM04T | NOTCH2  | notch 2                                                | CCDS908.1    | chr1_120458509-120458509_T_C  | 2279H>R | Substitution | Nonsynonymous coding | 29% |
| MM04T | NOTCH2  | notch 2                                                | CCDS908.1    | chr1_120458746-120458746_G_T  | 2200S>Y | Substitution | Nonsynonymous coding | 30% |
| MM04T | NOTCH2  | notch 2                                                | CCDS908.1    | chr1_120461166-120461166_C_T  | 1931R>H | Substitution | Nonsynonymous coding | 32% |
| MM04T | NOTCH2  | notch 2                                                | CCDS908.1    | chr1_120479946-120479946_C_T  | 1161G>R | Substitution | Nonsynonymous coding | 30% |
| MM04T | NOTO    | notochord homeobox                                     | CCDS46335.1  | chr2_73430015-73430015_T_C    | 74V>A   | Substitution | Nonsynonymous coding | 37% |
| MM04T | NOTUM   | notum pectinacetyltransferase homolog (Drosophila)     | CCDS32771.2  | chr17_79915727-79915727_C_T   | 217G>D  | Substitution | Nonsynonymous coding | 24% |
| MM04T | NOX1    | NADPH oxidase 1                                        | CCDS14474.1  | chrX_100129086-100129086_G_T  | 15L>M   | Substitution | Nonsynonymous coding | 27% |
| MM04T | NOX4    | NADPH oxidase 4                                        | CCDS8285.1   | chr11_89135534-89135534_A_T   | 269I>N  | Substitution | Nonsynonymous coding | 36% |
| MM04T | NOXO1   | NADPH oxidase organizer 1                              | CCDS42101.1  | chr16_2030686-2030686_C_A     | 65R>I   | Substitution | Nonsynonymous coding | 35% |
| MM04T | NPAP1   | nuclear pore associated protein 1                      | CCDS10015.1  | chr15_24923194-24923194_T_G   | 727L>R  | Substitution | Nonsynonymous coding | 19% |
| MM04T | NPAS3   | neuronal PAS domain protein 3                          | CCDS9645.1   | chr14_34243634-34243634_C_T   | 283A>V  | Substitution | Nonsynonymous coding | 27% |
| MM04T | NPAS4   | neuronal PAS domain protein 4                          | CCDS8138.1   | chr11_66191619-66191619_C_A   | 420L>I  | Substitution | Nonsynonymous coding | 29% |
| MM04T | NPAT    | nuclear protein, ataxia-telangiectasia locus           | CCDS41710.1  | chr11_108043828-108043828_G_A | 628S>L  | Substitution | Nonsynonymous coding | 27% |
| MM04T | NPAT    | nuclear protein, ataxia-telangiectasia locus           | CCDS41710.1  | chr11_108044135-108044135_G_T | 526L>I  | Substitution | Nonsynonymous coding | 37% |
| MM04T | NPAT    | nuclear protein, ataxia-telangiectasia locus           | CCDS41710.1  | chr11_108043970-108043970_C_A | 581E>X  | Substitution | Nonsense             | 53% |
| MM04T | NPC1    | Niemann-Pick disease, type C1                          | CCDS11878.1  | chr18_21121069-21121069_G_T   | 826S>Y  | Substitution | Nonsynonymous coding | 28% |
| MM04T | NPEPL1  | aminopeptidase-like 1                                  | CCDS46621.1  | chr20_57287576-57287576_G_T   | 314E>D  | Substitution | Nonsynonymous coding | 21% |
| MM04T | NPHP3   | nephronophthisis 3 (adolescent)                        | CCDS3078.1   | chr3_132424596-132424596_C_A  | 446K>N  | Substitution | Nonsynonymous coding | 22% |
| MM04T | NPHP3   | nephronophthisis 3 (adolescent)                        | CCDS3078.1   | chr3_132402320-132402320_G_A  | 1207R>X | Substitution | Nonsense             | 27% |

|       |       |                                                                                          |                 |                               |         |              |                      |     |
|-------|-------|------------------------------------------------------------------------------------------|-----------------|-------------------------------|---------|--------------|----------------------|-----|
| MM04T | NPHS2 | nephrosis 2, idiopathic, steroid-resistant (podocin)                                     | CCDS1331.1      | chr1_179520321-179520321_G_T  | 380S>Y  | Substitution | Nonsynonymous coding | 24% |
| MM04T | NPL   | N-acetylneuraminate pyruvate lyase (dihydrodipicolinate synthase)                        | CCDS1350.1      | chr1_182798000-182798000_C_A  | 307S>Y  | Substitution | Nonsynonymous coding | 31% |
| MM04T | NPR1  | natriuretic peptide receptor A/guanylate cyclase A (atrionatriuretic peptide receptor A) | CCDS1051.1      | chr1_153661467-153661467_G_A  | 819R>H  | Substitution | Nonsynonymous coding | 31% |
| MM04T | NPSR1 | neuropeptide S receptor 1                                                                | CCDS5443.1      | chr7_34698098-34698098_C_A    | 25A>D   | Substitution | Nonsynonymous coding | 25% |
| MM04T | NPSR1 | neuropeptide S receptor 1                                                                | CCDS5443.1      | chr7_34867065-34867065_C_A    | 177F>L  | Substitution | Nonsynonymous coding | 29% |
| MM04T | NPTN  | neuroligin 1                                                                             | CCDS10249.1     | chr15_73862668-73862668_C_T   | 313E>K  | Substitution | Nonsynonymous coding | 25% |
| MM04T | NPTX1 | neuronal pentraxin I                                                                     | CCDS32762.1     | chr17_78447131-78447131_A_C   | 256C>G  | Substitution | Nonsynonymous coding | 22% |
| MM04T | NPY1R | neuropeptide Y receptor Y1                                                               | CCDS34089.1     | chr4_164246862-164246862_C_A  | 250D>Y  | Substitution | Nonsynonymous coding | 33% |
| MM04T | NPY5R | neuropeptide Y receptor Y5                                                               | CCDS3804.1      | chr4_164272343-164272343_G_T  | 306E>D  | Substitution | Nonsynonymous coding | 27% |
| MM04T | NR0B2 | nuclear receptor subfamily 0, group B, member 2                                          | CCDS291.1       | chr1_27239964-27239964_G_T    | 156F>L  | Substitution | Nonsynonymous coding | 22% |
| MM04T | NR1H4 | nuclear receptor subfamily 1, group H, member 4                                          | CCDS9078.1      | chr12_100904888-100904888_C_A | 138H>N  | Substitution | Nonsynonymous coding | 19% |
| MM04T | NR1H4 | nuclear receptor subfamily 1, group H, member 4                                          | CCDS9078.1      | chr12_100930735-100930735_G_T | 277E>X  | Substitution | Nonsense             | 15% |
| MM04T | NR1I3 | nuclear receptor subfamily 1, group I, member 3                                          | CCDS41429.1     | chr1_161205738-161205738_G_A  | 46T>I   | Substitution | Nonsynonymous coding | 34% |
| MM04T | NR2C1 | nuclear receptor subfamily 2, group C, member 1                                          | CCDS9051.1      | chr12_95456378-95456378_G_A   | 64S>F   | Substitution | Nonsynonymous coding | 30% |
| MM04T | NR2E1 | nuclear receptor subfamily 2, group E, member 1                                          | CCDS5063.1      | chr6_108508587-108508587_G_T  | 360E>X  | Substitution | Nonsense             | 38% |
| MM04T | NR4A2 | nuclear receptor subfamily 4, group A, member 2                                          | CCDS2201.1      | chr2_157182372-157182372_C_A  | 561E>X  | Substitution | Nonsense             | 32% |
| MM04T | NRCAM | neuronal cell adhesion molecule                                                          | CCDS47686.1     | chr7_107834834-107834834_A_G  | 501I>T  | Substitution | Nonsynonymous coding | 13% |
| MM04T | NRD1  | neuraminidase 1 (N-arginine diase)                                                       | CCDS5559.1      | chr1_52272559-52272559_C_T    | 741D>N  | Substitution | Nonsynonymous coding | 28% |
| MM04T | NRG1  | neuregulin 1                                                                             | CCDS6083.1      | chr8_32607084-32607084_C_T    | 233L>F  | Substitution | Nonsynonymous coding | 23% |
| MM04T | NRG3  | neuregulin 3                                                                             | CCDS31233.1     | chr10_83635427-83635427_G_T   | 111D>Y  | Substitution | Nonsynonymous coding | 30% |
| MM04T | NRIP2 | nuclear receptor interacting protein 2                                                   | CCDS8514.1      | chr12_2944031-2944031_C_A     | 40S>I   | Substitution | Nonsynonymous coding | 20% |
| MM04T | NRK   | Nik related kinase                                                                       | NM_198465       | chrX_105142622-105142622_G_T  | 209R>M  | Substitution | Nonsynonymous coding | 23% |
| MM04T | NRK   | Nik related kinase                                                                       | NM_198465       | chrX_105161586-105161586_C_A  | 812L>I  | Substitution | Nonsynonymous coding | 24% |
| MM04T | NRK   | Nik related kinase                                                                       | NM_198465       | chrX_105168859-105168859_A_C  | 1050I>L | Substitution | Nonsynonymous coding | 36% |
| MM04T | NRK   | Nik related kinase                                                                       | NM_198465       | chrX_105193708-105193708_G_T  | 1499D>Y | Substitution | Nonsynonymous coding | 26% |
| MM04T | NRK   | Nik related kinase                                                                       | NM_198465       | chrX_105152231-105152231_G_T  | NA      | Substitution | Splice site acceptor | 24% |
| MM04T | NRXN1 | neurexin 1                                                                               | CCDS46282.1     | chr2_50758472-50758472_C_T    | 787R>Q  | Substitution | Nonsynonymous coding | 34% |
| MM04T | NRXN3 | neurexin 3                                                                               | ENST00000330071 | chr14_79454510-79454510_G_T   | 857W>C  | Substitution | Nonsynonymous coding | 20% |
| MM04T | NRXN3 | neurexin 3                                                                               | CCDS9870.1      | chr14_80130277-80130277_G_T   | 828E>X  | Substitution | Nonsense             | 27% |
| MM04T | NSD1  | nuclear receptor binding SET domain protein 1                                            | CCDS4412.1      | chr5_176637437-176637437_G_T  | 679Q>H  | Substitution | Nonsynonymous coding | 29% |
| MM04T | NSD1  | nuclear receptor binding SET domain protein 1                                            | CCDS4412.1      | chr5_176631273-176631273_G_T  | 406E>X  | Substitution | Nonsense             | 17% |
| MM04T | NSD1  | nuclear receptor binding SET domain protein 1                                            | CCDS4412.1      | chr5_176700702-176700702_G_T  | 1847E>X | Substitution | Nonsense             | 19% |

|       |         |                                                                             |                 |                               |        |              |                      |     |
|-------|---------|-----------------------------------------------------------------------------|-----------------|-------------------------------|--------|--------------|----------------------|-----|
| MM04T | NSUN6   | NOP2/Sun domain family, member 6                                            | CCDS7130.1      | chr10_18834992-18834992_G_A   | 427S>L | Substitution | Nonsynonymous coding | 23% |
| MM04T | NT5C1A  | 5'-nucleotidase, cytosolic IA                                               | CCDS440.1       | chr1_40125038-40125038_A_G    | 288S>P | Substitution | Nonsynonymous coding | 32% |
| MM04T | NT5C1B  | 5'-nucleotidase, cytosolic IB                                               | CCDS33150.1     | chr2_18766033-18766033_G_A    | 217A>V | Substitution | Nonsynonymous coding | 18% |
| MM04T | NT5C3B  | 5'-nucleotidase, cytosolic IIIB                                             | CCDS11410.1     | chr17_39983831-39983831_C_A   | 197K>N | Substitution | Nonsynonymous coding | 33% |
| MM04T | NTF3    | neurotrophin 3                                                              | CCDS44806.1     | chr12_5603687-5603687_C_T     | 116R>W | Substitution | Nonsynonymous coding | 32% |
| MM04T | NTN1    | netrin 1                                                                    | CCDS11148.1     | chr17_8926181-8926181_C_A     | 164S>Y | Substitution | Nonsynonymous coding | 32% |
| MM04T | NTN4    | netrin 4                                                                    | CCDS9054.1      | chr12_96180959-96180959_C_A   | 115E>X | Substitution | Nonsense             | 31% |
| MM04T | NTRK3   | neurotrophic tyrosine kinase, receptor, type 3                              | CCDS32322.1     | chr15_88476407-88476407_C_A   | 575K>N | Substitution | Nonsynonymous coding | 30% |
| MM04T | NTS     | neurotensin                                                                 | CCDS9029.1      | chr12_86276116-86276116_G_T   | 159R>I | Substitution | Nonsynonymous coding | 13% |
| MM04T | NUDCD3  | NudC domain containing 3                                                    | CCDS5490.2      | chr7_44425668-44425668_C_T    | 343R>Q | Substitution | Nonsynonymous coding | 36% |
| MM04T | NUDT18  | nudix (nucleoside diphosphate linked moiety X)-type motif 18                | ENST00000309188 | chr8_21965319-21965319_C_T    | 155R>Q | Substitution | Nonsynonymous coding | 28% |
| MM04T | NUDT5   | nudix (nucleoside diphosphate linked moiety X)-type motif 5                 | ENST00000444732 | chr10_12221028-12221028_G_A   | 79R>C  | Substitution | Nonsynonymous coding | 23% |
| MM04T | NUDT7   | nudix (nucleoside diphosphate linked moiety X)-type motif 7                 | CCDS42195.1     | chr16_7775490-7775490_G_T     | 120L>F | Substitution | Nonsynonymous coding | 25% |
| MM04T | NUF2    | NUF2, NDC80 kinetochore complex component, homolog ( <i>S. cerevisiae</i> ) | CCDS1245.1      | chr1_163297332-163297332_C_T  | 60R>X  | Substitution | Nonsense             | 27% |
| MM04T | NUMBL   | numb homolog ( <i>Drosophila</i> )-like                                     | CCDS12561.1     | chr19_41173827-41173827_G_A   | 459A>V | Substitution | Nonsynonymous coding | 33% |
| MM04T | NUP133  | nucleoporin 133kDa                                                          | ENST00000366678 | chr1_229634958-229634958_C_A  | 220E>X | Substitution | Nonsense             | 26% |
| MM04T | NUP153  | nucleoporin 153kDa                                                          | CCDS4541.1      | chr6_17629522-17629522_C_T    | 970E>K | Substitution | Nonsynonymous coding | 31% |
| MM04T | NUP155  | nucleoporin 155kDa                                                          | CCDS3921.1      | chr5_37314344-37314344_G_T    | 798L>I | Substitution | Nonsynonymous coding | 20% |
| MM04T | NUP205  | nucleoporin 205kDa                                                          | CCDS34759.1     | chr7_135287723-135287723_A_C  | 895N>H | Substitution | Nonsynonymous coding | 28% |
| MM04T | NUP205  | nucleoporin 205kDa                                                          | CCDS34759.1     | chr7_135289102-135289102_G_T  | 906G>V | Substitution | Nonsynonymous coding | 24% |
| MM04T | NUP210  | nucleoporin 210kDa                                                          | CCDS33704.1     | chr3_13395119-13395119_C_T    | 855A>T | Substitution | Nonsynonymous coding | 35% |
| MM04T | NUP210L | nucleoporin 210kDa-like                                                     | CCDS41399.1     | chr1_154101806-154101806_G_T  | 342S>Y | Substitution | Nonsynonymous coding | 17% |
| MM04T | NUP210L | nucleoporin 210kDa-like                                                     | CCDS41399.1     | chr1_154108372-154108372_C_A  | 309E>D | Substitution | Nonsynonymous coding | 17% |
| MM04T | NUP210L | nucleoporin 210kDa-like                                                     | CCDS41399.1     | chr1_154125221-154125221_G_A  | 111R>X | Substitution | Nonsense             | 20% |
| MM04T | NUP37   | nucleoporin 37kDa                                                           | CCDS9089.1      | chr12_102492897-102492897_C_T | 146D>N | Substitution | Nonsynonymous coding | 22% |
| MM04T | NUP88   | nucleoporin 88kDa                                                           | CCDS11070.1     | chr17_5294966-5294966_G_A     | 467R>X | Substitution | Nonsense             | 25% |
| MM04T | NVL     | nuclear VCP-like                                                            | CCDS1541.1      | chr1_224424257-224424257_C_T  | 773D>N | Substitution | Nonsynonymous coding | 27% |
| MM04T | NXF1    | nuclear RNA export factor 1                                                 | CCDS8037.1      | chr11_62570989-62570989_G_A   | 91R>C  | Substitution | Nonsynonymous coding | 43% |
| MM04T | NXF1    | nuclear RNA export factor 1                                                 | CCDS8037.1      | chr11_62571417-62571417_C_A   | 21R>I  | Substitution | Nonsynonymous coding | 22% |
| MM04T | NXF3    | nuclear RNA export factor 3                                                 | CCDS14503.1     | chrX_102334524-102334524_G_T  | 403L>I | Substitution | Nonsynonymous coding | 34% |
| MM04T | NXPE2   | neurexophilin and PC-esterase domain family, member 2                       | CCDS44738.1     | chr11_114576510-114576510_G_T | 312E>D | Substitution | Nonsynonymous coding | 17% |
| MM04T | NXPE3   | neurexophilin and PC-esterase domain family, member 3                       | CCDS2945.1      | chr3_101520161-101520161_G_A  | 59R>Q  | Substitution | Nonsynonymous coding | 34% |

|       |          |                                                                       |                 |                               |         |              |                      |     |
|-------|----------|-----------------------------------------------------------------------|-----------------|-------------------------------|---------|--------------|----------------------|-----|
| MM04T | NXPE4    | neurexophilin and PC-esterase domain family, member 4                 | CCDS41718.1     | chr11_114441872-114441872_C_A | 475E>X  | Substitution | Nonsense             | 25% |
| MM04T | NYAP2    | neuronal tyrosine-phosphorylated phosphoinositide-3-kinase adaptor 2  | CCDS46529.1     | chr2_226447697-226447697_C_T  | 522R>C  | Substitution | Nonsynonymous coding | 29% |
| MM04T | OAS2     | 2'-5'-oligoadenylate synthetase 2, 69/71kDa                           | CCDS31906.1     | chr12_113435557-113435557_C_T | 287A>V  | Substitution | Nonsynonymous coding | 42% |
| MM04T | OBSCN    | obscurin, cytoskeletal calmodulin and titin-interacting RhoGEF        | NM_001098623    | chr1_228402664-228402664_G_A  | 565E>K  | Substitution | Nonsynonymous coding | 29% |
| MM04T | OBSCN    | obscurin, cytoskeletal calmodulin and titin-interacting RhoGEF        | NM_001098623    | chr1_228554845-228554845_A_G  | 6533T>A | Substitution | Nonsynonymous coding | 34% |
| MM04T | OBSCN    | obscurin, cytoskeletal calmodulin and titin-interacting RhoGEF        | NM_001098623    | chr1_228559766-228559766_C_A  | 7096S>Y | Substitution | Nonsynonymous coding | 20% |
| MM04T | OC90     | otoconin 90                                                           | CCDS47919.1     | chr8_133041405-133041405_G_T  | 351C>X  | Substitution | Nonsense             | 33% |
| MM04T | OCRL     | oculocerebrorenal syndrome of Lowe                                    | CCDS35393.1     | chrX_128722235-128722235_C_A  | 779T>K  | Substitution | Nonsynonymous coding | 29% |
| MM04T | ODF2L    | outer dense fiber of sperm tails 2-like                               | CCDS30763.1     | chr1_86850427-86850427_C_A    | 102E>X  | Substitution | Nonsense             | 28% |
| MM04T | OGDH     | oxoglutarate (alpha-ketoglutarate) dehydrogenase (lipoamide)          | CCDS34627.1     | chr7_44736650-44736650_C_T    | 680R>W  | Substitution | Nonsynonymous coding | 29% |
| MM04T | OGT      | O-linked N-acetylglucosamine (GlcNAc) transferase                     | CCDS14414.1     | chrX_70782762-70782762_G_T    | 681Q>H  | Substitution | Nonsynonymous coding | 30% |
| MM04T | OGT      | O-linked N-acetylglucosamine (GlcNAc) transferase                     | CCDS14414.1     | chrX_70782770-70782770_C_T    | 684S>L  | Substitution | Nonsynonymous coding | 27% |
| MM04T | OLFM3    | olfactomedin 3                                                        | ENST00000338858 | chr1_102312522-102312522_G_T  | 3P>H    | Substitution | Nonsynonymous coding | 22% |
| MM04T | OLFM4    | olfactomedin 4                                                        | CCDS9440.1      | chr13_53624884-53624884_C_A   | 504S>Y  | Substitution | Nonsynonymous coding | 21% |
| MM04T | OLFML1   | olfactomedin-like 1                                                   | CCDS7779.1      | chr11_7509403-7509403_G_T     | 59E>X   | Substitution | Nonsense             | 17% |
| MM04T | OLFML2B  | olfactomedin-like 2B                                                  | CCDS1236.1      | chr1_161953871-161953871_C_T  | 616G>D  | Substitution | Nonsynonymous coding | 34% |
| MM04T | OPA1     | optic atrophy 1 (autosomal dominant)                                  | CCDS33917.1     | chr3_193382781-193382781_C_A  | 907S>Y  | Substitution | Nonsynonymous coding | 29% |
| MM04T | OPN1SW   | opsin 1 (cone pigments), short-wave-sensitive                         | CCDS5806.1      | chr7_128414556-128414556_T_G  | 228K>T  | Substitution | Nonsynonymous coding | 27% |
| MM04T | OPTN     | optineurin                                                            | CCDS7094.1      | chr10_13152292-13152292_A_T   | 62N>I   | Substitution | Nonsynonymous coding | 34% |
| MM04T | OR10A7   | olfactory receptor, family 10, subfamily A, member 7                  | CCDS31815.1     | chr12_55614848-55614848_C_A   | 14L>I   | Substitution | Nonsynonymous coding | 32% |
| MM04T | OR10AB1P | olfactory receptor, family 10, subfamily AB, member 1 pseudogene      | ENST00000317359 | chr11_7750304-7750304_G_A     | 130R>H  | Substitution | Nonsynonymous coding | 30% |
| MM04T | OR10D3   | olfactory receptor, family 10, subfamily D, member 3 (non-functional) | ENST00000318666 | chr11_124056323-124056323_C_T | 116T>M  | Substitution | Nonsynonymous coding | 31% |
| MM04T | OR10G7   | olfactory receptor, family 10, subfamily G, member 7                  | CCDS31705.1     | chr11_123908824-123908824_C_A | 295K>N  | Substitution | Nonsynonymous coding | 32% |
| MM04T | OR10J1   | olfactory receptor, family 10, subfamily J, member 1                  | CCDS1185.1      | chr1_159410402-159410402_C_T  | 285S>L  | Substitution | Nonsynonymous coding | 10% |
| MM04T | OR10Q1   | olfactory receptor, family 10, subfamily Q, member 1                  | CCDS31547.1     | chr11_57996257-57996257_G_T   | 31L>I   | Substitution | Nonsynonymous coding | 26% |
| MM04T | OR10R2   | olfactory receptor, family 10, subfamily R, member 2                  | CCDS30898.1     | chr1_158450217-158450217_T_A  | 184F>I  | Substitution | Nonsynonymous coding | 35% |
| MM04T | OR10X1   | olfactory receptor, family 10, subfamily X, member 1                  | CCDS30900.1     | chr1_158548845-158548845_C_T  | 282G>E  | Substitution | Nonsynonymous coding | 23% |
| MM04T | OR10Z1   | olfactory receptor, family 10, subfamily Z, member 1                  | CCDS30901.1     | chr1_158577122-158577122_G_T  | 298Q>H  | Substitution | Nonsynonymous coding | 17% |
| MM04T | OR11H4   | olfactory receptor, family 11, subfamily H, member 4                  | CCDS32034.1     | chr14_20711694-20711694_C_A   | 248F>L  | Substitution | Nonsynonymous coding | 34% |
| MM04T | OR11H6   | olfactory receptor, family 11, subfamily H, member 6                  | CCDS32033.1     | chr14_20691973-20691973_C_A   | 35F>L   | Substitution | Nonsynonymous coding | 30% |
| MM04T | OR12D3   | olfactory receptor, family 12, subfamily D, member 3                  | ENST00000396806 | chr6_29236265-29236265_C_A    | 308D>Y  | Substitution | Nonsynonymous coding | 26% |
| MM04T | OR14J1   | olfactory receptor, family 14, subfamily J, member 1                  | CCDS34362.1     | chr6_29274738-29274738_C_A    | 91S>Y   | Substitution | Nonsynonymous coding | 30% |

|       |        |                                                      |                 |                              |        |              |                      |     |
|-------|--------|------------------------------------------------------|-----------------|------------------------------|--------|--------------|----------------------|-----|
| MM04T | OR1L1  | olfactory receptor, family 1, subfamily L, member 1  | CCDS35127.1     | chr9_125424594-125424594_G_T | 250M>I | Substitution | Nonsynonymous coding | 35% |
| MM04T | OR1L3  | olfactory receptor, family 1, subfamily L, member 3  | CCDS35128.1     | chr9_125437431-125437431_G_T | 8R>I   | Substitution | Nonsynonymous coding | 19% |
| MM04T | OR1L8  | olfactory receptor, family 1, subfamily L, member 8  | CCDS35124.1     | chr9_125330302-125330302_A_C | 152F>C | Substitution | Nonsynonymous coding | 35% |
| MM04T | OR1L8  | olfactory receptor, family 1, subfamily L, member 8  | CCDS35124.1     | chr9_125330591-125330591_G_T | 56L>I  | Substitution | Nonsynonymous coding | 18% |
| MM04T | OR1M1  | olfactory receptor, family 1, subfamily M, member 1  | CCDS32896.1     | chr19_9204414-9204414_G_A    | 165R>H | Substitution | Nonsynonymous coding | 34% |
| MM04T | OR1N1  | olfactory receptor, family 1, subfamily N, member 1  | CCDS6844.1      | chr9_125289393-125289393_G_T | 60F>L  | Substitution | Nonsynonymous coding | 17% |
| MM04T | OR2A12 | olfactory receptor, family 2, subfamily A, member 12 | CCDS43670.1     | chr7_143792299-143792299_C_A | 33F>L  | Substitution | Nonsynonymous coding | 26% |
| MM04T | OR2A2  | olfactory receptor, family 2, subfamily A, member 2  | CCDS43671.1     | chr7_143807220-143807220_C_T | 182S>F | Substitution | Nonsynonymous coding | 21% |
| MM04T | OR2B2  | olfactory receptor, family 2, subfamily B, member 2  | CCDS4641.1      | chr6_27879581-27879581_C_T   | 173E>K | Substitution | Nonsynonymous coding | 31% |
| MM04T | OR2B3  | olfactory receptor, family 2, subfamily B, member 3  | CCDS34358.1     | chr6_29054524-29054524_G_A   | 168R>C | Substitution | Nonsynonymous coding | 25% |
| MM04T | OR2B3  | olfactory receptor, family 2, subfamily B, member 3  | CCDS34358.1     | chr6_29054693-29054693_C_G   | 111E>D | Substitution | Nonsynonymous coding | 26% |
| MM04T | OR2D2  | olfactory receptor, family 2, subfamily D, member 2  | CCDS31416.1     | chr11_69131115-69131115_A_C  | 206I>S | Substitution | Nonsynonymous coding | 25% |
| MM04T | OR2D2  | olfactory receptor, family 2, subfamily D, member 2  | CCDS31416.1     | chr11_6913436-6913436_G_C    | 99A>G  | Substitution | Nonsynonymous coding | 25% |
| MM04T | OR2F2  | olfactory receptor, family 2, subfamily F, member 2  | CCDS43666.1     | chr7_143632612-143632612_G_A | 96S>N  | Substitution | Nonsynonymous coding | 15% |
| MM04T | OR2F2  | olfactory receptor, family 2, subfamily F, member 2  | CCDS43666.1     | chr7_143632949-143632949_G_T | 208M>I | Substitution | Nonsynonymous coding | 29% |
| MM04T | OR2G3  | olfactory receptor, family 2, subfamily G, member 3  | CCDS31093.1     | chr1_247769133-247769133_A_C | 82L>F  | Substitution | Nonsynonymous coding | 27% |
| MM04T | OR2W1  | olfactory receptor, family 2, subfamily W, member 1  | CCDS4656.1      | chr6_29012422-29012422_G_T   | 177F>L | Substitution | Nonsynonymous coding | 32% |
| MM04T | OR2W5  | olfactory receptor, family 2, subfamily W, member 5  | NM_001004698    | chr1_247654969-247654969_G_T | 180E>D | Substitution | Nonsynonymous coding | 20% |
| MM04T | OR2Y1  | olfactory receptor, family 2, subfamily Y, member 1  | CCDS34323.1     | chr5_180167052-180167052_T_G | 3S>R   | Substitution | Nonsynonymous coding | 33% |
| MM04T | OR3A1  | olfactory receptor, family 3, subfamily A, member 1  | CCDS11023.1     | chr17_3195618-3195618_G_A    | 87R>C  | Substitution | Nonsynonymous coding | 33% |
| MM04T | OR4A15 | olfactory receptor, family 4, subfamily A, member 15 | CCDS31500.1     | chr11_55135537-55135537_T_G  | 60L>V  | Substitution | Nonsynonymous coding | 33% |
| MM04T | OR4A15 | olfactory receptor, family 4, subfamily A, member 15 | CCDS31500.1     | chr11_55135924-55135924_C_T  | 189L>F | Substitution | Nonsynonymous coding | 20% |
| MM04T | OR4C3  | olfactory receptor, family 4, subfamily C, member 3  | CCDS31489.1     | chr11_48347310-48347310_C_T  | 273A>V | Substitution | Nonsynonymous coding | 11% |
| MM04T | OR4C5  | olfactory receptor, family 4, subfamily C, member 5  | ENST00000319813 | chr11_48387495-48387495_G_T  | 175L>I | Substitution | Nonsynonymous coding | 21% |
| MM04T | OR4C6  | olfactory receptor, family 4, subfamily C, member 6  | CCDS31506.1     | chr11_55433463-55433463_C_A  | 274S>X | Substitution | Nonsense             | 35% |
| MM04T | OR4D11 | olfactory receptor, family 4, subfamily D, member 11 | CCDS31563.1     | chr11_59271968-59271968_C_A  | 307P>H | Substitution | Nonsynonymous coding | 20% |
| MM04T | OR4K13 | olfactory receptor, family 4, subfamily K, member 13 | CCDS32028.1     | chr14_20502003-20502003_T_G  | 305*>Y | Substitution | Nonsynonymous coding | 27% |
| MM04T | OR4M2  | olfactory receptor, family 4, subfamily M, member 2  | CCDS32172.1     | chr15_22369507-22369507_A_C  | 311K>T | Substitution | Nonsynonymous coding | 11% |
| MM04T | OR4N5  | olfactory receptor, family 4, subfamily N, member 5  | CCDS32031.1     | chr14_20612709-20612709_C_A  | 272S>Y | Substitution | Nonsynonymous coding | 26% |
| MM04T | OR4Q3  | olfactory receptor, family 4, subfamily Q, member 3  | CCDS32020.1     | chr14_20215840-20215840_A_G  | 85D>G  | Substitution | Nonsynonymous coding | 35% |
| MM04T | OR51B5 | olfactory receptor, family 51, subfamily B, member 5 | CCDS31378.1     | chr11_5364553-5364553_C_A    | 68D>Y  | Substitution | Nonsynonymous coding | 20% |
| MM04T | OR51G1 | olfactory receptor, family 51, subfamily G, member 1 | CCDS31366.1     | chr11_4944776-4944776_C_T    | 265R>H | Substitution | Nonsynonymous coding | 29% |

|       |         |                                                                        |                 |                              |        |              |                      |     |
|-------|---------|------------------------------------------------------------------------|-----------------|------------------------------|--------|--------------|----------------------|-----|
| MM04T | OR51G1  | olfactory receptor, family 51, subfamily G, member 1                   | CCDS31366.1     | chr11_4945104-4945104_G_T    | 156L>I | Substitution | Nonsynonymous coding | 24% |
| MM04T | OR51J1  | olfactory receptor, family 51, subfamily J, member 1 (gene/pseudogene) | ENST00000332043 | chr11_5424719-5424719_C_T    | 298T>I | Substitution | Nonsynonymous coding | 24% |
| MM04T | OR51S1  | olfactory receptor, family 51, subfamily S, member 1                   | CCDS31362.1     | chr11_4869964-4869964_G_A    | 159R>X | Substitution | Nonsense             | 36% |
| MM04T | OR51T1  | olfactory receptor, family 51, subfamily T, member 1                   | CCDS31363.1     | chr11_4903053-4903053_C_T    | 2T>I   | Substitution | Nonsynonymous coding | 33% |
| MM04T | OR52A5  | olfactory receptor, family 52, subfamily A, member 5                   | CCDS31373.1     | chr11_5153355-5153355_C_A    | 173R>L | Substitution | Nonsynonymous coding | 22% |
| MM04T | OR52B4  | olfactory receptor, family 52, subfamily B, member 4                   | CCDS41609.1     | chr11_4389363-4389363_G_A    | 55R>C  | Substitution | Nonsynonymous coding | 33% |
| MM04T | OR52D1  | olfactory receptor, family 52, subfamily D, member 1                   | CCDS31384.1     | chr11_5510109-5510109_T_G    | 58L>R  | Substitution | Nonsynonymous coding | 31% |
| MM04T | OR52E8  | olfactory receptor, family 52, subfamily E, member 8                   | CCDS31400.1     | chr11_5878464-5878464_T_C    | 157R>G | Substitution | Nonsynonymous coding | 28% |
| MM04T | OR52H1  | olfactory receptor, family 52, subfamily H, member 1                   | CCDS31386.1     | chr11_5565829-5565829_C_A    | 309D>Y | Substitution | Nonsynonymous coding | 14% |
| MM04T | OR52I1  | olfactory receptor, family 52, subfamily I, member 1                   | ENST00000450052 | chr11_4615383-4615383_T_C    | 64Y>H  | Substitution | Nonsynonymous coding | 28% |
| MM04T | OR52K3P | olfactory receptor, family 52, subfamily K, member 3 pseudogene        | ENST00000416879 | chr11_4496780-4496780_C_A    | 31A>D  | Substitution | Nonsynonymous coding | 25% |
| MM04T | OR52N1  | olfactory receptor, family 52, subfamily N, member 1                   | CCDS31398.1     | chr11_5809377-5809377_G_T    | 224L>I | Substitution | Nonsynonymous coding | 29% |
| MM04T | OR52N2  | olfactory receptor, family 52, subfamily N, member 2                   | CCDS31399.1     | chr11_5842124-5842124_G_A    | 187A>T | Substitution | Nonsynonymous coding | 30% |
| MM04T | OR56A1  | olfactory receptor, family 56, subfamily A, member 1                   | CCDS31405.1     | chr11_6048170-6048170_A_C    | 255I>M | Substitution | Nonsynonymous coding | 32% |
| MM04T | OR5C1   | olfactory receptor, family 5, subfamily C, member 1                    | CCDS35131.1     | chr9_125551770-125551770_C_T | 187P>S | Substitution | Nonsynonymous coding | 32% |
| MM04T | OR5D14  | olfactory receptor, family 5, subfamily D, member 14                   | CCDS31508.1     | chr11_55563147-55563147_T_G  | 39I>S  | Substitution | Nonsynonymous coding | 23% |
| MM04T | OR5D16  | olfactory receptor, family 5, subfamily D, member 16                   | CCDS31512.1     | chr11_55607198-55607198_T_G  | 324F>C | Substitution | Nonsynonymous coding | 33% |
| MM04T | OR5H2   | olfactory receptor, family 5, subfamily H, member 2                    | CCDS33801.1     | chr3_98001970-98001970_C_T   | 80S>F  | Substitution | Nonsynonymous coding | 36% |
| MM04T | OR5H2   | olfactory receptor, family 5, subfamily H, member 2                    | CCDS33801.1     | chr3_98002350-98002350_T_G   | 207L>V | Substitution | Nonsynonymous coding | 30% |
| MM04T | OR5K1   | olfactory receptor, family 5, subfamily K, member 1                    | CCDS43115.1     | chr3_98189280-98189280_C_A   | 287P>H | Substitution | Nonsynonymous coding | 38% |
| MM04T | OR5K2   | olfactory receptor, family 5, subfamily K, member 2                    | CCDS33804.1     | chr3_98217174-98217174_C_A   | 217S>Y | Substitution | Nonsynonymous coding | 19% |
| MM04T | OR5K3   | olfactory receptor, family 5, subfamily K, member 3                    | CCDS33803.1     | chr3_98110127-98110127_T_G   | 206I>M | Substitution | Nonsynonymous coding | 39% |
| MM04T | OR5M11  | olfactory receptor, family 5, subfamily M, member 11                   | NM_001005245    | chr11_56310406-56310406_C_A  | 110E>X | Substitution | Nonsense             | 18% |
| MM04T | OR5T1   | olfactory receptor, family 5, subfamily T, member 1                    | CCDS31525.1     | chr11_56043272-56043272_G_A  | 53G>D  | Substitution | Nonsynonymous coding | 30% |
| MM04T | OR5T2   | olfactory receptor, family 5, subfamily T, member 2                    | CCDS31523.1     | chr11_55999864-55999864_C_A  | 266K>N | Substitution | Nonsynonymous coding | 21% |
| MM04T | OR5T3   | olfactory receptor, family 5, subfamily T, member 3                    | CCDS31524.1     | chr11_56020307-56020307_T_C  | 211M>T | Substitution | Nonsynonymous coding | 29% |
| MM04T | OR5W2   | olfactory receptor, family 5, subfamily W, member 2                    | CCDS31513.1     | chr11_55681928-55681928_C_T  | 44G>E  | Substitution | Nonsynonymous coding | 26% |
| MM04T | OR6B1   | olfactory receptor, family 6, subfamily B, member 1                    | CCDS43667.1     | chr7_143701101-143701101_G_T | 4E>D   | Substitution | Nonsynonymous coding | 22% |
| MM04T | OR6B2   | olfactory receptor, family 6, subfamily B, member 2                    | CCDS46559.1     | chr2_240968930-240968930_C_T | 306G>D | Substitution | Nonsynonymous coding | 24% |
| MM04T | OR6C1   | olfactory receptor, family 6, subfamily C, member 1                    | CCDS31818.1     | chr12_55715066-55715066_C_A  | 228S>Y | Substitution | Nonsynonymous coding | 30% |
| MM04T | OR6C4   | olfactory receptor, family 6, subfamily C, member 4                    | CCDS31827.1     | chr12_55945308-55945308_T_A  | 100F>I | Substitution | Nonsynonymous coding | 23% |
| MM04T | OR6C74  | olfactory receptor, family 6, subfamily C, member 74                   | CCDS31816.1     | chr12_55641774-55641774_G_T  | 235A>S | Substitution | Nonsynonymous coding | 31% |

|       |         |                                                                |                 |                               |         |              |                      |     |
|-------|---------|----------------------------------------------------------------|-----------------|-------------------------------|---------|--------------|----------------------|-----|
| MM04T | OR6C75  | olfactory receptor, family 6, subfamily C, member 75           | CCDS31820.1     | chr12_55758982-55758982_C_A   | 30L>I   | Substitution | Nonsynonymous coding | 25% |
| MM04T | OR6C75  | olfactory receptor, family 6, subfamily C, member 75           | CCDS31820.1     | chr12_55759820-55759820_C_A   | 309S>Y  | Substitution | Nonsynonymous coding | 21% |
| MM04T | OR6K2   | olfactory receptor, family 6, subfamily K, member 2            | CCDS30902.1     | chr1_158670028-158670028_G_T  | 139L>I  | Substitution | Nonsynonymous coding | 35% |
| MM04T | OR6M1   | olfactory receptor, family 6, subfamily M, member 1            | CCDS31696.1     | chr11_123676797-123676797_C_A | 87E>D   | Substitution | Nonsynonymous coding | 30% |
| MM04T | OR6N2   | olfactory receptor, family 6, subfamily N, member 2            | CCDS30906.1     | chr1_158747097-158747097_G_T  | 110S>Y  | Substitution | Nonsynonymous coding | 32% |
| MM04T | OR6S1   | olfactory receptor, family 6, subfamily S, member 1            | CCDS32038.1     | chr14_21109625-21109625_T_C   | 76T>A   | Substitution | Nonsynonymous coding | 33% |
| MM04T | OR6V1   | olfactory receptor, family 6, subfamily V, member 1            | CCDS47728.1     | chr7_142749540-142749540_C_A  | 35L>I   | Substitution | Nonsynonymous coding | 32% |
| MM04T | OR7D4   | olfactory receptor, family 7, subfamily D, member 4            | CCDS32901.1     | chr19_9324983-9324983_G_T     | 177F>L  | Substitution | Nonsynonymous coding | 18% |
| MM04T | OR8F1P  | olfactory receptor, family 8, subfamily F, member 1 pseudogene | ENST00000318460 | chr11_124078772-124078772_G_T | 253D>Y  | Substitution | Nonsynonymous coding | 33% |
| MM04T | OR8G1   | olfactory receptor, family 8, subfamily G, member 1            | ENST00000341493 | chr11_124120956-124120956_C_A | 178F>L  | Substitution | Nonsynonymous coding | 37% |
| MM04T | OR8G1   | olfactory receptor, family 8, subfamily G, member 1            | ENST00000341493 | chr11_124121015-124121015_T_G | 198L>R  | Substitution | Nonsynonymous coding | 34% |
| MM04T | OR8U1   | olfactory receptor, family 8, subfamily U, member 1            | CCDS41647.1     | chr11_56143446-56143446_C_A   | 116A>D  | Substitution | Nonsynonymous coding | 21% |
| MM04T | OR9I1   | olfactory receptor, family 9, subfamily I, member 1            | CCDS31542.1     | chr11_57886203-57886203_G_T   | 238F>L  | Substitution | Nonsynonymous coding | 38% |
| MM04T | OSBPL10 | oxysterol binding protein-like 10                              | CCDS2651.1      | chr3_31921248-31921248_C_T    | 119R>Q  | Substitution | Nonsynonymous coding | 31% |
| MM04T | OSBPL11 | oxysterol binding protein-like 11                              | CCDS3033.1      | chr3_125286396-125286396_C_T  | 237R>Q  | Substitution | Nonsynonymous coding | 28% |
| MM04T | OSBPL1A | oxysterol binding protein-like 1A                              | CCDS11884.1     | chr18_21759703-21759703_G_A   | 637R>X  | Substitution | Nonsense             | 23% |
| MM04T | OSBPL6  | oxysterol binding protein-like 6                               | CCDS2278.1      | chr2_179238741-179238741_C_T  | 511S>L  | Substitution | Nonsynonymous coding | 42% |
| MM04T | OSBPL8  | oxysterol binding protein-like 8                               | CCDS31862.1     | chr12_76765242-76765242_A_C   | 680D>E  | Substitution | Nonsynonymous coding | 29% |
| MM04T | OSGEP   | O-sialoglycoprotein endopeptidase                              | CCDS9549.1      | chr14_20917350-20917350_G_A   | 163R>C  | Substitution | Nonsynonymous coding | 28% |
| MM04T | OSGIN1  | oxidative stress induced growth inhibitor 1                    | CCDS10938.1     | chr16_83998674-83998674_C_T   | 249R>C  | Substitution | Nonsynonymous coding | 27% |
| MM04T | OTOA    | otoancorin                                                     | CCDS10600.2     | chr16_21693112-21693112_C_T   | 78S>F   | Substitution | Nonsynonymous coding | 32% |
| MM04T | OTOA    | otoancorin                                                     | CCDS10600.2     | chr16_21693118-21693118_A_G   | 80N>S   | Substitution | Nonsynonymous coding | 33% |
| MM04T | OTOA    | otoancorin                                                     | CCDS10600.2     | chr16_21728281-21728281_C_A   | 514F>L  | Substitution | Nonsynonymous coding | 26% |
| MM04T | OTOG    | otogelin                                                       | ENST00000399391 | chr11_17577421-17577421_G_T   | 224K>N  | Substitution | Nonsynonymous coding | 22% |
| MM04T | OTOG    | otogelin                                                       | ENST00000399391 | chr11_17650784-17650784_G_T   | 2223Q>H | Substitution | Nonsynonymous coding | 28% |
| MM04T | OTOG    | otogelin                                                       | ENST00000399391 | chr11_17656626-17656626_G_T   | NA      | Substitution | Splice site acceptor | 13% |
| MM04T | OTOGL   | otogelin-like                                                  | ENST00000458043 | chr12_80732934-80732934_T_C   | 3V>A    | Substitution | Nonsynonymous coding | 24% |
| MM04T | OTOGL   | otogelin-like                                                  | ENST00000458043 | chr12_80749626-80749626_G_A   | 258E>K  | Substitution | Nonsynonymous coding | 32% |
| MM04T | OTUD3   | OTU domain containing 3                                        | CCDS41279.1     | chr1_20232935-20232935_G_T    | 282E>D  | Substitution | Nonsynonymous coding | 30% |
| MM04T | OTUD4   | OTU domain containing 4                                        | CCDS47139.1     | chr4_146072045-146072045_C_A  | 262K>N  | Substitution | Nonsynonymous coding | 23% |
| MM04T | OTUD4   | OTU domain containing 4                                        | CCDS47139.1     | chr4_146077114-146077114_C_T  | 157G>R  | Substitution | Nonsynonymous coding | 18% |
| MM04T | OTUD4   | OTU domain containing 4                                        | CCDS47139.1     | chr4_146095825-146095825_C_A  | 12E>D   | Substitution | Nonsynonymous coding | 32% |



|       |             |                                                                   |             |                               |         |              |                      |     |
|-------|-------------|-------------------------------------------------------------------|-------------|-------------------------------|---------|--------------|----------------------|-----|
| MM04T | OTUD7B      | OTU domain containing 7B                                          | CCDS41389.1 | chr1_149936181-149936181_C_T  | 233R>H  | Substitution | Nonsynonymous coding | 30% |
| MM04T | OVGP1       | oviductal glycoprotein 1, 120kDa                                  | CCDS834.1   | chr1_111965561-111965561_C_T  | 199R>H  | Substitution | Nonsynonymous coding | 29% |
| MM04T | OXCT1       | 3-oxoacid CoA transferase 1                                       | CCDS3937.1  | chr5_41861444-41861444_C_A    | 84G>X   | Substitution | Nonsense             | 21% |
| MM04T | OXCT2       | 3-oxoacid CoA transferase 2                                       | CCDS445.1   | chr1_40236336-40236336_G_T    | 198L>I  | Substitution | Nonsynonymous coding | 21% |
| MM04T | P2RX1       | purinergic receptor P2X, ligand-gated ion channel, 1              | CCDS11040.1 | chr17_3819446-3819446_C_T     | 25R>H   | Substitution | Nonsynonymous coding | 33% |
| MM04T | P2RX7       | purinergic receptor P2X, ligand-gated ion channel, 7              | CCDS9213.1  | chr12_121622580-121622580_A_G | 588Y>C  | Substitution | Nonsynonymous coding | 47% |
| MM04T | P2RY10      | purinergic receptor P2Y, G-protein coupled, 10                    | CCDS14442.1 | chrX_78216286-78216286_G_A    | 90R>Q   | Substitution | Nonsynonymous coding | 22% |
| MM04T | P2RY10      | purinergic receptor P2Y, G-protein coupled, 10                    | CCDS14442.1 | chrX_78216809-78216809_T_G    | 264I>M  | Substitution | Nonsynonymous coding | 29% |
| MM04T | P2RY10      | purinergic receptor P2Y, G-protein coupled, 10                    | CCDS14442.1 | chrX_78216997-78216997_G_A    | 327R>H  | Substitution | Nonsynonymous coding | 25% |
| MM04T | P2RY13      | purinergic receptor P2Y, G-protein coupled, 13                    | CCDS3158.2  | chr3_151045787-151045787_A_C  | 353L>V  | Substitution | Nonsynonymous coding | 37% |
| MM04T | P2RY4       | pyrimidinergic receptor P2Y, G-protein coupled, 4                 | CCDS14398.1 | chrX_69479323-69479323_C_T    | 51G>D   | Substitution | Nonsynonymous coding | 36% |
| MM04T | PABPC3      | poly(A) binding protein, cytoplasmic 3                            | CCDS9311.1  | chr13_25670617-25670617_G_A   | 94R>Q   | Substitution | Nonsynonymous coding | 26% |
| MM04T | PAG1        | phosphoprotein associated with glycosphingolipid microdomains 1   | CCDS6227.1  | chr8_81889006-81889006_G_T    | 358L>I  | Substitution | Nonsynonymous coding | 25% |
| MM04T | PAG1        | phosphoprotein associated with glycosphingolipid microdomains 1   | CCDS6227.1  | chr8_81899700-81899700_G_A    | 60P>L   | Substitution | Nonsynonymous coding | 20% |
| MM04T | PAGE3       | P antigen family, member 3 (prostate associated)                  | CCDS35307.1 | chrX_55290320-55290320_C_A    | 6R>I    | Substitution | Nonsynonymous coding | 45% |
| MM04T | PAK7        | p21 protein (Cdc42/Rac)-activated kinase 7                        | CCDS13107.1 | chr20_9561331-9561331_G_T     | 151L>I  | Substitution | Nonsynonymous coding | 14% |
| MM04T | PALB2       | partner and localizer of BRCA2                                    | CCDS32406.1 | chr16_23646440-23646440_C_A   | 476R>I  | Substitution | Nonsynonymous coding | 24% |
| MM04T | PALM2-AKAP2 | PALM2-AKAP2 readthrough                                           | CCDS35100.1 | chr9_112900331-112900331_C_T  | 836A>V  | Substitution | Nonsynonymous coding | 19% |
| MM04T | PALM2-AKAP2 | PALM2-AKAP2 readthrough                                           | CCDS35100.1 | chr9_112918757-112918757_G_A  | 1052E>K | Substitution | Nonsynonymous coding | 35% |
| MM04T | PAMR1       | peptidase domain containing associated with muscle regeneration 1 | CCDS7898.1  | chr11_35461197-35461197_G_T   | 377L>I  | Substitution | Nonsynonymous coding | 11% |
| MM04T | PAPD4       | PAP associated domain containing 4                                | CCDS4048.1  | chr5_78919307-78919307_G_T    | 154D>Y  | Substitution | Nonsynonymous coding | 26% |
| MM04T | PAPLN       | papilin, proteoglycan-like sulfated glycoprotein                  | CCDS32114.1 | chr14_73726043-73726043_G_A   | 565R>Q  | Substitution | Nonsynonymous coding | 21% |
| MM04T | PAPLN       | papilin, proteoglycan-like sulfated glycoprotein                  | CCDS32114.1 | chr14_73729508-73729508_C_T   | 872A>V  | Substitution | Nonsynonymous coding | 25% |
| MM04T | PAPLN       | papilin, proteoglycan-like sulfated glycoprotein                  | CCDS32114.1 | chr14_73731024-73731024_G_T   | 962K>N  | Substitution | Nonsynonymous coding | 20% |
| MM04T | PAPLN       | papilin, proteoglycan-like sulfated glycoprotein                  | CCDS32114.1 | chr14_73731338-73731338_T_G   | 983F>C  | Substitution | Nonsynonymous coding | 29% |
| MM04T | PAPOLA      | poly(A) polymerase alpha                                          | CCDS9946.1  | chr14_96997889-96997889_A_C   | 191K>N  | Substitution | Nonsynonymous coding | 34% |
| MM04T | PAPOLA      | poly(A) polymerase alpha                                          | CCDS9946.1  | chr14_96998962-96998962_A_C   | 271K>T  | Substitution | Nonsynonymous coding | 41% |
| MM04T | PAPOLA      | poly(A) polymerase alpha                                          | CCDS9946.1  | chr14_97009137-97009137_G_A   | 399R>Q  | Substitution | Nonsynonymous coding | 40% |
| MM04T | PAPOLB      | poly(A) polymerase beta (testis specific)                         | NM_020144   | chr7_4899813-4899813_C_T      | 543M>I  | Substitution | Nonsynonymous coding | 31% |
| MM04T | PAPOLB      | poly(A) polymerase beta (testis specific)                         | NM_020144   | chr7_4900274-4900274_C_T      | 390E>K  | Substitution | Nonsynonymous coding | 32% |
| MM04T | PAPOLB      | poly(A) polymerase beta (testis specific)                         | NM_020144   | chr7_4900623-4900623_G_T      | 273F>L  | Substitution | Nonsynonymous coding | 20% |
| MM04T | PAPOLB      | poly(A) polymerase beta (testis specific)                         | NM_020144   | chr7_4900859-4900859_C_A      | 195D>Y  | Substitution | Nonsynonymous coding | 21% |

|       |        |                                                          |             |                              |         |              |                      |     |
|-------|--------|----------------------------------------------------------|-------------|------------------------------|---------|--------------|----------------------|-----|
| MM04T | PAPOLB | poly(A) polymerase beta (testis specific)                | NM_020144   | chr7_4901340-4901340_C_A     | 34E>D   | Substitution | Nonsynonymous coding | 37% |
| MM04T | PAPPA  | pregnancy-associated plasma protein A, pappalysin 1      | CCDS6813.1  | chr9_119033623-119033623_G_A | 961D>N  | Substitution | Nonsynonymous coding | 22% |
| MM04T | PAPPA  | pregnancy-associated plasma protein A, pappalysin 1      | CCDS6813.1  | chr9_119115026-119115026_T_C | 1336S>P | Substitution | Nonsynonymous coding | 31% |
| MM04T | PAPPA2 | pappalysin 2                                             | CCDS41438.1 | chr1_176738873-176738873_T_G | 1485F>C | Substitution | Nonsynonymous coding | 38% |
| MM04T | PAPSS2 | 3'-phosphoadenosine 5'-phosphosulfate synthase 2         | CCDS44453.1 | chr10_89501057-89501057_G_T  | 384W>C  | Substitution | Nonsynonymous coding | 28% |
| MM04T | PAQR7  | progesterin and adipoQ receptor family member VII        | CCDS267.1   | chr1_26189844-26189844_C_T   | 163E>K  | Substitution | Nonsynonymous coding | 22% |
| MM04T | PARD3  | par-3 partitioning defective 3 homolog (C. elegans)      | CCDS7178.1  | chr10_34626229-34626229_C_T  | 848R>Q  | Substitution | Nonsynonymous coding | 38% |
| MM04T | PARD3B | par-3 partitioning defective 3 homolog B (C. elegans)    | CCDS42806.1 | chr2_206480337-206480337_C_T | 1078P>S | Substitution | Nonsynonymous coding | 18% |
| MM04T | PARD6B | par-6 partitioning defective 6 homolog beta (C. elegans) | CCDS33485.1 | chr20_49366780-49366780_G_A  | 292E>K  | Substitution | Nonsynonymous coding | 30% |
| MM04T | PARL   | presenilin associated, rhomboid-like                     | CCDS3248.1  | chr3_183584427-183584427_C_A | 150D>Y  | Substitution | Nonsynonymous coding | 27% |
| MM04T | PARN   | poly(A)-specific ribonuclease                            | CCDS45419.1 | chr16_14530620-14530620_G_A  | 625S>L  | Substitution | Nonsynonymous coding | 20% |
| MM04T | PARP11 | poly (ADP-ribose) polymerase family, member 11           | CCDS8523.2  | chr12_3938154-3938154_C_T    | 64E>K   | Substitution | Nonsynonymous coding | 21% |
| MM04T | PARP12 | poly (ADP-ribose) polymerase family, member 12           | CCDS5857.1  | chr7_139737542-139737542_T_G | 433K>Q  | Substitution | Nonsynonymous coding | 17% |
| MM04T | PARP14 | poly (ADP-ribose) polymerase family, member 14           | CCDS46894.1 | chr3_122420126-122420126_G_A | 909E>K  | Substitution | Nonsynonymous coding | 27% |
| MM04T | PARP14 | poly (ADP-ribose) polymerase family, member 14           | CCDS46894.1 | chr3_122437275-122437275_C_A | 1426S>X | Substitution | Nonsense             | 31% |
| MM04T | PARP15 | poly (ADP-ribose) polymerase family, member 15           | CCDS46893.1 | chr3_122335871-122335871_G_T | 287G>V  | Substitution | Nonsynonymous coding | 16% |
| MM04T | PARP15 | poly (ADP-ribose) polymerase family, member 15           | CCDS46893.1 | chr3_122340438-122340438_C_A | 404S>Y  | Substitution | Nonsynonymous coding | 26% |
| MM04T | PARP16 | poly (ADP-ribose) polymerase family, member 16           | CCDS10204.1 | chr15_65551837-65551837_C_T  | 294V>I  | Substitution | Nonsynonymous coding | 22% |
| MM04T | PARP2  | poly (ADP-ribose) polymerase 2                           | CCDS41910.1 | chr14_20813166-20813166_G_T  | 41R>I   | Substitution | Nonsynonymous coding | 21% |
| MM04T | PARVA  | parvin, alpha                                            | CCDS44541.1 | chr11_12518069-12518069_A_C  | 155Q>H  | Substitution | Nonsynonymous coding | 38% |
| MM04T | PASD1  | PAS domain containing 1                                  | CCDS35431.1 | chrX_150828252-150828252_C_A | 262S>Y  | Substitution | Nonsynonymous coding | 27% |
| MM04T | PASD1  | PAS domain containing 1                                  | CCDS35431.1 | chrX_150832727-150832727_G_T | 326E>D  | Substitution | Nonsynonymous coding | 18% |
| MM04T | PASK   | PAS domain containing serine/threonine kinase            | CCDS2545.1  | chr2_242066688-242066688_C_A | 548D>Y  | Substitution | Nonsynonymous coding | 29% |
| MM04T | PATZ1  | POZ (BTB) and AT hook containing zinc finger 1           | CCDS13894.1 | chr22_31731824-31731824_C_T  | 454R>Q  | Substitution | Nonsynonymous coding | 30% |
| MM04T | PAX7   | paired box 7                                             | CCDS186.1   | chr1_18962743-18962743_C_T   | 155S>L  | Substitution | Nonsynonymous coding | 26% |
| MM04T | PAXBP1 | PAX3 and PAX7 binding protein 1                          | CCDS13619.1 | chr21_34132284-34132284_C_A  | 333E>X  | Substitution | Nonsense             | 24% |
| MM04T | PBRM1  | polybromo 1                                              | CCDS2859.1  | chr3_52661328-52661328_G_T   | 469S>Y  | Substitution | Nonsynonymous coding | 21% |
| MM04T | PBX1   | pre-B-cell leukemia homeobox 1                           | CCDS1246.1  | chr1_164769105-164769105_G_A | 227R>H  | Substitution | Nonsynonymous coding | 14% |
| MM04T | PBX1   | pre-B-cell leukemia homeobox 1                           | CCDS1246.1  | chr1_164532474-164532474_G_T | NA      | Substitution | Splice site acceptor | 22% |
| MM04T | PBX3   | pre-B-cell leukemia homeobox 3                           | CCDS6865.1  | chr9_128692127-128692127_A_G | NA      | Substitution | Splice site donor    | 31% |
| MM04T | PCBP1  | poly(rC) binding protein 1                               | CCDS1898.1  | chr2_70315136-70315136_G_A   | 87M>I   | Substitution | Nonsynonymous coding | 23% |
| MM04T | PCBP1  | poly(rC) binding protein 1                               | CCDS1898.1  | chr2_70315660-70315660_C_T   | 262S>F  | Substitution | Nonsynonymous coding | 23% |

|       |         |                                    |             |                              |         |              |                      |     |
|-------|---------|------------------------------------|-------------|------------------------------|---------|--------------|----------------------|-----|
| MM04T | PCDH1   | protocadherin 1                    | CCDS4267.1  | chr5_141236997-141236997_C_T | 1047A>T | Substitution | Nonsynonymous coding | 27% |
| MM04T | PCDH1   | protocadherin 1                    | CCDS4267.1  | chr5_141243872-141243872_C_T | 675R>Q  | Substitution | Nonsynonymous coding | 33% |
| MM04T | PCDH1   | protocadherin 1                    | CCDS4267.1  | chr5_141244631-141244631_C_T | 422R>Q  | Substitution | Nonsynonymous coding | 21% |
| MM04T | PCDH10  | protocadherin 10                   | CCDS34063.1 | chr4_134076104-134076104_C_T | 908S>F  | Substitution | Nonsynonymous coding | 27% |
| MM04T | PCDH15  | protocadherin-related 15           | CCDS44404.1 | chr10_55581920-55581920_C_T  | 1858E>K | Substitution | Nonsynonymous coding | 27% |
| MM04T | PCDH15  | protocadherin-related 15           | CCDS44404.1 | chr10_55582522-55582522_G_T  | 1657S>Y | Substitution | Nonsynonymous coding | 23% |
| MM04T | PCDH15  | protocadherin-related 15           | CCDS44404.1 | chr10_55721637-55721637_G_A  | 962R>C  | Substitution | Nonsynonymous coding | 34% |
| MM04T | PCDH15  | protocadherin-related 15           | CCDS44404.1 | chr10_56138539-56138539_A_C  | NA      | Substitution | Splice site donor    | 33% |
| MM04T | PCDH15  | protocadherin-related 15           | CCDS44404.1 | chr10_55955586-55955586_C_A  | 388E>X  | Substitution | Nonsense             | 24% |
| MM04T | PCDH18  | protocadherin 18                   | CCDS34064.1 | chr4_138452153-138452153_C_A | 364E>X  | Substitution | Nonsense             | 40% |
| MM04T | PCDH19  | protocadherin 19                   | CCDS43976.1 | chrX_99661554-99661554_A_G   | 681F>S  | Substitution | Nonsynonymous coding | 15% |
| MM04T | PCDH20  | protocadherin 20                   | CCDS9442.2  | chr13_61986429-61986429_C_A  | 601E>D  | Substitution | Nonsynonymous coding | 33% |
| MM04T | PCDH20  | protocadherin 20                   | CCDS9442.2  | chr13_61987750-61987750_G_A  | 161A>V  | Substitution | Nonsynonymous coding | 33% |
| MM04T | PCDH9   | protocadherin 9                    | CCDS9444.1  | chr13_67477703-67477703_A_G  | 1024V>A | Substitution | Nonsynonymous coding | 27% |
| MM04T | PCDH9   | protocadherin 9                    | CCDS9444.1  | chr13_67800886-67800886_G_T  | 563L>M  | Substitution | Nonsynonymous coding | 35% |
| MM04T | PCDH9   | protocadherin 9                    | CCDS9444.1  | chr13_67802500-67802500_C_A  | 25E>X   | Substitution | Nonsense             | 36% |
| MM04T | PCDHA6  | protocadherin alpha 6              | CCDS4241.1  | chr5_140307263-140307263_A_C | 262E>D  | Substitution | Nonsynonymous coding | 36% |
| MM04T | PCDHA6  | protocadherin alpha 6              | CCDS47281.1 | chr5_140208487-140208487_G_T | 271E>X  | Substitution | Nonsense             | 25% |
| MM04T | PCDHA8  | protocadherin alpha 8              | CCDS34253.1 | chr5_140221633-140221633_G_A | 243E>K  | Substitution | Nonsynonymous coding | 38% |
| MM04T | PCDHB10 | protocadherin beta 10              | CCDS4252.1  | chr5_140572744-140572744_G_A | 207E>K  | Substitution | Nonsynonymous coding | 23% |
| MM04T | PCDHB12 | protocadherin beta 12              | CCDS4254.1  | chr5_140589590-140589590_C_T | 371R>X  | Substitution | Nonsense             | 28% |
| MM04T | PCDHB16 | protocadherin beta 16              | CCDS4251.1  | chr5_140562262-140562262_C_A | 43S>Y   | Substitution | Nonsynonymous coding | 42% |
| MM04T | PCDHB3  | protocadherin beta 3               | CCDS4245.1  | chr5_140480573-140480573_T_G | 114L>V  | Substitution | Nonsynonymous coding | 37% |
| MM04T | PCDHB4  | protocadherin beta 4               | CCDS4246.1  | chr5_140502262-140502262_C_T | 228R>X  | Substitution | Nonsense             | 31% |
| MM04T | PCDHB4  | protocadherin beta 4               | CCDS4246.1  | chr5_140502688-140502688_C_T | 370R>X  | Substitution | Nonsense             | 33% |
| MM04T | PCDHB5  | protocadherin beta 5               | CCDS4247.1  | chr5_140515911-140515911_G_A | 299E>K  | Substitution | Nonsynonymous coding | 34% |
| MM04T | PCDHB5  | protocadherin beta 5               | CCDS4247.1  | chr5_140516154-140516154_A_G | 380M>V  | Substitution | Nonsynonymous coding | 27% |
| MM04T | PCDHB6  | protocadherin beta 6               | CCDS4248.1  | chr5_140530293-140530293_C_A | 152P>H  | Substitution | Nonsynonymous coding | 31% |
| MM04T | PCDHB6  | protocadherin beta 6               | CCDS4248.1  | chr5_140530394-140530394_G_A | 186E>K  | Substitution | Nonsynonymous coding | 32% |
| MM04T | PCDHB7  | protocadherin beta 7               | CCDS4249.1  | chr5_140552873-140552873_C_A | 153L>I  | Substitution | Nonsynonymous coding | 33% |
| MM04T | PCDHGA1 | protocadherin gamma subfamily A, 1 | CCDS34256.1 | chr5_140710873-140710873_C_A | 208H>N  | Substitution | Nonsynonymous coding | 31% |
| MM04T | PCDHGA1 | protocadherin gamma subfamily A, 1 | CCDS34256.1 | chr5_140712719-140712719_C_T | 823S>F  | Substitution | Nonsynonymous coding | 37% |

|       |         |                                                                              |                 |                               |         |              |                      |     |
|-------|---------|------------------------------------------------------------------------------|-----------------|-------------------------------|---------|--------------|----------------------|-----|
| MM04T | PCDHGA2 | protocadherin gamma subfamily A, 2                                           | CCDS47289.1     | chr5_140719944-140719944_C_A  | 469A>D  | Substitution | Nonsynonymous coding | 24% |
| MM04T | PCDHGA5 | protocadherin gamma subfamily A, 5                                           | NM_018918       | chr5_140744334-140744334_C_T  | 146A>V  | Substitution | Nonsynonymous coding | 40% |
| MM04T | PCDHGA6 | protocadherin gamma subfamily A, 6                                           | NM_018919       | chr5_140753958-140753958_T_G  | 103L>R  | Substitution | Nonsynonymous coding | 30% |
| MM04T | PCDHGA7 | protocadherin gamma subfamily A, 7                                           | NM_018920       | chr5_140763408-140763408_C_A  | 314F>L  | Substitution | Nonsynonymous coding | 34% |
| MM04T | PCDHGA8 | protocadherin gamma subfamily A, 8                                           | CCDS47291.1     | chr5_140773387-140773387_C_T  | 336S>L  | Substitution | Nonsynonymous coding | 33% |
| MM04T | PCDHGA8 | protocadherin gamma subfamily A, 8                                           | CCDS47291.1     | chr5_140773459-140773459_C_T  | 360S>F  | Substitution | Nonsynonymous coding | 29% |
| MM04T | PCDHGA9 | protocadherin gamma subfamily A, 9                                           | NM_018921       | chr5_140783768-140783768_G_T  | 417E>X  | Substitution | Nonsense             | 26% |
| MM04T | PCDHGB1 | protocadherin gamma subfamily B, 1                                           | NM_018922       | chr5_140730684-140730684_G_A  | 286S>N  | Substitution | Nonsynonymous coding | 30% |
| MM04T | PCF11   | PCF11, cleavage and polyadenylation factor subunit, homolog (S. cerevisiae)  | CCDS44689.1     | chr11_82877688-82877688_G_T   | 583E>D  | Substitution | Nonsynonymous coding | 23% |
| MM04T | PCF11   | PCF11, cleavage and polyadenylation factor subunit, homolog (S. cerevisiae)  | CCDS44689.1     | chr11_82878277-82878277_G_A   | 643R>Q  | Substitution | Nonsynonymous coding | 38% |
| MM04T | PCGF6   | polycomb group ring finger 6                                                 | CCDS31275.1     | chr10_105073971-105073971_C_T | 323R>Q  | Substitution | Nonsynonymous coding | 46% |
| MM04T | PCID2   | PCI domain containing 2                                                      | CCDS9532.2      | chr13_113838710-113838710_T_C | 212Y>C  | Substitution | Nonsynonymous coding | 29% |
| MM04T | PCID2   | PCI domain containing 2                                                      | CCDS9532.2      | chr13_113854748-113854748_C_T | 40R>Q   | Substitution | Nonsynonymous coding | 25% |
| MM04T | PCK1    | phosphoenolpyruvate carboxykinase 1 (soluble)                                | CCDS13460.1     | chr20_56139310-56139310_G_T   | 349K>N  | Substitution | Nonsynonymous coding | 22% |
| MM04T | PCK2    | phosphoenolpyruvate carboxykinase 2 (mitochondrial)                          | CCDS9609.1      | chr14_24566148-24566148_G_A   | 26S>N   | Substitution | Nonsynonymous coding | 34% |
| MM04T | PCLO    | piccolo presynaptic cytomatrix protein                                       | CCDS47630.1     | chr7_82579090-82579090_C_T    | 3605R>Q | Substitution | Nonsynonymous coding | 32% |
| MM04T | PCLO    | piccolo presynaptic cytomatrix protein                                       | CCDS47630.1     | chr7_82580431-82580431_C_T    | 3158G>D | Substitution | Nonsynonymous coding | 23% |
| MM04T | PCLO    | piccolo presynaptic cytomatrix protein                                       | CCDS47630.1     | chr7_82581462-82581462_C_A    | 2936R>I | Substitution | Nonsynonymous coding | 28% |
| MM04T | PCLO    | piccolo presynaptic cytomatrix protein                                       | CCDS47630.1     | chr7_82583362-82583362_T_C    | 2303K>E | Substitution | Nonsynonymous coding | 29% |
| MM04T | PCLO    | piccolo presynaptic cytomatrix protein                                       | CCDS47630.1     | chr7_82585937-82585937_T_G    | 1444E>D | Substitution | Nonsynonymous coding | 29% |
| MM04T | PCLO    | piccolo presynaptic cytomatrix protein                                       | CCDS47630.1     | chr7_82763915-82763915_C_T    | 984G>D  | Substitution | Nonsynonymous coding | 28% |
| MM04T | PCLO    | piccolo presynaptic cytomatrix protein                                       | CCDS47630.1     | chr7_82764966-82764966_C_A    | 634E>X  | Substitution | Nonsense             | 21% |
| MM04T | PCM1    | pericentriolar material 1                                                    | CCDS47812.1     | chr8_17817827-17817827_G_T    | 732E>D  | Substitution | Nonsynonymous coding | 32% |
| MM04T | PCM1    | pericentriolar material 1                                                    | CCDS47812.1     | chr8_17867210-17867210_G_T    | 1706R>M | Substitution | Nonsynonymous coding | 30% |
| MM04T | PCMTD1  | protein-L-isoaspartate (D-aspartate) O-methyltransferase domain containing 1 | CCDS6148.1      | chr8_52733230-52733230_C_T    | 252R>Q  | Substitution | Nonsynonymous coding | 18% |
| MM04T | PCNT    | pericentrin                                                                  | CCDS33592.1     | chr21_47836119-47836119_C_A   | 2096S>Y | Substitution | Nonsynonymous coding | 21% |
| MM04T | PCNT    | pericentrin                                                                  | CCDS33592.1     | chr21_47819606-47819606_G_T   | 1563E>X | Substitution | Nonsense             | 24% |
| MM04T | PCNX    | pecanex homolog (Drosophila)                                                 | CCDS9806.1      | chr14_71576190-71576190_C_A   | 2256L>M | Substitution | Nonsynonymous coding | 31% |
| MM04T | PCNXL4  | pecanex-like 4 (Drosophila)                                                  | ENST00000404681 | chr14_60574744-60574744_C_A   | 130L>I  | Substitution | Nonsynonymous coding | 32% |
| MM04T | PCOLCE2 | procollagen C-endopeptidase enhancer 2                                       | CCDS3127.1      | chr3_142537266-142537266_G_A  | 387R>X  | Substitution | Nonsense             | 22% |
| MM04T | PCSK4   | proprotein convertase subtilisin/kexin type 4                                | CCDS12069.2     | chr19_1482903-1482903_A_G     | 563F>S  | Substitution | Nonsynonymous coding | 14% |
| MM04T | PCYOX1L | prenylcysteine oxidase 1 like                                                | CCDS4296.1      | chr5_148745538-148745538_C_A  | 168F>L  | Substitution | Nonsynonymous coding | 23% |

|       |         |                                                                    |                 |                               |         |              |                      |     |
|-------|---------|--------------------------------------------------------------------|-----------------|-------------------------------|---------|--------------|----------------------|-----|
| MM04T | PCYOX1L | prenylcysteine oxidase 1 like                                      | CCDS4296.1      | chr5_148746962-148746962_C_A  | 241S>Y  | Substitution | Nonsynonymous coding | 18% |
| MM04T | PDCD4   | programmed cell death 4 (neoplastic transformation inhibitor)      | CCDS7567.1      | chr10_112650336-112650336_G_A | 300V>M  | Substitution | Nonsynonymous coding | 24% |
| MM04T | PDCD4   | programmed cell death 4 (neoplastic transformation inhibitor)      | CCDS7567.1      | chr10_112654200-112654200_G_T | 377E>X  | Substitution | Nonsense             | 34% |
| MM04T | PDDC1   | Parkinson disease 7 domain containing 1                            | CCDS7713.1      | chr11_774059-774059_C_A       | 66D>Y   | Substitution | Nonsynonymous coding | 27% |
| MM04T | PDE11A  | phosphodiesterase 11A                                              | CCDS33334.1     | chr2_178545616-178545616_G_T  | 787F>L  | Substitution | Nonsynonymous coding | 17% |
| MM04T | PDE11A  | phosphodiesterase 11A                                              | CCDS33334.1     | chr2_178545555-178545555_G_A  | 808R>X  | Substitution | Nonsense             | 36% |
| MM04T | PDE1B   | phosphodiesterase 1B, calmodulin-dependent                         | CCDS8882.1      | chr12_54963341-54963341_G_T   | 141R>I  | Substitution | Nonsynonymous coding | 22% |
| MM04T | PDE1C   | phosphodiesterase 1C, calmodulin-dependent 70kDa                   | CCDS5437.1      | chr7_32091190-32091190_C_T    | 35R>K   | Substitution | Nonsynonymous coding | 11% |
| MM04T | PDE1C   | phosphodiesterase 1C, calmodulin-dependent 70kDa                   | CCDS5437.1      | chr7_31920454-31920454_G_A    | 50Q>X   | Substitution | Nonsense             | 21% |
| MM04T | PDE2A   | phosphodiesterase 2A, cGMP-stimulated                              | CCDS8216.1      | chr11_72297120-72297120_C_A   | 392E>D  | Substitution | Nonsynonymous coding | 19% |
| MM04T | PDE4A   | phosphodiesterase 4A, cAMP-specific                                | CCDS45961.1     | chr19_10578223-10578223_G_A   | 863A>T  | Substitution | Nonsynonymous coding | 22% |
| MM04T | PDE6C   | phosphodiesterase 6C, cGMP-specific, cone, alpha prime             | CCDS7429.1      | chr10_95418670-95418670_G_T   | 683M>I  | Substitution | Nonsynonymous coding | 26% |
| MM04T | PDE8B   | phosphodiesterase 8B                                               | CCDS4037.1      | chr5_76700580-76700580_G_T    | 416E>X  | Substitution | Nonsense             | 24% |
| MM04T | PDE9A   | phosphodiesterase 9A                                               | CCDS13690.1     | chr21_44171250-44171250_T     | NA      | Insertion    | Frameshift           | 17% |
| MM04T | PDE9A   | phosphodiesterase 9A                                               | CCDS13690.1     | chr21_44185538-44185538_A_C   | 430E>D  | Substitution | Nonsynonymous coding | 34% |
| MM04T | PDGFRB  | platelet-derived growth factor receptor, beta polypeptide          | CCDS4303.1      | chr5_149495372-149495372_G_A  | 1092S>L | Substitution | Nonsynonymous coding | 33% |
| MM04T | PDGFRL  | platelet-derived growth factor receptor-like                       | CCDS6003.1      | chr8_17447089-17447089_C_A    | 56D>E   | Substitution | Nonsynonymous coding | 34% |
| MM04T | PDGFRL  | platelet-derived growth factor receptor-like                       | CCDS6003.1      | chr8_17447147-17447147_C_T    | 76R>C   | Substitution | Nonsynonymous coding | 41% |
| MM04T | PDHA1   | pyruvate dehydrogenase (lipoamide) alpha 1                         | CCDS14192.1     | chrX_19369513-19369513_G_A    | 136A>T  | Substitution | Nonsynonymous coding | 27% |
| MM04T | PDHA1   | pyruvate dehydrogenase (lipoamide) alpha 1                         | CCDS14192.1     | chrX_19373832-19373832_G_A    | 263R>Q  | Substitution | Nonsynonymous coding | 23% |
| MM04T | PDIA3   | protein disulfide isomerase family A, member 3                     | CCDS10101.1     | chr15_44063379-44063379_A_C   | 494K>T  | Substitution | Nonsynonymous coding | 32% |
| MM04T | PDILT   | protein disulfide isomerase-like, testis expressed                 | CCDS10584.1     | chr16_20370649-20370649_C_A   | 583E>X  | Substitution | Nonsense             | 32% |
| MM04T | PDK4    | pyruvate dehydrogenase kinase, isozyme 4                           | CCDS5643.1      | chr7_95222231-95222231_G_A    | 124R>X  | Substitution | Nonsense             | 29% |
| MM04T | PDLIM5  | PDZ and LIM domain 5                                               | CCDS3641.1      | chr4_95444909-95444909_T_C    | 44V>A   | Substitution | Nonsynonymous coding | 19% |
| MM04T | PDPR    | pyruvate dehydrogenase phosphatase regulatory subunit              | CCDS45520.1     | chr16_70166086-70166086_C_T   | 294R>W  | Substitution | Nonsynonymous coding | 19% |
| MM04T | PDS5A   | PDS5, regulator of cohesion maintenance, homolog A (S. cerevisiae) | CCDS47045.1     | chr4_39850493-39850493_T_G    | 1106K>T | Substitution | Nonsynonymous coding | 32% |
| MM04T | PDS51   | prenyl (decaprenyl) diphosphate synthase, subunit 1                | CCDS31168.1     | chr10_27012996-27012996_T_G   | 259Y>D  | Substitution | Nonsynonymous coding | 28% |
| MM04T | PDZD2   | PDZ domain containing 2                                            | CCDS34137.1     | chr5_32087876-32087876_C_A    | 1441S>Y | Substitution | Nonsynonymous coding | 25% |
| MM04T | PDZD2   | PDZ domain containing 2                                            | CCDS34137.1     | chr5_32090553-32090553_C_A    | 2333F>L | Substitution | Nonsynonymous coding | 21% |
| MM04T | PDZD7   | PDZ domain containing 7                                            | ENST00000238965 | chr10_102770123-102770123_C_A | 202E>D  | Substitution | Nonsynonymous coding | 23% |
| MM04T | PDZD8   | PDZ domain containing 8                                            | CCDS7600.1      | chr10_119049846-119049846_T_G | 371K>T  | Substitution | Nonsynonymous coding | 22% |
| MM04T | PDZK1   | PDZ domain containing 1                                            | CCDS924.1       | chr1_145747242-145747242_G_T  | 67E>X   | Substitution | Nonsense             | 50% |

|       |         |                                                       |                 |                              |        |              |                      |     |
|-------|---------|-------------------------------------------------------|-----------------|------------------------------|--------|--------------|----------------------|-----|
| MM04T | PDZRN4  | PDZ domain containing ring finger 4                   | CCDS8739.1      | chr12_41900312-41900312_C_T  | 42R>C  | Substitution | Nonsynonymous coding | 26% |
| MM04T | PDZRN4  | PDZ domain containing ring finger 4                   | CCDS8739.1      | chr12_41966493-41966493_C_T  | 380R>X | Substitution | Nonsense             | 31% |
| MM04T | PEAR1   | platelet endothelial aggregation receptor 1           | CCDS30892.1     | chr1_156876621-156876621_G_A | 198C>Y | Substitution | Nonsynonymous coding | 29% |
| MM04T | PEAR1   | platelet endothelial aggregation receptor 1           | CCDS30892.1     | chr1_156877492-156877492_G_T | 245Q>H | Substitution | Nonsynonymous coding | 22% |
| MM04T | PEG3    | paternally expressed 3                                | CCDS33123.1     | chr19_57286489-57286489_G_A  | 384S>F | Substitution | Nonsynonymous coding | 28% |
| MM04T | PEG3    | paternally expressed 3                                | CCDS33123.1     | chr19_57286654-57286654_C_A  | 329R>I | Substitution | Nonsynonymous coding | 22% |
| MM04T | PEG3    | paternally expressed 3                                | CCDS12948.1     | chr19_57327687-57327687_G_T  | 708S>Y | Substitution | Nonsynonymous coding | 33% |
| MM04T | PEG3    | paternally expressed 3                                | CCDS12948.1     | chr19_57329140-57329140_C_A  | 279R>I | Substitution | Nonsynonymous coding | 24% |
| MM04T | PEG3    | paternally expressed 3                                | CCDS12948.1     | chr19_57327880-57327880_C_A  | 644E>X | Substitution | Nonsense             | 20% |
| MM04T | PENK    | proenkephalin                                         | CCDS6168.1      | chr8_57354237-57354237_G_A   | 133A>V | Substitution | Nonsynonymous coding | 23% |
| MM04T | PER2    | period circadian clock 2                              | CCDS2528.1      | chr2_239174207-239174207_C_A | 331R>I | Substitution | Nonsynonymous coding | 29% |
| MM04T | PEX1    | peroxisomal biogenesis factor 1                       | CCDS5627.1      | chr7_92140328-92140328_G_T   | 506S>Y | Substitution | Nonsynonymous coding | 15% |
| MM04T | PEX5L   | peroxisomal biogenesis factor 5-like                  | CCDS3236.1      | chr3_179593209-179593209_T_A | 188T>S | Substitution | Nonsynonymous coding | 19% |
| MM04T | PFKFB1  | 6-phosphofructo-2-kinase/fructose-2,6-biphosphatase 1 | CCDS14364.1     | chrX_54971885-54971885_T_C   | 362Y>C | Substitution | Nonsynonymous coding | 20% |
| MM04T | PFKFB1  | 6-phosphofructo-2-kinase/fructose-2,6-biphosphatase 1 | CCDS14364.1     | chrX_54978349-54978349_G_A   | 279R>C | Substitution | Nonsynonymous coding | 17% |
| MM04T | PFKFB3  | 6-phosphofructo-2-kinase/fructose-2,6-biphosphatase 3 | CCDS7078.1      | chr10_6259110-6259110_G_A    | 152E>K | Substitution | Nonsynonymous coding | 20% |
| MM04T | PFKP    | phosphofructokinase, platelet                         | CCDS7059.1      | chr10_3178716-3178716_G_T    | 767S>I | Substitution | Nonsynonymous coding | 20% |
| MM04T | PFN2    | profilin 2                                            | CCDS46934.1     | chr3_149683989-149683989_C_T | 130E>K | Substitution | Nonsynonymous coding | 34% |
| MM04T | PFN3    | profilin 3                                            | CCDS34301.1     | chr5_176827199-176827199_C_T | 127E>K | Substitution | Nonsynonymous coding | 20% |
| MM04T | PGBD1   | piggyBac transposable element derived 1               | CCDS4648.1      | chr6_28268861-28268861_G_T   | 410L>F | Substitution | Nonsynonymous coding | 33% |
| MM04T | PGBD1   | piggyBac transposable element derived 1               | CCDS4648.1      | chr6_28269108-28269108_A_C   | 493I>L | Substitution | Nonsynonymous coding | 38% |
| MM04T | PGBD1   | piggyBac transposable element derived 1               | CCDS4648.1      | chr6_28269498-28269498_C_A   | 623H>N | Substitution | Nonsynonymous coding | 30% |
| MM04T | PGBD1   | piggyBac transposable element derived 1               | CCDS4648.1      | chr6_28269661-28269661_G_A   | 677R>Q | Substitution | Nonsynonymous coding | 35% |
| MM04T | PGBD1   | piggyBac transposable element derived 1               | CCDS4648.1      | chr6_28269396-28269396_G_T   | 589E>X | Substitution | Nonsense             | 36% |
| MM04T | PGBD2   | piggyBac transposable element derived 2               | CCDS31128.1     | chr1_249211486-249211486_G_A | 235E>K | Substitution | Nonsynonymous coding | 38% |
| MM04T | PGBD4   | piggyBac transposable element derived 4               | CCDS10033.1     | chr15_34394857-34394857_C_T  | 42S>L  | Substitution | Nonsynonymous coding | 27% |
| MM04T | PGBD4   | piggyBac transposable element derived 4               | CCDS10033.1     | chr15_34395812-34395812_G_T  | 360Q>H | Substitution | Nonsynonymous coding | 40% |
| MM04T | PGF     | placental growth factor                               | CCDS9835.1      | chr14_75413091-75413091_T_G  | 138K>T | Substitution | Nonsynonymous coding | 30% |
| MM04T | PGK1    | phosphoglycerate kinase 1                             | CCDS14438.1     | chrX_77372837-77372837_C_A   | 149A>D | Substitution | Nonsynonymous coding | 29% |
| MM04T | PGLYRP2 | peptidoglycan recognition protein 2                   | ENST00000292609 | chr19_15580316-15580316_G_A  | 590R>W | Substitution | Nonsynonymous coding | 21% |
| MM04T | PGM1    | phosphoglucomutase 1                                  | CCDS625.1       | chr1_64117392-64117392_T_G   | 445L>V | Substitution | Nonsynonymous coding | 41% |
| MM04T | PGPEP1L | pyroglutamyl-peptidase I-like                         | NM_001102612    | chr15_99511748-99511748_C_T  | 184E>K | Substitution | Nonsynonymous coding | 12% |

|       |         |                                                                           |              |                               |         |              |                      |     |
|-------|---------|---------------------------------------------------------------------------|--------------|-------------------------------|---------|--------------|----------------------|-----|
| MM04T | PGPEP1L | pyroglutamyl-peptidase I-like                                             | NM_001102612 | chr15_99511874-99511874_C_T   | 142A>T  | Substitution | Nonsynonymous coding | 17% |
| MM04T | PGR     | progesterone receptor                                                     | CCDS8310.1   | chr11_100922293-100922293_C_T | 740R>Q  | Substitution | Nonsynonymous coding | 42% |
| MM04T | PHACTR1 | phosphatase and actin regulator 1                                         | NM_030948    | chr6_13053737-13053737_G_A    | 131E>K  | Substitution | Nonsynonymous coding | 29% |
| MM04T | PHACTR3 | phosphatase and actin regulator 3                                         | CCDS13480.1  | chr20_58415459-58415459_G_T   | 474E>X  | Substitution | Nonsense             | 20% |
| MM04T | PHEX    | phosphate regulating endopeptidase homolog, X-linked                      | CCDS14204.1  | chrX_22094544-22094544_G_A    | 130E>K  | Substitution | Nonsynonymous coding | 27% |
| MM04T | PHF12   | PHD finger protein 12                                                     | CCDS32598.1  | chr17_27233328-27233328_C_A   | 963S>I  | Substitution | Nonsynonymous coding | 28% |
| MM04T | PHF16   | PHD finger protein 16                                                     | CCDS14271.1  | chrX_46918360-46918360_G_A    | 785E>K  | Substitution | Nonsynonymous coding | 26% |
| MM04T | PHF17   | PHD finger protein 17                                                     | CCDS34062.1  | chr4_129770271-129770271_G_T  | 145D>Y  | Substitution | Nonsynonymous coding | 31% |
| MM04T | PHF17   | PHD finger protein 17                                                     | CCDS34062.1  | chr4_129792876-129792876_G_A  | 663R>H  | Substitution | Nonsynonymous coding | 36% |
| MM04T | PHF3    | PHD finger protein 3                                                      | CCDS4966.1   | chr6_64423604-64423604_A_C    | 2040*>Y | Substitution | Nonsynonymous coding | 34% |
| MM04T | PHF7    | PHD finger protein 7                                                      | CCDS2854.1   | chr3_52455015-52455015_G_T    | 170Q>H  | Substitution | Nonsynonymous coding | 19% |
| MM04T | PHIP    | pleckstrin homology domain interacting protein                            | CCDS4987.1   | chr6_79655843-79655843_G_T    | 1502S>Y | Substitution | Nonsynonymous coding | 37% |
| MM04T | PHKA1   | phosphorylase kinase, alpha 1 (muscle)                                    | CCDS14421.1  | chrX_71825186-71825186_C_T    | 917R>Q  | Substitution | Nonsynonymous coding | 31% |
| MM04T | PHKA1   | phosphorylase kinase, alpha 1 (muscle)                                    | CCDS14421.1  | chrX_71838672-71838672_G_T    | 753L>I  | Substitution | Nonsynonymous coding | 24% |
| MM04T | PHKA1   | phosphorylase kinase, alpha 1 (muscle)                                    | CCDS14421.1  | chrX_71870254-71870254_T_C    | 437D>G  | Substitution | Nonsynonymous coding | 20% |
| MM04T | PHKA1   | phosphorylase kinase, alpha 1 (muscle)                                    | CCDS14421.1  | chrX_71825181-71825181_G_A    | 919R>X  | Substitution | Nonsense             | 27% |
| MM04T | PHKA2   | phosphorylase kinase, alpha 2 (liver)                                     | CCDS14190.1  | chrX_18936961-18936961_C_T    | 659E>K  | Substitution | Nonsynonymous coding | 29% |
| MM04T | PHKA2   | phosphorylase kinase, alpha 2 (liver)                                     | CCDS14190.1  | chrX_18943856-18943856_C_T    | 500R>Q  | Substitution | Nonsynonymous coding | 15% |
| MM04T | PHKA2   | phosphorylase kinase, alpha 2 (liver)                                     | CCDS14190.1  | chrX_18958138-18958138_C_T    | 298R>Q  | Substitution | Nonsynonymous coding | 17% |
| MM04T | PHKA2   | phosphorylase kinase, alpha 2 (liver)                                     | CCDS14190.1  | chrX_18924728-18924728_G_T    | 897Y>X  | Substitution | Nonsense             | 26% |
| MM04T | PHLDB2  | pleckstrin homology-like domain, family B, member 2                       | CCDS46886.1  | chr3_111688708-111688708_C_T  | 1163R>C | Substitution | Nonsynonymous coding | 27% |
| MM04T | PHLPP2  | PH domain and leucine rich repeat protein phosphatase 2                   | CCDS32479.1  | chr16_71683148-71683148_C_T   | 1206R>Q | Substitution | Nonsynonymous coding | 25% |
| MM04T | PHTF1   | putative homeodomain transcription factor 1                               | CCDS861.1    | chr1_114243561-114243561_C_T  | 634G>E  | Substitution | Nonsynonymous coding | 38% |
| MM04T | PI4KA   | phosphatidylinositol 4-kinase, catalytic, alpha                           | CCDS33603.1  | chr22_21107187-21107187_T_G   | NA      | Substitution | Splice site donor    | 31% |
| MM04T | PI4KB   | phosphatidylinositol 4-kinase, catalytic, beta                            | CCDS993.1    | chr1_151278752-151278752_G_A  | 436R>W  | Substitution | Nonsynonymous coding | 29% |
| MM04T | PIAS2   | protein inhibitor of activated STAT, 2                                    | CCDS32824.1  | chr18_44470595-44470595_T_A   | 149K>N  | Substitution | Nonsynonymous coding | 25% |
| MM04T | PIEZO2  | piezo-type mechanosensitive ion channel component 2                       | NM_022068    | chr18_10758077-10758077_C_A   | 1246E>D | Substitution | Nonsynonymous coding | 16% |
| MM04T | PIFO    | primary cilia formation                                                   | CCDS833.1    | chr1_111891171-111891171_G_T  | 98V>L   | Substitution | Nonsynonymous coding | 19% |
| MM04T | PIGK    | phosphatidylinositol glycan anchor biosynthesis, class K                  | CCDS674.1    | chr1_77627340-77627340_C_T    | 214R>Q  | Substitution | Nonsynonymous coding | 30% |
| MM04T | PIGO    | phosphatidylinositol glycan anchor biosynthesis, class O                  | CCDS6575.1   | chr9_35091479-35091479_C_T    | 802R>Q  | Substitution | Nonsynonymous coding | 34% |
| MM04T | PIGX    | phosphatidylinositol glycan anchor biosynthesis, class X                  | CCDS3320.1   | chr3_196449285-196449285_G_T  | NA      | Substitution | Splice site acceptor | 23% |
| MM04T | PIK3C2A | phosphatidylinositol-4-phosphate 3-kinase, catalytic subunit type 2 alpha | CCDS7824.1   | chr11_17158085-17158085_C_A   | 598E>X  | Substitution | Nonsense             | 21% |

|       |         |                                                                                       |                 |                               |         |              |                      |     |
|-------|---------|---------------------------------------------------------------------------------------|-----------------|-------------------------------|---------|--------------|----------------------|-----|
| MM04T | PIK3C2B | phosphatidylinositol-4-phosphate 3-kinase, catalytic subunit type 2 beta              | CCDS1446.1      | chr1_204411723-204411723_G_T  | 1029F>L | Substitution | Nonsynonymous coding | 12% |
| MM04T | PIK3C2B | phosphatidylinositol-4-phosphate 3-kinase, catalytic subunit type 2 beta              | ENST00000438854 | chr1_204436071-204436071_C_T  | 32R>H   | Substitution | Nonsynonymous coding | 25% |
| MM04T | PIK3CA  | phosphatidylinositol-4,5-bisphosphate 3-kinase, catalytic subunit alpha               | CCDS43171.1     | chr3_178916876-178916876_G_A  | 88R>Q   | Substitution | Nonsynonymous coding | 32% |
| MM04T | PIK3CA  | phosphatidylinositol-4,5-bisphosphate 3-kinase, catalytic subunit alpha               | CCDS43171.1     | chr3_178922301-178922301_G_A  | 357R>Q  | Substitution | Nonsynonymous coding | 32% |
| MM04T | PIK3CD  | phosphatidylinositol-4,5-bisphosphate 3-kinase, catalytic subunit delta               | CCDS104.1       | chr1_9778918-9778918_C_T      | 396A>V  | Substitution | Nonsynonymous coding | 13% |
| MM04T | PIK3CG  | phosphatidylinositol-4,5-bisphosphate 3-kinase, catalytic subunit gamma               | CCDS5739.1      | chr7_106509747-106509747_G_A  | 581E>K  | Substitution | Nonsynonymous coding | 27% |
| MM04T | PIK3CG  | phosphatidylinositol-4,5-bisphosphate 3-kinase, catalytic subunit gamma               | CCDS5739.1      | chr7_106515198-106515198_G_A  | 781E>K  | Substitution | Nonsynonymous coding | 16% |
| MM04T | PIK3CG  | phosphatidylinositol-4,5-bisphosphate 3-kinase, catalytic subunit gamma               | CCDS5739.1      | chr7_106523554-106523554_T_G  | 902F>L  | Substitution | Nonsynonymous coding | 29% |
| MM04T | PIKFYVE | phosphoinositide kinase, FYVE finger containing                                       | CCDS2382.1      | chr2_209141530-209141530_G_T  | 139K>N  | Substitution | Nonsynonymous coding | 28% |
| MM04T | PIKFYVE | phosphoinositide kinase, FYVE finger containing                                       | CCDS2382.1      | chr2_209215599-209215599_C_A  | 1847R>S | Substitution | Nonsynonymous coding | 30% |
| MM04T | PIKFYVE | phosphoinositide kinase, FYVE finger containing                                       | CCDS2382.1      | chr2_209218628-209218628_G_T  | 1951D>Y | Substitution | Nonsynonymous coding | 24% |
| MM04T | PIP5K1A | phosphatidylinositol-4-phosphate 5-kinase, type I, alpha                              | CCDS44219.1     | chr1_151196848-151196848_T_C  | 41V>A   | Substitution | Nonsynonymous coding | 27% |
| MM04T | PITPNM2 | phosphatidylinositol transfer protein, membrane-associated 2                          | CCDS9242.1      | chr12_123488954-123488954_G_T | 345F>L  | Substitution | Nonsynonymous coding | 28% |
| MM04T | PIWIL1  | piwi-like 1 (Drosophila)                                                              | CCDS9268.1      | chr12_130839140-130839140_G_T | 368R>I  | Substitution | Nonsynonymous coding | 17% |
| MM04T | PIWIL2  | piwi-like 2 (Drosophila)                                                              | CCDS6029.1      | chr8_22138920-22138920_C_T    | 106A>V  | Substitution | Nonsynonymous coding | 31% |
| MM04T | PIWIL2  | piwi-like 2 (Drosophila)                                                              | CCDS6029.1      | chr8_22168710-22168710_C_T    | 629A>V  | Substitution | Nonsynonymous coding | 33% |
| MM04T | PIWIL3  | piwi-like 3 (Drosophila)                                                              | CCDS33623.1     | chr22_25131750-25131750_C_A   | 520R>I  | Substitution | Nonsynonymous coding | 27% |
| MM04T | PIWIL3  | piwi-like 3 (Drosophila)                                                              | CCDS33623.1     | chr22_25145740-25145740_C_A   | 379S>I  | Substitution | Nonsynonymous coding | 23% |
| MM04T | PIWIL3  | piwi-like 3 (Drosophila)                                                              | CCDS33623.1     | chr22_25123969-25123969_G_A   | 662R>X  | Substitution | Nonsense             | 38% |
| MM04T | PIWIL4  | piwi-like 4 (Drosophila)                                                              | CCDS31656.1     | chr11_94335100-94335100_G_T   | 507R>I  | Substitution | Nonsynonymous coding | 26% |
| MM04T | PJA1    | praja ring finger 1, E3 ubiquitin protein ligase                                      | CCDS14393.1     | chrX_68381320-68381320_C_T    | 588A>T  | Substitution | Nonsynonymous coding | 30% |
| MM04T | PKD1L1  | polycystic kidney disease 1 like 1                                                    | CCDS34633.1     | chr7_47835708-47835708_G_T    | 2745S>Y | Substitution | Nonsynonymous coding | 23% |
| MM04T | PKD1L1  | polycystic kidney disease 1 like 1                                                    | CCDS34633.1     | chr7_47886498-47886498_G_A    | 1711S>F | Substitution | Nonsynonymous coding | 23% |
| MM04T | PKD1L2  | polycystic kidney disease 1-like 2                                                    | CCDS42202.1     | chr16_81204660-81204660_C_T   | 933G>E  | Substitution | Nonsynonymous coding | 18% |
| MM04T | PKD1L3  | polycystic kidney disease 1-like 3                                                    | ENST00000335106 | chr16_71971315-71971315_G_T   | 1442F>L | Substitution | Nonsynonymous coding | 34% |
| MM04T | PKD2    | polycystic kidney disease 2 (autosomal dominant)                                      | CCDS3627.1      | chr4_88959641-88959641_G_A    | 361R>Q  | Substitution | Nonsynonymous coding | 27% |
| MM04T | PKDREJ  | polycystic kidney disease (polycystin) and REJ homolog (sperm receptor for egg jelly) | CCDS14073.1     | chr22_46653425-46653425_G_A   | 1932S>L | Substitution | Nonsynonymous coding | 33% |
| MM04T | PKHD1   | polycystic kidney and hepatic disease 1 (autosomal recessive)                         | CCDS4935.1      | chr6_51640627-51640627_G_T    | 2845H>N | Substitution | Nonsynonymous coding | 33% |
| MM04T | PKHD1   | polycystic kidney and hepatic disease 1 (autosomal recessive)                         | CCDS4935.1      | chr6_51750747-51750747_T_G    | 2378K>T | Substitution | Nonsynonymous coding | 30% |
| MM04T | PKHD1   | polycystic kidney and hepatic disease 1 (autosomal recessive)                         | CCDS4935.1      | chr6_51897852-51897852_T_A    | 1114S>C | Substitution | Nonsynonymous coding | 34% |
| MM04T | PKHD1   | polycystic kidney and hepatic disease 1 (autosomal recessive)                         | CCDS4935.1      | chr6_51913401-51913401_C_A    | 766G>X  | Substitution | Nonsense             | 31% |
| MM04T | PKNOX2  | PBX/knotted 1 homeobox 2                                                              | CCDS41730.1     | chr11_125299990-125299990_C_T | 382A>V  | Substitution | Nonsynonymous coding | 33% |



|       |           |                                                                                            |             |                               |         |              |                      |     |
|-------|-----------|--------------------------------------------------------------------------------------------|-------------|-------------------------------|---------|--------------|----------------------|-----|
| MM04T | PKP2      | plakophilin 2                                                                              | CCDS8731.1  | chr12_32945618-32945618_G_T   | 846S>Y  | Substitution | Nonsynonymous coding | 20% |
| MM04T | PKP3      | plakophilin 3                                                                              | CCDS7695.1  | chr11_400543-400543_G_T       | 525E>D  | Substitution | Nonsynonymous coding | 25% |
| MM04T | PKP4      | plakophilin 4                                                                              | CCDS33305.1 | chr2_159523057-159523057_C_T  | 904R>C  | Substitution | Nonsynonymous coding | 24% |
| MM04T | PLA2G4F   | phospholipase A2, group IVF                                                                | CCDS32204.1 | chr15_42446648-42446648_C_A   | 65A>S   | Substitution | Nonsynonymous coding | 12% |
| MM04T | PLAUR     | plasminogen activator, urokinase receptor                                                  | CCDS12628.1 | chr19_44160711-44160711_C_T   | 131R>Q  | Substitution | Nonsynonymous coding | 26% |
| MM04T | PLCB1     | phospholipase C, beta 1 (phosphoinositide-specific)                                        | CCDS13102.1 | chr20_8609067-8609067_G_T     | 125E>X  | Substitution | Nonsense             | 34% |
| MM04T | PLCE1     | phospholipase C, epsilon 1                                                                 | CCDS41552.1 | chr10_95791870-95791870_T_A   | 356I>N  | Substitution | Nonsynonymous coding | 20% |
| MM04T | PLCE1     | phospholipase C, epsilon 1                                                                 | CCDS41552.1 | chr10_95993845-95993845_G_A   | 664D>N  | Substitution | Nonsynonymous coding | 31% |
| MM04T | PLCG2     | phospholipase C, gamma 2 (phosphatidylinositol-specific)                                   | CCDS42204.1 | chr16_81888120-81888120_C_T   | 89R>C   | Substitution | Nonsynonymous coding | 23% |
| MM04T | PLCG2     | phospholipase C, gamma 2 (phosphatidylinositol-specific)                                   | CCDS42204.1 | chr16_81953246-81953246_G_A   | 738E>K  | Substitution | Nonsynonymous coding | 21% |
| MM04T | PLCH1     | phospholipase C, eta 1                                                                     | CCDS46939.1 | chr3_155203396-155203396_C_A  | 916R>I  | Substitution | Nonsynonymous coding | 37% |
| MM04T | PLCL1     | phospholipase C-like 1                                                                     | CCDS2326.1  | chr2_198949838-198949838_T_A  | 435L>I  | Substitution | Nonsynonymous coding | 29% |
| MM04T | PLCL1     | phospholipase C-like 1                                                                     | CCDS2326.1  | chr2_198949867-198949867_G_T  | 444K>N  | Substitution | Nonsynonymous coding | 30% |
| MM04T | PLCL1     | phospholipase C-like 1                                                                     | CCDS2326.1  | chr2_198968608-198968608_G_T  | 920R>I  | Substitution | Nonsynonymous coding | 16% |
| MM04T | PLCL2     | phospholipase C-like 2                                                                     | CCDS33713.1 | chr3_17052053-17052053_C_A    | 279F>L  | Substitution | Nonsynonymous coding | 32% |
| MM04T | PLCZ1     | phospholipase C, zeta 1                                                                    | CCDS8680.1  | chr12_18876418-18876418_C_T   | 65R>Q   | Substitution | Nonsynonymous coding | 39% |
| MM04T | PLD1      | phospholipase D1, phosphatidylcholine-specific                                             | CCDS3216.1  | chr3_171330172-171330172_T_G  | 927M>L  | Substitution | Nonsynonymous coding | 26% |
| MM04T | PLD1      | phospholipase D1, phosphatidylcholine-specific                                             | CCDS3216.1  | chr3_171405244-171405244_A_G  | 557F>S  | Substitution | Nonsynonymous coding | 20% |
| MM04T | PLEC      | plectin                                                                                    | CCDS43772.1 | chr8_144993091-144993091_C_T  | 3770R>H | Substitution | Nonsynonymous coding | 20% |
| MM04T | PLEKHA1   | pleckstrin homology domain containing, family A (phosphoinositide binding specific) member | CCDS7629.1  | chr10_124152787-124152787_A_C | 24K>T   | Substitution | Nonsynonymous coding | 15% |
| MM04T | PLEKHA6   | pleckstrin homology domain containing, family A member 6                                   | CCDS1444.1  | chr1_204228847-204228847_C_A  | 182E>D  | Substitution | Nonsynonymous coding | 18% |
| MM04T | PLEKHA8P1 | pleckstrin homology domain containing, family A member 8 pseudogene 1                      | CCDS8747.1  | chr12_45567149-45567149_G_A   | 334R>X  | Substitution | Nonsense             | 31% |
| MM04T | PLEKHG1   | pleckstrin homology domain containing, family G (with RhoGef domain) member 1              | CCDS34552.1 | chr6_151139352-151139352_C_T  | 438H>Y  | Substitution | Nonsynonymous coding | 35% |
| MM04T | PLEKHG1   | pleckstrin homology domain containing, family G (with RhoGef domain) member 1              | CCDS34552.1 | chr6_151151900-151151900_G_T  | 551E>D  | Substitution | Nonsynonymous coding | 23% |
| MM04T | PLEKHG4   | pleckstrin homology domain containing, family G (with RhoGef domain) member 4              | CCDS32466.1 | chr16_67315972-67315972_G_A   | 356E>K  | Substitution | Nonsynonymous coding | 32% |
| MM04T | PLEKHG5   | pleckstrin homology domain containing, family G (with RhoGef domain) member 5              | CCDS41240.1 | chr1_6530630-6530630_G_A      | 616A>V  | Substitution | Nonsynonymous coding | 36% |
| MM04T | PLEKHH1   | pleckstrin homology domain containing, family H (with MyTH4 domain) member 1               | CCDS45128.1 | chr14_68029207-68029207_G_A   | 287V>I  | Substitution | Nonsynonymous coding | 21% |
| MM04T | PLEKHH2   | pleckstrin homology domain containing, family H (with MyTH4 domain) member 2               | CCDS1812.1  | chr2_43953473-43953473_T_G    | 868D>E  | Substitution | Nonsynonymous coding | 23% |
| MM04T | PLEKHH2   | pleckstrin homology domain containing, family H (with MyTH4 domain) member 2               | CCDS1812.1  | chr2_43980760-43980760_T_G    | 1219L>R | Substitution | Nonsynonymous coding | 46% |
| MM04T | PLG       | plasminogen                                                                                | CCDS5279.1  | chr6_161139332-161139332_C_A  | 265P>H  | Substitution | Nonsynonymous coding | 32% |
| MM04T | PLK3      | polo-like kinase 3                                                                         | CCDS515.1   | chr1_45266820-45266820_G_A    | 144R>Q  | Substitution | Nonsynonymous coding | 20% |
| MM04T | PLK3      | polo-like kinase 3                                                                         | CCDS515.1   | chr1_45267520-45267520_A_T    | 190N>I  | Substitution | Nonsynonymous coding | 22% |

|       |        |                                                          |                 |                              |         |              |                      |     |
|-------|--------|----------------------------------------------------------|-----------------|------------------------------|---------|--------------|----------------------|-----|
| MM04T | PLOD2  | procollagen-lysine, 2-oxoglutarate 5-dioxygenase 2       | CCDS3132.1      | chr3_145824381-145824381_G_T | 185L>I  | Substitution | Nonsynonymous coding | 28% |
| MM04T | PLOD2  | procollagen-lysine, 2-oxoglutarate 5-dioxygenase 2       | CCDS3132.1      | chr3_145841984-145841984_C_A | 48E>X   | Substitution | Nonsense             | 26% |
| MM04T | PLOD3  | procollagen-lysine, 2-oxoglutarate 5-dioxygenase 3       | CCDS5715.1      | chr7_100850158-100850158_G_A | 655R>C  | Substitution | Nonsynonymous coding | 25% |
| MM04T | PLRG1  | pleiotropic regulator 1                                  | CCDS34083.1     | chr4_155457844-155457844_C_A | 513R>I  | Substitution | Nonsynonymous coding | 18% |
| MM04T | PLRG1  | pleiotropic regulator 1                                  | CCDS34083.1     | chr4_155458497-155458497_G_A | 476R>X  | Substitution | Nonsense             | 44% |
| MM04T | PLSCR2 | phospholipid scramblase 2                                | CCDS3134.1      | chr3_146173150-146173150_C_T | 66R>Q   | Substitution | Nonsynonymous coding | 28% |
| MM04T | PLSCR5 | phospholipid scramblase family, member 5                 | CCDS46931.1     | chr3_146303888-146303888_G_T | 263F>L  | Substitution | Nonsynonymous coding | 44% |
| MM04T | PLVAP  | plasmalemma vesicle associated protein                   | CCDS32952.1     | chr19_17476402-17476402_C_T  | 291R>Q  | Substitution | Nonsynonymous coding | 37% |
| MM04T | PLXDC2 | plexin domain containing 2                               | CCDS7132.1      | chr10_20436835-20436835_A_C  | NA      | Substitution | Splice site donor    | 25% |
| MM04T | PLXDC2 | plexin domain containing 2                               | CCDS7132.1      | chr10_20335828-20335828_C_T  | 119R>X  | Substitution | Nonsense             | 29% |
| MM04T | PLXNA1 | plexin A1                                                | CCDS33847.1     | chr3_126735843-126735843_G_A | 1057R>Q | Substitution | Nonsynonymous coding | 30% |
| MM04T | PLXNA1 | plexin A1                                                | CCDS33847.1     | chr3_126737291-126737291_G_A | 1249R>Q | Substitution | Nonsynonymous coding | 22% |
| MM04T | PLXNA2 | plexin A2                                                | CCDS31013.1     | chr1_208276539-208276539_G_T | 520C>X  | Substitution | Nonsense             | 30% |
| MM04T | PLXNA3 | plexin A3                                                | CCDS14752.1     | chrX_153697505-153697505_T_C | 1514V>A | Substitution | Nonsynonymous coding | 28% |
| MM04T | PLXNA4 | plexin A4                                                | CCDS43646.1     | chr7_131815337-131815337_C_T | NA      | Substitution | Splice site acceptor | 33% |
| MM04T | PLXNB3 | plexin B3                                                | CCDS14729.1     | chrX_153041609-153041609_G_A | 1557D>N | Substitution | Nonsynonymous coding | 36% |
| MM04T | PLXNB3 | plexin B3                                                | CCDS14729.1     | chrX_153044439-153044439_C_T | 1892A>V | Substitution | Nonsynonymous coding | 39% |
| MM04T | PLXNC1 | plexin C1                                                | CCDS9049.1      | chr12_94658989-94658989_A_C  | 1195E>D | Substitution | Nonsynonymous coding | 22% |
| MM04T | PLXND1 | plexin D1                                                | CCDS33854.1     | chr3_129279561-129279561_C_A | 1667D>Y | Substitution | Nonsynonymous coding | 28% |
| MM04T | PMEL   | premelanosome protein                                    | CCDS8897.1      | chr12_56351351-56351351_C_A  | 246D>Y  | Substitution | Nonsynonymous coding | 24% |
| MM04T | PMPCB  | peptidase (mitochondrial processing) beta                | CCDS5730.1      | chr7_102939929-102939929_G_T | 94E>X   | Substitution | Nonsense             | 31% |
| MM04T | PMS1   | PMS1 postmeiotic segregation increased 1 (S. cerevisiae) | ENST00000409985 | chr2_190670540-190670540__AA | NA      | Insertion    | Frameshift           | 11% |
| MM04T | PMS1   | PMS1 postmeiotic segregation increased 1 (S. cerevisiae) | CCDS2302.1      | chr2_190660497-190660497_G_T | 45E>D   | Substitution | Nonsynonymous coding | 25% |
| MM04T | PNISR  | PNN-interacting serine/arginine-rich protein             | CCDS5043.1      | chr6_99849452-99849452_T_G   | 461K>T  | Substitution | Nonsynonymous coding | 32% |
| MM04T | PNMA5  | paraneoplastic Ma antigen family member 5                | CCDS14718.1     | chrX_152159655-152159655_G_A | 163S>L  | Substitution | Nonsynonymous coding | 35% |
| MM04T | PNPLA4 | patatin-like phospholipase domain containing 4           | CCDS14129.1     | chrX_7890090-7890090_G_T     | 77S>Y   | Substitution | Nonsynonymous coding | 33% |
| MM04T | PNPLA6 | patatin-like phospholipase domain containing 6           | CCDS32891.1     | chr19_7626154-7626154_A_G    | 1287D>G | Substitution | Nonsynonymous coding | 35% |
| MM04T | PNPLA8 | patatin-like phospholipase domain containing 8           | CCDS34733.1     | chr7_108119814-108119814_A_C | 630L>V  | Substitution | Nonsynonymous coding | 36% |
| MM04T | PNRC1  | proline-rich nuclear receptor coactivator 1              | CCDS5018.1      | chr6_89793662-89793662_G_T   | 244R>I  | Substitution | Nonsynonymous coding | 34% |
| MM04T | PODXL  | podocalyxin-like                                         | CCDS34755.1     | chr7_131191465-131191465_C_A | 374E>D  | Substitution | Nonsynonymous coding | 37% |
| MM04T | POF1B  | premature ovarian failure, 1B                            | CCDS14452.1     | chrX_84559349-84559349_C_A   | 522E>D  | Substitution | Nonsynonymous coding | 16% |
| MM04T | POF1B  | premature ovarian failure, 1B                            | CCDS14452.1     | chrX_84560831-84560831_C_A   | 468R>I  | Substitution | Nonsynonymous coding | 30% |

|       |             |                                                          |                 |                               |         |              |                      |     |
|-------|-------------|----------------------------------------------------------|-----------------|-------------------------------|---------|--------------|----------------------|-----|
| MM04T | POF1B       | premature ovarian failure, 1B                            | CCDS14452.1     | chrX_84560848-84560848_C_A    | 462E>D  | Substitution | Nonsynonymous coding | 30% |
| MM04T | POF1B       | premature ovarian failure, 1B                            | CCDS14452.1     | chrX_84634253-84634253_G_T    | 69F>L   | Substitution | Nonsynonymous coding | 26% |
| MM04T | POF1B       | premature ovarian failure, 1B                            | CCDS14452.1     | chrX_84634345-84634345_C_A    | 39A>S   | Substitution | Nonsynonymous coding | 24% |
| MM04T | POGK        | pogo transposable element with KRAB domain               | CCDS1254.1      | chr1_166818709-166818709_T_G  | 298I>S  | Substitution | Nonsynonymous coding | 36% |
| MM04T | POLA1       | polymerase (DNA directed), alpha 1, catalytic subunit    | CCDS14214.1     | chrX_24906160-24906160_G_A    | 1356R>Q | Substitution | Nonsynonymous coding | 21% |
| MM04T | POLE        | polymerase (DNA directed), epsilon, catalytic subunit    | CCDS9278.1      | chr12_133225540-133225540_G_A | 1375A>V | Substitution | Nonsynonymous coding | 34% |
| MM04T | POLE        | polymerase (DNA directed), epsilon, catalytic subunit    | CCDS9278.1      | chr12_133253184-133253184_G_C | 286P>R  | Substitution | Nonsynonymous coding | 27% |
| MM04T | POLG2       | polymerase (DNA directed), gamma 2, accessory subunit    | CCDS32706.1     | chr17_62492686-62492686_T_C   | 134K>R  | Substitution | Nonsynonymous coding | 36% |
| MM04T | POLI        | polymerase (DNA directed) iota                           | CCDS11954.2     | chr18_51820556-51820556_A_C   | 648N>H  | Substitution | Nonsynonymous coding | 33% |
| MM04T | POLN        | polymerase (DNA directed) nu                             | CCDS3360.1      | chr4_2230823-2230823_T_C      | NA      | Substitution | Splice site donor    | 41% |
| MM04T | POLQ        | polymerase (DNA directed), theta                         | CCDS33833.1     | chr3_121168251-121168251_C_T  | 2392G>E | Substitution | Nonsynonymous coding | 11% |
| MM04T | POLQ        | polymerase (DNA directed), theta                         | CCDS33833.1     | chr3_121228428-121228428_C_A  | 647D>Y  | Substitution | Nonsynonymous coding | 39% |
| MM04T | POLQ        | polymerase (DNA directed), theta                         | ENST00000393672 | chr3_121264772-121264772_T_C  | 118R>G  | Substitution | Nonsynonymous coding | 29% |
| MM04T | POLQ        | polymerase (DNA directed), theta                         | ENST00000393672 | chr3_121265230-121265230_C_A  | 87G>X   | Substitution | Nonsense             | 24% |
| MM04T | POLR1B      | polymerase (RNA) I polypeptide B, 128kDa                 | CCDS2097.1      | chr2_113333247-113333247_C_T  | 1117R>W | Substitution | Nonsynonymous coding | 37% |
| MM04T | POLR1E      | polymerase (RNA) I polypeptide E, 53kDa                  | CCDS6611.1      | chr9_37495252-37495252_G_A    | 212D>N  | Substitution | Nonsynonymous coding | 19% |
| MM04T | POLR2A      | polymerase (RNA) II (DNA directed) polypeptide A, 220kDa | CCDS32548.1     | chr17_7402674-7402674_G_A     | 512R>Q  | Substitution | Nonsynonymous coding | 33% |
| MM04T | POLR3B      | polymerase (RNA) III (DNA directed) polypeptide B        | CCDS9105.1      | chr12_106897967-106897967_G_T | 1069M>I | Substitution | Nonsynonymous coding | 32% |
| MM04T | POM121L2    | POM121 transmembrane nucleoporin-like 2                  | NM_033482       | chr6_27278315-27278315_C_A    | 545E>D  | Substitution | Nonsynonymous coding | 26% |
| MM04T | POM121L2    | POM121 transmembrane nucleoporin-like 2                  | NM_033482       | chr6_27278909-27278909_C_A    | 347E>D  | Substitution | Nonsynonymous coding | 30% |
| MM04T | POM121L2    | POM121 transmembrane nucleoporin-like 2                  | NM_033482       | chr6_27279093-27279093_A_T    | 286I>K  | Substitution | Nonsynonymous coding | 22% |
| MM04T | PON2        | paraoxonase 2                                            | CCDS5640.1      | chr7_95045580-95045580_G_A    | 59P>S   | Substitution | Nonsynonymous coding | 26% |
| MM04T | POSTN       | periostin, osteoblast specific factor                    | CCDS9364.1      | chr13_38172796-38172796_T_G   | 23N>T   | Substitution | Nonsynonymous coding | 20% |
| MM04T | POU2F2      | POU class 2 homeobox 2                                   | CCDS33035.1     | chr19_42626697-42626697_C_A   | 20E>D   | Substitution | Nonsynonymous coding | 26% |
| MM04T | POU4F3      | POU class 4 homeobox 3                                   | CCDS4281.1      | chr5_145719823-145719823_G_A  | 278R>H  | Substitution | Nonsynonymous coding | 36% |
| MM04T | POU6F1      | POU class 6 homeobox 1                                   | CCDS31803.1     | chr12_51589905-51589905_C_A   | 33A>S   | Substitution | Nonsynonymous coding | 30% |
| MM04T | PP13004     | -                                                        | ENST00000381493 | chr7_36124078-36124078_C_T    | NA      | Substitution | Splice site acceptor | 29% |
| MM04T | PP2D1       | protein phosphatase 2C-like domain containing 1          | ENST00000389050 | chr3_20042611-20042611_C_A    | 334R>I  | Substitution | Nonsynonymous coding | 35% |
| MM04T | PP2D1       | protein phosphatase 2C-like domain containing 1          | ENST00000389050 | chr3_20043127-20043127_T_G    | 162K>T  | Substitution | Nonsynonymous coding | 53% |
| MM04T | PPAN-P2RY11 | PPAN-P2RY11 readthrough                                  | CCDS42498.1     | chr19_10224334-10224334_C_A   | 435F>L  | Substitution | Nonsynonymous coding | 20% |
| MM04T | PPARA       | peroxisome proliferator-activated receptor alpha         | CCDS33669.1     | chr22_46615873-46615873_G_A   | 225A>T  | Substitution | Nonsynonymous coding | 14% |
| MM04T | PPARG       | peroxisome proliferator-activated receptor gamma         | CCDS2609.1      | chr3_12458537-12458537_G_T    | 385R>L  | Substitution | Nonsynonymous coding | 28% |

|       |          |                                                                                         |                 |                               |         |              |                      |     |
|-------|----------|-----------------------------------------------------------------------------------------|-----------------|-------------------------------|---------|--------------|----------------------|-----|
| MM04T | PPARG    | peroxisome proliferator-activated receptor gamma                                        | CCDS2609.1      | chr3_12458536-12458536_C_T    | 385R>X  | Substitution | Nonsense             | 29% |
| MM04T | PPARGC1A | peroxisome proliferator-activated receptor gamma, coactivator 1 alpha                   | CCDS3429.1      | chr4_23803892-23803892_A_G    | 699V>A  | Substitution | Nonsynonymous coding | 18% |
| MM04T | PPEF1    | protein phosphatase, EF-hand calcium binding domain 1                                   | CCDS14188.1     | chrX_18824657-18824657_G_A    | 463R>H  | Substitution | Nonsynonymous coding | 33% |
| MM04T | PPEF1    | protein phosphatase, EF-hand calcium binding domain 1                                   | CCDS14188.1     | chrX_18845417-18845417_C_T    | 592R>C  | Substitution | Nonsynonymous coding | 22% |
| MM04T | PPEF2    | protein phosphatase, EF-hand calcium binding domain 2                                   | CCDS34013.1     | chr4_76812859-76812859_C_T    | NA      | Substitution | Splice site acceptor | 23% |
| MM04T | PPFIA2   | protein tyrosine phosphatase, receptor type, f polypeptide (PTPRF), interacting protein | NM_003625       | chr12_81655778-81655778_G_A   | 1253R>C | Substitution | Nonsynonymous coding | 33% |
| MM04T | PPFIA2   | protein tyrosine phosphatase, receptor type, f polypeptide (PTPRF), interacting protein | NM_003625       | chr12_81769690-81769690_C_A   | 339R>I  | Substitution | Nonsynonymous coding | 36% |
| MM04T | PPFIA2   | protein tyrosine phosphatase, receptor type, f polypeptide (PTPRF), interacting protein | NM_003625       | chr12_82147853-82147853_G_A   | 50R>W   | Substitution | Nonsynonymous coding | 23% |
| MM04T | PPFIA3   | protein tyrosine phosphatase, receptor type, f polypeptide (PTPRF), interacting protein | CCDS12758.1     | chr19_49652893-49652893_G_T   | 1148E>D | Substitution | Nonsynonymous coding | 18% |
| MM04T | PPFIA4   | protein tyrosine phosphatase, receptor type, f polypeptide (PTPRF), interacting protein | CCDS44296.1     | chr1_203028323-203028323_G_A  | 303E>K  | Substitution | Nonsynonymous coding | 23% |
| MM04T | PPFIBP1  | PTPRF interacting protein, binding protein 1 (liprin beta 1)                            | CCDS8713.1      | chr12_27820104-27820104_G_T   | 333D>Y  | Substitution | Nonsynonymous coding | 13% |
| MM04T | PPFIBP1  | PTPRF interacting protein, binding protein 1 (liprin beta 1)                            | CCDS8713.1      | chr12_27830006-27830006_G_A   | 531R>Q  | Substitution | Nonsynonymous coding | 22% |
| MM04T | PPFIBP2  | PTPRF interacting protein, binding protein 2 (liprin beta 2)                            | CCDS31419.1     | chr11_7647047-7647047_G_T     | 251D>Y  | Substitution | Nonsynonymous coding | 15% |
| MM04T | PPID     | peptidylprolyl isomerase D                                                              | CCDS3801.1      | chr4_159640431-159640431_C_A  | 78K>N   | Substitution | Nonsynonymous coding | 32% |
| MM04T | PPIL4    | peptidylprolyl isomerase (cyclophilin)-like 4                                           | CCDS34550.1     | chr6_149826734-149826734_C_T  | 445R>Q  | Substitution | Nonsynonymous coding | 30% |
| MM04T | PPP5K2   | diphosphoinositol pentakisphosphate kinase 2                                            | CCDS34207.1     | chr5_102484977-102484977_G_A  | 289R>Q  | Substitution | Nonsynonymous coding | 29% |
| MM04T | PPM1J    | protein phosphatase, Mg2+/Mn2+ dependent, 1J                                            | CCDS855.2       | chr1_113255392-113255392_C_T  | 235A>T  | Substitution | Nonsynonymous coding | 31% |
| MM04T | PPM1N    | protein phosphatase, Mg2+/Mn2+ dependent, 1N (putative)                                 | ENST00000401593 | chr19_46005399-46005399_A_C   | 122K>Q  | Substitution | Nonsynonymous coding | 28% |
| MM04T | PPP1R12B | protein phosphatase 1, regulatory subunit 12B                                           | CCDS30973.1     | chr1_202396302-202396302_G_A  | 279R>Q  | Substitution | Nonsynonymous coding | 28% |
| MM04T | PPP1R15B | protein phosphatase 1, regulatory subunit 15B                                           | CCDS1445.1      | chr1_204379897-204379897_T_G  | 215N>H  | Substitution | Nonsynonymous coding | 25% |
| MM04T | PPP1R17  | protein phosphatase 1, regulatory subunit 17                                            | CCDS436.1       | chr7_31736606-31736606_G_T    | 88R>I   | Substitution | Nonsynonymous coding | 27% |
| MM04T | PPP1R36  | protein phosphatase 1, regulatory subunit 36                                            | CCDS9767.1      | chr14_65032134-65032134_G_A   | 110R>Q  | Substitution | Nonsynonymous coding | 28% |
| MM04T | PPP1R3A  | protein phosphatase 1, regulatory subunit 3A                                            | CCDS5759.1      | chr7_113518676-113518676_G_T  | 824S>Y  | Substitution | Nonsynonymous coding | 28% |
| MM04T | PPP1R3A  | protein phosphatase 1, regulatory subunit 3A                                            | CCDS5759.1      | chr7_113519690-113519690_C_T  | 486R>Q  | Substitution | Nonsynonymous coding | 40% |
| MM04T | PPP1R3A  | protein phosphatase 1, regulatory subunit 3A                                            | CCDS5759.1      | chr7_113519706-113519706_C_T  | 481D>N  | Substitution | Nonsynonymous coding | 19% |
| MM04T | PPP1R3A  | protein phosphatase 1, regulatory subunit 3A                                            | CCDS5759.1      | chr7_113520131-113520131_C_A  | 339R>M  | Substitution | Nonsynonymous coding | 44% |
| MM04T | PPP1R3A  | protein phosphatase 1, regulatory subunit 3A                                            | CCDS5759.1      | chr7_113522156-113522156_G_A  | 302R>X  | Substitution | Nonsense             | 36% |
| MM04T | PPP1R9A  | protein phosphatase 1, regulatory subunit 9A                                            | CCDS34683.1     | chr7_94539793-94539793_G_A    | 123R>Q  | Substitution | Nonsynonymous coding | 34% |
| MM04T | PPP2R1B  | protein phosphatase 2, regulatory subunit A, beta                                       | CCDS8348.1      | chr11_111631757-111631757_C_T | 109A>T  | Substitution | Nonsynonymous coding | 21% |
| MM04T | PPP2R3C  | protein phosphatase 2, regulatory subunit B'', gamma                                    | CCDS9654.1      | chr14_35579823-35579823_C_A   | 67D>Y   | Substitution | Nonsynonymous coding | 36% |
| MM04T | PPP2R5D  | protein phosphatase 2, regulatory subunit B', delta                                     | CCDS4878.1      | chr6_42977093-42977093_G_T    | 429E>X  | Substitution | Nonsense             | 28% |
| MM04T | PPP3R1   | protein phosphatase 3, regulatory subunit B, alpha                                      | CCDS46310.1     | chr2_68414394-68414394_T_G    | 91K>N   | Substitution | Nonsynonymous coding | 25% |

|       |          |                                                                          |                 |                               |         |              |                      |     |
|-------|----------|--------------------------------------------------------------------------|-----------------|-------------------------------|---------|--------------|----------------------|-----|
| MM04T | PPP4R1   | protein phosphatase 4, regulatory subunit 1                              | CCDS42412.1     | chr18_9563462-9563462_A_C     | 554L>V  | Substitution | Nonsynonymous coding | 36% |
| MM04T | PPP4R4   | protein phosphatase 4, regulatory subunit 4                              | CCDS9921.1      | chr14_94703970-94703970_T_C   | 267V>A  | Substitution | Nonsynonymous coding | 23% |
| MM04T | PPP6C    | protein phosphatase 6, catalytic subunit                                 | CCDS48018.1     | chr9_127915943-127915943_C_T  | 217E>K  | Substitution | Nonsynonymous coding | 18% |
| MM04T | PPYR1    | pancreatic polypeptide receptor 1                                        | CCDS31193.1     | chr10_47087154-47087154_C_T   | 124S>L  | Substitution | Nonsynonymous coding | 36% |
| MM04T | PRDM10   | PR domain containing 10                                                  | CCDS44771.1     | chr11_129807524-129807524_T_G | 336K>N  | Substitution | Nonsynonymous coding | 32% |
| MM04T | PRDM2    | PR domain containing 2, with ZNF domain                                  | CCDS150.1       | chr1_14107541-14107541_T_C    | 1084V>A | Substitution | Nonsynonymous coding | 37% |
| MM04T | PRDM2    | PR domain containing 2, with ZNF domain                                  | CCDS150.1       | chr1_14108110-14108110_A_C    | 1274K>Q | Substitution | Nonsynonymous coding | 26% |
| MM04T | PRDM5    | PR domain containing 5                                                   | CCDS3716.1      | chr4_121738035-121738035_C_T  | 232R>Q  | Substitution | Nonsynonymous coding | 29% |
| MM04T | PRDM6    | PR domain containing 6                                                   | CCDS47259.1     | chr5_122491677-122491677_G_A  | 334E>K  | Substitution | Nonsynonymous coding | 30% |
| MM04T | PRELP    | proline/arginine-rich end leucine-rich repeat protein                    | CCDS1438.1      | chr1_203455863-203455863_G_A  | 335D>N  | Substitution | Nonsynonymous coding | 32% |
| MM04T | PRELP    | proline/arginine-rich end leucine-rich repeat protein                    | CCDS1438.1      | chr1_203455917-203455917_C_T  | 353R>C  | Substitution | Nonsynonymous coding | 23% |
| MM04T | PREX2    | phosphatidylinositol-3,4,5-trisphosphate-dependent Rac exchange factor 2 | CCDS6201.1      | chr8_68981315-68981315_C_T    | 463R>C  | Substitution | Nonsynonymous coding | 30% |
| MM04T | PREX2    | phosphatidylinositol-3,4,5-trisphosphate-dependent Rac exchange factor 2 | CCDS6201.1      | chr8_68995501-68995501_G_T    | 635K>N  | Substitution | Nonsynonymous coding | 28% |
| MM04T | PRF1     | perforin 1 (pore forming protein)                                        | CCDS7305.1      | chr10_72358485-72358485_G_A   | 331S>L  | Substitution | Nonsynonymous coding | 21% |
| MM04T | PRG4     | proteoglycan 4                                                           | CCDS1369.1      | chr1_186276573-186276573_G_T  | 574K>N  | Substitution | Nonsynonymous coding | 13% |
| MM04T | PRG4     | proteoglycan 4                                                           | CCDS1369.1      | chr1_186281350-186281350_G_T  | 1279Q>H | Substitution | Nonsynonymous coding | 31% |
| MM04T | PRICKLE3 | prickle homolog 3 (Drosophila)                                           | CCDS14320.1     | chrX_49032171-49032171_G_A    | 567R>C  | Substitution | Nonsynonymous coding | 42% |
| MM04T | PRICKLE3 | prickle homolog 3 (Drosophila)                                           | CCDS14320.1     | chrX_49032543-49032543_G_A    | 443L>F  | Substitution | Nonsynonymous coding | 27% |
| MM04T | PRICKLE4 | prickle homolog 4 (Drosophila)                                           | CCDS34449.1     | chr6_41752810-41752810_G_T    | 126K>N  | Substitution | Nonsynonymous coding | 19% |
| MM04T | PRKAA2   | protein kinase, AMP-activated, alpha 2 catalytic subunit                 | CCDS605.1       | chr1_57173166-57173166_G_T    | 480R>I  | Substitution | Nonsynonymous coding | 17% |
| MM04T | PRKAB2   | protein kinase, AMP-activated, beta 2 non-catalytic subunit              | CCDS925.1       | chr1_146639497-146639497_C_A  | 58E>X   | Substitution | Nonsense             | 28% |
| MM04T | PRKACB   | protein kinase, cAMP-dependent, catalytic, beta                          | CCDS693.1       | chr1_84649758-84649758_G_T    | 139E>D  | Substitution | Nonsynonymous coding | 19% |
| MM04T | PRKAR2A  | protein kinase, cAMP-dependent, regulatory, type II, alpha               | CCDS2778.1      | chr3_48828006-48828006_C_A    | 136D>Y  | Substitution | Nonsynonymous coding | 17% |
| MM04T | PRKCG    | protein kinase C, gamma                                                  | CCDS12867.1     | chr19_54387447-54387447_G_A   | 79E>K   | Substitution | Nonsynonymous coding | 30% |
| MM04T | PRKCG    | protein kinase C, gamma                                                  | CCDS12867.1     | chr19_54395836-54395836_G_A   | 254D>N  | Substitution | Nonsynonymous coding | 27% |
| MM04T | PRKCG    | protein kinase C, gamma                                                  | CCDS12867.1     | chr19_54401775-54401775_G_A   | 392D>N  | Substitution | Nonsynonymous coding | 35% |
| MM04T | PRKCG    | protein kinase C, gamma                                                  | CCDS12867.1     | chr19_54403487-54403487_G_A   | 428D>N  | Substitution | Nonsynonymous coding | 26% |
| MM04T | PRKCI    | protein kinase C, iota                                                   | CCDS3212.2      | chr3_169999037-169999037_T_G  | 322F>L  | Substitution | Nonsynonymous coding | 19% |
| MM04T | PRKCSH   | protein kinase C substrate 80K-H                                         | CCDS32911.1     | chr19_11559370-11559370_G_T   | 397E>D  | Substitution | Nonsynonymous coding | 21% |
| MM04T | PRKDC    | protein kinase, DNA-activated, catalytic polypeptide                     | ENST00000314191 | chr8_48868484-48868484_T_G    | 117K>Q  | Substitution | Nonsynonymous coding | 38% |
| MM04T | PRKG1    | protein kinase, cGMP-dependent, type I                                   | CCDS7244.1      | chr10_54041996-54041996_G_T   | 543E>D  | Substitution | Nonsynonymous coding | 29% |
| MM04T | PRKG2    | protein kinase, cGMP-dependent, type II                                  | CCDS3589.1      | chr4_82013542-82013542_C_T    | 731E>K  | Substitution | Nonsynonymous coding | 27% |

|       |         |                                                               |                |                              |         |              |                      |     |
|-------|---------|---------------------------------------------------------------|----------------|------------------------------|---------|--------------|----------------------|-----|
| MM04T | PROCA1  | protein interacting with cyclin A1                            | CCDS11239.1    | chr17_27031166-27031166_C_T  | 141A>T  | Substitution | Nonsynonymous coding | 33% |
| MM04T | PROM2   | prominin 2                                                    | CCDS2012.1     | chr2_95940430-95940430_C_A   | 33L>I   | Substitution | Nonsynonymous coding | 19% |
| MM04T | PROX2   | prospero homeobox 2                                           | CCDS45136.1    | chr14_75321927-75321927_C_T  | 563D>N  | Substitution | Nonsynonymous coding | 30% |
| MM04T | PRPF3   | PRP3 pre-mRNA processing factor 3 homolog (S. cerevisiae)     | CCDS951.1      | chr1_150305616-150305616_G_A | 225G>D  | Substitution | Nonsynonymous coding | 29% |
| MM04T | PRPF39  | PRP39 pre-mRNA processing factor 39 homolog (S. cerevisiae)   | CCDS9682.2     | chr14_45576688-45576688_G_T  | 258D>Y  | Substitution | Nonsynonymous coding | 31% |
| MM04T | PRPF40A | PRP40 pre-mRNA processing factor 40 homolog A (S. cerevisiae) | CCDS46430.1    | chr2_153514443-153514443_G_T | 887S>X  | Substitution | Nonsense             | 32% |
| MM04T | PRPF40B | PRP40 pre-mRNA processing factor 40 homolog B (S. cerevisiae) | CCDS31796.1    | chr12_50027835-50027835_G_T  | 236E>X  | Substitution | Nonsense             | 25% |
| MM04T | PRPH    | peripherin                                                    | CCDS8783.1     | chr12_49690803-49690803_G_T  | 278K>N  | Substitution | Nonsynonymous coding | 32% |
| MM04T | PRR14L  | proline rich 14-like                                          | CCDS13900.2    | chr22_32112479-32112479_T_C  | 449D>G  | Substitution | Nonsynonymous coding | 37% |
| MM04T | PRR16   | proline rich 16                                               | CCDS4127.1     | chr5_120021677-120021677_C_A | 40S>Y   | Substitution | Nonsynonymous coding | 29% |
| MM04T | PRR25   | proline rich 25                                               | CCDS45372.1    | chr16_855450-855450_G_A      | 3R>Q    | Substitution | Nonsynonymous coding | 38% |
| MM04T | PRR25   | proline rich 25                                               | CCDS45372.1    | chr16_855555-855555_G_A      | 38R>K   | Substitution | Nonsynonymous coding | 32% |
| MM04T | PRR9    | proline rich 9                                                | ENST0000368744 | chr1_153190680-153190680_G_T | 20K>N   | Substitution | Nonsynonymous coding | 19% |
| MM04T | PRRC2C  | proline-rich coiled-coil 2C                                   | NM_015172      | chr1_171501615-171501615_G_A | 461R>H  | Substitution | Nonsynonymous coding | 31% |
| MM04T | PRRC2C  | proline-rich coiled-coil 2C                                   | NM_015172      | chr1_171511058-171511058_T_G | 1483L>V | Substitution | Nonsynonymous coding | 31% |
| MM04T | PRRC2C  | proline-rich coiled-coil 2C                                   | NM_015172      | chr1_171535513-171535513_G_T | 2085E>X | Substitution | Nonsense             | 28% |
| MM04T | PRSS12  | protease, serine, 12 (neurotrypsin, motopsin)                 | CCDS3709.1     | chr4_119204044-119204044_C_A | 754W>C  | Substitution | Nonsynonymous coding | 35% |
| MM04T | PRSS38  | protease, serine, 38                                          | CCDS1563.1     | chr1_228033748-228033748_T_C | 274Y>H  | Substitution | Nonsynonymous coding | 22% |
| MM04T | PRSS58  | protease, serine, 58                                          | CCDS5871.1     | chr7_141954995-141954995_T_A | 106K>X  | Substitution | Nonsense             | 31% |
| MM04T | PRTG    | protogenin                                                    | CCDS42040.1    | chr15_55930750-55930750_C_A  | 817E>X  | Substitution | Nonsense             | 25% |
| MM04T | PRTG    | protogenin                                                    | CCDS42040.1    | chr15_55965839-55965839_G_A  | 528R>X  | Substitution | Nonsense             | 34% |
| MM04T | PRUNE2  | prune homolog 2 (Drosophila)                                  | CCDS47982.1    | chr9_79324132-79324132_G_A   | 1020R>X | Substitution | Nonsense             | 53% |
| MM04T | PSMA3   | proteasome (prosome, macropain) subunit, alpha type, 3        | CCDS9731.1     | chr14_58737704-58737704_G_T  | 237E>D  | Substitution | Nonsynonymous coding | 19% |
| MM04T | PSMA8   | proteasome (prosome, macropain) subunit, alpha type, 8        | CCDS32808.1    | chr18_23758836-23758836_C_A  | 180L>I  | Substitution | Nonsynonymous coding | 28% |
| MM04T | PSMB2   | proteasome (prosome, macropain) subunit, beta type, 2         | CCDS394.1      | chr1_36101921-36101921_C_A   | 68K>N   | Substitution | Nonsynonymous coding | 19% |
| MM04T | PSMB4   | proteasome (prosome, macropain) subunit, beta type, 4         | CCDS996.1      | chr1_151372596-151372596_A_G | 94T>A   | Substitution | Nonsynonymous coding | 28% |
| MM04T | PSMB4   | proteasome (prosome, macropain) subunit, beta type, 4         | CCDS996.1      | chr1_151372118-151372118_G_T | 19G>X   | Substitution | Nonsense             | 20% |
| MM04T | PSMC3IP | PSMC3 interacting protein                                     | CCDS45688.1    | chr17_40729568-40729568_G_A  | 16L>F   | Substitution | Nonsynonymous coding | 34% |
| MM04T | PSMD12  | proteasome (prosome, macropain) 26S subunit, non-ATPase, 12   | CCDS11669.1    | chr17_65344682-65344682_A_C  | 165I>S  | Substitution | Nonsynonymous coding | 29% |
| MM04T | PSMD2   | proteasome (prosome, macropain) 26S subunit, non-ATPase, 2    | CCDS3258.1     | chr3_184019678-184019678_G_T | 175D>Y  | Substitution | Nonsynonymous coding | 25% |
| MM04T | PSMD2   | proteasome (prosome, macropain) 26S subunit, non-ATPase, 2    | CCDS3258.1     | chr3_184025298-184025298_G_A | 730G>S  | Substitution | Nonsynonymous coding | 27% |
| MM04T | PSMD5   | proteasome (prosome, macropain) 26S subunit, non-ATPase, 5    | CCDS6824.1     | chr9_123591452-123591452_G_T | 199S>Y  | Substitution | Nonsynonymous coding | 36% |

|       |         |                                                                       |                 |                              |         |              |                      |     |
|-------|---------|-----------------------------------------------------------------------|-----------------|------------------------------|---------|--------------|----------------------|-----|
| MM04T | PSME4   | proteasome (prosome, macropain) activator subunit 4                   | CCDS33197.2     | chr2_54122789-54122789_C_A   | 1258R>I | Substitution | Nonsynonymous coding | 28% |
| MM04T | PSTPIP2 | proline-serine-threonine phosphatase interacting protein 2            | CCDS32820.2     | chr18_43572128-43572128_A_C  | 261I>S  | Substitution | Nonsynonymous coding | 32% |
| MM04T | PTAR1   | protein prenyltransferase alpha subunit repeat containing 1           | CCDS47978.1     | chr9_72338300-72338300_C_A   | 297E>X  | Substitution | Nonsense             | 29% |
| MM04T | PTBP3   | polypyrimidine tract binding protein 3                                | CCDS6784.1      | chr9_115092735-115092735_T_G | 10T>P   | Substitution | Nonsynonymous coding | 17% |
| MM04T | PTCD1   | pentatricopeptide repeat domain 1                                     | CCDS34691.1     | chr7_99027402-99027402_C_T   | 208D>N  | Substitution | Nonsynonymous coding | 33% |
| MM04T | PTCD2   | pentatricopeptide repeat domain 2                                     | CCDS4014.2      | chr5_71634515-71634515_C_A   | 236L>I  | Substitution | Nonsynonymous coding | 23% |
| MM04T | PTCD3   | pentatricopeptide repeat domain 3                                     | CCDS33235.1     | chr2_86352138-86352138_G_T   | 246R>I  | Substitution | Nonsynonymous coding | 24% |
| MM04T | PTCD3   | pentatricopeptide repeat domain 3                                     | CCDS33235.1     | chr2_86344286-86344286_A_C   | NA      | Substitution | Splice site donor    | 40% |
| MM04T | PTCH1   | patched 1                                                             | CCDS6714.1      | chr9_98231138-98231138_G_T   | 715F>L  | Substitution | Nonsynonymous coding | 23% |
| MM04T | PTCH1   | patched 1                                                             | CCDS6714.1      | chr9_98239054-98239054_C_A   | 530R>I  | Substitution | Nonsynonymous coding | 30% |
| MM04T | PTCH2   | patched 2                                                             | CCDS516.1       | chr1_45293243-45293243_G_T   | 734F>L  | Substitution | Nonsynonymous coding | 17% |
| MM04T | PTCH2   | patched 2                                                             | CCDS516.1       | chr1_45297836-45297836_G_T   | 148S>X  | Substitution | Nonsense             | 28% |
| MM04T | PTCHD3  | patched domain containing 3                                           | NM_001034842    | chr10_27687454-27687454_T_G  | 691K>N  | Substitution | Nonsynonymous coding | 30% |
| MM04T | PTDSS1  | phosphatidylserine synthase 1                                         | CCDS6271.1      | chr8_97299342-97299342_C_A   | 137L>I  | Substitution | Nonsynonymous coding | 37% |
| MM04T | PTEN    | phosphatase and tensin homolog                                        | NM_000314       | chr10_89692954-89692954_A    | NA      | Insertion    | Frameshift           | 30% |
| MM04T | PTEN    | phosphatase and tensin homolog                                        | NM_000314       | chr10_89692905-89692905_G_A  | 130R>Q  | Substitution | Nonsynonymous coding | 34% |
| MM04T | PTEN    | phosphatase and tensin homolog                                        | NM_000314       | chr10_89692940-89692940_C_T  | 142R>W  | Substitution | Nonsynonymous coding | 38% |
| MM04T | PTGDR   | prostaglandin D2 receptor (DP)                                        | CCDS9707.1      | chr14_52741617-52741617_T_G  | 339F>V  | Substitution | Nonsynonymous coding | 21% |
| MM04T | PTGES2  | prostaglandin E synthase 2                                            | CCDS6891.1      | chr9_130883542-130883542_C_T | 339G>D  | Substitution | Nonsynonymous coding | 32% |
| MM04T | PTGR1   | prostaglandin reductase 1                                             | CCDS6779.1      | chr9_114332454-114332454_G_A | 266R>C  | Substitution | Nonsynonymous coding | 43% |
| MM04T | PTH1R   | parathyroid hormone 1 receptor                                        | ENST00000313063 | chr3_46930456-46930456_A_C   | 61K>T   | Substitution | Nonsynonymous coding | 29% |
| MM04T | PTK2    | PTK2 protein tyrosine kinase 2                                        | CCDS6381.1      | chr8_141829042-141829042_T_A | 242K>N  | Substitution | Nonsynonymous coding | 25% |
| MM04T | PTMA    | prothymosin, alpha                                                    | ENST00000412128 | chr2_232575138-232575138_C_T | 1A>V    | Substitution | Nonsynonymous coding | 18% |
| MM04T | PTPDC1  | protein tyrosine phosphatase domain containing 1                      | CCDS6708.1      | chr9_96857730-96857730_C_T   | 248R>X  | Substitution | Nonsense             | 34% |
| MM04T | PTPN22  | protein tyrosine phosphatase, non-receptor type 22 (lymphoid)         | CCDS863.1       | chr1_114380728-114380728_T_G | 432N>H  | Substitution | Nonsynonymous coding | 25% |
| MM04T | PTPN3   | protein tyrosine phosphatase, non-receptor type 3                     | CCDS6776.1      | chr9_112182737-112182737_G_T | 427S>Y  | Substitution | Nonsynonymous coding | 16% |
| MM04T | PTPN4   | protein tyrosine phosphatase, non-receptor type 4 (megakaryocyte)     | CCDS2129.1      | chr2_120677790-120677790_T_G | 325F>C  | Substitution | Nonsynonymous coding | 30% |
| MM04T | PTPN5   | protein tyrosine phosphatase, non-receptor type 5 (striatum-enriched) | CCDS7845.1      | chr11_18751236-18751236_G_A  | 487P>S  | Substitution | Nonsynonymous coding | 33% |
| MM04T | PTPN9   | protein tyrosine phosphatase, non-receptor type 9                     | CCDS10280.1     | chr15_75763038-75763038_C_A  | 448E>X  | Substitution | Nonsense             | 35% |
| MM04T | PTPRA   | protein tyrosine phosphatase, receptor type, A                        | CCDS13038.1     | chr20_3008428-3008428_A_G    | 621I>V  | Substitution | Nonsynonymous coding | 34% |
| MM04T | PTPRB   | protein tyrosine phosphatase, receptor type, B                        | CCDS44943.1     | chr12_70965609-70965609_C_A  | 1034R>I | Substitution | Nonsynonymous coding | 35% |
| MM04T | PTPRB   | protein tyrosine phosphatase, receptor type, B                        | CCDS44943.1     | chr12_70989867-70989867_C_T  | 407G>E  | Substitution | Nonsynonymous coding | 15% |

|       |        |                                                              |                 |                               |         |              |                      |     |
|-------|--------|--------------------------------------------------------------|-----------------|-------------------------------|---------|--------------|----------------------|-----|
| MM04T | PTPRC  | protein tyrosine phosphatase, receptor type, C               | CCDS1397.1      | chr1_198665947-198665947_C_A  | 67F>L   | Substitution | Nonsynonymous coding | 36% |
| MM04T | PTPRD  | protein tyrosine phosphatase, receptor type, D               | CCDS43786.1     | chr9_8389296-8389296_C_A      | 1441R>I | Substitution | Nonsynonymous coding | 21% |
| MM04T | PTPRD  | protein tyrosine phosphatase, receptor type, D               | CCDS43786.1     | chr9_8518099-8518099_G_A      | 431S>L  | Substitution | Nonsynonymous coding | 33% |
| MM04T | PTPRD  | protein tyrosine phosphatase, receptor type, D               | CCDS43786.1     | chr9_8633353-8633353_C_T      | 106E>K  | Substitution | Nonsynonymous coding | 26% |
| MM04T | PTPRF  | protein tyrosine phosphatase, receptor type, F               | CCDS489.2       | chr1_44070892-44070892_A_G    | 1056D>G | Substitution | Nonsynonymous coding | 21% |
| MM04T | PTPRG  | protein tyrosine phosphatase, receptor type, G               | CCDS2895.1      | chr3_62177276-62177276_G_T    | 389K>N  | Substitution | Nonsynonymous coding | 31% |
| MM04T | PTPRN  | protein tyrosine phosphatase, receptor type, N               | CCDS2440.1      | chr2_220172550-220172550_G_A  | 44R>C   | Substitution | Nonsynonymous coding | 30% |
| MM04T | PTPRN2 | protein tyrosine phosphatase, receptor type, N polypeptide 2 | CCDS5947.1      | chr7_157475569-157475569_C_T  | 617A>T  | Substitution | Nonsynonymous coding | 24% |
| MM04T | PTPRN2 | protein tyrosine phosphatase, receptor type, N polypeptide 2 | CCDS5947.1      | chr7_157926608-157926608_C_A  | 439E>D  | Substitution | Nonsynonymous coding | 24% |
| MM04T | PTPRQ  | protein tyrosine phosphatase, receptor type, Q               | NM_001145026    | chr12_81062846-81062846_G_T   | 1913D>Y | Substitution | Nonsynonymous coding | 23% |
| MM04T | PTPRT  | protein tyrosine phosphatase, receptor type, T               | CCDS42874.1     | chr20_41306771-41306771_C_A   | 296E>D  | Substitution | Nonsynonymous coding | 31% |
| MM04T | PTPRU  | protein tyrosine phosphatase, receptor type, U               | CCDS334.1       | chr1_29611288-29611288_C_T    | 742S>L  | Substitution | Nonsynonymous coding | 26% |
| MM04T | PTPRZ1 | protein tyrosine phosphatase, receptor-type, Z polypeptide 1 | CCDS34740.1     | chr7_121612642-121612642_G_A  | 118E>K  | Substitution | Nonsynonymous coding | 34% |
| MM04T | PTX3   | pentraxin 3, long                                            | CCDS3180.1      | chr3_157160598-157160598_A_G  | 326T>A  | Substitution | Nonsynonymous coding | 29% |
| MM04T | PTX3   | pentraxin 3, long                                            | CCDS3180.1      | chr3_157160764-157160764_C_A  | 381S>X  | Substitution | Nonsense             | 23% |
| MM04T | PUS7   | pseudouridylate synthase 7 homolog (S. cerevisiae)           | CCDS34725.1     | chr7_105142959-105142959_G_T  | 213S>Y  | Substitution | Nonsynonymous coding | 26% |
| MM04T | PVRL1  | poliovirus receptor-related 1 (herpesvirus entry mediator C) | CCDS8426.1      | chr11_119548526-119548526_G_A | 158R>X  | Substitution | Nonsense             | 19% |
| MM04T | PXDN   | peroxidasin homolog (Drosophila)                             | CCDS46221.1     | chr2_1696905-1696905_C_A      | 68D>Y   | Substitution | Nonsynonymous coding | 19% |
| MM04T | PXDL   | peroxidasin homolog (Drosophila)-like                        | CCDS47855.1     | chr8_52321347-52321347_C_T    | 946R>Q  | Substitution | Nonsynonymous coding | 20% |
| MM04T | PYHIN1 | pyrin and HIN domain family, member 1                        | CCDS1178.1      | chr1_158908874-158908874_G_T  | 139R>I  | Substitution | Nonsynonymous coding | 23% |
| MM04T | PZP    | pregnancy-zone protein                                       | CCDS8600.1      | chr12_9346686-9346686_T_G     | 414K>T  | Substitution | Nonsynonymous coding | 29% |
| MM04T | PZP    | pregnancy-zone protein                                       | ENST00000381997 | chr12_9354982-9354982_C_A     | 7R>I    | Substitution | Nonsynonymous coding | 30% |
| MM04T | QKI    | QKI, KH domain containing, RNA binding                       | CCDS5285.1      | chr6_163876310-163876310_G_T  | NA      | Substitution | Splice site acceptor | 33% |
| MM04T | QPCT   | glutaminyl-peptide cyclotransferase                          | CCDS1790.1      | chr2_37596827-37596827_G_T    | NA      | Substitution | Splice site acceptor | 24% |
| MM04T | QPRT   | quinolinate phosphoribosyltransferase                        | CCDS10651.1     | chr16_29706458-29706458_G_A   | 163D>N  | Substitution | Nonsynonymous coding | 24% |
| MM04T | QRICH2 | glutamine rich 2                                             | CCDS32741.1     | chr17_74300527-74300527_G_A   | 59A>V   | Substitution | Nonsynonymous coding | 31% |
| MM04T | QRICH2 | glutamine rich 2                                             | CCDS32741.1     | chr17_74300552-74300552_C_T   | 51V>I   | Substitution | Nonsynonymous coding | 24% |
| MM04T | QRSL1  | glutaminyl-tRNA synthase (glutamine-hydrolyzing)-like 1      | CCDS5057.1      | chr6_107090946-107090946_T_G  | 121L>V  | Substitution | Nonsynonymous coding | 40% |
| MM04T | QSOX1  | quiescin Q6 sulfhydryl oxidase 1                             | CCDS1337.1      | chr1_180158779-180158779_C_A  | 370F>L  | Substitution | Nonsynonymous coding | 32% |
| MM04T | QSOX1  | quiescin Q6 sulfhydryl oxidase 1                             | CCDS1337.1      | chr1_180163428-180163428_G_A  | 457E>K  | Substitution | Nonsynonymous coding | 20% |
| MM04T | QSOX2  | quiescin Q6 sulfhydryl oxidase 2                             | CCDS35178.1     | chr9_139113660-139113660_G_A  | 268S>L  | Substitution | Nonsynonymous coding | 31% |
| MM04T | R3HDM1 | R3H domain containing 1                                      | ENST00000410054 | chr2_136360239-136360239_T_G  | 32F>L   | Substitution | Nonsynonymous coding | 38% |



|       |             |                                                             |                 |                              |         |              |                      |     |
|-------|-------------|-------------------------------------------------------------|-----------------|------------------------------|---------|--------------|----------------------|-----|
| MM04T | R3HDM4      | R3H domain containing 4                                     | CCDS12048.1     | chr19_899617-899617_C_A      | 211A>S  | Substitution | Nonsynonymous coding | 22% |
| MM04T | R3HDML      | R3H domain containing-like                                  | CCDS13329.1     | chr20_42979340-42979340_C_T  | 224P>S  | Substitution | Nonsynonymous coding | 31% |
| MM04T | RAB11A      | RAB11A, member RAS oncogene family                          | CCDS10212.1     | chr15_66169850-66169850_G_A  | 74R>Q   | Substitution | Nonsynonymous coding | 27% |
| MM04T | RAB11FIP1   | RAB11 family interacting protein 1 (class I)                | CCDS34882.1     | chr8_37729433-37729433_G_T   | 963P>T  | Substitution | Nonsynonymous coding | 36% |
| MM04T | RAB38       | RAB38, member RAS oncogene family                           | CCDS8281.1      | chr11_87883055-87883055_C_A  | 91D>Y   | Substitution | Nonsynonymous coding | 21% |
| MM04T | RAB3A       | RAB3A, member RAS oncogene family                           | CCDS12372.1     | chr19_18308460-18308460_G_T  | 161F>L  | Substitution | Nonsynonymous coding | 20% |
| MM04T | RAB3GAP1    | RAB3 GTPase activating protein subunit 1 (catalytic)        | CCDS33294.1     | chr2_135911363-135911363_T_C | 736W>R  | Substitution | Nonsynonymous coding | 38% |
| MM04T | RAB3GAP2    | RAB3 GTPase activating protein subunit 2 (non-catalytic)    | CCDS31028.1     | chr1_220330761-220330761_C_A | 1136G>X | Substitution | Nonsense             | 18% |
| MM04T | RAB43       | RAB43, member RAS oncogene family                           | CCDS33850.1     | chr3_128813982-128813982_G_A | 79R>W   | Substitution | Nonsynonymous coding | 31% |
| MM04T | RAB4B-EGLN2 | RAB4B-EGLN2 readthrough (non-protein coding)                | CCDS12567.1     | chr19_41307031-41307031_G_A  | 185C>Y  | Substitution | Nonsynonymous coding | 28% |
| MM04T | RAB9B       | RAB9B, member RAS oncogene family                           | CCDS14515.1     | chrX_103080122-103080122_G_T | 198S>Y  | Substitution | Nonsynonymous coding | 25% |
| MM04T | RABEPK      | Rab9 effector protein with kelch motifs                     | ENST00000373544 | chr9_127982615-127982615_C_A | 125S>Y  | Substitution | Nonsynonymous coding | 32% |
| MM04T | RABGAP1     | RAB GTPase activating protein 1                             | CCDS6848.2      | chr9_125782716-125782716_A_C | 591K>T  | Substitution | Nonsynonymous coding | 21% |
| MM04T | RAD18       | RAD18 homolog (S. cerevisiae)                               | CCDS2571.1      | chr3_8990217-8990217_T_G     | 57K>N   | Substitution | Nonsynonymous coding | 32% |
| MM04T | RAD18       | RAD18 homolog (S. cerevisiae)                               | CCDS2571.1      | chr3_8944103-8944103_C_A     | 377E>X  | Substitution | Nonsense             | 28% |
| MM04T | RAD23A      | RAD23 homolog A (S. cerevisiae)                             | CCDS12289.1     | chr19_13059354-13059354_G_A  | 154A>T  | Substitution | Nonsynonymous coding | 19% |
| MM04T | RAD23B      | RAD23 homolog B (S. cerevisiae)                             | CCDS6769.1      | chr9_110087229-110087229_A_C | 354S>R  | Substitution | Nonsynonymous coding | 34% |
| MM04T | RAD50       | RAD50 homolog (S. cerevisiae)                               | CCDS34233.1     | chr5_131923370-131923370_G_T | 291E>D  | Substitution | Nonsynonymous coding | 21% |
| MM04T | RAD51       | RAD51 homolog (S. cerevisiae)                               | CCDS10062.1     | chr15_41001241-41001241_C_A  | 121S>Y  | Substitution | Nonsynonymous coding | 23% |
| MM04T | RAD54B      | RAD54 homolog B (S. cerevisiae)                             | CCDS6262.1      | chr8_95392411-95392411_G_T   | 737L>I  | Substitution | Nonsynonymous coding | 21% |
| MM04T | RAD54L2     | RAD54-like 2 (S. cerevisiae)                                | CCDS33765.2     | chr3_51624446-51624446_G_A   | 4E>K    | Substitution | Nonsynonymous coding | 30% |
| MM04T | RAI1        | retinoic acid induced 1                                     | CCDS11188.1     | chr17_17698804-17698804_G_A  | 848A>T  | Substitution | Nonsynonymous coding | 18% |
| MM04T | RAI14       | retinoic acid induced 14                                    | CCDS34142.1     | chr5_34823188-34823188_C_A   | 414S>Y  | Substitution | Nonsynonymous coding | 23% |
| MM04T | RALGAPA1    | Ral GTPase activating protein, alpha subunit 1 (catalytic)  | CCDS32064.1     | chr14_36039919-36039919_G_A  | 1961A>V | Substitution | Nonsynonymous coding | 37% |
| MM04T | RALGAPA2    | Ral GTPase activating protein, alpha subunit 2 (catalytic)  | CCDS46584.1     | chr20_20634206-20634206_C_T  | 99R>Q   | Substitution | Nonsynonymous coding | 28% |
| MM04T | RALGAPA2    | Ral GTPase activating protein, alpha subunit 2 (catalytic)  | CCDS46584.1     | chr20_20493548-20493548_C_A  | 1489G>X | Substitution | Nonsense             | 29% |
| MM04T | RALGAPB     | Ral GTPase activating protein, beta subunit (non-catalytic) | CCDS13305.1     | chr20_37144845-37144845_G_A  | 295D>N  | Substitution | Nonsynonymous coding | 37% |
| MM04T | RALGAPB     | Ral GTPase activating protein, beta subunit (non-catalytic) | CCDS13305.1     | chr20_37144923-37144923_G_T  | 321E>X  | Substitution | Nonsense             | 32% |
| MM04T | RALGDS      | ral guanine nucleotide dissociation stimulator              | CCDS6959.1      | chr9_135981370-135981370_C_A | 517E>D  | Substitution | Nonsynonymous coding | 31% |
| MM04T | RANBP10     | RAN binding protein 10                                      | CCDS32469.1     | chr16_67763669-67763669_C_T  | 354R>Q  | Substitution | Nonsynonymous coding | 33% |
| MM04T | RANBP2      | RAN binding protein 2                                       | CCDS2079.1      | chr2_109389483-109389483_A   | NA      | Insertion    | Frameshift           | 45% |
| MM04T | RANBP2      | RAN binding protein 2                                       | CCDS2079.1      | chr2_109382596-109382596_A_C | 1867E>D | Substitution | Nonsynonymous coding | 36% |

|       |          |                                                                      |                 |                              |         |              |                      |     |
|-------|----------|----------------------------------------------------------------------|-----------------|------------------------------|---------|--------------|----------------------|-----|
| MM04T | RANBP6   | RAN binding protein 6                                                | CCDS6467.1      | chr9_6013918-6013918_T_C     | 564K>E  | Substitution | Nonsynonymous coding | 24% |
| MM04T | RANGAP1  | Ran GTPase activating protein 1                                      | CCDS14012.1     | chr22_41650357-41650357_C_A  | 405E>D  | Substitution | Nonsynonymous coding | 19% |
| MM04T | RAP2A    | RAP2A, member of RAS oncogene family                                 | CCDS9485.1      | chr13_98116524-98116524_C_T  | 127S>L  | Substitution | Nonsynonymous coding | 32% |
| MM04T | RAPGEF2  | Rap guanine nucleotide exchange factor (GEF)<br>2                    | CCDS43277.1     | chr4_160262864-160262864_C_T | 734R>C  | Substitution | Nonsynonymous coding | 32% |
| MM04T | RAPGEF3  | Rap guanine nucleotide exchange factor (GEF)<br>3                    | CCDS41775.1     | chr12_48131835-48131835_C_T  | 875E>K  | Substitution | Nonsynonymous coding | 18% |
| MM04T | RAPGEF4  | Rap guanine nucleotide exchange factor (GEF)<br>4                    | CCDS42775.1     | chr2_173913371-173913371_G_A | 966S>N  | Substitution | Nonsynonymous coding | 34% |
| MM04T | RAPGEF5  | Rap guanine nucleotide exchange factor (GEF)<br>5                    | NM_012294       | chr7_22184702-22184702_G_A   | 563R>X  | Substitution | Nonsense             | 29% |
| MM04T | RAPGEF6  | Rap guanine nucleotide exchange factor (GEF)<br>6                    | CCDS34225.1     | chr5_130797548-130797548_T_C | 905D>G  | Substitution | Nonsynonymous coding | 36% |
| MM04T | RAPGEF6  | Rap guanine nucleotide exchange factor (GEF)<br>6                    | CCDS34225.1     | chr5_130788793-130788793_G_A | 1052R>X | Substitution | Nonsense             | 25% |
| MM04T | RASA1    | RAS p21 protein activator (GTPase activating<br>protein) 1           | CCDS34200.1     | chr5_86645121-86645121_G_A   | 398R>Q  | Substitution | Nonsynonymous coding | 23% |
| MM04T | RASA2    | RAS p21 protein activator 2                                          | CCDS3117.1      | chr3_141328315-141328315_G_T | 760R>I  | Substitution | Nonsynonymous coding | 37% |
| MM04T | RASAL3   | RAS protein activator like 3                                         | CCDS46006.1     | chr19_15562679-15562679_G_T  | 988S>Y  | Substitution | Nonsynonymous coding | 27% |
| MM04T | RASAL3   | RAS protein activator like 3                                         | CCDS46006.1     | chr19_15567042-15567042_G_T  | 532L>I  | Substitution | Nonsynonymous coding | 18% |
| MM04T | RASAL3   | RAS protein activator like 3                                         | CCDS46006.1     | chr19_15562879-15562879_C_A  | 957E>X  | Substitution | Nonsense             | 17% |
| MM04T | RASGEF1B | RasGEF domain family, member 1B                                      | CCDS34022.1     | chr4_82353495-82353495_C_T   | 452G>E  | Substitution | Nonsynonymous coding | 28% |
| MM04T | RASGEF1C | RasGEF domain family, member 1C                                      | CCDS4452.1      | chr5_179528507-179528507_C_A | 465K>N  | Substitution | Nonsynonymous coding | 17% |
| MM04T | RASGEF1C | RasGEF domain family, member 1C                                      | CCDS4452.1      | chr5_179529141-179529141_G_T | 436L>I  | Substitution | Nonsynonymous coding | 33% |
| MM04T | RASGEF1C | RasGEF domain family, member 1C                                      | CCDS4452.1      | chr5_179546410-179546410_G_T | 281F>L  | Substitution | Nonsynonymous coding | 19% |
| MM04T | RASGRP2  | RAS guanyl releasing protein 2 (calcium and<br>DAG-regulated)        | CCDS31598.1     | chr11_64503129-64503129_C_T  | 394S>N  | Substitution | Nonsynonymous coding | 37% |
| MM04T | RASGRP3  | RAS guanyl releasing protein 3 (calcium and<br>DAG-regulated)        | CCDS46256.1     | chr2_33741645-33741645_G_T   | 36R>I   | Substitution | Nonsynonymous coding | 14% |
| MM04T | RASIP1   | Ras interacting protein 1                                            | CCDS12731.1     | chr19_49227988-49227988_G_A  | 786S>L  | Substitution | Nonsynonymous coding | 33% |
| MM04T | RASIP1   | Ras interacting protein 1                                            | CCDS12731.1     | chr19_49238667-49238667_G_T  | 322S>Y  | Substitution | Nonsynonymous coding | 29% |
| MM04T | RASIP1   | Ras interacting protein 1                                            | CCDS12731.1     | chr19_49243400-49243400_C_A  | NA      | Substitution | Splice site donor    | 16% |
| MM04T | RASSF2   | Ras association (RalGDS/AF-6) domain family<br>member 2              | CCDS13083.1     | chr20_4764939-4764939_C_T    | 321E>K  | Substitution | Nonsynonymous coding | 23% |
| MM04T | RASSF4   | Ras association (RalGDS/AF-6) domain family<br>member 4              | ENST00000374414 | chr10_45478435-45478435_C_T  | 120S>F  | Substitution | Nonsynonymous coding | 38% |
| MM04T | RASSF9   | Ras association (RalGDS/AF-6) domain family<br>(N-terminal) member 9 | CCDS44950.1     | chr12_86199529-86199529_C_T  | 87E>K   | Substitution | Nonsynonymous coding | 32% |
| MM04T | RASSF9   | Ras association (RalGDS/AF-6) domain family<br>(N-terminal) member 9 | CCDS44950.1     | chr12_86199738-86199738_G_A  | 17S>F   | Substitution | Nonsynonymous coding | 29% |
| MM04T | RASSF9   | Ras association (RalGDS/AF-6) domain family<br>(N-terminal) member 9 | CCDS44950.1     | chr12_86198722-86198722_C_A  | 356E>X  | Substitution | Nonsense             | 28% |
| MM04T | RB1      | retinoblastoma 1                                                     | CCDS31973.1     | chr13_48921968-48921968_G_A  | 170E>K  | Substitution | Nonsynonymous coding | 33% |
| MM04T | RB1      | retinoblastoma 1                                                     | CCDS31973.1     | chr13_49039375-49039375_G_A  | 787R>Q  | Substitution | Nonsynonymous coding | 22% |
| MM04T | RBBP6    | retinoblastoma binding protein 6                                     | CCDS10621.1     | chr16_24581699-24581699_G_T  | 1230E>X | Substitution | Nonsense             | 35% |
| MM04T | RBFOX2   | RNA binding protein, fox-1 homolog (C.<br>elegans) 2                 | ENST00000359369 | chr22_36146497-36146497_G_T  | 291S>Y  | Substitution | Nonsynonymous coding | 32% |

|       |        |                                                                                       |                 |                               |         |              |                      |     |
|-------|--------|---------------------------------------------------------------------------------------|-----------------|-------------------------------|---------|--------------|----------------------|-----|
| MM04T | RBL1   | retinoblastoma-like 1 (p107)                                                          | CCDS13289.1     | chr20_35663765-35663765_C_T   | 684A>T  | Substitution | Nonsynonymous coding | 24% |
| MM04T | RBL2   | retinoblastoma-like 2 (p130)                                                          | CCDS10748.1     | chr16_53515716-53515716_T_G   | 1073I>S | Substitution | Nonsynonymous coding | 20% |
| MM04T | RBM12B | RNA binding motif protein 12B                                                         | CCDS43755.1     | chr8_94747425-94747425_C_A    | 405R>I  | Substitution | Nonsynonymous coding | 30% |
| MM04T | RBM26  | RNA binding motif protein 26                                                          | CCDS9462.1      | chr13_79945244-79945244_C_T   | 157R>Q  | Substitution | Nonsynonymous coding | 30% |
| MM04T | RBM39  | RNA binding motif protein 39                                                          | ENST00000397370 | chr20_34322866-34322866_A_G   | 80V>A   | Substitution | Nonsynonymous coding | 20% |
| MM04T | RBM41  | RNA binding motif protein 41                                                          | CCDS14526.1     | chrX_106310812-106310812_G_A  | 396A>V  | Substitution | Nonsynonymous coding | 22% |
| MM04T | RBM45  | RNA binding motif protein 45                                                          | CCDS33335.1     | chr2_178990778-178990778_G_A  | 434D>N  | Substitution | Nonsynonymous coding | 21% |
| MM04T | RBM46  | RNA binding motif protein 46                                                          | CCDS3790.1      | chr4_155720090-155720090_T_G  | 259F>C  | Substitution | Nonsynonymous coding | 33% |
| MM04T | RBM48  | RNA binding motif protein 48                                                          | CCDS43615.1     | chr7_92163778-92163778_G_T    | 171D>Y  | Substitution | Nonsynonymous coding | 26% |
| MM04T | RBMS2  | RNA binding motif, single stranded interacting protein 2                              | CCDS8923.1      | chr12_56965488-56965488_G_A   | 131E>K  | Substitution | Nonsynonymous coding | 30% |
| MM04T | RBMX   | RNA binding motif protein, X-linked                                                   | CCDS14661.1     | chrX_135961586-135961586_T    | NA      | Insertion    | Frameshift           | 12% |
| MM04T | RBP7   | retinol binding protein 7, cellular                                                   | CCDS109.1       | chr1_10067689-10067689_G_T    | 45Q>H   | Substitution | Nonsynonymous coding | 24% |
| MM04T | RBPMS  | RNA binding protein with multiple splicing                                            | CCDS34876.1     | chr8_30404816-30404816_C_T    | 179S>F  | Substitution | Nonsynonymous coding | 39% |
| MM04T | RC3H1  | ring finger and CCCH-type domains 1                                                   | CCDS30940.1     | chr1_173921242-173921242_T_C  | 802Y>C  | Substitution | Nonsynonymous coding | 29% |
| MM04T | RC3H2  | ring finger and CCCH-type domains 2                                                   | CCDS43874.1     | chr9_125621084-125621084_G_T  | 716S>Y  | Substitution | Nonsynonymous coding | 23% |
| MM04T | RCBTB1 | regulator of chromosome condensation (RCC1) and BTB (POZ) domain containing protein 1 | CCDS9418.1      | chr13_50108264-50108264_C_A   | 530K>N  | Substitution | Nonsynonymous coding | 31% |
| MM04T | RCBTB2 | regulator of chromosome condensation (RCC1) and BTB (POZ) domain containing protein 2 | CCDS9411.1      | chr13_49085916-49085916_C_T   | 258R>H  | Substitution | Nonsynonymous coding | 38% |
| MM04T | RCHY1  | ring finger and CHY zinc finger domain containing 1, E3 ubiquitin protein ligase      | CCDS3567.1      | chr4_76419321-76419321_C_T    | 132G>E  | Substitution | Nonsynonymous coding | 31% |
| MM04T | RCSD1  | RCSD domain containing 1                                                              | CCDS1263.1      | chr1_167653222-167653222_C_T  | 31A>V   | Substitution | Nonsynonymous coding | 19% |
| MM04T | RDH11  | retinol dehydrogenase 11 (all-trans/9-cis/11-cis)                                     | CCDS32104.1     | chr14_68151909-68151909_G_A   | 226T>M  | Substitution | Nonsynonymous coding | 42% |
| MM04T | RDH8   | retinol dehydrogenase 8 (all-trans)                                                   | CCDS12223.1     | chr19_10132074-10132074_T_G   | 227L>R  | Substitution | Nonsynonymous coding | 28% |
| MM04T | RDX    | radixin                                                                               | CCDS8343.1      | chr11_110108287-110108287_C_T | 394R>Q  | Substitution | Nonsynonymous coding | 48% |
| MM04T | RECQL  | RecQ protein-like (DNA helicase Q1-like)                                              | CCDS31756.1     | chr12_21639489-21639489_G_T   | 142S>Y  | Substitution | Nonsynonymous coding | 24% |
| MM04T | RECQL4 | RecQ protein-like 4                                                                   | ENST00000428558 | chr8_145738802-145738802_G_A  | 755R>W  | Substitution | Nonsynonymous coding | 25% |
| MM04T | RECQL5 | RecQ protein-like 5                                                                   | CCDS42380.1     | chr17_73657697-73657697_G_A   | 288A>V  | Substitution | Nonsynonymous coding | 30% |
| MM04T | REN    | renin                                                                                 | CCDS30981.1     | chr1_204124205-204124205_C_T  | 387R>Q  | Substitution | Nonsynonymous coding | 31% |
| MM04T | REN    | renin                                                                                 | CCDS30981.1     | chr1_204130528-204130528_C_T  | 89E>K   | Substitution | Nonsynonymous coding | 30% |
| MM04T | REN    | renin                                                                                 | CCDS30981.1     | chr1_204131277-204131277_C_A  | 38R>I   | Substitution | Nonsynonymous coding | 28% |
| MM04T | REPS1  | RALBP1 associated Eps domain containing 1                                             | CCDS5193.2      | chr6_139232480-139232480_G_T  | 666S>Y  | Substitution | Nonsynonymous coding | 29% |
| MM04T | REPS1  | RALBP1 associated Eps domain containing 1                                             | CCDS5193.2      | chr6_139264669-139264669_G_T  | 321L>I  | Substitution | Nonsynonymous coding | 25% |
| MM04T | REPS1  | RALBP1 associated Eps domain containing 1                                             | CCDS5193.2      | chr6_139232475-139232475_G_A  | 668R>X  | Substitution | Nonsense             | 29% |
| MM04T | REPS2  | RALBP1 associated Eps domain containing 2                                             | CCDS14180.2     | chrX_17080633-17080633_C_A    | 396P>H  | Substitution | Nonsynonymous coding | 18% |

|       |        |                                                               |              |                              |         |              |                      |     |
|-------|--------|---------------------------------------------------------------|--------------|------------------------------|---------|--------------|----------------------|-----|
| MM04T | RERE   | arginine-glutamic acid dipeptide (RE) repeats                 | CCDS95.1     | chr1_8426017-8426017_G_T     | 434F>L  | Substitution | Nonsynonymous coding | 16% |
| MM04T | REST   | RE1-silencing transcription factor                            | CCDS3509.1   | chr4_57797638-57797638_T_G   | 872L>V  | Substitution | Nonsynonymous coding | 34% |
| MM04T | REV1   | REV1, polymerase (DNA directed)                               | CCDS2045.1   | chr2_100055239-100055239_C_T | 346C>Y  | Substitution | Nonsynonymous coding | 27% |
| MM04T | REV3L  | REV3-like, polymerase (DNA directed), zeta, catalytic subunit | CCDS5091.2   | chr6_111694785-111694785_T_G | 1591Q>H | Substitution | Nonsynonymous coding | 27% |
| MM04T | REV3L  | REV3-like, polymerase (DNA directed), zeta, catalytic subunit | CCDS5091.2   | chr6_111696908-111696908_C_T | 884A>T  | Substitution | Nonsynonymous coding | 27% |
| MM04T | REXO1  | REX1, RNA exonuclease 1 homolog (S. cerevisiae)               | CCDS32866.1  | chr19_1816761-1816761_C_T    | 1085D>N | Substitution | Nonsynonymous coding | 20% |
| MM04T | REXO1  | REX1, RNA exonuclease 1 homolog (S. cerevisiae)               | CCDS32866.1  | chr19_1828421-1828421_C_T    | 123E>K  | Substitution | Nonsynonymous coding | 33% |
| MM04T | RFC1   | replication factor C (activator 1) 1, 145kDa                  | CCDS3450.1   | chr4_39329146-39329146_C_A   | 188E>X  | Substitution | Nonsense             | 35% |
| MM04T | RFC2   | replication factor C (activator 1) 2, 40kDa                   | CCDS5568.1   | chr7_73654342-73654342_C_T   | 207E>K  | Substitution | Nonsynonymous coding | 19% |
| MM04T | RFC3   | replication factor C (activator 1) 3, 38kDa                   | CCDS9352.1   | chr13_34399927-34399927_G_T  | 99D>Y   | Substitution | Nonsynonymous coding | 35% |
| MM04T | RFTN1  | raftlin, lipid raft linker 1                                  | CCDS33712.1  | chr3_16358410-16358410_G_T   | 554H>Q  | Substitution | Nonsynonymous coding | 21% |
| MM04T | RFTN2  | raftlin family member 2                                       | CCDS2323.1   | chr2_198495775-198495775_C_G | 296L>F  | Substitution | Nonsynonymous coding | 34% |
| MM04T | RFX6   | regulatory factor X, 6                                        | CCDS5113.1   | chr6_117237440-117237440_T_G | 312I>S  | Substitution | Nonsynonymous coding | 39% |
| MM04T | RFX8   | RFX family member 8, lacking RFX DNA binding domain           | CCDS46376.1  | chr2_102027101-102027101_G_T | 265L>I  | Substitution | Nonsynonymous coding | 14% |
| MM04T | RFXAP  | regulatory factor X-associated protein                        | CCDS9359.1   | chr13_37401818-37401818_G_T  | 249Q>H  | Substitution | Nonsynonymous coding | 19% |
| MM04T | RGAG4  | retrotransposon gag domain containing 4                       | NM_001024455 | chrX_71350454-71350454_C_T   | 313V>I  | Substitution | Nonsynonymous coding | 20% |
| MM04T | RGAG4  | retrotransposon gag domain containing 4                       | NM_001024455 | chrX_71351330-71351330_C_A   | 21E>X   | Substitution | Nonsense             | 21% |
| MM04T | RGR    | retinal G protein coupled receptor                            | CCDS7374.1   | chr10_86018368-86018368_G_T  | 287Q>H  | Substitution | Nonsynonymous coding | 24% |
| MM04T | RGR    | retinal G protein coupled receptor                            | CCDS7374.1   | chr10_86018377-86018377_G_T  | 290E>D  | Substitution | Nonsynonymous coding | 29% |
| MM04T | RGS12  | regulator of G-protein signaling 12                           | CCDS3366.1   | chr4_3318204-3318204_G_A     | 103E>K  | Substitution | Nonsynonymous coding | 33% |
| MM04T | RGS14  | regulator of G-protein signaling 14                           | CCDS43405.1  | chr5_176798489-176798489_G_T | 466R>I  | Substitution | Nonsynonymous coding | 20% |
| MM04T | RGS18  | regulator of G-protein signaling 18                           | CCDS1374.1   | chr1_192153451-192153451_G_T | 159E>X  | Substitution | Nonsense             | 34% |
| MM04T | RGS2   | regulator of G-protein signaling 2, 24kDa                     | CCDS1377.1   | chr1_192780144-192780144_C_T | 103S>L  | Substitution | Nonsynonymous coding | 18% |
| MM04T | RGS3   | regulator of G-protein signaling 3                            | CCDS43869.1  | chr9_116224127-116224127_G_A | 74R>Q   | Substitution | Nonsynonymous coding | 32% |
| MM04T | RGS3   | regulator of G-protein signaling 3                            | CCDS43869.1  | chr9_116345947-116345947_C_A | 752S>Y  | Substitution | Nonsynonymous coding | 17% |
| MM04T | RGS5   | regulator of G-protein signaling 5                            | CCDS1244.1   | chr1_163122475-163122475_C_A | 83K>N   | Substitution | Nonsynonymous coding | 32% |
| MM04T | RGS6   | regulator of G-protein signaling 6                            | CCDS9808.1   | chr14_72985078-72985078_G_T  | 371D>Y  | Substitution | Nonsynonymous coding | 61% |
| MM04T | RGS7BP | regulator of G-protein signaling 7 binding protein            | CCDS34170.1  | chr5_63894255-63894255_A_C   | 225K>N  | Substitution | Nonsynonymous coding | 23% |
| MM04T | RGSL1  | regulator of G-protein signaling like 1                       | NM_001137669 | chr1_182429135-182429135_C_A | NA      | Substitution | Splice site acceptor | 22% |
| MM04T | RGSL1  | regulator of G-protein signaling like 1                       | NM_001137669 | chr1_182499375-182499375_C_A | NA      | Substitution | Splice site acceptor | 26% |
| MM04T | RHOD   | ras homolog family member D                                   | CCDS8155.1   | chr11_66834253-66834253_G_A  | 89A>T   | Substitution | Nonsynonymous coding | 30% |
| MM04T | RHOT2  | ras homolog family member T2                                  | CCDS10417.1  | chr16_721127-721127_G_A      | 265E>K  | Substitution | Nonsynonymous coding | 18% |

|       |        |                                                                     |                 |                               |        |              |                      |     |
|-------|--------|---------------------------------------------------------------------|-----------------|-------------------------------|--------|--------------|----------------------|-----|
| MM04T | RHOXF1 | Rhox homeobox family, member 1                                      | CCDS14593.1     | chrX_119249445-119249445_A_C  | 110F>V | Substitution | Nonsynonymous coding | 31% |
| MM04T | RIC8B  | resistance to inhibitors of cholinesterase 8 homolog B (C. elegans) | ENST00000436486 | chr12_107264731-107264731_C_T | 528P>S | Substitution | Nonsynonymous coding | 37% |
| MM04T | RICTOR | RPTOR independent companion of MTOR, complex 2                      | CCDS34148.1     | chr5_38953633-38953633_C_T    | 907R>H | Substitution | Nonsynonymous coding | 26% |
| MM04T | RICTOR | RPTOR independent companion of MTOR, complex 2                      | CCDS34148.1     | chr5_38957819-38957819_G_A    | 812P>S | Substitution | Nonsynonymous coding | 21% |
| MM04T | RICTOR | RPTOR independent companion of MTOR, complex 2                      | CCDS34148.1     | chr5_39002633-39002633_T_C    | NA     | Substitution | Splice site donor    | 26% |
| MM04T | RIMBP2 | RIMS binding protein 2                                              | CCDS31925.1     | chr12_130898831-130898831_G_T | 831L>I | Substitution | Nonsynonymous coding | 11% |
| MM04T | RIMBP2 | RIMS binding protein 2                                              | CCDS31925.1     | chr12_130921748-130921748_C_A | 565R>L | Substitution | Nonsynonymous coding | 19% |
| MM04T | RIMS1  | regulating synaptic membrane exocytosis 1                           | CCDS47449.1     | chr6_72943483-72943483_G_T    | 562L>F | Substitution | Nonsynonymous coding | 23% |
| MM04T | RIMS2  | regulating synaptic membrane exocytosis 2                           | CCDS43761.1     | chr8_105025783-105025783_A_G  | 867N>S | Substitution | Nonsynonymous coding | 34% |
| MM04T | RINT1  | RAD50 interactor 1                                                  | CCDS34726.1     | chr7_105204357-105204357_G_T  | 617E>X | Substitution | Nonsense             | 41% |
| MM04T | RIPK2  | receptor-interacting serine-threonine kinase 2                      | CCDS6247.1      | chr8_90802523-90802523_T_G    | 501F>C | Substitution | Nonsynonymous coding | 37% |
| MM04T | RIPK3  | receptor-interacting serine-threonine kinase 3                      | CCDS9628.1      | chr14_24805602-24805602_C_T   | NA     | Substitution | Splice site acceptor | 33% |
| MM04T | RLIM   | ring finger protein, LIM domain interacting                         | CCDS14427.1     | chrX_73812275-73812275_C_A    | 292R>I | Substitution | Nonsynonymous coding | 25% |
| MM04T | RMDN2  | regulator of microtubule dynamics 2                                 | CCDS1792.1      | chr2_38178836-38178836_G_A    | 160E>K | Substitution | Nonsynonymous coding | 28% |
| MM04T | RMDN2  | regulator of microtubule dynamics 2                                 | CCDS1792.1      | chr2_38178975-38178975_C_T    | 206A>V | Substitution | Nonsynonymous coding | 35% |
| MM04T | RMDN2  | regulator of microtubule dynamics 2                                 | ENST00000406963 | chr2_38244343-38244343_G_T    | 487Q>H | Substitution | Nonsynonymous coding | 19% |
| MM04T | RMND5B | required for meiotic nuclear division 5 homolog B (S. cerevisiae)   | CCDS4431.1      | chr5_177573133-177573133_G_A  | 238G>D | Substitution | Nonsynonymous coding | 27% |
| MM04T | RNASE9 | ribonuclease, RNase A family, 9 (non-active)                        | CCDS32036.1     | chr14_21024970-21024970_T_G   | 87I>L  | Substitution | Nonsynonymous coding | 24% |
| MM04T | RNASEL | ribonuclease L (2',5'-oligoadenylate synthetase-dependent)          | CCDS1347.1      | chr1_182544637-182544637_T_G  | 706K>Q | Substitution | Nonsynonymous coding | 35% |
| MM04T | RNF128 | ring finger protein 128, E3 ubiquitin protein ligase                | CCDS14520.1     | chrX_105937275-105937275_A_C  | 15I>L  | Substitution | Nonsynonymous coding | 30% |
| MM04T | RNF128 | ring finger protein 128, E3 ubiquitin protein ligase                | CCDS14521.1     | chrX_105970341-105970341_C_A  | 66S>R  | Substitution | Nonsynonymous coding | 33% |
| MM04T | RNF138 | ring finger protein 138, E3 ubiquitin protein ligase                | CCDS11903.1     | chr18_29691863-29691863_G_T   | 86C>F  | Substitution | Nonsynonymous coding | 16% |
| MM04T | RNF139 | ring finger protein 139                                             | CCDS6350.1      | chr8_125499506-125499506_G_A  | 539R>H | Substitution | Nonsynonymous coding | 32% |
| MM04T | RNF148 | ring finger protein 148                                             | CCDS47692.1     | chr7_122342273-122342273_C_A  | 178E>X | Substitution | Nonsense             | 38% |
| MM04T | RNF167 | ring finger protein 167                                             | CCDS11060.1     | chr17_4845732-4845732_C_T     | 88R>X  | Substitution | Nonsense             | 23% |
| MM04T | RNF168 | ring finger protein 168, E3 ubiquitin protein ligase                | CCDS3317.1      | chr3_196199531-196199531_G_T  | 292S>Y | Substitution | Nonsynonymous coding | 18% |
| MM04T | RNF17  | ring finger protein 17                                              | CCDS9308.2      | chr13_25352439-25352439_G_T   | 108K>N | Substitution | Nonsynonymous coding | 27% |
| MM04T | RNF17  | ring finger protein 17                                              | CCDS9308.2      | chr13_25362269-25362269_C_A   | 252S>Y | Substitution | Nonsynonymous coding | 25% |
| MM04T | RNF17  | ring finger protein 17                                              | CCDS9308.2      | chr13_25418929-25418929_A_G   | 991T>A | Substitution | Nonsynonymous coding | 22% |
| MM04T | RNF175 | ring finger protein 175                                             | CCDS47149.1     | chr4_154672600-154672600_C_A  | 32D>Y  | Substitution | Nonsynonymous coding | 31% |
| MM04T | RNF207 | ring finger protein 207                                             | CCDS59.2        | chr1_6266716-6266716_T_G      | 41F>V  | Substitution | Nonsynonymous coding | 22% |
| MM04T | RNF213 | ring finger protein 213                                             | CCDS11772.1     | chr17_78263601-78263601_A_C   | 359K>N | Substitution | Nonsynonymous coding | 14% |

|       |               |                                                                               |                 |                               |         |              |                      |     |
|-------|---------------|-------------------------------------------------------------------------------|-----------------|-------------------------------|---------|--------------|----------------------|-----|
| MM04T | RNF219        | ring finger protein 219                                                       | CCDS31997.1     | chr13_79191201-79191201_T_C   | 232E>G  | Substitution | Nonsynonymous coding | 31% |
| MM04T | RNF219        | ring finger protein 219                                                       | CCDS31997.1     | chr13_79219006-79219006_C_A   | 67E>X   | Substitution | Nonsense             | 25% |
| MM04T | RNF32         | ring finger protein 32                                                        | CCDS5944.1      | chr7_156451242-156451242_G_T  | 221R>I  | Substitution | Nonsynonymous coding | 26% |
| MM04T | RNF6          | ring finger protein (C3H2C3 type) 6                                           | CCDS9316.1      | chr13_26788214-26788214_C_T   | 602R>Q  | Substitution | Nonsynonymous coding | 35% |
| MM04T | RNF6          | ring finger protein (C3H2C3 type) 6                                           | CCDS9316.1      | chr13_26788215-26788215_G_A   | 602R>X  | Substitution | Nonsense             | 32% |
| MM04T | RNF8          | ring finger protein 8, E3 ubiquitin protein ligase                            | CCDS4834.1      | chr6_37336452-37336452_G_T    | 145E>X  | Substitution | Nonsense             | 12% |
| MM04T | RNFT1         | ring finger protein, transmembrane 1                                          | CCDS11622.2     | chr17_58034719-58034719_C_A   | 291E>X  | Substitution | Nonsense             | 32% |
| MM04T | RNGTT         | RNA guanylyltransferase and 5'-phosphatase                                    | CCDS5017.1      | chr6_89638724-89638724_C_A    | 116R>I  | Substitution | Nonsynonymous coding | 27% |
| MM04T | ROBO1         | roundabout, axon guidance receptor, homolog 1 (Drosophila)                    | CCDS46872.1     | chr3_78676616-78676616_G_A    | 1205R>W | Substitution | Nonsynonymous coding | 29% |
| MM04T | ROBO2         | roundabout, axon guidance receptor, homolog 2 (Drosophila)                    | CCDS43109.1     | chr3_77607107-77607107_G_T    | 415R>I  | Substitution | Nonsynonymous coding | 41% |
| MM04T | ROBO2         | roundabout, axon guidance receptor, homolog 2 (Drosophila)                    | CCDS43109.1     | chr3_77671487-77671487_G_A    | 1222D>N | Substitution | Nonsynonymous coding | 27% |
| MM04T | ROBO4         | roundabout, axon guidance receptor, homolog 4 (Drosophila)                    | CCDS8455.1      | chr11_124766503-124766503_G_A | 155T>I  | Substitution | Nonsynonymous coding | 17% |
| MM04T | ROR1          | receptor tyrosine kinase-like orphan receptor 1                               | CCDS626.1       | chr1_64624793-64624793_C_T    | 435S>L  | Substitution | Nonsynonymous coding | 31% |
| MM04T | ROS1          | c-ros oncogene 1 , receptor tyrosine kinase                                   | CCDS5116.1      | chr6_117639383-117639383_C_A  | 1991K>N | Substitution | Nonsynonymous coding | 40% |
| MM04T | ROS1          | c-ros oncogene 1 , receptor tyrosine kinase                                   | CCDS5116.1      | chr6_117674241-117674241_C_A  | 1411K>N | Substitution | Nonsynonymous coding | 25% |
| MM04T | RP1           | retinitis pigmentosa 1 (autosomal dominant)                                   | CCDS6160.1      | chr8_55538363-55538363_A_G    | 641R>G  | Substitution | Nonsynonymous coding | 14% |
| MM04T | RP1           | retinitis pigmentosa 1 (autosomal dominant)                                   | CCDS6160.1      | chr8_55538595-55538595_A_C    | 718D>A  | Substitution | Nonsynonymous coding | 38% |
| MM04T | RP1           | retinitis pigmentosa 1 (autosomal dominant)                                   | CCDS6160.1      | chr8_55540850-55540850_G_T    | 1470E>X | Substitution | Nonsense             | 41% |
| MM04T | RP11-108K14.4 | Putative scavenger receptor cysteine-rich domain-containing protein LOC619207 | ENST00000333815 | chr10_135269966-135269966_G_A | 98R>Q   | Substitution | Nonsynonymous coding | 32% |
| MM04T | RP11-108K14.4 | Putative scavenger receptor cysteine-rich domain-containing protein LOC619207 | ENST00000333815 | chr10_135279785-135279785_C_A | 902F>L  | Substitution | Nonsynonymous coding | 31% |
| MM04T | RP11-121L10.3 | -                                                                             | ENST00000318973 | chr11_90016189-90016189_C_T   | 122R>C  | Substitution | Nonsynonymous coding | 26% |
| MM04T | RP11-351E7.2  | -                                                                             | ENST00000391672 | chr8_73342131-73342131_G_T    | 92K>N   | Substitution | Nonsynonymous coding | 31% |
| MM04T | RP11-455G16.1 | Uncharacterized protein<br>[Source:UniProtKB/TrEMBL;Acc:E7EQP2]               | ENST00000326780 | chr4_120116700-120116700_G_T  | 91L>I   | Substitution | Nonsynonymous coding | 18% |
| MM04T | RP11-707M1.1  | -                                                                             | ENST00000357667 | chr11_49597952-49597952_T_C   | 51V>A   | Substitution | Nonsynonymous coding | 41% |
| MM04T | RP11-722P11.6 | -                                                                             | ENST00000328207 | chr12_48954387-48954387_C_A   | 236C>X  | Substitution | Nonsense             | 32% |
| MM04T | RP11-723O4.6  | Uncharacterized protein FLJ43738<br>[Source:UniProtKB/Swiss-Prot;Acc:Q6ZUG5]  | ENST00000344062 | chr3_128664589-128664589_A_G  | 74F>S   | Substitution | Nonsynonymous coding | 23% |
| MM04T | RP111         | retinitis pigmentosa 1-like 1                                                 | CCDS43708.1     | chr8_10480645-10480645_G_A    | 23R>C   | Substitution | Nonsynonymous coding | 24% |
| MM04T | RP3-368B9.1   | Uncharacterized protein<br>[Source:UniProtKB/TrEMBL;Acc:E7ETJ0]               | ENST00000404649 | chr4_3589701-3589701_G_T      | 23Q>H   | Substitution | Nonsynonymous coding | 11% |
| MM04T | RPE65         | retinal pigment epithelium-specific protein 65kDa                             | CCDS643.1       | chr1_68896769-68896769_C_A    | 477D>Y  | Substitution | Nonsynonymous coding | 17% |
| MM04T | RPGRIP1L      | RPGRIP1-like                                                                  | CCDS32447.1     | chr16_53653105-53653105_G_A   | 1150R>W | Substitution | Nonsynonymous coding | 36% |
| MM04T | RPGRIP1L      | RPGRIP1-like                                                                  | CCDS32447.1     | chr16_53691371-53691371_A_C   | 525D>E  | Substitution | Nonsynonymous coding | 33% |
| MM04T | RPL17         | ribosomal protein L17                                                         | CCDS45865.1     | chr18_47016847-47016847_C_T   | 98A>T   | Substitution | Nonsynonymous coding | 29% |

|       |                |                                                                         |                 |                               |         |              |                      |     |
|-------|----------------|-------------------------------------------------------------------------|-----------------|-------------------------------|---------|--------------|----------------------|-----|
| MM04T | RPL27          | ribosomal protein L27                                                   | CCDS11449.1     | chr17_41154904-41154904_G_T   | 126K>N  | Substitution | Nonsynonymous coding | 43% |
| MM04T | RPL3L          | ribosomal protein L3-like                                               | CCDS10450.1     | chr16_2000865-2000865_G_A     | 161R>W  | Substitution | Nonsynonymous coding | 32% |
| MM04T | RPN2           | ribophorin II                                                           | CCDS13291.1     | chr20_35860711-35860711_G_A   | 532E>K  | Substitution | Nonsynonymous coding | 29% |
| MM04T | RPP14          | ribonuclease P/MRP 14kDa subunit                                        | CCDS2888.1      | chr3_58296303-58296303_G_T    | 49K>N   | Substitution | Nonsynonymous coding | 19% |
| MM04T | RPP14          | ribonuclease P/MRP 14kDa subunit                                        | CCDS2888.1      | chr3_58302306-58302306_G_T    | 76R>I   | Substitution | Nonsynonymous coding | 24% |
| MM04T | RPP25L         | ribonuclease P/MRP 25kDa subunit-like                                   | CCDS6559.1      | chr9_34610819-34610819_G_A    | 159R>X  | Substitution | Nonsense             | 23% |
| MM04T | RPP40          | ribonuclease P/MRP 40kDa subunit                                        | CCDS34333.1     | chr6_5002341-5002341_T_C      | 88K>E   | Substitution | Nonsynonymous coding | 36% |
| MM04T | RPS6KA1        | ribosomal protein S6 kinase, 90kDa, polypeptide 1                       | CCDS30649.1     | chr1_26873692-26873692_C_T    | 89R>W   | Substitution | Nonsynonymous coding | 25% |
| MM04T | RPS6KA1        | ribosomal protein S6 kinase, 90kDa, polypeptide 1                       | CCDS30649.1     | chr1_26887302-26887302_G_A    | 443R>H  | Substitution | Nonsynonymous coding | 21% |
| MM04T | RPS6KA3        | ribosomal protein S6 kinase, 90kDa, polypeptide 3                       | CCDS14197.1     | chrX_20179781-20179781_G_T    | 647S>Y  | Substitution | Nonsynonymous coding | 39% |
| MM04T | RPS6KA3        | ribosomal protein S6 kinase, 90kDa, polypeptide 3                       | CCDS14197.1     | chrX_20183109-20183109_G_A    | 558R>X  | Substitution | Nonsense             | 16% |
| MM04T | RPS6KA6        | ribosomal protein S6 kinase, 90kDa, polypeptide 6                       | CCDS14451.1     | chrX_83403078-83403078_C_A    | 104M>I  | Substitution | Nonsynonymous coding | 33% |
| MM04T | RPS6KL1        | ribosomal protein S6 kinase-like 1                                      | CCDS9834.1      | chr14_75388145-75388145_G_A   | 34R>C   | Substitution | Nonsynonymous coding | 22% |
| MM04T | RPTOR          | regulatory associated protein of MTOR, complex 1                        | CCDS11773.1     | chr17_78882621-78882621_T_G   | 804F>L  | Substitution | Nonsynonymous coding | 26% |
| MM04T | RRAGB          | Ras-related GTP binding B                                               | CCDS14372.1     | chrX_55744846-55744846_C_T    | 29S>L   | Substitution | Nonsynonymous coding | 25% |
| MM04T | RRBP1          | ribosome binding protein 1                                              | CCDS13128.1     | chr20_17595521-17595521_C_A   | 919R>I  | Substitution | Nonsynonymous coding | 19% |
| MM04T | RRBP1          | ribosome binding protein 1                                              | ENST00000246043 | chr20_17639379-17639379_C_T   | 592A>T  | Substitution | Nonsynonymous coding | 25% |
| MM04T | RRBP1          | ribosome binding protein 1                                              | CCDS13128.1     | chr20_17640733-17640733_C_A   | 140K>N  | Substitution | Nonsynonymous coding | 37% |
| MM04T | RSAD2          | radical S-adenosyl methionine domain containing 2                       | CCDS1656.1      | chr2_7033818-7033818_T_G      | 302L>R  | Substitution | Nonsynonymous coding | 31% |
| MM04T | RSBN1          | round spermatid basic protein 1                                         | CCDS862.1       | chr1_114308864-114308864_C_A  | 716S>I  | Substitution | Nonsynonymous coding | 21% |
| MM04T | RSF1           | remodeling and spacing factor 1                                         | CCDS8253.1      | chr11_77396175-77396175_C_A   | 977S>I  | Substitution | Nonsynonymous coding | 35% |
| MM04T | RSRC1          | arginine/serine-rich coiled-coil 1                                      | CCDS3181.1      | chr3_157841711-157841711_G_A  | 84R>Q   | Substitution | Nonsynonymous coding | 27% |
| MM04T | RTCA           | RNA 3'-terminal phosphate cyclase                                       | CCDS44178.1     | chr1_100738975-100738975_T_G  | 160F>C  | Substitution | Nonsynonymous coding | 42% |
| MM04T | RTEL1-TNFRSF6B | RTEL1-TNFRSF6B readthrough (non-protein coding)                         | CCDS13530.2     | chr20_62319098-62319098_T_C   | 486S>P  | Substitution | Nonsynonymous coding | 15% |
| MM04T | RTF1           | Rtf1, Paf1/RNA polymerase II complex component, homolog (S. cerevisiae) | CCDS32200.2     | chr15_41772424-41772424_G_T   | 643D>Y  | Substitution | Nonsynonymous coding | 30% |
| MM04T | RTL1           | retrotransposon-like 1                                                  | NM_001134888    | chr14_101347575-101347575_C_T | 1184R>Q | Substitution | Nonsynonymous coding | 24% |
| MM04T | RTP1           | receptor (chemosensory) transporter protein 1                           | CCDS3287.2      | chr3_186917626-186917626_G_A  | 187R>H  | Substitution | Nonsynonymous coding | 32% |
| MM04T | RTP2           | receptor (chemosensory) transporter protein 2                           | CCDS33911.1     | chr3_187419779-187419779_C_A  | 46Q>H   | Substitution | Nonsynonymous coding | 42% |
| MM04T | RTTN           | rotatin                                                                 | CCDS42443.1     | chr18_67759986-67759986_T_G   | 1320K>Q | Substitution | Nonsynonymous coding | 35% |
| MM04T | RUFY2          | RUN and FYVE domain containing 2                                        | CCDS44414.1     | chr10_70138333-70138333_C_A   | 400D>Y  | Substitution | Nonsynonymous coding | 33% |
| MM04T | RUFY3          | RUN and FYVE domain containing 3                                        | CCDS34001.1     | chr4_71650576-71650576_G_T    | 351E>X  | Substitution | Nonsense             | 30% |
| MM04T | RUNDC1         | RUN domain containing 1                                                 | CCDS11448.1     | chr17_41139324-41139324_G_T   | 184E>X  | Substitution | Nonsense             | 29% |

|       |         |                                                                            |             |                              |         |              |                      |     |
|-------|---------|----------------------------------------------------------------------------|-------------|------------------------------|---------|--------------|----------------------|-----|
| MM04T | RUNDC3A | RUN domain containing 3A                                                   | CCDS45698.1 | chr17_42389983-42389983_C_T  | 48A>V   | Substitution | Nonsynonymous coding | 17% |
| MM04T | RUNDC3B | RUN domain containing 3B                                                   | CCDS5609.1  | chr7_87280163-87280163_C_T   | 50R>W   | Substitution | Nonsynonymous coding | 23% |
| MM04T | RUNX1T1 | runt-related transcription factor 1; translocated to, 1 (cyclin D-related) | CCDS6256.1  | chr8_92998514-92998514_G_A   | 373R>X  | Substitution | Nonsense             | 18% |
| MM04T | RUSC2   | RUN and SH3 domain containing 2                                            | CCDS35008.1 | chr9_35548205-35548205_C_T   | 563R>C  | Substitution | Nonsynonymous coding | 29% |
| MM04T | RUSC2   | RUN and SH3 domain containing 2                                            | CCDS35008.1 | chr9_35558533-35558533_C_T   | 1104R>C | Substitution | Nonsynonymous coding | 19% |
| MM04T | RUSC2   | RUN and SH3 domain containing 2                                            | CCDS35008.1 | chr9_35560815-35560815_G_A   | 1393R>Q | Substitution | Nonsynonymous coding | 35% |
| MM04T | RXFP2   | relaxin/insulin-like family peptide receptor 2                             | CCDS9342.1  | chr13_32355863-32355863_G_A  | 281D>N  | Substitution | Nonsynonymous coding | 23% |
| MM04T | RXRG    | retinoid X receptor, gamma                                                 | CCDS1248.1  | chr1_165398114-165398114_C_A | 47D>Y   | Substitution | Nonsynonymous coding | 21% |
| MM04T | RYR1    | ryanodine receptor 1 (skeletal)                                            | CCDS33011.1 | chr19_38951046-38951046_G_T  | 798E>X  | Substitution | Nonsense             | 28% |
| MM04T | RYR2    | ryanodine receptor 2 (cardiac)                                             | NM_001035   | chr1_23777638-23777638_C_T   | 1737T>I | Substitution | Nonsynonymous coding | 19% |
| MM04T | RYR2    | ryanodine receptor 2 (cardiac)                                             | NM_001035   | chr1_237787107-237787107_C_T | 1987P>S | Substitution | Nonsynonymous coding | 30% |
| MM04T | RYR2    | ryanodine receptor 2 (cardiac)                                             | NM_001035   | chr1_237841403-237841403_C_A | 2962F>L | Substitution | Nonsynonymous coding | 28% |
| MM04T | RYR3    | ryanodine receptor 3                                                       | CCDS45210.1 | chr15_33765676-33765676_C_A  | 36F>L   | Substitution | Nonsynonymous coding | 26% |
| MM04T | S100A5  | S100 calcium binding protein A5                                            | CCDS1041.1  | chr1_153509894-153509894_C_T | 71D>N   | Substitution | Nonsynonymous coding | 34% |
| MM04T | S100Z   | S100 calcium binding protein Z                                             | CCDS43333.1 | chr5_76173562-76173562_G_A   | 69E>K   | Substitution | Nonsynonymous coding | 21% |
| MM04T | SAAL1   | serum amyloid A-like 1                                                     | CCDS31439.1 | chr11_18111002-18111002_C_A  | 215E>D  | Substitution | Nonsynonymous coding | 24% |
| MM04T | SACM1L  | SAC1 suppressor of actin mutations 1-like (yeast)                          | CCDS33745.1 | chr3_45785084-45785084_A_C   | 563T>P  | Substitution | Nonsynonymous coding | 20% |
| MM04T | SACS    | spastic ataxia of Charlevoix-Saguenay (sacsin)                             | CCDS9300.2  | chr13_23904307-23904307_T_G  | 4570K>Q | Substitution | Nonsynonymous coding | 36% |
| MM04T | SACS    | spastic ataxia of Charlevoix-Saguenay (sacsin)                             | CCDS9300.2  | chr13_23905152-23905152_G_T  | 4288T>N | Substitution | Nonsynonymous coding | 25% |
| MM04T | SACS    | spastic ataxia of Charlevoix-Saguenay (sacsin)                             | CCDS9300.2  | chr13_23909485-23909485_C_T  | 2844D>N | Substitution | Nonsynonymous coding | 21% |
| MM04T | SACS    | spastic ataxia of Charlevoix-Saguenay (sacsin)                             | CCDS9300.2  | chr13_23909751-23909751_C_A  | 2755S>I | Substitution | Nonsynonymous coding | 18% |
| MM04T | SACS    | spastic ataxia of Charlevoix-Saguenay (sacsin)                             | CCDS9300.2  | chr13_23913271-23913271_C_T  | 1582D>N | Substitution | Nonsynonymous coding | 32% |
| MM04T | SAG     | S-antigen; retina and pineal gland (arrestin)                              | CCDS46545.1 | chr2_234255535-234255535_G_A | 399D>N  | Substitution | Nonsynonymous coding | 19% |
| MM04T | SALL1   | sal-like 1 (Drosophila)                                                    | CCDS10747.1 | chr16_51172696-51172696_G_A  | 1146S>L | Substitution | Nonsynonymous coding | 23% |
| MM04T | SAMD15  | sterile alpha motif domain containing 15                                   | CCDS32126.1 | chr14_77844665-77844665_A_G  | 302T>A  | Substitution | Nonsynonymous coding | 23% |
| MM04T | SAMD15  | sterile alpha motif domain containing 15                                   | CCDS32126.1 | chr14_77845256-77845256_G_T  | 499E>X  | Substitution | Nonsense             | 21% |
| MM04T | SAMD3   | sterile alpha motif domain containing 3                                    | CCDS34539.1 | chr6_130497110-130497110_C_T | 233R>Q  | Substitution | Nonsynonymous coding | 35% |
| MM04T | SAMD3   | sterile alpha motif domain containing 3                                    | CCDS34539.1 | chr6_130530683-130530683_T_G | 114N>H  | Substitution | Nonsynonymous coding | 28% |
| MM04T | SAMD5   | sterile alpha motif domain containing 5                                    | CCDS34548.1 | chr6_147830474-147830474_A_C | 137K>T  | Substitution | Nonsynonymous coding | 14% |
| MM04T | SAMD9   | sterile alpha motif domain containing 9                                    | CCDS34680.1 | chr7_92733282-92733282_T_G   | 710K>T  | Substitution | Nonsynonymous coding | 21% |
| MM04T | SAMD9L  | sterile alpha motif domain containing 9-like                               | CCDS34681.1 | chr7_92762496-92762496_G_T   | 930S>Y  | Substitution | Nonsynonymous coding | 22% |
| MM04T | SAMD9L  | sterile alpha motif domain containing 9-like                               | CCDS34681.1 | chr7_92763831-92763831_G_A   | 485S>F  | Substitution | Nonsynonymous coding | 22% |



|       |         |                                                                              |                 |                              |         |              |                      |     |
|-------|---------|------------------------------------------------------------------------------|-----------------|------------------------------|---------|--------------|----------------------|-----|
| MM04T | SAMM50  | sorting and assembly machinery component 50 homolog ( <i>S. cerevisiae</i> ) | CCDS14055.1     | chr22_44372633-44372633_G_A  | 261A>T  | Substitution | Nonsynonymous coding | 36% |
| MM04T | SAMSN1  | SAM domain, SH3 domain and nuclear localization signals 1                    | CCDS42906.1     | chr21_15872989-15872989_T_G  | 210K>T  | Substitution | Nonsynonymous coding | 25% |
| MM04T | SAMSN1  | SAM domain, SH3 domain and nuclear localization signals 1                    | CCDS42906.1     | chr21_15893509-15893509_G_A  | 31R>W   | Substitution | Nonsynonymous coding | 18% |
| MM04T | SARDH   | sarcosine dehydrogenase                                                      | CCDS6978.1      | chr9_136573504-136573504_G_A | 459R>X  | Substitution | Nonsense             | 17% |
| MM04T | SASH1   | SAM and SH3 domain containing 1                                              | CCDS5212.1      | chr6_148795275-148795275_A_C | 182I>L  | Substitution | Nonsynonymous coding | 29% |
| MM04T | SASS6   | spindle assembly 6 homolog ( <i>C. elegans</i> )                             | CCDS764.1       | chr1_100573257-100573257_T_G | 358N>T  | Substitution | Nonsynonymous coding | 36% |
| MM04T | SASS6   | spindle assembly 6 homolog ( <i>C. elegans</i> )                             | CCDS764.1       | chr1_100575922-100575922_C_A | 263D>Y  | Substitution | Nonsynonymous coding | 25% |
| MM04T | SAT1    | spermidine/spermine N1-acetyltransferase 1                                   | CCDS14207.1     | chrX_23803899-23803899_C_A   | 148L>M  | Substitution | Nonsynonymous coding | 18% |
| MM04T | SATB1   | SATB homeobox 1                                                              | CCDS2631.1      | chr3_18428081-18428081_C_T   | 410R>Q  | Substitution | Nonsynonymous coding | 30% |
| MM04T | SBDS    | Shwachman-Bodian-Diamond syndrome                                            | CCDS5537.1      | chr7_66453479-66453479_A_G   | 211L>P  | Substitution | Nonsynonymous coding | 16% |
| MM04T | SBK2    | SH3-binding domain kinase family, member 2                                   | CCDS42631.1     | chr19_56041257-56041257_G_A  | 297A>V  | Substitution | Nonsynonymous coding | 16% |
| MM04T | SCAF11  | SR-related CTD-associated factor 11                                          | CCDS8748.2      | chr12_46320342-46320342_C_T  | 1048E>K | Substitution | Nonsynonymous coding | 29% |
| MM04T | SCAF11  | SR-related CTD-associated factor 11                                          | CCDS8748.2      | chr12_46325298-46325298_C_T  | 278E>K  | Substitution | Nonsynonymous coding | 22% |
| MM04T | SCAF4   | SR-related CTD-associated factor 4                                           | CCDS33537.1     | chr21_33044070-33044070_T_G  | 1029D>A | Substitution | Nonsynonymous coding | 31% |
| MM04T | SCAF4   | SR-related CTD-associated factor 4                                           | CCDS33537.1     | chr21_33064672-33064672_T_G  | 535E>A  | Substitution | Nonsynonymous coding | 27% |
| MM04T | SCAF4   | SR-related CTD-associated factor 4                                           | CCDS33537.1     | chr21_33067122-33067122_T_G  | NA      | Substitution | Splice site donor    | 47% |
| MM04T | SCAF8   | SR-related CTD-associated factor 8                                           | CCDS5247.1      | chr6_155153171-155153171_G_A | 820V>I  | Substitution | Nonsynonymous coding | 26% |
| MM04T | SCAF8   | SR-related CTD-associated factor 8                                           | CCDS5247.1      | chr6_155148378-155148378_A_C | NA      | Substitution | Splice site donor    | 27% |
| MM04T | SCAMP1  | secretory carrier membrane protein 1                                         | ENST00000451676 | chr5_77771406-77771406_A_C   | 311K>T  | Substitution | Nonsynonymous coding | 29% |
| MM04T | SCAND3  | SCAN domain containing 3                                                     | CCDS34355.1     | chr6_28542738-28542738_G_T   | 582L>I  | Substitution | Nonsynonymous coding | 15% |
| MM04T | SCAP    | SREBF chaperone                                                              | CCDS2755.2      | chr3_47462120-47462120_C_T   | 496R>Q  | Substitution | Nonsynonymous coding | 18% |
| MM04T | SCARA5  | scavenger receptor class A, member 5 (putative)                              | CCDS6064.1      | chr8_27737093-27737093_G_T   | 448F>L  | Substitution | Nonsynonymous coding | 21% |
| MM04T | SCCPDH  | saccharopine dehydrogenase (putative)                                        | CCDS31084.1     | chr1_246921655-246921655_G_T | 231R>I  | Substitution | Nonsynonymous coding | 26% |
| MM04T | SCEL    | sciellin                                                                     | CCDS9459.1      | chr13_78176806-78176806_C_T  | 332S>F  | Substitution | Nonsynonymous coding | 25% |
| MM04T | SCG2    | secretogranin II                                                             | CCDS2457.1      | chr2_224462560-224462560_C_A | 481A>S  | Substitution | Nonsynonymous coding | 25% |
| MM04T | SCGB1D1 | secretoglobin, family 1D, member 1                                           | CCDS8015.1      | chr11_61959570-61959570_G_A  | 33G>D   | Substitution | Nonsynonymous coding | 34% |
| MM04T | SCGB1D1 | secretoglobin, family 1D, member 1                                           | CCDS8015.1      | chr11_61959698-61959698_C_A  | 76L>I   | Substitution | Nonsynonymous coding | 21% |
| MM04T | SCGB1D4 | secretoglobin, family 1D, member 4                                           | CCDS31583.1     | chr11_62065064-62065064_G_A  | 41A>V   | Substitution | Nonsynonymous coding | 36% |
| MM04T | SCLT1   | sodium channel and clathrin linker 1                                         | CCDS3740.1      | chr4_129878248-129878248_T_C | 360D>G  | Substitution | Nonsynonymous coding | 39% |
| MM04T | SCML1   | sex comb on midleg-like 1 ( <i>Drosophila</i> )                              | CCDS35210.1     | chrX_17768103-17768103_C_A   | 131F>L  | Substitution | Nonsynonymous coding | 33% |
| MM04T | SCML2   | sex comb on midleg-like 2 ( <i>Drosophila</i> )                              | CCDS14185.1     | chrX_18259388-18259388_C_A   | 696E>X  | Substitution | Nonsense             | 33% |
| MM04T | SCN10A  | sodium channel, voltage-gated, type X, alpha subunit                         | CCDS33736.1     | chr3_38738884-38738884_C_A   | 1943E>X | Substitution | Nonsense             | 28% |

|       |           |                                                        |                 |                              |         |              |                      |     |
|-------|-----------|--------------------------------------------------------|-----------------|------------------------------|---------|--------------|----------------------|-----|
| MM04T | SCN10A    | sodium channel, voltage-gated, type X, alpha subunit   | CCDS33736.1     | chr3_38743480-38743480_C_A   | 1503E>X | Substitution | Nonsense             | 28% |
| MM04T | SCN11A    | sodium channel, voltage-gated, type XI, alpha subunit  | CCDS33737.1     | chr3_38889102-38889102_G_T   | 1487L>I | Substitution | Nonsynonymous coding | 29% |
| MM04T | SCN11A    | sodium channel, voltage-gated, type XI, alpha subunit  | CCDS33737.1     | chr3_38945472-38945472_C_T   | 576D>N  | Substitution | Nonsynonymous coding | 16% |
| MM04T | SCN1B     | sodium channel, voltage-gated, type I, beta subunit    | CCDS46047.1     | chr19_35523506-35523506_C_A  | 39L>I   | Substitution | Nonsynonymous coding | 29% |
| MM04T | SCN2A     | sodium channel, voltage-gated, type II, alpha subunit  | CCDS33313.1     | chr2_166245943-166245943_G_A | 1876R>Q | Substitution | Nonsynonymous coding | 23% |
| MM04T | SCN3A     | sodium channel, voltage-gated, type III, alpha subunit | CCDS33312.1     | chr2_165946813-165946813_A_C | 1950N>K | Substitution | Nonsynonymous coding | 47% |
| MM04T | SCN4A     | sodium channel, voltage-gated, type IV, alpha subunit  | CCDS45761.1     | chr17_62019110-62019110_G_A  | 1511S>L | Substitution | Nonsynonymous coding | 20% |
| MM04T | SCN4A     | sodium channel, voltage-gated, type IV, alpha subunit  | CCDS45761.1     | chr17_62034853-62034853_G_A  | 682S>L  | Substitution | Nonsynonymous coding | 30% |
| MM04T | SCN5A     | sodium channel, voltage-gated, type V, alpha subunit   | CCDS46796.1     | chr3_38628908-38628908_G_T   | 807L>M  | Substitution | Nonsynonymous coding | 23% |
| MM04T | SCN5A     | sodium channel, voltage-gated, type V, alpha subunit   | CCDS46796.1     | chr3_38646368-38646368_G_T   | 457S>Y  | Substitution | Nonsynonymous coding | 18% |
| MM04T | SCN5A     | sodium channel, voltage-gated, type V, alpha subunit   | CCDS46796.1     | chr3_38663915-38663915_G_T   | 153P>H  | Substitution | Nonsynonymous coding | 21% |
| MM04T | SCN7A     | sodium channel, voltage-gated, type VII, alpha subunit | CCDS46442.1     | chr2_167289066-167289066_T_C | 785Y>C  | Substitution | Nonsynonymous coding | 25% |
| MM04T | SCN7A     | sodium channel, voltage-gated, type VII, alpha subunit | CCDS46442.1     | chr2_167289247-167289247_G_T | 725L>M  | Substitution | Nonsynonymous coding | 19% |
| MM04T | SCN7A     | sodium channel, voltage-gated, type VII, alpha subunit | CCDS46442.1     | chr2_167313475-167313475_C_A | 399E>X  | Substitution | Nonsense             | 16% |
| MM04T | SCN9A     | sodium channel, voltage-gated, type IX, alpha subunit  | CCDS46441.1     | chr2_167168182-167168182_C_T | 29E>K   | Substitution | Nonsynonymous coding | 28% |
| MM04T | SCN9A     | sodium channel, voltage-gated, type IX, alpha subunit  | CCDS46441.1     | chr2_167168211-167168211_G_T | 19S>Y   | Substitution | Nonsynonymous coding | 22% |
| MM04T | SCNN1B    | sodium channel, non-voltage-gated 1, beta subunit      | CCDS10609.1     | chr16_23391473-23391473_G_T  | 509E>X  | Substitution | Nonsense             | 17% |
| MM04T | SCNN1G    | sodium channel, non-voltage-gated 1, gamma subunit     | CCDS10608.1     | chr16_23224023-23224023_G_A  | 440R>Q  | Substitution | Nonsynonymous coding | 18% |
| MM04T | SCRN1     | secernin 1                                             | CCDS47567.1     | chr7_29963582-29963582_G_T   | 432F>L  | Substitution | Nonsynonymous coding | 27% |
| MM04T | SCUBE1    | signal peptide, CUB domain, EGF-like 1                 | CCDS14048.1     | chr22_43610257-43610257_A_C  | 631V>G  | Substitution | Nonsynonymous coding | 17% |
| MM04T | SCUBE1    | signal peptide, CUB domain, EGF-like 1                 | CCDS14048.1     | chr22_43614370-43614370_G_T  | 594F>L  | Substitution | Nonsynonymous coding | 22% |
| MM04T | SCUBE3    | signal peptide, CUB domain, EGF-like 3                 | CCDS4800.1      | chr6_35210053-35210053_G_A   | 497R>Q  | Substitution | Nonsynonymous coding | 19% |
| MM04T | SEBOX     | SEBOX homeobox                                         | CCDS11229.1     | chr17_26694479-26694479_G_A  | 450R>C  | Substitution | Nonsynonymous coding | 16% |
| MM04T | SEC14L1   | SEC14-like 1 ( <i>S. cerevisiae</i> )                  | CCDS42385.1     | chr17_75202817-75202817_C_T  | 450P>L  | Substitution | Nonsynonymous coding | 26% |
| MM04T | SEC14L4   | SEC14-like 4 ( <i>S. cerevisiae</i> )                  | CCDS13878.1     | chr22_30886146-30886146_G_T  | 390S>Y  | Substitution | Nonsynonymous coding | 26% |
| MM04T | SEC14L4   | SEC14-like 4 ( <i>S. cerevisiae</i> )                  | CCDS13878.1     | chr22_30887605-30887605_T_C  | 346M>V  | Substitution | Nonsynonymous coding | 31% |
| MM04T | SEC61A1   | Sec61 alpha 1 subunit ( <i>S. cerevisiae</i> )         | CCDS3046.1      | chr3_127783794-127783794_C_T | 231R>W  | Substitution | Nonsynonymous coding | 24% |
| MM04T | SEC63     | SEC63 homolog ( <i>S. cerevisiae</i> )                 | CCDS5061.1      | chr6_108227773-108227773_T_G | 280E>D  | Substitution | Nonsynonymous coding | 29% |
| MM04T | SEC63     | SEC63 homolog ( <i>S. cerevisiae</i> )                 | CCDS5061.1      | chr6_108246033-108246033_T_G | 110N>H  | Substitution | Nonsynonymous coding | 38% |
| MM04T | SEC63     | SEC63 homolog ( <i>S. cerevisiae</i> )                 | CCDS5061.1      | chr6_108250710-108250710_G_A | 45R>X   | Substitution | Nonsense             | 35% |
| MM04T | SECISBP2L | SECIS binding protein 2-like                           | ENST00000380927 | chr15_49311644-49311644_C_T  | 381D>N  | Substitution | Nonsynonymous coding | 40% |
| MM04T | SEL1L     | sel-1 suppressor of lin-12-like ( <i>C. elegans</i> )  | CCDS9876.1      | chr14_81972537-81972537_G_T  | 130P>H  | Substitution | Nonsynonymous coding | 27% |

|       |          |                                                                                        |                 |                              |         |              |                      |     |
|-------|----------|----------------------------------------------------------------------------------------|-----------------|------------------------------|---------|--------------|----------------------|-----|
| MM04T | SEL1L3   | sel-1 suppressor of lin-12-like 3 (C. elegans)                                         | CCDS47037.1     | chr4_25834646-25834646_G_A   | 357R>X  | Substitution | Nonsense             | 22% |
| MM04T | SELENBP1 | selenium binding protein 1                                                             | CCDS5995.1      | chr1_151338253-151338253_C_T | 305E>K  | Substitution | Nonsynonymous coding | 27% |
| MM04T | SELRC1   | Sel1 repeat containing 1                                                               | CCDS5570.1      | chr1_53158480-53158480_T_C   | 56K>E   | Substitution | Nonsynonymous coding | 41% |
| MM04T | SEMA3A   | sema domain, immunoglobulin domain (Ig), short basic domain, secreted, (semaphorin) 3A | CCDS5599.1      | chr7_83764206-83764206_A_T   | 58H>Q   | Substitution | Nonsynonymous coding | 10% |
| MM04T | SEMA3C   | sema domain, immunoglobulin domain (Ig), short basic domain, secreted, (semaphorin) 3C | CCDS5596.1      | chr7_80457917-80457917_C_A   | 83S>I   | Substitution | Nonsynonymous coding | 28% |
| MM04T | SEMA3G   | sema domain, immunoglobulin domain (Ig), short basic domain, secreted, (semaphorin) 3G | CCDS2856.1      | chr3_52469816-52469816_T_C   | 718N>D  | Substitution | Nonsynonymous coding | 38% |
| MM04T | SEMA5B   | sema domain, seven thrombospondin repeats (type 1 and type 1-like), transmembrane      | CCDS35491.1     | chr3_122632466-122632466_C_T | 732S>N  | Substitution | Nonsynonymous coding | 21% |
| MM04T | SEMA6A   | sema domain, transmembrane domain (TM), and cytoplasmic domain, (semaphorin) 6A        | CCDS47256.1     | chr5_115840552-115840552_G_A | 30S>L   | Substitution | Nonsynonymous coding | 28% |
| MM04T | SEMA6C   | sema domain, transmembrane domain (TM), and cytoplasmic domain, (semaphorin) 6C        | CCDS984.1       | chr1_151104982-151104982_T_C | 924N>S  | Substitution | Nonsynonymous coding | 40% |
| MM04T | SEPHS2   | selenophosphate synthetase 2                                                           | ENST00000418751 | chr16_30456632-30456632_G_T  | 21F>L   | Substitution | Nonsynonymous coding | 31% |
| MM04T | SERINC5  | serine incorporator 5                                                                  | NM_178276       | chr5_79473787-79473787_C_T   | 99A>T   | Substitution | Nonsynonymous coding | 20% |
| MM04T | SERPINA6 | serpin peptidase inhibitor, clade A (alpha-1 antitrypsin, antitrypsin), member 6       | CCDS9924.1      | chr14_94780532-94780532_C_A  | 152E>X  | Substitution | Nonsense             | 24% |
| MM04T | SERPINB5 | serpin peptidase inhibitor, clade B (ovalbumin), member 5                              | CCDS32839.1     | chr18_61170754-61170754_G_T  | 309E>D  | Substitution | Nonsynonymous coding | 31% |
| MM04T | SERPINB6 | serpin peptidase inhibitor, clade B (ovalbumin), member 6                              | CCDS4479.1      | chr6_2953355-2953355_C_A     | 166A>S  | Substitution | Nonsynonymous coding | 19% |
| MM04T | SERPINB7 | serpin peptidase inhibitor, clade B (ovalbumin), member 7                              | CCDS11988.1     | chr18_61463524-61463524_T_G  | 121L>V  | Substitution | Nonsynonymous coding | 34% |
| MM04T | SERPINB7 | serpin peptidase inhibitor, clade B (ovalbumin), member 7                              | CCDS11988.1     | chr18_61471552-61471552_T_G  | 276F>V  | Substitution | Nonsynonymous coding | 29% |
| MM04T | SERPINB8 | serpin peptidase inhibitor, clade B (ovalbumin), member 8                              | CCDS11991.1     | chr18_61650848-61650848_G_A  | 154D>N  | Substitution | Nonsynonymous coding | 26% |
| MM04T | SERPINB8 | serpin peptidase inhibitor, clade B (ovalbumin), member 8                              | CCDS11991.1     | chr18_61652468-61652468_G_A  | 237D>N  | Substitution | Nonsynonymous coding | 16% |
| MM04T | SERPINE3 | serpin peptidase inhibitor, clade E (nexin, plasminogen activator inhibitor type 1),   | NM_001101320    | chr13_51922447-51922447_G_T  | 267D>Y  | Substitution | Nonsynonymous coding | 31% |
| MM04T | SESN1    | sestrin 1                                                                              | CCDS5070.1      | chr6_109311999-109311999_G_A | 425R>C  | Substitution | Nonsynonymous coding | 38% |
| MM04T | SETD1A   | SET domain containing 1A                                                               | CCDS32435.1     | chr16_30982716-30982716_G_A  | 1012D>N | Substitution | Nonsynonymous coding | 37% |
| MM04T | SETD2    | SET domain containing 2                                                                | CCDS2749.2      | chr3_47098523-47098523_C_A   | 2251D>Y | Substitution | Nonsynonymous coding | 20% |
| MM04T | SETD2    | SET domain containing 2                                                                | CCDS2749.2      | chr3_47098631-47098631_C_T   | 2215E>K | Substitution | Nonsynonymous coding | 28% |
| MM04T | SETD2    | SET domain containing 2                                                                | CCDS2749.2      | chr3_47163667-47163667_G_T   | 820S>Y  | Substitution | Nonsynonymous coding | 42% |
| MM04T | SETD2    | SET domain containing 2                                                                | CCDS2749.2      | chr3_47163941-47163941_C_A   | 729E>X  | Substitution | Nonsense             | 28% |
| MM04T | SETD3    | SET domain containing 3                                                                | CCDS9951.1      | chr14_99925516-99925516_C_A  | 118E>X  | Substitution | Nonsense             | 34% |
| MM04T | SETD5    | SET domain containing 5                                                                | ENST00000421188 | chr3_9510257-9510257_G_A     | 238R>Q  | Substitution | Nonsynonymous coding | 28% |
| MM04T | SETD5    | SET domain containing 5                                                                | CCDS46741.1     | chr3_9517339-9517339_C_T     | 1298S>F | Substitution | Nonsynonymous coding | 21% |
| MM04T | SETDB1   | SET domain, bifurcated 1                                                               | CCDS44217.1     | chr1_150923391-150923391_T_G | 680L>V  | Substitution | Nonsynonymous coding | 32% |
| MM04T | SETX     | senataxin                                                                              | CCDS6947.1      | chr9_135203690-135203690_C_T | 1099D>N | Substitution | Nonsynonymous coding | 30% |
| MM04T | SETX     | senataxin                                                                              | CCDS6947.1      | chr9_135204164-135204164_C_A | 941E>X  | Substitution | Nonsense             | 28% |
| MM04T | SF1      | splicing factor 1                                                                      | CCDS31599.1     | chr11_64535714-64535714_T_G  | 311K>T  | Substitution | Nonsynonymous coding | 23% |

|       |          |                                                                                |                 |                               |        |              |                      |     |
|-------|----------|--------------------------------------------------------------------------------|-----------------|-------------------------------|--------|--------------|----------------------|-----|
| MM04T | SF3A1    | splicing factor 3a, subunit 1, 120kDa                                          | CCDS13875.1     | chr22_30736338-30736338_C_A   | 408D>Y | Substitution | Nonsynonymous coding | 34% |
| MM04T | SF3B1    | splicing factor 3b, subunit 1, 155kDa                                          | CCDS33356.1     | chr2_198285764-198285764_A_G  | 97S>P  | Substitution | Nonsynonymous coding | 34% |
| MM04T | SFPQ     | splicing factor proline/glutamine-rich                                         | CCDS388.1       | chr1_35652831-35652831_C_T    | 613G>S | Substitution | Nonsynonymous coding | 35% |
| MM04T | SFTPA1   | surfactant protein A1                                                          | CCDS44445.1     | chr10_81372088-81372088_G_T   | 65E>X  | Substitution | Nonsense             | 35% |
| MM04T | SFTPD    | surfactant protein D                                                           | CCDS7362.1      | chr10_81697815-81697815_C_A   | 307K>N | Substitution | Nonsynonymous coding | 16% |
| MM04T | SGCG     | sarcoglycan, gamma (35kDa dystrophin-associated glycoprotein)                  | CCDS9299.1      | chr13_23777928-23777928_G_T   | 32R>I  | Substitution | Nonsynonymous coding | 16% |
| MM04T | SGCG     | sarcoglycan, gamma (35kDa dystrophin-associated glycoprotein)                  | CCDS9299.1      | chr13_23894851-23894851_T_G   | 218I>M | Substitution | Nonsynonymous coding | 38% |
| MM04T | SGIP1    | SH3-domain GRB2-like (endophilin) interacting protein 1                        | ENST00000237247 | chr1_67099823-67099823_G_A    | 54A>T  | Substitution | Nonsynonymous coding | 19% |
| MM04T | SGIP1    | SH3-domain GRB2-like (endophilin) interacting protein 1                        | ENST00000371039 | chr1_67160169-67160169_C_T    | 341R>C | Substitution | Nonsynonymous coding | 28% |
| MM04T | SGK110   | putative uncharacterized serine/threonine-protein kinase SgK110 [Source:RefSeq | ENST00000429736 | chr19_56052745-56052745_C_A   | 183D>Y | Substitution | Nonsynonymous coding | 23% |
| MM04T | SGPL1    | sphingosine-1-phosphate lyase 1                                                | CCDS31216.1     | chr10_72628151-72628151_G_A   | 222R>Q | Substitution | Nonsynonymous coding | 25% |
| MM04T | SGSM1    | small G protein signaling modulator 1                                          | CCDS46674.1     | chr22_25294076-25294076_C_A   | 775F>L | Substitution | Nonsynonymous coding | 19% |
| MM04T | SGSM2    | small G protein signaling modulator 2                                          | CCDS32526.1     | chr17_2267414-2267414_C_A     | 290T>N | Substitution | Nonsynonymous coding | 31% |
| MM04T | SH2D1A   | SH2 domain containing 1A                                                       | CCDS14608.1     | chrX_123504164-123504164_A_G  | 114T>A | Substitution | Nonsynonymous coding | 35% |
| MM04T | SH2D3C   | SH2 domain containing 3C                                                       | CCDS6877.1      | chr9_130507114-130507114_G_A  | 510A>V | Substitution | Nonsynonymous coding | 20% |
| MM04T | SH2D4A   | SH2 domain containing 4A                                                       | CCDS6009.1      | chr8_19231137-19231137_G_T    | 338Q>H | Substitution | Nonsynonymous coding | 29% |
| MM04T | SH2D4A   | SH2 domain containing 4A                                                       | CCDS6009.1      | chr8_19231040-19231040_G_T    | NA     | Substitution | Splice site acceptor | 29% |
| MM04T | SH2D7    | SH2 domain containing 7                                                        | CCDS45315.1     | chr15_78390312-78390312_G_A   | 103R>Q | Substitution | Nonsynonymous coding | 30% |
| MM04T | SH3BP5   | SH3-domain binding protein 5 (BTK-associated)                                  | CCDS2625.2      | chr3_15298407-15298407_C_T    | 368R>Q | Substitution | Nonsynonymous coding | 39% |
| MM04T | SH3D21   | SH3 domain containing 21                                                       | NM_001162530    | chr1_36772798-36772798_G_T    | 86R>I  | Substitution | Nonsynonymous coding | 28% |
| MM04T | SH3GL3   | SH3-domain GRB2-like 3                                                         | CCDS10325.2     | chr15_84286902-84286902_G_T   | 303E>X | Substitution | Nonsense             | 24% |
| MM04T | SH3GLB2  | SH3-domain GRB2-like endophilin B2                                             | CCDS6916.1      | chr9_131784604-131784604_C_A  | 54E>D  | Substitution | Nonsynonymous coding | 30% |
| MM04T | SH3PXD2A | SH3 and PX domains 2A                                                          | ENST00000369774 | chr10_105382229-105382229_C_T | 267R>Q | Substitution | Nonsynonymous coding | 28% |
| MM04T | SH3TC2   | SH3 domain and tetrapeptide repeats 2                                          | CCDS4293.1      | chr5_148406657-148406657_C_T  | 880A>T | Substitution | Nonsynonymous coding | 19% |
| MM04T | SH3YL1   | SH3 domain containing, Ysc84-like 1 (S. cerevisiae)                            | CCDS42646.1     | chr2_218858-218858_G_A        | 232R>X | Substitution | Nonsense             | 14% |
| MM04T | SHANK1   | SH3 and multiple ankyrin repeat domains 1                                      | CCDS12799.1     | chr19_51175280-51175280_G_T   | 890S>Y | Substitution | Nonsynonymous coding | 11% |
| MM04T | SHC2     | SHC (Src homology 2 domain containing) transforming protein 2                  | CCDS45891.1     | chr19_438791-438791_C_T       | 216R>H | Substitution | Nonsynonymous coding | 15% |
| MM04T | SHC4     | SHC (Src homology 2 domain containing) family, member 4                        | CCDS10130.1     | chr15_49217091-49217091_C_A   | 214R>I | Substitution | Nonsynonymous coding | 27% |
| MM04T | SHKBP1   | SH3KBP1 binding protein 1                                                      | CCDS12560.1     | chr19_41084099-41084099_C_A   | 100F>L | Substitution | Nonsynonymous coding | 32% |
| MM04T | SHPRH    | SNF2 histone linker PHD RING helicase, E3 ubiquitin protein ligase             | CCDS43513.1     | chr6_146268712-146268712_G_T  | 377L>I | Substitution | Nonsynonymous coding | 25% |
| MM04T | SHPRH    | SNF2 histone linker PHD RING helicase, E3 ubiquitin protein ligase             | CCDS43513.1     | chr6_146276148-146276148_G_A  | 104S>F | Substitution | Nonsynonymous coding | 42% |
| MM04T | SHROOM2  | shroom family member 2                                                         | CCDS14135.1     | chrX_9866242-9866242_G_A      | 935E>K | Substitution | Nonsynonymous coding | 32% |

|       |          |                                                                                                               |                 |                               |         |              |                      |     |
|-------|----------|---------------------------------------------------------------------------------------------------------------|-----------------|-------------------------------|---------|--------------|----------------------|-----|
| MM04T | SHROOM3  | shroom family member 3                                                                                        | CCDS3579.2      | chr4_77662204-77662204_C_T    | 960R>W  | Substitution | Nonsynonymous coding | 36% |
| MM04T | SHROOM4  | shroom family member 4                                                                                        | CCDS35277.1     | chrX_50377340-50377340_G_A    | 578S>L  | Substitution | Nonsynonymous coding | 33% |
| MM04T | SI       | sucrase-isomaltase (alpha-glucosidase)                                                                        | CCDS3196.1      | chr3_164767021-164767021_T_C  | 537K>E  | Substitution | Nonsynonymous coding | 29% |
| MM04T | SI       | sucrase-isomaltase (alpha-glucosidase)                                                                        | CCDS3196.1      | chr3_164700787-164700787_T_A  | NA      | Substitution | Splice site donor    | 30% |
| MM04T | SIAH3    | siah E3 ubiquitin protein ligase family member 3                                                              | CCDS41883.1     | chr13_46358026-46358026_G_A   | 101P>L  | Substitution | Nonsynonymous coding | 34% |
| MM04T | SIGLEC12 | sialic acid binding Ig-like lectin 12 (gene/pseudogene)                                                       | CCDS12833.1     | chr19_52003244-52003244_G_T   | 246Y>X  | Substitution | Nonsense             | 34% |
| MM04T | SIGLEC14 | sialic acid binding Ig-like lectin 14                                                                         | CCDS42604.1     | chr19_52147129-52147129_C_A   | 305E>D  | Substitution | Nonsynonymous coding | 18% |
| MM04T | SIK3     | SIK family kinase 3                                                                                           | CCDS8379.1      | chr11_116732585-116732585_G_A | 657P>S  | Substitution | Nonsynonymous coding | 28% |
| MM04T | SIM1     | single-minded homolog 1 (Drosophila)                                                                          | CCDS5045.1      | chr6_100838268-100838268_C_A  | 757G>V  | Substitution | Nonsynonymous coding | 23% |
| MM04T | SIN3A    | SIN3 transcription regulator homolog A (yeast)                                                                | CCDS10279.1     | chr15_75699454-75699454_G_T   | 450S>Y  | Substitution | Nonsynonymous coding | 18% |
| MM04T | SIN3B    | SIN3 transcription regulator homolog B (yeast)                                                                | CCDS32946.1     | chr19_16952581-16952581_G_T   | 128E>D  | Substitution | Nonsynonymous coding | 25% |
| MM04T | SIPA1    | signal-induced proliferation-associated 1                                                                     | CCDS8108.1      | chr11_65413719-65413719_G_A   | 431D>N  | Substitution | Nonsynonymous coding | 34% |
| MM04T | SIPA1    | signal-induced proliferation-associated 1                                                                     | CCDS8108.1      | chr11_65408999-65408999_C_T   | 203R>X  | Substitution | Nonsense             | 20% |
| MM04T | SIPA1L1  | signal-induced proliferation-associated 1 like 1                                                              | CCDS9807.1      | chr14_72117181-72117181_C_T   | 650R>W  | Substitution | Nonsynonymous coding | 23% |
| MM04T | SIPA1L2  | signal-induced proliferation-associated 1 like 2                                                              | CCDS41474.1     | chr1_232615429-232615429_C_T  | 677E>K  | Substitution | Nonsynonymous coding | 39% |
| MM04T | SIRT1    | sirtuin 1                                                                                                     | CCDS7273.1      | chr10_69667863-69667863_G_A   | 384R>Q  | Substitution | Nonsynonymous coding | 28% |
| MM04T | SIX3     | SIX homeobox 3                                                                                                | CCDS1821.1      | chr2_45169658-45169658_G_A    | 139A>T  | Substitution | Nonsynonymous coding | 38% |
| MM04T | SKIDA1   | SKI/DACH domain containing 1                                                                                  | CCDS44363.1     | chr10_21804695-21804695_T_G   | 686K>T  | Substitution | Nonsynonymous coding | 33% |
| MM04T | SKIDA1   | SKI/DACH domain containing 1                                                                                  | CCDS44363.1     | chr10_21805096-21805096_C_A   | 552E>D  | Substitution | Nonsynonymous coding | 34% |
| MM04T | SKIL     | SKI-like oncogene                                                                                             | CCDS33890.1     | chr3_170078648-170078648_G_T  | 177E>X  | Substitution | Nonsense             | 30% |
| MM04T | SKOR2    | SKI family transcriptional corepressor 2                                                                      | ENST00000425639 | chr18_44775120-44775120_G_T   | 145F>L  | Substitution | Nonsynonymous coding | 29% |
| MM04T | SLA      | Src-like-adaptor                                                                                              | CCDS47923.1     | chr8_134060122-134060122_T_C  | 142D>G  | Substitution | Nonsynonymous coding | 30% |
| MM04T | SLAIN1   | SLAIN motif family, member 1                                                                                  | CCDS31995.1     | chr13_78335026-78335026_G_A   | 252R>Q  | Substitution | Nonsynonymous coding | 32% |
| MM04T | SLAMF1   | signaling lymphocytic activation molecule family member 1                                                     | CCDS1207.1      | chr1_160607157-160607157_G_T  | 80S>Y   | Substitution | Nonsynonymous coding | 20% |
| MM04T | SLBP     | stem-loop binding protein                                                                                     | CCDS3350.1      | chr4_1701772-1701772_C_A      | 103D>Y  | Substitution | Nonsynonymous coding | 25% |
| MM04T | SLC12A1  | solute carrier family 12 (sodium/potassium/chloride transporters), solute carrier family 12                   | CCDS10129.2     | chr15_48541810-48541810_T_A   | 575F>I  | Substitution | Nonsynonymous coding | 23% |
| MM04T | SLC12A1  | (sodium/potassium/chloride transporters), solute carrier family 12                                            | CCDS10129.2     | chr15_48593563-48593563_G_T   | 1050A>S | Substitution | Nonsynonymous coding | 26% |
| MM04T | SLC12A2  | (sodium/potassium/chloride transporters), solute carrier family 12                                            | CCDS4144.1      | chr5_127516587-127516587_T_C  | 1038L>S | Substitution | Nonsynonymous coding | 32% |
| MM04T | SLC12A5  | (sodium/potassium/chloride transporters), solute carrier family 12 (potassium/chloride transporter), member 5 | CCDS46610.1     | chr20_44684896-44684896_G_T   | 988E>D  | Substitution | Nonsynonymous coding | 30% |
| MM04T | SLC12A6  | solute carrier family 12 (potassium/chloride transporters), member 6                                          | CCDS42011.1     | chr15_34628815-34628815_C_T   | 14D>N   | Substitution | Nonsynonymous coding | 24% |
| MM04T | SLC12A7  | solute carrier family 12 (potassium/chloride transporters), member 7                                          | CCDS34129.1     | chr5_1060557-1060557_C_A      | 917D>Y  | Substitution | Nonsynonymous coding | 29% |
| MM04T | SLC12A7  | solute carrier family 12 (potassium/chloride transporters), member 7                                          | CCDS34129.1     | chr5_1077994-1077994_C_T      | 528R>H  | Substitution | Nonsynonymous coding | 23% |

|       |          |                                                                                               |                 |                               |        |              |                      |     |
|-------|----------|-----------------------------------------------------------------------------------------------|-----------------|-------------------------------|--------|--------------|----------------------|-----|
| MM04T | SLC15A1  | solute carrier family 15 (oligopeptide transporter), member 1                                 | CCDS9489.1      | chr13_99337070-99337070_C_T   | 679E>K | Substitution | Nonsynonymous coding | 24% |
| MM04T | SLC15A1  | solute carrier family 15 (oligopeptide transporter), member 1                                 | ENST00000376494 | chr13_99373370-99373370_G_T   | 280S>Y | Substitution | Nonsynonymous coding | 30% |
| MM04T | SLC15A5  | solute carrier family 15, member 5                                                            | ENST00000344941 | chr12_16410689-16410689_C_T   | 234A>T | Substitution | Nonsynonymous coding | 33% |
| MM04T | SLC16A4  | solute carrier family 16, member 4 (monocarboxylic acid transporter 5)                        | CCDS823.1       | chr1_110921789-110921789_T_C  | 239D>G | Substitution | Nonsynonymous coding | 35% |
| MM04T | SLC16A9  | solute carrier family 16, member 9 (monocarboxylic acid transporter 9)                        | CCDS7256.1      | chr10_61424014-61424014_C_T   | 136R>Q | Substitution | Nonsynonymous coding | 27% |
| MM04T | SLC17A1  | solute carrier family 17 (sodium phosphate), member 1                                         | CCDS4565.1      | chr6_25813426-25813426_G_A    | 211A>V | Substitution | Nonsynonymous coding | 21% |
| MM04T | SLC17A2  | solute carrier family 17 (sodium phosphate), member 2                                         | CCDS4567.1      | chr6_25916044-25916044_A_G    | 328L>S | Substitution | Nonsynonymous coding | 26% |
| MM04T | SLC17A2  | solute carrier family 17 (sodium phosphate), member 2                                         | CCDS4567.1      | chr6_25924138-25924138_G_T    | NA     | Substitution | Splice site acceptor | 41% |
| MM04T | SLC17A3  | solute carrier family 17 (sodium phosphate), member 3                                         | CCDS47385.1     | chr6_25850279-25850279_A_C    | 374L>V | Substitution | Nonsynonymous coding | 24% |
| MM04T | SLC17A6  | solute carrier family 17 (sodium-dependent inorganic phosphate cotransporter), member 6       | CCDS7856.1      | chr11_22396395-22396395_T_G   | 379L>R | Substitution | Nonsynonymous coding | 35% |
| MM04T | SLC18A1  | solute carrier family 18 (vesicular monoamine), member 1                                      | CCDS6013.1      | chr8_20022397-20022397_G_A    | 333S>F | Substitution | Nonsynonymous coding | 36% |
| MM04T | SLC18A1  | solute carrier family 18 (vesicular monoamine), member 1                                      | CCDS6013.1      | chr8_20022617-20022617_C_T    | 287S>N | Substitution | Nonsynonymous coding | 26% |
| MM04T | SLC18A1  | solute carrier family 18 (vesicular monoamine), member 1                                      | CCDS6013.1      | chr8_20031905-20031905_G_T    | 200Q>K | Substitution | Nonsynonymous coding | 27% |
| MM04T | SLC18A1  | solute carrier family 18 (vesicular monoamine), member 1                                      | CCDS6013.1      | chr8_20036715-20036715_C_A    | 135E>D | Substitution | Nonsynonymous coding | 31% |
| MM04T | SLC18A1  | solute carrier family 18 (vesicular monoamine), member 1                                      | CCDS6013.1      | chr8_20036941-20036941_G_T    | 60S>Y  | Substitution | Nonsynonymous coding | 16% |
| MM04T | SLC18A2  | solute carrier family 18 (vesicular monoamine), member 2                                      | CCDS7599.1      | chr10_119003781-119003781_G_A | 141V>I | Substitution | Nonsynonymous coding | 22% |
| MM04T | SLC19A1  | solute carrier family 19 (folate transporter), member 1                                       | CCDS13725.1     | chr21_46945809-46945809_G_T   | 405F>L | Substitution | Nonsynonymous coding | 28% |
| MM04T | SLC19A3  | solute carrier family 19, member 3                                                            | CCDS2468.1      | chr2_228564031-228564031_C_T  | 134E>K | Substitution | Nonsynonymous coding | 18% |
| MM04T | SLC19A3  | solute carrier family 19, member 3                                                            | CCDS2468.1      | chr2_228564208-228564208_C_T  | 75D>N  | Substitution | Nonsynonymous coding | 22% |
| MM04T | SLC1A1   | solute carrier family 1 (neuronal/epithelial high affinity glutamate transporter, system Xag) | CCDS6452.1      | chr9_4576026-4576026_C_A      | 301L>I | Substitution | Nonsynonymous coding | 16% |
| MM04T | SLC1A3   | solute carrier family 1 (glial high affinity glutamate transporter), member 3                 | CCDS3919.1      | chr5_36676998-36676998_A_C    | 191K>T | Substitution | Nonsynonymous coding | 44% |
| MM04T | SLC1A6   | solute carrier family 1 (high affinity aspartate/glutamate transporter), member 6             | CCDS12321.1     | chr19_15083562-15083562_C_T   | 54R>H  | Substitution | Nonsynonymous coding | 28% |
| MM04T | SLC20A1  | solute carrier family 20 (phosphate transporter), member 1                                    | CCDS2099.1      | chr2_113416967-113416967_T_A  | 412L>X | Substitution | Nonsense             | 23% |
| MM04T | SLC22A10 | solute carrier family 22, member 10                                                           | CCDS41661.1     | chr11_63067096-63067096_T_A   | 355F>L | Substitution | Nonsynonymous coding | 24% |
| MM04T | SLC22A10 | solute carrier family 22, member 10                                                           | CCDS41661.1     | chr11_63078489-63078489_C_A   | 537L>I | Substitution | Nonsynonymous coding | 39% |
| MM04T | SLC22A15 | solute carrier family 22, member 15                                                           | CCDS44198.1     | chr1_116534775-116534775_G_A  | 71A>T  | Substitution | Nonsynonymous coding | 22% |
| MM04T | SLC22A15 | solute carrier family 22, member 15                                                           | CCDS44198.1     | chr1_116574156-116574156_C_T  | 300R>C | Substitution | Nonsynonymous coding | 18% |
| MM04T | SLC22A16 | solute carrier family 22 (organic cation/carnitine transporter), member 16                    | CCDS5084.1      | chr6_110746104-110746104_G_A  | 569T>I | Substitution | Nonsynonymous coding | 25% |
| MM04T | SLC22A20 | solute carrier family 22, member 20                                                           | NM_001004326    | chr11_65000815-65000815_C_T   | 413A>V | Substitution | Nonsynonymous coding | 36% |
| MM04T | SLC22A24 | solute carrier family 22, member 24                                                           | ENST00000417740 | chr11_62902206-62902206_G_T   | 146S>X | Substitution | Nonsense             | 34% |
| MM04T | SLC22A3  | solute carrier family 22 (extraneuronal monoamine transporter), member 3                      | CCDS5277.1      | chr6_160857854-160857854_G_A  | 340D>N | Substitution | Nonsynonymous coding | 30% |
| MM04T | SLC22A3  | solute carrier family 22 (extraneuronal monoamine transporter), member 3                      | CCDS5277.1      | chr6_160864676-160864676_C_T  | 471S>L | Substitution | Nonsynonymous coding | 26% |

|       |          |                                                                                              |                 |                              |        |              |                      |     |
|-------|----------|----------------------------------------------------------------------------------------------|-----------------|------------------------------|--------|--------------|----------------------|-----|
| MM04T | SLC24A2  | solute carrier family 24 (sodium/potassium/calcium exchanger),                               | CCDS6493.1      | chr9_19786675-19786675_T_C   | 64T>A  | Substitution | Nonsynonymous coding | 26% |
| MM04T | SLC24A2  | solute carrier family 24 (sodium/potassium/calcium exchanger),                               | CCDS6493.1      | chr9_19786147-19786147_G_A   | 240R>X | Substitution | Nonsense             | 33% |
| MM04T | SLC25A12 | solute carrier family 25 (aspartate/glutamate carrier), member 12                            | CCDS33327.1     | chr2_172641873-172641873_C_T | 650E>K | Substitution | Nonsynonymous coding | 34% |
| MM04T | SLC25A13 | solute carrier family 25 (aspartate/glutamate carrier), member 13                            | CCDS5645.1      | chr7_95864126-95864126_C_A   | 106E>X | Substitution | Nonsense             | 29% |
| MM04T | SLC25A21 | solute carrier family 25 (mitochondrial oxoaliphate carrier), member 21                      | CCDS9663.1      | chr14_37283181-37283181_C_T  | 49D>N  | Substitution | Nonsynonymous coding | 14% |
| MM04T | SLC25A23 | solute carrier family 25 (mitochondrial carrier; phosphate carrier), member 23               | CCDS32882.1     | chr19_6454349-6454349_G_T    | 260F>L | Substitution | Nonsynonymous coding | 27% |
| MM04T | SLC25A24 | solute carrier family 25 (mitochondrial carrier; phosphate carrier), member 24               | CCDS41361.1     | chr1_108724600-108724600_T_G | 121T>P | Substitution | Nonsynonymous coding | 27% |
| MM04T | SLC25A27 | solute carrier family 25, member 27                                                          | CCDS43470.1     | chr6_46644184-46644184_C_T   | 322P>L | Substitution | Nonsynonymous coding | 31% |
| MM04T | SLC25A3  | solute carrier family 25 (mitochondrial carrier; phosphate carrier), member 3                | CCDS9066.1      | chr12_98993807-98993807_G_T  | 240R>L | Substitution | Nonsynonymous coding | 27% |
| MM04T | SLC25A30 | solute carrier family 25, member 30                                                          | CCDS31967.1     | chr13_45983133-45983133_A_C  | 47I>M  | Substitution | Nonsynonymous coding | 35% |
| MM04T | SLC25A31 | solute carrier family 25 (mitochondrial carrier; adenine nucleotide translocator), member 31 | CCDS3733.1      | chr4_128694702-128694702_C_A | 307F>L | Substitution | Nonsynonymous coding | 32% |
| MM04T | SLC25A48 | solute carrier family 25, member 48                                                          | ENST00000420621 | chr5_135215704-135215704_G_T | 287M>I | Substitution | Nonsynonymous coding | 12% |
| MM04T | SLC26A10 | solute carrier family 26, member 10                                                          | CCDS8949.2      | chr12_58017819-58017819_C_T  | 389R>C | Substitution | Nonsynonymous coding | 30% |
| MM04T | SLC26A11 | solute carrier family 26, member 11                                                          | CCDS11771.2     | chr17_78215614-78215614_G_A  | 344A>T | Substitution | Nonsynonymous coding | 35% |
| MM04T | SLC26A3  | solute carrier family 26, member 3                                                           | CCDS5748.1      | chr7_107408083-107408083_C_T | 738D>N | Substitution | Nonsynonymous coding | 38% |
| MM04T | SLC26A3  | solute carrier family 26, member 3                                                           | CCDS5748.1      | chr7_107431609-107431609_G_A | 152R>C | Substitution | Nonsynonymous coding | 29% |
| MM04T | SLC26A4  | solute carrier family 26, member 4                                                           | CCDS5746.1      | chr7_107350568-107350568_T_G | 720L>W | Substitution | Nonsynonymous coding | 16% |
| MM04T | SLC26A7  | solute carrier family 26, member 7                                                           | CCDS6255.1      | chr8_92346655-92346655_C_A   | 259L>I | Substitution | Nonsynonymous coding | 39% |
| MM04T | SLC26A7  | solute carrier family 26, member 7                                                           | CCDS6255.1      | chr8_92350421-92350421_A_G   | 280N>S | Substitution | Nonsynonymous coding | 22% |
| MM04T | SLC26A7  | solute carrier family 26, member 7                                                           | CCDS6255.1      | chr8_92365219-92365219_G_A   | 437D>N | Substitution | Nonsynonymous coding | 24% |
| MM04T | SLC26A8  | solute carrier family 26, member 8                                                           | CCDS4813.1      | chr6_35980127-35980127_G_A   | 71R>X  | Substitution | Nonsense             | 45% |
| MM04T | SLC27A6  | solute carrier family 27 (fatty acid transporter), member 6                                  | CCDS4145.1      | chr5_128301957-128301957_C_T | 43R>W  | Substitution | Nonsynonymous coding | 26% |
| MM04T | SLC28A1  | solute carrier family 28 (sodium-coupled nucleoside transporter), member 1                   | CCDS10334.1     | chr15_85433676-85433676_G_T  | 63R>M  | Substitution | Nonsynonymous coding | 23% |
| MM04T | SLC28A2  | solute carrier family 28 (sodium-coupled nucleoside transporter), member 2                   | CCDS10121.1     | chr15_45559675-45559675_G_A  | 322R>H | Substitution | Nonsynonymous coding | 34% |
| MM04T | SLC29A3  | solute carrier family 29 (nucleoside transporters), member 3                                 | CCDS7310.1      | chr10_73121811-73121811_G_A  | 292D>N | Substitution | Nonsynonymous coding | 20% |
| MM04T | SLC2A2   | solute carrier family 2 (facilitated glucose transporter), member 2                          | CCDS3215.1      | chr3_170715887-170715887_G_T | 460F>L | Substitution | Nonsynonymous coding | 30% |
| MM04T | SLC2A2   | solute carrier family 2 (facilitated glucose transporter), member 2                          | CCDS3215.1      | chr3_170723124-170723124_G_T | 305L>I | Substitution | Nonsynonymous coding | 29% |
| MM04T | SLC34A3  | solute carrier family 34 (sodium phosphate), member 3                                        | CCDS7038.1      | chr9_140128130-140128130_A_C | 268N>H | Substitution | Nonsynonymous coding | 36% |
| MM04T | SLC35A2  | solute carrier family 35 (UDP-galactose transporter), member A2                              | CCDS14311.1     | chrX_48762108-48762108_C_T   | 360V>I | Substitution | Nonsynonymous coding | 38% |
| MM04T | SLC35D3  | solute carrier family 35, member D3                                                          | CCDS34544.1     | chr6_137245335-137245335_C_T | 251S>L | Substitution | Nonsynonymous coding | 31% |
| MM04T | SLC35E4  | solute carrier family 35, member E4                                                          | CCDS13882.1     | chr22_31032486-31032486_G_A  | 17E>K  | Substitution | Nonsynonymous coding | 31% |
| MM04T | SLC35F1  | solute carrier family 35, member F1                                                          | CCDS34524.1     | chr6_118556782-118556782_A_G | 154T>A | Substitution | Nonsynonymous coding | 29% |

|       |          |                                                                                             |             |                               |        |              |                      |     |
|-------|----------|---------------------------------------------------------------------------------------------|-------------|-------------------------------|--------|--------------|----------------------|-----|
| MM04T | SLC35F3  | solute carrier family 35, member F3                                                         | CCDS1600.1  | chr1_234040861-234040861_G_A  | 13G>D  | Substitution | Nonsynonymous coding | 38% |
| MM04T | SLC35F3  | solute carrier family 35, member F3                                                         | CCDS1600.1  | chr1_234454551-234454551_T_G  | 337L>V | Substitution | Nonsynonymous coding | 20% |
| MM04T | SLC36A2  | solute carrier family 36 (proton/amino acid symporter), member 2                            | CCDS4315.1  | chr5_150726859-150726859_T_C  | 55T>A  | Substitution | Nonsynonymous coding | 20% |
| MM04T | SLC36A4  | solute carrier family 36 (proton/amino acid symporter), member 4                            | CCDS8291.1  | chr11_92881996-92881996_G_T   | 408L>I | Substitution | Nonsynonymous coding | 34% |
| MM04T | SLC37A2  | solute carrier family 37 (glycerol-3-phosphate transporter), member 2                       | CCDS31714.1 | chr11_124952154-124952154_C_A | 300F>L | Substitution | Nonsynonymous coding | 30% |
| MM04T | SLC38A1  | solute carrier family 38, member 1                                                          | CCDS41774.1 | chr12_46623362-46623362_C_A   | 61K>N  | Substitution | Nonsynonymous coding | 29% |
| MM04T | SLC38A1  | solute carrier family 38, member 1                                                          | CCDS41774.1 | chr12_46633559-46633559_C_T   | 9E>K   | Substitution | Nonsynonymous coding | 20% |
| MM04T | SLC38A11 | solute carrier family 38, member 11                                                         | CCDS2224.1  | chr2_165771647-165771647_G_T  | 197Y>X | Substitution | Nonsense             | 24% |
| MM04T | SLC38A6  | solute carrier family 38, member 6                                                          | CCDS9751.1  | chr14_61449304-61449304_G_T   | 62G>C  | Substitution | Nonsynonymous coding | 19% |
| MM04T | SLC39A10 | solute carrier family 39 (zinc transporter), member 10                                      | CCDS33353.1 | chr2_196545017-196545017_A_C  | 84K>T  | Substitution | Nonsynonymous coding | 36% |
| MM04T | SLC39A12 | solute carrier family 39 (zinc transporter), member 12                                      | CCDS44362.1 | chr10_18242415-18242415_G_T   | 70E>D  | Substitution | Nonsynonymous coding | 28% |
| MM04T | SLC39A5  | solute carrier family 39 (metal ion transporter), member 5                                  | CCDS8912.2  | chr12_56630210-56630210_G_A   | 326E>K | Substitution | Nonsynonymous coding | 26% |
| MM04T | SLC39A5  | solute carrier family 39 (metal ion transporter), member 5                                  | CCDS8912.2  | chr12_56630789-56630789_G_A   | 428E>K | Substitution | Nonsynonymous coding | 28% |
| MM04T | SLC39A9  | solute carrier family 39 (zinc transporter), member 9                                       | CCDS9795.1  | chr14_69922500-69922500_C_T   | 204R>W | Substitution | Nonsynonymous coding | 24% |
| MM04T | SLC39A9  | solute carrier family 39 (zinc transporter), member 9                                       | CCDS9795.1  | chr14_69908806-69908806_G_T   | 76E>X  | Substitution | Nonsense             | 40% |
| MM04T | SLC3A1   | solute carrier family 3 (cystine, dibasic and neutral amino acid transporters, activator of | CCDS1819.1  | chr2_44502902-44502902_C_A    | 76F>L  | Substitution | Nonsynonymous coding | 34% |
| MM04T | SLC44A1  | solute carrier family 44, member 1                                                          | CCDS6763.1  | chr9_108125227-108125227_C_A  | 342F>L | Substitution | Nonsynonymous coding | 22% |
| MM04T | SLC44A5  | solute carrier family 44, member 5                                                          | CCDS667.1   | chr1_75681455-75681455_C_A    | 571R>I | Substitution | Nonsynonymous coding | 28% |
| MM04T | SLC44A5  | solute carrier family 44, member 5                                                          | CCDS667.1   | chr1_75704306-75704306_A_G    | 183F>S | Substitution | Nonsynonymous coding | 29% |
| MM04T | SLC44A5  | solute carrier family 44, member 5                                                          | CCDS667.1   | chr1_75683575-75683575_C_A    | 534E>X | Substitution | Nonsense             | 40% |
| MM04T | SLC45A3  | solute carrier family 45, member 3                                                          | CCDS1458.1  | chr1_205631156-205631156_C_T  | 353A>T | Substitution | Nonsynonymous coding | 33% |
| MM04T | SLC45A4  | solute carrier family 45, member 4                                                          | CCDS34948.1 | chr8_142221718-142221718_C_A  | 740M>I | Substitution | Nonsynonymous coding | 26% |
| MM04T | SLC46A3  | solute carrier family 46, member 3                                                          | CCDS45021.1 | chr13_29287127-29287127_C_A   | 250K>N | Substitution | Nonsynonymous coding | 34% |
| MM04T | SLC46A3  | solute carrier family 46, member 3                                                          | CCDS45021.1 | chr13_29287217-29287217_A_C   | 220D>E | Substitution | Nonsynonymous coding | 24% |
| MM04T | SLC48A1  | solute carrier family 48 (heme transporter), member 1                                       | CCDS8755.2  | chr12_48172961-48172961_C_A   | 96A>D  | Substitution | Nonsynonymous coding | 26% |
| MM04T | SLC4A2   | solute carrier family 4, anion exchanger, member 2 (erythrocyte membrane protein            | CCDS5917.1  | chr7_150765106-150765106_G_A  | 371R>H | Substitution | Nonsynonymous coding | 41% |
| MM04T | SLC4A4   | solute carrier family 4, sodium bicarbonate cotransporter, member 4                         | CCDS47071.1 | chr4_72121049-72121049_G_T    | 62E>D  | Substitution | Nonsynonymous coding | 30% |
| MM04T | SLC4A4   | solute carrier family 4, sodium bicarbonate cotransporter, member 4                         | CCDS47071.1 | chr4_72316110-72316110_T_C    | 353F>S | Substitution | Nonsynonymous coding | 41% |
| MM04T | SLC4A5   | solute carrier family 4, sodium bicarbonate cotransporter, member 5                         | CCDS1936.1  | chr2_74474397-74474397_T_C    | 609I>V | Substitution | Nonsynonymous coding | 37% |
| MM04T | SLC4A5   | solute carrier family 4, sodium bicarbonate cotransporter, member 5                         | CCDS1936.1  | chr2_74477476-74477476_A_C    | 549N>K | Substitution | Nonsynonymous coding | 40% |
| MM04T | SLC51B   | solute carrier family 51, beta subunit                                                      | CCDS10199.1 | chr15_65345313-65345313_G_T   | 66K>N  | Substitution | Nonsynonymous coding | 34% |
| MM04T | SLC5A1   | solute carrier family 5 (sodium/glucose cotransporter), member 1                            | CCDS13902.1 | chr22_32495249-32495249_G_A   | 454D>N | Substitution | Nonsynonymous coding | 16% |



|       |          |                                                                                        |             |                               |         |              |                      |     |
|-------|----------|----------------------------------------------------------------------------------------|-------------|-------------------------------|---------|--------------|----------------------|-----|
| MM04T | SLC5A10  | solute carrier family 5 (sodium/glucose cotransporter), member 10                      | CCDS11201.2 | chr17_18916717-18916717_G_A   | 342R>Q  | Substitution | Nonsynonymous coding | 19% |
| MM04T | SLC5A8   | solute carrier family 5 (iodide transporter), member 8                                 | CCDS9080.1  | chr12_101552060-101552060_C_A | 559E>D  | Substitution | Nonsynonymous coding | 25% |
| MM04T | SLC6A12  | solute carrier family 6 (neurotransmitter transporter, betaine/GABA), member 12        | CCDS8501.1  | chr12_319093-319093_C_A       | 20E>D   | Substitution | Nonsynonymous coding | 18% |
| MM04T | SLC6A18  | solute carrier family 6, member 18                                                     | CCDS3860.1  | chr5_1244860-1244860_A_G      | 545Y>C  | Substitution | Nonsynonymous coding | 21% |
| MM04T | SLC7A6OS | solute carrier family 7, member 6 opposite strand                                      | CCDS10865.1 | chr16_68335245-68335245_C_A   | 288S>I  | Substitution | Nonsynonymous coding | 29% |
| MM04T | SLC7A7   | solute carrier family 7 (amino acid transporter light chain, y+L system), member 7     | CCDS9574.1  | chr14_23282105-23282105_T_G   | NA      | Substitution | Splice site donor    | 25% |
| MM04T | SLC7A8   | solute carrier family 7 (amino acid transporter light chain, L system), member 8       | CCDS9590.1  | chr14_23652012-23652012_T_C   | 38K>E   | Substitution | Nonsynonymous coding | 33% |
| MM04T | SLC8A1   | solute carrier family 8 (sodium/calcium exchanger), member 1                           | CCDS1806.1  | chr2_40656657-40656657_C_A    | 255R>I  | Substitution | Nonsynonymous coding | 25% |
| MM04T | SLC8A3   | solute carrier family 8 (sodium/calcium exchanger), member 3                           | CCDS35498.1 | chr14_70512693-70512693_C_A   | 919E>X  | Substitution | Nonsense             | 16% |
| MM04T | SLC9A2   | solute carrier family 9, subfamily A (NHE2, cation proton antiporter 2), member 2      | CCDS2062.1  | chr2_103324731-103324731_G_A  | 741R>Q  | Substitution | Nonsynonymous coding | 33% |
| MM04T | SLC9A4   | solute carrier family 9, subfamily A (NHE4, cation proton antiporter 4), member 4      | CCDS33264.1 | chr2_103125355-103125355_A_C  | 484N>T  | Substitution | Nonsynonymous coding | 32% |
| MM04T | SLC9A6   | solute carrier family 9, subfamily A (NHE6, cation proton antiporter 6), member 6      | CCDS44003.1 | chrX_135084290-135084290_G_A  | 273E>K  | Substitution | Nonsynonymous coding | 20% |
| MM04T | SLC9A6   | solute carrier family 9, subfamily A (NHE6, cation proton antiporter 6), member 6      | CCDS44003.1 | chrX_135092669-135092669_C_A  | 323S>Y  | Substitution | Nonsynonymous coding | 18% |
| MM04T | SLC9A7   | solute carrier family 9, subfamily A (NHE7, cation proton antiporter 7), member 7      | CCDS14269.1 | chrX_46466477-46466477_C_A    | 696E>D  | Substitution | Nonsynonymous coding | 32% |
| MM04T | SLC9A7   | solute carrier family 9, subfamily A (NHE7, cation proton antiporter 7), member 7      | CCDS14269.1 | chrX_46495061-46495061_C_T    | 546E>K  | Substitution | Nonsynonymous coding | 38% |
| MM04T | SLC9B2   | solute carrier family 9, subfamily B (NHA2, cation proton antiporter 2), member 2      | CCDS3662.1  | chr4_103968330-103968330_A    | NA      | Insertion    | Frameshift           | 31% |
| MM04T | SLC9B2   | solute carrier family 9, subfamily B (NHA2, cation proton antiporter 2), member 2      | CCDS3662.1  | chr4_103968343-103968343_A_G  | 252S>P  | Substitution | Nonsynonymous coding | 28% |
| MM04T | SLC9C1   | solute carrier family 9, subfamily C (Na+-transporting carboxylic acid decarboxylase), | CCDS33817.1 | chr3_111958848-111958848_G_A  | 429R>C  | Substitution | Nonsynonymous coding | 33% |
| MM04T | SLC9C2   | solute carrier family 9, member C2 (putative)                                          | CCDS1308.1  | chr1_173472431-173472431_C_A  | 1115K>N | Substitution | Nonsynonymous coding | 36% |
| MM04T | SLC9C2   | solute carrier family 9, member C2 (putative)                                          | CCDS1308.1  | chr1_173569302-173569302_G_A  | 61S>F   | Substitution | Nonsynonymous coding | 28% |
| MM04T | SLCO1A2  | solute carrier organic anion transporter family, member 1A2                            | CCDS8686.1  | chr12_21467610-21467610_G_T   | 70L>I   | Substitution | Nonsynonymous coding | 40% |
| MM04T | SLCO1A2  | solute carrier organic anion transporter family, member 1A2                            | CCDS8686.1  | chr12_21487575-21487575_C_A   | 3E>X    | Substitution | Nonsense             | 19% |
| MM04T | SLCO1B1  | solute carrier organic anion transporter family, member 1B1                            | CCDS8685.1  | chr12_21370153-21370153_A_C   | 533K>T  | Substitution | Nonsynonymous coding | 43% |
| MM04T | SLCO1B3  | solute carrier organic anion transporter family, member 1B3                            | CCDS8684.1  | chr12_21033796-21033796_T_G   | 447S>A  | Substitution | Nonsynonymous coding | 40% |
| MM04T | SLCO2A1  | solute carrier organic anion transporter family, member 2A1                            | CCDS3084.1  | chr3_133673955-133673955_C_A  | 160Q>H  | Substitution | Nonsynonymous coding | 23% |
| MM04T | SLFN5    | schlafen family member 5                                                               | CCDS32619.1 | chr17_33592836-33592836_G_C   | 869A>P  | Substitution | Nonsynonymous coding | 30% |
| MM04T | SLIT2    | slit homolog 2 (Drosophila)                                                            | CCDS3426.1  | chr4_20620402-20620402_C_T    | 1454R>X | Substitution | Nonsense             | 32% |
| MM04T | SLITRK1  | SLIT and NTRK-like family, member 1                                                    | CCDS9464.1  | chr13_84453961-84453961_G_A   | 561P>L  | Substitution | Nonsynonymous coding | 28% |
| MM04T | SLITRK1  | SLIT and NTRK-like family, member 1                                                    | CCDS9464.1  | chr13_84454735-84454735_G_T   | 303S>Y  | Substitution | Nonsynonymous coding | 34% |
| MM04T | SLITRK1  | SLIT and NTRK-like family, member 1                                                    | CCDS9464.1  | chr13_84455278-84455278_C_T   | 122R>Q  | Substitution | Nonsynonymous coding | 40% |
| MM04T | SLITRK2  | SLIT and NTRK-like family, member 2                                                    | CCDS14680.1 | chrX_144904986-144904986_C_T  | 348S>F  | Substitution | Nonsynonymous coding | 19% |
| MM04T | SLITRK3  | SLIT and NTRK-like family, member 3                                                    | CCDS3197.1  | chr3_164907463-164907463_G_T  | 386L>I  | Substitution | Nonsynonymous coding | 32% |

|       |         |                                                                                          |              |                               |         |              |                      |     |
|-------|---------|------------------------------------------------------------------------------------------|--------------|-------------------------------|---------|--------------|----------------------|-----|
| MM04T | SLITRK4 | SLIT and NTRK-like family, member 4                                                      | CCDS14679.1  | chrX_142717102-142717102_C_T  | 608R>Q  | Substitution | Nonsynonymous coding | 31% |
| MM04T | SLITRK5 | SLIT and NTRK-like family, member 5                                                      | CCDS9465.1   | chr13_88328511-88328511_T_C   | 290S>P  | Substitution | Nonsynonymous coding | 40% |
| MM04T | SLITRK5 | SLIT and NTRK-like family, member 5                                                      | CCDS9465.1   | chr13_88329213-88329213_G_A   | 524V>I  | Substitution | Nonsynonymous coding | 28% |
| MM04T | SLITRK6 | SLIT and NTRK-like family, member 6                                                      | CCDS41903.1  | chr13_86368645-86368645_G_T   | 667H>N  | Substitution | Nonsynonymous coding | 36% |
| MM04T | SLK     | STE20-like kinase                                                                        | CCDS7553.1   | chr10_105762811-105762811_G_T | 625E>D  | Substitution | Nonsynonymous coding | 41% |
| MM04T | SLK     | STE20-like kinase                                                                        | CCDS7553.1   | chr10_105768032-105768032_G_A | 901R>Q  | Substitution | Nonsynonymous coding | 28% |
| MM04T | SLMAP   | sarcolemma associated protein                                                            | CCDS33774.1  | chr3_57846448-57846448_G_A    | 237R>Q  | Substitution | Nonsynonymous coding | 72% |
| MM04T | SLTM    | SAFB-like, transcription modulator                                                       | CCDS10168.2  | chr15_59185133-59185133_G_A   | 621R>C  | Substitution | Nonsynonymous coding | 21% |
| MM04T | SMAP2   | small ArfGAP2                                                                            | CCDS451.1    | chr1_40872452-40872452_C_T    | 50R>X   | Substitution | Nonsense             | 33% |
| MM04T | SMARCA1 | SWI/SNF related, matrix associated, actin dependent regulator of chromatin, subfamily    | CCDS14612.1  | chrX_128626006-128626006_G_A  | 576A>V  | Substitution | Nonsynonymous coding | 21% |
| MM04T | SMARCA2 | SWI/SNF related, matrix associated, actin dependent regulator of chromatin, subfamily    | CCDS34977.1  | chr9_2029101-2029101_C_A      | 27L>I   | Substitution | Nonsynonymous coding | 33% |
| MM04T | SMARCA5 | SWI/SNF related, matrix associated, actin dependent regulator of chromatin, subfamily    | CCDS3761.1   | chr4_144442700-144442700_G_A  | 124R>H  | Substitution | Nonsynonymous coding | 22% |
| MM04T | SMARCA5 | SWI/SNF related, matrix associated, actin dependent regulator of chromatin, subfamily    | CCDS3761.1   | chr4_144466678-144466678_G_A  | 780R>H  | Substitution | Nonsynonymous coding | 23% |
| MM04T | SMARCB1 | SWI/SNF related, matrix associated, actin dependent regulator of chromatin, subfamily    | CCDS13817.1  | chr22_24129381-24129381_A_G   | 9T>A    | Substitution | Nonsynonymous coding | 31% |
| MM04T | SMARCC2 | SWI/SNF related, matrix associated, actin dependent regulator of chromatin, subfamily c, | CCDS8907.1   | chr12_56574823-56574823_G_C   | 340T>R  | Substitution | Nonsynonymous coding | 23% |
| MM04T | SMARCD1 | SWI/SNF related, matrix associated, actin dependent regulator of chromatin, subfamily    | CCDS8797.2   | chr12_50482348-50482348_C_A   | 233F>L  | Substitution | Nonsynonymous coding | 22% |
| MM04T | SMC1A   | structural maintenance of chromosomes 1A                                                 | CCDS14352.1  | chrX_53409534-53409534_C_T    | 1060E>K | Substitution | Nonsynonymous coding | 34% |
| MM04T | SMC1A   | structural maintenance of chromosomes 1A                                                 | CCDS14352.1  | chrX_53436051-53436051_C_T    | 496R>H  | Substitution | Nonsynonymous coding | 29% |
| MM04T | SMC1B   | structural maintenance of chromosomes 1B                                                 | CCDS43027.1  | chr22_45758768-45758768_C_A   | 853K>N  | Substitution | Nonsynonymous coding | 31% |
| MM04T | SMC1B   | structural maintenance of chromosomes 1B                                                 | CCDS43027.1  | chr22_45758812-45758812_T_G   | 839K>Q  | Substitution | Nonsynonymous coding | 45% |
| MM04T | SMC3    | structural maintenance of chromosomes 3                                                  | CCDS31285.1  | chr10_112349729-112349729_C_A | 497L>I  | Substitution | Nonsynonymous coding | 21% |
| MM04T | SMC5    | structural maintenance of chromosomes 5                                                  | CCDS6632.1   | chr9_72892229-72892229_C_A    | 128F>L  | Substitution | Nonsynonymous coding | 28% |
| MM04T | SMC6    | structural maintenance of chromosomes 6                                                  | CCDS1690.1   | chr2_17888487-17888487_T_G    | 669S>R  | Substitution | Nonsynonymous coding | 35% |
| MM04T | SMC6    | structural maintenance of chromosomes 6                                                  | CCDS1690.1   | chr2_17876489-17876489_C_A    | 870E>X  | Substitution | Nonsense             | 21% |
| MM04T | SMCHD1  | structural maintenance of chromosomes flexible hinge domain containing 1                 | CCDS45822.1  | chr18_2763774-2763774_C_T     | 1569S>L | Substitution | Nonsynonymous coding | 31% |
| MM04T | SMCHD1  | structural maintenance of chromosomes flexible hinge domain containing 1                 | CCDS45822.1  | chr18_2784503-2784503_G_A     | 1868R>Q | Substitution | Nonsynonymous coding | 29% |
| MM04T | SMCR7   | Smith-Magenis syndrome chromosome region, candidate 7                                    | CCDS45624.1  | chr17_18168025-18168025_G_A   | 449D>N  | Substitution | Nonsynonymous coding | 28% |
| MM04T | SMG1    | smg-1 homolog, phosphatidylinositol 3-kinase-related kinase (C. elegans)                 | CCDS45430.1  | chr16_18849370-18849370_C_T   | 2460R>H | Substitution | Nonsynonymous coding | 24% |
| MM04T | SMG1    | smg-1 homolog, phosphatidylinositol 3-kinase-related kinase (C. elegans)                 | CCDS45430.1  | chr16_18849969-18849969_T_C   | 2330I>V | Substitution | Nonsynonymous coding | 24% |
| MM04T | SMG8    | smg-8 homolog, nonsense mediated mRNA decay factor (C. elegans)                          | CCDS11615.1  | chr17_57288085-57288085_C_T   | 225R>X  | Substitution | Nonsense             | 39% |
| MM04T | SMIM10  | small integral membrane protein 10                                                       | NM_001163438 | chrX_134125354-134125354_G_A  | 77V>I   | Substitution | Nonsynonymous coding | 33% |
| MM04T | SMO     | smoothed, frizzled family receptor                                                       | CCDS5811.1   | chr7_128850335-128850335_G_A  | 533S>N  | Substitution | Nonsynonymous coding | 36% |

|       |          |                                                              |             |                               |         |              |                      |     |
|-------|----------|--------------------------------------------------------------|-------------|-------------------------------|---------|--------------|----------------------|-----|
| MM04T | SMPX     | small muscle protein, X-linked                               | CCDS14200.1 | chrX_21772372-21772372_C_T    | 13A>T   | Substitution | Nonsynonymous coding | 31% |
| MM04T | SNAP91   | synaptosomal-associated protein, 91kDa                       | CCDS47455.1 | chr6_84417533-84417533_C_A    | 38K>N   | Substitution | Nonsynonymous coding | 19% |
| MM04T | SNAPC4   | small nuclear RNA activating complex, polypeptide 4, 190kDa  | CCDS6998.1  | chr9_139275241-139275241_G_A  | 817P>L  | Substitution | Nonsynonymous coding | 25% |
| MM04T | SNCA     | synuclein, alpha (non A4 component of amyloid precursor)     | CCDS3634.1  | chr4_90743425-90743425_C_T    | 93G>D   | Substitution | Nonsynonymous coding | 24% |
| MM04T | SNCAIP   | synuclein, alpha interacting protein                         | CCDS4131.1  | chr5_121786396-121786396_A_C  | 618K>N  | Substitution | Nonsynonymous coding | 33% |
| MM04T | SND1     | staphylococcal nuclease and tudor domain containing 1        | CCDS34747.1 | chr7_127729577-127729577_C_T  | 819R>W  | Substitution | Nonsynonymous coding | 27% |
| MM04T | SNRK     | SNF related kinase                                           | CCDS43075.1 | chr3_43345245-43345245_G_T    | 184E>X  | Substitution | Nonsense             | 33% |
| MM04T | SNRNP200 | small nuclear ribonucleoprotein 200kDa (U5)                  | CCDS2020.1  | chr2_96944592-96944592_G_T    | 1760L>M | Substitution | Nonsynonymous coding | 22% |
| MM04T | SNRNP40  | small nuclear ribonucleoprotein 40kDa (U5)                   | CCDS340.1   | chr1_31754229-31754229_C_A    | 216D>Y  | Substitution | Nonsynonymous coding | 31% |
| MM04T | SNRPB    | small nuclear ribonucleoprotein polypeptides B and B1        | CCDS13026.1 | chr20_2444500-2444500_C_G     | 105G>R  | Substitution | Nonsynonymous coding | 25% |
| MM04T | SNRPC    | small nuclear ribonucleoprotein polypeptide C                | CCDS34436.1 | chr6_34730416-34730416_G_T    | 32E>D   | Substitution | Nonsynonymous coding | 30% |
| MM04T | SNRPN    | small nuclear ribonucleoprotein polypeptide N                | CCDS10017.1 | chr15_25221458-25221458_G_T   | 54K>N   | Substitution | Nonsynonymous coding | 18% |
| MM04T | SNTG1    | syntrophin, gamma 1                                          | CCDS6147.1  | chr8_51705372-51705372_G_T    | 513A>S  | Substitution | Nonsynonymous coding | 20% |
| MM04T | SNX11    | sorting nexin 11                                             | CCDS11526.1 | chr17_46196467-46196467_G_A   | 153R>Q  | Substitution | Nonsynonymous coding | 19% |
| MM04T | SNX19    | sorting nexin 19                                             | CCDS31721.1 | chr11_130784870-130784870_G_T | 322S>Y  | Substitution | Nonsynonymous coding | 17% |
| MM04T | SNX20    | sorting nexin 20                                             | CCDS10745.1 | chr16_50707913-50707913_C_T   | 119D>N  | Substitution | Nonsynonymous coding | 19% |
| MM04T | SNX25    | sorting nexin 25                                             | CCDS34116.1 | chr4_186244723-186244723_C_A  | 342F>L  | Substitution | Nonsynonymous coding | 50% |
| MM04T | SNX7     | sorting nexin 7                                              | CCDS755.2   | chr1_99203886-99203886_A_C    | 407N>H  | Substitution | Nonsynonymous coding | 14% |
| MM04T | SOAT2    | sterol O-acyltransferase 2                                   | CCDS8847.1  | chr12_53517635-53517635_G_A   | 499R>Q  | Substitution | Nonsynonymous coding | 40% |
| MM04T | SOGA2    | SOGA family member 2                                         | CCDS11841.1 | chr18_8720483-8720483_A_G     | 116R>G  | Substitution | Nonsynonymous coding | 22% |
| MM04T | SOGA3    | SOGA family member 3                                         | CCDS43505.1 | chr6_127794511-127794511_A_C  | 920I>S  | Substitution | Nonsynonymous coding | 27% |
| MM04T | SOGA3    | SOGA family member 3                                         | CCDS43505.1 | chr6_127797352-127797352_C_T  | 607E>K  | Substitution | Nonsynonymous coding | 23% |
| MM04T | SON      | SON DNA binding protein                                      | CCDS13629.1 | chr21_34924937-34924937_G_A   | 1134D>N | Substitution | Nonsynonymous coding | 33% |
| MM04T | SORCS1   | sortilin-related VPS10 domain containing receptor 1          | CCDS31283.1 | chr10_108371764-108371764_G_A | 980R>C  | Substitution | Nonsynonymous coding | 32% |
| MM04T | SORCS1   | sortilin-related VPS10 domain containing receptor 1          | CCDS31283.1 | chr10_108521351-108521351_G_T | 318F>L  | Substitution | Nonsynonymous coding | 33% |
| MM04T | SORCS2   | sortilin-related VPS10 domain containing receptor 2          | CCDS47008.1 | chr4_7668894-7668894_G_A      | 372R>Q  | Substitution | Nonsynonymous coding | 20% |
| MM04T | SORCS3   | sortilin-related VPS10 domain containing receptor 3          | CCDS7558.1  | chr10_106937871-106937871_C_T | 650S>L  | Substitution | Nonsynonymous coding | 25% |
| MM04T | SORCS3   | sortilin-related VPS10 domain containing receptor 3          | CCDS7558.1  | chr10_107005354-107005354_G_A | 975D>N  | Substitution | Nonsynonymous coding | 22% |
| MM04T | SORCS3   | sortilin-related VPS10 domain containing receptor 3          | CCDS7558.1  | chr10_107012619-107012619_G_T | 1064K>N | Substitution | Nonsynonymous coding | 26% |
| MM04T | SORL1    | sortilin-related receptor, L(DLR class) A repeats containing | CCDS8436.1  | chr11_121495874-121495874_T_G | 2084I>M | Substitution | Nonsynonymous coding | 20% |
| MM04T | SOS2     | son of sevenless homolog 2 (Drosophila)                      | CCDS9697.1  | chr14_50611968-50611968_A_C   | 863L>V  | Substitution | Nonsynonymous coding | 25% |
| MM04T | SOS2     | son of sevenless homolog 2 (Drosophila)                      | CCDS9697.1  | chr14_50612269-50612269_T_G   | 810E>D  | Substitution | Nonsynonymous coding | 28% |

|       |          |                                                                |                 |                              |         |              |                      |     |
|-------|----------|----------------------------------------------------------------|-----------------|------------------------------|---------|--------------|----------------------|-----|
| MM04T | SOWAHA   | sosondowah ankyrin repeat domain family member A               | CCDS43361.1     | chr5_132150335-132150335_G_A | 341R>H  | Substitution | Nonsynonymous coding | 25% |
| MM04T | SOWAHB   | sosondowah ankyrin repeat domain family member B               | CCDS34017.1     | chr4_77816759-77816759_C_A   | 748K>N  | Substitution | Nonsynonymous coding | 23% |
| MM04T | SOX6     | SRY (sex determining region Y)-box 6                           | CCDS7821.1      | chr11_16340191-16340191_C_A  | 82E>D   | Substitution | Nonsynonymous coding | 30% |
| MM04T | SP1      | Sp1 transcription factor                                       | CCDS8857.1      | chr12_53804718-53804718_G_T  | 684K>N  | Substitution | Nonsynonymous coding | 24% |
| MM04T | SPAG17   | sperm associated antigen 17                                    | CCDS899.1       | chr1_118693253-118693253_C_A | NA      | Substitution | Splice site acceptor | 60% |
| MM04T | SPAG9    | sperm associated antigen 9                                     | CCDS45740.1     | chr17_49057274-49057274_G_T  | 1081S>Y | Substitution | Nonsynonymous coding | 31% |
| MM04T | SPAG9    | sperm associated antigen 9                                     | CCDS45740.1     | chr17_49197752-49197752_T_C  | 89Y>C   | Substitution | Nonsynonymous coding | 31% |
| MM04T | SPAG9    | sperm associated antigen 9                                     | CCDS45740.1     | chr17_49119008-49119008_C_A  | 199E>X  | Substitution | Nonsense             | 38% |
| MM04T | SPAST    | spastin                                                        | CCDS1778.1      | chr2_32379535-32379535_G_A   | 607W>X  | Substitution | Nonsense             | 21% |
| MM04T | SPATA16  | spermatogenesis associated 16                                  | CCDS3221.1      | chr3_172766761-172766761_G_T | 246L>I  | Substitution | Nonsynonymous coding | 40% |
| MM04T | SPATA17  | spermatogenesis associated 17                                  | CCDS1519.1      | chr1_217915399-217915399_T_G | 160Y>D  | Substitution | Nonsynonymous coding | 32% |
| MM04T | SPATA18  | spermatogenesis associated 18                                  | CCDS3489.1      | chr4_52917949-52917949_G_T   | 27E>X   | Substitution | Nonsense             | 22% |
| MM04T | SPATA20  | spermatogenesis associated 20                                  | CCDS11571.1     | chr17_48625670-48625670_G_A  | 51R>Q   | Substitution | Nonsynonymous coding | 33% |
| MM04T | SPATA21  | spermatogenesis associated 21                                  | CCDS172.1       | chr1_16730506-16730506_G_T   | 280F>L  | Substitution | Nonsynonymous coding | 24% |
| MM04T | SPATA24  | spermatogenesis associated 24                                  | ENST00000302091 | chr5_138732481-138732481_C_T | 218A>T  | Substitution | Nonsynonymous coding | 15% |
| MM04T | SPATA32  | spermatogenesis associated 32                                  | CCDS32669.1     | chr17_43332623-43332623_G_A  | 309S>F  | Substitution | Nonsynonymous coding | 20% |
| MM04T | SPATA4   | spermatogenesis associated 4                                   | CCDS3826.1      | chr4_177113804-177113804_C_A | 221R>I  | Substitution | Nonsynonymous coding | 30% |
| MM04T | SPATA5L1 | spermatogenesis associated 5-like 1                            | CCDS10123.1     | chr15_45695046-45695046_G_T  | 140R>I  | Substitution | Nonsynonymous coding | 22% |
| MM04T | SPATA9   | spermatogenesis associated 9                                   | CCDS4076.1      | chr5_95011330-95011330_G_A   | 55A>V   | Substitution | Nonsynonymous coding | 33% |
| MM04T | SPDYA    | speedy homolog A (Xenopus laevis)                              | CCDS1767.2      | chr2_29038938-29038938_T_C   | 20S>P   | Substitution | Nonsynonymous coding | 23% |
| MM04T | SPDYC    | speedy homolog C (Xenopus laevis)                              | CCDS31606.1     | chr11_64939990-64939990_C_T  | 144R>X  | Substitution | Nonsense             | 32% |
| MM04T | SPECC1   | sperm antigen with calponin homology and coiled-coil domains 1 | CCDS32590.1     | chr17_20108118-20108118_G_T  | 252E>D  | Substitution | Nonsynonymous coding | 31% |
| MM04T | SPECC1   | sperm antigen with calponin homology and coiled-coil domains 1 | CCDS32590.1     | chr17_20108619-20108619_G_T  | 419K>N  | Substitution | Nonsynonymous coding | 21% |
| MM04T | SPECC1   | sperm antigen with calponin homology and coiled-coil domains 1 | CCDS32590.1     | chr17_20108551-20108551_G_T  | 397E>X  | Substitution | Nonsense             | 31% |
| MM04T | SPEF2    | sperm flagellar 2                                              | CCDS43309.1     | chr5_35700675-35700675_C_T   | 740A>V  | Substitution | Nonsynonymous coding | 28% |
| MM04T | SPEF2    | sperm flagellar 2                                              | CCDS43309.1     | chr5_35753775-35753775_C_T   | 1127A>V | Substitution | Nonsynonymous coding | 25% |
| MM04T | SPEG     | SPEG complex locus                                             | ENST00000452101 | chr2_220308758-220308758_G_A | 30A>T   | Substitution | Nonsynonymous coding | 32% |
| MM04T | SPEG     | SPEG complex locus                                             | CCDS42824.1     | chr2_220344574-220344574_G_A | 1719D>N | Substitution | Nonsynonymous coding | 31% |
| MM04T | SPERT    | spermatid associated                                           | CCDS9399.1      | chr13_46287329-46287329_G_A  | 57E>K   | Substitution | Nonsynonymous coding | 35% |
| MM04T | SPG11    | spastic paraplegia 11 (autosomal recessive)                    | CCDS10112.1     | chr15_44856800-44856800_C_T  | 2366E>K | Substitution | Nonsynonymous coding | 40% |
| MM04T | SPG11    | spastic paraplegia 11 (autosomal recessive)                    | CCDS10112.1     | chr15_44914034-44914034_C_A  | 848R>I  | Substitution | Nonsynonymous coding | 39% |
| MM04T | SPG11    | spastic paraplegia 11 (autosomal recessive)                    | CCDS10112.1     | chr15_44925802-44925802_T_G  | 546N>H  | Substitution | Nonsynonymous coding | 27% |

|       |        |                                                                          |                 |                               |         |              |                      |     |
|-------|--------|--------------------------------------------------------------------------|-----------------|-------------------------------|---------|--------------|----------------------|-----|
| MM04T | SPG11  | spastic paraplegia 11 (autosomal recessive)                              | CCDS10112.1     | chr15_44890524-44890524_C_A   | 1314E>X | Substitution | Nonsense             | 28% |
| MM04T | SPG20  | spastic paraplegia 20 (Troyer syndrome)                                  | CCDS9356.1      | chr13_36888421-36888421_C_T   | 476G>R  | Substitution | Nonsynonymous coding | 21% |
| MM04T | SPINK5 | serine peptidase inhibitor, Kazal type 5                                 | CCDS47300.1     | chr5_147481366-147481366_A_C  | 442K>T  | Substitution | Nonsynonymous coding | 19% |
| MM04T | SPINT1 | serine peptidase inhibitor, Kunitz type 1                                | CCDS10067.1     | chr15_41145694-41145694_A_C   | 204D>A  | Substitution | Nonsynonymous coding | 19% |
| MM04T | SPO11  | SPO11 meiotic protein covalently bound to DSB homolog (S. cerevisiae)    | CCDS13456.1     | chr20_55909114-55909114_C_A   | 158S>Y  | Substitution | Nonsynonymous coding | 38% |
| MM04T | SPO11  | SPO11 meiotic protein covalently bound to DSB homolog (S. cerevisiae)    | CCDS13456.1     | chr20_55915179-55915179_C_A   | 302H>N  | Substitution | Nonsynonymous coding | 31% |
| MM04T | SPOCD1 | SPOC domain containing 1                                                 | CCDS347.1       | chr1_32258314-32258314_C_T    | 914D>N  | Substitution | Nonsynonymous coding | 11% |
| MM04T | SPOCK3 | sparc/osteonectin, cwcv and kazal-like domains proteoglycan (testican) 3 | CCDS34095.1     | chr4_167675776-167675776_T_C  | 272S>G  | Substitution | Nonsynonymous coding | 32% |
| MM04T | SPON1  | spondin 1, extracellular matrix protein                                  | ENST00000310358 | chr11_14281225-14281225_G_T   | 602E>D  | Substitution | Nonsynonymous coding | 15% |
| MM04T | SPON1  | spondin 1, extracellular matrix protein                                  | ENST00000310358 | chr11_14284396-14284396_G_A   | 711R>Q  | Substitution | Nonsynonymous coding | 19% |
| MM04T | SPON1  | spondin 1, extracellular matrix protein                                  | ENST00000310358 | chr11_14157106-14157106_C_T   | 272R>X  | Substitution | Nonsense             | 33% |
| MM04T | SPON1  | spondin 1, extracellular matrix protein                                  | ENST00000310358 | chr11_14284425-14284425_C_T   | 721R>X  | Substitution | Nonsense             | 22% |
| MM04T | SPOPL  | speckle-type POZ protein-like                                            | CCDS33298.1     | chr2_139310141-139310141_C_T  | 124R>X  | Substitution | Nonsense             | 30% |
| MM04T | SPPL2A | signal peptide peptidase like 2A                                         | CCDS10138.1     | chr15_51000038-51000038_C_A   | 508E>X  | Substitution | Nonsense             | 21% |
| MM04T | SPR    | sepiapterin reductase (7,8-dihydrobiopterin:NADP+ oxidoreductase)        | CCDS1920.1      | chr2_73118536-73118536_G_A    | 219R>Q  | Substitution | Nonsynonymous coding | 21% |
| MM04T | SPTA1  | spectrin, alpha, erythrocytic 1 (elliptocytosis 2)                       | CCDS41423.1     | chr1_158617358-158617358_C_A  | 1289Q>H | Substitution | Nonsynonymous coding | 15% |
| MM04T | SPTA1  | spectrin, alpha, erythrocytic 1 (elliptocytosis 2)                       | CCDS41423.1     | chr1_158622400-158622400_G_T  | 1078L>I | Substitution | Nonsynonymous coding | 18% |
| MM04T | SPTA1  | spectrin, alpha, erythrocytic 1 (elliptocytosis 2)                       | CCDS41423.1     | chr1_158647588-158647588_C_A  | 283K>N  | Substitution | Nonsynonymous coding | 25% |
| MM04T | SPTBN2 | spectrin, beta, non-erythrocytic 2                                       | CCDS8150.1      | chr11_66453351-66453351_C_A   | 2388K>N | Substitution | Nonsynonymous coding | 32% |
| MM04T | SPTBN2 | spectrin, beta, non-erythrocytic 2                                       | CCDS8150.1      | chr11_66472475-66472475_C_T   | 758D>N  | Substitution | Nonsynonymous coding | 31% |
| MM04T | SPTBN5 | spectrin, beta, non-erythrocytic 5                                       | NM_016642       | chr15_42167712-42167712_G_A   | 1376R>C | Substitution | Nonsynonymous coding | 19% |
| MM04T | SPTBN5 | spectrin, beta, non-erythrocytic 5                                       | NM_016642       | chr15_42170740-42170740_T_G   | 1055Q>H | Substitution | Nonsynonymous coding | 32% |
| MM04T | SPZ1   | spermatogenic leucine zipper 1                                           | CCDS43336.1     | chr5_79616598-79616598_G_T    | 188K>N  | Substitution | Nonsynonymous coding | 18% |
| MM04T | SQLE   | squalene epoxidase                                                       | CCDS47918.1     | chr8_126015427-126015427_G_T  | 101G>X  | Substitution | Nonsense             | 23% |
| MM04T | SREK1  | splicing regulatory glutamine/lysine-rich protein 1                      | CCDS43323.1     | chr5_65458364-65458364_T_G    | 233N>K  | Substitution | Nonsynonymous coding | 33% |
| MM04T | SRFBP1 | serum response factor binding protein 1                                  | CCDS43354.1     | chr5_121309905-121309905_A_C  | 17R>S   | Substitution | Nonsynonymous coding | 31% |
| MM04T | SRGAP1 | SLIT-ROBO Rho GTPase activating protein 1                                | CCDS8967.1      | chr12_64536208-64536208_C_T   | 1005S>F | Substitution | Nonsynonymous coding | 33% |
| MM04T | SRGAP3 | SLIT-ROBO Rho GTPase activating protein 3                                | CCDS2572.1      | chr3_9166406-9166406_T_C      | NA      | Substitution | Splice site donor    | 24% |
| MM04T | SRL    | sarcalumenin                                                             | CCDS42113.1     | chr16_4242450-4242450_C_T     | 376D>N  | Substitution | Nonsynonymous coding | 33% |
| MM04T | SRPK1  | SRSF protein kinase 1                                                    | CCDS47415.1     | chr6_35806186-35806186_C_A    | 571E>X  | Substitution | Nonsense             | 34% |
| MM04T | SRPK3  | SRSF protein kinase 3                                                    | CCDS35441.1     | chrX_153050847-153050847_G_A  | 526E>K  | Substitution | Nonsynonymous coding | 25% |
| MM04T | SRPR   | signal recognition particle receptor (docking protein)                   | CCDS31717.1     | chr11_126134389-126134389_C_T | 524R>H  | Substitution | Nonsynonymous coding | 28% |

|       |            |                                                                                        |                 |                               |         |              |                      |     |
|-------|------------|----------------------------------------------------------------------------------------|-----------------|-------------------------------|---------|--------------|----------------------|-----|
| MM04T | SRRM2      | serine/arginine repetitive matrix 2                                                    | ENST00000382300 | chr16_2818898-2818898_C_A     | 139F>L  | Substitution | Nonsynonymous coding | 22% |
| MM04T | SRRM3      | serine/arginine repetitive matrix 3                                                    | ENST00000388802 | chr7_75914933-75914933_C_T    | 579R>C  | Substitution | Nonsynonymous coding | 24% |
| MM04T | SRRT       | serrate RNA effector molecule homolog (Arabidopsis)                                    | CCDS34709.1     | chr7_100482545-100482545_G_T  | 348S>I  | Substitution | Nonsynonymous coding | 34% |
| MM04T | SSPO       | SCO-spondin homolog (Bos taurus)                                                       | ENST00000378016 | chr7_149482693-149482693_G_A  | 1037E>K | Substitution | Nonsynonymous coding | 33% |
| MM04T | SSX2IP     | synovial sarcoma, X breakpoint 2 interacting protein                                   | CCDS699.1       | chr1_85128033-85128033_G_T    | 259L>I  | Substitution | Nonsynonymous coding | 34% |
| MM04T | ST14       | suppression of tumorigenicity 14 (colon carcinoma)                                     | CCDS8487.1      | chr11_130029916-130029916_G_T | 14K>N   | Substitution | Nonsynonymous coding | 20% |
| MM04T | ST18       | suppression of tumorigenicity 18 (breast carcinoma) (zinc finger protein)              | CCDS6149.1      | chr8_53045680-53045680_C_T    | 794R>H  | Substitution | Nonsynonymous coding | 23% |
| MM04T | ST3GAL4    | ST3 beta-galactoside alpha-2,3-sialyltransferase 4                                     | ENST00000239597 | chr11_126310163-126310163_G_A | 234R>K  | Substitution | Nonsynonymous coding | 30% |
| MM04T | ST3GAL4    | ST3 beta-galactoside alpha-2,3-sialyltransferase 4                                     | ENST00000239597 | chr11_126310230-126310230_G_T | 256Q>H  | Substitution | Nonsynonymous coding | 20% |
| MM04T | ST3GAL6    | ST3 beta-galactoside alpha-2,3-sialyltransferase 6                                     | CCDS2933.1      | chr3_98491728-98491728_A_C    | 80K>T   | Substitution | Nonsynonymous coding | 27% |
| MM04T | ST6GAL2    | ST6 beta-galactosamide alpha-2,6-sialyltransferase 2                                   | CCDS2073.1      | chr2_107423304-107423304_C_T  | 474D>N  | Substitution | Nonsynonymous coding | 17% |
| MM04T | ST6GALNAC2 | ST6 (alpha-N-acetyl-neuraminyl-2,3-beta-galactosyl-1,3)-N-acetylgalactosaminide alpha- | CCDS11747.1     | chr17_74562190-74562190_C_T   | 374R>H  | Substitution | Nonsynonymous coding | 29% |
| MM04T | ST6GALNAC6 | ST6 (alpha-N-acetyl-neuraminyl-2,3-beta-galactosyl-1,3)-N-acetylgalactosaminide alpha- | CCDS6882.1      | chr9_130656897-130656897_G_A  | 64A>V   | Substitution | Nonsynonymous coding | 20% |
| MM04T | ST8SIA3    | ST8 alpha-N-acetyl-neuraminide alpha-2,8-sialyltransferase 3                           | CCDS32834.1     | chr18_55027275-55027275_C_A   | 304L>I  | Substitution | Nonsynonymous coding | 30% |
| MM04T | STAB1      | stabilin 1                                                                             | CCDS33768.1     | chr3_52558227-52558227_G_T    | 2552D>Y | Substitution | Nonsynonymous coding | 28% |
| MM04T | STAB2      | stabilin 2                                                                             | CCDS31888.1     | chr12_104048394-104048394_A_G | 490D>G  | Substitution | Nonsynonymous coding | 34% |
| MM04T | STAG1      | stromal antigen 1                                                                      | CCDS3090.1      | chr3_136323304-136323304_C_A  | 48K>N   | Substitution | Nonsynonymous coding | 32% |
| MM04T | STAG2      | stromal antigen 2                                                                      | CCDS43990.1     | chrX_123179106-123179106_A_T  | 185Q>H  | Substitution | Nonsynonymous coding | 14% |
| MM04T | STAG2      | stromal antigen 2                                                                      | CCDS43990.1     | chrX_123185201-123185201_G_T  | 385D>Y  | Substitution | Nonsynonymous coding | 63% |
| MM04T | STAG2      | stromal antigen 2                                                                      | CCDS43990.1     | chrX_123190015-123190015_A_C  | 412N>H  | Substitution | Nonsynonymous coding | 20% |
| MM04T | STAM2      | signal transducing adaptor molecule (SH3 domain and ITAM motif) 2                      | CCDS2196.1      | chr2_152982850-152982850_C_T  | 357A>T  | Substitution | Nonsynonymous coding | 48% |
| MM04T | STAM2      | signal transducing adaptor molecule (SH3 domain and ITAM motif) 2                      | CCDS2196.1      | chr2_153004633-153004633_G_T  | 69L>I   | Substitution | Nonsynonymous coding | 31% |
| MM04T | STAMBPL1   | STAM binding protein-like 1                                                            | CCDS7391.1      | chr10_90674348-90674348_T_A   | 279F>Y  | Substitution | Nonsynonymous coding | 19% |
| MM04T | STAR       | steroidogenic acute regulatory protein                                                 | CCDS6102.1      | chr8_38003614-38003614_C_T    | 173E>K  | Substitution | Nonsynonymous coding | 19% |
| MM04T | STARD4     | StAR-related lipid transfer (START) domain containing 4                                | CCDS4104.1      | chr5_110835805-110835805_C_A  | NA      | Substitution | Splice site acceptor | 27% |
| MM04T | STARD8     | StAR-related lipid transfer (START) domain containing 8                                | CCDS48134.1     | chrX_67943870-67943870_G_A    | 1034G>D | Substitution | Nonsynonymous coding | 18% |
| MM04T | STARD9     | StAR-related lipid transfer (START) domain containing 9                                | NM_020759       | chr15_42977311-42977311_A_C   | 1179T>P | Substitution | Nonsynonymous coding | 33% |
| MM04T | STARD9     | StAR-related lipid transfer (START) domain containing 9                                | NM_020759       | chr15_42978575-42978575_C_A   | 1600S>Y | Substitution | Nonsynonymous coding | 39% |
| MM04T | STAU2      | staufen, RNA binding protein, homolog 2 (Drosophila)                                   | NM_001164380    | chr8_74334858-74334858_G_T    | 537S>Y  | Substitution | Nonsynonymous coding | 27% |
| MM04T | STIL       | SCL/TAL1 interrupting locus                                                            | CCDS41329.1     | chr1_47765576-47765576_C_T    | NA      | Substitution | Splice site donor    | 41% |
| MM04T | STIM1      | stromal interaction molecule 1                                                         | CCDS7749.1      | chr11_4112889-4112889_G_A     | 640R>Q  | Substitution | Nonsynonymous coding | 19% |
| MM04T | STK17A     | serine/threonine kinase 17a                                                            | CCDS5470.1      | chr7_43664298-43664298_G_A    | 368E>K  | Substitution | Nonsynonymous coding | 31% |

|       |               |                                                                            |              |                               |         |              |                      |     |
|-------|---------------|----------------------------------------------------------------------------|--------------|-------------------------------|---------|--------------|----------------------|-----|
| MM04T | STK17B        | serine/threonine kinase 17b                                                | CCDS2315.1   | chr2_197002227-197002227_G_A  | 355R>C  | Substitution | Nonsynonymous coding | 22% |
| MM04T | STK31         | serine/threonine kinase 31                                                 | CCDS5386.1   | chr7_23826152-23826152_A_G    | 767E>G  | Substitution | Nonsynonymous coding | 22% |
| MM04T | STON1-GTF2A1L | STON1-GTF2A1L readthrough                                                  | CCDS1840.1   | chr2_48809217-48809217_T_C    | 482I>T  | Substitution | Nonsynonymous coding | 20% |
| MM04T | STPG1         | sperm-tail PG-rich repeat containing 1                                     | CCDS253.1    | chr1_24696175-24696175_C_A    | 195K>N  | Substitution | Nonsynonymous coding | 32% |
| MM04T | STRBP         | spermatid perinuclear RNA binding protein                                  | CCDS6851.1   | chr9_125936024-125936024_T_G  | 108M>L  | Substitution | Nonsynonymous coding | 32% |
| MM04T | STRIP1        | striatin interacting protein 1                                             | CCDS30798.1  | chr1_110582071-110582071_A_C  | 172N>T  | Substitution | Nonsynonymous coding | 33% |
| MM04T | STX10         | syntaxin 10                                                                | CCDS32922.1  | chr19_13259856-13259856_C_A   | 117R>M  | Substitution | Nonsynonymous coding | 22% |
| MM04T | STX10         | syntaxin 10                                                                | CCDS32922.1  | chr19_13260350-13260350_C_A   | 88R>I   | Substitution | Nonsynonymous coding | 18% |
| MM04T | STX17         | syntaxin 17                                                                | CCDS6745.1   | chr9_102713550-102713550_G_T  | 133R>I  | Substitution | Nonsynonymous coding | 26% |
| MM04T | STX7          | syntaxin 7                                                                 | CCDS5153.1   | chr6_132791127-132791127_A_C  | 167L>R  | Substitution | Nonsynonymous coding | 29% |
| MM04T | STXBP1        | syntaxin binding protein 1                                                 | CCDS6874.1   | chr9_130420666-130420666_T_G  | 61I>S   | Substitution | Nonsynonymous coding | 29% |
| MM04T | STYK1         | serine/threonine/tyrosine kinase 1                                         | CCDS8629.1   | chr12_10772871-10772871_C_A   | 381E>X  | Substitution | Nonsense             | 20% |
| MM04T | SUCO          | SUN domain containing ossification factor                                  | CCDS1303.1   | chr1_172579251-172579251_G_A  | 1206R>Q | Substitution | Nonsynonymous coding | 29% |
| MM04T | SUD53         | suppressor of defective silencing 3 homolog (S. cerevisiae)                | CCDS44993.1  | chr12_118828982-118828982_G_T | 138E>X  | Substitution | Nonsense             | 34% |
| MM04T | SUGP1         | SURP and G patch domain containing 1                                       | CCDS12399.1  | chr19_19427311-19427311_C_A   | 42K>N   | Substitution | Nonsynonymous coding | 24% |
| MM04T | SUGP2         | SURP and G patch domain containing 2                                       | CCDS12392.1  | chr19_19115419-19115419_G_T   | 829F>L  | Substitution | Nonsynonymous coding | 25% |
| MM04T | SULF1         | sulfatase 1                                                                | CCDS6204.1   | chr8_70476278-70476278_C_T    | 23S>L   | Substitution | Nonsynonymous coding | 33% |
| MM04T | SULT1C3       | sulfotransferase family, cytosolic, 1C, member 3                           | CCDS33267.1  | chr2_108869887-108869887_G_T  | 130E>X  | Substitution | Nonsense             | 24% |
| MM04T | SULT1E1       | sulfotransferase family 1E, estrogen-preferring, member 1                  | CCDS3531.1   | chr4_70713477-70713477_G_T    | 177S>Y  | Substitution | Nonsynonymous coding | 18% |
| MM04T | SULT4A1       | sulfotransferase family 4A, member 1                                       | CCDS14051.1  | chr22_44258124-44258124_C_T   | 47D>N   | Substitution | Nonsynonymous coding | 18% |
| MM04T | SULT6B1       | sulfotransferase family, cytosolic, 6B, member 1                           | CCDS33182.1  | chr2_37398583-37398583_G_A    | 221R>C  | Substitution | Nonsynonymous coding | 24% |
| MM04T | SUN1          | Sad1 and UNC84 domain containing 1                                         | CCDS47525.1  | chr7_912948-912948_C_A        | 780H>N  | Substitution | Nonsynonymous coding | 33% |
| MM04T | SUPT20HL2     | suppressor of Ty 20 homolog (S. cerevisiae)-like 2                         | NM_001136233 | chrX_24330937-24330937_G_T    | 166L>I  | Substitution | Nonsynonymous coding | 16% |
| MM04T | SUPV3L1       | suppressor of var1, 3-like 1 (S. cerevisiae)                               | CCDS7287.1   | chr10_70940175-70940175_C_A   | 43S>Y   | Substitution | Nonsynonymous coding | 30% |
| MM04T | SUSD5         | sushi domain containing 5                                                  | CCDS46787.1  | chr3_33194501-33194501_G_T    | 541F>L  | Substitution | Nonsynonymous coding | 24% |
| MM04T | SUV39H1       | suppressor of variegation 3-9 homolog 1 (Drosophila)                       | CCDS14304.1  | chrX_48557311-48557311_A_C    | 13K>T   | Substitution | Nonsynonymous coding | 11% |
| MM04T | SUV420H1      | suppressor of variegation 4-20 homolog 1 (Drosophila)                      | CCDS31623.1  | chr11_67925352-67925352_A_G   | 821Y>H  | Substitution | Nonsynonymous coding | 27% |
| MM04T | SUV420H1      | suppressor of variegation 4-20 homolog 1 (Drosophila)                      | CCDS31623.1  | chr11_67925927-67925927_G_T   | 629S>Y  | Substitution | Nonsynonymous coding | 25% |
| MM04T | SVEP1         | sushi, von Willebrand factor type A, EGF and pentraxin domain containing 1 | CCDS48004.1  | chr9_113139637-113139637_C_T  | 3473R>Q | Substitution | Nonsynonymous coding | 29% |
| MM04T | SVIL          | supervillin                                                                | CCDS7164.1   | chr10_29822347-29822347_G_A   | 317R>X  | Substitution | Nonsense             | 39% |
| MM04T | SVOPL         | SVOP-like                                                                  | CCDS47721.1  | chr7_138344730-138344730_G_T  | 117L>M  | Substitution | Nonsynonymous coding | 20% |
| MM04T | SWT1          | SWT1 RNA endoribonuclease homolog (S. cerevisiae)                          | CCDS1367.1   | chr1_185129981-185129981_G_T  | 3S>I    | Substitution | Nonsynonymous coding | 27% |

|       |         |                                                            |                 |                              |         |              |                      |     |
|-------|---------|------------------------------------------------------------|-----------------|------------------------------|---------|--------------|----------------------|-----|
| MM04T | SWT1    | SWT1 RNA endoribonuclease homolog (S. cerevisiae)          | CCDS1367.1      | chr1_185183670-185183670_A_C | 668K>N  | Substitution | Nonsynonymous coding | 33% |
| MM04T | SYAP1   | synapse associated protein 1                               | CCDS14177.1     | chrX_16754348-16754348_G_T   | 118K>N  | Substitution | Nonsynonymous coding | 23% |
| MM04T | SYCE1L  | synaptonemal complex central element protein 1-like        | CCDS45533.1     | chr16_77242167-77242167_G_A  | NA      | Substitution | Splice site donor    | 19% |
| MM04T | SYCE2   | synaptonemal complex central element protein 2             | CCDS42509.1     | chr19_13030056-13030056_C_T  | NA      | Substitution | Splice site donor    | 31% |
| MM04T | SYCP2   | synaptonemal complex protein 2                             | CCDS13482.1     | chr20_58476852-58476852_C_A  | 349K>N  | Substitution | Nonsynonymous coding | 17% |
| MM04T | SYCP2   | synaptonemal complex protein 2                             | CCDS13482.1     | chr20_58490599-58490599_T_G  | 174K>Q  | Substitution | Nonsynonymous coding | 27% |
| MM04T | SYCP2   | synaptonemal complex protein 2                             | CCDS13482.1     | chr20_58461886-58461886_C_A  | 790E>X  | Substitution | Nonsense             | 19% |
| MM04T | SYDE2   | synapse defective 1, Rho GTPase, homolog 2 (C. elegans)    | CCDS44169.1     | chr1_85648754-85648754_C_T   | 524R>Q  | Substitution | Nonsynonymous coding | 27% |
| MM04T | SYDE2   | synapse defective 1, Rho GTPase, homolog 2 (C. elegans)    | CCDS44169.1     | chr1_85655833-85655833_C_A   | 450E>X  | Substitution | Nonsense             | 23% |
| MM04T | SYN1    | synapsin I                                                 | CCDS14280.1     | chrX_47435923-47435923_C_A   | 318K>N  | Substitution | Nonsynonymous coding | 37% |
| MM04T | SYN2    | synapsin II                                                | ENST00000341648 | chr3_12208742-12208742_C_T   | 261S>L  | Substitution | Nonsynonymous coding | 19% |
| MM04T | SYN3    | synapsin III                                               | CCDS13908.1     | chr22_33265081-33265081_G_A  | 165R>C  | Substitution | Nonsynonymous coding | 31% |
| MM04T | SYNCRIP | synaptotagmin binding, cytoplasmic RNA interacting protein | CCDS5005.1      | chr6_86325058-86325058_C_T   | 430D>N  | Substitution | Nonsynonymous coding | 41% |
| MM04T | SYNCRIP | synaptotagmin binding, cytoplasmic RNA interacting protein | CCDS5005.1      | chr6_86332226-86332226_C_A   | 328D>Y  | Substitution | Nonsynonymous coding | 40% |
| MM04T | SYNE1   | spectrin repeat containing, nuclear envelope 1             | CCDS5236.1      | chr6_152485317-152485317_C_A | 7924R>I | Substitution | Nonsynonymous coding | 30% |
| MM04T | SYNE1   | spectrin repeat containing, nuclear envelope 1             | CCDS5236.1      | chr6_152642435-152642435_A_C | 5392L>V | Substitution | Nonsynonymous coding | 25% |
| MM04T | SYNE1   | spectrin repeat containing, nuclear envelope 1             | CCDS5236.1      | chr6_152644767-152644767_C_T | 5255D>N | Substitution | Nonsynonymous coding | 20% |
| MM04T | SYNE1   | spectrin repeat containing, nuclear envelope 1             | CCDS5236.1      | chr6_152647610-152647610_A_C | 5038F>L | Substitution | Nonsynonymous coding | 14% |
| MM04T | SYNE1   | spectrin repeat containing, nuclear envelope 1             | CCDS5236.1      | chr6_152671455-152671455_G_T | 3917L>M | Substitution | Nonsynonymous coding | 19% |
| MM04T | SYNE1   | spectrin repeat containing, nuclear envelope 1             | CCDS5236.1      | chr6_152804341-152804341_G_T | 410P>H  | Substitution | Nonsynonymous coding | 27% |
| MM04T | SYNE1   | spectrin repeat containing, nuclear envelope 1             | CCDS5236.1      | chr6_152774744-152774744_G_A | 1002R>X | Substitution | Nonsense             | 25% |
| MM04T | SYNE2   | spectrin repeat containing, nuclear envelope 2             | CCDS9761.2      | chr14_64519708-64519708__A   | NA      | Insertion    | Frameshift           | 24% |
| MM04T | SYNE2   | spectrin repeat containing, nuclear envelope 2             | CCDS9761.2      | chr14_64488613-64488613_G_T  | 1797M>I | Substitution | Nonsynonymous coding | 29% |
| MM04T | SYNE2   | spectrin repeat containing, nuclear envelope 2             | CCDS9761.2      | chr14_64492071-64492071_G_T  | 2062E>X | Substitution | Nonsense             | 23% |
| MM04T | SYNJ1   | synaptojanin 1                                             | CCDS33539.1     | chr21_34037251-34037251_T_C  | 759Q>R  | Substitution | Nonsynonymous coding | 10% |
| MM04T | SYNJ1   | synaptojanin 1                                             | CCDS33539.1     | chr21_34038374-34038374_C_T  | 675R>Q  | Substitution | Nonsynonymous coding | 27% |
| MM04T | SYNJ1   | synaptojanin 1                                             | CCDS33539.1     | chr21_34025669-34025669_C_A  | 935E>X  | Substitution | Nonsense             | 32% |
| MM04T | SYNJ2   | synaptojanin 2                                             | CCDS5254.1      | chr6_158507892-158507892_G_A | 1072A>T | Substitution | Nonsynonymous coding | 33% |
| MM04T | SYNM    | synemin, intermediate filament protein                     | ENST00000336292 | chr15_99672165-99672165_G_T  | 1199W>C | Substitution | Nonsynonymous coding | 23% |
| MM04T | SYNPO2  | synaptopodin 2                                             | CCDS34054.1     | chr4_119953152-119953152_C_A | 1074F>L | Substitution | Nonsynonymous coding | 36% |
| MM04T | SYT14   | synaptotagmin XIV                                          | ENST00000399639 | chr4_68928550-68928550_G_T   | 93L>I   | Substitution | Nonsynonymous coding | 41% |
| MM04T | SYT15   | synaptotagmin XV                                           | CCDS44376.1     | chr10_46969397-46969397_T_C  | 22I>V   | Substitution | Nonsynonymous coding | 18% |



|       |          |                                                                                       |                 |                               |         |              |                      |     |
|-------|----------|---------------------------------------------------------------------------------------|-----------------|-------------------------------|---------|--------------|----------------------|-----|
| MM04T | SYTL2    | synaptotagmin-like 2                                                                  | ENST00000359152 | chr11_85439058-85439058_G_T   | 5S>Y    | Substitution | Nonsynonymous coding | 49% |
| MM04T | SYTL2    | synaptotagmin-like 2                                                                  | CCDS31651.1     | chr11_85436218-85436218_C_A   | 428E>X  | Substitution | Nonsense             | 22% |
| MM04T | SYTL2    | synaptotagmin-like 2                                                                  | CCDS31651.1     | chr11_85437493-85437493_C_A   | 3E>X    | Substitution | Nonsense             | 28% |
| MM04T | SYTL2    | synaptotagmin-like 2                                                                  | ENST00000359152 | chr11_85438237-85438237_C_A   | 279E>X  | Substitution | Nonsense             | 32% |
| MM04T | SYTL3    | synaptotagmin-like 3                                                                  | CCDS34563.1     | chr6_159086482-159086482_T_C  | 56W>R   | Substitution | Nonsynonymous coding | 18% |
| MM04T | TAB2     | TGF-beta activated kinase 1/MAP3K7 binding protein 2                                  | CCDS5214.1      | chr6_149730820-149730820_C_T  | 683R>C  | Substitution | Nonsynonymous coding | 34% |
| MM04T | TAB3     | TGF-beta activated kinase 1/MAP3K7 binding protein 3                                  | CCDS14226.1     | chrX_30861155-30861155_G_A    | 606P>S  | Substitution | Nonsynonymous coding | 34% |
| MM04T | TADA1    | transcriptional adaptor 1                                                             | CCDS1255.1      | chr1_166826906-166826906_T_G  | 302E>D  | Substitution | Nonsynonymous coding | 31% |
| MM04T | TAF1     | TAF1 RNA polymerase II, TATA box binding protein (TBP)-associated factor, 250kDa      | CCDS14412.1     | chrX_70626501-70626501_C_T    | 1358R>C | Substitution | Nonsynonymous coding | 39% |
| MM04T | TAF1A    | TATA box binding protein (TBP)-associated factor, RNA polymerase I, A, 48kDa          | CCDS1531.1      | chr1_222750874-222750874_C_T  | 173E>K  | Substitution | Nonsynonymous coding | 32% |
| MM04T | TAF1B    | TATA box binding protein (TBP)-associated factor, RNA polymerase I, B, 63kDa          | CCDS33143.1     | chr2_9989571-9989571__A       | NA      | Insertion    | Frameshift           | 12% |
| MM04T | TAF1B    | TATA box binding protein (TBP)-associated factor, RNA polymerase I, B, 63kDa          | CCDS33143.1     | chr2_9989503-9989503_G_T      | 40R>I   | Substitution | Nonsynonymous coding | 13% |
| MM04T | TAF1L    | TAF1 RNA polymerase II, TATA box binding protein (TBP)-associated factor, 210kDa-like | NM_153809       | chr9_32631814-32631814_C_T    | 1255R>Q | Substitution | Nonsynonymous coding | 25% |
| MM04T | TAF1L    | TAF1 RNA polymerase II, TATA box binding protein (TBP)-associated factor, 210kDa-like | NM_153809       | chr9_32633029-32633029_T_A    | 850K>I  | Substitution | Nonsynonymous coding | 38% |
| MM04T | TAF5     | TAF5 RNA polymerase II, TATA box binding protein (TBP)-associated factor, 100kDa      | CCDS7547.1      | chr10_105147440-105147440_G_T | 724E>X  | Substitution | Nonsense             | 45% |
| MM04T | TAF9     | TAF9 RNA polymerase II, TATA box binding protein (TBP)-associated factor, 32kDa       | CCDS4001.1      | chr5_68662387-68662387_C_A    | 22E>X   | Substitution | Nonsense             | 35% |
| MM04T | TAF9B    | TAF9B RNA polymerase II, TATA box binding protein (TBP)-associated factor, 31kDa      | CCDS35340.1     | chrX_77394369-77394369_A_T    | 35V>D   | Substitution | Nonsynonymous coding | 52% |
| MM04T | TAMM41   | TAM41, mitochondrial translocator assembly and maintenance protein, homolog (S.       | ENST00000444133 | chr3_11849223-11849223_G_T    | 341L>I  | Substitution | Nonsynonymous coding | 23% |
| MM04T | TAMM41   | TAM41, mitochondrial translocator assembly and maintenance protein, homolog (S.       | CCDS2607.1      | chr3_11858803-11858803_G_A    | 191R>W  | Substitution | Nonsynonymous coding | 24% |
| MM04T | TANC1    | tetratricopeptide repeat, ankyrin repeat and coiled-coil containing 1                 | CCDS42766.1     | chr2_160043438-160043438_C_A  | 882S>Y  | Substitution | Nonsynonymous coding | 31% |
| MM04T | TAP1     | transporter 1, ATP-binding cassette, sub-family B (MDR/TAP)                           | CCDS4758.1      | chr6_32818742-32818742_C_A    | 403K>N  | Substitution | Nonsynonymous coding | 54% |
| MM04T | TARS     | threonyl-tRNA synthetase                                                              | CCDS3899.1      | chr5_33445480-33445480_A_C    | 36K>N   | Substitution | Nonsynonymous coding | 24% |
| MM04T | TAS1R3   | taste receptor, type 1, member 3                                                      | CCDS30556.1     | chr1_1269769-1269769_C_A      | 828F>L  | Substitution | Nonsynonymous coding | 23% |
| MM04T | TAS2R16  | taste receptor, type 2, member 16                                                     | CCDS5785.1      | chr7_122635289-122635289_G_T  | 134L>M  | Substitution | Nonsynonymous coding | 37% |
| MM04T | TAS2R42  | taste receptor, type 2, member 42                                                     | CCDS31747.1     | chr12_11339039-11339039_C_A   | 169D>Y  | Substitution | Nonsynonymous coding | 41% |
| MM04T | TAS2R7   | taste receptor, type 2, member 7                                                      | CCDS8631.1      | chr12_10954430-10954430_T_C   | 247Y>C  | Substitution | Nonsynonymous coding | 35% |
| MM04T | TAS2R7   | taste receptor, type 2, member 7                                                      | CCDS8631.1      | chr12_10954796-10954796_C_A   | 125R>I  | Substitution | Nonsynonymous coding | 28% |
| MM04T | TBC1D2   | TBC1 domain family, member 2                                                          | CCDS35080.1     | chr9_100971314-100971314_C_T  | 596E>K  | Substitution | Nonsynonymous coding | 28% |
| MM04T | TBC1D22B | TBC1 domain family, member 22B                                                        | CCDS4832.1      | chr6_37298920-37298920_C_T    | 497A>V  | Substitution | Nonsynonymous coding | 31% |
| MM04T | TBC1D23  | TBC1 domain family, member 23                                                         | CCDS2936.1      | chr3_100039661-100039661_G_T  | 607E>X  | Substitution | Nonsense             | 21% |
| MM04T | TBC1D30  | TBC1 domain family, member 30                                                         | ENST00000229088 | chr12_65268826-65268826_C_A   | 678S>Y  | Substitution | Nonsynonymous coding | 31% |
| MM04T | TBC1D4   | TBC1 domain family, member 4                                                          | CCDS41901.1     | chr13_76055721-76055721_C_A   | 61E>D   | Substitution | Nonsynonymous coding | 22% |

|       |          |                                                                                  |                 |                               |         |              |                      |     |
|-------|----------|----------------------------------------------------------------------------------|-----------------|-------------------------------|---------|--------------|----------------------|-----|
| MM04T | TBC1D8   | TBC1 domain family, member 8 (with GRAM domain)                                  | CCDS46375.1     | chr2_101667028-101667028_C_T  | 221R>Q  | Substitution | Nonsynonymous coding | 35% |
| MM04T | TBC1D8B  | TBC1 domain family, member 8B (with GRAM domain)                                 | CCDS14522.1     | chrX_106066630-106066630_G_T  | 254R>I  | Substitution | Nonsynonymous coding | 16% |
| MM04T | TBCE     | tubulin folding cofactor E                                                       | CCDS1605.1      | chr1_235577788-235577788_A_C  | 76N>H   | Substitution | Nonsynonymous coding | 32% |
| MM04T | TBCEL    | tubulin folding cofactor E-like                                                  | CCDS31692.1     | chr11_120925829-120925829_C_A | 175S>Y  | Substitution | Nonsynonymous coding | 28% |
| MM04T | TBCK     | TBC1 domain containing kinase                                                    | CCDS3673.1      | chr4_107173088-107173088_G_T  | 115P>T  | Substitution | Nonsynonymous coding | 26% |
| MM04T | TBL1XR1  | transducin (beta)-like 1 X-linked receptor 1                                     | CCDS46961.1     | chr3_176767924-176767924_G_A  | 188S>F  | Substitution | Nonsynonymous coding | 23% |
| MM04T | TBL3     | transducin (beta)-like 3                                                         | CCDS10453.1     | chr16_2025538-2025538_C_T     | 272R>C  | Substitution | Nonsynonymous coding | 26% |
| MM04T | TBP      | TATA box binding protein                                                         | CCDS5315.1      | chr6_170873706-170873706_G_A  | 191E>K  | Substitution | Nonsynonymous coding | 35% |
| MM04T | TBP      | TATA box binding protein                                                         | CCDS5315.1      | chr6_170881327-170881327_C_A  | 332L>I  | Substitution | Nonsynonymous coding | 24% |
| MM04T | TBR1     | T-box, brain, 1                                                                  | CCDS33310.1     | chr2_162280636-162280636_G_T  | 649E>D  | Substitution | Nonsynonymous coding | 22% |
| MM04T | TBX19    | T-box 19                                                                         | CCDS1272.1      | chr1_168260583-168260583_A_C  | 130N>T  | Substitution | Nonsynonymous coding | 33% |
| MM04T | TBX19    | T-box 19                                                                         | CCDS1272.1      | chr1_168262449-168262449_G_A  | 179R>Q  | Substitution | Nonsynonymous coding | 22% |
| MM04T | TCEA1    | transcription elongation factor A (SII), 1                                       | CCDS47858.1     | chr8_54897066-54897066_C_A    | 179E>X  | Substitution | Nonsense             | 28% |
| MM04T | TCEAL1   | transcription elongation factor A (SII)-like 1                                   | CCDS35358.1     | chrX_102885100-102885100_G_A  | 86E>K   | Substitution | Nonsynonymous coding | 21% |
| MM04T | TCEAL2   | transcription elongation factor A (SII)-like 2                                   | CCDS14496.1     | chrX_101381954-101381954_G_A  | 51G>D   | Substitution | Nonsynonymous coding | 29% |
| MM04T | TCEAL4   | transcription elongation factor A (SII)-like 4                                   | CCDS14510.2     | chrX_102841986-102841986_G_T  | 128R>I  | Substitution | Nonsynonymous coding | 20% |
| MM04T | TCEAL4   | transcription elongation factor A (SII)-like 4                                   | CCDS14510.2     | chrX_102842075-102842075_G_T  | 158E>X  | Substitution | Nonsense             | 14% |
| MM04T | TCEANC   | transcription elongation factor A (SII) N-terminal and central domain containing | CCDS48081.1     | chrX_13681370-13681370_C_T    | 278T>M  | Substitution | Nonsynonymous coding | 18% |
| MM04T | TCERG1   | transcription elongation regulator 1                                             | CCDS4282.1      | chr5_145883501-145883501_G_T  | 888D>Y  | Substitution | Nonsynonymous coding | 17% |
| MM04T | TCERG1   | transcription elongation regulator 1                                             | CCDS4282.1      | chr5_145886637-145886637_G_A  | 926R>Q  | Substitution | Nonsynonymous coding | 16% |
| MM04T | TCF20    | transcription factor 20 (AR1)                                                    | CCDS14033.1     | chr22_42565883-42565883_C_A   | 1923E>D | Substitution | Nonsynonymous coding | 24% |
| MM04T | TCF4     | transcription factor 4                                                           | CCDS42438.1     | chr18_53128297-53128297_C_T   | 86G>E   | Substitution | Nonsynonymous coding | 24% |
| MM04T | TCF4     | transcription factor 4                                                           | CCDS42438.1     | chr18_53254287-53254287_C_T   | 21D>N   | Substitution | Nonsynonymous coding | 25% |
| MM04T | TCF7L2   | transcription factor 7-like 2 (T-cell specific, HMG-box)                         | CCDS7576.1      | chr10_114711306-114711306_G_T | 107M>I  | Substitution | Nonsynonymous coding | 22% |
| MM04T | TCF7L2   | transcription factor 7-like 2 (T-cell specific, HMG-box)                         | CCDS7576.1      | chr10_114911535-114911535_G_T | 328K>N  | Substitution | Nonsynonymous coding | 21% |
| MM04T | TCHH     | trichohyalin                                                                     | CCDS41396.1     | chr1_152081894-152081894_G_T  | 1267L>M | Substitution | Nonsynonymous coding | 32% |
| MM04T | TCHH     | trichohyalin                                                                     | CCDS41396.1     | chr1_152086421-152086421_G_A  | 46R>W   | Substitution | Nonsynonymous coding | 35% |
| MM04T | TCP11L2  | t-complex 11, testis-specific-like 2                                             | CCDS9104.1      | chr12_106715304-106715304_G_A | 152R>H  | Substitution | Nonsynonymous coding | 27% |
| MM04T | TCTEX1D2 | Tctex1 domain containing 2                                                       | CCDS33929.1     | chr3_196033829-196033829_C_A  | 101R>I  | Substitution | Nonsynonymous coding | 28% |
| MM04T | TDRD1    | tudor domain containing 1                                                        | CCDS7588.1      | chr10_115947709-115947709_C_A | 40S>Y   | Substitution | Nonsynonymous coding | 25% |
| MM04T | TDRD1    | tudor domain containing 1                                                        | CCDS7588.1      | chr10_115970346-115970346_C_A | 464P>H  | Substitution | Nonsynonymous coding | 19% |
| MM04T | TDRD15   | tudor domain containing 15                                                       | ENST00000405799 | chr2_21361432-21361432_G_A    | 365D>N  | Substitution | Nonsynonymous coding | 28% |

|       |        |                                                |                 |                               |         |              |                      |     |
|-------|--------|------------------------------------------------|-----------------|-------------------------------|---------|--------------|----------------------|-----|
| MM04T | TDRD15 | tudor domain containing 15                     | ENST00000405799 | chr2_21362186-21362186_T_A    | 616F>Y  | Substitution | Nonsynonymous coding | 33% |
| MM04T | TDRD15 | tudor domain containing 15                     | ENST00000405799 | chr2_21364080-21364080_G_T    | 1247E>D | Substitution | Nonsynonymous coding | 28% |
| MM04T | TDRD7  | tudor domain containing 7                      | CCDS6725.1      | chr9_100193285-100193285_C_A  | 93S>Y   | Substitution | Nonsynonymous coding | 29% |
| MM04T | TDRD7  | tudor domain containing 7                      | CCDS6725.1      | chr9_100194358-100194358_T_C  | 134V>A  | Substitution | Nonsynonymous coding | 21% |
| MM04T | TEAD2  | TEA domain family member 2                     | CCDS12761.1     | chr19_49858456-49858456_T_G   | 159E>A  | Substitution | Nonsynonymous coding | 31% |
| MM04T | TEAD4  | TEA domain family member 4                     | CCDS41737.1     | chr12_3149557-3149557_G_T     | 277E>D  | Substitution | Nonsynonymous coding | 26% |
| MM04T | TEC    | tec protein tyrosine kinase                    | CCDS3481.1      | chr4_48139450-48139450_C_A    | 627E>X  | Substitution | Nonsense             | 25% |
| MM04T | TECPR1 | tectonin beta-propeller repeat containing 1    | CCDS47648.1     | chr7_97875349-97875349_C_T    | 37R>H   | Substitution | Nonsynonymous coding | 18% |
| MM04T | TECTA  | tectorin alpha                                 | CCDS8434.1      | chr11_121000423-121000423_C_T | 815T>M  | Substitution | Nonsynonymous coding | 23% |
| MM04T | TECTA  | tectorin alpha                                 | CCDS8434.1      | chr11_121028872-121028872_C_T | 1543S>L | Substitution | Nonsynonymous coding | 20% |
| MM04T | TEDDM1 | transmembrane epididymal protein 1             | CCDS30953.1     | chr1_182368964-182368964_G_T  | 219F>L  | Substitution | Nonsynonymous coding | 24% |
| MM04T | TEFM   | transcription elongation factor, mitochondrial | CCDS42291.1     | chr17_29226197-29226197_G_T   | 358S>Y  | Substitution | Nonsynonymous coding | 19% |
| MM04T | TENM1  | teneurin transmembrane protein 1               | CCDS14609.1     | chrX_123517636-123517636_T_C  | 2375Q>R | Substitution | Nonsynonymous coding | 20% |
| MM04T | TENM1  | teneurin transmembrane protein 1               | CCDS14609.1     | chrX_123518682-123518682_A_C  | 2026I>M | Substitution | Nonsynonymous coding | 12% |
| MM04T | TENM1  | teneurin transmembrane protein 1               | CCDS14609.1     | chrX_123539096-123539096_G_A  | 1719R>W | Substitution | Nonsynonymous coding | 35% |
| MM04T | TENM1  | teneurin transmembrane protein 1               | CCDS14609.1     | chrX_123554354-123554354_G_A  | 1590R>C | Substitution | Nonsynonymous coding | 32% |
| MM04T | TENM1  | teneurin transmembrane protein 1               | CCDS14609.1     | chrX_123654439-123654439_G_T  | 1077L>I | Substitution | Nonsynonymous coding | 34% |
| MM04T | TENM2  | teneurin transmembrane protein 2               | NM_001122679    | chr5_167545300-167545300_C_T  | 606A>V  | Substitution | Nonsynonymous coding | 33% |
| MM04T | TENM2  | teneurin transmembrane protein 2               | NM_001122679    | chr5_167645405-167645405_G_T  | 1494Q>H | Substitution | Nonsynonymous coding | 28% |
| MM04T | TENM2  | teneurin transmembrane protein 2               | NM_001122679    | chr5_167638746-167638746_G_T  | 1269E>X | Substitution | Nonsense             | 44% |
| MM04T | TENM3  | teneurin transmembrane protein 3               | CCDS47165.1     | chr4_183267917-183267917_T_G  | 116S>A  | Substitution | Nonsynonymous coding | 38% |
| MM04T | TENM3  | teneurin transmembrane protein 3               | CCDS47165.1     | chr4_183717814-183717814_T_G  | 2413F>C | Substitution | Nonsynonymous coding | 36% |
| MM04T | TENM4  | teneurin transmembrane protein 4               | CCDS44688.1     | chr11_78423578-78423578_G_A   | 1335R>C | Substitution | Nonsynonymous coding | 36% |
| MM04T | TEP1   | telomerase-associated protein 1                | CCDS9548.1      | chr14_20853258-20853258_T_C   | 998Y>C  | Substitution | Nonsynonymous coding | 38% |
| MM04T | TEP1   | telomerase-associated protein 1                | CCDS9548.1      | chr14_20869271-20869271_C_T   | 474R>Q  | Substitution | Nonsynonymous coding | 35% |
| MM04T | TES    | testis derived transcript (3 LIM domains)      | CCDS5763.1      | chr7_115850785-115850785_G_T  | 8K>N    | Substitution | Nonsynonymous coding | 24% |
| MM04T | TESC   | tescalcin                                      | CCDS9183.2      | chr12_117513077-117513077_G_A | 96R>C   | Substitution | Nonsynonymous coding | 25% |
| MM04T | TET1   | tet methylcytosine dioxygenase 1               | CCDS7281.1      | chr10_70332695-70332695_G_T   | 200K>N  | Substitution | Nonsynonymous coding | 36% |
| MM04T | TET1   | tet methylcytosine dioxygenase 1               | CCDS7281.1      | chr10_70332922-70332922_G_A   | 276R>Q  | Substitution | Nonsynonymous coding | 33% |
| MM04T | TET1   | tet methylcytosine dioxygenase 1               | CCDS7281.1      | chr10_70405912-70405912_A_C   | 1142Q>H | Substitution | Nonsynonymous coding | 37% |
| MM04T | TET1   | tet methylcytosine dioxygenase 1               | CCDS7281.1      | chr10_70441163-70441163_A_G   | 1611N>S | Substitution | Nonsynonymous coding | 19% |
| MM04T | TET2   | tet methylcytosine dioxygenase 2               | CCDS47120.1     | chr4_106197675-106197675_G_T  | 2003*>L | Substitution | Nonsynonymous coding | 31% |

|       |          |                                                                                                                                                             |                 |                              |         |              |                      |     |
|-------|----------|-------------------------------------------------------------------------------------------------------------------------------------------------------------|-----------------|------------------------------|---------|--------------|----------------------|-----|
| MM04T | TEX10    | testis expressed 10                                                                                                                                         | CCDS6748.1      | chr9_103102539-103102539_C_A | 417S>I  | Substitution | Nonsynonymous coding | 26% |
| MM04T | TEX11    | testis expressed 11                                                                                                                                         | CCDS35323.1     | chrX_69826850-69826850_C_A   | 652D>Y  | Substitution | Nonsynonymous coding | 19% |
| MM04T | TEX11    | testis expressed 11                                                                                                                                         | CCDS35323.1     | chrX_69945124-69945124_C_A   | 320E>X  | Substitution | Nonsense             | 16% |
| MM04T | TEX13A   | testis expressed 13A                                                                                                                                        | ENST00000413579 | chrX_104464065-104464065_C_T | 271E>K  | Substitution | Nonsynonymous coding | 22% |
| MM04T | TEX14    | testis expressed 14                                                                                                                                         | CCDS32693.1     | chr17_56649433-56649433_A_C  | 1229F>C | Substitution | Nonsynonymous coding | 20% |
| MM04T | TEX14    | testis expressed 14                                                                                                                                         | CCDS32693.1     | chr17_56688673-56688673_C_A  | 345E>X  | Substitution | Nonsense             | 21% |
| MM04T | TEX15    | testis expressed 15                                                                                                                                         | CCDS6080.1      | chr8_30694699-30694699_A_G   | 2651L>S | Substitution | Nonsynonymous coding | 33% |
| MM04T | TEX15    | testis expressed 15                                                                                                                                         | CCDS6080.1      | chr8_30695125-30695125_G_A   | 2509S>L | Substitution | Nonsynonymous coding | 27% |
| MM04T | TEX19    | testis expressed 19                                                                                                                                         | CCDS11809.1     | chr17_80320120-80320120_A_C  | 32S>R   | Substitution | Nonsynonymous coding | 18% |
| MM04T | TEX2     | testis expressed 2 [Source:HGNC Symbol;Acc:30884]                                                                                                           | CCDS11658.1     | chr17_62265791-62265791_C_T  | 728V>I  | Substitution | Nonsynonymous coding | 31% |
| MM04T | TEX35    | testis expressed 35                                                                                                                                         | CCDS1323.1      | chr1_178489560-178489560_G_T | 110K>N  | Substitution | Nonsynonymous coding | 22% |
| MM04T | TFAP2C   | transcription factor AP-2 gamma (activating enhancer binding protein 2 gamma)                                                                               | CCDS13454.1     | chr20_55209214-55209214_C_T  | 271S>L  | Substitution | Nonsynonymous coding | 36% |
| MM04T | TFAP2D   | transcription factor AP-2 delta (activating enhancer binding protein 2 delta)                                                                               | CCDS4933.1      | chr6_50712897-50712897_C_T   | 321L>F  | Substitution | Nonsynonymous coding | 18% |
| MM04T | TFAP2D   | transcription factor AP-2 delta (activating enhancer binding protein 2 delta)                                                                               | CCDS4933.1      | chr6_50712891-50712891_G_T   | 319E>X  | Substitution | Nonsense             | 18% |
| MM04T | TFAP2E   | transcription factor AP-2 epsilon (activating enhancer binding protein 2 epsilon)                                                                           | CCDS393.2       | chr1_36053963-36053963_G_T   | 199A>S  | Substitution | Nonsynonymous coding | 20% |
| MM04T | TFB2M    | transcription factor B2, mitochondrial                                                                                                                      | CCDS1627.1      | chr1_246720809-246720809_G_T | 144L>I  | Substitution | Nonsynonymous coding | 20% |
| MM04T | TFCP2    | transcription factor CP2                                                                                                                                    | CCDS8808.1      | chr12_51500392-51500392_G_T  | 278S>Y  | Substitution | Nonsynonymous coding | 21% |
| MM04T | TFCP2L1  | transcription factor CP2-like 1                                                                                                                             | CCDS2134.1      | chr2_121991760-121991760_G_A | 369P>S  | Substitution | Nonsynonymous coding | 39% |
| MM04T | T FDP3   | transcription factor Dp family, member 3                                                                                                                    | CCDS14636.2     | chrX_132352030-132352030_C_A | 86Q>H   | Substitution | Nonsynonymous coding | 31% |
| MM04T | TFE3     | transcription factor binding to IGHM enhancer 3                                                                                                             | CCDS14315.3     | chrX_48898016-48898016_C_T   | 66E>K   | Substitution | Nonsynonymous coding | 39% |
| MM04T | TFEC     | transcription factor EC                                                                                                                                     | CCDS5762.1      | chr7_115580925-115580925_C_T | 242D>N  | Substitution | Nonsynonymous coding | 33% |
| MM04T | TFPI     | tissue factor pathway inhibitor (lipoprotein-associated coagulation inhibitor)                                                                              | CCDS2294.1      | chr2_188332523-188332523_G_T | 255N>K  | Substitution | Nonsynonymous coding | 39% |
| MM04T | TFPI2    | tissue factor pathway inhibitor 2                                                                                                                           | CCDS5632.1      | chr7_93518351-93518351_C_A   | 152K>N  | Substitution | Nonsynonymous coding | 35% |
| MM04T | TG       | thyroglobulin                                                                                                                                               | CCDS34944.1     | chr8_133898716-133898716_G_A | 367E>K  | Substitution | Nonsynonymous coding | 20% |
| MM04T | TGFB11   | transforming growth factor beta 1 induced transcript 1                                                                                                      | CCDS42156.1     | chr16_31485002-31485002_G_T  | NA      | Substitution | Splice site acceptor | 36% |
| MM04T | TGFBI    | transforming growth factor, beta-induced, 68kDa                                                                                                             | CCDS47266.1     | chr5_135391405-135391405_G_A | 483D>N  | Substitution | Nonsynonymous coding | 19% |
| MM04T | TGFBR3   | transforming growth factor, beta receptor III                                                                                                               | CCDS30770.1     | chr1_92181891-92181891_T_G   | 590N>H  | Substitution | Nonsynonymous coding | 31% |
| MM04T | TGFBRAP1 | transforming growth factor, beta receptor associated protein 1                                                                                              | CCDS2067.1      | chr2_105885896-105885896_C_T | 747E>K  | Substitution | Nonsynonymous coding | 32% |
| MM04T | TGIF1    | TGFB-induced factor homeobox 1                                                                                                                              | CCDS11834.1     | chr18_3456370-3456370_G_A    | 141G>D  | Substitution | Nonsynonymous coding | 28% |
| MM04T | TGM1     | transglutaminase 1 (K polypeptide epidermal type I, protein-glutamine-gamma-transglutaminase 3 (E polypeptide, protein-glutamine-gamma-glutamyltransferase) | CCDS9622.1      | chr14_24729217-24729217_G_T  | 269L>I  | Substitution | Nonsynonymous coding | 20% |
| MM04T | TGM3     | transglutaminase 3 (E polypeptide, protein-glutamine-gamma-glutamyltransferase)                                                                             | CCDS33435.1     | chr20_2308885-2308885_G_A    | 403D>N  | Substitution | Nonsynonymous coding | 34% |
| MM04T | TGM3     | transglutaminase 3 (E polypeptide, protein-glutamine-gamma-glutamyltransferase)                                                                             | CCDS33435.1     | chr20_2315797-2315797_T_C    | 560Y>H  | Substitution | Nonsynonymous coding | 17% |

|       |        |                                                              |                 |                               |         |              |                      |     |
|-------|--------|--------------------------------------------------------------|-----------------|-------------------------------|---------|--------------|----------------------|-----|
| MM04T | TGM4   | transglutaminase 4 (prostate)                                | CCDS2723.1      | chr3_44951595-44951595_G_T    | 447E>D  | Substitution | Nonsynonymous coding | 20% |
| MM04T | TGM5   | transglutaminase 5                                           | CCDS32212.1     | chr15_43531034-43531034_C_A   | 442E>D  | Substitution | Nonsynonymous coding | 37% |
| MM04T | TGM7   | transglutaminase 7                                           | CCDS32213.1     | chr15_43571350-43571350_C_A   | 602D>Y  | Substitution | Nonsynonymous coding | 11% |
| MM04T | TH     | tyrosine hydroxylase                                         | CCDS7731.1      | chr11_2189843-2189843_C_T     | 153R>Q  | Substitution | Nonsynonymous coding | 14% |
| MM04T | THAP6  | THAP domain containing 6                                     | CCDS3568.1      | chr4_76440715-76440715_C_T    | 18S>L   | Substitution | Nonsynonymous coding | 30% |
| MM04T | THBS2  | thrombospondin 2                                             | CCDS34574.1     | chr6_169632281-169632281_C_T  | 649E>K  | Substitution | Nonsynonymous coding | 32% |
| MM04T | THBS3  | thrombospondin 3                                             | CCDS1099.1      | chr1_155173028-155173028_C_A  | 248D>Y  | Substitution | Nonsynonymous coding | 32% |
| MM04T | THEM4  | thioesterase superfamily member 4                            | CCDS1006.1      | chr1_151867487-151867487_G_T  | 95L>I   | Substitution | Nonsynonymous coding | 15% |
| MM04T | THEMIS | thymocyte selection associated                               | CCDS34534.1     | chr6_128150816-128150816_C_A  | 172E>X  | Substitution | Nonsense             | 31% |
| MM04T | THEMIS | thymocyte selection associated                               | CCDS34534.1     | chr6_128150906-128150906_C_A  | 142E>X  | Substitution | Nonsense             | 26% |
| MM04T | THNSL1 | threonine synthase-like 1 (S. cerevisiae)                    | CCDS7147.1      | chr10_25312197-25312197_G_T   | 15Q>H   | Substitution | Nonsynonymous coding | 20% |
| MM04T | THNSL2 | threonine synthase-like 2 (S. cerevisiae)                    | CCDS2002.2      | chr2_88482310-88482310_G_A    | 299D>N  | Substitution | Nonsynonymous coding | 31% |
| MM04T | THOC2  | THO complex 2                                                | CCDS43988.1     | chrX_122805548-122805548_A_G  | 278L>P  | Substitution | Nonsynonymous coding | 17% |
| MM04T | THOC7  | THO complex 7 homolog (Drosophila)                           | CCDS2900.1      | chr3_63824159-63824159_G_A    | 52R>C   | Substitution | Nonsynonymous coding | 16% |
| MM04T | THRAP3 | thyroid hormone receptor associated protein 3                | CCDS405.1       | chr1_36754784-36754784_G_T    | 388M>I  | Substitution | Nonsynonymous coding | 30% |
| MM04T | THRB   | thyroid hormone receptor, beta                               | CCDS2641.1      | chr3_24164533-24164533_G_A    | 410R>X  | Substitution | Nonsense             | 36% |
| MM04T | THSD7B | thrombospondin, type I, domain containing 7B                 | ENST00000272643 | chr2_137814764-137814764_C_T  | 305S>L  | Substitution | Nonsynonymous coding | 19% |
| MM04T | THSD7B | thrombospondin, type I, domain containing 7B                 | ENST00000272643 | chr2_138000044-138000044_G_A  | 723R>Q  | Substitution | Nonsynonymous coding | 30% |
| MM04T | THUMP3 | THUMP domain containing 3                                    | CCDS2573.1      | chr3_9406812-9406812_G_T      | 20Q>H   | Substitution | Nonsynonymous coding | 25% |
| MM04T | TIA1   | TIA1 cytotoxic granule-associated RNA binding protein        | CCDS1901.1      | chr2_70457941-70457941_G_A    | 57R>C   | Substitution | Nonsynonymous coding | 23% |
| MM04T | TIA1   | TIA1 cytotoxic granule-associated RNA binding protein        | CCDS1901.1      | chr2_70443374-70443374_G_A    | 244R>X  | Substitution | Nonsense             | 23% |
| MM04T | TIA1   | TIA1 cytotoxic granule-associated RNA binding protein        | CCDS1901.1      | chr2_70454919-70454919_C_A    | 116E>X  | Substitution | Nonsense             | 22% |
| MM04T | TIAL1  | TIA1 cytotoxic granule-associated RNA binding protein-like 1 | CCDS31295.1     | chr10_121339503-121339503_C_A | 148D>Y  | Substitution | Nonsynonymous coding | 23% |
| MM04T | TIAM1  | T-cell lymphoma invasion and metastasis 1                    | CCDS13609.1     | chr21_32526629-32526629_G_A   | 1036S>L | Substitution | Nonsynonymous coding | 30% |
| MM04T | TIAM1  | T-cell lymphoma invasion and metastasis 1                    | CCDS13609.1     | chr21_32559367-32559367_C_T   | 871R>Q  | Substitution | Nonsynonymous coding | 24% |
| MM04T | TIAM1  | T-cell lymphoma invasion and metastasis 1                    | CCDS13609.1     | chr21_32638679-32638679_C_T   | 204E>K  | Substitution | Nonsynonymous coding | 22% |
| MM04T | TIAM2  | T-cell lymphoma invasion and metastasis 2                    | CCDS34558.1     | chr6_155465774-155465774_G_T  | 555K>N  | Substitution | Nonsynonymous coding | 40% |
| MM04T | TIAM2  | T-cell lymphoma invasion and metastasis 2                    | CCDS34558.1     | chr6_155565208-155565208_G_T  | 1138D>Y | Substitution | Nonsynonymous coding | 22% |
| MM04T | TIAM2  | T-cell lymphoma invasion and metastasis 2                    | CCDS34558.1     | chr6_155565808-155565808_G_A  | 1145G>E | Substitution | Nonsynonymous coding | 23% |
| MM04T | TICRR  | TOPBP1-interacting checkpoint and replication regulator      | CCDS10352.2     | chr15_90152048-90152048_C_T   | 913R>X  | Substitution | Nonsense             | 37% |
| MM04T | TIGD4  | tigger transposable element derived 4                        | CCDS34079.1     | chr4_153691967-153691967_G_T  | 64L>I   | Substitution | Nonsynonymous coding | 41% |
| MM04T | TIGD6  | tigger transposable element derived 6                        | CCDS4301.1      | chr5_149375524-149375524_G_A  | 130R>C  | Substitution | Nonsynonymous coding | 30% |

|       |          |                                                                        |                 |                               |         |              |                      |     |
|-------|----------|------------------------------------------------------------------------|-----------------|-------------------------------|---------|--------------|----------------------|-----|
| MM04T | TIGD7    | tigger transposable element derived 7                                  | CCDS10500.1     | chr16_3349411-3349411_G_T     | 402L>I  | Substitution | Nonsynonymous coding | 33% |
| MM04T | TIGD7    | tigger transposable element derived 7                                  | CCDS10500.1     | chr16_3350489-3350489_A_C     | 42F>L   | Substitution | Nonsynonymous coding | 34% |
| MM04T | TIMELESS | timeless circadian clock                                               | CCDS8918.1      | chr12_56822139-56822139_G_A   | 487R>X  | Substitution | Nonsense             | 29% |
| MM04T | TIRAP    | toll-interleukin 1 receptor (TIR) domain containing adaptor protein    | CCDS41731.1     | chr11_126162698-126162698_G_A | 132E>K  | Substitution | Nonsynonymous coding | 31% |
| MM04T | TJP1     | tight junction protein 1                                               | CCDS42007.1     | chr15_30011117-30011117_G_A   | 1077R>C | Substitution | Nonsynonymous coding | 30% |
| MM04T | TKT      | transketolase                                                          | CCDS2871.1      | chr3_53262293-53262293_T_G    | 493K>T  | Substitution | Nonsynonymous coding | 18% |
| MM04T | TKTL1    | transketolase-like 1                                                   | CCDS35448.1     | chrX_153549231-153549231_T_G  | 386I>S  | Substitution | Nonsynonymous coding | 27% |
| MM04T | TLE2     | transducin-like enhancer of split 2 (E(sp1) homolog, Drosophila)       | CCDS45911.1     | chr19_3028735-3028735_C_A     | 31E>X   | Substitution | Nonsense             | 13% |
| MM04T | TLE3     | transducin-like enhancer of split 3 (E(sp1) homolog, Drosophila)       | CCDS45293.1     | chr15_70356794-70356794_G_A   | 198A>V  | Substitution | Nonsynonymous coding | 25% |
| MM04T | TLL1     | tolloid-like 1                                                         | CCDS3811.1      | chr4_166986953-166986953_G_T  | 709R>I  | Substitution | Nonsynonymous coding | 30% |
| MM04T | TLN1     | talin 1                                                                | CCDS35009.1     | chr9_35707366-35707366_A_C    | 1584I>M | Substitution | Nonsynonymous coding | 34% |
| MM04T | TLN2     | talin 2                                                                | CCDS32261.1     | chr15_63084892-63084892_T_C   | 1930F>S | Substitution | Nonsynonymous coding | 28% |
| MM04T | TLR10    | toll-like receptor 10                                                  | CCDS3445.1      | chr4_38775618-38775618_T_G    | 532N>H  | Substitution | Nonsynonymous coding | 35% |
| MM04T | TLR10    | toll-like receptor 10                                                  | CCDS3445.1      | chr4_38774898-38774898_G_A    | 772R>X  | Substitution | Nonsense             | 30% |
| MM04T | TLR3     | toll-like receptor 3                                                   | CCDS3846.1      | chr4_187004021-187004021_G_A  | 394R>Q  | Substitution | Nonsynonymous coding | 39% |
| MM04T | TLR4     | toll-like receptor 4                                                   | CCDS6818.1      | chr9_120475851-120475851_C_A  | 482S>Y  | Substitution | Nonsynonymous coding | 32% |
| MM04T | TLR7     | toll-like receptor 7                                                   | CCDS14151.1     | chrX_12905805-12905805_G_T    | 726K>N  | Substitution | Nonsynonymous coding | 19% |
| MM04T | TLR8     | toll-like receptor 8                                                   | CCDS14152.1     | chrX_12937997-12937997_C_T    | 280R>C  | Substitution | Nonsynonymous coding | 32% |
| MM04T | TLR8     | toll-like receptor 8                                                   | CCDS14152.1     | chrX_12940280-12940280_T_C    | 1041Y>H | Substitution | Nonsynonymous coding | 38% |
| MM04T | TLR8     | toll-like receptor 8                                                   | CCDS14152.1     | chrX_12937491-12937491_C_A    | 111S>X  | Substitution | Nonsense             | 18% |
| MM04T | TM4SF1   | transmembrane 4 L six family member 1                                  | ENST00000383054 | chr3_149087582-149087582_T_G  | 226I>L  | Substitution | Nonsynonymous coding | 31% |
| MM04T | TM9SF1   | transmembrane 9 superfamily member 1                                   | CCDS9617.1      | chr14_24663920-24663920_C_A   | 102E>D  | Substitution | Nonsynonymous coding | 21% |
| MM04T | TM9SF4   | transmembrane 9 superfamily protein member 4                           | CCDS13196.2     | chr20_30733188-30733188_C_A   | 282S>Y  | Substitution | Nonsynonymous coding | 33% |
| MM04T | TMA16    | translation machinery associated 16 homolog (S. cerevisiae)            | CCDS43278.1     | chr4_164440490-164440490_T_C  | 146W>R  | Substitution | Nonsynonymous coding | 44% |
| MM04T | TMA16    | translation machinery associated 16 homolog (S. cerevisiae)            | CCDS43278.1     | chr4_164440507-164440507_G_T  | 151K>N  | Substitution | Nonsynonymous coding | 38% |
| MM04T | TMC3     | transmembrane channel-like 3                                           | CCDS45324.1     | chr15_81627313-81627313_C_T   | 736R>Q  | Substitution | Nonsynonymous coding | 34% |
| MM04T | TMC4     | transmembrane channel-like 4                                           | CCDS46174.1     | chr19_54666840-54666840_T_A   | 450N>Y  | Substitution | Nonsynonymous coding | 24% |
| MM04T | TMC7     | transmembrane channel-like 7                                           | CCDS10573.1     | chr16_19058543-19058543_A_G   | 571K>R  | Substitution | Nonsynonymous coding | 30% |
| MM04T | TMCC3    | transmembrane and coiled-coil domain family 3                          | CCDS31877.1     | chr12_94976130-94976130_G_A   | 88S>L   | Substitution | Nonsynonymous coding | 19% |
| MM04T | TMCO2    | transmembrane and coiled-coil domains 2                                | CCDS30684.1     | chr1_40717133-40717133_A_C    | 139K>T  | Substitution | Nonsynonymous coding | 29% |
| MM04T | TMEFF2   | transmembrane protein with EGF-like and two follistatin-like domains 2 | CCDS2314.1      | chr2_193056685-193056685_A_G  | 68L>P   | Substitution | Nonsynonymous coding | 30% |
| MM04T | TMEM108  | transmembrane protein 108                                              | CCDS33858.1     | chr3_133109181-133109181_A_G  | v       | Substitution | Splice site donor    | 38% |

|       |           |                                                |             |                               |        |              |                      |     |
|-------|-----------|------------------------------------------------|-------------|-------------------------------|--------|--------------|----------------------|-----|
| MM04T | TMEM132B  | transmembrane protein 132B                     | CCDS41859.1 | chr12_125811224-125811224_C_T | NA     | Substitution | Splice site donor    | 34% |
| MM04T | TMEM132B  | transmembrane protein 132B                     | CCDS41859.1 | chr12_125834714-125834714_G_T | 257E>X | Substitution | Nonsense             | 30% |
| MM04T | TMEM132D  | transmembrane protein 132D                     | CCDS9266.1  | chr12_129559527-129559527_G_T | 731F>L | Substitution | Nonsynonymous coding | 27% |
| MM04T | TMEM132D  | transmembrane protein 132D                     | CCDS9266.1  | chr12_130184644-130184644_A_T | 227Y>N | Substitution | Nonsynonymous coding | 14% |
| MM04T | TMEM132E  | transmembrane protein 132E                     | CCDS11283.1 | chr17_32953155-32953155_G_A   | 26R>H  | Substitution | Nonsynonymous coding | 32% |
| MM04T | TMEM133   | transmembrane protein 133                      | CCDS8309.1  | chr11_100863094-100863094_G_A | 19E>K  | Substitution | Nonsynonymous coding | 32% |
| MM04T | TMEM133   | transmembrane protein 133                      | CCDS8309.1  | chr11_100863245-100863245_T_G | 69F>C  | Substitution | Nonsynonymous coding | 35% |
| MM04T | TMEM164   | transmembrane protein 164                      | CCDS14550.2 | chrX_109310581-109310581_C_A  | 133L>I | Substitution | Nonsynonymous coding | 20% |
| MM04T | TMEM17    | transmembrane protein 17                       | CCDS1871.1  | chr2_62728565-62728565_G_T    | 126L>I | Substitution | Nonsynonymous coding | 43% |
| MM04T | TMEM17    | transmembrane protein 17                       | CCDS1871.1  | chr2_62729884-62729884_A_C    | 49F>C  | Substitution | Nonsynonymous coding | 26% |
| MM04T | TMEM19    | transmembrane protein 19                       | CCDS9002.1  | chr12_72094678-72094678_A_C   | 305K>T | Substitution | Nonsynonymous coding | 26% |
| MM04T | TMEM190   | transmembrane protein 190                      | CCDS33113.1 | chr19_55889488-55889488_G_T   | 151E>X | Substitution | Nonsense             | 13% |
| MM04T | TMEM194B  | transmembrane protein 194B                     | CCDS46476.1 | chr2_191390102-191390102_G_A  | 34R>C  | Substitution | Nonsynonymous coding | 27% |
| MM04T | TMEM198   | transmembrane protein 198                      | CCDS33385.1 | chr2_220412363-220412363_G_A  | 101G>D | Substitution | Nonsynonymous coding | 21% |
| MM04T | TMEM209   | transmembrane protein 209                      | CCDS47712.1 | chr7_129841775-129841775_C_T  | 163S>N | Substitution | Nonsynonymous coding | 26% |
| MM04T | TMEM212   | transmembrane protein 212                      | CCDS46958.1 | chr3_171571420-171571420_C_A  | 108S>X | Substitution | Nonsense             | 34% |
| MM04T | TMEM232   | transmembrane protein 232                      | CCDS47253.1 | chr5_109963542-109963542_G_T  | 181L>M | Substitution | Nonsynonymous coding | 25% |
| MM04T | TMEM244   | transmembrane protein 244                      | CCDS34536.1 | chr6_130166959-130166959_G_T  | 24F>L  | Substitution | Nonsynonymous coding | 21% |
| MM04T | TMEM255A  | transmembrane protein 255A                     | CCDS14597.1 | chrX_119445116-119445116_C_A  | 17D>Y  | Substitution | Nonsynonymous coding | 18% |
| MM04T | TMEM257   | transmembrane protein 257                      | CCDS14681.1 | chrX_144909473-144909473_G_T  | 93R>I  | Substitution | Nonsynonymous coding | 24% |
| MM04T | TMEM35    | transmembrane protein 35                       | CCDS14478.1 | chrX_100334017-100334017_T_G  | 9I>S   | Substitution | Nonsynonymous coding | 28% |
| MM04T | TMEM45A   | transmembrane protein 45A                      | CCDS2937.1  | chr3_100295842-100295842_G_T  | 270E>X | Substitution | Nonsense             | 33% |
| MM04T | TMEM66    | transmembrane protein 66                       | CCDS6074.1  | chr8_29927560-29927560_C_T    | 100D>N | Substitution | Nonsynonymous coding | 29% |
| MM04T | TMEM72    | transmembrane protein 72                       | CCDS41504.1 | chr10_45430317-45430317_G_T   | 188S>I | Substitution | Nonsynonymous coding | 27% |
| MM04T | TMEM87A   | transmembrane protein 87A                      | CCDS32205.1 | chr15_42531881-42531881_T_G   | 224Y>S | Substitution | Nonsynonymous coding | 11% |
| MM04T | TMPRSS11A | transmembrane protease, serine 11A             | CCDS3519.1  | chr4_68784711-68784711_A_C    | 314F>C | Substitution | Nonsynonymous coding | 20% |
| MM04T | TMPRSS11A | transmembrane protease, serine 11A             | CCDS3519.1  | chr4_68784857-68784857_C_A    | 265E>D | Substitution | Nonsynonymous coding | 35% |
| MM04T | TMPRSS11D | transmembrane protease, serine 11D             | CCDS3518.1  | chr4_68693020-68693020_G_T    | 304S>Y | Substitution | Nonsynonymous coding | 35% |
| MM04T | TMPRSS11E | transmembrane protease, serine 11E             | CCDS33993.1 | chr4_69342129-69342129_T_C    | 227L>P | Substitution | Nonsynonymous coding | 17% |
| MM04T | TMPRSS12  | transmembrane (C-terminal) protease, serine 12 | CCDS44881.1 | chr12_51237824-51237824_C_T   | NA     | Substitution | Splice site donor    | 29% |
| MM04T | TMPRSS15  | transmembrane protease, serine 15              | CCDS13571.1 | chr21_19725360-19725360_T_G   | 344K>T | Substitution | Nonsynonymous coding | 58% |
| MM04T | TMPRSS15  | transmembrane protease, serine 15              | CCDS13571.1 | chr21_19726177-19726177_G_T   | 295S>Y | Substitution | Nonsynonymous coding | 29% |

|       |           |                                                                        |                 |                               |         |              |                      |     |
|-------|-----------|------------------------------------------------------------------------|-----------------|-------------------------------|---------|--------------|----------------------|-----|
| MM04T | TMRSS7    | transmembrane protease, serine 7                                       | CCDS43129.2     | chr3_111795940-111795940_C_T  | 599R>C  | Substitution | Nonsynonymous coding | 28% |
| MM04T | TMSB4X    | thymosin beta 4, X-linked                                              | CCDS35202.1     | chrX_12994399-12994399_A_G    | 7M>V    | Substitution | Nonsynonymous coding | 22% |
| MM04T | TMTC1     | transmembrane and tetratricopeptide repeat containing 1                | CCDS8718.1      | chr12_29911671-29911671_G_T   | 66L>M   | Substitution | Nonsynonymous coding | 23% |
| MM04T | TMTC3     | transmembrane and tetratricopeptide repeat containing 3                | CCDS9032.1      | chr12_88547174-88547174_T_G   | 99F>C   | Substitution | Nonsynonymous coding | 29% |
| MM04T | TNFAIP2   | tumor necrosis factor, alpha-induced protein 2                         | CCDS9979.1      | chr14_103593952-103593952_G_T | 282Q>H  | Substitution | Nonsynonymous coding | 14% |
| MM04T | TNFRSF11A | tumor necrosis factor receptor superfamily, member 11a, NFKB activator | CCDS11980.1     | chr18_60036114-60036114_G_A   | 322E>K  | Substitution | Nonsynonymous coding | 30% |
| MM04T | TNFRSF8   | tumor necrosis factor receptor superfamily, member 8                   | CCDS144.1       | chr1_12157271-12157271_C_T    | 89R>X   | Substitution | Nonsense             | 25% |
| MM04T | TNFSF11   | tumor necrosis factor (ligand) superfamily, member 11                  | CCDS9384.1      | chr13_43181035-43181035_A_C   | 312K>T  | Substitution | Nonsynonymous coding | 22% |
| MM04T | TNFSF4    | tumor necrosis factor (ligand) superfamily, member 4                   | CCDS1306.1      | chr1_173155702-173155702_C_A  | 169E>X  | Substitution | Nonsense             | 33% |
| MM04T | TNFSF8    | tumor necrosis factor (ligand) superfamily, member 8                   | CCDS6810.1      | chr9_117666452-117666452_G_T  | 155S>Y  | Substitution | Nonsynonymous coding | 38% |
| MM04T | TNIK      | TRAF2 and NCK interacting kinase                                       | CCDS46956.1     | chr3_170797434-170797434_C_A  | 1107K>N | Substitution | Nonsynonymous coding | 45% |
| MM04T | TNKS      | tankyrase, TRF1-interacting ankyrin-related ADP-ribose polymerase      | CCDS5974.1      | chr8_9564457-9564457_A_T      | 469K>I  | Substitution | Nonsynonymous coding | 30% |
| MM04T | TNKS      | tankyrase, TRF1-interacting ankyrin-related ADP-ribose polymerase      | CCDS5974.1      | chr8_9620680-9620680_C_A      | 1100H>N | Substitution | Nonsynonymous coding | 23% |
| MM04T | TNKS2     | tankyrase, TRF1-interacting ankyrin-related ADP-ribose polymerase 2    | CCDS7417.1      | chr10_93593641-93593641_C_A   | 436S>Y  | Substitution | Nonsynonymous coding | 25% |
| MM04T | TNMD      | tenomodulin                                                            | CCDS14469.1     | chrX_99854520-99854520_G_T    | 254E>X  | Substitution | Nonsense             | 41% |
| MM04T | TNNC1     | troponin C type 1 (slow)                                               | CCDS2857.1      | chr3_52485544-52485544_C_A    | NA      | Substitution | Splice site acceptor | 20% |
| MM04T | TNNI3K    | TNNI3 interacting kinase                                               | CCDS44161.1     | chr1_75009601-75009601_G_A    | 916D>N  | Substitution | Nonsynonymous coding | 35% |
| MM04T | TNR       | tenascin R                                                             | CCDS1318.1      | chr1_175334385-175334385_G_T  | 783S>Y  | Substitution | Nonsynonymous coding | 14% |
| MM04T | TNRC6B    | trinucleotide repeat containing 6B                                     | CCDS46713.1     | chr22_40696978-40696978_C_A   | 1192S>Y | Substitution | Nonsynonymous coding | 34% |
| MM04T | TNS1      | tensin 1                                                               | CCDS2407.1      | chr2_218682432-218682432_G_T  | 1437F>L | Substitution | Nonsynonymous coding | 21% |
| MM04T | TNS1      | tensin 1                                                               | CCDS2407.1      | chr2_218700826-218700826_C_T  | 914R>H  | Substitution | Nonsynonymous coding | 25% |
| MM04T | TNS3      | tensin 3                                                               | ENST00000450444 | chr7_47481640-47481640_G_T    | 69S>Y   | Substitution | Nonsynonymous coding | 17% |
| MM04T | TONSL     | tonsoku-like, DNA repair protein                                       | CCDS34968.2     | chr8_145660903-145660903_G_A  | 936R>X  | Substitution | Nonsense             | 37% |
| MM04T | TOP2B     | topoisomerase (DNA) II beta 180kDa                                     | CCDS46776.1     | chr3_25673982-25673982_T_G    | 402K>N  | Substitution | Nonsynonymous coding | 31% |
| MM04T | TOPAZ1    | testis and ovary specific PAZ domain containing 1                      | CCDS46809.1     | chr3_44285704-44285704_C_A    | 569S>Y  | Substitution | Nonsynonymous coding | 10% |
| MM04T | TOPBP1    | topoisomerase (DNA) II binding protein 1                               | CCDS46919.1     | chr3_133372224-133372224_G_T  | 296S>Y  | Substitution | Nonsynonymous coding | 24% |
| MM04T | TP53      | tumor protein p53                                                      | CCDS11118.1     | chr17_7578182-7578182_G_A     | 223P>S  | Substitution | Nonsynonymous coding | 42% |
| MM04T | TP53BP1   | tumor protein p53 binding protein 1                                    | CCDS45250.1     | chr15_43748187-43748187_T_G   | 873K>N  | Substitution | Nonsynonymous coding | 26% |
| MM04T | TP53BP2   | tumor protein p53 binding protein, 2                                   | CCDS44319.1     | chr1_223985988-223985988_C_T  | 626G>E  | Substitution | Nonsynonymous coding | 22% |
| MM04T | TPCN2     | two pore segment channel 2                                             | CCDS8189.1      | chr11_68853209-68853209_G_A   | 637D>N  | Substitution | Nonsynonymous coding | 27% |
| MM04T | TPD52L3   | tumor protein D52-like 3                                               | CCDS34986.1     | chr9_6328778-6328778_G_T      | 61K>N   | Substitution | Nonsynonymous coding | 23% |
| MM04T | TPO       | thyroid peroxidase                                                     | CCDS1643.1      | chr2_1459947-1459947_G_A      | 238D>N  | Substitution | Nonsynonymous coding | 27% |



|       |          |                                                          |                 |                               |         |              |                      |     |
|-------|----------|----------------------------------------------------------|-----------------|-------------------------------|---------|--------------|----------------------|-----|
| MM04T | TPP1     | tripeptidyl peptidase I                                  | CCDS7770.1      | chr11_6638228-6638228_T_G     | 222N>T  | Substitution | Nonsynonymous coding | 36% |
| MM04T | TPP2     | tripeptidyl peptidase II                                 | CCDS9502.1      | chr13_103266499-103266499_A_C | 115K>Q  | Substitution | Nonsynonymous coding | 33% |
| MM04T | TPPP2    | tubulin polymerization-promoting protein family member 2 | CCDS9566.1      | chr14_21498830-21498830_C_A   | 30F>L   | Substitution | Nonsynonymous coding | 21% |
| MM04T | TPPP2    | tubulin polymerization-promoting protein family member 2 | CCDS9566.1      | chr14_21499256-21499256_C_A   | 87P>T   | Substitution | Nonsynonymous coding | 22% |
| MM04T | TPTE     | transmembrane phosphatase with tensin homology           | CCDS13560.2     | chr21_10910388-10910388_G_T   | 456N>K  | Substitution | Nonsynonymous coding | 17% |
| MM04T | TPX2     | TPX2, microtubule-associated, homolog (Xenopus laevis)   | CCDS13190.1     | chr20_30366672-30366672_G_T   | 313K>N  | Substitution | Nonsynonymous coding | 28% |
| MM04T | TPX2     | TPX2, microtubule-associated, homolog (Xenopus laevis)   | CCDS13190.1     | chr20_30381800-30381800_G_T   | 553K>N  | Substitution | Nonsynonymous coding | 30% |
| MM04T | TPX2     | TPX2, microtubule-associated, homolog (Xenopus laevis)   | CCDS13190.1     | chr20_30382201-30382201_T_C   | NA      | Substitution | Splice site acceptor | 21% |
| MM04T | TRAC     | T cell receptor alpha constant                           | ENST00000454915 | chr14_22539456-22539456_T_G   | 106F>V  | Substitution | Nonsynonymous coding | 34% |
| MM04T | TRAFD1   | TRAF-type zinc finger domain containing 1                | CCDS9160.1      | chr12_112589641-112589641_A_C | 439Q>P  | Substitution | Nonsynonymous coding | 28% |
| MM04T | TRAIP    | TRAF interacting protein                                 | CCDS2806.1      | chr3_49869449-49869449_C_A    | 313D>Y  | Substitution | Nonsynonymous coding | 23% |
| MM04T | TRAM1    | translocation associated membrane protein 1              | CCDS6207.1      | chr8_71499188-71499188_C_A    | 230E>X  | Substitution | Nonsense             | 30% |
| MM04T | TRANK1   | tetratricopeptide repeat and ankyrin repeat containing 1 | CCDS46789.1     | chr3_36872731-36872731_C_A    | 2187E>D | Substitution | Nonsynonymous coding | 35% |
| MM04T | TRANK1   | tetratricopeptide repeat and ankyrin repeat containing 1 | CCDS46789.1     | chr3_36873463-36873463_C_A    | 1943E>D | Substitution | Nonsynonymous coding | 22% |
| MM04T | TRANK1   | tetratricopeptide repeat and ankyrin repeat containing 1 | CCDS46789.1     | chr3_36887775-36887775_C_T    | 1125D>N | Substitution | Nonsynonymous coding | 32% |
| MM04T | TRANK1   | tetratricopeptide repeat and ankyrin repeat containing 1 | NM_014831       | chr3_36915727-36915727_C_T    | 279R>Q  | Substitution | Nonsynonymous coding | 28% |
| MM04T | TRAPPC11 | trafficking protein particle complex 11                  | CCDS34112.1     | chr4_184598642-184598642_G_A  | 256E>K  | Substitution | Nonsynonymous coding | 27% |
| MM04T | TRAPPC8  | trafficking protein particle complex 8                   | CCDS11901.1     | chr18_29493468-29493468_T_C   | 212E>G  | Substitution | Nonsynonymous coding | 29% |
| MM04T | TRBV27   | T cell receptor beta variable 27                         | ENST00000390399 | chr7_142423246-142423246_C_A  | 11L>I   | Substitution | Nonsynonymous coding | 25% |
| MM04T | TRBV29-1 | T cell receptor beta variable 29-1                       | ENST00000422143 | chr7_142448725-142448725_C_T  | 107L>F  | Substitution | Nonsynonymous coding | 35% |
| MM04T | TRBV30   | T cell receptor beta variable 30 (gene/pseudogene)       | ENST00000417977 | chr7_142510553-142510553_G_T  | 18S>Y   | Substitution | Nonsynonymous coding | 34% |
| MM04T | TRDN     | triadin                                                  | NM_006073       | chr6_123759249-123759249__T   | NA      | Insertion    | Frameshift           | 37% |
| MM04T | TREML4   | triggering receptor expressed on myeloid cells-like 4    | CCDS34446.1     | chr6_41197799-41197799_G_T    | NA      | Substitution | Splice site acceptor | 16% |
| MM04T | TRHDE    | thyrotropin-releasing hormone degrading enzyme           | CCDS9004.1      | chr12_73012702-73012702_G_A   | 740E>K  | Substitution | Nonsynonymous coding | 33% |
| MM04T | TRHDE    | thyrotropin-releasing hormone degrading enzyme           | CCDS9004.1      | chr12_73046918-73046918_G_T   | 944W>L  | Substitution | Nonsynonymous coding | 31% |
| MM04T | TRIB3    | tribbles homolog 3 (Drosophila)                          | CCDS12997.1     | chr20_368826-368826_C_T       | 58R>C   | Substitution | Nonsynonymous coding | 33% |
| MM04T | TRIM14   | tripartite motif containing 14                           | CCDS6734.1      | chr9_100850257-100850257_G_A  | 275T>M  | Substitution | Nonsynonymous coding | 11% |
| MM04T | TRIM14   | tripartite motif containing 14                           | CCDS6734.1      | chr9_100872180-100872180_C_A  | 98E>D   | Substitution | Nonsynonymous coding | 34% |
| MM04T | TRIM17   | tripartite motif containing 17                           | CCDS1571.1      | chr1_228602453-228602453_C_A  | 107K>N  | Substitution | Nonsynonymous coding | 11% |
| MM04T | TRIM22   | tripartite motif containing 22                           | CCDS41612.1     | chr11_5730331-5730331_C_A     | 317S>Y  | Substitution | Nonsynonymous coding | 33% |
| MM04T | TRIM22   | tripartite motif containing 22                           | CCDS41612.1     | chr11_5730723-5730723_G_T     | 448D>Y  | Substitution | Nonsynonymous coding | 21% |
| MM04T | TRIM23   | tripartite motif containing 23                           | CCDS3987.1      | chr5_64905082-64905082_C_A    | 344K>N  | Substitution | Nonsynonymous coding | 35% |

|       |          |                                                                    |                 |                              |         |              |                      |     |
|-------|----------|--------------------------------------------------------------------|-----------------|------------------------------|---------|--------------|----------------------|-----|
| MM04T | TRIM3    | tripartite motif containing 3                                      | CCDS7764.1      | chr11_6470404-6470404_C_T    | 697D>N  | Substitution | Nonsynonymous coding | 30% |
| MM04T | TRIM36   | tripartite motif containing 36                                     | CCDS4115.1      | chr5_114499263-114499263_G_A | 84R>W   | Substitution | Nonsynonymous coding | 38% |
| MM04T | TRIM36   | tripartite motif containing 36                                     | CCDS34211.1     | chr5_114506903-114506903_C_T | 27R>Q   | Substitution | Nonsynonymous coding | 37% |
| MM04T | TRIM5    | tripartite motif containing 5                                      | CCDS31393.1     | chr11_5699637-5699637_C_T    | 181V>I  | Substitution | Nonsynonymous coding | 26% |
| MM04T | TRIM56   | tripartite motif containing 56                                     | CCDS43625.1     | chr7_100732682-100732682_C_T | 697R>X  | Substitution | Nonsense             | 35% |
| MM04T | TRIM59   | tripartite motif containing 59                                     | CCDS3190.1      | chr3_160156780-160156780_T_G | 64E>D   | Substitution | Nonsynonymous coding | 30% |
| MM04T | TRIM6    | tripartite motif containing 6                                      | CCDS31388.1     | chr11_5631371-5631371_C_A    | NA      | Substitution | Splice site acceptor | 28% |
| MM04T | TRIML2   | tripartite motif family-like 2                                     | CCDS3850.1      | chr4_189026051-189026051_C_A | 25E>D   | Substitution | Nonsynonymous coding | 26% |
| MM04T | TRIO     | trio Rho guanine nucleotide exchange factor                        | CCDS3883.1      | chr5_14297367-14297367_G_A   | 455E>K  | Substitution | Nonsynonymous coding | 37% |
| MM04T | TRIP10   | thyroid hormone receptor interactor 10                             | CCDS12172.1     | chr19_6743760-6743760_A_C    | 185E>D  | Substitution | Nonsynonymous coding | 32% |
| MM04T | TRIP12   | thyroid hormone receptor interactor 12                             | CCDS33391.1     | chr2_230633371-230633371_G_T | 1915L>I | Substitution | Nonsynonymous coding | 29% |
| MM04T | TRIP12   | thyroid hormone receptor interactor 12                             | CCDS33391.1     | chr2_230654457-230654457_G_T | 1447S>X | Substitution | Nonsense             | 20% |
| MM04T | TRIP4    | thyroid hormone receptor interactor 4                              | CCDS10194.1     | chr15_64686239-64686239_G_T  | 66E>X   | Substitution | Nonsense             | 30% |
| MM04T | TRMT10A  | tRNA methyltransferase 10 homolog A (S. cerevisiae)                | CCDS3650.1      | chr4_100479277-100479277_G_A | 93R>X   | Substitution | Nonsense             | 33% |
| MM04T | TRMT5    | tRNA methyltransferase 5 homolog (S. cerevisiae)                   | CCDS32092.1     | chr14_61446449-61446449_C_T  | 56R>K   | Substitution | Nonsynonymous coding | 33% |
| MM04T | TRNAU1AP | tRNA selenocysteine 1 associated protein 1                         | CCDS324.1       | chr1_28887170-28887170_G_T   | 51E>X   | Substitution | Nonsense             | 22% |
| MM04T | TRO      | trophinin                                                          | CCDS43959.1     | chrX_54955714-54955714_C_T   | 853L>F  | Substitution | Nonsynonymous coding | 31% |
| MM04T | TROAP    | trophinin associated protein                                       | CCDS8784.1      | chr12_49722962-49722962_C_T  | 347R>W  | Substitution | Nonsynonymous coding | 19% |
| MM04T | TROVE2   | TROVE domain family, member 2                                      | CCDS1379.1      | chr1_193053835-193053835_C_T | 531R>X  | Substitution | Nonsense             | 25% |
| MM04T | TRPA1    | transient receptor potential cation channel, subfamily A, member 1 | CCDS34908.1     | chr8_72966005-72966005_G_A   | 543R>C  | Substitution | Nonsynonymous coding | 41% |
| MM04T | TRPC4    | transient receptor potential cation channel, subfamily C, member 4 | CCDS45037.1     | chr13_38225565-38225565_C_T  | 639R>Q  | Substitution | Nonsynonymous coding | 29% |
| MM04T | TRPC5    | transient receptor potential cation channel, subfamily C, member 5 | CCDS14561.1     | chrX_111019934-111019934_C_A | 843K>N  | Substitution | Nonsynonymous coding | 33% |
| MM04T | TRPC5    | transient receptor potential cation channel, subfamily C, member 5 | CCDS14561.1     | chrX_111095658-111095658_A_C | 415I>M  | Substitution | Nonsynonymous coding | 24% |
| MM04T | TRPC7    | transient receptor potential cation channel, subfamily C, member 7 | NM_020389       | chr5_135567128-135567128_G_A | 652L>F  | Substitution | Nonsynonymous coding | 32% |
| MM04T | TRPC7    | transient receptor potential cation channel, subfamily C, member 7 | NM_020389       | chr5_135610523-135610523_G_T | 322F>L  | Substitution | Nonsynonymous coding | 19% |
| MM04T | TRPM1    | transient receptor potential cation channel, subfamily M, member 1 | CCDS10024.2     | chr15_31319298-31319298_A_C  | 1084S>A | Substitution | Nonsynonymous coding | 21% |
| MM04T | TRPM1    | transient receptor potential cation channel, subfamily M, member 1 | CCDS10024.2     | chr15_31295173-31295173_C_A  | 1222E>X | Substitution | Nonsense             | 22% |
| MM04T | TRPM3    | transient receptor potential cation channel, subfamily M, member 3 | CCDS43835.1     | chr9_73152136-73152136_G_A   | 1286S>L | Substitution | Nonsynonymous coding | 29% |
| MM04T | TRPM3    | transient receptor potential cation channel, subfamily M, member 3 | CCDS43835.1     | chr9_73235035-73235035_C_T   | 684D>N  | Substitution | Nonsynonymous coding | 44% |
| MM04T | TRPM3    | transient receptor potential cation channel, subfamily M, member 3 | ENST00000377101 | chr9_73376427-73376427_G_T   | 301F>L  | Substitution | Nonsynonymous coding | 31% |
| MM04T | TRPM3    | transient receptor potential cation channel, subfamily M, member 3 | CCDS43835.1     | chr9_73736193-73736193_C_A   | 26L>F   | Substitution | Nonsynonymous coding | 35% |
| MM04T | TRPM3    | transient receptor potential cation channel, subfamily M, member 3 | CCDS43835.1     | chr9_73399028-73399028_C_A   | 381E>X  | Substitution | Nonsense             | 28% |

|       |          |                                                                    |              |                               |         |              |                      |     |
|-------|----------|--------------------------------------------------------------------|--------------|-------------------------------|---------|--------------|----------------------|-----|
| MM04T | TRPM4    | transient receptor potential cation channel, subfamily M, member 4 | CCDS33073.1  | chr19_49714028-49714028_G_T   | 1130E>D | Substitution | Nonsynonymous coding | 21% |
| MM04T | TRPM6    | transient receptor potential cation channel, subfamily M, member 6 | CCDS6647.1   | chr9_77339653-77339653_C_A    | 1982R>I | Substitution | Nonsynonymous coding | 35% |
| MM04T | TRPM6    | transient receptor potential cation channel, subfamily M, member 6 | CCDS6647.1   | chr9_77400924-77400924_A_G    | 929W>R  | Substitution | Nonsynonymous coding | 27% |
| MM04T | TRPM6    | transient receptor potential cation channel, subfamily M, member 6 | CCDS6647.1   | chr9_77400980-77400980_C_A    | 910W>L  | Substitution | Nonsynonymous coding | 22% |
| MM04T | TRPM6    | transient receptor potential cation channel, subfamily M, member 6 | CCDS6647.1   | chr9_77411760-77411760_T_G    | 763K>T  | Substitution | Nonsynonymous coding | 29% |
| MM04T | TRPS1    | trichorhinophalangeal syndrome I                                   | CCDS6318.2   | chr8_116631590-116631590_G_C  | 245Y>X  | Substitution | Nonsense             | 32% |
| MM04T | TRPV4    | transient receptor potential cation channel, subfamily V, member 4 | CCDS9134.1   | chr12_110231365-110231365_G_A | 542S>F  | Substitution | Nonsynonymous coding | 28% |
| MM04T | TRPV4    | transient receptor potential cation channel, subfamily V, member 4 | CCDS9134.1   | chr12_110236550-110236550_A_G | 341F>L  | Substitution | Nonsynonymous coding | 21% |
| MM04T | TRPV4    | transient receptor potential cation channel, subfamily V, member 4 | CCDS9134.1   | chr12_110252352-110252352_C_T | 84D>N   | Substitution | Nonsynonymous coding | 35% |
| MM04T | TRPV5    | transient receptor potential cation channel, subfamily V, member 5 | CCDS5875.1   | chr7_142605914-142605914_C_A  | 652K>N  | Substitution | Nonsynonymous coding | 36% |
| MM04T | TSC1     | tuberous sclerosis 1                                               | CCDS6956.1   | chr9_135781467-135781467_G_A  | 500R>X  | Substitution | Nonsense             | 29% |
| MM04T | TSC1     | tuberous sclerosis 1                                               | CCDS6956.1   | chr9_135782124-135782124_C_A  | 478E>X  | Substitution | Nonsense             | 23% |
| MM04T | TSC2     | tuberous sclerosis 2                                               | CCDS10458.1  | chr16_2134305-2134305_G_A     | 1361R>Q | Substitution | Nonsynonymous coding | 20% |
| MM04T | TSC22D4  | TSC22 domain family, member 4                                      | CCDS5695.1   | chr7_100075102-100075102_G_A  | 187S>L  | Substitution | Nonsynonymous coding | 41% |
| MM04T | TSEN34   | tRNA splicing endonuclease 34 homolog (S. cerevisiae)              | CCDS42609.1  | chr19_54695638-54695638_G_A   | 104A>T  | Substitution | Nonsynonymous coding | 25% |
| MM04T | TSEN34   | tRNA splicing endonuclease 34 homolog (S. cerevisiae)              | CCDS42609.1  | chr19_54696138-54696138_G_A   | 220R>H  | Substitution | Nonsynonymous coding | 34% |
| MM04T | TSG101   | tumor susceptibility gene 101                                      | CCDS7842.1   | chr11_18505518-18505518_G_A   | 248R>C  | Substitution | Nonsynonymous coding | 21% |
| MM04T | TSGA10   | testis specific, 10                                                | CCDS2037.1   | chr2_99722030-99722030_C_A    | 114R>I  | Substitution | Nonsynonymous coding | 31% |
| MM04T | TSGA10IP | testis specific, 10 interacting protein                            | NM_152762    | chr11_65715262-65715262_G_T   | 322E>D  | Substitution | Nonsynonymous coding | 18% |
| MM04T | TSGA13   | testis specific, 13                                                | CCDS5824.1   | chr7_130357652-130357652_T    | NA      | Insertion    | Frameshift           | 32% |
| MM04T | TSHZ3    | teashirt zinc finger homeobox 3                                    | CCDS12421.2  | chr19_31770413-31770413_C_T   | 96E>K   | Substitution | Nonsynonymous coding | 30% |
| MM04T | TSPAN19  | tetraspanin 19                                                     | CCDS44949.1  | chr12_85423524-85423524_C_A   | 38D>Y   | Substitution | Nonsynonymous coding | 36% |
| MM04T | TSPAN32  | tetraspanin 32                                                     | CCDS7733.1   | chr11_2324141-2324141_G_A     | 45R>H   | Substitution | Nonsynonymous coding | 16% |
| MM04T | TSPAN8   | tetraspanin 8                                                      | CCDS8999.1   | chr12_71537954-71537954_G_A   | 34R>X   | Substitution | Nonsense             | 19% |
| MM04T | TSPYL5   | TSPY-like 5                                                        | CCDS34927.1  | chr8_98289523-98289523_C_T    | 184E>K  | Substitution | Nonsynonymous coding | 30% |
| MM04T | TSPYL6   | TSPY-like 6                                                        | NM_001003937 | chr2_54482390-54482390_C_A    | 300R>I  | Substitution | Nonsynonymous coding | 27% |
| MM04T | TTBK2    | tau tubulin kinase 2                                               | CCDS42029.1  | chr15_43103902-43103902_C_A   | 227R>I  | Substitution | Nonsynonymous coding | 23% |
| MM04T | TTC14    | tetratricopeptide repeat domain 14                                 | CCDS3237.1   | chr3_180326556-180326556_C_A  | 453T>K  | Substitution | Nonsynonymous coding | 36% |
| MM04T | TTC16    | tetratricopeptide repeat domain 16                                 | CCDS6875.1   | chr9_130479634-130479634_C_A  | 71C>X   | Substitution | Nonsense             | 26% |
| MM04T | TTC21B   | tetratricopeptide repeat domain 21B                                | CCDS33315.1  | chr2_166758275-166758275_T_G  | 905K>T  | Substitution | Nonsynonymous coding | 29% |
| MM04T | TTC30A   | tetratricopeptide repeat domain 30A                                | CCDS2276.1   | chr2_178481692-178481692_T_C  | 580T>A  | Substitution | Nonsynonymous coding | 35% |
| MM04T | TTC30B   | tetratricopeptide repeat domain 30B                                | CCDS42784.1  | chr2_178416302-178416302_A_G  | 397V>A  | Substitution | Nonsynonymous coding | 28% |

|       |        |                                                    |                 |                              |          |              |                      |     |
|-------|--------|----------------------------------------------------|-----------------|------------------------------|----------|--------------|----------------------|-----|
| MM04T | TTC30B | tetratricopeptide repeat domain 30B                | CCDS42784.1     | chr2_178416698-178416698_C_A | 265R>I   | Substitution | Nonsynonymous coding | 22% |
| MM04T | TTC34  | tetratricopeptide repeat domain 34                 | ENST00000401095 | chr1_2700243-2700243_C_T     | 200D>N   | Substitution | Nonsynonymous coding | 18% |
| MM04T | TTC34  | tetratricopeptide repeat domain 34                 | ENST00000401095 | chr1_2700297-2700297_G_T     | 182L>I   | Substitution | Nonsynonymous coding | 20% |
| MM04T | TTC38  | tetratricopeptide repeat domain 38                 | CCDS43030.1     | chr22_46671259-46671259_G_T  | 160Q>H   | Substitution | Nonsynonymous coding | 31% |
| MM04T | TTC39A | tetratricopeptide repeat domain 39A                | CCDS44143.1     | chr1_51753908-51753908_C_T   | 556R>Q   | Substitution | Nonsynonymous coding | 38% |
| MM04T | TTC39A | tetratricopeptide repeat domain 39A                | CCDS44143.1     | chr1_51756207-51756207_C_A   | 457E>X   | Substitution | Nonsense             | 33% |
| MM04T | TTC6   | tetratricopeptide repeat domain 6                  | ENST00000382320 | chr14_38266134-38266134_G_T  | 51M>I    | Substitution | Nonsynonymous coding | 22% |
| MM04T | TTF1   | transcription termination factor, RNA polymerase I | CCDS6948.1      | chr9_135277775-135277775_A_C | 145F>C   | Substitution | Nonsynonymous coding | 36% |
| MM04T | TTF1   | transcription termination factor, RNA polymerase I | CCDS6948.1      | chr9_135278196-135278196_A_C | 5S>A     | Substitution | Nonsynonymous coding | 22% |
| MM04T | TTL    | tubulin tyrosine ligase                            | CCDS2096.1      | chr2_113260572-113260572_T_C | 230V>A   | Substitution | Nonsynonymous coding | 23% |
| MM04T | TLL11  | tubulin tyrosine ligase-like family, member 11     | CCDS48012.1     | chr9_124801608-124801608_G_A | 258H>Y   | Substitution | Nonsynonymous coding | 22% |
| MM04T | TLL2   | tubulin tyrosine ligase-like family, member 2      | CCDS5301.1      | chr6_167754076-167754076_G_T | 230D>Y   | Substitution | Nonsynonymous coding | 15% |
| MM04T | TLL5   | tubulin tyrosine ligase-like family, member 5      | CCDS32124.1     | chr14_76243122-76243122_G_T  | 772K>N   | Substitution | Nonsynonymous coding | 18% |
| MM04T | TLL7   | tubulin tyrosine ligase-like family, member 7      | CCDS690.2       | chr1_84356079-84356079_C_T   | 765R>Q   | Substitution | Nonsynonymous coding | 23% |
| MM04T | TTN    | titin                                              | NM_133379       | chr2_179614443-179614443_T   | NA       | Insertion    | Frameshift           | 23% |
| MM04T | TTN    | titin                                              | ENST00000356127 | chr2_179402490-179402490_T_G | 30578K>N | Substitution | Nonsynonymous coding | 40% |
| MM04T | TTN    | titin                                              | ENST00000356127 | chr2_179414931-179414931_C_A | 27975R>I | Substitution | Nonsynonymous coding | 27% |
| MM04T | TTN    | titin                                              | ENST00000356127 | chr2_179427758-179427758_C_A | 25131G>C | Substitution | Nonsynonymous coding | 24% |
| MM04T | TTN    | titin                                              | ENST00000356127 | chr2_179436214-179436214_C_A | 22312R>I | Substitution | Nonsynonymous coding | 26% |
| MM04T | TTN    | titin                                              | ENST00000356127 | chr2_179436760-179436760_G_T | 22130P>H | Substitution | Nonsynonymous coding | 26% |
| MM04T | TTN    | titin                                              | ENST00000356127 | chr2_179457152-179457152_C_A | 17290E>D | Substitution | Nonsynonymous coding | 26% |
| MM04T | TTN    | titin                                              | ENST00000356127 | chr2_179473500-179473500_T_G | 14845K>T | Substitution | Nonsynonymous coding | 50% |
| MM04T | TTN    | titin                                              | ENST00000356127 | chr2_179474899-179474899_G_T | 14550F>L | Substitution | Nonsynonymous coding | 22% |
| MM04T | TTN    | titin                                              | ENST00000356127 | chr2_179495762-179495762_C_A | 12103E>D | Substitution | Nonsynonymous coding | 23% |
| MM04T | TTN    | titin                                              | ENST00000356127 | chr2_179498238-179498238_C_T | 11715R>H | Substitution | Nonsynonymous coding | 26% |
| MM04T | TTN    | titin                                              | ENST00000356127 | chr2_179500275-179500275_C_A | 11358D>Y | Substitution | Nonsynonymous coding | 21% |
| MM04T | TTN    | titin                                              | ENST00000356127 | chr2_179558686-179558686_G_T | 9248F>L  | Substitution | Nonsynonymous coding | 24% |
| MM04T | TTN    | titin                                              | ENST00000356127 | chr2_179584926-179584926_G_A | 6571R>W  | Substitution | Nonsynonymous coding | 28% |
| MM04T | TTN    | titin                                              | ENST00000356127 | chr2_179587827-179587827_C_T | 6059E>K  | Substitution | Nonsynonymous coding | 32% |
| MM04T | TTN    | titin                                              | ENST00000356127 | chr2_179593664-179593664_C_A | 5123K>N  | Substitution | Nonsynonymous coding | 36% |
| MM04T | TTN    | titin                                              | ENST00000356127 | chr2_179603052-179603052_C_T | 3466E>K  | Substitution | Nonsynonymous coding | 37% |
| MM04T | TTN    | titin                                              | ENST00000342175 | chr2_179603970-179603970_C_T | 4493D>N  | Substitution | Nonsynonymous coding | 30% |

|       |         |                                                                |                 |                               |          |              |                      |     |
|-------|---------|----------------------------------------------------------------|-----------------|-------------------------------|----------|--------------|----------------------|-----|
| MM04T | TTN     | titin                                                          | ENST00000342175 | chr2_179606495-179606495_A_C  | 3651F>C  | Substitution | Nonsynonymous coding | 10% |
| MM04T | TTN     | titin                                                          | NM_133379       | chr2_179610805-179610805_C_T  | 5441R>Q  | Substitution | Nonsynonymous coding | 38% |
| MM04T | TTN     | titin                                                          | NM_133379       | chr2_179612897-179612897_C_T  | 4744E>K  | Substitution | Nonsynonymous coding | 32% |
| MM04T | TTN     | titin                                                          | NM_133379       | chr2_179613073-179613073_C_A  | 4685R>I  | Substitution | Nonsynonymous coding | 23% |
| MM04T | TTN     | titin                                                          | NM_133379       | chr2_179613394-179613394_T_G  | 4578Q>P  | Substitution | Nonsynonymous coding | 27% |
| MM04T | TTN     | titin                                                          | NM_133379       | chr2_179638266-179638266_C_T  | 2506R>Q  | Substitution | Nonsynonymous coding | 39% |
| MM04T | TTN     | titin                                                          | NM_133379       | chr2_179639138-179639138_C_T  | 2285E>K  | Substitution | Nonsynonymous coding | 24% |
| MM04T | TTN     | titin                                                          | NM_133379       | chr2_179641543-179641543_C_T  | 1683R>Q  | Substitution | Nonsynonymous coding | 35% |
| MM04T | TTN     | titin                                                          | ENST00000356127 | chr2_179476482-179476482_T_G  | NA       | Substitution | Splice site donor    | 39% |
| MM04T | TTN     | titin                                                          | ENST00000356127 | chr2_179416861-179416861_C_A  | 27686E>X | Substitution | Nonsense             | 34% |
| MM04T | TTN     | titin                                                          | ENST00000356127 | chr2_179432768-179432768_C_A  | 23461E>X | Substitution | Nonsense             | 17% |
| MM04T | TTN     | titin                                                          | ENST00000356127 | chr2_179579178-179579178_C_A  | 7531E>X  | Substitution | Nonsense             | 24% |
| MM04T | TTN     | titin                                                          | NM_133379       | chr2_179613626-179613626_C_A  | 4501E>X  | Substitution | Nonsense             | 18% |
| MM04T | TTN     | titin                                                          | NM_133379       | chr2_179615321-179615321_G_A  | 3936R>X  | Substitution | Nonsense             | 21% |
| MM04T | TTPA    | tocopherol (alpha) transfer protein                            | CCDS6178.1      | chr8_63985509-63985509_G_T    | 115L>I   | Substitution | Nonsynonymous coding | 27% |
| MM04T | TTYH2   | tweety homolog 2 (Drosophila)                                  | CCDS32717.1     | chr17_72249971-72249971_C_T   | 508T>M   | Substitution | Nonsynonymous coding | 15% |
| MM04T | TUBAL3  | tubulin, alpha-like 3                                          | CCDS7066.2      | chr10_5442918-5442918_T_G     | 46N>H    | Substitution | Nonsynonymous coding | 27% |
| MM04T | TUBAL3  | tubulin, alpha-like 3                                          | CCDS7066.2      | chr10_5435503-5435503_C_A     | 440E>X   | Substitution | Nonsense             | 21% |
| MM04T | TUBGCP2 | tubulin, gamma complex associated protein 2                    | CCDS7676.1      | chr10_135106730-135106730_C_A | 279E>D   | Substitution | Nonsynonymous coding | 30% |
| MM04T | TUBGCP5 | tubulin, gamma complex associated protein 5                    | CCDS10008.1     | chr15_22867481-22867481_C_A   | 853P>T   | Substitution | Nonsynonymous coding | 27% |
| MM04T | TUBGCP6 | tubulin, gamma complex associated protein 6                    | CCDS14087.1     | chr22_50682689-50682689_C_T   | 67R>K    | Substitution | Nonsynonymous coding | 28% |
| MM04T | TUFM    | Tu translation elongation factor, mitochondrial                | CCDS10642.1     | chr16_28856770-28856770_C_A   | 93K>N    | Substitution | Nonsynonymous coding | 40% |
| MM04T | TUSC3   | tumor suppressor candidate 3                                   | CCDS5994.1      | chr8_15517143-15517143_G_T    | 185R>I   | Substitution | Nonsynonymous coding | 27% |
| MM04T | TUSC3   | tumor suppressor candidate 3                                   | CCDS5994.1      | chr8_15480694-15480694_C_T    | 82R>X    | Substitution | Nonsense             | 24% |
| MM04T | TXNRD1  | thioredoxin reductase 1                                        | ENST00000429002 | chr12_104742156-104742156_A_C | 640K>T   | Substitution | Nonsynonymous coding | 26% |
| MM04T | TXNRD3  | thioredoxin reductase 3                                        | ENST00000450785 | chr3_126341346-126341346_T_G  | 555K>T   | Substitution | Nonsynonymous coding | 28% |
| MM04T | TYMS    | thymidylate synthetase                                         | CCDS11821.1     | chr18_672903-672903_G_A       | 283R>Q   | Substitution | Nonsynonymous coding | 39% |
| MM04T | TYR     | tyrosinase                                                     | CCDS8284.1      | chr11_88911770-88911770_C_T   | 217R>W   | Substitution | Nonsynonymous coding | 19% |
| MM04T | TYW1B   | tRNA-yW synthesizing protein 1 homolog B (S. cerevisiae)       | ENST00000438904 | chr7_72286030-72286030_T_C    | 13T>A    | Substitution | Nonsynonymous coding | 15% |
| MM04T | U2AF1L4 | U2 small nuclear RNA auxiliary factor 1-like 4                 | CCDS42551.1     | chr19_36234923-36234923_A_G   | 119Y>H   | Substitution | Nonsynonymous coding | 21% |
| MM04T | U2SURP  | U2 snRNP-associated SURP domain containing                     | CCDS46928.1     | chr3_142761969-142761969_G_T  | 799E>X   | Substitution | Nonsense             | 45% |
| MM04T | UACA    | uveal autoantigen with coiled-coil domains and ankyrin repeats | CCDS10235.1     | chr15_70960151-70960151_C_A   | 958E>X   | Substitution | Nonsense             | 42% |

|       |         |                                                               |                 |                               |         |              |                      |     |
|-------|---------|---------------------------------------------------------------|-----------------|-------------------------------|---------|--------------|----------------------|-----|
| MM04T | UBAP2   | ubiquitin associated protein 2                                | CCDS6547.1      | chr9_33989092-33989092_C_A    | 107K>N  | Substitution | Nonsynonymous coding | 39% |
| MM04T | UBASH3A | ubiquitin associated and SH3 domain containing A              | CCDS13687.1     | chr21_43833289-43833289_G_A   | 171E>K  | Substitution | Nonsynonymous coding | 26% |
| MM04T | UBE2A   | ubiquitin-conjugating enzyme E2A                              | CCDS14580.1     | chrX_118717207-118717207_C_T  | 150R>C  | Substitution | Nonsynonymous coding | 43% |
| MM04T | UBE2D2  | ubiquitin-conjugating enzyme E2D 2                            | CCDS43369.1     | chr5_138994337-138994337_A_C  | 59D>A   | Substitution | Nonsynonymous coding | 29% |
| MM04T | UBE2E2  | ubiquitin-conjugating enzyme E2E 2                            | CCDS2637.1      | chr3_23541203-23541203_C_A    | 111S>X  | Substitution | Nonsense             | 27% |
| MM04T | UBE2O   | ubiquitin-conjugating enzyme E2O                              | CCDS32742.1     | chr17_74394407-74394407_T_C   | 652R>G  | Substitution | Nonsynonymous coding | 29% |
| MM04T | UBE2Q1  | ubiquitin-conjugating enzyme E2Q family member 1              | CCDS1069.1      | chr1_154527246-154527246_C_T  | 185V>M  | Substitution | Nonsynonymous coding | 28% |
| MM04T | UBE2U   | ubiquitin-conjugating enzyme E2U (putative)                   | CCDS627.1       | chr1_64698264-64698264_T_G    | 176F>C  | Substitution | Nonsynonymous coding | 33% |
| MM04T | UBE3A   | ubiquitin protein ligase E3A                                  | CCDS45192.1     | chr15_25616927-25616927_C_A   | 135E>X  | Substitution | Nonsense             | 29% |
| MM04T | UBE3B   | ubiquitin protein ligase E3B                                  | CCDS9129.1      | chr12_109928889-109928889_C_A | 224L>I  | Substitution | Nonsynonymous coding | 21% |
| MM04T | UBE3D   | ubiquitin protein ligase E3D                                  | CCDS34491.1     | chr6_83763906-83763906_A_C    | 109F>C  | Substitution | Nonsynonymous coding | 23% |
| MM04T | UBIAD1  | UbiA prenyltransferase domain containing 1                    | CCDS129.1       | chr1_11346073-11346073_G_A    | 301R>Q  | Substitution | Nonsynonymous coding | 38% |
| MM04T | UBQLN3  | ubiquilin 3                                                   | CCDS7758.1      | chr11_5529898-5529898_C_A     | 297E>D  | Substitution | Nonsynonymous coding | 22% |
| MM04T | UBQLNL  | ubiquilin-like                                                | CCDS31385.1     | chr11_5537652-5537652_C_T     | 7R>Q    | Substitution | Nonsynonymous coding | 28% |
| MM04T | UBR1    | ubiquitin protein ligase E3 component n-recognin 1            | CCDS10091.1     | chr15_43348619-43348619_C_A   | 402E>X  | Substitution | Nonsense             | 45% |
| MM04T | UBR3    | ubiquitin protein ligase E3 component n-recognin 3 (putative) | CCDS2238.2      | chr2_170885888-170885888_C_T  | 1496R>W | Substitution | Nonsynonymous coding | 36% |
| MM04T | UBR4    | ubiquitin protein ligase E3 component n-recognin 4            | CCDS189.1       | chr1_19493699-19493699_T_G    | 1309Q>P | Substitution | Nonsynonymous coding | 24% |
| MM04T | UBR5    | ubiquitin protein ligase E3 component n-recognin 5            | CCDS34933.1     | chr8_103305990-103305990_C_T  | 1478V>I | Substitution | Nonsynonymous coding | 28% |
| MM04T | UBR5    | ubiquitin protein ligase E3 component n-recognin 5            | CCDS34933.1     | chr8_103326139-103326139_G_A  | 634R>X  | Substitution | Nonsense             | 33% |
| MM04T | UBR7    | ubiquitin protein ligase E3 component n-recognin 7 (putative) | CCDS9909.1      | chr14_93693318-93693318_C_A   | 405F>L  | Substitution | Nonsynonymous coding | 25% |
| MM04T | UBTF    | upstream binding transcription factor, RNA polymerase I       | CCDS11480.1     | chr17_42290650-42290650_T_A   | 159M>L  | Substitution | Nonsynonymous coding | 21% |
| MM04T | UBXN2A  | UBX domain protein 2A                                         | CCDS1704.1      | chr2_24207608-24207608_C_A    | 164A>D  | Substitution | Nonsynonymous coding | 22% |
| MM04T | UBXN7   | UBX domain protein 7                                          | CCDS43191.1     | chr3_196083647-196083647_C_T  | 460R>Q  | Substitution | Nonsynonymous coding | 33% |
| MM04T | UBXN7   | UBX domain protein 7                                          | CCDS43191.1     | chr3_196118794-196118794_G_A  | 120R>W  | Substitution | Nonsynonymous coding | 33% |
| MM04T | UBXN7   | UBX domain protein 7                                          | CCDS43191.1     | chr3_196129863-196129863_T_G  | 83Q>H   | Substitution | Nonsynonymous coding | 26% |
| MM04T | UBXN7   | UBX domain protein 7                                          | CCDS43191.1     | chr3_196089444-196089444_C_A  | 317E>X  | Substitution | Nonsense             | 30% |
| MM04T | UBXN8   | UBX domain protein 8                                          | ENST00000265616 | chr8_30608999-30608999_C_T    | 59L>F   | Substitution | Nonsynonymous coding | 18% |
| MM04T | UCHL5   | ubiquitin carboxyl-terminal hydrolase L5                      | CCDS1378.1      | chr1_192992054-192992054_A_G  | NA      | Substitution | Splice site donor    | 38% |
| MM04T | UCN2    | urocortin 2                                                   | CCDS2772.1      | chr3_48600436-48600436_C_T    | 41R>Q   | Substitution | Nonsynonymous coding | 29% |
| MM04T | UFSP2   | UFM1-specific peptidase 2                                     | CCDS3842.1      | chr4_186339638-186339638_T_G  | 97K>T   | Substitution | Nonsynonymous coding | 40% |
| MM04T | UGDH    | UDP-glucose 6-dehydrogenase                                   | CCDS3455.1      | chr4_39515753-39515753_A      | NA      | Insertion    | Frameshift           | 24% |
| MM04T | UGDH    | UDP-glucose 6-dehydrogenase                                   | CCDS3455.1      | chr4_39511412-39511412_C_A    | 260R>I  | Substitution | Nonsynonymous coding | 40% |

|       |         |                                                                     |             |                              |         |              |                      |     |
|-------|---------|---------------------------------------------------------------------|-------------|------------------------------|---------|--------------|----------------------|-----|
| MM04T | UGGT1   | UDP-glucose glycoprotein glucosyltransferase 1                      | CCDS2154.1  | chr2_128865608-128865608_G_A | 125R>H  | Substitution | Nonsynonymous coding | 34% |
| MM04T | UGGT1   | UDP-glucose glycoprotein glucosyltransferase 1                      | CCDS2154.1  | chr2_128878857-128878857_T_G | 353F>C  | Substitution | Nonsynonymous coding | 10% |
| MM04T | UGGT2   | UDP-glucose glycoprotein glucosyltransferase 2                      | CCDS9480.1  | chr13_96513048-96513048_A_C  | 1245F>C | Substitution | Nonsynonymous coding | 30% |
| MM04T | UGT1A6  | UDP glucuronosyltransferase 1 family, polypeptide A6                | CCDS33402.1 | chr2_234526691-234526691_C_A | 113S>Y  | Substitution | Nonsynonymous coding | 21% |
| MM04T | UGT1A6  | UDP glucuronosyltransferase 1 family, polypeptide A6                | CCDS2507.1  | chr2_234601822-234601822_G_A | 58V>M   | Substitution | Nonsynonymous coding | 16% |
| MM04T | UGT2A1  | UDP glucuronosyltransferase 2 family, polypeptide A1, complex locus | CCDS3529.1  | chr4_70512737-70512737_C_A   | 209R>I  | Substitution | Nonsynonymous coding | 23% |
| MM04T | UGT2B15 | UDP glucuronosyltransferase 2 family, polypeptide B15               | CCDS3524.1  | chr4_69512834-69512834_C_A   | 527K>N  | Substitution | Nonsynonymous coding | 19% |
| MM04T | UHMK1   | U2AF homology motif (UHM) kinase 1                                  | CCDS1239.1  | chr1_162470849-162470849_C_A | 236F>L  | Substitution | Nonsynonymous coding | 26% |
| MM04T | ULK2    | unc-51-like kinase 2 (C. elegans)                                   | CCDS11213.1 | chr17_19713705-19713705_G_T  | 381F>L  | Substitution | Nonsynonymous coding | 26% |
| MM04T | ULK4    | unc-51-like kinase 4 (C. elegans)                                   | CCDS43071.1 | chr3_41973499-41973499_C_A   | NA      | Substitution | Splice site acceptor | 33% |
| MM04T | UMODL1  | uromodulin-like 1                                                   | CCDS42935.1 | chr21_43524033-43524033_G_T  | 452R>I  | Substitution | Nonsynonymous coding | 19% |
| MM04T | UNC13B  | unc-13 homolog B (C. elegans)                                       | CCDS6579.1  | chr9_35376184-35376184_G_A   | 510E>K  | Substitution | Nonsynonymous coding | 28% |
| MM04T | UNC13C  | unc-13 homolog C (C. elegans)                                       | CCDS45264.1 | chr15_54308000-54308000_G_T  | 967R>I  | Substitution | Nonsynonymous coding | 32% |
| MM04T | UNC13C  | unc-13 homolog C (C. elegans)                                       | CCDS45264.1 | chr15_54527286-54527286_T_G  | 1044L>V | Substitution | Nonsynonymous coding | 32% |
| MM04T | UNC13C  | unc-13 homolog C (C. elegans)                                       | CCDS45264.1 | chr15_54860065-54860065_C_A  | 2009S>Y | Substitution | Nonsynonymous coding | 17% |
| MM04T | UNC13C  | unc-13 homolog C (C. elegans)                                       | CCDS45264.1 | chr15_54305200-54305200_G_T  | 34E>X   | Substitution | Nonsense             | 24% |
| MM04T | UNC5A   | unc-5 homolog A (C. elegans)                                        | CCDS34299.1 | chr5_176295233-176295233_C_T | 132S>L  | Substitution | Nonsynonymous coding | 21% |
| MM04T | UNC5D   | unc-5 homolog D (C. elegans)                                        | CCDS6093.2  | chr8_35542256-35542256_C_T   | 303S>F  | Substitution | Nonsynonymous coding | 30% |
| MM04T | UNC5D   | unc-5 homolog D (C. elegans)                                        | CCDS6093.2  | chr8_35583878-35583878_G_T   | 504K>N  | Substitution | Nonsynonymous coding | 29% |
| MM04T | UNC79   | unc-79 homolog (C. elegans)                                         | CCDS9911.2  | chr14_94088209-94088209_G_A  | 1367D>N | Substitution | Nonsynonymous coding | 37% |
| MM04T | UNC80   | unc-80 homolog (C. elegans)                                         | CCDS46504.1 | chr2_210690774-210690774_G_T | 825E>D  | Substitution | Nonsynonymous coding | 38% |
| MM04T | UNC80   | unc-80 homolog (C. elegans)                                         | CCDS46504.1 | chr2_210761087-210761087_A_C | 1445S>R | Substitution | Nonsynonymous coding | 31% |
| MM04T | UNC80   | unc-80 homolog (C. elegans)                                         | CCDS46504.1 | chr2_210834512-210834512_C_A | 2610P>H | Substitution | Nonsynonymous coding | 23% |
| MM04T | UPF2    | UPF2 regulator of nonsense transcripts homolog (yeast)              | CCDS7086.1  | chr10_11994078-11994078_G_T  | 1007F>L | Substitution | Nonsynonymous coding | 23% |
| MM04T | UPF2    | UPF2 regulator of nonsense transcripts homolog (yeast)              | CCDS7086.1  | chr10_12071315-12071315_C_A  | 192D>Y  | Substitution | Nonsynonymous coding | 22% |
| MM04T | UPP2    | uridine phosphorylase 2                                             | CCDS46435.1 | chr2_158977970-158977970_C_A | 225F>L  | Substitution | Nonsynonymous coding | 23% |
| MM04T | UQCRH   | ubiquinol-cytochrome c reductase hinge protein                      | CCDS30704.1 | chr1_46769462-46769462_G_T   | 8K>N    | Substitution | Nonsynonymous coding | 31% |
| MM04T | URB1    | URB1 ribosome biogenesis 1 homolog (S. cerevisiae)                  | CCDS46645.1 | chr21_33719513-33719514_TC_  | NA      | Deletion     | Frameshift           | 34% |
| MM04T | URB2    | URB2 ribosome biogenesis 2 homolog (S. cerevisiae)                  | CCDS31052.1 | chr1_229768082-229768082_G_T | 65D>Y   | Substitution | Nonsynonymous coding | 39% |
| MM04T | URB2    | URB2 ribosome biogenesis 2 homolog (S. cerevisiae)                  | CCDS31052.1 | chr1_229772495-229772495_G_A | 712R>K  | Substitution | Nonsynonymous coding | 26% |
| MM04T | URGCP   | upregulator of cell proliferation                                   | CCDS47578.1 | chr7_43917113-43917113_G_A   | 650A>V  | Substitution | Nonsynonymous coding | 27% |
| MM04T | URGCP   | upregulator of cell proliferation                                   | CCDS47578.1 | chr7_43921560-43921560_G_T   | NA      | Substitution | Splice site acceptor | 24% |

|       |       |                                               |                 |                               |         |              |                      |     |
|-------|-------|-----------------------------------------------|-----------------|-------------------------------|---------|--------------|----------------------|-----|
| MM04T | USH2A | Usher syndrome 2A (autosomal recessive, mild) | CCDS31025.1     | chr1_215901469-215901469_G_T  | 3990S>Y | Substitution | Nonsynonymous coding | 28% |
| MM04T | USH2A | Usher syndrome 2A (autosomal recessive, mild) | CCDS31025.1     | chr1_215901695-215901695_A_C  | 3915L>V | Substitution | Nonsynonymous coding | 48% |
| MM04T | USH2A | Usher syndrome 2A (autosomal recessive, mild) | CCDS31025.1     | chr1_215914813-215914813_G_T  | 3872S>Y | Substitution | Nonsynonymous coding | 14% |
| MM04T | USH2A | Usher syndrome 2A (autosomal recessive, mild) | CCDS31025.1     | chr1_215953252-215953252_C_A  | 3624Q>H | Substitution | Nonsynonymous coding | 20% |
| MM04T | USH2A | Usher syndrome 2A (autosomal recessive, mild) | CCDS31025.1     | chr1_215987234-215987234_C_T  | 3195G>R | Substitution | Nonsynonymous coding | 36% |
| MM04T | USH2A | Usher syndrome 2A (autosomal recessive, mild) | CCDS31025.1     | chr1_216074101-216074101_G_T  | 2483L>I | Substitution | Nonsynonymous coding | 21% |
| MM04T | USH2A | Usher syndrome 2A (autosomal recessive, mild) | CCDS31025.1     | chr1_216144031-216144031_G_T  | 2298P>H | Substitution | Nonsynonymous coding | 24% |
| MM04T | USH2A | Usher syndrome 2A (autosomal recessive, mild) | CCDS31025.1     | chr1_216144105-216144105_A_C  | 2273S>R | Substitution | Nonsynonymous coding | 20% |
| MM04T | USH2A | Usher syndrome 2A (autosomal recessive, mild) | CCDS31025.1     | chr1_216258043-216258043_C_A  | 1722A>S | Substitution | Nonsynonymous coding | 11% |
| MM04T | USH2A | Usher syndrome 2A (autosomal recessive, mild) | CCDS31025.1     | chr1_216424349-216424349_G_T  | 688P>H  | Substitution | Nonsynonymous coding | 18% |
| MM04T | USH2A | Usher syndrome 2A (autosomal recessive, mild) | CCDS31025.1     | chr1_216595264-216595264_G_T  | 139P>T  | Substitution | Nonsynonymous coding | 30% |
| MM04T | USH2A | Usher syndrome 2A (autosomal recessive, mild) | CCDS31025.1     | chr1_215960054-215960054_C_A  | 3449E>X | Substitution | Nonsense             | 23% |
| MM04T | USP2  | ubiquitin specific peptidase 2                | CCDS8423.1      | chr11_119234579-119234579_G_A | 43L>F   | Substitution | Nonsynonymous coding | 11% |
| MM04T | USP21 | ubiquitin specific peptidase 21               | CCDS30920.1     | chr1_161132774-161132774_G_A  | 320R>Q  | Substitution | Nonsynonymous coding | 33% |
| MM04T | USP21 | ubiquitin specific peptidase 21               | CCDS30920.1     | chr1_161134633-161134633_C_T  | 465R>X  | Substitution | Nonsense             | 36% |
| MM04T | USP24 | ubiquitin specific peptidase 24               | CCDS44154.1     | chr1_55562760-55562760_C_T    | 1774R>Q | Substitution | Nonsynonymous coding | 33% |
| MM04T | USP24 | ubiquitin specific peptidase 24               | CCDS44154.1     | chr1_55563691-55563691_A_C    | 1680I>M | Substitution | Nonsynonymous coding | 25% |
| MM04T | USP24 | ubiquitin specific peptidase 24               | CCDS44154.1     | chr1_55603315-55603315_G_T    | 865S>Y  | Substitution | Nonsynonymous coding | 25% |
| MM04T | USP25 | ubiquitin specific peptidase 25               | CCDS33515.1     | chr21_17202880-17202880_G_A   | 575R>Q  | Substitution | Nonsynonymous coding | 37% |
| MM04T | USP26 | ubiquitin specific peptidase 26               | CCDS14635.1     | chrX_132160312-132160312_C_T  | 646R>Q  | Substitution | Nonsynonymous coding | 19% |
| MM04T | USP26 | ubiquitin specific peptidase 26               | CCDS14635.1     | chrX_132161539-132161539_G_A  | 237S>F  | Substitution | Nonsynonymous coding | 33% |
| MM04T | USP29 | ubiquitin specific peptidase 29               | CCDS33124.1     | chr19_57641850-57641850_C_A   | 603L>I  | Substitution | Nonsynonymous coding | 22% |
| MM04T | USP31 | ubiquitin specific peptidase 31               | ENST00000381162 | chr16_23085253-23085253_C_A   | 12E>X   | Substitution | Nonsense             | 22% |
| MM04T | USP33 | ubiquitin specific peptidase 33               | CCDS678.1       | chr1_78177475-78177475_T_G    | 819K>T  | Substitution | Nonsynonymous coding | 21% |
| MM04T | USP34 | ubiquitin specific peptidase 34               | CCDS42686.1     | chr2_61522395-61522395_G_T    | 1429L>I | Substitution | Nonsynonymous coding | 34% |
| MM04T | USP34 | ubiquitin specific peptidase 34               | CCDS42686.1     | chr2_61561087-61561087_G_A    | 922R>C  | Substitution | Nonsynonymous coding | 22% |
| MM04T | USP34 | ubiquitin specific peptidase 34               | CCDS42686.1     | chr2_61566531-61566531_C_T    | 900R>Q  | Substitution | Nonsynonymous coding | 33% |
| MM04T | USP34 | ubiquitin specific peptidase 34               | CCDS42686.1     | chr2_61607492-61607492_A_C    | 276L>V  | Substitution | Nonsynonymous coding | 25% |
| MM04T | USP39 | ubiquitin specific peptidase 39               | CCDS33234.1     | chr2_85857985-85857985_A_C    | 289N>H  | Substitution | Nonsynonymous coding | 24% |
| MM04T | USP39 | ubiquitin specific peptidase 39               | CCDS33234.1     | chr2_85866511-85866511_G_T    | 427E>D  | Substitution | Nonsynonymous coding | 35% |
| MM04T | USP40 | ubiquitin specific peptidase 40               | CCDS46547.1     | chr2_234396895-234396895_C_T  | 1074E>K | Substitution | Nonsynonymous coding | 27% |
| MM04T | USP40 | ubiquitin specific peptidase 40               | CCDS46547.1     | chr2_234450938-234450938_C_A  | 358M>I  | Substitution | Nonsynonymous coding | 21% |



|       |       |                                                                       |             |                               |         |              |                      |     |
|-------|-------|-----------------------------------------------------------------------|-------------|-------------------------------|---------|--------------|----------------------|-----|
| MM04T | USP45 | ubiquitin specific peptidase 45                                       | CCDS34501.1 | chr6_99885135-99885135_C_A    | 767K>N  | Substitution | Nonsynonymous coding | 29% |
| MM04T | USP47 | ubiquitin specific peptidase 47                                       | CCDS41619.1 | chr11_11924385-11924385_C_A   | 171S>R  | Substitution | Nonsynonymous coding | 23% |
| MM04T | USP5  | ubiquitin specific peptidase 5 (isopeptidase T)                       | CCDS41743.1 | chr12_6971715-6971715_G_T     | 585K>N  | Substitution | Nonsynonymous coding | 19% |
| MM04T | USP50 | ubiquitin specific peptidase 50                                       | NM_203494   | chr15_50833415-50833415_C_A   | 169R>I  | Substitution | Nonsynonymous coding | 21% |
| MM04T | USP7  | ubiquitin specific peptidase 7 (herpes virus-associated)              | CCDS32385.1 | chr16_9009359-9009359_C_A     | 310K>N  | Substitution | Nonsynonymous coding | 16% |
| MM04T | USP8  | ubiquitin specific peptidase 8                                        | CCDS10137.1 | chr15_50776523-50776523_T_G   | 619F>V  | Substitution | Nonsynonymous coding | 27% |
| MM04T | USP8  | ubiquitin specific peptidase 8                                        | CCDS10137.1 | chr15_50786365-50786365_A_G   | 849D>G  | Substitution | Nonsynonymous coding | 18% |
| MM04T | USP8  | ubiquitin specific peptidase 8                                        | CCDS10137.1 | chr15_50791241-50791241_T_G   | 1105F>V | Substitution | Nonsynonymous coding | 38% |
| MM04T | USP9X | ubiquitin specific peptidase 9, X-linked                              | CCDS43930.1 | chrX_41055914-41055914_G_A    | 1386A>T | Substitution | Nonsynonymous coding | 39% |
| MM04T | USP9X | ubiquitin specific peptidase 9, X-linked                              | CCDS43930.1 | chrX_41089790-41089790_T_C    | 2506S>P | Substitution | Nonsynonymous coding | 23% |
| MM04T | USP9X | ubiquitin specific peptidase 9, X-linked                              | CCDS43930.1 | chrX_41048729-41048729_G_A    | NA      | Substitution | Splice site donor    | 34% |
| MM04T | USPL1 | ubiquitin specific peptidase like 1                                   | CCDS9336.1  | chr13_31216849-31216849_C_A   | 356S>Y  | Substitution | Nonsynonymous coding | 20% |
| MM04T | UTP20 | UTP20, small subunit (SSU) processome component, homolog (yeast)      | CCDS9081.1  | chr12_101674925-101674925_T_C | 26V>A   | Substitution | Nonsynonymous coding | 12% |
| MM04T | UTP20 | UTP20, small subunit (SSU) processome component, homolog (yeast)      | CCDS9081.1  | chr12_101736316-101736316_C_A | 1398F>L | Substitution | Nonsynonymous coding | 15% |
| MM04T | UTP20 | UTP20, small subunit (SSU) processome component, homolog (yeast)      | CCDS9081.1  | chr12_101750747-101750747_G_T | 1860E>X | Substitution | Nonsense             | 35% |
| MM04T | UTP6  | UTP6, small subunit (SSU) processome component, homolog (yeast)       | CCDS11269.1 | chr17_30226727-30226727_C_T   | 39D>N   | Substitution | Nonsynonymous coding | 35% |
| MM04T | UTRN  | utrophin                                                              | CCDS34547.1 | chr6_144780323-144780323_A_C  | 847N>T  | Substitution | Nonsynonymous coding | 24% |
| MM04T | UTRN  | utrophin                                                              | CCDS34547.1 | chr6_145124220-145124220_C_A  | 3098F>L | Substitution | Nonsynonymous coding | 31% |
| MM04T | UTRN  | utrophin                                                              | CCDS34547.1 | chr6_144760023-144760023_G_T  | 462E>X  | Substitution | Nonsense             | 19% |
| MM04T | UVSSA | UV-stimulated scaffold protein A                                      | CCDS33938.1 | chr4_1343584-1343584_T_C      | 124F>S  | Substitution | Nonsynonymous coding | 40% |
| MM04T | VAPB  | VAMP (vesicle-associated membrane protein)-associated protein B and C | CCDS33498.1 | chr20_57009697-57009697_G_T   | 84S>I   | Substitution | Nonsynonymous coding | 21% |
| MM04T | VASH1 | vasohibin 1                                                           | CCDS9851.1  | chr14_77229344-77229344_C_A   | 60F>L   | Substitution | Nonsynonymous coding | 23% |
| MM04T | VAV1  | vav 1 guanine nucleotide exchange factor                              | CCDS12174.1 | chr19_6828670-6828670_A_G     | 377N>S  | Substitution | Nonsynonymous coding | 19% |
| MM04T | VAV3  | vav 3 guanine nucleotide exchange factor                              | CCDS785.1   | chr1_108145740-108145740_A_C  | 687I>M  | Substitution | Nonsynonymous coding | 14% |
| MM04T | VAV3  | vav 3 guanine nucleotide exchange factor                              | CCDS785.1   | chr1_108507486-108507486_C_A  | 2E>D    | Substitution | Nonsynonymous coding | 24% |
| MM04T | VCAM1 | vascular cell adhesion molecule 1                                     | CCDS773.1   | chr1_101188822-101188822_G_A  | 196R>Q  | Substitution | Nonsynonymous coding | 37% |
| MM04T | VCAN  | versican                                                              | CCDS4060.1  | chr5_82815877-82815877_G_T    | 584K>N  | Substitution | Nonsynonymous coding | 32% |
| MM04T | VCAN  | versican                                                              | CCDS4060.1  | chr5_82816470-82816470_A_C    | 782N>T  | Substitution | Nonsynonymous coding | 40% |
| MM04T | VCAN  | versican                                                              | CCDS4060.1  | chr5_82834562-82834562_G_A    | 1914E>K | Substitution | Nonsynonymous coding | 31% |
| MM04T | VCAN  | versican                                                              | CCDS4060.1  | chr5_82815233-82815233_G_T    | 370E>X  | Substitution | Nonsense             | 31% |
| MM04T | VCAN  | versican                                                              | CCDS4060.1  | chr5_82817699-82817699_G_T    | 1192E>X | Substitution | Nonsense             | 23% |
| MM04T | VCL   | vinculin                                                              | CCDS7341.1  | chr10_75830502-75830502_G_A   | 105R>Q  | Substitution | Nonsynonymous coding | 32% |

|       |        |                                                       |             |                              |         |              |                      |     |
|-------|--------|-------------------------------------------------------|-------------|------------------------------|---------|--------------|----------------------|-----|
| MM04T | VEPH1  | ventricular zone expressed PH domain-containing 1     | CCDS3179.1  | chr3_157131731-157131731_C_A | 282R>I  | Substitution | Nonsynonymous coding | 30% |
| MM04T | VGLL2  | vestigial like 2 (Drosophila)                         | CCDS5115.1  | chr6_117589429-117589429_T_C | 56S>P   | Substitution | Nonsynonymous coding | 38% |
| MM04T | VIM    | vimentin                                              | CCDS7120.1  | chr10_17271679-17271679_C_A  | 86F>L   | Substitution | Nonsynonymous coding | 22% |
| MM04T | VIPR1  | vasoactive intestinal peptide receptor 1              | CCDS2698.1  | chr3_42569614-42569614_C_T   | 212S>L  | Substitution | Nonsynonymous coding | 31% |
| MM04T | VN1R2  | vomeronal 1 receptor 2                                | CCDS12862.1 | chr19_53762779-53762779_G_A  | 384R>K  | Substitution | Nonsynonymous coding | 32% |
| MM04T | VNN1   | vanin 1                                               | CCDS5159.1  | chr6_133013693-133013693_C_A | 286R>I  | Substitution | Nonsynonymous coding | 25% |
| MM04T | VNN2   | vanin 2                                               | CCDS5161.1  | chr6_133078886-133078886_G_T | 46S>Y   | Substitution | Nonsynonymous coding | 26% |
| MM04T | VPS13A | vacuolar protein sorting 13 homolog A (S. cerevisiae) | CCDS6655.1  | chr9_79834915-79834915_G_A   | 267R>Q  | Substitution | Nonsynonymous coding | 24% |
| MM04T | VPS13A | vacuolar protein sorting 13 homolog A (S. cerevisiae) | CCDS6655.1  | chr9_79836192-79836192_A_C   | 361K>Q  | Substitution | Nonsynonymous coding | 15% |
| MM04T | VPS13A | vacuolar protein sorting 13 homolog A (S. cerevisiae) | CCDS6655.1  | chr9_79836210-79836210_G_T   | 367E>X  | Substitution | Nonsense             | 34% |
| MM04T | VPS13B | vacuolar protein sorting 13 homolog B (yeast)         | CCDS6280.1  | chr8_100454826-100454826_G_T | 1136E>D | Substitution | Nonsynonymous coding | 36% |
| MM04T | VPS13B | vacuolar protein sorting 13 homolog B (yeast)         | CCDS6280.1  | chr8_100829870-100829870_C_T | 2759R>W | Substitution | Nonsynonymous coding | 33% |
| MM04T | VPS13B | vacuolar protein sorting 13 homolog B (yeast)         | CCDS6280.1  | chr8_100832183-100832183_C_T | 2968R>X | Substitution | Nonsense             | 17% |
| MM04T | VPS13C | vacuolar protein sorting 13 homolog C (S. cerevisiae) | CCDS32257.1 | chr15_62266517-62266517_C_A  | 836Q>H  | Substitution | Nonsynonymous coding | 19% |
| MM04T | VPS13C | vacuolar protein sorting 13 homolog C (S. cerevisiae) | CCDS32257.1 | chr15_62228795-62228795_C_T  | NA      | Substitution | Splice site donor    | 32% |
| MM04T | VPS13C | vacuolar protein sorting 13 homolog C (S. cerevisiae) | CCDS32257.1 | chr15_62254995-62254995_C_A  | 1130E>X | Substitution | Nonsense             | 21% |
| MM04T | VPS13D | vacuolar protein sorting 13 homolog D (S. cerevisiae) | CCDS30588.1 | chr1_12313784-12313784_G_T   | 190Q>H  | Substitution | Nonsynonymous coding | 32% |
| MM04T | VPS35  | vacuolar protein sorting 35 homolog (S. cerevisiae)   | CCDS10721.1 | chr16_46702948-46702948_C_T  | 514R>Q  | Substitution | Nonsynonymous coding | 29% |
| MM04T | VPS35  | vacuolar protein sorting 35 homolog (S. cerevisiae)   | CCDS10721.1 | chr16_46708575-46708575_A_   | NA      | Deletion     | Splice site acceptor | 13% |
| MM04T | VPS39  | vacuolar protein sorting 39 homolog (S. cerevisiae)   | CCDS10083.1 | chr15_42483712-42483712_G_T  | 62F>L   | Substitution | Nonsynonymous coding | 35% |
| MM04T | VPS41  | vacuolar protein sorting 41 homolog (S. cerevisiae)   | CCDS4547.1  | chr7_38813779-38813779_C_A   | 316E>D  | Substitution | Nonsynonymous coding | 17% |
| MM04T | VPS41  | vacuolar protein sorting 41 homolog (S. cerevisiae)   | CCDS4547.1  | chr7_38829415-38829415_C_T   | 257R>Q  | Substitution | Nonsynonymous coding | 15% |
| MM04T | VPS4A  | vacuolar protein sorting 4 homolog A (S. cerevisiae)  | CCDS45517.1 | chr16_69354656-69354656_T_G  | 279S>A  | Substitution | Nonsynonymous coding | 36% |
| MM04T | VPS8   | vacuolar protein sorting 8 homolog (S. cerevisiae)    | CCDS46971.1 | chr3_184612645-184612645_A   | NA      | Insertion    | Frameshift           | 19% |
| MM04T | VRK2   | vaccinia related kinase 2                             | CCDS1859.1  | chr2_58313555-58313555_G_A   | 113G>E  | Substitution | Nonsynonymous coding | 29% |
| MM04T | VRTN   | vertebrae development associated                      | CCDS9830.1  | chr14_74823964-74823964_G_A  | 160D>N  | Substitution | Nonsynonymous coding | 29% |
| MM04T | VSIG4  | V-set and immunoglobulin domain containing 4          | CCDS14383.1 | chrX_65253346-65253346_C_A   | 128D>Y  | Substitution | Nonsynonymous coding | 18% |
| MM04T | VTCN1  | V-set domain containing T cell activation inhibitor 1 | CCDS894.1   | chr1_117695864-117695864_G_T | 191F>L  | Substitution | Nonsynonymous coding | 40% |
| MM04T | VTCN1  | V-set domain containing T cell activation inhibitor 1 | CCDS894.1   | chr1_117712771-117712771_G_T | 19L>M   | Substitution | Nonsynonymous coding | 33% |
| MM04T | VWASB2 | von Willebrand factor A domain containing 5B2         | NM_138345   | chr3_183959518-183959518_G_A | 1141D>N | Substitution | Nonsynonymous coding | 38% |
| MM04T | VWA8   | von Willebrand factor A domain containing 8           | CCDS41881.1 | chr13_42465570-42465570_C_T  | 213D>N  | Substitution | Nonsynonymous coding | 23% |
| MM04T | VWCE   | von Willebrand factor C and EGF domains               | CCDS8002.1  | chr11_61044140-61044140_A_G  | 474S>P  | Substitution | Nonsynonymous coding | 27% |

|       |        |                                               |             |                              |         |              |                      |     |
|-------|--------|-----------------------------------------------|-------------|------------------------------|---------|--------------|----------------------|-----|
| MM04T | VWCE   | von Willebrand factor C and EGF domains       | CCDS8002.1  | chr11_61050302-61050302_C_T  | 206R>Q  | Substitution | Nonsynonymous coding | 32% |
| MM04T | VWF    | von Willebrand factor                         | CCDS8539.1  | chr12_6219561-6219561_C_A    | 171D>Y  | Substitution | Nonsynonymous coding | 16% |
| MM04T | WAC    | WW domain containing adaptor with coiled-coil | CCDS7159.1  | chr10_28903608-28903608_G_A  | 517R>H  | Substitution | Nonsynonymous coding | 36% |
| MM04T | WARS2  | tryptophanyl tRNA synthetase 2, mitochondrial | CCDS900.1   | chr1_119576721-119576721_G_T | 211L>I  | Substitution | Nonsynonymous coding | 19% |
| MM04T | WAS    | Wiskott-Aldrich syndrome                      | CCDS14303.1 | chrX_48549521-48549521_G_T   | 493D>Y  | Substitution | Nonsynonymous coding | 28% |
| MM04T | WASF3  | WAS protein family, member 3                  | CCDS9318.1  | chr13_27256847-27256847_C_T  | 363L>F  | Substitution | Nonsynonymous coding | 28% |
| MM04T | WBP4   | WW domain binding protein 4                   | CCDS9375.1  | chr13_41654879-41654879_C_T  | 285S>L  | Substitution | Nonsynonymous coding | 21% |
| MM04T | WBP5   | WW domain binding protein 5                   | CCDS14507.1 | chrX_102612767-102612767_C_A | 52S>Y   | Substitution | Nonsynonymous coding | 24% |
| MM04T | WDFY3  | WD repeat and FYVE domain containing 3        | CCDS3609.1  | chr4_85656266-85656266_G_A   | 2308S>L | Substitution | Nonsynonymous coding | 26% |
| MM04T | WDFY3  | WD repeat and FYVE domain containing 3        | CCDS3609.1  | chr4_85617299-85617299_C_A   | 2909E>X | Substitution | Nonsense             | 18% |
| MM04T | WDFY4  | WDFY family member 4                          | CCDS44385.1 | chr10_49937550-49937550_A_G  | 349T>A  | Substitution | Nonsynonymous coding | 35% |
| MM04T | WDFY4  | WDFY family member 4                          | CCDS44385.1 | chr10_49939431-49939431_A_C  | 469K>T  | Substitution | Nonsynonymous coding | 30% |
| MM04T | WDFY4  | WDFY family member 4                          | CCDS44385.1 | chr10_49983792-49983792_C_T  | 935S>L  | Substitution | Nonsynonymous coding | 19% |
| MM04T | WDFY4  | WDFY family member 4                          | CCDS44385.1 | chr10_50108280-50108280_G_T  | 2484E>D | Substitution | Nonsynonymous coding | 32% |
| MM04T | WDR19  | WD repeat domain 19                           | CCDS47042.1 | chr4_39188187-39188187_C_T   | 43R>C   | Substitution | Nonsynonymous coding | 44% |
| MM04T | WDR19  | WD repeat domain 19                           | CCDS47042.1 | chr4_39245931-39245931_C_T   | 829R>X  | Substitution | Nonsense             | 36% |
| MM04T | WDR26  | WD repeat domain 26                           | NM_025160   | chr1_224621600-224621600_T_G | 70N>H   | Substitution | Nonsynonymous coding | 24% |
| MM04T | WDR3   | WD repeat domain 3                            | CCDS898.1   | chr1_118477264-118477264_A_G | 114K>E  | Substitution | Nonsynonymous coding | 29% |
| MM04T | WDR3   | WD repeat domain 3                            | CCDS898.1   | chr1_118499701-118499701_G_T | 822E>X  | Substitution | Nonsense             | 34% |
| MM04T | WDR35  | WD repeat domain 35                           | CCDS33152.1 | chr2_20141566-20141566_A_C   | 638F>C  | Substitution | Nonsynonymous coding | 34% |
| MM04T | WDR35  | WD repeat domain 35                           | CCDS33152.1 | chr2_20169254-20169254_C_T   | 332R>Q  | Substitution | Nonsynonymous coding | 30% |
| MM04T | WDR35  | WD repeat domain 35                           | CCDS33152.1 | chr2_20169282-20169282_C_T   | 323D>N  | Substitution | Nonsynonymous coding | 25% |
| MM04T | WDR37  | WD repeat domain 37                           | CCDS7057.1  | chr10_1132292-1132292_G_A    | 200G>D  | Substitution | Nonsynonymous coding | 26% |
| MM04T | WDR43  | WD repeat domain 43                           | CCDS46251.1 | chr2_29124983-29124983_A_C   | 119K>T  | Substitution | Nonsynonymous coding | 35% |
| MM04T | WDR44  | WD repeat domain 44                           | CCDS14572.1 | chrX_117543570-117543570_G_A | 551R>Q  | Substitution | Nonsynonymous coding | 42% |
| MM04T | WDR45B | WD repeat domain 45B                          | CCDS11815.2 | chr17_80601838-80601838_T_G  | 43E>D   | Substitution | Nonsynonymous coding | 40% |
| MM04T | WDR49  | WD repeat domain 49                           | CCDS3201.1  | chr3_167196724-167196724_C_T | 679R>Q  | Substitution | Nonsynonymous coding | 30% |
| MM04T | WDR52  | WD repeat domain 52                           | CCDS2972.1  | chr3_113115522-113115522_C_T | 541R>Q  | Substitution | Nonsynonymous coding | 34% |
| MM04T | WDR5B  | WD repeat domain 5B                           | CCDS3012.1  | chr3_122134035-122134035_G_T | 114S>Y  | Substitution | Nonsynonymous coding | 37% |
| MM04T | WDR6   | WD repeat domain 6                            | CCDS2782.2  | chr3_49052661-49052661_G_T   | 1132E>D | Substitution | Nonsynonymous coding | 27% |
| MM04T | WDR63  | WD repeat domain 63                           | CCDS702.1   | chr1_85551539-85551539_G_A   | 189R>Q  | Substitution | Nonsynonymous coding | 49% |
| MM04T | WDR63  | WD repeat domain 63                           | CCDS702.1   | chr1_85564222-85564222_C_A   | 454L>I  | Substitution | Nonsynonymous coding | 43% |

|       |         |                                                       |                 |                               |         |              |                      |     |
|-------|---------|-------------------------------------------------------|-----------------|-------------------------------|---------|--------------|----------------------|-----|
| MM04T | WDR64   | WD repeat domain 64                                   | CCDS1619.1      | chr1_241912851-241912851_A_G  | 243T>A  | Substitution | Nonsynonymous coding | 31% |
| MM04T | WDR64   | WD repeat domain 64                                   | NM_144625       | chr1_241934960-241934960_C_A  | NA      | Substitution | Splice site acceptor | 18% |
| MM04T | WDR66   | WD repeat domain 66                                   | CCDS41853.1     | chr12_122361742-122361742_G_T | 198R>I  | Substitution | Nonsynonymous coding | 22% |
| MM04T | WDR66   | WD repeat domain 66                                   | CCDS41853.1     | chr12_122398591-122398591_G_A | 745R>Q  | Substitution | Nonsynonymous coding | 27% |
| MM04T | WDR67   | WD repeat domain 67                                   | CCDS56338.1     | chr8_124132346-124132346_T_G  | 496Y>X  | Substitution | Nonsense             | 14% |
| MM04T | WDR69   | WD repeat domain 69                                   | CCDS2470.1      | chr2_228750117-228750117_G_A  | 31D>N   | Substitution | Nonsynonymous coding | 28% |
| MM04T | WDR72   | WD repeat domain 72                                   | CCDS10151.1     | chr15_53992005-53992005_C_A   | 569E>D  | Substitution | Nonsynonymous coding | 35% |
| MM04T | WDR75   | WD repeat domain 75                                   | CCDS2298.1      | chr2_190338930-190338930_C_A  | 690L>I  | Substitution | Nonsynonymous coding | 32% |
| MM04T | WDR76   | WD repeat domain 76                                   | CCDS10106.1     | chr15_44134682-44134682_G_T   | 268G>X  | Substitution | Nonsense             | 23% |
| MM04T | WDR87   | WD repeat domain 87                                   | CCDS46063.1     | chr19_38377263-38377263_C_T   | 2311E>K | Substitution | Nonsynonymous coding | 33% |
| MM04T | WDR87   | WD repeat domain 87                                   | CCDS46063.1     | chr19_38380612-38380612_C_A   | 1194K>N | Substitution | Nonsynonymous coding | 25% |
| MM04T | WDR87   | WD repeat domain 87                                   | CCDS46063.1     | chr19_38384165-38384165_C_A   | 687Q>H  | Substitution | Nonsynonymous coding | 22% |
| MM04T | WDR87   | WD repeat domain 87                                   | CCDS46063.1     | chr19_38383342-38383342_C_A   | 962G>X  | Substitution | Nonsense             | 33% |
| MM04T | WDR88   | WD repeat domain 88                                   | CCDS12429.1     | chr19_33647413-33647413_A_C   | 321E>A  | Substitution | Nonsynonymous coding | 33% |
| MM04T | WDR96   | WD repeat domain 96                                   | CCDS31281.1     | chr10_105948072-105948072_C_A | 548R>I  | Substitution | Nonsynonymous coding | 19% |
| MM04T | WDR96   | WD repeat domain 96                                   | CCDS31281.1     | chr10_105922119-105922119_C_A | 1097E>X | Substitution | Nonsense             | 29% |
| MM04T | WFDC1   | WAP four-disulfide core domain 1                      | CCDS10946.1     | chr16_84358066-84358066_G_T   | 202E>X  | Substitution | Nonsense             | 21% |
| MM04T | WHSC1   | Wolf-Hirschhorn syndrome candidate 1                  | ENST00000350915 | chr4_1955003-1955003_C_A      | 45S>Y   | Substitution | Nonsynonymous coding | 31% |
| MM04T | WHSC1L1 | Wolf-Hirschhorn syndrome candidate 1-like 1           | CCDS43729.1     | chr8_38162828-38162828_C_T    | 793R>H  | Substitution | Nonsynonymous coding | 22% |
| MM04T | WIZ     | widely interspaced zinc finger motifs                 | ENST00000389282 | chr19_15550582-15550582_A_G   | 360F>S  | Substitution | Nonsynonymous coding | 18% |
| MM04T | WNK2    | WNK lysine deficient protein kinase 2                 | NM_006648       | chr9_96051652-96051652_C_G    | 1539P>R | Substitution | Nonsynonymous coding | 36% |
| MM04T | WNK3    | WNK lysine deficient protein kinase 3                 | CCDS14357.1     | chrX_54224858-54224858_G_A    | 1768P>S | Substitution | Nonsynonymous coding | 44% |
| MM04T | WNK3    | WNK lysine deficient protein kinase 3                 | CCDS14357.1     | chrX_54263906-54263906_T_G    | 1365N>H | Substitution | Nonsynonymous coding | 34% |
| MM04T | WNK3    | WNK lysine deficient protein kinase 3                 | CCDS14357.1     | chrX_54263777-54263777_C_A    | 1408E>X | Substitution | Nonsense             | 27% |
| MM04T | WNT11   | wingless-type MMTV integration site family, member 11 | CCDS8242.1      | chr11_75902637-75902637_C_A   | 287E>D  | Substitution | Nonsynonymous coding | 20% |
| MM04T | WNT2B   | wingless-type MMTV integration site family, member 2B | CCDS847.1       | chr1_113057714-113057714_G_T  | 134R>I  | Substitution | Nonsynonymous coding | 25% |
| MM04T | WNT3    | wingless-type MMTV integration site family, member 3  | CCDS11505.1     | chr17_44847360-44847360_G_A   | 126A>V  | Substitution | Nonsynonymous coding | 26% |
| MM04T | WNT3A   | wingless-type MMTV integration site family, member 3A | CCDS1564.1      | chr1_228194857-228194857_C_A  | 10L>I   | Substitution | Nonsynonymous coding | 17% |
| MM04T | WNT4    | wingless-type MMTV integration site family, member 4  | ENST00000374655 | chr1_22453936-22453936_G_T    | 118L>I  | Substitution | Nonsynonymous coding | 30% |
| MM04T | WNT7A   | wingless-type MMTV integration site family, member 7A | CCDS2616.1      | chr3_13896057-13896057_T_C    | 181N>S  | Substitution | Nonsynonymous coding | 31% |
| MM04T | WNT8A   | wingless-type MMTV integration site family, member 8A | CCDS43368.1     | chr5_137420328-137420328_A_G  | NA      | Substitution | Splice site donor    | 19% |
| MM04T | WRN     | Werner syndrome, RecQ helicase-like                   | CCDS6082.1      | chr8_30938628-30938628_T_C    | 362V>A  | Substitution | Nonsynonymous coding | 30% |

|       |        |                                                                        |                 |                              |         |              |                      |     |
|-------|--------|------------------------------------------------------------------------|-----------------|------------------------------|---------|--------------|----------------------|-----|
| MM04T | WT1-AS | WT1 antisense RNA                                                      | ENST00000395900 | chr11_32460485-32460485_G_A  | 20A>T   | Substitution | Nonsynonymous coding | 17% |
| MM04T | WT1-AS | WT1 antisense RNA                                                      | ENST00000395900 | chr11_32460534-32460534_C_T  | 36S>L   | Substitution | Nonsynonymous coding | 19% |
| MM04T | WWC1   | WW and C2 domain containing 1                                          | CCDS4366.1      | chr5_167857217-167857217_A_C | 692Q>H  | Substitution | Nonsynonymous coding | 35% |
| MM04T | WWC3   | WWC family member 3                                                    | CCDS14136.1     | chrX_10106932-10106932_C_T   | 1014R>W | Substitution | Nonsynonymous coding | 37% |
| MM04T | WWP2   | WW domain containing E3 ubiquitin protein ligase 2                     | CCDS10885.1     | chr16_69973017-69973017_G_A  | 811E>K  | Substitution | Nonsynonymous coding | 30% |
| MM04T | XBP1   | X-box binding protein 1                                                | NM_001079539    | chr22_29191342-29191342_T_G  | 318N>H  | Substitution | Nonsynonymous coding | 26% |
| MM04T | XIAP   | X-linked inhibitor of apoptosis                                        | CCDS14606.1     | chrX_123019646-123019646_C_T | 45S>L   | Substitution | Nonsynonymous coding | 31% |
| MM04T | XIRP1  | xin actin-binding repeat containing 1                                  | CCDS2683.1      | chr3_39226726-39226726_C_A   | 1404S>I | Substitution | Nonsynonymous coding | 18% |
| MM04T | XIRP1  | xin actin-binding repeat containing 1                                  | CCDS2683.1      | chr3_39225947-39225947_G_A   | 1664R>X | Substitution | Nonsense             | 17% |
| MM04T | XIRP2  | xin actin-binding repeat containing 2                                  | CCDS42769.1     | chr2_167760210-167760210_C_T | 73S>L   | Substitution | Nonsynonymous coding | 26% |
| MM04T | XIRP2  | xin actin-binding repeat containing 2                                  | CCDS42769.1     | chr2_168067335-168067335_C_T | 218S>F  | Substitution | Nonsynonymous coding | 20% |
| MM04T | XIRP2  | xin actin-binding repeat containing 2                                  | CCDS42769.1     | chr2_168099972-168099972_G_T | 690K>N  | Substitution | Nonsynonymous coding | 31% |
| MM04T | XIRP2  | xin actin-binding repeat containing 2                                  | CCDS42769.1     | chr2_168101234-168101234_C_T | 1111S>L | Substitution | Nonsynonymous coding | 40% |
| MM04T | XIRP2  | xin actin-binding repeat containing 2                                  | CCDS42769.1     | chr2_168104508-168104508_G_T | 2202K>N | Substitution | Nonsynonymous coding | 27% |
| MM04T | XIRP2  | xin actin-binding repeat containing 2                                  | CCDS42769.1     | chr2_168105113-168105113_C_A | 2404S>Y | Substitution | Nonsynonymous coding | 23% |
| MM04T | XIRP2  | xin actin-binding repeat containing 2                                  | CCDS42769.1     | chr2_168108332-168108332_G_T | 3477R>I | Substitution | Nonsynonymous coding | 27% |
| MM04T | XIRP2  | xin actin-binding repeat containing 2                                  | CCDS42768.1     | chr2_168115020-168115020_C_T | 655A>V  | Substitution | Nonsynonymous coding | 32% |
| MM04T | XIRP2  | xin actin-binding repeat containing 2                                  | CCDS42768.1     | chr2_168115189-168115189_T_G | 711N>K  | Substitution | Nonsynonymous coding | 27% |
| MM04T | XIRP2  | xin actin-binding repeat containing 2                                  | CCDS42769.1     | chr2_168099925-168099925_G_T | 675E>X  | Substitution | Nonsense             | 23% |
| MM04T | XIRP2  | xin actin-binding repeat containing 2                                  | CCDS42769.1     | chr2_168104212-168104212_G_T | 2104E>X | Substitution | Nonsense             | 27% |
| MM04T | XIRP2  | xin actin-binding repeat containing 2                                  | CCDS42769.1     | chr2_168105142-168105142_G_T | 2414G>X | Substitution | Nonsense             | 19% |
| MM04T | XKR3   | XK, Kell blood group complex subunit-related family, member 3          | CCDS42975.1     | chr22_17280897-17280897_C_A  | 118R>I  | Substitution | Nonsynonymous coding | 42% |
| MM04T | XKR6   | XK, Kell blood group complex subunit-related family, member 6          | CCDS5978.2      | chr8_10756032-10756032_C_A   | 452E>D  | Substitution | Nonsynonymous coding | 17% |
| MM04T | XKR9   | XK, Kell blood group complex subunit-related family, member 9          | CCDS34905.1     | chr8_71646348-71646348_C_A   | 271L>I  | Substitution | Nonsynonymous coding | 36% |
| MM04T | XPA    | xeroderma pigmentosum, complementation group A                         | CCDS6729.1      | chr9_100447259-100447259_G_A | 207R>X  | Substitution | Nonsense             | 15% |
| MM04T | XPC    | xeroderma pigmentosum, complementation group C                         | CCDS46763.1     | chr3_14207048-14207048_C_T   | 220R>Q  | Substitution | Nonsynonymous coding | 30% |
| MM04T | XPO1   | exportin 1 (CRM1 homolog, yeast)                                       | CCDS33205.1     | chr2_61717776-61717776_C_A   | NA      | Substitution | Splice site donor    | 19% |
| MM04T | XPO5   | exportin 5                                                             | CCDS47430.1     | chr6_43541337-43541337_A_C   | 36F>C   | Substitution | Nonsynonymous coding | 26% |
| MM04T | XRCC1  | X-ray repair complementing defective repair in Chinese hamster cells 1 | CCDS12624.1     | chr19_44057007-44057007_C_A  | 255K>N  | Substitution | Nonsynonymous coding | 34% |
| MM04T | XRCC1  | X-ray repair complementing defective repair in Chinese hamster cells 1 | CCDS12624.1     | chr19_44058887-44058887_G_A  | 109R>C  | Substitution | Nonsynonymous coding | 30% |
| MM04T | XRN2   | 5'-3' exoribonuclease 2                                                | CCDS13144.1     | chr20_21314470-21314470_G_T  | 354E>D  | Substitution | Nonsynonymous coding | 28% |
| MM04T | XRN2   | 5'-3' exoribonuclease 2                                                | CCDS13144.1     | chr20_21327175-21327175_G_T  | 551R>I  | Substitution | Nonsynonymous coding | 40% |

|       |        |                                                                              |                 |                               |         |              |                      |     |
|-------|--------|------------------------------------------------------------------------------|-----------------|-------------------------------|---------|--------------|----------------------|-----|
| MM04T | XYLT1  | xylosyltransferase I                                                         | CCDS10569.1     | chr16_17232365-17232365_C_A   | 537E>D  | Substitution | Nonsynonymous coding | 31% |
| MM04T | XYLT1  | xylosyltransferase I                                                         | CCDS10569.1     | chr16_17353100-17353100_C_T   | 220G>R  | Substitution | Nonsynonymous coding | 20% |
| MM04T | YAF2   | YY1 associated factor 2                                                      | CCDS31775.1     | chr12_42555495-42555495_C_A   | 75K>N   | Substitution | Nonsynonymous coding | 24% |
| MM04T | YIPF7  | Yip1 domain family, member 7                                                 | NM_182592       | chr4_44631527-44631527_A_C    | 131L>V  | Substitution | Nonsynonymous coding | 16% |
| MM04T | YLPM1  | YLP motif containing 1                                                       | CCDS45135.1     | chr14_75283313-75283313_C_A   | 1869L>I | Substitution | Nonsynonymous coding | 31% |
| MM04T | YOD1   | YOD1 OTU deubiquinating enzyme 1 homolog (S. cerevisiae)                     | CCDS31002.1     | chr1_207224035-207224035_G_T  | 114S>Y  | Substitution | Nonsynonymous coding | 36% |
| MM04T | YTHDC1 | YTH domain containing 1                                                      | CCDS33992.1     | chr4_69203501-69203501_C_A    | 83R>I   | Substitution | Nonsynonymous coding | 36% |
| MM04T | YTHDC2 | YTH domain containing 2                                                      | CCDS4113.1      | chr5_112868649-112868649_G_A  | 250R>Q  | Substitution | Nonsynonymous coding | 23% |
| MM04T | YTHDC2 | YTH domain containing 2                                                      | CCDS4113.1      | chr5_112889544-112889544_G_A  | 682R>Q  | Substitution | Nonsynonymous coding | 34% |
| MM04T | YWHAB  | tyrosine 3-monooxygenase/tryptophan 5-monooxygenase activation protein, beta | CCDS13339.1     | chr20_43533730-43533730_G_T   | 182E>D  | Substitution | Nonsynonymous coding | 21% |
| MM04T | YY1AP1 | YY1 associated protein 1                                                     | CCDS1115.1      | chr1_155630514-155630514_G_A  | 442A>V  | Substitution | Nonsynonymous coding | 21% |
| MM04T | ZAN    | zonadhesin                                                                   | ENST00000419263 | chr7_100348394-100348394_G_A  | 466E>K  | Substitution | Nonsynonymous coding | 22% |
| MM04T | ZAN    | zonadhesin                                                                   | ENST00000419263 | chr7_100388611-100388611_G_A  | 2468G>R | Substitution | Nonsynonymous coding | 28% |
| MM04T | ZAN    | zonadhesin                                                                   | ENST00000425997 | chr7_100390155-100390155_G_A  | 2613R>H | Substitution | Nonsynonymous coding | 23% |
| MM04T | ZAR1L  | zygote arrest 1-like                                                         | CCDS45023.1     | chr13_32878092-32878092_C_T   | 297R>Q  | Substitution | Nonsynonymous coding | 18% |
| MM04T | ZBBX   | zinc finger, B-box domain containing                                         | CCDS3199.2      | chr3_167090661-167090661_G_A  | 10P>L   | Substitution | Nonsynonymous coding | 31% |
| MM04T | ZBP1   | Z-DNA binding protein 1                                                      | CCDS13461.1     | chr20_56190072-56190072_C_T   | 125A>T  | Substitution | Nonsynonymous coding | 21% |
| MM04T | ZBTB1  | zinc finger and BTB domain containing 1                                      | CCDS45126.1     | chr14_64989726-64989726_G_T   | 502D>Y  | Substitution | Nonsynonymous coding | 24% |
| MM04T | ZBTB10 | zinc finger and BTB domain containing 10                                     | CCDS47880.1     | chr8_81412123-81412123_G_A    | 456R>Q  | Substitution | Nonsynonymous coding | 30% |
| MM04T | ZBTB10 | zinc finger and BTB domain containing 10                                     | CCDS47880.1     | chr8_81412490-81412490_C_A    | 578N>K  | Substitution | Nonsynonymous coding | 34% |
| MM04T | ZBTB10 | zinc finger and BTB domain containing 10                                     | ENST00000379091 | chr8_81398088-81398088_G_T    | 24E>X   | Substitution | Nonsense             | 21% |
| MM04T | ZBTB11 | zinc finger and BTB domain containing 11                                     | CCDS2943.1      | chr3_101370309-101370309_G_T  | 955H>N  | Substitution | Nonsynonymous coding | 22% |
| MM04T | ZBTB14 | zinc finger and BTB domain containing 14                                     | CCDS11837.1     | chr18_5291160-5291160_C_A     | 349K>N  | Substitution | Nonsynonymous coding | 29% |
| MM04T | ZBTB16 | zinc finger and BTB domain containing 16                                     | CCDS8367.1      | chr11_114112922-114112922_G_T | 496G>V  | Substitution | Nonsynonymous coding | 19% |
| MM04T | ZBTB18 | zinc finger and BTB domain containing 18                                     | CCDS1622.1      | chr1_244218015-244218015_T_G  | 313N>K  | Substitution | Nonsynonymous coding | 35% |
| MM04T | ZBTB21 | zinc finger and BTB domain containing 21                                     | CCDS13678.1     | chr21_43412136-43412136_T_G   | 690K>T  | Substitution | Nonsynonymous coding | 35% |
| MM04T | ZBTB26 | zinc finger and BTB domain containing 26                                     | CCDS6847.1      | chr9_125682119-125682119_A_C  | 32F>C   | Substitution | Nonsynonymous coding | 33% |
| MM04T | ZBTB43 | zinc finger and BTB domain containing 43                                     | CCDS6867.1      | chr9_129595642-129595642_C_T  | 285S>L  | Substitution | Nonsynonymous coding | 23% |
| MM04T | ZBTB43 | zinc finger and BTB domain containing 43                                     | CCDS6867.1      | chr9_129596134-129596134_C_A  | 449S>Y  | Substitution | Nonsynonymous coding | 23% |
| MM04T | ZBTB46 | zinc finger and BTB domain containing 46                                     | CCDS13538.1     | chr20_62421590-62421590_C_T   | 174R>Q  | Substitution | Nonsynonymous coding | 34% |
| MM04T | ZBTB49 | zinc finger and BTB domain containing 49                                     | CCDS3375.1      | chr4_4317658-4317658_C_T      | 528R>W  | Substitution | Nonsynonymous coding | 25% |
| MM04T | ZBTB7C | zinc finger and BTB domain containing 7C                                     | CCDS32830.1     | chr18_45567285-45567285_G_A   | 65A>V   | Substitution | Nonsynonymous coding | 32% |

|       |         |                                        |                 |                               |         |              |                      |     |
|-------|---------|----------------------------------------|-----------------|-------------------------------|---------|--------------|----------------------|-----|
| MM04T | ZC3H10  | zinc finger CCCH-type containing 10    | CCDS8903.1      | chr12_56515090-56515090_G_T   | 248R>S  | Substitution | Nonsynonymous coding | 27% |
| MM04T | ZC3H12C | zinc finger CCCH-type containing 12C   | CCDS44727.1     | chr11_110035605-110035605_C_A | 599L>M  | Substitution | Nonsynonymous coding | 37% |
| MM04T | ZC3H13  | zinc finger CCCH-type containing 13    | ENST00000242848 | chr13_46533748-46533748_G_A   | 1569A>V | Substitution | Nonsynonymous coding | 29% |
| MM04T | ZC3H18  | zinc finger CCCH-type containing 18    | CCDS10967.1     | chr16_88665046-88665046_G_T   | 286E>X  | Substitution | Nonsense             | 20% |
| MM04T | ZC3H6   | zinc finger CCCH-type containing 6     | CCDS46393.1     | chr2_113060830-113060830_A_C  | 80S>R   | Substitution | Nonsynonymous coding | 32% |
| MM04T | ZC3HAV1 | zinc finger CCCH-type, antiviral 1     | CCDS5851.1      | chr7_138732434-138732434_G_A  | 872S>L  | Substitution | Nonsynonymous coding | 19% |
| MM04T | ZC3HC1  | zinc finger, C3HC-type containing 1    | CCDS34753.1     | chr7_129666019-129666019_G_C  | 252S>C  | Substitution | Nonsynonymous coding | 35% |
| MM04T | ZC4H2   | zinc finger, C4H2 domain containing    | CCDS14380.1     | chrX_64139983-64139983_C_A    | 126E>X  | Substitution | Nonsense             | 33% |
| MM04T | ZCCHC14 | zinc finger, CCHC domain containing 14 | ENST00000412336 | chr16_87445046-87445046_C_A   | 957S>I  | Substitution | Nonsynonymous coding | 31% |
| MM04T | ZCCHC14 | zinc finger, CCHC domain containing 14 | CCDS10961.1     | chr16_87457471-87457471_G_T   | 125S>Y  | Substitution | Nonsynonymous coding | 28% |
| MM04T | ZCCHC18 | zinc finger, CCHC domain containing 18 | NM_001143978    | chrX_103359553-103359553_G_A  | 251A>T  | Substitution | Nonsynonymous coding | 23% |
| MM04T | ZCCHC2  | zinc finger, CCHC domain containing 2  | CCDS45880.1     | chr18_60241584-60241584_C_T   | 757A>V  | Substitution | Nonsynonymous coding | 37% |
| MM04T | ZCCHC5  | zinc finger, CCHC domain containing 5  | CCDS14440.1     | chrX_77912999-77912999_T_G    | 307S>R  | Substitution | Nonsynonymous coding | 34% |
| MM04T | ZCCHC6  | zinc finger, CCHC domain containing 6  | CCDS35057.1     | chr9_88940303-88940303_C_A    | 579E>X  | Substitution | Nonsense             | 24% |
| MM04T | ZCCHC7  | zinc finger, CCHC domain containing 7  | CCDS6608.2      | chr9_37126547-37126547_A_C    | 73K>T   | Substitution | Nonsynonymous coding | 16% |
| MM04T | ZCCHC7  | zinc finger, CCHC domain containing 7  | CCDS6608.2      | chr9_37126821-37126821_G_T    | 164E>D  | Substitution | Nonsynonymous coding | 30% |
| MM04T | ZCCHC8  | zinc finger, CCHC domain containing 8  | NM_017612       | chr12_122964834-122964834_A_C | 348V>G  | Substitution | Nonsynonymous coding | 34% |
| MM04T | ZDBF2   | zinc finger, DBF-type containing 2     | CCDS46501.1     | chr2_207174995-207174995_A_C  | 1915K>Q | Substitution | Nonsynonymous coding | 34% |
| MM04T | ZDBF2   | zinc finger, DBF-type containing 2     | CCDS46501.1     | chr2_207170390-207170390_G_T  | 380E>X  | Substitution | Nonsense             | 31% |
| MM04T | ZDBF2   | zinc finger, DBF-type containing 2     | CCDS46501.1     | chr2_207171569-207171569_G_T  | 773E>X  | Substitution | Nonsense             | 21% |
| MM04T | ZDHHC15 | zinc finger, DHHC-type containing 15   | NM_001146257    | chrX_74670594-74670594_T_C    | 132Y>C  | Substitution | Nonsynonymous coding | 29% |
| MM04T | ZDHHC17 | zinc finger, DHHC-type containing 17   | CCDS44946.1     | chr12_77220694-77220694_C_T   | 302R>W  | Substitution | Nonsynonymous coding | 33% |
| MM04T | ZDHHC19 | zinc finger, DHHC-type containing 19   | CCDS43190.1     | chr3_195938150-195938150_C_T  | 13E>K   | Substitution | Nonsynonymous coding | 19% |
| MM04T | ZDHHC23 | zinc finger, DHHC-type containing 23   | CCDS33827.1     | chr3_113672618-113672618_G_A  | 78R>Q   | Substitution | Nonsynonymous coding | 31% |
| MM04T | ZDHHC5  | zinc finger, DHHC-type containing 5    | CCDS7965.1      | chr11_57457837-57457837_C_A   | 196F>L  | Substitution | Nonsynonymous coding | 24% |
| MM04T | ZEB2    | zinc finger E-box binding homeobox 2   | CCDS2186.1      | chr2_145156336-145156336_G_T  | 806F>L  | Substitution | Nonsynonymous coding | 23% |
| MM04T | ZEB2    | zinc finger E-box binding homeobox 2   | CCDS2186.1      | chr2_145157774-145157774_G_A  | 327S>L  | Substitution | Nonsynonymous coding | 24% |
| MM04T | ZFAND4  | zinc finger, AN1-type domain 4         | CCDS7214.1      | chr10_46121400-46121400_A     | NA      | Insertion    | Frameshift           | 27% |
| MM04T | ZFC3H1  | zinc finger, C3H1-type containing      | CCDS41813.1     | chr12_72023470-72023470_A_C   | 1249F>V | Substitution | Nonsynonymous coding | 32% |
| MM04T | ZFC3H1  | zinc finger, C3H1-type containing      | CCDS41813.1     | chr12_72024652-72024652_A_C   | 1185F>V | Substitution | Nonsynonymous coding | 32% |
| MM04T | ZFC3H1  | zinc finger, C3H1-type containing      | CCDS41813.1     | chr12_72056981-72056981_C_T   | 137S>N  | Substitution | Nonsynonymous coding | 34% |
| MM04T | ZFHX2   | zinc finger homeobox 2                 | ENST00000419474 | chr14_23993066-23993066_C_T   | 2029D>N | Substitution | Nonsynonymous coding | 10% |

|       |         |                                          |                 |                              |         |              |                      |     |
|-------|---------|------------------------------------------|-----------------|------------------------------|---------|--------------|----------------------|-----|
| MM04T | ZFX3    | zinc finger homeobox 3                   | CCDS10908.1     | chr16_72822481-72822481_G_A  | 3232R>C | Substitution | Nonsynonymous coding | 39% |
| MM04T | ZFX3    | zinc finger homeobox 3                   | CCDS10908.1     | chr16_72830958-72830958_C_T  | 1875E>K | Substitution | Nonsynonymous coding | 35% |
| MM04T | ZFX3    | zinc finger homeobox 3                   | CCDS10908.1     | chr16_72993903-72993903_C_T  | 48G>R   | Substitution | Nonsynonymous coding | 46% |
| MM04T | ZFX4    | zinc finger homeobox 4                   | CCDS47878.1     | chr8_77761750-77761750_C_A   | 1171F>L | Substitution | Nonsynonymous coding | 37% |
| MM04T | ZFP1    | ZFP1 zinc finger protein                 | CCDS10914.2     | chr16_75200769-75200769_G_T  | 39E>D   | Substitution | Nonsynonymous coding | 22% |
| MM04T | ZFP14   | ZFP14 zinc finger protein                | CCDS33002.1     | chr19_36832078-36832078_C_T  | 217R>Q  | Substitution | Nonsynonymous coding | 28% |
| MM04T | ZFP14   | ZFP14 zinc finger protein                | CCDS33002.1     | chr19_36832177-36832177_C_T  | 184R>H  | Substitution | Nonsynonymous coding | 31% |
| MM04T | ZFP28   | ZFP28 zinc finger protein                | CCDS12946.1     | chr19_57066400-57066400_G_T  | 749R>I  | Substitution | Nonsynonymous coding | 39% |
| MM04T | ZFP28   | ZFP28 zinc finger protein                | CCDS12946.1     | chr19_57065826-57065826_G_T  | 558E>X  | Substitution | Nonsense             | 17% |
| MM04T | ZFP30   | ZFP30 zinc finger protein                | CCDS33005.1     | chr19_38126825-38126825_C_A  | 206R>I  | Substitution | Nonsynonymous coding | 31% |
| MM04T | ZFP30   | ZFP30 zinc finger protein                | CCDS33005.1     | chr19_38126256-38126256_C_A  | 396E>X  | Substitution | Nonsense             | 27% |
| MM04T | ZFP41   | ZFP41 zinc finger protein                | ENST00000344692 | chr8_144357014-144357014_C_T | 12R>C   | Substitution | Nonsynonymous coding | 27% |
| MM04T | ZFP42   | ZFP42 zinc finger protein                | CCDS3849.1      | chr4_188924375-188924375_G_T | 138E>D  | Substitution | Nonsynonymous coding | 34% |
| MM04T | ZFP42   | ZFP42 zinc finger protein                | CCDS3849.1      | chr4_188924520-188924520_G_A | 187A>T  | Substitution | Nonsynonymous coding | 28% |
| MM04T | ZFP57   | ZFP57 zinc finger protein                | CCDS43436.1     | chr6_29643715-29643715_G_T   | 62S>Y   | Substitution | Nonsynonymous coding | 20% |
| MM04T | ZFP69B  | ZFP69 zinc finger protein B              | CCDS452.1       | chr1_40928144-40928144_C_T   | 61S>L   | Substitution | Nonsynonymous coding | 28% |
| MM04T | ZFP82   | ZFP82 zinc finger protein                | CCDS12493.1     | chr19_36884673-36884673_C_A  | 190R>I  | Substitution | Nonsynonymous coding | 27% |
| MM04T | ZFP90   | ZFP90 zinc finger protein                | CCDS42183.1     | chr16_68597006-68597006_T_C  | 106S>P  | Substitution | Nonsynonymous coding | 26% |
| MM04T | ZFPM2   | zinc finger protein, FOG family member 2 | CCDS47908.1     | chr8_106814591-106814591_C_A | 761L>I  | Substitution | Nonsynonymous coding | 32% |
| MM04T | ZFR     | zinc finger RNA binding protein          | CCDS34139.1     | chr5_32400255-32400255_C_T   | 524E>K  | Substitution | Nonsynonymous coding | 18% |
| MM04T | ZFR     | zinc finger RNA binding protein          | CCDS34139.1     | chr5_32415076-32415076_G_T   | 261S>Y  | Substitution | Nonsynonymous coding | 28% |
| MM04T | ZFYVE20 | zinc finger, FYVE domain containing 20   | CCDS2623.1      | chr3_15122310-15122310_C_A   | NA      | Substitution | Splice site acceptor | 19% |
| MM04T | ZFYVE26 | zinc finger, FYVE domain containing 26   | CCDS9788.1      | chr14_68251891-68251891_C_A  | 1136K>N | Substitution | Nonsynonymous coding | 23% |
| MM04T | ZHX1    | zinc fingers and homeoboxes 1            | CCDS6342.1      | chr8_124267871-124267871_C_T | 106E>K  | Substitution | Nonsynonymous coding | 20% |
| MM04T | ZIC4    | Zic family member 4                      | CCDS43160.1     | chr3_147114121-147114121_C_T | 69G>E   | Substitution | Nonsynonymous coding | 30% |
| MM04T | ZIM3    | zinc finger, imprinted 3                 | CCDS33125.1     | chr19_57646623-57646623_C_A  | 361R>I  | Substitution | Nonsynonymous coding | 23% |
| MM04T | ZKSCAN2 | zinc finger with KRAB and SCAN domains 2 | CCDS32410.1     | chr16_25258304-25258304_G_A  | 405R>X  | Substitution | Nonsense             | 25% |
| MM04T | ZMAT1   | zinc finger, matrin-type 1               | CCDS35348.1     | chrX_101139356-101139356_C_A | 348R>I  | Substitution | Nonsynonymous coding | 29% |
| MM04T | ZMIZ1   | zinc finger, MIZ-type containing 1       | CCDS7357.1      | chr10_81072478-81072478_A_G  | 1059D>G | Substitution | Nonsynonymous coding | 13% |
| MM04T | ZMYND15 | zinc finger, MYND-type containing 15     | CCDS45584.1     | chr17_4644406-4644406_G_T    | 188R>I  | Substitution | Nonsynonymous coding | 27% |
| MM04T | ZNF101  | zinc finger protein 101                  | CCDS32971.1     | chr19_19791027-19791027_G_T  | 410R>I  | Substitution | Nonsynonymous coding | 35% |
| MM04T | ZNF106  | zinc finger protein 106                  | CCDS32208.1     | chr15_42731790-42731790_C_T  | 1306A>T | Substitution | Nonsynonymous coding | 16% |



|       |        |                         |             |                               |         |              |                      |     |
|-------|--------|-------------------------|-------------|-------------------------------|---------|--------------|----------------------|-----|
| MM04T | ZNF107 | zinc finger protein 107 | CCDS5527.1  | chr7_64167508-64167508_G_T    | 276E>X  | Substitution | Nonsense             | 27% |
| MM04T | ZNF12  | zinc finger protein 12  | CCDS47538.1 | chr7_6736988-6736988_G_T      | 74L>I   | Substitution | Nonsynonymous coding | 29% |
| MM04T | ZNF132 | zinc finger protein 132 | CCDS12980.1 | chr19_58944706-58944706_T_G   | 702K>T  | Substitution | Nonsynonymous coding | 22% |
| MM04T | ZNF132 | zinc finger protein 132 | CCDS12980.1 | chr19_58944797-58944797_G_A   | 672R>W  | Substitution | Nonsynonymous coding | 35% |
| MM04T | ZNF134 | zinc finger protein 134 | CCDS42638.1 | chr19_58131918-58131918_C_T   | 144T>I  | Substitution | Nonsynonymous coding | 30% |
| MM04T | ZNF138 | zinc finger protein 138 | CCDS34645.1 | chr7_64292015-64292015_A_C    | 75K>T   | Substitution | Nonsynonymous coding | 18% |
| MM04T | ZNF14  | zinc finger protein 14  | CCDS12409.1 | chr19_19822697-19822697_G_T   | 465H>N  | Substitution | Nonsynonymous coding | 28% |
| MM04T | ZNF143 | zinc finger protein 143 | CCDS7799.2  | chr11_9516259-9516259_C_T     | 238R>X  | Substitution | Nonsense             | 28% |
| MM04T | ZNF157 | zinc finger protein 157 | CCDS14278.1 | chrX_47272941-47272941_G_T    | 490R>I  | Substitution | Nonsynonymous coding | 41% |
| MM04T | ZNF160 | zinc finger protein 160 | CCDS12859.1 | chr19_53572226-53572226_G_A   | 521R>C  | Substitution | Nonsynonymous coding | 24% |
| MM04T | ZNF18  | zinc finger protein 18  | CCDS32568.1 | chr17_11886683-11886683_C_A   | 265E>X  | Substitution | Nonsense             | 28% |
| MM04T | ZNF180 | zinc finger protein 180 | CCDS12639.1 | chr19_44980992-44980992_C_T   | 569R>K  | Substitution | Nonsynonymous coding | 38% |
| MM04T | ZNF180 | zinc finger protein 180 | CCDS12639.1 | chr19_44981032-44981032_T_G   | 556K>Q  | Substitution | Nonsynonymous coding | 30% |
| MM04T | ZNF182 | zinc finger protein 182 | CCDS35236.1 | chrX_47835717-47835717_C_A    | 590R>I  | Substitution | Nonsynonymous coding | 32% |
| MM04T | ZNF184 | zinc finger protein 184 | CCDS4624.1  | chr6_27419689-27419689_C_A    | 550R>I  | Substitution | Nonsynonymous coding | 34% |
| MM04T | ZNF189 | zinc finger protein 189 | CCDS6754.1  | chr9_104162267-104162267_G_T  | 45E>D   | Substitution | Nonsynonymous coding | 40% |
| MM04T | ZNF189 | zinc finger protein 189 | CCDS6754.1  | chr9_104170946-104170946_G_A  | 299R>Q  | Substitution | Nonsynonymous coding | 29% |
| MM04T | ZNF202 | zinc finger protein 202 | CCDS8443.1  | chr11_123598960-123598960_G_T | 238T>K  | Substitution | Nonsynonymous coding | 37% |
| MM04T | ZNF212 | zinc finger protein 212 | CCDS5896.1  | chr7_148947280-148947280_A_C  | 19T>P   | Substitution | Nonsynonymous coding | 26% |
| MM04T | ZNF212 | zinc finger protein 212 | CCDS5896.1  | chr7_148950883-148950883_A_C  | 289K>Q  | Substitution | Nonsynonymous coding | 33% |
| MM04T | ZNF217 | zinc finger protein 217 | CCDS13443.1 | chr20_52199220-52199220_C_T   | 49R>Q   | Substitution | Nonsynonymous coding | 33% |
| MM04T | ZNF222 | zinc finger protein 222 | CCDS46098.1 | chr19_44536198-44536198_A_C   | 164Q>P  | Substitution | Nonsynonymous coding | 36% |
| MM04T | ZNF224 | zinc finger protein 224 | CCDS33046.1 | chr19_44612400-44612400_G_A   | 696R>Q  | Substitution | Nonsynonymous coding | 39% |
| MM04T | ZNF229 | zinc finger protein 229 | CCDS42574.1 | chr19_44933626-44933626_C_T   | 444A>T  | Substitution | Nonsynonymous coding | 29% |
| MM04T | ZNF23  | zinc finger protein 23  | CCDS10900.1 | chr16_71482273-71482273_C_A   | 552R>I  | Substitution | Nonsynonymous coding | 29% |
| MM04T | ZNF234 | zinc finger protein 234 | CCDS46101.1 | chr19_44660632-44660632_A_C   | 155K>Q  | Substitution | Nonsynonymous coding | 37% |
| MM04T | ZNF234 | zinc finger protein 234 | CCDS46101.1 | chr19_44661119-44661119_A_C   | 317K>T  | Substitution | Nonsynonymous coding | 31% |
| MM04T | ZNF236 | zinc finger protein 236 | CCDS42447.1 | chr18_74561507-74561507_G_T   | 25E>D   | Substitution | Nonsynonymous coding | 22% |
| MM04T | ZNF236 | zinc finger protein 236 | CCDS42447.1 | chr18_74635034-74635034_C_T   | 1187R>X | Substitution | Nonsense             | 28% |
| MM04T | ZNF236 | zinc finger protein 236 | CCDS42447.1 | chr18_74639913-74639913_C_A   | 1480S>X | Substitution | Nonsense             | 29% |
| MM04T | ZNF248 | zinc finger protein 248 | CCDS7194.1  | chr10_38121149-38121149_T_G   | 378K>N  | Substitution | Nonsynonymous coding | 29% |
| MM04T | ZNF248 | zinc finger protein 248 | CCDS7194.1  | chr10_38121555-38121555_T_G   | 243K>T  | Substitution | Nonsynonymous coding | 33% |

|       |         |                          |              |                               |         |              |                      |     |
|-------|---------|--------------------------|--------------|-------------------------------|---------|--------------|----------------------|-----|
| MM04T | ZNF257  | zinc finger protein 257  | CCDS46030.1  | chr19_22271382-22271382_G_T   | 277R>I  | Substitution | Nonsynonymous coding | 27% |
| MM04T | ZNF26   | zinc finger protein 26   | CCDS31939.1  | chr12_133586978-133586978_A_T | 171E>D  | Substitution | Nonsynonymous coding | 27% |
| MM04T | ZNF264  | zinc finger protein 264  | CCDS33127.1  | chr19_57723746-57723746_C_A   | 427F>L  | Substitution | Nonsynonymous coding | 38% |
| MM04T | ZNF267  | zinc finger protein 267  | CCDS32440.1  | chr16_31927189-31927189_G_T   | 540R>I  | Substitution | Nonsynonymous coding | 33% |
| MM04T | ZNF268  | zinc finger protein 268  | CCDS9283.1   | chr12_133732665-133732665_C_A | 278S>Y  | Substitution | Nonsynonymous coding | 25% |
| MM04T | ZNF268  | zinc finger protein 268  | CCDS45012.1  | chr12_133764497-133764497_A_T | 25I>F   | Substitution | Nonsynonymous coding | 29% |
| MM04T | ZNF280B | zinc finger protein 280B | CCDS13799.1  | chr22_22842434-22842434_C_A   | 430K>N  | Substitution | Nonsynonymous coding | 39% |
| MM04T | ZNF280B | zinc finger protein 280B | CCDS13799.1  | chr22_22842893-22842893_C_A   | 277K>N  | Substitution | Nonsynonymous coding | 23% |
| MM04T | ZNF280B | zinc finger protein 280B | CCDS13799.1  | chr22_22843648-22843648_C_T   | 26E>K   | Substitution | Nonsynonymous coding | 22% |
| MM04T | ZNF281  | zinc finger protein 281  | CCDS1402.1   | chr1_200376556-200376556_T_C  | 760T>A  | Substitution | Nonsynonymous coding | 27% |
| MM04T | ZNF281  | zinc finger protein 281  | CCDS1402.1   | chr1_200378085-200378085_T_C  | 250E>G  | Substitution | Nonsynonymous coding | 23% |
| MM04T | ZNF281  | zinc finger protein 281  | CCDS1402.1   | chr1_200378380-200378380_G_C  | 152L>V  | Substitution | Nonsynonymous coding | 30% |
| MM04T | ZNF283  | zinc finger protein 283  | CCDS12497.1  | chr19_37368220-37368220_G_A   | 163R>Q  | Substitution | Nonsynonymous coding | 39% |
| MM04T | ZNF283  | zinc finger protein 283  | CCDS46097.1  | chr19_44351583-44351583_G_A   | 277S>N  | Substitution | Nonsynonymous coding | 40% |
| MM04T | ZNF283  | zinc finger protein 283  | CCDS46097.1  | chr19_44352021-44352021_G_T   | 423R>I  | Substitution | Nonsynonymous coding | 27% |
| MM04T | ZNF284  | zinc finger protein 284  | CCDS46099.1  | chr19_44591055-44591055_G_T   | 475R>I  | Substitution | Nonsynonymous coding | 21% |
| MM04T | ZNF292  | zinc finger protein 292  | CCDS47457.1  | chr6_87968866-87968866_T_G    | 1840I>S | Substitution | Nonsynonymous coding | 36% |
| MM04T | ZNF292  | zinc finger protein 292  | CCDS47457.1  | chr6_87969864-87969864_C_T    | 2173R>X | Substitution | Nonsense             | 33% |
| MM04T | ZNF300  | zinc finger protein 300  | NM_052860    | chr5_150274997-150274997_C_T  | 602V>I  | Substitution | Nonsynonymous coding | 23% |
| MM04T | ZNF318  | zinc finger protein 318  | CCDS4895.2   | chr6_43323460-43323460_G_T    | 538L>I  | Substitution | Nonsynonymous coding | 21% |
| MM04T | ZNF324  | zinc finger protein 324  | CCDS12981.1  | chr19_58981097-58981097_C_A   | 42L>I   | Substitution | Nonsynonymous coding | 29% |
| MM04T | ZNF329  | zinc finger protein 329  | CCDS12972.1  | chr19_58640119-58640119_C_A   | 251R>I  | Substitution | Nonsynonymous coding | 35% |
| MM04T | ZNF334  | zinc finger protein 334  | CCDS33480.1  | chr20_45130604-45130604_C_A   | 458K>N  | Substitution | Nonsynonymous coding | 13% |
| MM04T | ZNF34   | zinc finger protein 34   | CCDS47945.1  | chr8_145999657-145999657_C_T  | 226R>H  | Substitution | Nonsynonymous coding | 21% |
| MM04T | ZNF354A | zinc finger protein 354A | CCDS4438.1   | chr5_178139322-178139322_C_A  | 519E>D  | Substitution | Nonsynonymous coding | 25% |
| MM04T | ZNF354A | zinc finger protein 354A | CCDS4438.1   | chr5_178139506-178139506_C_T  | 458R>Q  | Substitution | Nonsynonymous coding | 20% |
| MM04T | ZNF354B | zinc finger protein 354B | CCDS4439.1   | chr5_178311162-178311162_G_T  | 570R>I  | Substitution | Nonsynonymous coding | 26% |
| MM04T | ZNF37A  | zinc finger protein 37A  | CCDS31183.1  | chr10_38407009-38407009_G_T   | 310K>N  | Substitution | Nonsynonymous coding | 34% |
| MM04T | ZNF391  | zinc finger protein 391  | CCDS43429.1  | chr6_27368787-27368787_G_T    | 213R>L  | Substitution | Nonsynonymous coding | 26% |
| MM04T | ZNF404  | zinc finger protein 404  | NM_001033719 | chr19_44384224-44384224_G_A   | 22S>L   | Substitution | Nonsynonymous coding | 21% |
| MM04T | ZNF407  | zinc finger protein 407  | CCDS45885.1  | chr18_72343443-72343443_A_C   | 156E>D  | Substitution | Nonsynonymous coding | 25% |
| MM04T | ZNF420  | zinc finger protein 420  | CCDS12498.1  | chr19_37619629-37619629_G_A   | 579R>Q  | Substitution | Nonsynonymous coding | 36% |

|       |        |                         |                 |                              |         |              |                      |     |
|-------|--------|-------------------------|-----------------|------------------------------|---------|--------------|----------------------|-----|
| MM04T | ZNF420 | zinc finger protein 420 | CCDS12498.1     | chr19_37619853-37619853_C_T  | 654R>C  | Substitution | Nonsynonymous coding | 28% |
| MM04T | ZNF420 | zinc finger protein 420 | CCDS12498.1     | chr19_37619904-37619904_T_G  | 671F>V  | Substitution | Nonsynonymous coding | 30% |
| MM04T | ZNF420 | zinc finger protein 420 | CCDS12498.1     | chr19_37619660-37619660_C_A  | 589C>X  | Substitution | Nonsense             | 28% |
| MM04T | ZNF426 | zinc finger protein 426 | CCDS12215.1     | chr19_9639711-9639711_A_G    | 337V>A  | Substitution | Nonsynonymous coding | 33% |
| MM04T | ZNF429 | zinc finger protein 429 | CCDS42537.1     | chr19_21719517-21719517_G_T  | 221R>I  | Substitution | Nonsynonymous coding | 59% |
| MM04T | ZNF432 | zinc finger protein 432 | CCDS12848.1     | chr19_52537754-52537754_C_T  | 393R>Q  | Substitution | Nonsynonymous coding | 46% |
| MM04T | ZNF44  | zinc finger protein 44  | ENST00000426973 | chr19_12358183-12358183_C_T  | 511G>E  | Substitution | Nonsynonymous coding | 28% |
| MM04T | ZNF44  | zinc finger protein 44  | CCDS45988.1     | chr19_12383841-12383841_C_A  | 410R>I  | Substitution | Nonsynonymous coding | 25% |
| MM04T | ZNF44  | zinc finger protein 44  | CCDS45988.1     | chr19_12384168-12384168_C_A  | 301R>I  | Substitution | Nonsynonymous coding | 33% |
| MM04T | ZNF451 | zinc finger protein 451 | CCDS43477.1     | chr6_57006862-57006862_C_T   | 325R>C  | Substitution | Nonsynonymous coding | 18% |
| MM04T | ZNF454 | zinc finger protein 454 | CCDS4441.1      | chr5_178373962-178373962_G_T | 75E>D   | Substitution | Nonsynonymous coding | 34% |
| MM04T | ZNF454 | zinc finger protein 454 | CCDS4441.1      | chr5_178392612-178392612_C_T | 403R>W  | Substitution | Nonsynonymous coding | 22% |
| MM04T | ZNF460 | zinc finger protein 460 | CCDS12949.1     | chr19_57803422-57803422_G_A  | 505E>K  | Substitution | Nonsynonymous coding | 31% |
| MM04T | ZNF462 | zinc finger protein 462 | CCDS35096.1     | chr9_109689356-109689356_G_A | 1055E>K | Substitution | Nonsynonymous coding | 23% |
| MM04T | ZNF462 | zinc finger protein 462 | CCDS35096.1     | chr9_109691465-109691465_G_A | 1758E>K | Substitution | Nonsynonymous coding | 30% |
| MM04T | ZNF467 | zinc finger protein 467 | ENST00000378031 | chr7_149461579-149461579_G_T | 192F>L  | Substitution | Nonsynonymous coding | 17% |
| MM04T | ZNF467 | zinc finger protein 467 | ENST00000378031 | chr7_149461611-149461611_C_T | 182E>K  | Substitution | Nonsynonymous coding | 22% |
| MM04T | ZNF467 | zinc finger protein 467 | ENST00000378031 | chr7_149461670-149461670_G_A | 162P>L  | Substitution | Nonsynonymous coding | 30% |
| MM04T | ZNF470 | zinc finger protein 470 | CCDS33122.1     | chr19_57088960-57088960_G_A  | 388R>Q  | Substitution | Nonsynonymous coding | 27% |
| MM04T | ZNF470 | zinc finger protein 470 | CCDS33122.1     | chr19_57089047-57089047_G_T  | 417R>I  | Substitution | Nonsynonymous coding | 23% |
| MM04T | ZNF470 | zinc finger protein 470 | CCDS33122.1     | chr19_57089229-57089229_G_T  | 478E>X  | Substitution | Nonsense             | 28% |
| MM04T | ZNF473 | zinc finger protein 473 | CCDS33077.1     | chr19_50549318-50549318_G_T  | 540E>X  | Substitution | Nonsense             | 23% |
| MM04T | ZNF480 | zinc finger protein 480 | CCDS12850.2     | chr19_52825759-52825759_G_T  | 419R>I  | Substitution | Nonsynonymous coding | 68% |
| MM04T | ZNF480 | zinc finger protein 480 | CCDS12850.2     | chr19_52825859-52825859_G_T  | 452E>D  | Substitution | Nonsynonymous coding | 19% |
| MM04T | ZNF490 | zinc finger protein 490 | CCDS12272.1     | chr19_12691588-12691588_C_T  | 434R>Q  | Substitution | Nonsynonymous coding | 29% |
| MM04T | ZNF490 | zinc finger protein 490 | CCDS12272.1     | chr19_12692539-12692539_C_A  | NA      | Substitution | Splice site acceptor | 29% |
| MM04T | ZNF496 | zinc finger protein 496 | CCDS1631.1      | chr1_247492570-247492570_G_A | 104A>V  | Substitution | Nonsynonymous coding | 20% |
| MM04T | ZNF497 | zinc finger protein 497 | CCDS12977.1     | chr19_58868527-58868527_C_T  | 159E>K  | Substitution | Nonsynonymous coding | 23% |
| MM04T | ZNF510 | zinc finger protein 510 | CCDS35074.1     | chr9_99522488-99522488_C_A   | 208E>D  | Substitution | Nonsynonymous coding | 22% |
| MM04T | ZNF510 | zinc finger protein 510 | CCDS35074.1     | chr9_99525400-99525400_T_G   | 118K>Q  | Substitution | Nonsynonymous coding | 32% |
| MM04T | ZNF521 | zinc finger protein 521 | CCDS32806.1     | chr18_22805376-22805376_C_T  | 836E>K  | Substitution | Nonsynonymous coding | 24% |
| MM04T | ZNF521 | zinc finger protein 521 | CCDS32806.1     | chr18_22806432-22806432_C_T  | 484E>K  | Substitution | Nonsynonymous coding | 20% |

|       |         |                          |                 |                              |        |              |                      |     |
|-------|---------|--------------------------|-----------------|------------------------------|--------|--------------|----------------------|-----|
| MM04T | ZNF527  | zinc finger protein 527  | CCDS42559.1     | chr19_37880084-37880084_G_T  | 378R>I | Substitution | Nonsynonymous coding | 33% |
| MM04T | ZNF527  | zinc finger protein 527  | CCDS42559.1     | chr19_37880641-37880641_C_A  | 564H>N | Substitution | Nonsynonymous coding | 32% |
| MM04T | ZNF527  | zinc finger protein 527  | CCDS42559.1     | chr19_37880756-37880756_G_T  | 602R>I | Substitution | Nonsynonymous coding | 17% |
| MM04T | ZNF530  | zinc finger protein 530  | CCDS12955.1     | chr19_58117197-58117197_G_T  | 102D>Y | Substitution | Nonsynonymous coding | 30% |
| MM04T | ZNF541  | zinc finger protein 541  | CCDS46133.1     | chr19_48043509-48043509_G_A  | 849T>M | Substitution | Nonsynonymous coding | 38% |
| MM04T | ZNF541  | zinc finger protein 541  | CCDS46133.1     | chr19_48052589-48052589_G_T  | 154S>Y | Substitution | Nonsynonymous coding | 21% |
| MM04T | ZNF546  | zinc finger protein 546  | CCDS12548.1     | chr19_40521024-40521024_A_C  | 616K>T | Substitution | Nonsynonymous coding | 40% |
| MM04T | ZNF546  | zinc finger protein 546  | CCDS12548.1     | chr19_40521348-40521348_A_C  | 724K>T | Substitution | Nonsynonymous coding | 33% |
| MM04T | ZNF550  | zinc finger protein 550  | CCDS35500.1     | chr19_58058953-58058953_C_T  | 179R>Q | Substitution | Nonsynonymous coding | 24% |
| MM04T | ZNF560  | zinc finger protein 560  | CCDS12214.1     | chr19_9577577-9577577_C_A    | 682K>N | Substitution | Nonsynonymous coding | 24% |
| MM04T | ZNF560  | zinc finger protein 560  | CCDS12214.1     | chr19_9578954-9578954_G_T    | 223F>L | Substitution | Nonsynonymous coding | 22% |
| MM04T | ZNF564  | zinc finger protein 564  | CCDS42505.1     | chr19_12639164-12639164_C_A  | 49D>Y  | Substitution | Nonsynonymous coding | 21% |
| MM04T | ZNF567  | zinc finger protein 567  | CCDS12495.1     | chr19_37210694-37210694_G_T  | 325Q>H | Substitution | Nonsynonymous coding | 24% |
| MM04T | ZNF577  | zinc finger protein 577  | CCDS12842.2     | chr19_52375864-52375864_A_G  | 460I>T | Substitution | Nonsynonymous coding | 29% |
| MM04T | ZNF585A | zinc finger protein 585A | CCDS12499.1     | chr19_37643813-37643813_C_T  | 275E>K | Substitution | Nonsynonymous coding | 23% |
| MM04T | ZNF585A | zinc finger protein 585A | CCDS12499.1     | chr19_37644184-37644184_C_A  | 151R>I | Substitution | Nonsynonymous coding | 25% |
| MM04T | ZNF585A | zinc finger protein 585A | CCDS12499.1     | chr19_37644294-37644294_C_A  | 114Q>H | Substitution | Nonsynonymous coding | 36% |
| MM04T | ZNF585B | zinc finger protein 585B | CCDS12500.1     | chr19_37676966-37676966_C_A  | 491E>D | Substitution | Nonsynonymous coding | 38% |
| MM04T | ZNF594  | zinc finger protein 594  | CCDS42241.1     | chr17_5087028-5087028_C_A    | 175R>I | Substitution | Nonsynonymous coding | 37% |
| MM04T | ZNF594  | zinc finger protein 594  | ENST00000381752 | chr17_5084766-5084766_C_A    | 141E>X | Substitution | Nonsense             | 22% |
| MM04T | ZNF599  | zinc finger protein 599  | CCDS32991.1     | chr19_35250055-35250055_T_C  | 551T>A | Substitution | Nonsynonymous coding | 29% |
| MM04T | ZNF607  | zinc finger protein 607  | CCDS33006.1     | chr19_38190577-38190577_C_T  | 152S>N | Substitution | Nonsynonymous coding | 28% |
| MM04T | ZNF608  | zinc finger protein 608  | CCDS34219.1     | chr5_123983198-123983198_G_T | 960S>X | Substitution | Nonsense             | 37% |
| MM04T | ZNF610  | zinc finger protein 610  | CCDS12851.1     | chr19_52869129-52869129_A_C  | 166K>N | Substitution | Nonsynonymous coding | 44% |
| MM04T | ZNF613  | zinc finger protein 613  | CCDS33089.1     | chr19_52447399-52447399_A_C  | 88Q>P  | Substitution | Nonsynonymous coding | 32% |
| MM04T | ZNF614  | zinc finger protein 614  | CCDS12847.1     | chr19_52520442-52520442_A_C  | 137L>V | Substitution | Nonsynonymous coding | 40% |
| MM04T | ZNF615  | zinc finger protein 615  | CCDS12846.1     | chr19_52497222-52497222_C_A  | 369E>D | Substitution | Nonsynonymous coding | 21% |
| MM04T | ZNF616  | zinc finger protein 616  | CCDS33090.1     | chr19_52618611-52618611_C_A  | 602E>D | Substitution | Nonsynonymous coding | 29% |
| MM04T | ZNF616  | zinc finger protein 616  | CCDS33090.1     | chr19_52619215-52619215_C_T  | 401R>Q | Substitution | Nonsynonymous coding | 34% |
| MM04T | ZNF641  | zinc finger protein 641  | CCDS8763.1      | chr12_48737297-48737297_G_T  | 259S>Y | Substitution | Nonsynonymous coding | 20% |
| MM04T | ZNF641  | zinc finger protein 641  | CCDS8763.1      | chr12_48739220-48739220_G_T  | 119S>Y | Substitution | Nonsynonymous coding | 22% |
| MM04T | ZNF644  | zinc finger protein 644  | CCDS731.1       | chr1_91404144-91404144_C_T   | 923D>N | Substitution | Nonsynonymous coding | 23% |

|       |         |                               |                 |                               |        |              |                      |     |
|-------|---------|-------------------------------|-----------------|-------------------------------|--------|--------------|----------------------|-----|
| MM04T | ZNF644  | zinc finger protein 644       | CCDS731.1       | chr1_91404171-91404171_C_T    | 914D>N | Substitution | Nonsynonymous coding | 24% |
| MM04T | ZNF644  | zinc finger protein 644       | CCDS731.1       | chr1_91405467-91405467_G_A    | 482R>C | Substitution | Nonsynonymous coding | 28% |
| MM04T | ZNF645  | zinc finger protein 645       | CCDS14205.1     | chrX_22291313-22291313_C_T    | 69R>X  | Substitution | Nonsense             | 33% |
| MM04T | ZNF649  | zinc finger protein 649       | CCDS12843.1     | chr19_52394392-52394392_G_A   | 333L>F | Substitution | Nonsynonymous coding | 25% |
| MM04T | ZNF655  | zinc finger protein 655       | CCDS47655.1     | chr7_99170501-99170501_G_A    | 292R>Q | Substitution | Nonsynonymous coding | 30% |
| MM04T | ZNF660  | zinc finger protein 660       | CCDS2716.1      | chr3_44635761-44635761_G_T    | 26E>X  | Substitution | Nonsense             | 37% |
| MM04T | ZNF662  | zinc finger protein 662       | CCDS46807.1     | chr3_42956007-42956007_G_A    | 174E>K | Substitution | Nonsynonymous coding | 30% |
| MM04T | ZNF664  | zinc finger protein 664       | CCDS9257.1      | chr12_124496915-124496915_A_C | 75N>T  | Substitution | Nonsynonymous coding | 39% |
| MM04T | ZNF670  | zinc finger protein 670       | CCDS31087.1     | chr1_247201284-247201284_G_A  | 213R>C | Substitution | Nonsynonymous coding | 31% |
| MM04T | ZNF671  | zinc finger protein 671       | CCDS12961.1     | chr19_58232730-58232730_T_C   | 242T>A | Substitution | Nonsynonymous coding | 38% |
| MM04T | ZNF674  | zinc finger protein 674       | CCDS48099.1     | chrX_46359490-46359490_G_T    | 512L>I | Substitution | Nonsynonymous coding | 23% |
| MM04T | ZNF675  | zinc finger protein 675       | CCDS32981.1     | chr19_23836070-23836070_T_G   | 555K>N | Substitution | Nonsynonymous coding | 26% |
| MM04T | ZNF677  | zinc finger protein 677       | CCDS12861.1     | chr19_53741551-53741551_G_T   | 143F>L | Substitution | Nonsynonymous coding | 42% |
| MM04T | ZNF680  | zinc finger protein 680       | CCDS34644.1     | chr7_63981755-63981755_C_A    | 459E>D | Substitution | Nonsynonymous coding | 39% |
| MM04T | ZNF684  | zinc finger protein 684       | CCDS454.1       | chr1_41013103-41013103_C_A    | 370L>I | Substitution | Nonsynonymous coding | 42% |
| MM04T | ZNF7    | zinc finger protein 7         | CCDS6435.1      | chr8_146067431-146067431_A_C  | 313K>N | Substitution | Nonsynonymous coding | 31% |
| MM04T | ZNF7    | zinc finger protein 7         | CCDS6435.1      | chr8_146068538-146068538_A_C  | 682K>N | Substitution | Nonsynonymous coding | 22% |
| MM04T | ZNF709  | zinc finger protein 709       | CCDS42504.1     | chr19_12577292-12577292_G_T   | 58Q>K  | Substitution | Nonsynonymous coding | 24% |
| MM04T | ZNF709  | zinc finger protein 709       | CCDS42504.1     | chr19_12576018-12576018_G_A   | 240R>X | Substitution | Nonsense             | 31% |
| MM04T | ZNF711  | zinc finger protein 711       | CCDS35344.1     | chrX_84525909-84525909_G_T    | 454R>I | Substitution | Nonsynonymous coding | 47% |
| MM04T | ZNF711  | zinc finger protein 711       | CCDS35344.1     | chrX_84525917-84525917_G_A    | 457E>K | Substitution | Nonsynonymous coding | 19% |
| MM04T | ZNF713  | zinc finger protein 713       | CCDS34639.1     | chr7_56007670-56007670_C_T    | 422R>C | Substitution | Nonsynonymous coding | 30% |
| MM04T | ZNF718  | zinc finger protein 718       | NM_001039127    | chr4_155047-155047_G_T        | 191R>I | Substitution | Nonsynonymous coding | 24% |
| MM04T | ZNF729  | zinc finger protein 729       | ENST00000357491 | chr19_22496538-22496538_G_T   | 107V>L | Substitution | Nonsynonymous coding | 21% |
| MM04T | ZNF730  | zinc finger protein 730       | ENST00000327867 | chr19_23328173-23328173_G_T   | 109E>D | Substitution | Nonsynonymous coding | 31% |
| MM04T | ZNF730  | zinc finger protein 730       | ENST00000327867 | chr19_23328594-23328594_C_A   | 250H>N | Substitution | Nonsynonymous coding | 19% |
| MM04T | ZNF746  | zinc finger protein 746       | CCDS5897.1      | chr7_149189981-149189981_C_A  | 163K>N | Substitution | Nonsynonymous coding | 30% |
| MM04T | ZNF76   | zinc finger protein 76        | CCDS4801.1      | chr6_35259095-35259095_G_T    | 222E>D | Substitution | Nonsynonymous coding | 35% |
| MM04T | ZNF767  | zinc finger family member 767 | ENST00000335215 | chr7_149318543-149318543_C_A  | 44K>N  | Substitution | Nonsynonymous coding | 16% |
| MM04T | ZNF770  | zinc finger protein 770       | CCDS10042.1     | chr15_35273570-35273570_G_A   | 689S>L | Substitution | Nonsynonymous coding | 44% |
| MM04T | ZNF780B | zinc finger protein 780B      | ENST00000388801 | chr19_40539612-40539612_T_C   | 582K>R | Substitution | Nonsynonymous coding | 36% |
| MM04T | ZNF781  | zinc finger protein 781       | CCDS12507.1     | chr19_38160195-38160195_C_A   | 285M>I | Substitution | Nonsynonymous coding | 23% |

|       |         |                                                |                 |                               |         |              |                      |     |
|-------|---------|------------------------------------------------|-----------------|-------------------------------|---------|--------------|----------------------|-----|
| MM04T | ZNF781  | zinc finger protein 781                        | CCDS12507.1     | chr19_38160641-38160641_T_C   | 137K>E  | Substitution | Nonsynonymous coding | 35% |
| MM04T | ZNF786  | zinc finger protein 786                        | CCDS47738.1     | chr7_148769515-148769515_C_T  | 117D>N  | Substitution | Nonsynonymous coding | 25% |
| MM04T | ZNF788  | zinc finger family member 788                  | ENST00000339302 | chr19_12222997-12222997_G_A   | 212R>Q  | Substitution | Nonsynonymous coding | 24% |
| MM04T | ZNF790  | zinc finger protein 790                        | CCDS12496.1     | chr19_37310425-37310425_C_T   | 274R>Q  | Substitution | Nonsynonymous coding | 46% |
| MM04T | ZNF791  | zinc finger protein 791                        | CCDS12273.1     | chr19_12739148-12739148_G_T   | 269D>Y  | Substitution | Nonsynonymous coding | 28% |
| MM04T | ZNF791  | zinc finger protein 791                        | CCDS12273.1     | chr19_12739709-12739709_C_T   | 456R>X  | Substitution | Nonsense             | 28% |
| MM04T | ZNF804A | zinc finger protein 804A                       | CCDS2291.1      | chr2_185801081-185801081_T_C  | 320S>P  | Substitution | Nonsynonymous coding | 27% |
| MM04T | ZNF804A | zinc finger protein 804A                       | CCDS2291.1      | chr2_185802954-185802954_A_C  | 944N>T  | Substitution | Nonsynonymous coding | 33% |
| MM04T | ZNF804B | zinc finger protein 804B                       | CCDS5613.1      | chr7_88965709-88965709_C_A    | 1138S>Y | Substitution | Nonsynonymous coding | 26% |
| MM04T | ZNF804B | zinc finger protein 804B                       | CCDS5613.1      | chr7_88962858-88962858_C_T    | 188R>X  | Substitution | Nonsense             | 25% |
| MM04T | ZNF823  | zinc finger protein 823                        | CCDS45981.1     | chr19_11833762-11833762_A_G   | 196L>S  | Substitution | Nonsynonymous coding | 26% |
| MM04T | ZNF823  | zinc finger protein 823                        | CCDS45981.1     | chr19_11833810-11833810_C_T   | 180R>Q  | Substitution | Nonsynonymous coding | 23% |
| MM04T | ZNF823  | zinc finger protein 823                        | CCDS45981.1     | chr19_11833391-11833391_G_A   | 320R>X  | Substitution | Nonsense             | 36% |
| MM04T | ZNF827  | zinc finger protein 827                        | CCDS34072.1     | chr4_146791459-146791459_C_T  | 640G>E  | Substitution | Nonsynonymous coding | 29% |
| MM04T | ZNF83   | zinc finger protein 83                         | CCDS12854.1     | chr19_53117566-53117566_C_A   | 84E>D   | Substitution | Nonsynonymous coding | 30% |
| MM04T | ZNF831  | zinc finger protein 831                        | CCDS42894.1     | chr20_57829431-57829431_C_T   | 1556S>L | Substitution | Nonsynonymous coding | 37% |
| MM04T | ZNF836  | zinc finger protein 836                        | CCDS46162.1     | chr19_52659551-52659551_C_A   | 462R>I  | Substitution | Nonsynonymous coding | 25% |
| MM04T | ZNF84   | zinc finger protein 84                         | CCDS31940.1     | chr12_133635409-133635409_G_T | 703R>I  | Substitution | Nonsynonymous coding | 34% |
| MM04T | ZNF841  | zinc finger protein 841                        | CCDS46161.1     | chr19_52570041-52570041_C_A   | 365R>I  | Substitution | Nonsynonymous coding | 35% |
| MM04T | ZNF844  | zinc finger protein 844                        | CCDS45985.1     | chr19_12187353-12187353_G_T   | 473R>I  | Substitution | Nonsynonymous coding | 15% |
| MM04T | ZNF852  | zinc finger protein 852                        | ENST00000436261 | chr3_44541145-44541145_C_T    | 375R>Q  | Substitution | Nonsynonymous coding | 23% |
| MM04T | ZNF883  | zinc finger protein 883                        | NM_001101338    | chr9_115760310-115760310_G_A  | 77A>V   | Substitution | Nonsynonymous coding | 34% |
| MM04T | ZNF91   | zinc finger protein 91                         | CCDS42541.1     | chr19_23545244-23545244_C_A   | 179K>N  | Substitution | Nonsynonymous coding | 46% |
| MM04T | ZNF92   | zinc finger protein 92                         | CCDS34646.1     | chr7_64863354-64863354_G_T    | 109E>D  | Substitution | Nonsynonymous coding | 27% |
| MM04T | ZNFX1   | zinc finger, NFX1-type containing 1            | CCDS13417.1     | chr20_47864358-47864358_C_A   | 1735E>X | Substitution | Nonsense             | 33% |
| MM04T | ZNHIT3  | zinc finger, HIT-type containing 3             | CCDS11312.1     | chr17_34842547-34842547_G_A   | 2A>T    | Substitution | Nonsynonymous coding | 18% |
| MM04T | ZNRF2   | zinc and ring finger 2                         | CCDS5426.1      | chr7_30402015-30402015_G_T    | 232V>L  | Substitution | Nonsynonymous coding | 17% |
| MM04T | ZNRF4   | zinc and ring finger 4                         | CCDS42475.1     | chr19_5455788-5455788_G_A     | 96A>T   | Substitution | Nonsynonymous coding | 16% |
| MM04T | ZP1     | zona pellucida glycoprotein 1 (sperm receptor) | CCDS31572.1     | chr11_60637374-60637374_G_A   | NA      | Substitution | Splice site donor    | 35% |
| MM04T | ZP2     | zona pellucida glycoprotein 2 (sperm receptor) | CCDS10596.1     | chr16_21215415-21215415_C_A   | 303G>V  | Substitution | Nonsynonymous coding | 21% |
| MM04T | ZP4     | zona pellucida glycoprotein 4                  | CCDS1615.1      | chr1_238053227-238053227_C_T  | 114A>T  | Substitution | Nonsynonymous coding | 38% |
| MM04T | ZPBP    | zona pellucida binding protein                 | CCDS5509.1      | chr7_50023098-50023098_C_A    | 267E>D  | Substitution | Nonsynonymous coding | 38% |

|       |          |                                                        |                 |                               |         |              |                      |     |
|-------|----------|--------------------------------------------------------|-----------------|-------------------------------|---------|--------------|----------------------|-----|
| MM04T | ZRANB3   | zinc finger, RAN-binding domain containing 3           | CCDS46419.1     | chr2_135985423-135985423_T_G  | 706K>T  | Substitution | Nonsynonymous coding | 42% |
| MM04T | ZRANB3   | zinc finger, RAN-binding domain containing 3           | CCDS46419.1     | chr2_136111090-136111090_C_A  | 97E>X   | Substitution | Nonsense             | 28% |
| MM04T | ZSCAN20  | zinc finger and SCAN domain containing 20              | CCDS41300.1     | chr1_33954169-33954169_G_T    | 174Q>H  | Substitution | Nonsynonymous coding | 14% |
| MM04T | ZSCAN20  | zinc finger and SCAN domain containing 20              | CCDS41300.1     | chr1_33960020-33960020_G_T    | 692E>D  | Substitution | Nonsynonymous coding | 16% |
| MM04T | ZSCAN30  | zinc finger and SCAN domain containing 30              | CCDS42427.1     | chr18_32833517-32833517_C_A   | 461R>I  | Substitution | Nonsynonymous coding | 26% |
| MM04T | ZSCAN4   | zinc finger and SCAN domain containing 4               | CCDS12958.1     | chr19_58187767-58187767_C_A   | 85S>Y   | Substitution | Nonsynonymous coding | 38% |
| MM04T | ZSWIM2   | zinc finger, SWIM-type containing 2                    | CCDS33348.1     | chr2_187703837-187703837_G_A  | 115R>X  | Substitution | Nonsense             | 31% |
| MM04T | ZSWIM6   | zinc finger, SWIM-type containing 6                    | CCDS47215.1     | chr5_60835431-60835431_C_T    | 850R>W  | Substitution | Nonsynonymous coding | 30% |
| MM04T | ZUFSP    | zinc finger with UFM1-specific peptidase domain        | CCDS5110.1      | chr6_116967088-116967088_C_T  | 493R>Q  | Substitution | Nonsynonymous coding | 46% |
| MM04T | ZXDC     | ZXD family zinc finger C                               | CCDS43145.1     | chr3_126191110-126191110_A_G  | 316S>P  | Substitution | Nonsynonymous coding | 29% |
| MM04T | ZYG11A   | zyg-11 family member A, cell cycle regulator           | CCDS44148.1     | chr1_53329764-53329764_C_T    | 421R>C  | Substitution | Nonsynonymous coding | 23% |
| MM04T | ZZZ3     | zinc finger, ZZ-type containing 3                      | CCDS677.1       | chr1_78046723-78046723_T_G    | 647K>T  | Substitution | Nonsynonymous coding | 33% |
| MM04T | ZZZ3     | zinc finger, ZZ-type containing 3                      | CCDS677.1       | chr1_78097945-78097945_C_A    | 365M>I  | Substitution | Nonsynonymous coding | 28% |
| MM05T | ABCA7    | ATP-binding cassette, sub-family A (ABC1), member 7    | CCDS12055.1     | chr19_1047226-1047226_C_T     | 639T>M  | Substitution | Nonsynonymous coding | 23% |
| MM05T | ABCB1    | ATP-binding cassette, sub-family B (MDR/TAP), member 1 | CCDS5608.1      | chr7_87148690-87148690_C_T    | 960G>E  | Substitution | Nonsynonymous coding | 14% |
| MM05T | ANKIB1   | ankyrin repeat and IBR domain containing 1             | CCDS47639.1     | chr7_92027526-92027526_G_T    | 845A>S  | Substitution | Nonsynonymous coding | 10% |
| MM05T | ARHGAP20 | Rho GTPase activating protein 20                       | CCDS31673.1     | chr11_110450636-110450636_G_A | 1012R>C | Substitution | Nonsynonymous coding | 22% |
| MM05T | ARID1A   | AT rich interactive domain 1A (SWI-like)               | CCDS285.1       | chr1_27059260-27059261_CA_    | NA      | Deletion     | Frameshift           | 42% |
| MM05T | ARID1B   | AT rich interactive domain 1B (SWI-like)               | CCDS5251.1      | chr6_157527324-157527324_A_   | NA      | Deletion     | Frameshift           | 21% |
| MM05T | ARID1B   | AT rich interactive domain 1B (SWI-like)               | CCDS5251.1      | chr6_157511262-157511262_C_A  | 1242Y>X | Substitution | Nonsense             | 15% |
| MM05T | ASXL2    | additional sex combs like 2 (Drosophila)               | NM_018263       | chr2_25965531-25965531_G_C    | 1225C>W | Substitution | Nonsynonymous coding | 20% |
| MM05T | AXIN1    | axin 1                                                 | CCDS10405.1     | chr16_396257-396257_C_T       | 257D>N  | Substitution | Nonsynonymous coding | 21% |
| MM05T | AZIN1    | antizyme inhibitor 1                                   | CCDS6295.1      | chr8_103851964-103851964_G_A  | 64P>S   | Substitution | Nonsynonymous coding | 11% |
| MM05T | C1orf147 | chromosome 1 open reading frame 147                    | ENST00000367119 | chr1_206666268-206666268_C_T  | 89G>E   | Substitution | Nonsynonymous coding | 22% |
| MM05T | CASC5    | cancer susceptibility candidate 5                      | CCDS42023.1     | chr15_40916868-40916868_A_C   | 1495K>T | Substitution | Nonsynonymous coding | 16% |
| MM05T | DCP2     | DCP2 decapping enzyme homolog (S. cerevisiae)          | CCDS34210.1     | chr5_112337135-112337135_A_G  | 223N>D  | Substitution | Nonsynonymous coding | 22% |
| MM05T | DGAT2L7P | diacylglycerol O-acyltransferase 2-like 7, pseudogene  | ENST00000379421 | chr7_100845569-100845569_G_T  | 138L>I  | Substitution | Nonsynonymous coding | 19% |
| MM05T | DGKI     | diacylglycerol kinase, iota                            | CCDS5845.1      | chr7_137374705-137374705_G_T  | 149H>N  | Substitution | Nonsynonymous coding | 27% |
| MM05T | DNM1P46  | DNM1 pseudogene 46                                     | ENST00000423248 | chr15_100332842-100332842_T   | NA      | Insertion    | Frameshift           | 12% |
| MM05T | FSTL5    | follicle-stimulating-like 5                            | CCDS3802.1      | chr4_163032431-163032431_G_A  | 40R>X   | Substitution | Nonsense             | 18% |
| MM05T | GYG2     | glycogenin 2                                           | CCDS14121.1     | chrX_2773052-2773052_G_T      | 146E>X  | Substitution | Nonsense             | 22% |
| MM05T | HEXA     | hexosaminidase A (alpha polypeptide)                   | CCDS10243.1     | chr15_72640388-72640388_C_T   | NA      | Substitution | Splice site donor    | 14% |

|       |          |                                                                         |                 |                               |         |              |                      |     |
|-------|----------|-------------------------------------------------------------------------|-----------------|-------------------------------|---------|--------------|----------------------|-----|
| MM05T | HRNR     | hornerin                                                                | CCDS30859.1     | chr1_152191074-152191074_G_A  | 1011R>C | Substitution | Nonsynonymous coding | 24% |
| MM05T | IGLV5-48 | immunoglobulin lambda variable 5-48 (non-functional)                    | ENST00000390293 | chr22_22707728-22707728_C_T   | 106Q>X  | Substitution | Nonsense             | 22% |
| MM05T | ITGA9    | integrin, alpha 9                                                       | CCDS2669.1      | chr3_37555284-37555284_G_A    | 310A>T  | Substitution | Nonsynonymous coding | 18% |
| MM05T | JAK1     | Janus kinase 1                                                          | CCDS41346.1     | chr1_65312421-65312421_T_G    | NA      | Substitution | Splice site acceptor | 25% |
| MM05T | KCNQ2    | potassium voltage-gated channel, KQT-like subfamily, member 2           | ENST00000370222 | chr20_62044647-62044647_T_C   | 612Q>R  | Substitution | Nonsynonymous coding | 27% |
| MM05T | KRAS     | v-Ki-ras2 Kirsten rat sarcoma viral oncogene homolog                    | CCDS8703.1      | chr12_25398284-25398284_C_A   | 12G>V   | Substitution | Nonsynonymous coding | 14% |
| MM05T | LRRC10   | leucine rich repeat containing 10                                       | CCDS31856.1     | chr12_70003915-70003915_C_T   | 235R>H  | Substitution | Nonsynonymous coding | 17% |
| MM05T | MBNL2    | muscleblind-like splicing regulator 2                                   | CCDS9484.1      | chr13_97986632-97986632_G_A   | 93A>T   | Substitution | Nonsynonymous coding | 14% |
| MM05T | NSUN2    | NOP2/Sun RNA methyltransferase family, member 2                         | CCDS3869.1      | chr5_6609961-6609961_G_A      | 434P>L  | Substitution | Nonsynonymous coding | 19% |
| MM05T | NUP153   | nucleoporin 153kDa                                                      | CCDS4541.1      | chr6_17675809-17675809_T_C    | 176H>R  | Substitution | Nonsynonymous coding | 20% |
| MM05T | PIK3CA   | phosphatidylinositol-4,5-bisphosphate 3-kinase, catalytic subunit alpha | CCDS43171.1     | chr3_178936091-178936091_G_A  | 545E>K  | Substitution | Nonsynonymous coding | 13% |
| MM05T | RASSF4   | Ras association (RalGDS/AF-6) domain family member 4                    | ENST00000334940 | chr10_45479390-45479390_G_A   | 77G>S   | Substitution | Nonsynonymous coding | 20% |
| MM05T | RGS20    | regulator of G-protein signaling 20                                     | CCDS6155.1      | chr8_54866739-54866739_G_T    | 283E>X  | Substitution | Nonsense             | 27% |
| MM05T | SLC5A3   | solute carrier family 5 (sodium/myo-inositol cotransporter), member 3   | CCDS33549.1     | chr21_35469455-35469455_G_A   | 653R>Q  | Substitution | Nonsynonymous coding | 23% |
| MM05T | SLC5A4   | solute carrier family 5 (low affinity glucose cotransporter), member 4  | CCDS13903.1     | chr22_32643472-32643472_G_A   | 135R>W  | Substitution | Nonsynonymous coding | 18% |
| MM05T | SLC7A14  | solute carrier family 7 (orphan transporter), member 14                 | CCDS33892.1     | chr3_170201305-170201305_C_T  | 305V>M  | Substitution | Nonsynonymous coding | 18% |
| MM05T | TAS2R39  | taste receptor, type 2, member 39                                       | CCDS47729.1     | chr7_142881325-142881325_A_C  | 272I>L  | Substitution | Nonsynonymous coding | 28% |
| MM05T | THOC3    | THO complex 3                                                           | CCDS4397.1      | chr5_175395058-175395058_G_   | NA      | Deletion     | Frameshift           | 13% |
| MM05T | WDR45B   | WD repeat domain 45B                                                    | CCDS11815.2     | chr17_80585167-80585170_ACTG_ | NA      | Deletion     | Splice site acceptor | 20% |
| MM05T | ZFYVE26  | zinc finger, FYVE domain containing 26                                  | CCDS9788.1      | chr14_68229394-68229394_C_T   | 2052V>I | Substitution | Nonsynonymous coding | 27% |
| MM05T | ZMIZ2    | zinc finger, MIZ-type containing 2                                      | CCDS43576.1     | chr7_44798880-44798880_G_A    | 272V>M  | Substitution | Nonsynonymous coding | 20% |
| MM06T | ADAMTS10 | ADAM metalloproteinase with thrombospondin type 1 motif, 10             | CCDS12206.1     | chr19_8670129-8670129_G_A     | 68T>M   | Substitution | Nonsynonymous coding | 17% |
| MM06T | ARHGAP32 | Rho GTPase activating protein 32                                        | CCDS44769.1     | chr11_128840478-128840478_T_C | 1530M>V | Substitution | Nonsynonymous coding | 34% |
| MM06T | ARID1A   | AT rich interactive domain 1A (SWI-like)                                | CCDS285.1       | chr1_27023560-27023560_C_     | NA      | Deletion     | Frameshift           | 26% |
| MM06T | BCL2L11  | BCL2-like 11 (apoptosis facilitator)                                    | CCDS2089.1      | chr2_111907671-111907671_G    | NA      | Insertion    | Frameshift           | 27% |
| MM06T | DNAH6    | dynein, axonemal, heavy chain 6                                         | CCDS46348.1     | chr2_84756035-84756035_G_A    | 136R>Q  | Substitution | Nonsynonymous coding | 55% |
| MM06T | EGFR     | epidermal growth factor receptor                                        | CCDS5515.1      | chr7_55238153-55238153_G_     | NA      | Deletion     | Frameshift           | 17% |
| MM06T | FBXW7    | F-box and WD repeat domain containing 7, E3 ubiquitin protein ligase    | CCDS3777.1      | chr4_153247294-153247294_G_A  | 503A>V  | Substitution | Nonsynonymous coding | 26% |
| MM06T | HMCN1    | hemicentin 1                                                            | CCDS30956.1     | chr1_186057077-186057077_G_T  | 3126G>V | Substitution | Nonsynonymous coding | 40% |
| MM06T | HYDIN    | HYDIN, axonemal central pair apparatus protein                          | CCDS42189.1     | chr16_70900066-70900069_ACTC_ | NA      | Deletion     | Splice site donor    | 20% |
| MM06T | KCNJ12   | potassium inwardly-rectifying channel, subfamily J, member 12           | CCDS11219.1     | chr17_21319651-21319653_GAG_  | NA      | Deletion     | In-frame deletion    | 14% |
| MM06T | KIAA0195 | uncharacterized protein                                                 | CCDS32732.1     | chr17_73485372-73485372_C_T   | 264R>X  | Substitution | Nonsense             | 16% |



|       |          |                                                                  |                 |                               |         |              |                      |     |
|-------|----------|------------------------------------------------------------------|-----------------|-------------------------------|---------|--------------|----------------------|-----|
| MM06T | LAX1     | lymphocyte transmembrane adaptor 1                               | CCDS1441.2      | chr1_203743084-203743084_G_A  | 158A>T  | Substitution | Nonsynonymous coding | 19% |
| MM06T | LRRC7    | leucine rich repeat containing 7                                 | CCDS645.1       | chr1_70504419-70504419_C_     | NA      | Deletion     | Frameshift           | 26% |
| MM06T | LRRTM2   | leucine rich repeat transmembrane neuronal 2                     | CCDS47272.1     | chr5_138209522-138209522_T_C  | 243N>S  | Substitution | Nonsynonymous coding | 11% |
| MM06T | MEP1B    | meprin A, beta                                                   | CCDS45846.1     | chr18_29797032-29797032_G_A   | 613C>Y  | Substitution | Nonsynonymous coding | 28% |
| MM06T | NSD1     | nuclear receptor binding SET domain protein 1                    | CCDS4412.1      | chr5_176562442-176562442_G_T  | 113C>F  | Substitution | Nonsynonymous coding | 27% |
| MM06T | OGFRL1   | opioid growth factor receptor-like 1                             | CCDS34482.1     | chr6_72006438-72006438_T      | NA      | Insertion    | Frameshift           | 18% |
| MM06T | PPP1R13L | protein phosphatase 1, regulatory subunit 13 like                | CCDS33050.1     | chr19_45899997-45899997_G_A   | 173T>M  | Substitution | Nonsynonymous coding | 13% |
| MM06T | RING1    | ring finger protein 1                                            | CCDS34424.1     | chr6_33179576-33179576_G_C    | 306E>Q  | Substitution | Nonsynonymous coding | 13% |
| MM06T | RPP25    | ribonuclease P/MRP 25kDa subunit                                 | CCDS10274.1     | chr15_75248695-75248695_G_C   | 77T>S   | Substitution | Nonsynonymous coding | 29% |
| MM06T | SETD1A   | SET domain containing 1A                                         | CCDS32435.1     | chr16_30972664-30972664_C_A   | 108T>N  | Substitution | Nonsynonymous coding | 10% |
| MM06T | SLC51A   | solute carrier family 51, alpha subunit                          | CCDS3314.1      | chr3_195955038-195955038_G    | NA      | Insertion    | Frameshift           | 12% |
| MM06T | SPHK2    | sphingosine kinase 2                                             | CCDS12727.1     | chr19_49131521-49131521_A_G   | 287N>D  | Substitution | Nonsynonymous coding | 11% |
| MM06T | SPINT1   | serine peptidase inhibitor, Kunitz type 1                        | CCDS10067.1     | chr15_41136925-41136925_T_A   | 58V>E   | Substitution | Nonsynonymous coding | 21% |
| MM06T | UBAP2L   | ubiquitin associated protein 2-like                              | CCDS1063.1      | chr1_154227337-154227337_C_T  | 627T>M  | Substitution | Nonsynonymous coding | 10% |
| MM06T | ZNF521   | zinc finger protein 521                                          | CCDS32806.1     | chr18_22804538-22804538_C_T   | 1115R>K | Substitution | Nonsynonymous coding | 20% |
| MM08T | ANO2     | anoctamin 2                                                      | CCDS44807.1     | chr12_6030411-6030411_C_T     | 106R>H  | Substitution | Nonsynonymous coding | 25% |
| MM08T | ASXL3    | additional sex combs like 3 (Drosophila)                         | CCDS45847.1     | chr18_31324343-31324343_G_A   | 1511V>I | Substitution | Nonsynonymous coding | 29% |
| MM08T | CASKIN2  | CASK interacting protein 2                                       | CCDS11723.1     | chr17_73499255-73499255_C_T   | 634E>K  | Substitution | Nonsynonymous coding | 15% |
| MM08T | CCNT2    | cyclin T2                                                        | CCDS2174.1      | chr2_135677462-135677462_G_T  | NA      | Substitution | Splice site donor    | 40% |
| MM08T | CDC42BPB | CDC42 binding protein kinase beta (DMPK-like)                    | CCDS9978.1      | chr14_103430882-103430882_C_T | 895E>K  | Substitution | Nonsynonymous coding | 20% |
| MM08T | COPZ1    | coatamer protein complex, subunit zeta 1                         | CCDS8877.1      | chr12_54743423-54743423_C_T   | 156T>M  | Substitution | Nonsynonymous coding | 17% |
| MM08T | CYP2W1   | cytochrome P450, family 2, subfamily W, polypeptide 1            | CCDS5319.2      | chr7_1022905-1022905_G_A      | 20A>T   | Substitution | Nonsynonymous coding | 31% |
| MM08T | DCLRE1C  | DNA cross-link repair 1C                                         | CCDS31149.1     | chr10_14961793-14961793_G_C   | 367P>R  | Substitution | Nonsynonymous coding | 19% |
| MM08T | DHTKD1   | dehydrogenase E1 and transketolase domain containing 1           | CCDS7087.1      | chr10_12129595-12129595_C_A   | 195A>D  | Substitution | Nonsynonymous coding | 20% |
| MM08T | DOCK7    | dedicator of cytokinesis 7                                       | CCDS30734.1     | chr1_62970446-62970446_T_A    | 1509E>V | Substitution | Nonsynonymous coding | 18% |
| MM08T | DSEL     | dermatan sulfate epimerase-like                                  | CCDS11995.1     | chr18_65180719-65180719_G_T   | 386P>H  | Substitution | Nonsynonymous coding | 37% |
| MM08T | FAM167B  | family with sequence similarity 167, member B                    | CCDS358.2       | chr1_32714006-32714006_G_C    | 99G>A   | Substitution | Nonsynonymous coding | 67% |
| MM08T | ING4     | inhibitor of growth family, member 4                             | CCDS44813.1     | chr12_6761835-6761835_C_T     | 165V>M  | Substitution | Nonsynonymous coding | 18% |
| MM08T | ITPR1PL1 | inositol 1,4,5-trisphosphate receptor interacting protein-like 1 | CCDS33250.1     | chr2_96992429-96992429_G_A    | 28M>I   | Substitution | Nonsynonymous coding | 24% |
| MM08T | LACTBL1  | lactamase, beta-like 1                                           | ENST00000401081 | chr1_23285322-23285322_G_A    | 108R>W  | Substitution | Nonsynonymous coding | 27% |
| MM08T | LAMA3    | laminin, alpha 3                                                 | CCDS42419.1     | chr18_21396442-21396442_T_G   | 713V>G  | Substitution | Nonsynonymous coding | 32% |
| MM08T | LCE3A    | late cornified envelope 3A                                       | CCDS1017.1      | chr1_152595351-152595351_C_T  | 77G>R   | Substitution | Nonsynonymous coding | 26% |

|       |          |                                                                                  |             |                               |         |              |                      |     |
|-------|----------|----------------------------------------------------------------------------------|-------------|-------------------------------|---------|--------------|----------------------|-----|
| MM08T | MARK4    | MAP/microtubule affinity-regulating kinase 4                                     | CCDS12658.1 | chr19_45783851-45783851_G_A   | 379A>T  | Substitution | Nonsynonymous coding | 10% |
| MM08T | MUSK     | muscle, skeletal, receptor tyrosine kinase                                       | CCDS48005.1 | chr9_113549969-113549969_G_A  | NA      | Substitution | Splice site acceptor | 50% |
| MM08T | MVP      | major vault protein                                                              | CCDS10656.1 | chr16_29851667-29851667_C_T   | 360R>C  | Substitution | Nonsynonymous coding | 24% |
| MM08T | NID1     | nidogen 1                                                                        | CCDS1608.1  | chr1_236176788-236176788_T_C  | 776Q>R  | Substitution | Nonsynonymous coding | 27% |
| MM08T | PCDHA1   | protocadherin alpha 1                                                            | CCDS34246.1 | chr5_140166698-140166698_G_A  | 275G>S  | Substitution | Nonsynonymous coding | 25% |
| MM08T | PIK3R1   | phosphoinositide-3-kinase, regulatory subunit 1 (alpha)                          | CCDS3993.1  | chr5_67591116-67591116_TTA    | 570L>LI | Insertion    | In-frame insertion   | 27% |
| MM08T | PIK3R5   | phosphoinositide-3-kinase, regulatory subunit 5                                  | CCDS11147.1 | chr17_8791741-8791741_G_A     | 455R>W  | Substitution | Nonsynonymous coding | 60% |
| MM08T | PLEKHG3  | pleckstrin homology domain containing, family G; member 3                        | CCDS32098.1 | chr14_65207884-65207884_G_A   | 494G>D  | Substitution | Nonsynonymous coding | 21% |
| MM08T | PROX2    | prospero homeobox 2                                                              | CCDS45136.1 | chr14_75329616-75329616_G_A   | 308R>C  | Substitution | Nonsynonymous coding | 26% |
| MM08T | PTEN     | phosphatase and tensin homolog                                                   | NM_000314   | chr10_89624263-89624263_A_G   | 13K>E   | Substitution | Nonsynonymous coding | 30% |
| MM08T | PXDNL    | peroxidasin homolog (Drosophila)-like                                            | CCDS47855.1 | chr8_52336137-52336137_G_A    | 598T>M  | Substitution | Nonsynonymous coding | 25% |
| MM08T | SCNN1B   | sodium channel, non-voltage-gated 1, beta subunit                                | CCDS10609.1 | chr16_23364399-23364399_A_C   | NA      | Substitution | Splice site donor    | 26% |
| MM08T | SERPINB7 | serpin peptidase inhibitor, clade B (ovalbumin), member 7                        | CCDS11988.1 | chr18_61471670-61471670_G_A   | 315R>H  | Substitution | Nonsynonymous coding | 43% |
| MM08T | SORCS1   | sortilin-related VPS10 domain containing receptor 1                              | CCDS31283.1 | chr10_108924224-108924224_C_T | 21A>T   | Substitution | Nonsynonymous coding | 30% |
| MM08T | TP53     | tumor protein p53                                                                | CCDS11118.1 | chr17_7578212-7578212_G_A     | 213R>X  | Substitution | Nonsense             | 56% |
| MM08T | UBA7     | ubiquitin-like modifier activating enzyme 7                                      | CCDS2805.1  | chr3_49846592-49846592_C_A    | 722D>Y  | Substitution | Nonsynonymous coding | 33% |
| MM08T | UNKL     | unkempt homolog (Drosophila)-like                                                | CCDS32359.1 | chr16_1453320-1453320_C_T     | 105G>R  | Substitution | Nonsynonymous coding | 22% |
| MM08T | WDR67    | WD repeat domain 67                                                              | CCDS6338.1  | chr8_124138303-124138303_G_A  | 526W>X  | Substitution | Nonsense             | 47% |
| MM08T | ZC4H2    | zinc finger, C4H2 domain containing                                              | CCDS14380.1 | chrX_64141723-64141723_G_A    | 67R>X   | Substitution | Nonsense             | 12% |
| MM08T | ZFP28    | ZFP28 zinc finger protein                                                        | CCDS12946.1 | chr19_57061469-57061469_T_A   | 241F>I  | Substitution | Nonsynonymous coding | 22% |
| MM09T | AOC2     | amine oxidase, copper containing 2 (retina-specific)                             | CCDS11443.1 | chr17_40997271-40997271_C_T   | 210R>W  | Substitution | Nonsynonymous coding | 21% |
| MM09T | APOB     | apolipoprotein B (including Ag(x) antigen)                                       | CCDS1703.1  | chr2_21237353-21237353_T_C    | 1270D>G | Substitution | Nonsynonymous coding | 21% |
| MM09T | ASAP3    | ArfGAP with SH3 domain, ankyrin repeat and PH domain 3                           | CCDS235.1   | chr1_23763782-23763782_C_T    | 395E>K  | Substitution | Nonsynonymous coding | 19% |
| MM09T | BRD9     | bromodomain containing 9                                                         | CCDS34127.1 | chr5_878576-878576_C_T        | 293A>T  | Substitution | Nonsynonymous coding | 16% |
| MM09T | C6       | complement component 6                                                           | CCDS3936.1  | chr5_41154097-41154097_G_A    | 702T>M  | Substitution | Nonsynonymous coding | 23% |
| MM09T | CAD      | carbamoyl-phosphate synthetase 2, aspartate transcarbamylase, and dihydroorotase | CCDS1742.1  | chr2_27440438-27440438_G_C    | 7E>Q    | Substitution | Nonsynonymous coding | 27% |
| MM09T | CFH      | complement factor H                                                              | CCDS1385.1  | chr1_196696029-196696029_C_T  | 732T>M  | Substitution | Nonsynonymous coding | 14% |
| MM09T | DOK2     | docking protein 2, 56kDa                                                         | CCDS6016.1  | chr8_21767240-21767240_G_C    | 274P>R  | Substitution | Nonsynonymous coding | 28% |
| MM09T | ERAP2    | endoplasmic reticulum aminopeptidase 2                                           | CCDS4086.1  | chr5_96228110-96228110_G_A    | 360D>N  | Substitution | Nonsynonymous coding | 19% |
| MM09T | ERBB3    | v-erb-b2 erythroblastic leukemia viral oncogene homolog 3 (avian)                | CCDS31833.1 | chr12_56478854-56478854_G_A   | 104V>M  | Substitution | Nonsynonymous coding | 44% |
| MM09T | FANCD2   | Fanconi anemia, complementation group D2                                         | CCDS2595.1  | chr3_10088343-10088343_A_G    | 405N>S  | Substitution | Nonsynonymous coding | 26% |
| MM09T | KCNJ14   | potassium inwardly-rectifying channel, subfamily J, member 14                    | CCDS12721.1 | chr19_48967528-48967528_G_A   | 269V>M  | Substitution | Nonsynonymous coding | 22% |

|       |         |                                                                         |              |                              |         |              |                      |     |
|-------|---------|-------------------------------------------------------------------------|--------------|------------------------------|---------|--------------|----------------------|-----|
| MM09T | KLHL36  | kelch-like 36 (Drosophila)                                              | CCDS10948.1  | chr16_84695417-84695417_G_A  | 510R>H  | Substitution | Nonsynonymous coding | 21% |
| MM09T | KRAS    | v-Ki-ras2 Kirsten rat sarcoma viral oncogene homolog                    | CCDS8703.1   | chr12_25398284-25398284_C_A  | 12G>V   | Substitution | Nonsynonymous coding | 52% |
| MM09T | LIG3    | ligase III, DNA, ATP-dependent                                          | CCDS11284.2  | chr17_33310077-33310077_G_A  | 18R>Q   | Substitution | Nonsynonymous coding | 20% |
| MM09T | LYZL2   | lysozyme-like 2                                                         | CCDS7167.2   | chr10_30918597-30918597_T_C  | 13K>R   | Substitution | Nonsynonymous coding | 13% |
| MM09T | MBD1    | methyl-CpG binding domain protein 1                                     | CCDS11943.1  | chr18_47803109-47803109_C_T  | 133C>Y  | Substitution | Nonsynonymous coding | 19% |
| MM09T | NEIL1   | nei endonuclease VIII-like 1 (E. coli)                                  | CCDS10278.1  | chr15_75646604-75646604_C_T  | 287P>L  | Substitution | Nonsynonymous coding | 30% |
| MM09T | NLRP5   | NLR family, pyrin domain containing 5                                   | CCDS12938.1  | chr19_56520199-56520199_C_A  | 163P>Q  | Substitution | Nonsynonymous coding | 15% |
| MM09T | PIK3CA  | phosphatidylinositol-4,5-bisphosphate 3-kinase, catalytic subunit alpha | CCDS43171.1  | chr3_178952085-178952085_A_G | 1047H>R | Substitution | Nonsynonymous coding | 39% |
| MM09T | PLCE1   | phospholipase C, epsilon 1                                              | CCDS41552.1  | chr10_96028768-96028768_C_T  | 1455T>M | Substitution | Nonsynonymous coding | 16% |
| MM09T | PPP1R9A | protein phosphatase 1, regulatory subunit 9A                            | NM_001166160 | chr7_94833011-94833011_A_G   | 642N>S  | Substitution | Nonsynonymous coding | 13% |
| MM09T | PRRT4   | proline-rich transmembrane protein 4                                    | CCDS47698.1  | chr7_127991680-127991680_G_A | 644H>Y  | Substitution | Nonsynonymous coding | 13% |
| MM09T | PXDNL   | peroxidasin homolog (Drosophila)-like                                   | CCDS47855.1  | chr8_52412283-52412283_C_T   | 143G>E  | Substitution | Nonsynonymous coding | 19% |
| MM09T | RBL1    | retinoblastoma-like 1 (p107)                                            | CCDS13289.1  | chr20_35651201-35651201_C_T  | 804R>H  | Substitution | Nonsynonymous coding | 15% |
| MM09T | RNF112  | ring finger protein 112                                                 | NM_007148    | chr17_19318369-19318369_G_A  | 382R>H  | Substitution | Nonsynonymous coding | 18% |
| MM09T | RNF123  | ring finger protein 123                                                 | CCDS33758.1  | chr3_49758068-49758068_C_T   | 1209R>C | Substitution | Nonsynonymous coding | 16% |
| MM09T | RXFP1   | relaxin/insulin-like family peptide receptor 1                          | CCDS43276.1  | chr4_159566061-159566061_A_G | 372I>M  | Substitution | Nonsynonymous coding | 21% |
| MM09T | SHE     | Src homology 2 domain containing E                                      | CCDS30877.1  | chr1_154456625-154456625_T_G | 496*>Y  | Substitution | Nonsynonymous coding | 14% |
| MM09T | SIGLEC1 | sialic acid binding Ig-like lectin 1, sialoadhesin                      | CCDS13060.1  | chr20_3672185-3672185_A_G    | 1465C>R | Substitution | Nonsynonymous coding | 13% |
| MM09T | SLC38A5 | solute carrier family 38, member 5                                      | CCDS14293.1  | chrX_48319088-48319088_G_A   | 339R>C  | Substitution | Nonsynonymous coding | 18% |
| MM09T | SPOP    | speckle-type POZ protein                                                | CCDS11551.1  | chr17_47696716-47696716_C_T  | 78E>K   | Substitution | Nonsynonymous coding | 22% |
| MM09T | TIMM21  | translocase of inner mitochondrial membrane 21 homolog (yeast)          | CCDS12003.1  | chr18_71816122-71816122_T_G  | 27Y>D   | Substitution | Nonsynonymous coding | 18% |
| MM09T | TRAM1L1 | translocation associated membrane protein 1-like 1                      | CCDS3707.1   | chr4_118006500-118006500_T_A | 17E>V   | Substitution | Nonsynonymous coding | 14% |
| MM09T | UBAC1   | UBA domain containing 1                                                 | CCDS35177.1  | chr9_138839666-138839666_G_A | 140A>V  | Substitution | Nonsynonymous coding | 12% |
| MM09T | VAR5    | valyl-tRNA synthetase                                                   | CCDS34412.1  | chr6_31760236-31760236_T_C   | 240K>R  | Substitution | Nonsynonymous coding | 15% |
| MM09T | ZNF800  | zinc finger protein 800                                                 | CCDS5795.1   | chr7_127017355-127017355_T_A | 62L>F   | Substitution | Nonsynonymous coding | 16% |
| MM10T | MARCH8  | membrane-associated ring finger (C3HC4) 8, E3 ubiquitin protein ligase  | CCDS7213.1   | chr10_45953829-45953829_C_T  | 245S>N  | Substitution | Nonsynonymous coding | 83% |
| MM10T | A2M     | alpha-2-macroglobulin                                                   | CCDS44827.1  | chr12_9248167-9248167_T_C    | 661T>A  | Substitution | Nonsynonymous coding | 13% |
| MM10T | AKAP6   | A kinase (PRKA) anchor protein 6                                        | CCDS9644.1   | chr14_33292146-33292146_C_A  | 1709N>K | Substitution | Nonsynonymous coding | 17% |
| MM10T | ARID1A  | AT rich interactive domain 1A (SWI-like)                                | CCDS285.1    | chr1_27094424-27094424_G_    | NA      | Deletion     | Frameshift           | 68% |
| MM10T | ARMC4   | armadillo repeat containing 4                                           | CCDS7157.1   | chr10_28229688-28229688_G_A  | 597S>L  | Substitution | Nonsynonymous coding | 12% |
| MM10T | ARPC1B  | actin related protein 2/3 complex, subunit 1B, 41kDa                    | CCDS5661.1   | chr7_98988655-98988655_G_A   | 214G>R  | Substitution | Nonsynonymous coding | 16% |
| MM10T | ASTN2   | astrotactin 2                                                           | CCDS48009.1  | chr9_119976961-119976961_G_A | 231R>X  | Substitution | Nonsense             | 61% |

|       |               |                                                                               |                 |                               |         |              |                      |     |
|-------|---------------|-------------------------------------------------------------------------------|-----------------|-------------------------------|---------|--------------|----------------------|-----|
| MM10T | ATP6V1A       | ATPase, H+ transporting, lysosomal 70kDa, V1 subunit A                        | CCDS2976.1      | chr3_113507661-113507661_T_C  | 273I>T  | Substitution | Nonsynonymous coding | 20% |
| MM10T | B4GALNT3      | beta-1,4-N-acetyl-galactosaminyl transferase 3                                | CCDS8504.1      | chr12_645453-645453_C_G       | 115L>V  | Substitution | Nonsynonymous coding | 18% |
| MM10T | CCKAR         | cholecystokinin A receptor                                                    | CCDS3438.1      | chr4_26484867-26484867_C_T    | 222G>E  | Substitution | Nonsynonymous coding | 23% |
| MM10T | CD22          | CD22 molecule                                                                 | CCDS12457.1     | chr19_35832462-35832462_A_G   | 575N>S  | Substitution | Nonsynonymous coding | 18% |
| MM10T | CDH8          | cadherin 8, type 2                                                            | CCDS10802.1     | chr16_61851408-61851408_G_T   | 418P>T  | Substitution | Nonsynonymous coding | 27% |
| MM10T | CELSR1        | cadherin, EGF LAG seven-pass G-type receptor 1 (flamingo homolog, Drosophila) | CCDS14076.1     | chr22_46931003-46931003_G_A   | 689Q>X  | Substitution | Nonsense             | 28% |
| MM10T | CENPE         | centromere protein E, 312kDa                                                  | CCDS34042.1     | chr4_104030043-104030043_C_A  | 2643C>F | Substitution | Nonsynonymous coding | 17% |
| MM10T | CHD1          | chromodomain helicase DNA binding protein 1                                   | CCDS34204.1     | chr5_98223925-98223925_C_A    | 788G>V  | Substitution | Nonsynonymous coding | 24% |
| MM10T | CLIC5         | chloride intracellular channel 5                                              | CCDS47438.1     | chr6_45870960-45870960_G_C    | 366I>M  | Substitution | Nonsynonymous coding | 34% |
| MM10T | COL4A3        | collagen, type IV, alpha 3 (Goodpasture antigen)                              | CCDS42829.1     | chr2_228172428-228172428_C_T  | 1419P>S | Substitution | Nonsynonymous coding | 14% |
| MM10T | CTD-3064H18.4 | uncharacterized protein                                                       | ENST00000316807 | chr19_38039944-38039944_G_A   | 20L>F   | Substitution | Nonsynonymous coding | 13% |
| MM10T | DEK           | DEK oncogene                                                                  | CCDS34344.1     | chr6_18249962-18249962_C_G    | 228D>H  | Substitution | Nonsynonymous coding | 18% |
| MM10T | DOPEY1        | dopey family member 1                                                         | CCDS4996.1      | chr6_83847881-83847881_C_T    | 1374Q>X | Substitution | Nonsense             | 12% |
| MM10T | DUOXA1        | dual oxidase maturation factor 1                                              | CCDS10119.1     | chr15_45410147-45410147_C_T   | 371R>Q  | Substitution | Nonsynonymous coding | 28% |
| MM10T | EFR3B         | EFR3 homolog B (S. cerevisiae)                                                | CCDS46231.1     | chr2_25353467-25353467_C_A    | 273R>S  | Substitution | Nonsynonymous coding | 32% |
| MM10T | ELSPBP1       | epididymal sperm binding protein 1                                            | CCDS12708.1     | chr19_48519260-48519260_G_A   | 107D>N  | Substitution | Nonsynonymous coding | 56% |
| MM10T | EMC4          | ER membrane protein complex subunit 4                                         | CCDS10035.1     | chr15_34520687-34520687_T_C   | 138I>T  | Substitution | Nonsynonymous coding | 20% |
| MM10T | FAM214B       | family with sequence similarity 214, member B                                 | CCDS6578.1      | chr9_35107475-35107475_C_T    | 266R>Q  | Substitution | Nonsynonymous coding | 29% |
| MM10T | FN3KRP        | fructosamine 3 kinase related protein                                         | CCDS11817.1     | chr17_80684712-80684712_A_C   | 199K>Q  | Substitution | Nonsynonymous coding | 17% |
| MM10T | FREM1         | FRAS1 related extracellular matrix 1                                          | CCDS47952.1     | chr9_14775989-14775989_T_C    | 1552H>R | Substitution | Nonsynonymous coding | 47% |
| MM10T | GCOM1         | GRINL1A complex locus 1                                                       | CCDS32247.1     | chr15_57925820-57925820_A_G   | 272N>D  | Substitution | Nonsynonymous coding | 12% |
| MM10T | GOLGA3        | golgin A3                                                                     | CCDS9281.1      | chr12_133373163-133373163_C_G | 688A>P  | Substitution | Nonsynonymous coding | 25% |
| MM10T | GRIN2D        | glutamate receptor, ionotropic, N-methyl D-aspartate 2D                       | CCDS12719.1     | chr19_48925066-48925066_C_A   | 706P>T  | Substitution | Nonsynonymous coding | 15% |
| MM10T | GRM8          | glutamate receptor, metabotropic 8                                            | CCDS47696.1     | chr7_126173250-126173250_C_T  | 729R>Q  | Substitution | Nonsynonymous coding | 20% |
| MM10T | HDAC2         | histone deacetylase 2                                                         | CCDS43493.1     | chr6_114292207-114292207_C_A  | 50A>S   | Substitution | Nonsynonymous coding | 13% |
| MM10T | HNRNPA2B1     | heterogeneous nuclear ribonucleoprotein A2/B1                                 | CCDS43557.1     | chr7_26237273-26237273_T_C    | 41Y>C   | Substitution | Nonsynonymous coding | 32% |
| MM10T | ICAM5         | intercellular adhesion molecule 5, telencephalin                              | CCDS12233.1     | chr19_10404578-10404578_C_T   | 557P>L  | Substitution | Nonsynonymous coding | 13% |
| MM10T | IK            | IK cytokine, down-regulator of HLA II                                         | CCDS47280.1     | chr5_140037169-140037169_G_T  | 278V>F  | Substitution | Nonsynonymous coding | 17% |
| MM10T | IRS1          | insulin receptor substrate 1                                                  | CCDS2463.1      | chr2_227662199-227662199_G_A  | 419S>F  | Substitution | Nonsynonymous coding | 20% |
| MM10T | ITGB4         | integrin, beta 4                                                              | CCDS11727.1     | chr17_73732406-73732406_G_A   | 600R>H  | Substitution | Nonsynonymous coding | 21% |
| MM10T | KANK1         | KN motif and ankyrin repeat domains 1                                         | CCDS34976.1     | chr9_711409-711409_G_A        | 215G>R  | Substitution | Nonsynonymous coding | 30% |
| MM10T | KIAA1324L     | uncharacterized protein                                                       | CCDS47632.1     | chr7_86509836-86509838_TCT_   | NA      | Deletion     | In-frame deletion    | 13% |

|       |          |                                                                                                                        |                 |                               |         |              |                      |     |
|-------|----------|------------------------------------------------------------------------------------------------------------------------|-----------------|-------------------------------|---------|--------------|----------------------|-----|
| MM10T | KIF15    | kinesin family member 15                                                                                               | CCDS33744.1     | chr3_44893430-44893430_G_C    | 1320E>Q | Substitution | Nonsynonymous coding | 34% |
| MM10T | LPIN1    | lipin 1                                                                                                                | CCDS1682.1      | chr2_11935605-11935605_G_T    | 590L>F  | Substitution | Nonsynonymous coding | 37% |
| MM10T | MAGEE1   | melanoma antigen family E, 1                                                                                           | CCDS14433.1     | chrX_75649080-75649080_G_A    | 253D>N  | Substitution | Nonsynonymous coding | 38% |
| MM10T | MAMLD1   | mastermind-like domain containing 1                                                                                    | CCDS14693.2     | chrX_149613877-149613877_C_T  | 32S>L   | Substitution | Nonsynonymous coding | 25% |
| MM10T | MAN1A1   | mannosidase, alpha, class 1A, member 1                                                                                 | CCDS5122.1      | chr6_119509710-119509710_C_T  | 527D>N  | Substitution | Nonsynonymous coding | 26% |
| MM10T | MASP1    | mannan-binding lectin serine peptidase 1 (C4/C2 activating component of Ra-reactive minichromosome maintenance complex | CCDS33907.1     | chr3_186938886-186938886_T_A  | 616K>X  | Substitution | Nonsense             | 11% |
| MM10T | MCMBP    | binding protein                                                                                                        | CCDS7617.1      | chr10_121602814-121602814_T_G | 318I>L  | Substitution | Nonsynonymous coding | 23% |
| MM10T | MTMR8    | myotubularin related protein 8                                                                                         | CCDS14379.1     | chrX_63488736-63488736_T_C    | 599D>G  | Substitution | Nonsynonymous coding | 39% |
| MM10T | N4BP1    | NEDD4 binding protein 1                                                                                                | CCDS45479.1     | chr16_48595127-48595127__C    | NA      | Insertion    | Frameshift           | 21% |
| MM10T | NASP     | nuclear autoantigenic sperm protein (histone-binding)                                                                  | CCDS526.1       | chr1_46073604-46073604_G_A    | 343A>T  | Substitution | Nonsynonymous coding | 17% |
| MM10T | NTRK2    | neurotrophic tyrosine kinase, receptor, type 2                                                                         | CCDS6671.1      | chr9_87285764-87285764_C_T    | 34T>M   | Substitution | Nonsynonymous coding | 28% |
| MM10T | PCDHGA7  | protocadherin gamma subfamily A, 7                                                                                     | NM_018920       | chr5_140764319-140764319_C_T  | 618A>V  | Substitution | Nonsynonymous coding | 18% |
| MM10T | PIK3R2   | phosphoinositide-3-kinase, regulatory subunit 2 (beta)                                                                 | CCDS12371.1     | chr19_18273884-18273884_G_A   | 406R>H  | Substitution | Nonsynonymous coding | 18% |
| MM10T | PLK1     | polo-like kinase 1                                                                                                     | CCDS10616.1     | chr16_23691564-23691564_G_A   | 190V>M  | Substitution | Nonsynonymous coding | 22% |
| MM10T | RASL12   | RAS-like, family 12                                                                                                    | CCDS10200.1     | chr15_65347311-65347311_C_T   | 243V>M  | Substitution | Nonsynonymous coding | 24% |
| MM10T | RB1      | retinoblastoma 1                                                                                                       | CCDS31973.1     | chr13_49039213-49039213_T_A   | 764L>Q  | Substitution | Nonsynonymous coding | 24% |
| MM10T | RBM4B    | RNA binding motif protein 4B                                                                                           | CCDS8149.1      | chr11_66436178-66436178_C_A   | 333A>S  | Substitution | Nonsynonymous coding | 23% |
| MM10T | RIPPLY2  | ripply2 homolog (zebrafish)                                                                                            | CCDS34493.1     | chr6_84563182-84563182_C_T    | 16A>V   | Substitution | Nonsynonymous coding | 14% |
| MM10T | SAMD15   | sterile alpha motif domain containing 15                                                                               | CCDS32126.1     | chr14_77844219-77844219_C_A   | 153S>X  | Substitution | Nonsense             | 18% |
| MM10T | SDK2     | sidekick cell adhesion molecule 2                                                                                      | CCDS45769.1     | chr17_71420083-71420083_C_T   | 578D>N  | Substitution | Nonsynonymous coding | 38% |
| MM10T | SH3RF3   | SH3 domain containing ring finger 3                                                                                    | NM_001099289    | chr2_109746153-109746153_G_T  | 53D>Y   | Substitution | Nonsynonymous coding | 13% |
| MM10T | SLC25A13 | solute carrier family 25 (aspartate/glutamate carrier), member 13                                                      | CCDS5645.1      | chr7_95775937-95775937_T_A    | 461E>D  | Substitution | Nonsynonymous coding | 19% |
| MM10T | SNHG14   | small nucleolar RNA host gene 14 (non-protein coding)                                                                  | ENST00000383025 | chr15_25328597-25328597_C_T   | 80A>V   | Substitution | Nonsynonymous coding | 47% |
| MM10T | SPHKAP   | SPHK1 interactor, AKAP domain containing                                                                               | CCDS46537.1     | chr2_228881796-228881796_G_T  | 1258N>K | Substitution | Nonsynonymous coding | 17% |
| MM10T | SPTBN5   | spectrin, beta, non-erythrocytic 5                                                                                     | NM_016642       | chr15_42173303-42173303_C_A   | 828D>Y  | Substitution | Nonsynonymous coding | 40% |
| MM10T | SUPT6H   | suppressor of Ty 6 homolog (S. cerevisiae)                                                                             | CCDS32596.1     | chr17_27002000-27002000_C_T   | 120R>C  | Substitution | Nonsynonymous coding | 14% |
| MM10T | SYNE1    | spectrin repeat containing, nuclear envelope 1                                                                         | CCDS5236.1      | chr6_152631535-152631535_C_G  | 5672R>P | Substitution | Nonsynonymous coding | 13% |
| MM10T | TM9SF1   | transmembrane 9 superfamily member 1                                                                                   | CCDS9617.1      | chr14_24664158-24664158_C_    | NA      | Deletion     | Frameshift           | 23% |
| MM10T | TMLHE    | trimethyllysine hydroxylase, epsilon                                                                                   | CCDS14768.1     | chrX_154741409-154741409_G_A  | 228S>F  | Substitution | Nonsynonymous coding | 17% |
| MM10T | TMPRSS9  | transmembrane protease, serine 9                                                                                       | CCDS12088.1     | chr19_2415703-2415703_C_T     | 503R>W  | Substitution | Nonsynonymous coding | 12% |
| MM10T | TP53     | tumor protein p53                                                                                                      | CCDS11118.1     | chr17_7577566-7577566_T_C     | 239N>D  | Substitution | Nonsynonymous coding | 89% |
| MM10T | TRHDE    | thyrotropin-releasing hormone degrading enzyme                                                                         | CCDS9004.1      | chr12_72936078-72936078_C_A   | 532A>D  | Substitution | Nonsynonymous coding | 22% |

|       |          |                                                                               |                 |                               |          |              |                      |     |
|-------|----------|-------------------------------------------------------------------------------|-----------------|-------------------------------|----------|--------------|----------------------|-----|
| MM10T | TRMT11   | tRNA methyltransferase 11 homolog (S. cerevisiae)                             | CCDS35496.1     | chr6_126314956-126314956_A_T  | 42E>D    | Substitution | Nonsynonymous coding | 11% |
| MM10T | TRPV4    | transient receptor potential cation channel, subfamily V, member 4            | CCDS9134.1      | chr12_110224623-110224623_T_C | 743D>G   | Substitution | Nonsynonymous coding | 68% |
| MM10T | TTN      | titin                                                                         | ENST00000356127 | chr2_179516471-179516471_C_A  | 10695V>L | Substitution | Nonsynonymous coding | 15% |
| MM10T | TUFT1    | tuftelin 1                                                                    | CCDS1000.1      | chr1_151551303-151551303_G_T  | _1SV+1>  | Substitution | Splice site donor    | 10% |
| MM10T | VGLL3    | vestigial like 3 (Drosophila)                                                 | CCDS43110.1     | chr3_87018204-87018204_G_T    | 158P>Q   | Substitution | Nonsynonymous coding | 11% |
| MM10T | WDFY4    | WDFY family member 4                                                          | CCDS44385.1     | chr10_50151420-50151420_G_A   | 2559A>T  | Substitution | Nonsynonymous coding | 35% |
| MM10T | ZNF451   | zinc finger protein 451                                                       | ENST00000370711 | chr6_56963946-56963946_A_G    | 65T>A    | Substitution | Nonsynonymous coding | 21% |
| MM10T | ZNF648   | zinc finger protein 648                                                       | CCDS30952.1     | chr1_182025929-182025929_C_T  | 406R>H   | Substitution | Nonsynonymous coding | 16% |
| MM11T | ACTL6B   | actin-like 6B                                                                 | CCDS5702.1      | chr7_100252740-100252740_C_T  | 91E>K    | Substitution | Nonsynonymous coding | 19% |
| MM11T | BAZ1A    | bromodomain adjacent to zinc finger domain, 1A                                | CCDS9651.1      | chr14_35231425-35231425_G_A   | 1261P>S  | Substitution | Nonsynonymous coding | 13% |
| MM11T | BEST3    | bestrophin 3                                                                  | CCDS8992.2      | chr12_70070852-70070852_G_A   | NA       | Substitution | Splice site acceptor | 18% |
| MM11T | C14orf93 | chromosome 14 open reading frame 93                                           | CCDS9583.1      | chr14_23465326-23465326_C_T   | 250R>H   | Substitution | Nonsynonymous coding | 23% |
| MM11T | CCDC146  | coiled-coil domain containing 146                                             | CCDS34671.1     | chr7_76916813-76916813_T_A    | 778Y>X   | Substitution | Nonsense             | 13% |
| MM11T | COL5A3   | collagen, type V, alpha 3                                                     | CCDS12222.1     | chr19_10081321-10081321_C_T   | 1305A>T  | Substitution | Nonsynonymous coding | 31% |
| MM11T | CTNNB1   | catenin (cadherin-associated protein), beta 1, 88kDa                          | CCDS2694.1      | chr3_41266101-41266101_C_G    | 33S>C    | Substitution | Nonsynonymous coding | 35% |
| MM11T | DPF2     | D4, zinc and double PHD fingers family 2                                      | CCDS8100.1      | chr11_65107954-65107954_C_T   | 44S>L    | Substitution | Nonsynonymous coding | 13% |
| MM11T | DRD4     | dopamine receptor D4                                                          | CCDS7710.1      | chr11_640535-640535_G_        | NA       | Deletion     | Frameshift           | 21% |
| MM11T | E2F7     | E2F transcription factor 7                                                    | CCDS9016.1      | chr12_77423772-77423772_C_T   | 575D>N   | Substitution | Nonsynonymous coding | 30% |
| MM11T | ESR1     | estrogen receptor 1                                                           | CCDS5234.1      | chr6_152419923-152419923_A_C  | 537Y>S   | Substitution | Nonsynonymous coding | 32% |
| MM11T | FAM133A  | family with sequence similarity 133, member A                                 | CCDS14466.1     | chrX_92964582-92964582_C_A    | 55S>X    | Substitution | Nonsense             | 17% |
| MM11T | FARSA    | phenylalanyl-tRNA synthetase, alpha subunit                                   | CCDS12287.1     | chr19_13041256-13041256_C_T   | 124R>Q   | Substitution | Nonsynonymous coding | 13% |
| MM11T | FAT1     | FAT tumor suppressor homolog 1 (Drosophila)                                   | CCDS47177.1     | chr4_187541847-187541847_C_T  | 1965V>I  | Substitution | Nonsynonymous coding | 12% |
| MM11T | FREM2    | FRAS1 related extracellular matrix protein 2                                  | CCDS31960.1     | chr13_39452996-39452996_C_T   | 2963T>I  | Substitution | Nonsynonymous coding | 15% |
| MM11T | GPR162   | G-protein coupled receptor 162                                                | CCDS8563.1      | chr12_6933731-6933731_G_T     | 223G>W   | Substitution | Nonsynonymous coding | 31% |
| MM11T | HUWE1    | HECT, UBA and WWE domain containing 1, E3 ubiquitin protein ligase            | CCDS35301.1     | chrX_53564560-53564560_G_A    | 4032R>C  | Substitution | Nonsynonymous coding | 24% |
| MM11T | MARVELD2 | MARVEL domain containing 2                                                    | CCDS34175.1     | chr5_68715276-68715276_C_T    | 22P>S    | Substitution | Nonsynonymous coding | 31% |
| MM11T | NLRP6    | NLR family, pyrin domain containing 6                                         | CCDS7693.1      | chr11_281571-281571_G_A       | 613E>K   | Substitution | Nonsynonymous coding | 44% |
| MM11T | PARP10   | poly (ADP-ribose) polymerase family, member 10 [Source:HGNC Symbol;Acc:25895] | CCDS34960.1     | chr8_145051803-145051803_T_G  | 976D>A   | Substitution | Nonsynonymous coding | 19% |
| MM11T | PLXNA3   | plexin A3                                                                     | CCDS14752.1     | chrX_153699557-153699557_A_G  | 1756M>V  | Substitution | Nonsynonymous coding | 23% |
| MM11T | PRDM10   | PR domain containing 10                                                       | CCDS44771.1     | chr11_129802076-129802076_C_T | 403R>Q   | Substitution | Nonsynonymous coding | 19% |
| MM11T | PRKCB    | protein kinase C, beta                                                        | CCDS10619.1     | chr16_24202490-24202490_G_A   | 601R>Q   | Substitution | Nonsynonymous coding | 11% |
| MM11T | PXDNL    | peroxidasin homolog (Drosophila)-like                                         | CCDS47855.1     | chr8_52321257-52321257_C_T    | 976R>Q   | Substitution | Nonsynonymous coding | 17% |

|       |          |                                                                        |                 |                              |         |              |                      |     |
|-------|----------|------------------------------------------------------------------------|-----------------|------------------------------|---------|--------------|----------------------|-----|
| MM11T | RNASEH2B | ribonuclease H2, subunit B                                             | CCDS9425.1      | chr13_51528056-51528056_G_A  | 253D>N  | Substitution | Nonsynonymous coding | 11% |
| MM11T | SLC39A6  | solute carrier family 39 (zinc transporter), member 6                  | CCDS42428.1     | chr18_33691209-33691209_T_A  | 643D>V  | Substitution | Nonsynonymous coding | 38% |
| MM11T | SPAG17   | sperm associated antigen 17                                            | CCDS899.1       | chr1_118514636-118514636_G_A | 2059S>F | Substitution | Nonsynonymous coding | 17% |
| MM11T | SPEF2    | sperm flagellar 2                                                      | ENST00000303129 | chr5_35789448-35789448_G_A   | 97M>I   | Substitution | Nonsynonymous coding | 13% |
| MM11T | SSPO     | SCO-spondin homolog (Bos taurus)                                       | ENST00000262089 | chr7_149492787-149492787_G_T | 1233Q>H | Substitution | Nonsynonymous coding | 25% |
| MM11T | TBL3     | transducin (beta)-like 3                                               | CCDS10453.1     | chr16_2024784-2024784_C_T    | 134R>C  | Substitution | Nonsynonymous coding | 19% |
| MM11T | TUBD1    | tubulin, delta 1                                                       | CCDS11620.1     | chr17_57944063-57944063_T_A  | 328S>C  | Substitution | Nonsynonymous coding | 11% |
| MM12T | MARCH7   | membrane-associated ring finger (C3HC4) 7, E3 ubiquitin protein ligase | CCDS2210.1      | chr2_160602422-160602422_G_A | 163R>Q  | Substitution | Nonsynonymous coding | 21% |
| MM12T | SEPT1    | septin 1                                                               | CCDS10678.1     | chr16_30393191-30393191_C_A  | 65Q>H   | Substitution | Nonsynonymous coding | 41% |
| MM12T | SEPT3    | septin 3                                                               | CCDS14026.2     | chr22_42390641-42390641_C_A  | 312L>I  | Substitution | Nonsynonymous coding | 52% |
| MM12T | SEPT6    | septin 6                                                               | CCDS14584.1     | chrX_118827061-118827061_G_A | 3A>V    | Substitution | Nonsynonymous coding | 15% |
| MM12T | SEPT7    | septin 7                                                               | NM_001011553    | chr7_35872496-35872496_C_T   | 51T>M   | Substitution | Nonsynonymous coding | 24% |
| MM12T | SEPT8    | septin 8                                                               | CCDS43358.1     | chr5_132096610-132096610_T_G | 390E>D  | Substitution | Nonsynonymous coding | 37% |
| MM12T | SEPT9    | septin 9                                                               | CCDS45790.1     | chr17_75398315-75398315_G_A  | 84R>H   | Substitution | Nonsynonymous coding | 43% |
| MM12T | A1BG     | alpha-1-B glycoprotein                                                 | CCDS12976.1     | chr19_58862986-58862986_C_A  | 227K>N  | Substitution | Nonsynonymous coding | 16% |
| MM12T | A2ML1    | alpha-2-macroglobulin-like 1                                           | CCDS8596.2      | chr12_9010659-9010659_C_A    | 1075C>X | Substitution | Nonsense             | 11% |
| MM12T | AAK1     | AP2 associated kinase 1                                                | CCDS1893.2      | chr2_69784051-69784051_G_A   | 75R>C   | Substitution | Nonsynonymous coding | 15% |
| MM12T | AAK1     | AP2 associated kinase 1                                                | CCDS1893.2      | chr2_69752245-69752245_C_T   | ISV-1>  | Substitution | Splice site acceptor | 10% |
| MM12T | AAR2     | AAR2 splicing factor homolog (S. cerevisiae)                           | CCDS13273.1     | chr20_34828410-34828410_G_A  | 207R>H  | Substitution | Nonsynonymous coding | 31% |
| MM12T | AASS     | aminoadipate-semialdehyde synthase                                     | CCDS5783.1      | chr7_121773650-121773650_G_T | 44P>H   | Substitution | Nonsynonymous coding | 30% |
| MM12T | ABAT     | 4-aminobutyrate aminotransferase                                       | CCDS10534.1     | chr16_8866733-8866733_T_C    | 305S>P  | Substitution | Nonsynonymous coding | 33% |
| MM12T | ABCA1    | ATP-binding cassette, sub-family A (ABC1), member 1                    | CCDS6762.1      | chr9_107645412-107645412_C_T | 110R>Q  | Substitution | Nonsynonymous coding | 22% |
| MM12T | ABCA1    | ATP-binding cassette, sub-family A (ABC1), member 1                    | CCDS6762.1      | chr9_107556794-107556794_A   | NA      | Deletion     | Splice site acceptor | 16% |
| MM12T | ABCA1    | ATP-binding cassette, sub-family A (ABC1), member 1                    | CCDS6762.1      | chr9_107556794-107556795_AA  | NA      | Deletion     | Splice site acceptor | 11% |
| MM12T | ABCA13   | ATP-binding cassette, sub-family A (ABC1), member 13                   | CCDS47584.1     | chr7_48411808-48411808_C_T   | 3616A>V | Substitution | Nonsynonymous coding | 14% |
| MM12T | ABCA2    | ATP-binding cassette, sub-family A (ABC1), member 2                    | CCDS43909.1     | chr9_139909991-139909991_C_T | 1191R>H | Substitution | Nonsynonymous coding | 12% |
| MM12T | ABCA2    | ATP-binding cassette, sub-family A (ABC1), member 2                    | CCDS43909.1     | chr9_139914880-139914880_G_A | 445R>W  | Substitution | Nonsynonymous coding | 11% |
| MM12T | ABCA2    | ATP-binding cassette, sub-family A (ABC1), member 2                    | CCDS43909.1     | chr9_139917508-139917508_G_A | ISV-4>  | Substitution | Splice site acceptor | 12% |
| MM12T | ABCA2    | ATP-binding cassette, sub-family A (ABC1), member 2                    | CCDS43909.1     | chr9_139911099-139911099_C_T | 950W>X  | Substitution | Nonsense             | 34% |
| MM12T | ABCA3    | ATP-binding cassette, sub-family A (ABC1), member 3                    | CCDS10466.1     | chr16_2347480-2347480_C_T    | 705D>N  | Substitution | Nonsynonymous coding | 27% |
| MM12T | ABCA3    | ATP-binding cassette, sub-family A (ABC1), member 3                    | CCDS10466.1     | chr16_2369817-2369817_G_A    | 213A>V  | Substitution | Nonsynonymous coding | 29% |
| MM12T | ABCA3    | ATP-binding cassette, sub-family A (ABC1), member 3                    | CCDS10466.1     | chr16_2373544-2373544_G_T    | 198S>Y  | Substitution | Nonsynonymous coding | 29% |

|       |         |                                                          |              |                               |         |              |                      |     |
|-------|---------|----------------------------------------------------------|--------------|-------------------------------|---------|--------------|----------------------|-----|
| MM12T | ABCA7   | ATP-binding cassette, sub-family A (ABC1), member 7      | CCDS12055.1  | chr19_1047375-1047375_G_A     | 689A>T  | Substitution | Nonsynonymous coding | 45% |
| MM12T | ABCA7   | ATP-binding cassette, sub-family A (ABC1), member 7      | CCDS12055.1  | chr19_1049327-1049327_C_T     | 815R>C  | Substitution | Nonsynonymous coding | 11% |
| MM12T | ABCA9   | ATP-binding cassette, sub-family A (ABC1), member 9      | CCDS11681.1  | chr17_67045483-67045483_G_T   | 82P>H   | Substitution | Nonsynonymous coding | 20% |
| MM12T | ABCB1   | ATP-binding cassette, sub-family B (MDR/TAP), member 1   | CCDS5608.1   | chr7_87178770-87178770_G_A    | 540A>V  | Substitution | Nonsynonymous coding | 32% |
| MM12T | ABCB4   | ATP-binding cassette, sub-family B (MDR/TAP), member 4   | CCDS5606.1   | chr7_87074282-87074282_A_     | NA      | Deletion     | Frameshift           | 15% |
| MM12T | ABCB4   | ATP-binding cassette, sub-family B (MDR/TAP), member 4   | CCDS5606.1   | chr7_87079399-87079399_C_T    | 240A>T  | Substitution | Nonsynonymous coding | 12% |
| MM12T | ABCB5   | ATP-binding cassette, sub-family B (MDR/TAP), member 5   | NM_001163941 | chr7_20668418-20668418_G_A    | 72M>I   | Substitution | Nonsynonymous coding | 20% |
| MM12T | ABCB5   | ATP-binding cassette, sub-family B (MDR/TAP), member 5   | NM_001163941 | chr7_20682869-20682869_C_T    | 126S>F  | Substitution | Nonsynonymous coding | 31% |
| MM12T | ABCB5   | ATP-binding cassette, sub-family B (MDR/TAP), member 5   | CCDS5371.1   | chr7_20762730-20762730_C_T    | 393T>I  | Substitution | Nonsynonymous coding | 23% |
| MM12T | ABCB5   | ATP-binding cassette, sub-family B (MDR/TAP), member 5   | CCDS5371.1   | chr7_20778692-20778692_C_A    | 540A>D  | Substitution | Nonsynonymous coding | 38% |
| MM12T | ABCB6   | ATP-binding cassette, sub-family B (MDR/TAP), member 6   | CCDS2436.1   | chr2_220075737-220075737_G_A  | 688R>C  | Substitution | Nonsynonymous coding | 21% |
| MM12T | ABCB6   | ATP-binding cassette, sub-family B (MDR/TAP), member 6   | CCDS2436.1   | chr2_220078366-220078366_C_T  | 534G>D  | Substitution | Nonsynonymous coding | 13% |
| MM12T | ABCB9   | ATP-binding cassette, sub-family B (MDR/TAP), member 9   | CCDS9241.1   | chr12_123414652-123414652_T_C | 703T>A  | Substitution | Nonsynonymous coding | 30% |
| MM12T | ABCC10  | ATP-binding cassette, sub-family C (CFTR/MRP), member 10 | CCDS4896.1   | chr6_43413520-43413520_C_T    | 1044P>S | Substitution | Nonsynonymous coding | 12% |
| MM12T | ABCC12  | ATP-binding cassette, sub-family C (CFTR/MRP), member 12 | CCDS10730.1  | chr16_48180280-48180280_C_A   | 19R>I   | Substitution | Nonsynonymous coding | 36% |
| MM12T | ABCC12  | ATP-binding cassette, sub-family C (CFTR/MRP), member 12 | CCDS10730.1  | chr16_48145704-48145704_G_A   | 703R>X  | Substitution | Nonsense             | 11% |
| MM12T | ABCC2   | ATP-binding cassette, sub-family C (CFTR/MRP), member 2  | CCDS7484.1   | chr10_101604157-101604157_C_T | 1308R>W | Substitution | Nonsynonymous coding | 14% |
| MM12T | ABCC3   | ATP-binding cassette, sub-family C (CFTR/MRP), member 3  | CCDS32681.1  | chr17_48746589-48746589_G_A   | 676G>R  | Substitution | Nonsynonymous coding | 32% |
| MM12T | ABCC5   | ATP-binding cassette, sub-family C (CFTR/MRP), member 5  | CCDS43176.1  | chr3_183689395-183689395_G_A  | 573R>C  | Substitution | Nonsynonymous coding | 10% |
| MM12T | ABCC6   | ATP-binding cassette, sub-family C (CFTR/MRP), member 6  | CCDS10568.1  | chr16_16256898-16256898_C_T   | 1153R>H | Substitution | Nonsynonymous coding | 17% |
| MM12T | ABCD1   | ATP-binding cassette, sub-family D (ALD), member 1       | CCDS14728.1  | chrX_152990830-152990830_C_T  | 37R>C   | Substitution | Nonsynonymous coding | 40% |
| MM12T | ABCD1   | ATP-binding cassette, sub-family D (ALD), member 1       | CCDS14728.1  | chrX_152991454-152991454_G_A  | 245A>T  | Substitution | Nonsynonymous coding | 36% |
| MM12T | ABCD4   | ATP-binding cassette, sub-family D (ALD), member 4       | CCDS9828.1   | chr14_74759920-74759920_G_A   | 251R>C  | Substitution | Nonsynonymous coding | 31% |
| MM12T | ABCF1   | ATP-binding cassette, sub-family F (GCN20), member 1     | CCDS34380.1  | chr6_30545854-30545854_AA     | NA      | Insertion    | Frameshift           | 13% |
| MM12T | ABCF1   | ATP-binding cassette, sub-family F (GCN20), member 1     | CCDS34380.1  | chr6_30553124-30553124_C_T    | ISV+4>  | Substitution | Splice site donor    | 21% |
| MM12T | ABCG1   | ATP-binding cassette, sub-family G (WHITE), member 1     | CCDS13682.1  | chr21_43708097-43708097_G_A   | 358G>R  | Substitution | Nonsynonymous coding | 13% |
| MM12T | ABCG4   | ATP-binding cassette, sub-family G (WHITE), member 4     | CCDS8415.1   | chr11_119031698-119031698_C_T | 608A>V  | Substitution | Nonsynonymous coding | 12% |
| MM12T | ABCG5   | ATP-binding cassette, sub-family G (WHITE), member 5     | CCDS1814.1   | chr2_44051091-44051091_C_T    | 429A>T  | Substitution | Nonsynonymous coding | 16% |
| MM12T | ABCG8   | ATP-binding cassette, sub-family G (WHITE), member 8     | CCDS1815.1   | chr2_44078920-44078920_C_T    | 174R>W  | Substitution | Nonsynonymous coding | 31% |
| MM12T | ABHD12  | abhydrolase domain containing 12                         | CCDS13172.1  | chr20_25290170-25290170_T_C   | 221T>A  | Substitution | Nonsynonymous coding | 32% |
| MM12T | ABHD16B | abhydrolase domain containing 16B                        | CCDS13539.1  | chr20_62493870-62493870_G_A   | 326S>N  | Substitution | Nonsynonymous coding | 11% |
| MM12T | ABHD3   | abhydrolase domain containing 3                          | CCDS32802.1  | chr18_19263897-19263897_G_A   | 180A>V  | Substitution | Nonsynonymous coding | 13% |



|       |             |                                                                                     |                 |                               |         |              |                      |     |
|-------|-------------|-------------------------------------------------------------------------------------|-----------------|-------------------------------|---------|--------------|----------------------|-----|
| MM12T | ABI1        | abl-interactor 1                                                                    | CCDS7150.1      | chr10_27059246-27059246_C_A   | 169G>V  | Substitution | Nonsynonymous coding | 17% |
| MM12T | ABI3BP      | ABI family, member 3 (NESH) binding protein                                         | CCDS46880.1     | chr3_100523693-100523693_G_A  | 564R>C  | Substitution | Nonsynonymous coding | 38% |
| MM12T | ABI3BP      | ABI family, member 3 (NESH) binding protein                                         | CCDS46880.1     | chr3_100527008-100527008_G_T  | 557P>T  | Substitution | Nonsynonymous coding | 16% |
| MM12T | ABI3BP      | ABI family, member 3 (NESH) binding protein                                         | CCDS46880.1     | chr3_100605164-100605164_A_C  | 162F>L  | Substitution | Nonsynonymous coding | 44% |
| MM12T | ABL2        | v-abl Abelson murine leukemia viral oncogene homolog 2                              | CCDS30947.1     | chr1_179090747-179090747_C_T  | 315A>T  | Substitution | Nonsynonymous coding | 31% |
| MM12T | ABL2        | v-abl Abelson murine leukemia viral oncogene homolog 2                              | CCDS30947.1     | chr1_179079591-179079591_C_A  | ISV-1>  | Substitution | Splice site acceptor | 35% |
| MM12T | ABLIM1      | actin binding LIM protein 1                                                         | CCDS7590.1      | chr10_116203893-116203893_G_A | 610L>F  | Substitution | Nonsynonymous coding | 37% |
| MM12T | ABLIM3      | actin binding LIM protein family, member 3                                          | CCDS4294.1      | chr5_148630979-148630979_C_T  | 616R>X  | Substitution | Nonsense             | 16% |
| MM12T | ABP1        | amiloride binding protein 1 (amine oxidase (copper-containing))                     | CCDS43679.1     | chr7_150557660-150557660_C_T  | 643P>L  | Substitution | Nonsynonymous coding | 26% |
| MM12T | ABRA        | actin-binding Rho activating protein                                                | CCDS6305.1      | chr8_107781766-107781766_C_T  | 218R>H  | Substitution | Nonsynonymous coding | 37% |
| MM12T | AC006547.14 | uncharacterized protein LOC388849<br>[Source:RefSeq peptide;Acc:NP_001230466]       | ENST00000439765 | chr22_20138044-20138044_G_T   | 119A>D  | Substitution | Nonsynonymous coding | 13% |
| MM12T | AC009403.2  | Uncharacterized protein<br>[Source:UniProtKB/TrEMBL;Acc:B5MCR4]                     | ENST00000401694 | chr7_155404105-155404105_C_A  | 36E>D   | Substitution | Nonsynonymous coding | 30% |
| MM12T | AC016251.1  | -                                                                                   | ENST00000378936 | chr15_96831407-96831407_G_A   | 85T>M   | Substitution | Nonsynonymous coding | 22% |
| MM12T | AC079612.1  | Uncharacterized protein; cDNA FLJ45964 fis,<br>clone PLACE7014396                   | ENST00000358775 | chr2_240500540-240500540_G_A  | 141A>T  | Substitution | Nonsynonymous coding | 32% |
| MM12T | AC093802.1  | Uncharacterized protein<br>[Source:UniProtKB/TrEMBL;Acc:B5MD18]                     | ENST00000407524 | chr2_240702099-240702099_G_A  | 50R>H   | Substitution | Nonsynonymous coding | 50% |
| MM12T | AC114273.1  | -                                                                                   | ENST00000397365 | chr19_16146326-16146326_C_T   | 123R>C  | Substitution | Nonsynonymous coding | 14% |
| MM12T | AC115618.1  | Uncharacterized protein; cDNA FLJ26048 fis,<br>clone PRS02384                       | ENST00000376775 | chrX_48433140-48433140_C_T    | 37A>T   | Substitution | Nonsynonymous coding | 30% |
| MM12T | AC133919.6  | Uncharacterized protein; cDNA FLJ52651<br>[Source:UniProtKB/TrEMBL;Acc:B7Z8Y8]      | ENST00000409768 | chr16_90110975-90110975_G_A   | 15L>F   | Substitution | Nonsynonymous coding | 25% |
| MM12T | AC138647.1  | Uncharacterized protein<br>[Source:UniProtKB/TrEMBL;Acc:C9IYH1]                     | ENST00000427937 | chr8_142528537-142528537_G_A  | 97D>N   | Substitution | Nonsynonymous coding | 17% |
| MM12T | ACAA1       | acetyl-CoA acyltransferase 1                                                        | CCDS2673.1      | chr3_38178412-38178412_C_T    | 39V>M   | Substitution | Nonsynonymous coding | 20% |
| MM12T | ACAA2       | acetyl-CoA acyltransferase 2                                                        | CCDS11939.1     | chr18_47318689-47318689_C_T   | 196A>T  | Substitution | Nonsynonymous coding | 15% |
| MM12T | ACACB       | acetyl-CoA carboxylase beta                                                         | CCDS31898.1     | chr12_109623408-109623408_C_T | 615R>W  | Substitution | Nonsynonymous coding | 31% |
| MM12T | ACACB       | acetyl-CoA carboxylase beta                                                         | CCDS31898.1     | chr12_109654684-109654684_G_A | 1175A>T | Substitution | Nonsynonymous coding | 11% |
| MM12T | ACAD10      | acyl-CoA dehydrogenase family, member 10                                            | CCDS44973.1     | chr12_112165918-112165918_C_T | 436A>V  | Substitution | Nonsynonymous coding | 13% |
| MM12T | ACADL       | acyl-CoA dehydrogenase, long chain                                                  | CCDS2389.1      | chr2_211082758-211082758_A_G  | 101V>A  | Substitution | Nonsynonymous coding | 19% |
| MM12T | ACCS        | 1-aminocyclopropane-1-carboxylate synthase<br>homolog (Arabidopsis)(non-functional) | CCDS7907.1      | chr11_44102787-44102787_C_T   | 343A>V  | Substitution | Nonsynonymous coding | 26% |
| MM12T | ACE         | angiotensin I converting enzyme (peptidyl-<br>dipeptidase A) 1                      | CCDS11637.1     | chr17_61560847-61560847_C_T   | 505P>L  | Substitution | Nonsynonymous coding | 19% |
| MM12T | ACE         | angiotensin I converting enzyme (peptidyl-<br>dipeptidase A) 1                      | CCDS11637.1     | chr17_61560877-61560877_C_T   | 515A>V  | Substitution | Nonsynonymous coding | 25% |
| MM12T | ACE         | angiotensin I converting enzyme (peptidyl-<br>dipeptidase A) 1                      | CCDS11637.1     | chr17_61573795-61573795_G_A   | 1141A>T | Substitution | Nonsynonymous coding | 37% |
| MM12T | ACOX2       | acyl-CoA oxidase 2, branched chain                                                  | CCDS33775.1     | chr3_58520148-58520148_G_A    | 88R>W   | Substitution | Nonsynonymous coding | 27% |
| MM12T | ACP2        | acid phosphatase 2, lysosomal                                                       | CCDS7928.1      | chr11_47261698-47261698_C_T   | 414R>H  | Substitution | Nonsynonymous coding | 10% |
| MM12T | ACPL2       | acid phosphatase-like 2                                                             | CCDS3116.1      | chr3_140998312-140998312_C_T  | 111R>X  | Substitution | Nonsense             | 33% |

|       |          |                                                                          |             |                               |         |              |                      |     |
|-------|----------|--------------------------------------------------------------------------|-------------|-------------------------------|---------|--------------|----------------------|-----|
| MM12T | ACRC     | acidic repeat containing                                                 | CCDS35326.1 | chrX_70824284-70824284_C_A    | 386P>H  | Substitution | Nonsynonymous coding | 36% |
| MM12T | ACSL4    | acyl-CoA synthetase long-chain family member 4                           | CCDS14548.1 | chrX_108911458-108911458_C_T  | 437R>H  | Substitution | Nonsynonymous coding | 22% |
| MM12T | ACSL5    | acyl-CoA synthetase long-chain family member 5                           | CCDS7572.1  | chr10_114187105-114187105_A_G | 737I>V  | Substitution | Nonsynonymous coding | 32% |
| MM12T | ACSL6    | acyl-CoA synthetase long-chain family member 6                           | CCDS34228.1 | chr5_131308972-131308972_C_T  | 397R>Q  | Substitution | Nonsynonymous coding | 14% |
| MM12T | ACSL6    | acyl-CoA synthetase long-chain family member 6                           | CCDS34228.1 | chr5_131323864-131323864_C_A  | 236E>D  | Substitution | Nonsynonymous coding | 13% |
| MM12T | ACSM2B   | acyl-CoA synthetase medium-chain family member 2B                        | CCDS10586.1 | chr16_20563515-20563515_C_T   | 282C>Y  | Substitution | Nonsynonymous coding | 17% |
| MM12T | ACSM4    | acyl-CoA synthetase medium-chain family member 4                         | CCDS44825.1 | chr12_7473398-7473398_G_T     | 333K>N  | Substitution | Nonsynonymous coding | 10% |
| MM12T | ACSS2    | acyl-CoA synthetase short-chain family member 2                          | CCDS13243.1 | chr20_33507322-33507322_G_A   | 307A>T  | Substitution | Nonsynonymous coding | 25% |
| MM12T | ACTL7A   | actin-like 7A                                                            | CCDS6772.1  | chr9_111625501-111625501_G_A  | 300R>H  | Substitution | Nonsynonymous coding | 10% |
| MM12T | ACTL7B   | actin-like 7B                                                            | CCDS6771.1  | chr9_111617720-111617720_G_A  | 164A>V  | Substitution | Nonsynonymous coding | 31% |
| MM12T | ACTL8    | actin-like 8                                                             | CCDS183.1   | chr1_18152404-18152404_G_A    | 164R>H  | Substitution | Nonsynonymous coding | 11% |
| MM12T | ACTN1    | actinin, alpha 1                                                         | CCDS45130.1 | chr14_69349672-69349672_A_T   | 579V>D  | Substitution | Nonsynonymous coding | 27% |
| MM12T | ACTN1    | actinin, alpha 1                                                         | CCDS45130.1 | chr14_69369214-69369214_C_T   | 248A>T  | Substitution | Nonsynonymous coding | 32% |
| MM12T | ACTN2    | actinin, alpha 2                                                         | CCDS1613.1  | chr1_236881198-236881198_G_A  | 56G>D   | Substitution | Nonsynonymous coding | 23% |
| MM12T | ACTN2    | actinin, alpha 2                                                         | CCDS1613.1  | chr1_236906196-236906196_G_A  | 370D>N  | Substitution | Nonsynonymous coding | 16% |
| MM12T | ACTN4    | actinin, alpha 4                                                         | CCDS12518.1 | chr19_39214259-39214259_T_C   | 483L>P  | Substitution | Nonsynonymous coding | 33% |
| MM12T | ACTR1A   | ARP1 actin-related protein 1 homolog A, cactractin alpha (yeast)         | CCDS7536.1  | chr10_104242820-104242820_G_A | 233T>M  | Substitution | Nonsynonymous coding | 33% |
| MM12T | ACTR6    | ARP6 actin-related protein 6 homolog (yeast)                             | CCDS9074.1  | chr12_100613790-100613790_G_C | 309M>I  | Substitution | Nonsynonymous coding | 50% |
| MM12T | ACTRT3   | actin-related protein T3                                                 | CCDS3206.1  | chr3_169486049-169486049_G_A  | 97P>L   | Substitution | Nonsynonymous coding | 36% |
| MM12T | ACVR2B   | activin A receptor, type IIB                                             | CCDS2679.1  | chr3_38518844-38518844_G_A    | 40R>H   | Substitution | Nonsynonymous coding | 13% |
| MM12T | ADAD2    | adenosine deaminase domain containing 2                                  | CCDS10944.1 | chr16_84228102-84228102_C_T   | 230A>V  | Substitution | Nonsynonymous coding | 35% |
| MM12T | ADAM15   | ADAM metallopeptidase domain 15                                          | CCDS1087.1  | chr1_155029568-155029568_C_T  | 380A>V  | Substitution | Nonsynonymous coding | 34% |
| MM12T | ADAM18   | ADAM metallopeptidase domain 18                                          | CCDS6113.1  | chr8_39525629-39525629_G_A    | 480G>D  | Substitution | Nonsynonymous coding | 14% |
| MM12T | ADAM19   | ADAM metallopeptidase domain 19                                          | CCDS4338.1  | chr5_156991409-156991409_C_T  | 75E>K   | Substitution | Nonsynonymous coding | 33% |
| MM12T | ADAM23   | ADAM metallopeptidase domain 23                                          | CCDS2369.1  | chr2_207422202-207422202_G_A  | 329V>M  | Substitution | Nonsynonymous coding | 24% |
| MM12T | ADAM7    | ADAM metallopeptidase domain 7                                           | CCDS6045.1  | chr8_24342794-24342794_A_G    | 294K>E  | Substitution | Nonsynonymous coding | 14% |
| MM12T | ADAM8    | ADAM metallopeptidase domain 8                                           | NM_001109   | chr10_135085374-135085374_C_T | 348V>I  | Substitution | Nonsynonymous coding | 36% |
| MM12T | ADAM9    | ADAM metallopeptidase domain 9                                           | CCDS6112.1  | chr8_38899526-38899526_G_A    | 398G>R  | Substitution | Nonsynonymous coding | 12% |
| MM12T | ADAMTS10 | ADAM metallopeptidase with thrombospondin type 1 motif, 10 [Source:HGNC] | CCDS12206.1 | chr19_8651744-8651744_A_G     | 732V>A  | Substitution | Nonsynonymous coding | 36% |
| MM12T | ADAMTS12 | ADAM metallopeptidase with thrombospondin type 1 motif, 12               | CCDS34140.1 | chr5_33576635-33576635_G_A    | 1166P>S | Substitution | Nonsynonymous coding | 31% |
| MM12T | ADAMTS13 | ADAM metallopeptidase with thrombospondin type 1 motif, 13               | CCDS6970.1  | chr9_136295180-136295180_G_A  | 316G>S  | Substitution | Nonsynonymous coding | 29% |
| MM12T | ADAMTS2  | ADAM metallopeptidase with thrombospondin type 1 motif, 2                | CCDS4444.1  | chr5_178564928-178564928_C_T  | 598R>H  | Substitution | Nonsynonymous coding | 14% |

|       |          |                                                            |             |                              |        |              |                      |     |
|-------|----------|------------------------------------------------------------|-------------|------------------------------|--------|--------------|----------------------|-----|
| MM12T | ADAMTS3  | ADAM metalloproteinase with thrombospondin type 1 motif, 3 | CCDS3553.1  | chr4_73188757-73188757_G_A   | 307R>C | Substitution | Nonsynonymous coding | 13% |
| MM12T | ADAMTS6  | ADAM metalloproteinase with thrombospondin type 1 motif, 6 | CCDS3983.2  | chr5_64558659-64558659_T_C   | 584H>R | Substitution | Nonsynonymous coding | 40% |
| MM12T | ADAMTS6  | ADAM metalloproteinase with thrombospondin type 1 motif, 6 | CCDS3983.2  | chr5_64748662-64748662_G_T   | 239H>N | Substitution | Nonsynonymous coding | 23% |
| MM12T | ADAMTS6  | ADAM metalloproteinase with thrombospondin type 1 motif, 6 | CCDS3983.2  | chr5_64511309-64511309_T_A   | 760K>X | Substitution | Nonsense             | 11% |
| MM12T | ADAMTSL2 | ADAMTS-like 2                                              | CCDS6976.1  | chr9_136412178-136412178_G_A | 261G>D | Substitution | Nonsynonymous coding | 34% |
| MM12T | ADAMTSL2 | ADAMTS-like 2                                              | CCDS6976.1  | chr9_136426348-136426348_G_A | 560V>M | Substitution | Nonsynonymous coding | 28% |
| MM12T | ADAMTSL3 | ADAMTS-like 3                                              | CCDS10326.1 | chr15_84442329-84442329_G_A  | 82G>S  | Substitution | Nonsynonymous coding | 24% |
| MM12T | ADAMTSL3 | ADAMTS-like 3                                              | CCDS10326.1 | chr15_84611704-84611704_G_A  | 787R>Q | Substitution | Nonsynonymous coding | 28% |
| MM12T | ADAMTSL4 | ADAMTS-like 4                                              | CCDS955.1   | chr1_150530506-150530506_G   | NA     | Insertion    | Frameshift           | 28% |
| MM12T | ADAP1    | ArfGAP with dual PH domains 1                              | CCDS5318.1  | chr7_938673-938673_C_T       | 365A>T | Substitution | Nonsynonymous coding | 35% |
| MM12T | ADARB2   | adenosine deaminase, RNA-specific, B2                      | CCDS7058.1  | chr10_1263027-1263027_G_A    | 516R>C | Substitution | Nonsynonymous coding | 21% |
| MM12T | ADARB2   | adenosine deaminase, RNA-specific, B2                      | CCDS7058.1  | chr10_1313222-1313222_G_A    | 374R>C | Substitution | Nonsynonymous coding | 40% |
| MM12T | ADARB2   | adenosine deaminase, RNA-specific, B2                      | CCDS7058.1  | chr10_1405345-1405345_C_A    | 319G>C | Substitution | Nonsynonymous coding | 35% |
| MM12T | ADAT3    | adenosine deaminase, tRNA-specific 3                       | CCDS12076.1 | chr19_1912408-1912408_C_T    | 105S>L | Substitution | Nonsynonymous coding | 32% |
| MM12T | ADCK3    | aarF domain containing kinase 3                            | CCDS1557.1  | chr1_227174371-227174371_G_A | 626R>H | Substitution | Nonsynonymous coding | 33% |
| MM12T | ADCK5    | aarF domain containing kinase 5                            | CCDS34965.1 | chr8_145618058-145618058_C_T | 530R>C | Substitution | Nonsynonymous coding | 33% |
| MM12T | ADCY1    | adenylate cyclase 1 (brain)                                | CCDS34631.1 | chr7_45632413-45632413_G_A   | 232R>Q | Substitution | Nonsynonymous coding | 11% |
| MM12T | ADCY10   | adenylate cyclase 10 (soluble)                             | CCDS1265.1  | chr1_167815477-167815477_C_A | 821S>I | Substitution | Nonsynonymous coding | 32% |
| MM12T | ADCY2    | adenylate cyclase 2 (brain)                                | CCDS3872.2  | chr5_7690820-7690820_C_A     | 246S>Y | Substitution | Nonsynonymous coding | 10% |
| MM12T | ADCY3    | adenylate cyclase 3                                        | CCDS1715.1  | chr2_25061487-25061487_C_T   | 454V>M | Substitution | Nonsynonymous coding | 13% |
| MM12T | ADCY4    | adenylate cyclase 4                                        | CCDS9627.1  | chr14_24789040-24789040_C_A  | 881D>Y | Substitution | Nonsynonymous coding | 24% |
| MM12T | ADCY4    | adenylate cyclase 4                                        | CCDS9627.1  | chr14_24798723-24798723_C_A  | 412G>W | Substitution | Nonsynonymous coding | 36% |
| MM12T | ADCY5    | adenylate cyclase 5                                        | CCDS3022.1  | chr3_123016228-123016228_C_A | 968D>Y | Substitution | Nonsynonymous coding | 30% |
| MM12T | ADCY9    | adenylate cyclase 9                                        | CCDS32382.1 | chr16_4164885-4164885_T_A    | 187T>S | Substitution | Nonsynonymous coding | 14% |
| MM12T | ADCY9    | adenylate cyclase 9                                        | CCDS32382.1 | chr16_4164935-4164935_C_T    | 170R>Q | Substitution | Nonsynonymous coding | 13% |
| MM12T | ADCY9    | adenylate cyclase 9                                        | CCDS32382.1 | chr16_4165403-4165403_C_T    | 14S>N  | Substitution | Nonsynonymous coding | 44% |
| MM12T | ADD1     | adducin 1 (alpha)                                          | CCDS3363.1  | chr4_2906581-2906581_G_T     | 418G>C | Substitution | Nonsynonymous coding | 12% |
| MM12T | ADH6     | alcohol dehydrogenase 6 (class V)                          | CCDS43255.1 | chr4_100126172-100126172_G_A | 338A>V | Substitution | Nonsynonymous coding | 13% |
| MM12T | ADNP     | activity-dependent neuroprotector homeobox                 | CCDS13433.1 | chr20_49510514-49510514_C_T  | 246R>H | Substitution | Nonsynonymous coding | 21% |
| MM12T | ADRA1D   | adrenoceptor alpha 1D                                      | CCDS13079.1 | chr20_4228545-4228545_C_G    | 354V>L | Substitution | Nonsynonymous coding | 29% |
| MM12T | ADRA1D   | adrenoceptor alpha 1D                                      | CCDS13079.1 | chr20_4228719-4228719_G_A    | 296R>X | Substitution | Nonsense             | 19% |
| MM12T | ADRB2    | adrenoceptor beta 2, surface                               | CCDS4292.1  | chr5_148206743-148206743_G_A | 117V>I | Substitution | Nonsynonymous coding | 36% |

|       |         |                                                           |                 |                               |         |              |                      |     |
|-------|---------|-----------------------------------------------------------|-----------------|-------------------------------|---------|--------------|----------------------|-----|
| MM12T | ADRB2   | adrenoceptor beta 2, surface                              | CCDS4292.1      | chr5_148207518-148207518_A_G  | 375K>R  | Substitution | Nonsynonymous coding | 24% |
| MM12T | ADRBK2  | adrenergic, beta, receptor kinase 2                       | CCDS13832.1     | chr22_26086237-26086237_C_T   | 347P>S  | Substitution | Nonsynonymous coding | 33% |
| MM12T | ADRM1   | adhesion regulating molecule 1                            | CCDS13496.1     | chr20_60882875-60882875_G_A   | 283G>S  | Substitution | Nonsynonymous coding | 30% |
| MM12T | ADSSL1  | adenylosuccinate synthase like 1                          | CCDS9991.1      | chr14_105206132-105206132_G_A | 195R>H  | Substitution | Nonsynonymous coding | 13% |
| MM12T | ADSSL1  | adenylosuccinate synthase like 1                          | CCDS9991.1      | chr14_105208301-105208301_C_T | 347R>C  | Substitution | Nonsynonymous coding | 31% |
| MM12T | AES     | amino-terminal enhancer of split                          | CCDS12101.1     | chr19_3057690-3057690_C_T     | 126R>H  | Substitution | Nonsynonymous coding | 33% |
| MM12T | AFF2    | AF4/FMR2 family, member 2                                 | CCDS14684.1     | chrX_147924511-147924511_G_A  | 399G>R  | Substitution | Nonsynonymous coding | 28% |
| MM12T | AFTPH   | aftiphilin                                                | CCDS46303.1     | chr2_64779291-64779291_C_A    | 228A>D  | Substitution | Nonsynonymous coding | 21% |
| MM12T | AGAP1   | ArfGAP with GTPase domain, ankyrin repeat and PH domain 1 | ENST00000409538 | chr2_236579396-236579396_G_T  | 218S>I  | Substitution | Nonsynonymous coding | 19% |
| MM12T | AGAP3   | ArfGAP with GTPase domain, ankyrin repeat and PH domain 3 | CCDS43681.1     | chr7_150820954-150820954_G_A  | 401R>H  | Substitution | Nonsynonymous coding | 38% |
| MM12T | AGAP3   | ArfGAP with GTPase domain, ankyrin repeat and PH domain 3 | CCDS43681.1     | chr7_150835251-150835251_G_T  | 506S>I  | Substitution | Nonsynonymous coding | 33% |
| MM12T | AGBL3   | ATP/GTP binding protein-like 3                            | CCDS47718.1     | chr7_134719318-134719318_C_T  | 326R>C  | Substitution | Nonsynonymous coding | 35% |
| MM12T | AGBL4   | ATP/GTP binding protein-like 4                            | CCDS44137.1     | chr1_49100240-49100240_C_T    | 292W>X  | Substitution | Nonsense             | 39% |
| MM12T | AGL     | amylo-alpha-1, 6-glucosidase, 4-alpha-glucanotransferase  | CCDS759.1       | chr1_100378028-100378028_A    | NA      | Insertion    | Frameshift           | 25% |
| MM12T | AGRN    | agrin                                                     | CCDS30551.1     | chr1_978822-978822_C_T        | 530R>C  | Substitution | Nonsynonymous coding | 13% |
| MM12T | AGRN    | agrin                                                     | CCDS30551.1     | chr1_984732-984732_G_A        | 1472G>D | Substitution | Nonsynonymous coding | 34% |
| MM12T | AGRN    | agrin                                                     | CCDS30551.1     | chr1_989927-989927_G_A        | 1992W>X | Substitution | Nonsense             | 11% |
| MM12T | AGTPBP1 | ATP/GTP binding protein 1                                 | CCDS6672.1      | chr9_88193951-88193951_C_T    | 1036V>I | Substitution | Nonsynonymous coding | 30% |
| MM12T | AGXT    | alanine-glyoxylate aminotransferase                       | CCDS2543.1      | chr2_241815404-241815404_G_A  | 277A>T  | Substitution | Nonsynonymous coding | 17% |
| MM12T | AHCTF1  | AT hook containing transcription factor 1                 | CCDS1629.1      | chr1_247059155-247059155_G_A  | 566R>X  | Substitution | Nonsense             | 11% |
| MM12T | AHCY    | adenosylhomocysteinase                                    | CCDS13233.1     | chr20_32873350-32873350_T_C   | 355S>G  | Substitution | Nonsynonymous coding | 31% |
| MM12T | AHCY    | adenosylhomocysteinase                                    | CCDS13233.1     | chr20_32878558-32878558_C_T   | 249A>T  | Substitution | Nonsynonymous coding | 11% |
| MM12T | AHCYL2  | adenosylhomocysteinase-like 2                             | CCDS5812.1      | chr7_129028981-129028981_G_A  | 187C>Y  | Substitution | Nonsynonymous coding | 25% |
| MM12T | AHDC1   | AT hook, DNA binding motif, containing 1                  | CCDS30652.1     | chr1_27876688-27876688_G_A    | 647H>Y  | Substitution | Nonsynonymous coding | 33% |
| MM12T | AHDC1   | AT hook, DNA binding motif, containing 1                  | CCDS30652.1     | chr1_27878430-27878430_C_T    | 66R>H   | Substitution | Nonsynonymous coding | 24% |
| MM12T | AHNAK   | AHNAK nucleoprotein                                       | CCDS31584.1     | chr11_62285796-62285796_G_T   | 5365L>M | Substitution | Nonsynonymous coding | 11% |
| MM12T | AHNAK   | AHNAK nucleoprotein                                       | CCDS31584.1     | chr11_62291642-62291642_G_T   | 3416S>Y | Substitution | Nonsynonymous coding | 26% |
| MM12T | AHNAK   | AHNAK nucleoprotein                                       | CCDS31584.1     | chr11_62300333-62300333_T_G   | 519K>T  | Substitution | Nonsynonymous coding | 34% |
| MM12T | AHNAK   | AHNAK nucleoprotein                                       | CCDS31584.1     | chr11_62300931-62300931_G_A   | 320R>C  | Substitution | Nonsynonymous coding | 10% |
| MM12T | AHNAK2  | AHNAK nucleoprotein 2                                     | CCDS45177.1     | chr14_105404639-105404639_C_T | 5717D>N | Substitution | Nonsynonymous coding | 31% |
| MM12T | AK5     | adenylate kinase 5                                        | CCDS675.1       | chr1_77759510-77759510_C_T    | 94R>W   | Substitution | Nonsynonymous coding | 10% |
| MM12T | AKAP12  | A kinase (PKA) anchor protein 12                          | CCDS5229.1      | chr6_151673894-151673894_A_C  | 1456K>N | Substitution | Nonsynonymous coding | 25% |

|       |            |                                                                                           |                 |                               |         |              |                      |     |
|-------|------------|-------------------------------------------------------------------------------------------|-----------------|-------------------------------|---------|--------------|----------------------|-----|
| MM12T | AKAP3      | A kinase (PRKA) anchor protein 3                                                          | CCDS8531.1      | chr12_4735823-4735823_G_T     | 749P>T  | Substitution | Nonsynonymous coding | 29% |
| MM12T | AKAP4      | A kinase (PRKA) anchor protein 4                                                          | CCDS14329.1     | chrX_49958916-49958916_C_A    | 150A>S  | Substitution | Nonsynonymous coding | 27% |
| MM12T | AKAP6      | A kinase (PRKA) anchor protein 6                                                          | CCDS9644.1      | chr14_33014655-33014655_C_T   | 266P>S  | Substitution | Nonsynonymous coding | 27% |
| MM12T | AKAP6      | A kinase (PRKA) anchor protein 6                                                          | CCDS9644.1      | chr14_33293591-33293591_C_T   | 2191A>V | Substitution | Nonsynonymous coding | 23% |
| MM12T | AKAP8      | A kinase (PRKA) anchor protein 8                                                          | CCDS12329.1     | chr19_15469876-15469876_G_A   | ISV-3>  | Substitution | Splice site acceptor | 14% |
| MM12T | AKAP9      | A kinase (PRKA) anchor protein (yotiao) 9                                                 | CCDS5622.1      | chr7_91630493-91630493_G_A    | 421R>Q  | Substitution | Nonsynonymous coding | 16% |
| MM12T | AKAP9      | A kinase (PRKA) anchor protein (yotiao) 9                                                 | CCDS5622.1      | chr7_91691662-91691662_C_T    | 1947R>C | Substitution | Nonsynonymous coding | 15% |
| MM12T | AKD1       | adenylate kinase domain containing 1                                                      | NM_001145128    | chr6_109863332-109863332_A_G  | 1090S>P | Substitution | Nonsynonymous coding | 22% |
| MM12T | AKR1E2     | aldo-keto reductase family 1, member E2                                                   | CCDS31134.1     | chr10_4875555-4875555_G_A     | 74C>Y   | Substitution | Nonsynonymous coding | 28% |
| MM12T | AKT1       | v-akt murine thymoma viral oncogene homolog 1                                             | CCDS9994.1      | chr14_105240286-105240286_C_T | 222R>H  | Substitution | Nonsynonymous coding | 10% |
| MM12T | AKT2       | v-akt murine thymoma viral oncogene homolog 2                                             | ENST00000391845 | chr19_40746192-40746192_C_T   | 4V>I    | Substitution | Nonsynonymous coding | 13% |
| MM12T | AL033381.1 | Uncharacterized protein; cDNA FLJ34594 fis, clone KIDNE2009109                            | ENST00000314040 | chr6_1102380-1102380_G_A      | 122D>N  | Substitution | Nonsynonymous coding | 22% |
| MM12T | AL359195.1 | Uncharacterized protein; cDNA FLJ46261 fis, clone TEST14025062                            | ENST00000356374 | chr10_82012502-82012502_G_A   | 7G>D    | Substitution | Nonsynonymous coding | 35% |
| MM12T | ALCAM      | activated leukocyte cell adhesion molecule                                                | CCDS33810.1     | chr3_105260570-105260570_A    | NA      | Insertion    | Frameshift           | 24% |
| MM12T | ALDH1A2    | aldehyde dehydrogenase 1 family, member A2                                                | CCDS10163.1     | chr15_58256142-58256142_G_A   | 343R>W  | Substitution | Nonsynonymous coding | 15% |
| MM12T | ALDH1B1    | aldehyde dehydrogenase 1 family, member B1                                                | CCDS6615.1      | chr9_38396764-38396764_T_C    | 340V>A  | Substitution | Nonsynonymous coding | 11% |
| MM12T | ALDH1L1    | aldehyde dehydrogenase 1 family, member L1                                                | CCDS3034.1      | chr3_125869343-125869343_C_T  | 297G>D  | Substitution | Nonsynonymous coding | 35% |
| MM12T | ALDH6A1    | aldehyde dehydrogenase 6 family, member A1                                                | CCDS9826.1      | chr14_74531957-74531957_C_T   | 444G>E  | Substitution | Nonsynonymous coding | 17% |
| MM12T | ALDH7A1    | aldehyde dehydrogenase 7 family, member A1                                                | CCDS4137.2      | chr5_125930773-125930773_C_T  | 40A>T   | Substitution | Nonsynonymous coding | 29% |
| MM12T | ALDH8A1    | aldehyde dehydrogenase 8 family, member A1                                                | CCDS5171.1      | chr6_135239923-135239923_G_A  | 365A>V  | Substitution | Nonsynonymous coding | 48% |
| MM12T | ALG1       | asparagine-linked glycosylation 1, beta-1,4-mannosyltransferase homolog (S. cerevisiae)   | CCDS10528.1     | chr16_5125468-5125468_A_G     | 157H>R  | Substitution | Nonsynonymous coding | 31% |
| MM12T | ALG12      | asparagine-linked glycosylation 12, alpha-1,6-mannosyltransferase homolog (S. cerevisiae) | CCDS14081.1     | chr22_50302920-50302920_G_T   | 247T>N  | Substitution | Nonsynonymous coding | 32% |
| MM12T | ALG3       | asparagine-linked glycosylation 3, alpha-1,3-mannosyltransferase homolog (S. cerevisiae)  | CCDS46968.1     | chr3_183963113-183963113_C_T  | 160A>T  | Substitution | Nonsynonymous coding | 12% |
| MM12T | ALK        | anaplastic lymphoma receptor tyrosine kinase                                              | CCDS33172.1     | chr2_29420442-29420442_G_A    | 1347R>W | Substitution | Nonsynonymous coding | 21% |
| MM12T | ALK        | anaplastic lymphoma receptor tyrosine kinase                                              | CCDS33172.1     | chr2_29430100-29430100_G_A    | 1292P>L | Substitution | Nonsynonymous coding | 29% |
| MM12T | ALK        | anaplastic lymphoma receptor tyrosine kinase                                              | CCDS33172.1     | chr2_29917827-29917827_G_A    | 281H>Y  | Substitution | Nonsynonymous coding | 27% |
| MM12T | ALK        | anaplastic lymphoma receptor tyrosine kinase                                              | CCDS33172.1     | chr2_30142900-30142900_C_T    | 209R>H  | Substitution | Nonsynonymous coding | 36% |
| MM12T | ALK        | anaplastic lymphoma receptor tyrosine kinase                                              | CCDS33172.1     | chr2_29551349-29551349_T_C    | ISV-2>  | Substitution | Splice site acceptor | 32% |
| MM12T | ALKBH6     | alkB, alkylation repair homolog 6 (E. coli)                                               | CCDS12485.2     | chr19_36501849-36501849_G_T   | 123L>I  | Substitution | Nonsynonymous coding | 17% |
| MM12T | ALKBH6     | alkB, alkylation repair homolog 6 (E. coli)                                               | CCDS12485.2     | chr19_36505076-36505076_C_T   | ISV+1>  | Substitution | Splice site donor    | 28% |
| MM12T | ALMS1      | Alstrom syndrome 1                                                                        | CCDS42697.1     | chr2_73717497-73717497_G_A    | 2803R>H | Substitution | Nonsynonymous coding | 33% |
| MM12T | ALOX12     | arachidonate 12-lipoxygenase                                                              | CCDS11084.1     | chr17_6901831-6901831_G_A     | 114R>H  | Substitution | Nonsynonymous coding | 11% |

|       |          |                                                                            |                 |                               |         |              |                      |     |
|-------|----------|----------------------------------------------------------------------------|-----------------|-------------------------------|---------|--------------|----------------------|-----|
| MM12T | ALOX12B  | arachidonate 12-lipoxygenase, 12R type                                     | CCDS11129.1     | chr17_7976159-7976159_C_T     | 679R>H  | Substitution | Nonsynonymous coding | 14% |
| MM12T | ALOX15B  | arachidonate 15-lipoxygenase, type B                                       | CCDS11128.1     | chr17_7948885-7948885_C_T     | 361R>C  | Substitution | Nonsynonymous coding | 24% |
| MM12T | ALPK2    | alpha-kinase 2                                                             | CCDS11966.2     | chr18_56247178-56247178_G_T   | 277S>Y  | Substitution | Nonsynonymous coding | 18% |
| MM12T | ALPL2    | alkaline phosphatase, placental-like 2                                     | CCDS2491.1      | chr2_233274523-233274523_G_A  | 514A>T  | Substitution | Nonsynonymous coding | 18% |
| MM12T | ALS2     | amyotrophic lateral sclerosis 2 (juvenile)                                 | CCDS42800.1     | chr2_202574700-202574700_C_T  | 1395R>K | Substitution | Nonsynonymous coding | 31% |
| MM12T | ALS2     | amyotrophic lateral sclerosis 2 (juvenile)                                 | CCDS42800.1     | chr2_202575815-202575815_G_A  | 1341R>C | Substitution | Nonsynonymous coding | 11% |
| MM12T | ALS2CL   | ALS2 C-terminal like                                                       | CCDS2743.1      | chr3_46727071-46727071_C_T    | 244A>T  | Substitution | Nonsynonymous coding | 28% |
| MM12T | ALS2CL   | ALS2 C-terminal like                                                       | CCDS2743.1      | chr3_46730870-46730870_C_T    | 21A>T   | Substitution | Nonsynonymous coding | 16% |
| MM12T | ALS2CR11 | amyotrophic lateral sclerosis 2 (juvenile) chromosome region, candidate 11 | NM_001168221    | chr2_202359041-202359041_G_A  | 675L>F  | Substitution | Nonsynonymous coding | 24% |
| MM12T | AMBN     | ameloblastin (enamel matrix protein)                                       | CCDS3543.1      | chr4_71472346-71472346_G_T    | 415D>Y  | Substitution | Nonsynonymous coding | 12% |
| MM12T | AMER3    | APC membrane recruitment protein 3                                         | CCDS2164.1      | chr2_131519883-131519883_G_T  | 80A>S   | Substitution | Nonsynonymous coding | 13% |
| MM12T | AMFR     | autocrine motility factor receptor, E3 ubiquitin protein ligase            | ENST00000314566 | chr16_56396202-56396202_T_C   | 269T>A  | Substitution | Nonsynonymous coding | 35% |
| MM12T | AMH      | anti-Mullerian hormone                                                     | CCDS12085.1     | chr19_2251576-2251576_C_T     | 435R>C  | Substitution | Nonsynonymous coding | 36% |
| MM12T | AMIGO1   | adhesion molecule with Ig-like domain 1                                    | CCDS30795.1     | chr1_110050345-110050345_C_T  | 397R>H  | Substitution | Nonsynonymous coding | 22% |
| MM12T | AMIGO3   | adhesion molecule with Ig-like domain 3                                    | CCDS33759.1     | chr3_49756430-49756430_G_A    | 157R>C  | Substitution | Nonsynonymous coding | 13% |
| MM12T | AMN      | amnion associated transmembrane protein                                    | CCDS9977.1      | chr14_103395095-103395095_G_A | 99G>D   | Substitution | Nonsynonymous coding | 38% |
| MM12T | AMOT     | angiomin                                                                   | CCDS48154.1     | chrX_112024240-112024240_G_A  | 783R>W  | Substitution | Nonsynonymous coding | 29% |
| MM12T | AMOT     | angiomin                                                                   | CCDS48154.1     | chrX_112024304-112024304_C_T  | 761M>I  | Substitution | Nonsynonymous coding | 13% |
| MM12T | AMOTL1   | angiomin like 1                                                            | CCDS44712.1     | chr11_94554844-94554844_G_A   | 424A>T  | Substitution | Nonsynonymous coding | 24% |
| MM12T | AMPD3    | adenosine monophosphate deaminase 3                                        | CCDS7802.1      | chr11_10523021-10523021_C_T   | 585R>C  | Substitution | Nonsynonymous coding | 29% |
| MM12T | AMPH     | amphiphysin                                                                | CCDS456.1       | chr7_38505073-38505073_G_A    | 248A>V  | Substitution | Nonsynonymous coding | 27% |
| MM12T | AMT      | aminomethyltransferase                                                     | CCDS2797.1      | chr3_49456476-49456476_C_A    | 269G>C  | Substitution | Nonsynonymous coding | 17% |
| MM12T | AMZ2     | archaelysin family metallopeptidase 2                                      | CCDS11674.1     | chr17_66246588-66246588_G_A   | 87R>H   | Substitution | Nonsynonymous coding | 11% |
| MM12T | ANAPC2   | anaphase promoting complex subunit 2                                       | CCDS7033.1      | chr9_140069837-140069837_C_T  | 703G>D  | Substitution | Nonsynonymous coding | 30% |
| MM12T | ANAPC5   | anaphase promoting complex subunit 5                                       | CCDS9220.1      | chr12_121790029-121790029_C_T | 39V>M   | Substitution | Nonsynonymous coding | 12% |
| MM12T | ANAPC7   | anaphase promoting complex subunit 7                                       | CCDS9145.2      | chr12_110824131-110824131_C_T | ISV+1>  | Substitution | Splice site donor    | 11% |
| MM12T | ANGPT4   | angiotensinogen 4                                                          | CCDS13009.1     | chr20_860486-860486_G_T       | 319F>L  | Substitution | Nonsynonymous coding | 28% |
| MM12T | ANGPT4   | angiotensinogen 4                                                          | CCDS13009.1     | chr20_865780-865780_C_T       | 259R>H  | Substitution | Nonsynonymous coding | 16% |
| MM12T | ANGPTL4  | angiotensinogen-like 4                                                     | CCDS12200.1     | chr19_8436182-8436182_G_A     | 272R>H  | Substitution | Nonsynonymous coding | 26% |
| MM12T | ANK1     | ankyrin 1, erythrocytic                                                    | CCDS6122.1      | chr8_41522337-41522337_G_A    | 69R>W   | Substitution | Nonsynonymous coding | 50% |
| MM12T | ANK3     | ankyrin 3, node of Ranvier (ankyrin G)                                     | CCDS7258.1      | chr10_61815519-61815519_C_T   | 4321C>Y | Substitution | Nonsynonymous coding | 19% |
| MM12T | ANK3     | ankyrin 3, node of Ranvier (ankyrin G)                                     | CCDS7258.1      | chr10_61829264-61829264_A_G   | 3792L>S | Substitution | Nonsynonymous coding | 45% |

|       |          |                                                     |                 |                               |         |              |                      |     |
|-------|----------|-----------------------------------------------------|-----------------|-------------------------------|---------|--------------|----------------------|-----|
| MM12T | ANK3     | ankyrin 3, node of Ranvier (ankyrin G)              | CCDS7258.1      | chr10_61836099-61836099_G_A   | 1514P>S | Substitution | Nonsynonymous coding | 18% |
| MM12T | ANK3     | ankyrin 3, node of Ranvier (ankyrin G)              | CCDS7258.1      | chr10_61932907-61932907_C_T   | 741G>E  | Substitution | Nonsynonymous coding | 39% |
| MM12T | ANKAR    | ankyrin and armadillo repeat containing             | CCDS33351.1     | chr2_190593419-190593419_G_A  | 951S>N  | Substitution | Nonsynonymous coding | 15% |
| MM12T | ANKDD1A  | ankyrin repeat and death domain containing 1A       | CCDS10197.2     | chr15_65209705-65209705_C_T   | 87R>C   | Substitution | Nonsynonymous coding | 32% |
| MM12T | ANKDD1B  | ankyrin repeat and death domain containing 1B       | ENST00000344149 | chr5_74948998-74948998_G_A    | 216R>K  | Substitution | Nonsynonymous coding | 20% |
| MM12T | ANKDD1B  | ankyrin repeat and death domain containing 1B       | ENST00000344149 | chr5_74955142-74955142_G_A    | 283R>H  | Substitution | Nonsynonymous coding | 31% |
| MM12T | ANKK1    | ankyrin repeat and kinase domain containing 1       | CCDS44734.1     | chr11_113258739-113258739_C_T | 45R>W   | Substitution | Nonsynonymous coding | 19% |
| MM12T | ANKMY1   | ankyrin repeat and MYND domain containing 1         | CCDS2536.1      | chr2_241465178-241465178_C_A  | 331S>I  | Substitution | Nonsynonymous coding | 40% |
| MM12T | ANKRD11  | ankyrin repeat domain 11                            | CCDS32513.1     | chr16_89346682-89346682_C_T   | 2090A>T | Substitution | Nonsynonymous coding | 36% |
| MM12T | ANKRD11  | ankyrin repeat domain 11                            | CCDS32513.1     | chr16_89350738-89350738_G_A   | 738R>C  | Substitution | Nonsynonymous coding | 13% |
| MM12T | ANKRD12  | ankyrin repeat domain 12                            | CCDS11843.1     | chr18_9255948-9255948_A_      | NA      | Deletion     | Frameshift           | 34% |
| MM12T | ANKRD12  | ankyrin repeat domain 12                            | CCDS11843.1     | chr18_9256062-9256062_A_      | NA      | Deletion     | Frameshift           | 31% |
| MM12T | ANKRD13A | ankyrin repeat domain 13A                           | CCDS9140.1      | chr12_110457001-110457001_G_A | 201R>H  | Substitution | Nonsynonymous coding | 33% |
| MM12T | ANKRD13D | ankyrin repeat domain 13 family, member D           | CCDS31616.1     | chr11_67059154-67059154_C_A   | 73L>I   | Substitution | Nonsynonymous coding | 11% |
| MM12T | ANKRD17  | ankyrin repeat domain 17                            | CCDS34004.1     | chr4_73968230-73968230_G_A    | 1479A>V | Substitution | Nonsynonymous coding | 33% |
| MM12T | ANKRD2   | ankyrin repeat domain 2 (stretch responsive muscle) | CCDS7466.1      | chr10_99338081-99338081_C_T   | 119R>W  | Substitution | Nonsynonymous coding | 11% |
| MM12T | ANKRD23  | ankyrin repeat domain 23                            | CCDS2027.1      | chr2_97505740-97505740_C_A    | 239Q>H  | Substitution | Nonsynonymous coding | 32% |
| MM12T | ANKRD24  | ankyrin repeat domain 24                            | CCDS45925.1     | chr19_4222673-4222673_G_T     | 1060E>X | Substitution | Nonsense             | 14% |
| MM12T | ANKRD26  | ankyrin repeat domain 26                            | CCDS41499.1     | chr10_27326148-27326148_C_A   | 888E>D  | Substitution | Nonsynonymous coding | 55% |
| MM12T | ANKRD27  | ankyrin repeat domain 27 (VPS9 domain)              | CCDS32986.1     | chr19_33089107-33089107_G_A   | 1033P>S | Substitution | Nonsynonymous coding | 34% |
| MM12T | ANKRD27  | ankyrin repeat domain 27 (VPS9 domain)              | CCDS32986.1     | chr19_33106643-33106643_G_A   | 699A>V  | Substitution | Nonsynonymous coding | 15% |
| MM12T | ANKRD27  | ankyrin repeat domain 27 (VPS9 domain)              | CCDS32986.1     | chr19_33130321-33130321_T_C   | 353T>A  | Substitution | Nonsynonymous coding | 30% |
| MM12T | ANKRD27  | ankyrin repeat domain 27 (VPS9 domain)              | CCDS32986.1     | chr19_33137429-33137429_A_C   | 102N>K  | Substitution | Nonsynonymous coding | 33% |
| MM12T | ANKRD33  | ankyrin repeat domain 33                            | CCDS44892.1     | chr12_52283300-52283300_T_C   | ISV+4>  | Substitution | Splice site donor    | 47% |
| MM12T | ANKRD34B | ankyrin repeat domain 34B                           | CCDS34194.1     | chr5_79855012-79855012_T_C    | 276E>G  | Substitution | Nonsynonymous coding | 30% |
| MM12T | ANKRD35  | ankyrin repeat domain 35                            | CCDS919.1       | chr1_145562930-145562930_C_T  | 873A>V  | Substitution | Nonsynonymous coding | 33% |
| MM12T | ANKRD44  | ankyrin repeat domain 44                            | CCDS33355.1     | chr2_197990118-197990118_C_T  | 154W>X  | Substitution | Nonsense             | 25% |
| MM12T | ANKRD50  | ankyrin repeat domain 50                            | CCDS34060.1     | chr4_125591940-125591940_C_T  | 831R>H  | Substitution | Nonsynonymous coding | 10% |
| MM12T | ANKRD52  | ankyrin repeat domain 52                            | CCDS44920.1     | chr12_56642565-56642565_C_T   | 561G>D  | Substitution | Nonsynonymous coding | 30% |
| MM12T | ANKRD60  | ankyrin repeat domain 60                            | ENST00000457363 | chr20_56803414-56803414_C_T   | 99R>Q   | Substitution | Nonsynonymous coding | 30% |
| MM12T | ANKRD60  | ankyrin repeat domain 60                            | ENST00000457363 | chr20_56803471-56803471_G_A   | 80P>L   | Substitution | Nonsynonymous coding | 36% |
| MM12T | ANKRD62  | ankyrin repeat domain 62                            | ENST00000314074 | chr18_12094158-12094158_G_A   | 34A>T   | Substitution | Nonsynonymous coding | 33% |

|       |             |                                                                 |                 |                              |         |              |                      |     |
|-------|-------------|-----------------------------------------------------------------|-----------------|------------------------------|---------|--------------|----------------------|-----|
| MM12T | ANKS1A      | ankyrin repeat and sterile alpha motif domain containing 1A     | CCDS4798.1      | chr6_35051200-35051200_A_G   | 972T>A  | Substitution | Nonsynonymous coding | 20% |
| MM12T | ANKS6       | ankyrin repeat and sterile alpha motif domain containing 6      | CCDS43856.1     | chr9_101530476-101530476_C_T | 677G>R  | Substitution | Nonsynonymous coding | 35% |
| MM12T | ANKS6       | ankyrin repeat and sterile alpha motif domain containing 6      | CCDS43856.1     | chr9_101540676-101540676_G_A | 467R>X  | Substitution | Nonsense             | 34% |
| MM12T | ANKZF1      | ankyrin repeat and zinc finger domain containing 1              | CCDS42821.1     | chr2_220098123-220098123_C_A | 263L>M  | Substitution | Nonsynonymous coding | 41% |
| MM12T | ANKZF1      | ankyrin repeat and zinc finger domain containing 1              | CCDS42821.1     | chr2_220098551-220098551_G_A | 312A>T  | Substitution | Nonsynonymous coding | 14% |
| MM12T | ANO1        | anoctamin 1, calcium activated chloride channel                 | CCDS44663.1     | chr11_69995812-69995812_G_A  | ISV-4>  | Substitution | Splice site acceptor | 11% |
| MM12T | ANO5        | anoctamin 5                                                     | CCDS31444.1     | chr11_22239808-22239808_A_T  | 52N>I   | Substitution | Nonsynonymous coding | 23% |
| MM12T | ANO6        | anoctamin 6                                                     | CCDS31782.1     | chr12_45822911-45822911_T_A  | 850F>L  | Substitution | Nonsynonymous coding | 14% |
| MM12T | ANO9        | anoctamin 9                                                     | CCDS31326.1     | chr11_418734-418734_C_T      | 706V>I  | Substitution | Nonsynonymous coding | 25% |
| MM12T | ANO9        | anoctamin 9                                                     | CCDS31326.1     | chr11_418941-418941_C_A      | 661K>N  | Substitution | Nonsynonymous coding | 30% |
| MM12T | ANPEP       | alanyl (membrane) aminopeptidase                                | CCDS10356.1     | chr15_90334299-90334299_C_T  | 852D>N  | Substitution | Nonsynonymous coding | 11% |
| MM12T | ANXA1       | annexin A1                                                      | CCDS6645.1      | chr9_75780077-75780077_G_A   | 220V>M  | Substitution | Nonsynonymous coding | 10% |
| MM12T | AP001631.10 | -                                                               | ENST00000411787 | chr21_44581295-44581295_G_T  | 23S>Y   | Substitution | Nonsynonymous coding | 25% |
| MM12T | AP1B1       | adaptor-related protein complex 1, beta 1 subunit               | ENST00000415756 | chr22_29747363-29747363_C_T  | 30G>D   | Substitution | Nonsynonymous coding | 14% |
| MM12T | AP1G2       | adaptor-related protein complex 1, gamma 2 subunit              | CCDS9602.1      | chr14_24032654-24032654_C    | NA      | Insertion    | Frameshift           | 31% |
| MM12T | AP1G2       | adaptor-related protein complex 1, gamma 2 subunit              | CCDS9602.1      | chr14_24035494-24035494_C_T  | 155R>H  | Substitution | Nonsynonymous coding | 27% |
| MM12T | AP2A1       | adaptor-related protein complex 2, alpha 1 subunit              | CCDS46148.1     | chr19_50309957-50309957_G_A  | 959R>H  | Substitution | Nonsynonymous coding | 12% |
| MM12T | AP3B2       | adaptor-related protein complex 3, beta 2 subunit               | CCDS45331.1     | chr15_83350280-83350280_C_T  | 138R>H  | Substitution | Nonsynonymous coding | 26% |
| MM12T | AP3S1       | adaptor-related protein complex 3, sigma 1 subunit              | CCDS4123.1      | chr5_115238605-115238605_G_A | 123M>I  | Substitution | Nonsynonymous coding | 25% |
| MM12T | AP4B1       | adaptor-related protein complex 4, beta 1 subunit               | CCDS865.1       | chr1_114447238-114447238_C_A | 34Q>H   | Substitution | Nonsynonymous coding | 11% |
| MM12T | AP4E1       | adaptor-related protein complex 4, epsilon 1 subunit            | CCDS32240.1     | chr15_51221214-51221214_T_C  | 184V>A  | Substitution | Nonsynonymous coding | 40% |
| MM12T | AP5Z1       | adaptor-related protein complex 5, zeta 1 subunit               | CCDS47528.1     | chr7_4824622-4824622_C_T     | 292R>W  | Substitution | Nonsynonymous coding | 30% |
| MM12T | APBA3       | amyloid beta (A4) precursor protein-binding, family A, member 3 | CCDS12110.1     | chr19_3753849-3753849_G_A    | 309R>W  | Substitution | Nonsynonymous coding | 27% |
| MM12T | APBB2       | amyloid beta (A4) precursor protein-binding, family B, member 2 | CCDS43224.1     | chr4_40824034-40824034_G_A   | 633R>X  | Substitution | Nonsense             | 17% |
| MM12T | APBB3       | amyloid beta (A4) precursor protein-binding, family B, member 3 | CCDS4227.1      | chr5_139941969-139941969_C_T | 156R>Q  | Substitution | Nonsynonymous coding | 24% |
| MM12T | APC         | adenomatous polyposis coli                                      | CCDS4107.1      | chr5_112154998-112154998_G_A | 423W>X  | Substitution | Nonsense             | 17% |
| MM12T | APC         | adenomatous polyposis coli                                      | CCDS4107.1      | chr5_112175639-112175639_C_T | 1450R>X | Substitution | Nonsense             | 40% |
| MM12T | APC2        | adenomatous polyposis coli 2                                    | CCDS12068.1     | chr19_1466287-1466287_C_T    | 996S>L  | Substitution | Nonsynonymous coding | 16% |
| MM12T | APC2        | adenomatous polyposis coli 2                                    | CCDS12068.1     | chr19_1468686-1468686_G_A    | 1796V>I | Substitution | Nonsynonymous coding | 33% |
| MM12T | APLN        | apelin                                                          | ENST00000427399 | chrX_128781732-128781732_G_A | 97A>V   | Substitution | Nonsynonymous coding | 15% |
| MM12T | APLNR       | apelin receptor                                                 | CCDS7950.1      | chr11_57003416-57003416_C_T  | 355G>S  | Substitution | Nonsynonymous coding | 27% |
| MM12T | APLP1       | amyloid beta (A4) precursor-like protein 1                      | CCDS32997.1     | chr19_36360590-36360590_G_A  | 57A>T   | Substitution | Nonsynonymous coding | 29% |



|       |           |                                                                                      |                 |                               |         |              |                      |     |
|-------|-----------|--------------------------------------------------------------------------------------|-----------------|-------------------------------|---------|--------------|----------------------|-----|
| MM12T | APOA4     | apolipoprotein A-IV                                                                  | CCDS1681.1      | chr11_116692310-116692310_C_T | 155R>H  | Substitution | Nonsynonymous coding | 36% |
| MM12T | APOB      | apolipoprotein B (including Ag(x) antigen)                                           | CCDS1703.1      | chr2_21233757-21233757_C_T    | 1995D>N | Substitution | Nonsynonymous coding | 12% |
| MM12T | APOBEC1   | apolipoprotein B mRNA editing enzyme, catalytic polypeptide 1                        | CCDS8579.1      | chr12_7803644-7803644_G_A     | 179A>V  | Substitution | Nonsynonymous coding | 39% |
| MM12T | APOBEC3D  | apolipoprotein B mRNA editing enzyme, catalytic polypeptide-like 3D                  | CCDS46709.1     | chr22_39421265-39421265_G_A   | 134R>H  | Substitution | Nonsynonymous coding | 11% |
| MM12T | APOBEC4   | apolipoprotein B mRNA editing enzyme, catalytic polypeptide-like 4 (putative)        | CCDS1358.1      | chr1_183617843-183617843_G_A  | 25S>F   | Substitution | Nonsynonymous coding | 36% |
| MM12T | APOBR     | apolipoprotein B receptor                                                            | NM_018690       | chr16_28507078-28507078_C_A   | 239P>H  | Substitution | Nonsynonymous coding | 36% |
| MM12T | APOBR     | apolipoprotein B receptor                                                            | NM_018690       | chr16_28509481-28509481_G_A   | 1003R>H | Substitution | Nonsynonymous coding | 37% |
| MM12T | APOBR     | apolipoprotein B receptor                                                            | NM_018690       | chr16_28509674-28509674_G_T   | ISV+4>  | Substitution | Splice site donor    | 30% |
| MM12T | APOE      | apolipoprotein E                                                                     | CCDS12647.1     | chr19_45412041-45412041_G_A   | 163R>H  | Substitution | Nonsynonymous coding | 29% |
| MM12T | APOL5     | apolipoprotein L, 5                                                                  | CCDS13920.1     | chr22_36122590-36122590_G_A   | 159A>T  | Substitution | Nonsynonymous coding | 17% |
| MM12T | APRT      | adenine phosphoribosyltransferase                                                    | CCDS32511.1     | chr16_88878234-88878234_A_G   | 25V>A   | Substitution | Nonsynonymous coding | 28% |
| MM12T | AQP2      | aquaporin 2 (collecting duct)                                                        | CCDS8792.1      | chr12_50348441-50348441_C_A   | 185P>H  | Substitution | Nonsynonymous coding | 27% |
| MM12T | AQP5      | aquaporin 5                                                                          | CCDS8793.1      | chr12_50357353-50357353_G_A   | 148A>T  | Substitution | Nonsynonymous coding | 27% |
| MM12T | AQP8      | aquaporin 8                                                                          | CCDS10626.1     | chr16_25228522-25228522_G_T   | 6A>S    | Substitution | Nonsynonymous coding | 12% |
| MM12T | AR        | androgen receptor                                                                    | CCDS14387.1     | chrX_66942750-66942750_C_T    | 844A>V  | Substitution | Nonsynonymous coding | 19% |
| MM12T | ARAP1     | ArfGAP with RhoGAP domain, ankyrin repeat and PH domain 1                            | CCDS41687.1     | chr11_72409075-72409075_C_T   | 873G>D  | Substitution | Nonsynonymous coding | 26% |
| MM12T | ARAP1     | ArfGAP with RhoGAP domain, ankyrin repeat and PH domain 1                            | CCDS41687.1     | chr11_72437890-72437890_G_A   | 95P>L   | Substitution | Nonsynonymous coding | 14% |
| MM12T | ARAP3     | ArfGAP with RhoGAP domain, ankyrin repeat and PH domain 3                            | CCDS4266.1      | chr5_141050147-141050147_C_A  | 680S>I  | Substitution | Nonsynonymous coding | 31% |
| MM12T | ARCN1     | archain 1                                                                            | CCDS8400.1      | chr11_118463431-118463431_C_T | 331P>L  | Substitution | Nonsynonymous coding | 11% |
| MM12T | ARFGAP1   | ADP-ribosylation factor GTPase activating protein 1                                  | ENST00000370275 | chr20_61917513-61917513_G_A   | 339R>H  | Substitution | Nonsynonymous coding | 31% |
| MM12T | ARFGEF2   | ADP-ribosylation factor guanine nucleotide-exchange factor 2 (brefeldin A-inhibited) | CCDS13411.1     | chr20_47607573-47607573_A_G   | ISV-4>  | Substitution | Splice site acceptor | 45% |
| MM12T | ARFRP1    | ADP-ribosylation factor related protein 1                                            | ENST00000303260 | chr20_62337070-62337070_C_A   | 101D>Y  | Substitution | Nonsynonymous coding | 11% |
| MM12T | ARHGAP1   | Rho GTPase activating protein 1                                                      | CCDS7922.1      | chr11_46700940-46700940_C_T   | 369R>H  | Substitution | Nonsynonymous coding | 22% |
| MM12T | ARHGAP10  | Rho GTPase activating protein 10                                                     | CCDS34075.1     | chr4_148944432-148944432_G_A  | 579D>N  | Substitution | Nonsynonymous coding | 18% |
| MM12T | ARHGAP11A | Rho GTPase activating protein 11A                                                    | CCDS10028.1     | chr15_32929599-32929599_C_A   | 875S>R  | Substitution | Nonsynonymous coding | 14% |
| MM12T | ARHGAP19  | Rho GTPase activating protein 19                                                     | CCDS7454.2      | chr10_99019348-99019348_A_T   | 217N>K  | Substitution | Nonsynonymous coding | 12% |
| MM12T | ARHGAP25  | Rho GTPase activating protein 25                                                     | CCDS46312.1     | chr2_69002329-69002329_C_T    | 6S>L    | Substitution | Nonsynonymous coding | 31% |
| MM12T | ARHGAP25  | Rho GTPase activating protein 25                                                     | CCDS33214.1     | chr2_69049745-69049745_C_T    | 491R>C  | Substitution | Nonsynonymous coding | 24% |
| MM12T | ARHGAP30  | Rho GTPase activating protein 30                                                     | CCDS30918.1     | chr1_161022229-161022229_C_T  | ISV+1>  | Substitution | Splice site donor    | 36% |
| MM12T | ARHGAP30  | Rho GTPase activating protein 30                                                     | CCDS30918.1     | chr1_161021311-161021311_C_A  | 405E>X  | Substitution | Nonsense             | 30% |
| MM12T | ARHGAP31  | Rho GTPase activating protein 31                                                     | CCDS43135.1     | chr3_119133892-119133892_G_A  | 1039S>N | Substitution | Nonsynonymous coding | 31% |
| MM12T | ARHGAP31  | Rho GTPase activating protein 31                                                     | CCDS43135.1     | chr3_119134692-119134692_C_T  | 1306Q>X | Substitution | Nonsense             | 11% |

|       |           |                                                      |                 |                               |         |              |                      |     |
|-------|-----------|------------------------------------------------------|-----------------|-------------------------------|---------|--------------|----------------------|-----|
| MM12T | ARHGAP32  | Rho GTPase activating protein 32                     | CCDS44769.1     | chr11_128842868-128842868_G_A | 1164A>V | Substitution | Nonsynonymous coding | 15% |
| MM12T | ARHGAP33  | Rho GTPase activating protein 33                     | ENST00000007510 | chr19_36277338-36277338_C_T   | 656R>W  | Substitution | Nonsynonymous coding | 48% |
| MM12T | ARHGAP35  | Rho GTPase activating protein 35                     | CCDS46127.1     | chr19_47422965-47422965_C_T   | 345P>S  | Substitution | Nonsynonymous coding | 17% |
| MM12T | ARHGAP36  | Rho GTPase activating protein 36                     | CCDS14628.1     | chrX_130217932-130217932_C_T  | 182R>C  | Substitution | Nonsynonymous coding | 63% |
| MM12T | ARHGAP39  | Rho GTPase activating protein 39                     | CCDS34971.1     | chr8_145756217-145756217_G_A  | 1007P>S | Substitution | Nonsynonymous coding | 45% |
| MM12T | ARHGAP40  | Rho GTPase activating protein 40                     | NM_001164431    | chr20_37266404-37266404_G_A   | 334V>I  | Substitution | Nonsynonymous coding | 10% |
| MM12T | ARHGAP40  | Rho GTPase activating protein 40                     | NM_001164431    | chr20_37274763-37274763_C_T   | 547A>V  | Substitution | Nonsynonymous coding | 31% |
| MM12T | ARHGAP5   | Rho GTPase activating protein 5                      | CCDS32062.1     | chr14_32563048-32563048_T     | NA      | Insertion    | Frameshift           | 27% |
| MM12T | ARHGAP5   | Rho GTPase activating protein 5                      | CCDS32062.1     | chr14_32563413-32563413_G_A   | 1180A>T | Substitution | Nonsynonymous coding | 21% |
| MM12T | ARHGAP6   | Rho GTPase activating protein 6                      | CCDS14140.1     | chrX_11157302-11157302_C_A    | 869R>I  | Substitution | Nonsynonymous coding | 26% |
| MM12T | ARHGAP6   | Rho GTPase activating protein 6                      | CCDS14140.1     | chrX_11204397-11204397_G_T    | 411P>H  | Substitution | Nonsynonymous coding | 11% |
| MM12T | ARHGEF10  | Rho guanine nucleotide exchange factor (GEF) 10      | CCDS34794.1     | chr8_1833845-1833845_C_T      | 385P>L  | Substitution | Nonsynonymous coding | 25% |
| MM12T | ARHGEF10L | Rho guanine nucleotide exchange factor (GEF) 10-like | CCDS182.1       | chr1_18014167-18014167_C_T    | 1037R>C | Substitution | Nonsynonymous coding | 41% |
| MM12T | ARHGEF10L | Rho guanine nucleotide exchange factor (GEF) 10-like | CCDS182.1       | chr1_17907130-17907130_A_G    | ISV+3>  | Substitution | Splice site donor    | 36% |
| MM12T | ARHGEF11  | Rho guanine nucleotide exchange factor (GEF) 11      | CCDS1163.1      | chr1_156917153-156917153_G_A  | 811P>S  | Substitution | Nonsynonymous coding | 11% |
| MM12T | ARHGEF11  | Rho guanine nucleotide exchange factor (GEF) 11      | CCDS1163.1      | chr1_156931470-156931470_G_A  | 413A>V  | Substitution | Nonsynonymous coding | 20% |
| MM12T | ARHGEF11  | Rho guanine nucleotide exchange factor (GEF) 11      | CCDS1163.1      | chr1_156955955-156955955_G_T  | 15L>M   | Substitution | Nonsynonymous coding | 24% |
| MM12T | ARHGEF17  | Rho guanine nucleotide exchange factor (GEF) 17      | CCDS8221.1      | chr11_73021058-73021058_C_T   | 459R>W  | Substitution | Nonsynonymous coding | 37% |
| MM12T | ARHGEF17  | Rho guanine nucleotide exchange factor (GEF) 17      | CCDS8221.1      | chr11_73073191-73073191_G_A   | 1534R>H | Substitution | Nonsynonymous coding | 10% |
| MM12T | ARHGEF18  | Rho/Rac guanine nucleotide exchange factor (GEF) 18  | CCDS45946.1     | chr19_7532428-7532428_G_A     | 925R>H  | Substitution | Nonsynonymous coding | 13% |
| MM12T | ARHGEF19  | Rho guanine nucleotide exchange factor (GEF) 19      | CCDS170.1       | chr1_16532780-16532780_G_A    | 398A>V  | Substitution | Nonsynonymous coding | 37% |
| MM12T | ARHGEF3   | Rho guanine nucleotide exchange factor (GEF) 3       | CCDS46854.1     | chr3_56779397-56779397_C_A    | 268D>Y  | Substitution | Nonsynonymous coding | 25% |
| MM12T | ARHGEF3   | Rho guanine nucleotide exchange factor (GEF) 3       | CCDS46854.1     | chr3_56807811-56807811_G_A    | 76R>X   | Substitution | Nonsense             | 29% |
| MM12T | ARHGEF37  | Rho guanine nucleotide exchange factor (GEF) 37      | CCDS43385.1     | chr5_148999959-148999959_C_A  | 313P>T  | Substitution | Nonsynonymous coding | 41% |
| MM12T | ARHGEF38  | Rho guanine nucleotide exchange factor (GEF) 38      | ENST00000420470 | chr4_106566370-106566370_G_A  | 34G>S   | Substitution | Nonsynonymous coding | 15% |
| MM12T | ARHGEF4   | Rho guanine nucleotide exchange factor (GEF) 4       | ENST00000409359 | chr2_131672915-131672915_C_G  | 136P>A  | Substitution | Nonsynonymous coding | 33% |
| MM12T | ARHGEF7   | Rho guanine nucleotide exchange factor (GEF) 7       | CCDS45068.1     | chr13_111862350-111862350_G_C | ISV+1>  | Substitution | Splice site donor    | 29% |
| MM12T | ARHGEF9   | Cdc42 guanine nucleotide exchange factor (GEF) 9     | CCDS35315.1     | chrX_62863892-62863892_G_A    | 446A>V  | Substitution | Nonsynonymous coding | 24% |
| MM12T | ARID1A    | AT rich interactive domain 1A (SWI-like)             | CCDS285.1       | chr1_27092812-27092812_G_A    | 945G>R  | Substitution | Nonsynonymous coding | 13% |
| MM12T | ARID1B    | AT rich interactive domain 1B (SWI-like)             | CCDS5251.1      | chr6_157528243-157528243_C_T  | 1972R>X | Substitution | Nonsense             | 23% |
| MM12T | ARID4B    | AT rich interactive domain 4B (RBP1-like)            | CCDS31061.1     | chr1_235344908-235344908_G_T  | 1109P>H | Substitution | Nonsynonymous coding | 17% |
| MM12T | ARID5A    | AT rich interactive domain 5A (MRF1-like)            | CCDS33251.1     | chr2_97215934-97215934_C_T    | 108R>C  | Substitution | Nonsynonymous coding | 38% |

|       |        |                                                            |             |                               |        |              |                      |     |
|-------|--------|------------------------------------------------------------|-------------|-------------------------------|--------|--------------|----------------------|-----|
| MM12T | ARID5A | AT rich interactive domain 5A (MRF1-like)                  | CCDS33251.1 | chr2_97216960-97216960_C_T    | 232A>V | Substitution | Nonsynonymous coding | 12% |
| MM12T | ARIH2  | ariadne homolog 2 (Drosophila)                             | CCDS2780.1  | chr3_49020686-49020686_G_A    | 489D>N | Substitution | Nonsynonymous coding | 35% |
| MM12T | ARL1   | ADP-ribosylation factor-like 1                             | CCDS44958.1 | chr12_101790198-101790198_C_A | 165G>V | Substitution | Nonsynonymous coding | 18% |
| MM12T | ARL11  | ADP-ribosylation factor-like 11                            | CCDS9419.1  | chr13_50204958-50204958_G_T   | 125E>D | Substitution | Nonsynonymous coding | 16% |
| MM12T | ARL13B | ADP-ribosylation factor-like 13B                           | CCDS2925.1  | chr3_93754216-93754216_C_T    | 141A>V | Substitution | Nonsynonymous coding | 13% |
| MM12T | ARMC4  | armadillo repeat containing 4                              | CCDS7157.1  | chr10_28228838-28228838_C_T   | 695M>I | Substitution | Nonsynonymous coding | 12% |
| MM12T | ARMC7  | armadillo repeat containing 7                              | CCDS11714.1 | chr17_73124952-73124952_C_T   | 139T>M | Substitution | Nonsynonymous coding | 34% |
| MM12T | ARMCX5 | armadillo repeat containing, X-linked 5                    | CCDS14500.1 | chrX_101857581-101857581_G_A  | 171C>Y | Substitution | Nonsynonymous coding | 21% |
| MM12T | ARPC1A | actin related protein 2/3 complex, subunit 1A, 41kDa       | CCDS5660.1  | chr7_98961185-98961185_G_A    | 335V>M | Substitution | Nonsynonymous coding | 38% |
| MM12T | ARPC1B | actin related protein 2/3 complex, subunit 1B, 41kDa       | CCDS5661.1  | chr7_98985689-98985689_G_A    | 66R>H  | Substitution | Nonsynonymous coding | 18% |
| MM12T | ARPC5L | actin related protein 2/3 complex, subunit 5-like          | CCDS6859.1  | chr9_127636005-127636005_C_T  | 62R>W  | Substitution | Nonsynonymous coding | 31% |
| MM12T | ARPP21 | cAMP-regulated phosphoprotein, 21kDa                       | CCDS2661.1  | chr3_35748578-35748578_G_A    | ISV+4> | Substitution | Splice site donor    | 30% |
| MM12T | ARRB1  | arrestin, beta 1                                           | CCDS44684.1 | chr11_75001070-75001070_C_T   | 12A>T  | Substitution | Nonsynonymous coding | 24% |
| MM12T | ARRDC1 | arrestin domain containing 1                               | CCDS7049.1  | chr9_140508108-140508108_G_A  | 108V>M | Substitution | Nonsynonymous coding | 28% |
| MM12T | ARSB   | arylsulfatase B                                            | CCDS43334.1 | chr5_78111924-78111924_G_T    | 409C>X | Substitution | Nonsense             | 20% |
| MM12T | ARSD   | arylsulfatase D                                            | CCDS35196.1 | chrX_2825619-2825619_G_A      | 492A>V | Substitution | Nonsynonymous coding | 17% |
| MM12T | ARSI   | arylsulfatase family, member I                             | CCDS34275.1 | chr5_149677471-149677471_C_T  | 339R>Q | Substitution | Nonsynonymous coding | 11% |
| MM12T | ARVCF  | armadillo repeat gene deleted in velocardiofacial syndrome | CCDS13771.1 | chr22_19960652-19960652_C_T   | 810V>M | Substitution | Nonsynonymous coding | 34% |
| MM12T | ARVCF  | armadillo repeat gene deleted in velocardiofacial syndrome | CCDS13771.1 | chr22_19966469-19966469_G_A   | 511R>W | Substitution | Nonsynonymous coding | 17% |
| MM12T | ARVCF  | armadillo repeat gene deleted in velocardiofacial syndrome | CCDS13771.1 | chr22_19968887-19968887_C_T   | 248R>H | Substitution | Nonsynonymous coding | 18% |
| MM12T | ARX    | aristaless related homeobox                                | CCDS14215.1 | chrX_25022849-25022849_C_T    | 543A>T | Substitution | Nonsynonymous coding | 11% |
| MM12T | ASAP1  | ArfGAP with SH3 domain, ankyrin repeat and PH domain 1     | CCDS6362.1  | chr8_131073147-131073147_G_T  | 957P>H | Substitution | Nonsynonymous coding | 28% |
| MM12T | ASAP2  | ArfGAP with SH3 domain, ankyrin repeat and PH domain 2     | CCDS1661.1  | chr2_9463282-9463282_C_T      | 168A>V | Substitution | Nonsynonymous coding | 12% |
| MM12T | ASB16  | ankyrin repeat and SOCS box containing 16                  | CCDS11478.1 | chr17_42254285-42254285_C_T   | 250A>V | Substitution | Nonsynonymous coding | 11% |
| MM12T | ASB18  | ankyrin repeat and SOCS box containing 18                  | CCDS46548.1 | chr2_237123016-237123016_C_T  | 364A>T | Substitution | Nonsynonymous coding | 21% |
| MM12T | ASB4   | ankyrin repeat and SOCS box containing 4                   | CCDS5641.1  | chr7_95157275-95157275_C_T    | 213A>V | Substitution | Nonsynonymous coding | 37% |
| MM12T | ASB6   | ankyrin repeat and SOCS box containing 6                   | CCDS6924.1  | chr9_132400416-132400416_G_T  | 307L>I | Substitution | Nonsynonymous coding | 30% |
| MM12T | ASB7   | ankyrin repeat and SOCS box containing 7                   | CCDS10387.1 | chr15_101169983-101169983_C_T | 185R>X | Substitution | Nonsense             | 11% |
| MM12T | ASCC2  | activating signal cointegrator 1 complex subunit 2         | CCDS13869.1 | chr22_30197067-30197067_G_A   | 534T>M | Substitution | Nonsynonymous coding | 18% |
| MM12T | ASCC3  | activating signal cointegrator 1 complex subunit 3         | CCDS5046.1  | chr6_101109882-101109882_T_   | NA     | Deletion     | Frameshift           | 14% |
| MM12T | ASCL1  | achaete-scute complex homolog 1 (Drosophila)               | CCDS31886.1 | chr12_103352525-103352525_G_A | 168R>H | Substitution | Nonsynonymous coding | 18% |
| MM12T | ASF1A  | ASF1 anti-silencing function 1 homolog A (S. cerevisiae)   | CCDS47469.1 | chr6_119228600-119228600_G_A  | 146V>I | Substitution | Nonsynonymous coding | 20% |

|       |         |                                                                     |                 |                               |         |              |                      |     |
|-------|---------|---------------------------------------------------------------------|-----------------|-------------------------------|---------|--------------|----------------------|-----|
| MM12T | ASF1B   | ASF1 anti-silencing function 1 homolog B (S. cerevisiae)            | CCDS12306.1     | chr19_14247162-14247162_T_C   | 36D>G   | Substitution | Nonsynonymous coding | 10% |
| MM12T | ASH1L   | ash1 (absent, small, or homeotic)-like (Drosophila)                 | CCDS1113.2      | chr1_155429621-155429621_T_C  | 1685K>E | Substitution | Nonsynonymous coding | 32% |
| MM12T | ASH1L   | ash1 (absent, small, or homeotic)-like (Drosophila)                 | CCDS1113.2      | chr1_155449035-155449035_C_T  | 1209S>N | Substitution | Nonsynonymous coding | 29% |
| MM12T | ASIC1   | acid-sensing (proton-gated) ion channel 1                           | CCDS8796.1      | chr12_50472298-50472298_G_A   | 311R>H  | Substitution | Nonsynonymous coding | 34% |
| MM12T | ASIC3   | acid-sensing (proton-gated) ion channel 3                           | CCDS5915.1      | chr7_150749251-150749251_A_G  | ISV-2>  | Substitution | Splice site acceptor | 32% |
| MM12T | ASIC4   | acid-sensing (proton-gated) ion channel family member 4             | CCDS33384.1     | chr2_220379541-220379541_C_T  | 159A>V  | Substitution | Nonsynonymous coding | 10% |
| MM12T | ASPH    | aspartate beta-hydroxylase                                          | CCDS34898.1     | chr8_62489337-62489337_C_A    | 381K>N  | Substitution | Nonsynonymous coding | 25% |
| MM12T | ASPHD2  | aspartate beta-hydroxylase domain containing 2                      | CCDS13834.2     | chr22_26838512-26838512_C_T   | 325S>F  | Substitution | Nonsynonymous coding | 25% |
| MM12T | ASPN    | asporin                                                             | CCDS6697.1      | chr9_95227296-95227296_G_T    | 206P>H  | Substitution | Nonsynonymous coding | 19% |
| MM12T | ASPSCR1 | alveolar soft part sarcoma chromosome region, candidate 1           | CCDS11796.1     | chr17_79941524-79941524_C_T   | 85R>C   | Substitution | Nonsynonymous coding | 26% |
| MM12T | ASPSCR1 | alveolar soft part sarcoma chromosome region, candidate 1           | CCDS11796.1     | chr17_79954495-79954495_G_A   | 236A>T  | Substitution | Nonsynonymous coding | 21% |
| MM12T | ASTN1   | astrotactin 1                                                       | CCDS1319.1      | chr1_177001804-177001804_C_T  | 218R>H  | Substitution | Nonsynonymous coding | 16% |
| MM12T | ASTN2   | astrotactin 2                                                       | CCDS48009.1     | chr9_119188319-119188319_G_T  | 1273C>X | Substitution | Nonsense             | 31% |
| MM12T | ASXL1   | additional sex combs like 1 (Drosophila)                            | CCDS13201.1     | chr20_31022231-31022231_G_A   | ISV-4>  | Substitution | Splice site acceptor | 31% |
| MM12T | ASXL3   | additional sex combs like 3 (Drosophila)                            | CCDS45847.1     | chr18_31324170-31324170_C_A   | 1453P>H | Substitution | Nonsynonymous coding | 33% |
| MM12T | ATAD2B  | ATPase family, AAA domain containing 2B                             | CCDS46227.1     | chr2_24046305-24046305_C_T    | 652D>N  | Substitution | Nonsynonymous coding | 15% |
| MM12T | ATE1    | arginyltransferase 1                                                | CCDS31299.1     | chr10_123600655-123600655_A_G | 367Y>H  | Substitution | Nonsynonymous coding | 24% |
| MM12T | ATE1    | arginyltransferase 1                                                | CCDS31299.1     | chr10_123658406-123658406_A_G | 298Y>H  | Substitution | Nonsynonymous coding | 11% |
| MM12T | ATF7    | activating transcription factor 7                                   | CCDS44905.1     | chr12_53918499-53918499_C_T   | 336R>H  | Substitution | Nonsynonymous coding | 12% |
| MM12T | ATF7IP  | activating transcription factor 7 interacting protein               | CCDS8663.1      | chr12_14577118-14577118_A_    | NA      | Deletion     | Frameshift           | 12% |
| MM12T | ATG13   | autophagy related 13                                                | CCDS44582.1     | chr11_46671756-46671756_C_T   | 116T>M  | Substitution | Nonsynonymous coding | 28% |
| MM12T | ATG2A   | autophagy related 2A                                                | CCDS31602.1     | chr11_64676761-64676761_C_T   | 729R>H  | Substitution | Nonsynonymous coding | 11% |
| MM12T | ATG4B   | autophagy related 4B, cysteine peptidase                            | CCDS46564.1     | chr2_242607996-242607996_G_A  | 285A>T  | Substitution | Nonsynonymous coding | 46% |
| MM12T | ATG7    | autophagy related 7                                                 | CCDS2605.1      | chr3_11402068-11402068_C_T    | 498A>V  | Substitution | Nonsynonymous coding | 22% |
| MM12T | ATHL1   | ATH1, acid trehalase-like 1 (yeast)                                 | CCDS31322.2     | chr11_294180-294180_G_A       | 598G>R  | Substitution | Nonsynonymous coding | 34% |
| MM12T | ATIC    | 5-aminoimidazole-4-carboxamide ribonucleotide formyltransferase/IMP | CCDS2398.1      | chr2_216182924-216182924_G_A  | 64R>H   | Substitution | Nonsynonymous coding | 15% |
| MM12T | ATL2    | atlastin GTPase 2                                                   | CCDS46260.1     | chr2_38570444-38570444_A_G    | 110L>P  | Substitution | Nonsynonymous coding | 14% |
| MM12T | ATL3    | atlastin GTPase 3                                                   | ENST00000332645 | chr11_63438813-63438813_C_A   | 51G>C   | Substitution | Nonsynonymous coding | 21% |
| MM12T | ATN1    | atrophin 1 [Source:HGNC Symbol;Acc:3033]                            | CCDS31734.1     | chr12_7045241-7045241_C_A     | 271P>T  | Substitution | Nonsynonymous coding | 39% |
| MM12T | ATN1    | atrophin 1 [Source:HGNC Symbol;Acc:3033]                            | CCDS31734.1     | chr12_7046127-7046127_C_A     | 566P>H  | Substitution | Nonsynonymous coding | 20% |
| MM12T | ATP10A  | ATPase, class V, type 10A                                           | CCDS32178.1     | chr15_25924948-25924948_G_T   | 1347S>Y | Substitution | Nonsynonymous coding | 34% |
| MM12T | ATP10A  | ATPase, class V, type 10A                                           | CCDS32178.1     | chr15_25940196-25940196_C_A   | 953R>M  | Substitution | Nonsynonymous coding | 31% |

|       |          |                                                                                 |                 |                               |         |              |                      |     |
|-------|----------|---------------------------------------------------------------------------------|-----------------|-------------------------------|---------|--------------|----------------------|-----|
| MM12T | ATP10A   | ATPase, class V, type 10A                                                       | CCDS32178.1     | chr15_25958905-25958905_G_A   | 754R>W  | Substitution | Nonsynonymous coding | 32% |
| MM12T | ATP10A   | ATPase, class V, type 10A                                                       | CCDS32178.1     | chr15_25959081-25959081_G_A   | 695A>V  | Substitution | Nonsynonymous coding | 39% |
| MM12T | ATP10D   | ATPase, class V, type 10D                                                       | CCDS3476.1      | chr4_47560276-47560276_C_T    | 807S>L  | Substitution | Nonsynonymous coding | 34% |
| MM12T | ATP11A   | ATPase, class VI, type 11A                                                      | CCDS32011.1     | chr13_113510224-113510224_G_T | ISV-1>  | Substitution | Splice site acceptor | 30% |
| MM12T | ATP11B   | ATPase, class VI, type 11B                                                      | CCDS33896.1     | chr3_182607205-182607205_A_T  | 951S>C  | Substitution | Nonsynonymous coding | 14% |
| MM12T | ATP11B   | ATPase, class VI, type 11B                                                      | CCDS33896.1     | chr3_182554963-182554963_G_A  | ISV+1>  | Substitution | Splice site donor    | 20% |
| MM12T | ATP11C   | ATPase, class VI, type 11C                                                      | CCDS14668.1     | chrX_138840030-138840030_A_   | NA      | Deletion     | Splice site acceptor | 43% |
| MM12T | ATP13A1  | ATPase type 13A1                                                                | CCDS32970.2     | chr19_19764607-19764607_G_T   | 696L>I  | Substitution | Nonsynonymous coding | 29% |
| MM12T | ATP13A2  | ATPase type 13A2                                                                | CCDS175.1       | chr1_17313384-17313384_A_G    | 1051F>L | Substitution | Nonsynonymous coding | 30% |
| MM12T | ATP13A4  | ATPase type 13A4                                                                | CCDS3304.2      | chr3_193182764-193182764_C_T  | 476V>I  | Substitution | Nonsynonymous coding | 26% |
| MM12T | ATP1A1   | ATPase, Na+/K+ transporting, alpha 1 polypeptide                                | CCDS887.1       | chr1_116930114-116930114_G_A  | ISV+1>  | Substitution | Splice site donor    | 11% |
| MM12T | ATP1A2   | ATPase, Na+/K+ transporting, alpha 2 polypeptide                                | CCDS1196.1      | chr1_160097414-160097414_G_A  | 274G>D  | Substitution | Nonsynonymous coding | 15% |
| MM12T | ATP1A2   | ATPase, Na+/K+ transporting, alpha 2 polypeptide                                | CCDS1196.1      | chr1_160104982-160104982_C_T  | 671T>I  | Substitution | Nonsynonymous coding | 32% |
| MM12T | ATP1A4   | ATPase, Na+/K+ transporting, alpha 4 polypeptide                                | CCDS1197.1      | chr1_160146396-160146396_C_T  | ISV+4>  | Substitution | Splice site donor    | 24% |
| MM12T | ATP1B2   | ATPase, Na+/K+ transporting, beta 2 polypeptide                                 | CCDS32550.1     | chr17_7556803-7556803_A_G     | 75D>G   | Substitution | Nonsynonymous coding | 46% |
| MM12T | ATP2A1   | ATPase, Ca++ transporting, cardiac muscle, fast twitch 1                        | CCDS10643.1     | chr16_28893848-28893848_G_A   | 134R>H  | Substitution | Nonsynonymous coding | 14% |
| MM12T | ATP2A1   | ATPase, Ca++ transporting, cardiac muscle, fast twitch 1                        | CCDS10643.1     | chr16_28911986-28911986_G_A   | 617A>T  | Substitution | Nonsynonymous coding | 13% |
| MM12T | ATP2C2   | ATPase, Ca++ transporting, type 2C, member 2                                    | CCDS42207.1     | chr16_84472842-84472842_C_T   | 353R>W  | Substitution | Nonsynonymous coding | 10% |
| MM12T | ATP5C1   | ATP synthase, H+ transporting, mitochondrial F1 complex, gamma polypeptide 1    | CCDS31142.1     | chr10_7844783-7844783_G_T     | 286E>X  | Substitution | Nonsense             | 31% |
| MM12T | ATP5G3   | ATP synthase, H+ transporting, mitochondrial Fo complex, subunit C3 (subunit 9) | CCDS2263.1      | chr2_176044851-176044851_C_T  | 32R>Q   | Substitution | Nonsynonymous coding | 23% |
| MM12T | ATP6V0A4 | ATPase, H+ transporting, lysosomal V0 subunit a4                                | CCDS5849.1      | chr7_138417717-138417717_C_T  | 605V>I  | Substitution | Nonsynonymous coding | 22% |
| MM12T | ATP6V0A4 | ATPase, H+ transporting, lysosomal V0 subunit a4                                | CCDS5849.1      | chr7_138429870-138429870_C_T  | 492W>X  | Substitution | Nonsense             | 39% |
| MM12T | ATP6V1A  | ATPase, H+ transporting, lysosomal 70kDa, V1 subunit A                          | CCDS2976.1      | chr3_113503628-113503628_G_A  | 171R>Q  | Substitution | Nonsynonymous coding | 32% |
| MM12T | ATP7A    | ATPase, Cu++ transporting, alpha polypeptide                                    | CCDS35339.1     | chrX_77302032-77302032_G_A    | 1490G>R | Substitution | Nonsynonymous coding | 29% |
| MM12T | ATP7B    | ATPase, Cu++ transporting, beta polypeptide                                     | CCDS41892.1     | chr13_52513207-52513207_C_T   | 1227A>T | Substitution | Nonsynonymous coding | 12% |
| MM12T | ATP7B    | ATPase, Cu++ transporting, beta polypeptide                                     | CCDS41892.1     | chr13_52520556-52520556_G_A   | 975S>F  | Substitution | Nonsynonymous coding | 30% |
| MM12T | ATP7B    | ATPase, Cu++ transporting, beta polypeptide                                     | CCDS41892.1     | chr13_52532535-52532535_G_A   | 756A>V  | Substitution | Nonsynonymous coding | 29% |
| MM12T | ATP8A1   | ATPase, aminophospholipid transporter (APLT), class I, type 8A, member 1        | CCDS3466.1      | chr4_42416721-42416721_G_A    | 1107A>V | Substitution | Nonsynonymous coding | 13% |
| MM12T | ATR      | ataxia telangiectasia and Rad3 related                                          | CCDS3124.1      | chr3_142232468-142232468_G_T  | 1506L>I | Substitution | Nonsynonymous coding | 13% |
| MM12T | ATXN10   | ataxin 10                                                                       | CCDS14070.1     | chr22_46088876-46088876_G_T   | 103R>S  | Substitution | Nonsynonymous coding | 19% |
| MM12T | ATXN10   | ataxin 10                                                                       | CCDS14070.1     | chr22_46088913-46088913_C_T   | 116L>F  | Substitution | Nonsynonymous coding | 14% |
| MM12T | ATXN2    | ataxin 2                                                                        | ENST00000389154 | chr12_111890598-111890598_G_A | 405P>L  | Substitution | Nonsynonymous coding | 33% |

|       |          |                                                                            |                 |                               |         |              |                      |     |
|-------|----------|----------------------------------------------------------------------------|-----------------|-------------------------------|---------|--------------|----------------------|-----|
| MM12T | ATXN2    | ataxin 2                                                                   | CCDS31902.1     | chr12_111926303-111926303_C_A | 899K>N  | Substitution | Nonsynonymous coding | 23% |
| MM12T | ATXN2L   | ataxin 2-like                                                              | CCDS10640.1     | chr16_28847369-28847369_C_T   | 1004A>V | Substitution | Nonsynonymous coding | 12% |
| MM12T | ATXN7L1  | ataxin 7-like 1                                                            | CCDS47682.1     | chr7_105254395-105254395_G_A  | 796P>S  | Substitution | Nonsynonymous coding | 11% |
| MM12T | AURKC    | aurora kinase C                                                            | CCDS33128.1     | chr19_57743402-57743402_C_T   | 36R>W   | Substitution | Nonsynonymous coding | 23% |
| MM12T | AVPR1A   | arginine vasopressin receptor 1A                                           | CCDS8965.1      | chr12_63541343-63541343_A_    | NA      | Deletion     | Frameshift           | 33% |
| MM12T | AVPR2    | arginine vasopressin receptor 2                                            | CCDS14735.1     | chrX_153172010-153172010_G_A  | 315S>N  | Substitution | Nonsynonymous coding | 10% |
| MM12T | AXIN2    | axin 2                                                                     | CCDS11662.1     | chr17_63545734-63545734_G_A   | 287S>F  | Substitution | Nonsynonymous coding | 14% |
| MM12T | AXL      | AXL receptor tyrosine kinase                                               | CCDS12575.1     | chr19_41748902-41748902_A_C   | 476K>T  | Substitution | Nonsynonymous coding | 37% |
| MM12T | AXL      | AXL receptor tyrosine kinase                                               | CCDS12575.1     | chr19_41758798-41758798_G_A   | 618V>I  | Substitution | Nonsynonymous coding | 19% |
| MM12T | AZI1     | 5-azacytidine induced 1                                                    | CCDS45808.1     | chr17_79170789-79170789_G_A   | 572R>W  | Substitution | Nonsynonymous coding | 25% |
| MM12T | B3GALT6  | UDP-Gal:betaGal beta 1,3-galactosyltransferase polypeptide 6               | CCDS13.1        | chr1_1168512-1168512_A_G      | 285D>G  | Substitution | Nonsynonymous coding | 36% |
| MM12T | B3GNT2   | UDP-GlcNAc:betaGal beta-1,3-N-acetylglucosaminyltransferase 2              | CCDS1870.1      | chr2_62450470-62450470_T_C    | 372L>P  | Substitution | Nonsynonymous coding | 33% |
| MM12T | B3GNT9   | UDP-GlcNAc:betaGal beta-1,3-N-acetylglucosaminyltransferase 9              | CCDS45509.1     | chr16_67183440-67183440_C_T   | 317V>I  | Substitution | Nonsynonymous coding | 28% |
| MM12T | B4GALNT2 | beta-1,4-N-acetyl-galactosaminyl transferase 2                             | CCDS11544.1     | chr17_47246123-47246123_G_T   | 452K>N  | Substitution | Nonsynonymous coding | 31% |
| MM12T | B4GALNT4 | beta-1,4-N-acetyl-galactosaminyl transferase 4                             | CCDS7694.1      | chr11_380019-380019_G_A       | 881R>Q  | Substitution | Nonsynonymous coding | 35% |
| MM12T | B4GALT7  | xylosylprotein beta 1,4-galactosyltransferase, polypeptide 7               | CCDS4429.1      | chr5_177036001-177036001_G_A  | 272A>T  | Substitution | Nonsynonymous coding | 13% |
| MM12T | BAAT     | bile acid CoA: amino acid N-acyltransferase (glycine N-choloyltransferase) | CCDS6752.1      | chr9_104125077-104125077_C_T  | 297R>H  | Substitution | Nonsynonymous coding | 26% |
| MM12T | BACE1    | beta-site APP-cleaving enzyme 1                                            | CCDS8383.1      | chr11_117164718-117164718_C_T | 192D>N  | Substitution | Nonsynonymous coding | 13% |
| MM12T | BACH1    | BTB and CNC homology 1, basic leucine zipper transcription factor 1        | ENST00000422809 | chr21_30969991-30969991_G_T   | 205R>I  | Substitution | Nonsynonymous coding | 15% |
| MM12T | BAG1     | BCL2-associated athanogene                                                 | CCDS35004.1     | chr9_33264527-33264527_G_A    | 49A>V   | Substitution | Nonsynonymous coding | 17% |
| MM12T | BAG3     | BCL2-associated athanogene 3                                               | CCDS7615.1      | chr10_121436172-121436172_C_T | 369A>V  | Substitution | Nonsynonymous coding | 15% |
| MM12T | BAHCC1   | BAH domain and coiled-coil containing 1 [Source:HGNC Symbol;Acc:29279]     | ENST00000436173 | chr17_79414665-79414665_C_T   | 1256A>V | Substitution | Nonsynonymous coding | 24% |
| MM12T | BAHD1    | bromo adjacent homology domain containing 1                                | CCDS10058.1     | chr15_40751416-40751416_G_T   | 251K>N  | Substitution | Nonsynonymous coding | 31% |
| MM12T | BAI1     | brain-specific angiogenesis inhibitor 1                                    | NM_001702       | chr8_143602200-143602200_C_T  | 980R>C  | Substitution | Nonsynonymous coding | 28% |
| MM12T | BAI1     | brain-specific angiogenesis inhibitor 1                                    | NM_001702       | chr8_143618427-143618427_G_A  | 1217G>D | Substitution | Nonsynonymous coding | 35% |
| MM12T | BAI1     | brain-specific angiogenesis inhibitor 1                                    | NM_001702       | chr8_143623950-143623950_G_T  | 1452S>I | Substitution | Nonsynonymous coding | 28% |
| MM12T | BAI3     | brain-specific angiogenesis inhibitor 3                                    | CCDS4968.1      | chr6_69665964-69665964_C_T    | 415T>M  | Substitution | Nonsynonymous coding | 39% |
| MM12T | BAI3     | brain-specific angiogenesis inhibitor 3                                    | CCDS4968.1      | chr6_69723957-69723957_C_A    | 653L>I  | Substitution | Nonsynonymous coding | 48% |
| MM12T | BAIAP2L2 | BAI1-associated protein 2-like 2                                           | CCDS43018.1     | chr22_38482343-38482343_C_T   | 458R>Q  | Substitution | Nonsynonymous coding | 68% |
| MM12T | BAIAP3   | BAI1-associated protein 3                                                  | CCDS10434.1     | chr16_1391434-1391434_G_T     | 260Q>H  | Substitution | Nonsynonymous coding | 10% |
| MM12T | BAMBI    | BMP and activin membrane-bound inhibitor homolog (Xenopus laevis)          | CCDS7162.1      | chr10_28970385-28970385_C_T   | 92T>I   | Substitution | Nonsynonymous coding | 27% |
| MM12T | BANP     | BTG3 associated nuclear protein                                            | CCDS10966.2     | chr16_88039844-88039844_G_A   | 171V>I  | Substitution | Nonsynonymous coding | 34% |

|       |        |                                                             |             |                               |         |              |                      |     |
|-------|--------|-------------------------------------------------------------|-------------|-------------------------------|---------|--------------|----------------------|-----|
| MM12T | BARD1  | BRCA1 associated RING domain 1                              | CCDS2397.1  | chr2_215609847-215609847_C_T  | 616S>N  | Substitution | Nonsynonymous coding | 21% |
| MM12T | BAZ1A  | bromodomain adjacent to zinc finger domain, 1A              | CCDS9651.1  | chr14_35234138-35234138_G_A   | 1184T>I | Substitution | Nonsynonymous coding | 31% |
| MM12T | BAZ1B  | bromodomain adjacent to zinc finger domain, 1B              | CCDS5549.1  | chr7_72873957-72873957_G_A    | 1114A>V | Substitution | Nonsynonymous coding | 24% |
| MM12T | BAZ1B  | bromodomain adjacent to zinc finger domain, 1B              | CCDS5549.1  | chr7_72891811-72891811_C_A    | 660Q>H  | Substitution | Nonsynonymous coding | 11% |
| MM12T | BAZ1B  | bromodomain adjacent to zinc finger domain, 1B              | CCDS5549.1  | chr7_72856543-72856543_G_A    | 1479R>X | Substitution | Nonsense             | 35% |
| MM12T | BAZ2A  | bromodomain adjacent to zinc finger domain, 2A              | CCDS44924.1 | chr12_56992674-56992674_G_A   | 1844R>W | Substitution | Nonsynonymous coding | 11% |
| MM12T | BBC3   | BCL2 binding component 3                                    | CCDS46129.1 | chr19_47725082-47725082_C_T   | 221S>N  | Substitution | Nonsynonymous coding | 28% |
| MM12T | BBS5   | Bardet-Biedl syndrome 5                                     | CCDS2233.1  | chr2_170359660-170359660_A_G  | 291D>G  | Substitution | Nonsynonymous coding | 15% |
| MM12T | BBX    | bobby sox homolog (Drosophila)                              | CCDS46881.1 | chr3_107435563-107435563_G_A  | 91C>Y   | Substitution | Nonsynonymous coding | 30% |
| MM12T | BBX    | bobby sox homolog (Drosophila)                              | CCDS46881.1 | chr3_107524293-107524293_G_A  | 939A>T  | Substitution | Nonsynonymous coding | 24% |
| MM12T | BCAR1  | breast cancer anti-estrogen resistance 1                    | CCDS10915.1 | chr16_75263657-75263657_C_T   | 789A>T  | Substitution | Nonsynonymous coding | 32% |
| MM12T | BCAS3  | breast carcinoma amplified sequence 3                       | CCDS45749.1 | chr17_59155805-59155805_T_G   | 763S>A  | Substitution | Nonsynonymous coding | 30% |
| MM12T | BCAS3  | breast carcinoma amplified sequence 3                       | CCDS45749.1 | chr17_59469335-59469335_C_T   | ISV-3>  | Substitution | Splice site acceptor | 26% |
| MM12T | BCHE   | butyrylcholinesterase                                       | CCDS3198.1  | chr3_165548191-165548191_C_A  | 211A>S  | Substitution | Nonsynonymous coding | 25% |
| MM12T | BCKDHB | branched chain keto acid dehydrogenase E1, beta polypeptide | CCDS4994.1  | chr6_80878617-80878617_G_A    | 168R>H  | Substitution | Nonsynonymous coding | 20% |
| MM12T | BCKDHB | branched chain keto acid dehydrogenase E1, beta polypeptide | CCDS4994.1  | chr6_80881032-80881032_G_T    | 223G>X  | Substitution | Nonsense             | 37% |
| MM12T | BCKDK  | branched chain ketoacid dehydrogenase kinase                | CCDS10705.1 | chr16_31122419-31122419_T_C   | 242C>R  | Substitution | Nonsynonymous coding | 10% |
| MM12T | BCL11B | B-cell CLL/lymphoma 11B (zinc finger protein)               | CCDS9950.1  | chr14_99641309-99641309_C_T   | 622A>T  | Substitution | Nonsynonymous coding | 38% |
| MM12T | BCL2   | B-cell CLL/lymphoma 2                                       | CCDS11981.1 | chr18_60795908-60795908_C_T   | 224A>T  | Substitution | Nonsynonymous coding | 21% |
| MM12T | BCL3   | B-cell CLL/lymphoma 3                                       | CCDS12642.2 | chr19_45260462-45260462_G_T   | 236E>D  | Substitution | Nonsynonymous coding | 34% |
| MM12T | BCL6B  | B-cell CLL/lymphoma 6, member B                             | CCDS42248.1 | chr17_6927428-6927428_G_A     | 69G>D   | Substitution | Nonsynonymous coding | 26% |
| MM12T | BCL6B  | B-cell CLL/lymphoma 6, member B                             | CCDS42248.1 | chr17_6927800-6927800_C_T     | 161P>L  | Substitution | Nonsynonymous coding | 13% |
| MM12T | BCL9   | B-cell CLL/lymphoma 9                                       | CCDS30833.1 | chr1_147086310-147086310_G_T  | 152R>M  | Substitution | Nonsynonymous coding | 29% |
| MM12T | BCL9   | B-cell CLL/lymphoma 9                                       | CCDS30833.1 | chr1_147092737-147092737_C_T  | 926L>F  | Substitution | Nonsynonymous coding | 17% |
| MM12T | BCL9   | B-cell CLL/lymphoma 9                                       | CCDS30833.1 | chr1_147095697-147095697_C_T  | 1073P>L | Substitution | Nonsynonymous coding | 12% |
| MM12T | BCL9L  | B-cell CLL/lymphoma 9-like                                  | CCDS8403.1  | chr11_118771672-118771672_G_A | 927P>L  | Substitution | Nonsynonymous coding | 24% |
| MM12T | BCMO1  | beta-carotene 15,15'-monooxygenase 1                        | CCDS10934.1 | chr16_81301680-81301680_G_A   | 263A>T  | Substitution | Nonsynonymous coding | 10% |
| MM12T | BCO2   | beta-carotene oxygenase 2                                   | CCDS8358.2  | chr11_112050117-112050117_T_G | 69S>A   | Substitution | Nonsynonymous coding | 36% |
| MM12T | BCOR   | BCL6 corepressor                                            | CCDS48093.1 | chrX_39932749-39932749_G_A    | 617A>V  | Substitution | Nonsynonymous coding | 21% |
| MM12T | BCORL1 | BCL6 corepressor-like 1                                     | CCDS14616.1 | chrX_129149524-129149524_C_A  | 926L>I  | Substitution | Nonsynonymous coding | 35% |
| MM12T | BCORL1 | BCL6 corepressor-like 1                                     | CCDS14616.1 | chrX_129189993-129189993_G_A  | 1673G>E | Substitution | Nonsynonymous coding | 15% |
| MM12T | BCR    | breakpoint cluster region                                   | CCDS13806.1 | chr22_23524040-23524040_G_A   | 298R>H  | Substitution | Nonsynonymous coding | 28% |

|       |        |                                                                                      |                 |                               |         |              |                      |     |
|-------|--------|--------------------------------------------------------------------------------------|-----------------|-------------------------------|---------|--------------|----------------------|-----|
| MM12T | BDKRB1 | bradykinin receptor B1                                                               | CCDS9943.1      | chr14_96730497-96730497_C_A   | 160L>I  | Substitution | Nonsynonymous coding | 20% |
| MM12T | BDKRB2 | bradykinin receptor B2                                                               | CCDS9942.1      | chr14_96706784-96706784_G_A   | 40G>E   | Substitution | Nonsynonymous coding | 19% |
| MM12T | BDP1   | B double prime 1, subunit of RNA polymerase III transcription initiation factor IIIB | CCDS43328.1     | chr5_70782320-70782320_G_A    | 360R>H  | Substitution | Nonsynonymous coding | 56% |
| MM12T | BDP1   | B double prime 1, subunit of RNA polymerase III transcription initiation factor IIIB | CCDS43328.1     | chr5_70785377-70785377_G_A    | 454A>T  | Substitution | Nonsynonymous coding | 35% |
| MM12T | BDP1   | B double prime 1, subunit of RNA polymerase III transcription initiation factor IIIB | CCDS43328.1     | chr5_70845290-70845290_A_C    | 2284Q>H | Substitution | Nonsynonymous coding | 47% |
| MM12T | BDP1   | B double prime 1, subunit of RNA polymerase III transcription initiation factor IIIB | CCDS43328.1     | chr5_70860660-70860660_T_C    | 2608V>A | Substitution | Nonsynonymous coding | 14% |
| MM12T | BEND2  | BEN domain containing 2                                                              | CCDS14184.1     | chrX_18192212-18192212_G_A    | 640A>V  | Substitution | Nonsynonymous coding | 28% |
| MM12T | BEST3  | bestrophin 3                                                                         | CCDS8992.2      | chr12_70091461-70091461_C_T   | 40A>T   | Substitution | Nonsynonymous coding | 28% |
| MM12T | BEX5   | brain expressed, X-linked 5                                                          | CCDS35350.1     | chrX_101408913-101408913_G_T  | 109L>I  | Substitution | Nonsynonymous coding | 34% |
| MM12T | BFSP1  | beaded filament structural protein 1, filensin                                       | CCDS13126.1     | chr20_17474952-17474952_G_A   | 589P>S  | Substitution | Nonsynonymous coding | 11% |
| MM12T | BFSP1  | beaded filament structural protein 1, filensin                                       | CCDS13126.1     | chr20_17511691-17511691_T_A   | 95N>I   | Substitution | Nonsynonymous coding | 26% |
| MM12T | BGN    | biglycan                                                                             | CCDS14721.1     | chrX_152772061-152772061_C_T  | 214R>C  | Substitution | Nonsynonymous coding | 10% |
| MM12T | BHLHA9 | basic helix-loop-helix family, member a9                                             | CCDS45560.1     | chr17_1174057-1174057_G_A     | 67R>H   | Substitution | Nonsynonymous coding | 17% |
| MM12T | BHMT2  | betaine--homocysteine S-methyltransferase 2                                          | CCDS4045.1      | chr5_78376543-78376543_G_A    | 98A>T   | Substitution | Nonsynonymous coding | 10% |
| MM12T | BID    | BH3 interacting domain death agonist                                                 | CCDS13747.1     | chr22_18232885-18232885_C_T   | 46A>T   | Substitution | Nonsynonymous coding | 25% |
| MM12T | BIN3   | bridging integrator 3                                                                | CCDS47825.1     | chr8_22487971-22487971_G_A    | 94A>V   | Substitution | Nonsynonymous coding | 23% |
| MM12T | BIRC5  | baculoviral IAP repeat containing 5                                                  | CCDS32752.1     | chr17_76219600-76219600_C_T   | 155R>C  | Substitution | Nonsynonymous coding | 35% |
| MM12T | BIRC6  | baculoviral IAP repeat containing 6                                                  | CCDS33175.2     | chr2_32692736-32692736_G_A    | 1834A>T | Substitution | Nonsynonymous coding | 16% |
| MM12T | BIRC6  | baculoviral IAP repeat containing 6                                                  | CCDS33175.2     | chr2_32702593-32702593_T_C    | 2337L>P | Substitution | Nonsynonymous coding | 28% |
| MM12T | BIRC6  | baculoviral IAP repeat containing 6                                                  | CCDS33175.2     | chr2_32750551-32750551_C_T    | 3926R>C | Substitution | Nonsynonymous coding | 23% |
| MM12T | BIRC6  | baculoviral IAP repeat containing 6                                                  | CCDS33175.2     | chr2_32774414-32774414_C_T    | 4337A>V | Substitution | Nonsynonymous coding | 11% |
| MM12T | BIRC7  | baculoviral IAP repeat containing 7                                                  | ENST00000395306 | chr20_61869599-61869599_C_T   | 14R>C   | Substitution | Nonsynonymous coding | 14% |
| MM12T | BIRC8  | baculoviral IAP repeat containing 8                                                  | CCDS12863.1     | chr19_53793489-53793489_C_A   | 47A>S   | Substitution | Nonsynonymous coding | 26% |
| MM12T | BLID   | BH3-like motif containing, cell death inducer                                        | CCDS31693.1     | chr11_121986441-121986441_C_A | 64V>L   | Substitution | Nonsynonymous coding | 35% |
| MM12T | BLM    | Bloom syndrome, RecQ helicase-like                                                   | CCDS10363.1     | chr15_91304139-91304139_A_    | NA      | Deletion     | Frameshift           | 19% |
| MM12T | BLMH   | bleomycin hydrolase                                                                  | CCDS32604.1     | chr17_28616498-28616498_G_A   | 72R>X   | Substitution | Nonsense             | 31% |
| MM12T | BLNK   | B-cell linker                                                                        | CCDS7446.1      | chr10_97951784-97951784_C_T   | 439S>N  | Substitution | Nonsynonymous coding | 15% |
| MM12T | BMP1   | bone morphogenetic protein 1                                                         | CCDS6026.1      | chr8_22052406-22052406_C_T    | 538A>V  | Substitution | Nonsynonymous coding | 31% |
| MM12T | BMP6   | bone morphogenetic protein 6                                                         | CCDS4503.1      | chr6_7862638-7862638_C_T      | 371R>C  | Substitution | Nonsynonymous coding | 10% |
| MM12T | BMP7   | bone morphogenetic protein 7                                                         | CCDS13455.1     | chr20_55841160-55841160_G_A   | 7R>X    | Substitution | Nonsense             | 10% |
| MM12T | BMPR1B | bone morphogenetic protein receptor, type IB                                         | CCDS3642.1      | chr4_96052665-96052665_T_C    | ISV+2>  | Substitution | Splice site donor    | 21% |
| MM12T | BMS1   | BMS1 homolog, ribosome assembly protein (yeast)                                      | CCDS7199.1      | chr10_43292494-43292494_G_C   | 601S>T  | Substitution | Nonsynonymous coding | 40% |



|       |        |                                                                                            |                 |                              |         |              |                      |     |
|-------|--------|--------------------------------------------------------------------------------------------|-----------------|------------------------------|---------|--------------|----------------------|-----|
| MM12T | BNC1   | basonuclin 1                                                                               | CCDS10324.1     | chr15_83926489-83926489_G_A  | 897S>L  | Substitution | Nonsynonymous coding | 31% |
| MM12T | BNIP1  | BCL2/adenovirus E1B 19kDa interacting protein 1                                            | CCDS4385.1      | chr5_172578611-172578611_T_  | NA      | Deletion     | Frameshift           | 35% |
| MM12T | BNIPL  | BCL2/adenovirus E1B 19kD interacting protein like                                          | CCDS978.2       | chr1_151018347-151018347_G_A | 309R>Q  | Substitution | Nonsynonymous coding | 33% |
| MM12T | BOC    | BOC cell adhesion associated, oncogene regulated                                           | CCDS2971.1      | chr3_112991398-112991398_G_A | 270S>N  | Substitution | Nonsynonymous coding | 31% |
| MM12T | BOK    | BCL2-related ovarian killer                                                                | CCDS2550.1      | chr2_242509659-242509659_G_A | 157V>M  | Substitution | Nonsynonymous coding | 49% |
| MM12T | BORA   | bora, aurora kinase A activator                                                            | CCDS9446.1      | chr13_73321193-73321193_T_C  | 476C>R  | Substitution | Nonsynonymous coding | 24% |
| MM12T | BPIFA2 | BPI fold containing family A, member 2                                                     | CCDS13214.1     | chr20_31760858-31760858_T_G  | 93L>R   | Substitution | Nonsynonymous coding | 28% |
| MM12T | BPIFB1 | BPI fold containing family B, member 1                                                     | CCDS13218.1     | chr20_31878894-31878894_G_A  | 166R>H  | Substitution | Nonsynonymous coding | 11% |
| MM12T | BPIFB1 | BPI fold containing family B, member 1                                                     | CCDS13218.1     | chr20_31890779-31890779_G_A  | 347E>K  | Substitution | Nonsynonymous coding | 17% |
| MM12T | BPIFB1 | BPI fold containing family B, member 1                                                     | CCDS13218.1     | chr20_31894729-31894729_C_T  | 444S>F  | Substitution | Nonsynonymous coding | 15% |
| MM12T | BPIFB4 | BPI fold containing family B, member 4                                                     | CCDS13213.2     | chr20_31671236-31671236_G_A  | 78G>D   | Substitution | Nonsynonymous coding | 13% |
| MM12T | BPIFC  | BPI fold containing family C                                                               | CCDS13906.1     | chr22_32815359-32815359_C_A  | 417S>I  | Substitution | Nonsynonymous coding | 35% |
| MM12T | BRAT1  | BRCA1-associated ATM activator 1                                                           | ENST00000382467 | chr7_2582524-2582524_C_T     | 49R>H   | Substitution | Nonsynonymous coding | 14% |
| MM12T | BRCA2  | breast cancer 2, early onset                                                               | CCDS9344.1      | chr13_32899249-32899249_G_A  | 118R>H  | Substitution | Nonsynonymous coding | 17% |
| MM12T | BRCA2  | breast cancer 2, early onset                                                               | CCDS9344.1      | chr13_32915198-32915198_G_A  | 2236E>K | Substitution | Nonsynonymous coding | 11% |
| MM12T | BRD3   | bromodomain containing 3                                                                   | CCDS6980.1      | chr9_136905225-136905225_G_A | 525P>L  | Substitution | Nonsynonymous coding | 33% |
| MM12T | BRD8   | bromodomain containing 8                                                                   | CCDS4198.1      | chr5_137500779-137500779_G_T | 452P>H  | Substitution | Nonsynonymous coding | 34% |
| MM12T | BRD9   | bromodomain containing 9                                                                   | CCDS34127.1     | chr5_881266-881266_C_A       | 237S>I  | Substitution | Nonsynonymous coding | 32% |
| MM12T | BRSK1  | BR serine/threonine kinase 1                                                               | CCDS12921.1     | chr19_55814112-55814112_G_A  | 302R>H  | Substitution | Nonsynonymous coding | 31% |
| MM12T | BRSK2  | BR serine/threonine kinase 2                                                               | CCDS41590.1     | chr11_1480430-1480430_A_G    | 650N>D  | Substitution | Nonsynonymous coding | 44% |
| MM12T | BRSK2  | BR serine/threonine kinase 2                                                               | ENST00000308230 | chr11_1469027-1469027_G_A    | ISV-1>  | Substitution | Splice site acceptor | 29% |
| MM12T | BRWD1  | bromodomain and WD repeat domain containing 1                                              | CCDS13662.1     | chr21_40581991-40581991__A   | NA      | Insertion    | Frameshift           | 25% |
| MM12T | BRWD3  | bromodomain and WD repeat domain containing 3                                              | CCDS14447.1     | chrX_79991591-79991591_A_    | NA      | Deletion     | Splice site acceptor | 14% |
| MM12T | BRWD3  | bromodomain and WD repeat domain containing 3                                              | CCDS14447.1     | chrX_79984250-79984250_C_T   | ISV+1>  | Substitution | Splice site donor    | 20% |
| MM12T | BRWD3  | bromodomain and WD repeat domain containing 3                                              | CCDS14447.1     | chrX_80064508-80064508_G_A   | ISV+4>  | Substitution | Splice site donor    | 31% |
| MM12T | BTAF1  | BTAF1 RNA polymerase II, B-TFIID transcription factor-associated, 170kDa (Mot1 homolog, S. | CCDS7419.1      | chr10_93702328-93702328_C_A  | ISV+3>  | Substitution | Splice site donor    | 23% |
| MM12T | BTBD3  | BTB (POZ) domain containing 3                                                              | CCDS13113.1     | chr20_11903690-11903690_G_T  | 315K>N  | Substitution | Nonsynonymous coding | 40% |
| MM12T | BTBD7  | BTB (POZ) domain containing 7                                                              | CCDS32146.1     | chr14_93761193-93761193_T_   | NA      | Deletion     | Frameshift           | 29% |
| MM12T | BTBD7  | BTB (POZ) domain containing 7                                                              | CCDS32146.1     | chr14_93717955-93717955_C_T  | 599R>H  | Substitution | Nonsynonymous coding | 22% |
| MM12T | BTK    | Bruton agammaglobulinemia tyrosine kinase                                                  | CCDS14482.1     | chrX_100630190-100630190_C_T | 28R>H   | Substitution | Nonsynonymous coding | 33% |
| MM12T | BTN2A2 | butyrophilin, subfamily 2, member A2                                                       | CCDS4606.1      | chr6_26388406-26388406_G_A   | 203G>D  | Substitution | Nonsynonymous coding | 19% |
| MM12T | BTNL9  | butyrophilin-like 9                                                                        | CCDS4460.2      | chr5_180486432-180486432_G_A | 393R>H  | Substitution | Nonsynonymous coding | 14% |

|       |           |                                                          |                 |                               |         |              |                      |     |
|-------|-----------|----------------------------------------------------------|-----------------|-------------------------------|---------|--------------|----------------------|-----|
| MM12T | BZRAP1    | benzodiazapine receptor (peripheral associated protein 1 | CCDS11605.1     | chr17_56405253-56405253_G_T   | 10P>H   | Substitution | Nonsynonymous coding | 24% |
| MM12T | C10orf112 | chromosome 10 open reading frame 112                     | ENST00000454679 | chr10_19569027-19569027_C_T   | 96T>I   | Substitution | Nonsynonymous coding | 13% |
| MM12T | C10orf112 | chromosome 10 open reading frame 112                     | ENST00000454679 | chr10_19616510-19616510_A_C   | 251N>H  | Substitution | Nonsynonymous coding | 28% |
| MM12T | C10orf118 | chromosome 10 open reading frame 118                     | CCDS7587.1      | chr10_115891005-115891005_C_T | 668A>T  | Substitution | Nonsynonymous coding | 13% |
| MM12T | C10orf118 | chromosome 10 open reading frame 118                     | CCDS7587.1      | chr10_115894744-115894744_C_T | 528R>H  | Substitution | Nonsynonymous coding | 21% |
| MM12T | C10orf137 | chromosome 10 open reading frame 137                     | CCDS7646.1      | chr10_127426521-127426521_A_C | 564E>A  | Substitution | Nonsynonymous coding | 13% |
| MM12T | C10orf137 | chromosome 10 open reading frame 137                     | CCDS7646.1      | chr10_127426535-127426535_C_T | 569L>F  | Substitution | Nonsynonymous coding | 35% |
| MM12T | C10orf68  | chromosome 10 open reading frame 68                      | CCDS31177.1     | chr10_33137556-33137556_G_A   | 512V>I  | Substitution | Nonsynonymous coding | 36% |
| MM12T | C11orf21  | chromosome 11 open reading frame 21                      | CCDS44518.1     | chr11_2323001-2323001_C_T     | 31A>T   | Substitution | Nonsynonymous coding | 19% |
| MM12T | C11orf24  | chromosome 11 open reading frame 24                      | CCDS8180.1      | chr11_68029865-68029865_C_T   | 200A>T  | Substitution | Nonsynonymous coding | 32% |
| MM12T | C11orf49  | chromosome 11 open reading frame 49                      | CCDS31480.1     | chr11_47176747-47176747_C_T   | 129A>V  | Substitution | Nonsynonymous coding | 31% |
| MM12T | C11orf89  | chromosome 11 open reading frame 89                      | ENST00000391480 | chr11_1911646-1911646_C_T     | 57A>T   | Substitution | Nonsynonymous coding | 36% |
| MM12T | C12orf4   | chromosome 12 open reading frame 4                       | CCDS8528.1      | chr12_4598983-4598983_G_A     | 550S>F  | Substitution | Nonsynonymous coding | 27% |
| MM12T | C12orf56  | chromosome 12 open reading frame 56                      | CCDS44935.1     | chr12_64664484-64664484_A_G   | 372V>A  | Substitution | Nonsynonymous coding | 32% |
| MM12T | C12orf60  | chromosome 12 open reading frame 60                      | CCDS8667.1      | chr12_14976237-14976237_T_C   | 123I>T  | Substitution | Nonsynonymous coding | 27% |
| MM12T | C12orf74  | chromosome 12 open reading frame 74                      | CCDS41819.1     | chr12_93101441-93101441_C_A   | 175P>T  | Substitution | Nonsynonymous coding | 28% |
| MM12T | C13orf35  | chromosome 13 open reading frame 35                      | CCDS9526.1      | chr13_113333775-113333775_G_A | 28A>T   | Substitution | Nonsynonymous coding | 30% |
| MM12T | C14orf159 | chromosome 14 open reading frame 159                     | ENST00000298858 | chr14_91633917-91633917_G_A   | 121R>H  | Substitution | Nonsynonymous coding | 32% |
| MM12T | C14orf159 | chromosome 14 open reading frame 159                     | CCDS41979.1     | chr14_91647656-91647656_C_A   | 286P>H  | Substitution | Nonsynonymous coding | 21% |
| MM12T | C14orf93  | chromosome 14 open reading frame 93                      | CCDS9583.1      | chr14_23456769-23456769_C_A   | 424E>D  | Substitution | Nonsynonymous coding | 35% |
| MM12T | C15orf39  | chromosome 15 open reading frame 39                      | CCDS10276.1     | chr15_75498687-75498687_G_T   | 100G>C  | Substitution | Nonsynonymous coding | 32% |
| MM12T | C15orf39  | chromosome 15 open reading frame 39                      | CCDS10276.1     | chr15_75500086-75500086_G_A   | 566G>D  | Substitution | Nonsynonymous coding | 11% |
| MM12T | C15orf39  | chromosome 15 open reading frame 39                      | CCDS10276.1     | chr15_75500958-75500958_C_A   | 857L>M  | Substitution | Nonsynonymous coding | 12% |
| MM12T | C15orf39  | chromosome 15 open reading frame 39                      | CCDS10276.1     | chr15_75503327-75503327_G_A   | 1005R>H | Substitution | Nonsynonymous coding | 20% |
| MM12T | C15orf48  | chromosome 15 open reading frame 48                      | CCDS10124.1     | chr15_45723033-45723033_A_G   | ISV+3>  | Substitution | Splice site donor    | 39% |
| MM12T | C15orf52  | chromosome 15 open reading frame 52                      | CCDS10055.2     | chr15_40631782-40631782_C_    | NA      | Deletion     | Frameshift           | 35% |
| MM12T | C15orf54  | chromosome 15 open reading frame 54                      | CCDS10049.1     | chr15_39544541-39544541_G_A   | 69A>T   | Substitution | Nonsynonymous coding | 11% |
| MM12T | C15orf55  | chromosome 15 open reading frame 55                      | CCDS32190.1     | chr15_34642912-34642912_C_T   | 245L>F  | Substitution | Nonsynonymous coding | 37% |
| MM12T | C16orf11  | chromosome 16 open reading frame 11                      | CCDS45365.1     | chr16_613631-613631_G_A       | 113A>T  | Substitution | Nonsynonymous coding | 25% |
| MM12T | C16orf11  | chromosome 16 open reading frame 11                      | CCDS45365.1     | chr16_614276-614276_C_T       | 328R>W  | Substitution | Nonsynonymous coding | 13% |
| MM12T | C16orf54  | chromosome 16 open reading frame 54                      | CCDS10652.1     | chr16_29756203-29756203_G_A   | 24P>S   | Substitution | Nonsynonymous coding | 11% |
| MM12T | C16orf86  | chromosome 16 open reading frame 86                      | CCDS32468.2     | chr16_67701331-67701331_C_T   | 79R>W   | Substitution | Nonsynonymous coding | 16% |

|       |           |                                                 |                 |                               |        |              |                      |     |
|-------|-----------|-------------------------------------------------|-----------------|-------------------------------|--------|--------------|----------------------|-----|
| MM12T | C16orf91  | chromosome 16 open reading frame 91             | CCDS32360.1     | chr16_1478443-1478443_A_G     | 70S>P  | Substitution | Nonsynonymous coding | 33% |
| MM12T | C17orf47  | chromosome 17 open reading frame 47             | CCDS32691.1     | chr17_56621358-56621358_C_T   | 64A>T  | Substitution | Nonsynonymous coding | 12% |
| MM12T | C17orf62  | chromosome 17 open reading frame 62             | ENST00000342572 | chr17_80401431-80401431_G_A   | 191P>S | Substitution | Nonsynonymous coding | 14% |
| MM12T | C17orf70  | chromosome 17 open reading frame 70             | CCDS32765.1     | chr17_79514274-79514274_C_T   | 461G>R | Substitution | Nonsynonymous coding | 31% |
| MM12T | C17orf75  | chromosome 17 open reading frame 75             | NM_022344       | chr17_30658936-30658936_G_T   | 346A>D | Substitution | Nonsynonymous coding | 16% |
| MM12T | C17orf97  | chromosome 17 open reading frame 97             | CCDS32519.2     | chr17_260197-260197_C_T       | 22P>S  | Substitution | Nonsynonymous coding | 45% |
| MM12T | C17orf98  | chromosome 17 open reading frame 98             | CCDS42310.1     | chr17_36997620-36997620_C_T   | 8R>H   | Substitution | Nonsynonymous coding | 25% |
| MM12T | C17orf99  | chromosome 17 open reading frame 99             | NM_001163075    | chr17_76160284-76160284_G_A   | 160S>N | Substitution | Nonsynonymous coding | 10% |
| MM12T | C18orf32  | chromosome 18 open reading frame 32             | CCDS32831.1     | chr18_47010001-47010001_C_T   | 40A>T  | Substitution | Nonsynonymous coding | 32% |
| MM12T | C18orf8   | chromosome 18 open reading frame 8              | CCDS32803.1     | chr18_21109195-21109195_G_A   | 450R>Q | Substitution | Nonsynonymous coding | 34% |
| MM12T | C19orf24  | chromosome 19 open reading frame 24             | ENST00000416408 | chr19_1278902-1278902_C_G     | 31H>Q  | Substitution | Nonsynonymous coding | 35% |
| MM12T | C19orf25  | chromosome 19 open reading frame 25             | CCDS45898.1     | chr19_1478808-1478808_G_A     | 32A>V  | Substitution | Nonsynonymous coding | 45% |
| MM12T | C19orf38  | chromosome 19 open reading frame 38             | CCDS45970.1     | chr19_10959188-10959188_C_T   | 2P>S   | Substitution | Nonsynonymous coding | 33% |
| MM12T | C19orf38  | chromosome 19 open reading frame 38             | CCDS45970.1     | chr19_10961021-10961021_G_A   | 40A>T  | Substitution | Nonsynonymous coding | 43% |
| MM12T | C19orf68  | chromosome 19 open reading frame 68             | ENST00000328759 | chr19_48698592-48698592_C_T   | 424A>V | Substitution | Nonsynonymous coding | 11% |
| MM12T | C1GALT1C1 | C1GALT1-specific chaperone 1                    | CCDS14602.1     | chrX_119760552-119760552_A_C  | 157F>C | Substitution | Nonsynonymous coding | 31% |
| MM12T | C1orf110  | chromosome 1 open reading frame 110             | CCDS44269.1     | chr1_162824700-162824700_T_G  | 255N>T | Substitution | Nonsynonymous coding | 36% |
| MM12T | C1orf114  | chromosome 1 open reading frame 114             | CCDS1279.1      | chr1_169390795-169390795_C_T  | 292A>T | Substitution | Nonsynonymous coding | 13% |
| MM12T | C1orf168  | chromosome 1 open reading frame 168             | CCDS30729.1     | chr1_57192215-57192215_G_A    | 612T>I | Substitution | Nonsynonymous coding | 13% |
| MM12T | C1orf173  | chromosome 1 open reading frame 173             | CCDS30755.1     | chr1_75038564-75038564_C_A    | 944E>X | Substitution | Nonsense             | 16% |
| MM12T | C1orf200  | chromosome 1 open reading frame 200             | ENST00000377320 | chr1_9714413-9714413_C_T      | 28V>I  | Substitution | Nonsynonymous coding | 12% |
| MM12T | C1ORF224  | -                                               | ENST00000414055 | chr1_16543026-16543026_G_A    | 38R>X  | Substitution | Nonsense             | 15% |
| MM12T | C1orf228  | chromosome 1 open reading frame 228             | NM_001145636    | chr1_45162839-45162839_G_A    | 91S>N  | Substitution | Nonsynonymous coding | 11% |
| MM12T | C1orf229  | chromosome 1 open reading frame 229             | CCDS1630.1      | chr1_247275319-247275319_G_A  | 70P>S  | Substitution | Nonsynonymous coding | 40% |
| MM12T | C1orf50   | chromosome 1 open reading frame 50              | CCDS473.1       | chr1_43233248-43233248_G_A    | 50A>T  | Substitution | Nonsynonymous coding | 11% |
| MM12T | C1orf65   | chromosome 1 open reading frame 65              | CCDS1537.1      | chr1_223568328-223568328_G_T  | 504R>I | Substitution | Nonsynonymous coding | 12% |
| MM12T | C1orf95   | chromosome 1 open reading frame 95              | CCDS31044.1     | chr1_226784565-226784565_G_A  | 89V>M  | Substitution | Nonsynonymous coding | 31% |
| MM12T | C1qTNF5   | C1q and tumor necrosis factor related protein 5 | CCDS8420.1      | chr11_119210099-119210099_C_T | 225S>N | Substitution | Nonsynonymous coding | 11% |
| MM12T | C1RL-AS1  | C1RL antisense RNA 1                            | ENST00000382215 | chr12_7272127-7272127_G_A     | 3A>T   | Substitution | Nonsynonymous coding | 32% |
| MM12T | C1RL-AS1  | C1RL antisense RNA 1                            | ENST00000382215 | chr12_7274419-7274419_G_A     | 87W>X  | Substitution | Nonsense             | 12% |
| MM12T | C20orf112 | chromosome 20 open reading frame 112            | ENST00000201961 | chr20_31108722-31108722_C_T   | 67A>T  | Substitution | Nonsynonymous coding | 11% |
| MM12T | C20orf112 | chromosome 20 open reading frame 112            | ENST00000201961 | chr20_31115598-31115598_G_A   | 53A>V  | Substitution | Nonsynonymous coding | 33% |

|       |          |                                             |                 |                              |         |              |                      |     |
|-------|----------|---------------------------------------------|-----------------|------------------------------|---------|--------------|----------------------|-----|
| MM12T | C2orf194 | chromosome 20 open reading frame 194        | CCDS42851.1     | chr20_3234371-3234371_C_T    | ISV+1>  | Substitution | Splice site donor    | 38% |
| MM12T | C2orf26  | chromosome 20 open reading frame 26         | CCDS33447.1     | chr20_20079311-20079311_G_T  | 238A>S  | Substitution | Nonsynonymous coding | 33% |
| MM12T | C21orf59 | chromosome 21 open reading frame 59         | CCDS13617.1     | chr21_33974665-33974665_C_T  | 227A>T  | Substitution | Nonsynonymous coding | 13% |
| MM12T | C21orf59 | chromosome 21 open reading frame 59         | CCDS13617.1     | chr21_33982189-33982189_G_A  | 89A>V   | Substitution | Nonsynonymous coding | 39% |
| MM12T | C21orf91 | chromosome 21 open reading frame 91         | CCDS42907.1     | chr21_19169024-19169024_G_A  | 180A>V  | Substitution | Nonsynonymous coding | 13% |
| MM12T | C22orf28 | chromosome 22 open reading frame 28         | CCDS13905.1     | chr22_32792233-32792233_G_A  | 273A>V  | Substitution | Nonsynonymous coding | 34% |
| MM12T | C22orf31 | chromosome 22 open reading frame 31         | CCDS13848.1     | chr22_29455064-29455064_G_A  | 180T>I  | Substitution | Nonsynonymous coding | 21% |
| MM12T | C2CD2    | C2 calcium-dependent domain containing 2    | CCDS42933.1     | chr21_43321727-43321727_G_A  | ISV+4>  | Substitution | Splice site donor    | 42% |
| MM12T | C2CD4B   | C2 calcium-dependent domain containing 4B   | CCDS32259.1     | chr15_62457174-62457174_G_T  | 4L>I    | Substitution | Nonsynonymous coding | 31% |
| MM12T | C2orf16  | chromosome 2 open reading frame 16          | CCDS42666.1     | chr2_27800626-27800626_G_A   | 396G>E  | Substitution | Nonsynonymous coding | 20% |
| MM12T | C2orf16  | chromosome 2 open reading frame 16          | CCDS42666.1     | chr2_27802186-27802186_G_A   | 916R>K  | Substitution | Nonsynonymous coding | 15% |
| MM12T | C2orf40  | chromosome 2 open reading frame 40          | CCDS2072.1      | chr2_106690369-106690369_C_T | 52A>V   | Substitution | Nonsynonymous coding | 11% |
| MM12T | C2orf61  | chromosome 2 open reading frame 61          | CCDS1831.1      | chr2_47380109-47380109_C_A   | 43R>I   | Substitution | Nonsynonymous coding | 30% |
| MM12T | C2orf66  | chromosome 2 open reading frame 66          | CCDS2317.1      | chr2_197674092-197674092_C_T | 7R>H    | Substitution | Nonsynonymous coding | 35% |
| MM12T | C3orf36  | chromosome 3 open reading frame 36          | CCDS3083.1      | chr3_133647302-133647302_C_T | 116A>T  | Substitution | Nonsynonymous coding | 19% |
| MM12T | C3orf36  | chromosome 3 open reading frame 36          | CCDS3083.1      | chr3_133647521-133647521_C_A | 43G>X   | Substitution | Nonsense             | 33% |
| MM12T | C3orf58  | chromosome 3 open reading frame 58          | CCDS3130.1      | chr3_143708657-143708657_G_T | 423A>S  | Substitution | Nonsynonymous coding | 37% |
| MM12T | C3orf58  | chromosome 3 open reading frame 58          | CCDS3130.1      | chr3_143708675-143708675_G_A | 429V>M  | Substitution | Nonsynonymous coding | 29% |
| MM12T | C4B      | complement component 4B (Chido blood group) | CCDS47405.1     | chr6_31996582-31996582_G_A   | 1115G>S | Substitution | Nonsynonymous coding | 13% |
| MM12T | C5       | complement component 5                      | CCDS6826.1      | chr9_123779729-123779729_C_T | 593A>T  | Substitution | Nonsynonymous coding | 15% |
| MM12T | C5AR2    | complement component 5a receptor 2          | CCDS12699.1     | chr19_47844955-47844955_G_A  | 300R>H  | Substitution | Nonsynonymous coding | 31% |
| MM12T | C5orf45  | chromosome 5 open reading frame 45          | CCDS34319.1     | chr5_179271150-179271150_A_G | ISV+2>  | Substitution | Splice site donor    | 13% |
| MM12T | C5orf54  | chromosome 5 open reading frame 54          | CCDS34283.1     | chr5_159822202-159822202_G_A | 99A>V   | Substitution | Nonsynonymous coding | 11% |
| MM12T | C5orf54  | chromosome 5 open reading frame 54          | CCDS34283.1     | chr5_159822419-159822419_G_A | 27R>C   | Substitution | Nonsynonymous coding | 31% |
| MM12T | C5orf56  | chromosome 5 open reading frame 56          | ENST00000378947 | chr5_131792784-131792784_C_T | 57P>S   | Substitution | Nonsynonymous coding | 36% |
| MM12T | C6       | complement component 6                      | CCDS3936.1      | chr5_41172398-41172398_C_T   | 407R>H  | Substitution | Nonsynonymous coding | 18% |
| MM12T | C6       | complement component 6                      | CCDS3936.1      | chr5_41195957-41195957_C_A   | 175R>M  | Substitution | Nonsynonymous coding | 23% |
| MM12T | C6orf15  | chromosome 6 open reading frame 15          | CCDS4693.1      | chr6_31080293-31080293_G_T   | 14L>M   | Substitution | Nonsynonymous coding | 23% |
| MM12T | C6orf211 | chromosome 6 open reading frame 211         | CCDS5233.1      | chr6_151785651-151785651_G_T | 152Q>H  | Substitution | Nonsynonymous coding | 10% |
| MM12T | C6orf48  | chromosome 6 open reading frame 48          | ENST00000375637 | chr6_31803208-31803208_C_T   | 91A>V   | Substitution | Nonsynonymous coding | 35% |
| MM12T | C7orf10  | chromosome 7 open reading frame 10          | NM_024728       | chr7_40314173-40314173_A_G   | 183Y>C  | Substitution | Nonsynonymous coding | 33% |
| MM12T | C7orf57  | chromosome 7 open reading frame 57          | CCDS47583.1     | chr7_48092305-48092305_A_    | NA      | Deletion     | Frameshift           | 37% |

|       |          |                                                              |                 |                              |         |              |                      |     |
|-------|----------|--------------------------------------------------------------|-----------------|------------------------------|---------|--------------|----------------------|-----|
| MM12T | C8orf33  | chromosome 8 open reading frame 33                           | CCDS34974.1     | chr8_146278786-146278786_G_T | 169Q>H  | Substitution | Nonsynonymous coding | 31% |
| MM12T | C8orf34  | chromosome 8 open reading frame 34                           | ENST00000325233 | chr8_69537840-69537840_C_T   | 10T>I   | Substitution | Nonsynonymous coding | 32% |
| MM12T | C8orf4   | chromosome 8 open reading frame 4                            | CCDS6115.1      | chr8_40011077-40011077_C_T   | 9A>V    | Substitution | Nonsynonymous coding | 28% |
| MM12T | C8orf46  | chromosome 8 open reading frame 46                           | CCDS6191.2      | chr8_67428268-67428268_C_A   | 194S>Y  | Substitution | Nonsynonymous coding | 32% |
| MM12T | C8orf82  | chromosome 8 open reading frame 82                           | CCDS34970.1     | chr8_145752824-145752824_C_T | 185G>S  | Substitution | Nonsynonymous coding | 41% |
| MM12T | C8orf86  | chromosome 8 open reading frame 86                           | CCDS6108.1      | chr8_38385956-38385956_C_T   | 67G>D   | Substitution | Nonsynonymous coding | 16% |
| MM12T | C9orf142 | chromosome 9 open reading frame 142                          | CCDS7020.1      | chr9_139887666-139887666_G_A | 131R>H  | Substitution | Nonsynonymous coding | 31% |
| MM12T | C9orf169 | chromosome 9 open reading frame 169                          | CCDS48064.1     | chr9_140120281-140120281_A_G | 70K>E   | Substitution | Nonsynonymous coding | 31% |
| MM12T | C9orf3   | chromosome 9 open reading frame 3                            | CCDS6713.1      | chr9_97522520-97522520_C_T   | 152S>F  | Substitution | Nonsynonymous coding | 32% |
| MM12T | C9orf3   | chromosome 9 open reading frame 3                            | CCDS6713.1      | chr9_97535446-97535446_G_A   | 320W>X  | Substitution | Nonsense             | 35% |
| MM12T | CA10     | carbonic anhydrase X                                         | CCDS32684.1     | chr17_49726552-49726552_T_C  | 209T>A  | Substitution | Nonsynonymous coding | 31% |
| MM12T | CA11     | carbonic anhydrase XI                                        | CCDS12729.1     | chr19_49143106-49143106_C_T  | 169G>E  | Substitution | Nonsynonymous coding | 32% |
| MM12T | CA12     | carbonic anhydrase XII                                       | CCDS10185.1     | chr15_63673861-63673861_T_C  | 20Q>R   | Substitution | Nonsynonymous coding | 25% |
| MM12T | CA14     | carbonic anhydrase XIV                                       | CCDS947.1       | chr1_150232570-150232570_A_G | ISV+4>  | Substitution | Splice site donor    | 60% |
| MM12T | CA8      | carbonic anhydrase VIII                                      | CCDS6174.1      | chr8_61144920-61144920_T_C   | 146N>D  | Substitution | Nonsynonymous coding | 37% |
| MM12T | CABIN1   | calcineurin binding protein 1                                | CCDS13823.1     | chr22_24458422-24458422_A_G  | 544M>V  | Substitution | Nonsynonymous coding | 31% |
| MM12T | CABP2    | calcium binding protein 2                                    | CCDS8170.1      | chr11_67287533-67287533_C_T  | 160A>T  | Substitution | Nonsynonymous coding | 11% |
| MM12T | CACNA1B  | calcium channel, voltage-dependent, N type, alpha 1B subunit | NM_000718       | chr9_140952560-140952560_G_A | 1389R>H | Substitution | Nonsynonymous coding | 28% |
| MM12T | CACNA1C  | calcium channel, voltage-dependent, L type, alpha 1C subunit | CCDS44788.1     | chr12_2719707-2719707_C_T    | 1207R>X | Substitution | Nonsense             | 44% |
| MM12T | CACNA1D  | calcium channel, voltage-dependent, L type, alpha 1D subunit | CCDS2872.1      | chr3_53757478-53757478_C_A   | 582L>I  | Substitution | Nonsynonymous coding | 22% |
| MM12T | CACNA1G  | calcium channel, voltage-dependent, T type, alpha 1G subunit | CCDS45730.1     | chr17_48669350-48669350_C_T  | 936T>M  | Substitution | Nonsynonymous coding | 23% |
| MM12T | CACNA1G  | calcium channel, voltage-dependent, T type, alpha 1G subunit | CCDS45730.1     | chr17_48701762-48701762_T_C  | 2091Y>H | Substitution | Nonsynonymous coding | 35% |
| MM12T | CACNA1G  | calcium channel, voltage-dependent, T type, alpha 1G subunit | CCDS45730.1     | chr17_48704012-48704012_C_T  | 2345A>V | Substitution | Nonsynonymous coding | 26% |
| MM12T | CACNA1I  | calcium channel, voltage-dependent, T type, alpha 1I subunit | CCDS46710.1     | chr22_40037071-40037071_G_A  | 314G>S  | Substitution | Nonsynonymous coding | 34% |
| MM12T | CACNA1I  | calcium channel, voltage-dependent, T type, alpha 1I subunit | CCDS46710.1     | chr22_40069076-40069076_G_A  | 1591R>H | Substitution | Nonsynonymous coding | 26% |
| MM12T | CACNA1S  | calcium channel, voltage-dependent, L type, alpha 1S subunit | CCDS1407.1      | chr1_201022685-201022685_C_T | 1233A>T | Substitution | Nonsynonymous coding | 28% |
| MM12T | CACNA1S  | calcium channel, voltage-dependent, L type, alpha 1S subunit | CCDS1407.1      | chr1_201047160-201047160_C_T | 489R>H  | Substitution | Nonsynonymous coding | 30% |
| MM12T | CACNA1S  | calcium channel, voltage-dependent, L type, alpha 1S subunit | CCDS1407.1      | chr1_201060864-201060864_C_T | 200A>T  | Substitution | Nonsynonymous coding | 10% |
| MM12T | CACNA2D2 | calcium channel, voltage-dependent, alpha 2/delta subunit 2  | CCDS33763.1     | chr3_50416524-50416524_G_A   | 420T>M  | Substitution | Nonsynonymous coding | 12% |
| MM12T | CACNA2D2 | calcium channel, voltage-dependent, alpha 2/delta subunit 2  | CCDS33763.1     | chr3_50416963-50416963_C_T   | 351R>H  | Substitution | Nonsynonymous coding | 13% |
| MM12T | CACNA2D3 | calcium channel, voltage-dependent, alpha 2/delta subunit 3  | NM_018398       | chr3_54596915-54596915_G_A   | 211W>X  | Substitution | Nonsense             | 16% |
| MM12T | CACNA2D4 | calcium channel, voltage-dependent, alpha 2/delta subunit 4  | CCDS44785.1     | chr12_1904848-1904848_G_A    | 1071A>V | Substitution | Nonsynonymous coding | 11% |

|       |            |                                                                                  |                 |                               |         |              |                      |     |
|-------|------------|----------------------------------------------------------------------------------|-----------------|-------------------------------|---------|--------------|----------------------|-----|
| MM12T | CACNA2D4   | calcium channel, voltage-dependent, alpha 2/delta subunit 4                      | CCDS44785.1     | chr12_1993423-1993423_G_A     | 446A>V  | Substitution | Nonsynonymous coding | 32% |
| MM12T | CACNB1     | calcium channel, voltage-dependent, beta 1 subunit                               | CCDS42311.1     | chr17_37343848-37343848_G_A   | 100P>S  | Substitution | Nonsynonymous coding | 34% |
| MM12T | CACNB3     | calcium channel, voltage-dependent, beta 3 subunit                               | CCDS8769.1      | chr12_49220834-49220834_C_A   | 356Y>X  | Substitution | Nonsense             | 32% |
| MM12T | CACNG3     | calcium channel, voltage-dependent, gamma subunit 3                              | CCDS10620.1     | chr16_24372936-24372936_C_T   | 234R>W  | Substitution | Nonsynonymous coding | 30% |
| MM12T | CACNG5     | calcium channel, voltage-dependent, gamma subunit 5                              | CCDS11666.1     | chr17_64880774-64880774_C_T   | 189T>M  | Substitution | Nonsynonymous coding | 26% |
| MM12T | CAD        | carbamoyl-phosphate synthetase 2, aspartate transcarbamylase, and dihydroorotase | CCDS1742.1      | chr2_27455949-27455949_A_G    | 978T>A  | Substitution | Nonsynonymous coding | 34% |
| MM12T | CAD        | carbamoyl-phosphate synthetase 2, aspartate transcarbamylase, and dihydroorotase | CCDS1742.1      | chr2_27461033-27461033_G_A    | 1613C>Y | Substitution | Nonsynonymous coding | 43% |
| MM12T | CAD        | carbamoyl-phosphate synthetase 2, aspartate transcarbamylase, and dihydroorotase | CCDS1742.1      | chr2_27449521-27449521_C_T    | ISV+4>  | Substitution | Splice site donor    | 36% |
| MM12T | CAD        | carbamoyl-phosphate synthetase 2, aspartate transcarbamylase, and dihydroorotase | CCDS1742.1      | chr2_27445832-27445832_C_T    | 246R>X  | Substitution | Nonsense             | 29% |
| MM12T | CADM4      | cell adhesion molecule 4                                                         | CCDS12627.1     | chr19_44130371-44130371_C_T   | 190R>H  | Substitution | Nonsynonymous coding | 32% |
| MM12T | CADPS      | Ca <sup>++</sup> -dependent secretion activator                                  | CCDS46858.1     | chr3_62484866-62484866_G_T    | 893L>I  | Substitution | Nonsynonymous coding | 31% |
| MM12T | CALB1      | calbindin 1, 28kDa                                                               | CCDS6251.1      | chr8_91072928-91072928_C_A    | 201D>Y  | Substitution | Nonsynonymous coding | 25% |
| MM12T | CALCOCO1   | calcium binding and coiled-coil domain 1                                         | CCDS8864.1      | chr12_54110058-54110058_C_T   | 331A>T  | Substitution | Nonsynonymous coding | 13% |
| MM12T | CALD1      | caldesmon 1                                                                      | CCDS5835.1      | chr7_134617816-134617816_G_A  | 99R>H   | Substitution | Nonsynonymous coding | 33% |
| MM12T | CALHM3     | calcium homeostasis modulator 3                                                  | CCDS44476.1     | chr10_105236136-105236136_G_A | 153A>V  | Substitution | Nonsynonymous coding | 17% |
| MM12T | CALML3-AS1 | CALML3 antisense RNA 1                                                           | ENST00000380330 | chr10_5558054-5558054_G_A     | 61P>S   | Substitution | Nonsynonymous coding | 11% |
| MM12T | CALN1      | calneuron 1                                                                      | CCDS47603.1     | chr7_71868322-71868322_C_A    | 11K>N   | Substitution | Nonsynonymous coding | 40% |
| MM12T | CALR       | calreticulin                                                                     | CCDS12288.1     | chr19_13054364-13054364_C_T   | 325T>I  | Substitution | Nonsynonymous coding | 24% |
| MM12T | CAMKK2     | calcium/calmodulin-dependent protein kinase kinase 2, beta                       | CCDS9216.1      | chr12_121678660-121678660_G_A | 537R>X  | Substitution | Nonsense             | 28% |
| MM12T | CAMKV      | CaM kinase-like vesicle-associated                                               | CCDS33762.1     | chr3_49897686-49897686_G_T    | 287S>Y  | Substitution | Nonsynonymous coding | 38% |
| MM12T | CAMSAP2    | calmodulin regulated spectrin-associated protein family, member 2                | CCDS1404.1      | chr1_200811194-200811194_C_T  | 334R>C  | Substitution | Nonsynonymous coding | 33% |
| MM12T | CAMTA1     | calmodulin binding transcription activator 1                                     | CCDS30576.1     | chr1_6885274-6885274_G_A      | ISV+4>  | Substitution | Splice site donor    | 15% |
| MM12T | CAND2      | cullin-associated and neddylation-dissociated 2 (putative)                       | CCDS43053.1     | chr3_12858079-12858079_C_T    | 457R>W  | Substitution | Nonsynonymous coding | 36% |
| MM12T | CAPN12     | calpain 12                                                                       | CCDS12519.1     | chr19_39228979-39228979_C_T   | 300R>H  | Substitution | Nonsynonymous coding | 33% |
| MM12T | CAPN5      | calpain 5 [Source:HGNC Symbol;Acc:1482]                                          | CCDS8248.1      | chr11_76823833-76823833_G_A   | 166A>T  | Substitution | Nonsynonymous coding | 27% |
| MM12T | CAPZA3     | capping protein (actin filament) muscle Z-line, alpha 3                          | CCDS8681.1      | chr12_18891987-18891987_T_A   | 262V>E  | Substitution | Nonsynonymous coding | 11% |
| MM12T | CAPZB      | capping protein (actin filament) muscle Z-line, beta                             | NM_004930       | chr1_19746205-19746205_G_A    | 15R>C   | Substitution | Nonsynonymous coding | 27% |
| MM12T | CARD6      | caspase recruitment domain family, member 6                                      | CCDS3935.1      | chr5_40843608-40843608_A_T    | 213E>V  | Substitution | Nonsynonymous coding | 17% |
| MM12T | CARNS1     | carnosine synthase 1                                                             | CCDS44658.1     | chr11_67191779-67191779_C_T   | 731R>C  | Substitution | Nonsynonymous coding | 69% |
| MM12T | CARS       | cysteinyI-tRNA synthetase                                                        | CCDS41600.1     | chr11_3059352-3059352_C_A     | 243Q>H  | Substitution | Nonsynonymous coding | 40% |
| MM12T | CASD1      | CAS1 domain containing 1                                                         | CCDS5636.1      | chr7_94183816-94183816_A_T    | 686R>X  | Substitution | Nonsense             | 12% |
| MM12T | CASK       | calcium/calmodulin-dependent serine protein kinase (MAGUK family)                | CCDS14257.1     | chrX_41394037-41394037_C_T    | 742A>T  | Substitution | Nonsynonymous coding | 11% |

|       |          |                                                                       |                 |                               |         |              |                      |     |
|-------|----------|-----------------------------------------------------------------------|-----------------|-------------------------------|---------|--------------|----------------------|-----|
| MM12T | CASKIN1  | CASK interacting protein 1                                            | CCDS42103.1     | chr16_2229851-2229851_C_A     | 1173G>V | Substitution | Nonsynonymous coding | 10% |
| MM12T | CASKIN1  | CASK interacting protein 1                                            | CCDS42103.1     | chr16_2230128-2230128_G_A     | 1081P>S | Substitution | Nonsynonymous coding | 32% |
| MM12T | CASKIN2  | CASK interacting protein 2                                            | CCDS11723.1     | chr17_73498339-73498339_G_A   | 939T>M  | Substitution | Nonsynonymous coding | 29% |
| MM12T | CASKIN2  | CASK interacting protein 2                                            | CCDS11723.1     | chr17_73499831-73499831_G_A   | 530A>V  | Substitution | Nonsynonymous coding | 39% |
| MM12T | CASP8AP2 | caspase 8 associated protein 2                                        | NM_001137667    | chr6_90577649-90577649_G_A    | 1547R>H | Substitution | Nonsynonymous coding | 14% |
| MM12T | CASR     | calcium-sensing receptor                                              | CCDS3010.1      | chr3_122003398-122003398_G_A  | 866R>H  | Substitution | Nonsynonymous coding | 32% |
| MM12T | CAST     | calpastatin                                                           | CCDS43342.1     | chr5_96084271-96084271_G_A    | 461R>Q  | Substitution | Nonsynonymous coding | 34% |
| MM12T | CAT      | catalase                                                              | CCDS7891.1      | chr11_34477715-34477715_A_T   | 290E>V  | Substitution | Nonsynonymous coding | 10% |
| MM12T | CATSPER1 | cation channel, sperm associated 1                                    | CCDS8127.1      | chr11_65788380-65788380_G_A   | 610P>L  | Substitution | Nonsynonymous coding | 16% |
| MM12T | CATSPERD | catsper channel auxiliary subunit delta                               | CCDS12149.2     | chr19_5739383-5739383_C_T     | 169S>F  | Substitution | Nonsynonymous coding | 26% |
| MM12T | CBFA2T3  | core-binding factor, runt domain, alpha subunit 2; translocated to, 3 | CCDS10972.1     | chr16_88943469-88943469_G_A   | 626A>V  | Substitution | Nonsynonymous coding | 15% |
| MM12T | CBL      | Cbl proto-oncogene, E3 ubiquitin protein ligase                       | CCDS8418.1      | chr11_119149290-119149290_C_T | 433P>L  | Substitution | Nonsynonymous coding | 25% |
| MM12T | CBLN3    | cerebellin 3 precursor                                                | CCDS32057.1     | chr14_24897550-24897550_C_T   | 121R>Q  | Substitution | Nonsynonymous coding | 29% |
| MM12T | CBR1     | carbonyl reductase 1                                                  | ENST0000399191  | chr21_37444556-37444556_C_T   | 161S>L  | Substitution | Nonsynonymous coding | 32% |
| MM12T | CBX4     | chromobox homolog 4                                                   | CCDS32758.1     | chr17_77808836-77808836_G_A   | 202A>V  | Substitution | Nonsynonymous coding | 12% |
| MM12T | CC2D1A   | coiled-coil and C2 domain containing 1A                               | CCDS42512.1     | chr19_14023203-14023203_G_T   | 88E>D   | Substitution | Nonsynonymous coding | 38% |
| MM12T | CC2D1B   | coiled-coil and C2 domain containing 1B                               | ENST00000371573 | chr1_52818889-52818889_C_T    | 519A>T  | Substitution | Nonsynonymous coding | 25% |
| MM12T | CC2D2A   | coiled-coil and C2 domain containing 2A                               | CCDS47026.1     | chr4_15517577-15517577_G_A    | 323A>T  | Substitution | Nonsynonymous coding | 13% |
| MM12T | CC2D2B   | coiled-coil and C2 domain containing 2B                               | CCDS41555.1     | chr10_97772440-97772440_C_A   | 91P>H   | Substitution | Nonsynonymous coding | 27% |
| MM12T | CCDC106  | coiled-coil domain containing 106                                     | CCDS33118.1     | chr19_56163879-56163879_G_A   | 204E>K  | Substitution | Nonsynonymous coding | 32% |
| MM12T | CCDC108  | coiled-coil domain containing 108                                     | CCDS2430.2      | chr2_219874072-219874072_G_C  | 1521C>W | Substitution | Nonsynonymous coding | 15% |
| MM12T | CCDC108  | coiled-coil domain containing 108                                     | CCDS2430.2      | chr2_219885905-219885905_C_T  | 1076W>X | Substitution | Nonsense             | 40% |
| MM12T | CCDC112  | coiled-coil domain containing 112                                     | CCDS34213.1     | chr5_114607059-114607059_A_G  | 395F>L  | Substitution | Nonsynonymous coding | 13% |
| MM12T | CCDC113  | coiled-coil domain containing 113                                     | CCDS10795.1     | chr16_58292357-58292357_C_T   | 159S>F  | Substitution | Nonsynonymous coding | 10% |
| MM12T | CCDC116  | coiled-coil domain containing 116                                     | CCDS13791.1     | chr22_21987538-21987538_C_T   | 23A>V   | Substitution | Nonsynonymous coding | 48% |
| MM12T | CCDC116  | coiled-coil domain containing 116                                     | CCDS13791.1     | chr22_21988641-21988641_C_T   | 135R>W  | Substitution | Nonsynonymous coding | 34% |
| MM12T | CCDC116  | coiled-coil domain containing 116                                     | CCDS13791.1     | chr22_21988657-21988657_C_T   | 140P>L  | Substitution | Nonsynonymous coding | 23% |
| MM12T | CCDC116  | coiled-coil domain containing 116                                     | CCDS13791.1     | chr22_21988734-21988734_G_A   | 166A>T  | Substitution | Nonsynonymous coding | 15% |
| MM12T | CCDC127  | coiled-coil domain containing 127                                     | CCDS3852.1      | chr5_205864-205864_G_A        | 111R>C  | Substitution | Nonsynonymous coding | 35% |
| MM12T | CCDC137  | coiled-coil domain containing 137                                     | CCDS42400.1     | chr17_79637467-79637467__A    | NA      | Insertion    | Frameshift           | 15% |
| MM12T | CCDC141  | coiled-coil domain containing 141                                     | CCDS2281.1      | chr2_179736886-179736886_C_T  | 110A>T  | Substitution | Nonsynonymous coding | 21% |
| MM12T | CCDC147  | coiled-coil domain containing 147                                     | CCDS31282.1     | chr10_106166524-106166524_G_T | 743E>D  | Substitution | Nonsynonymous coding | 17% |

|       |         |                                        |                 |                               |         |              |                      |     |
|-------|---------|----------------------------------------|-----------------|-------------------------------|---------|--------------|----------------------|-----|
| MM12T | CCDC147 | coiled-coil domain containing 147      | CCDS31282.1     | chr10_106214226-106214226_C_T | 853P>S  | Substitution | Nonsynonymous coding | 24% |
| MM12T | CCDC147 | coiled-coil domain containing 147      | CCDS31282.1     | chr10_106128310-106128310_G_T | 308E>X  | Substitution | Nonsense             | 28% |
| MM12T | CCDC148 | coiled-coil domain containing 148      | CCDS33304.1     | chr2_159077168-159077168_G_A  | 437L>F  | Substitution | Nonsynonymous coding | 13% |
| MM12T | CCDC158 | coiled-coil domain containing 158      | CCDS43242.1     | chr4_77250101-77250101_C_T    | 984A>T  | Substitution | Nonsynonymous coding | 17% |
| MM12T | CCDC158 | coiled-coil domain containing 158      | CCDS43242.1     | chr4_77252521-77252521_C_T    | 969S>N  | Substitution | Nonsynonymous coding | 11% |
| MM12T | CCDC164 | coiled-coil domain containing 164      | ENST00000439066 | chr2_26671259-26671259_G_A    | 11V>I   | Substitution | Nonsynonymous coding | 38% |
| MM12T | CCDC17  | coiled-coil domain containing 17       | CCDS44131.1     | chr1_46088296-46088296_C_A    | 230G>C  | Substitution | Nonsynonymous coding | 34% |
| MM12T | CCDC174 | coiled-coil domain containing 174      | CCDS2620.2      | chr3_14708937-14708937_G_A    | 244R>Q  | Substitution | Nonsynonymous coding | 36% |
| MM12T | CCDC176 | coiled-coil domain containing 176      | CCDS32119.2     | chr14_74486219-74486219_G_A   | 135>N   | Substitution | Nonsynonymous coding | 10% |
| MM12T | CCDC24  | coiled-coil domain containing 24       | CCDS507.1       | chr1_44457899-44457899_G_A    | 48A>T   | Substitution | Nonsynonymous coding | 11% |
| MM12T | CCDC34  | coiled-coil domain containing 34       | CCDS31448.1     | chr11_27362359-27362359_T_A   | 264E>V  | Substitution | Nonsynonymous coding | 14% |
| MM12T | CCDC40  | coiled-coil domain containing 40       | CCDS42395.1     | chr17_78069153-78069153_C_T   | 975A>V  | Substitution | Nonsynonymous coding | 20% |
| MM12T | CCDC40  | coiled-coil domain containing 40       | CCDS42395.1     | chr17_78073389-78073389_C_T   | 1082R>C | Substitution | Nonsynonymous coding | 12% |
| MM12T | CCDC47  | coiled-coil domain containing 47       | CCDS11643.1     | chr17_61842197-61842197_G_A   | 92T>I   | Substitution | Nonsynonymous coding | 19% |
| MM12T | CCDC50  | coiled-coil domain containing 50       | CCDS33912.1     | chr3_191078926-191078926_G_A  | 103R>H  | Substitution | Nonsynonymous coding | 12% |
| MM12T | CCDC64B | coiled-coil domain containing 64B      | CCDS45393.1     | chr16_3081028-3081028_G_A     | 136R>C  | Substitution | Nonsynonymous coding | 29% |
| MM12T | CCDC70  | coiled-coil domain containing 70       | CCDS9431.1      | chr13_52440019-52440019_G_A   | 169A>T  | Substitution | Nonsynonymous coding | 13% |
| MM12T | CCDC78  | coiled-coil domain containing 78       | CCDS32353.1     | chr16_774695-774695_C_T       | 251A>T  | Substitution | Nonsynonymous coding | 10% |
| MM12T | CCDC85C | coiled-coil domain containing 85C      | CCDS45161.1     | chr14_99983505-99983505_C_T   | 331A>T  | Substitution | Nonsynonymous coding | 38% |
| MM12T | CCDC88B | coiled-coil domain containing 88B      | CCDS8072.2      | chr11_64118723-64118723_G_A   | 985R>H  | Substitution | Nonsynonymous coding | 18% |
| MM12T | CCDC88B | coiled-coil domain containing 88B      | CCDS8072.2      | chr11_64119821-64119821_C_T   | 1107R>W | Substitution | Nonsynonymous coding | 20% |
| MM12T | CCDC88B | coiled-coil domain containing 88B      | CCDS8072.2      | chr11_64120704-64120704_C_G   | 1227Q>E | Substitution | Nonsynonymous coding | 12% |
| MM12T | CCDC88B | coiled-coil domain containing 88B      | CCDS8072.2      | chr11_64121210-64121210_G_A   | 1286R>H | Substitution | Nonsynonymous coding | 12% |
| MM12T | CCDC88C | coiled-coil domain containing 88C      | CCDS45151.1     | chr14_91739847-91739847_C_T   | 1737A>T | Substitution | Nonsynonymous coding | 29% |
| MM12T | CCDC88C | coiled-coil domain containing 88C      | CCDS45151.1     | chr14_91808751-91808751_C_A   | 152Q>H  | Substitution | Nonsynonymous coding | 32% |
| MM12T | CCDC92  | coiled-coil domain containing 92       | CCDS9256.1      | chr12_124427914-124427914_C_T | 54R>Q   | Substitution | Nonsynonymous coding | 26% |
| MM12T | CCDC93  | coiled-coil domain containing 93       | CCDS2121.2      | chr2_118704407-118704407_C_T  | 426A>T  | Substitution | Nonsynonymous coding | 25% |
| MM12T | CCL17   | chemokine (C-C motif) ligand 17        | CCDS10780.1     | chr16_57449049-57449049_C_T   | 43P>S   | Substitution | Nonsynonymous coding | 31% |
| MM12T | CCM2    | cerebral cavernous malformation 2      | CCDS34630.1     | chr7_45115589-45115589_G_A    | 444R>H  | Substitution | Nonsynonymous coding | 11% |
| MM12T | CCM2L   | cerebral cavernous malformation 2-like | ENST00000300415 | chr20_30618809-30618809_C_T   | 470R>W  | Substitution | Nonsynonymous coding | 36% |
| MM12T | CCNA1   | cyclin A1                              | CCDS9357.1      | chr13_37012842-37012842_G_A   | 244R>H  | Substitution | Nonsynonymous coding | 18% |
| MM12T | CCNDBP1 | cyclin D-type binding-protein 1        | CCDS10092.1     | chr15_43486617-43486617_C_T   | 309A>V  | Substitution | Nonsynonymous coding | 39% |



|       |          |                                                                  |                 |                               |         |              |                      |     |
|-------|----------|------------------------------------------------------------------|-----------------|-------------------------------|---------|--------------|----------------------|-----|
| MM12T | CCNF     | cyclin F                                                         | CCDS10467.1     | chr16_2487219-2487219_G_A     | 146A>T  | Substitution | Nonsynonymous coding | 34% |
| MM12T | CCP110   | centriolar coiled coil protein 110kDa                            | CCDS10579.1     | chr16_19548126-19548126_C_T   | 379R>C  | Substitution | Nonsynonymous coding | 17% |
| MM12T | CCR10    | chemokine (C-C motif) receptor 10                                | CCDS11435.1     | chr17_40832247-40832247_C_T   | 138R>H  | Substitution | Nonsynonymous coding | 22% |
| MM12T | CCR10    | chemokine (C-C motif) receptor 10                                | CCDS11435.1     | chr17_40832502-40832502_G_A   | 53A>V   | Substitution | Nonsynonymous coding | 30% |
| MM12T | CCR9     | chemokine (C-C motif) receptor 9                                 | CCDS2732.1      | chr3_45943064-45943064_G_A    | 262V>I  | Substitution | Nonsynonymous coding | 12% |
| MM12T | CCSER1   | coiled-coil serine-rich protein 1                                | CCDS47099.1     | chr4_91321226-91321226_G_T    | 517D>Y  | Substitution | Nonsynonymous coding | 33% |
| MM12T | CCT3     | chaperonin containing TCP1, subunit 3 (gamma)                    | CCDS1140.2      | chr1_156286993-156286993_C_T  | 313R>H  | Substitution | Nonsynonymous coding | 17% |
| MM12T | CCT5     | chaperonin containing TCP1, subunit 5 (epsilon)                  | CCDS3877.1      | chr5_10260992-10260992_C_T    | 321A>V  | Substitution | Nonsynonymous coding | 40% |
| MM12T | CCT6B    | chaperonin containing TCP1, subunit 6B (zeta 2)                  | CCDS32617.1     | chr17_33255086-33255086_C_T   | 525G>E  | Substitution | Nonsynonymous coding | 13% |
| MM12T | CCT8L1P  | chaperonin containing TCP1, subunit 8 (theta)-like 1, pseudogene | ENST00000021776 | chr7_152143294-152143294_G_A  | 245A>T  | Substitution | Nonsynonymous coding | 44% |
| MM12T | CD163L1  | CD163 molecule-like 1                                            | CCDS8577.1      | chr12_7548829-7548829_C_T     | 638A>T  | Substitution | Nonsynonymous coding | 12% |
| MM12T | CD19     | CD19 molecule                                                    | CCDS10644.1     | chr16_28948588-28948588_C_A   | ISV-4>  | Substitution | Splice site acceptor | 24% |
| MM12T | CD248    | CD248 molecule, endosialin                                       | CCDS8134.1      | chr11_66083430-66083430_C_T   | 357G>S  | Substitution | Nonsynonymous coding | 36% |
| MM12T | CD300LB  | CD300 molecule-like family member b                              | CCDS11700.1     | chr17_72522003-72522003_C_T   | 122R>H  | Substitution | Nonsynonymous coding | 16% |
| MM12T | CD300LG  | CD300 molecule-like family member g                              | CCDS11470.1     | chr17_41930333-41930333_C_T   | 145R>C  | Substitution | Nonsynonymous coding | 34% |
| MM12T | CD34     | CD34 molecule                                                    | ENST00000367036 | chr1_208063101-208063101_A_   | NA      | Deletion     | Frameshift           | 28% |
| MM12T | CD37     | CD37 molecule                                                    | CCDS12760.1     | chr19_49838840-49838840_C_A   | 15L>I   | Substitution | Nonsynonymous coding | 31% |
| MM12T | CD38     | CD38 molecule                                                    | CCDS3417.1      | chr4_15818213-15818213_G_T    | 105D>Y  | Substitution | Nonsynonymous coding | 31% |
| MM12T | CD82     | CD82 molecule                                                    | CCDS7909.1      | chr11_44640638-44640638_G_A   | 256V>I  | Substitution | Nonsynonymous coding | 39% |
| MM12T | CD97     | CD97 molecule                                                    | CCDS32929.1     | chr19_14512503-14512503_G_A   | 372V>I  | Substitution | Nonsynonymous coding | 12% |
| MM12T | CDAN1    | codanin 1                                                        | CCDS32209.1     | chr15_43028229-43028229_C_T   | 206R>Q  | Substitution | Nonsynonymous coding | 33% |
| MM12T | CDC14A   | cell division cycle 14A                                          | CCDS770.1       | chr1_100889815-100889815_G_T  | 116R>I  | Substitution | Nonsynonymous coding | 29% |
| MM12T | CDC14B   | cell division cycle 14B                                          | ENST00000375236 | chr9_99278021-99278021_A_C    | 466I>S  | Substitution | Nonsynonymous coding | 37% |
| MM12T | CDC23    | cell division cycle 23                                           | CCDS4200.2      | chr5_137542340-137542340_C_T  | 90A>T   | Substitution | Nonsynonymous coding | 22% |
| MM12T | CDC34    | cell division cycle 34                                           | CCDS12030.1     | chr19_541398-541398_C_T       | 186T>M  | Substitution | Nonsynonymous coding | 47% |
| MM12T | CDC42BPB | CDC42 binding protein kinase beta (DMPK-like)                    | CCDS9978.1      | chr14_103406195-103406195_G_A | 1561P>S | Substitution | Nonsynonymous coding | 12% |
| MM12T | CDC42BPB | CDC42 binding protein kinase beta (DMPK-like)                    | CCDS9978.1      | chr14_103447355-103447355_G_A | 299R>X  | Substitution | Nonsense             | 27% |
| MM12T | CDC42BPG | CDC42 binding protein kinase gamma (DMPK-like)                   | CCDS31601.1     | chr11_64600744-64600744_G_A   | 897S>L  | Substitution | Nonsynonymous coding | 24% |
| MM12T | CDC42BPG | CDC42 binding protein kinase gamma (DMPK-like)                   | CCDS31601.1     | chr11_64606214-64606214_G_A   | 346A>V  | Substitution | Nonsynonymous coding | 24% |
| MM12T | CDC42EP1 | CDC42 effector protein (Rho GTPase binding) 1                    | CCDS13949.1     | chr22_37962639-37962639_C_    | NA      | Deletion     | Frameshift           | 25% |
| MM12T | CDC42EP1 | CDC42 effector protein (Rho GTPase binding) 1                    | CCDS13949.1     | chr22_37964544-37964544_C_T   | 298A>V  | Substitution | Nonsynonymous coding | 23% |
| MM12T | CDC7     | cell division cycle 7                                            | CCDS734.1       | chr1_91985737-91985737_C_T    | 411R>X  | Substitution | Nonsense             | 25% |

|       |          |                                                       |                 |                              |         |              |                      |     |
|-------|----------|-------------------------------------------------------|-----------------|------------------------------|---------|--------------|----------------------|-----|
| MM12T | CDCA2    | cell division cycle associated 2                      | CCDS6049.1      | chr8_25343318-25343318_C_A   | 470S>Y  | Substitution | Nonsynonymous coding | 32% |
| MM12T | CDCA2    | cell division cycle associated 2                      | CCDS6049.1      | chr8_25364551-25364551_G_A   | 790C>Y  | Substitution | Nonsynonymous coding | 33% |
| MM12T | CDCP1    | CUB domain containing protein 1                       | CCDS2727.1      | chr3_45136887-45136887_G_T   | 400L>I  | Substitution | Nonsynonymous coding | 31% |
| MM12T | CDCP2    | CUB domain containing protein 2                       | CCDS588.2       | chr1_54605319-54605319_GGG   | NA      | Insertion    | In-frame insertion   | 13% |
| MM12T | CDH12    | cadherin 12, type 2 (N-cadherin 2)                    | CCDS3890.1      | chr5_21755942-21755942_G_A   | 548A>V  | Substitution | Nonsynonymous coding | 42% |
| MM12T | CDH13    | cadherin 13, H-cadherin (heart)                       | NM_001257       | chr16_83520164-83520164_G_T  | 288Q>H  | Substitution | Nonsynonymous coding | 16% |
| MM12T | CDH15    | cadherin 15, type 1, M-cadherin (myotubule)           | CCDS10976.1     | chr16_89257781-89257781_G_A  | 426A>T  | Substitution | Nonsynonymous coding | 30% |
| MM12T | CDH16    | cadherin 16, KSP-cadherin                             | CCDS10823.1     | chr16_66946676-66946676_G_T  | 391F>L  | Substitution | Nonsynonymous coding | 32% |
| MM12T | CDH17    | cadherin 17, LI cadherin (liver-intestine)            | CCDS6260.1      | chr8_95143154-95143154_C_T   | 745R>H  | Substitution | Nonsynonymous coding | 21% |
| MM12T | CDH2     | cadherin 2, type 1, N-cadherin (neuronal)             | CCDS11891.1     | chr18_25593816-25593816_G_A  | 77A>V   | Substitution | Nonsynonymous coding | 21% |
| MM12T | CDH22    | cadherin 22, type 2                                   | CCDS13395.1     | chr20_44803572-44803572_G_A  | 687A>V  | Substitution | Nonsynonymous coding | 32% |
| MM12T | CDH23    | cadherin-related 23                                   | NM_022124       | chr10_73567275-73567275_G_T  | 2771G>C | Substitution | Nonsynonymous coding | 22% |
| MM12T | CDH23    | cadherin-related 23                                   | NM_022124       | chr10_73567389-73567389_C_T  | 2809R>C | Substitution | Nonsynonymous coding | 31% |
| MM12T | CDH26    | cadherin 26                                           | CCDS13485.1     | chr20_58587784-58587784_A_   | NA      | Deletion     | Frameshift           | 21% |
| MM12T | CDH26    | cadherin 26                                           | CCDS13485.1     | chr20_58569512-58569512_C_T  | 545A>V  | Substitution | Nonsynonymous coding | 24% |
| MM12T | CDH3     | cadherin 3, type 1, P-cadherin (placental)            | CCDS10868.1     | chr16_68713873-68713873_G_A  | 288R>Q  | Substitution | Nonsynonymous coding | 49% |
| MM12T | CDH3     | cadherin 3, type 1, P-cadherin (placental)            | CCDS10868.1     | chr16_68732130-68732130_C_T  | 773P>S  | Substitution | Nonsynonymous coding | 32% |
| MM12T | CDH5     | cadherin 5, type 2 (vascular endothelium)             | CCDS10804.1     | chr16_66413272-66413272_C_T  | 11S>L   | Substitution | Nonsynonymous coding | 13% |
| MM12T | CDH7     | cadherin 7, type 2                                    | CCDS11993.1     | chr18_63511085-63511085_G_A  | 340R>Q  | Substitution | Nonsynonymous coding | 21% |
| MM12T | CDH9     | cadherin 9, type 2 (T1-cadherin)                      | CCDS3893.1      | chr5_26915852-26915852_G_A   | 137R>W  | Substitution | Nonsynonymous coding | 12% |
| MM12T | CDHR3    | cadherin-related family member 3                      | CCDS47684.1     | chr7_105645064-105645064_G_A | 328R>H  | Substitution | Nonsynonymous coding | 11% |
| MM12T | CDIPT    | CDP-diacylglycerol-inositol 3-phosphatidyltransferase | ENST00000403894 | chr16_29872418-29872418_G_A  | 167A>V  | Substitution | Nonsynonymous coding | 11% |
| MM12T | CDK12    | cyclin-dependent kinase 12                            | CCDS11337.1     | chr17_37619337-37619337_G_A  | 338S>N  | Substitution | Nonsynonymous coding | 34% |
| MM12T | CDK12    | cyclin-dependent kinase 12                            | CCDS11337.1     | chr17_37687463-37687463_G_A  | 1456G>D | Substitution | Nonsynonymous coding | 27% |
| MM12T | CDK18    | cyclin-dependent kinase 18                            | CCDS1454.1      | chr1_205492351-205492351_G_A | 19R>H   | Substitution | Nonsynonymous coding | 29% |
| MM12T | CDK2     | cyclin-dependent kinase 2                             | CCDS8898.1      | chr12_56365333-56365333_G_A  | 274R>Q  | Substitution | Nonsynonymous coding | 28% |
| MM12T | CDK20    | cyclin-dependent kinase 20                            | CCDS35060.1     | chr9_90586201-90586201_G_A   | 80A>V   | Substitution | Nonsynonymous coding | 32% |
| MM12T | CDK5RAP1 | CDK5 regulatory subunit associated protein 1          | CCDS13219.1     | chr20_31958339-31958339_T_G  | 453N>T  | Substitution | Nonsynonymous coding | 12% |
| MM12T | CDK5RAP1 | CDK5 regulatory subunit associated protein 1          | CCDS13219.1     | chr20_31984670-31984670_A_T  | 67H>Q   | Substitution | Nonsynonymous coding | 11% |
| MM12T | CDK8     | cyclin-dependent kinase 8                             | CCDS9317.1      | chr13_26967528-26967528_T_C  | 224F>S  | Substitution | Nonsynonymous coding | 11% |
| MM12T | CDK9     | cyclin-dependent kinase 9                             | CCDS6879.1      | chr9_130549830-130549830_C_A | 70L>I   | Substitution | Nonsynonymous coding | 38% |
| MM12T | CDKL3    | cyclin-dependent kinase-like 3                        | CCDS47264.1     | chr5_133685943-133685943_C_T | 179G>E  | Substitution | Nonsynonymous coding | 12% |

|       |         |                                                                               |             |                               |         |              |                      |     |
|-------|---------|-------------------------------------------------------------------------------|-------------|-------------------------------|---------|--------------|----------------------|-----|
| MM12T | CDKL5   | cyclin-dependent kinase-like 5                                                | CCDS14186.1 | chrX_18622500-18622500_G_A    | 486A>T  | Substitution | Nonsynonymous coding | 38% |
| MM12T | CDKL5   | cyclin-dependent kinase-like 5                                                | CCDS14186.1 | chrX_18622570-18622570_C_T    | 509A>V  | Substitution | Nonsynonymous coding | 12% |
| MM12T | CDKL5   | cyclin-dependent kinase-like 5                                                | CCDS14186.1 | chrX_18582644-18582644_T_C    | ISV+2>  | Substitution | Splice site donor    | 26% |
| MM12T | CDO1    | cysteine dioxygenase, type I                                                  | CCDS4121.1  | chr5_115142159-115142159_G_T  | 154L>I  | Substitution | Nonsynonymous coding | 34% |
| MM12T | CDS1    | CDP-diacylglycerol synthase (phosphatidate cytidyltransferase) 1              | CCDS3608.1  | chr4_85564231-85564231_G_A    | 363A>T  | Substitution | Nonsynonymous coding | 37% |
| MM12T | CEBPZ   | CCAAT/enhancer binding protein (C/EBP), zeta                                  | CCDS1787.1  | chr2_37455465-37455465_C_T    | 291E>K  | Substitution | Nonsynonymous coding | 28% |
| MM12T | CECR6   | cat eye syndrome chromosome region, candidate 6                               | CCDS13740.1 | chr22_17600744-17600744_C_T   | 425R>H  | Substitution | Nonsynonymous coding | 33% |
| MM12T | CECR6   | cat eye syndrome chromosome region, candidate 6                               | CCDS13740.1 | chr22_17600843-17600843_G_A   | 392A>V  | Substitution | Nonsynonymous coding | 41% |
| MM12T | CEL     | carboxyl ester lipase (bile salt-stimulated lipase)                           | CCDS43896.1 | chr9_135940612-135940612_G_A  | 179A>T  | Substitution | Nonsynonymous coding | 12% |
| MM12T | CELF3   | CUGBP, Elav-like family member 3                                              | CCDS1002.1  | chr1_151680363-151680363_G_A  | 179R>X  | Substitution | Nonsense             | 32% |
| MM12T | CELSR1  | cadherin, EGF LAG seven-pass G-type receptor 1 (flamingo homolog, Drosophila) | CCDS14076.1 | chr22_46859880-46859880_C_T   | 1303D>N | Substitution | Nonsynonymous coding | 13% |
| MM12T | CELSR1  | cadherin, EGF LAG seven-pass G-type receptor 1 (flamingo homolog, Drosophila) | CCDS14076.1 | chr22_46931873-46931873_C_T   | 399V>I  | Substitution | Nonsynonymous coding | 15% |
| MM12T | CELSR2  | cadherin, EGF LAG seven-pass G-type receptor 2 (flamingo homolog, Drosophila) | CCDS796.1   | chr1_109794842-109794842_G_A  | 714S>N  | Substitution | Nonsynonymous coding | 31% |
| MM12T | CELSR2  | cadherin, EGF LAG seven-pass G-type receptor 2 (flamingo homolog, Drosophila) | CCDS796.1   | chr1_109801524-109801524_G_A  | 1261V>M | Substitution | Nonsynonymous coding | 36% |
| MM12T | CELSR3  | cadherin, EGF LAG seven-pass G-type receptor 3 (flamingo homolog, Drosophila) | CCDS2775.1  | chr3_48681013-48681013_G_T    | 2755L>I | Substitution | Nonsynonymous coding | 37% |
| MM12T | CELSR3  | cadherin, EGF LAG seven-pass G-type receptor 3 (flamingo homolog, Drosophila) | CCDS2775.1  | chr3_48687984-48687984_C_T    | 2134R>K | Substitution | Nonsynonymous coding | 16% |
| MM12T | CELSR3  | cadherin, EGF LAG seven-pass G-type receptor 3 (flamingo homolog, Drosophila) | CCDS2775.1  | chr3_48697594-48697594_C_T    | 825R>H  | Substitution | Nonsynonymous coding | 11% |
| MM12T | CELSR3  | cadherin, EGF LAG seven-pass G-type receptor 3 (flamingo homolog, Drosophila) | CCDS2775.1  | chr3_48698662-48698662_C_T    | 469R>H  | Substitution | Nonsynonymous coding | 11% |
| MM12T | CELSR3  | cadherin, EGF LAG seven-pass G-type receptor 3 (flamingo homolog, Drosophila) | CCDS2775.1  | chr3_48698740-48698740_C_T    | 443R>H  | Substitution | Nonsynonymous coding | 30% |
| MM12T | CELSR3  | cadherin, EGF LAG seven-pass G-type receptor 3 (flamingo homolog, Drosophila) | CCDS2775.1  | chr3_48698791-48698791_C_T    | 426R>H  | Substitution | Nonsynonymous coding | 32% |
| MM12T | CENPB   | centromere protein B, 80kDa                                                   | CCDS13064.1 | chr20_3766572-3766572_C_T     | 187A>T  | Substitution | Nonsynonymous coding | 29% |
| MM12T | CENPE   | centromere protein E, 312kDa                                                  | CCDS34042.1 | chr4_104030070-104030070_G_A  | 2634P>L | Substitution | Nonsynonymous coding | 26% |
| MM12T | CENPE   | centromere protein E, 312kDa                                                  | CCDS34042.1 | chr4_104117997-104117997_G_T  | 23L>I   | Substitution | Nonsynonymous coding | 32% |
| MM12T | CENPF   | centromere protein F, 350/400kDa                                              | CCDS31023.1 | chr1_214813419-214813419_C_T  | 580H>Y  | Substitution | Nonsynonymous coding | 44% |
| MM12T | CENPF   | centromere protein F, 350/400kDa                                              | CCDS31023.1 | chr1_214819533-214819533_C_T  | 2207T>M | Substitution | Nonsynonymous coding | 38% |
| MM12T | CENPI   | centromere protein I                                                          | CCDS14479.1 | chrX_100382190-100382190_C_T  | 281R>W  | Substitution | Nonsynonymous coding | 30% |
| MM12T | CENPJ   | centromere protein J                                                          | CCDS9310.1  | chr13_25466782-25466782_G_A   | 1072A>V | Substitution | Nonsynonymous coding | 13% |
| MM12T | CEP128  | centrosomal protein 128kDa                                                    | CCDS32130.1 | chr14_81304618-81304618_T_G   | 285E>A  | Substitution | Nonsynonymous coding | 18% |
| MM12T | CEP128  | centrosomal protein 128kDa                                                    | CCDS32130.1 | chr14_81329104-81329104_C_A   | 253Q>H  | Substitution | Nonsynonymous coding | 38% |
| MM12T | CEP164  | centrosomal protein 164kDa                                                    | CCDS31683.1 | chr11_117222543-117222543_G_A | 78A>T   | Substitution | Nonsynonymous coding | 24% |
| MM12T | CEP164  | centrosomal protein 164kDa                                                    | CCDS31683.1 | chr11_117263749-117263749_G_T | 841Q>H  | Substitution | Nonsynonymous coding | 12% |
| MM12T | CEP170B | centrosomal protein 170B                                                      | CCDS45175.1 | chr14_105353812-105353812_G_A | 1079R>H | Substitution | Nonsynonymous coding | 32% |

|       |         |                                                   |             |                               |         |              |                      |     |
|-------|---------|---------------------------------------------------|-------------|-------------------------------|---------|--------------|----------------------|-----|
| MM12T | CEP170B | centrosomal protein 170B                          | CCDS45175.1 | chr14_105353976-105353976_G_A | 1134A>T | Substitution | Nonsynonymous coding | 35% |
| MM12T | CEP192  | centrosomal protein 192kDa                        | CCDS32792.1 | chr18_13068895-13068895_G_A   | 1027E>K | Substitution | Nonsynonymous coding | 15% |
| MM12T | CEP192  | centrosomal protein 192kDa                        | CCDS32792.1 | chr18_13095603-13095603_C_T   | 1523P>L | Substitution | Nonsynonymous coding | 28% |
| MM12T | CEP250  | centrosomal protein 250kDa                        | CCDS13255.1 | chr20_34060643-34060643_G_A   | 399R>H  | Substitution | Nonsynonymous coding | 24% |
| MM12T | CEP250  | centrosomal protein 250kDa                        | CCDS13255.1 | chr20_34090717-34090717_G_T   | 1507R>M | Substitution | Nonsynonymous coding | 32% |
| MM12T | CEP250  | centrosomal protein 250kDa                        | CCDS13255.1 | chr20_34090455-34090455_C_T   | 1420Q>X | Substitution | Nonsense             | 15% |
| MM12T | CEP290  | centrosomal protein 290kDa                        | NM_025114   | chr12_88465149-88465149_C_T   | 1978R>Q | Substitution | Nonsynonymous coding | 26% |
| MM12T | CEP350  | centrosomal protein 350kDa                        | CCDS1336.1  | chr1_179965891-179965891_G_A  | 200R>Q  | Substitution | Nonsynonymous coding | 20% |
| MM12T | CEP350  | centrosomal protein 350kDa                        | CCDS1336.1  | chr1_179989356-179989356_G_A  | 816S>N  | Substitution | Nonsynonymous coding | 21% |
| MM12T | CEP44   | centrosomal protein 44kDa                         | CCDS47163.1 | chr4_175225516-175225516_G_A  | 168G>E  | Substitution | Nonsynonymous coding | 15% |
| MM12T | CEP57L1 | centrosomal protein 57kDa-like 1                  | CCDS5071.1  | chr6_109475148-109475148_C_T  | 192A>V  | Substitution | Nonsynonymous coding | 15% |
| MM12T | CEP72   | centrosomal protein 72kDa                         | CCDS34126.1 | chr5_624695-624695_G_A        | ISV+1>  | Substitution | Splice site donor    | 12% |
| MM12T | CEP78   | centrosomal protein 78kDa                         | CCDS47984.1 | chr9_80854969-80854969_G_A    | 95R>H   | Substitution | Nonsynonymous coding | 18% |
| MM12T | CEP97   | centrosomal protein 97kDa                         | CCDS2944.1  | chr3_101481355-101481355_G_A  | 615R>H  | Substitution | Nonsynonymous coding | 17% |
| MM12T | CEPT1   | choline/ethanolamine phosphotransferase 1         | CCDS830.1   | chr1_111690484-111690484_C_T  | 50R>W   | Substitution | Nonsynonymous coding | 27% |
| MM12T | CERS6   | ceramide synthase 6                               | CCDS2228.1  | chr2_169626102-169626102_C_T  | 362A>V  | Substitution | Nonsynonymous coding | 15% |
| MM12T | CES3    | carboxylesterase 3                                | CCDS10826.1 | chr16_67006810-67006810_A_G   | 525Q>R  | Substitution | Nonsynonymous coding | 13% |
| MM12T | CESSA   | carboxylesterase 5A                               | CCDS45490.1 | chr16_55886822-55886822_G_T   | 415P>H  | Substitution | Nonsynonymous coding | 25% |
| MM12T | CFB     | complement factor B [Source:HGNC Symbol;Acc:1037] | CCDS4729.1  | chr6_31916712-31916712_G_A    | 381R>H  | Substitution | Nonsynonymous coding | 23% |
| MM12T | CFH     | complement factor H                               | CCDS1385.1  | chr1_196695660-196695660_C_T  | 645T>M  | Substitution | Nonsynonymous coding | 17% |
| MM12T | CGNL1   | cingulin-like 1                                   | CCDS10161.1 | chr15_57731032-57731032_C_T   | 279R>W  | Substitution | Nonsynonymous coding | 26% |
| MM12T | CGNL1   | cingulin-like 1                                   | CCDS10161.1 | chr15_57745911-57745911_G_T   | 695Q>H  | Substitution | Nonsynonymous coding | 28% |
| MM12T | CGNL1   | cingulin-like 1                                   | CCDS10161.1 | chr15_57816877-57816877_G_A   | 989M>I  | Substitution | Nonsynonymous coding | 16% |
| MM12T | CHAF1A  | chromatin assembly factor 1, subunit A (p150)     | CCDS32875.1 | chr19_4422768-4422768_G_A     | 408R>H  | Substitution | Nonsynonymous coding | 12% |
| MM12T | CHAMP1  | chromosome alignment maintaining phosphoprotein 1 | CCDS9545.1  | chr13_115090092-115090092_C_T | 259P>S  | Substitution | Nonsynonymous coding | 33% |
| MM12T | CHD1    | chromodomain helicase DNA binding protein 1       | CCDS34204.1 | chr5_98221325-98221325_A_C    | 842L>R  | Substitution | Nonsynonymous coding | 16% |
| MM12T | CHD2    | chromodomain helicase DNA binding protein 2       | CCDS10374.2 | chr15_93496673-93496673_A_G   | 530H>R  | Substitution | Nonsynonymous coding | 29% |
| MM12T | CHD3    | chromodomain helicase DNA binding protein 3       | CCDS32553.2 | chr17_7797799-7797799_A_G     | 440Y>C  | Substitution | Nonsynonymous coding | 13% |
| MM12T | CHD3    | chromodomain helicase DNA binding protein 3       | CCDS32553.2 | chr17_7810786-7810786_G_A     | 1694R>H | Substitution | Nonsynonymous coding | 28% |
| MM12T | CHD4    | chromodomain helicase DNA binding protein 4       | CCDS8552.1  | chr12_6707111-6707111_C_T     | 614R>H  | Substitution | Nonsynonymous coding | 13% |
| MM12T | CHD4    | chromodomain helicase DNA binding protein 4       | CCDS8552.1  | chr12_6707509-6707509_G_T     | 522P>H  | Substitution | Nonsynonymous coding | 28% |
| MM12T | CHD4    | chromodomain helicase DNA binding protein 4       | CCDS8552.1  | chr12_6709792-6709792_G_A     | 324A>V  | Substitution | Nonsynonymous coding | 13% |

|       |        |                                                     |             |                              |         |              |                      |     |
|-------|--------|-----------------------------------------------------|-------------|------------------------------|---------|--------------|----------------------|-----|
| MM12T | CHD4   | chromodomain helicase DNA binding protein 4         | CCDS8552.1  | chr12_6680190-6680190_G_A    | 1856Q>X | Substitution | Nonsense             | 36% |
| MM12T | CHD6   | chromodomain helicase DNA binding protein 6         | CCDS13317.1 | chr20_40034047-40034047_C_T  | 2445R>Q | Substitution | Nonsynonymous coding | 36% |
| MM12T | CHD6   | chromodomain helicase DNA binding protein 6         | CCDS13317.1 | chr20_40081497-40081497_G_A  | 1069S>L | Substitution | Nonsynonymous coding | 33% |
| MM12T | CHD7   | chromodomain helicase DNA binding protein 7         | CCDS47865.1 | chr8_61655180-61655180_T_C   | 397S>P  | Substitution | Nonsynonymous coding | 32% |
| MM12T | CHD7   | chromodomain helicase DNA binding protein 7         | CCDS47865.1 | chr8_61765633-61765633_C_A   | 2117L>I | Substitution | Nonsynonymous coding | 12% |
| MM12T | CHD7   | chromodomain helicase DNA binding protein 7         | CCDS47865.1 | chr8_61778271-61778271_G_A   | 2925A>T | Substitution | Nonsynonymous coding | 37% |
| MM12T | CHD9   | chromodomain helicase DNA binding protein 9         | CCDS45485.1 | chr16_53276755-53276755_C_T  | 961R>C  | Substitution | Nonsynonymous coding | 33% |
| MM12T | CHD9   | chromodomain helicase DNA binding protein 9         | CCDS45485.1 | chr16_53326813-53326813_C_T  | 1787R>C | Substitution | Nonsynonymous coding | 35% |
| MM12T | CHD9   | chromodomain helicase DNA binding protein 9         | CCDS45485.1 | chr16_53337698-53337698_G_A  | 1927R>H | Substitution | Nonsynonymous coding | 31% |
| MM12T | CHD9   | chromodomain helicase DNA binding protein 9         | CCDS45485.1 | chr16_53337880-53337880_C_T  | 1988R>C | Substitution | Nonsynonymous coding | 31% |
| MM12T | CHDH   | choline dehydrogenase                               | CCDS2873.1  | chr3_53856621-53856621_C_T   | 251R>H  | Substitution | Nonsynonymous coding | 30% |
| MM12T | CHGA   | chromogranin A (parathyroid secretory protein 1)    | CCDS9906.1  | chr14_93392955-93392955_G_A  | 33M>I   | Substitution | Nonsynonymous coding | 18% |
| MM12T | CHI3L1 | chitinase 3-like 1 (cartilage glycoprotein-39)      | CCDS1435.1  | chr1_203150364-203150364_G_A | 213R>C  | Substitution | Nonsynonymous coding | 16% |
| MM12T | CHI3L2 | chitinase 3-like 2                                  | CCDS30802.1 | chr1_111778330-111778330_G_A | 184V>I  | Substitution | Nonsynonymous coding | 20% |
| MM12T | CHID1  | chitinase domain containing 1                       | CCDS44511.1 | chr11_883199-883199_C_T      | 328G>D  | Substitution | Nonsynonymous coding | 30% |
| MM12T | CHKA   | choline kinase alpha                                | CCDS8178.1  | chr11_67842221-67842221_C_T  | 198G>D  | Substitution | Nonsynonymous coding | 11% |
| MM12T | CHMP2A | charged multivesicular body protein 2A              | CCDS12986.1 | chr19_59065534-59065534_G_A  | 16R>W   | Substitution | Nonsynonymous coding | 16% |
| MM12T | CHODL  | chondrolectin                                       | CCDS13570.1 | chr21_19635132-19635132_T_C  | 220V>A  | Substitution | Nonsynonymous coding | 56% |
| MM12T | CHP2   | calcineurin-like EF-hand protein 2                  | CCDS10617.1 | chr16_23767029-23767029_G_A  | 39D>N   | Substitution | Nonsynonymous coding | 14% |
| MM12T | CHPF2  | chondroitin polymerizing factor 2                   | CCDS34779.1 | chr7_150934469-150934469_C_T | 341R>W  | Substitution | Nonsynonymous coding | 40% |
| MM12T | CHRD   | chordin                                             | CCDS3266.1  | chr3_184099345-184099345_G_T | 148E>D  | Substitution | Nonsynonymous coding | 15% |
| MM12T | CHRD   | chordin                                             | CCDS3266.1  | chr3_184102469-184102469_G_A | 529A>T  | Substitution | Nonsynonymous coding | 13% |
| MM12T | CHRM1  | cholinergic receptor, muscarinic 1                  | CCDS8040.1  | chr11_62678100-62678100_G_A  | 158A>V  | Substitution | Nonsynonymous coding | 12% |
| MM12T | CHRNA1 | cholinergic receptor, nicotinic, alpha 1 (muscle)   | CCDS33331.1 | chr2_175612880-175612880_C_T | 474R>Q  | Substitution | Nonsynonymous coding | 12% |
| MM12T | CHRNA2 | cholinergic receptor, nicotinic, alpha 2 (neuronal) | CCDS6059.1  | chr8_27320798-27320798_C_T   | 388E>K  | Substitution | Nonsynonymous coding | 41% |
| MM12T | CHRN2  | cholinergic receptor, nicotinic, beta 2 (neuronal)  | CCDS1070.1  | chr1_154541989-154541989_C_A | 39P>H   | Substitution | Nonsynonymous coding | 31% |
| MM12T | CHRN3  | cholinergic receptor, nicotinic, beta 3 (neuronal)  | CCDS6134.1  | chr8_42587393-42587393_G_A   | 315V>M  | Substitution | Nonsynonymous coding | 18% |
| MM12T | CHRND  | cholinergic receptor, nicotinic, delta (muscle)     | CCDS2494.1  | chr2_233390969-233390969_C_T | 15A>V   | Substitution | Nonsynonymous coding | 30% |
| MM12T | CHRND  | cholinergic receptor, nicotinic, delta (muscle)     | CCDS2494.1  | chr2_233396161-233396161_C_T | 307P>L  | Substitution | Nonsynonymous coding | 34% |
| MM12T | CHRNE  | cholinergic receptor, nicotinic, epsilon (muscle)   | CCDS11058.1 | chr17_4802840-4802840_C_T    | 319V>I  | Substitution | Nonsynonymous coding | 16% |
| MM12T | CHRNE  | cholinergic receptor, nicotinic, epsilon (muscle)   | CCDS11058.1 | chr17_4804426-4804426_C_T    | 221A>T  | Substitution | Nonsynonymous coding | 26% |
| MM12T | CHRNE  | cholinergic receptor, nicotinic, epsilon (muscle)   | CCDS11058.1 | chr17_4804465-4804465_C_T    | 208D>N  | Substitution | Nonsynonymous coding | 18% |

|       |        |                                                                           |             |                               |         |              |                      |     |
|-------|--------|---------------------------------------------------------------------------|-------------|-------------------------------|---------|--------------|----------------------|-----|
| MM12T | CHRNE  | cholinergic receptor, nicotinic, epsilon (muscle)                         | CCDS11058.1 | chr17_4805293-4805293_C_T     | 145R>H  | Substitution | Nonsynonymous coding | 12% |
| MM12T | CHST10 | carbohydrate sulfotransferase 10                                          | CCDS2047.1  | chr2_101009786-101009786_T_C  | 331D>G  | Substitution | Nonsynonymous coding | 40% |
| MM12T | CHST10 | carbohydrate sulfotransferase 10                                          | CCDS2047.1  | chr2_101012038-101012038_C_T  | 156V>M  | Substitution | Nonsynonymous coding | 41% |
| MM12T | CHST2  | carbohydrate (N-acetylglucosamine-6-O) sulfotransferase 2                 | CCDS3129.1  | chr3_142840706-142840706_C_T  | 350R>C  | Substitution | Nonsynonymous coding | 29% |
| MM12T | CHST6  | carbohydrate (N-acetylglucosamine 6-O) sulfotransferase 6                 | CCDS10918.1 | chr16_75513690-75513690_C_T   | 13A>T   | Substitution | Nonsynonymous coding | 13% |
| MM12T | CHST7  | carbohydrate (N-acetylglucosamine 6-O) sulfotransferase 7                 | CCDS14268.1 | chrX_46434226-46434226_G_A    | 287R>H  | Substitution | Nonsynonymous coding | 33% |
| MM12T | CHSY1  | chondroitin sulfate synthase 1                                            | NM_014918   | chr15_101718260-101718260_G_T | 581A>D  | Substitution | Nonsynonymous coding | 13% |
| MM12T | CHTF18 | CTF18, chromosome transmission fidelity factor 18 homolog (S. cerevisiae) | CCDS45371.1 | chr16_843011-843011_G_A       | 540A>T  | Substitution | Nonsynonymous coding | 34% |
| MM12T | CIDEC  | cell death-inducing DFFA-like effector c                                  | CCDS2587.1  | chr3_9918821-9918821_G_A      | 46R>C   | Substitution | Nonsynonymous coding | 38% |
| MM12T | CILP2  | cartilage intermediate layer protein 2                                    | CCDS12405.1 | chr19_19655248-19655248_G_A   | 632G>S  | Substitution | Nonsynonymous coding | 25% |
| MM12T | CKAP2  | cytoskeleton associated protein 2                                         | CCDS41893.1 | chr13_53048165-53048165_C_T   | 584T>M  | Substitution | Nonsynonymous coding | 34% |
| MM12T | CKAP5  | cytoskeleton associated protein 5                                         | CCDS31477.1 | chr11_46780906-46780906_T_C   | 1494D>G | Substitution | Nonsynonymous coding | 22% |
| MM12T | CKMT1B | creatine kinase, mitochondrial 1B                                         | CCDS10097.1 | chr15_43891412-43891412_C_T   | 399R>C  | Substitution | Nonsynonymous coding | 15% |
| MM12T | CKMT2  | creatine kinase, mitochondrial 2 (sarcomeric)                             | CCDS4053.1  | chr5_80559317-80559317_G_A    | 341R>H  | Substitution | Nonsynonymous coding | 34% |
| MM12T | CKMT2  | creatine kinase, mitochondrial 2 (sarcomeric)                             | CCDS4053.1  | chr5_80554980-80554980_G_A    | 307W>X  | Substitution | Nonsense             | 11% |
| MM12T | CLASP1 | cytoplasmic linker associated protein 1                                   | NM_015282   | chr2_122154739-122154739_G_A  | 1034P>S | Substitution | Nonsynonymous coding | 31% |
| MM12T | CLCN1  | chloride channel, voltage-sensitive 1                                     | CCDS5881.1  | chr7_143036399-143036399_G_A  | 485M>I  | Substitution | Nonsynonymous coding | 12% |
| MM12T | CLCN7  | chloride channel, voltage-sensitive 7                                     | CCDS32361.1 | chr16_1505730-1505730_A_G     | ISV+2>  | Substitution | Splice site donor    | 30% |
| MM12T | CLDN1  | claudin 1                                                                 | CCDS3295.1  | chr3_190030678-190030678_G_A  | 124A>V  | Substitution | Nonsynonymous coding | 21% |
| MM12T | CLDN1  | claudin 1                                                                 | CCDS3295.1  | chr3_190030789-190030789_C_T  | 87G>D   | Substitution | Nonsynonymous coding | 10% |
| MM12T | CLDN11 | claudin 11                                                                | CCDS3213.1  | chr3_170150320-170150320_G_A  | 134A>T  | Substitution | Nonsynonymous coding | 31% |
| MM12T | CLDN12 | claudin 12                                                                | CCDS5618.1  | chr7_90042213-90042213_T_C    | 75Y>H   | Substitution | Nonsynonymous coding | 16% |
| MM12T | CLDN15 | claudin 15                                                                | CCDS5717.1  | chr7_100880816-100880816_C_T  | 16G>E   | Substitution | Nonsynonymous coding | 30% |
| MM12T | CLDN22 | claudin 22                                                                | CCDS43286.1 | chr4_184240941-184240941_G_A  | 144T>M  | Substitution | Nonsynonymous coding | 22% |
| MM12T | CLDN9  | claudin 9                                                                 | CCDS10487.1 | chr16_3063605-3063605_G_A     | 81R>H   | Substitution | Nonsynonymous coding | 39% |
| MM12T | CLEC2L | C-type lectin domain family 2, member L                                   | CCDS47724.1 | chr7_139225199-139225199_C_T  | 133A>V  | Substitution | Nonsynonymous coding | 10% |
| MM12T | CLEC3A | C-type lectin domain family 3, member A                                   | CCDS10927.1 | chr16_78064556-78064556_G_A   | 138E>K  | Substitution | Nonsynonymous coding | 30% |
| MM12T | CLEC4G | C-type lectin domain family 4, member G                                   | CCDS12185.1 | chr19_7794325-7794325_G_A     | 270T>M  | Substitution | Nonsynonymous coding | 32% |
| MM12T | CLEC9A | C-type lectin domain family 9, member A                                   | CCDS8611.1  | chr12_10217364-10217364_G_T   | 169G>X  | Substitution | Nonsense             | 11% |
| MM12T | CLIC6  | chloride intracellular channel 6                                          | CCDS13638.1 | chr21_36042291-36042291_G_A   | 202A>T  | Substitution | Nonsynonymous coding | 13% |
| MM12T | CLIC6  | chloride intracellular channel 6                                          | CCDS13638.1 | chr21_36042366-36042366_G_T   | 227G>W  | Substitution | Nonsynonymous coding | 45% |
| MM12T | CLIP2  | CAP-GLY domain containing linker protein 2                                | CCDS5569.1  | chr7_73814758-73814758_C_T    | 980A>V  | Substitution | Nonsynonymous coding | 29% |

|       |        |                                                                                   |             |                               |         |              |                      |     |
|-------|--------|-----------------------------------------------------------------------------------|-------------|-------------------------------|---------|--------------|----------------------|-----|
| MM12T | CLIP3  | CAP-GLY domain containing linker protein 3                                        | CCDS12486.1 | chr19_36508803-36508803_G_A   | 425A>V  | Substitution | Nonsynonymous coding | 30% |
| MM12T | CLIP3  | CAP-GLY domain containing linker protein 3                                        | CCDS12486.1 | chr19_36517518-36517518_G_A   | 178R>C  | Substitution | Nonsynonymous coding | 30% |
| MM12T | CLIP4  | CAP-GLY domain containing linker protein family, member 4                         | CCDS1770.1  | chr2_29366574-29366574_G_A    | ISV-1>  | Substitution | Splice site acceptor | 20% |
| MM12T | CLK2   | CDC-like kinase 2                                                                 | CCDS1107.1  | chr1_155237856-155237856_G_A  | 205R>X  | Substitution | Nonsense             | 28% |
| MM12T | CLK3   | CDC-like kinase 3                                                                 | CCDS45304.1 | chr15_74911641-74911641_G_A   | 183R>Q  | Substitution | Nonsynonymous coding | 11% |
| MM12T | CLK4   | CDC-like kinase 4                                                                 | CCDS4437.1  | chr5_178039855-178039855_T_C  | 288K>R  | Substitution | Nonsynonymous coding | 33% |
| MM12T | CLMN   | calmin (calponin-like, transmembrane)                                             | CCDS9933.1  | chr14_95679587-95679587_G_T   | 193L>M  | Substitution | Nonsynonymous coding | 32% |
| MM12T | CLN6   | ceroid-lipofuscinosis, neuronal 6, late infantile, variant                        | CCDS10227.1 | chr15_68504170-68504170_C_T   | 110R>H  | Substitution | Nonsynonymous coding | 13% |
| MM12T | CLP1   | cleavage and polyadenylation factor I subunit 1                                   | CCDS7964.1  | chr11_57427444-57427444_C_A   | 166L>I  | Substitution | Nonsynonymous coding | 31% |
| MM12T | CLPP   | ClpP caseinolytic peptidase, ATP-dependent, proteolytic subunit homolog (E. coli) | CCDS12162.1 | chr19_6362482-6362482_T_C     | 99V>A   | Substitution | Nonsynonymous coding | 27% |
| MM12T | CLPTM1 | cleft lip and palate associated transmembrane protein 1                           | CCDS12651.1 | chr19_45477753-45477753_G_A   | 123A>T  | Substitution | Nonsynonymous coding | 12% |
| MM12T | CLTC   | clathrin, heavy chain (Hc)                                                        | CCDS32696.1 | chr17_57743594-57743594_C_T   | 592A>V  | Substitution | Nonsynonymous coding | 25% |
| MM12T | CLTC   | clathrin, heavy chain (Hc)                                                        | CCDS32696.1 | chr17_57758765-57758765_G_A   | 1059A>T | Substitution | Nonsynonymous coding | 34% |
| MM12T | CLTCL1 | clathrin, heavy chain-like 1                                                      | CCDS46662.1 | chr22_19226794-19226794_G_A   | ISV+4>  | Substitution | Splice site donor    | 19% |
| MM12T | CLVS1  | clavesin 1                                                                        | CCDS6176.1  | chr8_62289226-62289226_C_T    | 173P>L  | Substitution | Nonsynonymous coding | 26% |
| MM12T | CMYA5  | cardiomyopathy associated 5                                                       | CCDS47238.1 | chr5_79029567-79029567_C_T    | 1660P>L | Substitution | Nonsynonymous coding | 28% |
| MM12T | CNDP2  | CNDP dipeptidase 2 (metallopeptidase M20 family)                                  | CCDS12006.1 | chr18_72167213-72167213_C_T   | 2A>V    | Substitution | Nonsynonymous coding | 30% |
| MM12T | CNGA2  | cyclic nucleotide gated channel alpha 2                                           | CCDS14701.1 | chrX_150911771-150911771_C_T  | 266R>C  | Substitution | Nonsynonymous coding | 29% |
| MM12T | CNGB1  | cyclic nucleotide gated channel beta 1                                            | CCDS42169.1 | chr16_57957192-57957192_G_A   | 543T>I  | Substitution | Nonsynonymous coding | 34% |
| MM12T | CNNM2  | cyclin M2                                                                         | CCDS44474.1 | chr10_104679100-104679100_G_A | 288R>H  | Substitution | Nonsynonymous coding | 12% |
| MM12T | CNNM3  | cyclin M3                                                                         | CCDS2025.1  | chr2_97492600-97492600_C_T    | 467S>F  | Substitution | Nonsynonymous coding | 29% |
| MM12T | CNOT11 | CCR4-NOT transcription complex, subunit 11                                        | CCDS2050.1  | chr2_101883235-101883235_G_A  | 378A>T  | Substitution | Nonsynonymous coding | 34% |
| MM12T | CNOT4  | CCR4-NOT transcription complex, subunit 4                                         | CCDS43650.1 | chr7_135078937-135078937_G_T  | 451L>M  | Substitution | Nonsynonymous coding | 12% |
| MM12T | CNOT6L | CCR4-NOT transcription complex, subunit 6-like                                    | CCDS47082.1 | chr4_78647371-78647371_C_T    | 469A>T  | Substitution | Nonsynonymous coding | 35% |
| MM12T | CNPY1  | canopy 1 homolog (zebrafish)                                                      | CCDS43684.1 | chr7_155301605-155301605_C_A  | 43R>I   | Substitution | Nonsynonymous coding | 24% |
| MM12T | CNPY2  | canopy 2 homolog (zebrafish)                                                      | CCDS8914.1  | chr12_56704996-56704996_G_A   | 136A>V  | Substitution | Nonsynonymous coding | 13% |
| MM12T | CNTRF  | ciliary neurotrophic factor receptor                                              | CCDS6558.1  | chr9_34552831-34552831_C_T    | 264A>T  | Substitution | Nonsynonymous coding | 27% |
| MM12T | CNTLN  | centlein, centrosomal protein                                                     | CCDS43789.1 | chr9_17135271-17135271_G_     | NA      | Deletion     | Frameshift           | 34% |
| MM12T | CNTN1  | contactin 1                                                                       | CCDS8737.1  | chr12_41337923-41337923_A_T   | 545Y>F  | Substitution | Nonsynonymous coding | 38% |
| MM12T | CNTN2  | contactin 2 (axonal)                                                              | CCDS1449.1  | chr1_205042817-205042817_G_A  | 1016R>H | Substitution | Nonsynonymous coding | 31% |
| MM12T | CNTN2  | contactin 2 (axonal)                                                              | CCDS1449.1  | chr1_205027722-205027722_C_T  | 140R>X  | Substitution | Nonsense             | 12% |
| MM12T | CNTN3  | contactin 3 (plasmacytoma associated)                                             | CCDS33790.1 | chr3_74334506-74334506_G_A    | 885A>V  | Substitution | Nonsynonymous coding | 10% |

|       |             |                                                            |                 |                               |         |              |                      |     |
|-------|-------------|------------------------------------------------------------|-----------------|-------------------------------|---------|--------------|----------------------|-----|
| MM12T | CNTN6       | contactin 6                                                | CCDS2557.1      | chr3_1427365-1427365_C_T      | 863T>I  | Substitution | Nonsynonymous coding | 10% |
| MM12T | CNTNAP2     | contactin associated protein-like 2                        | CCDS5889.1      | chr7_148112674-148112674_C_T  | 1321T>I | Substitution | Nonsynonymous coding | 13% |
| MM12T | CNTNAP4     | contactin associated protein-like 4                        | NM_138994       | chr16_76592533-76592533_A_G   | 1221N>D | Substitution | Nonsynonymous coding | 26% |
| MM12T | CNTNAP5     | contactin associated protein-like 5                        | CCDS46401.1     | chr2_125281937-125281937_G_A  | 461R>H  | Substitution | Nonsynonymous coding | 16% |
| MM12T | CNTRL       | centriolin                                                 | CCDS35118.1     | chr9_123931925-123931925_A_T  | 2036E>V | Substitution | Nonsynonymous coding | 12% |
| MM12T | COCH        | coagulation factor C homolog, cochlin (Limulus polyphemus) | CCDS9640.1      | chr14_31349847-31349847_G_A   | 179R>H  | Substitution | Nonsynonymous coding | 11% |
| MM12T | COG3        | component of oligomeric golgi complex 3                    | CCDS9398.1      | chr13_46065596-46065596_G_A   | 340E>K  | Substitution | Nonsynonymous coding | 30% |
| MM12T | COG4        | component of oligomeric golgi complex 4                    | CCDS10892.2     | chr16_70515300-70515300_G_A   | 733R>W  | Substitution | Nonsynonymous coding | 26% |
| MM12T | COG7        | component of oligomeric golgi complex 7                    | CCDS10610.1     | chr16_23428324-23428324_C_T   | 419C>Y  | Substitution | Nonsynonymous coding | 37% |
| MM12T | COL11A1     | collagen, type XI, alpha 1                                 | CCDS779.1       | chr1_103355065-103355065_T_   | NA      | Deletion     | Frameshift           | 28% |
| MM12T | COL11A2     | collagen, type XI, alpha 2                                 | CCDS43452.1     | chr6_33154556-33154556_C_T    | 216A>T  | Substitution | Nonsynonymous coding | 15% |
| MM12T | COL15A1     | collagen, type XV, alpha 1                                 | CCDS35081.1     | chr9_101749637-101749637_C_A  | 237P>H  | Substitution | Nonsynonymous coding | 37% |
| MM12T | COL16A1     | collagen, type XVI, alpha 1                                | CCDS41297.1     | chr1_32131521-32131521_G_A    | 1140R>X | Substitution | Nonsense             | 10% |
| MM12T | COL17A1     | collagen, type XVII, alpha 1                               | CCDS7554.1      | chr10_105794468-105794468_C_T | 1226R>Q | Substitution | Nonsynonymous coding | 31% |
| MM12T | COL17A1     | collagen, type XVII, alpha 1                               | CCDS7554.1      | chr10_105809853-105809853_G_T | 720L>I  | Substitution | Nonsynonymous coding | 33% |
| MM12T | COL18A1     | -                                                          | NM_130444       | chr21_46897667-46897667_G_T   | 752G>C  | Substitution | Nonsynonymous coding | 29% |
| MM12T | COL18A1-AS1 | COL18A1 antisense RNA 1                                    | ENST00000330082 | chr21_46841314-46841314_G_A   | 125S>F  | Substitution | Nonsynonymous coding | 33% |
| MM12T | COL1A2      | collagen, type I, alpha 2                                  | CCDS34682.1     | chr7_94029581-94029581_G_C    | 69G>A   | Substitution | Nonsynonymous coding | 31% |
| MM12T | COL20A1     | collagen, type XX, alpha 1                                 | CCDS46628.1     | chr20_61938964-61938964_G_A   | 207A>T  | Substitution | Nonsynonymous coding | 12% |
| MM12T | COL20A1     | collagen, type XX, alpha 1                                 | CCDS46628.1     | chr20_61948034-61948034_G_T   | 885R>I  | Substitution | Nonsynonymous coding | 39% |
| MM12T | COL20A1     | collagen, type XX, alpha 1                                 | CCDS46628.1     | chr20_61956797-61956797_C_T   | 1100P>L | Substitution | Nonsynonymous coding | 28% |
| MM12T | COL20A1     | collagen, type XX, alpha 1                                 | CCDS46628.1     | chr20_61959785-61959785_G_A   | 1239G>D | Substitution | Nonsynonymous coding | 12% |
| MM12T | COL22A1     | collagen, type XXII, alpha 1                               | CCDS6376.1      | chr8_139697533-139697533_C_A  | 962S>I  | Substitution | Nonsynonymous coding | 26% |
| MM12T | COL23A1     | collagen, type XXIII, alpha 1                              | CCDS4436.1      | chr5_177675209-177675209_C_T  | 399S>N  | Substitution | Nonsynonymous coding | 36% |
| MM12T | COL27A1     | collagen, type XXVII, alpha 1                              | CCDS6802.1      | chr9_117054471-117054471_C_A  | 1522P>H | Substitution | Nonsynonymous coding | 14% |
| MM12T | COL28A1     | collagen, type XXVIII, alpha 1                             | CCDS43553.1     | chr7_7410432-7410432_G_A      | 997P>L  | Substitution | Nonsynonymous coding | 18% |
| MM12T | COL28A1     | collagen, type XXVIII, alpha 1                             | CCDS43553.1     | chr7_7516743-7516743_C_A      | 411K>N  | Substitution | Nonsynonymous coding | 30% |
| MM12T | COL4A2      | collagen, type IV, alpha 2                                 | CCDS41907.1     | chr13_111143678-111143678_G_T | 1149G>X | Substitution | Nonsense             | 31% |
| MM12T | COL4A3      | collagen, type IV, alpha 3 (Goodpasture antigen)           | CCDS42829.1     | chr2_228169778-228169778_A    | NA      | Insertion    | Frameshift           | 24% |
| MM12T | COL4A4      | collagen, type IV, alpha 4                                 | CCDS42828.1     | chr2_227942732-227942732_C_T  | 622G>D  | Substitution | Nonsynonymous coding | 28% |
| MM12T | COL4A5      | collagen, type IV, alpha 5                                 | CCDS35366.1     | chrX_107938509-107938509_G_T  | 1612G>W | Substitution | Nonsynonymous coding | 25% |
| MM12T | COL4A6      | collagen, type IV, alpha 6                                 | CCDS14541.1     | chrX_107422033-107422033_C_T  | 800R>Q  | Substitution | Nonsynonymous coding | 28% |



|       |             |                                                                     |             |                              |         |              |                      |     |
|-------|-------------|---------------------------------------------------------------------|-------------|------------------------------|---------|--------------|----------------------|-----|
| MM12T | COL4A6      | collagen, type IV, alpha 6                                          | CCDS14541.1 | chrX_107431769-107431769_G_A | 523A>V  | Substitution | Nonsynonymous coding | 13% |
| MM12T | COL5A1      | collagen, type V, alpha 1                                           | CCDS6982.1  | chr9_137717709-137717709_G_  | NA      | Deletion     | Frameshift           | 33% |
| MM12T | COL5A1      | collagen, type V, alpha 1                                           | CCDS6982.1  | chr9_137620531-137620531_G_A | 268G>S  | Substitution | Nonsynonymous coding | 29% |
| MM12T | COL5A2      | collagen, type V, alpha 2                                           | CCDS33350.1 | chr2_189921719-189921719_C_T | 791A>T  | Substitution | Nonsynonymous coding | 20% |
| MM12T | COL5A3      | collagen, type V, alpha 3                                           | CCDS12222.1 | chr19_10073514-10073514_G_A  | 1611T>I | Substitution | Nonsynonymous coding | 31% |
| MM12T | COL5A3      | collagen, type V, alpha 3                                           | CCDS12222.1 | chr19_10116662-10116662_C_A  | ISV-1>  | Substitution | Splice site acceptor | 15% |
| MM12T | COL6A1      | collagen, type VI, alpha 1                                          | CCDS13727.1 | chr21_47421187-47421187_G_A  | 615D>N  | Substitution | Nonsynonymous coding | 14% |
| MM12T | COL6A1      | collagen, type VI, alpha 1                                          | CCDS13727.1 | chr21_47423917-47423917_C_T  | 1026A>V | Substitution | Nonsynonymous coding | 10% |
| MM12T | COL6A2      | collagen, type VI, alpha 2                                          | CCDS13728.1 | chr21_47545474-47545474_G_A  | 638V>I  | Substitution | Nonsynonymous coding | 31% |
| MM12T | COL6A3      | collagen, type VI, alpha 3                                          | CCDS33412.1 | chr2_238244972-238244972_G_A | 2924A>V | Substitution | Nonsynonymous coding | 14% |
| MM12T | COL6A6      | collagen, type VI, alpha 6                                          | CCDS46911.1 | chr3_130282110-130282110_G_A | 88S>N   | Substitution | Nonsynonymous coding | 33% |
| MM12T | COL6A6      | collagen, type VI, alpha 6                                          | CCDS46911.1 | chr3_130284144-130284144_G_A | 323R>Q  | Substitution | Nonsynonymous coding | 29% |
| MM12T | COL7A1      | collagen, type VII, alpha 1                                         | CCDS2773.1  | chr3_48628126-48628126_C_A   | 587S>I  | Substitution | Nonsynonymous coding | 31% |
| MM12T | COL7A1      | collagen, type VII, alpha 1                                         | CCDS2773.1  | chr3_48612975-48612975_G_A   | ISV-3>  | Substitution | Splice site acceptor | 32% |
| MM12T | COL7A1      | collagen, type VII, alpha 1                                         | CCDS2773.1  | chr3_48622196-48622196_G_A   | 1340R>X | Substitution | Nonsense             | 31% |
| MM12T | COL9A1      | collagen, type IX, alpha 1                                          | CCDS4971.1  | chr6_71011713-71011713_G_A   | 27R>C   | Substitution | Nonsynonymous coding | 17% |
| MM12T | COLEC12     | collectin sub-family member 12                                      | CCDS32782.1 | chr18_347104-347104_G_A      | 173A>V  | Substitution | Nonsynonymous coding | 37% |
| MM12T | COPA        | coatamer protein complex, subunit alpha                             | CCDS41424.1 | chr1_160302240-160302240_G_T | 165S>Y  | Substitution | Nonsynonymous coding | 23% |
| MM12T | COPB1       | coatamer protein complex, subunit beta 1                            | CCDS7815.1  | chr11_14507924-14507924_T_C  | 276T>A  | Substitution | Nonsynonymous coding | 28% |
| MM12T | COPG1       | coatamer protein complex, subunit gamma 1                           | CCDS33851.1 | chr3_128985870-128985870_C_T | 491A>V  | Substitution | Nonsynonymous coding | 33% |
| MM12T | COPG2       | coatamer protein complex, subunit gamma 2                           | NM_012133   | chr7_130148405-130148405_C_T | 279C>Y  | Substitution | Nonsynonymous coding | 31% |
| MM12T | COP57A      | COP9 constitutive photomorphogenic homolog subunit 7A (Arabidopsis) | CCDS8558.1  | chr12_6838452-6838452_C_T    | 123R>C  | Substitution | Nonsynonymous coding | 11% |
| MM12T | COQ3        | coenzyme Q3 homolog, methyltransferase (S. cerevisiae)              | CCDS5042.1  | chr6_99817700-99817700_A_    | NA      | Deletion     | Splice site acceptor | 13% |
| MM12T | COQ9        | coenzyme Q9 homolog (S. cerevisiae)                                 | CCDS32459.1 | chr16_57493636-57493636_G_A  | ISV+4>  | Substitution | Splice site donor    | 34% |
| MM12T | CORIN       | corin, serine peptidase                                             | CCDS3477.1  | chr4_47644064-47644064_T_C   | 691T>A  | Substitution | Nonsynonymous coding | 40% |
| MM12T | CORIN       | corin, serine peptidase                                             | CCDS3477.1  | chr4_47765474-47765474_C_T   | 180R>H  | Substitution | Nonsynonymous coding | 11% |
| MM12T | CORIN       | corin, serine peptidase                                             | CCDS3477.1  | chr4_47746603-47746603_A_    | NA      | Deletion     | Splice site acceptor | 33% |
| MM12T | CORO1B      | coronin, actin binding protein, 1B                                  | CCDS8164.1  | chr11_67208688-67208688_G_A  | 222R>W  | Substitution | Nonsynonymous coding | 31% |
| MM12T | CORO2B      | coronin, actin binding protein, 2B                                  | NM_006091   | chr15_68937691-68937691_C_A  | 70L>M   | Substitution | Nonsynonymous coding | 13% |
| MM12T | CORO7-PAM16 | CORO7-PAM16 readthrough                                             | CCDS10513.1 | chr16_4455536-4455536_C_T    | 174A>T  | Substitution | Nonsynonymous coding | 28% |
| MM12T | COTL1       | coactosin-like 1 (Dictyostelium)                                    | CCDS10947.1 | chr16_84623863-84623863_C_T  | 56V>I   | Substitution | Nonsynonymous coding | 11% |
| MM12T | COX18       | cytochrome c oxidase assembly homolog 18 (yeast)                    | CCDS3554.1  | chr4_73935080-73935080_G_A   | 96A>V   | Substitution | Nonsynonymous coding | 14% |

|       |         |                                                             |             |                               |         |              |                      |     |
|-------|---------|-------------------------------------------------------------|-------------|-------------------------------|---------|--------------|----------------------|-----|
| MM12T | COX18   | cytochrome c oxidase assembly homolog 18 (yeast)            | CCDS3554.1  | chr4_73931081-73931081_G_A    | 162R>X  | Substitution | Nonsense             | 13% |
| MM12T | CP      | ceruloplasmin (ferroxidase)                                 | CCDS3141.1  | chr3_148903178-148903178_T_G  | 711Q>H  | Substitution | Nonsynonymous coding | 23% |
| MM12T | CPA5    | carboxypeptidase A5                                         | CCDS5819.1  | chr7_130007228-130007228_G_A  | 285S>N  | Substitution | Nonsynonymous coding | 53% |
| MM12T | CPEB1   | cytoplasmic polyadenylation element binding protein 1       | CCDS45329.1 | chr15_83221363-83221363_T_A   | 356Y>F  | Substitution | Nonsynonymous coding | 35% |
| MM12T | CPEB2   | cytoplasmic polyadenylation element binding protein 2       | CCDS3412.1  | chr4_15063798-15063798_C_T    | 486R>X  | Substitution | Nonsense             | 11% |
| MM12T | CPEB3   | cytoplasmic polyadenylation element binding protein 3       | CCDS31246.1 | chr10_93812185-93812185_C_A   | 627K>N  | Substitution | Nonsynonymous coding | 33% |
| MM12T | CPLX1   | complexin 1                                                 | CCDS46995.1 | chr4_780462-780462_G_A        | 78R>C   | Substitution | Nonsynonymous coding | 15% |
| MM12T | CPNE1   | copine I                                                    | CCDS46595.1 | chr20_34215288-34215288_G_A   | 389R>C  | Substitution | Nonsynonymous coding | 41% |
| MM12T | CPNE4   | copine IV                                                   | CCDS3072.1  | chr3_131442447-131442447_C_T  | 68R>H   | Substitution | Nonsynonymous coding | 26% |
| MM12T | CPNE7   | copine VII                                                  | CCDS10980.1 | chr16_89657640-89657640_C_T   | 500A>V  | Substitution | Nonsynonymous coding | 11% |
| MM12T | CPO     | carboxypeptidase O                                          | CCDS2372.1  | chr2_207814396-207814396_C_A  | 42L>M   | Substitution | Nonsynonymous coding | 10% |
| MM12T | CPOX    | coproporphyrinogen oxidase                                  | CCDS2932.1  | chr3_98307633-98307633_C_T    | 293A>T  | Substitution | Nonsynonymous coding | 16% |
| MM12T | CPS1    | carbamoyl-phosphate synthase 1, mitochondrial               | CCDS46505.1 | chr2_211442196-211442196_G_A  | 151A>T  | Substitution | Nonsynonymous coding | 33% |
| MM12T | CPSF1   | cleavage and polyadenylation specific factor 1, 160kDa      | CCDS34966.1 | chr8_145618997-145618997_C_T  | 1344G>S | Substitution | Nonsynonymous coding | 37% |
| MM12T | CPSF4   | cleavage and polyadenylation specific factor 4, 30kDa       | CCDS5664.1  | chr7_99047957-99047957_G_T    | 122K>N  | Substitution | Nonsynonymous coding | 33% |
| MM12T | CPT1B   | carnitine palmitoyltransferase 1B (muscle)                  | CCDS14098.1 | chr22_51015350-51015350_A_G   | 132L>P  | Substitution | Nonsynonymous coding | 11% |
| MM12T | CPT1C   | carnitine palmitoyltransferase 1C                           | CCDS12779.1 | chr19_50208355-50208355_G_A   | 288R>H  | Substitution | Nonsynonymous coding | 26% |
| MM12T | CPXM1   | carboxypeptidase X (M14 family), member 1                   | CCDS13033.1 | chr20_2775056-2775056_C_T     | 662R>H  | Substitution | Nonsynonymous coding | 19% |
| MM12T | CPXM2   | carboxypeptidase X (M14 family), member 2                   | CCDS7637.1  | chr10_125639816-125639816_C_T | 105S>N  | Substitution | Nonsynonymous coding | 28% |
| MM12T | CPXM2   | carboxypeptidase X (M14 family), member 2                   | CCDS7637.1  | chr10_125651123-125651123_A_G | 18V>A   | Substitution | Nonsynonymous coding | 12% |
| MM12T | CRADD   | CASP2 and RIPK1 domain containing adaptor with death domain | CCDS9048.1  | chr12_94072579-94072579_G_A   | 10R>H   | Substitution | Nonsynonymous coding | 14% |
| MM12T | CRAMP1L | Crm, cramped-like (Drosophila)                              | CCDS10440.2 | chr16_1706446-1706446_G_A     | 563R>H  | Substitution | Nonsynonymous coding | 38% |
| MM12T | CRAMP1L | Crm, cramped-like (Drosophila)                              | CCDS10440.2 | chr16_1706786-1706786_G_T     | 676E>D  | Substitution | Nonsynonymous coding | 30% |
| MM12T | CRB1    | crumbs homolog 1 (Drosophila)                               | CCDS1390.1  | chr1_197326065-197326065_C_T  | 365R>C  | Substitution | Nonsynonymous coding | 26% |
| MM12T | CRB2    | crumbs homolog 2 (Drosophila)                               | CCDS6852.2  | chr9_126135424-126135424_G_A  | 872A>T  | Substitution | Nonsynonymous coding | 12% |
| MM12T | CREBBP  | CREB binding protein                                        | CCDS10509.1 | chr16_3779340-3779340_G_A     | 1903P>L | Substitution | Nonsynonymous coding | 14% |
| MM12T | CREBBP  | CREB binding protein                                        | CCDS10509.1 | chr16_3808953-3808953_G_A     | 1091R>C | Substitution | Nonsynonymous coding | 39% |
| MM12T | CREBBP  | CREB binding protein                                        | CCDS10509.1 | chr16_3823801-3823801_G_A     | 805A>V  | Substitution | Nonsynonymous coding | 20% |
| MM12T | CREBBP  | CREB binding protein                                        | CCDS10509.1 | chr16_3842041-3842041_C_T     | 424R>Q  | Substitution | Nonsynonymous coding | 26% |
| MM12T | CRELD1  | cysteine-rich with EGF-like domains 1                       | CCDS33693.1 | chr3_9982533-9982533_G_A      | ISV-1>  | Substitution | Splice site acceptor | 25% |
| MM12T | CREM    | cAMP responsive element modulator                           | CCDS7180.1  | chr10_35467886-35467886_G_T   | 80E>X   | Substitution | Nonsense             | 25% |
| MM12T | CRIM1   | cysteine rich transmembrane BMP regulator 1 (chordin-like)  | CCDS1783.1  | chr2_36740819-36740819_G_A    | 634G>E  | Substitution | Nonsynonymous coding | 14% |

|       |           |                                                           |                 |                               |         |              |                      |     |
|-------|-----------|-----------------------------------------------------------|-----------------|-------------------------------|---------|--------------|----------------------|-----|
| MM12T | CRIP2     | cysteine-rich protein 2                                   | CCDS10003.1     | chr14_105945155-105945155_C_T | 95A>V   | Substitution | Nonsynonymous coding | 21% |
| MM12T | CRNKL1    | crooked neck pre-mRNA splicing factor-like 1 (Drosophila) | CCDS33446.1     | chr20_20019096-20019096_T_C   | ISV-2>  | Substitution | Splice site acceptor | 23% |
| MM12T | CROCC     | ciliary rootlet coiled-coil, rootletin                    | CCDS30616.1     | chr1_17296329-17296329_G_A    | 1784S>N | Substitution | Nonsynonymous coding | 34% |
| MM12T | CRP       | C-reactive protein, pentraxin-related                     | CCDS30911.1     | chr1_159684241-159684241_C_T  | 12S>N   | Substitution | Nonsynonymous coding | 29% |
| MM12T | CRTAC1    | cartilage acidic protein 1                                | CCDS31266.1     | chr10_99625444-99625444_C_T   | 616R>H  | Substitution | Nonsynonymous coding | 15% |
| MM12T | CRTAC1    | cartilage acidic protein 1                                | CCDS31266.1     | chr10_99677284-99677284_C_T   | 230A>T  | Substitution | Nonsynonymous coding | 32% |
| MM12T | CRTAC1    | cartilage acidic protein 1                                | CCDS31266.1     | chr10_99770988-99770988_G_T   | 44P>H   | Substitution | Nonsynonymous coding | 11% |
| MM12T | CRTC2     | CREB regulated transcription coactivator 2                | CCDS30875.1     | chr1_153924538-153924538_C_T  | 318G>D  | Substitution | Nonsynonymous coding | 28% |
| MM12T | CRYBA4    | crystallin, beta A4                                       | CCDS13841.1     | chr22_27024263-27024263_C_A   | 104D>E  | Substitution | Nonsynonymous coding | 24% |
| MM12T | CRYBA4    | crystallin, beta A4                                       | CCDS13841.1     | chr22_27026429-27026429_G_T   | 190S>I  | Substitution | Nonsynonymous coding | 34% |
| MM12T | CRYBA4    | crystallin, beta A4                                       | CCDS13841.1     | chr22_27021497-27021497_C_T   | 71R>X   | Substitution | Nonsense             | 19% |
| MM12T | CRYBB1    | crystallin, beta B1                                       | CCDS13840.1     | chr22_26995521-26995521_C_T   | 231R>H  | Substitution | Nonsynonymous coding | 20% |
| MM12T | CRYBG3    | beta-gamma crystallin domain containing 3                 | CCDS43113.1     | chr3_97596589-97596589_C_A    | 236P>H  | Substitution | Nonsynonymous coding | 24% |
| MM12T | CRYGB     | crystallin, gamma B                                       | CCDS2380.1      | chr2_209010536-209010536_G_T  | 72L>I   | Substitution | Nonsynonymous coding | 36% |
| MM12T | CRYL1     | crystallin, lambda 1                                      | CCDS41871.1     | chr13_21006252-21006252_G_A   | 208R>W  | Substitution | Nonsynonymous coding | 30% |
| MM12T | CRYM      | crystallin, mu                                            | CCDS10597.1     | chr16_21281185-21281185_G_T   | 139L>M  | Substitution | Nonsynonymous coding | 13% |
| MM12T | CSF1      | colony stimulating factor 1 (macrophage)                  | CCDS816.1       | chr1_110459960-110459960_G_A  | 91D>N   | Substitution | Nonsynonymous coding | 15% |
| MM12T | CSF1      | colony stimulating factor 1 (macrophage)                  | CCDS816.1       | chr1_110459981-110459981_C_T  | 98R>C   | Substitution | Nonsynonymous coding | 28% |
| MM12T | CSF1      | colony stimulating factor 1 (macrophage)                  | CCDS816.1       | chr1_110466319-110466319_C_T  | 359P>L  | Substitution | Nonsynonymous coding | 30% |
| MM12T | CSF3R     | colony stimulating factor 3 receptor (granulocyte)        | CCDS414.1       | chr1_36939086-36939086_G_A    | 208A>V  | Substitution | Nonsynonymous coding | 37% |
| MM12T | CSMD1     | CUB and Sushi multiple domains 1                          | NM_033225       | chr8_2808725-2808725_G_A      | 3371A>V | Substitution | Nonsynonymous coding | 47% |
| MM12T | CSMD1     | CUB and Sushi multiple domains 1                          | NM_033225       | chr8_3265447-3265447_C_T      | 682G>D  | Substitution | Nonsynonymous coding | 33% |
| MM12T | CSMD2     | CUB and Sushi multiple domains 2                          | CCDS380.1       | chr1_34034979-34034979_C_T    | 2711C>Y | Substitution | Nonsynonymous coding | 30% |
| MM12T | CSMD2     | CUB and Sushi multiple domains 2                          | CCDS380.1       | chr1_34180240-34180240_G_A    | 1078T>M | Substitution | Nonsynonymous coding | 38% |
| MM12T | CSMD3     | CUB and Sushi multiple domains 3                          | CCDS6315.1      | chr8_113314166-113314166_G_A  | 2766P>S | Substitution | Nonsynonymous coding | 35% |
| MM12T | CSMD3     | CUB and Sushi multiple domains 3                          | CCDS6315.1      | chr8_113402916-113402916_C_A  | 1971V>L | Substitution | Nonsynonymous coding | 21% |
| MM12T | CSMD3     | CUB and Sushi multiple domains 3                          | CCDS6315.1      | chr8_113293532-113293532_G_A  | 3127R>X | Substitution | Nonsense             | 23% |
| MM12T | CSNK1A1P1 | casein kinase 1, alpha 1 pseudogene 1                     | ENST00000430593 | chr15_37110596-37110596_G_A   | 22A>V   | Substitution | Nonsynonymous coding | 40% |
| MM12T | CSNK1G2   | casein kinase 1, gamma 2                                  | CCDS12077.1     | chr19_1980183-1980183_C_T     | 410S>L  | Substitution | Nonsynonymous coding | 16% |
| MM12T | CSNK2A1   | casein kinase 2, alpha 1 polypeptide                      | CCDS13003.1     | chr20_468128-468128_G_A       | 306R>X  | Substitution | Nonsense             | 11% |
| MM12T | CSNK2A2   | casein kinase 2, alpha prime polypeptide                  | CCDS10794.1     | chr16_58200581-58200581_C_T   | 245R>H  | Substitution | Nonsynonymous coding | 20% |
| MM12T | CSPG5     | chondroitin sulfate proteoglycan 5 (neuroglycan C)        | CCDS2757.1      | chr3_47618438-47618438_G_A    | 360R>C  | Substitution | Nonsynonymous coding | 11% |

|       |               |                                                                                 |                 |                               |         |              |                      |     |
|-------|---------------|---------------------------------------------------------------------------------|-----------------|-------------------------------|---------|--------------|----------------------|-----|
| MM12T | CSPG5         | chondroitin sulfate proteoglycan 5 (neuroglycan C)                              | CCDS2757.1      | chr3_47619097-47619097_G_A    | 140P>L  | Substitution | Nonsynonymous coding | 33% |
| MM12T | CSRP2BP       | CSRP2 binding protein                                                           | CCDS13133.1     | chr20_18163773-18163773_T_A   | 605D>E  | Substitution | Nonsynonymous coding | 31% |
| MM12T | CST4          | cystatin 5                                                                      | CCDS13159.1     | chr20_23666550-23666550_G_T   | 136S>Y  | Substitution | Nonsynonymous coding | 35% |
| MM12T | CST8          | cystatin 8 (cystatin-related epididymal specific)                               | CCDS13156.1     | chr20_23473616-23473616_C_A   | 85L>I   | Substitution | Nonsynonymous coding | 22% |
| MM12T | CST9LP1       | cystatin 9-like pseudogene 1                                                    | ENST00000376987 | chr20_23531135-23531135_T_C   | 52E>G   | Substitution | Nonsynonymous coding | 39% |
| MM12T | CSTL1         | cystatin-like 1                                                                 | CCDS13153.1     | chr20_23421076-23421076_G_A   | 58D>N   | Substitution | Nonsynonymous coding | 29% |
| MM12T | CTBP1-AS1     | CTBP1 antisense RNA 1                                                           | CCDS33935.1     | chr4_1244378-1244378_G_A      | 6C>Y    | Substitution | Nonsynonymous coding | 21% |
| MM12T | CTBP2         | C-terminal binding protein 2                                                    | CCDS7644.1      | chr10_126715658-126715658_G_T | 224A>D  | Substitution | Nonsynonymous coding | 13% |
| MM12T | CTBS          | chitinase, di-N-acetyl-                                                         | CCDS698.1       | chr1_85020853-85020853_C_A    | 329W>C  | Substitution | Nonsynonymous coding | 17% |
| MM12T | CTCF          | CCCTC-binding factor (zinc finger protein)                                      | CCDS10841.1     | chr16_67650720-67650720_G_A   | 342R>H  | Substitution | Nonsynonymous coding | 19% |
| MM12T | CTD-2373H9.6  | differential display clone 8 isoform 2 [Source:RefSeq peptide;Acc:NP_001230469] | ENST00000322630 | chr17_76887261-76887261_G_A   | 442T>M  | Substitution | Nonsynonymous coding | 28% |
| MM12T | CTD-2593A12.4 | -                                                                               | ENST00000423805 | chr5_180409426-180409426_C_T  | 52R>X   | Substitution | Nonsense             | 14% |
| MM12T | CTD-3064H18.4 | -                                                                               | ENST00000316807 | chr19_38039839-38039839_G_A   | 55P>S   | Substitution | Nonsynonymous coding | 35% |
| MM12T | CTD-3088G3.8  | Uncharacterized protein [Source:UniProtKB/TrEMBL;Acc:I3L099]                    | ENST00000344649 | chr16_11554895-11554895_G_A   | 91L>F   | Substitution | Nonsynonymous coding | 35% |
| MM12T | CTGF          | connective tissue growth factor                                                 | CCDS5151.1      | chr6_132270489-132270489_G_A  | 322T>I  | Substitution | Nonsynonymous coding | 23% |
| MM12T | CTIF          | CBP80/20-dependent translation initiation factor                                | CCDS45864.1     | chr18_46284714-46284714_C_T   | 337R>W  | Substitution | Nonsynonymous coding | 12% |
| MM12T | CTIF          | CBP80/20-dependent translation initiation factor                                | CCDS45864.1     | chr18_46287933-46287933_G_A   | 417R>H  | Substitution | Nonsynonymous coding | 11% |
| MM12T | CTNBN1        | catenin (cadherin-associated protein), beta 1, 88kDa                            | CCDS2694.1      | chr3_41265563-41265563_G_A    | 2A>T    | Substitution | Nonsynonymous coding | 12% |
| MM12T | CTNBNL1       | catenin, beta like 1                                                            | CCDS13298.1     | chr20_36361299-36361299_C_T   | 17R>C   | Substitution | Nonsynonymous coding | 29% |
| MM12T | CTNBNL1       | catenin, beta like 1                                                            | CCDS13298.1     | chr20_36361369-36361369_G_A   | 40R>H   | Substitution | Nonsynonymous coding | 10% |
| MM12T | CTNND1        | catenin (cadherin-associated protein), delta 1                                  | CCDS44604.1     | chr11_57559054-57559054_G_A   | 35R>H   | Substitution | Nonsynonymous coding | 12% |
| MM12T | CTNND1        | catenin (cadherin-associated protein), delta 1                                  | CCDS44604.1     | chr11_57572248-57572248_G_A   | 573S>N  | Substitution | Nonsynonymous coding | 12% |
| MM12T | CTR9          | Ctr9, Paf1/RNA polymerase II complex component, homolog (S. cerevisiae)         | CCDS7805.1      | chr11_10788028-10788028_G_T   | 559Q>H  | Substitution | Nonsynonymous coding | 21% |
| MM12T | CTR9          | Ctr9, Paf1/RNA polymerase II complex component, homolog (S. cerevisiae)         | CCDS7805.1      | chr11_10797171-10797171_C_A   | 1029A>D | Substitution | Nonsynonymous coding | 16% |
| MM12T | CTRC          | chymotrypsin C (caldecrin)                                                      | CCDS156.1       | chr1_15772117-15772117_G_A    | 222C>Y  | Substitution | Nonsynonymous coding | 35% |
| MM12T | CTSC          | cathepsin C                                                                     | CCDS8282.1      | chr11_88033712-88033712_G_T   | 248P>H  | Substitution | Nonsynonymous coding | 23% |
| MM12T | CTSH          | cathepsin H                                                                     | CCDS10308.1     | chr15_79220087-79220087_C_T   | 223G>S  | Substitution | Nonsynonymous coding | 24% |
| MM12T | CTSK          | cathepsin K                                                                     | CCDS969.1       | chr1_150771704-150771704_G_A  | 277A>V  | Substitution | Nonsynonymous coding | 14% |
| MM12T | CTSW          | cathepsin W                                                                     | CCDS8117.1      | chr11_65650098-65650098_G_A   | 186R>H  | Substitution | Nonsynonymous coding | 31% |
| MM12T | CTTN          | cortactin                                                                       | CCDS41680.1     | chr11_70279381-70279381_G_A   | 481A>T  | Substitution | Nonsynonymous coding | 29% |
| MM12T | CTU1          | cytosolic thioridylase subunit 1 homolog (S. pombe)                             | CCDS12824.1     | chr19_51602106-51602106_C_T   | 267V>M  | Substitution | Nonsynonymous coding | 13% |
| MM12T | CTU1          | cytosolic thioridylase subunit 1 homolog (S. pombe)                             | CCDS12824.1     | chr19_51607612-51607612_C_T   | 72R>H   | Substitution | Nonsynonymous coding | 32% |

|       |         |                                                                     |                 |                               |         |              |                      |     |
|-------|---------|---------------------------------------------------------------------|-----------------|-------------------------------|---------|--------------|----------------------|-----|
| MM12T | CTU2    | cytosolic thiouridylase subunit 2 homolog ( <i>S. pombe</i> )       | CCDS45545.1     | chr16_88778074-88778074_G_A   | 105R>H  | Substitution | Nonsynonymous coding | 16% |
| MM12T | CUBN    | cubilin (intrinsic factor-cobalamin receptor)                       | CCDS7113.1      | chr10_16932429-16932429_G_A   | 2899T>I | Substitution | Nonsynonymous coding | 31% |
| MM12T | CUBN    | cubilin (intrinsic factor-cobalamin receptor)                       | CCDS7113.1      | chr10_17024583-17024583_C_A   | 1532S>I | Substitution | Nonsynonymous coding | 11% |
| MM12T | CUL4A   | cullin 4A                                                           | CCDS41908.1     | chr13_113899501-113899501_A_G | 494M>V  | Substitution | Nonsynonymous coding | 36% |
| MM12T | CUL5    | cullin 5                                                            | CCDS31668.1     | chr11_107960218-107960218_G_A | ISV-1>  | Substitution | Splice site acceptor | 21% |
| MM12T | CUTC    | cutC copper transporter homolog ( <i>E. coli</i> )                  | CCDS7483.1      | chr10_101515471-101515471_C_A | 266A>D  | Substitution | Nonsynonymous coding | 44% |
| MM12T | CUX1    | cut-like homeobox 1                                                 | CCDS5721.1      | chr7_101844738-101844738_C_T  | 721Q>X  | Substitution | Nonsense             | 32% |
| MM12T | CUX2    | cut-like homeobox 2                                                 | CCDS41837.1     | chr12_111729249-111729249_G_A | 110R>H  | Substitution | Nonsynonymous coding | 15% |
| MM12T | CUX2    | cut-like homeobox 2                                                 | CCDS41837.1     | chr12_111776191-111776191_C_T | 1100R>W | Substitution | Nonsynonymous coding | 13% |
| MM12T | CWF19L2 | CWF19-like 2, cell cycle control ( <i>S. pombe</i> )                | CCDS8336.2      | chr11_107197711-107197711_C_A | 870E>D  | Substitution | Nonsynonymous coding | 27% |
| MM12T | CWH43   | cell wall biogenesis 43 C-terminal homolog ( <i>S. cerevisiae</i> ) | CCDS3486.1      | chr4_48996709-48996709_G_A    | 195W>X  | Substitution | Nonsense             | 12% |
| MM12T | CXCL14  | chemokine (C-X-C motif) ligand 14                                   | CCDS4188.1      | chr5_134914191-134914191_G_A  | 47R>C   | Substitution | Nonsynonymous coding | 31% |
| MM12T | CXCR2   | chemokine (C-X-C motif) receptor 2                                  | CCDS2408.1      | chr2_219000386-219000386_C_T  | 288R>C  | Substitution | Nonsynonymous coding | 36% |
| MM12T | CXCR7   | chemokine (C-X-C motif) receptor 7                                  | CCDS2516.1      | chr2_237490076-237490076_G_T  | 323R>M  | Substitution | Nonsynonymous coding | 26% |
| MM12T | CXorf21 | chromosome X open reading frame 21                                  | CCDS14224.1     | chrX_30577593-30577593_A_G    | 294S>P  | Substitution | Nonsynonymous coding | 13% |
| MM12T | CXorf30 | chromosome X open reading frame 30                                  | ENST00000378653 | chrX_36254939-36254939_C_A    | 163T>K  | Substitution | Nonsynonymous coding | 24% |
| MM12T | CXorf56 | chromosome X open reading frame 56                                  | CCDS14579.1     | chrX_118694231-118694231_C_A  | 81R>I   | Substitution | Nonsynonymous coding | 32% |
| MM12T | CXorf67 | chromosome X open reading frame 67                                  | CCDS14335.1     | chrX_51150515-51150515_G_A    | 216R>H  | Substitution | Nonsynonymous coding | 35% |
| MM12T | CXorf67 | chromosome X open reading frame 67                                  | CCDS14335.1     | chrX_51151196-51151196_C_T    | 443S>F  | Substitution | Nonsynonymous coding | 28% |
| MM12T | CYB5D2  | cytochrome b5 domain containing 2                                   | CCDS11044.1     | chr17_4053193-4053193_G_A     | 87A>T   | Substitution | Nonsynonymous coding | 11% |
| MM12T | CYB5R1  | cytochrome b5 reductase 1                                           | CCDS1431.1      | chr1_202935015-202935015_C_A  | 115K>N  | Substitution | Nonsynonymous coding | 13% |
| MM12T | CYFIP2  | cytoplasmic FMR1 interacting protein 2                              | NM_001037332    | chr5_156750965-156750965_G_A  | 570A>T  | Substitution | Nonsynonymous coding | 38% |
| MM12T | CYFIP2  | cytoplasmic FMR1 interacting protein 2                              | NM_001037332    | chr5_156752587-156752587_G_A  | 641M>I  | Substitution | Nonsynonymous coding | 29% |
| MM12T | CYFIP2  | cytoplasmic FMR1 interacting protein 2                              | NM_001037332    | chr5_156816347-156816347_G_A  | 1120V>I | Substitution | Nonsynonymous coding | 14% |
| MM12T | CYFIP2  | cytoplasmic FMR1 interacting protein 2                              | NM_001037332    | chr5_156766244-156766244_C_A  | 855C>X  | Substitution | Nonsense             | 38% |
| MM12T | CYGB    | cytoglobin                                                          | CCDS11746.1     | chr17_74527753-74527753_G_A   | 55S>L   | Substitution | Nonsynonymous coding | 27% |
| MM12T | CYHR1   | cysteine/histidine-rich 1                                           | CCDS47943.1     | chr8_145677871-145677871_C_T  | 190A>T  | Substitution | Nonsynonymous coding | 12% |
| MM12T | CYP19A1 | cytochrome P450, family 19, subfamily A, polypeptide 1              | CCDS10139.1     | chr15_51529174-51529174_T_C   | 60I>V   | Substitution | Nonsynonymous coding | 29% |
| MM12T | CYP1B1  | cytochrome P450, family 1, subfamily B, polypeptide 1               | CCDS1793.1      | chr2_38301976-38301976_C_T    | 186A>T  | Substitution | Nonsynonymous coding | 32% |
| MM12T | CYP1B1  | cytochrome P450, family 1, subfamily B, polypeptide 1               | CCDS1793.1      | chr2_38302093-38302093_C_T    | 147A>T  | Substitution | Nonsynonymous coding | 12% |
| MM12T | CYP1B1  | cytochrome P450, family 1, subfamily B, polypeptide 1               | CCDS1793.1      | chr2_38302338-38302338_G_A    | 65A>V   | Substitution | Nonsynonymous coding | 33% |
| MM12T | CYP24A1 | cytochrome P450, family 24, subfamily A, polypeptide 1              | CCDS33491.1     | chr20_52773755-52773755_G_T   | 503P>H  | Substitution | Nonsynonymous coding | 43% |

|       |          |                                                                    |                 |                               |         |              |                      |     |
|-------|----------|--------------------------------------------------------------------|-----------------|-------------------------------|---------|--------------|----------------------|-----|
| MM12T | CYP26B1  | cytochrome P450, family 26, subfamily B, polypeptide 1             | CCDS1919.1      | chr2_72360330-72360330_C_T    | 323R>Q  | Substitution | Nonsynonymous coding | 13% |
| MM12T | CYP27A1  | cytochrome P450, family 27, subfamily A, polypeptide 1             | CCDS2423.1      | chr2_219677823-219677823_C_T  | ISV+4>  | Substitution | Splice site donor    | 55% |
| MM12T | CYP27B1  | cytochrome P450, family 27, subfamily B, polypeptide 1             | CCDS8954.1      | chr12_58157931-58157931_G_A   | 389R>C  | Substitution | Nonsynonymous coding | 27% |
| MM12T | CYP2A13  | cytochrome P450, family 2, subfamily A, polypeptide 13             | CCDS12571.1     | chr19_41596035-41596035_C_T   | 143R>C  | Substitution | Nonsynonymous coding | 16% |
| MM12T | CYP2A6   | cytochrome P450, family 2, subfamily A, polypeptide 6              | CCDS12568.1     | chr19_41354570-41354570_G_A   | 148R>C  | Substitution | Nonsynonymous coding | 11% |
| MM12T | CYP2C19  | cytochrome P450, family 2, subfamily C, polypeptide 19             | CCDS7436.1      | chr10_96540336-96540336_G_A   | 188D>N  | Substitution | Nonsynonymous coding | 36% |
| MM12T | CYP2C8   | cytochrome P450, family 2, subfamily C, polypeptide 8              | CCDS7438.1      | chr10_96818190-96818190_G_A   | 241R>X  | Substitution | Nonsense             | 32% |
| MM12T | CYP2D7P1 | cytochrome P450, family 2, subfamily D, polypeptide 7 pseudogene 1 | ENST00000436260 | chr22_42539579-42539579_G_A   | 62R>W   | Substitution | Nonsynonymous coding | 12% |
| MM12T | CYP2W1   | cytochrome P450, family 2, subfamily W, polypeptide 1              | ENST00000415893 | chr7_1028257-1028257_G_A      | 236G>E  | Substitution | Nonsynonymous coding | 33% |
| MM12T | CYP3A5   | cytochrome P450, family 3, subfamily A, polypeptide 5              | ENST00000439761 | chr7_99269491-99269491_G_A    | 110T>M  | Substitution | Nonsynonymous coding | 30% |
| MM12T | CYP4F12  | cytochrome P450, family 4, subfamily F, polypeptide 12             | CCDS42517.1     | chr19_15794431-15794431_C_T   | 259A>V  | Substitution | Nonsynonymous coding | 30% |
| MM12T | CYP4V2   | cytochrome P450, family 4, subfamily V, polypeptide 2              | CCDS34119.1     | chr4_187130367-187130367_C_T  | 449A>V  | Substitution | Nonsynonymous coding | 25% |
| MM12T | CYP51A1  | cytochrome P450, family 51, subfamily A, polypeptide 1             | CCDS5623.1      | chr7_91747904-91747904_C_T    | 371R>H  | Substitution | Nonsynonymous coding | 33% |
| MM12T | CYP8B1   | cytochrome P450, family 8, subfamily B, polypeptide 1              | CCDS2707.1      | chr3_42917161-42917161_G_A    | 50R>W   | Substitution | Nonsynonymous coding | 33% |
| MM12T | CYSLTR1  | cysteinyl leukotriene receptor 1                                   | CCDS14439.1     | chrX_77528587-77528587_T_     | NA      | Deletion     | Frameshift           | 24% |
| MM12T | CYTH1    | cytohesin 1                                                        | CCDS42392.2     | chr17_76705788-76705788_G_A   | 17R>C   | Substitution | Nonsynonymous coding | 27% |
| MM12T | CYTH4    | cytohesin 4                                                        | CCDS13946.1     | chr22_37708164-37708164_G_A   | 354R>H  | Substitution | Nonsynonymous coding | 39% |
| MM12T | CYTIP    | cytohesin 1 interacting protein                                    | CCDS2204.1      | chr2_158300424-158300424_C_A  | 37D>Y   | Substitution | Nonsynonymous coding | 42% |
| MM12T | D2HGDH   | D-2-hydroxyglutarate dehydrogenase                                 | CCDS33426.1     | chr2_242683092-242683092_G_T  | 182E>D  | Substitution | Nonsynonymous coding | 22% |
| MM12T | DAAM2    | dishevelled associated activator of morphogenesis 2                | NM_015345       | chr6_39832234-39832234_C_T    | 95A>V   | Substitution | Nonsynonymous coding | 27% |
| MM12T | DAAM2    | dishevelled associated activator of morphogenesis 2                | NM_015345       | chr6_39869698-39869698_G_A    | 1030R>H | Substitution | Nonsynonymous coding | 12% |
| MM12T | DACH2    | dachshund homolog 2 (Drosophila)                                   | CCDS14455.1     | chrX_85403763-85403763_G_A    | 47V>M   | Substitution | Nonsynonymous coding | 40% |
| MM12T | DACT1    | dapper, antagonist of beta-catenin, homolog 1 (Xenopus laevis)     | CCDS9736.1      | chr14_59113155-59113155_C_T   | 605T>M  | Substitution | Nonsynonymous coding | 19% |
| MM12T | DAGLB    | diacylglycerol lipase, beta                                        | CCDS5350.1      | chr7_6449582-6449582_C_T      | 635M>I  | Substitution | Nonsynonymous coding | 32% |
| MM12T | DAO      | D-amino-acid oxidase                                               | CCDS9122.1      | chr12_109278787-109278787_G_A | 2R>H    | Substitution | Nonsynonymous coding | 27% |
| MM12T | DAO      | D-amino-acid oxidase                                               | CCDS9122.1      | chr12_109278847-109278847_G_A | 22R>H   | Substitution | Nonsynonymous coding | 10% |
| MM12T | DAPK1    | death-associated protein kinase 1                                  | CCDS43842.1     | chr9_90296434-90296434_C_A    | 706S>Y  | Substitution | Nonsynonymous coding | 33% |
| MM12T | DAPK3    | death-associated protein kinase 3                                  | CCDS12116.1     | chr19_3961115-3961115_G_A     | 225T>M  | Substitution | Nonsynonymous coding | 34% |
| MM12T | DAPK3    | death-associated protein kinase 3                                  | CCDS12116.1     | chr19_3964259-3964259_C_T     | 179G>D  | Substitution | Nonsynonymous coding | 36% |
| MM12T | DAPP1    | dual adaptor of phosphotyrosine and 3-phosphoinositides            | CCDS47112.1     | chr4_100774375-100774375_G_A  | 120G>D  | Substitution | Nonsynonymous coding | 12% |
| MM12T | DAZAP1   | DAZ associated protein 1                                           | CCDS12065.1     | chr19_1434765-1434765_G_A     | 360G>R  | Substitution | Nonsynonymous coding | 39% |
| MM12T | DAZAP2   | DAZ associated protein 2                                           | CCDS44885.1     | chr12_51634141-51634141_C_T   | 10Q>X   | Substitution | Nonsense             | 43% |

|       |          |                                                    |                 |                              |         |              |                      |     |
|-------|----------|----------------------------------------------------|-----------------|------------------------------|---------|--------------|----------------------|-----|
| MM12T | DBC1     | deleted in bladder cancer 1                        | CCDS6822.1      | chr9_121976221-121976221_C_A | 300A>S  | Substitution | Nonsynonymous coding | 42% |
| MM12T | DBF4B    | DBF4 homolog B ( <i>S. cerevisiae</i> )            | CCDS11485.1     | chr17_42828026-42828026_C_A  | 418P>H  | Substitution | Nonsynonymous coding | 36% |
| MM12T | DBN1     | drebrin 1                                          | CCDS4421.1      | chr5_176884688-176884688_G_A | 618A>V  | Substitution | Nonsynonymous coding | 36% |
| MM12T | DBT      | dihydroipoamide branched chain transacylase E2     | CCDS767.1       | chr1_100696363-100696363_T_C | 120K>R  | Substitution | Nonsynonymous coding | 18% |
| MM12T | DBX2     | developing brain homeobox 2                        | CCDS31781.1     | chr12_45410358-45410358_G_A  | 244S>F  | Substitution | Nonsynonymous coding | 22% |
| MM12T | DCAF12L1 | DDB1 and CUL4 associated factor 12-like 1          | CCDS14610.1     | chrX_125686039-125686039_G_T | 185L>M  | Substitution | Nonsynonymous coding | 14% |
| MM12T | DCAF12L2 | DDB1 and CUL4 associated factor 12-like 2          | CCDS43991.1     | chrX_125299307-125299307_C_T | 201A>T  | Substitution | Nonsynonymous coding | 28% |
| MM12T | DCAF12L2 | DDB1 and CUL4 associated factor 12-like 2          | CCDS43991.1     | chrX_125299870-125299870_G_A | 13A>V   | Substitution | Nonsynonymous coding | 33% |
| MM12T | DCAF13   | DDB1 and CUL4 associated factor 13                 | CCDS34934.1     | chr8_104427474-104427474_G_A | 86A>T   | Substitution | Nonsynonymous coding | 37% |
| MM12T | DCAKD    | dephospho-CoA kinase domain containing             | CCDS11493.1     | chr17_43102070-43102070_G_A  | 143R>W  | Substitution | Nonsynonymous coding | 13% |
| MM12T | DCC      | deleted in colorectal carcinoma                    | CCDS11952.1     | chr18_50278453-50278453_C_T  | 41R>C   | Substitution | Nonsynonymous coding | 11% |
| MM12T | DCDC5    | doublecortin domain containing 5                   | ENST00000406071 | chr11_30928254-30928254_G_A  | 423P>S  | Substitution | Nonsynonymous coding | 30% |
| MM12T | DCHS1    | dachsous 1 ( <i>Drosophila</i> )                   | CCDS7771.1      | chr11_6648170-6648170_G_A    | 2034R>C | Substitution | Nonsynonymous coding | 12% |
| MM12T | DCHS1    | dachsous 1 ( <i>Drosophila</i> )                   | CCDS7771.1      | chr11_6648895-6648895_C_A    | 1792G>V | Substitution | Nonsynonymous coding | 27% |
| MM12T | DCHS1    | dachsous 1 ( <i>Drosophila</i> )                   | CCDS7771.1      | chr11_6652894-6652894_T_C    | 1210T>A | Substitution | Nonsynonymous coding | 21% |
| MM12T | DCHS2    | dachsous 2 ( <i>Drosophila</i> )                   | CCDS3785.1      | chr4_155158119-155158119_G_A | 2107A>V | Substitution | Nonsynonymous coding | 22% |
| MM12T | DCLK2    | doublecortin-like kinase 2                         | CCDS34076.1     | chr4_151141860-151141860_T_G | 354I>M  | Substitution | Nonsynonymous coding | 34% |
| MM12T | DCLK3    | doublecortin-like kinase 3                         | CCDS43064.1     | chr3_36780096-36780096_A_G   | 19Y>H   | Substitution | Nonsynonymous coding | 10% |
| MM12T | DCX      | doublecortin                                       | CCDS14556.1     | chrX_110574264-110574264_G_A | 353R>X  | Substitution | Nonsense             | 17% |
| MM12T | DDB1     | damage-specific DNA binding protein 1, 127kDa      | CCDS31576.1     | chr11_61070068-61070068_A_G  | 1033V>A | Substitution | Nonsynonymous coding | 15% |
| MM12T | DDB1     | damage-specific DNA binding protein 1, 127kDa      | CCDS31576.1     | chr11_61083841-61083841_C_A  | 442E>D  | Substitution | Nonsynonymous coding | 32% |
| MM12T | DDB1     | damage-specific DNA binding protein 1, 127kDa      | CCDS31576.1     | chr11_61094254-61094254_C_T  | 221A>T  | Substitution | Nonsynonymous coding | 30% |
| MM12T | DDR1     | discoidin domain receptor tyrosine kinase 1        | CCDS47396.1     | chr6_30865941-30865941_C_T   | 776R>W  | Substitution | Nonsynonymous coding | 22% |
| MM12T | DDX20    | DEAD (Asp-Glu-Ala-Asp) box polypeptide 20          | CCDS842.1       | chr1_112305407-112305407_A_  | NA      | Deletion     | Splice site donor    | 21% |
| MM12T | DDX23    | DEAD (Asp-Glu-Ala-Asp) box polypeptide 23          | CCDS8770.1      | chr12_49231357-49231357_G_A  | 235Q>X  | Substitution | Nonsense             | 29% |
| MM12T | DDX24    | DEAD (Asp-Glu-Ala-Asp) box polypeptide 24          | CCDS9918.1      | chr14_94528925-94528925_G_A  | 254A>V  | Substitution | Nonsynonymous coding | 17% |
| MM12T | DDX26B   | DEAD/H (Asp-Glu-Ala-Asp/His) box polypeptide 26B   | CCDS35401.1     | chrX_134715497-134715497_A_  | NA      | Deletion     | Frameshift           | 36% |
| MM12T | DDX26B   | DEAD/H (Asp-Glu-Ala-Asp/His) box polypeptide 26B   | CCDS35401.1     | chrX_134706867-134706867_T_C | 472L>P  | Substitution | Nonsynonymous coding | 18% |
| MM12T | DDX26B   | DEAD/H (Asp-Glu-Ala-Asp/His) box polypeptide 26B   | CCDS35401.1     | chrX_134707863-134707863_G_T | ISV-1>  | Substitution | Splice site acceptor | 24% |
| MM12T | DDX39A   | DEAD (Asp-Glu-Ala-Asp) box polypeptide 39A         | CCDS12308.1     | chr19_14523449-14523449_C_T  | 84V>I   | Substitution | Nonsynonymous coding | 34% |
| MM12T | DDX3X    | DEAD (Asp-Glu-Ala-Asp) box polypeptide 3, X-linked | CCDS43931.1     | chrX_41196698-41196698_G_A   | 28S>N   | Substitution | Nonsynonymous coding | 16% |
| MM12T | DDX4     | DEAD (Asp-Glu-Ala-Asp) box polypeptide 4           | CCDS3969.1      | chr5_55056058-55056058_A_T   | 53H>L   | Substitution | Nonsynonymous coding | 11% |

|       |         |                                           |                 |                               |         |              |                      |     |
|-------|---------|-------------------------------------------|-----------------|-------------------------------|---------|--------------|----------------------|-----|
| MM12T | DDX4    | DEAD (Asp-Glu-Ala-Asp) box polypeptide 4  | CCDS3969.1      | chr5_55076927-55076927_G_A    | 177R>H  | Substitution | Nonsynonymous coding | 17% |
| MM12T | DDX41   | DEAD (Asp-Glu-Ala-Asp) box polypeptide 41 | CCDS4427.1      | chr5_176941760-176941760_G_A  | 293R>C  | Substitution | Nonsynonymous coding | 37% |
| MM12T | DDX42   | DEAD (Asp-Glu-Ala-Asp) box polypeptide 42 | CCDS32704.1     | chr17_61883905-61883905_C_A   | 246A>D  | Substitution | Nonsynonymous coding | 12% |
| MM12T | DDX42   | DEAD (Asp-Glu-Ala-Asp) box polypeptide 42 | CCDS32704.1     | chr17_61890641-61890641_C_T   | 577R>X  | Substitution | Nonsense             | 11% |
| MM12T | DDX50   | DEAD (Asp-Glu-Ala-Asp) box polypeptide 50 | CCDS7283.1      | chr10_70673300-70673300_T_A   | 304V>D  | Substitution | Nonsynonymous coding | 22% |
| MM12T | DDX53   | DEAD (Asp-Glu-Ala-Asp) box polypeptide 53 | CCDS35214.1     | chrX_23018203-23018203_G_T    | 10R>M   | Substitution | Nonsynonymous coding | 22% |
| MM12T | DDX53   | DEAD (Asp-Glu-Ala-Asp) box polypeptide 53 | CCDS35214.1     | chrX_23019613-23019613_C_T    | 480A>V  | Substitution | Nonsynonymous coding | 25% |
| MM12T | DDX53   | DEAD (Asp-Glu-Ala-Asp) box polypeptide 53 | CCDS35214.1     | chrX_23019628-23019628_G_A    | 485S>N  | Substitution | Nonsynonymous coding | 29% |
| MM12T | DDX54   | DEAD (Asp-Glu-Ala-Asp) box polypeptide 54 | CCDS44984.1     | chr12_113617007-113617007_C_T | 169A>T  | Substitution | Nonsynonymous coding | 12% |
| MM12T | DDX56   | DEAD (Asp-Glu-Ala-Asp) box helicase 56    | ENST0000448192  | chr7_44605970-44605970_G_A    | 153A>V  | Substitution | Nonsynonymous coding | 12% |
| MM12T | DDX60   | DEAD (Asp-Glu-Ala-Asp) box polypeptide 60 | CCDS34097.1     | chr4_169183889-169183889_C_T  | 1030S>N | Substitution | Nonsynonymous coding | 15% |
| MM12T | DDX60   | DEAD (Asp-Glu-Ala-Asp) box polypeptide 60 | CCDS34097.1     | chr4_169227552-169227552_C_A  | 195R>I  | Substitution | Nonsynonymous coding | 35% |
| MM12T | DDX60   | DEAD (Asp-Glu-Ala-Asp) box polypeptide 60 | CCDS34097.1     | chr4_169206026-169206026_C_T  | 502W>X  | Substitution | Nonsense             | 31% |
| MM12T | DEAF1   | DEAF1 transcription factor                | CCDS31327.1     | chr11_679706-679706_C_T       | 370V>I  | Substitution | Nonsynonymous coding | 12% |
| MM12T | DEDD2   | death effector domain containing 2        | CCDS12597.1     | chr19_42703613-42703613_G_A   | 320R>W  | Substitution | Nonsynonymous coding | 12% |
| MM12T | DEFB118 | defensin, beta 118                        | CCDS13177.1     | chr20_29956497-29956497_C_T   | 15P>L   | Substitution | Nonsynonymous coding | 15% |
| MM12T | DEGS1   | delta(4)-desaturase, sphingolipid 1       | CCDS1540.1      | chr1_224377387-224377387_T_C  | 64L>S   | Substitution | Nonsynonymous coding | 25% |
| MM12T | DEK     | DEK oncogene                              | CCDS34344.1     | chr6_18237651-18237651_T_G    | 287S>R  | Substitution | Nonsynonymous coding | 12% |
| MM12T | DENND2C | DENN/MADD domain containing 2C            | CCDS875.1       | chr1_115167854-115167854_G_A  | 251S>F  | Substitution | Nonsynonymous coding | 26% |
| MM12T | DEPDC1  | DEP domain containing 1                   | CCDS44159.1     | chr1_68948460-68948460_C_T    | 344C>Y  | Substitution | Nonsynonymous coding | 21% |
| MM12T | DEPDC1B | DEP domain containing 1B                  | CCDS3977.1      | chr5_59899273-59899273_G_T    | 396P>H  | Substitution | Nonsynonymous coding | 37% |
| MM12T | DERL3   | derlin 3                                  | CCDS46672.1     | chr22_24181111-24181111_C_T   | 22A>T   | Substitution | Nonsynonymous coding | 20% |
| MM12T | DESI2   | desumoylating isopeptidase 2              | CCDS1626.1      | chr1_244868954-244868954_C_T  | 150L>F  | Substitution | Nonsynonymous coding | 28% |
| MM12T | DET1    | de-etiolated homolog 1 (Arabidopsis)      | CCDS45343.1     | chr15_89074905-89074905_C_T   | 22R>Q   | Substitution | Nonsynonymous coding | 31% |
| MM12T | DFNB31  | deafness, autosomal recessive 31          | CCDS6806.1      | chr9_117185746-117185746_C_T  | 492D>N  | Substitution | Nonsynonymous coding | 13% |
| MM12T | DFNB31  | deafness, autosomal recessive 31          | CCDS6806.1      | chr9_117228647-117228647_C_T  | 288R>Q  | Substitution | Nonsynonymous coding | 31% |
| MM12T | DGAT2   | diacylglycerol O-acyltransferase 2        | CCDS31642.1     | chr11_75507547-75507547_C_T   | 202P>S  | Substitution | Nonsynonymous coding | 15% |
| MM12T | DGAT2L6 | diacylglycerol O-acyltransferase 2-like 6 | CCDS14397.1     | chrX_69419117-69419117_C_T    | ISV-4>  | Substitution | Splice site acceptor | 26% |
| MM12T | DGCR8   | DiGeorge syndrome critical region gene 8  | CCDS13773.1     | chr22_20073737-20073737_G_A   | 84R>H   | Substitution | Nonsynonymous coding | 11% |
| MM12T | DGKB    | diacylglycerol kinase, beta 90kDa         | CCDS47547.1     | chr7_14722443-14722443_G_A    | 285R>C  | Substitution | Nonsynonymous coding | 31% |
| MM12T | DGKG    | diacylglycerol kinase, gamma 90kDa        | CCDS3274.1      | chr3_186002489-186002489_C_T  | 185R>H  | Substitution | Nonsynonymous coding | 29% |
| MM12T | DGKI    | diacylglycerol kinase, iota               | ENST00000424189 | chr7_137230658-137230658_C_T  | 733G>D  | Substitution | Nonsynonymous coding | 18% |



|       |        |                                                         |              |                              |         |              |                      |     |
|-------|--------|---------------------------------------------------------|--------------|------------------------------|---------|--------------|----------------------|-----|
| MM12T | DGKQ   | diacylglycerol kinase, theta 110kDa                     | CCDS3342.1   | chr4_956248-956248_T_C       | 730D>G  | Substitution | Nonsynonymous coding | 22% |
| MM12T | DHCR7  | 7-dehydrocholesterol reductase                          | CCDS8200.1   | chr11_71150122-71150122_T_C  | 212T>A  | Substitution | Nonsynonymous coding | 36% |
| MM12T | DHODH  | dihydroorotate dehydrogenase (quinone)                  | CCDS42192.1  | chr16_72055088-72055088_G_A  | 195A>T  | Substitution | Nonsynonymous coding | 32% |
| MM12T | DHODH  | dihydroorotate dehydrogenase (quinone)                  | CCDS42192.1  | chr16_72058069-72058069_G_A  | 387D>N  | Substitution | Nonsynonymous coding | 25% |
| MM12T | DHRS12 | dehydrogenase/reductase (SDR family) member 12          | CCDS31976.1  | chr13_52346002-52346002_C_T  | 172A>T  | Substitution | Nonsynonymous coding | 14% |
| MM12T | DHRS7  | dehydrogenase/reductase (SDR family) member 7           | CCDS9743.1   | chr14_60616897-60616897_A_   | NA      | Deletion     | Frameshift           | 18% |
| MM12T | DHRS7C | dehydrogenase/reductase (SDR family) member 7C          | NM_001105571 | chr17_9676237-9676237_C_T    | 192A>T  | Substitution | Nonsynonymous coding | 45% |
| MM12T | DHTKD1 | dehydrogenase E1 and transketolase domain containing 1  | CCDS7087.1   | chr10_12160908-12160908_C_A  | 855H>N  | Substitution | Nonsynonymous coding | 24% |
| MM12T | DHTKD1 | dehydrogenase E1 and transketolase domain containing 1  | CCDS7087.1   | chr10_12162882-12162882_G_A  | 919A>T  | Substitution | Nonsynonymous coding | 47% |
| MM12T | DHX15  | DEAH (Asp-Glu-Ala-His) box polypeptide 15               | CCDS33966.1  | chr4_24538752-24538752_C_A   | 611D>Y  | Substitution | Nonsynonymous coding | 19% |
| MM12T | DHX16  | DEAH (Asp-Glu-Ala-His) box polypeptide 16               | CCDS4685.1   | chr6_30627338-30627338_G_A   | 640R>W  | Substitution | Nonsynonymous coding | 47% |
| MM12T | DHX29  | DEAH (Asp-Glu-Ala-His) box polypeptide 29               | CCDS34158.1  | chr5_54603295-54603295_G_A   | 36A>V   | Substitution | Nonsynonymous coding | 28% |
| MM12T | DHX30  | DEAH (Asp-Glu-Ala-His) box polypeptide 30               | CCDS2759.1   | chr3_47859514-47859514_C_T   | 11R>W   | Substitution | Nonsynonymous coding | 26% |
| MM12T | DHX30  | DEAH (Asp-Glu-Ala-His) box polypeptide 30               | CCDS2759.1   | chr3_47890503-47890503_C_T   | 955R>C  | Substitution | Nonsynonymous coding | 32% |
| MM12T | DHX34  | DEAH (Asp-Glu-Ala-His) box polypeptide 34               | CCDS12700.1  | chr19_47856393-47856393_C_T  | 36R>C   | Substitution | Nonsynonymous coding | 29% |
| MM12T | DHX36  | DEAH (Asp-Glu-Ala-His) box polypeptide 36               | CCDS3171.1   | chr3_154006687-154006687_C_A | 667V>L  | Substitution | Nonsynonymous coding | 38% |
| MM12T | DHX38  | DEAH (Asp-Glu-Ala-His) box polypeptide 38               | CCDS10907.1  | chr16_72131671-72131671_C_T  | 203R>X  | Substitution | Nonsense             | 10% |
| MM12T | DHX40  | DEAH (Asp-Glu-Ala-His) box polypeptide 40               | CCDS11617.1  | chr17_57663597-57663600_AAA_ | NA      | Deletion     | Splice site donor    | 14% |
| MM12T | DHX40  | DEAH (Asp-Glu-Ala-His) box polypeptide 40               | CCDS11617.1  | chr17_57663597-57663599_AA_  | NA      | Deletion     | Splice site donor    | 31% |
| MM12T | DHX57  | DEAH (Asp-Glu-Ala-Asp/His) box polypeptide 57           | CCDS1800.1   | chr2_39050139-39050139_G_A   | 1096P>L | Substitution | Nonsynonymous coding | 11% |
| MM12T | DHX57  | DEAH (Asp-Glu-Ala-Asp/His) box polypeptide 57           | CCDS1800.1   | chr2_39065023-39065023_A_G   | 831I>T  | Substitution | Nonsynonymous coding | 24% |
| MM12T | DHX8   | DEAH (Asp-Glu-Ala-His) box polypeptide 8                | CCDS11464.1  | chr17_41571096-41571096_C_T  | 352R>X  | Substitution | Nonsense             | 13% |
| MM12T | DIAPH3 | diaphanous homolog 3 (Drosophila)                       | CCDS41898.1  | chr13_60348873-60348873_G_A  | 1083P>L | Substitution | Nonsynonymous coding | 30% |
| MM12T | DIAPH3 | diaphanous homolog 3 (Drosophila)                       | CCDS41898.1  | chr13_60566229-60566229_C_T  | 406R>H  | Substitution | Nonsynonymous coding | 28% |
| MM12T | DICER1 | dicer 1, ribonuclease type III                          | CCDS9931.1   | chr14_95570243-95570243_G_A  | 1164L>F | Substitution | Nonsynonymous coding | 30% |
| MM12T | DICER1 | dicer 1, ribonuclease type III                          | CCDS9931.1   | chr14_95572409-95572409_G_A  | 986P>S  | Substitution | Nonsynonymous coding | 10% |
| MM12T | DIP2A  | DIP2 disco-interacting protein 2 homolog A (Drosophila) | CCDS46655.1  | chr21_47918542-47918542_C_T  | 151R>X  | Substitution | Nonsense             | 29% |
| MM12T | DIP2B  | DIP2 disco-interacting protein 2 homolog B (Drosophila) | CCDS31799.1  | chr12_51122442-51122442_G_A  | 1208A>T | Substitution | Nonsynonymous coding | 26% |
| MM12T | DIP2C  | DIP2 disco-interacting protein 2 homolog C (Drosophila) | CCDS7054.1   | chr10_412344-412344_C_T      | 713M>I  | Substitution | Nonsynonymous coding | 32% |
| MM12T | DIP2C  | DIP2 disco-interacting protein 2 homolog C (Drosophila) | CCDS7054.1   | chr10_518493-518493_G_A      | ISV-4>  | Substitution | Splice site acceptor | 12% |
| MM12T | DIRAS1 | DIRAS family, GTP-binding RAS-like 1                    | CCDS12092.1  | chr19_2717474-2717474_C_T    | 111V>M  | Substitution | Nonsynonymous coding | 36% |
| MM12T | DISC1  | disrupted in schizophrenia 1                            | CCDS31055.1  | chr1_231906668-231906668_C_T | 496Q>X  | Substitution | Nonsense             | 25% |

|       |                |                                                                                        |                 |                               |         |              |                      |     |
|-------|----------------|----------------------------------------------------------------------------------------|-----------------|-------------------------------|---------|--------------|----------------------|-----|
| MM12T | DISP2          | dispatched homolog 2 (Drosophila)                                                      | CCDS10056.1     | chr15_40657910-40657910_G_A   | 310R>H  | Substitution | Nonsynonymous coding | 13% |
| MM12T | DIXDC1         | DIX domain containing 1                                                                | ENST00000440460 | chr11_111866266-111866266_C_T | 555T>M  | Substitution | Nonsynonymous coding | 29% |
| MM12T | DKFZP686J19100 | Polycystic kidney disease protein 1-like 2<br>[Source:UniProtKB/Swiss-Prot;Acc:Q7Z442] | NM_052892       | chr16_81197214-81197214_C_A   | 1156E>D | Substitution | Nonsynonymous coding | 27% |
| MM12T | DLEC1          | deleted in lung and esophageal cancer 1                                                | NM_007337       | chr3_38163974-38163974_C_A    | 1739L>I | Substitution | Nonsynonymous coding | 27% |
| MM12T | DLEU7          | deleted in lymphocytic leukemia, 7                                                     | NM_198989       | chr13_51417662-51417662_G_A   | 41R>W   | Substitution | Nonsynonymous coding | 27% |
| MM12T | DLG5           | discs, large homolog 5 (Drosophila)                                                    | CCDS7353.2      | chr10_79571809-79571809_C_T   | 1399G>S | Substitution | Nonsynonymous coding | 26% |
| MM12T | DLST           | dihydrolipoamide S-succinyltransferase (E2<br>component of 2-oxo-glutarate complex)    | CCDS9833.1      | chr14_75360125-75360125_C_T   | 224R>W  | Substitution | Nonsynonymous coding | 29% |
| MM12T | DLX3           | distal-less homeobox 3                                                                 | CCDS11556.1     | chr17_48069105-48069105_C_T   | 214A>T  | Substitution | Nonsynonymous coding | 19% |
| MM12T | DMBT1          | deleted in malignant brain tumors 1                                                    | CCDS44490.1     | chr10_124396826-124396826_C_T | 2185Q>X | Substitution | Nonsense             | 15% |
| MM12T | DMD            | dystrophin                                                                             | ENST00000378682 | chrX_31132811-31132813_GGT_   | NA      | Deletion     | In-frame deletion    | 25% |
| MM12T | DMD            | dystrophin                                                                             | ENST00000378682 | chrX_31132810-31132813_GGGT_  | NA      | Deletion     | Frameshift           | 29% |
| MM12T | DMD            | dystrophin                                                                             | CCDS14233.1     | chrX_31191720-31191720_G_A    | 3422P>S | Substitution | Nonsynonymous coding | 30% |
| MM12T | DMD            | dystrophin                                                                             | CCDS14233.1     | chrX_32404497-32404497_G_A    | 1535T>M | Substitution | Nonsynonymous coding | 31% |
| MM12T | DMGDH          | dimethylglycine dehydrogenase                                                          | CCDS4044.1      | chr5_78340250-78340250_G_T    | 291L>I  | Substitution | Nonsynonymous coding | 26% |
| MM12T | DMPK           | dystrophia myotonica-protein kinase                                                    | CCDS46119.1     | chr19_46274309-46274309_G_A   | 563P>S  | Substitution | Nonsynonymous coding | 23% |
| MM12T | DMRTA2         | DMRT-like family A2                                                                    | CCDS44141.1     | chr1_50885295-50885295_G_A    | 224S>L  | Substitution | Nonsynonymous coding | 10% |
| MM12T | DMTF1          | cyclin D binding myb-like transcription factor 1                                       | CCDS5601.1      | chr7_86824066-86824066_G_A    | 699V>I  | Substitution | Nonsynonymous coding | 32% |
| MM12T | DMXL1          | Dmx-like 1                                                                             | CCDS4125.1      | chr5_118513772-118513772_T_A  | 2323L>H | Substitution | Nonsynonymous coding | 40% |
| MM12T | DMXL2          | Dmx-like 2                                                                             | CCDS10141.1     | chr15_51742457-51742457_C_T   | 2924V>I | Substitution | Nonsynonymous coding | 29% |
| MM12T | DMXL2          | Dmx-like 2                                                                             | CCDS10141.1     | chr15_51791855-51791855_G_A   | 1189A>V | Substitution | Nonsynonymous coding | 26% |
| MM12T | DMXL2          | Dmx-like 2                                                                             | CCDS10141.1     | chr15_51792203-51792203_G_A   | 1073A>V | Substitution | Nonsynonymous coding | 16% |
| MM12T | DMXL2          | Dmx-like 2                                                                             | CCDS10141.1     | chr15_51829921-51829921_C_A   | 461G>X  | Substitution | Nonsense             | 32% |
| MM12T | DNA2           | DNA replication helicase 2 homolog (yeast)                                             | CCDS44415.1     | chr10_70204814-70204814_C_T   | 448A>T  | Substitution | Nonsynonymous coding | 36% |
| MM12T | DNAAF3         | dynein, axonemal, assembly factor 3                                                    | CCDS12918.2     | chr19_55677965-55677965_A_G   | 18C>R   | Substitution | Nonsynonymous coding | 30% |
| MM12T | DNAH1          | dynein, axonemal, heavy chain 1                                                        | CCDS46842.1     | chr3_52404002-52404002_G_T    | 2035E>D | Substitution | Nonsynonymous coding | 39% |
| MM12T | DNAH1          | dynein, axonemal, heavy chain 1                                                        | CCDS46842.1     | chr3_52425019-52425019_G_A    | 3230W>X | Substitution | Nonsense             | 21% |
| MM12T | DNAH1          | dynein, axonemal, heavy chain 1                                                        | CCDS46842.1     | chr3_52434358-52434358_G_T    | 4232G>X | Substitution | Nonsense             | 14% |
| MM12T | DNAH10         | dynein, axonemal, heavy chain 10                                                       | CCDS9255.2      | chr12_124285848-124285848_G_A | 710R>H  | Substitution | Nonsynonymous coding | 11% |
| MM12T | DNAH10         | dynein, axonemal, heavy chain 10                                                       | CCDS9255.2      | chr12_124414986-124414986_G_A | 4099R>H | Substitution | Nonsynonymous coding | 38% |
| MM12T | DNAH11         | dynein, axonemal, heavy chain 11                                                       | ENST00000328843 | chr7_21639510-21639510_C_T    | 925H>Y  | Substitution | Nonsynonymous coding | 30% |
| MM12T | DNAH11         | dynein, axonemal, heavy chain 11                                                       | ENST00000328843 | chr7_21646120-21646120_C_T    | 1242A>V | Substitution | Nonsynonymous coding | 19% |
| MM12T | DNAH11         | dynein, axonemal, heavy chain 11                                                       | ENST00000328843 | chr7_21788212-21788212_G_A    | 2849R>Q | Substitution | Nonsynonymous coding | 29% |

|       |         |                                              |                 |                              |         |              |                      |     |
|-------|---------|----------------------------------------------|-----------------|------------------------------|---------|--------------|----------------------|-----|
| MM12T | DNAH11  | dynein, axonemal, heavy chain 11             | ENST00000328843 | chr7_21904268-21904268_C_A   | 3837A>D | Substitution | Nonsynonymous coding | 12% |
| MM12T | DNAH11  | dynein, axonemal, heavy chain 11             | ENST00000328843 | chr7_21938973-21938973_C_T   | 4364R>X | Substitution | Nonsense             | 13% |
| MM12T | DNAH17  | dynein, axonemal, heavy chain 17             | NM_173628       | chr17_76475573-76475573_C_T  | 2632A>T | Substitution | Nonsynonymous coding | 15% |
| MM12T | DNAH17  | dynein, axonemal, heavy chain 17             | NM_173628       | chr17_76487605-76487605_C_T  | 2197G>S | Substitution | Nonsynonymous coding | 29% |
| MM12T | DNAH17  | dynein, axonemal, heavy chain 17             | NM_173628       | chr17_76501520-76501520_C_T  | 1604R>H | Substitution | Nonsynonymous coding | 16% |
| MM12T | DNAH17  | dynein, axonemal, heavy chain 17             | NM_173628       | chr17_76521225-76521225_C_T  | 1244A>T | Substitution | Nonsynonymous coding | 12% |
| MM12T | DNAH2   | dynein, axonemal, heavy chain 2              | CCDS32551.1     | chr17_7643075-7643075_G_A    | 399A>T  | Substitution | Nonsynonymous coding | 11% |
| MM12T | DNAH2   | dynein, axonemal, heavy chain 2              | CCDS32551.1     | chr17_7681423-7681423_C_T    | 1759T>I | Substitution | Nonsynonymous coding | 31% |
| MM12T | DNAH2   | dynein, axonemal, heavy chain 2              | CCDS32551.1     | chr17_7727166-7727166_G_A    | 3782A>T | Substitution | Nonsynonymous coding | 27% |
| MM12T | DNAH2   | dynein, axonemal, heavy chain 2              | CCDS32551.1     | chr17_7734465-7734465_T_C    | 4098Y>H | Substitution | Nonsynonymous coding | 19% |
| MM12T | DNAH3   | dynein, axonemal, heavy chain 3              | CCDS10594.1     | chr16_21011834-21011834_C_A  | 2045E>X | Substitution | Nonsense             | 33% |
| MM12T | DNAH5   | dynein, axonemal, heavy chain 5              | CCDS3882.1      | chr5_13762979-13762979_A_G   | 3378V>A | Substitution | Nonsynonymous coding | 42% |
| MM12T | DNAH5   | dynein, axonemal, heavy chain 5              | CCDS3882.1      | chr5_13901422-13901422_T_C   | 664N>S  | Substitution | Nonsynonymous coding | 36% |
| MM12T | DNAH5   | dynein, axonemal, heavy chain 5              | CCDS3882.1      | chr5_13919404-13919404_C_T   | 286E>K  | Substitution | Nonsynonymous coding | 18% |
| MM12T | DNAH6   | dynein, axonemal, heavy chain 6              | CCDS46348.1     | chr2_84777072-84777072_C_T   | 459A>V  | Substitution | Nonsynonymous coding | 24% |
| MM12T | DNAH6   | dynein, axonemal, heavy chain 6              | CCDS46348.1     | chr2_84852135-84852135_C_T   | 1488A>V | Substitution | Nonsynonymous coding | 20% |
| MM12T | DNAH6   | dynein, axonemal, heavy chain 6              | CCDS46348.1     | chr2_84934679-84934679_C_T   | 2963R>C | Substitution | Nonsynonymous coding | 18% |
| MM12T | DNAH6   | dynein, axonemal, heavy chain 6              | CCDS46348.1     | chr2_84913685-84913685_A_G   | ISV+4>  | Substitution | Splice site donor    | 27% |
| MM12T | DNAH6   | dynein, axonemal, heavy chain 6              | CCDS46348.1     | chr2_84804521-84804521_C_T   | 689R>X  | Substitution | Nonsense             | 15% |
| MM12T | DNAH7   | dynein, axonemal, heavy chain 7              | CCDS42794.1     | chr2_196837170-196837170_C_A | 618E>D  | Substitution | Nonsynonymous coding | 36% |
| MM12T | DNAH8   | dynein, axonemal, heavy chain 8              | CCDS4838.1      | chr6_38818110-38818110_C_G   | 1544C>W | Substitution | Nonsynonymous coding | 18% |
| MM12T | DNAH8   | dynein, axonemal, heavy chain 8              | CCDS4838.1      | chr6_38885870-38885870_C_G   | 3276A>G | Substitution | Nonsynonymous coding | 16% |
| MM12T | DNAH8   | dynein, axonemal, heavy chain 8              | CCDS4838.1      | chr6_38749029-38749029_G_T   | ISV-1>  | Substitution | Splice site acceptor | 23% |
| MM12T | DNAH8   | dynein, axonemal, heavy chain 8              | CCDS4838.1      | chr6_38723858-38723858_A_G   | ISV+3>  | Substitution | Splice site donor    | 16% |
| MM12T | DNAH9   | dynein, axonemal, heavy chain 9              | CCDS11160.1     | chr17_11583197-11583197_G_T  | 1159Q>H | Substitution | Nonsynonymous coding | 18% |
| MM12T | DNAH9   | dynein, axonemal, heavy chain 9              | CCDS11160.1     | chr17_11795157-11795157_C_T  | 3726R>W | Substitution | Nonsynonymous coding | 16% |
| MM12T | DNAJB12 | DnaJ (Hsp40) homolog, subfamily B, member 12 | CCDS7316.2      | chr10_74100910-74100910_G_A  | 193A>V  | Substitution | Nonsynonymous coding | 11% |
| MM12T | DNAJB13 | DnaJ (Hsp40) homolog, subfamily B, member 13 | CCDS8227.1      | chr11_73677186-73677186_C_A  | 166L>M  | Substitution | Nonsynonymous coding | 14% |
| MM12T | DNAJB8  | DnaJ (Hsp40) homolog, subfamily B, member 8  | CCDS3048.1      | chr3_128181482-128181482_C_T | 203G>R  | Substitution | Nonsynonymous coding | 29% |
| MM12T | DNAJC16 | DnaJ (Hsp40) homolog, subfamily C, member 16 | CCDS30606.1     | chr1_15890420-15890420_C_T   | ISV-4>  | Substitution | Splice site acceptor | 15% |
| MM12T | DNAJC2  | DnaJ (Hsp40) homolog, subfamily C, member 2  | CCDS43628.1     | chr7_102964064-102964064_C_G | 234E>Q  | Substitution | Nonsynonymous coding | 20% |
| MM12T | DNAJC21 | DnaJ (Hsp40) homolog, subfamily C, member 21 | CCDS3907.2      | chr5_34937654-34937654_G_A   | 221R>Q  | Substitution | Nonsynonymous coding | 16% |

|       |          |                                                  |                 |                               |         |              |                      |     |
|-------|----------|--------------------------------------------------|-----------------|-------------------------------|---------|--------------|----------------------|-----|
| MM12T | DNAJC5B  | Dnaj (Hsp40) homolog, subfamily C, member 5 beta | CCDS6183.1      | chr8_66988980-66988980_G_A    | 69A>T   | Substitution | Nonsynonymous coding | 15% |
| MM12T | DNASE1   | deoxyribonuclease I                              | CCDS10507.1     | chr16_3707065-3707065_G_A     | 168A>T  | Substitution | Nonsynonymous coding | 16% |
| MM12T | DNASE1L2 | deoxyribonuclease I-like 2                       | CCDS42105.1     | chr16_2287373-2287373_C_T     | ISV-4>  | Substitution | Splice site acceptor | 27% |
| MM12T | DNM1     | dynamins 1                                       | CCDS6895.1      | chr9_130981471-130981471_G_A  | 177A>T  | Substitution | Nonsynonymous coding | 18% |
| MM12T | DNM1L    | dynamins 1-like                                  | CCDS8729.1      | chr12_32854424-32854424_C_T   | 60R>W   | Substitution | Nonsynonymous coding | 26% |
| MM12T | DNM2     | dynamins 2                                       | CCDS45968.1     | chr19_10939878-10939878_G_T   | 742S>I  | Substitution | Nonsynonymous coding | 15% |
| MM12T | DNMT3A   | DNA (cytosine-5-)-methyltransferase 3 alpha      | CCDS33157.1     | chr2_25458591-25458591_C_T    | 861C>Y  | Substitution | Nonsynonymous coding | 23% |
| MM12T | DNMT3A   | DNA (cytosine-5-)-methyltransferase 3 alpha      | CCDS33157.1     | chr2_25469629-25469629_G_A    | 380A>V  | Substitution | Nonsynonymous coding | 12% |
| MM12T | DNMT3B   | DNA (cytosine-5-)-methyltransferase 3 beta       | CCDS13205.1     | chr20_31379479-31379479_G_A   | 296V>I  | Substitution | Nonsynonymous coding | 31% |
| MM12T | DNMT3B   | DNA (cytosine-5-)-methyltransferase 3 beta       | CCDS13205.1     | chr20_31383238-31383238_G_A   | 384A>T  | Substitution | Nonsynonymous coding | 12% |
| MM12T | DNMT3B   | DNA (cytosine-5-)-methyltransferase 3 beta       | CCDS13205.1     | chr20_31395599-31395599_G_A   | 818V>M  | Substitution | Nonsynonymous coding | 29% |
| MM12T | DNPEP    | aspartyl aminopeptidase                          | CCDS42823.1     | chr2_220246865-220246865_G_A  | ISV-4>  | Substitution | Splice site acceptor | 14% |
| MM12T | DNP1     | 2'-deoxynucleoside 5'-phosphate N-hydrolase 1    | CCDS4891.1      | chr6_43193610-43193610_G_A    | 129A>V  | Substitution | Nonsynonymous coding | 40% |
| MM12T | DOCK1    | dedicator of cytokinesis 1                       | NM_001380       | chr10_128796461-128796461_G_T | 239D>Y  | Substitution | Nonsynonymous coding | 28% |
| MM12T | DOCK1    | dedicator of cytokinesis 1                       | NM_001380       | chr10_129224184-129224184_C_T | 1587T>M | Substitution | Nonsynonymous coding | 22% |
| MM12T | DOCK1    | dedicator of cytokinesis 1                       | NM_001380       | chr10_129231622-129231622_C_T | 1643R>C | Substitution | Nonsynonymous coding | 29% |
| MM12T | DOCK10   | dedicator of cytokinesis 10                      | CCDS46528.1     | chr2_225907069-225907069_C_A  | 8R>M    | Substitution | Nonsynonymous coding | 27% |
| MM12T | DOCK11   | dedicator of cytokinesis 11                      | CCDS35373.1     | chrX_117815681-117815681_G_A  | 1963A>T | Substitution | Nonsynonymous coding | 28% |
| MM12T | DOCK2    | dedicator of cytokinesis 2                       | CCDS4371.1      | chr5_169507194-169507194_G_A  | 1732D>N | Substitution | Nonsynonymous coding | 28% |
| MM12T | DOCK3    | dedicator of cytokinesis 3                       | CCDS46835.1     | chr3_51400085-51400085_C_A    | 1758S>Y | Substitution | Nonsynonymous coding | 36% |
| MM12T | DOCK4    | dedicator of cytokinesis 4                       | CCDS47688.1     | chr7_111405269-111405269_C_A  | 1300A>S | Substitution | Nonsynonymous coding | 24% |
| MM12T | DOCK4    | dedicator of cytokinesis 4                       | CCDS47688.1     | chr7_111462476-111462476_A_C  | 958L>V  | Substitution | Nonsynonymous coding | 23% |
| MM12T | DOCK6    | dedicator of cytokinesis 6                       | CCDS45975.1     | chr19_11352859-11352859_G_A   | 502P>L  | Substitution | Nonsynonymous coding | 32% |
| MM12T | DOCK8    | dedicator of cytokinesis 8                       | CCDS6440.1      | chr9_340223-340223_G_A        | 459M>I  | Substitution | Nonsynonymous coding | 24% |
| MM12T | DOCK9    | dedicator of cytokinesis 9                       | CCDS45062.1     | chr13_99476756-99476756_C_T   | 1676V>M | Substitution | Nonsynonymous coding | 33% |
| MM12T | DOCK9    | dedicator of cytokinesis 9                       | CCDS45062.1     | chr13_99483762-99483762_C_T   | 1469G>E | Substitution | Nonsynonymous coding | 11% |
| MM12T | DOHH     | deoxyhypusine hydroxylase/monooxygenase          | CCDS12108.1     | chr19_3491802-3491802_G_T     | 199H>Q  | Substitution | Nonsynonymous coding | 11% |
| MM12T | DOHH     | deoxyhypusine hydroxylase/monooxygenase          | CCDS12108.1     | chr19_3496809-3496809_C_T     | 2V>M    | Substitution | Nonsynonymous coding | 30% |
| MM12T | DOK7     | docking protein 7                                | ENST00000389653 | chr4_3502427-3502427_G_A      | 568A>T  | Substitution | Nonsynonymous coding | 13% |
| MM12T | DOLK     | dolichol kinase                                  | CCDS6915.1      | chr9_131708138-131708138_G_A  | 482A>V  | Substitution | Nonsynonymous coding | 38% |
| MM12T | DOPEY2   | dopey family member 2                            | CCDS13643.1     | chr21_37603097-37603097_C_T   | 672A>V  | Substitution | Nonsynonymous coding | 31% |
| MM12T | DOPEY2   | dopey family member 2                            | CCDS13643.1     | chr21_37623584-37623584_T_C   | ISV+2>  | Substitution | Splice site donor    | 45% |

|       |         |                                                                 |                 |                               |         |              |                      |     |
|-------|---------|-----------------------------------------------------------------|-----------------|-------------------------------|---------|--------------|----------------------|-----|
| MM12T | DOT1L   | DOT1-like, histone H3 methyltransferase (S. cerevisiae)         | CCDS42460.1     | chr19_2210451-2210451_C_T     | 353A>V  | Substitution | Nonsynonymous coding | 26% |
| MM12T | DOT1L   | DOT1-like, histone H3 methyltransferase (S. cerevisiae)         | CCDS42460.1     | chr19_2226905-2226905_G_A     | 1462R>Q | Substitution | Nonsynonymous coding | 35% |
| MM12T | DPF2    | D4, zinc and double PHD fingers family 2                        | CCDS8100.1      | chr11_65113714-65113714_A_G   | ISV-4>  | Substitution | Splice site acceptor | 42% |
| MM12T | DPH2    | DPH2 homolog (S. cerevisiae)                                    | CCDS504.1       | chr1_44436744-44436744_G_A    | 123V>M  | Substitution | Nonsynonymous coding | 25% |
| MM12T | DPP10   | dipeptidyl-peptidase 10 (non-functional)                        | CCDS46400.1     | chr2_116101420-116101420_G_A  | 68R>K   | Substitution | Nonsynonymous coding | 30% |
| MM12T | DPP3    | dipeptidyl-peptidase 3                                          | CCDS8141.1      | chr11_66254795-66254795_G_T   | 185Q>H  | Substitution | Nonsynonymous coding | 34% |
| MM12T | DPP6    | dipeptidyl-peptidase 6                                          | ENST00000406326 | chr7_154379585-154379585_C_T  | 285P>S  | Substitution | Nonsynonymous coding | 20% |
| MM12T | DPP8    | dipeptidyl-peptidase 8                                          | CCDS10207.1     | chr15_65744385-65744385_G_A   | 792T>M  | Substitution | Nonsynonymous coding | 32% |
| MM12T | DPP9    | dipeptidyl-peptidase 9                                          | CCDS45928.1     | chr19_4704017-4704017_C_T     | 217R>Q  | Substitution | Nonsynonymous coding | 16% |
| MM12T | DPRX    | divergent-paired related homeobox                               | CCDS33103.1     | chr19_54140183-54140183_G_A   | 173A>T  | Substitution | Nonsynonymous coding | 37% |
| MM12T | DPT     | dermatopontin                                                   | CCDS1275.1      | chr1_168698178-168698178_G_A  | 79P>S   | Substitution | Nonsynonymous coding | 26% |
| MM12T | DPYD    | dihydropyrimidine dehydrogenase                                 | CCDS30777.1     | chr1_97544542-97544542_G_A    | 1023P>L | Substitution | Nonsynonymous coding | 26% |
| MM12T | DPYD    | dihydropyrimidine dehydrogenase                                 | CCDS30777.1     | chr1_97658735-97658735_G_A    | 838L>F  | Substitution | Nonsynonymous coding | 48% |
| MM12T | DPYS    | dihydropyrimidinase                                             | CCDS6302.1      | chr8_105441903-105441903_C_T  | 274A>T  | Substitution | Nonsynonymous coding | 14% |
| MM12T | DPYSL3  | dihydropyrimidinase-like 3                                      | CCDS43381.1     | chr5_146773647-146773647_C_T  | 555R>H  | Substitution | Nonsynonymous coding | 29% |
| MM12T | DQX1    | DEAQ box RNA-dependent ATPase 1                                 | CCDS1949.2      | chr2_74752178-74752178_C_A    | 130S>I  | Substitution | Nonsynonymous coding | 11% |
| MM12T | DRAXIN  | dorsal inhibitory axon guidance protein                         | CCDS135.1       | chr1_11766394-11766394_G_A    | 27A>T   | Substitution | Nonsynonymous coding | 30% |
| MM12T | DRAXIN  | dorsal inhibitory axon guidance protein                         | CCDS135.1       | chr1_11766448-11766448_C_T    | 45P>S   | Substitution | Nonsynonymous coding | 35% |
| MM12T | DROSHA  | drosha, ribonuclease type III                                   | CCDS47195.1     | chr5_31409179-31409179_C_A    | 1280D>Y | Substitution | Nonsynonymous coding | 14% |
| MM12T | DSC1    | desmocollin 1                                                   | CCDS11894.1     | chr18_28739496-28739496_A     | NA      | Insertion    | Splice site acceptor | 14% |
| MM12T | DSC3    | desmocollin 3                                                   | CCDS32810.1     | chr18_28588431-28588431_G_A   | 442P>S  | Substitution | Nonsynonymous coding | 12% |
| MM12T | DSCAM   | Down syndrome cell adhesion molecule                            | CCDS42929.1     | chr21_41414441-41414441_G_A   | 1848T>M | Substitution | Nonsynonymous coding | 30% |
| MM12T | DSCAM   | Down syndrome cell adhesion molecule                            | CCDS42929.1     | chr21_41561090-41561090_G_A   | 811A>V  | Substitution | Nonsynonymous coding | 27% |
| MM12T | DSCAML1 | Down syndrome cell adhesion molecule like 1                     | CCDS8384.1      | chr11_117389187-117389187_C_T | 562V>I  | Substitution | Nonsynonymous coding | 12% |
| MM12T | DSCAML1 | Down syndrome cell adhesion molecule like 1                     | CCDS8384.1      | chr11_117667953-117667953_T_A | 8R>W    | Substitution | Nonsynonymous coding | 28% |
| MM12T | DSE     | dermatan sulfate epimerase                                      | CCDS5107.1      | chr6_116754682-116754682_C_T  | 363R>C  | Substitution | Nonsynonymous coding | 12% |
| MM12T | DSPP    | dentin sialophosphoprotein                                      | CCDS43248.1     | chr4_88534319-88534319_G_T    | 327E>D  | Substitution | Nonsynonymous coding | 42% |
| MM12T | DTX3L   | deltex 3-like (Drosophila)                                      | CCDS3015.1      | chr3_122288300-122288300_T_C  | 455L>P  | Substitution | Nonsynonymous coding | 27% |
| MM12T | DUOX2   | dual oxidase 2                                                  | CCDS10117.1     | chr15_45405539-45405539_C_T   | 24G>D   | Substitution | Nonsynonymous coding | 47% |
| MM12T | DUS4L   | dihydrouridine synthase 4-like (S. cerevisiae)                  | CCDS5745.1      | chr7_107215721-107215721_G_A  | 149E>K  | Substitution | Nonsynonymous coding | 10% |
| MM12T | DUSP11  | dual specificity phosphatase 11 (RNA/RNP complex 1-interacting) | CCDS1928.2      | chr2_74005465-74005465_C_A    | 94G>V   | Substitution | Nonsynonymous coding | 16% |
| MM12T | DUSP12  | dual specificity phosphatase 12                                 | CCDS1234.1      | chr1_161719661-161719661_G_A  | 24A>T   | Substitution | Nonsynonymous coding | 39% |

|       |         |                                                         |             |                               |         |              |                      |     |
|-------|---------|---------------------------------------------------------|-------------|-------------------------------|---------|--------------|----------------------|-----|
| MM12T | DUSP15  | dual specificity phosphatase 15                         | CCDS13193.1 | chr20_30450475-30450475_G_A   | 112R>W  | Substitution | Nonsynonymous coding | 12% |
| MM12T | DUSP22  | dual specificity phosphatase 22                         | CCDS4468.1  | chr6_348790-348790_G_A        | 153E>K  | Substitution | Nonsynonymous coding | 15% |
| MM12T | DUSP22  | dual specificity phosphatase 22                         | CCDS4468.1  | chr6_348099-348099_G_A        | ISV-4>  | Substitution | Splice site acceptor | 13% |
| MM12T | DUSP22  | dual specificity phosphatase 22                         | CCDS4468.1  | chr6_345932-345932_C_T        | ISV+4>  | Substitution | Splice site donor    | 16% |
| MM12T | DUSP27  | dual specificity phosphatase 27 (putative)              | CCDS30932.1 | chr1_167082952-167082952_C_T  | 39S>L   | Substitution | Nonsynonymous coding | 19% |
| MM12T | DUSP27  | dual specificity phosphatase 27 (putative)              | CCDS30932.1 | chr1_167097384-167097384_C_T  | 1006R>W | Substitution | Nonsynonymous coding | 29% |
| MM12T | DUSP4   | dual specificity phosphatase 4                          | CCDS6072.1  | chr8_29194790-29194790_C_T    | 313R>H  | Substitution | Nonsynonymous coding | 11% |
| MM12T | DUSP8   | dual specificity phosphatase 8                          | CCDS7724.1  | chr11_1580277-1580277_C_T     | 127A>T  | Substitution | Nonsynonymous coding | 15% |
| MM12T | DYM     | dymeclin                                                | CCDS11937.1 | chr18_46812951-46812951_C_T   | 267G>S  | Substitution | Nonsynonymous coding | 40% |
| MM12T | DYNC1H1 | dynein, cytoplasmic 1, heavy chain 1                    | CCDS9966.1  | chr14_102449797-102449797_G_A | 438V>I  | Substitution | Nonsynonymous coding | 12% |
| MM12T | DYNC1H1 | dynein, cytoplasmic 1, heavy chain 1                    | CCDS9966.1  | chr14_102471170-102471170_G_T | 1707K>N | Substitution | Nonsynonymous coding | 28% |
| MM12T | DYNC1H1 | dynein, cytoplasmic 1, heavy chain 1                    | CCDS9966.1  | chr14_102496216-102496216_G_A | 3235A>T | Substitution | Nonsynonymous coding | 28% |
| MM12T | DYNC1H1 | dynein, cytoplasmic 1, heavy chain 1                    | CCDS9966.1  | chr14_102505353-102505353_G_A | 3741R>H | Substitution | Nonsynonymous coding | 11% |
| MM12T | DYNC1H1 | dynein, cytoplasmic 1, heavy chain 1                    | CCDS9966.1  | chr14_102478454-102478454_C_T | ISV+4>  | Substitution | Splice site donor    | 14% |
| MM12T | DYNLL2  | dynein, light chain, LC8-type 2                         | CCDS11601.1 | chr17_56164482-56164482_G_A   | 11A>T   | Substitution | Nonsynonymous coding | 11% |
| MM12T | DZANK1  | double zinc ribbon and ankyrin repeat domains<br>1      | CCDS46582.1 | chr20_18395083-18395083_C_T   | 384G>D  | Substitution | Nonsynonymous coding | 13% |
| MM12T | DZIP1   | DAZ interacting protein 1                               | CCDS9478.1  | chr13_96285515-96285515_G_T   | 220R>S  | Substitution | Nonsynonymous coding | 32% |
| MM12T | E2F5    | E2F transcription factor 5, p130-binding                | CCDS47885.1 | chr8_86114484-86114484_C_A    | 113Q>K  | Substitution | Nonsynonymous coding | 16% |
| MM12T | E4F1    | E4F transcription factor 1                              | CCDS32370.1 | chr16_2284376-2284376_G_A     | 527R>H  | Substitution | Nonsynonymous coding | 23% |
| MM12T | EBF3    | early B-cell factor 3                                   | CCDS31314.1 | chr10_131757270-131757270_G_A | 138A>V  | Substitution | Nonsynonymous coding | 31% |
| MM12T | ECD     | ecdysoneless homolog (Drosophila)                       | CCDS44434.1 | chr10_74906123-74906123__A    | NA      | Insertion    | Splice site acceptor | 16% |
| MM12T | ECEL1   | endothelin converting enzyme-like 1                     | CCDS2493.1  | chr2_233349303-233349303_G_A  | 355R>W  | Substitution | Nonsynonymous coding | 17% |
| MM12T | ECHDC2  | enoyl CoA hydratase domain containing 2                 | CCDS571.1   | chr1_53364881-53364881_G_A    | 209R>W  | Substitution | Nonsynonymous coding | 36% |
| MM12T | EDA     | ectodysplasin A                                         | CCDS14394.1 | chrX_69253319-69253319_C_T    | 289R>C  | Substitution | Nonsynonymous coding | 31% |
| MM12T | EDC3    | enhancer of mRNA decapping 3 homolog (S.<br>cerevisiae) | CCDS10267.1 | chr15_74932913-74932913_G_T   | 290L>M  | Substitution | Nonsynonymous coding | 31% |
| MM12T | EDC4    | enhancer of mRNA decapping 4                            | CCDS10849.1 | chr16_67915241-67915241_C_A   | 904L>M  | Substitution | Nonsynonymous coding | 28% |
| MM12T | EDEM2   | ER degradation enhancer, mannosidase alpha-<br>like 2   | CCDS13247.1 | chr20_33734720-33734720_C_A   | 42M>I   | Substitution | Nonsynonymous coding | 12% |
| MM12T | EEA1    | early endosome antigen 1                                | CCDS31874.1 | chr12_93206833-93206833_C_T   | 656A>T  | Substitution | Nonsynonymous coding | 13% |
| MM12T | EED     | embryonic ectoderm development                          | CCDS8273.1  | chr11_85963275-85963275_G_A   | 118S>N  | Substitution | Nonsynonymous coding | 12% |
| MM12T | EEF2    | eukaryotic translation elongation factor 2              | CCDS12117.1 | chr19_3977334-3977334_C_A     | 754Q>H  | Substitution | Nonsynonymous coding | 32% |
| MM12T | EFCAB13 | EF-hand calcium binding domain 13                       | CCDS11512.1 | chr17_45456584-45456584_C_T   | 516A>V  | Substitution | Nonsynonymous coding | 35% |
| MM12T | EFCAB4A | EF-hand calcium binding domain 4A                       | CCDS41588.1 | chr11_829356-829356_G_A       | ISV-4>  | Substitution | Splice site acceptor | 25% |

|       |         |                                                                       |                 |                               |         |              |                      |     |
|-------|---------|-----------------------------------------------------------------------|-----------------|-------------------------------|---------|--------------|----------------------|-----|
| MM12T | EFCAB4B | EF-hand calcium binding domain 4B                                     | CCDS44803.1     | chr12_3757704-3757704_G_A     | ISV>4>  | Substitution | Splice site donor    | 32% |
| MM12T | EFCAB6  | EF-hand calcium binding domain 6                                      | CCDS14049.1     | chr22_43926760-43926760_G_A   | 1440R>W | Substitution | Nonsynonymous coding | 17% |
| MM12T | EFHB    | EF-hand domain family, member B                                       | CCDS33715.2     | chr3_19975387-19975387_G_A    | 42R>X   | Substitution | Nonsense             | 26% |
| MM12T | EFHC1   | EF-hand domain (C-terminal) containing 1                              | CCDS4942.1      | chr6_52303292-52303292_G_A    | 159R>Q  | Substitution | Nonsynonymous coding | 19% |
| MM12T | EFTUD1  | elongation factor Tu GTP binding domain containing 1                  | CCDS42071.1     | chr15_82456236-82456236_C_T   | 614A>T  | Substitution | Nonsynonymous coding | 24% |
| MM12T | EFTUD1  | elongation factor Tu GTP binding domain containing 1                  | CCDS42071.1     | chr15_82519875-82519875_T_C   | 370T>A  | Substitution | Nonsynonymous coding | 21% |
| MM12T | EGF     | epidermal growth factor                                               | CCDS3689.1      | chr4_110834498-110834498_C_T  | 3L>F    | Substitution | Nonsynonymous coding | 39% |
| MM12T | EGF     | epidermal growth factor                                               | CCDS3689.1      | chr4_110932474-110932474_C_T  | 1163R>X | Substitution | Nonsense             | 11% |
| MM12T | EGFL8   | EGF-like-domain, multiple 8                                           | CCDS4743.1      | chr6_32135717-32135717_G_A    | 289G>D  | Substitution | Nonsynonymous coding | 11% |
| MM12T | EGFLAM  | EGF-like, fibronectin type III and laminin G domains                  | CCDS3924.1      | chr5_38427153-38427153_C_T    | 618S>F  | Substitution | Nonsynonymous coding | 31% |
| MM12T | EGR2    | early growth response 2                                               | CCDS7267.1      | chr10_64573446-64573446_G_A   | 318R>W  | Substitution | Nonsynonymous coding | 32% |
| MM12T | EGR4    | early growth response 4                                               | NM_001965       | chr2_73518709-73518709_C_T    | 549R>H  | Substitution | Nonsynonymous coding | 33% |
| MM12T | EGR4    | early growth response 4                                               | NM_001965       | chr2_73519576-73519576_G_A    | 260A>V  | Substitution | Nonsynonymous coding | 29% |
| MM12T | EHBP1L1 | EH domain binding protein 1-like 1                                    | CCDS44649.1     | chr11_65350045-65350045_G_T   | 634Q>H  | Substitution | Nonsynonymous coding | 33% |
| MM12T | EHD2    | EH-domain containing 2                                                | CCDS12704.1     | chr19_48219991-48219991_G_A   | 41R>H   | Substitution | Nonsynonymous coding | 38% |
| MM12T | EHD3    | EH-domain containing 3                                                | CCDS1774.1      | chr2_31489054-31489054_G_T    | 364Q>H  | Substitution | Nonsynonymous coding | 31% |
| MM12T | EHMT1   | euchromatic histone-lysine N-methyltransferase 1                      | NM_024757       | chr9_140648636-140648636_G_T  | 421S>I  | Substitution | Nonsynonymous coding | 25% |
| MM12T | EHMT1   | euchromatic histone-lysine N-methyltransferase 1                      | NM_024757       | chr9_140707606-140707606_G_A  | 1006V>M | Substitution | Nonsynonymous coding | 45% |
| MM12T | EIF1    | eukaryotic translation initiation factor 1                            | CCDS11403.1     | chr17_39846413-39846413_G_A   | 90R>H   | Substitution | Nonsynonymous coding | 17% |
| MM12T | EIF2B5  | eukaryotic translation initiation factor 2B, subunit 5 epsilon, 82kDa | CCDS3252.1      | chr3_183858233-183858233_G_A  | 291V>I  | Substitution | Nonsynonymous coding | 31% |
| MM12T | EIF2B5  | eukaryotic translation initiation factor 2B, subunit 5 epsilon, 82kDa | CCDS3252.1      | chr3_183861235-183861235_C_T  | 584A>V  | Substitution | Nonsynonymous coding | 12% |
| MM12T | EIF2S1  | eukaryotic translation initiation factor 2, subunit 1 alpha, 35kDa    | CCDS9781.1      | chr14_67849201-67849201_C_T   | 239T>M  | Substitution | Nonsynonymous coding | 12% |
| MM12T | EIF3A   | eukaryotic translation initiation factor 3, subunit A                 | CCDS7608.1      | chr10_120795600-120795600_C_T | 1367R>H | Substitution | Nonsynonymous coding | 18% |
| MM12T | EIF3G   | eukaryotic translation initiation factor 3, subunit G                 | CCDS12227.1     | chr19_10229396-10229396_C_T   | 83R>H   | Substitution | Nonsynonymous coding | 29% |
| MM12T | EIF3G   | eukaryotic translation initiation factor 3, subunit G                 | CCDS12227.1     | chr19_10227865-10227865_C_A   | ISV-1>  | Substitution | Splice site acceptor | 14% |
| MM12T | EIF4E1B | eukaryotic translation initiation factor 4E family member 1B          | CCDS47345.1     | chr5_176072494-176072494_C_A  | 197N>K  | Substitution | Nonsynonymous coding | 30% |
| MM12T | EIF4G1  | eukaryotic translation initiation factor 4 gamma, 1                   | CCDS3259.1      | chr3_184039259-184039259_C_A  | 296S>Y  | Substitution | Nonsynonymous coding | 35% |
| MM12T | EIF4G1  | eukaryotic translation initiation factor 4 gamma, 1                   | CCDS3259.1      | chr3_184039307-184039307_G_A  | 312R>H  | Substitution | Nonsynonymous coding | 17% |
| MM12T | EIF4G1  | eukaryotic translation initiation factor 4 gamma, 1                   | CCDS3259.1      | chr3_184039660-184039660_G_T  | 430A>S  | Substitution | Nonsynonymous coding | 29% |
| MM12T | EIF4G2  | eukaryotic translation initiation factor 4 gamma, 2                   | ENST00000429377 | chr11_10826471-10826471_C_T   | 187V>I  | Substitution | Nonsynonymous coding | 18% |
| MM12T | EIF4G3  | eukaryotic translation initiation factor 4 gamma, 3                   | CCDS214.1       | chr1_21191610-21191610_G_A    | 867A>V  | Substitution | Nonsynonymous coding | 10% |
| MM12T | EIF5B   | eukaryotic translation initiation factor 5B                           | CCDS42721.1     | chr2_99977939-99977939_A_G    | 192E>G  | Substitution | Nonsynonymous coding | 43% |

|       |                 |                                                                                |                 |                               |        |              |                      |     |
|-------|-----------------|--------------------------------------------------------------------------------|-----------------|-------------------------------|--------|--------------|----------------------|-----|
| MM12T | ELFN1           | extracellular leucine-rich repeat and fibronectin type III domain containing 1 | NM_001128636    | chr7_1784905-1784905_G_A      | 225V>I | Substitution | Nonsynonymous coding | 31% |
| MM12T | ELFN1           | extracellular leucine-rich repeat and fibronectin type III domain containing 1 | NM_001128636    | chr7_1785023-1785023_G_A      | 264R>H | Substitution | Nonsynonymous coding | 28% |
| MM12T | ELFN1           | extracellular leucine-rich repeat and fibronectin type III domain containing 1 | NM_001128636    | chr7_1786672-1786672_G_A      | 814D>N | Substitution | Nonsynonymous coding | 28% |
| MM12T | ELFN2           | extracellular leucine-rich repeat and fibronectin type III domain containing 2 | CCDS33642.1     | chr22_37770317-37770317_G_A   | 420R>C | Substitution | Nonsynonymous coding | 19% |
| MM12T | ELL             | elongation factor RNA polymerase II                                            | CCDS12380.1     | chr19_18561307-18561307_C_T   | 482G>E | Substitution | Nonsynonymous coding | 12% |
| MM12T | ELMO3           | engulfment and cell motility 3                                                 | CCDS10833.2     | chr16_67233457-67233457_C_T   | 80A>V  | Substitution | Nonsynonymous coding | 22% |
| MM12T | ELMO3           | engulfment and cell motility 3                                                 | CCDS10833.2     | chr16_67236847-67236847_C_T   | 592R>C | Substitution | Nonsynonymous coding | 32% |
| MM12T | ELMSAN1         | ELM2 and Myb/SANT-like domain containing 1                                     | CCDS9819.1      | chr14_74205678-74205678_C_T   | 345R>H | Substitution | Nonsynonymous coding | 11% |
| MM12T | ELN             | elastin                                                                        | ENST00000358929 | chr7_73474852-73474852_C_T    | 625R>W | Substitution | Nonsynonymous coding | 37% |
| MM12T | ELP2            | elongator acetyltransferase complex subunit 2                                  | CCDS11918.1     | chr18_33740902-33740902_C_T   | 566H>Y | Substitution | Nonsynonymous coding | 27% |
| MM12T | EME1            | essential meiotic endonuclease 1 homolog 1 (S. pombe)                          | CCDS11565.1     | chr17_48456864-48456864_A_G   | 428S>G | Substitution | Nonsynonymous coding | 28% |
| MM12T | EMILIN1         | elastin microfibril interfacier 1                                              | CCDS1733.1      | chr2_27305025-27305025_C_T    | 196R>W | Substitution | Nonsynonymous coding | 34% |
| MM12T | EMILIN1         | elastin microfibril interfacier 1                                              | CCDS1733.1      | chr2_27305731-27305731_C_T    | 431A>V | Substitution | Nonsynonymous coding | 26% |
| MM12T | EMILIN3         | elastin microfibril interfacier 3                                              | CCDS13316.1     | chr20_39990977-39990977_C_T   | 411G>D | Substitution | Nonsynonymous coding | 32% |
| MM12T | EML5            | echinoderm microtubule associated protein like 5                               | CCDS45148.1     | chr14_89171833-89171833_C_T   | 642R>H | Substitution | Nonsynonymous coding | 16% |
| MM12T | EML5            | echinoderm microtubule associated protein like 5                               | CCDS45148.1     | chr14_89202849-89202849_C_T   | 303S>N | Substitution | Nonsynonymous coding | 28% |
| MM12T | EML6            | echinoderm microtubule associated protein like 6                               | CCDS46286.1     | chr2_55106696-55106696_G_A    | 786C>Y | Substitution | Nonsynonymous coding | 22% |
| MM12T | EMP1            | epithelial membrane protein 1                                                  | CCDS8660.1      | chr12_13366647-13366647_C_A   | 70L>I  | Substitution | Nonsynonymous coding | 14% |
| MM12T | EMR1            | egf-like module containing, mucin-like, hormone receptor-like 1                | CCDS12175.1     | chr19_6906515-6906515_G_A     | 341A>T | Substitution | Nonsynonymous coding | 33% |
| MM12T | EMR2            | egf-like module containing, mucin-like, hormone receptor-like 2                | CCDS32935.1     | chr19_14884819-14884819_C_T   | 44A>T  | Substitution | Nonsynonymous coding | 38% |
| MM12T | ENO3            | enolase 3 (beta, muscle)                                                       | CCDS11062.1     | chr17_4860156-4860156_C_T     | 403R>C | Substitution | Nonsynonymous coding | 25% |
| MM12T | ENO4            | enolase family member 4                                                        | ENST00000341276 | chr10_118633618-118633618_C_T | 419T>I | Substitution | Nonsynonymous coding | 27% |
| MM12T | ENPP2           | ectonucleotide pyrophosphatase/phosphodiesterase 2                             | CCDS6329.1      | chr8_120596231-120596231_C_T  | 528G>R | Substitution | Nonsynonymous coding | 10% |
| MM12T | ENPP3           | ectonucleotide pyrophosphatase/phosphodiesterase 3                             | CCDS5148.1      | chr6_132006596-132006596_C_T  | 405R>C | Substitution | Nonsynonymous coding | 40% |
| MM12T | ENSG00000005189 | -                                                                              | CCDS10591.1     | chr16_20857622-20857622_C_T   | 735P>L | Substitution | Nonsynonymous coding | 29% |
| MM12T | ENSG00000105520 | -                                                                              | CCDS12258.1     | chr19_11473201-11473201_C_A   | 226L>I | Substitution | Nonsynonymous coding | 26% |
| MM12T | ENSG00000105663 | -                                                                              | CCDS46055.1     | chr19_36212263-36212263_G_A   | 672G>R | Substitution | Nonsynonymous coding | 35% |
| MM12T | ENSG00000105663 | -                                                                              | CCDS46055.1     | chr19_36213366-36213366_C_T   | 855R>W | Substitution | Nonsynonymous coding | 32% |
| MM12T | ENSG00000129951 | -                                                                              | CCDS12043.1     | chr19_812877-812877_C_T       | 645G>D | Substitution | Nonsynonymous coding | 47% |
| MM12T | ENSG00000129951 | -                                                                              | CCDS12043.1     | chr19_812889-812889_G_A       | 641A>V | Substitution | Nonsynonymous coding | 47% |
| MM12T | ENSG00000129951 | -                                                                              | CCDS12043.1     | chr19_812910-812910_G_A       | 634A>V | Substitution | Nonsynonymous coding | 11% |
| MM12T | ENSG00000143674 | -                                                                              | CCDS1598.1      | chr1_233497907-233497907_G_A  | 474V>M | Substitution | Nonsynonymous coding | 18% |



|       |                 |                                                             |                 |                               |         |              |                      |     |
|-------|-----------------|-------------------------------------------------------------|-----------------|-------------------------------|---------|--------------|----------------------|-----|
| MM12T | ENSG00000163526 | -                                                           | ENST00000413793 | chr2_220136156-220136156_G_A  | 179C>Y  | Substitution | Nonsynonymous coding | 14% |
| MM12T | ENSG00000172901 | -                                                           | CCDS4124.1      | chr5_115298438-115298438_C_T  | 42R>C   | Substitution | Nonsynonymous coding | 13% |
| MM12T | ENSG00000173517 | -                                                           | CCDS42062.1     | chr15_77472837-77472837_C_T   | 478V>M  | Substitution | Nonsynonymous coding | 21% |
| MM12T | ENSG00000175901 | -                                                           | ENST00000321795 | chr17_79005001-79005001_G_A   | 91A>V   | Substitution | Nonsynonymous coding | 11% |
| MM12T | ENSG00000196624 | -                                                           | ENST00000457893 | chr6_36690394-36690394_C_T    | 531A>V  | Substitution | Nonsynonymous coding | 10% |
| MM12T | ENSG00000196624 | -                                                           | ENST00000457893 | chr6_36699781-36699781_T_G    | 696S>A  | Substitution | Nonsynonymous coding | 28% |
| MM12T | ENSG00000202582 | -                                                           | ENST00000365712 | chr12_50271495-50271495_C_T   | 401R>H  | Substitution | Nonsynonymous coding | 29% |
| MM12T | ENSG00000204325 | -                                                           | ENST00000226258 | chr17_73620880-73620880_G_A   | 249E>K  | Substitution | Nonsynonymous coding | 31% |
| MM12T | ENSG00000204987 | -                                                           | ENST00000378229 | chr7_141883072-141883072_G_T  | 202A>S  | Substitution | Nonsynonymous coding | 11% |
| MM12T | ENSG00000204987 | -                                                           | ENST00000378229 | chr7_141901351-141901351_C_T  | 642T>I  | Substitution | Nonsynonymous coding | 15% |
| MM12T | ENSG00000206016 | -                                                           | ENST00000382619 | chr7_821821-821821_C_T        | 29R>W   | Substitution | Nonsynonymous coding | 16% |
| MM12T | ENSG00000206016 | -                                                           | ENST00000382619 | chr7_822008-822008_G_A        | 91R>H   | Substitution | Nonsynonymous coding | 13% |
| MM12T | ENSG00000214088 | -                                                           | ENST00000397504 | chr7_141837298-141837298_G_A  | 305V>I  | Substitution | Nonsynonymous coding | 15% |
| MM12T | ENSG00000214395 | -                                                           | ENST00000398271 | chr6_116947208-116947208_G_A  | 1G>E    | Substitution | Nonsynonymous coding | 24% |
| MM12T | ENSG00000214877 | -                                                           | ENST00000399160 | chr9_94949164-94949164_G_A    | 174A>V  | Substitution | Nonsynonymous coding | 31% |
| MM12T | ENSG00000220191 | -                                                           | ENST00000404353 | chr10_81680172-81680172_G_T   | 30K>N   | Substitution | Nonsynonymous coding | 10% |
| MM12T | ENSG00000223354 | -                                                           | ENST00000412854 | chr13_25715858-25715858__A    | NA      | Insertion    | Frameshift           | 23% |
| MM12T | ENSG00000226190 | -                                                           | ENST00000437239 | chr14_107078537-107078537_G_A | 63R>C   | Substitution | Nonsynonymous coding | 13% |
| MM12T | ENSG00000226778 | -                                                           | ENST00000412457 | chr8_67525327-67525327_T_C    | 34D>G   | Substitution | Nonsynonymous coding | 35% |
| MM12T | ENSG00000231657 | -                                                           | ENST00000441104 | chr11_558069-558069_G_        | NA      | Deletion     | Frameshift           | 36% |
| MM12T | ENSG00000233530 | -                                                           | ENST00000419858 | chr1_31902395-31902395_G_T    | 74L>M   | Substitution | Nonsynonymous coding | 32% |
| MM12T | ENSG00000233855 | -                                                           | ENST00000426581 | chr14_106322218-106322218_C_T | 182D>N  | Substitution | Nonsynonymous coding | 15% |
| MM12T | ENSG00000236410 | -                                                           | ENST00000412560 | chr16_10960301-10960301_C_T   | 52A>V   | Substitution | Nonsynonymous coding | 10% |
| MM12T | ENSG00000236585 | -                                                           | ENST00000451999 | chr17_76422530-76422530_G_A   | 41G>D   | Substitution | Nonsynonymous coding | 15% |
| MM12T | ENTPD2          | ectonucleoside triphosphate diphosphohydrolase 2            | CCDS7026.1      | chr9_139948421-139948421_G_T  | 10P>Q   | Substitution | Nonsynonymous coding | 32% |
| MM12T | ENTPD3          | ectonucleoside triphosphate diphosphohydrolase 3            | CCDS2691.1      | chr3_40456261-40456261_T_C    | 176I>T  | Substitution | Nonsynonymous coding | 31% |
| MM12T | ENTPD4          | ectonucleoside triphosphate diphosphohydrolase 4            | CCDS6041.1      | chr8_23301467-23301467_C_T    | ISV-1>  | Substitution | Splice site acceptor | 19% |
| MM12T | ENTPD6          | ectonucleoside triphosphate diphosphohydrolase 6 (putative) | CCDS13170.1     | chr20_25204788-25204788_A_C   | 413K>T  | Substitution | Nonsynonymous coding | 27% |
| MM12T | ENTPD7          | ectonucleoside triphosphate diphosphohydrolase 7            | CCDS7480.1      | chr10_101421342-101421342_C_T | 50R>X   | Substitution | Nonsense             | 11% |
| MM12T | ENY2            | enhancer of yellow 2 homolog (Drosophila)                   | CCDS43762.1     | chr8_110348432-110348432_C_T  | 28R>C   | Substitution | Nonsynonymous coding | 34% |
| MM12T | EP300           | E1A binding protein p300                                    | CCDS14010.1     | chr22_41542746-41542746_G_A   | 686G>D  | Substitution | Nonsynonymous coding | 12% |
| MM12T | EP400           | E1A binding protein p400                                    | CCDS31929.1     | chr12_132551915-132551915_G_A | 2919V>M | Substitution | Nonsynonymous coding | 28% |

|       |          |                                                                                        |                 |                               |         |              |                      |     |
|-------|----------|----------------------------------------------------------------------------------------|-----------------|-------------------------------|---------|--------------|----------------------|-----|
| MM12T | EP400    | E1A binding protein p400                                                               | CCDS11929.1     | chr12_132464311-132464311_C_T | 469Q>X  | Substitution | Nonsense             | 38% |
| MM12T | EPB41L1  | erythrocyte membrane protein band 4.1-like 1                                           | ENST00000344237 | chr20_34794302-34794302_G_T   | 343G>X  | Substitution | Nonsense             | 29% |
| MM12T | EPB41L3  | erythrocyte membrane protein band 4.1-like 3                                           | CCDS11838.1     | chr18_5395621-5395621_G_A     | 1020T>M | Substitution | Nonsynonymous coding | 25% |
| MM12T | EPB41L3  | erythrocyte membrane protein band 4.1-like 3                                           | CCDS11838.1     | chr18_5428360-5428360_C_A     | 339K>N  | Substitution | Nonsynonymous coding | 27% |
| MM12T | EPB41L3  | erythrocyte membrane protein band 4.1-like 3                                           | CCDS11838.1     | chr18_5478291-5478291_C_T     | 110M>I  | Substitution | Nonsynonymous coding | 22% |
| MM12T | EPB41L5  | erythrocyte membrane protein band 4.1 like 5                                           | CCDS2130.1      | chr2_120932419-120932419_C_T  | 713S>F  | Substitution | Nonsynonymous coding | 14% |
| MM12T | EPB49    | erythrocyte membrane protein band 4.9 (dematin)                                        | CCDS6020.1      | chr8_21926526-21926526_G_T    | ISV-1>  | Substitution | Splice site acceptor | 28% |
| MM12T | EPC1     | enhancer of polycomb homolog 1 (Drosophila)                                            | CCDS7172.1      | chr10_32582026-32582026_G_A   | 186R>X  | Substitution | Nonsense             | 16% |
| MM12T | EPG5     | ectopic P-granules autophagy protein 5 homolog (C. elegans)                            | CCDS11926.2     | chr18_43526703-43526703_G_A   | 535P>S  | Substitution | Nonsynonymous coding | 28% |
| MM12T | EPHA3    | EPH receptor A3                                                                        | CCDS2922.1      | chr3_89468516-89468516_C_T    | 684R>X  | Substitution | Nonsense             | 20% |
| MM12T | EPHA6    | EPH receptor A6                                                                        | CCDS46876.1     | chr3_96706463-96706463_C_T    | 247A>V  | Substitution | Nonsynonymous coding | 26% |
| MM12T | EPHA7    | EPH receptor A7                                                                        | CCDS5031.1      | chr6_93969173-93969173_T_C    | 608Y>C  | Substitution | Nonsynonymous coding | 20% |
| MM12T | EPHA7    | EPH receptor A7                                                                        | CCDS5031.1      | chr6_94068079-94068079_G_A    | 295R>C  | Substitution | Nonsynonymous coding | 49% |
| MM12T | EPHB2    | EPH receptor B2                                                                        | CCDS230.1       | chr1_23189599-23189599_G_A    | 294R>Q  | Substitution | Nonsynonymous coding | 22% |
| MM12T | EPHB3    | EPH receptor B3                                                                        | CCDS3268.1      | chr3_184298829-184298829_C_A  | 870L>I  | Substitution | Nonsynonymous coding | 31% |
| MM12T | EPM2AIP1 | EPM2A (laforin) interacting protein 1                                                  | CCDS46790.1     | chr3_37033763-37033763_C_T    | 269S>N  | Substitution | Nonsynonymous coding | 11% |
| MM12T | EPN2     | epsin 2                                                                                | CCDS11203.1     | chr17_19186703-19186703_C_T   | 91R>C   | Substitution | Nonsynonymous coding | 28% |
| MM12T | EPN3     | epsin 3                                                                                | CCDS11570.1     | chr17_48614374-48614374_C_T   | 153R>C  | Substitution | Nonsynonymous coding | 28% |
| MM12T | EPPK1    | epiplakin 1                                                                            | NM_031308       | chr8_144945063-144945063_G_A  | 787R>C  | Substitution | Nonsynonymous coding | 36% |
| MM12T | EPS8     | epidermal growth factor receptor pathway substrate 8                                   | CCDS31753.1     | chr12_15776224-15776224__A    | NA      | Insertion    | Splice site acceptor | 17% |
| MM12T | EPS8L1   | EPS8-like 1 [Source:HGNC Symbol;Acc:21295]                                             | CCDS12914.1     | chr19_55597298-55597298_G_A   | 492R>H  | Substitution | Nonsynonymous coding | 19% |
| MM12T | EPYC     | epiphycan                                                                              | CCDS31870.1     | chr12_91372043-91372044_AA_   | NA      | Deletion     | Splice site acceptor | 20% |
| MM12T | ERBB2    | v-erb-b2 erythroblastic leukemia viral oncogene homolog 2, neuro/glioblastoma          | CCDS32642.1     | chr17_37866135-37866135_G_A   | ISV+1>  | Substitution | Splice site donor    | 19% |
| MM12T | ERBB3    | v-erb-b2 erythroblastic leukemia viral oncogene homolog 3 (avian)                      | CCDS31833.1     | chr12_56474091-56474091_G_A   | 3A>T    | Substitution | Nonsynonymous coding | 28% |
| MM12T | ERBB3    | v-erb-b2 erythroblastic leukemia viral oncogene homolog 3 (avian)                      | CCDS31833.1     | chr12_56493456-56493456_G_A   | 955R>H  | Substitution | Nonsynonymous coding | 11% |
| MM12T | ERC1     | ELKS/RAB6-interacting/CAST family member 1                                             | CCDS8508.1      | chr12_1137085-1137085_C_T     | 6R>C    | Substitution | Nonsynonymous coding | 24% |
| MM12T | ERCC1    | excision repair cross-complementing rodent repair deficiency, complementation group 1  | CCDS12663.1     | chr19_45923683-45923683_C_A   | 108R>S  | Substitution | Nonsynonymous coding | 32% |
| MM12T | ERCC2    | excision repair cross-complementing rodent repair deficiency, complementation group 2  | CCDS33049.1     | chr19_45856014-45856014_C_T   | 631R>H  | Substitution | Nonsynonymous coding | 31% |
| MM12T | ERCC2    | excision repair cross-complementing rodent repair deficiency, complementation group 2  | CCDS33049.1     | chr19_45858067-45858067_G_T   | 529A>D  | Substitution | Nonsynonymous coding | 28% |
| MM12T | ERCC6L   | excision repair cross-complementing rodent repair deficiency, complementation group 6- | CCDS35329.1     | chrX_71425591-71425591_T_G    | 1009E>A | Substitution | Nonsynonymous coding | 11% |
| MM12T | ERGIC1   | endoplasmic reticulum-golgi intermediate compartment (ERGIC) 1                         | ENST00000265089 | chr5_172342557-172342557_C_T  | 138R>C  | Substitution | Nonsynonymous coding | 31% |
| MM12T | ERGIC3   | ERGIC and golgi 3                                                                      | CCDS13258.1     | chr20_34144868-34144868_C_T   | 340T>M  | Substitution | Nonsynonymous coding | 28% |

|       |        |                                                             |                 |                               |         |              |                      |     |
|-------|--------|-------------------------------------------------------------|-----------------|-------------------------------|---------|--------------|----------------------|-----|
| MM12T | ERN1   | endoplasmic reticulum to nucleus signaling 1                | CCDS45762.1     | chr17_62144065-62144065_A_G   | 270F>L  | Substitution | Nonsynonymous coding | 13% |
| MM12T | ERN2   | endoplasmic reticulum to nucleus signaling 2                | CCDS32407.1     | chr16_23702279-23702279_C_T   | 933R>H  | Substitution | Nonsynonymous coding | 14% |
| MM12T | ERN2   | endoplasmic reticulum to nucleus signaling 2                | CCDS32407.1     | chr16_23716337-23716337_G_A   | 289R>C  | Substitution | Nonsynonymous coding | 19% |
| MM12T | ERP27  | endoplasmic reticulum protein 27                            | CCDS8670.1      | chr12_15090917-15090917_G_A   | 55A>V   | Substitution | Nonsynonymous coding | 14% |
| MM12T | ERV3-1 | endogenous retrovirus group 3, member 1                     | CCDS47595.1     | chr7_64453199-64453199_G_A    | 69S>L   | Substitution | Nonsynonymous coding | 25% |
| MM12T | ESCO2  | establishment of cohesion 1 homolog 2 (S. cerevisiae)       | CCDS34872.1     | chr8_27634330-27634330_C_T    | 169R>X  | Substitution | Nonsense             | 13% |
| MM12T | ESPL1  | extra spindle pole bodies homolog 1 (S. cerevisiae)         | CCDS8852.1      | chr12_53664188-53664188_G_T   | 390Q>H  | Substitution | Nonsynonymous coding | 32% |
| MM12T | ESPL1  | extra spindle pole bodies homolog 1 (S. cerevisiae)         | CCDS8852.1      | chr12_53687185-53687185_G_A   | 2097R>H | Substitution | Nonsynonymous coding | 14% |
| MM12T | ESPNL  | espin-like                                                  | CCDS2525.1      | chr2_239037448-239037448_G_A  | 439R>Q  | Substitution | Nonsynonymous coding | 13% |
| MM12T | ESRP1  | epithelial splicing regulatory protein 1                    | CCDS47897.1     | chr8_95686621-95686621_T_C    | 513M>T  | Substitution | Nonsynonymous coding | 29% |
| MM12T | ESRRG  | estrogen-related receptor gamma                             | CCDS41468.1     | chr1_216692665-216692665_C_T  | 321E>K  | Substitution | Nonsynonymous coding | 29% |
| MM12T | ESYT1  | extended synaptotagmin-like protein 1                       | CCDS8904.1      | chr12_56526521-56526521_C_T   | 394P>S  | Substitution | Nonsynonymous coding | 35% |
| MM12T | ESYT1  | extended synaptotagmin-like protein 1                       | CCDS8904.1      | chr12_56531820-56531820_C_T   | 737R>C  | Substitution | Nonsynonymous coding | 32% |
| MM12T | ESYT1  | extended synaptotagmin-like protein 1                       | CCDS8904.1      | chr12_56532216-56532216_C_T   | 789T>I  | Substitution | Nonsynonymous coding | 26% |
| MM12T | ETAA1  | Ewing tumor-associated antigen 1                            | CCDS1882.1      | chr2_67630904-67630904_C_T    | 364P>S  | Substitution | Nonsynonymous coding | 30% |
| MM12T | ETFDH  | electron-transferring-flavoprotein dehydrogenase            | CCDS3800.1      | chr4_159627385-159627385_G_A  | 444V>I  | Substitution | Nonsynonymous coding | 18% |
| MM12T | ETS1   | v-ets erythroblastosis virus E26 oncogene homolog 1 (avian) | CCDS44767.1     | chr11_128350152-128350152_G_A | 353R>W  | Substitution | Nonsynonymous coding | 13% |
| MM12T | ETS1   | v-ets erythroblastosis virus E26 oncogene homolog 1 (avian) | CCDS44767.1     | chr11_128360403-128360403_C_T | 95A>T   | Substitution | Nonsynonymous coding | 25% |
| MM12T | ETV5   | ets variant 5                                               | CCDS33906.1     | chr3_185766567-185766567_G_A  | 465P>L  | Substitution | Nonsynonymous coding | 17% |
| MM12T | EVA1C  | eva-1 homolog C (C. elegans)                                | CCDS13614.1     | chr21_33887382-33887382_C_T   | 403S>F  | Substitution | Nonsynonymous coding | 36% |
| MM12T | EVA1C  | eva-1 homolog C (C. elegans)                                | CCDS13614.1     | chr21_33887264-33887264_G_T   | 364G>X  | Substitution | Nonsense             | 15% |
| MM12T | EVI2A  | ecotropic viral integration site 2A                         | CCDS32608.1     | chr17_29645706-29645706_C_A   | 132S>I  | Substitution | Nonsynonymous coding | 32% |
| MM12T | EVI2B  | ecotropic viral integration site 2B                         | CCDS11266.1     | chr17_29631642-29631642_G_A   | 329A>V  | Substitution | Nonsynonymous coding | 35% |
| MM12T | EVPL   | envoplakin                                                  | CCDS11737.1     | chr17_74005000-74005000_C_T   | 1429R>H | Substitution | Nonsynonymous coding | 13% |
| MM12T | EVPL   | envoplakin                                                  | CCDS11737.1     | chr17_74005615-74005615_C_A   | 1224R>M | Substitution | Nonsynonymous coding | 37% |
| MM12T | EVPLL  | envoplakin-like                                             | CCDS45626.1     | chr17_18285949-18285949_G_A   | 157A>T  | Substitution | Nonsynonymous coding | 10% |
| MM12T | EVX2   | even-skipped homeobox 2                                     | CCDS33333.1     | chr2_176948128-176948128_C_T  | 126R>H  | Substitution | Nonsynonymous coding | 36% |
| MM12T | EVX2   | even-skipped homeobox 2                                     | CCDS33333.1     | chr2_176948384-176948384_C_T  | 41E>K   | Substitution | Nonsynonymous coding | 13% |
| MM12T | EXD2   | exonuclease 3'-5' domain containing 2                       | ENST00000312994 | chr14_69676833-69676833_G_A   | 113R>H  | Substitution | Nonsynonymous coding | 33% |
| MM12T | EXO1   | exonuclease 1                                               | CCDS1620.1      | chr1_242042480-242042480_G_A  | 648M>I  | Substitution | Nonsynonymous coding | 36% |
| MM12T | EXOC1  | exocyst complex component 1                                 | CCDS3502.1      | chr4_56768600-56768600_C_T    | 810R>C  | Substitution | Nonsynonymous coding | 17% |
| MM12T | EXOC2  | exocyst complex component 2                                 | CCDS34327.1     | chr6_491138-491138_T_C        | 870T>A  | Substitution | Nonsynonymous coding | 23% |

|       |          |                                                    |             |                               |         |              |                      |     |
|-------|----------|----------------------------------------------------|-------------|-------------------------------|---------|--------------|----------------------|-----|
| MM12T | EXOC3    | exocyst complex component 3                        | NM_007277   | chr5_453602-453602_G_A        | 161R>H  | Substitution | Nonsynonymous coding | 14% |
| MM12T | EXOC6    | exocyst complex component 6                        | CCDS7424.2  | chr10_94653132-94653132_C_T   | 43A>V   | Substitution | Nonsynonymous coding | 30% |
| MM12T | EXOC6    | exocyst complex component 6                        | CCDS7424.2  | chr10_94757290-94757290_G_A   | 671M>I  | Substitution | Nonsynonymous coding | 11% |
| MM12T | EXOC6    | exocyst complex component 6                        | CCDS7424.2  | chr10_94688093-94688093_T_C   | ISV-3>  | Substitution | Splice site acceptor | 11% |
| MM12T | EXOC8    | exocyst complex component 8                        | CCDS1593.1  | chr1_231471733-231471733_C_A  | 587G>C  | Substitution | Nonsynonymous coding | 26% |
| MM12T | EXOC8    | exocyst complex component 8                        | CCDS1593.1  | chr1_231472161-231472161_C_T  | 444R>H  | Substitution | Nonsynonymous coding | 30% |
| MM12T | EXPH5    | exophilin 5                                        | CCDS8341.1  | chr11_108383613-108383613_C_T | 874C>Y  | Substitution | Nonsynonymous coding | 28% |
| MM12T | EXT1     | exostosin 1                                        | CCDS6324.1  | chr8_118847712-118847712_C_T  | 379V>I  | Substitution | Nonsynonymous coding | 38% |
| MM12T | EXT2     | exostosin 2                                        | CCDS7908.1  | chr11_44129790-44129790_G_T   | 176Q>H  | Substitution | Nonsynonymous coding | 15% |
| MM12T | EXTL3    | exostosins (multiple)-like 3                       | CCDS6070.1  | chr8_28608217-28608217_C_T    | 865A>V  | Substitution | Nonsynonymous coding | 11% |
| MM12T | EYA1     | eyes absent homolog 1 (Drosophila)                 | CCDS34906.1 | chr8_72234013-72234013_G_A    | 125A>V  | Substitution | Nonsynonymous coding | 36% |
| MM12T | EYS      | eyes shut homolog (Drosophila)                     | CCDS47445.1 | chr6_66094317-66094317_T_C    | 421N>D  | Substitution | Nonsynonymous coding | 21% |
| MM12T | F2RL3    | coagulation factor II (thrombin) receptor-like 3   | CCDS12350.1 | chr19_17001115-17001115_G_A   | 281A>T  | Substitution | Nonsynonymous coding | 14% |
| MM12T | F5       | coagulation factor V (proaccelerin, labile factor) | CCDS1281.1  | chr1_169494129-169494129_C_T  | 1912G>R | Substitution | Nonsynonymous coding | 32% |
| MM12T | FADS2    | fatty acid desaturase 2                            | CCDS8012.1  | chr11_61631185-61631185_G_A   | 362A>T  | Substitution | Nonsynonymous coding | 25% |
| MM12T | FADS3    | fatty acid desaturase 3                            | CCDS8013.1  | chr11_61647584-61647584_G_A   | 85R>C   | Substitution | Nonsynonymous coding | 13% |
| MM12T | FADS3    | fatty acid desaturase 3                            | CCDS8013.1  | chr11_61643451-61643451_G_    | NA      | Deletion     | Splice site acceptor | 20% |
| MM12T | FAIM3    | Fas apoptotic inhibitory molecule 3                | CCDS1473.1  | chr1_207083120-207083120_T_G  | 312N>T  | Substitution | Nonsynonymous coding | 29% |
| MM12T | FAM101A  | family with sequence similarity 101, member A      | CCDS9258.1  | chr12_124796421-124796421_G_A | 8V>M    | Substitution | Nonsynonymous coding | 14% |
| MM12T | FAM102B  | family with sequence similarity 102, member B      | CCDS30786.2 | chr1_109170872-109170872_T_C  | 214S>P  | Substitution | Nonsynonymous coding | 11% |
| MM12T | FAM108B1 | family with sequence similarity 108, member B1     | CCDS35042.1 | chr9_74485173-74485173_C_T    | 158G>D  | Substitution | Nonsynonymous coding | 22% |
| MM12T | FAM109B  | family with sequence similarity 109, member B      | CCDS33655.1 | chr22_42473469-42473469_C_T   | 58R>C   | Substitution | Nonsynonymous coding | 33% |
| MM12T | FAM110A  | family with sequence similarity 110, member A      | CCDS13008.1 | chr20_826222-826222_C_T       | 259R>W  | Substitution | Nonsynonymous coding | 33% |
| MM12T | FAM111A  | family with sequence similarity 111, member A      | CCDS7973.1  | chr11_58919526-58919526_C_T   | 129R>C  | Substitution | Nonsynonymous coding | 11% |
| MM12T | FAM120C  | family with sequence similarity 120C               | CCDS14356.1 | chrX_54107891-54107891_G_T    | 948L>I  | Substitution | Nonsynonymous coding | 41% |
| MM12T | FAM120C  | family with sequence similarity 120C               | CCDS14356.1 | chrX_54209433-54209433_G_A    | 67L>F   | Substitution | Nonsynonymous coding | 28% |
| MM12T | FAM124A  | family with sequence similarity 124A               | CCDS9427.1  | chr13_51825816-51825816_C_A   | 141L>M  | Substitution | Nonsynonymous coding | 20% |
| MM12T | FAM124B  | family with sequence similarity 124B               | CCDS46527.1 | chr2_225266204-225266204_C_T  | 94W>X   | Substitution | Nonsense             | 15% |
| MM12T | FAM129A  | family with sequence similarity 129, member A      | CCDS1364.1  | chr1_184764173-184764173_C_T  | 909D>N  | Substitution | Nonsynonymous coding | 13% |
| MM12T | FAM129A  | family with sequence similarity 129, member A      | CCDS1364.1  | chr1_18477288-18477288_G_A    | 419R>C  | Substitution | Nonsynonymous coding | 24% |
| MM12T | FAM129B  | family with sequence similarity 129, member B      | CCDS35145.1 | chr9_130271282-130271282_C_A  | 430K>N  | Substitution | Nonsynonymous coding | 10% |
| MM12T | FAM132A  | family with sequence similarity 132, member A      | CCDS30554.1 | chr1_1177932-1177932_G_A      | 302T>M  | Substitution | Nonsynonymous coding | 37% |

|       |          |                                                |                 |                              |         |              |                      |     |
|-------|----------|------------------------------------------------|-----------------|------------------------------|---------|--------------|----------------------|-----|
| MM12T | FAM135B  | family with sequence similarity 135, member B  | CCDS6375.2      | chr8_139164067-139164067_C_T | 884R>H  | Substitution | Nonsynonymous coding | 35% |
| MM12T | FAM135B  | family with sequence similarity 135, member B  | CCDS6375.2      | chr8_139164731-139164731_T_C | 663T>A  | Substitution | Nonsynonymous coding | 19% |
| MM12T | FAM135B  | family with sequence similarity 135, member B  | CCDS6375.2      | chr8_139207501-139207501_C_A | 291Q>H  | Substitution | Nonsynonymous coding | 42% |
| MM12T | FAM13C   | family with sequence similarity 13, member C   | ENST00000435852 | chr10_61014086-61014086_G_T  | 452L>M  | Substitution | Nonsynonymous coding | 31% |
| MM12T | FAM151A  | family with sequence similarity 151, member A  | CCDS594.1       | chr1_55075512-55075512_T_C   | 396E>G  | Substitution | Nonsynonymous coding | 30% |
| MM12T | FAM151A  | family with sequence similarity 151, member A  | CCDS594.1       | chr1_55088986-55088986_G_A   | 28A>V   | Substitution | Nonsynonymous coding | 21% |
| MM12T | FAM159A  | family with sequence similarity 159, member A  | NM_001042693    | chr1_53108540-53108540_G_T   | 63G>V   | Substitution | Nonsynonymous coding | 42% |
| MM12T | FAM159A  | family with sequence similarity 159, member A  | NM_001042693    | chr1_53122629-53122629_G_A   | 164A>T  | Substitution | Nonsynonymous coding | 28% |
| MM12T | FAM160B2 | family with sequence similarity 160, member B2 | CCDS6021.2      | chr8_21958960-21958960_C_A   | 542C>X  | Substitution | Nonsense             | 12% |
| MM12T | FAM161A  | family with sequence similarity 161, member A  | CCDS42687.2     | chr2_62067439-62067439_G_A   | 234P>S  | Substitution | Nonsynonymous coding | 20% |
| MM12T | FAM162B  | family with sequence similarity 162, member B  | CCDS43497.1     | chr6_117086580-117086580_G_A | 54P>S   | Substitution | Nonsynonymous coding | 26% |
| MM12T | FAM170A  | family with sequence similarity 170, member A  | CCDS43353.1     | chr5_118969778-118969778_C_T | 112T>I  | Substitution | Nonsynonymous coding | 21% |
| MM12T | FAM171B  | family with sequence similarity 171, member B  | CCDS33347.1     | chr2_187626468-187626468_G_A | 467V>I  | Substitution | Nonsynonymous coding | 26% |
| MM12T | FAM172A  | family with sequence similarity 172, member A  | CCDS4069.1      | chr5_93217382-93217382_C_T   | 194V>I  | Substitution | Nonsynonymous coding | 28% |
| MM12T | FAM177A1 | family with sequence similarity 177, member A1 | CCDS9653.2      | chr14_35546395-35546395_C_A  | 127L>I  | Substitution | Nonsynonymous coding | 20% |
| MM12T | FAM179B  | family with sequence similarity 179, member B  | CCDS9681.1      | chr14_45431853-45431853_G_A  | 77A>T   | Substitution | Nonsynonymous coding | 31% |
| MM12T | FAM180A  | family with sequence similarity 180, member A  | CCDS5841.1      | chr7_135433281-135433281_C_A | 16E>D   | Substitution | Nonsynonymous coding | 31% |
| MM12T | FAM184A  | family with sequence similarity 184, member A  | CCDS43499.1     | chr6_119399367-119399367_C_T | 33S>N   | Substitution | Nonsynonymous coding | 53% |
| MM12T | FAM184A  | family with sequence similarity 184, member A  | CCDS43499.1     | chr6_119345660-119345660_C_A | 160E>X  | Substitution | Nonsense             | 16% |
| MM12T | FAM184B  | family with sequence similarity 184, member B  | CCDS47033.1     | chr4_17710846-17710846_C_T   | 188G>D  | Substitution | Nonsynonymous coding | 31% |
| MM12T | FAM186B  | family with sequence similarity 186, member B  | CCDS8788.1      | chr12_49998291-49998291_C_T  | 43D>N   | Substitution | Nonsynonymous coding | 13% |
| MM12T | FAM187A  | family with sequence similarity 187, member A  | ENST00000331733 | chr17_42981561-42981561_C_A  | 122L>M  | Substitution | Nonsynonymous coding | 35% |
| MM12T | FAM188B  | family with sequence similarity 188, member B  | CCDS5431.1      | chr7_30951846-30951846_G_A   | 108A>T  | Substitution | Nonsynonymous coding | 11% |
| MM12T | FAM198A  | family with sequence similarity 198, member A  | CCDS46808.1     | chr3_43073865-43073865_G_A   | 37R>H   | Substitution | Nonsynonymous coding | 31% |
| MM12T | FAM198A  | family with sequence similarity 198, member A  | CCDS46808.1     | chr3_43074608-43074608_G_A   | 285A>T  | Substitution | Nonsynonymous coding | 33% |
| MM12T | FAM198A  | family with sequence similarity 198, member A  | CCDS46808.1     | chr3_43097682-43097682_C_T   | 511A>V  | Substitution | Nonsynonymous coding | 33% |
| MM12T | FAM208A  | family with sequence similarity 208, member A  | CCDS46853.1     | chr3_56667772-56667772_G_A   | 1016T>I | Substitution | Nonsynonymous coding | 26% |
| MM12T | FAM208A  | family with sequence similarity 208, member A  | CCDS46853.1     | chr3_56667833-56667833_C_A   | 996G>C  | Substitution | Nonsynonymous coding | 29% |
| MM12T | FAM208B  | family with sequence similarity 208, member B  | CCDS41485.1     | chr10_5789777-5789777_G_T    | 1465D>Y | Substitution | Nonsynonymous coding | 29% |
| MM12T | FAM211A  | family with sequence similarity 211, member A  | CCDS45620.1     | chr17_16365615-16365615_T_C  | 111D>G  | Substitution | Nonsynonymous coding | 28% |
| MM12T | FAM213A  | family with sequence similarity 213, member A  | CCDS7368.1      | chr10_82182195-82182195_G_T  | 67K>N   | Substitution | Nonsynonymous coding | 28% |
| MM12T | FAM217A  | family with sequence similarity 217, member A  | CCDS4489.1      | chr6_4069320-4069320_C_T     | 379W>X  | Substitution | Nonsense             | 11% |

|       |         |                                               |              |                               |         |              |                      |     |
|-------|---------|-----------------------------------------------|--------------|-------------------------------|---------|--------------|----------------------|-----|
| MM12T | FAM221B | family with sequence similarity 221, member B | CCDS43799.1  | chr9_35826097-35826097_G_     | NA      | Deletion     | Frameshift           | 27% |
| MM12T | FAM227A | family with sequence similarity 227, member A | NM_001013647 | chr22_39035671-39035671_G_A   | 95P>L   | Substitution | Nonsynonymous coding | 32% |
| MM12T | FAM3B   | family with sequence similarity 3, member B   | CCDS13671.1  | chr21_42720607-42720607_G_A   | 192A>T  | Substitution | Nonsynonymous coding | 27% |
| MM12T | FAM46B  | family with sequence similarity 46, member B  | CCDS294.2    | chr1_27332740-27332740_G_A    | 325R>C  | Substitution | Nonsynonymous coding | 35% |
| MM12T | FAM46B  | family with sequence similarity 46, member B  | CCDS294.2    | chr1_27333442-27333442_G_A    | 91R>C   | Substitution | Nonsynonymous coding | 34% |
| MM12T | FAM47A  | family with sequence similarity 47, member A  | CCDS43926.1  | chrX_34149902-34149902_C_T    | 165C>Y  | Substitution | Nonsynonymous coding | 28% |
| MM12T | FAM47E  | family with sequence similarity 47, member E  | CCDS47081.1  | chr4_77192742-77192742_G_T    | 231E>X  | Substitution | Nonsense             | 16% |
| MM12T | FAM50B  | family with sequence similarity 50, member B  | CCDS4487.1   | chr6_3850692-3850692_C_T      | 216A>V  | Substitution | Nonsynonymous coding | 24% |
| MM12T | FAM50B  | family with sequence similarity 50, member B  | CCDS4487.1   | chr6_3850883-3850883_G_A      | 280A>T  | Substitution | Nonsynonymous coding | 12% |
| MM12T | FAM53B  | family with sequence similarity 53, member B  | CCDS7641.1   | chr10_126370235-126370235_G_A | 283R>W  | Substitution | Nonsynonymous coding | 11% |
| MM12T | FAM53C  | family with sequence similarity 53, member C  | CCDS4204.1   | chr5_137680606-137680606_C_T  | 77H>Y   | Substitution | Nonsynonymous coding | 11% |
| MM12T | FAM53C  | family with sequence similarity 53, member C  | CCDS4204.1   | chr5_137681236-137681236_C_T  | 287R>W  | Substitution | Nonsynonymous coding | 30% |
| MM12T | FAM5B   | family with sequence similarity 5, member B   | CCDS1320.1   | chr1_177247786-177247786_G_A  | 367S>N  | Substitution | Nonsynonymous coding | 27% |
| MM12T | FAM65A  | family with sequence similarity 65, member A  | CCDS10840.1  | chr16_67576850-67576850_G_A   | 721A>T  | Substitution | Nonsynonymous coding | 30% |
| MM12T | FAM65C  | family with sequence similarity 65, member C  | CCDS13431.2  | chr20_49209724-49209724_C_A   | 737R>M  | Substitution | Nonsynonymous coding | 42% |
| MM12T | FAM65C  | family with sequence similarity 65, member C  | CCDS13431.2  | chr20_49227741-49227741_C_T   | 113A>T  | Substitution | Nonsynonymous coding | 36% |
| MM12T | FAM69C  | family with sequence similarity 69, member C  | CCDS42445.2  | chr18_72114245-72114245_C_T   | 158A>T  | Substitution | Nonsynonymous coding | 28% |
| MM12T | FAM71A  | family with sequence similarity 71, member A  | CCDS1507.1   | chr1_212799706-212799706_C_T  | 496T>M  | Substitution | Nonsynonymous coding | 28% |
| MM12T | FAM71F2 | family with sequence similarity 71, member F2 | CCDS47701.1  | chr7_128323071-128323071_C_A  | 263S>Y  | Substitution | Nonsynonymous coding | 23% |
| MM12T | FAM81A  | family with sequence similarity 81, member A  | CCDS45269.1  | chr15_59799425-59799425_A_G   | 143I>V  | Substitution | Nonsynonymous coding | 36% |
| MM12T | FAM83A  | family with sequence similarity 83, member A  | CCDS6340.1   | chr8_124195199-124195199_G_A  | 35A>T   | Substitution | Nonsynonymous coding | 15% |
| MM12T | FAM83B  | family with sequence similarity 83, member B  | CCDS34479.1  | chr6_54735062-54735062_G_A    | 6M>I    | Substitution | Nonsynonymous coding | 25% |
| MM12T | FAM83H  | family with sequence similarity 83, member H  | CCDS6410.2   | chr8_144808806-144808806_G_A  | 942S>F  | Substitution | Nonsynonymous coding | 34% |
| MM12T | FAN1    | FANCD2/FANCI-associated nuclease 1            | CCDS32186.1  | chr15_31217406-31217406_C_T   | 750A>V  | Substitution | Nonsynonymous coding | 29% |
| MM12T | FAN1    | FANCD2/FANCI-associated nuclease 1            | CCDS32186.1  | chr15_31218056-31218056_C_T   | 801A>V  | Substitution | Nonsynonymous coding | 13% |
| MM12T | FANCI   | Fanconi anemia, complementation group I       | CCDS45346.1  | chr15_89828346-89828346_G_A   | 573S>N  | Substitution | Nonsynonymous coding | 26% |
| MM12T | FASLG   | Fas ligand (TNF superfamily, member 6)        | CCDS1304.1   | chr1_172634810-172634810_G_T  | 167G>V  | Substitution | Nonsynonymous coding | 30% |
| MM12T | FASLG   | Fas ligand (TNF superfamily, member 6)        | CCDS1304.1   | chr1_172635129-172635129_G_T  | 273Q>H  | Substitution | Nonsynonymous coding | 14% |
| MM12T | FASN    | fatty acid synthase                           | CCDS11801.1  | chr17_80043001-80043001_G_T   | 1440P>H | Substitution | Nonsynonymous coding | 21% |
| MM12T | FASN    | fatty acid synthase                           | CCDS11801.1  | chr17_80037337-80037337_G_A   | 2432Q>X | Substitution | Nonsense             | 23% |
| MM12T | FASTKD3 | FAST kinase domains 3                         | CCDS3873.1   | chr5_7867331-7867331_G_A      | 289S>F  | Substitution | Nonsynonymous coding | 19% |
| MM12T | FAT1    | FAT tumor suppressor homolog 1 (Drosophila)   | CCDS47177.1  | chr4_187521072-187521072_C_T  | 4028C>Y | Substitution | Nonsynonymous coding | 22% |

|       |        |                                                            |                 |                              |         |              |                      |     |
|-------|--------|------------------------------------------------------------|-----------------|------------------------------|---------|--------------|----------------------|-----|
| MM12T | FAT1   | FAT tumor suppressor homolog 1 (Drosophila)                | CCDS47177.1     | chr4_187535345-187535345_C_A | 3077G>C | Substitution | Nonsynonymous coding | 30% |
| MM12T | FAT1   | FAT tumor suppressor homolog 1 (Drosophila)                | CCDS47177.1     | chr4_187540053-187540053_C_A | 2563V>L | Substitution | Nonsynonymous coding | 27% |
| MM12T | FAT1   | FAT tumor suppressor homolog 1 (Drosophila)                | CCDS47177.1     | chr4_187630167-187630167_G_A | 272A>V  | Substitution | Nonsynonymous coding | 24% |
| MM12T | FAT2   | FAT tumor suppressor homolog 2 (Drosophila)                | CCDS4317.1      | chr5_150901233-150901233_C_T | 3641E>K | Substitution | Nonsynonymous coding | 12% |
| MM12T | FAT2   | FAT tumor suppressor homolog 2 (Drosophila)                | CCDS4317.1      | chr5_150925497-150925497_G_A | 1731R>X | Substitution | Nonsense             | 26% |
| MM12T | FAT4   | FAT tumor suppressor homolog 4 (Drosophila)                | CCDS3732.3      | chr4_126355475-126355475_C_T | 2365A>V | Substitution | Nonsynonymous coding | 27% |
| MM12T | FAT4   | FAT tumor suppressor homolog 4 (Drosophila)                | CCDS3732.3      | chr4_126398471-126398471_C_T | 4152A>V | Substitution | Nonsynonymous coding | 17% |
| MM12T | FBF1   | Fas (TNFRSF6) binding factor 1                             | CCDS45779.1     | chr17_73914084-73914084_C_T  | 757V>M  | Substitution | Nonsynonymous coding | 39% |
| MM12T | FBLL1  | fibrillar-like 1                                           | ENST00000453461 | chr5_167957276-167957276_G_A | 256R>H  | Substitution | Nonsynonymous coding | 27% |
| MM12T | FBLN1  | fibulin 1                                                  | CCDS14067.1     | chr22_45943088-45943088_C_T  | ISV+4>  | Substitution | Splice site donor    | 19% |
| MM12T | FBLN2  | fibulin 2                                                  | CCDS46761.1     | chr3_13659779-13659779_C_T   | 645R>C  | Substitution | Nonsynonymous coding | 27% |
| MM12T | FBLN5  | fibulin 5                                                  | CCDS9898.1      | chr14_92343833-92343833_G_A  | 395R>W  | Substitution | Nonsynonymous coding | 11% |
| MM12T | FBN3   | fibrillin 3                                                | CCDS12196.1     | chr19_8130912-8130912_C_T    | 2774R>Q | Substitution | Nonsynonymous coding | 40% |
| MM12T | FBN3   | fibrillin 3                                                | CCDS12196.1     | chr19_8186255-8186255_C_T    | 1033R>H | Substitution | Nonsynonymous coding | 11% |
| MM12T | FBN3   | fibrillin 3                                                | CCDS12196.1     | chr19_8191659-8191659_C_T    | 785G>D  | Substitution | Nonsynonymous coding | 36% |
| MM12T | FBN3   | fibrillin 3                                                | CCDS12196.1     | chr19_8209800-8209800_C_T    | 168A>T  | Substitution | Nonsynonymous coding | 16% |
| MM12T | FBN3   | fibrillin 3                                                | CCDS12196.1     | chr19_8162299-8162299_C_T    | ISV-1>  | Substitution | Splice site acceptor | 34% |
| MM12T | FBXL14 | F-box and leucine-rich repeat protein 14                   | CCDS8509.1      | chr12_1702439-1702439_T_C    | 265N>S  | Substitution | Nonsynonymous coding | 31% |
| MM12T | FBXL16 | F-box and leucine-rich repeat protein 16                   | CCDS10421.1     | chr16_746993-746993_G_A      | 138T>M  | Substitution | Nonsynonymous coding | 31% |
| MM12T | FBXL18 | F-box and leucine-rich repeat protein 18                   | CCDS43546.1     | chr7_5540653-5540653_C_T     | 416R>H  | Substitution | Nonsynonymous coding | 10% |
| MM12T | FBXL18 | F-box and leucine-rich repeat protein 18                   | CCDS43546.1     | chr7_5540744-5540744_G_A     | 386R>C  | Substitution | Nonsynonymous coding | 35% |
| MM12T | FBXL21 | F-box and leucine-rich repeat protein 21 (gene/pseudogene) | NM_012159       | chr5_135276839-135276839_C_T | 262R>X  | Substitution | Nonsense             | 33% |
| MM12T | FBXL4  | F-box and leucine-rich repeat protein 4                    | CCDS5041.1      | chr6_99353417-99353417_C_T   | 330A>T  | Substitution | Nonsynonymous coding | 20% |
| MM12T | FBXL7  | F-box and leucine-rich repeat protein 7                    | NM_012304       | chr5_15928283-15928283_G_A   | 138A>T  | Substitution | Nonsynonymous coding | 30% |
| MM12T | FBXO17 | F-box protein 17                                           | CCDS12526.1     | chr19_39435697-39435697_C_T  | 202R>H  | Substitution | Nonsynonymous coding | 29% |
| MM12T | FBXO2  | F-box protein 2                                            | CCDS130.1       | chr1_11708887-11708887_T_C   | ISV-2>  | Substitution | Splice site acceptor | 31% |
| MM12T | FBXO22 | F-box protein 22                                           | CCDS10287.1     | chr15_76225331-76225331_G_A  | 367R>Q  | Substitution | Nonsynonymous coding | 13% |
| MM12T | FBXO32 | F-box protein 32                                           | CCDS6345.1      | chr8_124516948-124516948_C_T | 292D>N  | Substitution | Nonsynonymous coding | 25% |
| MM12T | FBXO40 | F-box protein 40                                           | CCDS33835.1     | chr3_121341484-121341484_C_A | 403A>D  | Substitution | Nonsynonymous coding | 29% |
| MM12T | FBXO45 | F-box protein 45                                           | CCDS46985.1     | chr3_196311074-196311074_T_C | 249F>S  | Substitution | Nonsynonymous coding | 43% |
| MM12T | FBXO7  | F-box protein 7                                            | CCDS13907.1     | chr22_32891486-32891486_C_A  | 384T>N  | Substitution | Nonsynonymous coding | 28% |
| MM12T | FBXW2  | F-box and WD repeat domain containing 2                    | CCDS43872.1     | chr9_123533659-123533659_T_C | 348Y>C  | Substitution | Nonsynonymous coding | 24% |

|       |        |                                                                        |                 |                              |         |              |                      |     |
|-------|--------|------------------------------------------------------------------------|-----------------|------------------------------|---------|--------------|----------------------|-----|
| MM12T | FBXW5  | F-box and WD repeat domain containing 5                                | CCDS7014.1      | chr9_139835799-139835799_C_T | 454R>Q  | Substitution | Nonsynonymous coding | 13% |
| MM12T | FBXW9  | F-box and WD repeat domain containing 9                                | ENST00000380339 | chr19_12800974-12800974_C_   | NA      | Deletion     | Frameshift           | 37% |
| MM12T | FCGBP  | Fc fragment of IgG binding protein                                     | CCDS12546.1     | chr19_40424435-40424435_C_T  | 590D>N  | Substitution | Nonsynonymous coding | 32% |
| MM12T | FCSD2  | FCH and double SH3 domains 2                                           | CCDS8218.2      | chr11_72551927-72551927_G_A  | 712R>X  | Substitution | Nonsense             | 11% |
| MM12T | FCRL1  | Fc receptor-like 1                                                     | CCDS1170.1      | chr1_157771332-157771332_C_A | 308G>X  | Substitution | Nonsense             | 25% |
| MM12T | FCRL2  | Fc receptor-like 2                                                     | CCDS1168.1      | chr1_157738374-157738374_G_A | 238S>F  | Substitution | Nonsynonymous coding | 30% |
| MM12T | FCRL5  | Fc receptor-like 5                                                     | CCDS1165.1      | chr1_157508981-157508981_C_T | 433A>T  | Substitution | Nonsynonymous coding | 14% |
| MM12T | FCRLB  | Fc receptor-like B                                                     | CCDS30927.1     | chr1_161693367-161693367_G_A | 88R>Q   | Substitution | Nonsynonymous coding | 15% |
| MM12T | FCRLB  | Fc receptor-like B                                                     | CCDS30927.1     | chr1_161695781-161695781_G_A | 160A>T  | Substitution | Nonsynonymous coding | 11% |
| MM12T | FDX1L  | ferredoxin 1-like                                                      | CCDS32905.1     | chr19_10426670-10426670_C_T  | 1M>I    | Substitution | Nonsynonymous coding | 20% |
| MM12T | FDXR   | ferredoxin reductase                                                   | CCDS11707.1     | chr17_72861071-72861071_C_T  | 204A>T  | Substitution | Nonsynonymous coding | 28% |
| MM12T | FER    | fer (fps/fes related) tyrosine kinase                                  | CCDS4098.1      | chr5_108203589-108203589_T_A | 201D>E  | Substitution | Nonsynonymous coding | 33% |
| MM12T | FER1L6 | fer-1-like 6 (C. elegans)                                              | CCDS43767.1     | chr8_125078699-125078699_A_G | 1196K>E | Substitution | Nonsynonymous coding | 17% |
| MM12T | FERMT2 | fermitin family member 2                                               | CCDS45107.1     | chr14_53348130-53348130_G_T  | 195A>D  | Substitution | Nonsynonymous coding | 36% |
| MM12T | FEV    | FEV (ETS oncogene family)                                              | CCDS2428.1      | chr2_219846828-219846828_T_G | 93K>T   | Substitution | Nonsynonymous coding | 33% |
| MM12T | FFAR1  | free fatty acid receptor 1                                             | CCDS12458.1     | chr19_35842776-35842776_G_A  | 108A>T  | Substitution | Nonsynonymous coding | 16% |
| MM12T | FGA    | fibrinogen alpha chain                                                 | CCDS3787.1      | chr4_155506995-155506995_A_T | 529F>Y  | Substitution | Nonsynonymous coding | 36% |
| MM12T | FGD2   | FYVE, RhoGEF and PH domain containing 2                                | CCDS4829.1      | chr6_36990120-36990120_C_T   | 478R>C  | Substitution | Nonsynonymous coding | 50% |
| MM12T | FGD2   | FYVE, RhoGEF and PH domain containing 2                                | ENST00000394459 | chr6_36990885-36990885_G_A   | 358G>D  | Substitution | Nonsynonymous coding | 19% |
| MM12T | FGD2   | FYVE, RhoGEF and PH domain containing 2                                | CCDS4829.1      | chr6_36995328-36995328_C_T   | 577L>F  | Substitution | Nonsynonymous coding | 11% |
| MM12T | FGD6   | FYVE, RhoGEF and PH domain containing 6                                | CCDS31878.1     | chr12_95602839-95602839_T_C  | 741T>A  | Substitution | Nonsynonymous coding | 29% |
| MM12T | FGF11  | fibroblast growth factor 11                                            | CCDS11105.1     | chr17_7344793-7344793_C_A    | 66P>H   | Substitution | Nonsynonymous coding | 22% |
| MM12T | FGF12  | fibroblast growth factor 12                                            | CCDS3301.1      | chr3_191888348-191888348_C_T | 171R>Q  | Substitution | Nonsynonymous coding | 11% |
| MM12T | FGF13  | fibroblast growth factor 13                                            | CCDS14665.1     | chrX_137717759-137717759_T_C | 154T>A  | Substitution | Nonsynonymous coding | 12% |
| MM12T | FGF21  | fibroblast growth factor 21                                            | CCDS12734.1     | chr19_49261307-49261307_C_T  | 154R>W  | Substitution | Nonsynonymous coding | 11% |
| MM12T | FGF3   | fibroblast growth factor 3                                             | CCDS8195.1      | chr11_69631089-69631089_G_A  | 108S>L  | Substitution | Nonsynonymous coding | 12% |
| MM12T | FGF4   | fibroblast growth factor 4                                             | CCDS8194.1      | chr11_69588123-69588123_C_T  | 192R>Q  | Substitution | Nonsynonymous coding | 38% |
| MM12T | FGFR3  | fibroblast growth factor receptor 3                                    | CCDS3353.1      | chr4_1805510-1805510_C_T     | 341A>V  | Substitution | Nonsynonymous coding | 27% |
| MM12T | FHL2   | four and a half LIM domains 2                                          | CCDS2070.1      | chr2_105984111-105984111_C_A | 139K>N  | Substitution | Nonsynonymous coding | 35% |
| MM12T | FHOD3  | formin homology 2 domain containing 3                                  | CCDS32816.1     | chr18_34261459-34261459__AG  | NA      | Insertion    | Frameshift           | 27% |
| MM12T | FIBCD1 | fibrinogen C domain containing 1                                       | CCDS6937.1      | chr9_133799153-133799153_C_T | 276R>H  | Substitution | Nonsynonymous coding | 31% |
| MM12T | FIG4   | FIG4 homolog, SAC1 lipid phosphatase domain containing (S. cerevisiae) | CCDS5078.1      | chr6_110112716-110112716_C_A | 773S>Y  | Substitution | Nonsynonymous coding | 25% |



|       |        |                                                                              |                 |                                |         |              |                      |     |
|-------|--------|------------------------------------------------------------------------------|-----------------|--------------------------------|---------|--------------|----------------------|-----|
| MM12T | FIGN   | fidgetin                                                                     | CCDS2221.2      | chr2_164466775-164466775_G_T   | 523L>I  | Substitution | Nonsynonymous coding | 36% |
| MM12T | FIGN   | fidgetin                                                                     | CCDS2221.2      | chr2_164467326-164467326_C_T   | 339G>D  | Substitution | Nonsynonymous coding | 19% |
| MM12T | FIGN   | fidgetin                                                                     | CCDS2221.2      | chr2_164467354-164467354_C_T   | 330D>N  | Substitution | Nonsynonymous coding | 15% |
| MM12T | FIS1   | fission 1 (mitochondrial outer membrane homolog ( <i>S. cerevisiae</i> ))    | CCDS43626.1     | chr7_100883109-100883109_G_T   | 146A>D  | Substitution | Nonsynonymous coding | 40% |
| MM12T | FIZ1   | FLT3-interacting zinc finger 1                                               | CCDS12928.1     | chr19_56104078-56104078_C_T    | 410G>D  | Substitution | Nonsynonymous coding | 28% |
| MM12T | FKBP10 | FK506 binding protein 10, 65 kDa                                             | CCDS11409.1     | chr17_39975915-39975915_G_A    | 351E>K  | Substitution | Nonsynonymous coding | 18% |
| MM12T | FKBP5  | FK506 binding protein 5                                                      | CCDS4808.1      | chr6_35547913-35547913_G_A     | 309S>L  | Substitution | Nonsynonymous coding | 11% |
| MM12T | FKTN   | fukutin                                                                      | CCDS6766.1      | chr9_108363547-108363547_G_A   | 96G>D   | Substitution | Nonsynonymous coding | 34% |
| MM12T | FLAD1  | FAD1 flavin adenine dinucleotide synthetase homolog ( <i>S. cerevisiae</i> ) | CCDS1078.1      | chr1_154962651-154962651_C_T   | 428P>S  | Substitution | Nonsynonymous coding | 11% |
| MM12T | FLCN   | folliculin                                                                   | CCDS32579.1     | chr17_17125882-17125882_C_T    | 238A>T  | Substitution | Nonsynonymous coding | 36% |
| MM12T | FLCN   | folliculin                                                                   | CCDS32579.1     | chr17_17131403-17131403_G_A    | 17R>C   | Substitution | Nonsynonymous coding | 34% |
| MM12T | FLG2   | filaggrin family member 2                                                    | CCDS30861.1     | chr1_152325097-152325097_C_T   | 1722G>E | Substitution | Nonsynonymous coding | 14% |
| MM12T | FLII   | flightless I homolog ( <i>Drosophila</i> )                                   | CCDS11192.1     | chr17_18154755-18154755_G_A    | 474R>W  | Substitution | Nonsynonymous coding | 35% |
| MM12T | FLNA   | filamin A, alpha                                                             | CCDS48194.1     | chrX_153578116-153578116_C_T   | 2485V>I | Substitution | Nonsynonymous coding | 32% |
| MM12T | FLNA   | filamin A, alpha                                                             | CCDS48194.1     | chrX_153582400-153582400_G_A   | 1857Q>X | Substitution | Nonsense             | 36% |
| MM12T | FLNB   | filamin B, beta                                                              | CCDS2885.1      | chr3_57994398-57994398_G_A     | 36R>H   | Substitution | Nonsynonymous coding | 15% |
| MM12T | FLNB   | filamin B, beta                                                              | CCDS2885.1      | chr3_58155457-58155457_G_A     | 2520A>T | Substitution | Nonsynonymous coding | 38% |
| MM12T | FLNC   | filamin C, gamma                                                             | CCDS43644.1     | chr7_128488073-128488073_G_A   | 1511G>R | Substitution | Nonsynonymous coding | 33% |
| MM12T | FLNC   | filamin C, gamma                                                             | CCDS43644.1     | chr7_128493077-128493077_G_A   | 2067R>H | Substitution | Nonsynonymous coding | 15% |
| MM12T | FLT1   | fms-related tyrosine kinase 1                                                | CCDS9330.1      | chr13_28877407-28877407_C_T    | 1305R>H | Substitution | Nonsynonymous coding | 29% |
| MM12T | FLT1   | fms-related tyrosine kinase 1                                                | CCDS9330.1      | chr13_29001363-29001363_A_G    | 457Y>H  | Substitution | Nonsynonymous coding | 30% |
| MM12T | FLVCR1 | feline leukemia virus subgroup C cellular receptor 1                         | CCDS1510.1      | chr1_213032467-213032467_G_A   | 225A>T  | Substitution | Nonsynonymous coding | 26% |
| MM12T | FLVCR2 | feline leukemia virus subgroup C cellular receptor family, member 2          | CCDS9844.1      | chr14_76112789-76112789_A_G    | 519T>A  | Substitution | Nonsynonymous coding | 31% |
| MM12T | FMN2   | formin 2                                                                     | CCDS31069.2     | chr1_240255559-240255559_G_    | NA      | Deletion     | Frameshift           | 10% |
| MM12T | FMN2   | formin 2                                                                     | CCDS31069.2     | chr1_240255562-240255565_GGGA_ | NA      | Deletion     | Frameshift           | 49% |
| MM12T | FMNL3  | formin-like 3                                                                | CCDS44874.1     | chr12_50042017-50042017_C_A    | 879G>C  | Substitution | Nonsynonymous coding | 30% |
| MM12T | FMO3   | flavin containing monooxygenase 3                                            | CCDS1292.1      | chr1_171076877-171076877_C_T   | 128T>I  | Substitution | Nonsynonymous coding | 29% |
| MM12T | FMO3   | flavin containing monooxygenase 3                                            | CCDS1292.1      | chr1_171085413-171085413_C_T   | 417R>C  | Substitution | Nonsynonymous coding | 28% |
| MM12T | FMO6P  | flavin containing monooxygenase 6 pseudogene                                 | ENST00000236166 | chr1_171116837-171116837_G_T   | 186R>M  | Substitution | Nonsynonymous coding | 19% |
| MM12T | FNBP1  | formin binding protein 1                                                     | CCDS48040.1     | chr9_132665275-132665275_G_T   | 434A>D  | Substitution | Nonsynonymous coding | 18% |
| MM12T | FNBP1  | formin binding protein 1                                                     | CCDS48040.1     | chr9_132686176-132686176_C_T   | 373E>K  | Substitution | Nonsynonymous coding | 16% |
| MM12T | FNBP1  | formin binding protein 1                                                     | CCDS48040.1     | chr9_132741618-132741618_G_A   | 59S>L   | Substitution | Nonsynonymous coding | 45% |

|       |         |                                                   |                 |                               |         |              |                      |     |
|-------|---------|---------------------------------------------------|-----------------|-------------------------------|---------|--------------|----------------------|-----|
| MM12T | FNDC1   | fibronectin type III domain containing 1          | CCDS47512.1     | chr6_159654279-159654279_G_A  | 912S>N  | Substitution | Nonsynonymous coding | 48% |
| MM12T | FNDC3A  | fibronectin type III domain containing 3A         | CCDS41886.1     | chr13_49580426-49580426_G_A   | ISV+1>  | Substitution | Splice site donor    | 47% |
| MM12T | FNDC3B  | fibronectin type III domain containing 3B         | CCDS3217.1      | chr3_172060852-172060852_C_T  | 675R>X  | Substitution | Nonsense             | 22% |
| MM12T | FOLR3   | folate receptor 3 (gamma)                         | ENST00000456237 | chr11_71850829-71850829_C_T   | 273A>V  | Substitution | Nonsynonymous coding | 15% |
| MM12T | FOXD2   | forkhead box D2                                   | CCDS30708.1     | chr1_47904985-47904985_C_T    | 393T>M  | Substitution | Nonsynonymous coding | 31% |
| MM12T | FOXH1   | forkhead box H1                                   | CCDS6428.1      | chr8_145699929-145699929_G_A  | 264R>W  | Substitution | Nonsynonymous coding | 37% |
| MM12T | FOXK2   | forkhead box K2                                   | CCDS11813.1     | chr17_80521428-80521428_C_T   | ISV+4>  | Substitution | Splice site donor    | 36% |
| MM12T | FOXN4   | forkhead box N4                                   | CCDS9126.2      | chr12_109719446-109719446_G_T | 354L>M  | Substitution | Nonsynonymous coding | 28% |
| MM12T | FOXO6   | forkhead box O6                                   | ENST00000372591 | chr1_41847547-41847547_C_A    | 225P>H  | Substitution | Nonsynonymous coding | 15% |
| MM12T | FOXP4   | forkhead box P4                                   | CCDS34447.1     | chr6_41565529-41565529_C_T    | 579A>V  | Substitution | Nonsynonymous coding | 20% |
| MM12T | FOXRED2 | FAD-dependent oxidoreductase domain containing 2  | CCDS13929.1     | chr22_36892046-36892046_G_A   | 531P>L  | Substitution | Nonsynonymous coding | 27% |
| MM12T | FOX51   | forkhead box S1                                   | CCDS13192.1     | chr20_30433011-30433011_C_T   | 112R>H  | Substitution | Nonsynonymous coding | 28% |
| MM12T | FOX51   | forkhead box S1                                   | CCDS13192.1     | chr20_30433234-30433234_G_A   | 38R>W   | Substitution | Nonsynonymous coding | 10% |
| MM12T | FPR2    | formyl peptide receptor 2                         | CCDS12840.1     | chr19_52272465-52272465_G_A   | 185G>D  | Substitution | Nonsynonymous coding | 15% |
| MM12T | FPR3    | formyl peptide receptor 3                         | CCDS12841.1     | chr19_52327266-52327266_G_A   | 89E>K   | Substitution | Nonsynonymous coding | 15% |
| MM12T | FREM3   | FRAS1 related extracellular matrix 3              | NM_001168235    | chr4_144618638-144618638_G_T  | 1064P>H | Substitution | Nonsynonymous coding | 19% |
| MM12T | FRMD1   | FERM domain containing 1                          | CCDS5306.1      | chr6_168459818-168459818_C_T  | 465E>K  | Substitution | Nonsynonymous coding | 22% |
| MM12T | FRMD4B  | FERM domain containing 4B                         | CCDS46863.1     | chr3_69273803-69273803_G_A    | 207A>V  | Substitution | Nonsynonymous coding | 14% |
| MM12T | FRMPD1  | FERM and PDZ domain containing 1                  | CCDS6612.1      | chr9_37740128-37740128_G_A    | 535V>I  | Substitution | Nonsynonymous coding | 17% |
| MM12T | FRMPD1  | FERM and PDZ domain containing 1                  | CCDS6612.1      | chr9_37744832-37744832_G_A    | 935D>N  | Substitution | Nonsynonymous coding | 11% |
| MM12T | FRMPD3  | FERM and PDZ domain containing 3                  | ENST00000276185 | chrX_106840986-106840986_G_A  | 659R>H  | Substitution | Nonsynonymous coding | 15% |
| MM12T | FRMPD4  | FERM and PDZ domain containing 4                  | CCDS35201.1     | chrX_12734656-12734656_C_T    | 693A>V  | Substitution | Nonsynonymous coding | 15% |
| MM12T | FRMPD4  | FERM and PDZ domain containing 4                  | ENST00000429478 | chrX_12739340-12739340_C_T    | 1544A>V | Substitution | Nonsynonymous coding | 10% |
| MM12T | FRMPD4  | FERM and PDZ domain containing 4                  | CCDS35201.1     | chrX_12724996-12724996_C_T    | 417R>X  | Substitution | Nonsense             | 11% |
| MM12T | FRS2    | fibroblast growth factor receptor substrate 2     | CCDS41809.1     | chr12_69962862-69962862_C_T   | 18R>W   | Substitution | Nonsynonymous coding | 30% |
| MM12T | FRS3    | fibroblast growth factor receptor substrate 3     | CCDS4860.1      | chr6_41743271-41743271_G_T    | 47L>M   | Substitution | Nonsynonymous coding | 13% |
| MM12T | FRY     | furry homolog (Drosophila)                        | CCDS41875.1     | chr13_32709043-32709043_A_T   | 296E>D  | Substitution | Nonsynonymous coding | 47% |
| MM12T | FRYL    | FRY-like                                          | CCDS43227.1     | chr4_48548124-48548124_C_T    | 1747D>N | Substitution | Nonsynonymous coding | 21% |
| MM12T | FRYL    | FRY-like                                          | CCDS43227.1     | chr4_48611030-48611030_C_A    | 182E>D  | Substitution | Nonsynonymous coding | 30% |
| MM12T | FSCB    | fibrous sheath CABYR binding protein              | CCDS9679.1      | chr14_44975361-44975361_G_A   | 277A>V  | Substitution | Nonsynonymous coding | 19% |
| MM12T | FSD1    | fibronectin type III and SPRY domain containing 1 | CCDS12127.1     | chr19_4323108-4323108_G_A     | 389A>T  | Substitution | Nonsynonymous coding | 37% |
| MM12T | FSHR    | follicle stimulating hormone receptor             | CCDS1843.1      | chr2_49190291-49190291_G_A    | 557R>W  | Substitution | Nonsynonymous coding | 30% |

|       |         |                                                              |                 |                               |         |              |                      |     |
|-------|---------|--------------------------------------------------------------|-----------------|-------------------------------|---------|--------------|----------------------|-----|
| MM12T | FSIP2   | fibrous sheath interacting protein 2                         | ENST00000424728 | chr2_186653913-186653913_G_A  | 684D>N  | Substitution | Nonsynonymous coding | 37% |
| MM12T | FSTL1   | folliculin-like 1                                            | CCDS2998.1      | chr3_120123733-120123733_G_A  | 183T>M  | Substitution | Nonsynonymous coding | 30% |
| MM12T | FSTL5   | folliculin-like 5                                            | CCDS3802.1      | chr4_162307546-162307546_T_G  | 633T>P  | Substitution | Nonsynonymous coding | 31% |
| MM12T | FTSJ2   | FtsJ RNA methyltransferase homolog 2 (E. coli)               | CCDS5328.1      | chr7_2279133-2279133_C_T      | 73G>D   | Substitution | Nonsynonymous coding | 17% |
| MM12T | FUBP1   | far upstream element (FUSE) binding protein 1                | CCDS683.1       | chr1_78426092-78426092_C_T    | 478G>E  | Substitution | Nonsynonymous coding | 29% |
| MM12T | FUOM    | fucose mutarotase                                            | CCDS44499.1     | chr10_135169276-135169276_G_A | 122R>W  | Substitution | Nonsynonymous coding | 32% |
| MM12T | FURIN   | furin (paired basic amino acid cleaving enzyme)              | CCDS10364.1     | chr15_91421502-91421502_G_A   | 270A>T  | Substitution | Nonsynonymous coding | 29% |
| MM12T | FUS     | fused in sarcoma                                             | CCDS10707.1     | chr16_31201719-31201719_C_T   | 431P>L  | Substitution | Nonsynonymous coding | 60% |
| MM12T | FUT9    | fucosyltransferase 9 (alpha (1,3) fucosyltransferase)        | CCDS5033.1      | chr6_96651471-96651471_G_A    | 147G>D  | Substitution | Nonsynonymous coding | 10% |
| MM12T | FUZ     | fuzzy homolog (Drosophila)                                   | CCDS12781.1     | chr19_50312688-50312688_G_A   | 213P>S  | Substitution | Nonsynonymous coding | 30% |
| MM12T | FXR1    | fragile X mental retardation, autosomal homolog 1            | CCDS3238.1      | chr3_180666228-180666228_A_   | NA      | Deletion     | Frameshift           | 22% |
| MM12T | FYCO1   | FYVE and coiled-coil domain containing 1                     | CCDS2734.1      | chr3_46003775-46003775_G_T    | 1127L>M | Substitution | Nonsynonymous coding | 10% |
| MM12T | FYCO1   | FYVE and coiled-coil domain containing 1                     | CCDS2734.1      | chr3_46010057-46010057_C_T    | 257D>N  | Substitution | Nonsynonymous coding | 30% |
| MM12T | FZD2    | frizzled family receptor 2                                   | CCDS11484.1     | chr17_42636639-42636639_C_T   | 528T>M  | Substitution | Nonsynonymous coding | 20% |
| MM12T | FZD3    | frizzled family receptor 3                                   | CCDS6069.1      | chr8_28385058-28385058_C_T    | 261R>X  | Substitution | Nonsense             | 28% |
| MM12T | FZD4    | frizzled family receptor 4                                   | CCDS8279.1      | chr11_86663448-86663448_C_T   | 117C>Y  | Substitution | Nonsynonymous coding | 11% |
| MM12T | FZD7    | frizzled family receptor 7                                   | CCDS2351.1      | chr2_202901042-202901042_C_T  | 558R>C  | Substitution | Nonsynonymous coding | 31% |
| MM12T | FZD9    | frizzled family receptor 9                                   | CCDS5548.1      | chr7_72849295-72849295_C_T    | 320L>F  | Substitution | Nonsynonymous coding | 36% |
| MM12T | FZR1    | fizzy/cell division cycle 20 related 1 (Drosophila)          | CCDS45916.1     | chr19_3523009-3523009_C_T     | 8R>C    | Substitution | Nonsynonymous coding | 26% |
| MM12T | G6PC    | glucose-6-phosphatase, catalytic subunit                     | CCDS11446.1     | chr17_41063381-41063381_G_A   | 338V>I  | Substitution | Nonsynonymous coding | 40% |
| MM12T | GABBR1  | gamma-aminobutyric acid (GABA) B receptor, 1                 | CCDS4663.1      | chr6_29571468-29571468_C_T    | 913R>H  | Substitution | Nonsynonymous coding | 15% |
| MM12T | GABBR1  | gamma-aminobutyric acid (GABA) B receptor, 1                 | CCDS4663.1      | chr6_29581117-29581117_C_T    | 490R>H  | Substitution | Nonsynonymous coding | 25% |
| MM12T | GABBR1  | gamma-aminobutyric acid (GABA) B receptor, 1                 | CCDS4663.1      | chr6_29581168-29581168_G_A    | 473A>V  | Substitution | Nonsynonymous coding | 42% |
| MM12T | GABBR2  | gamma-aminobutyric acid (GABA) B receptor, 2                 | CCDS6736.1      | chr9_101052916-101052916_G_A  | 926R>C  | Substitution | Nonsynonymous coding | 36% |
| MM12T | GABPA   | GA binding protein transcription factor, alpha subunit 60kDa | CCDS13575.1     | chr21_27136614-27136614_C_T   | 299A>V  | Substitution | Nonsynonymous coding | 16% |
| MM12T | GABRA5  | gamma-aminobutyric acid (GABA) A receptor, alpha 5           | CCDS45194.1     | chr15_27182373-27182373_G_A   | 208G>S  | Substitution | Nonsynonymous coding | 28% |
| MM12T | GABRG2  | gamma-aminobutyric acid (GABA) A receptor, gamma 2           | CCDS47333.1     | chr5_161580117-161580117_C_T  | 431R>C  | Substitution | Nonsynonymous coding | 14% |
| MM12T | GABRP   | gamma-aminobutyric acid (GABA) A receptor, pi                | CCDS4375.1      | chr5_170216215-170216215_G_A  | 46A>T   | Substitution | Nonsynonymous coding | 17% |
| MM12T | GABRQ   | gamma-aminobutyric acid (GABA) A receptor, theta             | CCDS14707.1     | chrX_151818250-151818250_G_A  | 219G>E  | Substitution | Nonsynonymous coding | 31% |
| MM12T | GABRQ   | gamma-aminobutyric acid (GABA) A receptor, theta             | CCDS14707.1     | chrX_151806666-151806666_C_T  | 4R>X    | Substitution | Nonsense             | 43% |
| MM12T | GAL3ST1 | galactose-3-O-sulfotransferase 1                             | CCDS13879.1     | chr22_30951146-30951146_C_T   | 356A>T  | Substitution | Nonsynonymous coding | 10% |
| MM12T | GAL3ST1 | galactose-3-O-sulfotransferase 1                             | CCDS13879.1     | chr22_30951193-30951193_C_T   | 340R>H  | Substitution | Nonsynonymous coding | 12% |

|       |         |                                                                    |                 |                               |         |              |                      |     |
|-------|---------|--------------------------------------------------------------------|-----------------|-------------------------------|---------|--------------|----------------------|-----|
| MM12T | GAL3ST3 | galactose-3-O-sulfotransferase 3                                   | CCDS8128.1      | chr11_65810697-65810697_C_T   | 193A>T  | Substitution | Nonsynonymous coding | 30% |
| MM12T | GALNS   | galactosamine (N-acetyl)-6-sulfate sulfatase                       | CCDS10970.1     | chr16_88909176-88909176_C_T   | 61R>Q   | Substitution | Nonsynonymous coding | 28% |
| MM12T | GALNS   | galactosamine (N-acetyl)-6-sulfate sulfatase                       | CCDS10970.1     | chr16_88908359-88908359_C_A   | 89G>X   | Substitution | Nonsense             | 17% |
| MM12T | GALNT13 | UDP-N-acetyl-alpha-D-galactosamine:polypeptide N-                  | CCDS2199.1      | chr2_155158010-155158010_G_A  | 355G>D  | Substitution | Nonsynonymous coding | 11% |
| MM12T | GALNT15 | UDP-N-acetyl-alpha-D-galactosamine:polypeptide N-                  | CCDS33711.1     | chr3_16268882-16268882_C_T    | 599L>F  | Substitution | Nonsynonymous coding | 11% |
| MM12T | GALNT5  | UDP-N-acetyl-alpha-D-galactosamine:polypeptide N-                  | CCDS2203.1      | chr2_158114640-158114640_G_A  | 16A>T   | Substitution | Nonsynonymous coding | 12% |
| MM12T | GALNTL5 | UDP-N-acetyl-alpha-D-galactosamine:polypeptide N-                  | CCDS5929.1      | chr7_151704991-151704991_G_A  | 330D>N  | Substitution | Nonsynonymous coding | 33% |
| MM12T | GALR1   | galanin receptor 1                                                 | CCDS12012.1     | chr18_74962541-74962541_G_A   | 13A>T   | Substitution | Nonsynonymous coding | 35% |
| MM12T | GALR1   | galanin receptor 1                                                 | CCDS12012.1     | chr18_74962637-74962637_G_A   | 45A>T   | Substitution | Nonsynonymous coding | 24% |
| MM12T | GAN     | gigaxonin                                                          | CCDS10935.1     | chr16_81391505-81391505_G_A   | 314M>I  | Substitution | Nonsynonymous coding | 14% |
| MM12T | GANAB   | glucosidase, alpha; neutral AB                                     | CCDS41656.1     | chr11_62393913-62393913_C_T   | 862A>T  | Substitution | Nonsynonymous coding | 33% |
| MM12T | GAPVD1  | GTPase activating protein and VPS9 domains 1                       | CCDS35138.1     | chr9_128064582-128064582_G_A  | 169R>Q  | Substitution | Nonsynonymous coding | 34% |
| MM12T | GAPVD1  | GTPase activating protein and VPS9 domains 1                       | CCDS35138.1     | chr9_128094231-128094231_C_T  | 734R>C  | Substitution | Nonsynonymous coding | 26% |
| MM12T | GAPVD1  | GTPase activating protein and VPS9 domains 1                       | CCDS35138.1     | chr9_128118072-128118072_G_A  | 1330V>M | Substitution | Nonsynonymous coding | 21% |
| MM12T | GARS    | glycyl-tRNA synthetase                                             | CCDS43564.1     | chr7_30673444-30673444_G_A    | 730E>K  | Substitution | Nonsynonymous coding | 24% |
| MM12T | GATA1   | GATA binding protein 1 (globin transcription factor 1)             | CCDS14305.1     | chrX_48652263-48652263_A_C    | 312K>Q  | Substitution | Nonsynonymous coding | 31% |
| MM12T | GATA2   | GATA binding protein 2                                             | CCDS3049.1      | chr3_128204954-128204954_C_T  | 163A>T  | Substitution | Nonsynonymous coding | 21% |
| MM12T | GATAD2A | GATA zinc finger domain containing 2A                              | CCDS12402.2     | chr19_19603488-19603488_G_T   | 167Q>H  | Substitution | Nonsynonymous coding | 26% |
| MM12T | GATM    | glycine amidinotransferase (L-arginine:glycine amidinotransferase) | CCDS10122.1     | chr15_45668831-45668831_C_T   | 86A>T   | Substitution | Nonsynonymous coding | 28% |
| MM12T | GBF1    | golgi brefeldin A resistant guanine nucleotide exchange factor 1   | CCDS7533.1      | chr10_104126873-104126873_A_G | 821D>G  | Substitution | Nonsynonymous coding | 35% |
| MM12T | GBF1    | golgi brefeldin A resistant guanine nucleotide exchange factor 1   | CCDS7533.1      | chr10_104128983-104128983_C_T | 996P>S  | Substitution | Nonsynonymous coding | 10% |
| MM12T | GCAT    | glycine C-acetyltransferase                                        | CCDS13957.1     | chr22_38211217-38211217_G_A   | 221A>T  | Substitution | Nonsynonymous coding | 25% |
| MM12T | GCK     | glucokinase (hexokinase 4)                                         | CCDS5480.1      | chr7_44198674-44198674_G_T    | 16L>M   | Substitution | Nonsynonymous coding | 32% |
| MM12T | GCN1L1  | GCN1 general control of amino-acid synthesis 1-like 1 (yeast)      | CCDS41847.1     | chr12_120591147-120591147_C_T | 1311S>N | Substitution | Nonsynonymous coding | 28% |
| MM12T | GCN1L1  | GCN1 general control of amino-acid synthesis 1-like 1 (yeast)      | CCDS41847.1     | chr12_120594264-120594264_C_T | ISV+1>  | Substitution | Splice site donor    | 39% |
| MM12T | GDAP1   | ganglioside induced differentiation associated protein 1           | CCDS34911.1     | chr8_75263615-75263615_G_A    | 75G>E   | Substitution | Nonsynonymous coding | 15% |
| MM12T | GDF15   | growth differentiation factor 15                                   | CCDS12376.1     | chr19_18499506-18499506_C_A   | 230L>M  | Substitution | Nonsynonymous coding | 43% |
| MM12T | GDF5    | growth differentiation factor 5                                    | CCDS13254.1     | chr20_34022081-34022081_G_A   | 378R>X  | Substitution | Nonsense             | 16% |
| MM12T | GDPD4   | glycerophosphodiester phosphodiesterase domain containing 4        | ENST00000376217 | chr11_76928143-76928143_G_A   | 571P>S  | Substitution | Nonsynonymous coding | 28% |
| MM12T | GDPD4   | glycerophosphodiester phosphodiesterase domain containing 4        | CCDS8249.1      | chr11_76969574-76969574_G_A   | 241P>S  | Substitution | Nonsynonymous coding | 15% |
| MM12T | GDPD5   | glycerophosphodiester phosphodiesterase domain containing 5        | CCDS8238.1      | chr11_75168791-75168791_C_T   | 88V>I   | Substitution | Nonsynonymous coding | 27% |
| MM12T | GEMIN4  | gem (nuclear organelle) associated protein 4                       | CCDS45559.1     | chr17_650898-650898_G_T       | 129L>M  | Substitution | Nonsynonymous coding | 14% |

|       |            |                                              |             |                              |         |              |                      |     |
|-------|------------|----------------------------------------------|-------------|------------------------------|---------|--------------|----------------------|-----|
| MM12T | GEMIN5     | gem (nuclear organelle) associated protein 5 | CCDS4330.1  | chr5_154271012-154271012_G_A | 1351R>X | Substitution | Nonsense             | 36% |
| MM12T | gene110258 | -                                            | CCDS47277.1 | chr5_139266946-139266946_C_T | 284R>H  | Substitution | Nonsynonymous coding | 10% |
| MM12T | gene111969 | -                                            | CCDS47925.1 | chr8_143762846-143762846_C_T | 52R>C   | Substitution | Nonsynonymous coding | 14% |
| MM12T | gene111969 | -                                            | CCDS47925.1 | chr8_143763372-143763372_G_A | 65G>D   | Substitution | Nonsynonymous coding | 15% |
| MM12T | gene112101 | -                                            | CCDS47736.1 | chr7_144098144-144098144_C_T | 280R>H  | Substitution | Nonsynonymous coding | 32% |
| MM12T | gene112101 | -                                            | CCDS47736.1 | chr7_144099047-144099047_C_T | ISV-4>  | Substitution | Splice site acceptor | 31% |
| MM12T | gene113070 | -                                            | CCDS47498.1 | chr6_146978052-146978052_C_A | 183A>D  | Substitution | Nonsynonymous coding | 23% |
| MM12T | gene115326 | -                                            | CCDS48188.1 | chrX_152613366-152613366_G_A | 408S>N  | Substitution | Nonsynonymous coding | 14% |
| MM12T | gene119468 | -                                            | CCDS47160.1 | chr4_165981533-165981533_G_A | 412A>T  | Substitution | Nonsynonymous coding | 10% |
| MM12T | gene119844 | -                                            | CCDS47516.1 | chr6_168265307-168265307_G_A | 61R>Q   | Substitution | Nonsynonymous coding | 12% |
| MM12T | gene119844 | -                                            | CCDS47516.1 | chr6_168297651-168297651_A_G | 438Q>R  | Substitution | Nonsynonymous coding | 50% |
| MM12T | gene119844 | -                                            | CCDS47516.1 | chr6_168315863-168315863_C_T | 764T>M  | Substitution | Nonsynonymous coding | 38% |
| MM12T | gene119844 | -                                            | CCDS47516.1 | chr6_168276118-168276118_C_T | 227Q>X  | Substitution | Nonsense             | 39% |
| MM12T | gene13617  | -                                            | CCDS47950.1 | chr9_5968798-5968798_C_T     | 478G>D  | Substitution | Nonsynonymous coding | 23% |
| MM12T | gene18417  | -                                            | CCDS47541.1 | chr7_11091247-11091247_C_T   | 774S>L  | Substitution | Nonsynonymous coding | 46% |
| MM12T | gene20935  | -                                            | CCDS46766.1 | chr3_14537983-14537983_C_T   | 1020R>Q | Substitution | Nonsynonymous coding | 29% |
| MM12T | gene20935  | -                                            | CCDS46766.1 | chr3_14551344-14551344_G_A   | 786R>C  | Substitution | Nonsynonymous coding | 15% |
| MM12T | gene25924  | -                                            | CCDS44078.1 | chr1_20645133-20645133_C_T   | 254R>C  | Substitution | Nonsynonymous coding | 11% |
| MM12T | gene37297  | -                                            | CCDS45094.1 | chr14_31841108-31841108_C_A  | 330K>N  | Substitution | Nonsynonymous coding | 21% |
| MM12T | gene37297  | -                                            | CCDS45094.1 | chr14_31856490-31856490_G_A  | 49P>L   | Substitution | Nonsynonymous coding | 21% |
| MM12T | gene37652  | -                                            | CCDS47407.1 | chr6_32035444-32035444_C_T   | 2180V>I | Substitution | Nonsynonymous coding | 21% |
| MM12T | gene42698  | -                                            | CCDS46056.1 | chr19_36256027-36256027_C_T  | 240S>L  | Substitution | Nonsynonymous coding | 14% |
| MM12T | gene42698  | -                                            | CCDS46056.1 | chr19_36259082-36259082_C_T  | 416R>X  | Substitution | Nonsense             | 29% |
| MM12T | gene49600  | -                                            | CCDS45242.1 | chr15_42276814-42276814_G_T  | 707L>M  | Substitution | Nonsynonymous coding | 33% |
| MM12T | gene57233  | -                                            | CCDS46820.1 | chr3_47950975-47950975_A_G   | 253S>P  | Substitution | Nonsynonymous coding | 29% |
| MM12T | gene66631  | -                                            | CCDS47441.1 | chr6_56457095-56457095_G_T   | 2144A>D | Substitution | Nonsynonymous coding | 11% |
| MM12T | gene66631  | -                                            | CCDS47441.1 | chr6_56765370-56765370_G_A   | 89A>V   | Substitution | Nonsynonymous coding | 22% |
| MM12T | gene68399  | -                                            | CCDS45112.1 | chr14_58030900-58030900_G_A  | 507R>W  | Substitution | Nonsynonymous coding | 29% |
| MM12T | gene68399  | -                                            | CCDS45112.1 | chr14_58031047-58031047_C_T  | 458A>T  | Substitution | Nonsynonymous coding | 26% |
| MM12T | gene84609  | -                                            | CCDS44168.1 | chr1_85016132-85016132_G_T   | 403Q>H  | Substitution | Nonsynonymous coding | 10% |
| MM12T | gene86832  | -                                            | CCDS45551.1 | chr16_89723994-89723994_C_T  | 1M>I    | Substitution | Nonsynonymous coding | 30% |
| MM12T | gene87951  | -                                            | CCDS44706.1 | chr11_92498091-92498091_G_A  | 1344R>H | Substitution | Nonsynonymous coding | 56% |

|       |           |                                                                       |             |                               |         |              |                      |     |
|-------|-----------|-----------------------------------------------------------------------|-------------|-------------------------------|---------|--------------|----------------------|-----|
| MM12T | gene87951 | -                                                                     | CCDS44706.1 | chr11_92531331-92531331_C_T   | 1718P>S | Substitution | Nonsynonymous coding | 29% |
| MM12T | gene87951 | -                                                                     | CCDS44706.1 | chr11_92616148-92616148_C_T   | 4176R>C | Substitution | Nonsynonymous coding | 32% |
| MM12T | gene98833 | -                                                                     | CCDS44978.1 | chr12_112708248-112708248_G_A | 221T>M  | Substitution | Nonsynonymous coding | 11% |
| MM12T | GFAP      | glial fibrillary acidic protein                                       | CCDS11491.1 | chr17_42989078-42989078_G_A   | 290Q>X  | Substitution | Nonsense             | 36% |
| MM12T | GFPT2     | glutamine-fructose-6-phosphate transaminase 2                         | CCDS43411.1 | chr5_179743820-179743820_G_A  | 366R>X  | Substitution | Nonsense             | 28% |
| MM12T | GFRA1     | GDNF family receptor alpha 1                                          | CCDS44481.1 | chr10_118030591-118030591_C_T | 26R>H   | Substitution | Nonsynonymous coding | 29% |
| MM12T | GGA3      | golgi-associated, gamma adaptin ear containing, ARF binding protein 3 | CCDS11717.1 | chr17_73235147-73235147_T_G   | 600T>P  | Substitution | Nonsynonymous coding | 50% |
| MM12T | GGA3      | golgi-associated, gamma adaptin ear containing, ARF binding protein 3 | CCDS11717.1 | chr17_73236050-73236050_G_T   | 468P>H  | Substitution | Nonsynonymous coding | 18% |
| MM12T | GGN       | gametogenetin                                                         | CCDS12516.1 | chr19_38877535-38877535_G_A   | 123R>C  | Substitution | Nonsynonymous coding | 23% |
| MM12T | GHSR      | growth hormone secretagogue receptor                                  | CCDS3218.1  | chr3_172163105-172163105_G_A  | 316A>V  | Substitution | Nonsynonymous coding | 34% |
| MM12T | GID4      | GID complex subunit 4, VID24 homolog (S. cerevisiae)                  | CCDS11190.1 | chr17_17965214-17965214_C_T   | 255A>V  | Substitution | Nonsynonymous coding | 27% |
| MM12T | GIGYF1    | GRB10 interacting GYF protein 1                                       | CCDS34708.1 | chr7_100280085-100280085_G_A  | 874S>L  | Substitution | Nonsynonymous coding | 26% |
| MM12T | GIGYF1    | GRB10 interacting GYF protein 1                                       | CCDS34708.1 | chr7_100281911-100281911_G_A  | 560A>V  | Substitution | Nonsynonymous coding | 34% |
| MM12T | GIMAP8    | GTPase, IMAP family member 8                                          | CCDS34777.1 | chr7_150171186-150171186_G_A  | 257G>S  | Substitution | Nonsynonymous coding | 30% |
| MM12T | GJA3      | gap junction protein, alpha 3, 46kDa                                  | CCDS9289.1  | chr13_20716779-20716779_G_A   | 217L>F  | Substitution | Nonsynonymous coding | 28% |
| MM12T | GJA5      | gap junction protein, alpha 5, 40kDa                                  | CCDS929.1   | chr1_147230328-147230328_T_C  | 340D>G  | Substitution | Nonsynonymous coding | 34% |
| MM12T | GJA5      | gap junction protein, alpha 5, 40kDa                                  | CCDS929.1   | chr1_147230701-147230701_C_T  | 216A>T  | Substitution | Nonsynonymous coding | 35% |
| MM12T | GJA5      | gap junction protein, alpha 5, 40kDa                                  | CCDS929.1   | chr1_147231031-147231031_G_A  | 106R>C  | Substitution | Nonsynonymous coding | 36% |
| MM12T | GJA9      | gap junction protein, alpha 9, 59kDa                                  | CCDS432.1   | chr1_39340248-39340248_C_T    | 508R>Q  | Substitution | Nonsynonymous coding | 27% |
| MM12T | GJB7      | gap junction protein, beta 7, 25kDa                                   | CCDS5008.1  | chr6_87993986-87993986_T_A    | 215L>F  | Substitution | Nonsynonymous coding | 15% |
| MM12T | GKN2      | gastrokine 2                                                          | CCDS33215.1 | chr2_69177317-69177317_C_T    | 49A>T   | Substitution | Nonsynonymous coding | 11% |
| MM12T | GLA       | galactosidase, alpha                                                  | CCDS14484.1 | chrX_100653866-100653866_C_T  | 236W>X  | Substitution | Nonsense             | 31% |
| MM12T | GLB1L3    | galactosidase, beta 1-like 3                                          | CCDS44780.1 | chr11_134151966-134151966_G_A | 160R>H  | Substitution | Nonsynonymous coding | 21% |
| MM12T | GLE1      | GLE1 RNA export mediator homolog (yeast)                              | CCDS35154.1 | chr9_131295863-131295863_C_T  | 462R>C  | Substitution | Nonsynonymous coding | 10% |
| MM12T | GLI2      | GLI family zinc finger 2                                              | CCDS33283.1 | chr2_121740331-121740331_C_A  | 520L>M  | Substitution | Nonsynonymous coding | 35% |
| MM12T | GLI2      | GLI family zinc finger 2                                              | CCDS33283.1 | chr2_121746078-121746078_C_T  | 863S>L  | Substitution | Nonsynonymous coding | 23% |
| MM12T | GLI3      | GLI family zinc finger 3                                              | CCDS5465.1  | chr7_42012096-42012096_G_T    | 648P>H  | Substitution | Nonsynonymous coding | 29% |
| MM12T | GLIS3     | GLIS family zinc finger 3                                             | CCDS43784.1 | chr9_4286193-4286193_C_T      | 78R>H   | Substitution | Nonsynonymous coding | 10% |
| MM12T | GLP1R     | glucagon-like peptide 1 receptor                                      | CCDS4839.1  | chr6_39040654-39040654_A_T    | 176R>W  | Substitution | Nonsynonymous coding | 26% |
| MM12T | GLP1R     | glucagon-like peptide 1 receptor                                      | CCDS4839.1  | chr6_39046907-39046907_T_G    | 325V>G  | Substitution | Nonsynonymous coding | 21% |
| MM12T | GLP2R     | glucagon-like peptide 2 receptor                                      | CCDS11150.1 | chr17_9792882-9792882_C_T     | 508R>X  | Substitution | Nonsense             | 33% |
| MM12T | GLS       | glutaminase                                                           | CCDS2308.1  | chr2_191760355-191760355_C_T  | 170T>M  | Substitution | Nonsynonymous coding | 22% |

|       |         |                                                                                                  |                 |                               |        |              |                      |     |
|-------|---------|--------------------------------------------------------------------------------------------------|-----------------|-------------------------------|--------|--------------|----------------------|-----|
| MM12T | GLS2    | glutaminase 2 (liver, mitochondrial)                                                             | CCDS8921.1      | chr12_56865926-56865926_G_T   | 522A>D | Substitution | Nonsynonymous coding | 28% |
| MM12T | GLT8D1  | glycosyltransferase 8 domain containing 1                                                        | CCDS2862.1      | chr3_52734353-52734353_C_T    | 14A>T  | Substitution | Nonsynonymous coding | 20% |
| MM12T | GLTP    | glycolipid transfer protein                                                                      | CCDS9136.1      | chr12_110293489-110293489_C_T | 128A>T | Substitution | Nonsynonymous coding | 12% |
| MM12T | GLTSCR1 | glioma tumor suppressor candidate region gene 1                                                  | CCDS46134.1     | chr19_48183629-48183629_C_T   | 401A>V | Substitution | Nonsynonymous coding | 11% |
| MM12T | GLTSCR2 | glioma tumor suppressor candidate region gene 2                                                  | CCDS12705.1     | chr19_48258120-48258120_G_A   | 342R>Q | Substitution | Nonsynonymous coding | 30% |
| MM12T | GMEB2   | glucocorticoid modulatory element binding protein 2                                              | CCDS13528.1     | chr20_62223494-62223494_G_T   | 278A>D | Substitution | Nonsynonymous coding | 12% |
| MM12T | GMEB2   | glucocorticoid modulatory element binding protein 2                                              | CCDS13528.1     | chr20_62250746-62250746_G_A   | 2A>V   | Substitution | Nonsynonymous coding | 15% |
| MM12T | GMPPB   | GDP-mannose pyrophosphorylase B                                                                  | CCDS2802.1      | chr3_49759931-49759931_A_G    | 192S>P | Substitution | Nonsynonymous coding | 11% |
| MM12T | GMPR    | guanosine monophosphate reductase                                                                | CCDS4537.1      | chr6_16290836-16290836_G_T    | 281G>X | Substitution | Nonsense             | 27% |
| MM12T | GNA12   | guanine nucleotide binding protein (G protein) alpha 12                                          | CCDS5335.1      | chr7_2834770-2834770_C_A      | 106R>M | Substitution | Nonsynonymous coding | 34% |
| MM12T | GNA13   | guanine nucleotide binding protein (G protein), alpha 13                                         | CCDS11661.1     | chr17_63010545-63010545_C_T   | 322V>I | Substitution | Nonsynonymous coding | 13% |
| MM12T | GNAI2   | guanine nucleotide binding protein (G protein), alpha inhibiting activity polypeptide 2          | CCDS2813.1      | chr3_50290538-50290538_G_A    | 129R>Q | Substitution | Nonsynonymous coding | 30% |
| MM12T | GNAL    | guanine nucleotide binding protein (G protein), alpha activating activity polypeptide, olfactory | CCDS11851.1     | chr18_11880989-11880989_G_T   | 411R>M | Substitution | Nonsynonymous coding | 33% |
| MM12T | GNAO1   | guanine nucleotide binding protein (G protein), alpha activating activity polypeptide O          | CCDS10756.1     | chr16_56226510-56226510_C_T   | 48T>I  | Substitution | Nonsynonymous coding | 20% |
| MM12T | GNAQ    | guanine nucleotide binding protein (G protein), q polypeptide                                    | CCDS6658.1      | chr9_80537237-80537237_G_A    | 54T>M  | Substitution | Nonsynonymous coding | 11% |
| MM12T | GNAS    | GNAS complex locus                                                                               | CCDS46622.1     | chr20_57430289-57430289_G_A   | 657A>T | Substitution | Nonsynonymous coding | 33% |
| MM12T | GNAT3   | guanine nucleotide binding protein, alpha transducing 3                                          | CCDS47625.1     | chr7_80088000-80088000_C_T    | 351C>Y | Substitution | Nonsynonymous coding | 24% |
| MM12T | GNB1L   | guanine nucleotide binding protein (G protein), beta polypeptide 1-like                          | CCDS13768.1     | chr22_19776480-19776480_G_A   | 246R>C | Substitution | Nonsynonymous coding | 11% |
| MM12T | GNB4    | guanine nucleotide binding protein (G protein), beta polypeptide 4                               | CCDS3230.1      | chr3_179131551-179131551_C_T  | 150R>H | Substitution | Nonsynonymous coding | 29% |
| MM12T | GNL1    | guanine nucleotide binding protein-like 1                                                        | CCDS4680.1      | chr6_30515230-30515230_C_T    | 393G>S | Substitution | Nonsynonymous coding | 20% |
| MM12T | GNL2    | guanine nucleotide binding protein-like 2 (nucleolar)                                            | CCDS421.1       | chr1_38041276-38041276_G_A    | 355R>C | Substitution | Nonsynonymous coding | 23% |
| MM12T | GNPTG   | N-acetylglucosamine-1-phosphate transferase, gamma subunit                                       | CCDS10436.1     | chr16_1411778-1411778_C_A     | 71C>X  | Substitution | Nonsense             | 29% |
| MM12T | GOLGA2B | -                                                                                                | ENST00000397112 | chr19_22785154-22785154_G_A   | 33R>H  | Substitution | Nonsynonymous coding | 26% |
| MM12T | GOLGA2B | -                                                                                                | ENST00000397112 | chr19_22785696-22785696_C_T   | ISV+3> | Substitution | Splice site donor    | 31% |
| MM12T | GOLGA4  | golgin A4                                                                                        | CCDS2666.1      | chr3_37365590-37365590_G_A    | 738S>N | Substitution | Nonsynonymous coding | 12% |
| MM12T | GOLGA4  | golgin A4                                                                                        | CCDS2666.1      | chr3_37366217-37366217_C_T    | 947T>I | Substitution | Nonsynonymous coding | 11% |
| MM12T | GOLGA5  | golgin A5                                                                                        | CCDS9905.1      | chr14_93264290-93264290_A_G   | 170T>A | Substitution | Nonsynonymous coding | 24% |
| MM12T | GOLIM4  | golgi integral membrane protein 4                                                                | CCDS3204.1      | chr3_167747752-167747752_C_T  | 417A>T | Substitution | Nonsynonymous coding | 29% |
| MM12T | GOLM1   | golgi membrane protein 1                                                                         | CCDS35054.1     | chr9_88694216-88694216_C_T    | 7G>E   | Substitution | Nonsynonymous coding | 28% |
| MM12T | GOLT1A  | golgi transport 1A                                                                               | CCDS1443.1      | chr1_204172119-204172119_C_T  | ISV-4> | Substitution | Splice site acceptor | 11% |
| MM12T | GON4L   | gon-4-like (C. elegans)                                                                          | CCDS44242.1     | chr1_155823199-155823199_C_T  | 125A>T | Substitution | Nonsynonymous coding | 37% |
| MM12T | GOPC    | golgi-associated PDZ and coiled-coil motif containing                                            | CCDS5117.1      | chr6_117894670-117894670_C_T  | 259R>H | Substitution | Nonsynonymous coding | 34% |

|       |          |                                                                      |                 |                               |         |              |                      |     |
|-------|----------|----------------------------------------------------------------------|-----------------|-------------------------------|---------|--------------|----------------------|-----|
| MM12T | GOT1L1   | glutamic-oxaloacetic transaminase 1-like 1                           | CCDS47839.1     | chr8_37791834-37791834_T_     | NA      | Deletion     | Frameshift           | 48% |
| MM12T | GP6      | glycoprotein VI (platelet)                                           | CCDS42626.1     | chr19_55530062-55530062_C_T   | 228A>T  | Substitution | Nonsynonymous coding | 31% |
| MM12T | GPAT2    | glycerol-3-phosphate acyltransferase 2, mitochondrial                | CCDS42714.1     | chr2_96688929-96688929_G_A    | 692R>C  | Substitution | Nonsynonymous coding | 12% |
| MM12T | GPATCH2L | G patch domain containing 2-like                                     | CCDS9848.1      | chr14_76620840-76620840_G_A   | 45R>Q   | Substitution | Nonsynonymous coding | 29% |
| MM12T | GPATCH8  | G patch domain containing 8                                          | CCDS32666.1     | chr17_42478532-42478532_C_T   | 305A>T  | Substitution | Nonsynonymous coding | 16% |
| MM12T | GPBAR1   | G protein-coupled bile acid receptor 1                               | CCDS46515.1     | chr2_219128007-219128007_G_A  | 187R>H  | Substitution | Nonsynonymous coding | 15% |
| MM12T | GPBP1    | GC-rich promoter binding protein 1                                   | CCDS47212.1     | chr5_56546850-56546850_G_A    | 368D>N  | Substitution | Nonsynonymous coding | 39% |
| MM12T | GPC5     | glypican 5                                                           | CCDS9468.1      | chr13_92101096-92101096_G_A   | 82R>H   | Substitution | Nonsynonymous coding | 11% |
| MM12T | GPCPD1   | glycerophosphocholine phosphodiesterase GDE1 homolog (S. cerevisiae) | CCDS13090.1     | chr20_5559103-5559103_G_A     | 210Q>X  | Substitution | Nonsense             | 41% |
| MM12T | GPD1L    | glycerol-3-phosphate dehydrogenase 1-like                            | CCDS33729.1     | chr3_32201136-32201136_G_A    | 310R>H  | Substitution | Nonsynonymous coding | 29% |
| MM12T | GPI      | glucose-6-phosphate isomerase                                        | ENST00000392234 | chr19_34856357-34856357_G_T   | 65G>W   | Substitution | Nonsynonymous coding | 39% |
| MM12T | GPKOW    | G patch domain and KOW motifs                                        | CCDS35251.1     | chrX_48973481-48973481_C_T    | 272M>I  | Substitution | Nonsynonymous coding | 26% |
| MM12T | GPLD1    | glycosylphosphatidylinositol specific phospholipase D1               | CCDS4553.1      | chr6_24454346-24454346_A_T    | 411I>N  | Substitution | Nonsynonymous coding | 21% |
| MM12T | GPR108   | G protein-coupled receptor 108                                       | CCDS42479.1     | chr19_6732305-6732305_T_G     | 365K>T  | Substitution | Nonsynonymous coding | 32% |
| MM12T | GPR112   | G protein-coupled receptor 112                                       | CCDS35409.1     | chrX_135432533-135432533_C_T  | 2223S>F | Substitution | Nonsynonymous coding | 12% |
| MM12T | GPR112   | G protein-coupled receptor 112                                       | CCDS35409.1     | chrX_135455155-135455155_C_T  | 2570R>W | Substitution | Nonsynonymous coding | 20% |
| MM12T | GPR113   | G protein-coupled receptor 113                                       | CCDS46239.1     | chr2_26533093-26533093_G_T    | 1017L>I | Substitution | Nonsynonymous coding | 36% |
| MM12T | GPR114   | G protein-coupled receptor 114                                       | CCDS10785.1     | chr16_57601943-57601943_G_T   | 333A>S  | Substitution | Nonsynonymous coding | 16% |
| MM12T | GPR114   | G protein-coupled receptor 114                                       | CCDS10785.1     | chr16_57604375-57604375_C_T   | 379S>L  | Substitution | Nonsynonymous coding | 39% |
| MM12T | GPR115   | G protein-coupled receptor 115                                       | CCDS4922.2      | chr6_47682266-47682266_C_T    | 429R>W  | Substitution | Nonsynonymous coding | 22% |
| MM12T | GPR116   | G protein-coupled receptor 116                                       | CCDS4919.1      | chr6_46830795-46830795_C_T    | 677G>R  | Substitution | Nonsynonymous coding | 23% |
| MM12T | GPR123   | G protein-coupled receptor 123                                       | CCDS41580.1     | chr10_134916342-134916342_C_T | 133L>F  | Substitution | Nonsynonymous coding | 28% |
| MM12T | GPR125   | G protein-coupled receptor 125                                       | CCDS33964.1     | chr4_22390451-22390451_C_T    | 948R>H  | Substitution | Nonsynonymous coding | 22% |
| MM12T | GPR126   | G protein-coupled receptor 126                                       | CCDS47489.1     | chr6_142736136-142736136_G_A  | 858A>T  | Substitution | Nonsynonymous coding | 35% |
| MM12T | GPR128   | G protein-coupled receptor 128                                       | CCDS2938.1      | chr3_100413627-100413627_G_A  | 726V>I  | Substitution | Nonsynonymous coding | 11% |
| MM12T | GPR135   | G protein-coupled receptor 135                                       | CCDS9738.1      | chr14_59931026-59931026_A_G   | 307S>P  | Substitution | Nonsynonymous coding | 19% |
| MM12T | GPR142   | G protein-coupled receptor 142                                       | CCDS11698.1     | chr17_72368117-72368117_G_A   | 256R>H  | Substitution | Nonsynonymous coding | 12% |
| MM12T | GPR144   | G protein-coupled receptor 144                                       | CCDS48016.1     | chr9_127215368-127215368_C_T  | 131A>V  | Substitution | Nonsynonymous coding | 11% |
| MM12T | GPR148   | G protein-coupled receptor 148                                       | CCDS2163.1      | chr2_131487232-131487232_G_A  | 170A>T  | Substitution | Nonsynonymous coding | 36% |
| MM12T | GPR15    | G protein-coupled receptor 15                                        | CCDS2931.1      | chr3_98251002-98251002_C_A    | 42A>D   | Substitution | Nonsynonymous coding | 25% |
| MM12T | GPR152   | G protein-coupled receptor 152                                       | CCDS8165.1      | chr11_67218934-67218934_G_T   | 421S>Y  | Substitution | Nonsynonymous coding | 35% |
| MM12T | GPR153   | G protein-coupled receptor 153                                       | CCDS64.1        | chr1_6313863-6313863_T_A      | 234E>V  | Substitution | Nonsynonymous coding | 32% |



|       |         |                                                                 |                 |                               |         |              |                      |     |
|-------|---------|-----------------------------------------------------------------|-----------------|-------------------------------|---------|--------------|----------------------|-----|
| MM12T | GPR155  | G protein-coupled receptor 155                                  | CCDS2259.1      | chr2_175333696-175333696_C_T  | 376A>T  | Substitution | Nonsynonymous coding | 25% |
| MM12T | GPR158  | G protein-coupled receptor 158                                  | CCDS31166.1     | chr10_25464743-25464743_G_A   | 132A>T  | Substitution | Nonsynonymous coding | 10% |
| MM12T | GPR158  | G protein-coupled receptor 158                                  | CCDS31166.1     | chr10_25887532-25887532_G_T   | 993G>C  | Substitution | Nonsynonymous coding | 21% |
| MM12T | GPR158  | G protein-coupled receptor 158                                  | CCDS31166.1     | chr10_25883328-25883328_T_C   | ISV+2>  | Substitution | Splice site donor    | 14% |
| MM12T | GPR171  | G protein-coupled receptor 171                                  | CCDS3155.1      | chr3_150916578-150916578_T_A  | 199N>I  | Substitution | Nonsynonymous coding | 41% |
| MM12T | GPR179  | G protein-coupled receptor 179                                  | CCDS42308.1     | chr17_36483547-36483547_C_T   | 1969V>I | Substitution | Nonsynonymous coding | 36% |
| MM12T | GPR19   | G protein-coupled receptor 19                                   | CCDS8652.1      | chr12_12814265-12814265_C_T   | 373G>D  | Substitution | Nonsynonymous coding | 11% |
| MM12T | GPR26   | G protein-coupled receptor 26                                   | CCDS7636.1      | chr10_125426537-125426537_G_A | 205R>H  | Substitution | Nonsynonymous coding | 16% |
| MM12T | GPR37   | G protein-coupled receptor 37 (endothelin receptor type B-like) | CCDS5792.1      | chr7_124387270-124387270_G_A  | 384A>V  | Substitution | Nonsynonymous coding | 35% |
| MM12T | GPR39   | G protein-coupled receptor 39                                   | CCDS2170.1      | chr2_133175356-133175356_G_T  | 247Q>H  | Substitution | Nonsynonymous coding | 39% |
| MM12T | GPR4    | G protein-coupled receptor 4                                    | CCDS12669.1     | chr19_46094809-46094809_C_T   | 106A>T  | Substitution | Nonsynonymous coding | 35% |
| MM12T | GPR42   | G protein-coupled receptor 42 (gene/pseudogene)                 | ENST00000246538 | chr19_35862398-35862398_G_A   | 46R>H   | Substitution | Nonsynonymous coding | 28% |
| MM12T | GPR68   | G protein-coupled receptor 68                                   | CCDS9894.1      | chr14_91700710-91700710_G_T   | 239L>M  | Substitution | Nonsynonymous coding | 40% |
| MM12T | GPR78   | G protein-coupled receptor 78                                   | CCDS3403.1      | chr4_8588803-8588803_G_A      | 269V>I  | Substitution | Nonsynonymous coding | 36% |
| MM12T | GPR98   | G protein-coupled receptor 98                                   | CCDS47246.1     | chr5_90106505-90106505_C_T    | 5143A>V | Substitution | Nonsynonymous coding | 11% |
| MM12T | GPR98   | G protein-coupled receptor 98                                   | CCDS47246.1     | chr5_90144541-90144541_C_T    | 5703R>C | Substitution | Nonsynonymous coding | 13% |
| MM12T | GPRASP1 | G protein-coupled receptor associated sorting protein 1         | CCDS35352.1     | chrX_101909158-101909158_C_T  | 106S>F  | Substitution | Nonsynonymous coding | 32% |
| MM12T | GPRASP1 | G protein-coupled receptor associated sorting protein 1         | CCDS35352.1     | chrX_101909765-101909765_G_A  | 308W>X  | Substitution | Nonsense             | 24% |
| MM12T | GPRC5B  | G protein-coupled receptor, family C, group 5, member B         | CCDS10581.1     | chr16_19883725-19883725_C_T   | 148R>Q  | Substitution | Nonsynonymous coding | 35% |
| MM12T | GPRC5B  | G protein-coupled receptor, family C, group 5, member B         | CCDS10581.1     | chr16_19883777-19883777_C_T   | 131V>I  | Substitution | Nonsynonymous coding | 28% |
| MM12T | GPRC6A  | G protein-coupled receptor, family C, group 6, member A         | CCDS5112.1      | chr6_117114231-117114231_G_T  | 619L>M  | Substitution | Nonsynonymous coding | 32% |
| MM12T | GPRIN2  | G protein regulated inducer of neurite outgrowth 2              | CCDS31192.1     | chr10_46999125-46999125_C_T   | 82A>V   | Substitution | Nonsynonymous coding | 12% |
| MM12T | GPRIN3  | GPRIN family member 3                                           | CCDS34030.1     | chr4_90170792-90170792_C_A    | 157R>I  | Substitution | Nonsynonymous coding | 28% |
| MM12T | GPSM1   | G-protein signaling modulator 1                                 | CCDS48055.1     | chr9_139233032-139233032_G_A  | 280R>Q  | Substitution | Nonsynonymous coding | 28% |
| MM12T | GPSM2   | G-protein signaling modulator 2                                 | CCDS792.2       | chr1_109472453-109472453_T_G  | 649L>R  | Substitution | Nonsynonymous coding | 31% |
| MM12T | GPX4    | glutathione peroxidase 4                                        | CCDS42457.1     | chr19_1105213-1105213_C_T     | 38A>V   | Substitution | Nonsynonymous coding | 30% |
| MM12T | GRAMD2  | GRAM domain containing 2                                        | CCDS32283.1     | chr15_72455745-72455745_G_A   | 273A>V  | Substitution | Nonsynonymous coding | 29% |
| MM12T | GRAMD4  | GRAM domain containing 4                                        | CCDS33672.1     | chr22_47073086-47073086_G_A   | 559E>K  | Substitution | Nonsynonymous coding | 10% |
| MM12T | GREB1   | growth regulation by estrogen in breast cancer 1                | CCDS42655.1     | chr2_11750918-11750918_C_T    | 924T>M  | Substitution | Nonsynonymous coding | 31% |
| MM12T | GREB1   | growth regulation by estrogen in breast cancer 1                | CCDS42655.1     | chr2_11755296-11755296_G_A    | 1068A>T | Substitution | Nonsynonymous coding | 14% |
| MM12T | GREB1L  | growth regulation by estrogen in breast cancer-like             | CCDS45836.1     | chr18_19088427-19088427_C_A   | 1537A>D | Substitution | Nonsynonymous coding | 35% |
| MM12T | GRIA1   | glutamate receptor, ionotropic, AMPA 1                          | CCDS4322.1      | chr5_153026599-153026599_C_T  | 111P>L  | Substitution | Nonsynonymous coding | 27% |

|       |         |                                                               |             |                               |         |              |                      |     |
|-------|---------|---------------------------------------------------------------|-------------|-------------------------------|---------|--------------|----------------------|-----|
| MM12T | GRIA3   | glutamate receptor, ionotropic, AMPA 3                        | NM_000828   | chrX_122538652-122538652_G_A  | 463A>T  | Substitution | Nonsynonymous coding | 21% |
| MM12T | GRID1   | glutamate receptor, ionotropic, delta 1                       | CCDS1236.1  | chr10_87628938-87628938_C_A   | ISV-1>  | Substitution | Splice site acceptor | 29% |
| MM12T | GRIK3   | glutamate receptor, ionotropic, kainate 3                     | CCDS416.1   | chr1_37319298-37319298_C_T    | 377R>Q  | Substitution | Nonsynonymous coding | 11% |
| MM12T | GRIK3   | glutamate receptor, ionotropic, kainate 3                     | CCDS416.1   | chr11_37324816-37324816_C_T   | 333V>M  | Substitution | Nonsynonymous coding | 11% |
| MM12T | GRIK4   | glutamate receptor, ionotropic, kainate 4                     | CCDS8433.1  | chr11_120827539-120827539_G_A | 584C>Y  | Substitution | Nonsynonymous coding | 28% |
| MM12T | GRIN1   | glutamate receptor, ionotropic, N-methyl D-aspartate 1        | CCDS7031.1  | chr9_140034149-140034149_G_A  | 71A>T   | Substitution | Nonsynonymous coding | 29% |
| MM12T | GRIN1   | glutamate receptor, ionotropic, N-methyl D-aspartate 1        | CCDS7031.1  | chr9_140059693-140059693_C_T  | 882A>V  | Substitution | Nonsynonymous coding | 30% |
| MM12T | GRIN2A  | glutamate receptor, ionotropic, N-methyl D-aspartate 2A       | CCDS10539.1 | chr16_9943797-9943797_T_C     | 382T>A  | Substitution | Nonsynonymous coding | 34% |
| MM12T | GRIN2A  | glutamate receptor, ionotropic, N-methyl D-aspartate 2A       | CCDS10539.1 | chr16_10274037-10274037_C_T   | 78D>N   | Substitution | Nonsynonymous coding | 31% |
| MM12T | GRIN2B  | glutamate receptor, ionotropic, N-methyl D-aspartate 2B       | CCDS8662.1  | chr12_13716489-13716489_G_A   | 1228T>M | Substitution | Nonsynonymous coding | 32% |
| MM12T | GRIN2B  | glutamate receptor, ionotropic, N-methyl D-aspartate 2B       | CCDS8662.1  | chr12_13724822-13724822_C_T   | 696R>H  | Substitution | Nonsynonymous coding | 38% |
| MM12T | GRIN2D  | glutamate receptor, ionotropic, N-methyl D-aspartate 2D       | CCDS12719.1 | chr19_48908447-48908447_C_T   | 308R>C  | Substitution | Nonsynonymous coding | 31% |
| MM12T | GRIPAP1 | GRIP1 associated protein 1                                    | CCDS35248.1 | chrX_48847125-48847125_G_A    | 221T>I  | Substitution | Nonsynonymous coding | 33% |
| MM12T | GRK1    | G protein-coupled receptor kinase 1                           | NM_002929   | chr13_114322315-114322315_C_T | 205S>L  | Substitution | Nonsynonymous coding | 36% |
| MM12T | GRK6    | G protein-coupled receptor kinase 6                           | CCDS47348.1 | chr5_176858998-176858998_C_T  | 51R>C   | Substitution | Nonsynonymous coding | 47% |
| MM12T | GRK6    | G protein-coupled receptor kinase 6                           | CCDS47348.1 | chr5_176860543-176860543_G_A  | 202A>T  | Substitution | Nonsynonymous coding | 10% |
| MM12T | GRK6    | G protein-coupled receptor kinase 6                           | CCDS47348.1 | chr5_176863154-176863154_G_A  | 380A>T  | Substitution | Nonsynonymous coding | 12% |
| MM12T | GRK6    | G protein-coupled receptor kinase 6                           | CCDS47348.1 | chr5_176867941-176867941_C_T  | 522Q>X  | Substitution | Nonsense             | 32% |
| MM12T | GRM6    | glutamate receptor, metabotropic 6                            | CCDS4442.1  | chr5_178413541-178413541_G_A  | 572R>C  | Substitution | Nonsynonymous coding | 34% |
| MM12T | GRM7    | glutamate receptor, metabotropic 7                            | CCDS43042.1 | chr3_6903497-6903497_C_T      | 141P>L  | Substitution | Nonsynonymous coding | 32% |
| MM12T | GRPEL2  | GrpE-like 2, mitochondrial (E. coli)                          | CCDS4295.1  | chr5_148725107-148725107_C_T  | 2A>V    | Substitution | Nonsynonymous coding | 29% |
| MM12T | GRTF1   | growth hormone regulated TBC protein 1                        | CCDS9534.2  | chr13_113980035-113980035_C_T | 288D>N  | Substitution | Nonsynonymous coding | 15% |
| MM12T | GSC2    | goosecoid homeobox 2                                          | CCDS13757.1 | chr22_19136536-19136536_C_T   | 196G>S  | Substitution | Nonsynonymous coding | 38% |
| MM12T | GSPT2   | G1 to S phase transition 2                                    | CCDS14336.1 | chrX_51486942-51486942_C_T    | 74R>W   | Substitution | Nonsynonymous coding | 11% |
| MM12T | GSPT2   | G1 to S phase transition 2                                    | CCDS14336.1 | chrX_51488476-51488476_G_A    | 585R>H  | Substitution | Nonsynonymous coding | 30% |
| MM12T | GSR     | glutathione reductase                                         | CCDS34877.1 | chr8_30538444-30538444_C_T    | 466V>I  | Substitution | Nonsynonymous coding | 23% |
| MM12T | GSR     | glutathione reductase                                         | CCDS34877.1 | chr8_30538502-30538502_G_T    | 446S>R  | Substitution | Nonsynonymous coding | 17% |
| MM12T | GSTP1   | glutathione S-transferase pi 1                                | CCDS41679.1 | chr11_67352222-67352222_C_T   | 71R>C   | Substitution | Nonsynonymous coding | 12% |
| MM12T | GTDC2   | glycosyltransferase-like domain containing 2                  | CCDS2709.1  | chr3_43121788-43121788_G_A    | 379T>M  | Substitution | Nonsynonymous coding | 34% |
| MM12T | GTF2B   | general transcription factor IIB                              | CCDS715.1   | chr1_89325627-89325627_G_A    | 158A>V  | Substitution | Nonsynonymous coding | 37% |
| MM12T | GTF3C2  | general transcription factor IIIC, polypeptide 2, beta 110kDa | CCDS1749.1  | chr2_27549573-27549573_G_A    | 902P>L  | Substitution | Nonsynonymous coding | 27% |
| MM12T | GTF3C4  | general transcription factor IIIC, polypeptide 4, 90kDa       | CCDS6953.1  | chr9_135554285-135554285_G_A  | 427V>I  | Substitution | Nonsynonymous coding | 29% |

|       |         |                                                                              |                 |                               |        |              |                      |     |
|-------|---------|------------------------------------------------------------------------------|-----------------|-------------------------------|--------|--------------|----------------------|-----|
| MM12T | GTF3C5  | general transcription factor IIIC, polypeptide 5, 63kDa                      | ENST00000372089 | chr9_135930426-135930426_G_T  | 255R>M | Substitution | Nonsynonymous coding | 29% |
| MM12T | GTPBP1  | GTP binding protein 1                                                        | CCDS13977.2     | chr22_39104964-39104964_G_A   | ISV+3> | Substitution | Splice site donor    | 23% |
| MM12T | GTPBP3  | GTP binding protein 3 (mitochondrial)                                        | CCDS32950.1     | chr19_17452467-17452467_G_T   | 510E>D | Substitution | Nonsynonymous coding | 34% |
| MM12T | GTPBP5  | GTP binding protein 5 (putative)                                             | CCDS13492.1     | chr20_60773864-60773864_C_T   | 215R>X | Substitution | Nonsense             | 13% |
| MM12T | GTPBP8  | GTP-binding protein 8 (putative)                                             | CCDS33820.1     | chr3_112709920-112709920_G_A  | 25R>H  | Substitution | Nonsynonymous coding | 11% |
| MM12T | GUCY1B2 | guanylate cyclase 1, soluble, beta 2 (pseudogene)                            | ENST00000378172 | chr13_51598407-51598407_C_A   | 221G>X | Substitution | Nonsense             | 14% |
| MM12T | GUCY1B3 | guanylate cyclase 1, soluble, beta 3                                         | CCDS47154.1     | chr4_156710956-156710956_G_T  | 130G>X | Substitution | Nonsense             | 14% |
| MM12T | GUCY2F  | guanylate cyclase 2F, retinal                                                | CCDS14545.1     | chrX_108636233-108636233_G_A  | 826R>W | Substitution | Nonsynonymous coding | 13% |
| MM12T | GUF1    | GUF1 GTPase homolog (S. cerevisiae)                                          | CCDS3468.1      | chr4_44682800-44682800_G_T    | 123A>S | Substitution | Nonsynonymous coding | 25% |
| MM12T | GZMB    | granzyme B (granzyme 2, cytotoxic T-lymphocyte-associated serine esterase 1) | CCDS9633.1      | chr14_25101100-25101100_G_T   | 188C>X | Substitution | Nonsense             | 35% |
| MM12T | H1FOO   | H1 histone family, member O, oocyte-specific                                 | CCDS3064.1      | chr3_129266513-129266513_G_A  | 123G>D | Substitution | Nonsynonymous coding | 40% |
| MM12T | H1FOO   | H1 histone family, member O, oocyte-specific                                 | CCDS3064.1      | chr3_129268039-129268039_G_A  | 192A>T | Substitution | Nonsynonymous coding | 28% |
| MM12T | H2AFY   | H2A histone family, member Y                                                 | CCDS4185.1      | chr5_134724734-134724734_G_A  | 17A>V  | Substitution | Nonsynonymous coding | 12% |
| MM12T | H6PD    | hexose-6-phosphate dehydrogenase (glucose 1-dehydrogenase)                   | CCDS101.1       | chr1_9323930-9323930_G_A      | 460V>I | Substitution | Nonsynonymous coding | 35% |
| MM12T | HACL1   | 2-hydroxyacyl-CoA lyase 1                                                    | CCDS2627.1      | chr3_15613280-15613280_A_     | NA     | Deletion     | Splice site acceptor | 18% |
| MM12T | HAL     | histidine ammonia-lyase                                                      | CCDS9058.1      | chr12_96387702-96387702_A_G   | ISV+2> | Substitution | Splice site donor    | 13% |
| MM12T | HAPLN1  | hyaluronan and proteoglycan link protein 1                                   | CCDS4061.1      | chr5_82969333-82969333_G_T    | 4L>I   | Substitution | Nonsynonymous coding | 34% |
| MM12T | HAPLN2  | hyaluronan and proteoglycan link protein 2                                   | CCDS1148.1      | chr1_156593317-156593317_G_A  | 12R>H  | Substitution | Nonsynonymous coding | 31% |
| MM12T | HARBI1  | harbinger transposase derived 1                                              | CCDS7920.1      | chr11_46637429-46637429_C_T   | 120R>H | Substitution | Nonsynonymous coding | 12% |
| MM12T | HAS1    | hyaluronan synthase 1                                                        | ENST00000376738 | chr19_52217367-52217367_C_T   | 180A>T | Substitution | Nonsynonymous coding | 13% |
| MM12T | HAUS5   | HAUS augmin-like complex, subunit 5                                          | CCDS42550.1     | chr19_36109051-36109051_C_T   | 259R>W | Substitution | Nonsynonymous coding | 31% |
| MM12T | HBA2    | hemoglobin, alpha 2                                                          | CCDS10398.1     | chr16_223565-223565_C_T       | 132S>F | Substitution | Nonsynonymous coding | 10% |
| MM12T | HBE1    | hemoglobin, epsilon 1                                                        | CCDS7756.1      | chr11_5290794-5290794_G_T     | 69L>M  | Substitution | Nonsynonymous coding | 31% |
| MM12T | HBS1L   | HBS1-like (S. cerevisiae)                                                    | CCDS5173.1      | chr6_135307949-135307949_C_A  | ISV-1> | Substitution | Splice site acceptor | 23% |
| MM12T | HCFC2   | host cell factor C2                                                          | CCDS9097.1      | chr12_104496990-104496990_A_G | 773Y>C | Substitution | Nonsynonymous coding | 37% |
| MM12T | HCRT    | hypocretin (orexin) neuropeptide precursor                                   | CCDS11421.1     | chr17_40337373-40337373_G_A   | 4P>L   | Substitution | Nonsynonymous coding | 21% |
| MM12T | HDAC10  | histone deacetylase 10                                                       | CCDS14088.1     | chr22_50686323-50686323_C_A   | 445A>S | Substitution | Nonsynonymous coding | 12% |
| MM12T | HDAC6   | histone deacetylase 6                                                        | CCDS14306.1     | chrX_48674580-48674580_G_A    | 509R>Q | Substitution | Nonsynonymous coding | 22% |
| MM12T | HDAC6   | histone deacetylase 6                                                        | CCDS14306.1     | chrX_48676758-48676758_G_A    | 709R>H | Substitution | Nonsynonymous coding | 16% |
| MM12T | HDAC7   | histone deacetylase 7                                                        | CCDS8756.2      | chr12_48177971-48177971_C_T   | 941A>T | Substitution | Nonsynonymous coding | 31% |
| MM12T | HDAC7   | histone deacetylase 7                                                        | CCDS8756.2      | chr12_48189390-48189390_G_A   | 356S>F | Substitution | Nonsynonymous coding | 12% |
| MM12T | HDAC7   | histone deacetylase 7                                                        | CCDS8756.2      | chr12_48187203-48187203_G_A   | 543R>X | Substitution | Nonsense             | 38% |

|       |         |                                                                            |              |                               |         |              |                      |     |
|-------|---------|----------------------------------------------------------------------------|--------------|-------------------------------|---------|--------------|----------------------|-----|
| MM12T | HDAC9   | histone deacetylase 9                                                      | CCDS47553.1  | chr7_18767227-18767227_C_T    | 586R>C  | Substitution | Nonsynonymous coding | 25% |
| MM12T | HDAC9   | histone deacetylase 9                                                      | CCDS47553.1  | chr7_18833029-18833029_G_A    | 759G>D  | Substitution | Nonsynonymous coding | 30% |
| MM12T | HDFGRP2 | Hepatoma-derived growth factor-related protein 2 [Source:UniProtKB/Swiss-  | NM_001001520 | chr19_4488764-4488764_C_T     | 127A>V  | Substitution | Nonsynonymous coding | 14% |
| MM12T | HDLBP   | high density lipoprotein binding protein                                   | CCDS2547.1   | chr2_242170301-242170301_G_A  | 1116A>V | Substitution | Nonsynonymous coding | 18% |
| MM12T | HDLBP   | high density lipoprotein binding protein                                   | CCDS2547.1   | chr2_242179456-242179456_G_A  | 751R>C  | Substitution | Nonsynonymous coding | 11% |
| MM12T | HDLBP   | high density lipoprotein binding protein                                   | CCDS2547.1   | chr2_242195708-242195708_C_T  | 255R>H  | Substitution | Nonsynonymous coding | 22% |
| MM12T | HEATR1  | HEAT repeat containing 1                                                   | CCDS31066.1  | chr1_236766620-236766620_C_T  | 67A>T   | Substitution | Nonsynonymous coding | 25% |
| MM12T | HEATR4  | HEAT repeat containing 4                                                   | CCDS9815.1   | chr14_73962003-73962003_C_T   | 858R>H  | Substitution | Nonsynonymous coding | 30% |
| MM12T | HEATR5B | HEAT repeat containing 5B                                                  | CCDS33181.1  | chr2_37292000-37292000_T_G    | 489E>D  | Substitution | Nonsynonymous coding | 37% |
| MM12T | HEATR6  | HEAT repeat containing 6                                                   | CCDS11623.1  | chr17_58147094-58147094_G_T   | 306S>Y  | Substitution | Nonsynonymous coding | 24% |
| MM12T | HECTD1  | HECT domain containing E3 ubiquitin protein ligase 1                       | CCDS41939.1  | chr14_31583160-31583160_G_A   | 1927R>C | Substitution | Nonsynonymous coding | 11% |
| MM12T | HECTD1  | HECT domain containing E3 ubiquitin protein ligase 1                       | CCDS41939.1  | chr14_31598492-31598492_C_A   | 1362S>I | Substitution | Nonsynonymous coding | 31% |
| MM12T | HECW1   | HECT, C2 and WW domain containing E3 ubiquitin protein ligase 1            | CCDS5469.2   | chr7_43546759-43546759_G_A    | 1219A>T | Substitution | Nonsynonymous coding | 11% |
| MM12T | HECW1   | HECT, C2 and WW domain containing E3 ubiquitin protein ligase 1            | CCDS5469.2   | chr7_43546790-43546790_C_T    | 1229A>V | Substitution | Nonsynonymous coding | 23% |
| MM12T | HELZ2   | helicase with zinc finger 2, transcriptional coactivator                   | CCDS13527.1  | chr20_62198989-62198989_G_    | NA      | Deletion     | Frameshift           | 13% |
| MM12T | HELZ2   | helicase with zinc finger 2, transcriptional coactivator                   | CCDS33508.1  | chr20_62194855-62194855_C_T   | 1774G>S | Substitution | Nonsynonymous coding | 15% |
| MM12T | HEPACAM | hepatic and glial cell adhesion molecule                                   | CCDS8456.1   | chr11_124793754-124793754_G_A | 194L>F  | Substitution | Nonsynonymous coding | 16% |
| MM12T | HEPHL1  | hephaestin-like 1                                                          | CCDS44710.1  | chr11_93800872-93800872_C_A   | 340P>H  | Substitution | Nonsynonymous coding | 18% |
| MM12T | HERC1   | HECT and RLD domain containing E3 ubiquitin protein ligase family member 1 | CCDS45277.1  | chr15_63915053-63915053_G_A   | 4550S>F | Substitution | Nonsynonymous coding | 33% |
| MM12T | HERC1   | HECT and RLD domain containing E3 ubiquitin protein ligase family member 1 | CCDS45277.1  | chr15_64015450-64015450_C_T   | 1225A>T | Substitution | Nonsynonymous coding | 32% |
| MM12T | HERC2   | HECT and RLD domain containing E3 ubiquitin protein ligase 2               | CCDS10021.1  | chr15_28420699-28420699_C_T   | 3264V>I | Substitution | Nonsynonymous coding | 14% |
| MM12T | HERC2   | HECT and RLD domain containing E3 ubiquitin protein ligase 2               | CCDS10021.1  | chr15_28427555-28427555_C_A   | 2977G>C | Substitution | Nonsynonymous coding | 13% |
| MM12T | HERC2   | HECT and RLD domain containing E3 ubiquitin protein ligase 2               | CCDS10021.1  | chr15_28514428-28514428_C_T   | 471R>H  | Substitution | Nonsynonymous coding | 12% |
| MM12T | HERC2   | HECT and RLD domain containing E3 ubiquitin protein ligase 2               | CCDS10021.1  | chr15_28519467-28519467_G_A   | 257A>V  | Substitution | Nonsynonymous coding | 33% |
| MM12T | HERC4   | HECT and RLD domain containing E3 ubiquitin protein ligase 4               | CCDS41533.1  | chr10_69832837-69832837_C_T   | 10G>E   | Substitution | Nonsynonymous coding | 20% |
| MM12T | HERC5   | HECT and RLD domain containing E3 ubiquitin protein ligase 5               | CCDS3630.1   | chr4_89381266-89381266_A_     | NA      | Deletion     | Frameshift           | 44% |
| MM12T | HERC5   | HECT and RLD domain containing E3 ubiquitin protein ligase 5               | CCDS3630.1   | chr4_89426859-89426859_G_A    | 969D>N  | Substitution | Nonsynonymous coding | 39% |
| MM12T | HESX1   | HESX homeobox 1                                                            | CCDS2881.1   | chr3_57232894-57232894_C_A    | 82E>X   | Substitution | Nonsense             | 30% |
| MM12T | HGFAC   | HGF activator                                                              | CCDS3369.1   | chr4_3447850-3447850_G_A      | 395G>D  | Substitution | Nonsynonymous coding | 35% |
| MM12T | HGFAC   | HGF activator                                                              | CCDS3369.1   | chr4_3449275-3449275_C_T      | 471T>M  | Substitution | Nonsynonymous coding | 10% |
| MM12T | HGS     | hepatocyte growth factor-regulated tyrosine kinase substrate               | CCDS11784.1  | chr17_79658518-79658518_T_G   | 193C>W  | Substitution | Nonsynonymous coding | 33% |
| MM12T | HGS     | hepatocyte growth factor-regulated tyrosine kinase substrate               | CCDS11784.1  | chr17_79660781-79660781_T_C   | 280L>P  | Substitution | Nonsynonymous coding | 38% |

|       |           |                                                                |                 |                               |         |              |                      |     |
|-------|-----------|----------------------------------------------------------------|-----------------|-------------------------------|---------|--------------|----------------------|-----|
| MM12T | HGS       | hepatocyte growth factor-regulated tyrosine kinase substrate   | CCDS11784.1     | chr17_79663417-79663417_C_T   | 475A>V  | Substitution | Nonsynonymous coding | 32% |
| MM12T | HGS       | hepatocyte growth factor-regulated tyrosine kinase substrate   | CCDS11784.1     | chr17_79663743-79663743_C_T   | 558A>V  | Substitution | Nonsynonymous coding | 40% |
| MM12T | HHIPL1    | HHIP-like 1                                                    | CCDS45162.1     | chr14_100125791-100125791_G_A | 358R>H  | Substitution | Nonsynonymous coding | 14% |
| MM12T | HHIPL2    | HHIP-like 2                                                    | CCDS1530.2      | chr1_222696957-222696957_C_T  | 629A>T  | Substitution | Nonsynonymous coding | 33% |
| MM12T | HID1      | HID1 domain containing                                         | CCDS32726.1     | chr17_72958080-72958080_C_T   | 206E>K  | Substitution | Nonsynonymous coding | 12% |
| MM12T | HIF3A     | hypoxia inducible factor 3, alpha subunit                      | CCDS12681.2     | chr19_46834528-46834528_C_A   | 610L>M  | Substitution | Nonsynonymous coding | 26% |
| MM12T | HINFP     | histone H4 transcription factor                                | CCDS8414.1      | chr11_118997775-118997775_C_T | 41Q>X   | Substitution | Nonsense             | 37% |
| MM12T | HIP1R     | huntingtin interacting protein 1 related                       | CCDS31922.1     | chr12_123345246-123345246_T_C | 894V>A  | Substitution | Nonsynonymous coding | 10% |
| MM12T | HIPK1     | homeodomain interacting protein kinase 1                       | CCDS867.1       | chr1_114514469-114514469_C_T  | 1013P>S | Substitution | Nonsynonymous coding | 12% |
| MM12T | HIPK1     | homeodomain interacting protein kinase 1                       | CCDS867.1       | chr1_114515739-114515739_G_A  | 1080A>T | Substitution | Nonsynonymous coding | 33% |
| MM12T | HIPK2     | homeodomain interacting protein kinase 2                       | NM_022740       | chr7_139258092-139258092_C_T  | 1060A>T | Substitution | Nonsynonymous coding | 31% |
| MM12T | HIST1H2AH | histone cluster 1, H2ah                                        | CCDS4622.1      | chr6_27114908-27114908_A_T    | 1M>L    | Substitution | Nonsynonymous coding | 10% |
| MM12T | HIVEP2    | human immunodeficiency virus type I enhancer binding protein 2 | CCDS43510.1     | chr6_143092148-143092148_C_T  | 1243G>D | Substitution | Nonsynonymous coding | 11% |
| MM12T | HIVEP3    | human immunodeficiency virus type I enhancer binding protein 3 | CCDS463.1       | chr1_42049427-42049427_G_C    | 348H>D  | Substitution | Nonsynonymous coding | 38% |
| MM12T | HJURP     | Holliday junction recognition protein                          | CCDS33406.1     | chr2_234750809-234750809_G_A  | 206A>V  | Substitution | Nonsynonymous coding | 26% |
| MM12T | HK1       | hexokinase 1                                                   | CCDS7289.1      | chr10_71158430-71158430_G_A   | 823V>I  | Substitution | Nonsynonymous coding | 30% |
| MM12T | HK2       | hexokinase 2                                                   | CCDS1956.1      | chr2_75105930-75105930_G_A    | 383A>T  | Substitution | Nonsynonymous coding | 34% |
| MM12T | HK3       | hexokinase 3 (white cell)                                      | CCDS4407.1      | chr5_176314532-176314532_G_A  | 507A>V  | Substitution | Nonsynonymous coding | 37% |
| MM12T | HK3       | hexokinase 3 (white cell)                                      | CCDS4407.1      | chr5_176318154-176318154_C_A  | 100G>W  | Substitution | Nonsynonymous coding | 35% |
| MM12T | HKDC1     | hexokinase domain containing 1                                 | CCDS7288.1      | chr10_71025345-71025345_C_T   | 793R>W  | Substitution | Nonsynonymous coding | 31% |
| MM12T | HKR1      | HKR1, GLI-Kruppel zinc finger family member                    | CCDS12502.1     | chr19_37854163-37854163_G_T   | 489R>M  | Substitution | Nonsynonymous coding | 32% |
| MM12T | HLA-DOB   | major histocompatibility complex, class II, DO beta            | CCDS4754.1      | chr6_32782988-32782988_C_T    | 65R>H   | Substitution | Nonsynonymous coding | 11% |
| MM12T | HLA-E     | major histocompatibility complex, class I, E                   | CCDS34379.1     | chr6_30458013-30458013_C_A    | ISV-4>  | Substitution | Splice site acceptor | 25% |
| MM12T | HLX       | H2.0-like homeobox                                             | CCDS1527.1      | chr1_221053738-221053738_G_A  | 180R>H  | Substitution | Nonsynonymous coding | 31% |
| MM12T | HLX       | H2.0-like homeobox                                             | CCDS1527.1      | chr1_221055560-221055560_G_A  | 276R>H  | Substitution | Nonsynonymous coding | 12% |
| MM12T | HM13      | histocompatibility (minor) 13                                  | CCDS42861.1     | chr20_30137888-30137888_G_A   | 230V>M  | Substitution | Nonsynonymous coding | 13% |
| MM12T | HMCN1     | hemicentin 1                                                   | CCDS30956.1     | chr1_186113368-186113368_C_T  | 4663T>I | Substitution | Nonsynonymous coding | 17% |
| MM12T | HMCN2     | hemicentin 2                                                   | ENST00000420499 | chr9_133231606-133231606_C_T  | 455R>W  | Substitution | Nonsynonymous coding | 12% |
| MM12T | HMCN2     | hemicentin 2                                                   | ENST00000428715 | chr9_133298093-133298093_G_A  | 164R>H  | Substitution | Nonsynonymous coding | 32% |
| MM12T | HMGB4     | high mobility group box 4                                      | NM_145205       | chr1_34329968-34329968_A_G    | 59K>R   | Substitution | Nonsynonymous coding | 32% |
| MM12T | HMG5      | high mobility group nucleosome binding domain 5                | CCDS14448.1     | chrX_80371786-80371786_C_A    | 62A>S   | Substitution | Nonsynonymous coding | 33% |
| MM12T | HMGXB3    | HMG box domain containing 3                                    | ENST00000421549 | chr5_149380596-149380596_G_A  | 197R>H  | Substitution | Nonsynonymous coding | 12% |

|       |          |                                                              |             |                               |         |              |                      |     |
|-------|----------|--------------------------------------------------------------|-------------|-------------------------------|---------|--------------|----------------------|-----|
| MM12T | HNF1A    | HNF1 homeobox A                                              | CCDS9209.1  | chr12_121431482-121431482_G_A | 229R>Q  | Substitution | Nonsynonymous coding | 29% |
| MM12T | HNRNP1   | heterogeneous nuclear ribonucleoprotein H1 (H)               | CCDS4446.1  | chr5_179044837-179044837_C_T  | 295G>E  | Substitution | Nonsynonymous coding | 55% |
| MM12T | HNRNP2   | heterogeneous nuclear ribonucleoprotein H2 (H')              | CCDS14485.1 | chrX_100667701-100667701_G_A  | 242G>D  | Substitution | Nonsynonymous coding | 12% |
| MM12T | HOMER1   | homer homolog 1 (Drosophila)                                 | CCDS43335.1 | chr5_78693456-78693456_G_T    | 230T>N  | Substitution | Nonsynonymous coding | 33% |
| MM12T | HOMER2   | homer homolog 2 (Drosophila)                                 | CCDS45334.1 | chr15_83523542-83523542_C_T   | 180V>M  | Substitution | Nonsynonymous coding | 31% |
| MM12T | HOXA11   | homeobox A11                                                 | CCDS5411.1  | chr7_27224102-27224102_C_T    | 221S>N  | Substitution | Nonsynonymous coding | 15% |
| MM12T | HOXA13   | homeobox A13                                                 | CCDS5412.1  | chr7_27238934-27238934_C_T    | 255V>M  | Substitution | Nonsynonymous coding | 32% |
| MM12T | HOXA3    | homeobox A3                                                  | CCDS5404.1  | chr7_27148105-27148105_C_T    | 254G>D  | Substitution | Nonsynonymous coding | 31% |
| MM12T | HOXA4    | homeobox A4                                                  | CCDS5405.1  | chr7_27169073-27169073_C_T    | 245R>H  | Substitution | Nonsynonymous coding | 34% |
| MM12T | HOXA5    | homeobox A5                                                  | CCDS5406.1  | chr7_27183222-27183222_C_T    | 2S>N    | Substitution | Nonsynonymous coding | 27% |
| MM12T | HOXC6    | homeobox C6                                                  | CCDS8871.1  | chr12_54422550-54422550_A_G   | 82D>G   | Substitution | Nonsynonymous coding | 13% |
| MM12T | HPCAL1   | hippocalcin-like 1                                           | CCDS1671.1  | chr2_10559933-10559933_G_A    | 17R>Q   | Substitution | Nonsynonymous coding | 18% |
| MM12T | HPN      | hepsin                                                       | CCDS32993.1 | chr19_35551281-35551281_G_A   | 162R>H  | Substitution | Nonsynonymous coding | 30% |
| MM12T | HPRT1    | hypoxanthine phosphoribosyltransferase 1                     | CCDS14641.1 | chrX_133609314-133609314_G_T  | 80D>Y   | Substitution | Nonsynonymous coding | 39% |
| MM12T | HPS4     | Hermansky-Pudlak syndrome 4                                  | CCDS13835.1 | chr22_26861492-26861492_C_A   | 244Q>H  | Substitution | Nonsynonymous coding | 28% |
| MM12T | HPS5     | Hermansky-Pudlak syndrome 5                                  | CCDS7836.1  | chr11_18313554-18313554_C_A   | 625Q>H  | Substitution | Nonsynonymous coding | 30% |
| MM12T | HPS6     | Hermansky-Pudlak syndrome 6                                  | CCDS7527.1  | chr10_103826900-103826900_C_  | NA      | Deletion     | Frameshift           | 28% |
| MM12T | HPSE     | heparanase                                                   | CCDS3602.1  | chr4_84231985-84231985_T_G    | 244E>D  | Substitution | Nonsynonymous coding | 48% |
| MM12T | HPX      | hemopexin                                                    | CCDS7763.1  | chr11_6452970-6452970_G_A     | 344R>W  | Substitution | Nonsynonymous coding | 26% |
| MM12T | HR       | hair growth associated                                       | CCDS6022.1  | chr8_21974470-21974470_C_T    | 1099R>Q | Substitution | Nonsynonymous coding | 41% |
| MM12T | HR       | hair growth associated                                       | CCDS6022.1  | chr8_21984685-21984685_C_T    | 424G>S  | Substitution | Nonsynonymous coding | 30% |
| MM12T | HRASL5   | HRAS-like suppressor family, member 5                        | CCDS8044.1  | chr11_63233649-63233649_C_T   | 227S>N  | Substitution | Nonsynonymous coding | 20% |
| MM12T | HRCT1    | histidine rich carboxyl terminus 1                           | CCDS35012.1 | chr9_35906330-35906330_G_T    | 16G>C   | Substitution | Nonsynonymous coding | 32% |
| MM12T | HRG      | histidine-rich glycoprotein                                  | CCDS3280.1  | chr3_186386754-186386754_G_A  | 72D>N   | Substitution | Nonsynonymous coding | 25% |
| MM12T | HS3ST4   | heparan sulfate (glucosamine) 3-O-sulfotransferase 4         | NM_006040   | chr16_26147228-26147228_C_A   | 344L>I  | Substitution | Nonsynonymous coding | 37% |
| MM12T | HS6ST3   | heparan sulfate 6-O-sulfotransferase 3                       | CCDS9481.1  | chr13_96743184-96743184_A_G   | 23Y>C   | Substitution | Nonsynonymous coding | 25% |
| MM12T | HSD11B2  | hydroxysteroid (11-beta) dehydrogenase 2                     | CCDS10837.1 | chr16_67470575-67470575_G_A   | 296G>D  | Substitution | Nonsynonymous coding | 28% |
| MM12T | HSD17B3  | hydroxysteroid (17-beta) dehydrogenase 3                     | CCDS6716.1  | chr9_99007671-99007671_C_T    | 188A>T  | Substitution | Nonsynonymous coding | 32% |
| MM12T | HSF2BP   | heat shock transcription factor 2 binding protein            | CCDS13697.1 | chr21_45053168-45053168_C_A   | 142K>N  | Substitution | Nonsynonymous coding | 37% |
| MM12T | HSF2BP   | heat shock transcription factor 2 binding protein            | CCDS13697.1 | chr21_45077962-45077962_C_T   | 6A>T    | Substitution | Nonsynonymous coding | 13% |
| MM12T | HSF5     | heat shock transcription factor family member 5              | CCDS32690.1 | chr17_56565518-56565518_G_A   | 40L>F   | Substitution | Nonsynonymous coding | 26% |
| MM12T | HSP90AA1 | heat shock protein 90kDa alpha (cytosolic), class A member 1 | CCDS32160.1 | chr14_102549996-102549996_T_G | 580K>T  | Substitution | Nonsynonymous coding | 35% |

|       |         |                                                                    |             |                               |         |              |                      |     |
|-------|---------|--------------------------------------------------------------------|-------------|-------------------------------|---------|--------------|----------------------|-----|
| MM12T | HSPA13  | heat shock protein 70kDa family, member 13                         | CCDS13567.1 | chr21_15747984-15747984_C_A   | 246R>L  | Substitution | Nonsynonymous coding | 12% |
| MM12T | HSPA1A  | heat shock 70kDa protein 1A                                        | CCDS34414.1 | chr6_31785269-31785269_C_T    | 579S>L  | Substitution | Nonsynonymous coding | 41% |
| MM12T | HSPA1L  | heat shock 70kDa protein 1-like                                    | CCDS34413.1 | chr6_31778061-31778061_C_A    | 563K>N  | Substitution | Nonsynonymous coding | 20% |
| MM12T | HSPG2   | heparan sulfate proteoglycan 2                                     | NM_005529   | chr1_22158266-22158266_G_A    | 3744A>V | Substitution | Nonsynonymous coding | 15% |
| MM12T | HSPG2   | heparan sulfate proteoglycan 2                                     | NM_005529   | chr1_22160386-22160386_G_A    | 3585R>C | Substitution | Nonsynonymous coding | 29% |
| MM12T | HSPG2   | heparan sulfate proteoglycan 2                                     | NM_005529   | chr1_22161303-22161303_C_T    | 3530R>Q | Substitution | Nonsynonymous coding | 17% |
| MM12T | HSPG2   | heparan sulfate proteoglycan 2                                     | NM_005529   | chr1_22174529-22174529_C_T    | 2599V>M | Substitution | Nonsynonymous coding | 15% |
| MM12T | HSPG2   | heparan sulfate proteoglycan 2                                     | NM_005529   | chr1_22179286-22179286_C_T    | 2211A>T | Substitution | Nonsynonymous coding | 36% |
| MM12T | HSPH1   | heat shock 105kDa/110kDa protein 1                                 | CCDS9340.1  | chr13_31722621-31722623_AAA_  | NA      | Deletion     | Splice site acceptor | 17% |
| MM12T | HSPH1   | heat shock 105kDa/110kDa protein 1                                 | CCDS9340.1  | chr13_31725211-31725211_G_A   | 261R>X  | Substitution | Nonsense             | 28% |
| MM12T | HTATSF1 | HIV-1 Tat specific factor 1                                        | CCDS14657.1 | chrX_135593813-135593813_G_A  | 637V>I  | Substitution | Nonsynonymous coding | 12% |
| MM12T | HTR1A   | 5-hydroxytryptamine (serotonin) receptor 1A, G protein-coupled     | CCDS34168.1 | chr5_63256682-63256682_C_T    | 289A>T  | Substitution | Nonsynonymous coding | 30% |
| MM12T | HTR1B   | 5-hydroxytryptamine (serotonin) receptor 1B, G protein-coupled     | CCDS4986.1  | chr6_78172993-78172993_G_A    | 43S>F   | Substitution | Nonsynonymous coding | 24% |
| MM12T | HTR2B   | 5-hydroxytryptamine (serotonin) receptor 2B, G protein-coupled     | CCDS2483.1  | chr2_231974040-231974040_G_A  | 213R>C  | Substitution | Nonsynonymous coding | 44% |
| MM12T | HTR2B   | 5-hydroxytryptamine (serotonin) receptor 2B, G protein-coupled     | CCDS2483.1  | chr2_231978575-231978575_C_T  | 141A>T  | Substitution | Nonsynonymous coding | 18% |
| MM12T | HTR2B   | 5-hydroxytryptamine (serotonin) receptor 2B, G protein-coupled     | CCDS2483.1  | chr2_231988139-231988139_T_C  | 114T>A  | Substitution | Nonsynonymous coding | 11% |
| MM12T | HTR3B   | 5-hydroxytryptamine (serotonin) receptor 3B, ionotropic            | CCDS8364.1  | chr11_113816854-113816854_G_A | 441V>M  | Substitution | Nonsynonymous coding | 33% |
| MM12T | HTR3C   | 5-hydroxytryptamine (serotonin) receptor 3C, ionotropic            | CCDS3250.1  | chr3_183772623-183772623_G_A  | 61S>N   | Substitution | Nonsynonymous coding | 13% |
| MM12T | HTRA3   | HtrA serine peptidase 3                                            | CCDS3400.1  | chr4_8288325-8288325_G_A      | 175G>S  | Substitution | Nonsynonymous coding | 24% |
| MM12T | HTT     | huntingtin                                                         | CCDS43206.1 | chr4_3180065-3180065_G_A      | 1502V>I | Substitution | Nonsynonymous coding | 20% |
| MM12T | HTT     | huntingtin                                                         | CCDS43206.1 | chr4_3235020-3235020_C_T      | 2799A>V | Substitution | Nonsynonymous coding | 12% |
| MM12T | HUS1B   | HUS1 checkpoint homolog b (S. pombe)                               | CCDS4470.1  | chr6_656180-656180_C_T        | 255W>X  | Substitution | Nonsense             | 11% |
| MM12T | HUWE1   | HECT, UBA and WWE domain containing 1, E3 ubiquitin protein ligase | CCDS35301.1 | chrX_53562435-53562435_G_A    | 4187R>C | Substitution | Nonsynonymous coding | 13% |
| MM12T | HYAL2   | hyaluronoglucosaminidase 2                                         | CCDS2818.1  | chr3_50355841-50355841_G_A    | 381P>S  | Substitution | Nonsynonymous coding | 29% |
| MM12T | HYDIN   | HYDIN, axonemal central pair apparatus protein                     | CCDS42189.1 | chr16_70975661-70975661_G_T   | 2243A>D | Substitution | Nonsynonymous coding | 14% |
| MM12T | HYLS1   | hydrolethalus syndrome 1                                           | CCDS8467.1  | chr11_125770101-125770101_C_T | 280R>C  | Substitution | Nonsynonymous coding | 25% |
| MM12T | HYOU1   | hypoxia up-regulated 1                                             | CCDS8408.1  | chr11_118919207-118919207_G_A | 745A>V  | Substitution | Nonsynonymous coding | 11% |
| MM12T | IARS    | isoleucyl-tRNA synthetase                                          | CCDS6694.1  | chr9_94973153-94973153_G_A    | 1242P>L | Substitution | Nonsynonymous coding | 13% |
| MM12T | IARS    | isoleucyl-tRNA synthetase                                          | CCDS6694.1  | chr9_95012539-95012539_G_T    | 821A>E  | Substitution | Nonsynonymous coding | 35% |
| MM12T | ICA1    | islet cell autoantigen 1, 69kDa                                    | CCDS34602.1 | chr7_8257969-8257969_G_T      | 182P>Q  | Substitution | Nonsynonymous coding | 13% |
| MM12T | ICAM3   | intercellular adhesion molecule 3                                  | CCDS12235.1 | chr19_10446011-10446011_G     | NA      | Insertion    | Frameshift           | 23% |
| MM12T | ICAM3   | intercellular adhesion molecule 3                                  | CCDS12235.1 | chr19_10446425-10446425_G_A   | 191R>C  | Substitution | Nonsynonymous coding | 22% |

|       |         |                                                                                          |                 |                               |         |              |                      |     |
|-------|---------|------------------------------------------------------------------------------------------|-----------------|-------------------------------|---------|--------------|----------------------|-----|
| MM12T | ICAM5   | intercellular adhesion molecule 5, telencephalin                                         | CCDS12233.1     | chr19_10402876-10402876_A_G   | 280D>G  | Substitution | Nonsynonymous coding | 33% |
| MM12T | IER3IP1 | immediate early response 3 interacting protein 1                                         | CCDS11933.1     | chr18_44683893-44683893_T_C   | 36D>G   | Substitution | Nonsynonymous coding | 30% |
| MM12T | IER5    | immediate early response 5                                                               | CCDS1343.1      | chr1_181058316-181058316_C_T  | 93A>V   | Substitution | Nonsynonymous coding | 28% |
| MM12T | IFFO1   | intermediate filament family orphan 1                                                    | CCDS41741.1     | chr12_6664930-6664930_G_A     | 89A>V   | Substitution | Nonsynonymous coding | 33% |
| MM12T | IFI35   | interferon-induced protein 35                                                            | CCDS11450.1     | chr17_41164289-41164289_G_T   | 39D>Y   | Substitution | Nonsynonymous coding | 12% |
| MM12T | IFIT1B  | interferon-induced protein with tetratricopeptide repeats 1B                             | CCDS31242.1     | chr10_91143630-91143630_G_A   | 187R>H  | Substitution | Nonsynonymous coding | 32% |
| MM12T | IFNGR2  | interferon gamma receptor 2 (interferon gamma transducer 1)                              | CCDS33544.1     | chr21_34793851-34793851_G_T   | 91A>S   | Substitution | Nonsynonymous coding | 29% |
| MM12T | IFRD2   | interferon-related developmental regulator 2                                             | CCDS46831.1     | chr3_50328051-50328051_C_A    | 104A>S  | Substitution | Nonsynonymous coding | 28% |
| MM12T | IFT140  | intraflagellar transport 140 homolog (Chlamydomonas)                                     | CCDS10439.1     | chr16_1570334-1570334_G_A     | 1224A>V | Substitution | Nonsynonymous coding | 24% |
| MM12T | IFT172  | intraflagellar transport 172 homolog (Chlamydomonas)                                     | CCDS1755.1      | chr2_27681692-27681692_G_A    | 944A>V  | Substitution | Nonsynonymous coding | 23% |
| MM12T | IFT172  | intraflagellar transport 172 homolog (Chlamydomonas)                                     | CCDS1755.1      | chr2_27693827-27693827_C_A    | 554A>S  | Substitution | Nonsynonymous coding | 29% |
| MM12T | IFT80   | intraflagellar transport 80 homolog (Chlamydomonas)                                      | CCDS3188.1      | chr3_159998594-159998594_C_T  | 509V>M  | Substitution | Nonsynonymous coding | 32% |
| MM12T | IGDCC3  | immunoglobulin superfamily, DCC subclass, member 3                                       | CCDS10205.1     | chr15_65623825-65623825_G_A   | 441R>C  | Substitution | Nonsynonymous coding | 31% |
| MM12T | IGFALS  | insulin-like growth factor binding protein, acid labile subunit                          | CCDS10446.1     | chr16_1840995-1840995_G_A     | 475A>V  | Substitution | Nonsynonymous coding | 34% |
| MM12T | IGFBP5  | insulin-like growth factor binding protein 5                                             | CCDS2405.1      | chr2_217541593-217541593_G_A  | 234R>C  | Substitution | Nonsynonymous coding | 21% |
| MM12T | IGFBPL1 | insulin-like growth factor binding protein-like 1                                        | CCDS35017.1     | chr9_38424346-38424346_G_T    | 26L>I   | Substitution | Nonsynonymous coding | 39% |
| MM12T | IGHA2   | immunoglobulin heavy constant alpha 2 (A2m marker)                                       | ENST00000390538 | chr14_106054556-106054556_G_T | 59P>H   | Substitution | Nonsynonymous coding | 25% |
| MM12T | IGJ     | immunoglobulin J polypeptide, linker protein for immunoglobulin alpha and mu             | CCDS3545.1      | chr4_71527815-71527815_C_T    | 61R>Q   | Substitution | Nonsynonymous coding | 18% |
| MM12T | IGSF11  | immunoglobulin superfamily, member 11                                                    | CCDS46891.1     | chr3_118624560-118624560_C_T  | 196V>I  | Substitution | Nonsynonymous coding | 37% |
| MM12T | IGSF9   | immunoglobulin superfamily, member 9                                                     | CCDS44254.1     | chr1_159904069-159904069_G_A  | 339P>S  | Substitution | Nonsynonymous coding | 12% |
| MM12T | IHH     | Indian hedgehog                                                                          | CCDS33380.1     | chr2_219925069-219925069_G_A  | 41P>S   | Substitution | Nonsynonymous coding | 17% |
| MM12T | IKBKAP  | inhibitor of kappa light polypeptide gene enhancer in B-cells, kinase complex-associated | CCDS6773.1      | chr9_111640345-111640345_G_A  | 1262T>M | Substitution | Nonsynonymous coding | 29% |
| MM12T | IKBKAP  | inhibitor of kappa light polypeptide gene enhancer in B-cells, kinase complex-associated | CCDS6773.1      | chr9_111679862-111679862_G_A  | 277H>Y  | Substitution | Nonsynonymous coding | 37% |
| MM12T | IKKB    | inhibitor of kappa light polypeptide gene enhancer in B-cells, kinase beta               | ENST00000379708 | chr8_42176969-42176969_G_T    | 467D>Y  | Substitution | Nonsynonymous coding | 19% |
| MM12T | IKZF1   | IKAROS family zinc finger 1 (Ikaros)                                                     | NM_006060       | chr7_50468033-50468033_G_A    | 423R>H  | Substitution | Nonsynonymous coding | 13% |
| MM12T | IKZF2   | IKAROS family zinc finger 2 (Helios)                                                     | CCDS2395.1      | chr2_213921568-213921568_C_A  | 132R>M  | Substitution | Nonsynonymous coding | 27% |
| MM12T | IL10RA  | interleukin 10 receptor, alpha                                                           | CCDS8388.1      | chr11_117864716-117864716_C_A | 180F>L  | Substitution | Nonsynonymous coding | 45% |
| MM12T | IL10RA  | interleukin 10 receptor, alpha                                                           | CCDS8388.1      | chr11_117869595-117869595_C_T | 326P>S  | Substitution | Nonsynonymous coding | 10% |
| MM12T | IL15RA  | interleukin 15 receptor, alpha                                                           | CCDS7074.1      | chr10_6001734-6001734_C_T     | 200G>D  | Substitution | Nonsynonymous coding | 32% |
| MM12T | IL17RD  | interleukin 17 receptor D                                                                | CCDS2880.2      | chr3_57144334-57144334_C_T    | 106E>K  | Substitution | Nonsynonymous coding | 28% |
| MM12T | IL17RE  | interleukin 17 receptor E                                                                | CCDS2589.1      | chr3_9944726-9944726_G_A      | 37R>H   | Substitution | Nonsynonymous coding | 38% |
| MM12T | IL1B    | interleukin 1, beta                                                                      | CCDS2102.1      | chr2_113588108-113588108_G_A  | 214R>X  | Substitution | Nonsense             | 35% |



|       |          |                                                                |                 |                              |         |              |                      |     |
|-------|----------|----------------------------------------------------------------|-----------------|------------------------------|---------|--------------|----------------------|-----|
| MM12T | IL1RAPL1 | interleukin 1 receptor accessory protein-like 1                | CCDS14218.1     | chrX_29973704-29973704_C_T   | 620R>C  | Substitution | Nonsynonymous coding | 10% |
| MM12T | IL1RL1   | interleukin 1 receptor-like 1                                  | CCDS2057.1      | chr2_102955492-102955492_C_T | 86T>I   | Substitution | Nonsynonymous coding | 14% |
| MM12T | IL21R    | interleukin 21 receptor                                        | CCDS10630.1     | chr16_27448930-27448930_G_A  | 92D>N   | Substitution | Nonsynonymous coding | 12% |
| MM12T | IL22RA2  | interleukin 22 receptor, alpha 2                               | CCDS5182.1      | chr6_137466864-137466864_G_T | 230A>D  | Substitution | Nonsynonymous coding | 39% |
| MM12T | IL23R    | interleukin 23 receptor                                        | CCDS637.1       | chr1_67724549-67724549_C_A   | 543T>K  | Substitution | Nonsynonymous coding | 22% |
| MM12T | IL2RA    | interleukin 2 receptor, alpha                                  | CCDS7076.1      | chr10_6067971-6067971_G_A    | 28P>S   | Substitution | Nonsynonymous coding | 13% |
| MM12T | IL33     | interleukin 33                                                 | CCDS6468.1      | chr9_6254556-6254556_A_      | NA      | Deletion     | Splice site donor    | 31% |
| MM12T | IL4R     | interleukin 4 receptor                                         | CCDS10629.1     | chr16_27356257-27356257_G_A  | 93V>M   | Substitution | Nonsynonymous coding | 27% |
| MM12T | ILKAP    | integrin-linked kinase-associated serine/threonine phosphatase | CCDS2526.1      | chr2_239079585-239079585_T_C | 346E>G  | Substitution | Nonsynonymous coding | 30% |
| MM12T | IMP4     | IMP4, U3 small nucleolar ribonucleoprotein, homolog (yeast)    | CCDS2160.1      | chr2_131103657-131103657_G_A | 221A>T  | Substitution | Nonsynonymous coding | 14% |
| MM12T | INADL    | InaD-like (Drosophila)                                         | CCDS617.2       | chr1_62253433-62253433_G_T   | 286R>I  | Substitution | Nonsynonymous coding | 13% |
| MM12T | INADL    | InaD-like (Drosophila)                                         | CCDS617.2       | chr1_62503695-62503695_C_T   | 1336P>S | Substitution | Nonsynonymous coding | 31% |
| MM12T | INCA1    | inhibitor of CDK, cyclin A1 interacting protein 1              | CCDS11064.1     | chr17_4892133-4892133_C_T    | 153E>K  | Substitution | Nonsynonymous coding | 25% |
| MM12T | INCENP   | inner centromere protein antigens 135/155kDa                   | CCDS44624.1     | chr11_61908285-61908285_G_A  | 485A>T  | Substitution | Nonsynonymous coding | 11% |
| MM12T | INCENP   | inner centromere protein antigens 135/155kDa                   | CCDS44624.1     | chr11_61908508-61908508_G_A  | 529D>N  | Substitution | Nonsynonymous coding | 12% |
| MM12T | INO80    | INO80 homolog (S. cerevisiae)                                  | CCDS10071.1     | chr15_41371957-41371957_C_T  | 358R>H  | Substitution | Nonsynonymous coding | 37% |
| MM12T | INO80C   | INO80 complex subunit C                                        | CCDS45853.1     | chr18_33048676-33048676_G_A  | 196R>W  | Substitution | Nonsynonymous coding | 42% |
| MM12T | INO80D   | INO80 complex subunit D                                        | CCDS46500.1     | chr2_206892937-206892937_C_T | 399R>Q  | Substitution | Nonsynonymous coding | 36% |
| MM12T | INPP1    | inositol polyphosphate-1-phosphatase                           | CCDS2305.1      | chr2_191235811-191235811_C_A | 295L>I  | Substitution | Nonsynonymous coding | 39% |
| MM12T | INPP4A   | inositol polyphosphate-4-phosphatase, type I, 107kDa           | CCDS46369.1     | chr2_99170953-99170953_G_A   | ISV+1>  | Substitution | Splice site donor    | 27% |
| MM12T | INPP5D   | inositol polyphosphate-5-phosphatase, 145kDa                   | ENST00000359570 | chr2_234098518-234098518_C_T | 794P>L  | Substitution | Nonsynonymous coding | 22% |
| MM12T | INPP5E   | inositol polyphosphate-5-phosphatase, 72 kDa                   | CCDS7000.1      | chr9_139329190-139329190_A_G | ISV+2>  | Substitution | Splice site donor    | 32% |
| MM12T | INPP5K   | inositol polyphosphate-5-phosphatase K                         | CCDS11004.1     | chr17_1401384-1401384_C_T    | 270R>H  | Substitution | Nonsynonymous coding | 21% |
| MM12T | INPPL1   | inositol polyphosphate phosphatase-like 1                      | CCDS8213.1      | chr11_71941426-71941426_C_A  | 371Q>K  | Substitution | Nonsynonymous coding | 35% |
| MM12T | INSIG2   | insulin induced gene 2                                         | CCDS2122.1      | chr2_118860856-118860856_C_T | 110R>W  | Substitution | Nonsynonymous coding | 36% |
| MM12T | INSR     | insulin receptor                                               | CCDS12176.1     | chr19_7117197-7117197_G_A    | 1340A>V | Substitution | Nonsynonymous coding | 30% |
| MM12T | INSRR    | insulin receptor-related receptor                              | CCDS1160.1      | chr1_156816395-156816395_G_A | 576R>W  | Substitution | Nonsynonymous coding | 31% |
| MM12T | INTS1    | integrator complex subunit 1                                   | CCDS47526.1     | chr7_1512723-1512723_C_T     | 2019D>N | Substitution | Nonsynonymous coding | 13% |
| MM12T | INTS1    | integrator complex subunit 1                                   | CCDS47526.1     | chr7_1535091-1535091_C_T     | 604A>T  | Substitution | Nonsynonymous coding | 36% |
| MM12T | INTS10   | integrator complex subunit 10                                  | CCDS6011.2      | chr8_19709194-19709194_G_A   | 671V>M  | Substitution | Nonsynonymous coding | 23% |
| MM12T | INTS12   | integrator complex subunit 12                                  | CCDS3671.1      | chr4_106604107-106604107_C_A | 391S>I  | Substitution | Nonsynonymous coding | 32% |
| MM12T | INTS12   | integrator complex subunit 12                                  | CCDS3671.1      | chr4_106613258-106613258_C_T | 178E>K  | Substitution | Nonsynonymous coding | 13% |

|       |         |                                                  |                 |                              |         |              |                      |     |
|-------|---------|--------------------------------------------------|-----------------|------------------------------|---------|--------------|----------------------|-----|
| MM12T | INTS2   | integrator complex subunit 2                     | CCDS45750.1     | chr17_59967242-59967242_C_T  | 638R>H  | Substitution | Nonsynonymous coding | 14% |
| MM12T | INTS2   | integrator complex subunit 2                     | CCDS45750.1     | chr17_59989401-59989401_C_T  | 235R>Q  | Substitution | Nonsynonymous coding | 19% |
| MM12T | INTS3   | integrator complex subunit 3                     | CCDS1052.1      | chr1_153701150-153701150_G_A | 14A>T   | Substitution | Nonsynonymous coding | 37% |
| MM12T | INTS4   | integrator complex subunit 4                     | CCDS31644.1     | chr11_77692559-77692559_C_A  | 104G>X  | Substitution | Nonsense             | 19% |
| MM12T | INTS5   | integrator complex subunit 5                     | CCDS8027.1      | chr11_62414641-62414641_G_A  | 971R>W  | Substitution | Nonsynonymous coding | 13% |
| MM12T | INTS5   | integrator complex subunit 5                     | CCDS8027.1      | chr11_62414836-62414836_C_T  | 906A>T  | Substitution | Nonsynonymous coding | 39% |
| MM12T | INTS6   | integrator complex subunit 6                     | CCDS9428.1      | chr13_51948517-51948517_C_T  | 644R>Q  | Substitution | Nonsynonymous coding | 36% |
| MM12T | INVS    | inversin                                         | CCDS6746.1      | chr9_103046819-103046819_G_A | 668G>R  | Substitution | Nonsynonymous coding | 15% |
| MM12T | INVS    | inversin                                         | CCDS6746.1      | chr9_103055001-103055001_C_T | 821A>V  | Substitution | Nonsynonymous coding | 28% |
| MM12T | IP6K2   | inositol hexakisphosphate kinase 2               | ENST00000443964 | chr3_48732762-48732762_C_T   | 47R>H   | Substitution | Nonsynonymous coding | 12% |
| MM12T | IPO4    | importin 4                                       | CCDS9616.1      | chr14_24656904-24656904_C_T  | 126S>N  | Substitution | Nonsynonymous coding | 34% |
| MM12T | IPO5    | importin 5                                       | CCDS31999.1     | chr13_98673302-98673302_T_C  | 1059I>T | Substitution | Nonsynonymous coding | 32% |
| MM12T | IPP     | intracisternal A particle-promoted polypeptide   | CCDS30702.1     | chr1_46182596-46182596_C_T   | 427R>H  | Substitution | Nonsynonymous coding | 16% |
| MM12T | IPPK    | inositol 1,3,4,5,6-pentakisphosphate 2-kinase    | CCDS6699.1      | chr9_95400400-95400400_G_A   | 267R>W  | Substitution | Nonsynonymous coding | 30% |
| MM12T | IQCB1   | IQ motif containing B1                           | CCDS33837.1     | chr3_121544924-121544924_G_C | 123Q>E  | Substitution | Nonsynonymous coding | 13% |
| MM12T | IQCC    | IQ motif containing C                            | CCDS355.1       | chr1_32672702-32672702_C_T   | 180A>V  | Substitution | Nonsynonymous coding | 17% |
| MM12T | IQCE    | IQ motif containing E                            | CCDS43542.1     | chr7_2641075-2641075_A_      | NA      | Deletion     | Frameshift           | 22% |
| MM12T | IQCE    | IQ motif containing E                            | CCDS43542.1     | chr7_2641075-2641075_A_G     | 537K>E  | Substitution | Nonsynonymous coding | 13% |
| MM12T | IQCE    | IQ motif containing E                            | CCDS43542.1     | chr7_2641073-2641073_A_C     | ISV-2>  | Substitution | Splice site acceptor | 11% |
| MM12T | IQCF1   | IQ motif containing F1                           | CCDS2836.1      | chr3_51929096-51929096_C_T   | 143R>H  | Substitution | Nonsynonymous coding | 29% |
| MM12T | IQCF2   | IQ motif containing F2                           | CCDS2835.1      | chr3_51897136-51897136_C_T   | 82S>L   | Substitution | Nonsynonymous coding | 14% |
| MM12T | IQCF3   | IQ motif containing F3                           | CCDS46837.1     | chr3_51864572-51864572_C_T   | 74R>W   | Substitution | Nonsynonymous coding | 33% |
| MM12T | IQCF5   | IQ motif containing F5                           | CCDS46838.1     | chr3_51908023-51908023_C_A   | 58R>M   | Substitution | Nonsynonymous coding | 36% |
| MM12T | IQGAP1  | IQ motif containing GTPase activating protein 1  | CCDS10362.1     | chr15_90984899-90984899_A_G  | 271T>A  | Substitution | Nonsynonymous coding | 13% |
| MM12T | IQGAP3  | IQ motif containing GTPase activating protein 3  | CCDS1144.1      | chr1_156498397-156498397_G_A | 1526S>F | Substitution | Nonsynonymous coding | 26% |
| MM12T | IQGAP3  | IQ motif containing GTPase activating protein 3  | CCDS1144.1      | chr1_156499985-156499985_C_T | 1439R>H | Substitution | Nonsynonymous coding | 16% |
| MM12T | IQSEC1  | IQ motif and Sec7 domain 1                       | CCDS33703.1     | chr3_12978121-12978121_C_T   | 146R>H  | Substitution | Nonsynonymous coding | 10% |
| MM12T | IRAK2   | interleukin-1 receptor-associated kinase 2       | CCDS33697.1     | chr3_10276183-10276183_C_T   | 438S>L  | Substitution | Nonsynonymous coding | 31% |
| MM12T | IRAK3   | interleukin-1 receptor-associated kinase 3       | CCDS8975.1      | chr12_66638893-66638893_G_A  | 389E>K  | Substitution | Nonsynonymous coding | 19% |
| MM12T | IREB2   | iron-responsive element binding protein 2        | CCDS10302.1     | chr15_78768569-78768569_T_   | NA      | Deletion     | Frameshift           | 39% |
| MM12T | IRF2BP1 | interferon regulatory factor 2 binding protein 1 | CCDS12678.1     | chr19_46388467-46388467_C_T  | 189R>H  | Substitution | Nonsynonymous coding | 32% |
| MM12T | IRF4    | interferon regulatory factor 4                   | CCDS4469.1      | chr6_394873-394873_C_A       | 90P>H   | Substitution | Nonsynonymous coding | 22% |

|       |        |                                                                                    |                 |                               |         |              |                      |     |
|-------|--------|------------------------------------------------------------------------------------|-----------------|-------------------------------|---------|--------------|----------------------|-----|
| MM12T | IRF8   | interferon regulatory factor 8                                                     | CCDS10956.1     | chr16_85952190-85952190_G_A   | 257A>T  | Substitution | Nonsynonymous coding | 14% |
| MM12T | IRGQ   | immunity-related GTPase family, Q                                                  | CCDS33040.1     | chr19_44096710-44096710_C_T   | 447R>Q  | Substitution | Nonsynonymous coding | 36% |
| MM12T | IRGQ   | immunity-related GTPase family, Q                                                  | CCDS33040.1     | chr19_44097471-44097471_C_A   | 193E>D  | Substitution | Nonsynonymous coding | 31% |
| MM12T | IRS2   | insulin receptor substrate 2                                                       | CCDS9510.1      | chr13_110434905-110434905_C_T | 1166A>T | Substitution | Nonsynonymous coding | 11% |
| MM12T | IRS2   | insulin receptor substrate 2                                                       | CCDS9510.1      | chr13_110434788-110434788_G_A | 1205R>X | Substitution | Nonsense             | 31% |
| MM12T | IRS4   | insulin receptor substrate 4                                                       | CCDS14544.1     | chrX_107977633-107977633_T_G  | 648K>Q  | Substitution | Nonsynonymous coding | 40% |
| MM12T | IRX1   | iroquois homeobox 1                                                                | CCDS34132.1     | chr5_3600027-3600027_C_T      | 322T>I  | Substitution | Nonsynonymous coding | 42% |
| MM12T | IRX1   | iroquois homeobox 1                                                                | CCDS34132.1     | chr5_3600194-3600194_G_A      | 378A>T  | Substitution | Nonsynonymous coding | 34% |
| MM12T | IRX2   | iroquois homeobox 2                                                                | CCDS3868.1      | chr5_2748698-2748698_G_A      | 375S>L  | Substitution | Nonsynonymous coding | 31% |
| MM12T | IRX2   | iroquois homeobox 2                                                                | CCDS3868.1      | chr5_2749014-2749014_C_T      | 270D>N  | Substitution | Nonsynonymous coding | 10% |
| MM12T | IRX4   | iroquois homeobox 4                                                                | CCDS3867.1      | chr5_1878124-1878124_G_A      | 507L>F  | Substitution | Nonsynonymous coding | 31% |
| MM12T | ISM1   | isthmin 1 homolog (zebrafish)                                                      | CCDS46579.1     | chr20_13279717-13279717_G_A   | 336D>N  | Substitution | Nonsynonymous coding | 13% |
| MM12T | ISOC2  | isochorismatase domain containing 2                                                | CCDS12925.1     | chr19_55967059-55967059_G_A   | 98R>W   | Substitution | Nonsynonymous coding | 29% |
| MM12T | ISPD   | isoprenoid synthase domain containing                                              | CCDS47550.1     | chr7_16341066-16341066_G_A    | 272A>V  | Substitution | Nonsynonymous coding | 39% |
| MM12T | ISY1   | ISY1 splicing factor homolog (S. cerevisiae)                                       | CCDS43149.1     | chr3_128875703-128875703_G_A  | 47R>X   | Substitution | Nonsense             | 34% |
| MM12T | ITCH   | itchy E3 ubiquitin protein ligase                                                  | CCDS13234.1     | chr20_33026292-33026292_G_T   | 179G>X  | Substitution | Nonsense             | 18% |
| MM12T | ITFG2  | integrin alpha FG-GAP repeat containing 2                                          | CCDS8513.1      | chr12_2929914-2929914_G_A     | 191G>R  | Substitution | Nonsynonymous coding | 33% |
| MM12T | ITGA10 | integrin, alpha 10                                                                 | CCDS918.1       | chr1_145541907-145541907_C_A  | 1144L>M | Substitution | Nonsynonymous coding | 25% |
| MM12T | ITGA11 | integrin, alpha 11                                                                 | CCDS45291.1     | chr15_68657089-68657089_G_T   | 105L>I  | Substitution | Nonsynonymous coding | 23% |
| MM12T | ITGA2  | integrin, alpha 2 (CD49B, alpha 2 subunit of VLA-2 receptor)                       | CCDS3957.1      | chr5_52355728-52355728_G_A    | 400G>R  | Substitution | Nonsynonymous coding | 35% |
| MM12T | ITGA2  | integrin, alpha 2 (CD49B, alpha 2 subunit of VLA-2 receptor)                       | CCDS3957.1      | chr5_52356876-52356876_G_T    | 486Q>H  | Substitution | Nonsynonymous coding | 17% |
| MM12T | ITGA2  | integrin, alpha 2 (CD49B, alpha 2 subunit of VLA-2 receptor)                       | CCDS3957.1      | chr5_52370943-52370943_C_T    | 906A>V  | Substitution | Nonsynonymous coding | 15% |
| MM12T | ITGA2  | integrin, alpha 2 (CD49B, alpha 2 subunit of VLA-2 receptor)                       | CCDS3957.1      | chr5_52358762-52358763_AA_    | NA      | Deletion     | Splice site donor    | 22% |
| MM12T | ITGA5  | integrin, alpha 5 (fibronectin receptor, alpha polypeptide)                        | CCDS8880.1      | chr12_54798672-54798672_G_A   | 411A>V  | Substitution | Nonsynonymous coding | 37% |
| MM12T | ITGA6  | integrin, alpha 6                                                                  | ENST00000264106 | chr2_173337534-173337534_G_T  | 270D>Y  | Substitution | Nonsynonymous coding | 22% |
| MM12T | ITGA9  | integrin, alpha 9                                                                  | CCDS2669.1      | chr3_37512557-37512557_G_T    | 82G>V   | Substitution | Nonsynonymous coding | 26% |
| MM12T | ITGAD  | integrin, alpha D                                                                  | CCDS32438.1     | chr16_31422687-31422687_G_A   | 519R>H  | Substitution | Nonsynonymous coding | 28% |
| MM12T | ITGAD  | integrin, alpha D                                                                  | CCDS32438.1     | chr16_31435510-31435510_T_G   | 1083F>V | Substitution | Nonsynonymous coding | 29% |
| MM12T | ITGAD  | integrin, alpha D                                                                  | CCDS32438.1     | chr16_31435516-31435516_A_G   | 1085R>G | Substitution | Nonsynonymous coding | 36% |
| MM12T | ITGAL  | integrin, alpha L (antigen CD11A (p180), lymphocyte function-associated antigen 1; | CCDS32433.1     | chr16_30485582-30485582_A_G   | 43R>G   | Substitution | Nonsynonymous coding | 29% |
| MM12T | ITGAL  | integrin, alpha L (antigen CD11A (p180), lymphocyte function-associated antigen 1; | CCDS32433.1     | chr16_30500582-30500582_C_T   | 363A>V  | Substitution | Nonsynonymous coding | 33% |
| MM12T | ITGAL  | integrin, alpha L (antigen CD11A (p180), lymphocyte function-associated antigen 1; | CCDS32433.1     | chr16_30531217-30531217_C_T   | 1090L>F | Substitution | Nonsynonymous coding | 11% |

|       |               |                                                                             |                 |                               |         |              |                      |     |
|-------|---------------|-----------------------------------------------------------------------------|-----------------|-------------------------------|---------|--------------|----------------------|-----|
| MM12T | ITGAM         | integrin, alpha M (complement component 3 receptor 3 subunit)               | CCDS45470.1     | chr16_31277168-31277168_C_T   | 92S>F   | Substitution | Nonsynonymous coding | 30% |
| MM12T | ITGB1BP2      | integrin beta 1 binding protein (melusin) 2                                 | CCDS14411.1     | chrX_70523685-70523685_G_A    | 188G>D  | Substitution | Nonsynonymous coding | 18% |
| MM12T | ITGB3         | integrin, beta 3 (platelet glycoprotein IIIa, antigen CD61)                 | CCDS11511.1     | chr17_45369758-45369758_G_A   | 505R>H  | Substitution | Nonsynonymous coding | 11% |
| MM12T | ITIH2         | inter-alpha-trypsin inhibitor heavy chain 2                                 | CCDS31141.1     | chr10_7745410-7745410_A_T     | 5T>S    | Substitution | Nonsynonymous coding | 11% |
| MM12T | ITIH5         | inter-alpha-trypsin inhibitor heavy chain family, member 5                  | CCDS31139.1     | chr10_7621961-7621961_C_T     | 392G>D  | Substitution | Nonsynonymous coding | 28% |
| MM12T | ITIH6         | inter-alpha-trypsin inhibitor heavy chain family, member 6                  | CCDS14361.1     | chrX_54786350-54786350_G_A    | 305A>V  | Substitution | Nonsynonymous coding | 22% |
| MM12T | ITIH6         | inter-alpha-trypsin inhibitor heavy chain family, member 6                  | CCDS14361.1     | chrX_54817273-54817273_C_A    | 205A>S  | Substitution | Nonsynonymous coding | 24% |
| MM12T | ITM2A         | integral membrane protein 2A                                                | CCDS14444.1     | chrX_78618523-78618523_C_A    | 119E>D  | Substitution | Nonsynonymous coding | 31% |
| MM12T | ITPR1         | inositol 1,4,5-trisphosphate receptor, type 1                               | CCDS46740.1     | chr3_4821252-4821252_C_T      | 2056L>F | Substitution | Nonsynonymous coding | 13% |
| MM12T | ITPR1         | inositol 1,4,5-trisphosphate receptor, type 1                               | CCDS46740.1     | chr3_4703895-4703895_G_T      | 461E>X  | Substitution | Nonsense             | 36% |
| MM12T | ITPR3         | inositol 1,4,5-trisphosphate receptor, type 3                               | CCDS4783.1      | chr6_33631323-33631323_G_A    | 334G>E  | Substitution | Nonsynonymous coding | 21% |
| MM12T | ITPR3         | inositol 1,4,5-trisphosphate receptor, type 3                               | CCDS4783.1      | chr6_33656438-33656438_C_T    | 2192P>S | Substitution | Nonsynonymous coding | 41% |
| MM12T | ITPRIP        | inositol 1,4,5-trisphosphate receptor interacting protein                   | CCDS7557.1      | chr10_106074332-106074332_G_A | 493A>V  | Substitution | Nonsynonymous coding | 21% |
| MM12T | ITPRIP        | inositol 1,4,5-trisphosphate receptor interacting protein                   | CCDS7557.1      | chr10_106074840-106074840_C_T | 324A>T  | Substitution | Nonsynonymous coding | 35% |
| MM12T | ITSN2         | intersectin 2                                                               | CCDS1710.2      | chr2_24426500-24426500_G_T    | 1697L>M | Substitution | Nonsynonymous coding | 29% |
| MM12T | ITSN2         | intersectin 2                                                               | CCDS1710.2      | chr2_24431142-24431142_C_T    | 1548D>N | Substitution | Nonsynonymous coding | 11% |
| MM12T | ITSN2         | intersectin 2                                                               | CCDS1710.2      | chr2_24521687-24521687_A_     | NA      | Deletion     | Splice site acceptor | 20% |
| MM12T | JAK1          | Janus kinase 1                                                              | CCDS41346.1     | chr1_65335121-65335121_G_A    | 174R>X  | Substitution | Nonsense             | 14% |
| MM12T | JAK3          | Janus kinase 3                                                              | CCDS12366.1     | chr19_17950394-17950394_G_A   | 445R>X  | Substitution | Nonsense             | 37% |
| MM12T | JAKMIP1       | janus kinase and microtubule interacting protein 1                          | CCDS47005.1     | chr4_6050607-6050607_T_C      | 669T>A  | Substitution | Nonsynonymous coding | 28% |
| MM12T | JAKMIP1       | janus kinase and microtubule interacting protein 1                          | CCDS47005.1     | chr4_6087332-6087332_G_A      | 217R>C  | Substitution | Nonsynonymous coding | 15% |
| MM12T | JAKMIP2       | janus kinase and microtubule interacting protein 2                          | CCDS4285.1      | chr5_147030094-147030094_G_A  | 215A>V  | Substitution | Nonsynonymous coding | 13% |
| MM12T | JAKMIP3       | Janus kinase and microtubule interacting protein 3                          | CCDS44494.1     | chr10_133955443-133955443_C_T | 498T>M  | Substitution | Nonsynonymous coding | 34% |
| MM12T | JARID2        | jumonji, AT rich interactive domain 2                                       | CCDS4533.1      | chr6_15497029-15497029_C_T    | 525R>C  | Substitution | Nonsynonymous coding | 14% |
| MM12T | JARID2        | jumonji, AT rich interactive domain 2                                       | CCDS4533.1      | chr6_15513614-15513614_G_T    | 1137R>S | Substitution | Nonsynonymous coding | 14% |
| MM12T | JHDM1D        | jumonji C domain containing histone demethylase 1 homolog D (S. cerevisiae) | CCDS43658.1     | chr7_139826600-139826600_G_T  | 242P>H  | Substitution | Nonsynonymous coding | 27% |
| MM12T | JKAMP         | JNK1/MAPK8-associated membrane protein                                      | CCDS45116.1     | chr14_59961929-59961929_G_A   | 149A>T  | Substitution | Nonsynonymous coding | 32% |
| MM12T | JMJD4         | jumonji domain containing 4                                                 | CCDS1561.1      | chr1_227920667-227920667_C_T  | 341R>H  | Substitution | Nonsynonymous coding | 32% |
| MM12T | JMJD7-PLA2G4B | JMJD7-PLA2G4B readthrough                                                   | CCDS32202.1     | chr15_42133048-42133048_C_T   | 330A>V  | Substitution | Nonsynonymous coding | 17% |
| MM12T | JMJD7-PLA2G4B | JMJD7-PLA2G4B readthrough                                                   | CCDS32202.1     | chr15_42134427-42134427_G_A   | 451A>T  | Substitution | Nonsynonymous coding | 34% |
| MM12T | JRK           | jerky homolog (mouse) [Source:HGNC Symbol;Acc:6199]                         | ENST00000403360 | chr8_143747243-143747243_G_A  | 79R>C   | Substitution | Nonsynonymous coding | 12% |
| MM12T | KAL1          | Kallmann syndrome 1 sequence                                                | CCDS14130.1     | chrX_8504825-8504825_G_C      | 536C>W  | Substitution | Nonsynonymous coding | 38% |

|       |        |                                                                                                                          |             |                               |         |              |                      |     |
|-------|--------|--------------------------------------------------------------------------------------------------------------------------|-------------|-------------------------------|---------|--------------|----------------------|-----|
| MM12T | KALRN  | kalirin, RhoGEF kinase                                                                                                   | CCDS3027.1  | chr3_124132426-124132426_G_A  | 817R>Q  | Substitution | Nonsynonymous coding | 33% |
| MM12T | KALRN  | kalirin, RhoGEF kinase                                                                                                   | CCDS3028.1  | chr3_124351314-124351314_G_A  | 45V>M   | Substitution | Nonsynonymous coding | 16% |
| MM12T | KANSL2 | KAT8 regulatory NSL complex subunit 2                                                                                    | CCDS44869.1 | chr12_49054403-49054403_C_A   | ISV-1>  | Substitution | Splice site acceptor | 27% |
| MM12T | KANSL3 | KAT8 regulatory NSL complex subunit 3                                                                                    | CCDS46361.1 | chr2_97271186-97271186_G_A    | 602R>X  | Substitution | Nonsense             | 16% |
| MM12T | KARS   | lysyl-tRNA synthetase                                                                                                    | CCDS45532.1 | chr16_75674232-75674232_G_A   | 108R>C  | Substitution | Nonsynonymous coding | 10% |
| MM12T | KAT2B  | K(lysine) acetyltransferase 2B                                                                                           | CCDS2634.1  | chr3_20141399-20141399_G_A    | 208G>S  | Substitution | Nonsynonymous coding | 21% |
| MM12T | KAT6B  | K(lysine) acetyltransferase 6B                                                                                           | CCDS7345.1  | chr10_76789746-76789746_A_G   | 1722T>A | Substitution | Nonsynonymous coding | 37% |
| MM12T | KATNB1 | katanin p80 (WD repeat containing) subunit B<br>1                                                                        | CCDS10788.1 | chr16_57787330-57787330_G_A   | 359R>H  | Substitution | Nonsynonymous coding | 12% |
| MM12T | KAZN   | kazrin, periplakin interacting protein                                                                                   | CCDS152.2   | chr1_15430562-15430562_T_C    | 642V>A  | Substitution | Nonsynonymous coding | 31% |
| MM12T | KBTBD2 | kelch repeat and BTB (POZ) domain containing<br>2                                                                        | CCDS34614.1 | chr7_32909708-32909708_G_A    | 374S>F  | Substitution | Nonsynonymous coding | 10% |
| MM12T | KBTBD3 | kelch repeat and BTB (POZ) domain containing<br>3                                                                        | CCDS8334.1  | chr11_105924700-105924700_T_C | 239E>G  | Substitution | Nonsynonymous coding | 19% |
| MM12T | KBTBD6 | kelch repeat and BTB (POZ) domain containing<br>6                                                                        | CCDS9376.1  | chr13_41705170-41705170_C_T   | 493R>H  | Substitution | Nonsynonymous coding | 30% |
| MM12T | KBTBD6 | kelch repeat and BTB (POZ) domain containing<br>6                                                                        | CCDS9376.1  | chr13_41705386-41705386_C_T   | 421R>H  | Substitution | Nonsynonymous coding | 33% |
| MM12T | KCNA1  | potassium voltage-gated channel, shaker-<br>related subfamily, member 1 (episodic ataxia<br>related subfamily, member 1) | CCDS8535.1  | chr12_5020587-5020587_G_A     | 15A>T   | Substitution | Nonsynonymous coding | 34% |
| MM12T | KCNA4  | potassium voltage-gated channel, shaker-<br>related subfamily, member 4                                                  | CCDS41629.1 | chr11_30033012-30033012_T_C   | 405N>S  | Substitution | Nonsynonymous coding | 24% |
| MM12T | KCNAB2 | potassium voltage-gated channel, shaker-<br>related subfamily, beta member 2                                             | CCDS55.1    | chr1_6154549-6154549_C_T      | ISV+4>  | Substitution | Splice site donor    | 25% |
| MM12T | KCNB2  | potassium voltage-gated channel, Shab-related<br>subfamily, member 2                                                     | CCDS6209.1  | chr8_73848788-73848788_C_A    | 400L>M  | Substitution | Nonsynonymous coding | 40% |
| MM12T | KCNC1  | potassium voltage-gated channel, Shaw-<br>related subfamily, member 1                                                    | CCDS44547.1 | chr11_17757695-17757695_A_G   | 49D>G   | Substitution | Nonsynonymous coding | 14% |
| MM12T | KCNC1  | potassium voltage-gated channel, Shaw-<br>related subfamily, member 1                                                    | CCDS44547.1 | chr11_17757923-17757923_C_T   | 125A>V  | Substitution | Nonsynonymous coding | 40% |
| MM12T | KCNC2  | potassium voltage-gated channel, Shaw-<br>related subfamily, member 2                                                    | CCDS9007.1  | chr12_75444637-75444637_A_    | NA      | Deletion     | Frameshift           | 24% |
| MM12T | KCNC3  | potassium voltage-gated channel, Shaw-<br>related subfamily, member 3                                                    | CCDS12793.1 | chr19_50827047-50827047_G_A   | 388A>V  | Substitution | Nonsynonymous coding | 11% |
| MM12T | KCND1  | potassium voltage-gated channel, Shal-related<br>subfamily, member 1                                                     | CCDS14314.1 | chrX_48826278-48826278_T_C    | 134E>G  | Substitution | Nonsynonymous coding | 36% |
| MM12T | KCNF1  | potassium voltage-gated channel, subfamily F,<br>member 1                                                                | CCDS1676.1  | chr2_11053711-11053711_G_A    | 387A>T  | Substitution | Nonsynonymous coding | 30% |
| MM12T | KCG1   | potassium voltage-gated channel, subfamily G,<br>member 1                                                                | CCDS13436.1 | chr20_49626514-49626514_G_A   | 121P>L  | Substitution | Nonsynonymous coding | 32% |
| MM12T | KCG2   | potassium voltage-gated channel, subfamily G,<br>member 2                                                                | CCDS12019.1 | chr18_77623891-77623891_C_T   | 75P>L   | Substitution | Nonsynonymous coding | 39% |
| MM12T | KCG2   | potassium voltage-gated channel, subfamily G,<br>member 2                                                                | CCDS12019.1 | chr18_77623948-77623948_G_A   | 94R>Q   | Substitution | Nonsynonymous coding | 21% |
| MM12T | KCG2   | potassium voltage-gated channel, subfamily G,<br>member 2                                                                | CCDS12019.1 | chr18_77659208-77659208_T_A   | 265S>T  | Substitution | Nonsynonymous coding | 39% |
| MM12T | KCG4   | potassium voltage-gated channel, subfamily G,<br>member 4                                                                | CCDS10945.1 | chr16_84270389-84270389_C_T   | 235A>T  | Substitution | Nonsynonymous coding | 31% |
| MM12T | KCNH1  | potassium voltage-gated channel, subfamily H<br>(eag-related), member 1                                                  | CCDS1496.1  | chr1_211192294-211192294_C_T  | 288R>H  | Substitution | Nonsynonymous coding | 12% |
| MM12T | KCNH2  | potassium voltage-gated channel, subfamily H<br>(eag-related), member 2                                                  | CCDS5910.1  | chr7_150644551-150644551_C_T  | 1006G>D | Substitution | Nonsynonymous coding | 16% |
| MM12T | KCNH3  | potassium voltage-gated channel, subfamily H<br>(eag-related), member 3                                                  | CCDS8786.1  | chr12_49943259-49943259_G_A   | 502A>T  | Substitution | Nonsynonymous coding | 13% |
| MM12T | KCNH4  | potassium voltage-gated channel, subfamily H<br>(eag-related), member 4                                                  | CCDS11420.1 | chr17_40315939-40315939_G_A   | 721T>M  | Substitution | Nonsynonymous coding | 31% |

|       |        |                                                                                  |             |                               |         |              |                      |     |
|-------|--------|----------------------------------------------------------------------------------|-------------|-------------------------------|---------|--------------|----------------------|-----|
| MM12T | KCNH4  | potassium voltage-gated channel, subfamily H (eag-related), member 4             | CCDS11420.1 | chr17_40321647-40321647_G_A   | 480R>C  | Substitution | Nonsynonymous coding | 29% |
| MM12T | KCNH6  | potassium voltage-gated channel, subfamily H (eag-related), member 6             | CCDS11638.1 | chr17_61607793-61607793_G_A   | 189V>M  | Substitution | Nonsynonymous coding | 22% |
| MM12T | KCNH7  | potassium voltage-gated channel, subfamily H (eag-related), member 7             | CCDS2219.1  | chr2_163693235-163693235_G_A  | 40A>V   | Substitution | Nonsynonymous coding | 21% |
| MM12T | KCNH8  | potassium voltage-gated channel, subfamily H (eag-related), member 8             | CCDS2632.1  | chr3_19479714-19479714_G_     | NA      | Deletion     | Frameshift           | 23% |
| MM12T | KCNIP1 | Kv channel interacting protein 1                                                 | CCDS34286.1 | chr5_169931593-169931593_G_A  | 6G>D    | Substitution | Nonsynonymous coding | 18% |
| MM12T | KCNJ11 | potassium inwardly-rectifying channel, subfamily J, member 11                    | CCDS14436.1 | chr11_17408638-17408638_C_T   | 334G>D  | Substitution | Nonsynonymous coding | 27% |
| MM12T | KCNJ16 | potassium inwardly-rectifying channel, subfamily J, member 16                    | CCDS11687.1 | chr17_68128871-68128871_A_C   | 215T>P  | Substitution | Nonsynonymous coding | 33% |
| MM12T | KCNJ3  | potassium inwardly-rectifying channel, subfamily J, member 3                     | CCDS2200.1  | chr2_155555414-155555414_C_T  | 43R>W   | Substitution | Nonsynonymous coding | 19% |
| MM12T | KCNJ3  | potassium inwardly-rectifying channel, subfamily J, member 3                     | CCDS2200.1  | chr2_155555690-155555690_C_A  | 135L>I  | Substitution | Nonsynonymous coding | 27% |
| MM12T | KCNK10 | potassium channel, subfamily K, member 10                                        | CCDS9881.1  | chr14_88729854-88729854_C_T   | 32A>T   | Substitution | Nonsynonymous coding | 35% |
| MM12T | KCNK17 | potassium channel, subfamily K, member 17                                        | CCDS4842.1  | chr6_39271856-39271856_G_T    | 189L>I  | Substitution | Nonsynonymous coding | 23% |
| MM12T | KCNK5  | potassium channel, subfamily K, member 5                                         | CCDS4841.1  | chr6_39163672-39163672_G_A    | 93A>V   | Substitution | Nonsynonymous coding | 16% |
| MM12T | KCNN2  | potassium intermediate/small conductance calcium-activated channel, subfamily N, | CCDS4114.1  | chr5_113829168-113829168_A_T  | 484K>M  | Substitution | Nonsynonymous coding | 14% |
| MM12T | KCNN3  | potassium intermediate/small conductance calcium-activated channel, subfamily N, | CCDS30880.1 | chr1_154841641-154841641_C_T  | 267G>D  | Substitution | Nonsynonymous coding | 29% |
| MM12T | KCNQ1  | potassium voltage-gated channel, KQT-like subfamily, member 1                    | CCDS7736.1  | chr11_2608803-2608803_G_A     | 378A>T  | Substitution | Nonsynonymous coding | 14% |
| MM12T | KCNQ3  | potassium voltage-gated channel, KQT-like subfamily, member 3                    | CCDS34943.1 | chr8_133141909-133141909_G_A  | 740T>M  | Substitution | Nonsynonymous coding | 34% |
| MM12T | KCNQ3  | potassium voltage-gated channel, KQT-like subfamily, member 3                    | CCDS34943.1 | chr8_133153549-133153549_C_T  | 431R>H  | Substitution | Nonsynonymous coding | 25% |
| MM12T | KCNV2  | potassium channel, subfamily V, member 2                                         | CCDS6447.1  | chr9_2718511-2718511_G_A      | 258A>T  | Substitution | Nonsynonymous coding | 35% |
| MM12T | KCNV2  | potassium channel, subfamily V, member 2                                         | CCDS6447.1  | chr9_2718566-2718566_C_T      | 276A>V  | Substitution | Nonsynonymous coding | 12% |
| MM12T | KCTD3  | potassium channel tetramerisation domain containing 3                            | CCDS1515.1  | chr1_215792322-215792322_C_T  | 553R>C  | Substitution | Nonsynonymous coding | 41% |
| MM12T | KCTD7  | potassium channel tetramerisation domain containing 7                            | CCDS5534.1  | chr7_66103383-66103383_G_A    | 153R>H  | Substitution | Nonsynonymous coding | 12% |
| MM12T | KDELR1 | KDEL (Lys-Asp-Glu-Leu) endoplasmic reticulum protein retention receptor 1        | CCDS12718.1 | chr19_48887630-48887630_G_A   | 154A>V  | Substitution | Nonsynonymous coding | 33% |
| MM12T | KDM2B  | lysine (K)-specific demethylase 2B                                               | CCDS41850.1 | chr12_121877786-121877786_G_A | 1235R>C | Substitution | Nonsynonymous coding | 39% |
| MM12T | KDM3B  | lysine (K)-specific demethylase 3B                                               | CCDS34242.1 | chr5_137715358-137715358_G_T  | 222Q>H  | Substitution | Nonsynonymous coding | 29% |
| MM12T | KDM4B  | lysine (K)-specific demethylase 4B                                               | CCDS12138.1 | chr19_5144150-5144150_C_T     | 908S>L  | Substitution | Nonsynonymous coding | 33% |
| MM12T | KDM5A  | lysine (K)-specific demethylase 5A                                               | CCDS41736.1 | chr12_493313-493313_T_C       | 84T>A   | Substitution | Nonsynonymous coding | 37% |
| MM12T | KDM5C  | lysine (K)-specific demethylase 5C                                               | CCDS14351.1 | chrX_53228289-53228289_G_A    | 705R>C  | Substitution | Nonsynonymous coding | 36% |
| MM12T | KDM5C  | lysine (K)-specific demethylase 5C                                               | CCDS14351.1 | chrX_53239938-53239938_C_T    | 501W>X  | Substitution | Nonsense             | 28% |
| MM12T | KDM6A  | lysine (K)-specific demethylase 6A                                               | CCDS14265.1 | chrX_44966740-44966740_C_T    | 1322R>W | Substitution | Nonsynonymous coding | 16% |
| MM12T | KDR    | kinase insert domain receptor (a type III receptor tyrosine kinase)              | CCDS3497.1  | chr4_55968130-55968130_G_A    | 734L>F  | Substitution | Nonsynonymous coding | 13% |
| MM12T | KDSR   | 3-ketodihydrospingosine reductase                                                | CCDS11982.1 | chr18_61018243-61018243_G_A   | 163R>C  | Substitution | Nonsynonymous coding | 28% |
| MM12T | KEAP1  | kelch-like ECH-associated protein 1                                              | CCDS12239.1 | chr19_10602359-10602359_C_T   | 407A>T  | Substitution | Nonsynonymous coding | 24% |

|       |           |                                                                     |                 |                              |         |              |                      |     |
|-------|-----------|---------------------------------------------------------------------|-----------------|------------------------------|---------|--------------|----------------------|-----|
| MM12T | KEL       | Kell blood group, metallo-endopeptidase                             | CCDS34766.1     | chr7_142658194-142658194_G_A | ISV-3>  | Substitution | Splice site acceptor | 39% |
| MM12T | KHDRBS1   | KH domain containing, RNA binding, signal transduction associated 1 | CCDS350.1       | chr1_32495991-32495991_C_T   | 159R>X  | Substitution | Nonsense             | 27% |
| MM12T | KHNYN     | KH and NYN domain containing                                        | CCDS32058.1     | chr14_24900756-24900756_G_T  | 97G>C   | Substitution | Nonsynonymous coding | 29% |
| MM12T | KHSRP     | KH-type splicing regulatory protein                                 | CCDS45936.1     | chr19_6415433-6415433_G_A    | 642Q>X  | Substitution | Nonsense             | 12% |
| MM12T | KIAA0100  | KIAA0100                                                            | CCDS32595.1     | chr17_26960637-26960637_C_T  | 1132S>N | Substitution | Nonsynonymous coding | 36% |
| MM12T | KIAA0141  | KIAA0141                                                            | CCDS4268.1      | chr5_141309152-141309152_C_T | 140R>X  | Substitution | Nonsense             | 21% |
| MM12T | KIAA0146  | KIAA0146                                                            | CCDS43737.1     | chr8_48511707-48511707_C_T   | 498T>I  | Substitution | Nonsynonymous coding | 34% |
| MM12T | KIAA0195  | KIAA0195                                                            | CCDS32732.1     | chr17_73482013-73482013_G_T  | 69G>V   | Substitution | Nonsynonymous coding | 33% |
| MM12T | KIAA0195  | KIAA0195                                                            | CCDS32732.1     | chr17_73485732-73485732_C_A  | 315L>I  | Substitution | Nonsynonymous coding | 35% |
| MM12T | KIAA0195  | KIAA0195                                                            | CCDS32732.1     | chr17_73487170-73487170_T_C  | 390L>P  | Substitution | Nonsynonymous coding | 25% |
| MM12T | KIAA0195  | KIAA0195                                                            | CCDS32732.1     | chr17_73491371-73491371_G_A  | 912R>Q  | Substitution | Nonsynonymous coding | 21% |
| MM12T | KIAA0196  | KIAA0196                                                            | CCDS6355.1      | chr8_126056330-126056330_G_T | 892L>I  | Substitution | Nonsynonymous coding | 28% |
| MM12T | KIAA0226  | KIAA0226                                                            | CCDS43195.1     | chr3_197427592-197427592_G_A | 385R>C  | Substitution | Nonsynonymous coding | 30% |
| MM12T | KIAA0232  | KIAA0232                                                            | CCDS43209.1     | chr4_6865672-6865672_C_T     | 1188A>V | Substitution | Nonsynonymous coding | 19% |
| MM12T | KIAA0430  | KIAA0430                                                            | CCDS10562.2     | chr16_15727651-15727651_G    | NA      | Insertion    | Frameshift           | 29% |
| MM12T | KIAA0556  | KIAA0556                                                            | CCDS32415.1     | chr16_27786311-27786311_G_A  | 1452G>D | Substitution | Nonsynonymous coding | 33% |
| MM12T | KIAA0753  | KIAA0753                                                            | CCDS42247.1     | chr17_6524252-6524252_G_A    | 391R>W  | Substitution | Nonsynonymous coding | 29% |
| MM12T | KIAA0825  | KIAA0825                                                            | NM_001145678    | chr5_93731843-93731843_G_A   | 1087R>C | Substitution | Nonsynonymous coding | 29% |
| MM12T | KIAA0907  | KIAA0907                                                            | CCDS30885.1     | chr1_155893481-155893481_G_A | ISV-3>  | Substitution | Splice site acceptor | 34% |
| MM12T | KIAA1009  | KIAA1009                                                            | CCDS34494.2     | chr6_84872875-84872875_C_T   | 834A>T  | Substitution | Nonsynonymous coding | 22% |
| MM12T | KIAA1109  | KIAA1109                                                            | CCDS43267.1     | chr4_123183995-123183995_C_T | 2280A>V | Substitution | Nonsynonymous coding | 19% |
| MM12T | KIAA1109  | KIAA1109                                                            | CCDS43267.1     | chr4_123109047-123109047_T_A | ISV-3>  | Substitution | Splice site acceptor | 33% |
| MM12T | KIAA1161  | KIAA1161                                                            | ENST00000297625 | chr9_34372347-34372347_G_A   | 165R>C  | Substitution | Nonsynonymous coding | 32% |
| MM12T | KIAA1199  | KIAA1199                                                            | CCDS10315.1     | chr15_81188327-81188327_A_G  | 446Y>C  | Substitution | Nonsynonymous coding | 16% |
| MM12T | KIAA1211  | KIAA1211                                                            | CCDS43230.1     | chr4_57181628-57181628_C_A   | 654P>T  | Substitution | Nonsynonymous coding | 32% |
| MM12T | KIAA1211  | KIAA1211                                                            | CCDS43230.1     | chr4_57181772-57181772_C_T   | 702R>W  | Substitution | Nonsynonymous coding | 16% |
| MM12T | KIAA1211L | KIAA1211-like                                                       | CCDS42720.1     | chr2_99438905-99438905_C_T   | 611A>T  | Substitution | Nonsynonymous coding | 38% |
| MM12T | KIAA1211L | KIAA1211-like                                                       | CCDS42720.1     | chr2_99439465-99439465_G_A   | 424A>V  | Substitution | Nonsynonymous coding | 33% |
| MM12T | KIAA1211L | KIAA1211-like                                                       | CCDS42720.1     | chr2_99439804-99439804_C_T   | 311R>H  | Substitution | Nonsynonymous coding | 14% |
| MM12T | KIAA1217  | KIAA1217                                                            | CCDS31165.1     | chr10_24809089-24809089_T_G  | 739S>A  | Substitution | Nonsynonymous coding | 17% |
| MM12T | KIAA1244  | KIAA1244                                                            | CCDS5189.2      | chr6_138584623-138584623_C_T | 668A>V  | Substitution | Nonsynonymous coding | 20% |
| MM12T | KIAA1279  | KIAA1279                                                            | CCDS7284.1      | chr10_70775815-70775815__A   | NA      | Insertion    | Frameshift           | 15% |

|       |           |                           |                 |                              |         |              |                      |     |
|-------|-----------|---------------------------|-----------------|------------------------------|---------|--------------|----------------------|-----|
| MM12T | KIAA1324L | KIAA1324-like             | CCDS47632.1     | chr7_86574345-86574345_C_T   | 175R>H  | Substitution | Nonsynonymous coding | 36% |
| MM12T | KIAA1429  | KIAA1429                  | CCDS34923.1     | chr8_95501010-95501010_C_T   | 1788G>D | Substitution | Nonsynonymous coding | 26% |
| MM12T | KIAA1549  | KIAA1549                  | CCDS47723.1     | chr7_138596000-138596000_C_T | 963V>I  | Substitution | Nonsynonymous coding | 10% |
| MM12T | KIAA1614  | KIAA1614                  | CCDS41442.1     | chr1_180897616-180897616_C_T | 371A>V  | Substitution | Nonsynonymous coding | 32% |
| MM12T | KIAA1644  | KIAA1644                  | CCDS43025.1     | chr22_44696786-44696786_C_T  | 14V>I   | Substitution | Nonsynonymous coding | 13% |
| MM12T | KIAA1683  | KIAA1683                  | CCDS46017.1     | chr19_18377627-18377627_C_A  | 241Q>H  | Substitution | Nonsynonymous coding | 14% |
| MM12T | KIAA1731  | KIAA1731                  | CCDS44708.1     | chr11_93430347-93430347_G_A  | 757A>T  | Substitution | Nonsynonymous coding | 11% |
| MM12T | KIAA1731  | KIAA1731                  | CCDS44708.1     | chr11_93432841-93432841_G_T  | 1588R>I | Substitution | Nonsynonymous coding | 12% |
| MM12T | KIAA1731  | KIAA1731                  | CCDS44708.1     | chr11_93436042-93436042_A_G  | 1851I>M | Substitution | Nonsynonymous coding | 11% |
| MM12T | KIAA1755  | KIAA1755                  | CCDS33467.1     | chr20_36841598-36841598_C_T  | 1150R>H | Substitution | Nonsynonymous coding | 21% |
| MM12T | KIAA1958  | KIAA1958                  | CCDS35108.1     | chr9_115337082-115337082_A_G | 241H>R  | Substitution | Nonsynonymous coding | 38% |
| MM12T | KIAA2022  | KIAA2022                  | CCDS35337.1     | chrX_73960698-73960698_T_C   | 1232I>V | Substitution | Nonsynonymous coding | 36% |
| MM12T | KIAA2022  | KIAA2022                  | CCDS35337.1     | chrX_73961202-73961202_G_A   | 1064R>C | Substitution | Nonsynonymous coding | 25% |
| MM12T | KIF11     | kinesin family member 11  | CCDS7422.1      | chr10_94408036-94408036_C_T  | 872A>V  | Substitution | Nonsynonymous coding | 11% |
| MM12T | KIF12     | kinesin family member 12  | CCDS6801.1      | chr9_116855607-116855607_G_A | 362P>S  | Substitution | Nonsynonymous coding | 27% |
| MM12T | KIF13B    | kinesin family member 13B | NM_015254       | chr8_28929413-28929413_C_T   | 1648V>I | Substitution | Nonsynonymous coding | 27% |
| MM12T | KIF13B    | kinesin family member 13B | NM_015254       | chr8_28980935-28980935_C_T   | 1143A>T | Substitution | Nonsynonymous coding | 25% |
| MM12T | KIF1A     | kinesin family member 1A  | CCDS46561.1     | chr2_241666352-241666352_A_C | 1237F>C | Substitution | Nonsynonymous coding | 47% |
| MM12T | KIF1A     | kinesin family member 1A  | ENST00000373308 | chr2_241696785-241696785_C_T | 937G>S  | Substitution | Nonsynonymous coding | 23% |
| MM12T | KIF1B     | kinesin family member 1B  | CCDS111.1       | chr1_10327507-10327507_C_T   | 167R>C  | Substitution | Nonsynonymous coding | 24% |
| MM12T | KIF1C     | kinesin family member 1C  | CCDS11065.1     | chr17_4925544-4925544_G_A    | 723R>H  | Substitution | Nonsynonymous coding | 28% |
| MM12T | KIF20B    | kinesin family member 20B | CCDS7407.1      | chr10_91483748-91483748__A   | NA      | Insertion    | Frameshift           | 29% |
| MM12T | KIF21A    | kinesin family member 21A | CCDS31773.1     | chr12_39734809-39734809_C_T  | 657R>K  | Substitution | Nonsynonymous coding | 22% |
| MM12T | KIF21A    | kinesin family member 21A | CCDS31773.1     | chr12_39735909-39735909_T_C  | 564D>G  | Substitution | Nonsynonymous coding | 19% |
| MM12T | KIF21B    | kinesin family member 21B | CCDS30965.1     | chr1_200954050-200954050_C_T | 1247R>H | Substitution | Nonsynonymous coding | 14% |
| MM12T | KIF21B    | kinesin family member 21B | CCDS30965.1     | chr1_200978078-200978078_G_A | 89T>M   | Substitution | Nonsynonymous coding | 27% |
| MM12T | KIF22     | kinesin family member 22  | CCDS10653.1     | chr16_29814110-29814110_G_A  | 434S>N  | Substitution | Nonsynonymous coding | 37% |
| MM12T | KIF26B    | kinesin family member 26B | CCDS44342.1     | chr1_245848720-245848720_C_T | 812S>L  | Substitution | Nonsynonymous coding | 33% |
| MM12T | KIF26B    | kinesin family member 26B | CCDS44342.1     | chr1_245849098-245849098_G_A | 938G>D  | Substitution | Nonsynonymous coding | 38% |
| MM12T | KIF26B    | kinesin family member 26B | CCDS44342.1     | chr1_245850940-245850940_G_A | 1552S>N | Substitution | Nonsynonymous coding | 31% |
| MM12T | KIF26B    | kinesin family member 26B | CCDS44342.1     | chr1_245861434-245861434_G_T | 1951A>S | Substitution | Nonsynonymous coding | 28% |
| MM12T | KIF27     | kinesin family member 27  | CCDS6665.1      | chr9_86517974-86517974_C_T   | ISV+1>  | Substitution | Splice site donor    | 22% |



|       |         |                                                               |             |                               |        |              |                      |     |
|-------|---------|---------------------------------------------------------------|-------------|-------------------------------|--------|--------------|----------------------|-----|
| MM12T | KIF3C   | kinesin family member 3C                                      | CCDS1719.1  | chr2_26203558-26203558_C_T    | 410R>H | Substitution | Nonsynonymous coding | 28% |
| MM12T | KIF4A   | kinesin family member 4A                                      | CCDS14401.1 | chrX_69573637-69573637_C_A    | 552P>T | Substitution | Nonsynonymous coding | 11% |
| MM12T | KIF5A   | kinesin family member 5A                                      | CCDS8945.1  | chr12_57957469-57957469_C_T   | 95T>I  | Substitution | Nonsynonymous coding | 21% |
| MM12T | KIF5C   | kinesin family member 5C                                      | NM_004522   | chr2_149803536-149803536_A_C  | 238K>T | Substitution | Nonsynonymous coding | 21% |
| MM12T | KIF6    | kinesin family member 6                                       | CCDS4844.1  | chr6_39507966-39507966_C_A    | 486K>N | Substitution | Nonsynonymous coding | 21% |
| MM12T | KIF7    | kinesin family member 7                                       | CCDS32325.2 | chr15_90192289-90192289_A_G   | 280L>P | Substitution | Nonsynonymous coding | 38% |
| MM12T | KIFAP3  | kinesin-associated protein 3                                  | CCDS1288.1  | chr1_169947226-169947226_G_A  | 633Q>X | Substitution | Nonsense             | 42% |
| MM12T | KIN     | KIN, antigenic determinant of recA protein homolog (mouse)    | CCDS7080.1  | chr10_7804523-7804523_T_C     | ISV-4> | Substitution | Splice site acceptor | 27% |
| MM12T | KIRREL3 | kin of IRRE like 3 (Drosophila)                               | NM_032531   | chr11_126343265-126343265_G_T | 177P>H | Substitution | Nonsynonymous coding | 23% |
| MM12T | KIT     | v-kit Hardy-Zuckerman 4 feline sarcoma viral oncogene homolog | CCDS3496.1  | chr4_55561875-55561875_G_T    | 89A>S  | Substitution | Nonsynonymous coding | 23% |
| MM12T | KLC1    | kinesin light chain 1                                         | CCDS45168.1 | chr14_104145821-104145821_T_A | 530V>D | Substitution | Nonsynonymous coding | 28% |
| MM12T | KLC2    | kinesin light chain 2                                         | CCDS8130.1  | chr11_66031910-66031910_T_C   | 404V>A | Substitution | Nonsynonymous coding | 13% |
| MM12T | KLC3    | kinesin light chain 3                                         | CCDS12660.2 | chr19_45852074-45852074_G_A   | ISV-4> | Substitution | Splice site acceptor | 31% |
| MM12T | KLF10   | Kruppel-like factor 10                                        | CCDS6294.1  | chr8_103663484-103663484_G_T  | 359P>H | Substitution | Nonsynonymous coding | 38% |
| MM12T | KLF15   | Kruppel-like factor 15                                        | CCDS3036.1  | chr3_126070822-126070822_G_A  | 315A>V | Substitution | Nonsynonymous coding | 34% |
| MM12T | KLF4    | Kruppel-like factor 4 (gut)                                   | CCDS6770.2  | chr9_110249621-110249621_G_T  | 352L>M | Substitution | Nonsynonymous coding | 12% |
| MM12T | KLF8    | Kruppel-like factor 8                                         | CCDS14373.1 | chrX_56296701-56296701_G_T    | 282S>I | Substitution | Nonsynonymous coding | 34% |
| MM12T | KLHDC10 | kelch domain containing 10                                    | CCDS5815.1  | chr7_129764295-129764295_C_T  | 262R>X | Substitution | Nonsense             | 13% |
| MM12T | KLHDC7B | kelch domain containing 7B                                    | CCDS14097.2 | chr22_50987010-50987010_G_A   | 139A>T | Substitution | Nonsynonymous coding | 39% |
| MM12T | KLHDC7B | kelch domain containing 7B                                    | CCDS14097.2 | chr22_50987845-50987845_G_T   | 417S>I | Substitution | Nonsynonymous coding | 27% |
| MM12T | KLHDC7B | kelch domain containing 7B                                    | CCDS14097.2 | chr22_50987887-50987887_G_A   | 431R>H | Substitution | Nonsynonymous coding | 38% |
| MM12T | KLHL12  | kelch-like family member 12                                   | CCDS1429.1  | chr1_202894137-202894137_C_T  | 52A>T  | Substitution | Nonsynonymous coding | 20% |
| MM12T | KLHL13  | kelch-like family member 13                                   | CCDS14571.1 | chrX_117033092-117033092_C_T  | 583A>T | Substitution | Nonsynonymous coding | 39% |
| MM12T | KLHL14  | kelch-like family member 14                                   | CCDS32813.1 | chr18_30260411-30260411_G_T   | 464H>N | Substitution | Nonsynonymous coding | 15% |
| MM12T | KLHL15  | kelch-like family member 15                                   | CCDS35217.1 | chrX_24006075-24006075_G_A    | 593P>L | Substitution | Nonsynonymous coding | 30% |
| MM12T | KLHL17  | kelch-like family member 17                                   | CCDS30550.1 | chr1_900374-900374_T_C        | 578W>R | Substitution | Nonsynonymous coding | 36% |
| MM12T | KLHL2   | kelch-like family member 2                                    | CCDS34094.1 | chr4_166235226-166235226_G_A  | 506G>D | Substitution | Nonsynonymous coding | 29% |
| MM12T | KLHL20  | kelch-like family member 20                                   | CCDS1310.1  | chr1_173743577-173743577_G_A  | 477V>M | Substitution | Nonsynonymous coding | 38% |
| MM12T | KLHL22  | kelch-like family member 22                                   | CCDS13779.1 | chr22_20783827-20783827_G_A   | 474R>C | Substitution | Nonsynonymous coding | 30% |
| MM12T | KLHL24  | kelch-like 24 (Drosophila)                                    | CCDS3246.1  | chr3_183396974-183396974_C_T  | 568A>V | Substitution | Nonsynonymous coding | 31% |
| MM12T | KLHL24  | kelch-like 24 (Drosophila)                                    | CCDS3246.1  | chr3_183397046-183397046_G_A  | 592R>K | Substitution | Nonsynonymous coding | 12% |
| MM12T | KLHL29  | kelch-like 29 (Drosophila)                                    | NM_052920   | chr2_23918956-23918956_G_A    | 626R>H | Substitution | Nonsynonymous coding | 27% |

|       |           |                                                        |                 |                               |         |              |                      |     |
|-------|-----------|--------------------------------------------------------|-----------------|-------------------------------|---------|--------------|----------------------|-----|
| MM12T | KLHL3     | kelch-like family member 3                             | CCDS4192.1      | chr5_137056154-137056154_C_A  | 45S>I   | Substitution | Nonsynonymous coding | 42% |
| MM12T | KLHL31    | kelch-like 31 (Drosophila)                             | CCDS34478.1     | chr6_53519199-53519199_G_A    | 291A>V  | Substitution | Nonsynonymous coding | 45% |
| MM12T | KLHL34    | kelch-like 34 (Drosophila)                             | CCDS14199.1     | chrX_21674826-21674826_C_T    | 361V>M  | Substitution | Nonsynonymous coding | 31% |
| MM12T | KLHL35    | kelch-like 35 (Drosophila)                             | CCDS44685.1     | chr11_75133742-75133742_C_A   | 325S>I  | Substitution | Nonsynonymous coding | 21% |
| MM12T | KLHL38    | kelch-like 38 (Drosophila)                             | CCDS43766.1     | chr8_124659190-124659190_G_A  | 472A>V  | Substitution | Nonsynonymous coding | 32% |
| MM12T | KLHL38    | kelch-like 38 (Drosophila)                             | CCDS43766.1     | chr8_124664522-124664522_C_T  | 215M>I  | Substitution | Nonsynonymous coding | 24% |
| MM12T | KLHL4     | kelch-like family member 4                             | CCDS14456.1     | chrX_86873010-86873010_T_C    | 268I>T  | Substitution | Nonsynonymous coding | 22% |
| MM12T | KLHL4     | kelch-like family member 4                             | CCDS14456.1     | chrX_86888814-86888814_A_G    | 539T>A  | Substitution | Nonsynonymous coding | 29% |
| MM12T | KLHL40    | kelch-like 40 (Drosophila)                             | CCDS2703.1      | chr3_42729686-42729686_G_A    | 402R>H  | Substitution | Nonsynonymous coding | 12% |
| MM12T | KLK14     | kallikrein-related peptidase 14                        | CCDS12823.2     | chr19_51581280-51581280_G_A   | 263T>M  | Substitution | Nonsynonymous coding | 32% |
| MM12T | KLK9      | kallikrein-related peptidase 9                         | CCDS12816.1     | chr19_51506426-51506426_C_T   | 232A>T  | Substitution | Nonsynonymous coding | 27% |
| MM12T | KLRC1     | killer cell lectin-like receptor subfamily C, member 1 | CCDS8625.1      | chr12_10603606-10603606_C_A   | 50Q>H   | Substitution | Nonsynonymous coding | 28% |
| MM12T | KLRG2     | killer cell lectin-like receptor subfamily G, member 2 | CCDS5854.1      | chr7_139168226-139168226_C_A  | 55E>X   | Substitution | Nonsense             | 29% |
| MM12T | KNDC1     | kinase non-catalytic C-lobe domain (KIND) containing 1 | CCDS7674.1      | chr10_135015371-135015371_C_T | 1119A>V | Substitution | Nonsynonymous coding | 16% |
| MM12T | KPNA6     | karyopherin alpha 6 (importin alpha 7)                 | CCDS352.1       | chr1_32620245-32620245_G_A    | 21A>T   | Substitution | Nonsynonymous coding | 30% |
| MM12T | KPNB1     | karyopherin (importin) beta 1                          | CCDS11513.1     | chr17_45741584-45741584_C_A   | 282F>L  | Substitution | Nonsynonymous coding | 29% |
| MM12T | KPNB1     | karyopherin (importin) beta 1                          | CCDS11513.1     | chr17_45750485-45750485_C_T   | 550T>M  | Substitution | Nonsynonymous coding | 24% |
| MM12T | KREMEN2   | kringle containing transmembrane protein 2             | CCDS10483.1     | chr16_3016979-3016979_G_A     | 237D>N  | Substitution | Nonsynonymous coding | 30% |
| MM12T | KRI1      | KRI1 homolog (S. cerevisiae)                           | CCDS12242.1     | chr19_10670064-10670064_C_T   | 395D>N  | Substitution | Nonsynonymous coding | 40% |
| MM12T | KRT10     | keratin 10                                             | CCDS11377.1     | chr17_38978491-38978491_C_T   | 116S>N  | Substitution | Nonsynonymous coding | 38% |
| MM12T | KRT28     | keratin 28                                             | CCDS11376.1     | chr17_38953238-38953238_C_T   | 303R>Q  | Substitution | Nonsynonymous coding | 12% |
| MM12T | KRT35     | keratin 35                                             | CCDS11394.2     | chr17_39637124-39637124_C_A   | 76G>C   | Substitution | Nonsynonymous coding | 14% |
| MM12T | KRT7      | keratin 7                                              | CCDS8822.1      | chr12_52629117-52629117_G_A   | 168S>N  | Substitution | Nonsynonymous coding | 11% |
| MM12T | KRT71     | keratin 71                                             | CCDS8831.1      | chr12_52946660-52946660_C_A   | 68G>C   | Substitution | Nonsynonymous coding | 29% |
| MM12T | KRT73     | keratin 73                                             | CCDS8834.1      | chr12_53012245-53012245_C_T   | 22A>T   | Substitution | Nonsynonymous coding | 16% |
| MM12T | KRT82     | keratin 82                                             | CCDS8826.1      | chr12_52794378-52794378_G_A   | 237A>V  | Substitution | Nonsynonymous coding | 12% |
| MM12T | KRTAP16-1 | keratin associated protein 16-1                        | ENST00000391352 | chr17_39465202-39465202_A_G   | 102S>P  | Substitution | Nonsynonymous coding | 34% |
| MM12T | KRTAP5-1  | keratin associated protein 5-1                         | CCDS31330.1     | chr11_1605763-1605763_G_T     | 239C>X  | Substitution | Nonsense             | 21% |
| MM12T | KRTCAP3   | keratinocyte associated protein 3                      | CCDS1754.1      | chr2_27665613-27665613_G_A    | 66V>I   | Substitution | Nonsynonymous coding | 33% |
| MM12T | KSR2      | kinase suppressor of ras 2                             | NM_173598       | chr12_118105333-118105333_C_T | 344A>T  | Substitution | Nonsynonymous coding | 17% |
| MM12T | KSR2      | kinase suppressor of ras 2                             | NM_173598       | chr12_118198873-118198873_C_T | 281R>Q  | Substitution | Nonsynonymous coding | 10% |
| MM12T | KTN1      | kinectin 1 (kinesin receptor)                          | CCDS41957.1     | chr14_56103987-56103987_G_A   | 541V>I  | Substitution | Nonsynonymous coding | 27% |

|       |         |                                                            |             |                              |         |              |                      |     |
|-------|---------|------------------------------------------------------------|-------------|------------------------------|---------|--------------|----------------------|-----|
| MM12T | L3HYPDH | L-3-hydroxyproline dehydratase (trans-)                    | CCDS9739.1  | chr14_59950677-59950677_G_A  | 120L>F  | Substitution | Nonsynonymous coding | 11% |
| MM12T | L3MBTL1 | l(3)mbt-like 1 (Drosophila)                                | CCDS13319.1 | chr20_42144821-42144821_C_T  | ISV+4>  | Substitution | Splice site donor    | 28% |
| MM12T | L3MBTL2 | l(3)mbt-like 2 (Drosophila)                                | CCDS14011.1 | chr22_41620741-41620741_A_G  | 396D>G  | Substitution | Nonsynonymous coding | 40% |
| MM12T | L3MBTL3 | l(3)mbt-like 3 (Drosophila)                                | CCDS34537.1 | chr6_130387570-130387570_G_A | 313A>T  | Substitution | Nonsynonymous coding | 27% |
| MM12T | L3MBTL4 | l(3)mbt-like 4 (Drosophila)                                | CCDS11839.2 | chr18_6243388-6243388_A_G    | 122L>S  | Substitution | Nonsynonymous coding | 10% |
| MM12T | LAG3    | lymphocyte-activation gene 3                               | CCDS8561.1  | chr12_6884477-6884477_G_A    | 274A>T  | Substitution | Nonsynonymous coding | 10% |
| MM12T | LAMA1   | laminin, alpha 1                                           | CCDS32787.1 | chr18_6943232-6943232_G_A    | 3005T>I | Substitution | Nonsynonymous coding | 34% |
| MM12T | LAMA2   | laminin, alpha 2                                           | CCDS5138.1  | chr6_129513940-129513940_G_A | 575R>Q  | Substitution | Nonsynonymous coding | 11% |
| MM12T | LAMA2   | laminin, alpha 2                                           | CCDS5138.1  | chr6_129486720-129486720_G_T | ISV-1>  | Substitution | Splice site acceptor | 29% |
| MM12T | LAMA2   | laminin, alpha 2                                           | CCDS5138.1  | chr6_129621928-129621928_C_T | 1029R>X | Substitution | Nonsense             | 49% |
| MM12T | LAMA3   | laminin, alpha 3                                           | CCDS42419.1 | chr18_21451564-21451564_G_A  | 1646R>H | Substitution | Nonsynonymous coding | 15% |
| MM12T | LAMA5   | laminin, alpha 5                                           | CCDS33502.1 | chr20_60887336-60887336_G_T  | 3133L>I | Substitution | Nonsynonymous coding | 32% |
| MM12T | LAMA5   | laminin, alpha 5                                           | CCDS33502.1 | chr20_60893526-60893526_C_T  | 2408R>H | Substitution | Nonsynonymous coding | 30% |
| MM12T | LAMA5   | laminin, alpha 5                                           | CCDS33502.1 | chr20_60900562-60900562_C_T  | 1780R>H | Substitution | Nonsynonymous coding | 12% |
| MM12T | LAMA5   | laminin, alpha 5                                           | CCDS33502.1 | chr20_60903938-60903938_C_T  | 1470R>H | Substitution | Nonsynonymous coding | 28% |
| MM12T | LAMA5   | laminin, alpha 5                                           | CCDS33502.1 | chr20_60905634-60905634_C_T  | 1297G>S | Substitution | Nonsynonymous coding | 34% |
| MM12T | LAMA5   | laminin, alpha 5                                           | CCDS33502.1 | chr20_60906088-60906088_C_T  | 1217S>N | Substitution | Nonsynonymous coding | 24% |
| MM12T | LAMA5   | laminin, alpha 5                                           | CCDS33502.1 | chr20_60908142-60908142_G_A  | ISV+4>  | Substitution | Splice site donor    | 18% |
| MM12T | LAMB1   | laminin, beta 1                                            | CCDS5750.1  | chr7_107580533-107580533_T_C | 1221D>G | Substitution | Nonsynonymous coding | 29% |
| MM12T | LAMB2   | laminin, beta 2 (laminin 5)                                | CCDS2789.1  | chr3_49166548-49166548_G_A   | 546H>Y  | Substitution | Nonsynonymous coding | 26% |
| MM12T | LAMB2   | laminin, beta 2 (laminin 5)                                | CCDS2789.1  | chr3_49169032-49169032_C_T   | 195R>Q  | Substitution | Nonsynonymous coding | 36% |
| MM12T | LAMB3   | laminin, beta 3                                            | CCDS1487.1  | chr1_209807808-209807808_C_T | 183R>H  | Substitution | Nonsynonymous coding | 11% |
| MM12T | LAMC1   | laminin, gamma 1 (formerly LAMB2)                          | CCDS1351.1  | chr1_183102642-183102642_C_T | 1269A>V | Substitution | Nonsynonymous coding | 30% |
| MM12T | LAMC3   | laminin, gamma 3                                           | CCDS6938.1  | chr9_133960983-133960983_G_T | 1368R>I | Substitution | Nonsynonymous coding | 13% |
| MM12T | LAMP5   | lysosomal-associated membrane protein family, member 5     | CCDS13106.1 | chr20_9496933-9496933_G_A    | 134A>T  | Substitution | Nonsynonymous coding | 37% |
| MM12T | LANCL1  | LanC lantibiotic synthetase component C-like 1 (bacterial) | CCDS2392.1  | chr2_211302551-211302551_G_A | 246P>S  | Substitution | Nonsynonymous coding | 14% |
| MM12T | LANCL1  | LanC lantibiotic synthetase component C-like 1 (bacterial) | CCDS2392.1  | chr2_211320042-211320042_A_  | NA      | Deletion     | Splice site acceptor | 13% |
| MM12T | LARP4B  | La ribonucleoprotein domain family, member 4B              | CCDS31131.1 | chr10_863685-863685_T_A      | 559I>L  | Substitution | Nonsynonymous coding | 30% |
| MM12T | LARP4B  | La ribonucleoprotein domain family, member 4B              | CCDS31131.1 | chr10_909820-909820_G_A      | 98S>L   | Substitution | Nonsynonymous coding | 19% |
| MM12T | LARP4B  | La ribonucleoprotein domain family, member 4B              | CCDS31131.1 | chr10_930446-930446_T_C      | 28M>V   | Substitution | Nonsynonymous coding | 17% |
| MM12T | LARP7   | La ribonucleoprotein domain family, member 7               | CCDS3701.2  | chr4_113574380-113574380_G_A | 522E>K  | Substitution | Nonsynonymous coding | 23% |
| MM12T | LAX1    | lymphocyte transmembrane adaptor 1                         | CCDS1441.2  | chr1_203740006-203740006_C_T | 47A>V   | Substitution | Nonsynonymous coding | 33% |

|       |         |                                                                     |                 |                               |        |              |                      |     |
|-------|---------|---------------------------------------------------------------------|-----------------|-------------------------------|--------|--------------|----------------------|-----|
| MM12T | LAX1    | lymphocyte transmembrane adaptor 1                                  | CCDS1441.2      | chr1_203741220-203741220_G_A  | 112R>H | Substitution | Nonsynonymous coding | 36% |
| MM12T | LCAT    | lecithin-cholesterol acyltransferase                                | CCDS10854.1     | chr16_67977938-67977938_C_T   | 23A>T  | Substitution | Nonsynonymous coding | 32% |
| MM12T | LCE3C   | late cornified envelope 3C                                          | CCDS1015.1      | chr1_152573407-152573407_G_A  | 67R>H  | Substitution | Nonsynonymous coding | 14% |
| MM12T | LCK     | lymphocyte-specific protein tyrosine kinase                         | CCDS359.1       | chr1_32740365-32740365_C_T    | 45R>W  | Substitution | Nonsynonymous coding | 15% |
| MM12T | LCK     | lymphocyte-specific protein tyrosine kinase                         | CCDS359.1       | chr1_32745797-32745797_G_A    | 438R>H | Substitution | Nonsynonymous coding | 39% |
| MM12T | LCMT1   | leucine carboxyl methyltransferase 1                                | CCDS45445.1     | chr16_25172440-25172440_T_C   | 162S>P | Substitution | Nonsynonymous coding | 21% |
| MM12T | LCMT1   | leucine carboxyl methyltransferase 1                                | CCDS45445.1     | chr16_25182080-25182080_G_A   | 280D>N | Substitution | Nonsynonymous coding | 13% |
| MM12T | LCN15   | lipocalin 15                                                        | CCDS7006.1      | chr9_139657865-139657865_A_G  | 121V>A | Substitution | Nonsynonymous coding | 23% |
| MM12T | LCN9    | lipocalin 9                                                         | ENST00000277526 | chr9_138556099-138556099_T_C  | 63I>T  | Substitution | Nonsynonymous coding | 23% |
| MM12T | LCN9    | lipocalin 9                                                         | ENST00000277526 | chr9_138557754-138557754_C_T  | 189R>C | Substitution | Nonsynonymous coding | 20% |
| MM12T | LCP1    | lymphocyte cytosolic protein 1 (L-plastin)                          | CCDS9403.1      | chr13_46732656-46732656_C_T   | ISV+1> | Substitution | Splice site donor    | 38% |
| MM12T | LCT     | lactase                                                             | CCDS2178.1      | chr2_136579651-136579651_C_T  | 309V>M | Substitution | Nonsynonymous coding | 43% |
| MM12T | LCTL    | lactase-like                                                        | CCDS10220.1     | chr15_66855937-66855937_C_T   | 133E>K | Substitution | Nonsynonymous coding | 39% |
| MM12T | LCTL    | lactase-like                                                        | CCDS10220.1     | chr15_66844110-66844110_C_A   | 472G>X | Substitution | Nonsense             | 29% |
| MM12T | LDHD    | lactate dehydrogenase D                                             | CCDS10913.1     | chr16_75147459-75147459_C_A   | 377A>S | Substitution | Nonsynonymous coding | 15% |
| MM12T | LEFTY1  | left-right determination factor 1                                   | CCDS1548.1      | chr1_226075193-226075193_C_T  | 215A>T | Substitution | Nonsynonymous coding | 12% |
| MM12T | LENG8   | leukocyte receptor cluster (LRC) member 8                           | CCDS12894.1     | chr19_54966652-54966652_G_A   | 311D>N | Substitution | Nonsynonymous coding | 16% |
| MM12T | LENG8   | leukocyte receptor cluster (LRC) member 8                           | CCDS12894.1     | chr19_54967374-54967374_C_A   | 418D>E | Substitution | Nonsynonymous coding | 29% |
| MM12T | LEPREL2 | leprecan-like 2                                                     | ENST00000290510 | chr12_6939863-6939863_C_A     | 304P>H | Substitution | Nonsynonymous coding | 30% |
| MM12T | LETM1   | leucine zipper-EF-hand containing transmembrane protein 1           | CCDS3355.1      | chr4_1825505-1825505_G_A      | ISV-3> | Substitution | Splice site acceptor | 16% |
| MM12T | LGALS13 | lectin, galactoside-binding, soluble, 13                            | CCDS33024.1     | chr19_40097882-40097882_G_A   | 108R>H | Substitution | Nonsynonymous coding | 16% |
| MM12T | LGI3    | leucine-rich repeat LGI family, member 3                            | CCDS6025.1      | chr8_22005810-22005810_G_A    | 504R>W | Substitution | Nonsynonymous coding | 10% |
| MM12T | LGI3    | leucine-rich repeat LGI family, member 3                            | CCDS6025.1      | chr8_22005884-22005884_C_T    | 479R>H | Substitution | Nonsynonymous coding | 33% |
| MM12T | LGSN    | lengsin, lens protein with glutamine synthetase domain              | CCDS4964.1      | chr6_63990492-63990492_C_T    | 322D>N | Substitution | Nonsynonymous coding | 50% |
| MM12T | LHFP    | lipoma HMGIC fusion partner                                         | CCDS9369.1      | chr13_40175145-40175145_C_T   | 70R>H  | Substitution | Nonsynonymous coding | 31% |
| MM12T | LHFPL4  | lipoma HMGIC fusion partner-like 4                                  | CCDS33691.1     | chr3_9594291-9594291_G_T      | 25L>M  | Substitution | Nonsynonymous coding | 30% |
| MM12T | LHFPL5  | lipoma HMGIC fusion partner-like 5                                  | CCDS4812.1      | chr6_35782470-35782470_G_A    | 187G>D | Substitution | Nonsynonymous coding | 21% |
| MM12T | LHPP    | phosphorylsine phosphohistidine inorganic pyrophosphate phosphatase | CCDS7640.1      | chr10_126186615-126186615_G_A | 181G>D | Substitution | Nonsynonymous coding | 11% |
| MM12T | LHX1    | LIM homeobox 1                                                      | CCDS11316.1     | chr17_35297615-35297615_G_A   | 67A>T  | Substitution | Nonsynonymous coding | 11% |
| MM12T | LHX3    | LIM homeobox 3                                                      | CCDS6995.1      | chr9_139091668-139091668_G_A  | 109R>C | Substitution | Nonsynonymous coding | 18% |
| MM12T | LHX4    | LIM homeobox 4                                                      | CCDS1338.1      | chr1_180241031-180241031_G_A  | 223R>H | Substitution | Nonsynonymous coding | 12% |
| MM12T | LIAS    | lipic acid synthetase                                               | CCDS3453.1      | chr4_39466943-39466943_G_A    | 197V>I | Substitution | Nonsynonymous coding | 13% |

|       |        |                                                                                 |                 |                              |        |              |                      |     |
|-------|--------|---------------------------------------------------------------------------------|-----------------|------------------------------|--------|--------------|----------------------|-----|
| MM12T | LIAS   | lipoic acid synthetase                                                          | CCDS3453.1      | chr4_39466962-39466962_G_A   | 203R>K | Substitution | Nonsynonymous coding | 19% |
| MM12T | LIG3   | ligase III, DNA, ATP-dependent                                                  | CCDS11284.2     | chr17_33326830-33326830_G_T  | 762K>N | Substitution | Nonsynonymous coding | 22% |
| MM12T | LILRB3 | leukocyte immunoglobulin-like receptor, subfamily B (with TM and ITIM domains), | ENST00000407860 | chr19_54723778-54723778_C_A  | 440E>D | Substitution | Nonsynonymous coding | 46% |
| MM12T | LIM2   | lens intrinsic membrane protein 2, 19kDa                                        | CCDS12831.1     | chr19_51885738-51885738_C_T  | 129A>T | Substitution | Nonsynonymous coding | 12% |
| MM12T | LIMA1  | LIM domain and actin binding 1                                                  | CCDS44877.1     | chr12_50570879-50570879_G_A  | 751R>W | Substitution | Nonsynonymous coding | 33% |
| MM12T | LIMA1  | LIM domain and actin binding 1                                                  | CCDS44877.1     | chr12_50642415-50642415_C_T  | ISV+1> | Substitution | Splice site donor    | 31% |
| MM12T | LIMCH1 | LIM and calponin homology domains 1                                             | CCDS33977.1     | chr4_41648209-41648209_A_    | NA     | Deletion     | Frameshift           | 19% |
| MM12T | LIMCH1 | LIM and calponin homology domains 1                                             | ENST00000313875 | chr4_41635752-41635752_T_A   | 673F>I | Substitution | Nonsynonymous coding | 14% |
| MM12T | LIMD2  | LIM domain containing 2                                                         | CCDS11641.1     | chr17_61776229-61776229_G_A  | 52R>W  | Substitution | Nonsynonymous coding | 14% |
| MM12T | LIMK2  | LIM domain kinase 2                                                             | CCDS33637.1     | chr22_31658728-31658728_C_A  | 248L>M | Substitution | Nonsynonymous coding | 35% |
| MM12T | LIN37  | lin-37 homolog (C. elegans)                                                     | NM_019104       | chr19_36245172-36245172_C_A  | 204S>Y | Substitution | Nonsynonymous coding | 26% |
| MM12T | LINGO2 | leucine rich repeat and Ig domain containing 2                                  | CCDS6524.1      | chr9_27949443-27949443__T    | NA     | Insertion    | Frameshift           | 25% |
| MM12T | LIPG   | lipase, endothelial                                                             | CCDS11938.1     | chr18_47107944-47107944_G_T  | 318S>I | Substitution | Nonsynonymous coding | 30% |
| MM12T | LIPG   | lipase, endothelial                                                             | CCDS11938.1     | chr18_47110141-47110141_G_A  | 458R>Q | Substitution | Nonsynonymous coding | 17% |
| MM12T | LIPH   | lipase, member H                                                                | CCDS3272.1      | chr3_185229354-185229354_C_A | 409R>M | Substitution | Nonsynonymous coding | 23% |
| MM12T | LLGL1  | lethal giant larvae homolog 1 (Drosophila)                                      | CCDS32586.1     | chr17_18140899-18140899_G_T  | 572E>D | Substitution | Nonsynonymous coding | 12% |
| MM12T | LLGL1  | lethal giant larvae homolog 1 (Drosophila)                                      | CCDS32586.1     | chr17_18141417-18141417_G_T  | 647E>D | Substitution | Nonsynonymous coding | 15% |
| MM12T | LLGL1  | lethal giant larvae homolog 1 (Drosophila)                                      | CCDS32586.1     | chr17_18141840-18141840_G_A  | 708R>H | Substitution | Nonsynonymous coding | 19% |
| MM12T | LLGL1  | lethal giant larvae homolog 1 (Drosophila)                                      | CCDS32586.1     | chr17_18144167-18144167_G_A  | 828A>T | Substitution | Nonsynonymous coding | 25% |
| MM12T | LMAN2  | lectin, mannose-binding 2                                                       | CCDS4417.1      | chr5_176765509-176765509_G_A | 138T>I | Substitution | Nonsynonymous coding | 26% |
| MM12T | LMAN2L | lectin, mannose-binding 2-like                                                  | CCDS46365.1     | chr2_97377437-97377437_C_T   | 258R>H | Substitution | Nonsynonymous coding | 35% |
| MM12T | LMCD1  | LIM and cysteine-rich domains 1                                                 | CCDS33688.1     | chr3_8609231-8609231_G_A     | 349V>I | Substitution | Nonsynonymous coding | 35% |
| MM12T | LMF2   | lipase maturation factor 2                                                      | CCDS14093.1     | chr22_50941873-50941873_C_T  | 666A>T | Substitution | Nonsynonymous coding | 40% |
| MM12T | LMLN   | leishmanolysin-like (metallopeptidase M8 family)                                | CCDS46988.1     | chr3_197707272-197707272_G_A | 209A>T | Substitution | Nonsynonymous coding | 18% |
| MM12T | LMLN   | leishmanolysin-like (metallopeptidase M8 family)                                | CCDS46988.1     | chr3_197707197-197707197_C_T | 184Q>X | Substitution | Nonsense             | 20% |
| MM12T | LMNB1  | lamin B1                                                                        | CCDS4140.1      | chr5_126156747-126156747_G_A | 436A>T | Substitution | Nonsynonymous coding | 20% |
| MM12T | LMNB2  | lamin B2                                                                        | CCDS12090.1     | chr19_2434878-2434878_C_T    | 277D>N | Substitution | Nonsynonymous coding | 26% |
| MM12T | LMO7   | LIM domain 7                                                                    | CCDS9454.1      | chr13_76415878-76415878_C_T  | 982R>X | Substitution | Nonsense             | 17% |
| MM12T | LMTK2  | lemur tyrosine kinase 2                                                         | CCDS5654.1      | chr7_97800888-97800888_G_T   | 231E>D | Substitution | Nonsynonymous coding | 30% |
| MM12T | LMTK3  | lemur tyrosine kinase 3                                                         | CCDS46136.1     | chr19_49001946-49001946_C_T  | 823G>S | Substitution | Nonsynonymous coding | 41% |
| MM12T | LNPEP  | leucyl/cystinyl aminopeptidase                                                  | CCDS4087.1      | chr5_96315077-96315077_C_A   | 85S>R  | Substitution | Nonsynonymous coding | 30% |
| MM12T | LONP2  | lon peptidase 2, peroxisomal                                                    | CCDS10734.1     | chr16_48303983-48303983_G_A  | 347E>K | Substitution | Nonsynonymous coding | 12% |

|       |        |                                                                      |             |                               |         |              |                      |     |
|-------|--------|----------------------------------------------------------------------|-------------|-------------------------------|---------|--------------|----------------------|-----|
| MM12T | LONRF1 | LON peptidase N-terminal domain and ring finger 1                    | CCDS5987.2  | chr8_12586477-12586477_C_A    | 648R>M  | Substitution | Nonsynonymous coding | 20% |
| MM12T | LOXL1  | lysyl oxidase-like 1                                                 | CCDS10253.1 | chr15_74238819-74238819_C_T   | 425R>C  | Substitution | Nonsynonymous coding | 32% |
| MM12T | LOXL1  | lysyl oxidase-like 1                                                 | CCDS10253.1 | chr15_74241809-74241809_A_G   | 538N>D  | Substitution | Nonsynonymous coding | 26% |
| MM12T | LOXL2  | lysyl oxidase-like 2                                                 | CCDS34864.1 | chr8_23225726-23225726_G_A    | 47P>S   | Substitution | Nonsynonymous coding | 31% |
| MM12T | LOXL4  | lysyl oxidase-like 4                                                 | CCDS7473.1  | chr10_100022545-100022545_C_T | 78A>T   | Substitution | Nonsynonymous coding | 27% |
| MM12T | LPAR4  | lysophosphatidic acid receptor 4                                     | CCDS14441.1 | chrX_78010773-78010773_G_A    | 136R>H  | Substitution | Nonsynonymous coding | 33% |
| MM12T | LPCAT1 | lysophosphatidylcholine acyltransferase 1                            | CCDS3864.1  | chr5_1463833-1463833_A_G      | 513F>S  | Substitution | Nonsynonymous coding | 31% |
| MM12T | LPCAT3 | lysophosphatidylcholine acyltransferase 3                            | CCDS8572.1  | chr12_7087545-7087545_G_T     | 333T>N  | Substitution | Nonsynonymous coding | 32% |
| MM12T | LPCAT4 | lysophosphatidylcholine acyltransferase 4                            | CCDS32191.1 | chr15_34654520-34654520_G_A   | 296A>V  | Substitution | Nonsynonymous coding | 37% |
| MM12T | LPHN1  | latrophilin 1                                                        | CCDS32928.1 | chr19_14263401-14263401_C_T   | 1155D>N | Substitution | Nonsynonymous coding | 35% |
| MM12T | LPHN2  | latrophilin 2                                                        | CCDS689.1   | chr1_82456679-82456679_G_A    | 1354M>I | Substitution | Nonsynonymous coding | 34% |
| MM12T | LPHN2  | latrophilin 2                                                        | CCDS689.1   | chr1_82372776-82372776_C_T    | 50R>X   | Substitution | Nonsense             | 40% |
| MM12T | LPHN3  | latrophilin 3                                                        | NM_015236   | chr4_62778475-62778475_G_T    | 636Q>H  | Substitution | Nonsynonymous coding | 19% |
| MM12T | LPO    | lactoperoxidase                                                      | CCDS32689.1 | chr17_56343598-56343598_G_A   | 535R>H  | Substitution | Nonsynonymous coding | 13% |
| MM12T | LRBA   | LPS-responsive vesicle trafficking, beach and anchor containing      | CCDS3773.1  | chr4_151773632-151773632_T_C  | 1077E>G | Substitution | Nonsynonymous coding | 14% |
| MM12T | LRCH1  | leucine-rich repeats and calponin homology (CH) domain containing 1  | CCDS31972.1 | chr13_47315910-47315910_G_A   | 705G>D  | Substitution | Nonsynonymous coding | 26% |
| MM12T | LRCH2  | leucine-rich repeats and calponin homology (CH) domain containing 2  | CCDS48155.1 | chrX_114384396-114384396_A_C  | 563Y>X  | Substitution | Nonsense             | 36% |
| MM12T | LRCH3  | leucine-rich repeats and calponin homology (CH) domain containing 3  | CCDS3330.1  | chr3_197557664-197557664_G_A  | 304R>H  | Substitution | Nonsynonymous coding | 16% |
| MM12T | LRCH4  | leucine-rich repeats and calponin homology (CH) domain containing 4  | CCDS34706.1 | chr7_100173537-100173537_C_T  | 578R>Q  | Substitution | Nonsynonymous coding | 14% |
| MM12T | LRFN1  | leucine rich repeat and fibronectin type III domain containing 1     | CCDS46071.1 | chr19_39799024-39799024_G_A   | 522A>V  | Substitution | Nonsynonymous coding | 31% |
| MM12T | LRFN1  | leucine rich repeat and fibronectin type III domain containing 1     | CCDS46071.1 | chr19_39805838-39805838_G_C   | 47L>V   | Substitution | Nonsynonymous coding | 27% |
| MM12T | LRFN2  | leucine rich repeat and fibronectin type III domain containing 2     | CCDS34443.1 | chr6_40399677-40399677_G      | NA      | Insertion    | Frameshift           | 23% |
| MM12T | LRGUK  | leucine-rich repeats and guanylate kinase domain containing          | CCDS5830.1  | chr7_133861753-133861753_G_A  | 349V>I  | Substitution | Nonsynonymous coding | 13% |
| MM12T | LRGUK  | leucine-rich repeats and guanylate kinase domain containing          | CCDS5830.1  | chr7_133881831-133881831_G_A  | 507A>T  | Substitution | Nonsynonymous coding | 14% |
| MM12T | LRGUK  | leucine-rich repeats and guanylate kinase domain containing          | CCDS5830.1  | chr7_133943059-133943059_C_T  | 750P>L  | Substitution | Nonsynonymous coding | 17% |
| MM12T | LRIG1  | leucine-rich repeats and immunoglobulin-like domains 1               | CCDS33783.1 | chr3_66550660-66550660_C_T    | 58G>R   | Substitution | Nonsynonymous coding | 41% |
| MM12T | LRIG3  | leucine-rich repeats and immunoglobulin-like domains 3               | CCDS8960.1  | chr12_59271617-59271617_G_A   | 701R>W  | Substitution | Nonsynonymous coding | 13% |
| MM12T | LRIT1  | leucine-rich repeat, immunoglobulin-like and transmembrane domains 1 | CCDS7373.1  | chr10_85997258-85997258_G_T   | 103L>M  | Substitution | Nonsynonymous coding | 32% |
| MM12T | LRIT2  | leucine-rich repeat, immunoglobulin-like and transmembrane domains 2 | CCDS31234.1 | chr10_85981836-85981836_C_T   | 498R>H  | Substitution | Nonsynonymous coding | 31% |
| MM12T | LRIT3  | leucine-rich repeat, immunoglobulin-like and transmembrane domains 3 | CCDS3688.2  | chr4_110773069-110773069_T_C  | 131W>R  | Substitution | Nonsynonymous coding | 32% |
| MM12T | LRP1   | low density lipoprotein receptor-related protein 1                   | CCDS8932.1  | chr12_57572284-57572284_G_A   | 1502A>T | Substitution | Nonsynonymous coding | 32% |
| MM12T | LRP1   | low density lipoprotein receptor-related protein 1                   | CCDS8932.1  | chr12_57589879-57589879_G_A   | 2904C>Y | Substitution | Nonsynonymous coding | 35% |

|       |         |                                                     |                 |                              |         |              |                      |     |
|-------|---------|-----------------------------------------------------|-----------------|------------------------------|---------|--------------|----------------------|-----|
| MM12T | LRP1    | low density lipoprotein receptor-related protein 1  | CCDS8932.1      | chr12_57604623-57604623_C_T  | 4293R>X | Substitution | Nonsense             | 28% |
| MM12T | LRP10   | low density lipoprotein receptor-related protein 10 | CCDS9578.1      | chr14_23342579-23342579_G_A  | 47V>I   | Substitution | Nonsynonymous coding | 11% |
| MM12T | LRP1B   | low density lipoprotein receptor-related protein 1B | CCDS2182.1      | chr2_141459401-141459401_C_T | 2106G>R | Substitution | Nonsynonymous coding | 25% |
| MM12T | LRP1B   | low density lipoprotein receptor-related protein 1B | CCDS2182.1      | chr2_141709492-141709492_G_A | 969P>S  | Substitution | Nonsynonymous coding | 44% |
| MM12T | LRP1B   | low density lipoprotein receptor-related protein 1B | CCDS2182.1      | chr2_141004651-141004651_T_G | ISV+4>  | Substitution | Splice site donor    | 15% |
| MM12T | LRP2    | low density lipoprotein receptor-related protein 2  | CCDS2232.1      | chr2_170063445-170063445_C_T | 2262R>H | Substitution | Nonsynonymous coding | 37% |
| MM12T | LRP2    | low density lipoprotein receptor-related protein 2  | CCDS2232.1      | chr2_170058336-170058336_G_A | 2752R>X | Substitution | Nonsense             | 15% |
| MM12T | LRP4    | low density lipoprotein receptor-related protein 4  | CCDS31478.1     | chr11_46889596-46889596_G_A  | 1674T>I | Substitution | Nonsynonymous coding | 24% |
| MM12T | LRP4    | low density lipoprotein receptor-related protein 4  | CCDS31478.1     | chr11_46916247-46916247_C_T  | 478R>H  | Substitution | Nonsynonymous coding | 13% |
| MM12T | LRP5    | low density lipoprotein receptor-related protein 5  | CCDS8181.1      | chr11_68115615-68115615_G_A  | 131R>H  | Substitution | Nonsynonymous coding | 36% |
| MM12T | LRP5    | low density lipoprotein receptor-related protein 5  | CCDS8181.1      | chr11_68170979-68170979_G_A  | 538R>Q  | Substitution | Nonsynonymous coding | 32% |
| MM12T | LRP5    | low density lipoprotein receptor-related protein 5  | CCDS8181.1      | chr11_68183796-68183796_C_T  | 943P>L  | Substitution | Nonsynonymous coding | 30% |
| MM12T | LRP5    | low density lipoprotein receptor-related protein 5  | CCDS8181.1      | chr11_68191155-68191155_G_A  | 1076A>T | Substitution | Nonsynonymous coding | 40% |
| MM12T | LRP5    | low density lipoprotein receptor-related protein 5  | CCDS8181.1      | chr11_68201270-68201270_G_A  | 1322D>N | Substitution | Nonsynonymous coding | 16% |
| MM12T | LRP5    | low density lipoprotein receptor-related protein 5  | CCDS8181.1      | chr11_68204387-68204387_C_T  | 1344A>V | Substitution | Nonsynonymous coding | 13% |
| MM12T | LRP6    | low density lipoprotein receptor-related protein 6  | CCDS8647.1      | chr12_12339985-12339985_C_A  | 239W>L  | Substitution | Nonsynonymous coding | 24% |
| MM12T | LRPPRC  | leucine-rich pentatricopeptide repeat containing    | CCDS33189.1     | chr2_44132917-44132917_G_A   | 1093A>V | Substitution | Nonsynonymous coding | 39% |
| MM12T | LRPPRC  | leucine-rich pentatricopeptide repeat containing    | CCDS33189.1     | chr2_44190740-44190740_C_T   | 492R>Q  | Substitution | Nonsynonymous coding | 26% |
| MM12T | LRPPRC  | leucine-rich pentatricopeptide repeat containing    | CCDS33189.1     | chr2_44176750-44176750_C_A   | 576G>X  | Substitution | Nonsense             | 27% |
| MM12T | LRR1    | leucine rich repeat protein 1                       | CCDS9686.1      | chr14_50074262-50074262_A_   | NA      | Deletion     | Frameshift           | 29% |
| MM12T | LRRC16A | leucine rich repeat containing 16A                  | ENST00000332168 | chr6_25452454-25452454_T_    | NA      | Deletion     | Frameshift           | 45% |
| MM12T | LRRC16A | leucine rich repeat containing 16A                  | NM_017640       | chr6_25538159-25538159_A_T   | 715E>V  | Substitution | Nonsynonymous coding | 11% |
| MM12T | LRRC20  | leucine rich repeat containing 20                   | CCDS7302.1      | chr10_72061130-72061130_C_T  | 179A>T  | Substitution | Nonsynonymous coding | 34% |
| MM12T | LRRC34  | leucine rich repeat containing 34                   | CCDS3208.1      | chr3_169514669-169514669_C_T | 213V>I  | Substitution | Nonsynonymous coding | 31% |
| MM12T | LRRC36  | leucine rich repeat containing 36                   | CCDS32467.1     | chr16_67401279-67401279_G_A  | 372A>T  | Substitution | Nonsynonymous coding | 27% |
| MM12T | LRRC39  | leucine rich repeat containing 39                   | CCDS766.1       | chr1_100618060-100618060_T_C | 278N>S  | Substitution | Nonsynonymous coding | 16% |
| MM12T | LRRC41  | leucine rich repeat containing 41                   | CCDS533.1       | chr1_46763306-46763306_C_A   | ISV-1>  | Substitution | Splice site acceptor | 40% |
| MM12T | LRRC42  | leucine rich repeat containing 42                   | CCDS585.1       | chr1_54426078-54426078_C_T   | 219R>W  | Substitution | Nonsynonymous coding | 27% |
| MM12T | LRRC49  | leucine rich repeat containing 49                   | CCDS32282.1     | chr15_71272452-71272452_C_T  | 312R>C  | Substitution | Nonsynonymous coding | 11% |
| MM12T | LRRC4B  | leucine rich repeat containing 4B                   | CCDS42595.1     | chr19_51021034-51021034_C_T  | 646G>R  | Substitution | Nonsynonymous coding | 35% |
| MM12T | LRRC4C  | leucine rich repeat containing 4C                   | CCDS31464.1     | chr11_40137472-40137472_G_A  | 124A>V  | Substitution | Nonsynonymous coding | 50% |
| MM12T | LRRC56  | leucine rich repeat containing 56                   | CCDS7700.1      | chr11_549907-549907_T_C      | 111L>S  | Substitution | Nonsynonymous coding | 33% |

|       |        |                                                                      |                 |                               |         |              |                      |     |
|-------|--------|----------------------------------------------------------------------|-----------------|-------------------------------|---------|--------------|----------------------|-----|
| MM12T | LRRC66 | leucine rich repeat containing 66                                    | CCDS43229.1     | chr4_52861860-52861860_C_T    | 443R>H  | Substitution | Nonsynonymous coding | 36% |
| MM12T | LRRC66 | leucine rich repeat containing 66                                    | CCDS43229.1     | chr4_52861995-52861995_C_A    | 398R>M  | Substitution | Nonsynonymous coding | 15% |
| MM12T | LRRC8A | leucine rich repeat containing 8 family, member A                    | CCDS35155.1     | chr9_131670168-131670168_C_T  | 242A>V  | Substitution | Nonsynonymous coding | 34% |
| MM12T | LRRC8E | leucine rich repeat containing 8 family, member E                    | CCDS12189.1     | chr19_7964763-7964763_C_      | NA      | Deletion     | Frameshift           | 35% |
| MM12T | LRRC8E | leucine rich repeat containing 8 family, member E                    | CCDS12189.1     | chr19_7965584-7965584_C_T     | 726T>M  | Substitution | Nonsynonymous coding | 16% |
| MM12T | LRRD1  | leucine-rich repeats and death domain containing 1                   | NM_001161528    | chr7_91794442-91794442_C_A    | 25Q>H   | Substitution | Nonsynonymous coding | 28% |
| MM12T | LRRK2  | leucine-rich repeat kinase 2                                         | CCDS31774.1     | chr12_40677776-40677776_A_G   | 781K>E  | Substitution | Nonsynonymous coding | 36% |
| MM12T | LRRN1  | leucine rich repeat neuronal 1                                       | CCDS33685.1     | chr3_3887377-3887377_C_T      | 351A>V  | Substitution | Nonsynonymous coding | 32% |
| MM12T | LRRN4  | leucine rich repeat neuronal 4                                       | CCDS13097.1     | chr20_6022374-6022374_G_C     | 506T>R  | Substitution | Nonsynonymous coding | 35% |
| MM12T | LRRTM3 | leucine rich repeat transmembrane neuronal 3                         | CCDS7270.1      | chr10_68687143-68687143_C_T   | 157R>W  | Substitution | Nonsynonymous coding | 33% |
| MM12T | LRTOMT | leucine rich transmembrane and O-methyltransferase domain containing | CCDS8208.1      | chr11_71805994-71805994_G_A   | 97V>I   | Substitution | Nonsynonymous coding | 18% |
| MM12T | LSM14B | LSM14B, SCD6 homolog B (S. cerevisiae)                               | CCDS46626.1     | chr20_60708387-60708387_C_T   | 343T>I  | Substitution | Nonsynonymous coding | 31% |
| MM12T | LTBP1  | latent transforming growth factor beta binding protein 1             | CCDS33177.1     | chr2_33588493-33588493_G_A    | 1437C>Y | Substitution | Nonsynonymous coding | 31% |
| MM12T | LTBP1  | latent transforming growth factor beta binding protein 1             | CCDS33177.1     | chr2_33623602-33623602_A_T    | 1720D>V | Substitution | Nonsynonymous coding | 26% |
| MM12T | LTBP2  | latent transforming growth factor beta binding protein 2             | CCDS9831.1      | chr14_75078170-75078170_G_A   | 160R>X  | Substitution | Nonsense             | 29% |
| MM12T | LTBP3  | latent transforming growth factor beta binding protein 3             | CCDS44647.1     | chr11_65310961-65310961_C_A   | 805G>X  | Substitution | Nonsense             | 27% |
| MM12T | LTN1   | listerin E3 ubiquitin protein ligase 1                               | CCDS33527.1     | chr21_30331783-30331783_G_A   | 864P>S  | Substitution | Nonsynonymous coding | 16% |
| MM12T | LUC7L  | LUC7-like (S. cerevisiae)                                            | CCDS32348.1     | chr16_256026-256026_G_A       | 163R>C  | Substitution | Nonsynonymous coding | 23% |
| MM12T | LUM    | lumican                                                              | CCDS9038.1      | chr12_91497971-91497971_G_A   | 330R>C  | Substitution | Nonsynonymous coding | 29% |
| MM12T | LUZP2  | leucine zipper protein 2                                             | CCDS31446.1     | chr11_24927544-24927544_G_T   | 135S>I  | Substitution | Nonsynonymous coding | 19% |
| MM12T | LY6G5C | lymphocyte antigen 6 complex, locus G5C                              | ENST00000375863 | chr6_31651020-31651020_C_T    | 51R>H   | Substitution | Nonsynonymous coding | 18% |
| MM12T | LYAR   | Ly1 antibody reactive                                                | CCDS3374.1      | chr4_4283595-4283595_C_T      | 51C>Y   | Substitution | Nonsynonymous coding | 31% |
| MM12T | LYG1   | lysozyme G-like 1                                                    | CCDS2043.1      | chr2_99912106-99912106_G_T    | 10L>I   | Substitution | Nonsynonymous coding | 20% |
| MM12T | LYN    | v-yes-1 Yamaguchi sarcoma viral related oncogene homolog             | CCDS6162.1      | chr8_56863088-56863088_G_A    | 119A>T  | Substitution | Nonsynonymous coding | 29% |
| MM12T | LYPD6  | LY6/PLAUR domain containing 6                                        | CCDS2188.1      | chr2_150294272-150294272_C_T  | 17A>V   | Substitution | Nonsynonymous coding | 33% |
| MM12T | LYSMD4 | LysM, putative peptidoglycan-binding, domain containing 4            | CCDS10381.1     | chr15_100269338-100269338_G_A | 295A>V  | Substitution | Nonsynonymous coding | 19% |
| MM12T | LYZL4  | lysozyme-like 4                                                      | CCDS2697.1      | chr3_42448362-42448362_T_C    | 90N>D   | Substitution | Nonsynonymous coding | 35% |
| MM12T | LZTR1  | leucine-zipper-like transcription regulator 1                        | CCDS33606.1     | chr22_21345925-21345925_G_A   | 267R>H  | Substitution | Nonsynonymous coding | 32% |
| MM12T | LZTR1  | leucine-zipper-like transcription regulator 1                        | CCDS33606.1     | chr22_21347108-21347108_C_T   | 392A>V  | Substitution | Nonsynonymous coding | 34% |
| MM12T | LZTS1  | leucine zipper, putative tumor suppressor 1                          | CCDS6015.1      | chr8_20107475-20107475_C_A    | 517G>C  | Substitution | Nonsynonymous coding | 35% |
| MM12T | LZTS2  | leucine zipper, putative tumor suppressor 2                          | CCDS7507.1      | chr10_102765279-102765279_C_T | 378A>V  | Substitution | Nonsynonymous coding | 10% |
| MM12T | MAATS1 | MYCBP-associated, testis expressed 1                                 | CCDS2994.1      | chr3_119426264-119426264_G_T  | 72R>M   | Substitution | Nonsynonymous coding | 23% |



|       |         |                                                                      |                 |                              |         |              |                      |     |
|-------|---------|----------------------------------------------------------------------|-----------------|------------------------------|---------|--------------|----------------------|-----|
| MM12T | MAB21L2 | mab-21-like 2 (C. elegans)                                           | CCDS3774.1      | chr4_151504473-151504473_G_A | 98A>T   | Substitution | Nonsynonymous coding | 32% |
| MM12T | MAB21L2 | mab-21-like 2 (C. elegans)                                           | CCDS3774.1      | chr4_151504731-151504731_G_A | 184A>T  | Substitution | Nonsynonymous coding | 11% |
| MM12T | MACC1   | metastasis associated in colon cancer 1                              | CCDS5369.1      | chr7_20199686-20199686_G_A   | 100P>S  | Substitution | Nonsynonymous coding | 21% |
| MM12T | MACF1   | microtubule-actin crosslinking factor 1                              | CCDS435.1       | chr1_39550053-39550053_C_T   | 55R>W   | Substitution | Nonsynonymous coding | 30% |
| MM12T | MACF1   | microtubule-actin crosslinking factor 1                              | CCDS436.1       | chr1_39826575-39826575_C_A   | 2559L>M | Substitution | Nonsynonymous coding | 41% |
| MM12T | MACF1   | microtubule-actin crosslinking factor 1                              | CCDS436.1       | chr1_39906729-39906729_C_A   | 4611L>I | Substitution | Nonsynonymous coding | 34% |
| MM12T | MADCAM1 | mucosal vascular addressin cell adhesion molecule 1                  | CCDS12028.1     | chr19_498681-498681_C_T      | 175P>S  | Substitution | Nonsynonymous coding | 38% |
| MM12T | MADD    | MAP-kinase activating death domain                                   | CCDS7930.1      | chr11_47331083-47331083_C_T  | 1360R>W | Substitution | Nonsynonymous coding | 19% |
| MM12T | MAGEB3  | melanoma antigen family B, 3                                         | CCDS14220.1     | chrX_30254817-30254817_A_G   | 259E>G  | Substitution | Nonsynonymous coding | 33% |
| MM12T | MAGEB5  | melanoma antigen family B, 5                                         | ENST00000379029 | chrX_26235540-26235540_A_C   | 41N>T   | Substitution | Nonsynonymous coding | 29% |
| MM12T | MAGEB5  | melanoma antigen family B, 5                                         | ENST00000379029 | chrX_26236215-26236215_C_T   | 266A>V  | Substitution | Nonsynonymous coding | 25% |
| MM12T | MAGEC1  | melanoma antigen family C, 1                                         | CCDS35417.1     | chrX_140995910-140995910_C_T | 907T>I  | Substitution | Nonsynonymous coding | 27% |
| MM12T | MAGEC2  | melanoma antigen family C, 2                                         | CCDS14678.1     | chrX_141291287-141291287_T_A | 163T>S  | Substitution | Nonsynonymous coding | 13% |
| MM12T | MAGEC2  | melanoma antigen family C, 2                                         | CCDS14678.1     | chrX_141291292-141291292_G_T | 161P>H  | Substitution | Nonsynonymous coding | 28% |
| MM12T | MAGED1  | melanoma antigen family D, 1                                         | CCDS35279.1     | chrX_51637772-51637772_C_A   | 32A>D   | Substitution | Nonsynonymous coding | 30% |
| MM12T | MAGED1  | melanoma antigen family D, 1                                         | CCDS35279.1     | chrX_51639710-51639710_G_A   | 376R>H  | Substitution | Nonsynonymous coding | 34% |
| MM12T | MAGED1  | melanoma antigen family D, 1                                         | CCDS35279.1     | chrX_51639640-51639640_C_T   | 353Q>X  | Substitution | Nonsense             | 34% |
| MM12T | MAGED2  | melanoma antigen family D, 2                                         | CCDS14362.1     | chrX_54841970-54841970_C_T   | 559A>V  | Substitution | Nonsynonymous coding | 11% |
| MM12T | MAGEE2  | melanoma antigen family E, 2                                         | CCDS14431.1     | chrX_75004823-75004823_C_T   | 22G>S   | Substitution | Nonsynonymous coding | 15% |
| MM12T | MAGEF1  | melanoma antigen family F, 1                                         | CCDS3269.1      | chr3_184429241-184429241_C_A | 123E>D  | Substitution | Nonsynonymous coding | 34% |
| MM12T | MAGI2   | membrane associated guanylate kinase, WW and PDZ domain containing 2 | CCDS5594.1      | chr7_77755049-77755049_C_T   | 1177A>T | Substitution | Nonsynonymous coding | 26% |
| MM12T | MAGI3   | membrane associated guanylate kinase, WW and PDZ domain containing 3 | CCDS44196.1     | chr1_114137153-114137153_C_T | 330A>V  | Substitution | Nonsynonymous coding | 31% |
| MM12T | MAGT1   | magnesium transporter 1                                              | CCDS14436.2     | chrX_77112357-77112357_C_A   | 214R>I  | Substitution | Nonsynonymous coding | 12% |
| MM12T | MAGT1   | magnesium transporter 1                                              | CCDS14436.2     | chrX_77126340-77126340_C_T   | 151V>M  | Substitution | Nonsynonymous coding | 28% |
| MM12T | MAK16   | MAK16 homolog (S. cerevisiae)                                        | CCDS6089.1      | chr8_33346300-33346300_G_A   | 75R>Q   | Substitution | Nonsynonymous coding | 18% |
| MM12T | MALT1   | mucosa associated lymphoid tissue lymphoma translocation gene 1      | CCDS11967.1     | chr18_56376682-56376682_G_T  | 241G>V  | Substitution | Nonsynonymous coding | 14% |
| MM12T | MAMDC2  | MAM domain containing 2                                              | CCDS6631.1      | chr9_72783701-72783701_C_A   | 496C>X  | Substitution | Nonsense             | 13% |
| MM12T | MAMDC4  | MAM domain containing 4                                              | CCDS7010.1      | chr9_139747607-139747607_G_A | 34A>T   | Substitution | Nonsynonymous coding | 32% |
| MM12T | MAN2A1  | mannosidase, alpha, class 2A, member 1                               | CCDS34209.1     | chr5_109026234-109026234_G_A | 39R>H   | Substitution | Nonsynonymous coding | 36% |
| MM12T | MAN2A2  | mannosidase, alpha, class 2A, member 2                               | CCDS32332.1     | chr15_91455412-91455412_C_T  | 750A>V  | Substitution | Nonsynonymous coding | 26% |
| MM12T | MAN2B1  | mannosidase, alpha, class 2B, member 1                               | CCDS32919.1     | chr19_12759021-12759021_C_T  | 878A>T  | Substitution | Nonsynonymous coding | 15% |
| MM12T | MAN2B2  | mannosidase, alpha, class 2B, member 2                               | CCDS33951.1     | chr4_6612671-6612671_C_T     | 775S>L  | Substitution | Nonsynonymous coding | 27% |

|       |         |                                                                                     |                |                              |         |              |                      |     |
|-------|---------|-------------------------------------------------------------------------------------|----------------|------------------------------|---------|--------------|----------------------|-----|
| MM12T | MAN2B2  | mannosidase, alpha, class 2B, member 2                                              | CCDS33951.1    | chr4_6612939-6612939_G_A     | 833A>T  | Substitution | Nonsynonymous coding | 36% |
| MM12T | MAN2C1  | mannosidase, alpha, class 2C, member 1                                              | CCDS32298.1    | chr15_75656507-75656507_C_T  | 208R>H  | Substitution | Nonsynonymous coding | 35% |
| MM12T | MANBA   | mannosidase, beta A, lysosomal                                                      | CCDS3658.1     | chr4_103595095-103595095_C_T | 365D>N  | Substitution | Nonsynonymous coding | 12% |
| MM12T | MAP1A   | microtubule-associated protein 1A                                                   | CCDS42031.1    | chr15_43814278-43814278_C_A  | 203L>I  | Substitution | Nonsynonymous coding | 16% |
| MM12T | MAP1A   | microtubule-associated protein 1A                                                   | CCDS42031.1    | chr15_43821109-43821109_C_T  | 2480R>C | Substitution | Nonsynonymous coding | 33% |
| MM12T | MAP1B   | microtubule-associated protein 1B                                                   | CCDS4012.1     | chr5_71495196-71495196_G_A   | 2005S>N | Substitution | Nonsynonymous coding | 36% |
| MM12T | MAP1S   | microtubule-associated protein 1S                                                   | CCDS32954.1    | chr19_17837043-17837043_C_T  | 284R>C  | Substitution | Nonsynonymous coding | 36% |
| MM12T | MAP2    | microtubule-associated protein 2                                                    | CCDS2384.1     | chr2_210561667-210561667_A   | NA      | Insertion    | Frameshift           | 20% |
| MM12T | MAP2    | microtubule-associated protein 2                                                    | CCDS2384.1     | chr2_210560646-210560646_G_A | 1251R>H | Substitution | Nonsynonymous coding | 26% |
| MM12T | MAP2    | microtubule-associated protein 2                                                    | CCDS2384.1     | chr2_210574869-210574869_C_T | 1655A>V | Substitution | Nonsynonymous coding | 12% |
| MM12T | MAP3K1  | mitogen-activated protein kinase kinase kinase 1, E3 ubiquitin protein ligase       | CCDS43318.1    | chr5_56161221-56161221_C_T   | 364R>W  | Substitution | Nonsynonymous coding | 23% |
| MM12T | MAP3K10 | mitogen-activated protein kinase kinase kinase 10                                   | CCDS12549.1    | chr19_40710421-40710421_C_T  | 298T>M  | Substitution | Nonsynonymous coding | 24% |
| MM12T | MAP3K10 | mitogen-activated protein kinase kinase kinase 10                                   | CCDS12549.1    | chr19_40719501-40719501_C_T  | 639P>S  | Substitution | Nonsynonymous coding | 34% |
| MM12T | MAP3K12 | mitogen-activated protein kinase kinase kinase 12                                   | CCDS8860.1     | chr12_53877433-53877433_G_A  | 445A>V  | Substitution | Nonsynonymous coding | 11% |
| MM12T | MAP3K14 | mitogen-activated protein kinase kinase kinase 14                                   | ENST0000344686 | chr17_43342550-43342550_C_T  | 886A>T  | Substitution | Nonsynonymous coding | 13% |
| MM12T | MAP3K4  | mitogen-activated protein kinase kinase kinase 4                                    | CCDS34565.1    | chr6_161494612-161494612_G_A | 689A>T  | Substitution | Nonsynonymous coding | 18% |
| MM12T | MAP3K5  | mitogen-activated protein kinase kinase kinase 5                                    | CCDS5179.1     | chr6_137019666-137019666_C_T | 256R>H  | Substitution | Nonsynonymous coding | 41% |
| MM12T | MAP3K7  | mitogen-activated protein kinase kinase kinase 7                                    | CCDS5028.1     | chr6_91257806-91257806_C_T   | 347R>H  | Substitution | Nonsynonymous coding | 16% |
| MM12T | MAP3K7  | mitogen-activated protein kinase kinase kinase 7                                    | CCDS5028.1     | chr6_91271364-91271364_G_T   | 107A>D  | Substitution | Nonsynonymous coding | 25% |
| MM12T | MAP4    | microtubule-associated protein 4                                                    | CCDS33750.1    | chr3_47958547-47958547_T_C   | 257E>G  | Substitution | Nonsynonymous coding | 36% |
| MM12T | MAP4K3  | mitogen-activated protein kinase kinase kinase 3                                    | CCDS1803.1     | chr2_39552733-39552733_C_T   | 282A>T  | Substitution | Nonsynonymous coding | 31% |
| MM12T | MAP4K5  | mitogen-activated protein kinase kinase kinase 5                                    | NM_006575      | chr14_50930796-50930796__T   | NA      | Insertion    | Frameshift           | 31% |
| MM12T | MAP6    | microtubule-associated protein 6                                                    | CCDS31641.1    | chr11_75298840-75298840_G_T  | 569P>H  | Substitution | Nonsynonymous coding | 27% |
| MM12T | MAP7    | microtubule-associated protein 7                                                    | CCDS5178.1     | chr6_136687523-136687523_G_A | 311R>X  | Substitution | Nonsense             | 22% |
| MM12T | MAP7D3  | MAP7 domain containing 3                                                            | CCDS44004.1    | chrX_135333460-135333460_G_A | 20R>W   | Substitution | Nonsynonymous coding | 42% |
| MM12T | MAPK1   | mitogen-activated protein kinase 1                                                  | CCDS13795.1    | chr22_22142570-22142570_G_T  | 278L>M  | Substitution | Nonsynonymous coding | 28% |
| MM12T | MAPK10  | mitogen-activated protein kinase 10                                                 | CCDS34026.1    | chr4_87019681-87019681_C_A   | 266R>S  | Substitution | Nonsynonymous coding | 35% |
| MM12T | MAPK13  | mitogen-activated protein kinase 13                                                 | CCDS4818.1     | chr6_36106832-36106832_C_T   | 340Q>X  | Substitution | Nonsense             | 11% |
| MM12T | MAPK4   | mitogen-activated protein kinase 4                                                  | CCDS42437.1    | chr18_48248440-48248440_G_A  | 275R>H  | Substitution | Nonsynonymous coding | 14% |
| MM12T | MARK2   | MAP/microtubule affinity-regulating kinase 2                                        | CCDS41665.1    | chr11_63670587-63670587_C_T  | 457R>W  | Substitution | Nonsynonymous coding | 11% |
| MM12T | MARS2   | methionyl-tRNA synthetase 2, mitochondrial                                          | CCDS33358.1    | chr2_198571112-198571112_G_A | 328G>D  | Substitution | Nonsynonymous coding | 18% |
| MM12T | MASP1   | mannan-binding lectin serine peptidase 1 (C4/C2 activating component of Ra-reactive | CCDS33908.1    | chr3_186953596-186953596_C_  | NA      | Deletion     | Frameshift           | 32% |

|       |        |                                                                   |                 |                               |         |              |                      |     |
|-------|--------|-------------------------------------------------------------------|-----------------|-------------------------------|---------|--------------|----------------------|-----|
| MM12T | MAST1  | microtubule associated serine/threonine kinase 1                  | CCDS32921.1     | chr19_12949465-12949465_A_G   | 27K>E   | Substitution | Nonsynonymous coding | 29% |
| MM12T | MAST2  | microtubule associated serine/threonine kinase 2                  | CCDS41326.1     | chr1_46290181-46290181_T_G    | 85V>G   | Substitution | Nonsynonymous coding | 30% |
| MM12T | MAST2  | microtubule associated serine/threonine kinase 2                  | CCDS41326.1     | chr1_46497185-46497185_C_T    | 1039R>C | Substitution | Nonsynonymous coding | 38% |
| MM12T | MAST2  | microtubule associated serine/threonine kinase 2                  | CCDS41326.1     | chr1_46501116-46501116_C_A    | 1592A>D | Substitution | Nonsynonymous coding | 28% |
| MM12T | MASTL  | microtubule associated serine/threonine kinase-like               | CCDS7153.1      | chr10_27462119-27462119_G_A   | 732V>I  | Substitution | Nonsynonymous coding | 26% |
| MM12T | MAT2A  | methionine adenosyltransferase II, alpha                          | CCDS1977.1      | chr2_85769051-85769051_C_G    | 169R>G  | Substitution | Nonsynonymous coding | 23% |
| MM12T | MAT2A  | methionine adenosyltransferase II, alpha                          | CCDS1977.1      | chr2_85769760-85769760_G_A    | 281A>T  | Substitution | Nonsynonymous coding | 10% |
| MM12T | MAU2   | MAU2 chromatid cohesion factor homolog (C. elegans)               | CCDS32969.2     | chr19_19456116-19456116_C_A   | 387L>M  | Substitution | Nonsynonymous coding | 36% |
| MM12T | MAX    | MYC associated factor X                                           | ENST00000441116 | chr14_65568305-65568305_A_    | NA      | Deletion     | Frameshift           | 56% |
| MM12T | MBD5   | methyl-CpG binding domain protein 5                               | CCDS33302.1     | chr2_149226977-149226977_C_T  | 489P>S  | Substitution | Nonsynonymous coding | 12% |
| MM12T | MBL2   | mannose-binding lectin (protein C) 2, soluble                     | CCDS7247.1      | chr10_54531365-54531365_G_A   | 11L>F   | Substitution | Nonsynonymous coding | 22% |
| MM12T | MBTPS1 | membrane-bound transcription factor peptidase, site 1             | CCDS10941.1     | chr16_84092952-84092952_C_T   | 929R>H  | Substitution | Nonsynonymous coding | 31% |
| MM12T | MBTPS1 | membrane-bound transcription factor peptidase, site 1             | CCDS10941.1     | chr16_84120995-84120995_C_T   | 368A>T  | Substitution | Nonsynonymous coding | 11% |
| MM12T | MCCC1  | methylcrotonoyl-CoA carboxylase 1 (alpha)                         | CCDS3241.1      | chr3_182755057-182755057_G_A  | 515L>F  | Substitution | Nonsynonymous coding | 32% |
| MM12T | MCCC1  | methylcrotonoyl-CoA carboxylase 1 (alpha)                         | CCDS3241.1      | chr3_182789122-182789122_G_T  | 172A>D  | Substitution | Nonsynonymous coding | 36% |
| MM12T | MCEE   | methylmalonyl CoA epimerase                                       | CCDS1915.1      | chr2_71337204-71337204_G_A    | 143R>C  | Substitution | Nonsynonymous coding | 16% |
| MM12T | MCEE   | methylmalonyl CoA epimerase                                       | CCDS1915.1      | chr2_71351631-71351631_G_A    | 28A>V   | Substitution | Nonsynonymous coding | 31% |
| MM12T | MCF2   | MCF.2 cell line derived transforming sequence                     | CCDS48175.1     | chrX_138699776-138699776_T_C  | 359R>G  | Substitution | Nonsynonymous coding | 41% |
| MM12T | MCF2L  | MCF.2 cell line derived transforming sequence-like                | CCDS45070.1     | chr13_113729393-113729393_C_T | 457R>C  | Substitution | Nonsynonymous coding | 31% |
| MM12T | MCF2L  | MCF.2 cell line derived transforming sequence-like                | ENST00000375591 | chr13_113749347-113749347_A_G | 840H>R  | Substitution | Nonsynonymous coding | 28% |
| MM12T | MCF2L  | MCF.2 cell line derived transforming sequence-like                | CCDS45070.1     | chr13_113679076-113679076_C_T | ISV+4>  | Substitution | Splice site donor    | 13% |
| MM12T | MCF2L  | MCF.2 cell line derived transforming sequence-like                | CCDS45070.1     | chr13_113731375-113731375_C_T | 561R>X  | Substitution | Nonsense             | 29% |
| MM12T | MCF2L2 | MCF.2 cell line derived transforming sequence-like 2              | CCDS3243.1      | chr3_182913016-182913016_C_T  | 971S>N  | Substitution | Nonsynonymous coding | 22% |
| MM12T | MCF2L2 | MCF.2 cell line derived transforming sequence-like 2              | CCDS3243.1      | chr3_183056623-183056623_T_C  | 151K>E  | Substitution | Nonsynonymous coding | 31% |
| MM12T | MCF2L2 | MCF.2 cell line derived transforming sequence-like 2              | CCDS3243.1      | chr3_183097186-183097186_C_A  | 58E>D   | Substitution | Nonsynonymous coding | 34% |
| MM12T | MCM10  | minichromosome maintenance complex component 10                   | CCDS7096.1      | chr10_13251120-13251120_A_G   | 844D>G  | Substitution | Nonsynonymous coding | 31% |
| MM12T | MCM2   | minichromosome maintenance complex component 2                    | CCDS3043.1      | chr3_127325138-127325138_G_A  | 284R>H  | Substitution | Nonsynonymous coding | 12% |
| MM12T | MCM3AP | minichromosome maintenance complex component 3 associated protein | CCDS13734.1     | chr21_47660801-47660801_G_A   | 1853R>X | Substitution | Nonsense             | 18% |
| MM12T | MCM5   | minichromosome maintenance complex component 5                    | CCDS13915.1     | chr22_35804534-35804534_C_T   | 244H>Y  | Substitution | Nonsynonymous coding | 46% |
| MM12T | MCM5   | minichromosome maintenance complex component 5                    | CCDS13915.1     | chr22_35812354-35812354_C_G   | 457A>G  | Substitution | Nonsynonymous coding | 32% |
| MM12T | MCM7   | minichromosome maintenance complex component 7                    | CCDS5683.1      | chr7_99693535-99693535_G_A    | 486A>V  | Substitution | Nonsynonymous coding | 11% |
| MM12T | MCM9   | minichromosome maintenance complex component 9                    | ENST00000316316 | chr6_119137101-119137101_G_A  | 773A>V  | Substitution | Nonsynonymous coding | 10% |

|       |        |                                              |                 |                               |         |              |                      |     |
|-------|--------|----------------------------------------------|-----------------|-------------------------------|---------|--------------|----------------------|-----|
| MM12T | MCOLN1 | mucolipin 1                                  | ENST00000394321 | chr19_7592623-7592623_G_A     | 150R>H  | Substitution | Nonsynonymous coding | 10% |
| MM12T | MCOLN1 | mucolipin 1                                  | CCDS12180.1     | chr19_7592790-7592790_A_G     | 241N>D  | Substitution | Nonsynonymous coding | 16% |
| MM12T | MCOLN3 | mucolipin 3                                  | CCDS701.1       | chr1_85506800-85506800_C_T    | 97A>T   | Substitution | Nonsynonymous coding | 39% |
| MM12T | MCPH1  | microcephalin 1                              | CCDS43689.1     | chr8_6266841-6266841_G_T      | 22E>X   | Substitution | Nonsense             | 31% |
| MM12T | MCTP2  | multiple C2 domains, transmembrane 2         | CCDS32338.1     | chr15_94901790-94901790_A_G   | 417D>G  | Substitution | Nonsynonymous coding | 30% |
| MM12T | MDC1   | mediator of DNA-damage checkpoint 1          | CCDS34384.1     | chr6_30670539-30670539_C_T    | 1994R>K | Substitution | Nonsynonymous coding | 22% |
| MM12T | MDC1   | mediator of DNA-damage checkpoint 1          | CCDS34384.1     | chr6_30671203-30671203_C_A    | 1892A>S | Substitution | Nonsynonymous coding | 20% |
| MM12T | MDH1B  | malate dehydrogenase 1B, NAD (soluble)       | CCDS33365.1     | chr2_207619795-207619795_G_A  | 283A>V  | Substitution | Nonsynonymous coding | 37% |
| MM12T | MDN1   | MDN1, midasin homolog (yeast)                | CCDS5024.1      | chr6_90385891-90385891_C_T    | 4192C>Y | Substitution | Nonsynonymous coding | 18% |
| MM12T | MDN1   | MDN1, midasin homolog (yeast)                | CCDS5024.1      | chr6_90388327-90388327_C_T    | 4135A>T | Substitution | Nonsynonymous coding | 41% |
| MM12T | MDN1   | MDN1, midasin homolog (yeast)                | CCDS5024.1      | chr6_90405345-90405345_C_A    | 3250K>N | Substitution | Nonsynonymous coding | 61% |
| MM12T | MEA1   | male-enhanced antigen 1                      | CCDS4879.1      | chr6_42981113-42981113_C_T    | 15A>T   | Substitution | Nonsynonymous coding | 52% |
| MM12T | MECOM  | MDS1 and EVI1 complex locus                  | CCDS3205.1      | chr3_168833367-168833367_G_A  | 577P>S  | Substitution | Nonsynonymous coding | 30% |
| MM12T | MECP2  | methyl CpG binding protein 2 (Rett syndrome) | CCDS48193.1     | chrX_153295900-153295900_T_C  | 472D>G  | Substitution | Nonsynonymous coding | 11% |
| MM12T | MECP2  | methyl CpG binding protein 2 (Rett syndrome) | CCDS48193.1     | chrX_153297785-153297785_G_A  | 96R>W   | Substitution | Nonsynonymous coding | 16% |
| MM12T | MED12  | mediator complex subunit 12                  | CCDS43970.1     | chrX_70340896-70340896_C_T    | 210A>V  | Substitution | Nonsynonymous coding | 31% |
| MM12T | MED12  | mediator complex subunit 12                  | CCDS43970.1     | chrX_70346966-70346966_G_A    | 945A>T  | Substitution | Nonsynonymous coding | 14% |
| MM12T | MED12  | mediator complex subunit 12                  | CCDS43970.1     | chrX_70354962-70354962_G_T    | 1628Q>H | Substitution | Nonsynonymous coding | 27% |
| MM12T | MED12L | mediator complex subunit 12-like             | CCDS33876.1     | chr3_150845721-150845721_C_T  | 169A>V  | Substitution | Nonsynonymous coding | 28% |
| MM12T | MED12L | mediator complex subunit 12-like             | CCDS33876.1     | chr3_151075148-151075148_G_A  | 902A>T  | Substitution | Nonsynonymous coding | 29% |
| MM12T | MED13L | mediator complex subunit 13-like             | CCDS9177.1      | chr12_116446448-116446448_C_A | 590Q>H  | Substitution | Nonsynonymous coding | 13% |
| MM12T | MED13L | mediator complex subunit 13-like             | CCDS9177.1      | chr12_116446494-116446494_G_A | 575S>L  | Substitution | Nonsynonymous coding | 20% |
| MM12T | MED14  | mediator complex subunit 14                  | CCDS14254.1     | chrX_40513713-40513713_C_A    | 1398Q>H | Substitution | Nonsynonymous coding | 27% |
| MM12T | MED15  | mediator complex subunit 15                  | CCDS33602.1     | chr22_20891439-20891439_G_T   | 35S>I   | Substitution | Nonsynonymous coding | 38% |
| MM12T | MED16  | mediator complex subunit 16                  | CCDS12047.1     | chr19_886195-886195_C_T       | 152A>T  | Substitution | Nonsynonymous coding | 35% |
| MM12T | MED19  | mediator complex subunit 19                  | CCDS7966.1      | chr11_57472557-57472557_G_A   | 121S>F  | Substitution | Nonsynonymous coding | 18% |
| MM12T | MED22  | mediator complex subunit 22                  | CCDS6963.1      | chr9_136213427-136213427_C_T  | 31D>N   | Substitution | Nonsynonymous coding | 12% |
| MM12T | MED23  | mediator complex subunit 23                  | CCDS5147.1      | chr6_131941863-131941863_C_A  | 168A>S  | Substitution | Nonsynonymous coding | 35% |
| MM12T | MED24  | mediator complex subunit 24                  | CCDS11359.1     | chr17_38178959-38178959_G_T   | 791L>M  | Substitution | Nonsynonymous coding | 16% |
| MM12T | MED24  | mediator complex subunit 24                  | CCDS11359.1     | chr17_38187463-38187463_C_T   | 368G>D  | Substitution | Nonsynonymous coding | 14% |
| MM12T | MED8   | mediator complex subunit 8                   | CCDS486.2       | chr1_43850143-43850143_T_     | NA      | Deletion     | Frameshift           | 18% |
| MM12T | MEF2C  | myocyte enhancer factor 2C                   | CCDS47245.1     | chr5_88100467-88100467_T_C    | 69Y>C   | Substitution | Nonsynonymous coding | 15% |

|       |         |                                                                                      |                 |                               |         |              |                      |     |
|-------|---------|--------------------------------------------------------------------------------------|-----------------|-------------------------------|---------|--------------|----------------------|-----|
| MM12T | MEGF10  | multiple EGF-like-domains 10                                                         | CCDS4142.1      | chr5_126790302-126790302_G_T  | 1009D>Y | Substitution | Nonsynonymous coding | 13% |
| MM12T | MEGF6   | multiple EGF-like-domains 6                                                          | CCDS41237.1     | chr1_3422790-3422790_C_A      | 600K>N  | Substitution | Nonsynonymous coding | 31% |
| MM12T | MEGF6   | multiple EGF-like-domains 6                                                          | CCDS41237.1     | chr1_3417615-3417615_G_T      | 830C>X  | Substitution | Nonsense             | 32% |
| MM12T | MEIS1   | Meis homeobox 1                                                                      | CCDS46309.1     | chr2_66664959-66664959_C_T    | 35P>S   | Substitution | Nonsynonymous coding | 13% |
| MM12T | MEIS1   | Meis homeobox 1                                                                      | ENST00000407092 | chr2_66798505-66798505_G_A    | 414M>I  | Substitution | Nonsynonymous coding | 10% |
| MM12T | MELK    | maternal embryonic leucine zipper kinase                                             | CCDS6606.1      | chr9_36589629-36589629_A_     | NA      | Deletion     | Frameshift           | 18% |
| MM12T | MEP1A   | meprin A, alpha (PABA peptide hydrolase)                                             | CCDS4918.1      | chr6_46797216-46797216_C_T    | 351T>M  | Substitution | Nonsynonymous coding | 15% |
| MM12T | MEP1B   | meprin A, beta                                                                       | CCDS45846.1     | chr18_29793468-29793468_C_T   | 509R>X  | Substitution | Nonsense             | 11% |
| MM12T | MESP2   | mesoderm posterior 2 homolog (mouse)                                                 | CCDS42078.1     | chr15_90320226-90320226_C_T   | 213A>V  | Substitution | Nonsynonymous coding | 12% |
| MM12T | MET     | met proto-oncogene (hepatocyte growth factor receptor)                               | CCDS47689.1     | chr7_116435978-116435978_G_A  | 1343E>K | Substitution | Nonsynonymous coding | 21% |
| MM12T | METTL1  | methyltransferase like 1                                                             | CCDS8955.3      | chr12_58163106-58163106_G_A   | 219R>C  | Substitution | Nonsynonymous coding | 15% |
| MM12T | METTL14 | methyltransferase like 14                                                            | CCDS34053.1     | chr4_119610559-119610559_C_T  | 64R>C   | Substitution | Nonsynonymous coding | 28% |
| MM12T | METTL14 | methyltransferase like 14                                                            | CCDS34053.1     | chr4_119618369-119618369_T_C  | 179I>T  | Substitution | Nonsynonymous coding | 11% |
| MM12T | METTL17 | methyltransferase like 17                                                            | CCDS41913.1     | chr14_21458205-21458205_G_A   | 15C>Y   | Substitution | Nonsynonymous coding | 13% |
| MM12T | METTL17 | methyltransferase like 17                                                            | CCDS41913.1     | chr14_21463358-21463358_G_T   | 304S>I  | Substitution | Nonsynonymous coding | 17% |
| MM12T | METTL23 | methyltransferase like 23                                                            | CCDS45787.1     | chr17_74729220-74729220_G_A   | 82G>D   | Substitution | Nonsynonymous coding | 16% |
| MM12T | METTL6  | methyltransferase like 6                                                             | CCDS43056.1     | chr3_15452786-15452786_G_T    | 278L>M  | Substitution | Nonsynonymous coding | 21% |
| MM12T | METTL8  | methyltransferase like 8                                                             | NM_024770       | chr2_172180740-172180740_G_T  | 389P>Q  | Substitution | Nonsynonymous coding | 45% |
| MM12T | MFAP3L  | microfibrillar-associated protein 3-like                                             | CCDS34103.1     | chr4_170912961-170912961_C_A  | 266Q>H  | Substitution | Nonsynonymous coding | 36% |
| MM12T | MFF     | mitochondrial fission factor                                                         | CCDS2465.1      | chr2_228205057-228205057_C_A  | 160A>D  | Substitution | Nonsynonymous coding | 32% |
| MM12T | MFGE8   | milk fat globule-EGF factor 8 protein                                                | CCDS10347.1     | chr15_89449105-89449105_C_T   | 190A>T  | Substitution | Nonsynonymous coding | 31% |
| MM12T | MFHAS1  | malignant fibrous histiocytoma amplified sequence 1                                  | CCDS34844.1     | chr8_8747686-8747686_T        | NA      | Insertion    | Frameshift           | 21% |
| MM12T | MF12    | antigen p97 (melanoma associated) identified by monoclonal antibodies 133.2 and 96.5 | CCDS3325.1      | chr3_196735716-196735716_C_A  | 549S>I  | Substitution | Nonsynonymous coding | 32% |
| MM12T | MF12    | antigen p97 (melanoma associated) identified by monoclonal antibodies 133.2 and 96.5 | CCDS3325.1      | chr3_196742244-196742244_G_A  | 409R>W  | Substitution | Nonsynonymous coding | 28% |
| MM12T | MFNG    | MFNG O-fucosylpeptide 3-beta-N-acetylglucosaminyltransferase                         | CCDS13947.1     | chr22_37870629-37870629_C_T   | 245G>D  | Substitution | Nonsynonymous coding | 37% |
| MM12T | MFRP    | membrane frizzled-related protein                                                    | CCDS8421.1      | chr11_119212269-119212269_C_T | 577A>T  | Substitution | Nonsynonymous coding | 32% |
| MM12T | MFSD2B  | major facilitator superfamily domain containing 2B                                   | CCDS46228.1     | chr2_24236251-24236251_C_A    | 65L>M   | Substitution | Nonsynonymous coding | 35% |
| MM12T | MFSD6   | major facilitator superfamily domain containing 6                                    | CCDS2306.1      | chr2_191300954-191300954_G_A  | 67D>N   | Substitution | Nonsynonymous coding | 13% |
| MM12T | MFSD6L  | major facilitator superfamily domain containing 6-like                               | CCDS11146.1     | chr17_8701874-8701874_G_A     | 189P>S  | Substitution | Nonsynonymous coding | 27% |
| MM12T | MGA     | MGA, MAX dimerization protein                                                        | NM_001164273    | chr15_41989002-41989002_G_T   | 598K>N  | Substitution | Nonsynonymous coding | 26% |
| MM12T | MGA     | MGA, MAX dimerization protein                                                        | NM_001164273    | chr15_42041026-42041026_A_G   | 1802R>G | Substitution | Nonsynonymous coding | 34% |
| MM12T | MGA     | MGA, MAX dimerization protein                                                        | NM_001164273    | chr15_42042505-42042505_G_A   | 2234A>T | Substitution | Nonsynonymous coding | 24% |

|       |         |                                                                                        |              |                               |         |              |                      |     |
|-------|---------|----------------------------------------------------------------------------------------|--------------|-------------------------------|---------|--------------|----------------------|-----|
| MM12T | MGAM    | maltase-glucoamylase (alpha-glucosidase)                                               | CCDS47727.1  | chr7_141722139-141722139_C_G  | 261T>S  | Substitution | Nonsynonymous coding | 30% |
| MM12T | MGAM    | maltase-glucoamylase (alpha-glucosidase)                                               | CCDS47727.1  | chr7_141724872-141724872_C_T  | 302A>V  | Substitution | Nonsynonymous coding | 11% |
| MM12T | MGAM    | maltase-glucoamylase (alpha-glucosidase)                                               | CCDS47727.1  | chr7_141797430-141797430_G_A  | 1681R>H | Substitution | Nonsynonymous coding | 33% |
| MM12T | MGAM    | maltase-glucoamylase (alpha-glucosidase)                                               | CCDS47727.1  | chr7_141736778-141736778_G_A  | ISV+1>  | Substitution | Splice site donor    | 11% |
| MM12T | MGARP   | mitochondria-localized glutamic acid-rich protein                                      | CCDS43269.1  | chr4_140188177-140188177_G_A  | 100A>V  | Substitution | Nonsynonymous coding | 16% |
| MM12T | MGAT4B  | mannosyl (alpha-1,3-)-glycoprotein beta-1,4-N-acetylglucosaminyltransferase, isozyme B | CCDS4449.1   | chr5_179228804-179228804_C_T  | 103R>H  | Substitution | Nonsynonymous coding | 11% |
| MM12T | MGAT4B  | mannosyl (alpha-1,3-)-glycoprotein beta-1,4-N-acetylglucosaminyltransferase, isozyme B | CCDS4449.1   | chr5_179228846-179228846_G_A  | 89A>V   | Substitution | Nonsynonymous coding | 37% |
| MM12T | MGAT4C  | mannosyl (alpha-1,3-)-glycoprotein beta-1,4-N-acetylglucosaminyltransferase, isozyme C | CCDS9030.1   | chr12_86373677-86373677_A_    | NA      | Deletion     | Frameshift           | 22% |
| MM12T | MGAT5   | mannosyl (alpha-1,6-)-glycoprotein beta-1,6-N-acetylglucosaminyltransferase            | CCDS2171.1   | chr2_135206222-135206222_A_G  | 677Y>C  | Substitution | Nonsynonymous coding | 41% |
| MM12T | MGST1   | microsomal glutathione S-transferase 1                                                 | CCDS8677.1   | chr12_16510545-16510545_G_A   | 45A>T   | Substitution | Nonsynonymous coding | 35% |
| MM12T | MIA3    | melanoma inhibitory activity family, member 3                                          | CCDS41470.1  | chr1_222794539-222794539_G_A  | 58G>S   | Substitution | Nonsynonymous coding | 30% |
| MM12T | MIB1    | mindbomb E3 ubiquitin protein ligase 1                                                 | CCDS11871.1  | chr18_19321602-19321602_C_T   | 20R>C   | Substitution | Nonsynonymous coding | 36% |
| MM12T | MIB1    | mindbomb E3 ubiquitin protein ligase 1                                                 | CCDS11871.1  | chr18_19345871-19345871_G_A   | 123R>H  | Substitution | Nonsynonymous coding | 37% |
| MM12T | MIB2    | mindbomb E3 ubiquitin protein ligase 2                                                 | CCDS41224.1  | chr1_1563938-1563938_C_A      | 738H>N  | Substitution | Nonsynonymous coding | 30% |
| MM12T | MICAL1  | microtubule associated monooxygenase, calponin and LIM domain containing 1             | CCDS5076.1   | chr6_109767434-109767434_G_T  | 829P>H  | Substitution | Nonsynonymous coding | 25% |
| MM12T | MICALL2 | MICAL-like 2                                                                           | CCDS5324.1   | chr7_1477748-1477748_G_A      | 766R>W  | Substitution | Nonsynonymous coding | 10% |
| MM12T | MIIP    | migration and invasion inhibitory protein                                              | CCDS143.1    | chr1_12090096-12090096_C_T    | 286P>L  | Substitution | Nonsynonymous coding | 32% |
| MM12T | MINK1   | misshapen-like kinase 1                                                                | CCDS45588.1  | chr17_4789858-4789858_C_T     | 296R>W  | Substitution | Nonsynonymous coding | 21% |
| MM12T | MINK1   | misshapen-like kinase 1                                                                | CCDS45588.1  | chr17_4793989-4793989_C_T     | 509R>W  | Substitution | Nonsynonymous coding | 25% |
| MM12T | MIR1307 | microRNA 1307                                                                          | hsa-mir-1307 | chr10_105154104-105154104_T_G | 19T>P   | Substitution | Nonsynonymous coding | 33% |
| MM12T | MIR331  | microRNA 331                                                                           | hsa-mir-331  | chr12_95702218-95702218_G_A   | 8C>Y    | Substitution | Nonsynonymous coding | 38% |
| MM12T | MIR411  | microRNA 411                                                                           | hsa-mir-411  | chr14_101489692-101489692_C_T | 11R>C   | Substitution | Nonsynonymous coding | 15% |
| MM12T | MIR425  | microRNA 425                                                                           | hsa-mir-425  | chr3_49057595-49057595_C_T    | 25A>T   | Substitution | Nonsynonymous coding | 16% |
| MM12T | MIR429  | microRNA 429                                                                           | hsa-mir-429  | chr1_1104389-1104389_G_A      | 2R>Q    | Substitution | Nonsynonymous coding | 29% |
| MM12T | MIR448  | microRNA 448                                                                           | hsa-mir-448  | chrX_114058123-114058123_C_T  | 36S>L   | Substitution | Nonsynonymous coding | 15% |
| MM12T | MIR573  | microRNA 573                                                                           | hsa-mir-573  | chr4_24521841-24521841_G_A    | 25R>C   | Substitution | Nonsynonymous coding | 44% |
| MM12T | MIR675  | microRNA 675                                                                           | hsa-mir-675  | chr11_2018019-2018019_G_A     | 15R>C   | Substitution | Nonsynonymous coding | 13% |
| MM12T | MIR885  | microRNA 885                                                                           | hsa-mir-885  | chr3_10436209-10436209_T_C    | 13H>R   | Substitution | Nonsynonymous coding | 33% |
| MM12T | MIXL1   | Mix paired-like homeobox                                                               | CCDS1552.1   | chr1_226413271-226413271_G_A  | 153A>T  | Substitution | Nonsynonymous coding | 36% |
| MM12T | MKI67   | antigen identified by monoclonal antibody Ki-67                                        | CCDS7659.1   | chr10_129904502-129904502_C_T | 1868D>N | Substitution | Nonsynonymous coding | 43% |
| MM12T | MKI67   | antigen identified by monoclonal antibody Ki-67                                        | CCDS7659.1   | chr10_129905210-129905210_G_A | 1632R>W | Substitution | Nonsynonymous coding | 31% |
| MM12T | MKLN1   | muskelin 1, intracellular mediator containing kelch motifs                             | CCDS34754.1  | chr7_131082131-131082131_G_T  | 169S>I  | Substitution | Nonsynonymous coding | 21% |

|       |        |                                                                                          |                 |                               |         |              |                      |     |
|-------|--------|------------------------------------------------------------------------------------------|-----------------|-------------------------------|---------|--------------|----------------------|-----|
| MM12T | MKNK1  | MAP kinase interacting serine/threonine kinase 1                                         | CCDS538.1       | chr1_47027182-47027182_C_T    | 366A>T  | Substitution | Nonsynonymous coding | 34% |
| MM12T | MKRN2  | makorin ring finger protein 2                                                            | CCDS33702.1     | chr3_12611712-12611712_G_A    | 100G>R  | Substitution | Nonsynonymous coding | 33% |
| MM12T | MLIP   | muscular LMNA-interacting protein                                                        | CCDS4954.1      | chr6_54066922-54066922_G_A    | 335R>H  | Substitution | Nonsynonymous coding | 13% |
| MM12T | MLKL   | mixed lineage kinase domain-like                                                         | CCDS32487.1     | chr16_74708978-74708978_G_A   | 421R>C  | Substitution | Nonsynonymous coding | 15% |
| MM12T | MLL    | myeloid/lymphoid or mixed-lineage leukemia (trithorax homolog, Drosophila)               | CCDS31686.1     | chr11_118372555-118372555_G_A | 2160R>Q | Substitution | Nonsynonymous coding | 31% |
| MM12T | MLL    | myeloid/lymphoid or mixed-lineage leukemia (trithorax homolog, Drosophila)               | CCDS31686.1     | chr11_118342376-118342376_G_A | ISV-1>  | Substitution | Splice site acceptor | 31% |
| MM12T | MLL2   | myeloid/lymphoid or mixed-lineage leukemia 2                                             | CCDS44873.1     | chr12_49431726-49431726_G_A   | 3138T>I | Substitution | Nonsynonymous coding | 10% |
| MM12T | MLL2   | myeloid/lymphoid or mixed-lineage leukemia 2                                             | CCDS44873.1     | chr12_49448112-49448112_G_A   | 163A>V  | Substitution | Nonsynonymous coding | 32% |
| MM12T | MLL2   | myeloid/lymphoid or mixed-lineage leukemia 2                                             | CCDS44873.1     | chr12_49431178-49431178_G_A   | 3321R>X | Substitution | Nonsense             | 34% |
| MM12T | MLL3   | myeloid/lymphoid or mixed-lineage leukemia 3                                             | CCDS5931.1      | chr7_151845314-151845314_C_G  | 4566M>I | Substitution | Nonsynonymous coding | 33% |
| MM12T | MLL5   | myeloid/lymphoid or mixed-lineage leukemia 5 (trithorax homolog, Drosophila)             | CCDS34723.1     | chr7_104753679-104753679_G_T  | 1826G>X | Substitution | Nonsense             | 26% |
| MM12T | MLLT10 | myeloid/lymphoid or mixed-lineage leukemia (trithorax homolog, Drosophila); translocated | CCDS7135.1      | chr10_22019826-22019826_C_T   | ISV-3>  | Substitution | Splice site acceptor | 31% |
| MM12T | MLLT6  | myeloid/lymphoid or mixed-lineage leukemia (trithorax homolog, Drosophila); translocated | CCDS11327.1     | chr17_36878343-36878343_G     | NA      | Insertion    | Frameshift           | 26% |
| MM12T | MLXIPL | MLX interacting protein-like                                                             | CCDS5553.1      | chr7_73010593-73010593_G_A    | 650R>W  | Substitution | Nonsynonymous coding | 30% |
| MM12T | MLXIPL | MLX interacting protein-like                                                             | CCDS5553.1      | chr7_73010971-73010971_C_T    | 607S>N  | Substitution | Nonsynonymous coding | 32% |
| MM12T | MMP1   | matrix metalloproteinase 1 (interstitial collagenase)                                    | CCDS8322.1      | chr11_102665974-102665974_G_A | 277A>V  | Substitution | Nonsynonymous coding | 29% |
| MM12T | MMP11  | matrix metalloproteinase 11 (stromelysin 3)                                              | CCDS13816.1     | chr22_24124523-24124523_G_A   | 396E>K  | Substitution | Nonsynonymous coding | 32% |
| MM12T | MMP11  | matrix metalloproteinase 11 (stromelysin 3)                                              | CCDS13816.1     | chr22_24125687-24125687_C_T   | 475P>S  | Substitution | Nonsynonymous coding | 37% |
| MM12T | MMP12  | matrix metalloproteinase 12 (macrophage elastase)                                        | ENST00000326227 | chr11_102743635-102743635_G_A | 104P>S  | Substitution | Nonsynonymous coding | 14% |
| MM12T | MMP12  | matrix metalloproteinase 12 (macrophage elastase)                                        | ENST00000326227 | chr11_102737997-102737997_C_A | ISV+4>  | Substitution | Splice site donor    | 39% |
| MM12T | MMP14  | matrix metalloproteinase 14 (membrane-inserted)                                          | CCDS9577.1      | chr14_23312973-23312973_G_A   | 302R>Q  | Substitution | Nonsynonymous coding | 32% |
| MM12T | MMP17  | matrix metalloproteinase 17 (membrane-inserted)                                          | CCDS31927.1     | chr12_132325257-132325257_G_A | 188D>N  | Substitution | Nonsynonymous coding | 32% |
| MM12T | MMP25  | matrix metalloproteinase 25                                                              | CCDS10492.1     | chr16_3100415-3100415_G_A     | 177A>T  | Substitution | Nonsynonymous coding | 27% |
| MM12T | MMP25  | matrix metalloproteinase 25                                                              | CCDS10492.1     | chr16_3107058-3107058_C_T     | 229A>V  | Substitution | Nonsynonymous coding | 16% |
| MM12T | MMP26  | matrix metalloproteinase 26                                                              | CCDS7752.1      | chr11_5010915-5010915_C_T     | 46S>L   | Substitution | Nonsynonymous coding | 13% |
| MM12T | MMP28  | matrix metalloproteinase 28                                                              | ENST00000338839 | chr17_34100317-34100317_C_T   | 157A>T  | Substitution | Nonsynonymous coding | 10% |
| MM12T | MMP28  | matrix metalloproteinase 28                                                              | ENST00000338839 | chr17_34100375-34100375_C_T   | 138R>H  | Substitution | Nonsynonymous coding | 13% |
| MM12T | MMP9   | matrix metalloproteinase 9 (gelatinase B, 92kDa gelatinase, 92kDa type IV collagenase)   | CCDS13390.1     | chr20_44642002-44642002_G_A   | 480R>H  | Substitution | Nonsynonymous coding | 18% |
| MM12T | MMRN1  | multimerin 1                                                                             | CCDS3635.1      | chr4_90816409-90816409_G_T    | 96R>I   | Substitution | Nonsynonymous coding | 21% |
| MM12T | MMS22L | MMS22-like, DNA repair protein                                                           | CCDS5039.1      | chr6_97720606-97720606_C_A    | 194A>S  | Substitution | Nonsynonymous coding | 23% |
| MM12T | MN1    | meningioma (disrupted in balanced translocation) 1                                       | CCDS42998.1     | chr22_28194145-28194145_C_T   | 796R>H  | Substitution | Nonsynonymous coding | 42% |
| MM12T | MN1    | meningioma (disrupted in balanced translocation) 1                                       | CCDS42998.1     | chr22_28194622-28194622_G_A   | 637P>L  | Substitution | Nonsynonymous coding | 12% |

|       |          |                                           |                 |                               |         |              |                      |     |
|-------|----------|-------------------------------------------|-----------------|-------------------------------|---------|--------------|----------------------|-----|
| MM12T | MNS1     | meiosis-specific nuclear structural 1     | CCDS10158.1     | chr15_56726535-56726535_T_C   | 357Q>R  | Substitution | Nonsynonymous coding | 25% |
| MM12T | MNT      | MNT, MAX dimerization protein             | CCDS11018.1     | chr17_2290542-2290542_C_T     | 468A>T  | Substitution | Nonsynonymous coding | 18% |
| MM12T | MNT      | MNT, MAX dimerization protein             | CCDS11018.1     | chr17_2298377-2298377_G_T     | 149L>I  | Substitution | Nonsynonymous coding | 37% |
| MM12T | MNT      | MNT, MAX dimerization protein             | CCDS11018.1     | chr17_2291271-2291271_G_A     | 294Q>X  | Substitution | Nonsense             | 18% |
| MM12T | MOB2     | MOB kinase activator 2                    | ENST00000399693 | chr11_1491484-1491484_G_A     | 242A>V  | Substitution | Nonsynonymous coding | 27% |
| MM12T | MOB3C    | MOB kinase activator 3C                   | CCDS539.1       | chr1_47075751-47075751_C_T    | 234V>I  | Substitution | Nonsynonymous coding | 29% |
| MM12T | MOC3     | molybdenum cofactor synthesis 3           | CCDS13435.1     | chr20_49575725-49575725_G_A   | 116V>M  | Substitution | Nonsynonymous coding | 24% |
| MM12T | MOC3     | molybdenum cofactor synthesis 3           | CCDS13435.1     | chr20_49576517-49576517_C_T   | 380R>C  | Substitution | Nonsynonymous coding | 15% |
| MM12T | MON1A    | MON1 homolog A (yeast)                    | CCDS2808.2      | chr3_49948233-49948233_G_A    | 330A>V  | Substitution | Nonsynonymous coding | 11% |
| MM12T | MORC4    | MORC family CW-type zinc finger 4         | CCDS14525.2     | chrX_106186344-106186344_G_A  | 593P>S  | Substitution | Nonsynonymous coding | 32% |
| MM12T | MOSPD2   | motile sperm domain containing 2          | CCDS14162.1     | chrX_14937819-14937819_G_T    | 482R>M  | Substitution | Nonsynonymous coding | 22% |
| MM12T | MOXD1    | monoxygenase, DBH-like 1                  | CCDS5152.2      | chr6_132618353-132618353_G_T  | 594S>Y  | Substitution | Nonsynonymous coding | 35% |
| MM12T | MPEG1    | macrophage expressed 1                    | CCDS41650.1     | chr11_58979047-58979047_T_G   | 431N>T  | Substitution | Nonsynonymous coding | 11% |
| MM12T | MPEG1    | macrophage expressed 1                    | CCDS41650.1     | chr11_58979924-58979924_G_T   | 139L>I  | Substitution | Nonsynonymous coding | 18% |
| MM12T | MPHOSPH8 | M-phase phosphoprotein 8                  | CCDS9287.1      | chr13_20244433-20244433_C_T   | 796A>V  | Substitution | Nonsynonymous coding | 29% |
| MM12T | MPHOSPH9 | M-phase phosphoprotein 9                  | CCDS9243.1      | chr12_123706143-123706143_C_A | 64K>N   | Substitution | Nonsynonymous coding | 29% |
| MM12T | MPO      | myeloperoxidase                           | CCDS11604.1     | chr17_56356680-56356680_C_T   | 219R>H  | Substitution | Nonsynonymous coding | 13% |
| MM12T | MPPE1    | metallophosphoesterase 1                  | CCDS11853.1     | chr18_11886569-11886569_C_T   | 266A>T  | Substitution | Nonsynonymous coding | 34% |
| MM12T | MRAP     | melanocortin 2 receptor accessory protein | CCDS13613.1     | chr21_33671333-33671333_C_A   | 17Y>X   | Substitution | Nonsense             | 17% |
| MM12T | MRC2     | mannose receptor, C type 2                | CCDS11634.1     | chr17_60769794-60769794_G_A   | 1474M>I | Substitution | Nonsynonymous coding | 34% |
| MM12T | MROH1    | maestro heat-like repeat family member 1  | CCDS47938.1     | chr8_145235222-145235222_G_A  | 148A>T  | Substitution | Nonsynonymous coding | 39% |
| MM12T | MROH2A   | maestro heat-like repeat family member 2A | ENST00000396517 | chr2_234713698-234713698_C_T  | 696R>C  | Substitution | Nonsynonymous coding | 18% |
| MM12T | MROH7    | maestro heat-like repeat family member 7  | CCDS41342.2     | chr1_55158166-55158166_G_T    | 927E>D  | Substitution | Nonsynonymous coding | 19% |
| MM12T | MROH9    | maestro heat-like repeat family member 9  | CCDS41436.1     | chr1_170952602-170952602_G_T  | 219S>I  | Substitution | Nonsynonymous coding | 30% |
| MM12T | MRPL1    | mitochondrial ribosomal protein L1        | CCDS3583.2      | chr4_78804521-78804521_G_A    | 90R>H   | Substitution | Nonsynonymous coding | 12% |
| MM12T | MRPL10   | mitochondrial ribosomal protein L10       | CCDS11516.1     | chr17_45908830-45908830_C_A   | 16Q>H   | Substitution | Nonsynonymous coding | 10% |
| MM12T | MRPL16   | mitochondrial ribosomal protein L16       | CCDS7976.1      | chr11_59573827-59573827_C_T   | 250R>H  | Substitution | Nonsynonymous coding | 47% |
| MM12T | MRPL37   | mitochondrial ribosomal protein L37       | ENST00000329505 | chr1_54686467-54686467_C_T    | 397R>W  | Substitution | Nonsynonymous coding | 32% |
| MM12T | MRPS11   | mitochondrial ribosomal protein S11       | CCDS10342.1     | chr15_89011000-89011000_C_T   | 18P>S   | Substitution | Nonsynonymous coding | 35% |
| MM12T | MRPS27   | mitochondrial ribosomal protein S27       | CCDS4013.1      | chr5_71593475-71593475_G_T    | 69S>Y   | Substitution | Nonsynonymous coding | 20% |
| MM12T | MRPS30   | mitochondrial ribosomal protein S30       | CCDS3951.1      | chr5_44811248-44811248_C_T    | 247L>F  | Substitution | Nonsynonymous coding | 19% |
| MM12T | MRPS35   | mitochondrial ribosomal protein S35       | CCDS8714.1      | chr12_27888446-27888446_C_T   | 197R>X  | Substitution | Nonsense             | 34% |



|       |         |                                                                                          |                 |                               |         |              |                      |     |
|-------|---------|------------------------------------------------------------------------------------------|-----------------|-------------------------------|---------|--------------|----------------------|-----|
| MM12T | MRV1    | murine retrovirus integration site 1 homolog                                             | CCDS44538.1     | chr11_10631290-10631290_C_A   | 510R>M  | Substitution | Nonsynonymous coding | 47% |
| MM12T | MS4A12  | membrane-spanning 4-domains, subfamily A, member 12                                      | CCDS7988.1      | chr11_60271208-60271208_C_A   | 169S>Y  | Substitution | Nonsynonymous coding | 31% |
| MM12T | MS4A6A  | membrane-spanning 4-domains, subfamily A, member 6A                                      | CCDS7981.1      | chr11_59940505-59940505_G_T   | 216P>H  | Substitution | Nonsynonymous coding | 23% |
| MM12T | MS4A8B  | membrane-spanning 4-domains, subfamily A, member 8B                                      | CCDS7990.1      | chr11_60476210-60476210_C_A   | 164H>N  | Substitution | Nonsynonymous coding | 19% |
| MM12T | MS4A8B  | membrane-spanning 4-domains, subfamily A, member 8B                                      | CCDS7990.1      | chr11_60482610-60482610_G_A   | ISV+3>  | Substitution | Splice site donor    | 35% |
| MM12T | MSC     | musculin                                                                                 | CCDS43746.1     | chr8_72756124-72756124_G_A    | 97A>V   | Substitution | Nonsynonymous coding | 38% |
| MM12T | MSH3    | mutS homolog 3 (E. coli)                                                                 | CCDS34195.1     | chr5_79970915-79970915_A_     | NA      | Deletion     | Frameshift           | 36% |
| MM12T | MSH5    | mutS homolog 5 (E. coli)                                                                 | CCDS34409.1     | chr6_31721134-31721134_T_C    | 307V>A  | Substitution | Nonsynonymous coding | 46% |
| MM12T | MSH6    | mutS homolog 6 (E. coli)                                                                 | CCDS1836.1      | chr2_48026666-48026666_G_     | NA      | Deletion     | Frameshift           | 25% |
| MM12T | MSH6    | mutS homolog 6 (E. coli)                                                                 | CCDS1836.1      | chr2_48027453-48027453_G_A    | 777W>X  | Substitution | Nonsense             | 23% |
| MM12T | MSL2    | male-specific lethal 2 homolog (Drosophila)                                              | CCDS33861.1     | chr3_135870534-135870534_T_   | NA      | Deletion     | Frameshift           | 17% |
| MM12T | MSL3    | male-specific lethal 3 homolog (Drosophila)                                              | CCDS14147.1     | chrX_11777931-11777931_G_A    | 41G>E   | Substitution | Nonsynonymous coding | 15% |
| MM12T | MSLN    | mesothelin                                                                               | CCDS32356.1     | chr16_816801-816801_G_A       | 463S>N  | Substitution | Nonsynonymous coding | 27% |
| MM12T | MSLNL   | mesothelin-like                                                                          | CCDS42093.1     | chr16_830304-830304_G_A       | 233P>S  | Substitution | Nonsynonymous coding | 12% |
| MM12T | MSS51   | MSS51 mitochondrial translational activator                                              | CCDS31221.1     | chr10_75187501-75187501_C_T   | 83V>I   | Substitution | Nonsynonymous coding | 29% |
| MM12T | MST4    | Serine/threonine-protein kinase MST4 [Source:UniProtKB/Swiss-Prot;Acc:Q9P289]            | CCDS14631.1     | chrX_131203585-131203585_G_A  | 226R>K  | Substitution | Nonsynonymous coding | 43% |
| MM12T | MSX1    | msh homeobox 1                                                                           | CCDS33378.2     | chr4_4862093-4862093_C_T      | 156A>V  | Substitution | Nonsynonymous coding | 29% |
| MM12T | MT1G    | metallothionein 1G                                                                       | ENST00000245183 | chr16_56700749-56700749_C_T   | 77R>H   | Substitution | Nonsynonymous coding | 15% |
| MM12T | MTA1    | metastasis associated 1                                                                  | CCDS32169.1     | chr14_105931075-105931075_C_A | 470A>D  | Substitution | Nonsynonymous coding | 25% |
| MM12T | MTA2    | metastasis associated 1 family, member 2                                                 | CCDS8022.1      | chr11_62361478-62361478_G_A   | 626R>W  | Substitution | Nonsynonymous coding | 14% |
| MM12T | MTBP    | Mdm2, transformed 3T3 cell double minute 2, p53 binding protein (mouse) binding protein, | CCDS6333.1      | chr8_121514790-121514790_G_A  | 556W>X  | Substitution | Nonsense             | 11% |
| MM12T | MTDH    | metadherin                                                                               | CCDS6274.1      | chr8_98703366-98703366_G_A    | 333G>E  | Substitution | Nonsynonymous coding | 12% |
| MM12T | MTERFD1 | MTERF domain containing 1                                                                | CCDS6270.1      | chr8_97251893-97251893_A_     | NA      | Deletion     | Frameshift           | 16% |
| MM12T | MTHFD1  | methylenetetrahydrofolate dehydrogenase (NADP+ dependent) 1,                             | CCDS9763.1      | chr14_64921540-64921540_C_T   | 889R>C  | Substitution | Nonsynonymous coding | 30% |
| MM12T | MTHFD1L | methylenetetrahydrofolate dehydrogenase (NADP+ dependent) 1-like                         | CCDS5228.1      | chr6_151243387-151243387_G_T  | 344R>M  | Substitution | Nonsynonymous coding | 12% |
| MM12T | MTHFR   | methylenetetrahydrofolate reductase (NAD(P)H)                                            | CCDS137.1       | chr1_11862998-11862998_C_A    | 59W>L   | Substitution | Nonsynonymous coding | 30% |
| MM12T | MTMR4   | myotubularin related protein 4                                                           | CCDS11608.1     | chr17_56584615-56584615_C_T   | 244R>H  | Substitution | Nonsynonymous coding | 35% |
| MM12T | MTMR7   | myotubularin related protein 7                                                           | CCDS34851.1     | chr8_17170806-17170806_C_T    | 324A>T  | Substitution | Nonsynonymous coding | 22% |
| MM12T | MTMR8   | myotubularin related protein 8                                                           | CCDS14379.1     | chrX_63569893-63569893_C_T    | 176V>M  | Substitution | Nonsynonymous coding | 12% |
| MM12T | MTNR1B  | melatonin receptor 1B                                                                    | CCDS8290.1      | chr11_92703061-92703061_G_A   | 57G>D   | Substitution | Nonsynonymous coding | 22% |
| MM12T | MTO1    | mitochondrial translation optimization 1 homolog (S. cerevisiae)                         | CCDS47452.1     | chr6_74210304-74210304_C_T    | 682A>V  | Substitution | Nonsynonymous coding | 21% |
| MM12T | MTOR    | mechanistic target of rapamycin (serine/threonine kinase)                                | CCDS127.1       | chr1_11168260-11168260_G_T    | 2538L>I | Substitution | Nonsynonymous coding | 11% |

|       |       |                                                           |                 |                              |          |              |                      |     |
|-------|-------|-----------------------------------------------------------|-----------------|------------------------------|----------|--------------|----------------------|-----|
| MM12T | MTOR  | mechanistic target of rapamycin (serine/threonine kinase) | CCDS127.1       | chr1_11288849-11288849_G_A   | 969T>I   | Substitution | Nonsynonymous coding | 36% |
| MM12T | MTOR  | mechanistic target of rapamycin (serine/threonine kinase) | CCDS127.1       | chr1_11294225-11294225_C_T   | 769R>H   | Substitution | Nonsynonymous coding | 34% |
| MM12T | MTOR  | mechanistic target of rapamycin (serine/threonine kinase) | CCDS127.1       | chr1_11307714-11307714_C_T   | 398R>H   | Substitution | Nonsynonymous coding | 12% |
| MM12T | MTR   | 5-methyltetrahydrofolate-homocysteine methyltransferase   | CCDS1614.1      | chr1_237044081-237044081_C_T | 874P>L   | Substitution | Nonsynonymous coding | 14% |
| MM12T | MTRF1 | mitochondrial translational release factor 1              | CCDS9378.1      | chr13_41826834-41826834_G_A  | 215S>L   | Substitution | Nonsynonymous coding | 28% |
| MM12T | MTSS1 | metastasis suppressor 1                                   | CCDS6353.1      | chr8_125577954-125577954_G_A | 258T>M   | Substitution | Nonsynonymous coding | 29% |
| MM12T | MTUS2 | microtubule associated tumor suppressor candidate 2       | CCDS45022.1     | chr13_30075325-30075325_T_C  | 1307V>A  | Substitution | Nonsynonymous coding | 10% |
| MM12T | MUC1  | mucin 1, cell surface associated                          | CCDS1098.1      | chr1_155159936-155159936_C_T | 198A>T   | Substitution | Nonsynonymous coding | 13% |
| MM12T | MUC16 | mucin 16, cell surface associated                         | NM_024690       | chr19_9075824-9075824__T     | NA       | Insertion    | Frameshift           | 22% |
| MM12T | MUC16 | mucin 16, cell surface associated                         | NM_024690       | chr19_9046679-9046679_G_T    | 11651P>H | Substitution | Nonsynonymous coding | 26% |
| MM12T | MUC16 | mucin 16, cell surface associated                         | NM_024690       | chr19_9057766-9057766_T_G    | 9894T>P  | Substitution | Nonsynonymous coding | 30% |
| MM12T | MUC16 | mucin 16, cell surface associated                         | NM_024690       | chr19_9059020-9059020_C_A    | 9476D>Y  | Substitution | Nonsynonymous coding | 40% |
| MM12T | MUC16 | mucin 16, cell surface associated                         | NM_024690       | chr19_9068968-9068968_C_T    | 6160G>S  | Substitution | Nonsynonymous coding | 14% |
| MM12T | MUC16 | mucin 16, cell surface associated                         | NM_024690       | chr19_9083702-9083702_G_A    | 2705P>S  | Substitution | Nonsynonymous coding | 38% |
| MM12T | MUC16 | mucin 16, cell surface associated                         | NM_024690       | chr19_9088046-9088046_C_T    | 1257A>T  | Substitution | Nonsynonymous coding | 28% |
| MM12T | MUC16 | mucin 16, cell surface associated                         | NM_024690       | chr19_9088617-9088617_C_A    | 1066E>D  | Substitution | Nonsynonymous coding | 40% |
| MM12T | MUC19 | mucin 19, oligomeric                                      | ENST00000398702 | chr12_40912808-40912808_C_T  | 127A>V   | Substitution | Nonsynonymous coding | 33% |
| MM12T | MUC19 | mucin 19, oligomeric                                      | ENST00000440207 | chr12_40935432-40935432_G_T  | 153E>D   | Substitution | Nonsynonymous coding | 36% |
| MM12T | MUC19 | mucin 19, oligomeric                                      | ENST00000380816 | chr12_40941582-40941582_A_T  | 210D>V   | Substitution | Nonsynonymous coding | 26% |
| MM12T | MUC20 | mucin 20, cell surface associated                         | NM_152673       | chr3_195460039-195460039_G_A | 523A>T   | Substitution | Nonsynonymous coding | 28% |
| MM12T | MUC3A | mucin 3A, cell surface associated                         | ENST00000319509 | chr7_100551889-100551889_G_A | 214E>K   | Substitution | Nonsynonymous coding | 19% |
| MM12T | MUC4  | mucin 4, cell surface associated                          | CCDS3310.1      | chr3_195481222-195481222_C_T | 828G>R   | Substitution | Nonsynonymous coding | 41% |
| MM12T | MUC4  | mucin 4, cell surface associated                          | CCDS3310.1      | chr3_195493582-195493582_G_A | 288P>S   | Substitution | Nonsynonymous coding | 29% |
| MM12T | MUC4  | mucin 4, cell surface associated                          | NM_018406       | chr3_195517227-195517227_C_A | 408E>D   | Substitution | Nonsynonymous coding | 35% |
| MM12T | MUC5B | mucin 5B, oligomeric mucus/gel-forming                    | CCDS44515.1     | chr11_1253903-1253903_G_T    | 659E>D   | Substitution | Nonsynonymous coding | 16% |
| MM12T | MUC5B | mucin 5B, oligomeric mucus/gel-forming                    | CCDS44515.1     | chr11_1253992-1253992_G_A    | 689G>D   | Substitution | Nonsynonymous coding | 10% |
| MM12T | MUC5B | mucin 5B, oligomeric mucus/gel-forming                    | CCDS44515.1     | chr11_1275427-1275427_G_A    | 5111R>H  | Substitution | Nonsynonymous coding | 36% |
| MM12T | MUC6  | mucin 6, oligomeric mucus/gel-forming                     | CCDS44513.1     | chr11_1019329-1019329_G_A    | 1326R>W  | Substitution | Nonsynonymous coding | 32% |
| MM12T | MUC6  | mucin 6, oligomeric mucus/gel-forming                     | CCDS44513.1     | chr11_1026040-1026040_C_T    | 883R>H   | Substitution | Nonsynonymous coding | 23% |
| MM12T | MUC6  | mucin 6, oligomeric mucus/gel-forming                     | CCDS44513.1     | chr11_1021264-1021264_G_T    | 1180C>X  | Substitution | Nonsense             | 24% |
| MM12T | MUL1  | mitochondrial E3 ubiquitin protein ligase 1               | CCDS208.1       | chr1_20827670-20827670_A_G   | 191V>A   | Substitution | Nonsynonymous coding | 36% |
| MM12T | MVP   | major vault protein                                       | CCDS10656.1     | chr16_29853019-29853019_G_A  | 432D>N   | Substitution | Nonsynonymous coding | 23% |

|       |         |                                                            |                 |                               |         |              |                      |     |
|-------|---------|------------------------------------------------------------|-----------------|-------------------------------|---------|--------------|----------------------|-----|
| MM12T | MX2     | myxovirus (influenza virus) resistance 2 (mouse)           | CCDS13672.1     | chr21_42751962-42751962_C_T   | 154P>L  | Substitution | Nonsynonymous coding | 21% |
| MM12T | MX2     | myxovirus (influenza virus) resistance 2 (mouse)           | CCDS13672.1     | chr21_42780068-42780068_G_A   | 686A>T  | Substitution | Nonsynonymous coding | 11% |
| MM12T | MXRA5   | matrix-remodelling associated 5                            | CCDS14124.1     | chrX_3238487-3238487_G_A      | 1747R>W | Substitution | Nonsynonymous coding | 16% |
| MM12T | MXRA5   | matrix-remodelling associated 5                            | CCDS14124.1     | chrX_3242828-3242828_C_A      | 300E>X  | Substitution | Nonsense             | 36% |
| MM12T | MXRA8   | matrix-remodelling associated 8                            | CCDS24.1        | chr1_1289466-1289466_T_C      | 389E>G  | Substitution | Nonsynonymous coding | 31% |
| MM12T | MYBL2   | v-myb myeloblastosis viral oncogene homolog (avian)-like 2 | CCDS13322.1     | chr20_42343802-42343802_G_T   | 618S>I  | Substitution | Nonsynonymous coding | 27% |
| MM12T | MYBPC1  | myosin binding protein C, slow type                        | CCDS9083.1      | chr12_102067274-102067274_C_T | 895R>C  | Substitution | Nonsynonymous coding | 16% |
| MM12T | MYBPC2  | myosin binding protein C, fast type                        | CCDS46152.1     | chr19_50939104-50939104_G_A   | 61V>I   | Substitution | Nonsynonymous coding | 31% |
| MM12T | MYBPC3  | myosin binding protein C, cardiac                          | ENST00000399249 | chr11_47353710-47353710_G_T   | 1243P>T | Substitution | Nonsynonymous coding | 39% |
| MM12T | MYC     | v-myc myelocytomatosis viral oncogene homolog (avian)      | CCDS6359.2      | chr8_128753200-128753200_C_T  | 454A>V  | Substitution | Nonsynonymous coding | 28% |
| MM12T | MYCBP2  | MYC binding protein 2, E3 ubiquitin protein ligase         | CCDS31994.1     | chr13_77792087-77792087_C_T   | 944C>Y  | Substitution | Nonsynonymous coding | 14% |
| MM12T | MYCBPAP | MYCBP associated protein                                   | CCDS32680.2     | chr17_48594799-48594799_C_A   | 160P>H  | Substitution | Nonsynonymous coding | 39% |
| MM12T | MYF6    | myogenic factor 6 (herculin)                               | CCDS9019.1      | chr12_81101850-81101850_C_T   | 118R>W  | Substitution | Nonsynonymous coding | 35% |
| MM12T | MYH10   | myosin, heavy chain 10, non-muscle                         | CCDS11144.1     | chr17_8402670-8402670_G_A     | 1259A>V | Substitution | Nonsynonymous coding | 34% |
| MM12T | MYH11   | myosin, heavy chain 11, smooth muscle                      | CCDS45423.1     | chr16_15811079-15811079_C_T   | 1815V>I | Substitution | Nonsynonymous coding | 27% |
| MM12T | MYH13   | myosin, heavy chain 13, skeletal muscle                    | CCDS45613.1     | chr17_10210266-10210266_G_A   | 1762A>V | Substitution | Nonsynonymous coding | 41% |
| MM12T | MYH13   | myosin, heavy chain 13, skeletal muscle                    | CCDS45613.1     | chr17_10216024-10216024_G_A   | 1411A>V | Substitution | Nonsynonymous coding | 11% |
| MM12T | MYH13   | myosin, heavy chain 13, skeletal muscle                    | CCDS45613.1     | chr17_10216055-10216055_G_A   | 1401L>F | Substitution | Nonsynonymous coding | 24% |
| MM12T | MYH13   | myosin, heavy chain 13, skeletal muscle                    | CCDS45613.1     | chr17_10216675-10216675_G_A   | ISV-4>  | Substitution | Splice site acceptor | 12% |
| MM12T | MYH15   | myosin, heavy chain 15                                     | CCDS43127.1     | chr3_108189052-108189052_C_T  | 484S>N  | Substitution | Nonsynonymous coding | 44% |
| MM12T | MYH2    | myosin, heavy chain 2, skeletal muscle, adult              | CCDS11156.1     | chr17_10429087-10429087_C_T   | 1432E>K | Substitution | Nonsynonymous coding | 14% |
| MM12T | MYH2    | myosin, heavy chain 2, skeletal muscle, adult              | CCDS11156.1     | chr17_10436717-10436717_G_T   | 776L>M  | Substitution | Nonsynonymous coding | 22% |
| MM12T | MYH3    | myosin, heavy chain 3, skeletal muscle, embryonic          | CCDS11157.1     | chr17_10544635-10544635_G_A   | 672R>C  | Substitution | Nonsynonymous coding | 25% |
| MM12T | MYH3    | myosin, heavy chain 3, skeletal muscle, embryonic          | CCDS11157.1     | chr17_10549143-10549143_C_T   | 341G>D  | Substitution | Nonsynonymous coding | 10% |
| MM12T | MYH4    | myosin, heavy chain 4, skeletal muscle                     | CCDS11154.1     | chr17_10354116-10354116_C_T   | 1321R>K | Substitution | Nonsynonymous coding | 17% |
| MM12T | MYH4    | myosin, heavy chain 4, skeletal muscle                     | CCDS11154.1     | chr17_10368893-10368893_A_T   | 124V>D  | Substitution | Nonsynonymous coding | 28% |
| MM12T | MYH6    | myosin, heavy chain 6, cardiac muscle, alpha               | CCDS9600.1      | chr14_23852502-23852502_G_A   | 1865R>W | Substitution | Nonsynonymous coding | 31% |
| MM12T | MYH6    | myosin, heavy chain 6, cardiac muscle, alpha               | CCDS9600.1      | chr14_23858909-23858909_G_A   | 1251S>F | Substitution | Nonsynonymous coding | 10% |
| MM12T | MYH6    | myosin, heavy chain 6, cardiac muscle, alpha               | CCDS9600.1      | chr14_23866769-23866769_C_T   | 649V>M  | Substitution | Nonsynonymous coding | 11% |
| MM12T | MYH6    | myosin, heavy chain 6, cardiac muscle, alpha               | CCDS9600.1      | chr14_23874479-23874479_G_A   | 152P>L  | Substitution | Nonsynonymous coding | 36% |
| MM12T | MYH7B   | myosin, heavy chain 7B, cardiac muscle, beta               | CCDS42869.1     | chr20_33588167-33588167_C_T   | 1660A>V | Substitution | Nonsynonymous coding | 10% |
| MM12T | MYH8    | myosin, heavy chain 8, skeletal muscle, perinatal          | CCDS11153.1     | chr17_10293864-10293864_C_A   | 1907E>D | Substitution | Nonsynonymous coding | 17% |

|       |        |                                                   |                 |                               |         |              |                      |     |
|-------|--------|---------------------------------------------------|-----------------|-------------------------------|---------|--------------|----------------------|-----|
| MM12T | MYH8   | myosin, heavy chain 8, skeletal muscle, perinatal | CCDS11153.1     | chr17_10304100-10304100_G_A   | ISV-4>  | Substitution | Splice site acceptor | 28% |
| MM12T | MYH9   | myosin, heavy chain 9, non-muscle                 | CCDS13927.1     | chr22_36684456-36684456_G_A   | 1592R>W | Substitution | Nonsynonymous coding | 12% |
| MM12T | MYH9   | myosin, heavy chain 9, non-muscle                 | CCDS13927.1     | chr22_36696246-36696246_G_C   | 968T>S  | Substitution | Nonsynonymous coding | 10% |
| MM12T | MYH9   | myosin, heavy chain 9, non-muscle                 | CCDS13927.1     | chr22_36694965-36694965_C_A   | 1034E>X | Substitution | Nonsense             | 18% |
| MM12T | MYLK   | myosin light chain kinase                         | CCDS46896.1     | chr3_123385149-123385149_G_A  | 1250R>C | Substitution | Nonsynonymous coding | 29% |
| MM12T | MYO10  | myosin X                                          | NM_012334       | chr5_16680187-16680187_G_A    | 1471R>C | Substitution | Nonsynonymous coding | 12% |
| MM12T | MYO15A | myosin XVA                                        | CCDS42271.1     | chr17_18045430-18045430_G_T   | 1896S>I | Substitution | Nonsynonymous coding | 38% |
| MM12T | MYO15A | myosin XVA                                        | CCDS42271.1     | chr17_18053762-18053762_C_T   | 2411A>V | Substitution | Nonsynonymous coding | 34% |
| MM12T | MYO15B | myosin XVB pseudogene                             | ENST00000293201 | chr17_73612658-73612658_C_T   | 1040A>V | Substitution | Nonsynonymous coding | 33% |
| MM12T | MYO16  | myosin XVI                                        | CCDS32008.1     | chr13_109438038-109438038_C_A | 166A>D  | Substitution | Nonsynonymous coding | 36% |
| MM12T | MYO18A | myosin XVIII A                                    | CCDS45642.1     | chr17_27448135-27448135_C_T   | 489R>H  | Substitution | Nonsynonymous coding | 21% |
| MM12T | MYO18A | myosin XVIII A                                    | CCDS45642.1     | chr17_27425843-27425843_C_T   | ISV+1>  | Substitution | Splice site donor    | 18% |
| MM12T | MYO18B | myosin XVIII B                                    | NM_032608       | chr22_26164082-26164082_A_G   | 67I>V   | Substitution | Nonsynonymous coding | 27% |
| MM12T | MYO18B | myosin XVIII B                                    | NM_032608       | chr22_26165324-26165324_C_T   | 481R>W  | Substitution | Nonsynonymous coding | 26% |
| MM12T | MYO1B  | myosin IB                                         | CCDS46477.1     | chr2_192160877-192160877_G_A  | 59R>Q   | Substitution | Nonsynonymous coding | 12% |
| MM12T | MYO1B  | myosin IB                                         | CCDS46477.1     | chr2_192206238-192206238_C_T  | 133A>V  | Substitution | Nonsynonymous coding | 15% |
| MM12T | MYO1C  | myosin IC                                         | CCDS42226.1     | chr17_1373566-1373566_T_C     | 810D>G  | Substitution | Nonsynonymous coding | 15% |
| MM12T | MYO1D  | myosin ID                                         | CCDS32615.1     | chr17_31039035-31039035_G_T   | 698L>I  | Substitution | Nonsynonymous coding | 49% |
| MM12T | MYO3A  | myosin III A                                      | CCDS7148.1      | chr10_26432398-26432398_G_A   | 762V>M  | Substitution | Nonsynonymous coding | 26% |
| MM12T | MYO3B  | myosin III B                                      | CCDS42773.1     | chr2_171323173-171323173_G_A  | 989R>H  | Substitution | Nonsynonymous coding | 28% |
| MM12T | MYO5A  | myosin VA (heavy chain 12, myosin)                | CCDS42037.1     | chr15_52720685-52720685_G_A   | 74L>F   | Substitution | Nonsynonymous coding | 27% |
| MM12T | MYO5B  | myosin VB                                         | CCDS42436.1     | chr18_47364169-47364169_G_A   | 1619S>F | Substitution | Nonsynonymous coding | 50% |
| MM12T | MYO5B  | myosin VB                                         | CCDS42436.1     | chr18_47367799-47367799_G_A   | 1546T>M | Substitution | Nonsynonymous coding | 25% |
| MM12T | MYO5B  | myosin VB                                         | CCDS42436.1     | chr18_47402163-47402163_G_A   | 1144T>M | Substitution | Nonsynonymous coding | 31% |
| MM12T | MYO5B  | myosin VB                                         | CCDS42436.1     | chr18_47405401-47405401_G_A   | 1064R>X | Substitution | Nonsense             | 28% |
| MM12T | MYO6   | myosin VI                                         | CCDS34487.1     | chr6_76599858-76599858_A      | NA      | Insertion    | Frameshift           | 10% |
| MM12T | MYO6   | myosin VI                                         | CCDS34487.1     | chr6_76550344-76550344_G_A    | 199R>H  | Substitution | Nonsynonymous coding | 19% |
| MM12T | MYO6   | myosin VI                                         | CCDS34487.1     | chr6_76570770-76570770_G_T    | 502G>C  | Substitution | Nonsynonymous coding | 24% |
| MM12T | MYO7A  | myosin VII A                                      | NM_000260       | chr11_76890850-76890850_G_A   | 813A>T  | Substitution | Nonsynonymous coding | 16% |
| MM12T | MYO7A  | myosin VII A                                      | NM_000260       | chr11_76909653-76909653_G_A   | 1519V>M | Substitution | Nonsynonymous coding | 50% |
| MM12T | MYO7B  | myosin VII B                                      | CCDS46405.1     | chr2_128363489-128363489_A_G  | 804R>G  | Substitution | Nonsynonymous coding | 22% |
| MM12T | MYO7B  | myosin VII B                                      | CCDS46405.1     | chr2_128366343-128366343_C_T  | 902R>C  | Substitution | Nonsynonymous coding | 12% |

|       |          |                                                       |                 |                               |         |              |                      |     |
|-------|----------|-------------------------------------------------------|-----------------|-------------------------------|---------|--------------|----------------------|-----|
| MM12T | MYO7B    | myosin VIIB                                           | CCDS46405.1     | chr2_128381878-128381878_G_A  | 1318E>K | Substitution | Nonsynonymous coding | 25% |
| MM12T | MYO9A    | myosin IXA                                            | CCDS10239.1     | chr15_72180441-72180441_G_A   | 1720S>L | Substitution | Nonsynonymous coding | 32% |
| MM12T | MYO9B    | myosin IXB                                            | CCDS46010.1     | chr19_17305733-17305733_T_C   | 1166I>T | Substitution | Nonsynonymous coding | 42% |
| MM12T | MYOCD    | myocardin                                             | CCDS11163.1     | chr17_12656041-12656041_C_    | NA      | Deletion     | Frameshift           | 28% |
| MM12T | MYOCD    | myocardin                                             | CCDS11163.1     | chr17_12620711-12620711_G_A   | 76D>N   | Substitution | Nonsynonymous coding | 26% |
| MM12T | MYOD1    | myogenic differentiation 1                            | CCDS7826.1      | chr11_17742823-17742823_C_T   | 244A>V  | Substitution | Nonsynonymous coding | 14% |
| MM12T | MYOD1    | myogenic differentiation 1                            | CCDS7826.1      | chr11_17742873-17742873_A_G   | 261T>A  | Substitution | Nonsynonymous coding | 22% |
| MM12T | MYOM1    | myomesin 1                                            | CCDS45824.1     | chr18_3126723-3126723_C_G     | 989K>N  | Substitution | Nonsynonymous coding | 13% |
| MM12T | MYOM1    | myomesin 1                                            | CCDS45824.1     | chr18_3129458-3129458_C_T     | 856A>T  | Substitution | Nonsynonymous coding | 33% |
| MM12T | MYRF     | myelin regulatory factor                              | CCDS44622.1     | chr11_61533626-61533626_C_A   | 111P>T  | Substitution | Nonsynonymous coding | 33% |
| MM12T | MYRF     | myelin regulatory factor                              | CCDS44622.1     | chr11_61544914-61544914_G_A   | 590R>H  | Substitution | Nonsynonymous coding | 11% |
| MM12T | MYRF     | myelin regulatory factor                              | CCDS44622.1     | chr11_61551072-61551072_G_T   | 1040R>M | Substitution | Nonsynonymous coding | 32% |
| MM12T | MYRF     | myelin regulatory factor                              | CCDS44622.1     | chr11_61550969-61550969_G_A   | ISV-1>  | Substitution | Splice site acceptor | 15% |
| MM12T | MYRFL    | myelin regulatory factor-like                         | ENST00000299350 | chr12_70329946-70329946_G_A   | 22R>H   | Substitution | Nonsynonymous coding | 36% |
| MM12T | MYRFL    | myelin regulatory factor-like                         | ENST00000299350 | chr12_70330257-70330257_C_T   | 55T>I   | Substitution | Nonsynonymous coding | 26% |
| MM12T | MYSM1    | Myb-like, SWIRM and MPN domains 1                     | CCDS41343.1     | chr1_59147985-59147985_T_C    | 244D>G  | Substitution | Nonsynonymous coding | 49% |
| MM12T | MYT1L    | myelin transcription factor 1-like                    | CCDS46222.1     | chr2_1926459-1926459_A_G      | 361V>A  | Substitution | Nonsynonymous coding | 12% |
| MM12T | N4BP2    | NEDD4 binding protein 2                               | CCDS3457.1      | chr4_40127885-40127885_A_G    | 1488T>A | Substitution | Nonsynonymous coding | 12% |
| MM12T | N4BP2L2  | NEDD4 binding protein 2-like 2                        | CCDS45024.1     | chr13_33017998-33017998_T     | NA      | Insertion    | Frameshift           | 15% |
| MM12T | NAA25    | N(alpha)-acetyltransferase 25, NatB auxiliary subunit | CCDS9159.1      | chr12_112480966-112480966_G_A | 767S>F  | Substitution | Nonsynonymous coding | 12% |
| MM12T | NAA35    | N(alpha)-acetyltransferase 35, NatC auxiliary subunit | CCDS6673.1      | chr9_88632448-88632448_G_A    | 581A>T  | Substitution | Nonsynonymous coding | 13% |
| MM12T | NAAA     | N-acylethanolamine acid amidase                       | CCDS43239.1     | chr4_76842239-76842239_C_T    | 235G>D  | Substitution | Nonsynonymous coding | 12% |
| MM12T | NAAA     | N-acylethanolamine acid amidase                       | CCDS43239.1     | chr4_76861193-76861193_G_A    | 111A>V  | Substitution | Nonsynonymous coding | 23% |
| MM12T | NAALADL1 | N-acetylated alpha-linked acidic dipeptidase-like 1   | CCDS31604.1     | chr11_64813726-64813726_C_T   | 597R>H  | Substitution | Nonsynonymous coding | 13% |
| MM12T | NABP1    | nucleic acid binding protein 1                        | ENST00000307849 | chr2_192547240-192547240_G_A  | 109A>T  | Substitution | Nonsynonymous coding | 25% |
| MM12T | NADSYN1  | NAD synthetase 1                                      | CCDS8201.1      | chr11_71169583-71169583_G_A   | 86V>M   | Substitution | Nonsynonymous coding | 29% |
| MM12T | NAT16    | N-acetyltransferase 16 (GCN5-related, putative)       | CCDS5713.1      | chr7_100815493-100815493_C_T  | 326G>D  | Substitution | Nonsynonymous coding | 12% |
| MM12T | NAV2     | neuron navigator 2                                    | CCDS7851.2      | chr11_20066528-20066528_G_A   | 1072A>T | Substitution | Nonsynonymous coding | 22% |
| MM12T | NAV2     | neuron navigator 2                                    | CCDS7851.2      | chr11_20122600-20122600_G_A   | 2103S>N | Substitution | Nonsynonymous coding | 22% |
| MM12T | NAV3     | neuron navigator 3                                    | CCDS41815.1     | chr12_78444657-78444657_C_T   | 749P>L  | Substitution | Nonsynonymous coding | 31% |
| MM12T | NAV3     | neuron navigator 3                                    | CCDS41815.1     | chr12_78452792-78452792_G_A   | 845G>R  | Substitution | Nonsynonymous coding | 36% |
| MM12T | NBAS     | neuroblastoma amplified sequence                      | CCDS1685.1      | chr2_15432713-15432713_G_A    | 1659R>W | Substitution | Nonsynonymous coding | 24% |

|       |         |                                          |                 |                               |         |              |                      |     |
|-------|---------|------------------------------------------|-----------------|-------------------------------|---------|--------------|----------------------|-----|
| MM12T | NBAS    | neuroblastoma amplified sequence         | CCDS1685.1      | chr2_15607532-15607532_C_A    | ISV-1>  | Substitution | Splice site acceptor | 21% |
| MM12T | NBAS    | neuroblastoma amplified sequence         | CCDS1685.1      | chr2_15608502-15608502_C_T    | ISV+4>  | Substitution | Splice site donor    | 11% |
| MM12T | NBEA    | neurobeachin                             | CCDS45026.1     | chr13_35517203-35517203_G_T   | 82Q>H   | Substitution | Nonsynonymous coding | 35% |
| MM12T | NBEAL1  | neurobeachin-like 1                      | CCDS46495.1     | chr2_204016238-204016238_G_A  | 1809R>H | Substitution | Nonsynonymous coding | 17% |
| MM12T | NBEAL2  | neurobeachin-like 2                      | CCDS46817.1     | chr3_47041428-47041428_G_A    | 1280R>Q | Substitution | Nonsynonymous coding | 31% |
| MM12T | NBEAL2  | neurobeachin-like 2                      | CCDS46817.1     | chr3_47041772-47041772_C_T    | 1395P>S | Substitution | Nonsynonymous coding | 16% |
| MM12T | NBEAL2  | neurobeachin-like 2                      | CCDS46817.1     | chr3_47043417-47043417_C_T    | 1597A>V | Substitution | Nonsynonymous coding | 28% |
| MM12T | NBEAL2  | neurobeachin-like 2                      | CCDS46817.1     | chr3_47049921-47049921_C_A    | 2623P>H | Substitution | Nonsynonymous coding | 30% |
| MM12T | NCAM1   | neural cell adhesion molecule 1          | ENST00000401611 | chr11_113105833-113105833_G_A | 463G>D  | Substitution | Nonsynonymous coding | 23% |
| MM12T | NCAPD2  | non-SMC condensin I complex, subunit D2  | CCDS5848.1      | chr12_6639102-6639102_G_A     | 1272R>H | Substitution | Nonsynonymous coding | 37% |
| MM12T | NCAPD3  | non-SMC condensin II complex, subunit D3 | CCDS31723.1     | chr11_134090543-134090543_C_A | 48E>X   | Substitution | Nonsense             | 29% |
| MM12T | NCAPH2  | non-SMC condensin II complex, subunit H2 | CCDS14094.2     | chr22_50960636-50960636_G_A   | 397V>M  | Substitution | Nonsynonymous coding | 38% |
| MM12T | NCDN    | neurochondrin                            | CCDS392.1       | chr1_36030899-36030899_G_A    | 609A>T  | Substitution | Nonsynonymous coding | 29% |
| MM12T | NCKAP5  | NCK-associated protein 5                 | CCDS46418.1     | chr2_133540381-133540381_G_A  | 1335L>F | Substitution | Nonsynonymous coding | 32% |
| MM12T | NCKAP5L | NCK-associated protein 5-like            | CCDS41781.2     | chr12_50185794-50185794_C_T   | 1278R>H | Substitution | Nonsynonymous coding | 10% |
| MM12T | NCKIPSD | NCK interacting protein with SH3 domain  | CCDS2776.1      | chr3_48720448-48720448_G      | NA      | Insertion    | Splice site acceptor | 27% |
| MM12T | NCLN    | nicalin                                  | CCDS32869.1     | chr19_3204066-3204066_G_T     | 318S>I  | Substitution | Nonsynonymous coding | 36% |
| MM12T | NCOA2   | nuclear receptor coactivator 2           | CCDS47872.1     | chr8_71036314-71036314_C_T    | 1366M>I | Substitution | Nonsynonymous coding | 24% |
| MM12T | NCOA2   | nuclear receptor coactivator 2           | CCDS47872.1     | chr8_71037104-71037104_A_     | NA      | Deletion     | Splice site acceptor | 13% |
| MM12T | NCOA6   | nuclear receptor coactivator 6           | CCDS13241.1     | chr20_33338326-33338326_A_    | NA      | Deletion     | Splice site acceptor | 11% |
| MM12T | NCOA6   | nuclear receptor coactivator 6           | CCDS13241.1     | chr20_33338326-33338326__A    | NA      | Insertion    | Splice site acceptor | 13% |
| MM12T | NCOA7   | nuclear receptor coactivator 7           | CCDS5132.1      | chr6_126210338-126210338_A_G  | 380T>A  | Substitution | Nonsynonymous coding | 46% |
| MM12T | NCOA7   | nuclear receptor coactivator 7           | CCDS5132.1      | chr6_126210339-126210339_C_T  | 380T>I  | Substitution | Nonsynonymous coding | 17% |
| MM12T | NCOR1   | nuclear receptor corepressor 1           | CCDS11175.1     | chr17_15965542-15965542_C_T   | 1755R>H | Substitution | Nonsynonymous coding | 16% |
| MM12T | NCOR1   | nuclear receptor corepressor 1           | CCDS11175.1     | chr17_16004572-16004572_C_A   | 894E>D  | Substitution | Nonsynonymous coding | 31% |
| MM12T | NCOR1   | nuclear receptor corepressor 1           | CCDS11175.1     | chr17_16024565-16024565_C_A   | 551K>N  | Substitution | Nonsynonymous coding | 40% |
| MM12T | NCOR1   | nuclear receptor corepressor 1           | CCDS11175.1     | chr17_16021201-16021201_C_T   | ISV+1>  | Substitution | Splice site donor    | 13% |
| MM12T | NCOR2   | nuclear receptor corepressor 2           | CCDS41858.1     | chr12_124846684-124846684_C_T | 1029A>T | Substitution | Nonsynonymous coding | 13% |
| MM12T | NCSTN   | nicastatin                               | CCDS1203.1      | chr1_160322989-160322989_G_T  | 381D>Y  | Substitution | Nonsynonymous coding | 25% |
| MM12T | NDFIP2  | Nedd4 family interacting protein 2       | CCDS31998.1     | chr13_80122529-80122529_G_T   | 303G>C  | Substitution | Nonsynonymous coding | 29% |
| MM12T | NDRG1   | N-myc downstream regulated 1             | CCDS34945.1     | chr8_134296540-134296540_C_T  | 5M>I    | Substitution | Nonsynonymous coding | 27% |
| MM12T | NDRG3   | NDRG family member 3                     | CCDS13285.1     | chr20_35293702-35293702_C_T   | 232R>H  | Substitution | Nonsynonymous coding | 33% |

|       |         |                                                                                       |                 |                               |         |              |                      |     |
|-------|---------|---------------------------------------------------------------------------------------|-----------------|-------------------------------|---------|--------------|----------------------|-----|
| MM12T | NDUFA10 | NADH dehydrogenase (ubiquinone) 1 alpha subcomplex, 10, 42kDa                         | CCDS2531.1      | chr2_240960685-240960685_C_T  | 130R>H  | Substitution | Nonsynonymous coding | 11% |
| MM12T | NDUFAF1 | NADH dehydrogenase (ubiquinone) complex I, assembly factor 1                          | CCDS10075.1     | chr15_41679647-41679647_T_C   | 327K>E  | Substitution | Nonsynonymous coding | 43% |
| MM12T | NDUFS7  | NADH dehydrogenase (ubiquinone) Fe-S protein 7, 20kDa (NADH-coenzyme Q                | ENST00000382445 | chr19_1389545-1389545_C_T     | 279A>V  | Substitution | Nonsynonymous coding | 24% |
| MM12T | NEB     | nebulin                                                                               | CCDS46424.1     | chr2_152350311-152350311_C_T  | 6361R>H | Substitution | Nonsynonymous coding | 19% |
| MM12T | NEB     | nebulin                                                                               | CCDS46424.1     | chr2_152374846-152374846_C_T  | 5895E>K | Substitution | Nonsynonymous coding | 11% |
| MM12T | NEB     | nebulin                                                                               | CCDS46424.1     | chr2_152382501-152382501_C_T  | 5677V>I | Substitution | Nonsynonymous coding | 10% |
| MM12T | NEB     | nebulin                                                                               | CCDS46424.1     | chr2_152408350-152408350_G_A  | 4915H>Y | Substitution | Nonsynonymous coding | 31% |
| MM12T | NEB     | nebulin                                                                               | CCDS46424.1     | chr2_152424934-152424934_A_   | NA      | Deletion     | Splice site acceptor | 34% |
| MM12T | NEB     | nebulin                                                                               | CCDS46424.1     | chr2_152402516-152402516_A    | NA      | Insertion    | Splice site acceptor | 13% |
| MM12T | NEDD4L  | neural precursor cell expressed, developmentally down-regulated 4-like, E3            | CCDS45872.1     | chr18_56035063-56035063_G_A   | 717A>T  | Substitution | Nonsynonymous coding | 28% |
| MM12T | NEDD8   | neural precursor cell expressed, developmentally down-regulated 8                     | CCDS9621.1      | chr14_24701471-24701471_C_T   | 1M>I    | Substitution | Nonsynonymous coding | 32% |
| MM12T | NEFL    | neurofilament, light polypeptide                                                      | ENST00000221169 | chr8_24813348-24813348_C_T    | 228E>K  | Substitution | Nonsynonymous coding | 34% |
| MM12T | NEFM    | neurofilament, medium polypeptide                                                     | CCDS6046.1      | chr8_24771602-24771602_C_T    | 99S>F   | Substitution | Nonsynonymous coding | 33% |
| MM12T | NEIL2   | nei endonuclease VIII-like 2 (E. coli)                                                | CCDS5984.1      | chr8_11637332-11637332_G_A    | 122A>T  | Substitution | Nonsynonymous coding | 16% |
| MM12T | NEK1    | NIMA-related kinase 1                                                                 | CCDS47162.1     | chr4_170429410-170429410_G_A  | 580R>C  | Substitution | Nonsynonymous coding | 19% |
| MM12T | NEK2    | NIMA-related kinase 2                                                                 | CCDS1500.1      | chr1_211843735-211843735_G_T  | 218A>D  | Substitution | Nonsynonymous coding | 33% |
| MM12T | NELL1   | NEL-like 1 (chicken)                                                                  | CCDS7855.1      | chr11_20950009-20950009_C_A   | 327C>X  | Substitution | Nonsense             | 22% |
| MM12T | NEO1    | neogenin 1                                                                            | CCDS10247.1     | chr15_73581554-73581554_G_A   | 1239M>I | Substitution | Nonsynonymous coding | 27% |
| MM12T | NES     | nestin                                                                                | CCDS1151.1      | chr1_156646294-156646294_G_A  | 255R>W  | Substitution | Nonsynonymous coding | 13% |
| MM12T | NETO2   | neuropilin (NRP) and tolloid (TLL)-like 2                                             | CCDS10727.1     | chr16_47117434-47117434_G_A   | 426R>W  | Substitution | Nonsynonymous coding | 14% |
| MM12T | NEURL   | neuralized homolog (Drosophila)                                                       | CCDS7551.1      | chr10_105344640-105344640_C_T | 333R>C  | Substitution | Nonsynonymous coding | 16% |
| MM12T | NEURL4  | neuralized homolog 4 (Drosophila)                                                     | CCDS42251.1     | chr17_7226290-7226290_C_T     | 857C>Y  | Substitution | Nonsynonymous coding | 35% |
| MM12T | NF1     | neurofibromin 1                                                                       | CCDS42292.1     | chr17_29508792-29508792_C_T   | 240T>I  | Substitution | Nonsynonymous coding | 17% |
| MM12T | NF1     | neurofibromin 1                                                                       | CCDS42292.1     | chr17_29661966-29661966_C_A   | 1975L>I | Substitution | Nonsynonymous coding | 34% |
| MM12T | NF1     | neurofibromin 1                                                                       | CCDS42292.1     | chr17_29533315-29533315_C_T   | 440R>X  | Substitution | Nonsense             | 35% |
| MM12T | NF1     | neurofibromin 1                                                                       | CCDS42292.1     | chr17_29533378-29533378_C_T   | 461R>X  | Substitution | Nonsense             | 23% |
| MM12T | NFAT5   | nuclear factor of activated T-cells 5, tonicity-responsive                            | CCDS45518.1     | chr16_69729182-69729182_G_A   | 1520A>T | Substitution | Nonsynonymous coding | 14% |
| MM12T | NFATC1  | nuclear factor of activated T-cells, cytoplasmic, calcineurin-dependent 1             | CCDS32850.1     | chr18_77246904-77246904_C_T   | 904P>S  | Substitution | Nonsynonymous coding | 10% |
| MM12T | NFATC4  | nuclear factor of activated T-cells, cytoplasmic, calcineurin-dependent 4             | CCDS45089.1     | chr14_24839029-24839029_C_T   | 205S>F  | Substitution | Nonsynonymous coding | 12% |
| MM12T | NFIL3   | nuclear factor, interleukin 3 regulated                                               | CCDS6690.1      | chr9_94172221-94172221_G_A    | 266R>X  | Substitution | Nonsense             | 36% |
| MM12T | NFKB1   | nuclear factor of kappa light polypeptide gene enhancer in B-cells 1                  | CCDS3657.1      | chr4_103488171-103488171_G_A  | 96V>I   | Substitution | Nonsynonymous coding | 25% |
| MM12T | NFKBIE  | nuclear factor of kappa light polypeptide gene enhancer in B-cells inhibitor, epsilon | CCDS34463.1     | chr6_44227847-44227847_C_T    | 457C>Y  | Substitution | Nonsynonymous coding | 17% |

|       |              |                                                                                       |                 |                               |         |              |                      |     |
|-------|--------------|---------------------------------------------------------------------------------------|-----------------|-------------------------------|---------|--------------|----------------------|-----|
| MM12T | NFKBIE       | nuclear factor of kappa light polypeptide gene enhancer in B-cells inhibitor, epsilon | CCDS34463.1     | chr6_44229509-44229509_G_C    | 321A>G  | Substitution | Nonsynonymous coding | 41% |
| MM12T | NFKBIZ       | nuclear factor of kappa light polypeptide gene enhancer in B-cells inhibitor, zeta    | CCDS2946.1      | chr3_101570979-101570979_G_A  | 114V>I  | Substitution | Nonsynonymous coding | 32% |
| MM12T | NFX1         | nuclear transcription factor, X-box binding 1                                         | CCDS6538.1      | chr9_33342751-33342751_A_G    | 708E>G  | Substitution | Nonsynonymous coding | 24% |
| MM12T | NGEF         | neuronal guanine nucleotide exchange factor                                           | CCDS2500.1      | chr2_233756106-233756106_G_A  | 412P>S  | Substitution | Nonsynonymous coding | 40% |
| MM12T | NGFR         | nerve growth factor receptor                                                          | CCDS11549.1     | chr17_47583813-47583813_C_T   | 121R>C  | Substitution | Nonsynonymous coding | 23% |
| MM12T | NGLY1        | N-glycanase 1                                                                         | CCDS33719.1     | chr3_25778830-25778830_T_C    | 333Y>C  | Substitution | Nonsynonymous coding | 33% |
| MM12T | NHS          | Nance-Horan syndrome (congenital cataracts and dental anomalies)                      | CCDS14181.1     | chrX_17744495-17744495_G_A    | 736A>T  | Substitution | Nonsynonymous coding | 31% |
| MM12T | NHS          | Nance-Horan syndrome (congenital cataracts and dental anomalies)                      | CCDS14181.1     | chrX_17744995-17744995_G_T    | 902K>N  | Substitution | Nonsynonymous coding | 33% |
| MM12T | NIN          | ninein (GSK3B interacting protein)                                                    | CCDS41952.1     | chr14_51190213-51190213_G_A   | 2124P>S | Substitution | Nonsynonymous coding | 31% |
| MM12T | NINL         | ninein-like                                                                           | CCDS33452.1     | chr20_25472100-25472100_G_A   | 458R>X  | Substitution | Nonsense             | 33% |
| MM12T | NIPAL3       | NIPA-like domain containing 3                                                         | ENST00000437117 | chr1_24784307-24784307_C_A    | 64S>Y   | Substitution | Nonsynonymous coding | 39% |
| MM12T | NIPBL        | Nipped-B homolog (Drosophila)                                                         | CCDS3920.1      | chr5_37064899-37064899_A_     | NA      | Deletion     | Frameshift           | 24% |
| MM12T | NIPSNAP3B    | nipsnap homolog 3B (C. elegans)                                                       | CCDS6761.1      | chr9_107531205-107531205_A_C  | 111E>D  | Substitution | Nonsynonymous coding | 10% |
| MM12T | NKAP         | NFKB activating protein                                                               | CCDS14592.1     | chrX_119059350-119059350_G_A  | 361R>X  | Substitution | Nonsense             | 29% |
| MM12T | NKIRAS2      | NFKB inhibitor interacting Ras-like 2                                                 | CCDS11415.1     | chr17_40175859-40175859_C_A   | 175S>Y  | Substitution | Nonsynonymous coding | 25% |
| MM12T | NKPD1        | NTPase, KAP family P-loop domain containing 1                                         | CCDS42577.1     | chr19_45656251-45656251_C_T   | 260D>N  | Substitution | Nonsynonymous coding | 13% |
| MM12T | NKPD1        | NTPase, KAP family P-loop domain containing 1                                         | CCDS42577.1     | chr19_45656781-45656781_C_T   | 83R>H   | Substitution | Nonsynonymous coding | 13% |
| MM12T | NKPD1        | NTPase, KAP family P-loop domain containing 1                                         | CCDS42577.1     | chr19_45656883-45656883_C_T   | 49R>H   | Substitution | Nonsynonymous coding | 21% |
| MM12T | NKRF         | NFKB repressing factor                                                                | CCDS35375.1     | chrX_118723587-118723587_T_A  | 601I>F  | Substitution | Nonsynonymous coding | 27% |
| MM12T | NKRF         | NFKB repressing factor                                                                | CCDS35375.1     | chrX_118724850-118724850_T_C  | 180T>A  | Substitution | Nonsynonymous coding | 44% |
| MM12T | NKRF         | NFKB repressing factor                                                                | CCDS35375.1     | chrX_118725105-118725105_C_A  | 95D>Y   | Substitution | Nonsynonymous coding | 33% |
| MM12T | NLGN2        | neuroligin 2                                                                          | CCDS11103.1     | chr17_7312019-7312019_C_T     | 149P>S  | Substitution | Nonsynonymous coding | 24% |
| MM12T | NLRC4        | NLR family, CARD domain containing 4                                                  | CCDS33174.1     | chr2_32475581-32475581_G_A    | 451A>V  | Substitution | Nonsynonymous coding | 21% |
| MM12T | NLRP14       | NLR family, pyrin domain containing 14                                                | CCDS7776.1      | chr11_7064627-7064627_T_C     | 457V>A  | Substitution | Nonsynonymous coding | 36% |
| MM12T | NLRP3        | NLR family, pyrin domain containing 3                                                 | CCDS1632.1      | chr1_247588376-247588376_C_T  | 544T>M  | Substitution | Nonsynonymous coding | 27% |
| MM12T | NLRP8        | NLR family, pyrin domain containing 8                                                 | CCDS12937.1     | chr19_56459475-56459475_G_A   | 69M>I   | Substitution | Nonsynonymous coding | 11% |
| MM12T | NLRX1        | NLR family member X1                                                                  | CCDS8416.1      | chr11_119050459-119050459_G_A | 577A>T  | Substitution | Nonsynonymous coding | 15% |
| MM12T | NLRX1        | NLR family member X1                                                                  | CCDS8416.1      | chr11_119050985-119050985_C_T | 752A>V  | Substitution | Nonsynonymous coding | 30% |
| MM12T | NLRX1        | NLR family member X1                                                                  | CCDS8416.1      | chr11_119052946-119052946_G_A | 833R>H  | Substitution | Nonsynonymous coding | 15% |
| MM12T | NM_001013690 | -                                                                                     | NM_001013690    | chr12_52215276-52215276_C_T   | 308G>R  | Substitution | Nonsynonymous coding | 31% |
| MM12T | NM_001102659 | -                                                                                     | NM_001102659    | chr2_207509151-207509151_G_A  | 64R>H   | Substitution | Nonsynonymous coding | 22% |
| MM12T | NM_001145073 | -                                                                                     | NM_001145073    | chrX_49645473-49645473_C_T    | 188A>V  | Substitution | Nonsynonymous coding | 32% |



|       |           |                                                            |                 |                               |         |              |                      |     |
|-------|-----------|------------------------------------------------------------|-----------------|-------------------------------|---------|--------------|----------------------|-----|
| MM12T | NM_002248 | -                                                          | NM_002248       | chr19_18104364-18104364_C_T   | 458A>V  | Substitution | Nonsynonymous coding | 27% |
| MM12T | NM_213655 | -                                                          | NM_213655       | chr12_977864-977864_G_A       | 290R>Q  | Substitution | Nonsynonymous coding | 35% |
| MM12T | NMU       | neuromedin U                                               | CCDS3501.1      | chr4_56471464-56471464_C_A    | 138R>I  | Substitution | Nonsynonymous coding | 13% |
| MM12T | NMUR1     | neuromedin U receptor 1                                    | CCDS2486.1      | chr2_232393572-232393572_G_A  | 54P>S   | Substitution | Nonsynonymous coding | 26% |
| MM12T | NNT       | nicotinamide nucleotide transhydrogenase                   | CCDS3949.1      | chr5_43613209-43613209_G_T    | 117K>N  | Substitution | Nonsynonymous coding | 39% |
| MM12T | NNT       | nicotinamide nucleotide transhydrogenase                   | CCDS3949.1      | chr5_43675623-43675623_G_A    | 882R>H  | Substitution | Nonsynonymous coding | 13% |
| MM12T | NOB1      | NIN1/RPN12 binding protein 1 homolog (S. cerevisiae)       | CCDS10884.1     | chr16_69788607-69788607_G_A   | 29T>I   | Substitution | Nonsynonymous coding | 16% |
| MM12T | NOC4L     | nucleolar complex associated 4 homolog (S. cerevisiae)     | CCDS9277.1      | chr12_132636066-132636066_C_T | 371R>W  | Substitution | Nonsynonymous coding | 10% |
| MM12T | NOD2      | nucleotide-binding oligomerization domain containing 2     | CCDS10746.1     | chr16_50745497-50745497_G_T   | 559G>C  | Substitution | Nonsynonymous coding | 31% |
| MM12T | NOL11     | nucleolar protein 11                                       | CCDS11671.1     | chr17_65735053-65735053_C_T   | 590A>V  | Substitution | Nonsynonymous coding | 42% |
| MM12T | NOL11     | nucleolar protein 11                                       | CCDS11671.1     | chr17_65739626-65739626_C_T   | 656A>V  | Substitution | Nonsynonymous coding | 31% |
| MM12T | NOL3      | nucleolar protein 3 (apoptosis repressor with CARD domain) | ENST00000445652 | chr16_67208977-67208977_C_T   | 213R>W  | Substitution | Nonsynonymous coding | 31% |
| MM12T | NOL8      | nucleolar protein 8                                        | CCDS47993.1     | chr9_95077784-95077784_C_T    | 375E>K  | Substitution | Nonsynonymous coding | 24% |
| MM12T | NOM1      | nucleolar protein with MIF4G domain 1                      | CCDS34787.1     | chr7_156759790-156759790_C_T  | ISV+4>  | Substitution | Splice site donor    | 30% |
| MM12T | NOP16     | NOP16 nucleolar protein                                    | CCDS43403.1     | chr5_175812256-175812256_C_T  | 120R>H  | Substitution | Nonsynonymous coding | 37% |
| MM12T | NOP56     | NOP56 ribonucleoprotein                                    | CCDS13030.1     | chr20_2637737-2637737_C_T     | 431A>V  | Substitution | Nonsynonymous coding | 13% |
| MM12T | NOS1      | nitric oxide synthase 1 (neuronal)                         | CCDS41842.1     | chr12_117768300-117768300_G_T | 192T>N  | Substitution | Nonsynonymous coding | 32% |
| MM12T | NOS2      | nitric oxide synthase 2, inducible                         | CCDS11223.1     | chr17_26100217-26100217_C_A   | 510R>I  | Substitution | Nonsynonymous coding | 23% |
| MM12T | NOTCH1    | notch 1                                                    | CCDS43905.1     | chr9_139413115-139413115_C_T  | 343A>T  | Substitution | Nonsynonymous coding | 36% |
| MM12T | NOTCH1    | notch 1                                                    | CCDS43905.1     | chr9_139417601-139417601_G_A  | 148P>L  | Substitution | Nonsynonymous coding | 33% |
| MM12T | NOTCH1    | notch 1                                                    | CCDS43905.1     | chr9_139391011-139391011_G_A  | 2394Q>X | Substitution | Nonsense             | 28% |
| MM12T | NOTCH3    | notch 3                                                    | CCDS12326.1     | chr19_15291040-15291040_G_A   | 1057A>V | Substitution | Nonsynonymous coding | 15% |
| MM12T | NOTCH4    | notch 4                                                    | CCDS34420.1     | chr6_32188854-32188854_G_A    | 234R>W  | Substitution | Nonsynonymous coding | 10% |
| MM12T | NOX1      | NADPH oxidase 1                                            | ENST00000372961 | chrX_100098360-100098360_A_C  | 185F>V  | Substitution | Nonsynonymous coding | 16% |
| MM12T | NOX1      | NADPH oxidase 1                                            | ENST00000372961 | chrX_100098361-100098361_T_A  | 184L>F  | Substitution | Nonsynonymous coding | 15% |
| MM12T | NOX5      | NADPH oxidase, EF-hand calcium binding domain 5            | CCDS32276.1     | chr15_69329449-69329449_C_A   | 406L>M  | Substitution | Nonsynonymous coding | 22% |
| MM12T | NOXA1     | NADPH oxidase activator 1                                  | CCDS7042.1      | chr9_140328429-140328429_C_T  | 398R>W  | Substitution | Nonsynonymous coding | 25% |
| MM12T | NPAS2     | neuronal PAS domain protein 2                              | ENST00000427413 | chr2_101437597-101437597_G_T  | 37Q>H   | Substitution | Nonsynonymous coding | 27% |
| MM12T | NPAS3     | neuronal PAS domain protein 3                              | CCDS9645.1      | chr14_34269029-34269029_G_A   | 474A>T  | Substitution | Nonsynonymous coding | 11% |
| MM12T | NPAS3     | neuronal PAS domain protein 3                              | CCDS9645.1      | chr14_34269138-34269138_C_T   | 510A>V  | Substitution | Nonsynonymous coding | 29% |
| MM12T | NPAT      | nuclear protein, ataxia-telangiectasia locus               | CCDS41710.1     | chr11_108043331-108043331_C_T | 794E>K  | Substitution | Nonsynonymous coding | 17% |
| MM12T | NPAT      | nuclear protein, ataxia-telangiectasia locus               | CCDS41710.1     | chr11_108093238-108093238_C_T | 9R>Q    | Substitution | Nonsynonymous coding | 38% |

|       |        |                                                                           |                 |                              |         |              |                      |     |
|-------|--------|---------------------------------------------------------------------------|-----------------|------------------------------|---------|--------------|----------------------|-----|
| MM12T | NPBWR2 | neuropeptides B/W receptor 2                                              | CCDS13557.1     | chr20_62737419-62737419_G_A  | 256R>W  | Substitution | Nonsynonymous coding | 12% |
| MM12T | NPFFR1 | neuropeptide FF receptor 1                                                | ENST00000277942 | chr10_72015006-72015006_C_T  | 334E>K  | Substitution | Nonsynonymous coding | 38% |
| MM12T | NPFFR1 | neuropeptide FF receptor 1                                                | ENST00000277942 | chr10_72015179-72015179_G_A  | 276A>V  | Substitution | Nonsynonymous coding | 12% |
| MM12T | NPFFR2 | neuropeptide FF receptor 2                                                | CCDS3551.1      | chr4_72897770-72897770_G_T   | 51S>I   | Substitution | Nonsynonymous coding | 15% |
| MM12T | NPHP4  | nephronophthisis 4                                                        | CCDS44052.1     | chr1_5925190-5925190_G_A     | 1263A>V | Substitution | Nonsynonymous coding | 38% |
| MM12T | NPHP4  | nephronophthisis 4                                                        | CCDS44052.1     | chr1_6007168-6007168_C_T     | 372G>D  | Substitution | Nonsynonymous coding | 10% |
| MM12T | NPHS1  | nephrosis 1, congenital, Finnish type (nephrin)                           | CCDS32996.1     | chr19_36335278-36335278_C_T  | 672A>T  | Substitution | Nonsynonymous coding | 35% |
| MM12T | NPL    | N-acetylneuraminate pyruvate lyase (dihydrodipicolinate synthase)         | CCDS1350.1      | chr1_182787787-182787787_G_A | 190R>H  | Substitution | Nonsynonymous coding | 36% |
| MM12T | NPNT   | nephronectin                                                              | CCDS34046.1     | chr4_106858208-106858208_G_A | 103R>K  | Substitution | Nonsynonymous coding | 21% |
| MM12T | NPRL3  | nitrogen permease regulator-like 3 (S. cerevisiae)                        | ENST00000399953 | chr16_180531-180531_C_T      | 60G>S   | Substitution | Nonsynonymous coding | 39% |
| MM12T | NPTX1  | neuronal pentraxin I                                                      | CCDS32762.1     | chr17_78450197-78450197_A_G  | 17L>P   | Substitution | Nonsynonymous coding | 38% |
| MM12T | NPY    | neuropeptide Y                                                            | CCDS5387.1      | chr7_24324942-24324942_C_T   | 28A>V   | Substitution | Nonsynonymous coding | 12% |
| MM12T | NPY1R  | neuropeptide Y receptor Y1                                                | CCDS34089.1     | chr4_164247198-164247198_G_A | 170S>F  | Substitution | Nonsynonymous coding | 11% |
| MM12T | NPY2R  | neuropeptide Y receptor Y2                                                | CCDS3791.1      | chr4_156136152-156136152_C_T | 354S>F  | Substitution | Nonsynonymous coding | 12% |
| MM12T | NR0B1  | nuclear receptor subfamily 0, group B, member 1                           | CCDS14223.1     | chrX_30322856-30322856_G_A   | 418T>M  | Substitution | Nonsynonymous coding | 27% |
| MM12T | NR0B1  | nuclear receptor subfamily 0, group B, member 1                           | CCDS14223.1     | chrX_30327348-30327348_C_T   | 45D>N   | Substitution | Nonsynonymous coding | 14% |
| MM12T | NR1D1  | nuclear receptor subfamily 1, group D, member 1                           | CCDS11361.1     | chr17_38251869-38251869_C_T  | 359R>H  | Substitution | Nonsynonymous coding | 22% |
| MM12T | NR2F1  | nuclear receptor subfamily 2, group F, member 1                           | CCDS4068.1      | chr5_92929447-92929447_G_A   | 391V>I  | Substitution | Nonsynonymous coding | 34% |
| MM12T | NR2F2  | nuclear receptor subfamily 2, group F, member 2                           | CCDS10375.1     | chr15_96877812-96877812_C_T  | 317A>V  | Substitution | Nonsynonymous coding | 37% |
| MM12T | NR3C1  | nuclear receptor subfamily 3, group C, member 1 (glucocorticoid receptor) | CCDS34258.1     | chr5_142779249-142779249_G_A | 386R>X  | Substitution | Nonsense             | 14% |
| MM12T | NRDE2  | NRDE-2, necessary for RNA interference, domain containing                 | CCDS9890.1      | chr14_90778852-90778852_C_T  | 148R>H  | Substitution | Nonsynonymous coding | 13% |
| MM12T | NRG1   | neuregulin 1                                                              | CCDS6083.1      | chr8_32616830-32616830_G_A   | 318V>I  | Substitution | Nonsynonymous coding | 12% |
| MM12T | NRG3   | neuregulin 3                                                              | CCDS31233.1     | chr10_84745345-84745345_C_T  | 692S>F  | Substitution | Nonsynonymous coding | 13% |
| MM12T | NRK    | Nik related kinase                                                        | NM_198465       | chrX_105153391-105153391_G_T | 586Q>H  | Substitution | Nonsynonymous coding | 11% |
| MM12T | NRXN2  | neurexin 2                                                                | CCDS8077.1      | chr11_64435006-64435006_G_A  | 505A>V  | Substitution | Nonsynonymous coding | 27% |
| MM12T | NRXN3  | neurexin 3                                                                | CCDS9870.1      | chr14_80164060-80164060_G_A  | 862G>E  | Substitution | Nonsynonymous coding | 11% |
| MM12T | NSD1   | nuclear receptor binding SET domain protein 1                             | CCDS4412.1      | chr5_176637231-176637231_C_T | 611R>X  | Substitution | Nonsense             | 26% |
| MM12T | NSDHL  | NAD(P) dependent steroid dehydrogenase-like                               | CCDS14717.1     | chrX_152031162-152031162_C_T | 146A>V  | Substitution | Nonsynonymous coding | 21% |
| MM12T | NSMF   | NMDA receptor synaptonuclear signaling and neuronal migration factor      | CCDS48069.1     | chr9_140347223-140347223_G_A | 366R>C  | Substitution | Nonsynonymous coding | 34% |
| MM12T | NSUN2  | NOP2/Sun RNA methyltransferase family, member 2                           | CCDS3869.1      | chr5_6604332-6604332_C_A     | 626D>Y  | Substitution | Nonsynonymous coding | 14% |
| MM12T | NSUN2  | NOP2/Sun RNA methyltransferase family, member 2                           | CCDS3869.1      | chr5_6604788-6604788_G_A     | 583T>M  | Substitution | Nonsynonymous coding | 13% |
| MM12T | NT5C1A | 5'-nucleotidase, cytosolic IA                                             | CCDS440.1       | chr1_40131301-40131301_G_A   | 109R>W  | Substitution | Nonsynonymous coding | 61% |

|       |         |                                                                    |                 |                               |         |              |                      |     |
|-------|---------|--------------------------------------------------------------------|-----------------|-------------------------------|---------|--------------|----------------------|-----|
| MM12T | NT5C1B  | 5'-nucleotidase, cytosolic 1B                                      | CCDS33150.1     | chr2_18768783-18768783_G_A    | 36R>C   | Substitution | Nonsynonymous coding | 14% |
| MM12T | NT5DC2  | 5'-nucleotidase domain containing 2                                | CCDS46843.1     | chr3_52562687-52562687_C_T    | 172A>T  | Substitution | Nonsynonymous coding | 25% |
| MM12T | NT5M    | 5',3'-nucleotidase, mitochondrial                                  | CCDS32581.1     | chr17_17207015-17207015_G_A   | 51G>S   | Substitution | Nonsynonymous coding | 31% |
| MM12T | NTHL1   | nth endonuclease III-like 1 (E. coli)                              | CCDS10457.1     | chr16_2093639-2093639_G_A     | 213A>V  | Substitution | Nonsynonymous coding | 10% |
| MM12T | NTNG1   | netrin G1                                                          | CCDS44180.1     | chr1_107867537-107867537_C_T  | 294R>X  | Substitution | Nonsense             | 33% |
| MM12T | NTNG2   | netrin G2                                                          | CCDS6946.1      | chr9_135073993-135073993_G_A  | 285G>D  | Substitution | Nonsynonymous coding | 11% |
| MM12T | NTRK3   | neurotrophic tyrosine kinase, receptor, type 3                     | CCDS32323.1     | chr15_88522589-88522589_C_T   | 609R>H  | Substitution | Nonsynonymous coding | 33% |
| MM12T | NUCB2   | nucleobindin 2                                                     | CCDS41623.1     | chr11_17316998-17316998_C_T   | 43A>V   | Substitution | Nonsynonymous coding | 38% |
| MM12T | NUDT10  | nudix (nucleoside diphosphate linked moiety X)-type motif 10       | CCDS35278.1     | chrX_51076278-51076278_C_T    | 154S>F  | Substitution | Nonsynonymous coding | 43% |
| MM12T | NUDT14  | nudix (nucleoside diphosphate linked moiety X)-type motif 14       | CCDS10000.1     | chr14_105644038-105644038_G_A | 39T>M   | Substitution | Nonsynonymous coding | 10% |
| MM12T | NUDT18  | nudix (nucleoside diphosphate linked moiety X)-type motif 18       | ENST00000309188 | chr8_21966701-21966701_C_T    | ISV-1>  | Substitution | Splice site acceptor | 29% |
| MM12T | NUDT22  | nudix (nucleoside diphosphate linked moiety X)-type motif 22       | CCDS8061.1      | chr11_63994252-63994252_C_T   | 43A>V   | Substitution | Nonsynonymous coding | 10% |
| MM12T | NUDT9   | nudix (nucleoside diphosphate linked moiety X)-type motif 9        | CCDS3620.1      | chr4_88378991-88378991_C_A    | ISV-4>  | Substitution | Splice site acceptor | 16% |
| MM12T | NUFIP2  | nuclear fragile X mental retardation protein interacting protein 2 | CCDS32600.1     | chr17_27613076-27613076_C_A   | 646G>C  | Substitution | Nonsynonymous coding | 36% |
| MM12T | NUMA1   | nuclear mitotic apparatus protein 1                                | CCDS31633.1     | chr11_71718312-71718312_C_T   | 1796V>I | Substitution | Nonsynonymous coding | 28% |
| MM12T | NUMA1   | nuclear mitotic apparatus protein 1                                | CCDS31633.1     | chr11_71725413-71725413_C_T   | 1046A>T | Substitution | Nonsynonymous coding | 11% |
| MM12T | NUP107  | nucleoporin 107kDa                                                 | CCDS8985.1      | chr12_69084446-69084446_G_T   | 75D>Y   | Substitution | Nonsynonymous coding | 12% |
| MM12T | NUP155  | nucleoporin 155kDa                                                 | CCDS3921.1      | chr5_37310731-37310731_C_T    | 851A>T  | Substitution | Nonsynonymous coding | 40% |
| MM12T | NUP155  | nucleoporin 155kDa                                                 | CCDS3921.1      | chr5_37352911-37352911_G_A    | 162R>X  | Substitution | Nonsense             | 22% |
| MM12T | NUP210L | nucleoporin 210kDa-like                                            | CCDS41399.1     | chr1_154112383-154112383_TA   | NA      | Insertion    | Frameshift           | 18% |
| MM12T | NUP210L | nucleoporin 210kDa-like                                            | CCDS41399.1     | chr1_154098893-154098893_T_C  | 411Q>R  | Substitution | Nonsynonymous coding | 31% |
| MM12T | NUP35   | nucleoporin 35kDa                                                  | CCDS2290.1      | chr2_183995269-183995269_G_A  | 112R>K  | Substitution | Nonsynonymous coding | 12% |
| MM12T | NUP43   | nucleoporin 43kDa                                                  | CCDS5218.1      | chr6_150063531-150063531_G_A  | 166T>I  | Substitution | Nonsynonymous coding | 58% |
| MM12T | NUP62   | nucleoporin 62kDa                                                  | CCDS12788.1     | chr19_50412826-50412826_G_A   | 80T>I   | Substitution | Nonsynonymous coding | 35% |
| MM12T | NUP98   | nucleoporin 98kDa                                                  | CCDS7746.1      | chr11_3797197-3797197_G_T     | 137S>Y  | Substitution | Nonsynonymous coding | 29% |
| MM12T | NWD1    | NACHT and WD repeat domain containing 1                            | CCDS32945.1     | chr19_16910916-16910916_G_A   | 1092V>I | Substitution | Nonsynonymous coding | 12% |
| MM12T | NXN     | nucleoredoxin                                                      | CCDS10998.1     | chr17_708440-708440_G_A       | 290R>W  | Substitution | Nonsynonymous coding | 17% |
| MM12T | NXPE2   | neurexophilin and PC-esterase domain family, member 2              | CCDS44738.1     | chr11_114550402-114550402_C_T | 17A>V   | Substitution | Nonsynonymous coding | 21% |
| MM12T | NXPH2   | neurexophilin 2                                                    | CCDS46421.1     | chr2_139429072-139429072_G_A  | 72A>V   | Substitution | Nonsynonymous coding | 13% |
| MM12T | NXPH4   | neurexophilin 4                                                    | CCDS8933.1      | chr12_57618661-57618661_G_A   | 20A>T   | Substitution | Nonsynonymous coding | 53% |
| MM12T | NYNRIN  | NYN domain and retroviral integrase containing                     | CCDS45090.1     | chr14_24886261-24886261_C_T   | 1769T>M | Substitution | Nonsynonymous coding | 29% |
| MM12T | NYX     | nyctalopin                                                         | CCDS14256.1     | chrX_41333520-41333520_G_A    | 272A>T  | Substitution | Nonsynonymous coding | 18% |

|       |        |                                                                |                 |                               |         |              |                      |     |
|-------|--------|----------------------------------------------------------------|-----------------|-------------------------------|---------|--------------|----------------------|-----|
| MM12T | OAS1   | 2'-5'-oligoadenylate synthetase 1, 40/46kDa                    | CCDS31905.1     | chr12_113355473-113355473_G_A | 336D>N  | Substitution | Nonsynonymous coding | 14% |
| MM12T | OAS2   | 2'-5'-oligoadenylate synthetase 2, 69/71kDa                    | CCDS31906.1     | chr12_113435362-113435362_C_T | 222P>L  | Substitution | Nonsynonymous coding | 33% |
| MM12T | OAS2   | 2'-5'-oligoadenylate synthetase 2, 69/71kDa                    | CCDS31906.1     | chr12_113444353-113444353_G_A | 535R>Q  | Substitution | Nonsynonymous coding | 36% |
| MM12T | OBSCN  | obscurin, cytoskeletal calmodulin and titin-interacting RhoGEF | NM_001098623    | chr1_228404743-228404743_G_A  | 803A>T  | Substitution | Nonsynonymous coding | 32% |
| MM12T | OBSCN  | obscurin, cytoskeletal calmodulin and titin-interacting RhoGEF | ENST00000366707 | chr1_228486400-228486400_G_A  | 1088A>T | Substitution | Nonsynonymous coding | 11% |
| MM12T | OBSCN  | obscurin, cytoskeletal calmodulin and titin-interacting RhoGEF | ENST00000366707 | chr1_228491603-228491603_G_A  | 1346G>R | Substitution | Nonsynonymous coding | 40% |
| MM12T | OBSCN  | obscurin, cytoskeletal calmodulin and titin-interacting RhoGEF | NM_001098623    | chr1_228528934-228528934_G_A  | 5946V>M | Substitution | Nonsynonymous coding | 34% |
| MM12T | OBSCN  | obscurin, cytoskeletal calmodulin and titin-interacting RhoGEF | NM_001098623    | chr1_228538592-228538592_G_A  | 6123E>K | Substitution | Nonsynonymous coding | 29% |
| MM12T | OBSCN  | obscurin, cytoskeletal calmodulin and titin-interacting RhoGEF | NM_052843       | chr1_228548296-228548296_C_T  | 6568T>M | Substitution | Nonsynonymous coding | 33% |
| MM12T | OBSCN  | obscurin, cytoskeletal calmodulin and titin-interacting RhoGEF | NM_001098623    | chr1_228504522-228504522_G_A  | 4466W>X | Substitution | Nonsense             | 31% |
| MM12T | ODF2   | outer dense fiber of sperm tails 2                             | CCDS6903.1      | chr9_131231610-131231610_C_T  | 109A>V  | Substitution | Nonsynonymous coding | 28% |
| MM12T | ODF2L  | outer dense fiber of sperm tails 2-like                        | CCDS30763.1     | chr1_86842104-86842104_A      | NA      | Insertion    | Splice site acceptor | 11% |
| MM12T | OGDH   | oxoglutarate (alpha-ketoglutarate) dehydrogenase (lipoamide)   | CCDS34627.1     | chr7_44737349-44737349_G_A    | 776V>M  | Substitution | Nonsynonymous coding | 28% |
| MM12T | OGDHL  | oxoglutarate dehydrogenase-like                                | CCDS7234.1      | chr10_50952060-50952060_T_A   | 614E>V  | Substitution | Nonsynonymous coding | 27% |
| MM12T | OIT3   | oncoprotein induced transcript 3                               | CCDS7318.1      | chr10_74660162-74660162_G_A   | 155C>Y  | Substitution | Nonsynonymous coding | 32% |
| MM12T | OLFM1  | olfactomedin 1                                                 | CCDS6986.1      | chr9_138011632-138011632_G_A  | 338D>N  | Substitution | Nonsynonymous coding | 32% |
| MM12T | OLFM2  | olfactomedin 2                                                 | CCDS12221.1     | chr19_9971361-9971361_C_T     | 58R>Q   | Substitution | Nonsynonymous coding | 35% |
| MM12T | OLFM4  | olfactomedin 4                                                 | CCDS9440.1      | chr13_53624424-53624424_G_A   | 351V>I  | Substitution | Nonsynonymous coding | 30% |
| MM12T | OLIG2  | oligodendrocyte lineage transcription factor 2                 | CCDS13620.1     | chr21_34399786-34399786_G_A   | 206A>T  | Substitution | Nonsynonymous coding | 17% |
| MM12T | OPA1   | optic atrophy 1 (autosomal dominant)                           | CCDS33917.1     | chr3_193384964-193384964_C_T  | 942R>X  | Substitution | Nonsense             | 12% |
| MM12T | OPCML  | opioid binding protein/cell adhesion molecule-like             | CCDS8492.1      | chr11_132306087-132306087_C_T | 277R>H  | Substitution | Nonsynonymous coding | 11% |
| MM12T | OPCML  | opioid binding protein/cell adhesion molecule-like             | CCDS8492.1      | chr11_132527042-132527042_T_C | 114T>A  | Substitution | Nonsynonymous coding | 29% |
| MM12T | OPLAH  | 5-oxoprolinase (ATP-hydrolysing)                               | ENST00000426825 | chr8_145107739-145107739_C_T  | 1028R>Q | Substitution | Nonsynonymous coding | 31% |
| MM12T | OPLAH  | 5-oxoprolinase (ATP-hydrolysing)                               | ENST00000426825 | chr8_145109512-145109512_C_T  | 880V>I  | Substitution | Nonsynonymous coding | 29% |
| MM12T | OPRD1  | opioid receptor, delta 1                                       | CCDS329.1       | chr1_29189718-29189718_G_A    | 348A>T  | Substitution | Nonsynonymous coding | 27% |
| MM12T | OR10A2 | olfactory receptor, family 10, subfamily A, member 2           | CCDS31415.1     | chr11_6891137-6891137_G_A     | 51R>K   | Substitution | Nonsynonymous coding | 12% |
| MM12T | OR10C1 | olfactory receptor, family 10, subfamily C, member 1           | ENST00000383554 | chr6_29385483-29385483_G_A    | 143A>T  | Substitution | Nonsynonymous coding | 21% |
| MM12T | OR10C1 | olfactory receptor, family 10, subfamily C, member 1           | CCDS34364.1     | chr6_29408484-29408484_C_T    | 231A>V  | Substitution | Nonsynonymous coding | 10% |
| MM12T | OR10J3 | olfactory receptor, family 10, subfamily J, member 3           | CCDS30909.1     | chr1_159284446-159284446_G_A  | 2P>S    | Substitution | Nonsynonymous coding | 16% |
| MM12T | OR10X1 | olfactory receptor, family 10, subfamily X, member 1           | CCDS30900.1     | chr1_158549160-158549160_G_A  | 177A>V  | Substitution | Nonsynonymous coding | 36% |
| MM12T | OR11L1 | olfactory receptor, family 11, subfamily L, member 1           | CCDS31098.1     | chr1_248004904-248004904_C_T  | 99A>T   | Substitution | Nonsynonymous coding | 11% |
| MM12T | OR12D2 | olfactory receptor, family 12, subfamily D, member 2           | CCDS4659.1      | chr6_29364862-29364862_G_A    | 129R>H  | Substitution | Nonsynonymous coding | 14% |

|       |        |                                                      |                 |                              |        |              |                      |     |
|-------|--------|------------------------------------------------------|-----------------|------------------------------|--------|--------------|----------------------|-----|
| MM12T | OR13D1 | olfactory receptor, family 13, subfamily D, member 1 | CCDS35094.1     | chr9_107457103-107457103_T_G | 134V>G | Substitution | Nonsynonymous coding | 22% |
| MM12T | OR13H1 | olfactory receptor, family 13, subfamily H, member 1 | CCDS35396.1     | chrX_130678052-130678052_C_T | 2A>V   | Substitution | Nonsynonymous coding | 15% |
| MM12T | OR1B1  | olfactory receptor, family 1, subfamily B, member 1  | CCDS35126.1     | chr9_125391117-125391117_C_T | 233R>H | Substitution | Nonsynonymous coding | 30% |
| MM12T | OR1C1  | olfactory receptor, family 1, subfamily C, member 1  | CCDS41481.1     | chr1_247921417-247921417_G_T | 98L>I  | Substitution | Nonsynonymous coding | 33% |
| MM12T | OR1G1  | olfactory receptor, family 1, subfamily G, member 1  | CCDS11020.1     | chr17_3029963-3029963_G_T    | 295Q>K | Substitution | Nonsynonymous coding | 12% |
| MM12T | OR1M1  | olfactory receptor, family 1, subfamily M, member 1  | CCDS32896.1     | chr19_9204579-9204579_G_A    | 220R>H | Substitution | Nonsynonymous coding | 12% |
| MM12T | OR2AJ1 | olfactory receptor, family 2, subfamily AJ, member 1 | ENST00000318244 | chr1_248097830-248097830_C_T | 254P>S | Substitution | Nonsynonymous coding | 24% |
| MM12T | OR2B6  | olfactory receptor, family 2, subfamily B, member 6  | CCDS4642.1      | chr6_27925374-27925374_C_T   | 119S>F | Substitution | Nonsynonymous coding | 14% |
| MM12T | OR2D2  | olfactory receptor, family 2, subfamily D, member 2  | CCDS31416.1     | chr11_6913368-6913368_G_A    | 122R>C | Substitution | Nonsynonymous coding | 39% |
| MM12T | OR2F1  | olfactory receptor, family 2, subfamily F, member 1  | CCDS5887.1      | chr7_143657472-143657472_C_T | 137H>Y | Substitution | Nonsynonymous coding | 24% |
| MM12T | OR2J2  | olfactory receptor, family 2, subfamily J, member 2  | CCDS43434.1     | chr6_29141422-29141422_A_    | NA     | Deletion     | Frameshift           | 17% |
| MM12T | OR2K2  | olfactory receptor, family 2, subfamily K, member 2  | CCDS6778.1      | chr9_114090553-114090553_C_T | 54R>H  | Substitution | Nonsynonymous coding | 32% |
| MM12T | OR2T11 | olfactory receptor, family 2, subfamily T, member 11 | CCDS31122.1     | chr1_248789613-248789613_C_T | 273A>T | Substitution | Nonsynonymous coding | 13% |
| MM12T | OR4B1  | olfactory receptor, family 4, subfamily B, member 1  | CCDS31485.1     | chr11_48238587-48238587_G_A  | 76A>T  | Substitution | Nonsynonymous coding | 12% |
| MM12T | OR4C3  | olfactory receptor, family 4, subfamily C, member 3  | CCDS31489.1     | chr11_48347010-48347010_C_T  | 173A>V | Substitution | Nonsynonymous coding | 11% |
| MM12T | OR4M2  | olfactory receptor, family 4, subfamily M, member 2  | CCDS32172.1     | chr15_22369024-22369024_G_   | NA     | Deletion     | Frameshift           | 22% |
| MM12T | OR4S2  | olfactory receptor, family 4, subfamily S, member 2  | CCDS31505.1     | chr11_55418488-55418488_C_T  | 37L>F  | Substitution | Nonsynonymous coding | 19% |
| MM12T | OR52E8 | olfactory receptor, family 52, subfamily E, member 8 | CCDS31400.1     | chr11_5878155-5878155_C_A    | 260A>S | Substitution | Nonsynonymous coding | 28% |
| MM12T | OR52M1 | olfactory receptor, family 52, subfamily M, member 1 | CCDS31353.1     | chr11_4566629-4566629_C_T    | 70A>V  | Substitution | Nonsynonymous coding | 11% |
| MM12T | OR52M1 | olfactory receptor, family 52, subfamily M, member 1 | CCDS31353.1     | chr11_4567036-4567036_G_A    | 206G>S | Substitution | Nonsynonymous coding | 36% |
| MM12T | OR52M1 | olfactory receptor, family 52, subfamily M, member 1 | CCDS31353.1     | chr11_4567334-4567334_G_A    | 305S>N | Substitution | Nonsynonymous coding | 32% |
| MM12T | OR52N1 | olfactory receptor, family 52, subfamily N, member 1 | CCDS31398.1     | chr11_5809325-5809325_C_A    | 241S>I | Substitution | Nonsynonymous coding | 29% |
| MM12T | OR52N2 | olfactory receptor, family 52, subfamily N, member 2 | CCDS31399.1     | chr11_5842064-5842064_C_T    | 167R>C | Substitution | Nonsynonymous coding | 13% |
| MM12T | OR56B4 | olfactory receptor, family 56, subfamily B, member 4 | CCDS31406.1     | chr11_6129486-6129486_C_A    | 160L>M | Substitution | Nonsynonymous coding | 32% |
| MM12T | OR5AP2 | olfactory receptor, family 5, subfamily AP, member 2 | CCDS31534.1     | chr11_56409258-56409258_C_T  | 220V>I | Substitution | Nonsynonymous coding | 18% |
| MM12T | OR5B21 | olfactory receptor, family 5, subfamily B, member 21 | CCDS31552.1     | chr11_58275313-58275313_G_A  | 89A>V  | Substitution | Nonsynonymous coding | 12% |
| MM12T | OR5D13 | olfactory receptor, family 5, subfamily D, member 13 | CCDS31507.1     | chr11_55541274-55541274_G_A  | 121A>T | Substitution | Nonsynonymous coding | 15% |
| MM12T | OR5D13 | olfactory receptor, family 5, subfamily D, member 13 | CCDS31507.1     | chr11_55541761-55541761_C_T  | 283A>V | Substitution | Nonsynonymous coding | 33% |
| MM12T | OR5K4  | olfactory receptor, family 5, subfamily K, member 4  | CCDS33802.1     | chr3_98073181-98073181_C_A   | 162L>I | Substitution | Nonsynonymous coding | 21% |
| MM12T | OR5L2  | olfactory receptor, family 5, subfamily L, member 2  | CCDS31511.1     | chr11_55595206-55595206_C_A  | 171S>Y | Substitution | Nonsynonymous coding | 39% |
| MM12T | OR5M10 | olfactory receptor, family 5, subfamily M, member 10 | NM_001004741    | chr11_56344878-56344878_A_G  | 107L>P | Substitution | Nonsynonymous coding | 25% |
| MM12T | OR6A2  | olfactory receptor, family 6, subfamily A, member 2  | CCDS7772.1      | chr11_6816101-6816101_G_T    | 280S>Y | Substitution | Nonsynonymous coding | 11% |

|       |        |                                                      |                 |                               |         |              |                      |     |
|-------|--------|------------------------------------------------------|-----------------|-------------------------------|---------|--------------|----------------------|-----|
| MM12T | OR6C75 | olfactory receptor, family 6, subfamily C, member 75 | CCDS31820.1     | chr12_55759102-55759102_T_C   | 70S>P   | Substitution | Nonsynonymous coding | 29% |
| MM12T | OR6C76 | olfactory receptor, family 6, subfamily C, member 76 | CCDS31823.1     | chr12_55820959-55820959__A    | NA      | Insertion    | Frameshift           | 15% |
| MM12T | OR6K2  | olfactory receptor, family 6, subfamily K, member 2  | CCDS30902.1     | chr1_158669781-158669781_C_T  | 221G>D  | Substitution | Nonsynonymous coding | 34% |
| MM12T | OR6M1  | olfactory receptor, family 6, subfamily M, member 1  | CCDS31696.1     | chr11_123676786-123676786_G_T | 91S>Y   | Substitution | Nonsynonymous coding | 32% |
| MM12T | OR6Q1  | olfactory receptor, family 6, subfamily Q, member 1  | CCDS31541.1     | chr11_57798690-57798690_G_A   | 89G>E   | Substitution | Nonsynonymous coding | 23% |
| MM12T | OR8D1  | olfactory receptor, family 8, subfamily D, member 1  | CCDS31706.1     | chr11_124179992-124179992_C_A | 224S>I  | Substitution | Nonsynonymous coding | 47% |
| MM12T | OR8H2  | olfactory receptor, family 8, subfamily H, member 2  | CCDS31518.1     | chr11_55872926-55872926_G_A   | 136M>I  | Substitution | Nonsynonymous coding | 12% |
| MM12T | ORC1   | origin recognition complex, subunit 1                | CCDS566.1       | chr1_52838903-52838903_G_A    | 846R>W  | Substitution | Nonsynonymous coding | 30% |
| MM12T | ORC6   | origin recognition complex, subunit 6                | CCDS10722.1     | chr16_46729525-46729525_A_    | NA      | Deletion     | Frameshift           | 30% |
| MM12T | OSBPL3 | oxysterol binding protein-like 3                     | CCDS5390.1      | chr7_24901346-24901346_T_C    | 305N>D  | Substitution | Nonsynonymous coding | 26% |
| MM12T | OSBPL5 | oxysterol binding protein-like 5                     | CCDS31344.1     | chr11_3114884-3114884_C_T     | 607V>M  | Substitution | Nonsynonymous coding | 11% |
| MM12T | OSBPL6 | oxysterol binding protein-like 6                     | CCDS2278.1      | chr2_179214002-179214002_A_G  | 351N>D  | Substitution | Nonsynonymous coding | 13% |
| MM12T | OSBPL7 | oxysterol binding protein-like 7                     | CCDS11515.1     | chr17_45897356-45897356_G_T   | 61P>H   | Substitution | Nonsynonymous coding | 20% |
| MM12T | OSBPL9 | oxysterol binding protein-like 9                     | CCDS44145.1     | chr1_52246907-52246907_C_T    | 453A>V  | Substitution | Nonsynonymous coding | 15% |
| MM12T | OSGIN1 | oxidative stress induced growth inhibitor 1          | CCDS10938.1     | chr16_83998725-83998725_G_A   | 266V>M  | Substitution | Nonsynonymous coding | 13% |
| MM12T | OSMR   | oncostatin M receptor                                | CCDS3928.1      | chr5_38884115-38884115_G_A    | 202S>N  | Substitution | Nonsynonymous coding | 39% |
| MM12T | OTOF   | otoferlin                                            | CCDS1725.1      | chr2_26700057-26700057_G_A    | 836R>C  | Substitution | Nonsynonymous coding | 14% |
| MM12T | OTOG   | otogelin                                             | ENST00000399391 | chr11_17627457-17627457_G_A   | 1323V>I | Substitution | Nonsynonymous coding | 10% |
| MM12T | OTOG   | otogelin                                             | ENST00000399391 | chr11_17662609-17662609_T_C   | 2733S>P | Substitution | Nonsynonymous coding | 12% |
| MM12T | OTOP3  | otopetrin 3                                          | CCDS11709.1     | chr17_72937646-72937646_C_T   | 78R>W   | Substitution | Nonsynonymous coding | 13% |
| MM12T | OTOP3  | otopetrin 3                                          | CCDS11709.1     | chr17_72939724-72939724_C_T   | 237A>V  | Substitution | Nonsynonymous coding | 14% |
| MM12T | OTUB1  | OTU domain, ubiquitin aldehyde binding 1             | CCDS8055.1      | chr11_63764867-63764867_C_T   | 222A>V  | Substitution | Nonsynonymous coding | 14% |
| MM12T | OTUD1  | OTU domain containing 1                              | CCDS44366.1     | chr10_23729764-23729764_G_A   | 460E>K  | Substitution | Nonsynonymous coding | 25% |
| MM12T | OTUD7A | OTU domain containing 7A                             | CCDS10026.1     | chr15_31775580-31775580_G_A   | 900R>C  | Substitution | Nonsynonymous coding | 15% |
| MM12T | OTUD7A | OTU domain containing 7A                             | CCDS10026.1     | chr15_31775735-31775735_G_A   | 848S>L  | Substitution | Nonsynonymous coding | 38% |
| MM12T | OTUD7A | OTU domain containing 7A                             | CCDS10026.1     | chr15_31776405-31776405_G_T   | 625L>M  | Substitution | Nonsynonymous coding | 31% |
| MM12T | OTUD7A | OTU domain containing 7A                             | CCDS10026.1     | chr15_31776492-31776492_C_T   | 596A>T  | Substitution | Nonsynonymous coding | 33% |
| MM12T | OTX2   | orthodenticle homeobox 2                             | CCDS9728.1      | chr14_57270953-57270953_G_A   | 76R>X   | Substitution | Nonsense             | 11% |
| MM12T | OXCT1  | 3-oxoacid CoA transferase 1                          | CCDS3937.1      | chr5_41739521-41739521_C_T    | 498V>I  | Substitution | Nonsynonymous coding | 18% |
| MM12T | OXCT2  | 3-oxoacid CoA transferase 2                          | CCDS445.1       | chr1_40236054-40236054_C_T    | 292A>T  | Substitution | Nonsynonymous coding | 23% |
| MM12T | OXCT2  | 3-oxoacid CoA transferase 2                          | CCDS445.1       | chr1_40236290-40236290_C_A    | 213W>L  | Substitution | Nonsynonymous coding | 40% |
| MM12T | P2RX5  | purinergic receptor P2X, ligand-gated ion channel, 5 | CCDS11034.1     | chr17_3593422-3593422_C_T     | 186E>K  | Substitution | Nonsynonymous coding | 37% |

|       |          |                                                                             |                |                               |         |              |                      |     |
|-------|----------|-----------------------------------------------------------------------------|----------------|-------------------------------|---------|--------------|----------------------|-----|
| MM12T | P2RY10   | purinergic receptor P2Y, G-protein coupled, 10                              | CCDS14442.1    | chrX_78216132-78216132_A_G    | 39T>A   | Substitution | Nonsynonymous coding | 17% |
| MM12T | P2RY14   | purinergic receptor P2Y, G-protein coupled, 14                              | CCDS3156.1     | chr3_150932029-150932029_G_A  | 26P>S   | Substitution | Nonsynonymous coding | 30% |
| MM12T | P2RY4    | pyrimidinergic receptor P2Y, G-protein coupled, 4                           | CCDS14398.1    | chrX_69479315-69479315_C_T    | 54A>T   | Substitution | Nonsynonymous coding | 11% |
| MM12T | P4HA3    | prolyl 4-hydroxylase, alpha polypeptide III                                 | CCDS8230.1     | chr11_73978342-73978342_T_C   | 529E>G  | Substitution | Nonsynonymous coding | 46% |
| MM12T | P4HTM    | prolyl 4-hydroxylase, transmembrane (endoplasmic reticulum)                 | CCDS2781.2     | chr3_49042451-49042451_G_A    | 349E>K  | Substitution | Nonsynonymous coding | 30% |
| MM12T | PA2G4    | proliferation-associated 2G4, 38kDa                                         | CCDS8902.1     | chr12_56500503-56500503_A_    | NA      | Deletion     | Splice site donor    | 20% |
| MM12T | PABPC4   | poly(A) binding protein, cytoplasmic 4 (inducible form)                     | CCDS44115.1    | chr1_40030200-40030200_G_A    | 450P>S  | Substitution | Nonsynonymous coding | 31% |
| MM12T | PACRG    | PARK2 co-regulated                                                          | CCDS5284.1     | chr6_163149275-163149275_C_T  | 3A>V    | Substitution | Nonsynonymous coding | 50% |
| MM12T | PADI6    | peptidyl arginine deiminase, type VI                                        | ENST0000358481 | chr1_17708468-17708468_C_T    | 187T>M  | Substitution | Nonsynonymous coding | 18% |
| MM12T | PAEP     | progesterone-associated endometrial protein                                 | CCDS35173.1    | chr9_138453678-138453678_G_A  | 11A>T   | Substitution | Nonsynonymous coding | 11% |
| MM12T | PAEP     | progesterone-associated endometrial protein                                 | CCDS35173.1    | chr9_138456131-138456131_G_A  | 118D>N  | Substitution | Nonsynonymous coding | 10% |
| MM12T | PAFAH1B1 | platelet-activating factor acetylhydrolase 1b, regulatory subunit 1 (45kDa) | CCDS32528.1    | chr17_2573487-2573487_C_T     | 144R>X  | Substitution | Nonsense             | 24% |
| MM12T | PAG1     | phosphoprotein associated with glycosphingolipid microdomains 1             | CCDS6227.1     | chr8_81888912-81888912_G_A    | 389A>V  | Substitution | Nonsynonymous coding | 30% |
| MM12T | PAG1     | phosphoprotein associated with glycosphingolipid microdomains 1             | CCDS6227.1     | chr8_81897261-81897261_G_A    | 209A>V  | Substitution | Nonsynonymous coding | 27% |
| MM12T | PALLD    | palladin, cytoskeletal associated protein                                   | CCDS34098.1    | chr4_169845445-169845445_T_A  | 1016L>H | Substitution | Nonsynonymous coding | 22% |
| MM12T | PALMD    | palmdelphin                                                                 | CCDS758.1      | chr1_100154394-100154394_C_A  | 193S>Y  | Substitution | Nonsynonymous coding | 10% |
| MM12T | PAM      | peptidylglycine alpha-amidating monooxygenase                               | CCDS43348.1    | chr5_102285605-102285605_G_T  | ISV-1>  | Substitution | Splice site acceptor | 24% |
| MM12T | PANK4    | pantothenate kinase 4                                                       | CCDS42.1       | chr1_2449631-2449631_C_T      | 397G>D  | Substitution | Nonsynonymous coding | 12% |
| MM12T | PANX1    | pannexin 1                                                                  | CCDS8296.1     | chr11_93886708-93886708_C_T   | 78A>V   | Substitution | Nonsynonymous coding | 33% |
| MM12T | PANX2    | pannexin 2                                                                  | CCDS14085.2    | chr22_50617600-50617600_G_A   | 643R>H  | Substitution | Nonsynonymous coding | 45% |
| MM12T | PANX3    | pannexin 3                                                                  | CCDS8447.1     | chr11_124487203-124487203_C_T | 120L>F  | Substitution | Nonsynonymous coding | 22% |
| MM12T | PAPD5    | PAP associated domain containing 5                                          | NM_001040284   | chr16_50263102-50263102_T_G   | 654F>V  | Substitution | Nonsynonymous coding | 35% |
| MM12T | PAPLN    | papilin, proteoglycan-like sulfated glycoprotein                            | CCDS32114.1    | chr14_73718368-73718368_G_A   | ISV-4>  | Substitution | Splice site acceptor | 28% |
| MM12T | PAPPA    | pregnancy-associated plasma protein A, pappalysin 1                         | CCDS6813.1     | chr9_118950086-118950086_G_A  | 357V>M  | Substitution | Nonsynonymous coding | 10% |
| MM12T | PAPPA    | pregnancy-associated plasma protein A, pappalysin 1                         | CCDS6813.1     | chr9_119115098-119115098_G_A  | 1360A>T | Substitution | Nonsynonymous coding | 12% |
| MM12T | PAPPA2   | pappalysin 2                                                                | CCDS41438.1    | chr1_176526239-176526239_C_T  | 261P>S  | Substitution | Nonsynonymous coding | 31% |
| MM12T | PAPPA2   | pappalysin 2                                                                | CCDS41438.1    | chr1_176668479-176668479_G_A  | 997G>D  | Substitution | Nonsynonymous coding | 31% |
| MM12T | PAQR4    | progesterone and adipoQ receptor family member IV                           | CCDS10485.1    | chr16_3021605-3021605_G_A     | 160A>T  | Substitution | Nonsynonymous coding | 35% |
| MM12T | PAQR7    | progesterone and adipoQ receptor family member VII                          | CCDS267.1      | chr1_26189660-26189660_C_T    | 224R>H  | Substitution | Nonsynonymous coding | 30% |
| MM12T | PAQR8    | progesterone and adipoQ receptor family member VIII                         | CCDS4941.1     | chr6_52268021-52268021_G_A    | 4A>T    | Substitution | Nonsynonymous coding | 59% |
| MM12T | PARD3B   | par-3 partitioning defective 3 homolog B (C. elegans)                       | CCDS42806.1    | chr2_205990379-205990379_C_T  | 451A>V  | Substitution | Nonsynonymous coding | 10% |
| MM12T | PARD6B   | par-6 partitioning defective 6 homolog beta (C. elegans)                    | CCDS33485.1    | chr20_49366904-49366904_G_A   | 333G>D  | Substitution | Nonsynonymous coding | 33% |

|       |         |                                                                               |             |                              |         |              |                      |     |
|-------|---------|-------------------------------------------------------------------------------|-------------|------------------------------|---------|--------------|----------------------|-----|
| MM12T | PARN    | poly(A)-specific ribonuclease                                                 | CCDS45419.1 | chr16_14540748-14540748_C_T  | 621A>T  | Substitution | Nonsynonymous coding | 26% |
| MM12T | PARP1   | poly (ADP-ribose) polymerase 1                                                | CCDS1554.1  | chr1_226556021-226556021_G_A | 719A>V  | Substitution | Nonsynonymous coding | 29% |
| MM12T | PARP10  | poly (ADP-ribose) polymerase family, member 10 [Source:HGNC Symbol;Acc:25895] | CCDS34960.1 | chr8_145058803-145058803_C_T | 456R>H  | Substitution | Nonsynonymous coding | 30% |
| MM12T | PARP10  | poly (ADP-ribose) polymerase family, member 10 [Source:HGNC Symbol;Acc:25895] | CCDS34960.1 | chr8_145060056-145060056_C_T | 90R>H   | Substitution | Nonsynonymous coding | 15% |
| MM12T | PARP14  | poly (ADP-ribose) polymerase family, member 14                                | CCDS46894.1 | chr3_122418394-122418394_G_A | 331W>X  | Substitution | Nonsense             | 12% |
| MM12T | PARP6   | poly (ADP-ribose) polymerase family, member 6                                 | CCDS10241.2 | chr15_72545777-72545777_C_T  | ISV+1>  | Substitution | Splice site donor    | 19% |
| MM12T | PARP9   | poly (ADP-ribose) polymerase family, member 9                                 | CCDS3014.1  | chr3_122274536-122274536_G_T | 196A>D  | Substitution | Nonsynonymous coding | 28% |
| MM12T | PARP9   | poly (ADP-ribose) polymerase family, member 9                                 | CCDS3014.1  | chr3_122277287-122277287_T_G | 15K>Q   | Substitution | Nonsynonymous coding | 29% |
| MM12T | PARVG   | parvin, gamma                                                                 | CCDS14057.1 | chr22_44583716-44583716_G_T  | 69E>X   | Substitution | Nonsense             | 25% |
| MM12T | PASK    | PAS domain containing serine/threonine kinase                                 | CCDS2545.1  | chr2_242076585-242076585_G_A | 324A>V  | Substitution | Nonsynonymous coding | 15% |
| MM12T | PATL1   | protein associated with topoisomerase II homolog 1 (yeast)                    | CCDS44613.1 | chr11_59425058-59425058_G_T  | 189A>D  | Substitution | Nonsynonymous coding | 50% |
| MM12T | PAX1    | paired box 1                                                                  | CCDS13146.2 | chr20_21687487-21687487_C_T  | 233P>L  | Substitution | Nonsynonymous coding | 27% |
| MM12T | PBRM1   | polybromo 1                                                                   | CCDS2859.1  | chr3_52713694-52713694_A_G   | 12S>P   | Substitution | Nonsynonymous coding | 28% |
| MM12T | PBRM1   | polybromo 1                                                                   | CCDS2859.1  | chr3_52651532-52651532_G_A   | 490R>X  | Substitution | Nonsense             | 13% |
| MM12T | PC      | pyruvate carboxylase                                                          | CCDS8152.1  | chr11_66616447-66616447_C_T  | 1154E>K | Substitution | Nonsynonymous coding | 27% |
| MM12T | PC      | pyruvate carboxylase                                                          | CCDS8152.1  | chr11_66617918-66617918_C_T  | 831V>M  | Substitution | Nonsynonymous coding | 25% |
| MM12T | PC      | pyruvate carboxylase                                                          | CCDS8152.1  | chr11_66617920-66617920_C_T  | 830R>H  | Substitution | Nonsynonymous coding | 14% |
| MM12T | PC      | pyruvate carboxylase                                                          | CCDS8152.1  | chr11_66638318-66638318_C_T  | 227A>T  | Substitution | Nonsynonymous coding | 28% |
| MM12T | PCDH1   | protocadherin 1                                                               | CCDS4267.1  | chr5_141233995-141233995_C_T | 1109R>H | Substitution | Nonsynonymous coding | 50% |
| MM12T | PCDH1   | protocadherin 1                                                               | CCDS4267.1  | chr5_141248454-141248454_G_A | 195R>C  | Substitution | Nonsynonymous coding | 15% |
| MM12T | PCDH10  | protocadherin 10                                                              | CCDS34063.1 | chr4_134071536-134071536_C_A | 81R>S   | Substitution | Nonsynonymous coding | 40% |
| MM12T | PCDH11X | protocadherin 11 X-linked                                                     | CCDS14461.1 | chrX_91090574-91090574_A_G   | 24Q>R   | Substitution | Nonsynonymous coding | 25% |
| MM12T | PCDH12  | protocadherin 12                                                              | CCDS4269.1  | chr5_141325089-141325089_G_A | 1138R>W | Substitution | Nonsynonymous coding | 29% |
| MM12T | PCDH12  | protocadherin 12                                                              | CCDS4269.1  | chr5_141335012-141335012_G_A | 802A>V  | Substitution | Nonsynonymous coding | 28% |
| MM12T | PCDH12  | protocadherin 12                                                              | CCDS4269.1  | chr5_141336975-141336975_C_T | 148A>T  | Substitution | Nonsynonymous coding | 28% |
| MM12T | PCDH18  | protocadherin 18                                                              | CCDS34064.1 | chr4_138442520-138442520_G_A | 1024S>F | Substitution | Nonsynonymous coding | 36% |
| MM12T | PCDH18  | protocadherin 18                                                              | CCDS34064.1 | chr4_138452728-138452728_T_C | 172H>R  | Substitution | Nonsynonymous coding | 46% |
| MM12T | PCDH19  | protocadherin 19                                                              | CCDS43976.1 | chrX_99661749-99661749_T_C   | 616E>G  | Substitution | Nonsynonymous coding | 30% |
| MM12T | PCDH19  | protocadherin 19                                                              | CCDS43976.1 | chrX_99661860-99661860_C_T   | 579R>H  | Substitution | Nonsynonymous coding | 15% |
| MM12T | PCDH19  | protocadherin 19                                                              | CCDS43976.1 | chrX_99661984-99661984_C_T   | 538G>S  | Substitution | Nonsynonymous coding | 12% |
| MM12T | PCDH19  | protocadherin 19                                                              | CCDS43976.1 | chrX_99663111-99663111_C_T   | 162G>D  | Substitution | Nonsynonymous coding | 12% |
| MM12T | PCDH7   | protocadherin 7                                                               | CCDS43220.1 | chr4_30724965-30724965_C_T   | 594Q>X  | Substitution | Nonsense             | 40% |



|       |          |                                                                              |             |                              |         |              |                      |     |
|-------|----------|------------------------------------------------------------------------------|-------------|------------------------------|---------|--------------|----------------------|-----|
| MM12T | PCDHA1   | protocadherin alpha 1                                                        | CCDS34246.1 | chr5_140166977-140166977_G_A | 368V>I  | Substitution | Nonsynonymous coding | 26% |
| MM12T | PCDHA12  | protocadherin alpha 12                                                       | CCDS47285.1 | chr5_140256757-140256757_C_T | 567A>V  | Substitution | Nonsynonymous coding | 42% |
| MM12T | PCDHA4   | protocadherin alpha 4                                                        | CCDS34249.1 | chr5_140189083-140189083_G_A | 771A>T  | Substitution | Nonsynonymous coding | 34% |
| MM12T | PCDHA5   | protocadherin alpha 5                                                        | CCDS34250.1 | chr5_140202504-140202504_G_A | 382G>R  | Substitution | Nonsynonymous coding | 30% |
| MM12T | PCDHA6   | protocadherin alpha 6                                                        | CCDS34255.1 | chr5_140236345-140236345_G_A | 238A>T  | Substitution | Nonsynonymous coding | 30% |
| MM12T | PCDHA6   | protocadherin alpha 6                                                        | CCDS4240.1  | chr5_140262845-140262845_C_T | 331A>V  | Substitution | Nonsynonymous coding | 15% |
| MM12T | PCDHA6   | protocadherin alpha 6                                                        | CCDS4240.1  | chr5_140264045-140264045_C_T | 731A>V  | Substitution | Nonsynonymous coding | 13% |
| MM12T | PCDHA6   | protocadherin alpha 6                                                        | CCDS4242.1  | chr5_140346677-140346677_C_T | 109A>V  | Substitution | Nonsynonymous coding | 13% |
| MM12T | PCDHA6   | protocadherin alpha 6                                                        | CCDS4242.1  | chr5_140347709-140347709_G_A | 453R>H  | Substitution | Nonsynonymous coding | 11% |
| MM12T | PCDHA7   | protocadherin alpha 7                                                        | CCDS34252.1 | chr5_140216159-140216159_G_A | 731A>T  | Substitution | Nonsynonymous coding | 31% |
| MM12T | PCDHB1   | protocadherin beta 1                                                         | CCDS4243.1  | chr5_140432615-140432615_G_T | 520M>I  | Substitution | Nonsynonymous coding | 30% |
| MM12T | PCDHB13  | protocadherin beta 13                                                        | CCDS4255.1  | chr5_140594897-140594897_A_G | 401Y>C  | Substitution | Nonsynonymous coding | 12% |
| MM12T | PCDHB15  | protocadherin beta 15                                                        | CCDS4257.1  | chr5_140625528-140625528_G_A | 128D>N  | Substitution | Nonsynonymous coding | 11% |
| MM12T | PCDHB15  | protocadherin beta 15                                                        | CCDS4257.1  | chr5_140625880-140625880_C_T | 245A>V  | Substitution | Nonsynonymous coding | 33% |
| MM12T | PCDHB16  | protocadherin beta 16                                                        | CCDS4251.1  | chr5_140562237-140562237_G_A | 35V>I   | Substitution | Nonsynonymous coding | 28% |
| MM12T | PCDHB4   | protocadherin beta 4                                                         | CCDS4246.1  | chr5_140502512-140502512_T_A | 311I>N  | Substitution | Nonsynonymous coding | 33% |
| MM12T | PCDHGA10 | protocadherin gamma subfamily A, 10                                          | CCDS47292.1 | chr5_140793371-140793371_C_A | 210A>D  | Substitution | Nonsynonymous coding | 12% |
| MM12T | PCDHGA2  | protocadherin gamma subfamily A, 2                                           | CCDS4260.1  | chr5_140810619-140810619_G_A | 98G>E   | Substitution | Nonsynonymous coding | 10% |
| MM12T | PCDHGA8  | protocadherin gamma subfamily A, 8                                           | CCDS47291.1 | chr5_140774001-140774001_C_T | 541P>S  | Substitution | Nonsynonymous coding | 28% |
| MM12T | PCDHGB1  | protocadherin gamma subfamily B, 1                                           | NM_018922   | chr5_140730125-140730125_G_A | 100A>T  | Substitution | Nonsynonymous coding | 30% |
| MM12T | PCED1B   | PC-esterase domain containing 1B                                             | CCDS8752.1  | chr12_47629403-47629403_C_T  | 186A>V  | Substitution | Nonsynonymous coding | 30% |
| MM12T | PCF11    | PCF11, cleavage and polyadenylation factor subunit, homolog (S. cerevisiae)  | CCDS44689.1 | chr11_82879847-82879847_C_T  | 824P>S  | Substitution | Nonsynonymous coding | 13% |
| MM12T | PCIF1    | PDX1 C-terminal inhibiting factor 1                                          | CCDS13388.1 | chr20_44571766-44571766_G_A  | 235R>H  | Substitution | Nonsynonymous coding | 28% |
| MM12T | PCMTD2   | protein-L-isoaspartate (D-aspartate) O-methyltransferase domain containing 2 | CCDS13559.1 | chr20_62891433-62891433_G_A  | 39A>T   | Substitution | Nonsynonymous coding | 11% |
| MM12T | PCNT     | pericentrin                                                                  | CCDS33592.1 | chr21_47766688-47766688_G_A  | 251R>H  | Substitution | Nonsynonymous coding | 17% |
| MM12T | PCNXL2   | pecanex-like 2 (Drosophila)                                                  | CCDS44335.1 | chr1_233275511-233275511_G_A | 1203A>V | Substitution | Nonsynonymous coding | 22% |
| MM12T | PCNXL2   | pecanex-like 2 (Drosophila)                                                  | CCDS44335.1 | chr1_233297019-233297019_G_A | 1122R>X | Substitution | Nonsense             | 11% |
| MM12T | PCP2     | Purkinje cell protein 2                                                      | CCDS32893.1 | chr19_7697325-7697325_C_T    | 82R>H   | Substitution | Nonsynonymous coding | 37% |
| MM12T | PCSK1    | proprotein convertase subtilisin/kexin type 1                                | CCDS4081.1  | chr5_95757618-95757618_G_A   | 196P>S  | Substitution | Nonsynonymous coding | 33% |
| MM12T | PCSK2    | proprotein convertase subtilisin/kexin type 2                                | CCDS13125.1 | chr20_17462633-17462633_C_T  | 612A>V  | Substitution | Nonsynonymous coding | 39% |
| MM12T | PCYT1B   | phosphate cytidylyltransferase 1, choline, beta                              | CCDS14213.1 | chrX_24625946-24625946_T_G   | 84I>L   | Substitution | Nonsynonymous coding | 30% |
| MM12T | PDCD1    | programmed cell death 1                                                      | CCDS33428.1 | chr2_242794496-242794496_G_A | 149A>V  | Substitution | Nonsynonymous coding | 10% |

|       |         |                                                                    |             |                               |         |              |                      |     |
|-------|---------|--------------------------------------------------------------------|-------------|-------------------------------|---------|--------------|----------------------|-----|
| MM12T | PDE10A  | phosphodiesterase 10A                                              | CCDS47513.1 | chr6_165809932-165809932_C_T  | 432R>H  | Substitution | Nonsynonymous coding | 45% |
| MM12T | PDE1A   | phosphodiesterase 1A, calmodulin-dependent                         | CCDS2285.1  | chr2_183387076-183387076_C_T  | 10E>K   | Substitution | Nonsynonymous coding | 11% |
| MM12T | PDE4B   | phosphodiesterase 4B, cAMP-specific                                | CCDS632.1   | chr1_66833662-66833662_C_A    | 526L>M  | Substitution | Nonsynonymous coding | 23% |
| MM12T | PDE4DIP | phosphodiesterase 4D interacting protein                           | CCDS30824.1 | chr1_144866642-144866642_C_T  | 1867R>H | Substitution | Nonsynonymous coding | 12% |
| MM12T | PDE4DIP | phosphodiesterase 4D interacting protein                           | CCDS30824.1 | chr1_144922015-144922015_C_A  | 338Q>H  | Substitution | Nonsynonymous coding | 13% |
| MM12T | PDE5A   | phosphodiesterase 5A, cGMP-specific                                | CCDS3713.1  | chr4_120422375-120422375_G_A  | 814P>S  | Substitution | Nonsynonymous coding | 11% |
| MM12T | PDE6A   | phosphodiesterase 6A, cGMP-specific, rod, alpha                    | CCDS4299.1  | chr5_149264055-149264055_C_T  | 672A>T  | Substitution | Nonsynonymous coding | 33% |
| MM12T | PDE6B   | phosphodiesterase 6B, cGMP-specific, rod, beta                     | CCDS33932.1 | chr4_647722-647722_C_T        | 265R>W  | Substitution | Nonsynonymous coding | 11% |
| MM12T | PDE7B   | phosphodiesterase 7B                                               | CCDS5175.1  | chr6_136512931-136512931_G_A  | 436A>T  | Substitution | Nonsynonymous coding | 28% |
| MM12T | PDE9A   | phosphodiesterase 9A                                               | CCDS13690.1 | chr21_44180951-44180951_C_T   | 340T>M  | Substitution | Nonsynonymous coding | 39% |
| MM12T | PDGFRB  | platelet-derived growth factor receptor, beta polypeptide          | CCDS4303.1  | chr5_149513527-149513527_G_A  | 226R>C  | Substitution | Nonsynonymous coding | 29% |
| MM12T | PDHA1   | pyruvate dehydrogenase (lipoamide) alpha 1                         | CCDS14192.1 | chrX_19373555-19373555_C_T    | 231T>M  | Substitution | Nonsynonymous coding | 28% |
| MM12T | PDHA2   | pyruvate dehydrogenase (lipoamide) alpha 2                         | CCDS3644.1  | chr4_96762303-96762303_G_T    | 334K>N  | Substitution | Nonsynonymous coding | 22% |
| MM12T | PDIA2   | protein disulfide isomerase family A, member 2                     | CCDS42089.1 | chr16_335175-335175_G_A       | 257R>H  | Substitution | Nonsynonymous coding | 33% |
| MM12T | PDIA3   | protein disulfide isomerase family A, member 3                     | CCDS10101.1 | chr15_44062751-44062751_C_G   | 459N>K  | Substitution | Nonsynonymous coding | 10% |
| MM12T | PDIA4   | protein disulfide isomerase family A, member 4                     | CCDS5893.1  | chr7_148709258-148709258_C_T  | 270R>Q  | Substitution | Nonsynonymous coding | 36% |
| MM12T | PDIA4   | protein disulfide isomerase family A, member 4                     | CCDS5893.1  | chr7_148709292-148709292_G_A  | 259R>C  | Substitution | Nonsynonymous coding | 12% |
| MM12T | PDILT   | protein disulfide isomerase-like, testis expressed                 | CCDS10584.1 | chr16_20387410-20387410_C_T   | 175V>I  | Substitution | Nonsynonymous coding | 12% |
| MM12T | PDLIM5  | PDZ and LIM domain 5                                               | CCDS3641.1  | chr4_95561579-95561579_G_A    | 421A>T  | Substitution | Nonsynonymous coding | 37% |
| MM12T | PDPN    | podoplanin                                                         | CCDS30602.1 | chr1_13933722-13933722_T_C    | 117V>A  | Substitution | Nonsynonymous coding | 14% |
| MM12T | PDPR    | pyruvate dehydrogenase phosphatase regulatory subunit              | CCDS45520.1 | chr16_70190685-70190685_G_A   | 848R>H  | Substitution | Nonsynonymous coding | 11% |
| MM12T | PDRG1   | p53 and DNA-damage regulated 1                                     | CCDS13194.1 | chr20_30534344-30534344_G_A   | 92R>W   | Substitution | Nonsynonymous coding | 31% |
| MM12T | PDS5A   | PDS5, regulator of cohesion maintenance, homolog A (S. cerevisiae) | CCDS47045.1 | chr4_39929664-39929664_G_A    | 87R>C   | Substitution | Nonsynonymous coding | 10% |
| MM12T | PDS5B   | PDS5, regulator of cohesion maintenance, homolog B (S. cerevisiae) | CCDS41878.1 | chr13_33233388-33233388_G_A   | 199V>I  | Substitution | Nonsynonymous coding | 31% |
| MM12T | PDS5B   | PDS5, regulator of cohesion maintenance, homolog B (S. cerevisiae) | CCDS41878.1 | chr13_33327528-33327528_G_A   | 932R>H  | Substitution | Nonsynonymous coding | 36% |
| MM12T | PDS5B   | PDS5, regulator of cohesion maintenance, homolog B (S. cerevisiae) | CCDS41878.1 | chr13_33334791-33334791_C_T   | 1151R>X | Substitution | Nonsense             | 34% |
| MM12T | PDS52   | prenyl (decaprenyl) diphosphate synthase, subunit 2                | CCDS5059.1  | chr6_107533420-107533420_C_T  | 257A>T  | Substitution | Nonsynonymous coding | 47% |
| MM12T | PDZD2   | PDZ domain containing 2                                            | CCDS34137.1 | chr5_32089802-32089802_G_A    | 2083R>H | Substitution | Nonsynonymous coding | 12% |
| MM12T | PDZD4   | PDZ domain containing 4                                            | CCDS14732.1 | chrX_153069544-153069544_G_A  | 525A>V  | Substitution | Nonsynonymous coding | 37% |
| MM12T | PDZD4   | PDZ domain containing 4                                            | CCDS14732.1 | chrX_153072751-153072751_C_T  | 124D>N  | Substitution | Nonsynonymous coding | 27% |
| MM12T | PDZD7   | PDZ domain containing 7                                            | CCDS31269.1 | chr10_102783715-102783715_C_T | 113V>I  | Substitution | Nonsynonymous coding | 31% |
| MM12T | PEAR1   | platelet endothelial aggregation receptor 1                        | CCDS30892.1 | chr1_156878608-156878608_C_T  | 426A>V  | Substitution | Nonsynonymous coding | 26% |

|       |         |                                                       |             |                              |        |              |                      |     |
|-------|---------|-------------------------------------------------------|-------------|------------------------------|--------|--------------|----------------------|-----|
| MM12T | PEG3    | paternally expressed 3                                | CCDS33123.1 | chr19_57286891-57286891_G_T  | 250S>Y | Substitution | Nonsynonymous coding | 60% |
| MM12T | PELI1   | pellino E3 ubiquitin protein ligase 1                 | CCDS1876.1  | chr2_64321886-64321886_C_T   | 403A>T | Substitution | Nonsynonymous coding | 14% |
| MM12T | PEPD    | peptidase D                                           | CCDS42544.1 | chr19_33892638-33892638_G_A  | 319A>V | Substitution | Nonsynonymous coding | 38% |
| MM12T | PER2    | period circadian clock 2                              | CCDS2528.1  | chr2_239180144-239180144_G_A | 194A>V | Substitution | Nonsynonymous coding | 16% |
| MM12T | PER3    | period circadian clock 3                              | CCDS89.1    | chr1_7845620-7845620_C_T     | 83A>V  | Substitution | Nonsynonymous coding | 43% |
| MM12T | PET112  | PET112 homolog (yeast)                                | CCDS3776.1  | chr4_152638096-152638096_T_C | 191E>G | Substitution | Nonsynonymous coding | 39% |
| MM12T | PEX14   | peroxisomal biogenesis factor 14                      | CCDS30582.1 | chr1_10684484-10684484_C_T   | 192A>V | Substitution | Nonsynonymous coding | 32% |
| MM12T | PEX5L   | peroxisomal biogenesis factor 5-like                  | CCDS3236.1  | chr3_179615979-179615979_G_A | 50P>L  | Substitution | Nonsynonymous coding | 28% |
| MM12T | PFAS    | phosphoribosylformylglycinamide synthase              | CCDS11136.1 | chr17_8160195-8160195_G_A    | 330R>Q | Substitution | Nonsynonymous coding | 16% |
| MM12T | PFDN5   | prefoldin subunit 5                                   | CCDS8853.1  | chr12_53691931-53691931_C_T  | 129Q>X | Substitution | Nonsense             | 16% |
| MM12T | PFKFB2  | 6-phosphofructo-2-kinase/fructose-2,6-biphosphatase 2 | CCDS31004.1 | chr1_207235986-207235986_G_A | 78R>Q  | Substitution | Nonsynonymous coding | 26% |
| MM12T | PFKL    | phosphofructokinase, liver                            | CCDS33582.1 | chr21_45739268-45739268_G_T  | 366R>M | Substitution | Nonsynonymous coding | 28% |
| MM12T | PFKL    | phosphofructokinase, liver                            | CCDS33582.1 | chr21_45741670-45741670_C_T  | 417A>V | Substitution | Nonsynonymous coding | 13% |
| MM12T | PFKL    | phosphofructokinase, liver                            | CCDS33582.1 | chr21_45745122-45745122_C_T  | 655T>I | Substitution | Nonsynonymous coding | 31% |
| MM12T | PFN3    | profilin 3                                            | CCDS34301.1 | chr5_176827169-176827169_C_T | 137A>T | Substitution | Nonsynonymous coding | 18% |
| MM12T | PGBD2   | piggyBac transposable element derived 2               | CCDS31128.1 | chr1_249211572-249211572_A_C | 263E>D | Substitution | Nonsynonymous coding | 32% |
| MM12T | PGBD5   | piggyBac transposable element derived 5               | CCDS1583.1  | chr1_230493051-230493051_C_T | 146M>I | Substitution | Nonsynonymous coding | 16% |
| MM12T | PGLS    | 6-phosphogluconolactonase                             | CCDS12361.1 | chr19_17631792-17631792_G_A  | 227A>T | Substitution | Nonsynonymous coding | 21% |
| MM12T | PGLYRP3 | peptidoglycan recognition protein 3                   | CCDS1035.1  | chr1_153277444-153277444_C_T | 119A>T | Substitution | Nonsynonymous coding | 24% |
| MM12T | PGM2    | phosphoglucomutase 2                                  | CCDS3443.1  | chr4_37831590-37831590_C_T   | 29S>F  | Substitution | Nonsynonymous coding | 19% |
| MM12T | PGS1    | phosphatidylglycerophosphate synthase 1               | CCDS42391.1 | chr17_76396795-76396795_G_T  | 247D>Y | Substitution | Nonsynonymous coding | 33% |
| MM12T | PHACTR1 | phosphatase and actin regulator 1                     | NM_030948   | chr6_13283703-13283703_T_C   | 520I>T | Substitution | Nonsynonymous coding | 30% |
| MM12T | PHACTR3 | phosphatase and actin regulator 3                     | CCDS13480.1 | chr20_58322834-58322834_G_T  | 101G>V | Substitution | Nonsynonymous coding | 14% |
| MM12T | PHEX    | phosphate regulating endopeptidase homolog, X-linked  | CCDS14204.1 | chrX_22117199-22117199_G_A   | 337E>K | Substitution | Nonsynonymous coding | 11% |
| MM12T | PHF13   | PHD finger protein 13                                 | CCDS85.1    | chr1_6676856-6676856_G_T     | 27D>Y  | Substitution | Nonsynonymous coding | 13% |
| MM12T | PHF17   | PHD finger protein 17                                 | CCDS34062.1 | chr4_129792734-129792734_G_T | 616D>Y | Substitution | Nonsynonymous coding | 12% |
| MM12T | PHF2    | PHD finger protein 2                                  | CCDS35069.1 | chr9_96422493-96422493_G_A   | 450R>Q | Substitution | Nonsynonymous coding | 31% |
| MM12T | PHF20L1 | PHD finger protein 20-like 1                          | CCDS6367.2  | chr8_133816947-133816947_C_T | 270S>L | Substitution | Nonsynonymous coding | 35% |
| MM12T | PHF21A  | PHD finger protein 21A                                | CCDS44578.1 | chr11_45992798-45992798_C_T  | 161A>T | Substitution | Nonsynonymous coding | 27% |
| MM12T | PHF21B  | PHD finger protein 21B                                | CCDS14061.1 | chr22_45279115-45279115_G_A  | 483R>W | Substitution | Nonsynonymous coding | 13% |
| MM12T | PHF8    | PHD finger protein 8                                  | CCDS14355.1 | chrX_54013548-54013548_C_T   | 653R>Q | Substitution | Nonsynonymous coding | 22% |
| MM12T | PHGDH   | phosphoglycerate dehydrogenase                        | CCDS904.1   | chr1_120285647-120285647_C_T | 476A>V | Substitution | Nonsynonymous coding | 25% |

|       |         |                                                                           |              |                              |         |              |                      |     |
|-------|---------|---------------------------------------------------------------------------|--------------|------------------------------|---------|--------------|----------------------|-----|
| MM12T | PHIP    | pleckstrin homology domain interacting protein                            | CCDS4987.1   | chr6_79727258-79727258_C_T   | 346R>Q  | Substitution | Nonsynonymous coding | 14% |
| MM12T | PHLDB3  | pleckstrin homology-like domain, family B, member 3                       | CCDS12621.2  | chr19_44001926-44001926_C_T  | 213E>K  | Substitution | Nonsynonymous coding | 28% |
| MM12T | PHLDB3  | pleckstrin homology-like domain, family B, member 3                       | CCDS12621.2  | chr19_44006027-44006027_C_T  | ISV-4>  | Substitution | Splice site acceptor | 13% |
| MM12T | PHTF1   | putative homeodomain transcription factor 1                               | CCDS861.1    | chr1_114248697-114248697_G_A | 496L>F  | Substitution | Nonsynonymous coding | 26% |
| MM12T | PHYH    | phytanoyl-CoA 2-hydroxylase                                               | CCDS7097.1   | chr10_13320332-13320332_C_T  | 329R>Q  | Substitution | Nonsynonymous coding | 23% |
| MM12T | PHYHD1  | phytanoyl-CoA dioxygenase domain containing 1                             | CCDS6914.1   | chr9_131702694-131702694_C_T | 161A>V  | Substitution | Nonsynonymous coding | 12% |
| MM12T | PI4K2A  | phosphatidylinositol 4-kinase type 2 alpha                                | CCDS7467.1   | chr10_99359876-99359876_T_C  | 219V>A  | Substitution | Nonsynonymous coding | 33% |
| MM12T | PIBF1   | progesterone immunomodulatory binding factor 1                            | CCDS31991.1  | chr13_73409509-73409509_A_   | NA      | Deletion     | Splice site donor    | 19% |
| MM12T | PIDD    | p53-induced death domain protein                                          | CCDS7716.1   | chr11_800377-800377_C_T      | 706V>M  | Substitution | Nonsynonymous coding | 12% |
| MM12T | PIEZO1  | piezo-type mechanosensitive ion channel component 1                       | NM_001142864 | chr16_88782461-88782461_C_T  | 2399G>D | Substitution | Nonsynonymous coding | 32% |
| MM12T | PIEZO1  | piezo-type mechanosensitive ion channel component 1                       | NM_001142864 | chr16_88787640-88787640_G_A  | 1868R>C | Substitution | Nonsynonymous coding | 25% |
| MM12T | PIEZO1  | piezo-type mechanosensitive ion channel component 1                       | NM_001142864 | chr16_88799092-88799092_G_T  | 905L>M  | Substitution | Nonsynonymous coding | 23% |
| MM12T | PIF1    | PIF1 5'-to-3' DNA helicase homolog (S. cerevisiae)                        | CCDS10195.2  | chr15_65112130-65112130_G_A  | 417R>X  | Substitution | Nonsense             | 23% |
| MM12T | PIGO    | phosphatidylinositol glycan anchor biosynthesis, class O                  | CCDS6575.1   | chr9_35095305-35095305_C_A   | 86Q>H   | Substitution | Nonsynonymous coding | 29% |
| MM12T | PIGS    | phosphatidylinositol glycan anchor biosynthesis, class S                  | CCDS11235.1  | chr17_26885574-26885574_C_T  | 285R>H  | Substitution | Nonsynonymous coding | 30% |
| MM12T | PIGT    | phosphatidylinositol glycan anchor biosynthesis, class T                  | CCDS13353.1  | chr20_44054210-44054210_C_T  | ISV-4>  | Substitution | Splice site acceptor | 50% |
| MM12T | PIK3AP1 | phosphoinositide-3-kinase adaptor protein 1                               | CCDS31259.1  | chr10_98405263-98405263_C_T  | 448A>T  | Substitution | Nonsynonymous coding | 35% |
| MM12T | PIK3C2A | phosphatidylinositol-4-phosphate 3-kinase, catalytic subunit type 2 alpha | CCDS7824.1   | chr11_17113176-17113176_C_T  | 1557G>D | Substitution | Nonsynonymous coding | 17% |
| MM12T | PIK3C2A | phosphatidylinositol-4-phosphate 3-kinase, catalytic subunit type 2 alpha | CCDS7824.1   | chr11_17118815-17118815_C_A  | ISV-4>  | Substitution | Splice site acceptor | 13% |
| MM12T | PIK3C2B | phosphatidylinositol-4-phosphate 3-kinase, catalytic subunit type 2 beta  | CCDS1446.1   | chr1_204434384-204434384_C_A | 333D>Y  | Substitution | Nonsynonymous coding | 25% |
| MM12T | PIK3C2G | phosphatidylinositol-4-phosphate 3-kinase, catalytic subunit type 2 gamma | CCDS44839.1  | chr12_18435082-18435082_G_A  | 23E>K   | Substitution | Nonsynonymous coding | 11% |
| MM12T | PIK3C2G | phosphatidylinositol-4-phosphate 3-kinase, catalytic subunit type 2 gamma | CCDS44839.1  | chr12_18716329-18716329_A_G  | 1226T>A | Substitution | Nonsynonymous coding | 24% |
| MM12T | PIK3C3  | phosphatidylinositol 3-kinase, catalytic subunit type 3                   | CCDS11920.1  | chr18_39609380-39609380_G_A  | 561R>H  | Substitution | Nonsynonymous coding | 15% |
| MM12T | PIK3CA  | phosphatidylinositol-4,5-bisphosphate 3-kinase, catalytic subunit alpha   | CCDS43171.1  | chr3_178936082-178936082_G_A | 542E>K  | Substitution | Nonsynonymous coding | 30% |
| MM12T | PIK3CD  | phosphatidylinositol-4,5-bisphosphate 3-kinase, catalytic subunit delta   | CCDS104.1    | chr1_9776550-9776550_C_T     | 218A>V  | Substitution | Nonsynonymous coding | 15% |
| MM12T | PIK3CD  | phosphatidylinositol-4,5-bisphosphate 3-kinase, catalytic subunit delta   | CCDS104.1    | chr1_9783298-9783298_G_A     | 848A>T  | Substitution | Nonsynonymous coding | 37% |
| MM12T | PIK3CG  | phosphatidylinositol-4,5-bisphosphate 3-kinase, catalytic subunit gamma   | CCDS5739.1   | chr7_106508746-106508746_G_A | 247S>N  | Substitution | Nonsynonymous coding | 11% |
| MM12T | PIK3CG  | phosphatidylinositol-4,5-bisphosphate 3-kinase, catalytic subunit gamma   | CCDS5739.1   | chr7_106509676-106509676_C_T | 557A>V  | Substitution | Nonsynonymous coding | 15% |
| MM12T | PIK3R2  | phosphoinositide-3-kinase, regulatory subunit 2 (beta)                    | CCDS12371.1  | chr19_18266771-18266771_G_A  | 28G>S   | Substitution | Nonsynonymous coding | 27% |
| MM12T | PIK3R4  | phosphoinositide-3-kinase, regulatory subunit 4                           | CCDS3067.1   | chr3_130463686-130463686_C_T | 126R>H  | Substitution | Nonsynonymous coding | 32% |
| MM12T | PIK3R5  | phosphoinositide-3-kinase, regulatory subunit 5                           | CCDS11147.1  | chr17_8791666-8791666_G_A    | 480P>S  | Substitution | Nonsynonymous coding | 28% |
| MM12T | PINK1   | PTEN induced putative kinase 1                                            | CCDS211.1    | chr1_20975543-20975543_C_T   | 436A>V  | Substitution | Nonsynonymous coding | 13% |

|       |         |                                                                                                                                                    |                 |                               |         |              |                      |     |
|-------|---------|----------------------------------------------------------------------------------------------------------------------------------------------------|-----------------|-------------------------------|---------|--------------|----------------------|-----|
| MM12T | PIP5K1C | phosphatidylinositol-4-phosphate 5-kinase, type I, gamma                                                                                           | CCDS32872.1     | chr19_3662002-3662002_G_A     | ISV-3>  | Substitution | Splice site acceptor | 43% |
| MM12T | PISD    | phosphatidylserine decarboxylase                                                                                                                   | CCDS13899.1     | chr22_32021777-32021777_G_A   | 9Q>X    | Substitution | Nonsense             | 23% |
| MM12T | PITHD1  | PITH (C-terminal proteasome-interacting domain of thioredoxin-like) domain containing phosphatidylinositol transfer protein, membrane-associated 1 | CCDS240.1       | chr1_24112219-24112219_G_T    | 125Q>H  | Substitution | Nonsynonymous coding | 12% |
| MM12T | PITPNM1 | phosphatidylinositol transfer protein, membrane-associated 1                                                                                       | CCDS31620.1     | chr11_67262552-67262552_C_T   | 876R>H  | Substitution | Nonsynonymous coding | 16% |
| MM12T | PITPNM2 | phosphatidylinositol transfer protein, membrane-associated 2                                                                                       | CCDS9242.1      | chr12_123472783-123472783_G_A | 999R>W  | Substitution | Nonsynonymous coding | 38% |
| MM12T | PITPNM2 | phosphatidylinositol transfer protein, membrane-associated 2                                                                                       | ENST00000280562 | chr12_123476343-123476343_G_A | 836A>V  | Substitution | Nonsynonymous coding | 29% |
| MM12T | PITPNM2 | phosphatidylinositol transfer protein, membrane-associated 2                                                                                       | CCDS9242.1      | chr12_123494476-123494476_C_T | 188M>I  | Substitution | Nonsynonymous coding | 32% |
| MM12T | PIWIL1  | piwi-like 1 (Drosophila)                                                                                                                           | CCDS9268.1      | chr12_130839432-130839432_G_T | ISV-1>  | Substitution | Splice site acceptor | 42% |
| MM12T | PIWIL3  | piwi-like 3 (Drosophila)                                                                                                                           | CCDS33623.1     | chr22_25145702-25145702_G_A   | 392R>C  | Substitution | Nonsynonymous coding | 22% |
| MM12T | PKD1L1  | polycystic kidney disease 1 like 1                                                                                                                 | CCDS34633.1     | chr7_47847859-47847859_C_T    | 2605A>T | Substitution | Nonsynonymous coding | 24% |
| MM12T | PKD1L1  | polycystic kidney disease 1 like 1                                                                                                                 | CCDS34633.1     | chr7_47867033-47867033_G_A    | 2257R>C | Substitution | Nonsynonymous coding | 26% |
| MM12T | PKD1L3  | polycystic kidney disease 1-like 3                                                                                                                 | ENST00000335106 | chr16_71976606-71976606_C_T   | 1392R>H | Substitution | Nonsynonymous coding | 11% |
| MM12T | PKD2L1  | polycystic kidney disease 2-like 1                                                                                                                 | CCDS7492.1      | chr10_102052798-102052798_C_T | 596R>H  | Substitution | Nonsynonymous coding | 16% |
| MM12T | PKDREJ  | polycystic kidney disease (polycystin) and REJ homolog (sperm receptor for egg jelly                                                               | CCDS14073.1     | chr22_46652461-46652463_AAC_  | NA      | Deletion     | In-frame deletion    | 33% |
| MM12T | PKDREJ  | polycystic kidney disease (polycystin) and REJ homolog (sperm receptor for egg jelly                                                               | CCDS14073.1     | chr22_46653320-46653320_A_G   | 1967L>S | Substitution | Nonsynonymous coding | 27% |
| MM12T | PKDREJ  | polycystic kidney disease (polycystin) and REJ homolog (sperm receptor for egg jelly                                                               | CCDS14073.1     | chr22_46655714-46655714_G_T   | 1169P>H | Substitution | Nonsynonymous coding | 21% |
| MM12T | PKHD1   | polycystic kidney and hepatic disease 1 (autosomal recessive)                                                                                      | CCDS4935.1      | chr6_51768489-51768489_A_G    | 2301V>A | Substitution | Nonsynonymous coding | 40% |
| MM12T | PKHD1   | polycystic kidney and hepatic disease 1 (autosomal recessive)                                                                                      | CCDS4935.1      | chr6_51915066-51915066_C_T    | 723R>H  | Substitution | Nonsynonymous coding | 49% |
| MM12T | PKN1    | protein kinase N1                                                                                                                                  | CCDS42514.1     | chr19_14578727-14578727_G_A   | 648A>T  | Substitution | Nonsynonymous coding | 35% |
| MM12T | PKN3    | protein kinase N3                                                                                                                                  | CCDS6908.1      | chr9_131482097-131482097_T_C  | 753L>P  | Substitution | Nonsynonymous coding | 31% |
| MM12T | PKP3    | plakophilin 3                                                                                                                                      | CCDS7695.1      | chr11_399058-399058_C_T       | 379R>C  | Substitution | Nonsynonymous coding | 11% |
| MM12T | PLA2G6  | phospholipase A2, group VI (cytosolic, calcium-independent)                                                                                        | CCDS13967.1     | chr22_38541454-38541454_C_T   | 139R>H  | Substitution | Nonsynonymous coding | 32% |
| MM12T | PLA2R1  | phospholipase A2 receptor 1, 180kDa                                                                                                                | CCDS33309.1     | chr2_160825844-160825844_T_A  | 896Y>F  | Substitution | Nonsynonymous coding | 38% |
| MM12T | PLAT    | plasminogen activator, tissue                                                                                                                      | CCDS6126.1      | chr8_42036494-42036494_C_A    | 484R>I  | Substitution | Nonsynonymous coding | 30% |
| MM12T | PLB1    | phospholipase B1                                                                                                                                   | CCDS33168.1     | chr2_28843808-28843808_G_A    | 1164A>T | Substitution | Nonsynonymous coding | 30% |
| MM12T | PLBD2   | phospholipase B domain containing 2                                                                                                                | CCDS9168.1      | chr12_113812282-113812282_C_T | 183R>W  | Substitution | Nonsynonymous coding | 17% |
| MM12T | PLCB1   | phospholipase C, beta 1 (phosphoinositide-specific)                                                                                                | CCDS13102.1     | chr20_8689399-8689399_C_T     | 417S>F  | Substitution | Nonsynonymous coding | 37% |
| MM12T | PLCB1   | phospholipase C, beta 1 (phosphoinositide-specific)                                                                                                | CCDS13102.1     | chr20_8717805-8717805_C_A     | 725P>H  | Substitution | Nonsynonymous coding | 27% |
| MM12T | PLCB2   | phospholipase C, beta 2                                                                                                                            | CCDS42020.1     | chr15_40582827-40582827_G_A   | 1054R>W | Substitution | Nonsynonymous coding | 32% |
| MM12T | PLCB3   | phospholipase C, beta 3 (phosphatidylinositol-specific)                                                                                            | CCDS8064.1      | chr11_64021917-64021917_C_T   | 44R>C   | Substitution | Nonsynonymous coding | 11% |
| MM12T | PLCB3   | phospholipase C, beta 3 (phosphatidylinositol-specific)                                                                                            | CCDS8064.1      | chr11_64026048-64026048_G_T   | 372E>D  | Substitution | Nonsynonymous coding | 24% |
| MM12T | PLCB3   | phospholipase C, beta 3 (phosphatidylinositol-specific)                                                                                            | CCDS8064.1      | chr11_64026070-64026070_G_A   | 380G>S  | Substitution | Nonsynonymous coding | 12% |

|       |           |                                                                                            |                 |                               |         |              |                      |     |
|-------|-----------|--------------------------------------------------------------------------------------------|-----------------|-------------------------------|---------|--------------|----------------------|-----|
| MM12T | PLCB3     | phospholipase C, beta 3 (phosphatidylinositol-specific)                                    | CCDS8064.1      | chr11_64031499-64031499_C_T   | 856A>V  | Substitution | Nonsynonymous coding | 33% |
| MM12T | PLCB3     | phospholipase C, beta 3 (phosphatidylinositol-specific)                                    | CCDS8064.1      | chr11_64035010-64035010_G_T   | 1229E>D | Substitution | Nonsynonymous coding | 25% |
| MM12T | PLCD1     | phospholipase C, delta 1                                                                   | CCDS46793.1     | chr3_38052939-38052939_G_A    | ISV-3>  | Substitution | Splice site acceptor | 44% |
| MM12T | PLCD3     | phospholipase C, delta 3                                                                   | ENST00000322765 | chr17_43190300-43190300_C_A   | 737D>Y  | Substitution | Nonsynonymous coding | 39% |
| MM12T | PLCD4     | phospholipase C, delta 4                                                                   | CCDS46516.1     | chr2_219480690-219480690_C_T  | 29S>F   | Substitution | Nonsynonymous coding | 17% |
| MM12T | PLCE1     | phospholipase C, epsilon 1                                                                 | CCDS41552.1     | chr10_96066260-96066260_C_A   | 1900P>H | Substitution | Nonsynonymous coding | 31% |
| MM12T | PLCG2     | phospholipase C, gamma 2 (phosphatidylinositol-specific)                                   | CCDS42204.1     | chr16_81942130-81942130_G_A   | 556G>D  | Substitution | Nonsynonymous coding | 12% |
| MM12T | PLCH2     | phospholipase C, eta 2                                                                     | NM_014638       | chr1_2409940-2409940_A_C      | 50Q>H   | Substitution | Nonsynonymous coding | 26% |
| MM12T | PLCH2     | phospholipase C, eta 2                                                                     | ENST00000449969 | chr1_2434146-2434146_C_A      | 1059P>H | Substitution | Nonsynonymous coding | 35% |
| MM12T | PLD1      | phospholipase D1, phosphatidylcholine-specific                                             | CCDS3216.1      | chr3_171455452-171455452_A_   | NA      | Deletion     | Splice site acceptor | 45% |
| MM12T | PLD3      | phospholipase D family, member 3                                                           | CCDS33027.1     | chr19_40872541-40872541_G_A   | 18A>T   | Substitution | Nonsynonymous coding | 17% |
| MM12T | PLD5      | phospholipase D family, member 5                                                           | CCDS1621.1      | chr1_242271010-242271010_G_A  | 309A>V  | Substitution | Nonsynonymous coding | 41% |
| MM12T | PLEC      | plectin                                                                                    | CCDS43772.1     | chr8_144991580-144991580_G_A  | 4274R>C | Substitution | Nonsynonymous coding | 15% |
| MM12T | PLEC      | plectin                                                                                    | CCDS43772.1     | chr8_144992015-144992015_G_A  | 4129R>C | Substitution | Nonsynonymous coding | 34% |
| MM12T | PLEC      | plectin                                                                                    | CCDS43772.1     | chr8_144999828-144999828_C_A  | 1560Q>H | Substitution | Nonsynonymous coding | 30% |
| MM12T | PLEC      | plectin                                                                                    | CCDS43772.1     | chr8_144999940-144999940_G_A  | 1523A>V | Substitution | Nonsynonymous coding | 31% |
| MM12T | PLEC      | plectin                                                                                    | CCDS43772.1     | chr8_145000972-145000972_G_A  | 1479R>W | Substitution | Nonsynonymous coding | 31% |
| MM12T | PLEC      | plectin                                                                                    | CCDS43772.1     | chr8_145004457-145004457_G_A  | 960H>Y  | Substitution | Nonsynonymous coding | 29% |
| MM12T | PLEC      | plectin                                                                                    | CCDS43772.1     | chr8_145004619-145004619_C_T  | 934R>H  | Substitution | Nonsynonymous coding | 26% |
| MM12T | PLEC      | plectin                                                                                    | CCDS43772.1     | chr8_145007212-145007212_C_T  | 633V>M  | Substitution | Nonsynonymous coding | 34% |
| MM12T | PLEKHA1   | pleckstrin homology domain containing, family A (phosphoinositide binding specific) member | CCDS7629.1      | chr10_124159888-124159888_G_T | 76K>N   | Substitution | Nonsynonymous coding | 22% |
| MM12T | PLEKHA1   | pleckstrin homology domain containing, family A (phosphoinositide binding specific) member | CCDS7629.1      | chr10_124189218-124189218_G_T | 327A>S  | Substitution | Nonsynonymous coding | 26% |
| MM12T | PLEKHA4   | pleckstrin homology domain containing, family A (phosphoinositide binding specific) member | CCDS12737.1     | chr19_49362227-49362227_G_A   | 288R>C  | Substitution | Nonsynonymous coding | 26% |
| MM12T | PLEKHA5   | pleckstrin homology domain containing, family A member 5                                   | CCDS8682.1      | chr12_19511352-19511352_A_T   | 944N>I  | Substitution | Nonsynonymous coding | 39% |
| MM12T | PLEKHA5   | pleckstrin homology domain containing, family A member 5                                   | CCDS8682.1      | chr12_19410475-19410476_TT_   | NA      | Deletion     | Splice site donor    | 13% |
| MM12T | PLEKHA6   | pleckstrin homology domain containing, family A member 6                                   | CCDS1444.1      | chr1_204230473-204230473_G_A  | 162P>L  | Substitution | Nonsynonymous coding | 10% |
| MM12T | PLEKHA8P1 | pleckstrin homology domain containing, family A member 8 pseudogene 1                      | CCDS8747.1      | chr12_45567136-45567136_G_A   | 338A>V  | Substitution | Nonsynonymous coding | 35% |
| MM12T | PLEKHG1   | pleckstrin homology domain containing, family G (with RhoGef domain) member 1              | CCDS34552.1     | chr6_151130343-151130343_C_T  | 339R>W  | Substitution | Nonsynonymous coding | 11% |
| MM12T | PLEKHG1   | pleckstrin homology domain containing, family G (with RhoGef domain) member 1              | CCDS34552.1     | chr6_151153329-151153329_G_T  | 1028G>W | Substitution | Nonsynonymous coding | 18% |
| MM12T | PLEKHG2   | pleckstrin homology domain containing, family G (with RhoGef domain) member 2              | CCDS33022.2     | chr19_39915047-39915047_G_A   | 1092D>N | Substitution | Nonsynonymous coding | 10% |
| MM12T | PLEKHG3   | pleckstrin homology domain containing, family G (with RhoGef domain) member 3              | CCDS32098.1     | chr14_65198167-65198167_G_A   | 257R>H  | Substitution | Nonsynonymous coding | 30% |
| MM12T | PLEKHG4   | pleckstrin homology domain containing, family G (with RhoGef domain) member 4              | CCDS32466.1     | chr16_67320490-67320490_G_A   | 892R>Q  | Substitution | Nonsynonymous coding | 26% |

|       |          |                                                                                |                 |                               |         |              |                      |     |
|-------|----------|--------------------------------------------------------------------------------|-----------------|-------------------------------|---------|--------------|----------------------|-----|
| MM12T | PLEKHG4B | pleckstrin homology domain containing, family G (with RhoGef domain) member 4B | CCDS34124.1     | chr5_143284-143284_G_A        | 178G>S  | Substitution | Nonsynonymous coding | 39% |
| MM12T | PLEKHG4B | pleckstrin homology domain containing, family G (with RhoGef domain) member 4B | CCDS34124.1     | chr5_171491-171491_G_A        | 972V>I  | Substitution | Nonsynonymous coding | 32% |
| MM12T | PLEKHG4B | pleckstrin homology domain containing, family G (with RhoGef domain) member 4B | CCDS34124.1     | chr5_182166-182166_G_A        | 1182A>T | Substitution | Nonsynonymous coding | 12% |
| MM12T | PLEKHG5  | pleckstrin homology domain containing, family G (with RhoGef domain) member 5  | CCDS41240.1     | chr1_6531690-6531690_G_A      | 457A>V  | Substitution | Nonsynonymous coding | 12% |
| MM12T | PLEKHH1  | pleckstrin homology domain containing, family H (with MyTH4 domain) member 1   | CCDS45128.1     | chr14_68042685-68042685_G_A   | 772S>N  | Substitution | Nonsynonymous coding | 12% |
| MM12T | PLEKHO1  | pleckstrin homology domain containing, family O member 1                       | ENST00000441340 | chr1_150129573-150129573_C_A  | 20L>I   | Substitution | Nonsynonymous coding | 39% |
| MM12T | PLEKHS1  | pleckstrin homology domain containing, family S member 1                       | CCDS7583.1      | chr10_115534048-115534048_G_T | 245Q>H  | Substitution | Nonsynonymous coding | 34% |
| MM12T | PLG      | plasminogen                                                                    | CCDS5279.1      | chr6_161139801-161139801_C_T  | 343R>W  | Substitution | Nonsynonymous coding | 43% |
| MM12T | PLG      | plasminogen                                                                    | CCDS5279.1      | chr6_161135825-161135825_G_A  | ISV-1>  | Substitution | Splice site acceptor | 33% |
| MM12T | PLIN3    | perilipin 3                                                                    | CCDS12137.1     | chr19_4847789-4847789_C_T     | 250A>T  | Substitution | Nonsynonymous coding | 44% |
| MM12T | PLIN5    | perilipin 5                                                                    | CCDS42473.1     | chr19_4525766-4525766_C_T     | 200R>H  | Substitution | Nonsynonymous coding | 28% |
| MM12T | PLOD1    | procollagen-lysine, 2-oxoglutarate 5-dioxygenase 1                             | CCDS142.1       | chr1_12030833-12030833_C_T    | 621A>V  | Substitution | Nonsynonymous coding | 32% |
| MM12T | PLOD3    | procollagen-lysine, 2-oxoglutarate 5-dioxygenase 3                             | CCDS5715.1      | chr7_100860495-100860495_C_T  | 21A>T   | Substitution | Nonsynonymous coding | 33% |
| MM12T | PLRG1    | pleiotropic regulator 1                                                        | CCDS34083.1     | chr4_155470090-155470090_A    | NA      | Insertion    | Splice site acceptor | 31% |
| MM12T | PLTP     | phospholipid transfer protein                                                  | CCDS13386.1     | chr20_44533446-44533446_A_G   | 312V>A  | Substitution | Nonsynonymous coding | 33% |
| MM12T | PLTP     | phospholipid transfer protein                                                  | CCDS13386.1     | chr20_44538288-44538288_C_T   | 118A>T  | Substitution | Nonsynonymous coding | 27% |
| MM12T | PLXNA2   | plexin A2                                                                      | CCDS31013.1     | chr1_208202377-208202377_G_A  | 1746R>C | Substitution | Nonsynonymous coding | 26% |
| MM12T | PLXNA4   | plexin A4                                                                      | CCDS43646.1     | chr7_132192323-132192323_C_T  | 377G>D  | Substitution | Nonsynonymous coding | 12% |
| MM12T | PLXNB1   | plexin B1                                                                      | CCDS2765.1      | chr3_48461099-48461099_A_G    | 866S>P  | Substitution | Nonsynonymous coding | 27% |
| MM12T | PLXNC1   | plexin C1                                                                      | CCDS9049.1      | chr12_94694746-94694746_G_T   | 1433K>N | Substitution | Nonsynonymous coding | 14% |
| MM12T | PLXND1   | plexin D1                                                                      | CCDS33854.1     | chr3_129281680-129281680_C_T  | 1592C>Y | Substitution | Nonsynonymous coding | 10% |
| MM12T | PMCH     | pro-melanin-concentrating hormone                                              | CCDS31885.1     | chr12_102591318-102591318_C_A | 77E>D   | Substitution | Nonsynonymous coding | 17% |
| MM12T | PML      | promyelocytic leukemia                                                         | CCDS10255.1     | chr15_74315681-74315681_G_A   | 372R>H  | Substitution | Nonsynonymous coding | 37% |
| MM12T | PML      | promyelocytic leukemia                                                         | CCDS10255.1     | chr15_74325615-74325615_C_T   | 506P>L  | Substitution | Nonsynonymous coding | 25% |
| MM12T | PNCK     | pregnancy up-regulated non-ubiquitously expressed CaM kinase                   | ENST00000438984 | chrX_152935298-152935298_G_A  | 73P>L   | Substitution | Nonsynonymous coding | 15% |
| MM12T | PNCK     | pregnancy up-regulated non-ubiquitously expressed CaM kinase                   | CCDS35503.2     | chrX_152939452-152939452_G_A  | 60A>V   | Substitution | Nonsynonymous coding | 34% |
| MM12T | PNISR    | PNN-interacting serine/arginine-rich protein                                   | CCDS5043.1      | chr6_99858807-99858807_G_     | NA      | Deletion     | Frameshift           | 16% |
| MM12T | PNISR    | PNN-interacting serine/arginine-rich protein                                   | CCDS5043.1      | chr6_99862455-99862455_C_A    | 27Q>H   | Substitution | Nonsynonymous coding | 27% |
| MM12T | PNLDC1   | poly(A)-specific ribonuclease (PARN)-like domain containing 1                  | CCDS5271.1      | chr6_160222182-160222182_C_T  | 47R>C   | Substitution | Nonsynonymous coding | 20% |
| MM12T | PNLDC1   | poly(A)-specific ribonuclease (PARN)-like domain containing 1                  | CCDS5271.1      | chr6_160240290-160240290_C_T  | 469R>W  | Substitution | Nonsynonymous coding | 20% |
| MM12T | PNLDC1   | poly(A)-specific ribonuclease (PARN)-like domain containing 1                  | CCDS5271.1      | chr6_160240304-160240304_G_T  | 473K>N  | Substitution | Nonsynonymous coding | 25% |
| MM12T | PNLIP    | pancreatic lipase                                                              | CCDS7594.1      | chr10_118313341-118313341_C_T | 188R>C  | Substitution | Nonsynonymous coding | 38% |

|       |          |                                                                  |                 |                               |         |              |                      |     |
|-------|----------|------------------------------------------------------------------|-----------------|-------------------------------|---------|--------------|----------------------|-----|
| MM12T | PNMAL1   | paraneoplastic Ma antigen family-like 1                          | CCDS33059.1     | chr19_46973155-46973155_C_T   | 380E>K  | Substitution | Nonsynonymous coding | 32% |
| MM12T | PNN      | pinin, desmosome associated protein                              | CCDS9671.1      | chr14_39647101-39647101_C_T   | 160S>F  | Substitution | Nonsynonymous coding | 17% |
| MM12T | PNN      | pinin, desmosome associated protein                              | CCDS9671.1      | chr14_39649827-39649827_C_T   | 305A>V  | Substitution | Nonsynonymous coding | 13% |
| MM12T | PNN      | pinin, desmosome associated protein                              | CCDS9671.1      | chr14_39650210-39650210_A_T   | 433I>F  | Substitution | Nonsynonymous coding | 31% |
| MM12T | PNPLA4   | patatin-like phospholipase domain containing 4                   | CCDS14129.1     | chrX_7870046-7870046_G_A      | 205A>V  | Substitution | Nonsynonymous coding | 12% |
| MM12T | PNPLA6   | patatin-like phospholipase domain containing 6                   | CCDS32891.1     | chr19_7625936-7625936_G_A     | 1247A>T | Substitution | Nonsynonymous coding | 29% |
| MM12T | PNPLA6   | patatin-like phospholipase domain containing 6                   | CCDS32891.1     | chr19_7606406-7606406_A_G     | ISV-2>  | Substitution | Splice site acceptor | 27% |
| MM12T | PNPLA7   | patatin-like phospholipase domain containing 7                   | CCDS48070.1     | chr9_140435178-140435178_C_T  | ISV-4>  | Substitution | Splice site acceptor | 11% |
| MM12T | PNPO     | pyridoxamine 5'-phosphate oxidase                                | CCDS11522.1     | chr17_46019133-46019133_C_T   | 31A>V   | Substitution | Nonsynonymous coding | 41% |
| MM12T | PNPT1    | polyribonucleotide nucleotidyltransferase 1                      | CCDS1856.1      | chr2_55883510-55883511_AA_    | NA      | Deletion     | Splice site acceptor | 10% |
| MM12T | PODXL2   | podocalyxin-like 2                                               | CCDS3044.1      | chr3_127390401-127390401_C_T  | 517A>V  | Substitution | Nonsynonymous coding | 31% |
| MM12T | POGLUT1  | protein O-glucosyltransferase 1                                  | CCDS2988.1      | chr3_119209414-119209414_C_T  | 272R>X  | Substitution | Nonsense             | 11% |
| MM12T | POLD1    | polymerase (DNA directed), delta 1, catalytic subunit            | CCDS12795.1     | chr19_50912075-50912075_C_A   | 603F>L  | Substitution | Nonsynonymous coding | 15% |
| MM12T | POLE     | polymerase (DNA directed), epsilon, catalytic subunit            | CCDS9278.1      | chr12_133219168-133219168_G_A | 1626R>C | Substitution | Nonsynonymous coding | 10% |
| MM12T | POLE     | polymerase (DNA directed), epsilon, catalytic subunit            | CCDS9278.1      | chr12_133249851-133249851_A_G | 458Y>H  | Substitution | Nonsynonymous coding | 31% |
| MM12T | POLE     | polymerase (DNA directed), epsilon, catalytic subunit            | CCDS9278.1      | chr12_133249853-133249853_G_A | 457T>M  | Substitution | Nonsynonymous coding | 32% |
| MM12T | POLE2    | polymerase (DNA directed), epsilon 2, accessory subunit          | CCDS32073.1     | chr14_50122403-50122403_C_T   | 305R>H  | Substitution | Nonsynonymous coding | 31% |
| MM12T | POLQ     | polymerase (DNA directed), theta                                 | CCDS33833.1     | chr3_121154982-121154982_T_G  | 2510Q>H | Substitution | Nonsynonymous coding | 15% |
| MM12T | POLR1A   | polymerase (RNA) I polypeptide A, 194kDa                         | CCDS42706.1     | chr2_86269168-86269168_G_A    | 1139A>V | Substitution | Nonsynonymous coding | 17% |
| MM12T | POLR1A   | polymerase (RNA) I polypeptide A, 194kDa                         | CCDS42706.1     | chr2_86305292-86305292_A_G    | 401V>A  | Substitution | Nonsynonymous coding | 12% |
| MM12T | POLR1E   | polymerase (RNA) I polypeptide E, 53kDa                          | CCDS6611.1      | chr9_37495252-37495252_G_A    | 212D>N  | Substitution | Nonsynonymous coding | 11% |
| MM12T | POLR2A   | polymerase (RNA) II (DNA directed) polypeptide A, 220kDa         | CCDS32548.1     | chr17_7407038-7407038_G_T     | 1056E>D | Substitution | Nonsynonymous coding | 33% |
| MM12T | POLR3B   | polymerase (RNA) III (DNA directed) polypeptide B                | CCDS9105.1      | chr12_106895160-106895160_T_C | 1015M>T | Substitution | Nonsynonymous coding | 30% |
| MM12T | POLR3B   | polymerase (RNA) III (DNA directed) polypeptide B                | CCDS9105.1      | chr12_106799668-106799668_C_T | 294Q>X  | Substitution | Nonsense             | 12% |
| MM12T | POLR3E   | polymerase (RNA) III (DNA directed) polypeptide E (80kD)         | CCDS10605.1     | chr16_22326450-22326450_G_A   | 188R>H  | Substitution | Nonsynonymous coding | 36% |
| MM12T | POLR3E   | polymerase (RNA) III (DNA directed) polypeptide E (80kD)         | CCDS10605.1     | chr16_22335966-22335966_C_T   | 424T>M  | Substitution | Nonsynonymous coding | 30% |
| MM12T | POLRMT   | polymerase (RNA) mitochondrial (DNA directed)                    | CCDS12036.1     | chr19_620423-620423_G_A       | 902A>V  | Substitution | Nonsynonymous coding | 32% |
| MM12T | POM121   | POM121 transmembrane nucleoporin                                 | ENST00000434423 | chr7_72396233-72396233_C_T    | 192H>Y  | Substitution | Nonsynonymous coding | 41% |
| MM12T | POM121L2 | POM121 transmembrane nucleoporin-like 2                          | NM_033482       | chr6_27276881-27276881_C_A    | 1023E>D | Substitution | Nonsynonymous coding | 21% |
| MM12T | POM121L2 | POM121 transmembrane nucleoporin-like 2                          | NM_033482       | chr6_27277699-27277699_C_A    | 751A>S  | Substitution | Nonsynonymous coding | 22% |
| MM12T | POMC     | proopiomelanocortin                                              | CCDS1717.1      | chr2_25384390-25384390_C_T    | 122E>K  | Substitution | Nonsynonymous coding | 36% |
| MM12T | POMGNT1  | protein O-linked mannose beta1,2-N-acetylglucosaminyltransferase | CCDS531.1       | chr1_46657799-46657799_C_T    | 504V>I  | Substitution | Nonsynonymous coding | 38% |



|       |             |                                                                                         |                 |                              |        |              |                      |     |
|-------|-------------|-----------------------------------------------------------------------------------------|-----------------|------------------------------|--------|--------------|----------------------|-----|
| MM12T | POMT1       | protein-O-mannosyltransferase 1                                                         | CCDS6943.1      | chr9_134382806-134382806_C_T | 111A>V | Substitution | Nonsynonymous coding | 25% |
| MM12T | POU1F1      | POU class 1 homeobox 1                                                                  | CCDS46873.1     | chr3_87325600-87325600_C_T   | 5A>T   | Substitution | Nonsynonymous coding | 13% |
| MM12T | POU3F4      | POU class 3 homeobox 4                                                                  | CCDS14450.1     | chrX_82764233-82764233_C_A   | 301P>T | Substitution | Nonsynonymous coding | 34% |
| MM12T | POU5F1      | POU class 5 homeobox 1                                                                  | CCDS34391.1     | chr6_31133064-31133064_C_A   | ISV-1> | Substitution | Splice site acceptor | 24% |
| MM12T | POU5F2      | POU domain class 5, transcription factor 2                                              | NM_153216       | chr5_93076531-93076531_G_T   | 247L>I | Substitution | Nonsynonymous coding | 31% |
| MM12T | POU6F2      | POU class 6 homeobox 2                                                                  | CCDS34620.2     | chr7_39379582-39379582_C_T   | 285P>S | Substitution | Nonsynonymous coding | 14% |
| MM12T | PPAN-P2RY11 | PPAN-P2RY11 readthrough                                                                 | CCDS42498.1     | chr19_10225311-10225311_G_T  | 761S>I | Substitution | Nonsynonymous coding | 12% |
| MM12T | PPAP2A      | phosphatidic acid phosphatase type 2A                                                   | CCDS34160.1     | chr5_54786907-54786907_T_G   | 32I>L  | Substitution | Nonsynonymous coding | 28% |
| MM12T | PPEF1       | protein phosphatase, EF-hand calcium binding domain 1                                   | CCDS14188.1     | chrX_18748305-18748305_G_A   | 18R>K  | Substitution | Nonsynonymous coding | 26% |
| MM12T | PPFIA4      | protein tyrosine phosphatase, receptor type, f polypeptide (PTPRF), interacting protein | ENST00000367238 | chr1_203013227-203013227_C_T | ISV+4> | Substitution | Splice site donor    | 30% |
| MM12T | PPFIA4      | protein tyrosine phosphatase, receptor type, f polypeptide (PTPRF), interacting protein | ENST00000367238 | chr1_203017801-203017801_C_T | 439Q>X | Substitution | Nonsense             | 27% |
| MM12T | PPFIBP2     | PTPRF interacting protein, binding protein 2 (liprin beta 2)                            | CCDS31419.1     | chr11_7570710-7570710_G_A    | 2A>T   | Substitution | Nonsynonymous coding | 13% |
| MM12T | PPIE        | peptidylprolyl isomerase E (cyclophilin E)                                              | CCDS4443.1      | chr1_40214689-40214689_G_A   | 208G>D | Substitution | Nonsynonymous coding | 12% |
| MM12T | PPIL2       | peptidylprolyl isomerase (cyclophilin)-like 2                                           | CCDS46670.1     | chr22_22035630-22035630_A_G  | 113N>S | Substitution | Nonsynonymous coding | 23% |
| MM12T | PPL         | periplakin                                                                              | CCDS10526.1     | chr16_4945721-4945721_G      | NA     | Insertion    | Splice site acceptor | 31% |
| MM12T | PPM1A       | protein phosphatase, Mg2+/Mn2+ dependent, 1A                                            | CCDS45120.1     | chr14_60749518-60749518_C_T  | 106R>C | Substitution | Nonsynonymous coding | 30% |
| MM12T | PPM1F       | protein phosphatase, Mg2+/Mn2+ dependent, 1F                                            | CCDS13796.1     | chr22_22300290-22300290_G_A  | 44A>V  | Substitution | Nonsynonymous coding | 35% |
| MM12T | PPM1J       | protein phosphatase, Mg2+/Mn2+ dependent, 1J                                            | CCDS855.2       | chr1_113253892-113253892_C_T | 348G>S | Substitution | Nonsynonymous coding | 17% |
| MM12T | PPP1R12C    | protein phosphatase 1, regulatory subunit 12C                                           | CCDS12916.1     | chr19_55604185-55604185_C_T  | 626R>H | Substitution | Nonsynonymous coding | 32% |
| MM12T | PPP1R13L    | protein phosphatase 1, regulatory subunit 13 like                                       | CCDS33050.1     | chr19_45885868-45885868_G_A  | 789R>W | Substitution | Nonsynonymous coding | 32% |
| MM12T | PPP1R13L    | protein phosphatase 1, regulatory subunit 13 like                                       | CCDS33050.1     | chr19_45899018-45899018_G_A  | 344R>C | Substitution | Nonsynonymous coding | 33% |
| MM12T | PPP1R13L    | protein phosphatase 1, regulatory subunit 13 like                                       | CCDS33050.1     | chr19_45901357-45901357_G_A  | 35A>V  | Substitution | Nonsynonymous coding | 35% |
| MM12T | PPP1R15B    | protein phosphatase 1, regulatory subunit 15B                                           | CCDS1445.1      | chr1_204379243-204379243_C_T | 433A>T | Substitution | Nonsynonymous coding | 29% |
| MM12T | PPP1R16B    | protein phosphatase 1, regulatory subunit 16B                                           | CCDS13309.1     | chr20_37464809-37464809_G_A  | 81A>T  | Substitution | Nonsynonymous coding | 28% |
| MM12T | PPP1R16B    | protein phosphatase 1, regulatory subunit 16B                                           | CCDS13309.1     | chr20_37546854-37546854_C_T  | 417R>X | Substitution | Nonsense             | 39% |
| MM12T | PPP1R3B     | protein phosphatase 1, regulatory subunit 3B                                            | CCDS5973.1      | chr8_8998755-8998755_T_A     | 136E>V | Substitution | Nonsynonymous coding | 14% |
| MM12T | PPP1R3F     | protein phosphatase 1, regulatory subunit 3F                                            | CCDS35254.1     | chrX_49143400-49143400_G_A   | 750E>K | Substitution | Nonsynonymous coding | 11% |
| MM12T | PPP1R7      | protein phosphatase 1, regulatory subunit 7                                             | CCDS2546.1      | chr2_242097921-242097921_G_A | 87R>H  | Substitution | Nonsynonymous coding | 39% |
| MM12T | PPP1R9B     | protein phosphatase 1, regulatory subunit 9B                                            | ENST00000316878 | chr17_48213382-48213382_C_T  | 750E>K | Substitution | Nonsynonymous coding | 11% |
| MM12T | PPP2R5B     | protein phosphatase 2, regulatory subunit B', beta                                      | CCDS8085.1      | chr11_64695559-64695559_C_T  | 174R>C | Substitution | Nonsynonymous coding | 29% |
| MM12T | PPP2R5E     | protein phosphatase 2, regulatory subunit B', epsilon isoform                           | CCDS9758.1      | chr14_63920453-63920453_C_A  | 103S>I | Substitution | Nonsynonymous coding | 21% |
| MM12T | PPP4R1L     | protein phosphatase 4, regulatory subunit 1-like                                        | ENST00000334187 | chr20_56826875-56826875_G_A  | 161R>C | Substitution | Nonsynonymous coding | 26% |

|       |          |                                                                          |                 |                               |         |              |                      |     |
|-------|----------|--------------------------------------------------------------------------|-----------------|-------------------------------|---------|--------------|----------------------|-----|
| MM12T | PPP4R4   | protein phosphatase 4, regulatory subunit 4                              | CCDS9921.1      | chr14_94712745-94712745_G_A   | 494A>T  | Substitution | Nonsynonymous coding | 15% |
| MM12T | PPP6C    | protein phosphatase 6, catalytic subunit                                 | CCDS48018.1     | chr9_127920643-127920643_C_A  | 123G>C  | Substitution | Nonsynonymous coding | 31% |
| MM12T | PPP6R1   | protein phosphatase 6, regulatory subunit 1                              | CCDS46186.1     | chr19_55750846-55750846_G_A   | 560R>C  | Substitution | Nonsynonymous coding | 29% |
| MM12T | PPP6R3   | protein phosphatase 6, regulatory subunit 3                              | CCDS8182.1      | chr11_68355426-68355426_C_T   | 475T>M  | Substitution | Nonsynonymous coding | 18% |
| MM12T | PPP6R3   | protein phosphatase 6, regulatory subunit 3                              | CCDS8182.1      | chr11_68377458-68377458_C_T   | 766A>V  | Substitution | Nonsynonymous coding | 31% |
| MM12T | PPRC1    | peroxisome proliferator-activated receptor gamma, coactivator-related 1  | CCDS7529.1      | chr10_103906723-103906723_G_A | 1325R>H | Substitution | Nonsynonymous coding | 14% |
| MM12T | PQBP1    | polyglutamine binding protein 1                                          | CCDS14309.1     | chrX_48759573-48759573_G_A    | 119R>H  | Substitution | Nonsynonymous coding | 27% |
| MM12T | PRAF2    | PRA1 domain family, member 2                                             | CCDS14317.1     | chrX_48931573-48931573_G_A    | 25P>L   | Substitution | Nonsynonymous coding | 12% |
| MM12T | PRDM11   | PR domain containing 11                                                  | CCDS7912.1      | chr11_45204460-45204460_G_A   | 125G>D  | Substitution | Nonsynonymous coding | 15% |
| MM12T | PRDM16   | PR domain containing 16                                                  | CCDS41236.1     | chr1_3328479-3328479_C_T      | 573A>V  | Substitution | Nonsynonymous coding | 29% |
| MM12T | PRDM6    | PR domain containing 6                                                   | CCDS47259.1     | chr5_122522836-122522836_C_T  | 577R>W  | Substitution | Nonsynonymous coding | 12% |
| MM12T | PRDM9    | PR domain containing 9                                                   | CCDS43307.1     | chr5_23510140-23510140_A_C    | ISV+4>  | Substitution | Splice site donor    | 31% |
| MM12T | PRDX4    | peroxiredoxin 4                                                          | ENST00000418872 | chrX_23682667-23682667_G_T    | 11G>C   | Substitution | Nonsynonymous coding | 27% |
| MM12T | PREB     | prolactin regulatory element binding                                     | CCDS1738.1      | chr6_27355721-27355721_G_T    | 206P>H  | Substitution | Nonsynonymous coding | 15% |
| MM12T | PREP     | prolyl endopeptidase                                                     | CCDS5053.1      | chr6_105726048-105726048_G_A  | 702R>W  | Substitution | Nonsynonymous coding | 21% |
| MM12T | PREX2    | phosphatidylinositol-3,4,5-trisphosphate-dependent Rac exchange factor 2 | CCDS6201.1      | chr8_69046462-69046462_C_T    | 1312A>V | Substitution | Nonsynonymous coding | 42% |
| MM12T | PRG3     | proteoglycan 3                                                           | CCDS7954.1      | chr11_57147239-57147239_C_T   | 35D>N   | Substitution | Nonsynonymous coding | 15% |
| MM12T | PRH1     | proline-rich protein HaeIII subfamily 1                                  | NM_006250       | chr12_11034896-11034896_G_A   | 147Q>X  | Substitution | Nonsense             | 19% |
| MM12T | PRICKLE1 | prickle homolog 1 (Drosophila)                                           | CCDS8742.1      | chr12_42858833-42858833_G_A   | 335R>X  | Substitution | Nonsense             | 15% |
| MM12T | PRKAG1   | protein kinase, AMP-activated, gamma 1 non-catalytic subunit             | CCDS8777.1      | chr12_49399094-49399094_C_T   | 102A>T  | Substitution | Nonsynonymous coding | 37% |
| MM12T | PRKAG2   | protein kinase, AMP-activated, gamma 2 non-catalytic subunit             | CCDS5928.1      | chr7_151372621-151372621_C_T  | 190R>H  | Substitution | Nonsynonymous coding | 25% |
| MM12T | PRKCQ    | protein kinase C, theta                                                  | CCDS7079.1      | chr10_6498668-6498668_A_T     | 539F>I  | Substitution | Nonsynonymous coding | 36% |
| MM12T | PRKCQ    | protein kinase C, theta                                                  | CCDS7079.1      | chr10_6525416-6525416_C_A     | 389G>X  | Substitution | Nonsense             | 30% |
| MM12T | PRKD2    | protein kinase D2                                                        | CCDS12689.1     | chr19_47217236-47217236_C_T   | 88G>D   | Substitution | Nonsynonymous coding | 13% |
| MM12T | PRKDC    | protein kinase, DNA-activated, catalytic polypeptide                     | ENST00000314191 | chr8_48690359-48690359_G_A    | 3976T>M | Substitution | Nonsynonymous coding | 26% |
| MM12T | PRKDC    | protein kinase, DNA-activated, catalytic polypeptide                     | ENST00000314191 | chr8_48736460-48736460_C_A    | 2960A>S | Substitution | Nonsynonymous coding | 32% |
| MM12T | PRKDC    | protein kinase, DNA-activated, catalytic polypeptide                     | ENST00000314191 | chr8_48855909-48855909_C_T    | 276A>T  | Substitution | Nonsynonymous coding | 14% |
| MM12T | PRKDC    | protein kinase, DNA-activated, catalytic polypeptide                     | ENST00000314191 | chr8_48869984-48869984_C_A    | 54Q>H   | Substitution | Nonsynonymous coding | 32% |
| MM12T | PRKDC    | protein kinase, DNA-activated, catalytic polypeptide                     | ENST00000314191 | chr8_48691288-48691288_C_T    | ISV+1>  | Substitution | Splice site donor    | 14% |
| MM12T | PRL      | prolactin                                                                | CCDS4548.1      | chr6_22292835-22292835_C_T    | 82A>T   | Substitution | Nonsynonymous coding | 21% |
| MM12T | PRMT2    | protein arginine methyltransferase 2                                     | CCDS13737.1     | chr21_48081814-48081814_C_A   | 355P>T  | Substitution | Nonsynonymous coding | 31% |
| MM12T | PRMT8    | protein arginine methyltransferase 8                                     | CCDS8521.2      | chr12_3649841-3649841_G_A     | 49V>M   | Substitution | Nonsynonymous coding | 27% |

|       |         |                                                                 |             |                              |         |              |                      |     |
|-------|---------|-----------------------------------------------------------------|-------------|------------------------------|---------|--------------|----------------------|-----|
| MM12T | PRND    | prion protein 2 (dublet)                                        | CCDS13081.1 | chr20_4705388-4705388_G_A    | 64R>H   | Substitution | Nonsynonymous coding | 11% |
| MM12T | PROC    | protein C (inactivator of coagulation factors Va and VIIIa)     | CCDS2145.1  | chr2_128186299-128186299_C_T | 388A>V  | Substitution | Nonsynonymous coding | 11% |
| MM12T | PRODH   | proline dehydrogenase (oxidase) 1                               | CCDS13754.1 | chr22_18912662-18912662_C_T  | 190R>H  | Substitution | Nonsynonymous coding | 12% |
| MM12T | PROSER1 | proline and serine rich 1                                       | CCDS9368.2  | chr13_39588550-39588550_G_A  | 280A>V  | Substitution | Nonsynonymous coding | 11% |
| MM12T | PROX2   | prospero homeobox 2                                             | CCDS45136.1 | chr14_75330186-75330186_C_A  | 118A>S  | Substitution | Nonsynonymous coding | 18% |
| MM12T | PRPF18  | PRP18 pre-mRNA processing factor 18 homolog (S. cerevisiae)     | CCDS7100.1  | chr10_13642268-13642268_A_T  | 57K>X   | Substitution | Nonsense             | 28% |
| MM12T | PRPF38B | PRP38 pre-mRNA processing factor 38 (yeast) domain containing B | CCDS788.1   | chr1_109235421-109235421_C_T | 70P>S   | Substitution | Nonsynonymous coding | 32% |
| MM12T | PRPF40B | PRP40 pre-mRNA processing factor 40 homolog B (S. cerevisiae)   | CCDS31796.1 | chr12_50035736-50035736_G_A  | 583A>T  | Substitution | Nonsynonymous coding | 11% |
| MM12T | PRPF8   | PRP8 pre-mRNA processing factor 8 homolog (S. cerevisiae)       | CCDS11010.1 | chr17_1562055-1562055_G_A    | 1714A>V | Substitution | Nonsynonymous coding | 10% |
| MM12T | PRPF8   | PRP8 pre-mRNA processing factor 8 homolog (S. cerevisiae)       | CCDS11010.1 | chr17_1582684-1582684_G_A    | 437A>V  | Substitution | Nonsynonymous coding | 23% |
| MM12T | PRPF8   | PRP8 pre-mRNA processing factor 8 homolog (S. cerevisiae)       | CCDS11010.1 | chr17_1587790-1587790_A_G    | 26S>P   | Substitution | Nonsynonymous coding | 21% |
| MM12T | PRR12   | proline rich 12                                                 | CCDS46143.1 | chr19_50098878-50098878_C_A  | 429T>N  | Substitution | Nonsynonymous coding | 11% |
| MM12T | PRR12   | proline rich 12                                                 | CCDS46143.1 | chr19_50099792-50099792_C_T  | 734R>W  | Substitution | Nonsynonymous coding | 16% |
| MM12T | PRR12   | proline rich 12                                                 | CCDS46143.1 | chr19_50100809-50100809_C_T  | 1073L>F | Substitution | Nonsynonymous coding | 33% |
| MM12T | PRR14L  | proline rich 14-like                                            | CCDS13900.2 | chr22_32134581-32134581_G_T  | 89P>H   | Substitution | Nonsynonymous coding | 25% |
| MM12T | PRR3    | proline rich 3                                                  | CCDS43440.1 | chr6_30525192-30525192_A_G   | 24E>G   | Substitution | Nonsynonymous coding | 23% |
| MM12T | PRR5    | proline rich 5 (renal)                                          | CCDS14058.1 | chr22_45110503-45110503_G_A  | 56R>H   | Substitution | Nonsynonymous coding | 22% |
| MM12T | PRRC2A  | proline-rich coiled-coil 2A                                     | CCDS4708.1  | chr6_31600342-31600342_G_T   | 1298A>S | Substitution | Nonsynonymous coding | 25% |
| MM12T | PRRC2A  | proline-rich coiled-coil 2A                                     | CCDS4708.1  | chr6_31602070-31602070_G_T   | 1593G>C | Substitution | Nonsynonymous coding | 21% |
| MM12T | PRRC2B  | proline-rich coiled-coil 2B                                     | CCDS48044.1 | chr9_134314436-134314436_G_T | 153G>X  | Substitution | Nonsense             | 17% |
| MM12T | PRRG3   | proline rich Gla (G-carboxyglutamic acid) 3 (transmembrane)     | CCDS14699.1 | chrX_150868547-150868547_G_T | 29Q>H   | Substitution | Nonsynonymous coding | 28% |
| MM12T | PRRT4   | proline-rich transmembrane protein 4                            | CCDS47698.1 | chr7_127999913-127999913_C_T | 45A>T   | Substitution | Nonsynonymous coding | 13% |
| MM12T | PRSS22  | protease, serine, 22                                            | CCDS10481.1 | chr16_2906837-2906837_G_A    | 32A>V   | Substitution | Nonsynonymous coding | 14% |
| MM12T | PRSS23  | protease, serine, 23                                            | CCDS8278.1  | chr11_86519669-86519669_G_T  | 328Q>H  | Substitution | Nonsynonymous coding | 31% |
| MM12T | PRSS36  | protease, serine, 36                                            | CCDS32436.1 | chr16_31154285-31154285_T_C  | 377D>G  | Substitution | Nonsynonymous coding | 32% |
| MM12T | PRSS37  | protease, serine, 37                                            | CCDS34764.1 | chr7_141536278-141536278_G_A | 209H>Y  | Substitution | Nonsynonymous coding | 17% |
| MM12T | PRSS38  | protease, serine, 38                                            | CCDS1563.1  | chr1_228003563-228003563_T_C | 49V>A   | Substitution | Nonsynonymous coding | 29% |
| MM12T | PRSS45  | protease, serine, 45                                            | CCDS46815.1 | chr3_46785536-46785536_G_A   | 70H>Y   | Substitution | Nonsynonymous coding | 16% |
| MM12T | PRSS58  | protease, serine, 58                                            | CCDS5871.1  | chr7_141952159-141952159_C_T | 203G>E  | Substitution | Nonsynonymous coding | 15% |
| MM12T | PRTG    | protogenin                                                      | CCDS42040.1 | chr15_55912281-55912281_G_A  | 1128R>W | Substitution | Nonsynonymous coding | 29% |
| MM12T | PRTG    | protogenin                                                      | CCDS42040.1 | chr15_55965835-55965835_C_A  | 529S>I  | Substitution | Nonsynonymous coding | 26% |
| MM12T | PRUNE2  | prune homolog 2 (Drosophila)                                    | CCDS47982.1 | chr9_79318626-79318626_A_C   | 2635F>V | Substitution | Nonsynonymous coding | 27% |

|       |         |                                                                                           |              |                              |         |              |                      |     |
|-------|---------|-------------------------------------------------------------------------------------------|--------------|------------------------------|---------|--------------|----------------------|-----|
| MM12T | PRX     | periaxin                                                                                  | CCDS33028.1  | chr19_40903609-40903609_G_A  | 217A>V  | Substitution | Nonsynonymous coding | 30% |
| MM12T | PSAP    | prosaposin                                                                                | CCDS7311.1   | chr10_73579489-73579489_G_A  | 392R>W  | Substitution | Nonsynonymous coding | 14% |
| MM12T | PSAP    | prosaposin                                                                                | CCDS7311.1   | chr10_73579554-73579554_G_T  | 370S>Y  | Substitution | Nonsynonymous coding | 15% |
| MM12T | PSD2    | pleckstrin and Sec7 domain containing 2                                                   | CCDS4216.1   | chr5_139216791-139216791_G_A | 545V>M  | Substitution | Nonsynonymous coding | 21% |
| MM12T | PSD3    | pleckstrin and Sec7 domain containing 3                                                   | CCDS43720.1  | chr8_18393443-18393443_C_A   | 985S>I  | Substitution | Nonsynonymous coding | 30% |
| MM12T | PSD4    | pleckstrin and Sec7 domain containing 4                                                   | CCDS33276.1  | chr2_113943833-113943833_G_A | ISV+1>  | Substitution | Splice site donor    | 11% |
| MM12T | PSKH1   | protein serine kinase H1                                                                  | CCDS10851.1  | chr16_67942674-67942674_G_A  | 8V>I    | Substitution | Nonsynonymous coding | 30% |
| MM12T | PSKH2   | protein serine kinase H2                                                                  | CCDS6240.1   | chr8_87081839-87081839_C_T   | 5A>T    | Substitution | Nonsynonymous coding | 12% |
| MM12T | PSMB11  | proteasome (prosome, macropain) subunit, beta type, 11                                    | CCDS41923.1  | chr14_23512147-23512147_G_A  | 238R>H  | Substitution | Nonsynonymous coding | 12% |
| MM12T | PSMB8   | proteasome (prosome, macropain) subunit, beta type, 8 (large multifunctional peptidase 7) | CCDS4757.1   | chr6_32811770-32811770_C_A   | 2A>S    | Substitution | Nonsynonymous coding | 17% |
| MM12T | PSMB9   | proteasome (prosome, macropain) subunit, beta type, 9 (large multifunctional peptidase 2) | CCDS4759.1   | chr6_32826229-32826229_C_T   | 160A>V  | Substitution | Nonsynonymous coding | 16% |
| MM12T | PSMC3   | proteasome (prosome, macropain) 26S subunit, ATPase, 3                                    | CCDS7935.1   | chr11_47444216-47444216_C_T  | 265A>T  | Substitution | Nonsynonymous coding | 24% |
| MM12T | PSMD1   | proteasome (prosome, macropain) 26S subunit, non-ATPase, 1                                | CCDS2482.1   | chr2_231940259-231940259_G_A | 306A>T  | Substitution | Nonsynonymous coding | 37% |
| MM12T | PSMD2   | proteasome (prosome, macropain) 26S subunit, non-ATPase, 2                                | CCDS3258.1   | chr3_184023669-184023669_G_T | 551K>N  | Substitution | Nonsynonymous coding | 28% |
| MM12T | PSMD3   | proteasome (prosome, macropain) 26S subunit, non-ATPase, 3                                | CCDS11356.1  | chr17_38140676-38140676_T_C  | 117V>A  | Substitution | Nonsynonymous coding | 38% |
| MM12T | PSMD6   | proteasome (prosome, macropain) 26S subunit, non-ATPase, 6                                | CCDS2901.1   | chr3_64004517-64004517_C_T   | 232E>K  | Substitution | Nonsynonymous coding | 30% |
| MM12T | PSMD7   | proteasome (prosome, macropain) 26S subunit, non-ATPase, 7                                | CCDS10910.1  | chr16_74335485-74335485_G_T  | 98G>C   | Substitution | Nonsynonymous coding | 26% |
| MM12T | PSME4   | proteasome (prosome, macropain) activator subunit 4                                       | CCDS33197.2  | chr2_54149665-54149665_G_A   | 679L>F  | Substitution | Nonsynonymous coding | 11% |
| MM12T | PSPN    | persephin                                                                                 | CCDS12164.1  | chr19_6375607-6375607_G_A    | 57R>C   | Substitution | Nonsynonymous coding | 24% |
| MM12T | PSTPIP2 | proline-serine-threonine phosphatase interacting protein 2                                | CCDS32820.2  | chr18_43577742-43577742_C_T  | 205W>X  | Substitution | Nonsense             | 31% |
| MM12T | PTBP1   | polypyrimidine tract binding protein 1                                                    | CCDS42456.1  | chr19_806468-806468_C_T      | 344A>V  | Substitution | Nonsynonymous coding | 16% |
| MM12T | PTCH2   | patched 2                                                                                 | CCDS516.1    | chr1_45288829-45288829_G_A   | 1090A>V | Substitution | Nonsynonymous coding | 31% |
| MM12T | PTCH2   | patched 2                                                                                 | CCDS516.1    | chr1_45293561-45293561_A_G   | 671F>S  | Substitution | Nonsynonymous coding | 35% |
| MM12T | PTCHD1  | patched domain containing 1                                                               | CCDS35215.2  | chrX_23353155-23353155_C_A   | 55L>M   | Substitution | Nonsynonymous coding | 32% |
| MM12T | PTCHD4  | patched domain containing 4                                                               | NM_001013732 | chr6_48036025-48036025_T_C   | 123N>D  | Substitution | Nonsynonymous coding | 10% |
| MM12T | PTDSS2  | phosphatidylserine synthase 2                                                             | CCDS7696.1   | chr11_460209-460209_C_A      | 69L>I   | Substitution | Nonsynonymous coding | 32% |
| MM12T | PTEN    | phosphatase and tensin homolog                                                            | NM_000314    | chr10_89720812-89720812__A   | NA      | Insertion    | Frameshift           | 54% |
| MM12T | PTEN    | phosphatase and tensin homolog                                                            | NM_000314    | chr10_89692967-89692967_G_A  | 151A>T  | Substitution | Nonsynonymous coding | 35% |
| MM12T | PTEN    | phosphatase and tensin homolog                                                            | NM_000314    | chr10_89711900-89711900_G_A  | 173R>H  | Substitution | Nonsynonymous coding | 17% |
| MM12T | PTGDR2  | prostaglandin D2 receptor 2                                                               | CCDS7994.1   | chr11_60620204-60620204_C_A  | 331S>I  | Substitution | Nonsynonymous coding | 11% |
| MM12T | PTGDS   | prostaglandin D2 synthase 21kDa (brain)                                                   | CCDS7019.1   | chr9_139874679-139874679_G_A | 165A>T  | Substitution | Nonsynonymous coding | 11% |
| MM12T | PTGER1  | prostaglandin E receptor 1 (subtype EP1), 42kDa                                           | CCDS12309.1  | chr19_14584322-14584322_A_G  | 271S>P  | Substitution | Nonsynonymous coding | 36% |

|       |        |                                                                                     |              |                               |         |              |                      |     |
|-------|--------|-------------------------------------------------------------------------------------|--------------|-------------------------------|---------|--------------|----------------------|-----|
| MM12T | PTGER4 | prostaglandin E receptor 4 (subtype EP4)                                            | CCDS3930.1   | chr5_40691884-40691884_C_T    | 291R>X  | Substitution | Nonsense             | 17% |
| MM12T | PTGFRN | prostaglandin F2 receptor inhibitor                                                 | CCDS890.1    | chr1_117527352-117527352_G_A  | 740D>N  | Substitution | Nonsynonymous coding | 26% |
| MM12T | PTGFRN | prostaglandin F2 receptor inhibitor                                                 | CCDS890.1    | chr1_117529431-117529431_G_A  | 828A>T  | Substitution | Nonsynonymous coding | 13% |
| MM12T | PTGIR  | prostaglandin I2 (prostacyclin) receptor (IP)                                       | CCDS12686.1  | chr19_47126878-47126878_C_T   | 202C>Y  | Substitution | Nonsynonymous coding | 11% |
| MM12T | PTGIR  | prostaglandin I2 (prostacyclin) receptor (IP)                                       | CCDS12686.1  | chr19_47127134-47127134_G_A   | 117R>C  | Substitution | Nonsynonymous coding | 29% |
| MM12T | PTGIS  | prostaglandin I2 (prostacyclin) synthase                                            | CCDS13419.1  | chr20_48129637-48129637_C_A   | 396E>X  | Substitution | Nonsense             | 11% |
| MM12T | PTGS1  | prostaglandin-endoperoxide synthase 1 (prostaglandin G/H synthase and               | CCDS6842.1   | chr9_125154482-125154482_G_A  | 487A>T  | Substitution | Nonsynonymous coding | 16% |
| MM12T | PTH2R  | parathyroid hormone 2 receptor                                                      | CCDS2383.1   | chr2_209358273-209358273_G_T  | 514K>N  | Substitution | Nonsynonymous coding | 30% |
| MM12T | PTK2B  | PTK2B protein tyrosine kinase 2 beta                                                | CCDS6057.1   | chr8_27292043-27292043_C_T    | 387R>W  | Substitution | Nonsynonymous coding | 27% |
| MM12T | PTK2B  | PTK2B protein tyrosine kinase 2 beta                                                | CCDS6057.1   | chr8_27311740-27311740_C_T    | 889R>W  | Substitution | Nonsynonymous coding | 12% |
| MM12T | PTK7   | PTK7 protein tyrosine kinase 7                                                      | CCDS4884.1   | chr6_43097540-43097540_T_G    | 148L>R  | Substitution | Nonsynonymous coding | 28% |
| MM12T | PTPLA  | protein tyrosine phosphatase-like (proline instead of catalytic arginine), member A | CCDS7121.1   | chr10_17641349-17641349_C_T   | 182R>H  | Substitution | Nonsynonymous coding | 11% |
| MM12T | PTPN14 | protein tyrosine phosphatase, non-receptor type 14                                  | CCDS1514.1   | chr1_214546057-214546057_C_A  | 1011E>D | Substitution | Nonsynonymous coding | 43% |
| MM12T | PTPN14 | protein tyrosine phosphatase, non-receptor type 14                                  | CCDS1514.1   | chr1_214638112-214638112_C_T  | 12R>H   | Substitution | Nonsynonymous coding | 30% |
| MM12T | PTPN21 | protein tyrosine phosphatase, non-receptor type 21                                  | CCDS9884.1   | chr14_88946099-88946099_C_T   | 559R>Q  | Substitution | Nonsynonymous coding | 43% |
| MM12T | PTPN23 | protein tyrosine phosphatase, non-receptor type 23                                  | CCDS2754.1   | chr3_47451731-47451731_G_A    | 815V>I  | Substitution | Nonsynonymous coding | 10% |
| MM12T | PTPN7  | protein tyrosine phosphatase, non-receptor type 7                                   | CCDS1422.1   | chr1_202119449-202119449_G_A  | 366R>W  | Substitution | Nonsynonymous coding | 33% |
| MM12T | PTPN7  | protein tyrosine phosphatase, non-receptor type 7                                   | CCDS1422.1   | chr1_202119484-202119484_C_T  | 354G>E  | Substitution | Nonsynonymous coding | 13% |
| MM12T | PTPRA  | protein tyrosine phosphatase, receptor type, A                                      | CCDS13038.1  | chr20_3002824-3002824_C_T     | 429A>V  | Substitution | Nonsynonymous coding | 11% |
| MM12T | PTPRC  | protein tyrosine phosphatase, receptor type, C                                      | CCDS1397.1   | chr1_198671606-198671606_C_A  | 175S>Y  | Substitution | Nonsynonymous coding | 14% |
| MM12T | PTPRG  | protein tyrosine phosphatase, receptor type, G                                      | CCDS2895.1   | chr3_62204644-62204644_C_T    | 759L>F  | Substitution | Nonsynonymous coding | 11% |
| MM12T | PTPRJ  | protein tyrosine phosphatase, receptor type, J                                      | CCDS7945.1   | chr11_48168450-48168450_T_G   | 978F>L  | Substitution | Nonsynonymous coding | 12% |
| MM12T | PTPRN  | protein tyrosine phosphatase, receptor type, N                                      | CCDS2440.1   | chr2_220162785-220162785_C_A  | 570S>I  | Substitution | Nonsynonymous coding | 36% |
| MM12T | PTPRN2 | protein tyrosine phosphatase, receptor type, N polypeptide 2                        | CCDS5947.1   | chr7_157449122-157449122_C_T  | 708R>H  | Substitution | Nonsynonymous coding | 30% |
| MM12T | PTPRN2 | protein tyrosine phosphatase, receptor type, N polypeptide 2                        | CCDS5947.1   | chr7_157959919-157959919_G_A  | 205P>L  | Substitution | Nonsynonymous coding | 33% |
| MM12T | PTPRQ  | protein tyrosine phosphatase, receptor type, Q                                      | NM_001145026 | chr12_81063246-81063246_A_    | NA      | Deletion     | Splice site donor    | 19% |
| MM12T | PTPRT  | protein tyrosine phosphatase, receptor type, T                                      | CCDS42874.1  | chr20_41419965-41419965_G_A   | 119A>V  | Substitution | Nonsynonymous coding | 29% |
| MM12T | PTPRU  | protein tyrosine phosphatase, receptor type, U                                      | CCDS334.1    | chr1_29611366-29611366_T_C    | 768V>A  | Substitution | Nonsynonymous coding | 31% |
| MM12T | PTPRZ1 | protein tyrosine phosphatase, receptor-type, Z polypeptide 1                        | CCDS34740.1  | chr7_121653434-121653434_G_A  | 1445C>Y | Substitution | Nonsynonymous coding | 34% |
| MM12T | PUS7   | pseudouridylylase synthase 7 homolog (S. cerevisiae)                                | CCDS34725.1  | chr7_105105834-105105834_T_C  | 518D>G  | Substitution | Nonsynonymous coding | 33% |
| MM12T | PWP1   | PWP1 homolog (S. cerevisiae)                                                        | CCDS9114.1   | chr12_108086811-108086811_C_T | 147P>L  | Substitution | Nonsynonymous coding | 22% |
| MM12T | PWP1   | PWP1 homolog (S. cerevisiae)                                                        | CCDS9114.1   | chr12_108105990-108105990_A_T | 500E>V  | Substitution | Nonsynonymous coding | 32% |

|       |             |                                                      |             |                               |        |              |                      |     |
|-------|-------------|------------------------------------------------------|-------------|-------------------------------|--------|--------------|----------------------|-----|
| MM12T | PWP2        | PWP2 periodic tryptophan protein homolog (yeast)     | CCDS33579.1 | chr21_45539340-45539340_G_T   | 375S>I | Substitution | Nonsynonymous coding | 29% |
| MM12T | PWP2        | PWP2 periodic tryptophan protein homolog (yeast)     | CCDS33579.1 | chr21_45550531-45550531_C_T   | 880R>W | Substitution | Nonsynonymous coding | 14% |
| MM12T | PWWP2A      | PWWP domain containing 2A                            | CCDS47332.1 | chr5_159520116-159520116_C_T  | 514R>H | Substitution | Nonsynonymous coding | 33% |
| MM12T | PWWP2A      | PWWP domain containing 2A                            | CCDS47332.1 | chr5_159520164-159520164_C_T  | 498R>Q | Substitution | Nonsynonymous coding | 33% |
| MM12T | PWWP2A      | PWWP domain containing 2A                            | CCDS47332.1 | chr5_159520348-159520348_C_T  | 437E>K | Substitution | Nonsynonymous coding | 16% |
| MM12T | PWWP2B      | PWWP domain containing 2B                            | CCDS7667.2  | chr10_134218518-134218518_C_T | 172R>W | Substitution | Nonsynonymous coding | 27% |
| MM12T | PXDN        | peroxidasin homolog (Drosophila)                     | CCDS46221.1 | chr2_1691440-1691440_C_A      | 127R>M | Substitution | Nonsynonymous coding | 13% |
| MM12T | PXN         | peroxidasin homolog (Drosophila)-like                | CCDS47855.1 | chr8_52321596-52321596_G_A    | 863A>V | Substitution | Nonsynonymous coding | 32% |
| MM12T | PXMP2       | peroxisomal membrane protein 2, 22kDa                | CCDS9279.1  | chr12_133277870-133277870_G   | NA     | Insertion    | Frameshift           | 23% |
| MM12T | PXN         | paxillin                                             | CCDS44997.1 | chr12_120662026-120662026_C_A | 56E>D  | Substitution | Nonsynonymous coding | 38% |
| MM12T | PYGM        | phosphorylase, glycogen, muscle                      | CCDS8079.1  | chr11_64519094-64519094_G_T   | 601P>H | Substitution | Nonsynonymous coding | 18% |
| MM12T | PYGM        | phosphorylase, glycogen, muscle                      | CCDS8079.1  | chr11_64521057-64521057_C_T   | 446C>Y | Substitution | Nonsynonymous coding | 23% |
| MM12T | QPRT        | quinolinate phosphoribosyltransferase                | CCDS10651.1 | chr16_29706503-29706503_G_A   | 178A>T | Substitution | Nonsynonymous coding | 26% |
| MM12T | QRICH2      | glutamine rich 2                                     | CCDS32741.1 | chr17_74288805-74288805_G_T   | 502P>H | Substitution | Nonsynonymous coding | 27% |
| MM12T | QRICH2      | glutamine rich 2                                     | CCDS32741.1 | chr17_74289918-74289918_C_A   | 131G>V | Substitution | Nonsynonymous coding | 37% |
| MM12T | QTRT1       | queuine tRNA-ribosyltransferase 1                    | CCDS12248.1 | chr19_10812796-10812796_G_T   | 106S>I | Substitution | Nonsynonymous coding | 28% |
| MM12T | RAB11FIP2   | RAB11 family interacting protein 2 (class I)         | CCDS7602.1  | chr10_119799882-119799882_G_C | 183T>R | Substitution | Nonsynonymous coding | 31% |
| MM12T | RAB11FIP3   | RAB11 family interacting protein 3 (class II)        | CCDS32351.1 | chr16_570201-570201_G_A       | 647S>N | Substitution | Nonsynonymous coding | 13% |
| MM12T | RAB25       | RAB25, member RAS oncogene family                    | CCDS41413.1 | chr1_156038179-156038179_G_A  | 120V>I | Substitution | Nonsynonymous coding | 29% |
| MM12T | RAB33A      | RAB33A, member RAS oncogene family                   | CCDS14621.1 | chrX_129306160-129306160_A_G  | 42I>V  | Substitution | Nonsynonymous coding | 13% |
| MM12T | RAB35       | RAB35, member RAS oncogene family                    | CCDS41846.1 | chr12_120541733-120541733_C_T | 42G>R  | Substitution | Nonsynonymous coding | 29% |
| MM12T | RAB35       | RAB35, member RAS oncogene family                    | CCDS41846.1 | chr12_120546239-120546239_C_T | 29A>T  | Substitution | Nonsynonymous coding | 28% |
| MM12T | RAB3C       | RAB3C, member RAS oncogene family                    | CCDS3976.1  | chr5_58120900-58120900_C_T    | 136A>V | Substitution | Nonsynonymous coding | 33% |
| MM12T | RAB3GAP1    | RAB3 GTPase activating protein subunit 1 (catalytic) | CCDS33294.1 | chr2_135870731-135870731_C_T  | 125R>C | Substitution | Nonsynonymous coding | 21% |
| MM12T | RAB40C      | RAB40C, member RAS oncogene family                   | CCDS10413.1 | chr16_667204-667204_G_A       | ISV-4> | Substitution | Splice site acceptor | 34% |
| MM12T | RAB41       | RAB41, member RAS oncogene family                    | CCDS35322.1 | chrX_69503127-69503127_C_T    | 83Q>X  | Substitution | Nonsense             | 29% |
| MM12T | RAB4B-EGLN2 | RAB4B-EGLN2 readthrough (non-protein coding)         | CCDS12567.1 | chr19_41306488-41306488_C_T   | 4P>L   | Substitution | Nonsynonymous coding | 43% |
| MM12T | RAB4B-EGLN2 | RAB4B-EGLN2 readthrough (non-protein coding)         | CCDS12567.1 | chr19_41306941-41306941_G_A   | 155S>N | Substitution | Nonsynonymous coding | 17% |
| MM12T | RABEP2      | rabaptin, RAB GTPase binding effector protein 2      | CCDS42140.1 | chr16_28935906-28935906_G_A   | 31A>V  | Substitution | Nonsynonymous coding | 11% |
| MM12T | RABEP2      | rabaptin, RAB GTPase binding effector protein 2      | CCDS42140.1 | chr16_28936420-28936420_G_A   | ISV+4> | Substitution | Splice site donor    | 33% |
| MM12T | RABL5       | RAB, member RAS oncogene family-like 5               | CCDS5719.1  | chr7_100961403-100961403_A_G  | ISV+2> | Substitution | Splice site donor    | 11% |
| MM12T | RABL6       | RAB, member RAS oncogene family-like 6               | CCDS48058.1 | chr9_139731926-139731926_G_A  | 313S>N | Substitution | Nonsynonymous coding | 16% |

|       |          |                                                                                         |                 |                               |         |              |                      |     |
|-------|----------|-----------------------------------------------------------------------------------------|-----------------|-------------------------------|---------|--------------|----------------------|-----|
| MM12T | RABL6    | RAB, member RAS oncogene family-like 6                                                  | CCDS48058.1     | chr9_139734924-139734924_G_A  | 714G>R  | Substitution | Nonsynonymous coding | 42% |
| MM12T | RAC2     | ras-related C3 botulinum toxin substrate 2 (rho family, small GTP binding protein Rac2) | CCDS13945.1     | chr22_37628873-37628873_C_T   | 65D>N   | Substitution | Nonsynonymous coding | 10% |
| MM12T | RACGAP1  | Rac GTPase activating protein 1                                                         | CCDS8795.1      | chr12_50396060-50396060_C_A   | 173K>N  | Substitution | Nonsynonymous coding | 35% |
| MM12T | RAD51C   | RAD51 homolog C (S. cerevisiae)                                                         | CCDS11611.1     | chr17_56774103-56774103_G_A   | 152A>T  | Substitution | Nonsynonymous coding | 26% |
| MM12T | RADIL    | Ras association and DIL domains                                                         | CCDS43544.1     | chr7_4839327-4839327_C_T      | 1019R>H | Substitution | Nonsynonymous coding | 31% |
| MM12T | RAE1     | RAE1 RNA export 1 homolog (S. pombe)                                                    | CCDS13458.1     | chr20_55940486-55940486_A_G   | 121I>M  | Substitution | Nonsynonymous coding | 20% |
| MM12T | RAET1G   | retinoic acid early transcript 1G                                                       | CCDS43514.1     | chr6_150239437-150239437_G_A  | 239L>F  | Substitution | Nonsynonymous coding | 10% |
| MM12T | RAG1     | recombination activating gene 1                                                         | CCDS7902.1      | chr11_36596320-36596320_G_A   | 489R>K  | Substitution | Nonsynonymous coding | 14% |
| MM12T | RAI1     | retinoic acid induced 1                                                                 | CCDS11188.1     | chr17_17697290-17697290_G_A   | 343S>N  | Substitution | Nonsynonymous coding | 19% |
| MM12T | RAI1     | retinoic acid induced 1                                                                 | CCDS11188.1     | chr17_17699740-17699740_C_T   | 1160R>W | Substitution | Nonsynonymous coding | 32% |
| MM12T | RAI1     | retinoic acid induced 1                                                                 | CCDS11188.1     | chr17_17701670-17701670_G_A   | 1803R>H | Substitution | Nonsynonymous coding | 21% |
| MM12T | RAI2     | retinoic acid induced 2                                                                 | CCDS14183.1     | chrX_17819214-17819214_G_A    | 306T>M  | Substitution | Nonsynonymous coding | 29% |
| MM12T | RALB     | v-ral simian leukemia viral oncogene homolog B (ras related; GTP binding protein)       | CCDS2131.1      | chr2_121047263-121047263_G_T  | 144R>M  | Substitution | Nonsynonymous coding | 30% |
| MM12T | RALGAPA2 | Ral GTPase activating protein, alpha subunit 2 (catalytic)                              | CCDS46584.1     | chr20_20565513-20565513_C_A   | 842Q>H  | Substitution | Nonsynonymous coding | 24% |
| MM12T | RALGAPA2 | Ral GTPase activating protein, alpha subunit 2 (catalytic)                              | CCDS46584.1     | chr20_20601192-20601192_G_T   | 439P>H  | Substitution | Nonsynonymous coding | 25% |
| MM12T | RALGDS   | ral guanine nucleotide dissociation stimulator                                          | CCDS6959.1      | chr9_135981407-135981407_T_G  | ISV-4>  | Substitution | Splice site acceptor | 26% |
| MM12T | RANBP10  | RAN binding protein 10                                                                  | CCDS32469.1     | chr16_67763727-67763727_G_A   | 335R>W  | Substitution | Nonsynonymous coding | 26% |
| MM12T | RANBP10  | RAN binding protein 10                                                                  | CCDS32469.1     | chr16_67763844-67763844_A_G   | 332L>P  | Substitution | Nonsynonymous coding | 30% |
| MM12T | RANBP6   | RAN binding protein 6                                                                   | CCDS6467.1      | chr9_6014757-6014757_C_T      | 284R>H  | Substitution | Nonsynonymous coding | 33% |
| MM12T | RAPGEF3  | Rap guanine nucleotide exchange factor (GEF) 3                                          | CCDS41775.1     | chr12_48131828-48131828_C_A   | 877S>I  | Substitution | Nonsynonymous coding | 20% |
| MM12T | RARA     | retinoic acid receptor, alpha                                                           | CCDS11366.1     | chr17_38508601-38508601_C_T   | 217R>C  | Substitution | Nonsynonymous coding | 16% |
| MM12T | RARA     | retinoic acid receptor, alpha                                                           | ENST00000319149 | chr17_38512928-38512928_G_A   | 605R>Q  | Substitution | Nonsynonymous coding | 28% |
| MM12T | RARG     | retinoic acid receptor, gamma                                                           | CCDS8850.1      | chr12_53621312-53621312_C_A   | 6E>D    | Substitution | Nonsynonymous coding | 33% |
| MM12T | RASA1    | RAS p21 protein activator (GTPase activating protein) 1                                 | CCDS34200.1     | chr5_86672333-86672333_A_G    | 712Y>C  | Substitution | Nonsynonymous coding | 33% |
| MM12T | RASA2    | RAS p21 protein activator 2                                                             | CCDS3117.1      | chr3_141292891-141292891_G_A  | 489A>T  | Substitution | Nonsynonymous coding | 24% |
| MM12T | RASA3    | RAS p21 protein activator 3                                                             | ENST00000389544 | chr13_114793308-114793308_C_T | 182R>H  | Substitution | Nonsynonymous coding | 15% |
| MM12T | RASAL1   | RAS protein activator like 1 (GAP1 like)                                                | CCDS9165.1      | chr12_113565961-113565961_G_T | 49L>M   | Substitution | Nonsynonymous coding | 34% |
| MM12T | RASAL2   | RAS protein activator like 2                                                            | CCDS1321.1      | chr1_178410760-178410760_G_A  | 284R>H  | Substitution | Nonsynonymous coding | 15% |
| MM12T | RASAL3   | RAS protein activator like 3                                                            | CCDS46006.1     | chr19_15564994-15564994_G_A   | 749R>C  | Substitution | Nonsynonymous coding | 25% |
| MM12T | RASD2    | RASD family, member 2                                                                   | CCDS13916.1     | chr22_35947834-35947834_C_T   | 186L>F  | Substitution | Nonsynonymous coding | 13% |
| MM12T | RASGEF1A | RasGEF domain family, member 1A                                                         | CCDS7202.2      | chr10_43701551-43701551_G_T   | 5S>Y    | Substitution | Nonsynonymous coding | 30% |
| MM12T | RASGRF1  | Ras protein-specific guanine nucleotide-releasing factor 1                              | CCDS10309.1     | chr15_79324556-79324556_C_T   | 354R>H  | Substitution | Nonsynonymous coding | 12% |

|       |         |                                                                        |             |                               |         |              |                      |     |
|-------|---------|------------------------------------------------------------------------|-------------|-------------------------------|---------|--------------|----------------------|-----|
| MM12T | RASGRF1 | Ras protein-specific guanine nucleotide-releasing factor 1             | CCDS10309.1 | chr15_79277345-79277345_G_A   | ISV>4>  | Substitution | Splice site donor    | 31% |
| MM12T | RASGRF2 | Ras protein-specific guanine nucleotide-releasing factor 2             | CCDS4052.1  | chr5_80476048-80476048_C_T    | 914A>V  | Substitution | Nonsynonymous coding | 13% |
| MM12T | RASIP1  | Ras interacting protein 1                                              | CCDS12731.1 | chr19_49228130-49228130_C_T   | 739A>T  | Substitution | Nonsynonymous coding | 31% |
| MM12T | RASIP1  | Ras interacting protein 1                                              | CCDS12731.1 | chr19_49232268-49232268_C_T   | 587A>T  | Substitution | Nonsynonymous coding | 28% |
| MM12T | RASIP1  | Ras interacting protein 1                                              | CCDS12731.1 | chr19_49242741-49242741_G_A   | 100T>I  | Substitution | Nonsynonymous coding | 26% |
| MM12T | RASSF9  | Ras association (RalGDS/AF-6) domain family (N-terminal) member 9      | CCDS44950.1 | chr12_86198644-86198644_C_T   | 382A>T  | Substitution | Nonsynonymous coding | 11% |
| MM12T | RAVER1  | ribonucleoprotein, PTB-binding 1                                       | CCDS45960.1 | chr19_10434238-10434238_G_A   | 271A>V  | Substitution | Nonsynonymous coding | 32% |
| MM12T | RB1     | retinoblastoma 1                                                       | CCDS31973.1 | chr13_48953760-48953760_C_T   | 455R>X  | Substitution | Nonsense             | 33% |
| MM12T | RB1     | retinoblastoma 1                                                       | CCDS31973.1 | chr13_48955573-48955573_G_A   | 563W>X  | Substitution | Nonsense             | 39% |
| MM12T | RBBP7   | retinoblastoma binding protein 7                                       | CCDS14179.1 | chrX_16871880-16871880_A_G    | 228V>A  | Substitution | Nonsynonymous coding | 34% |
| MM12T | RBBP8NL | RBBP8 N-terminal like                                                  | CCDS13498.1 | chr20_60988517-60988517_G_A   | 539P>S  | Substitution | Nonsynonymous coding | 37% |
| MM12T | RBFOX1  | RNA binding protein, fox-1 homolog (C. elegans) 1                      | CCDS10531.1 | chr16_7721602-7721602_G_A     | ISV+1>  | Substitution | Splice site donor    | 34% |
| MM12T | RBFOX3  | RNA binding protein, fox-1 homolog (C. elegans) 3                      | CCDS45805.1 | chr17_77111662-77111662_T_C   | 46T>A   | Substitution | Nonsynonymous coding | 22% |
| MM12T | RBL1    | retinoblastoma-like 1 (p107)                                           | CCDS13289.1 | chr20_35696592-35696592_A_    | NA      | Deletion     | Splice site acceptor | 43% |
| MM12T | RBL2    | retinoblastoma-like 2 (p130)                                           | CCDS10748.1 | chr16_53496511-53496511_G_A   | 502V>I  | Substitution | Nonsynonymous coding | 38% |
| MM12T | RBL2    | retinoblastoma-like 2 (p130)                                           | CCDS10748.1 | chr16_53524171-53524171_C_T   | 1127R>C | Substitution | Nonsynonymous coding | 10% |
| MM12T | RBM10   | RNA binding motif protein 10                                           | CCDS14274.1 | chrX_47044548-47044548_A_G    | 682D>G  | Substitution | Nonsynonymous coding | 13% |
| MM12T | RBM15   | RNA binding motif protein 15                                           | CCDS822.1   | chr1_110884837-110884837_C_A  | 937A>D  | Substitution | Nonsynonymous coding | 35% |
| MM12T | RBM15B  | RNA binding motif protein 15B                                          | CCDS33764.1 | chr3_51428964-51428964_C_T    | 45A>V   | Substitution | Nonsynonymous coding | 44% |
| MM12T | RBM19   | RNA binding motif protein 19                                           | CCDS9172.1  | chr12_114400045-114400045_G_A | 71R>W   | Substitution | Nonsynonymous coding | 27% |
| MM12T | RBM27   | RNA binding motif protein 27                                           | CCDS43378.1 | chr5_145616986-145616986_G_A  | 424V>I  | Substitution | Nonsynonymous coding | 19% |
| MM12T | RBM43   | RNA binding motif protein 43                                           | CCDS2191.1  | chr2_152108088-152108088_T_   | NA      | Deletion     | Frameshift           | 34% |
| MM12T | RBM44   | RNA binding motif protein 44                                           | CCDS46554.1 | chr2_238725777-238725777_A_G  | 73D>G   | Substitution | Nonsynonymous coding | 26% |
| MM12T | RBM46   | RNA binding motif protein 46                                           | CCDS3790.1  | chr4_155719122-155719122_C_T  | 104A>V  | Substitution | Nonsynonymous coding | 30% |
| MM12T | RBM4B   | RNA binding motif protein 4B                                           | CCDS8149.1  | chr11_66436538-66436538_C_T   | 213D>N  | Substitution | Nonsynonymous coding | 37% |
| MM12T | RBM5    | RNA binding motif protein 5                                            | CCDS2810.1  | chr3_50145738-50145738_G_A    | ISV+1>  | Substitution | Splice site donor    | 28% |
| MM12T | RBMX2   | RNA binding motif protein, X-linked 2                                  | CCDS43993.1 | chrX_129545424-129545424_T_C  | 136C>R  | Substitution | Nonsynonymous coding | 28% |
| MM12T | RBP3    | retinol binding protein 3, interstitial                                | CCDS7218.1  | chr10_48390057-48390057_G_A   | 274S>F  | Substitution | Nonsynonymous coding | 13% |
| MM12T | RBPJ    | recombination signal binding protein for immunoglobulin kappa J region | CCDS3437.1  | chr4_26431638-26431638_C_T    | 349A>V  | Substitution | Nonsynonymous coding | 24% |
| MM12T | RBPMS   | RNA binding protein with multiple splicing                             | CCDS34876.1 | chr8_30361858-30361858_C_T    | 101A>V  | Substitution | Nonsynonymous coding | 27% |
| MM12T | RC3H1   | ring finger and CCCH-type domains 1                                    | CCDS30940.1 | chr1_173933998-173933998_G_A  | 532A>V  | Substitution | Nonsynonymous coding | 30% |
| MM12T | RC3H1   | ring finger and CCCH-type domains 1                                    | CCDS30940.1 | chr1_173952790-173952790_C_A  | 120G>C  | Substitution | Nonsynonymous coding | 24% |



|       |        |                                                               |                 |                              |         |              |                      |     |
|-------|--------|---------------------------------------------------------------|-----------------|------------------------------|---------|--------------|----------------------|-----|
| MM12T | RCAN1  | regulator of calcineurin 1                                    | ENST00000381135 | chr21_35897457-35897457_C_T  | 51D>N   | Substitution | Nonsynonymous coding | 14% |
| MM12T | RCN1   | reticulocalbin 1, EF-hand calcium binding domain              | CCDS7876.1      | chr11_32119904-32119904_G_A  | 153A>T  | Substitution | Nonsynonymous coding | 42% |
| MM12T | RCSD1  | RCS domain containing 1                                       | CCDS1263.1      | chr1_167666450-167666450_G_A | 197G>S  | Substitution | Nonsynonymous coding | 33% |
| MM12T | RD3    | retinal degeneration 3                                        | CCDS1498.1      | chr1_211652610-211652610_C_T | 119R>H  | Substitution | Nonsynonymous coding | 31% |
| MM12T | RECQL4 | RecQ protein-like 4                                           | ENST00000428558 | chr8_145737702-145737702_G_A | 1021R>W | Substitution | Nonsynonymous coding | 33% |
| MM12T | RECQL5 | RecQ protein-like 5                                           | CCDS42380.1     | chr17_73625542-73625542_C_T  | 654R>Q  | Substitution | Nonsynonymous coding | 11% |
| MM12T | RECQL5 | RecQ protein-like 5                                           | CCDS42380.1     | chr17_73654395-73654395_C_T  | 378E>K  | Substitution | Nonsynonymous coding | 15% |
| MM12T | REEP2  | receptor accessory protein 2                                  | CCDS4205.1      | chr5_137781274-137781274_C_T | 226A>V  | Substitution | Nonsynonymous coding | 32% |
| MM12T | REEP6  | receptor accessory protein 6                                  | CCDS12070.1     | chr19_1495338-1495338_C_T    | 54A>V   | Substitution | Nonsynonymous coding | 35% |
| MM12T | REL    | v-rel reticuloendotheliosis viral oncogene homolog (avian)    | CCDS1864.1      | chr2_61149071-61149071_C_T   | 421R>C  | Substitution | Nonsynonymous coding | 24% |
| MM12T | RELA   | v-rel reticuloendotheliosis viral oncogene homolog A (avian)  | CCDS31609.1     | chr11_65422018-65422018_T_C  | 496Y>C  | Substitution | Nonsynonymous coding | 26% |
| MM12T | RELB   | v-rel reticuloendotheliosis viral oncogene homolog B          | CCDS46110.1     | chr19_45515205-45515205_G_A  | 59E>K   | Substitution | Nonsynonymous coding | 30% |
| MM12T | RELB   | v-rel reticuloendotheliosis viral oncogene homolog B          | CCDS46110.1     | chr19_45535860-45535860_C_T  | 354H>Y  | Substitution | Nonsynonymous coding | 29% |
| MM12T | RELB   | v-rel reticuloendotheliosis viral oncogene homolog B          | CCDS46110.1     | chr19_45540956-45540956_G_A  | 550A>T  | Substitution | Nonsynonymous coding | 13% |
| MM12T | RELN   | reelin                                                        | CCDS47680.1     | chr7_103301977-103301977_A_  | NA      | Deletion     | Splice site acceptor | 13% |
| MM12T | RELT   | RELT tumor necrosis factor receptor                           | CCDS8222.1      | chr11_73103393-73103393_G_A  | 169V>I  | Substitution | Nonsynonymous coding | 28% |
| MM12T | RENBP  | renin binding protein                                         | CCDS14738.2     | chrX_153209575-153209575_C_T | 57R>Q   | Substitution | Nonsynonymous coding | 35% |
| MM12T | RERE   | arginine-glutamic acid dipeptide (RE) repeats                 | CCDS95.1        | chr1_8421537-8421537_G_T     | 677P>H  | Substitution | Nonsynonymous coding | 34% |
| MM12T | RESP18 | regulated endocrine-specific protein 18                       | NM_001007089    | chr2_220197434-220197434_G_A | 15A>V   | Substitution | Nonsynonymous coding | 12% |
| MM12T | RET    | ret proto-oncogene                                            | CCDS7200.1      | chr10_43598018-43598018_G_A  | 189R>H  | Substitution | Nonsynonymous coding | 33% |
| MM12T | RETN   | resistin                                                      | CCDS12182.1     | chr19_7734246-7734246_C_A    | 12L>M   | Substitution | Nonsynonymous coding | 36% |
| MM12T | REV1   | REV1, polymerase (DNA directed)                               | CCDS2045.1      | chr2_100055425-100055425_C_T | 284R>K  | Substitution | Nonsynonymous coding | 27% |
| MM12T | REV3L  | REV3-like, polymerase (DNA directed), zeta, catalytic subunit | CCDS5091.2      | chr6_111634552-111634552_T_C | ISV+3>  | Substitution | Splice site donor    | 15% |
| MM12T | REXO1  | REX1, RNA exonuclease 1 homolog (S. cerevisiae)               | CCDS32866.1     | chr19_1827654-1827654_C_A    | 378K>N  | Substitution | Nonsynonymous coding | 35% |
| MM12T | RFPL3  | ret finger protein-like 3                                     | CCDS43011.1     | chr22_32756703-32756703_C_T  | 280R>C  | Substitution | Nonsynonymous coding | 22% |
| MM12T | RFT1   | RFT1 homolog (S. cerevisiae)                                  | CCDS2869.1      | chr3_53126488-53126488_C_T   | 452R>H  | Substitution | Nonsynonymous coding | 29% |
| MM12T | RFX1   | regulatory factor X, 1 (influences HLA class II expression)   | CCDS12301.1     | chr19_14073978-14073978_C_T  | 894V>I  | Substitution | Nonsynonymous coding | 39% |
| MM12T | RFX1   | regulatory factor X, 1 (influences HLA class II expression)   | CCDS12301.1     | chr19_14074749-14074749_G_A  | 761A>V  | Substitution | Nonsynonymous coding | 39% |
| MM12T | RFX8   | RFX family member 8, lacking RFX DNA binding domain           | CCDS46376.1     | chr2_102022446-102022446_G_T | 296A>D  | Substitution | Nonsynonymous coding | 26% |
| MM12T | RFXAP  | regulatory factor X-associated protein                        | CCDS9359.1      | chr13_37393714-37393714_C_A  | 74L>M   | Substitution | Nonsynonymous coding | 25% |
| MM12T | RGAG1  | retrotransposon gag domain containing 1                       | NM_020769       | chrX_109695058-109695058_G_A | 405A>T  | Substitution | Nonsynonymous coding | 30% |
| MM12T | RGMA   | RGM domain family, member A                                   | CCDS45357.1     | chr15_93595602-93595602_G_A  | 89T>M   | Substitution | Nonsynonymous coding | 34% |

|       |         |                                                                     |                 |                               |         |              |                      |     |
|-------|---------|---------------------------------------------------------------------|-----------------|-------------------------------|---------|--------------|----------------------|-----|
| MM12T | RGMB    | RGM domain family, member B                                         | CCDS47251.1     | chr5_98115755-98115755_C_A    | 244P>H  | Substitution | Nonsynonymous coding | 26% |
| MM12T | RGP1    | RGP1 retrograde golgi transport homolog (S. cerevisiae)             | CCDS47964.1     | chr9_35752663-35752663_G_T    | 363R>I  | Substitution | Nonsynonymous coding | 27% |
| MM12T | RGS11   | regulator of G-protein signaling 11                                 | CCDS42088.1     | chr16_321398-321398_G_A       | 250A>V  | Substitution | Nonsynonymous coding | 27% |
| MM12T | RGS12   | regulator of G-protein signaling 12                                 | CCDS3366.1      | chr4_3319227-3319227_G_T      | 444G>C  | Substitution | Nonsynonymous coding | 34% |
| MM12T | RGS12   | regulator of G-protein signaling 12                                 | CCDS3366.1      | chr4_3424680-3424680_C_T      | 1028R>C | Substitution | Nonsynonymous coding | 28% |
| MM12T | RGS6    | regulator of G-protein signaling 6                                  | CCDS9808.1      | chr14_72985207-72985207_G_A   | 414V>I  | Substitution | Nonsynonymous coding | 27% |
| MM12T | RHBDL3  | rhomboid, veinlet-like 3 (Drosophila)                               | CCDS32613.1     | chr17_30615823-30615823_C_T   | 103R>C  | Substitution | Nonsynonymous coding | 34% |
| MM12T | RHBDL3  | rhomboid, veinlet-like 3 (Drosophila)                               | CCDS32613.1     | chr17_30643288-30643288_G_A   | 307R>Q  | Substitution | Nonsynonymous coding | 29% |
| MM12T | RHBG    | Rh family, B glycoprotein (gene/pseudogene)                         | ENST00000255013 | chr1_156354348-156354348_C_   | NA      | Deletion     | Splice site acceptor | 12% |
| MM12T | RHOBTB1 | Rho-related BTB domain containing 1                                 | CCDS7261.1      | chr10_62631293-62631293_G_A   | 680H>Y  | Substitution | Nonsynonymous coding | 34% |
| MM12T | RHOF    | ras homolog family member F (in filopodia)                          | CCDS9222.1      | chr12_122219045-122219045_C_T | 94V>M   | Substitution | Nonsynonymous coding | 31% |
| MM12T | RHOG    | ras homolog family member G                                         | CCDS7748.1      | chr11_3849035-3849035_G_T     | 112L>M  | Substitution | Nonsynonymous coding | 28% |
| MM12T | RHOT1   | ras homolog family member T1                                        | CCDS32610.1     | chr17_30530949-30530949_C_T   | 458A>V  | Substitution | Nonsynonymous coding | 18% |
| MM12T | RHOU    | ras homolog family member U                                         | CCDS1575.1      | chr1_228879404-228879404_C_T  | 232P>S  | Substitution | Nonsynonymous coding | 31% |
| MM12T | RIC8A   | resistance to inhibitors of cholinesterase 8 homolog A (C. elegans) | CCDS7690.1      | chr11_209809-209809_C_T       | 179R>C  | Substitution | Nonsynonymous coding | 31% |
| MM12T | RIF1    | RAP1 interacting factor homolog (yeast)                             | CCDS2194.1      | chr2_152320139-152320139_G_A  | 1369E>K | Substitution | Nonsynonymous coding | 14% |
| MM12T | RIMS1   | regulating synaptic membrane exocytosis 1                           | CCDS47449.1     | chr6_72892114-72892114_C_T    | 314R>W  | Substitution | Nonsynonymous coding | 11% |
| MM12T | RIMS4   | regulating synaptic membrane exocytosis 4                           | CCDS13338.1     | chr20_43386308-43386308_G_A   | ISV+3>  | Substitution | Splice site donor    | 13% |
| MM12T | RIOK1   | RIO kinase 1                                                        | CCDS4500.1      | chr6_7410620-7410620_C_T      | 402A>V  | Substitution | Nonsynonymous coding | 17% |
| MM12T | RIOK3   | RIO kinase 3                                                        | CCDS11877.1     | chr18_21044050-21044050_A_    | NA      | Deletion     | Frameshift           | 19% |
| MM12T | RIOK3   | RIO kinase 3                                                        | CCDS11877.1     | chr18_21043043-21043043_C_T   | 60A>V   | Substitution | Nonsynonymous coding | 32% |
| MM12T | RIOK3   | RIO kinase 3                                                        | CCDS11877.1     | chr18_21054975-21054975_G_A   | 359M>I  | Substitution | Nonsynonymous coding | 29% |
| MM12T | RIPK1   | receptor (TNFRSF)-interacting serine-threonine kinase 1             | CCDS4482.1      | chr6_3113365-3113365_G_A      | 603R>H  | Substitution | Nonsynonymous coding | 21% |
| MM12T | RIT2    | Ras-like without CAAX 2                                             | CCDS11921.1     | chr18_40503620-40503620_C_T   | 115E>K  | Substitution | Nonsynonymous coding | 13% |
| MM12T | RNASE9  | ribonuclease, RNase A family, 9 (non-active)                        | CCDS32036.1     | chr14_21024693-21024693_G_T   | 179P>H  | Substitution | Nonsynonymous coding | 48% |
| MM12T | RNASEL  | ribonuclease L (2',5'-oligoadenylate synthetase-dependent)          | CCDS1347.1      | chr1_182555743-182555743_C_T  | 67V>I   | Substitution | Nonsynonymous coding | 10% |
| MM12T | RND1    | Rho family GTPase 1                                                 | CCDS8771.1      | chr12_49251840-49251840_C_T   | 213R>H  | Substitution | Nonsynonymous coding | 12% |
| MM12T | RNF111  | ring finger protein 111                                             | CCDS10169.1     | chr15_59384761-59384761_G_A   | 922G>E  | Substitution | Nonsynonymous coding | 15% |
| MM12T | RNF112  | ring finger protein 112                                             | NM_007148       | chr17_19316270-19316270_C_T   | 134A>V  | Substitution | Nonsynonymous coding | 19% |
| MM12T | RNF114  | ring finger protein 114                                             | CCDS33482.1     | chr20_48565860-48565860_C_T   | 197R>C  | Substitution | Nonsynonymous coding | 29% |
| MM12T | RNF123  | ring finger protein 123                                             | ENST00000389066 | chr3_49758847-49758847_C_T    | 1296S>F | Substitution | Nonsynonymous coding | 32% |
| MM12T | RNF169  | ring finger protein 169                                             | CCDS41691.1     | chr11_74547680-74547680_C_T   | 678R>C  | Substitution | Nonsynonymous coding | 33% |

|       |               |                                                            |                 |                               |         |              |                      |     |
|-------|---------------|------------------------------------------------------------|-----------------|-------------------------------|---------|--------------|----------------------|-----|
| MM12T | RNF20         | ring finger protein 20, E3 ubiquitin protein ligase        | CCDS35084.1     | chr9_104312979-104312979_G_T  | 395S>I  | Substitution | Nonsynonymous coding | 30% |
| MM12T | RNF20         | ring finger protein 20, E3 ubiquitin protein ligase        | CCDS35084.1     | chr9_104323422-104323422_G_T  | 853L>F  | Substitution | Nonsynonymous coding | 31% |
| MM12T | RNF212        | ring finger protein 212                                    | ENST00000333673 | chr4_1087643-1087643_G_A      | 136R>W  | Substitution | Nonsynonymous coding | 28% |
| MM12T | RNF213        | ring finger protein 213                                    | CCDS11772.1     | chr17_78265581-78265581_G_A   | 476V>I  | Substitution | Nonsynonymous coding | 28% |
| MM12T | RNF213        | ring finger protein 213                                    | CCDS32761.1     | chr17_78320404-78320404_G_A   | 830V>I  | Substitution | Nonsynonymous coding | 25% |
| MM12T | RNF213        | ring finger protein 213                                    | CCDS32761.1     | chr17_78327405-78327405_C_A   | 1579A>D | Substitution | Nonsynonymous coding | 14% |
| MM12T | RNF214        | ring finger protein 214                                    | CCDS41720.1     | chr11_117153241-117153241_G_A | 612A>T  | Substitution | Nonsynonymous coding | 13% |
| MM12T | RNF219        | ring finger protein 219                                    | CCDS31997.1     | chr13_79191198-79191198_G_A   | 233T>I  | Substitution | Nonsynonymous coding | 13% |
| MM12T | RNF219        | ring finger protein 219                                    | CCDS31997.1     | chr13_79191220-79191220_C_T   | 226V>I  | Substitution | Nonsynonymous coding | 27% |
| MM12T | RNF25         | ring finger protein 25                                     | CCDS2420.1      | chr2_219529140-219529140_G_T  | 307P>H  | Substitution | Nonsynonymous coding | 20% |
| MM12T | RNF39         | ring finger protein 39                                     | CCDS4673.1      | chr6_30040952-30040952_T_     | NA      | Deletion     | Frameshift           | 22% |
| MM12T | RNF4          | ring finger protein 4                                      | CCDS47001.1     | chr4_2498785-2498785_C_T      | 21R>W   | Substitution | Nonsynonymous coding | 27% |
| MM12T | RNF40         | ring finger protein 40, E3 ubiquitin protein ligase        | CCDS10691.1     | chr16_30779231-30779231_G_T   | 482E>D  | Substitution | Nonsynonymous coding | 13% |
| MM12T | RNF41         | ring finger protein 41                                     | CCDS8909.1      | chr12_56601955-56601955_C_T   | 164A>T  | Substitution | Nonsynonymous coding | 14% |
| MM12T | RNF44         | ring finger protein 44                                     | CCDS4404.1      | chr5_175956649-175956649_C_T  | ISV-4>  | Substitution | Splice site acceptor | 29% |
| MM12T | RNF8          | ring finger protein 8, E3 ubiquitin protein ligase         | CCDS4834.1      | chr6_37336779-37336779_T_C    | 254S>P  | Substitution | Nonsynonymous coding | 23% |
| MM12T | RNFT1         | ring finger protein, transmembrane 1                       | CCDS11622.2     | chr17_58040311-58040311_C_T   | 131A>T  | Substitution | Nonsynonymous coding | 11% |
| MM12T | RNMTL1        | RNA methyltransferase like 1                               | CCDS10997.1     | chr17_694821-694821_G_A       | 259A>T  | Substitution | Nonsynonymous coding | 42% |
| MM12T | ROBO1         | roundabout, axon guidance receptor, homolog 1 (Drosophila) | CCDS46872.1     | chr3_78683103-78683103_G_A    | 1116R>W | Substitution | Nonsynonymous coding | 24% |
| MM12T | ROBO1         | roundabout, axon guidance receptor, homolog 1 (Drosophila) | CCDS46872.1     | chr3_78717195-78717195_C_T    | 563A>T  | Substitution | Nonsynonymous coding | 21% |
| MM12T | ROBO1         | roundabout, axon guidance receptor, homolog 1 (Drosophila) | CCDS46872.1     | chr3_78988044-78988044_C_T    | 30R>H   | Substitution | Nonsynonymous coding | 22% |
| MM12T | ROBO2         | roundabout, axon guidance receptor, homolog 2 (Drosophila) | CCDS43109.1     | chr3_77147399-77147399_G_A    | 99R>H   | Substitution | Nonsynonymous coding | 15% |
| MM12T | ROBO2         | roundabout, axon guidance receptor, homolog 2 (Drosophila) | CCDS43109.1     | chr3_77617566-77617566_C_T    | 651T>M  | Substitution | Nonsynonymous coding | 22% |
| MM12T | ROR2          | receptor tyrosine kinase-like orphan receptor 2            | CCDS6691.1      | chr9_94488950-94488950_C_T    | 420C>Y  | Substitution | Nonsynonymous coding | 27% |
| MM12T | ROS1          | c-ros oncogene 1, receptor tyrosine kinase                 | CCDS5116.1      | chr6_117658370-117658370_T_   | NA      | Deletion     | Frameshift           | 14% |
| MM12T | ROS1          | c-ros oncogene 1, receptor tyrosine kinase                 | CCDS5116.1      | chr6_117704649-117704649_G_A  | 776T>M  | Substitution | Nonsynonymous coding | 20% |
| MM12T | RP1           | retinitis pigmentosa 1 (autosomal dominant)                | CCDS6160.1      | chr8_55533531-55533531_G_T    | 2S>I    | Substitution | Nonsynonymous coding | 34% |
| MM12T | RP1           | retinitis pigmentosa 1 (autosomal dominant)                | CCDS6160.1      | chr8_55538993-55538993_G_A    | 851A>T  | Substitution | Nonsynonymous coding | 11% |
| MM12T | RP11-158D1.1  | -                                                          | ENST00000402782 | chr8_36746190-36746190_C_T    | 53T>M   | Substitution | Nonsynonymous coding | 29% |
| MM12T | RP11-218M22.1 | -                                                          | ENST00000318291 | chr12_752358-752358_G_T       | 71G>W   | Substitution | Nonsynonymous coding | 39% |
| MM12T | RP11-286H14.4 | -                                                          | ENST00000423578 | chr7_128767415-128767415_G_A  | 282V>M  | Substitution | Nonsynonymous coding | 14% |
| MM12T | RP1-139D8.6   | -                                                          | ENST00000372963 | chr6_42130833-42130833_G_T    | 64R>M   | Substitution | Nonsynonymous coding | 26% |

|       |                |                                                                |                 |                               |         |              |                      |     |
|-------|----------------|----------------------------------------------------------------|-----------------|-------------------------------|---------|--------------|----------------------|-----|
| MM12T | RP11-408E5.4   | -                                                              | ENST00000240700 | chr13_19759474-19759474_C_A   | 9L>M    | Substitution | Nonsynonymous coding | 11% |
| MM12T | RP11-616M22.6  | -                                                              | ENST00000334002 | chr16_1312460-1312460_G_A     | 199A>V  | Substitution | Nonsynonymous coding | 12% |
| MM12T | RP1L1          | retinitis pigmentosa 1-like 1                                  | CCDS43708.1     | chr8_10480498-10480498_C_T    | 72V>M   | Substitution | Nonsynonymous coding | 36% |
| MM12T | RP2            | retinitis pigmentosa 2 (X-linked recessive)                    | CCDS14270.1     | chrX_46736976-46736976_C_T    | 307A>V  | Substitution | Nonsynonymous coding | 12% |
| MM12T | RPA4           | replication protein A4, 30kDa                                  | CCDS35345.1     | chrX_96140070-96140070_G_A    | 254R>Q  | Substitution | Nonsynonymous coding | 33% |
| MM12T | RPH3AL         | rabphilin 3A-like (without C2 domains)                         | CCDS10994.1     | chr17_65506-65506_G_A         | 272T>M  | Substitution | Nonsynonymous coding | 24% |
| MM12T | RPIA           | ribose 5-phosphate isomerase A                                 | CCDS2004.2      | chr2_89036135-89036135_G_A    | 227R>Q  | Substitution | Nonsynonymous coding | 27% |
| MM12T | RPL3           | ribosomal protein L3                                           | CCDS13988.1     | chr22_39710177-39710177_C_T   | 296G>S  | Substitution | Nonsynonymous coding | 48% |
| MM12T | RPN1           | ribophorin I                                                   | CCDS3051.1      | chr3_128348989-128348989_G_A  | ISV-3>  | Substitution | Splice site acceptor | 40% |
| MM12T | RPP25L         | ribonuclease P/MRP 25kDa subunit-like                          | CCDS6559.1      | chr9_34610872-34610872_C_T    | 141G>D  | Substitution | Nonsynonymous coding | 14% |
| MM12T | RPP30          | ribonuclease P/MRP 30kDa subunit                               | CCDS44458.1     | chr10_92638842-92638842_G_A   | 98R>Q   | Substitution | Nonsynonymous coding | 25% |
| MM12T | RPP38          | ribonuclease P/MRP 38kDa subunit                               | CCDS7108.1      | chr10_15145436-15145436_G_A   | 41M>I   | Substitution | Nonsynonymous coding | 34% |
| MM12T | RPP38          | ribonuclease P/MRP 38kDa subunit                               | CCDS7108.1      | chr10_15146010-15146010_G_A   | 233D>N  | Substitution | Nonsynonymous coding | 34% |
| MM12T | RPRD1A         | regulation of nuclear pre-mRNA domain containing 1A            | CCDS11917.1     | chr18_33573253-33573253_C_T   | 267R>H  | Substitution | Nonsynonymous coding | 30% |
| MM12T | RPS10          | ribosomal protein S10                                          | CCDS4792.1      | chr6_34386157-34386157_C_T    | 149E>K  | Substitution | Nonsynonymous coding | 13% |
| MM12T | RPS27L         | ribosomal protein S27-like                                     | CCDS42048.1     | chr15_63447933-63447934_AA_   | NA      | Deletion     | Splice site acceptor | 13% |
| MM12T | RPS29          | ribosomal protein S29                                          | CCDS9685.1      | chr14_50050397-50050397_A_    | NA      | Deletion     | Splice site acceptor | 35% |
| MM12T | RPS6KC1        | ribosomal protein S6 kinase, 52kDa, polypeptide 1              | CCDS1513.1      | chr1_213436139-213436139_G_A  | 1024A>T | Substitution | Nonsynonymous coding | 22% |
| MM12T | RPTOR          | regulatory associated protein of MTOR, complex 1               | CCDS11773.1     | chr17_78867626-78867626_C_T   | 788R>C  | Substitution | Nonsynonymous coding | 52% |
| MM12T | RPTOR          | regulatory associated protein of MTOR, complex 1               | CCDS11773.1     | chr17_78897477-78897477_C_T   | ISV+4>  | Substitution | Splice site donor    | 43% |
| MM12T | RPUSD3         | RNA pseudouridylylase domain containing 3                      | CCDS2586.2      | chr3_9879720-9879720_G_T      | 346L>M  | Substitution | Nonsynonymous coding | 24% |
| MM12T | RRAD           | Ras-related associated with diabetes                           | CCDS10824.1     | chr16_66956073-66956073_G_A   | 278A>V  | Substitution | Nonsynonymous coding | 14% |
| MM12T | RRBP1          | ribosome binding protein 1                                     | ENST00000246043 | chr20_17639530-17639530_C_A   | 541E>D  | Substitution | Nonsynonymous coding | 29% |
| MM12T | RREB1          | ras responsive element binding protein 1                       | CCDS34335.1     | chr6_7230755-7230755_A_G      | 808H>R  | Substitution | Nonsynonymous coding | 19% |
| MM12T | RRM1           | ribonucleotide reductase M1                                    | CCDS7750.1      | chr11_4132840-4132840_C_T     | 153R>W  | Substitution | Nonsynonymous coding | 25% |
| MM12T | RRP8           | ribosomal RNA processing 8, methyltransferase, homolog (yeast) | CCDS31411.1     | chr11_6621781-6621781_G_A     | 396R>C  | Substitution | Nonsynonymous coding | 16% |
| MM12T | RSAD2          | radical S-adenosyl methionine domain containing 2              | CCDS1656.1      | chr2_7023597-7023597_C_T      | 148R>W  | Substitution | Nonsynonymous coding | 27% |
| MM12T | RSF1           | remodeling and spacing factor 1                                | CCDS8253.1      | chr11_77387970-77387970_C_T   | 1070E>K | Substitution | Nonsynonymous coding | 13% |
| MM12T | RTDR1          | rhabdoid tumor deletion region gene 1                          | CCDS13803.1     | chr22_23481133-23481133_G_    | NA      | Deletion     | Splice site acceptor | 15% |
| MM12T | RTEL1-TNFRSF6B | RTEL1-TNFRSF6B readthrough (non-protein coding)                | CCDS13530.2     | chr20_62324312-62324312_G_A   | 936G>D  | Substitution | Nonsynonymous coding | 15% |
| MM12T | RTL1           | retrotransposon-like 1                                         | NM_001134888    | chr14_101347828-101347828_G_A | 1100R>C | Substitution | Nonsynonymous coding | 33% |
| MM12T | RTN4RL1        | reticulum 4 receptor-like 1                                    | CCDS45569.1     | chr17_1840943-1840943_C_T     | 58R>H   | Substitution | Nonsynonymous coding | 32% |

|       |         |                                                                            |             |                              |         |              |                      |     |
|-------|---------|----------------------------------------------------------------------------|-------------|------------------------------|---------|--------------|----------------------|-----|
| MM12T | RTP3    | receptor (chemosensory) transporter protein 3                              | CCDS2740.1  | chr3_46539703-46539703_G_A   | 51A>T   | Substitution | Nonsynonymous coding | 34% |
| MM12T | RUFY1   | RUN and FYVE domain containing 1                                           | CCDS4445.2  | chr5_178987025-178987025_G_A | ISV-1>  | Substitution | Splice site acceptor | 38% |
| MM12T | RUFY2   | RUN and FYVE domain containing 2                                           | CCDS41534.1 | chr10_70141029-70141029_T_C  | 391E>G  | Substitution | Nonsynonymous coding | 27% |
| MM12T | RUNDC3B | RUN domain containing 3B                                                   | CCDS5609.1  | chr7_87258194-87258194_G_T   | 19G>C   | Substitution | Nonsynonymous coding | 47% |
| MM12T | RUNX1T1 | runt-related transcription factor 1; translocated to, 1 (cyclin D-related) | CCDS6256.1  | chr8_92983013-92983013_G_A   | 471A>V  | Substitution | Nonsynonymous coding | 34% |
| MM12T | RUNX1T1 | runt-related transcription factor 1; translocated to, 1 (cyclin D-related) | CCDS6256.1  | chr8_93029555-93029555_G_A   | 42P>L   | Substitution | Nonsynonymous coding | 20% |
| MM12T | RUNX3   | runt-related transcription factor 3                                        | CCDS30633.1 | chr1_25254068-25254068_G_A   | 160R>X  | Substitution | Nonsense             | 30% |
| MM12T | RUSC2   | RUN and SH3 domain containing 2                                            | CCDS35008.1 | chr9_35547974-35547974_C_    | NA      | Deletion     | Frameshift           | 30% |
| MM12T | RXFP4   | relaxin/insulin-like family peptide receptor 4                             | CCDS1124.1  | chr1_155912143-155912143_G_A | 215V>M  | Substitution | Nonsynonymous coding | 38% |
| MM12T | RXRA    | retinoid X receptor, alpha                                                 | CCDS35172.1 | chr9_137325971-137325971_G_A | 387A>T  | Substitution | Nonsynonymous coding | 10% |
| MM12T | RYR1    | ryanodine receptor 1 (skeletal)                                            | CCDS33011.1 | chr19_38955326-38955326_C_T  | 945A>V  | Substitution | Nonsynonymous coding | 31% |
| MM12T | RYR1    | ryanodine receptor 1 (skeletal)                                            | CCDS33011.1 | chr19_38956813-38956813_G_A  | 985D>N  | Substitution | Nonsynonymous coding | 19% |
| MM12T | RYR1    | ryanodine receptor 1 (skeletal)                                            | CCDS33011.1 | chr19_38964299-38964299_G_T  | 1350G>W | Substitution | Nonsynonymous coding | 30% |
| MM12T | RYR1    | ryanodine receptor 1 (skeletal)                                            | CCDS33011.1 | chr19_38995416-38995416_C_T  | 2699A>V | Substitution | Nonsynonymous coding | 24% |
| MM12T | RYR2    | ryanodine receptor 2 (cardiac)                                             | NM_001035   | chr1_237754125-237754125_G_T | 1331K>N | Substitution | Nonsynonymous coding | 33% |
| MM12T | RYR2    | ryanodine receptor 2 (cardiac)                                             | NM_001035   | chr1_23777701-23777701_G_T   | 1758R>M | Substitution | Nonsynonymous coding | 32% |
| MM12T | RYR2    | ryanodine receptor 2 (cardiac)                                             | NM_001035   | chr1_237863590-237863590_G_A | 3064A>T | Substitution | Nonsynonymous coding | 36% |
| MM12T | RYR3    | ryanodine receptor 3                                                       | CCDS45210.1 | chr15_33858978-33858978_G_T  | 416A>S  | Substitution | Nonsynonymous coding | 26% |
| MM12T | RYR3    | ryanodine receptor 3                                                       | CCDS45210.1 | chr15_33872308-33872308_G_A  | 467R>H  | Substitution | Nonsynonymous coding | 13% |
| MM12T | RYR3    | ryanodine receptor 3                                                       | CCDS45210.1 | chr15_33916084-33916084_G_T  | 812A>S  | Substitution | Nonsynonymous coding | 12% |
| MM12T | RYR3    | ryanodine receptor 3                                                       | CCDS45210.1 | chr15_33952600-33952600_C_T  | 1533A>V | Substitution | Nonsynonymous coding | 15% |
| MM12T | RYR3    | ryanodine receptor 3                                                       | CCDS45210.1 | chr15_34105762-34105762_C_T  | 3495P>L | Substitution | Nonsynonymous coding | 34% |
| MM12T | RYR3    | ryanodine receptor 3                                                       | CCDS45210.1 | chr15_34113005-34113005_A_C  | 3603T>P | Substitution | Nonsynonymous coding | 39% |
| MM12T | RYR3    | ryanodine receptor 3                                                       | CCDS45210.1 | chr15_34118889-34118889_G_T  | 3727Q>H | Substitution | Nonsynonymous coding | 12% |
| MM12T | RYR3    | ryanodine receptor 3                                                       | CCDS45210.1 | chr15_34130273-34130273_G_A  | 4031R>H | Substitution | Nonsynonymous coding | 26% |
| MM12T | S100A4  | S100 calcium binding protein A4                                            | CCDS1042.1  | chr1_153516336-153516336_C_T | 69E>K   | Substitution | Nonsynonymous coding | 35% |
| MM12T | S100A8  | S100 calcium binding protein A8                                            | CCDS1038.1  | chr1_153362927-153362927_C_T | 29V>I   | Substitution | Nonsynonymous coding | 12% |
| MM12T | S100PBP | S100P binding protein                                                      | CCDS30666.1 | chr1_33291910-33291910_G_T   | 70E>D   | Substitution | Nonsynonymous coding | 30% |
| MM12T | SAC3D1  | SAC3 domain containing 1                                                   | CCDS41668.1 | chr11_64811935-64811935_G_T  | 271Q>H  | Substitution | Nonsynonymous coding | 17% |
| MM12T | SACS    | spastic ataxia of Charlevoix-Saguenay (sacsin)                             | CCDS9300.2  | chr13_23910773-23910773_C_A  | 2414K>N | Substitution | Nonsynonymous coding | 29% |
| MM12T | SACS    | spastic ataxia of Charlevoix-Saguenay (sacsin)                             | CCDS9300.2  | chr13_23913201-23913201_C_A  | 1605S>I | Substitution | Nonsynonymous coding | 38% |
| MM12T | SACS    | spastic ataxia of Charlevoix-Saguenay (sacsin)                             | CCDS9300.2  | chr13_23913213-23913213_T_C  | 1601K>R | Substitution | Nonsynonymous coding | 22% |

|       |        |                                                       |                 |                              |         |              |                      |     |
|-------|--------|-------------------------------------------------------|-----------------|------------------------------|---------|--------------|----------------------|-----|
| MM12T | SACS   | spastic ataxia of Charlevoix-Saguenay (sacsin)        | CCDS9300.2      | chr13_23929628-23929628_C_T  | 375V>I  | Substitution | Nonsynonymous coding | 40% |
| MM12T | SAFB2  | scaffold attachment factor B2                         | CCDS32879.1     | chr19_5590343-5590343_C_     | NA      | Deletion     | Frameshift           | 34% |
| MM12T | SAG    | S-antigen; retina and pineal gland (arrestin)         | CCDS46545.1     | chr2_234229332-234229332_G_A | 80G>S   | Substitution | Nonsynonymous coding | 10% |
| MM12T | SALL4  | sal-like 4 (Drosophila)                               | CCDS13438.1     | chr20_50408036-50408036_C_T  | 329R>H  | Substitution | Nonsynonymous coding | 15% |
| MM12T | SAMD15 | sterile alpha motif domain containing 15              | CCDS32126.1     | chr14_77844579-77844579_G_A  | 273S>N  | Substitution | Nonsynonymous coding | 31% |
| MM12T | SAMD15 | sterile alpha motif domain containing 15              | CCDS32126.1     | chr14_77857406-77857406_G_A  | 615R>H  | Substitution | Nonsynonymous coding | 26% |
| MM12T | SAMD15 | sterile alpha motif domain containing 15              | CCDS32126.1     | chr14_77857466-77857466_C_T  | 635T>I  | Substitution | Nonsynonymous coding | 37% |
| MM12T | SAMD4A | sterile alpha motif domain containing 4A              | CCDS32084.1     | chr14_55218188-55218188_G_T  | 369R>I  | Substitution | Nonsynonymous coding | 16% |
| MM12T | SAMD9L | sterile alpha motif domain containing 9-like          | CCDS34681.1     | chr7_92762115-92762115_G_A   | 1057P>L | Substitution | Nonsynonymous coding | 19% |
| MM12T | SARM1  | sterile alpha and TIR motif containing 1              | ENST00000379061 | chr17_26711876-26711876_G_A  | 439D>N  | Substitution | Nonsynonymous coding | 10% |
| MM12T | SARNP  | SAP domain containing ribonucleoprotein               | CCDS8892.1      | chr12_56182900-56182900_C_T  | 154A>T  | Substitution | Nonsynonymous coding | 12% |
| MM12T | SART1  | squamous cell carcinoma antigen recognized by T cells | CCDS31611.1     | chr11_65731993-65731993_C_T  | 127R>W  | Substitution | Nonsynonymous coding | 27% |
| MM12T | SART1  | squamous cell carcinoma antigen recognized by T cells | CCDS31611.1     | chr11_65734851-65734851_C_T  | 437S>F  | Substitution | Nonsynonymous coding | 14% |
| MM12T | SART1  | squamous cell carcinoma antigen recognized by T cells | CCDS31611.1     | chr11_65735239-65735239_C_T  | 507R>C  | Substitution | Nonsynonymous coding | 35% |
| MM12T | SART1  | squamous cell carcinoma antigen recognized by T cells | CCDS31611.1     | chr11_65743942-65743942_C_T  | 550A>V  | Substitution | Nonsynonymous coding | 29% |
| MM12T | SART1  | squamous cell carcinoma antigen recognized by T cells | CCDS31611.1     | chr11_65745258-65745258_G_A  | 687R>Q  | Substitution | Nonsynonymous coding | 16% |
| MM12T | SART1  | squamous cell carcinoma antigen recognized by T cells | CCDS31611.1     | chr11_65735248-65735248_C_T  | 510R>X  | Substitution | Nonsense             | 28% |
| MM12T | SATB1  | SATB homeobox 1                                       | CCDS2631.1      | chr3_18390691-18390691_T_G   | 755T>P  | Substitution | Nonsynonymous coding | 18% |
| MM12T | SATB1  | SATB homeobox 1                                       | CCDS2631.1      | chr3_18436124-18436124_A_T   | 346Y>N  | Substitution | Nonsynonymous coding | 11% |
| MM12T | SATB1  | SATB homeobox 1                                       | CCDS2631.1      | chr3_18462281-18462281_G_A   | 60S>L   | Substitution | Nonsynonymous coding | 15% |
| MM12T | SAYSD1 | SAYSVFN motif domain containing 1                     | CCDS4840.1      | chr6_39082757-39082757_C_T   | 37A>T   | Substitution | Nonsynonymous coding | 24% |
| MM12T | SBF2   | SET binding factor 2                                  | CCDS31427.1     | chr11_10051426-10051426_C_T  | ISV-4>  | Substitution | Splice site acceptor | 32% |
| MM12T | SBK1   | SH3-binding domain kinase 1                           | CCDS32416.1     | chr16_28328800-28328800_C_T  | 30P>S   | Substitution | Nonsynonymous coding | 27% |
| MM12T | SBK2   | SH3-binding domain kinase family, member 2            | CCDS42631.1     | chr19_56041302-56041302_G_A  | 282A>V  | Substitution | Nonsynonymous coding | 20% |
| MM12T | SBK2   | SH3-binding domain kinase family, member 2            | CCDS42631.1     | chr19_56041618-56041618_G_A  | 177R>C  | Substitution | Nonsynonymous coding | 38% |
| MM12T | SBNO1  | strawberry notch homolog 1 (Drosophila)               | CCDS9246.1      | chr12_123805365-123805365_T  | NA      | Insertion    | Frameshift           | 15% |
| MM12T | SBNO2  | strawberry notch homolog 2 (Drosophila)               | CCDS45894.1     | chr19_1123541-1123541_G_A    | 207P>L  | Substitution | Nonsynonymous coding | 26% |
| MM12T | SCAF11 | SR-related CTD-associated factor 11                   | CCDS8748.2      | chr12_46321116-46321116_G_A  | 790R>X  | Substitution | Nonsense             | 29% |
| MM12T | SCAF8  | SR-related CTD-associated factor 8                    | CCDS5247.1      | chr6_155154099-155154099_G_A | 1129R>Q | Substitution | Nonsynonymous coding | 40% |
| MM12T | SCAMP2 | secretory carrier membrane protein 2                  | CCDS10271.1     | chr15_75143713-75143713_C_T  | 151M>I  | Substitution | Nonsynonymous coding | 33% |
| MM12T | SCAND3 | SCAN domain containing 3                              | CCDS34355.1     | chr6_28543263-28543263_G_A   | 407R>W  | Substitution | Nonsynonymous coding | 45% |
| MM12T | SCARB2 | scavenger receptor class B, member 2                  | CCDS3577.1      | chr4_77134578-77134578_A_G   | ISV+2>  | Substitution | Splice site donor    | 28% |

|       |        |                                                         |             |                               |         |              |                      |     |
|-------|--------|---------------------------------------------------------|-------------|-------------------------------|---------|--------------|----------------------|-----|
| MM12T | SCARF1 | scavenger receptor class F, member 1                    | CCDS11007.1 | chr17_1547201-1547201_C_T     | 109G>D  | Substitution | Nonsynonymous coding | 37% |
| MM12T | SCARF1 | scavenger receptor class F, member 1                    | CCDS11007.1 | chr17_1547222-1547222_C_T     | 102S>N  | Substitution | Nonsynonymous coding | 13% |
| MM12T | SCD    | stearoyl-CoA desaturase (delta-9-desaturase)            | CCDS7493.1  | chr10_102112174-102112174_G_A | 121R>H  | Substitution | Nonsynonymous coding | 18% |
| MM12T | SCFD1  | sec1 family domain containing 1                         | CCDS9639.1  | chr14_31097426-31097426_C_T   | 25R>C   | Substitution | Nonsynonymous coding | 23% |
| MM12T | SCG2   | secretogranin II                                        | CCDS2457.1  | chr2_224462179-224462179_G_A  | 608H>Y  | Substitution | Nonsynonymous coding | 23% |
| MM12T | SCG2   | secretogranin II                                        | CCDS2457.1  | chr2_224462425-224462425_G_A  | 526R>X  | Substitution | Nonsense             | 28% |
| MM12T | SCG3   | secretogranin III                                       | CCDS10142.1 | chr15_51980558-51980558_G_A   | 167V>M  | Substitution | Nonsynonymous coding | 14% |
| MM12T | SCIN   | scinderin                                               | CCDS47545.1 | chr7_12620722-12620722_C_T    | 131T>M  | Substitution | Nonsynonymous coding | 28% |
| MM12T | SCIN   | scinderin                                               | CCDS47545.1 | chr7_12666362-12666362_C_T    | 379H>Y  | Substitution | Nonsynonymous coding | 17% |
| MM12T | SCML4  | sex comb on midleg-like 4 (Drosophila)                  | CCDS5060.2  | chr6_108066164-108066164_C_T  | 224R>K  | Substitution | Nonsynonymous coding | 34% |
| MM12T | SCN11A | sodium channel, voltage-gated, type XI, alpha subunit   | CCDS33737.1 | chr3_38913709-38913709_G_A    | 1157A>V | Substitution | Nonsynonymous coding | 11% |
| MM12T | SCN1A  | sodium channel, voltage-gated, type I, alpha subunit    | CCDS33316.1 | chr2_166900484-166900484_G_A  | 580R>X  | Substitution | Nonsense             | 15% |
| MM12T | SCN4A  | sodium channel, voltage-gated, type IV, alpha subunit   | CCDS45761.1 | chr17_62043502-62043502_C_T   | 401R>H  | Substitution | Nonsynonymous coding | 16% |
| MM12T | SCN4A  | sodium channel, voltage-gated, type IV, alpha subunit   | CCDS45761.1 | chr17_62050177-62050177_G_T   | 9L>M    | Substitution | Nonsynonymous coding | 27% |
| MM12T | SCN5A  | sodium channel, voltage-gated, type V, alpha subunit    | CCDS46796.1 | chr3_38598029-38598029_T_C    | 1447Y>C | Substitution | Nonsynonymous coding | 12% |
| MM12T | SCN5A  | sodium channel, voltage-gated, type V, alpha subunit    | CCDS46796.1 | chr3_38628895-38628895_C_T    | 811R>H  | Substitution | Nonsynonymous coding | 46% |
| MM12T | SCN5A  | sodium channel, voltage-gated, type V, alpha subunit    | CCDS46796.1 | chr3_38628905-38628905_G_A    | 808R>C  | Substitution | Nonsynonymous coding | 38% |
| MM12T | SCN7A  | sodium channel, voltage-gated, type VII, alpha subunit  | CCDS46442.1 | chr2_167262742-167262742_C_T  | 1466C>Y | Substitution | Nonsynonymous coding | 18% |
| MM12T | SCN8A  | sodium channel, voltage-gated, type VIII, alpha subunit | CCDS44891.1 | chr12_52200119-52200119_C_T   | 1617R>X | Substitution | Nonsense             | 10% |
| MM12T | SCN9A  | sodium channel, voltage-gated, type IX, alpha subunit   | CCDS46441.1 | chr2_167138321-167138321_A_   | NA      | Deletion     | Splice site acceptor | 21% |
| MM12T | SCNN1B | sodium channel, non-voltage-gated 1, beta subunit       | CCDS10609.1 | chr16_23382745-23382745_G_A   | 336A>T  | Substitution | Nonsynonymous coding | 12% |
| MM12T | SCNN1G | sodium channel, non-voltage-gated 1, gamma subunit      | CCDS10608.1 | chr16_23197815-23197815_G_A   | 75V>I   | Substitution | Nonsynonymous coding | 36% |
| MM12T | SCO2   | SCO2 cytochrome c oxidase assembly protein              | CCDS14095.1 | chr22_50962113-50962113_C_T   | 243R>Q  | Substitution | Nonsynonymous coding | 13% |
| MM12T | SCRIB  | scribbled homolog (Drosophila)                          | CCDS6412.1  | chr8_144891044-144891044_G_A  | 617S>F  | Substitution | Nonsynonymous coding | 33% |
| MM12T | SCRIB  | scribbled homolog (Drosophila)                          | CCDS6412.1  | chr8_144893174-144893174_G_A  | 392A>V  | Substitution | Nonsynonymous coding | 36% |
| MM12T | SCUBE1 | signal peptide, CUB domain, EGF-like 1                  | CCDS14048.1 | chr22_43625120-43625120_A_G   | 348C>R  | Substitution | Nonsynonymous coding | 25% |
| MM12T | SCUBE2 | signal peptide, CUB domain, EGF-like 2                  | CCDS7797.1  | chr11_9047267-9047267_G_A     | 917P>S  | Substitution | Nonsynonymous coding | 12% |
| MM12T | SCYL2  | SCY1-like 2 (S. cerevisiae)                             | CCDS9076.1  | chr12_100707266-100707266_C_A | 307L>M  | Substitution | Nonsynonymous coding | 25% |
| MM12T | SCYL3  | SCY1-like 3 (S. cerevisiae)                             | CCDS1287.1  | chr1_169845129-169845129_G_A  | 152A>V  | Substitution | Nonsynonymous coding | 36% |
| MM12T | SDK2   | sidekick cell adhesion molecule 2                       | CCDS45769.1 | chr17_71348665-71348665_G_A   | 1902A>V | Substitution | Nonsynonymous coding | 31% |
| MM12T | SDK2   | sidekick cell adhesion molecule 2                       | CCDS45769.1 | chr17_71383996-71383996_G_T   | 1458A>D | Substitution | Nonsynonymous coding | 25% |
| MM12T | SDK2   | sidekick cell adhesion molecule 2                       | CCDS45769.1 | chr17_71429979-71429979_G_A   | 402P>S  | Substitution | Nonsynonymous coding | 15% |

|       |          |                                                                                        |             |                               |         |              |                      |     |
|-------|----------|----------------------------------------------------------------------------------------|-------------|-------------------------------|---------|--------------|----------------------|-----|
| MM12T | SEC13    | SEC13 homolog (S. cerevisiae)                                                          | CCDS2599.1  | chr3_10345810-10345810_G_A    | 252T>M  | Substitution | Nonsynonymous coding | 13% |
| MM12T | SEC13    | SEC13 homolog (S. cerevisiae)                                                          | CCDS2599.1  | chr3_10347322-10347322_C_T    | 169D>N  | Substitution | Nonsynonymous coding | 32% |
| MM12T | SEC22A   | SEC22 vesicle trafficking protein homolog A (S. cerevisiae)                            | CCDS3021.1  | chr3_122978437-122978437_G_A  | ISV+1>  | Substitution | Splice site donor    | 42% |
| MM12T | SEC24D   | SEC24 family, member D (S. cerevisiae)                                                 | CCDS3710.1  | chr4_119652636-119652636_C_T  | 901M>I  | Substitution | Nonsynonymous coding | 13% |
| MM12T | SEC31B   | SEC31 homolog B (S. cerevisiae)                                                        | CCDS7495.1  | chr10_102250005-102250005_G_A | 909P>S  | Substitution | Nonsynonymous coding | 25% |
| MM12T | SEC61A1  | Sec61 alpha 1 subunit (S. cerevisiae)                                                  | CCDS3046.1  | chr3_127783842-127783842_G_A  | 247A>T  | Substitution | Nonsynonymous coding | 12% |
| MM12T | SEC63    | SEC63 homolog (S. cerevisiae)                                                          | CCDS5061.1  | chr6_108279210-108279210_C_T  | 2A>T    | Substitution | Nonsynonymous coding | 20% |
| MM12T | SEH1L    | SEH1-like (S. cerevisiae)                                                              | CCDS32791.1 | chr18_12963285-12963285_G_T   | 146D>Y  | Substitution | Nonsynonymous coding | 21% |
| MM12T | SEMA3F   | sema domain, immunoglobulin domain (Ig), short basic domain, secreted, (semaphorin) 3F | CCDS2811.1  | chr3_50225291-50225291_G_A    | 701A>T  | Substitution | Nonsynonymous coding | 10% |
| MM12T | SEMA3G   | sema domain, immunoglobulin domain (Ig), short basic domain, secreted, (semaphorin) 3G | CCDS2856.1  | chr3_52476767-52476767_C_A    | 91R>L   | Substitution | Nonsynonymous coding | 29% |
| MM12T | SEMA4A   | sema domain, immunoglobulin domain (Ig), transmembrane domain (TM) and short           | CCDS1132.1  | chr1_156130294-156130294_G_A  | 210R>H  | Substitution | Nonsynonymous coding | 34% |
| MM12T | SEMA4C   | sema domain, immunoglobulin domain (Ig), transmembrane domain (TM) and short           | CCDS2029.1  | chr2_97527504-97527504_C_T    | 524S>N  | Substitution | Nonsynonymous coding | 32% |
| MM12T | SEMA4D   | sema domain, immunoglobulin domain (Ig), transmembrane domain (TM) and short           | CCDS6685.1  | chr9_92001359-92001359_C_T    | 457A>T  | Substitution | Nonsynonymous coding | 33% |
| MM12T | SEMA4G   | sema domain, immunoglobulin domain (Ig), transmembrane domain (TM) and short           | CCDS7501.1  | chr10_102738986-102738986_G_A | 314S>N  | Substitution | Nonsynonymous coding | 34% |
| MM12T | SEN2P    | SUMO1/sentrin/SMT3 specific peptidase 2                                                | CCDS33902.1 | chr3_185335310-185335310_C_T  | 385Q>X  | Substitution | Nonsense             | 26% |
| MM12T | SEN6P    | SUMO1/sentrin specific peptidase 6                                                     | CCDS47454.1 | chr6_76405530-76405530_C_T    | 696L>F  | Substitution | Nonsynonymous coding | 16% |
| MM12T | SEPSECS  | Sep (O-phosphoserine) tRNA:Sec (selenocysteine) tRNA synthase                          | CCDS3432.1  | chr4_25125692-25125692_C_A    | 377R>M  | Substitution | Nonsynonymous coding | 31% |
| MM12T | SERINC2  | serine incorporator 2                                                                  | CCDS30662.1 | chr1_31905867-31905867_G_A    | 356C>Y  | Substitution | Nonsynonymous coding | 26% |
| MM12T | SERPINA1 | serpin peptidase inhibitor, clade A (alpha-1 antitrypsin), member 1                    | CCDS9925.1  | chr14_94845910-94845910_C_T   | 319G>E  | Substitution | Nonsynonymous coding | 11% |
| MM12T | SERPINB6 | serpin peptidase inhibitor, clade B (ovalbumin), member 6                              | CCDS4479.1  | chr6_2954883-2954883_T_C      | 125S>G  | Substitution | Nonsynonymous coding | 38% |
| MM12T | SERPINF2 | serpin peptidase inhibitor, clade F (alpha-2 antiplasmin, pigment epithelium derived   | CCDS11011.1 | chr17_1651916-1651916_C_T     | 247P>L  | Substitution | Nonsynonymous coding | 35% |
| MM12T | SERPING1 | serpin peptidase inhibitor, clade G (C1 inhibitor), member 1                           | CCDS7962.1  | chr11_57367823-57367823_G_A   | 175A>T  | Substitution | Nonsynonymous coding | 20% |
| MM12T | SETBP1   | SET binding protein 1                                                                  | CCDS11923.2 | chr18_42281598-42281598_C_T   | 96A>V   | Substitution | Nonsynonymous coding | 34% |
| MM12T | SETD2    | SET domain containing 2                                                                | CCDS2749.2  | chr3_47129719-47129719_C_A    | 1721A>S | Substitution | Nonsynonymous coding | 12% |
| MM12T | SETD7    | SET domain containing (lysine methyltransferase) 7                                     | CCDS3748.1  | chr4_140432878-140432878_G_T  | 347P>H  | Substitution | Nonsynonymous coding | 21% |
| MM12T | SETX     | senataxin                                                                              | CCDS6947.1  | chr9_135139846-135139846_C_T  | 2605R>Q | Substitution | Nonsynonymous coding | 31% |
| MM12T | SETX     | senataxin                                                                              | CCDS6947.1  | chr9_135202634-135202634_C_T  | 1451V>I | Substitution | Nonsynonymous coding | 37% |
| MM12T | SEZ6     | seizure related 6 homolog (mouse)                                                      | CCDS45639.1 | chr17_27308823-27308823_T_C   | 97D>G   | Substitution | Nonsynonymous coding | 44% |
| MM12T | SEZ6L    | seizure related 6 homolog (mouse)-like                                                 | CCDS13833.1 | chr22_26688446-26688446_C_T   | 57P>S   | Substitution | Nonsynonymous coding | 13% |
| MM12T | SEZ6L    | seizure related 6 homolog (mouse)-like                                                 | CCDS13833.1 | chr22_26688962-26688962_G_A   | 229A>T  | Substitution | Nonsynonymous coding | 12% |
| MM12T | SEZ6L2   | seizure related 6 homolog (mouse)-like 2                                               | CCDS10659.1 | chr16_29906718-29906718_C_A   | 239G>C  | Substitution | Nonsynonymous coding | 11% |
| MM12T | SF3A1    | splicing factor 3a, subunit 1, 120kDa                                                  | CCDS13875.1 | chr22_30737692-30737692_C_A   | 354D>Y  | Substitution | Nonsynonymous coding | 29% |



|       |          |                                                                                |                 |                               |        |              |                      |     |
|-------|----------|--------------------------------------------------------------------------------|-----------------|-------------------------------|--------|--------------|----------------------|-----|
| MM12T | SF3B3    | splicing factor 3b, subunit 3, 130kDa                                          | CCDS10894.1     | chr16_70563046-70563046_G_A   | 114R>H | Substitution | Nonsynonymous coding | 12% |
| MM12T | SF3B3    | splicing factor 3b, subunit 3, 130kDa                                          | CCDS10894.1     | chr16_70566412-70566412_G_A   | 201A>T | Substitution | Nonsynonymous coding | 35% |
| MM12T | SF3B4    | splicing factor 3b, subunit 4, 49kDa                                           | CCDS941.1       | chr1_149898573-149898573_C_T  | 134R>Q | Substitution | Nonsynonymous coding | 55% |
| MM12T | SFMBT2   | Scm-like with four mbt domains 2                                               | CCDS31138.1     | chr10_7327896-7327896_C_A     | 153D>Y | Substitution | Nonsynonymous coding | 11% |
| MM12T | SFPQ     | splicing factor proline/glutamine-rich                                         | CCDS388.1       | chr1_35652837-35652837_G_A    | 611R>X | Substitution | Nonsense             | 29% |
| MM12T | SFSPA1   | surfactant protein A1                                                          | CCDS44445.1     | chr10_81373804-81373804_T_A   | 228Y>N | Substitution | Nonsynonymous coding | 11% |
| MM12T | SFXN3    | sideroflexin 3                                                                 | CCDS7508.2      | chr10_102795840-102795840_A_G | 142D>G | Substitution | Nonsynonymous coding | 13% |
| MM12T | SFXN5    | sideroflexin 5                                                                 | CCDS1922.1      | chr2_73227601-73227601_G_T    | 143H>N | Substitution | Nonsynonymous coding | 11% |
| MM12T | SGCA     | sarcoglycan, alpha (50kDa dystrophin-associated glycoprotein)                  | CCDS32679.1     | chr17_48246476-48246476_C_T   | 203A>V | Substitution | Nonsynonymous coding | 12% |
| MM12T | SGK110   | putative uncharacterized serine/threonine-protein kinase SgK110 [Source:RefSeq | ENST00000429736 | chr19_56052351-56052351_C_A   | 314R>I | Substitution | Nonsynonymous coding | 31% |
| MM12T | SGOL1    | shugoshin-like 1 (S. pombe)                                                    | CCDS33716.1     | chr3_20216050-20216050_T_     | NA     | Deletion     | Frameshift           | 23% |
| MM12T | SGOL2    | shugoshin-like 2 (S. pombe)                                                    | CCDS42796.1     | chr2_201436926-201436926_G_T  | 619K>N | Substitution | Nonsynonymous coding | 24% |
| MM12T | SGPL1    | sphingosine-1-phosphate lyase 1                                                | CCDS31216.1     | chr10_72629616-72629616_C_T   | 258R>W | Substitution | Nonsynonymous coding | 14% |
| MM12T | SGPP1    | sphingosine-1-phosphate phosphatase 1                                          | CCDS9760.1      | chr14_64153188-64153188_C_T   | 321E>K | Substitution | Nonsynonymous coding | 27% |
| MM12T | SGSM2    | small G protein signaling modulator 2                                          | CCDS32526.1     | chr17_2265006-2265006_C_T     | 70A>V  | Substitution | Nonsynonymous coding | 22% |
| MM12T | SGSM2    | small G protein signaling modulator 2                                          | ENST00000424187 | chr17_2266206-2266206_C_A     | 155P>H | Substitution | Nonsynonymous coding | 37% |
| MM12T | SGSM2    | small G protein signaling modulator 2                                          | CCDS32526.1     | chr17_2276766-2276766_G_A     | 687V>M | Substitution | Nonsynonymous coding | 14% |
| MM12T | SGSM3    | small G protein signaling modulator 3                                          | CCDS14002.1     | chr22_40802604-40802604_G_A   | 375A>T | Substitution | Nonsynonymous coding | 14% |
| MM12T | SGSM3    | small G protein signaling modulator 3                                          | ENST00000322069 | chr22_40802702-40802702_G_T   | 350Q>H | Substitution | Nonsynonymous coding | 31% |
| MM12T | SH2B3    | SH2B adaptor protein 3                                                         | CCDS9153.1      | chr12_111856125-111856125_G_A | 59R>H  | Substitution | Nonsynonymous coding | 11% |
| MM12T | SH2D1A   | SH2 domain containing 1A                                                       | CCDS14608.1     | chrX_123499657-123499657_G_A  | 62G>S  | Substitution | Nonsynonymous coding | 30% |
| MM12T | SH2D3A   | SH2 domain containing 3A                                                       | CCDS12173.1     | chr19_6754150-6754150_G_A     | 433R>C | Substitution | Nonsynonymous coding | 13% |
| MM12T | SH2D3A   | SH2 domain containing 3A                                                       | CCDS12173.1     | chr19_6760769-6760769_C_T     | 100R>H | Substitution | Nonsynonymous coding | 26% |
| MM12T | SH2D3C   | SH2 domain containing 3C                                                       | CCDS6877.1      | chr9_130536578-130536578_C_T  | 69R>H  | Substitution | Nonsynonymous coding | 23% |
| MM12T | SH2D7    | SH2 domain containing 7                                                        | CCDS45315.1     | chr15_78390312-78390312_G_A   | 103R>Q | Substitution | Nonsynonymous coding | 14% |
| MM12T | SH2D7    | SH2 domain containing 7                                                        | CCDS45315.1     | chr15_78390423-78390423_C_A   | 140A>D | Substitution | Nonsynonymous coding | 12% |
| MM12T | SH3BP5L  | SH3-binding domain protein 5-like                                              | CCDS31126.1     | chr1_249110750-249110750_G_A  | 120R>W | Substitution | Nonsynonymous coding | 20% |
| MM12T | SH3GLB2  | SH3-domain GRB2-like endophilin B2                                             | CCDS6916.1      | chr9_131774523-131774523_C_T  | 206A>T | Substitution | Nonsynonymous coding | 37% |
| MM12T | SH3GLB2  | SH3-domain GRB2-like endophilin B2                                             | CCDS6916.1      | chr9_131783499-131783499_C_T  | ISV-1> | Substitution | Splice site acceptor | 39% |
| MM12T | SH3PXD2A | SH3 and PX domains 2A                                                          | CCDS31278.1     | chr10_105363249-105363249_C_T | 548V>M | Substitution | Nonsynonymous coding | 35% |
| MM12T | SH3RF1   | SH3 domain containing ring finger 1                                            | CCDS34099.1     | chr4_170042069-170042069_A_   | NA     | Deletion     | Frameshift           | 13% |
| MM12T | SH3RF2   | SH3 domain containing ring finger 2                                            | CCDS4280.1      | chr5_145428646-145428646_C_T  | 387A>V | Substitution | Nonsynonymous coding | 43% |

|       |          |                                                                        |                 |                               |         |              |                      |     |
|-------|----------|------------------------------------------------------------------------|-----------------|-------------------------------|---------|--------------|----------------------|-----|
| MM12T | SH3TC1   | SH3 domain and tetratricopeptide repeats 1                             | CCDS3399.1      | chr4_8221193-8221193_G_A      | 350A>T  | Substitution | Nonsynonymous coding | 17% |
| MM12T | SH3TC1   | SH3 domain and tetratricopeptide repeats 1                             | CCDS3399.1      | chr4_8235213-8235213_G_T      | 1085Q>H | Substitution | Nonsynonymous coding | 38% |
| MM12T | SHANK1   | SH3 and multiple ankyrin repeat domains 1                              | CCDS12799.1     | chr19_51170740-51170740_G_A   | 1493R>W | Substitution | Nonsynonymous coding | 13% |
| MM12T | SHANK1   | SH3 and multiple ankyrin repeat domains 1                              | CCDS12799.1     | chr19_51206817-51206817_C_T   | 498R>H  | Substitution | Nonsynonymous coding | 17% |
| MM12T | SHANK1   | SH3 and multiple ankyrin repeat domains 1                              | CCDS12799.1     | chr19_51206944-51206944_C_T   | 456A>T  | Substitution | Nonsynonymous coding | 15% |
| MM12T | SHANK2   | SH3 and multiple ankyrin repeat domains 2                              | NM_133266       | chr11_70333378-70333378_G_A   | 419A>V  | Substitution | Nonsynonymous coding | 18% |
| MM12T | SHANK3   | SH3 and multiple ankyrin repeat domains 3                              | CCDS46737.1     | chr22_51143268-51143268_G_A   | 641R>H  | Substitution | Nonsynonymous coding | 11% |
| MM12T | SHANK3   | SH3 and multiple ankyrin repeat domains 3                              | CCDS46737.1     | chr22_51159283-51159283_G_A   | 1024A>T | Substitution | Nonsynonymous coding | 28% |
| MM12T | SHANK3   | SH3 and multiple ankyrin repeat domains 3                              | CCDS46737.1     | chr22_51169712-51169712_G_A   | 1739R>H | Substitution | Nonsynonymous coding | 13% |
| MM12T | SHC2     | SHC (Src homology 2 domain containing) transforming protein 2          | CCDS45891.1     | chr19_436412-436412_G_A       | 265A>V  | Substitution | Nonsynonymous coding | 36% |
| MM12T | SHC3     | SHC (Src homology 2 domain containing) transforming protein 3          | CCDS6681.1      | chr9_91692786-91692786_G_T    | 193P>H  | Substitution | Nonsynonymous coding | 26% |
| MM12T | SHCBP1L  | SHC SH2-domain binding protein 1-like                                  | CCDS30955.1     | chr1_182921884-182921884_C_T  | 129E>K  | Substitution | Nonsynonymous coding | 32% |
| MM12T | SHCBP1L  | SHC SH2-domain binding protein 1-like                                  | ENST00000287709 | chr1_182922342-182922342_C_A  | 46A>S   | Substitution | Nonsynonymous coding | 34% |
| MM12T | SHH      | sonic hedgehog                                                         | CCDS5942.1      | chr7_155595610-155595610_G_A  | 458A>V  | Substitution | Nonsynonymous coding | 28% |
| MM12T | SHISA3   | shisa homolog 3 ( <i>Xenopus laevis</i> )                              | CCDS33979.1     | chr4_42403338-42403338_A_G    | 196Y>C  | Substitution | Nonsynonymous coding | 46% |
| MM12T | SHMT1    | serine hydroxymethyltransferase 1 (soluble)                            | ENST00000329968 | chr17_18251613-18251613_C_T   | 108G>D  | Substitution | Nonsynonymous coding | 21% |
| MM12T | SHMT2    | serine hydroxymethyltransferase 2 (mitochondrial)                      | CCDS8934.1      | chr12_57624757-57624757_C_T   | 69R>C   | Substitution | Nonsynonymous coding | 12% |
| MM12T | SHMT2    | serine hydroxymethyltransferase 2 (mitochondrial)                      | CCDS8934.1      | chr12_57627406-57627406_G_A   | 362A>T  | Substitution | Nonsynonymous coding | 27% |
| MM12T | SHROOM2  | shroom family member 2                                                 | CCDS14135.1     | chrX_9900244-9900244_G_A      | 974S>N  | Substitution | Nonsynonymous coding | 30% |
| MM12T | SHROOM3  | shroom family member 3                                                 | CCDS3579.2      | chr4_77659960-77659960_C_T    | 212R>W  | Substitution | Nonsynonymous coding | 15% |
| MM12T | SHROOM3  | shroom family member 3                                                 | CCDS3579.2      | chr4_77700055-77700055_C_A    | 1906L>M | Substitution | Nonsynonymous coding | 37% |
| MM12T | SHROOM4  | shroom family member 4                                                 | CCDS35277.1     | chrX_50557008-50557008_C_T    | 4R>Q    | Substitution | Nonsynonymous coding | 28% |
| MM12T | SIDT1    | SID1 transmembrane family, member 1                                    | CCDS2974.1      | chr3_113331029-113331029_C_T  | 652R>C  | Substitution | Nonsynonymous coding | 20% |
| MM12T | SIGLEC1  | sialic acid binding Ig-like lectin 1, sialoadhesin                     | CCDS13060.1     | chr20_3687730-3687730_C_A     | 16A>S   | Substitution | Nonsynonymous coding | 30% |
| MM12T | SIGLEC16 | sialic acid binding Ig-like lectin 16 (gene/pseudogene)                | ENST00000417280 | chr19_50476305-50476305_G_T   | 488R>M  | Substitution | Nonsynonymous coding | 32% |
| MM12T | SIGLEC5  | sialic acid binding Ig-like lectin 5                                   | CCDS33088.1     | chr19_52132326-52132326_G_A   | 235A>V  | Substitution | Nonsynonymous coding | 24% |
| MM12T | SIGLEC9  | sialic acid binding Ig-like lectin 9                                   | CCDS12825.1     | chr19_51629047-51629047_G_T   | 205Q>H  | Substitution | Nonsynonymous coding | 32% |
| MM12T | SIK2     | salt-inducible kinase 2                                                | CCDS8347.1      | chr11_111571609-111571609_G_T | ISV-1>  | Substitution | Splice site acceptor | 40% |
| MM12T | SIK3     | SIK family kinase 3                                                    | CCDS8379.1      | chr11_116746131-116746131_G_A | 368P>S  | Substitution | Nonsynonymous coding | 14% |
| MM12T | SIL1     | SIL1 homolog, endoplasmic reticulum chaperone ( <i>S. cerevisiae</i> ) | CCDS4209.1      | chr5_138356971-138356971_G_A  | 219A>V  | Substitution | Nonsynonymous coding | 13% |
| MM12T | SIN3A    | SIN3 transcription regulator homolog A (yeast)                         | CCDS10279.1     | chr15_75668133-75668133_G_A   | 1155T>I | Substitution | Nonsynonymous coding | 32% |
| MM12T | SIN3B    | SIN3 transcription regulator homolog B (yeast)                         | CCDS32946.1     | chr19_16980568-16980568_G_A   | 734A>T  | Substitution | Nonsynonymous coding | 31% |

|       |         |                                                                                               |                |                              |         |              |                      |     |
|-------|---------|-----------------------------------------------------------------------------------------------|----------------|------------------------------|---------|--------------|----------------------|-----|
| MM12T | SIN3B   | SIN3 transcription regulator homolog B (yeast)                                                | CCDS32946.1    | chr19_16987313-16987313_G_A  | 960R>H  | Substitution | Nonsynonymous coding | 12% |
| MM12T | SIPA1   | signal-induced proliferation-associated 1                                                     | CCDS8108.1     | chr11_65415014-65415014_G_A  | 731V>M  | Substitution | Nonsynonymous coding | 11% |
| MM12T | SIPA1L1 | signal-induced proliferation-associated 1 like 1                                              | CCDS9807.1     | chr14_72191430-72191430_C_T  | 1519R>C | Substitution | Nonsynonymous coding | 15% |
| MM12T | SIPA1L3 | signal-induced proliferation-associated 1 like 3                                              | CCDS33007.1    | chr19_38591735-38591735_G_A  | 633G>D  | Substitution | Nonsynonymous coding | 13% |
| MM12T | SIRPB2  | signal-regulatory protein beta 2                                                              | CCDS42849.1    | chr20_1460678-1460678_G_A    | 40Q>X   | Substitution | Nonsense             | 35% |
| MM12T | SIRT6   | sirtuin 6                                                                                     | CCDS12122.1    | chr19_4175908-4175908_C_T    | 155G>D  | Substitution | Nonsynonymous coding | 22% |
| MM12T | SKA1    | spindle and kinetochore associated complex subunit 1                                          | CCDS11946.1    | chr18_47917558-47917558_G_A  | 172V>I  | Substitution | Nonsynonymous coding | 46% |
| MM12T | SKIL    | SKI-like oncogene                                                                             | CCDS33890.1    | chr3_170108188-170108188_G_T | 536R>I  | Substitution | Nonsynonymous coding | 36% |
| MM12T | SKIV2L  | superkiller viralicidic activity 2-like (S. cerevisiae)                                       | CCDS4731.1     | chr6_31934558-31934558_G_A   | 759A>T  | Substitution | Nonsynonymous coding | 18% |
| MM12T | SKIV2L  | superkiller viralicidic activity 2-like (S. cerevisiae)                                       | CCDS4731.1     | chr6_31936247-31936247_C_T   | 1001R>W | Substitution | Nonsynonymous coding | 45% |
| MM12T | SLAIN2  | SLAIN motif family, member 2                                                                  | CCDS47051.1    | chr4_48422403-48422403_C_T   | 541A>V  | Substitution | Nonsynonymous coding | 35% |
| MM12T | SLC11A2 | solute carrier family 11 (proton-coupled divalent metal ion transporters), member 2           | CCDS8805.1     | chr12_51389441-51389441_C_A  | 321A>S  | Substitution | Nonsynonymous coding | 21% |
| MM12T | SLC12A5 | solute carrier family 12 (potassium/chloride transporter), member 5                           | CCDS46610.1    | chr20_44650444-44650444_G_T  | 14G>W   | Substitution | Nonsynonymous coding | 18% |
| MM12T | SLC12A5 | solute carrier family 12 (potassium/chloride transporter), member 5                           | CCDS13391.1    | chr20_44658005-44658005_T_C  | 8C>R    | Substitution | Nonsynonymous coding | 30% |
| MM12T | SLC12A5 | solute carrier family 12 (potassium/chloride transporter), member 5                           | CCDS46610.1    | chr20_44684911-44684911_G_T  | 993E>D  | Substitution | Nonsynonymous coding | 33% |
| MM12T | SLC12A9 | solute carrier family 12 (potassium/chloride transporters), member 9                          | CCDS5707.1     | chr7_100456537-100456537_G_T | 280G>C  | Substitution | Nonsynonymous coding | 29% |
| MM12T | SLC13A3 | solute carrier family 13 (sodium-dependent dicarboxylate transporter), member 3               | CCDS13400.1    | chr20_45188833-45188833_C_T  | 546R>Q  | Substitution | Nonsynonymous coding | 18% |
| MM12T | SLC13A4 | solute carrier family 13 (sodium/sulfate symporters), member 4                                | CCDS5840.1     | chr7_135376373-135376373_G_A | 414A>V  | Substitution | Nonsynonymous coding | 10% |
| MM12T | SLC15A2 | solute carrier family 15 (H+/peptide transporter), member 2                                   | CCDS3007.1     | chr3_121658260-121658260_C_T | 609A>V  | Substitution | Nonsynonymous coding | 24% |
| MM12T | SLC15A3 | solute carrier family 15, member 3                                                            | CCDS7998.1     | chr11_60718864-60718864_C_T  | 54A>T   | Substitution | Nonsynonymous coding | 12% |
| MM12T | SLC15A3 | solute carrier family 15, member 3                                                            | CCDS7998.1     | chr11_60718882-60718882_C_T  | 48A>T   | Substitution | Nonsynonymous coding | 20% |
| MM12T | SLC16A2 | solute carrier family 16, member 2 (thyroid hormone transporter)                              | CCDS14426.1    | chrX_73744222-73744222_G_A   | 276G>R  | Substitution | Nonsynonymous coding | 42% |
| MM12T | SLC16A2 | solute carrier family 16, member 2 (thyroid hormone transporter)                              | CCDS14426.1    | chrX_73745669-73745669_C_T   | 445R>C  | Substitution | Nonsynonymous coding | 23% |
| MM12T | SLC16A8 | solute carrier family 16, member 8 (monocarboxylic acid transporter 3)                        | CCDS13966.1    | chr22_38477590-38477590_C_T  | 152G>D  | Substitution | Nonsynonymous coding | 12% |
| MM12T | SLC16A9 | solute carrier family 16, member 9 (monocarboxylic acid transporter 9)                        | CCDS7256.1     | chr10_61413948-61413948_C_T  | 279C>Y  | Substitution | Nonsynonymous coding | 12% |
| MM12T | SLC17A1 | solute carrier family 17 (sodium phosphate), member 1                                         | CCDS4565.1     | chr6_25826742-25826742_C_A   | 52D>Y   | Substitution | Nonsynonymous coding | 16% |
| MM12T | SLC17A3 | solute carrier family 17 (sodium phosphate), member 3                                         | CCDS47385.1    | chr6_25850360-25850360_C_A   | 347G>C  | Substitution | Nonsynonymous coding | 42% |
| MM12T | SLC17A4 | solute carrier family 17 (sodium phosphate), member 4                                         | CCDS4564.1     | chr6_25762201-25762201_G_A   | 4G>E    | Substitution | Nonsynonymous coding | 21% |
| MM12T | SLC18A3 | solute carrier family 18 (vesicular acetylcholine), member 3                                  | CCDS7231.1     | chr10_50819436-50819436_C_T  | 217A>V  | Substitution | Nonsynonymous coding | 10% |
| MM12T | SLC19A1 | solute carrier family 19 (folate transporter), member 1                                       | ENST0000380014 | chr21_46918460-46918460_C_T  | 201A>T  | Substitution | Nonsynonymous coding | 12% |
| MM12T | SLC1A1  | solute carrier family 1 (neuronal/epithelial high affinity glutamate transporter, system Xag) | CCDS6452.1     | chr9_4561494-4561494_G_A     | 93R>H   | Substitution | Nonsynonymous coding | 17% |
| MM12T | SLC1A2  | solute carrier family 1 (glial high affinity glutamate transporter), member 2                 | CCDS31459.1    | chr11_35339032-35339032_G_A  | 17R>X   | Substitution | Nonsense             | 22% |

|       |          |                                                                                              |             |                               |        |              |                      |     |
|-------|----------|----------------------------------------------------------------------------------------------|-------------|-------------------------------|--------|--------------|----------------------|-----|
| MM12T | SLC1A3   | solute carrier family 1 (glial high affinity glutamate transporter), member 3                | CCDS3919.1  | chr5_36608694-36608694_G_A    | 57A>T  | Substitution | Nonsynonymous coding | 13% |
| MM12T | SLC1A4   | solute carrier family 1 (glutamate/neutral amino acid transporter), member 4                 | CCDS1879.1  | chr2_65248251-65248251_G_A    | 524E>K | Substitution | Nonsynonymous coding | 12% |
| MM12T | SLC22A12 | solute carrier family 22 (organic anion/urate transporter), member 12                        | CCDS8075.1  | chr11_64359249-64359249_C_T   | 74A>V  | Substitution | Nonsynonymous coding | 18% |
| MM12T | SLC22A13 | solute carrier family 22 (organic anion transporter), member 13                              | CCDS2676.1  | chr3_38316982-38316982_G_A    | ISV+1> | Substitution | Splice site donor    | 27% |
| MM12T | SLC22A14 | solute carrier family 22, member 14                                                          | CCDS2677.1  | chr3_38350480-38350480_G_A    | 271A>T | Substitution | Nonsynonymous coding | 14% |
| MM12T | SLC22A2  | solute carrier family 22 (organic cation transporter), member 2                              | CCDS5276.1  | chr6_160679669-160679669_C_T  | 41V>I  | Substitution | Nonsynonymous coding | 43% |
| MM12T | SLC22A23 | solute carrier family 22, member 23                                                          | CCDS47363.1 | chr6_3287102-3287102_G_T      | 513L>I | Substitution | Nonsynonymous coding | 33% |
| MM12T | SLC22A3  | solute carrier family 22 (extraneuronal monoamine transporter), member 3                     | CCDS5277.1  | chr6_160858054-160858054_G_T  | 367G>X | Substitution | Nonsense             | 19% |
| MM12T | SLC23A2  | solute carrier family 23 (nucleobase transporters), member 2                                 | CCDS13085.1 | chr20_4850569-4850569_G       | NA     | Insertion    | Frameshift           | 23% |
| MM12T | SLC23A3  | solute carrier family 23 (nucleobase transporters), member 3                                 | CCDS46517.1 | chr2_220034352-220034352_G_T  | 71L>I  | Substitution | Nonsynonymous coding | 44% |
| MM12T | SLC24A5  | solute carrier family 24, member 5                                                           | CCDS10128.1 | chr15_48429140-48429140_G_A   | 284G>D | Substitution | Nonsynonymous coding | 19% |
| MM12T | SLC24A6  | solute carrier family 24 (sodium/lithium/calcium exchanger), member                          | CCDS31909.1 | chr12_113758883-113758883_G_T | 114L>M | Substitution | Nonsynonymous coding | 34% |
| MM12T | SLC24A6  | solute carrier family 24 (sodium/lithium/calcium exchanger), member                          | CCDS31909.1 | chr12_113759104-113759104_C_T | 69R>Q  | Substitution | Nonsynonymous coding | 30% |
| MM12T | SLC25A10 | solute carrier family 25 (mitochondrial carrier; dicarboxylate transporter), member 10       | CCDS11786.1 | chr17_79683073-79683073_C_T   | 138R>W | Substitution | Nonsynonymous coding | 13% |
| MM12T | SLC25A10 | solute carrier family 25 (mitochondrial carrier; dicarboxylate transporter), member 10       | CCDS11786.1 | chr17_79684448-79684448_C_T   | 185A>V | Substitution | Nonsynonymous coding | 12% |
| MM12T | SLC25A11 | solute carrier family 25 (mitochondrial carrier; oxoglutarate carrier), member 11            | CCDS11059.1 | chr17_4842151-4842151_G_T     | 123A>D | Substitution | Nonsynonymous coding | 22% |
| MM12T | SLC25A15 | solute carrier family 25 (mitochondrial carrier; ornithine transporter) member 15            | CCDS9373.1  | chr13_41373421-41373421_T_C   | 95V>A  | Substitution | Nonsynonymous coding | 22% |
| MM12T | SLC25A2  | solute carrier family 25 (mitochondrial carrier; ornithine transporter) member 2             | CCDS4258.1  | chr5_140683408-140683408_C_T  | 9A>T   | Substitution | Nonsynonymous coding | 11% |
| MM12T | SLC25A22 | solute carrier family 25 (mitochondrial carrier; glutamate), member 22                       | CCDS7715.1  | chr11_791983-791983_C_T       | 302A>T | Substitution | Nonsynonymous coding | 31% |
| MM12T | SLC25A31 | solute carrier family 25 (mitochondrial carrier; adenine nucleotide translocator), member 31 | CCDS3733.1  | chr4_128694557-128694557_G_A  | 259R>Q | Substitution | Nonsynonymous coding | 14% |
| MM12T | SLC25A33 | solute carrier family 25 (pyrimidine nucleotide carrier), member 33                          | CCDS103.1   | chr1_9630381-9630381_G_T      | 127S>I | Substitution | Nonsynonymous coding | 35% |
| MM12T | SLC25A37 | solute carrier family 25 (mitochondrial iron transporter), member 37                         | CCDS47828.1 | chr8_23428918-23428918_G_A    | 189W>X | Substitution | Nonsense             | 29% |
| MM12T | SLC25A42 | solute carrier family 25, member 42                                                          | CCDS32966.1 | chr19_19212600-19212600_G_T   | 31R>M  | Substitution | Nonsynonymous coding | 29% |
| MM12T | SLC26A1  | solute carrier family 26 (sulfate transporter), member 1                                     | CCDS33934.1 | chr4_985409-985409_C_T        | 28R>H  | Substitution | Nonsynonymous coding | 29% |
| MM12T | SLC26A5  | solute carrier family 26, member 5 (prestin)                                                 | CCDS5733.1  | chr7_103029497-103029497_G_A  | 491A>V | Substitution | Nonsynonymous coding | 18% |
| MM12T | SLC26A8  | solute carrier family 26, member 8                                                           | CCDS4813.1  | chr6_35927290-35927290_C_T    | 604G>R | Substitution | Nonsynonymous coding | 11% |
| MM12T | SLC26A8  | solute carrier family 26, member 8                                                           | CCDS4813.1  | chr6_35943175-35943175_C_T    | 422D>N | Substitution | Nonsynonymous coding | 12% |
| MM12T | SLC26A9  | solute carrier family 26, member 9                                                           | CCDS30989.1 | chr1_205893572-205893572_G_A  | 479P>S | Substitution | Nonsynonymous coding | 31% |
| MM12T | SLC27A5  | solute carrier family 27 (fatty acid transporter), member 5                                  | CCDS12983.1 | chr19_59010523-59010523_G_A   | 578Q>X | Substitution | Nonsense             | 23% |
| MM12T | SLC29A3  | solute carrier family 29 (nucleoside transporters), member 3                                 | CCDS7310.1  | chr10_73111521-73111521_A_G   | 196R>G | Substitution | Nonsynonymous coding | 15% |
| MM12T | SLC2A11  | solute carrier family 2 (facilitated glucose transporter), member 11                         | CCDS13818.1 | chr22_24224651-24224651_C_T   | 238R>W | Substitution | Nonsynonymous coding | 24% |
| MM12T | SLC2A11  | solute carrier family 2 (facilitated glucose transporter), member 11                         | CCDS13818.1 | chr22_24224711-24224711_G_A   | 258A>T | Substitution | Nonsynonymous coding | 13% |

|       |          |                                                                                  |                 |                              |        |              |                      |     |
|-------|----------|----------------------------------------------------------------------------------|-----------------|------------------------------|--------|--------------|----------------------|-----|
| MM12T | SLC2A11  | solute carrier family 2 (facilitated glucose transporter), member 11             | CCDS13818.1     | chr22_24226169-24226169_G_A  | 381A>T | Substitution | Nonsynonymous coding | 11% |
| MM12T | SLC2A11  | solute carrier family 2 (facilitated glucose transporter), member 11             | CCDS13818.1     | chr22_24226491-24226491_G_A  | 396G>R | Substitution | Nonsynonymous coding | 25% |
| MM12T | SLC30A6  | solute carrier family 30 (zinc transporter), member 6                            | CCDS1780.1      | chr2_32434629-32434629_T_C   | 295L>S | Substitution | Nonsynonymous coding | 27% |
| MM12T | SLC32A1  | solute carrier family 32 (GABA vesicular transporter), member 1                  | CCDS13307.1     | chr20_37356749-37356749_G_A  | 349V>M | Substitution | Nonsynonymous coding | 36% |
| MM12T | SLC34A1  | solute carrier family 34 (sodium phosphate), member 1                            | CCDS4418.1      | chr5_176814874-176814874_G_A | 215R>Q | Substitution | Nonsynonymous coding | 35% |
| MM12T | SLC35A4  | solute carrier family 35, member A4                                              | ENST00000432254 | chr5_139946719-139946719_C_A | 34P>H  | Substitution | Nonsynonymous coding | 12% |
| MM12T | SLC35B1  | solute carrier family 35, member B1                                              | CCDS11552.1     | chr17_47783615-47783615_G_T  | 97A>D  | Substitution | Nonsynonymous coding | 29% |
| MM12T | SLC35C1  | solute carrier family 35, member C1                                              | CCDS7914.1      | chr11_45832872-45832872_G_A  | 361A>T | Substitution | Nonsynonymous coding | 23% |
| MM12T | SLC35D3  | solute carrier family 35, member D3                                              | CCDS34544.1     | chr6_137245534-137245534_G_T | 317Q>H | Substitution | Nonsynonymous coding | 43% |
| MM12T | SLC35E2  | solute carrier family 35, member E2                                              | CCDS33.1        | chr1_1663923-1663923_G_T     | 258L>M | Substitution | Nonsynonymous coding | 29% |
| MM12T | SLC35F3  | solute carrier family 35, member F3                                              | CCDS1600.1      | chr1_234444852-234444852_G_A | 205C>Y | Substitution | Nonsynonymous coding | 29% |
| MM12T | SLC35F3  | solute carrier family 35, member F3                                              | CCDS1600.1      | chr1_234454650-234454650_C_A | 370P>T | Substitution | Nonsynonymous coding | 27% |
| MM12T | SLC36A4  | solute carrier family 36 (proton/amino acid symporter), member 4                 | CCDS8291.1      | chr11_92882002-92882002_C_T  | 406A>T | Substitution | Nonsynonymous coding | 20% |
| MM12T | SLC38A10 | solute carrier family 38, member 10                                              | CCDS11780.1     | chr17_79225281-79225281_C_T  | 693A>T | Substitution | Nonsynonymous coding | 33% |
| MM12T | SLC38A10 | solute carrier family 38, member 10                                              | CCDS42397.1     | chr17_79257295-79257295_C_T  | 91G>R  | Substitution | Nonsynonymous coding | 30% |
| MM12T | SLC38A7  | solute carrier family 38, member 7                                               | CCDS10800.1     | chr16_58705015-58705015_G_A  | 389P>S | Substitution | Nonsynonymous coding | 15% |
| MM12T | SLC39A14 | solute carrier family 39 (zinc transporter), member 14                           | CCDS47823.1     | chr8_22273701-22273701_G_A   | 352G>D | Substitution | Nonsynonymous coding | 11% |
| MM12T | SLC39A3  | solute carrier family 39 (zinc transporter), member 3                            | CCDS12093.1     | chr19_2732930-2732930_C_T    | 255G>D | Substitution | Nonsynonymous coding | 28% |
| MM12T | SLC39A4  | solute carrier family 39 (zinc transporter), member 4                            | CCDS6424.1      | chr8_145638307-145638307_C_T | 551A>T | Substitution | Nonsynonymous coding | 35% |
| MM12T | SLC39A4  | solute carrier family 39 (zinc transporter), member 4                            | CCDS6424.1      | chr8_145639424-145639424_C_T | 402R>H | Substitution | Nonsynonymous coding | 32% |
| MM12T | SLC44A3  | solute carrier family 44, member 3                                               | CCDS44176.1     | chr1_95356734-95356734_G_A   | 511A>T | Substitution | Nonsynonymous coding | 32% |
| MM12T | SLC44A4  | solute carrier family 44, member 4                                               | CCDS4724.2      | chr6_31837015-31837015_G_A   | 384Q>X | Substitution | Nonsense             | 19% |
| MM12T | SLC44A5  | solute carrier family 44, member 5                                               | CCDS667.1       | chr1_75702681-75702681_C_T   | 244W>X | Substitution | Nonsense             | 37% |
| MM12T | SLC45A1  | solute carrier family 45, member 1                                               | CCDS30577.1     | chr1_8384693-8384693_G_A     | 102A>T | Substitution | Nonsynonymous coding | 13% |
| MM12T | SLC45A4  | solute carrier family 45, member 4                                               | CCDS34948.1     | chr8_142228211-142228211_G_A | 459R>W | Substitution | Nonsynonymous coding | 12% |
| MM12T | SLC47A1  | solute carrier family 47, member 1                                               | CCDS11209.1     | chr17_19451350-19451350_C_T  | 120A>V | Substitution | Nonsynonymous coding | 12% |
| MM12T | SLC47A1  | solute carrier family 47, member 1                                               | CCDS11209.1     | chr17_19480757-19480757_C_T  | 535A>V | Substitution | Nonsynonymous coding | 36% |
| MM12T | SLC4A1   | solute carrier family 4, anion exchanger, member 1 (erythrocyte membrane protein | CCDS11481.1     | chr17_42328912-42328912_C_T  | 786A>T | Substitution | Nonsynonymous coding | 15% |
| MM12T | SLC4A11  | solute carrier family 4, sodium borate transporter, member 11                    | CCDS13052.1     | chr20_3211375-3211375_C_T    | ISV+3> | Substitution | Splice site donor    | 13% |
| MM12T | SLC4A3   | solute carrier family 4, anion exchanger, member 3                               | CCDS2446.1      | chr2_220494796-220494796_C_T | 205P>L | Substitution | Nonsynonymous coding | 21% |
| MM12T | SLC4A3   | solute carrier family 4, anion exchanger, member 3                               | ENST00000413743 | chr2_220496084-220496084_G_A | 42E>K  | Substitution | Nonsynonymous coding | 40% |
| MM12T | SLC4A3   | solute carrier family 4, anion exchanger, member 3                               | CCDS2446.1      | chr2_220500569-220500569_A_G | 743Y>C | Substitution | Nonsynonymous coding | 38% |

|       |         |                                                                                            |                 |                              |        |              |                      |     |
|-------|---------|--------------------------------------------------------------------------------------------|-----------------|------------------------------|--------|--------------|----------------------|-----|
| MM12T | SLC4A8  | solute carrier family 4, sodium bicarbonate cotransporter, member 8                        | CCDS44890.1     | chr12_51847370-51847370_G_A  | 154S>N | Substitution | Nonsynonymous coding | 37% |
| MM12T | SLC52A1 | solute carrier family 52, riboflavin transporter, member 1                                 | CCDS11066.1     | chr17_4936283-4936283_C_T    | 439R>K | Substitution | Nonsynonymous coding | 11% |
| MM12T | SLC52A1 | solute carrier family 52, riboflavin transporter, member 1                                 | CCDS11066.1     | chr17_4937480-4937480_C_T    | 102V>M | Substitution | Nonsynonymous coding | 33% |
| MM12T | SLC52A1 | solute carrier family 52, riboflavin transporter, member 1                                 | CCDS11066.1     | chr17_4937507-4937507_C_T    | 93A>T  | Substitution | Nonsynonymous coding | 28% |
| MM12T | SLC52A2 | solute carrier family 52, riboflavin transporter, member 2 [Source:HGNC Symbol;Acc:30224]  | CCDS6423.1      | chr8_145584478-145584478_C_A | 381L>M | Substitution | Nonsynonymous coding | 26% |
| MM12T | SLC5A1  | solute carrier family 5 (sodium/glucose cotransporter), member 1                           | CCDS13902.1     | chr22_32487710-32487710_G_A  | 414R>H | Substitution | Nonsynonymous coding | 28% |
| MM12T | SLC5A10 | solute carrier family 5 (sodium/glucose cotransporter), member 10                          | CCDS11201.2     | chr17_18872684-18872684_G_A  | 197A>T | Substitution | Nonsynonymous coding | 22% |
| MM12T | SLC5A10 | solute carrier family 5 (sodium/glucose cotransporter), member 10                          | CCDS11201.2     | chr17_18874506-18874506_C_T  | 274A>V | Substitution | Nonsynonymous coding | 37% |
| MM12T | SLC5A10 | solute carrier family 5 (sodium/glucose cotransporter), member 10                          | CCDS11201.2     | chr17_18922861-18922861_C_T  | 472A>V | Substitution | Nonsynonymous coding | 25% |
| MM12T | SLC5A12 | solute carrier family 5 (sodium/glucose cotransporter), member 12                          | CCDS7860.2      | chr11_26718735-26718735_G_A  | 339A>V | Substitution | Nonsynonymous coding | 17% |
| MM12T | SLC5A12 | solute carrier family 5 (sodium/glucose cotransporter), member 12                          | CCDS7860.2      | chr11_26743015-26743015_C_A  | 83V>F  | Substitution | Nonsynonymous coding | 14% |
| MM12T | SLC5A4  | solute carrier family 5 (low affinity glucose cotransporter), member 4                     | CCDS13903.1     | chr22_32620389-32620389_A_C  | 510S>R | Substitution | Nonsynonymous coding | 33% |
| MM12T | SLC5A9  | solute carrier family 5 (sodium/glucose cotransporter), member 9                           | CCDS44136.1     | chr1_48688517-48688517_G_A   | 37D>N  | Substitution | Nonsynonymous coding | 36% |
| MM12T | SLC5A9  | solute carrier family 5 (sodium/glucose cotransporter), member 9                           | CCDS44136.1     | chr1_48708154-48708154_G_A   | 593R>Q | Substitution | Nonsynonymous coding | 26% |
| MM12T | SLC6A11 | solute carrier family 6 (neurotransmitter transporter, GABA), member 11                    | CCDS2602.1      | chr3_10858201-10858201_G_A   | 84G>E  | Substitution | Nonsynonymous coding | 11% |
| MM12T | SLC6A13 | solute carrier family 6 (neurotransmitter transporter, GABA), member 13                    | CCDS8502.1      | chr12_331753-331753_C_A      | 487R>M | Substitution | Nonsynonymous coding | 22% |
| MM12T | SLC6A17 | solute carrier family 6, member 17                                                         | CCDS30799.1     | chr1_110740055-110740055_G_T | ISV-4> | Substitution | Splice site acceptor | 36% |
| MM12T | SLC6A19 | solute carrier family 6 (neutral amino acid transporter), member 19                        | CCDS34130.1     | chr5_1213663-1213663_G_A     | 250G>D | Substitution | Nonsynonymous coding | 29% |
| MM12T | SLC6A19 | solute carrier family 6 (neutral amino acid transporter), member 19                        | CCDS34130.1     | chr5_1214064-1214064_G_A     | ISV-4> | Substitution | Splice site acceptor | 40% |
| MM12T | SLC6A2  | solute carrier family 6 (neurotransmitter transporter, noradrenalin), member 2             | CCDS10754.1     | chr16_55690785-55690785_G_A  | 60G>D  | Substitution | Nonsynonymous coding | 13% |
| MM12T | SLC6A2  | solute carrier family 6 (neurotransmitter transporter, noradrenalin), member 2             | CCDS10754.1     | chr16_55732421-55732421_C_T  | 477A>V | Substitution | Nonsynonymous coding | 27% |
| MM12T | SLC6A6  | solute carrier family 6 (neurotransmitter transporter, taurine), member 6                  | ENST00000428884 | chr3_14485478-14485478_C     | NA     | Insertion    | Frameshift           | 21% |
| MM12T | SLC7A11 | solute carrier family 7 (anionic amino acid transporter light chain, xc- system), member 1 | CCDS3742.1      | chr4_139101945-139101945_C_A | ISV-1> | Substitution | Splice site acceptor | 24% |
| MM12T | SLC7A2  | solute carrier family 7 (cationic amino acid transporter, y+ system), member 2             | CCDS6002.2      | chr8_17419560-17419560_G_A   | 577V>I | Substitution | Nonsynonymous coding | 26% |
| MM12T | SLC7A3  | solute carrier family 7 (cationic amino acid transporter, y+ system), member 3             | CCDS14404.1     | chrX_70148340-70148340_C_T   | 225E>K | Substitution | Nonsynonymous coding | 24% |
| MM12T | SLC7A3  | solute carrier family 7 (cationic amino acid transporter, y+ system), member 3             | CCDS14404.1     | chrX_70149828-70149828_C_T   | 7R>H   | Substitution | Nonsynonymous coding | 18% |
| MM12T | SLC7A4  | solute carrier family 7 (orphan transporter), member 4                                     | CCDS33608.1     | chr22_21383697-21383697_C_T  | 554V>I | Substitution | Nonsynonymous coding | 18% |
| MM12T | SLC7A4  | solute carrier family 7 (orphan transporter), member 4                                     | CCDS33608.1     | chr22_21385306-21385306_G_A  | 266R>W | Substitution | Nonsynonymous coding | 12% |
| MM12T | SLC7A8  | solute carrier family 7 (amino acid transporter light chain, L system), member 8           | CCDS9590.1      | chr14_23607127-23607127_C_T  | ISV+3> | Substitution | Splice site donor    | 28% |
| MM12T | SLC8A1  | solute carrier family 8 (sodium/calcium exchanger), member 1                               | CCDS1806.1      | chr2_40342707-40342707_C_T   | 870V>I | Substitution | Nonsynonymous coding | 12% |
| MM12T | SLC9A3  | solute carrier family 9, subfamily A (NHE3, cation proton antiporter 3), member 3          | CCDS3855.1      | chr5_524284-524284_C_T       | 52V>M  | Substitution | Nonsynonymous coding | 32% |
| MM12T | SLC9A3  | solute carrier family 9, subfamily A (NHE3, cation proton antiporter 3), member 3          | CCDS3855.1      | chr5_474997-474997_C_T       | ISV+1> | Substitution | Splice site donor    | 43% |

|       |         |                                                                                          |             |                               |         |              |                      |     |
|-------|---------|------------------------------------------------------------------------------------------|-------------|-------------------------------|---------|--------------|----------------------|-----|
| MM12T | SLC9A5  | solute carrier family 9, subfamily A (NHE5, cation proton antiporter 5), member 5        | CCDS42178.1 | chr16_67298418-67298418_G_A   | 669R>H  | Substitution | Nonsynonymous coding | 14% |
| MM12T | SLC9A8  | solute carrier family 9, subfamily A (NHE8, cation proton antiporter 8), member 8        | CCDS13421.1 | chr20_48500445-48500445_C_T   | 445R>W  | Substitution | Nonsynonymous coding | 32% |
| MM12T | SLC9C2  | solute carrier family 9, member C2 (putative)                                            | CCDS1308.1  | chr1_173517623-173517623_C_A  | 456V>L  | Substitution | Nonsynonymous coding | 16% |
| MM12T | SLCO1C1 | solute carrier organic anion transporter family, member 1C1                              | CCDS8683.1  | chr12_20868126-20868126_C_A   | 195L>I  | Substitution | Nonsynonymous coding | 35% |
| MM12T | SLCO2A1 | solute carrier organic anion transporter family, member 2A1                              | CCDS3084.1  | chr3_133666230-133666230_G_A  | 389R>C  | Substitution | Nonsynonymous coding | 28% |
| MM12T | SLCO3A1 | solute carrier organic anion transporter family, member 3A1                              | CCDS10371.1 | chr15_92706160-92706160_C_T   | 643T>I  | Substitution | Nonsynonymous coding | 32% |
| MM12T | SLCO4A1 | solute carrier organic anion transporter family, member 4A1                              | CCDS13501.1 | chr20_61288426-61288426_C_T   | 207T>M  | Substitution | Nonsynonymous coding | 37% |
| MM12T | SLCO6A1 | solute carrier organic anion transporter family, member 6A1                              | CCDS34206.1 | chr5_101755708-101755708_C_T  | 432G>R  | Substitution | Nonsynonymous coding | 15% |
| MM12T | SLFN11  | schlafen family member 11                                                                | CCDS11294.1 | chr17_33679635-33679635_C_T   | 816A>T  | Substitution | Nonsynonymous coding | 12% |
| MM12T | SLFN5   | schlafen family member 5                                                                 | CCDS32619.1 | chr17_33586586-33586586_G_A   | 293V>I  | Substitution | Nonsynonymous coding | 23% |
| MM12T | SLFN5   | schlafen family member 5                                                                 | CCDS32619.1 | chr17_33586718-33586718_C_T   | 337P>S  | Substitution | Nonsynonymous coding | 50% |
| MM12T | SLITRK2 | SLIT and NTRK-like family, member 2                                                      | CCDS14680.1 | chrX_144904451-144904451_C_A  | 170L>M  | Substitution | Nonsynonymous coding | 30% |
| MM12T | SLITRK3 | SLIT and NTRK-like family, member 3                                                      | CCDS3197.1  | chr3_164908116-164908116_G_A  | 168A>V  | Substitution | Nonsynonymous coding | 29% |
| MM12T | SLITRK4 | SLIT and NTRK-like family, member 4                                                      | CCDS14679.1 | chrX_142718108-142718108_G_A  | 273R>C  | Substitution | Nonsynonymous coding | 28% |
| MM12T | SLK     | STE20-like kinase                                                                        | CCDS7553.1  | chr10_105770629-105770629_G_A | 947R>H  | Substitution | Nonsynonymous coding | 27% |
| MM12T | SLMAP   | sarcolemma associated protein                                                            | CCDS33774.1 | chr3_57743509-57743509_C_T    | 44A>V   | Substitution | Nonsynonymous coding | 12% |
| MM12T | SLMAP   | sarcolemma associated protein                                                            | CCDS33774.1 | chr3_57908701-57908701_T_A    | 765L>H  | Substitution | Nonsynonymous coding | 25% |
| MM12T | SLX4    | SLX4 structure-specific endonuclease subunit homolog (S. cerevisiae)                     | CCDS10506.2 | chr16_3641270-3641270_G_T     | 790P>H  | Substitution | Nonsynonymous coding | 32% |
| MM12T | SLX4    | SLX4 structure-specific endonuclease subunit homolog (S. cerevisiae)                     | CCDS10506.2 | chr16_3642754-3642754_G_A     | 758A>V  | Substitution | Nonsynonymous coding | 33% |
| MM12T | SLX4    | SLX4 structure-specific endonuclease subunit homolog (S. cerevisiae)                     | CCDS10506.2 | chr16_3646198-3646198_G_A     | 627P>L  | Substitution | Nonsynonymous coding | 31% |
| MM12T | SLX4IP  | SLX4 interacting protein                                                                 | CCDS33439.1 | chr20_10603686-10603686_C_T   | 296R>C  | Substitution | Nonsynonymous coding | 25% |
| MM12T | SMAD4   | SMAD family member 4                                                                     | CCDS11950.1 | chr18_48581203-48581203_G_T   | 169Q>H  | Substitution | Nonsynonymous coding | 32% |
| MM12T | SMAD6   | SMAD family member 6                                                                     | CCDS10221.1 | chr15_67073337-67073337_G_A   | 319A>T  | Substitution | Nonsynonymous coding | 53% |
| MM12T | SMAD7   | SMAD family member 7                                                                     | CCDS11936.1 | chr18_46468866-46468866_G_T   | 243P>T  | Substitution | Nonsynonymous coding | 33% |
| MM12T | SMARCA1 | SWI/SNF related, matrix associated, actin dependent regulator of chromatin, subfamily    | CCDS14612.1 | chrX_128640113-128640113_G_A  | 348H>Y  | Substitution | Nonsynonymous coding | 22% |
| MM12T | SMARCA4 | SWI/SNF related, matrix associated, actin dependent regulator of chromatin, subfamily    | CCDS45971.1 | chr19_11134251-11134251_C_T   | 973R>W  | Substitution | Nonsynonymous coding | 28% |
| MM12T | SMARCA4 | SWI/SNF related, matrix associated, actin dependent regulator of chromatin, subfamily    | CCDS45971.1 | chr19_11143994-11143994_G_A   | 1192R>H | Substitution | Nonsynonymous coding | 34% |
| MM12T | SMARCA4 | SWI/SNF related, matrix associated, actin dependent regulator of chromatin, subfamily    | CCDS45971.1 | chr19_11144522-11144522_T_C   | 1285L>S | Substitution | Nonsynonymous coding | 37% |
| MM12T | SMARCA4 | SWI/SNF related, matrix associated, actin dependent regulator of chromatin, subfamily    | CCDS45971.1 | chr19_11144847-11144847_C_T   | 1308R>W | Substitution | Nonsynonymous coding | 13% |
| MM12T | SMARCA5 | SWI/SNF related, matrix associated, actin dependent regulator of chromatin, subfamily    | CCDS3761.1  | chr4_144449106-144449106_T_C  | 296V>A  | Substitution | Nonsynonymous coding | 27% |
| MM12T | SMARCC1 | SWI/SNF related, matrix associated, actin dependent regulator of chromatin, subfamily c, | CCDS2758.1  | chr3_47787435-47787435_G_A    | 122L>F  | Substitution | Nonsynonymous coding | 21% |
| MM12T | SMARCC2 | SWI/SNF related, matrix associated, actin dependent regulator of chromatin, subfamily c, | CCDS8907.1  | chr12_56566406-56566406_C_T   | 578R>H  | Substitution | Nonsynonymous coding | 15% |

|       |         |                                                                                  |             |                               |         |              |                      |     |
|-------|---------|----------------------------------------------------------------------------------|-------------|-------------------------------|---------|--------------|----------------------|-----|
| MM12T | SMC1A   | structural maintenance of chromosomes 1A                                         | CCDS14352.1 | chrX_53407587-53407587_T_A    | 1191E>V | Substitution | Nonsynonymous coding | 19% |
| MM12T | SMC1A   | structural maintenance of chromosomes 1A                                         | CCDS14352.1 | chrX_53430549-53430549_C_T    | 790R>Q  | Substitution | Nonsynonymous coding | 32% |
| MM12T | SMC1A   | structural maintenance of chromosomes 1A                                         | CCDS14352.1 | chrX_53432057-53432057_C_A    | 695E>X  | Substitution | Nonsense             | 29% |
| MM12T | SMC1B   | structural maintenance of chromosomes 1B                                         | CCDS43027.1 | chr22_45755738-45755738_C_A   | 937D>Y  | Substitution | Nonsynonymous coding | 11% |
| MM12T | SMC2    | structural maintenance of chromosomes 2                                          | CCDS35086.1 | chr9_106873998-106873998_G_A  | 386G>D  | Substitution | Nonsynonymous coding | 16% |
| MM12T | SMC2    | structural maintenance of chromosomes 2                                          | CCDS35086.1 | chr9_106901462-106901462_A_T  | 1154N>Y | Substitution | Nonsynonymous coding | 28% |
| MM12T | SMCR7   | Smith-Magenis syndrome chromosome region, candidate 7                            | CCDS45624.1 | chr17_18167182-18167182_G_A   | 168A>T  | Substitution | Nonsynonymous coding | 25% |
| MM12T | SMCR7L  | Smith-Magenis syndrome chromosome region, candidate 7-like                       | CCDS13995.1 | chr22_39907349-39907349_G_A   | 17G>D   | Substitution | Nonsynonymous coding | 14% |
| MM12T | SMEK2   | SMEK homolog 2, suppressor of mek1 (Dictyostelium)                               | CCDS46289.1 | chr2_55831169-55831169_G_T    | 81A>D   | Substitution | Nonsynonymous coding | 10% |
| MM12T | SMG1    | smg-1 homolog, phosphatidylinositol 3-kinase-related kinase (C. elegans)         | CCDS45430.1 | chr16_18853743-18853743_G_A   | 2085R>C | Substitution | Nonsynonymous coding | 22% |
| MM12T | SMG7    | smg-7 homolog, nonsense mediated mRNA decay factor (C. elegans)                  | CCDS1355.1  | chr1_183502894-183502894_G_A  | 364V>I  | Substitution | Nonsynonymous coding | 27% |
| MM12T | SMO     | smoothened, frizzled family receptor                                             | CCDS5811.1  | chr7_128846088-128846088_C_T  | 340H>Y  | Substitution | Nonsynonymous coding | 30% |
| MM12T | SMOX    | spermine oxidase                                                                 | CCDS13075.1 | chr20_4158003-4158003_G_A     | 72A>T   | Substitution | Nonsynonymous coding | 33% |
| MM12T | SMPD4   | sphingomyelin phosphodiesterase 4, neutral membrane (neutral sphingomyelinase-3) | CCDS42751.1 | chr2_130911948-130911948_C_T  | 560V>I  | Substitution | Nonsynonymous coding | 10% |
| MM12T | SMPDL3B | sphingomyelin phosphodiesterase, acid-like 3B                                    | CCDS30655.1 | chr1_28282307-28282307_G_A    | 268R>H  | Substitution | Nonsynonymous coding | 29% |
| MM12T | SMTN    | smoothenin                                                                       | CCDS13887.1 | chr22_31486821-31486821_G_A   | 298R>H  | Substitution | Nonsynonymous coding | 10% |
| MM12T | SMURF1  | SMAD specific E3 ubiquitin protein ligase 1                                      | CCDS34690.1 | chr7_98655044-98655044_C_T    | 112G>R  | Substitution | Nonsynonymous coding | 29% |
| MM12T | SMYD4   | SET and MYND domain containing 4                                                 | CCDS11013.1 | chr17_1703966-1703966_G_T     | 241P>H  | Substitution | Nonsynonymous coding | 31% |
| MM12T | SMYD5   | SMYD family member 5                                                             | CCDS33221.2 | chr2_73447910-73447910_G_A    | 156R>K  | Substitution | Nonsynonymous coding | 11% |
| MM12T | SNAP47  | synaptosomal-associated protein, 47kDa                                           | CCDS1562.1  | chr1_227935616-227935616_C_T  | 105A>V  | Substitution | Nonsynonymous coding | 10% |
| MM12T | SNAP91  | synaptosomal-associated protein, 91kDa                                           | CCDS47455.1 | chr6_84326684-84326684_G_A    | ISV+4>  | Substitution | Splice site donor    | 14% |
| MM12T | SNAPC4  | small nuclear RNA activating complex, polypeptide 4, 190kDa                      | CCDS6998.1  | chr9_139275306-139275306_C_T  | ISV-4>  | Substitution | Splice site acceptor | 10% |
| MM12T | SND1    | staphylococcal nuclease and tudor domain containing 1                            | CCDS34747.1 | chr7_127714723-127714723_C_T  | 650A>V  | Substitution | Nonsynonymous coding | 23% |
| MM12T | SNRK    | SNF related kinase                                                               | CCDS43075.1 | chr3_43389650-43389650_G_A    | 633M>I  | Substitution | Nonsynonymous coding | 31% |
| MM12T | SNRNP27 | small nuclear ribonucleoprotein 27kDa (U4/U6.U5)                                 | CCDS33219.1 | chr2_70122271-70122271_G_A    | 27R>H   | Substitution | Nonsynonymous coding | 11% |
| MM12T | SNRNP35 | small nuclear ribonucleoprotein 35kDa (U11/U12)                                  | CCDS45005.1 | chr12_123950688-123950688_C_T | 206R>X  | Substitution | Nonsense             | 33% |
| MM12T | SNRPA   | small nuclear ribonucleoprotein polypeptide A                                    | CCDS12565.1 | chr19_41270935-41270935_C_T   | 238R>C  | Substitution | Nonsynonymous coding | 15% |
| MM12T | SNTG2   | syntrophin, gamma 2                                                              | CCDS46220.1 | chr2_1204826-1204826_C_T      | 210P>L  | Substitution | Nonsynonymous coding | 43% |
| MM12T | SNTG2   | syntrophin, gamma 2                                                              | CCDS46220.1 | chr2_1204861-1204861_G_A      | 222V>M  | Substitution | Nonsynonymous coding | 21% |
| MM12T | SNX14   | sorting nexin 14                                                                 | CCDS5004.1  | chr6_86259447-86259447_T_C    | 262D>G  | Substitution | Nonsynonymous coding | 66% |
| MM12T | SNX18   | sorting nexin 18                                                                 | CCDS3962.1  | chr5_53814044-53814044_C_T    | 88P>S   | Substitution | Nonsynonymous coding | 12% |
| MM12T | SNX19   | sorting nexin 19                                                                 | CCDS31721.1 | chr11_130780269-130780269_C_  | NA      | Deletion     | Splice site acceptor | 50% |



|       |        |                                                             |             |                               |         |              |                      |     |
|-------|--------|-------------------------------------------------------------|-------------|-------------------------------|---------|--------------|----------------------|-----|
| MM12T | SNX20  | sorting nexin 20                                            | CCDS10745.1 | chr16_50707697-50707697_C_T   | 191E>K  | Substitution | Nonsynonymous coding | 30% |
| MM12T | SNX8   | sorting nexin 8                                             | CCDS5331.1  | chr7_2314807-2314807_G_A      | 120L>F  | Substitution | Nonsynonymous coding | 30% |
| MM12T | SOAT1  | sterol O-acyltransferase 1                                  | CCDS1330.1  | chr1_179312069-179312069_G_A  | 311S>N  | Substitution | Nonsynonymous coding | 32% |
| MM12T | SOCS4  | suppressor of cytokine signaling 4                          | CCDS9722.1  | chr14_55510313-55510313_T_C   | 185I>T  | Substitution | Nonsynonymous coding | 28% |
| MM12T | SOLH   | small optic lobes homolog (Drosophila)                      | CCDS10410.1 | chr16_597515-597515_C_T       | 226P>L  | Substitution | Nonsynonymous coding | 28% |
| MM12T | SOLH   | small optic lobes homolog (Drosophila)                      | CCDS10410.1 | chr16_598073-598073_G_A       | 412R>H  | Substitution | Nonsynonymous coding | 21% |
| MM12T | SOLH   | small optic lobes homolog (Drosophila)                      | CCDS10410.1 | chr16_599161-599161_C_T       | 540R>W  | Substitution | Nonsynonymous coding | 26% |
| MM12T | SORBS2 | sorbin and SH3 domain containing 2                          | CCDS3845.1  | chr4_186544848-186544848_C_T  | 575A>T  | Substitution | Nonsynonymous coding | 12% |
| MM12T | SORBS2 | sorbin and SH3 domain containing 2                          | CCDS3845.1  | chr4_186545595-186545595_C_T  | 326G>S  | Substitution | Nonsynonymous coding | 42% |
| MM12T | SORBS3 | sorbin and SH3 domain containing 3                          | CCDS6031.1  | chr8_22414269-22414269_C_T    | 88P>S   | Substitution | Nonsynonymous coding | 30% |
| MM12T | SORCS1 | sortilin-related VPS10 domain containing receptor 1         | CCDS31283.1 | chr10_108459081-108459081_G_A | 435T>M  | Substitution | Nonsynonymous coding | 29% |
| MM12T | SORCS1 | sortilin-related VPS10 domain containing receptor 1         | CCDS31283.1 | chr10_108923830-108923830_C_T | 152R>H  | Substitution | Nonsynonymous coding | 14% |
| MM12T | SORCS2 | sortilin-related VPS10 domain containing receptor 2         | CCDS47008.1 | chr4_7640121-7640121_G_A      | 239A>T  | Substitution | Nonsynonymous coding | 13% |
| MM12T | SORCS3 | sortilin-related VPS10 domain containing receptor 3         | CCDS7558.1  | chr10_106401468-106401468_C_T | 128A>V  | Substitution | Nonsynonymous coding | 10% |
| MM12T | SORCS3 | sortilin-related VPS10 domain containing receptor 3         | CCDS7558.1  | chr10_106907418-106907418_C_T | 449A>V  | Substitution | Nonsynonymous coding | 11% |
| MM12T | SORCS3 | sortilin-related VPS10 domain containing receptor 3         | CCDS7558.1  | chr10_106976859-106976859_G_A | 905V>I  | Substitution | Nonsynonymous coding | 12% |
| MM12T | SORCS3 | sortilin-related VPS10 domain containing receptor 3         | CCDS7558.1  | chr10_107015554-107015554_C_T | 1111T>M | Substitution | Nonsynonymous coding | 25% |
| MM12T | SORL1  | sortilin-related receptor, (DLR class) A repeats containing | CCDS8436.1  | chr11_121323237-121323237_C_T | 66A>V   | Substitution | Nonsynonymous coding | 12% |
| MM12T | SORL1  | sortilin-related receptor, (DLR class) A repeats containing | CCDS8436.1  | chr11_121340771-121340771_G_A | 114S>N  | Substitution | Nonsynonymous coding | 11% |
| MM12T | SOST   | sclerostin                                                  | CCDS11468.1 | chr17_41832976-41832976_G_A   | 126R>X  | Substitution | Nonsense             | 11% |
| MM12T | SOWAHA | sosondowah ankyrin repeat domain family member A            | CCDS43361.1 | chr5_132149972-132149972_C_T  | 220P>L  | Substitution | Nonsynonymous coding | 46% |
| MM12T | SOWAHC | sosondowah ankyrin repeat domain family member C            | CCDS33270.1 | chr2_110372503-110372503_C_T  | 146P>L  | Substitution | Nonsynonymous coding | 31% |
| MM12T | SOWAHD | sosondowah ankyrin repeat domain family member D            | CCDS43984.1 | chrX_118892650-118892650_C_T  | 7A>V    | Substitution | Nonsynonymous coding | 33% |
| MM12T | SOX10  | SRY (sex determining region Y)-box 10                       | CCDS13964.1 | chr22_38374089-38374089_C_T   | 161R>H  | Substitution | Nonsynonymous coding | 15% |
| MM12T | SOX10  | SRY (sex determining region Y)-box 10                       | CCDS13964.1 | chr22_38374108-38374108_C_T   | 155E>K  | Substitution | Nonsynonymous coding | 25% |
| MM12T | SOX3   | SRY (sex determining region Y)-box 3                        | CCDS14669.1 | chrX_139587182-139587182_C_T  | 15R>Q   | Substitution | Nonsynonymous coding | 26% |
| MM12T | SOX30  | SRY (sex determining region Y)-box 30                       | CCDS4339.1  | chr5_157073704-157073704_C_T  | 443R>H  | Substitution | Nonsynonymous coding | 22% |
| MM12T | SOX30  | SRY (sex determining region Y)-box 30                       | CCDS4339.1  | chr5_157078524-157078524_G_A  | 188A>V  | Substitution | Nonsynonymous coding | 34% |
| MM12T | SOX5   | SRY (sex determining region Y)-box 5                        | CCDS8699.1  | chr12_23689427-23689427_G_A   | 650R>C  | Substitution | Nonsynonymous coding | 28% |
| MM12T | SOX6   | SRY (sex determining region Y)-box 6                        | CCDS7821.1  | chr11_16036587-16036587_G_A   | 545R>C  | Substitution | Nonsynonymous coding | 16% |
| MM12T | SP100  | SP100 nuclear antigen                                       | CCDS42832.1 | chr2_231368952-231368952_C_A  | 606P>H  | Substitution | Nonsynonymous coding | 26% |
| MM12T | SP6    | Sp6 transcription factor                                    | CCDS11520.1 | chr17_45925003-45925003_A_G   | 265Y>H  | Substitution | Nonsynonymous coding | 21% |

|       |           |                                                                         |              |                              |         |              |                      |     |
|-------|-----------|-------------------------------------------------------------------------|--------------|------------------------------|---------|--------------|----------------------|-----|
| MM12T | SP7       | Sp7 transcription factor                                                | CCDS44897.1  | chr12_53722544-53722544_C_T  | 228V>I  | Substitution | Nonsynonymous coding | 27% |
| MM12T | SPAG16    | sperm associated antigen 16                                             | CCDS2396.1   | chr2_214727290-214727290_C_A | 384C>X  | Substitution | Nonsense             | 10% |
| MM12T | SPAG4     | sperm associated antigen 4                                              | CCDS13259.1  | chr20_34206016-34206016_G_A  | 182W>X  | Substitution | Nonsense             | 10% |
| MM12T | SPAG5     | sperm associated antigen 5                                              | CCDS32594.1  | chr17_26919165-26919165_G_A  | 366P>L  | Substitution | Nonsynonymous coding | 11% |
| MM12T | SPAG8     | sperm associated antigen 8                                              | CCDS6592.1   | chr9_35811669-35811669_G_A   | 125T>I  | Substitution | Nonsynonymous coding | 36% |
| MM12T | SPAG9     | sperm associated antigen 9                                              | CCDS45740.1  | chr17_49075896-49075896_A_G  | 583S>P  | Substitution | Nonsynonymous coding | 26% |
| MM12T | SPAG9     | sperm associated antigen 9                                              | CCDS45740.1  | chr17_49124752-49124752_C_T  | 192A>T  | Substitution | Nonsynonymous coding | 19% |
| MM12T | SPAM1     | sperm adhesion molecule 1 (PH-20 hyaluronidase, zona pellucida binding) | CCDS5790.1   | chr7_123594460-123594460_G_A | 279R>H  | Substitution | Nonsynonymous coding | 12% |
| MM12T | SPARC     | secreted protein, acidic, cysteine-rich (osteonectin)                   | CCDS4318.1   | chr5_151047030-151047030_G_A | 195R>W  | Substitution | Nonsynonymous coding | 36% |
| MM12T | SPARC     | secreted protein, acidic, cysteine-rich (osteonectin)                   | CCDS4318.1   | chr5_151047092-151047092_A_G | 174V>A  | Substitution | Nonsynonymous coding | 11% |
| MM12T | SPARCL1   | SPARC-like 1 (hevin)                                                    | CCDS3622.1   | chr4_88403695-88403695_C_T   | 517D>N  | Substitution | Nonsynonymous coding | 24% |
| MM12T | SPATA13   | spermatogenesis associated 13                                           | NM_001166271 | chr13_24798688-24798688_G_A  | 541A>T  | Substitution | Nonsynonymous coding | 12% |
| MM12T | SPATA13   | spermatogenesis associated 13                                           | NM_001166271 | chr13_24823718-24823718_G_T  | 586R>M  | Substitution | Nonsynonymous coding | 35% |
| MM12T | SPATA16   | spermatogenesis associated 16                                           | CCDS3221.1   | chr3_172694817-172694817_A_G | 292F>L  | Substitution | Nonsynonymous coding | 10% |
| MM12T | SPATA2    | spermatogenesis associated 2                                            | CCDS13422.1  | chr20_48523129-48523129_C_T  | 197R>H  | Substitution | Nonsynonymous coding | 32% |
| MM12T | SPATA20   | spermatogenesis associated 20                                           | CCDS11571.1  | chr17_48626648-48626648_G_T  | 221W>L  | Substitution | Nonsynonymous coding | 38% |
| MM12T | SPATA21   | spermatogenesis associated 21                                           | CCDS172.1    | chr1_16748027-16748027_C_A   | 41A>S   | Substitution | Nonsynonymous coding | 31% |
| MM12T | SPATA2L   | spermatogenesis associated 2-like                                       | CCDS10985.1  | chr16_89763869-89763869_G_A  | 383A>V  | Substitution | Nonsynonymous coding | 36% |
| MM12T | SPATA31D1 | SPATA31 subfamily D, member 1                                           | CCDS47986.1  | chr9_84610019-84610019_G_A   | 1545S>N | Substitution | Nonsynonymous coding | 28% |
| MM12T | SPATA31E1 | SPATA31 subfamily E, member 1                                           | CCDS6676.1   | chr9_90500483-90500483_G_A   | 361V>M  | Substitution | Nonsynonymous coding | 36% |
| MM12T | SPATA31E1 | SPATA31 subfamily E, member 1                                           | CCDS6676.1   | chr9_90500586-90500586_G_T   | 395G>V  | Substitution | Nonsynonymous coding | 31% |
| MM12T | SPATA31E1 | SPATA31 subfamily E, member 1                                           | CCDS6676.1   | chr9_90501786-90501786_C_A   | 795A>D  | Substitution | Nonsynonymous coding | 30% |
| MM12T | SPATA31E1 | SPATA31 subfamily E, member 1                                           | CCDS6676.1   | chr9_90502844-90502844_G_T   | 1148A>S | Substitution | Nonsynonymous coding | 14% |
| MM12T | SPATA5    | spermatogenesis associated 5                                            | CCDS3730.1   | chr4_123855860-123855860_C_T | 372P>S  | Substitution | Nonsynonymous coding | 41% |
| MM12T | SPATA5L1  | spermatogenesis associated 5-like 1                                     | CCDS10123.1  | chr15_45706841-45706841_C_A  | 503L>I  | Substitution | Nonsynonymous coding | 15% |
| MM12T | SPATA6    | spermatogenesis associated 6                                            | CCDS551.1    | chr1_48877222-48877222_C_T   | 107D>N  | Substitution | Nonsynonymous coding | 19% |
| MM12T | SPATA6L   | spermatogenesis associated 6-like                                       | CCDS43785.1  | chr9_4629171-4629171_AAAA    | NA      | Insertion    | Splice site acceptor | 50% |
| MM12T | SPATA7    | spermatogenesis associated 7                                            | CCDS9883.1   | chr14_88892912-88892912_C_T  | 237Q>X  | Substitution | Nonsense             | 30% |
| MM12T | SPEF2     | sperm flagellar 2                                                       | CCDS43309.1  | chr5_35697801-35697801_C_T   | 683R>C  | Substitution | Nonsynonymous coding | 22% |
| MM12T | SPEG      | SPEG complex locus                                                      | CCDS42824.1  | chr2_220315912-220315912_T_C | 723V>A  | Substitution | Nonsynonymous coding | 19% |
| MM12T | SPEG      | SPEG complex locus                                                      | CCDS42824.1  | chr2_220355664-220355664_C_T | 3124T>M | Substitution | Nonsynonymous coding | 39% |
| MM12T | SPEM1     | spermatid maturation 1                                                  | CCDS42254.1  | chr17_7324682-7324682_G_A    | 230A>T  | Substitution | Nonsynonymous coding | 30% |

|       |        |                                                                                             |                 |                              |         |              |                      |     |
|-------|--------|---------------------------------------------------------------------------------------------|-----------------|------------------------------|---------|--------------|----------------------|-----|
| MM12T | SPEN   | spen homolog, transcriptional regulator (Drosophila)                                        | CCDS164.1       | chr1_16242743-16242743_G_A   | 455R>H  | Substitution | Nonsynonymous coding | 10% |
| MM12T | SPERT  | spermatid associated                                                                        | CCDS9399.1      | chr13_46287386-46287386_G_A  | 76A>T   | Substitution | Nonsynonymous coding | 12% |
| MM12T | SPERT  | spermatid associated                                                                        | CCDS9399.1      | chr13_46287966-46287966_C_T  | 269A>V  | Substitution | Nonsynonymous coding | 26% |
| MM12T | SPG7   | spastic paraplegia 7 (pure and complicated autosomal recessive)                             | CCDS10977.1     | chr16_89611163-89611163_G_A  | 478D>N  | Substitution | Nonsynonymous coding | 13% |
| MM12T | SPHK2  | sphingosine kinase 2                                                                        | CCDS12727.1     | chr19_49132189-49132189_G_A  | 375R>H  | Substitution | Nonsynonymous coding | 14% |
| MM12T | SPHKAP | SPHK1 interactor, AKAP domain containing                                                    | CCDS46537.1     | chr2_228883658-228883658_C_A | 638D>Y  | Substitution | Nonsynonymous coding | 18% |
| MM12T | SPN    | sialophorin                                                                                 | CCDS10650.1     | chr16_29675116-29675116_G_T  | 23A>S   | Substitution | Nonsynonymous coding | 29% |
| MM12T | SPNS3  | spinster homolog 3 (Drosophila)                                                             | CCDS11045.1     | chr17_4389519-4389519_G_A    | ISV-4>  | Substitution | Splice site acceptor | 12% |
| MM12T | SPOCK3 | sparc/osteonectin, cwcv and kazal-like domains proteoglycan (testican) 3                    | CCDS34095.1     | chr4_167675659-167675659_C_A | 311D>Y  | Substitution | Nonsynonymous coding | 26% |
| MM12T | SPON1  | spondin 1, extracellular matrix protein                                                     | ENST00000310358 | chr11_14287120-14287120_G_A  | 770G>R  | Substitution | Nonsynonymous coding | 27% |
| MM12T | SPRED1 | sprouty-related, EVH1 domain containing 1                                                   | CCDS32193.1     | chr15_38632038-38632038_C_T  | 175P>L  | Substitution | Nonsynonymous coding | 24% |
| MM12T | SPRED3 | sprouty-related, EVH1 domain containing 3                                                   | CCDS42560.1     | chr19_38886167-38886167_G_T  | 205E>D  | Substitution | Nonsynonymous coding | 17% |
| MM12T | SPTA1  | spectrin, alpha, erythrocytic 1 (elliptycrosis 2)                                           | CCDS41423.1     | chr1_158607971-158607971_C_T | 1681V>I | Substitution | Nonsynonymous coding | 19% |
| MM12T | SPTAN1 | spectrin, alpha, non-erythrocytic 1                                                         | CCDS48036.1     | chr9_131331175-131331175_G_A | 121R>Q  | Substitution | Nonsynonymous coding | 27% |
| MM12T | SPTAN1 | spectrin, alpha, non-erythrocytic 1                                                         | CCDS48036.1     | chr9_131339422-131339422_C_T | 267T>I  | Substitution | Nonsynonymous coding | 31% |
| MM12T | SPTAN1 | spectrin, alpha, non-erythrocytic 1                                                         | CCDS48036.1     | chr9_131339764-131339764_C_T | 355A>V  | Substitution | Nonsynonymous coding | 35% |
| MM12T | SPTAN1 | spectrin, alpha, non-erythrocytic 1                                                         | CCDS48036.1     | chr9_131395555-131395555_G_A | 2459R>H | Substitution | Nonsynonymous coding | 34% |
| MM12T | SPTB   | spectrin, beta, erythrocytic                                                                | CCDS32099.1     | chr14_65237714-65237714_C_T  | 1896R>Q | Substitution | Nonsynonymous coding | 14% |
| MM12T | SPTB   | spectrin, beta, erythrocytic                                                                | CCDS32099.1     | chr14_65253362-65253362_C_A  | 1107K>N | Substitution | Nonsynonymous coding | 31% |
| MM12T | SPTBN2 | spectrin, beta, non-erythrocytic 2                                                          | CCDS8150.1      | chr11_66460504-66460504_G_A  | 1641A>V | Substitution | Nonsynonymous coding | 35% |
| MM12T | SPTBN5 | spectrin, beta, non-erythrocytic 5                                                          | NM_016642       | chr15_42144411-42144411_C_T  | 3483G>E | Substitution | Nonsynonymous coding | 17% |
| MM12T | SPTBN5 | spectrin, beta, non-erythrocytic 5                                                          | NM_016642       | chr15_42174166-42174166_G_A  | 774R>W  | Substitution | Nonsynonymous coding | 18% |
| MM12T | SQLE   | squalene epoxidase                                                                          | CCDS47918.1     | chr8_126011860-126011860_G_A | 72G>D   | Substitution | Nonsynonymous coding | 10% |
| MM12T | SQSTM1 | sequestosome 1                                                                              | CCDS34317.1     | chr5_179251300-179251300_G_A | 217R>H  | Substitution | Nonsynonymous coding | 26% |
| MM12T | SQSTM1 | sequestosome 1                                                                              | CCDS34317.1     | chr5_179263445-179263445_C_A | 392P>Q  | Substitution | Nonsynonymous coding | 12% |
| MM12T | SRC    | v-src sarcoma (Schmidt-Ruppin A-2) viral oncogene homolog (avian)                           | CCDS13294.1     | chr20_36031642-36031642_C_T  | 491P>S  | Substitution | Nonsynonymous coding | 24% |
| MM12T | SRCAP  | Snf2-related CREBBP activator protein                                                       | CCDS10689.2     | chr16_30740771-30740771_G_A  | 2002R>H | Substitution | Nonsynonymous coding | 35% |
| MM12T | SRD5A2 | steroid-5-alpha-reductase, alpha polypeptide 2 (3-oxo-5 alpha-steroid delta 4-dehydrogenase | ENST00000233139 | chr2_31758684-31758684_C_T   | 144R>Q  | Substitution | Nonsynonymous coding | 39% |
| MM12T | SREBF1 | sterol regulatory element binding transcription factor 1                                    | CCDS32583.1     | chr17_17718056-17718056_C_T  | 900D>N  | Substitution | Nonsynonymous coding | 13% |
| MM12T | SREBF1 | sterol regulatory element binding transcription factor 1                                    | CCDS32583.1     | chr17_17723791-17723791_G_T  | 76L>I   | Substitution | Nonsynonymous coding | 11% |
| MM12T | SREK1  | splicing regulatory glutamine/lysine-rich protein 1                                         | CCDS43323.1     | chr5_65449296-65449296_C_T   | 56A>V   | Substitution | Nonsynonymous coding | 28% |
| MM12T | SRF    | serum response factor (c-fos serum response element-binding transcription factor)           | CCDS4889.1      | chr6_43146861-43146861_G_A   | 487S>N  | Substitution | Nonsynonymous coding | 19% |

|       |         |                                                                           |                 |                               |         |              |                      |     |
|-------|---------|---------------------------------------------------------------------------|-----------------|-------------------------------|---------|--------------|----------------------|-----|
| MM12T | SRPK1   | SRSF protein kinase 1                                                     | CCDS47415.1     | chr6_35810384-35810384_A_     | NA      | Deletion     | Splice site acceptor | 35% |
| MM12T | SRRM2   | serine/arginine repetitive matrix 2                                       | CCDS32373.1     | chr16_2809656-2809656_G_A     | 276R>H  | Substitution | Nonsynonymous coding | 68% |
| MM12T | SRRM2   | serine/arginine repetitive matrix 2                                       | CCDS32373.1     | chr16_2814674-2814674_G_A     | 1382S>N | Substitution | Nonsynonymous coding | 19% |
| MM12T | SRRM2   | serine/arginine repetitive matrix 2                                       | CCDS32373.1     | chr16_2816519-2816519_G_A     | 1997R>H | Substitution | Nonsynonymous coding | 34% |
| MM12T | SRRM3   | serine/arginine repetitive matrix 3                                       | ENST00000388802 | chr7_75914934-75914934__A     | NA      | Insertion    | Frameshift           | 21% |
| MM12T | SRRM4   | serine/arginine repetitive matrix 4                                       | CCDS44994.1     | chr12_119583185-119583185_G_A | ISV-1>  | Substitution | Splice site acceptor | 25% |
| MM12T | SRRT    | serrate RNA effector molecule homolog (Arabidopsis)                       | CCDS34709.1     | chr7_100478937-100478937_C_T  | 52R>W   | Substitution | Nonsynonymous coding | 39% |
| MM12T | SRRT    | serrate RNA effector molecule homolog (Arabidopsis)                       | CCDS34709.1     | chr7_100479421-100479421_G_T  | 131Q>H  | Substitution | Nonsynonymous coding | 35% |
| MM12T | SRRT    | serrate RNA effector molecule homolog (Arabidopsis)                       | CCDS34709.1     | chr7_100483914-100483914_G_A  | 502R>Q  | Substitution | Nonsynonymous coding | 44% |
| MM12T | SRRT    | serrate RNA effector molecule homolog (Arabidopsis)                       | CCDS34709.1     | chr7_100485033-100485033_C_T  | 690R>C  | Substitution | Nonsynonymous coding | 19% |
| MM12T | SRSF10  | serine/arginine-rich splicing factor 10                                   | CCDS30630.1     | chr1_24298091-24298091_G_A    | 155R>C  | Substitution | Nonsynonymous coding | 33% |
| MM12T | SRSF5   | serine/arginine-rich splicing factor 5                                    | CCDS32109.1     | chr14_70237227-70237227_C_T   | 137A>V  | Substitution | Nonsynonymous coding | 10% |
| MM12T | SRSF6   | serine/arginine-rich splicing factor 6                                    | CCDS13318.1     | chr20_42089213-42089213_C_T   | 217R>X  | Substitution | Nonsense             | 33% |
| MM12T | SSFA2   | sperm specific antigen 2                                                  | CCDS46467.1     | chr2_182767188-182767188_G_A  | 470E>K  | Substitution | Nonsynonymous coding | 13% |
| MM12T | SSH1    | slingshot homolog 1 (Drosophila)                                          | CCDS9121.1      | chr12_109246447-109246447_G_A | 26A>V   | Substitution | Nonsynonymous coding | 32% |
| MM12T | SSPN    | sarcospan                                                                 | CCDS8707.1      | chr12_26383695-26383695_G_A   | 140V>M  | Substitution | Nonsynonymous coding | 48% |
| MM12T | SSPO    | SCO-spondin homolog (Bos taurus)                                          | ENST00000378016 | chr7_149473608-149473608_C_A  | 75P>H   | Substitution | Nonsynonymous coding | 43% |
| MM12T | SSPO    | SCO-spondin homolog (Bos taurus)                                          | ENST00000378016 | chr7_149479281-149479281_G_T  | 598K>N  | Substitution | Nonsynonymous coding | 10% |
| MM12T | SSPO    | SCO-spondin homolog (Bos taurus)                                          | ENST00000378016 | chr7_149482682-149482682_C_T  | 1033P>L | Substitution | Nonsynonymous coding | 30% |
| MM12T | SSPO    | SCO-spondin homolog (Bos taurus)                                          | ENST00000378016 | chr7_149486412-149486412_G_A  | 1463R>H | Substitution | Nonsynonymous coding | 24% |
| MM12T | SSPO    | SCO-spondin homolog (Bos taurus)                                          | ENST00000378016 | chr7_149489009-149489009_C_T  | 1784R>C | Substitution | Nonsynonymous coding | 31% |
| MM12T | SSSCA1  | Sjogren syndrome/scleroderma autoantigen 1                                | CCDS8104.1      | chr11_65338915-65338915_G_A   | 104A>T  | Substitution | Nonsynonymous coding | 16% |
| MM12T | SSTR1   | somatostatin receptor 1                                                   | CCDS9666.1      | chr14_38678847-38678847_C_T   | 85R>C   | Substitution | Nonsynonymous coding | 13% |
| MM12T | SSTR2   | somatostatin receptor 2                                                   | CCDS11691.1     | chr17_71165931-71165931_C_T   | 158T>M  | Substitution | Nonsynonymous coding | 34% |
| MM12T | SSU72   | SSU72 RNA polymerase II CTD phosphatase homolog (S. cerevisiae)           | ENST00000378725 | chr1_1480140-1480140_G_A      | 156A>V  | Substitution | Nonsynonymous coding | 33% |
| MM12T | ST14    | suppression of tumorigenicity 14 (colon carcinoma)                        | CCDS8487.1      | chr11_130064600-130064600_C_A | 361P>T  | Substitution | Nonsynonymous coding | 24% |
| MM12T | ST18    | suppression of tumorigenicity 18 (breast carcinoma) (zinc finger protein) | CCDS6149.1      | chr8_53126764-53126764_C_A    | 18E>D   | Substitution | Nonsynonymous coding | 55% |
| MM12T | ST3GAL1 | ST3 beta-galactoside alpha-2,3-sialyltransferase 1                        | CCDS6373.1      | chr8_134478251-134478251_G_A  | 130P>L  | Substitution | Nonsynonymous coding | 30% |
| MM12T | ST3GAL1 | ST3 beta-galactoside alpha-2,3-sialyltransferase 1                        | CCDS6373.1      | chr8_134488066-134488066_G_A  | 68R>C   | Substitution | Nonsynonymous coding | 11% |
| MM12T | ST5     | suppression of tumorigenicity 5                                           | CCDS7791.1      | chr11_8734265-8734265_C_T     | 669V>I  | Substitution | Nonsynonymous coding | 23% |
| MM12T | ST5     | suppression of tumorigenicity 5                                           | CCDS7791.1      | chr11_8752500-8752500_C_T     | 113A>T  | Substitution | Nonsynonymous coding | 22% |
| MM12T | ST6GAL2 | ST6 beta-galactosamide alpha-2,6-sialyltransferase 2                      | CCDS2073.1      | chr2_107450522-107450522_G_A  | 342R>C  | Substitution | Nonsynonymous coding | 33% |

|       |         |                                                                                  |             |                               |         |              |                      |     |
|-------|---------|----------------------------------------------------------------------------------|-------------|-------------------------------|---------|--------------|----------------------|-----|
| MM12T | STAB1   | stabilin 1                                                                       | CCDS33768.1 | chr3_52543952-52543952_C_T    | 805T>M  | Substitution | Nonsynonymous coding | 28% |
| MM12T | STAB1   | stabilin 1                                                                       | CCDS33768.1 | chr3_52553967-52553967_G_A    | 1748G>D | Substitution | Nonsynonymous coding | 14% |
| MM12T | STAB1   | stabilin 1                                                                       | CCDS33768.1 | chr3_52554898-52554898_G_A    | 1929V>I | Substitution | Nonsynonymous coding | 10% |
| MM12T | STAB1   | stabilin 1                                                                       | CCDS33768.1 | chr3_52556610-52556610_G_A    | 2217G>D | Substitution | Nonsynonymous coding | 11% |
| MM12T | STAB2   | stabilin 2                                                                       | CCDS31888.1 | chr12_104125410-104125410_A_G | 1760I>M | Substitution | Nonsynonymous coding | 13% |
| MM12T | STAB2   | stabilin 2                                                                       | CCDS31888.1 | chr12_104140477-104140477_G_A | 2080C>Y | Substitution | Nonsynonymous coding | 16% |
| MM12T | STAB2   | stabilin 2                                                                       | CCDS31888.1 | chr12_104149237-104149237_G_T | 2291R>L | Substitution | Nonsynonymous coding | 26% |
| MM12T | STAC2   | SH3 and cysteine rich domain 2                                                   | CCDS11335.1 | chr17_37371055-37371055_G_A   | 278P>S  | Substitution | Nonsynonymous coding | 44% |
| MM12T | STAG2   | stromal antigen 2                                                                | CCDS43990.1 | chrX_123200109-123200109_G_T  | 727E>D  | Substitution | Nonsynonymous coding | 25% |
| MM12T | STAM2   | signal transducing adaptor molecule (SH3 domain and ITAM motif) 2                | CCDS2196.1  | chr2_152992050-152992050_T_C  | 258T>A  | Substitution | Nonsynonymous coding | 22% |
| MM12T | STARD10 | StAR-related lipid transfer (START) domain containing 10                         | CCDS41688.1 | chr11_72466018-72466018_G_A   | 267A>V  | Substitution | Nonsynonymous coding | 17% |
| MM12T | STARD10 | StAR-related lipid transfer (START) domain containing 10                         | CCDS41688.1 | chr11_72469649-72469649_C_T   | 129D>N  | Substitution | Nonsynonymous coding | 26% |
| MM12T | STARD13 | StAR-related lipid transfer (START) domain containing 13                         | CCDS9348.1  | chr13_33684173-33684173_G_A   | 962P>S  | Substitution | Nonsynonymous coding | 20% |
| MM12T | STARD13 | StAR-related lipid transfer (START) domain containing 13                         | CCDS9348.1  | chr13_33686985-33686985_G_A   | 789L>F  | Substitution | Nonsynonymous coding | 14% |
| MM12T | STARD3  | StAR-related lipid transfer (START) domain containing 3                          | CCDS11341.1 | chr17_37814233-37814233_C_T   | 128T>M  | Substitution | Nonsynonymous coding | 31% |
| MM12T | STARD8  | StAR-related lipid transfer (START) domain containing 8                          | CCDS48134.1 | chrX_67936250-67936250_G_A    | 92E>K   | Substitution | Nonsynonymous coding | 11% |
| MM12T | STARD9  | StAR-related lipid transfer (START) domain containing 9                          | NM_020759   | chr15_42875595-42875595__A    | NA      | Insertion    | Frameshift           | 31% |
| MM12T | STARD9  | StAR-related lipid transfer (START) domain containing 9                          | NM_020759   | chr15_42953423-42953423_G_T   | 257S>I  | Substitution | Nonsynonymous coding | 30% |
| MM12T | STAT1   | signal transducer and activator of transcription 1, 91kDa                        | CCDS2309.1  | chr2_191841592-191841592_C_T  | 678G>E  | Substitution | Nonsynonymous coding | 13% |
| MM12T | STAT3   | signal transducer and activator of transcription 3 (acute-phase response factor) | CCDS32656.1 | chr17_40497671-40497671_C_T   | 93R>K   | Substitution | Nonsynonymous coding | 20% |
| MM12T | STAT4   | signal transducer and activator of transcription 4                               | CCDS2310.1  | chr2_192011486-192011486_A_   | NA      | Deletion     | Splice site acceptor | 44% |
| MM12T | STAT5A  | signal transducer and activator of transcription 5A                              | CCDS11424.1 | chr17_40457713-40457713_C_T   | 489A>V  | Substitution | Nonsynonymous coding | 21% |
| MM12T | STAT6   | signal transducer and activator of transcription 6, interleukin-4 induced        | CCDS8931.1  | chr12_57501408-57501408_G_T   | 79Q>K   | Substitution | Nonsynonymous coding | 30% |
| MM12T | STBD1   | starch binding domain 1                                                          | CCDS3578.1  | chr4_77230510-77230510_G_A    | 145S>N  | Substitution | Nonsynonymous coding | 40% |
| MM12T | STIM2   | stromal interaction molecule 2                                                   | CCDS3440.1  | chr4_27024217-27024217_C_A    | 701L>I  | Substitution | Nonsynonymous coding | 13% |
| MM12T | STK10   | serine/threonine kinase 10                                                       | CCDS34290.1 | chr5_171583776-171583776_G_A  | 58T>M   | Substitution | Nonsynonymous coding | 12% |
| MM12T | STK17B  | serine/threonine kinase 17b                                                      | CCDS2315.1  | chr2_197021253-197021253_G_T  | 82A>D   | Substitution | Nonsynonymous coding | 37% |
| MM12T | STK24   | serine/threonine kinase 24                                                       | CCDS9488.1  | chr13_99112687-99112687_T_A   | 366D>V  | Substitution | Nonsynonymous coding | 13% |
| MM12T | STK25   | serine/threonine kinase 25                                                       | CCDS2549.1  | chr2_242440893-242440893_C_A  | 87K>N   | Substitution | Nonsynonymous coding | 35% |
| MM12T | STK32C  | serine/threonine kinase 32C                                                      | CCDS7666.1  | chr10_134036399-134036399_C_A | 362S>I  | Substitution | Nonsynonymous coding | 30% |
| MM12T | STK36   | serine/threonine kinase 36                                                       | CCDS2421.1  | chr2_219544363-219544363_G_A  | 287E>K  | Substitution | Nonsynonymous coding | 30% |
| MM12T | STK38L  | serine/threonine kinase 38 like                                                  | CCDS31761.1 | chr12_27470338-27470338_T_A   | 303L>M  | Substitution | Nonsynonymous coding | 26% |

|       |               |                                                                            |                 |                               |         |              |                      |     |
|-------|---------------|----------------------------------------------------------------------------|-----------------|-------------------------------|---------|--------------|----------------------|-----|
| MM12T | STK39         | serine threonine kinase 39                                                 | CCDS42770.1     | chr2_169038547-169038547_G_A  | 88R>C   | Substitution | Nonsynonymous coding | 26% |
| MM12T | STON1-GTF2A1L | STON1-GTF2A1L readthrough                                                  | CCDS1840.1      | chr2_48809434-48809434_G_T    | 554Q>H  | Substitution | Nonsynonymous coding | 25% |
| MM12T | STOX2         | storkhead box 2                                                            | CCDS47167.1     | chr4_184930617-184930617_C_T  | 209T>M  | Substitution | Nonsynonymous coding | 33% |
| MM12T | STRIP1        | striatin interacting protein 1                                             | CCDS30798.1     | chr1_110596347-110596347_A_G  | 776E>G  | Substitution | Nonsynonymous coding | 28% |
| MM12T | STRIP2        | striatin interacting protein 2                                             | CCDS34752.1     | chr7_129122741-129122741_C_T  | 703A>V  | Substitution | Nonsynonymous coding | 29% |
| MM12T | STX12         | syntaxin 12                                                                | ENST00000373939 | chr1_28138553-28138553_G_A    | 174S>N  | Substitution | Nonsynonymous coding | 25% |
| MM12T | STX19         | syntaxin 19                                                                | CCDS33793.1     | chr3_93734032-93734032_T_G    | 28T>P   | Substitution | Nonsynonymous coding | 35% |
| MM12T | STX1A         | syntaxin 1A (brain)                                                        | CCDS34655.1     | chr7_73118514-73118514_G_A    | 144R>C  | Substitution | Nonsynonymous coding | 41% |
| MM12T | STX1B         | syntaxin 1B                                                                | CCDS10699.1     | chr16_31012261-31012261_A_G   | 90S>P   | Substitution | Nonsynonymous coding | 30% |
| MM12T | STXBP2        | syntaxin binding protein 2                                                 | CCDS12181.1     | chr19_7703933-7703933_G_A     | 39R>H   | Substitution | Nonsynonymous coding | 11% |
| MM12T | STXBP5L       | syntaxin binding protein 5-like                                            | CCDS43137.1     | chr3_121132156-121132156_T_C  | 1058C>R | Substitution | Nonsynonymous coding | 29% |
| MM12T | SUDS3         | suppressor of defective silencing 3 homolog (S. cerevisiae)                | CCDS44993.1     | chr12_118829075-118829075_G_A | 169E>K  | Substitution | Nonsynonymous coding | 31% |
| MM12T | SULF2         | sulfatase 2                                                                | CCDS13408.1     | chr20_46331315-46331315_T_C   | 172Y>C  | Substitution | Nonsynonymous coding | 13% |
| MM12T | SULT2B1       | sulfotransferase family, cytosolic, 2B, member 1                           | CCDS12723.1     | chr19_49100018-49100018_G_A   | 223R>H  | Substitution | Nonsynonymous coding | 17% |
| MM12T | SUN2          | Sad1 and UNC84 domain containing 2                                         | ENST00000414211 | chr22_39134146-39134146_G_A   | 193A>V  | Substitution | Nonsynonymous coding | 39% |
| MM12T | SUN2          | Sad1 and UNC84 domain containing 2                                         | CCDS13978.1     | chr22_39147007-39147007_G_A   | 107T>M  | Substitution | Nonsynonymous coding | 13% |
| MM12T | SUOX          | sulfite oxidase                                                            | CCDS8901.2      | chr12_56398119-56398119_G_A   | 316V>I  | Substitution | Nonsynonymous coding | 33% |
| MM12T | SUPT20H       | suppressor of Ty 20 homolog (S. cerevisiae)                                | CCDS31959.1     | chr13_37618298-37618298_G_A   | 105P>S  | Substitution | Nonsynonymous coding | 13% |
| MM12T | SUPT5H        | suppressor of Ty 5 homolog (S. cerevisiae)                                 | CCDS12536.1     | chr19_39960816-39960816_G_A   | 478V>M  | Substitution | Nonsynonymous coding | 31% |
| MM12T | SUPT5H        | suppressor of Ty 5 homolog (S. cerevisiae)                                 | CCDS12536.1     | chr19_39964107-39964107_G_A   | 813R>H  | Substitution | Nonsynonymous coding | 13% |
| MM12T | SUPT5H        | suppressor of Ty 5 homolog (S. cerevisiae)                                 | CCDS12536.1     | chr19_39949652-39949652_C_T   | 133R>X  | Substitution | Nonsense             | 30% |
| MM12T | SUPV3L1       | suppressor of var1, 3-like 1 (S. cerevisiae)                               | CCDS7287.1      | chr10_70962635-70962635_G_A   | 538D>N  | Substitution | Nonsynonymous coding | 11% |
| MM12T | SUPV3L1       | suppressor of var1, 3-like 1 (S. cerevisiae)                               | CCDS7287.1      | chr10_70962756-70962756_C_A   | 578P>H  | Substitution | Nonsynonymous coding | 24% |
| MM12T | SURF4         | surfeit 4                                                                  | CCDS6968.1      | chr9_136231730-136231730_C_T  | 177A>T  | Substitution | Nonsynonymous coding | 30% |
| MM12T | SURF6         | surfeit 6                                                                  | CCDS6962.1      | chr9_136198895-136198895_C_T  | 299R>H  | Substitution | Nonsynonymous coding | 16% |
| MM12T | SUSD5         | sushi domain containing 5                                                  | CCDS46787.1     | chr3_33255429-33255429_C_T    | 94G>D   | Substitution | Nonsynonymous coding | 10% |
| MM12T | SV2B          | synaptic vesicle glycoprotein 2B                                           | CCDS10370.1     | chr15_91801710-91801710_G_A   | 282V>I  | Substitution | Nonsynonymous coding | 16% |
| MM12T | SVEP1         | sushi, von Willebrand factor type A, EGF and pentraxin domain containing 1 | CCDS48004.1     | chr9_113137728-113137728_G_A  | 3507P>L | Substitution | Nonsynonymous coding | 20% |
| MM12T | SVEP1         | sushi, von Willebrand factor type A, EGF and pentraxin domain containing 1 | CCDS48004.1     | chr9_113233719-113233719_C_T  | 975D>N  | Substitution | Nonsynonymous coding | 14% |
| MM12T | SVIL          | supervillin                                                                | CCDS7164.1      | chr10_29769523-29769523_G_A   | 1774Q>X | Substitution | Nonsense             | 32% |
| MM12T | SYDE1         | synapse defective 1, Rho GTPase, homolog 1 (C. elegans)                    | CCDS12324.1     | chr19_15223239-15223239_C_T   | 554A>V  | Substitution | Nonsynonymous coding | 25% |
| MM12T | SYN3          | synapsin III                                                               | CCDS13908.1     | chr22_32924931-32924931_T_C   | 387D>G  | Substitution | Nonsynonymous coding | 29% |

|       |          |                                                                                  |                 |                              |         |              |                      |     |
|-------|----------|----------------------------------------------------------------------------------|-----------------|------------------------------|---------|--------------|----------------------|-----|
| MM12T | SYNE1    | spectrin repeat containing, nuclear envelope 1                                   | CCDS5236.1      | chr6_152457805-152457805_G_A | 8536S>F | Substitution | Nonsynonymous coding | 10% |
| MM12T | SYNE1    | spectrin repeat containing, nuclear envelope 1                                   | CCDS5236.1      | chr6_152565728-152565728_G_A | 6546R>C | Substitution | Nonsynonymous coding | 51% |
| MM12T | SYNE1    | spectrin repeat containing, nuclear envelope 1                                   | CCDS5236.1      | chr6_152683324-152683324_G_A | 3427T>M | Substitution | Nonsynonymous coding | 30% |
| MM12T | SYNE2    | spectrin repeat containing, nuclear envelope 2                                   | CCDS9761.2      | chr14_64460647-64460647_C_A  | 914S>Y  | Substitution | Nonsynonymous coding | 18% |
| MM12T | SYNE3    | spectrin repeat containing, nuclear envelope family member 3                     | CCDS9935.1      | chr14_95934305-95934305_C_T  | ISV-1>  | Substitution | Splice site acceptor | 20% |
| MM12T | SYNGAP1  | synaptic Ras GTPase activating protein 1                                         | CCDS34434.2     | chr6_33406335-33406335_C_A   | 509A>D  | Substitution | Nonsynonymous coding | 13% |
| MM12T | SYNJ1    | synaptojanin 1                                                                   | CCDS33539.1     | chr21_34003439-34003439_A_C  | 1530F>V | Substitution | Nonsynonymous coding | 31% |
| MM12T | SYNJ1    | synaptojanin 1                                                                   | CCDS33539.1     | chr21_34012040-34012040_C_T  | 1213R>Q | Substitution | Nonsynonymous coding | 32% |
| MM12T | SYNJ2    | synaptojanin 2                                                                   | CCDS5254.1      | chr6_158492660-158492660_C_T | 656T>M  | Substitution | Nonsynonymous coding | 14% |
| MM12T | SYNM     | synemin, intermediate filament protein                                           | ENST00000336292 | chr15_99672977-99672977_C_T  | 1470A>V | Substitution | Nonsynonymous coding | 15% |
| MM12T | SYNPO    | synaptopodin                                                                     | CCDS4308.1      | chr5_150028555-150028555_G_A | 240A>T  | Substitution | Nonsynonymous coding | 32% |
| MM12T | SYT12    | synaptotagmin XII                                                                | CCDS8154.1      | chr11_66807630-66807630_C_T  | 193R>C  | Substitution | Nonsynonymous coding | 15% |
| MM12T | SYT14    | synaptotagmin XIV                                                                | CCDS31014.1     | chr1_210329100-210329100_C_T | 400S>L  | Substitution | Nonsynonymous coding | 20% |
| MM12T | SYTL2    | synaptotagmin-like 2                                                             | CCDS31651.1     | chr11_85409029-85409029_C_T  | 1154V>I | Substitution | Nonsynonymous coding | 38% |
| MM12T | SZT2     | seizure threshold 2 homolog (mouse)                                              | CCDS30694.1     | chr1_43903337-43903337_G_A   | 1222R>Q | Substitution | Nonsynonymous coding | 27% |
| MM12T | TAAR1    | trace amine associated receptor 1                                                | CCDS5158.1      | chr6_132966494-132966494_C_T | 217A>T  | Substitution | Nonsynonymous coding | 18% |
| MM12T | TAB1     | TGF-beta activated kinase 1/MAP3K7 binding protein 1                             | CCDS13993.1     | chr22_39822718-39822718_C_T  | 311A>V  | Substitution | Nonsynonymous coding | 26% |
| MM12T | TAB1     | TGF-beta activated kinase 1/MAP3K7 binding protein 1                             | CCDS13993.1     | chr22_39826067-39826067_G_A  | 452S>N  | Substitution | Nonsynonymous coding | 14% |
| MM12T | TAB3     | TGF-beta activated kinase 1/MAP3K7 binding protein 3                             | CCDS14226.1     | chrX_30872776-30872776_C_A   | 336G>X  | Substitution | Nonsense             | 34% |
| MM12T | TACC3    | transforming, acidic coiled-coil containing protein 3                            | CCDS3352.1      | chr4_1729620-1729620_C_A     | 164S>Y  | Substitution | Nonsynonymous coding | 11% |
| MM12T | TACR3    | tachykinin receptor 3                                                            | CCDS3664.1      | chr4_104640501-104640501_A_G | 111L>P  | Substitution | Nonsynonymous coding | 15% |
| MM12T | TADA2B   | transcriptional adaptor 2B                                                       | CCDS47007.1     | chr4_7056450-7056450_C_T     | 311A>V  | Substitution | Nonsynonymous coding | 31% |
| MM12T | TAF1     | TAF1 RNA polymerase II, TATA box binding protein (TBP)-associated factor, 250kDa | CCDS14412.1     | chrX_70597016-70597016__T    | NA      | Insertion    | Frameshift           | 15% |
| MM12T | TAF12    | TAF12 RNA polymerase II, TATA box binding protein (TBP)-associated factor, 20kDa | CCDS326.1       | chr1_28931969-28931969_C_T   | 122R>H  | Substitution | Nonsynonymous coding | 34% |
| MM12T | TAL1     | T-cell acute lymphocytic leukemia 1                                              | CCDS547.1       | chr1_47685444-47685444_C_T   | 315R>H  | Substitution | Nonsynonymous coding | 12% |
| MM12T | TAMM41   | TAM41, mitochondrial translocator assembly and maintenance protein, homolog (S.  | CCDS2607.1      | chr3_11885643-11885643_C_T   | 60A>T   | Substitution | Nonsynonymous coding | 14% |
| MM12T | TAPBP    | TAP binding protein (tapasin)                                                    | CCDS34426.1     | chr6_33272100-33272100_C_T   | 395S>N  | Substitution | Nonsynonymous coding | 24% |
| MM12T | TAS1R3   | taste receptor, type 1, member 3                                                 | CCDS30556.1     | chr1_1268403-1268403_G_A     | 460V>M  | Substitution | Nonsynonymous coding | 34% |
| MM12T | TAS1R3   | taste receptor, type 1, member 3                                                 | CCDS30556.1     | chr1_1269268-1269268_G_T     | 661E>D  | Substitution | Nonsynonymous coding | 28% |
| MM12T | TBC1D10B | TBC1 domain family, member 10B                                                   | CCDS10676.2     | chr16_30370531-30370531_G_A  | 535A>V  | Substitution | Nonsynonymous coding | 36% |
| MM12T | TBC1D2   | TBC1 domain family, member 2                                                     | CCDS35080.1     | chr9_100971286-100971286_C_T | 605R>H  | Substitution | Nonsynonymous coding | 33% |
| MM12T | TBC1D22B | TBC1 domain family, member 22B                                                   | CCDS4832.1      | chr6_37237402-37237402_C_A   | 30P>H   | Substitution | Nonsynonymous coding | 21% |

|       |          |                                                          |                 |                               |         |              |                      |     |
|-------|----------|----------------------------------------------------------|-----------------|-------------------------------|---------|--------------|----------------------|-----|
| MM12T | TBC1D30  | TBC1 domain family, member 30                            | ENST00000229088 | chr12_65225909-65225909_G_A   | 303R>H  | Substitution | Nonsynonymous coding | 36% |
| MM12T | TBC1D5   | TBC1 domain family, member 5                             | CCDS46770.1     | chr3_17300086-17300086_A_     | NA      | Deletion     | Splice site acceptor | 21% |
| MM12T | TBC1D7   | TBC1 domain family, member 7                             | CCDS4523.1      | chr6_13321234-13321234_C_T    | 96R>H   | Substitution | Nonsynonymous coding | 20% |
| MM12T | TBC1D8   | TBC1 domain family, member 8 (with GRAM domain)          | CCDS46375.1     | chr2_101670764-101670764_G_A  | 131A>V  | Substitution | Nonsynonymous coding | 26% |
| MM12T | TBC1D9B  | TBC1 domain family, member 9B (with GRAM domain)         | CCDS43408.1     | chr5_179306142-179306142_C_T  | 491R>H  | Substitution | Nonsynonymous coding | 28% |
| MM12T | TBCC     | tubulin folding cofactor C                               | CCDS4872.1      | chr6_42712880-42712880_C_T    | 311S>N  | Substitution | Nonsynonymous coding | 46% |
| MM12T | TBCD     | tubulin folding cofactor D                               | CCDS45818.1     | chr17_80899282-80899282_G_A   | 1163E>K | Substitution | Nonsynonymous coding | 11% |
| MM12T | TBK1     | TANK-binding kinase 1                                    | CCDS8968.1      | chr12_64849706-64849706_C_T   | 19A>V   | Substitution | Nonsynonymous coding | 21% |
| MM12T | TBKBP1   | TBK1 binding protein 1                                   | CCDS45722.1     | chr17_45776730-45776730_C_T   | 227R>W  | Substitution | Nonsynonymous coding | 36% |
| MM12T | TBL1X    | transducin (beta)-like 1X-linked                         | CCDS14133.1     | chrX_9622261-9622261_G_A      | 37G>D   | Substitution | Nonsynonymous coding | 29% |
| MM12T | TBL3     | transducin (beta)-like 3                                 | CCDS10453.1     | chr16_2024551-2024551_G_A     | 84A>T   | Substitution | Nonsynonymous coding | 10% |
| MM12T | TBL3     | transducin (beta)-like 3                                 | CCDS10453.1     | chr16_2024785-2024785_G_A     | 134R>H  | Substitution | Nonsynonymous coding | 10% |
| MM12T | TBL3     | transducin (beta)-like 3                                 | CCDS10453.1     | chr16_2024842-2024842_T_C     | 153V>A  | Substitution | Nonsynonymous coding | 33% |
| MM12T | TBL3     | transducin (beta)-like 3                                 | CCDS10453.1     | chr16_2028594-2028594_G_A     | 779A>T  | Substitution | Nonsynonymous coding | 10% |
| MM12T | TBPL2    | TATA box binding protein like 2                          | CCDS9724.1      | chr14_55903726-55903726_G_A   | 54A>V   | Substitution | Nonsynonymous coding | 19% |
| MM12T | TBRG4    | transforming growth factor beta regulator 4              | CCDS5501.1      | chr7_45148784-45148784_C_T    | 18R>H   | Substitution | Nonsynonymous coding | 27% |
| MM12T | TBX15    | T-box 15                                                 | CCDS30816.1     | chr1_119466078-119466078_G_A  | 175T>M  | Substitution | Nonsynonymous coding | 29% |
| MM12T | TBX15    | T-box 15                                                 | ENST00000369429 | chr1_119530322-119530322_G_A  | 33R>X   | Substitution | Nonsense             | 28% |
| MM12T | TBX2     | T-box 2                                                  | CCDS11627.2     | chr17_59480510-59480510_G_A   | 251R>H  | Substitution | Nonsynonymous coding | 14% |
| MM12T | TBX4     | T-box 4                                                  | CCDS11629.1     | chr17_59534959-59534959_C_T   | 83A>V   | Substitution | Nonsynonymous coding | 38% |
| MM12T | TBX4     | T-box 4                                                  | CCDS11629.1     | chr17_59556115-59556115_C_A   | 226S>Y  | Substitution | Nonsynonymous coding | 39% |
| MM12T | TBX6     | T-box 6                                                  | CCDS10670.1     | chr16_30100478-30100478_C_T   | 136R>H  | Substitution | Nonsynonymous coding | 10% |
| MM12T | TBXA2R   | thromboxane A2 receptor                                  | ENST00000397896 | chr19_3595643-3595643_A_G     | 229L>P  | Substitution | Nonsynonymous coding | 29% |
| MM12T | TBXAS1   | thromboxane A synthase 1 (platelet)                      | CCDS5855.1      | chr7_139529239-139529239_C_T  | 18T>M   | Substitution | Nonsynonymous coding | 13% |
| MM12T | TCF12    | transcription factor 12                                  | CCDS10160.1     | chr15_57574709-57574709_C_T   | 682S>L  | Substitution | Nonsynonymous coding | 14% |
| MM12T | TCF7L2   | transcription factor 7-like 2 (T-cell specific, HMG-box) | CCDS7576.1      | chr10_114925604-114925604_C_T | 555A>V  | Substitution | Nonsynonymous coding | 31% |
| MM12T | TCOF1    | Treacher Collins-Franceschetti syndrome 1                | CCDS47305.1     | chr5_149754950-149754950_G_T  | 513G>C  | Substitution | Nonsynonymous coding | 38% |
| MM12T | TCP10L2  | t-complex 10-like 2                                      | CCDS47514.1     | chr6_167591954-167591954_G_A  | 194R>H  | Substitution | Nonsynonymous coding | 21% |
| MM12T | TCP11    | t-complex 11, testis-specific                            | ENST00000455706 | chr6_35109157-35109157_C_     | NA      | Deletion     | Frameshift           | 20% |
| MM12T | TCTEX1D4 | Tctex1 domain containing 4                               | CCDS30699.1     | chr1_45271805-45271805_C_T    | 179R>H  | Substitution | Nonsynonymous coding | 31% |
| MM12T | TDRD1    | tudor domain containing 1                                | CCDS7588.1      | chr10_115947662-115947662_G_T | 24E>D   | Substitution | Nonsynonymous coding | 22% |
| MM12T | TDRD15   | tudor domain containing 15                               | ENST00000405799 | chr2_21364100-21364100_A_C    | 1254K>T | Substitution | Nonsynonymous coding | 13% |



|       |         |                                                                             |              |                               |         |              |                      |     |
|-------|---------|-----------------------------------------------------------------------------|--------------|-------------------------------|---------|--------------|----------------------|-----|
| MM12T | TDRD6   | tudor domain containing 6                                                   | CCDS34470.1  | chr6_46658172-46658172_A_T    | 769E>D  | Substitution | Nonsynonymous coding | 12% |
| MM12T | TECRL   | trans-2,3-enoyl-CoA reductase-like                                          | CCDS33990.1  | chr4_65180394-65180394_C_T    | 175A>T  | Substitution | Nonsynonymous coding | 41% |
| MM12T | TECTA   | tectorin alpha                                                              | CCDS8434.1   | chr11_120998985-120998985_C_T | 767R>W  | Substitution | Nonsynonymous coding | 10% |
| MM12T | TEK     | TEK tyrosine kinase, endothelial                                            | CCDS6519.1   | chr9_27190676-27190676_C_A    | 493Q>K  | Substitution | Nonsynonymous coding | 10% |
| MM12T | TELO2   | TEL2, telomere maintenance 2, homolog (S. cerevisiae)                       | CCDS32363.1  | chr16_1557610-1557610_G_A     | 767R>H  | Substitution | Nonsynonymous coding | 40% |
| MM12T | TENM1   | teneurin transmembrane protein 1                                            | CCDS14609.1  | chrX_123870848-123870848__A   | NA      | Insertion    | Frameshift           | 12% |
| MM12T | TENM1   | teneurin transmembrane protein 1                                            | CCDS14609.1  | chrX_123657290-123657290_G_T  | 986P>H  | Substitution | Nonsynonymous coding | 29% |
| MM12T | TENM1   | teneurin transmembrane protein 1                                            | CCDS14609.1  | chrX_124097529-124097529_C_A  | 25S>I   | Substitution | Nonsynonymous coding | 13% |
| MM12T | TENM2   | teneurin transmembrane protein 2                                            | NM_001122679 | chr5_167675119-167675119_C_T  | 2383T>M | Substitution | Nonsynonymous coding | 38% |
| MM12T | TENM3   | teneurin transmembrane protein 3                                            | CCDS47165.1  | chr4_183245223-183245223_G_A  | 17R>Q   | Substitution | Nonsynonymous coding | 31% |
| MM12T | TENM3   | teneurin transmembrane protein 3                                            | CCDS47165.1  | chr4_183658160-183658160_C_T  | 1056A>V | Substitution | Nonsynonymous coding | 14% |
| MM12T | TENM3   | teneurin transmembrane protein 3                                            | CCDS47165.1  | chr4_183659641-183659641_C_T  | 1108A>V | Substitution | Nonsynonymous coding | 12% |
| MM12T | TENM4   | teneurin transmembrane protein 4                                            | CCDS44688.1  | chr11_78440528-78440528_C_T   | 1100R>H | Substitution | Nonsynonymous coding | 19% |
| MM12T | TENM4   | teneurin transmembrane protein 4                                            | CCDS44688.1  | chr11_78369498-78369498_G_A   | 2639R>X | Substitution | Nonsense             | 31% |
| MM12T | TEP1    | telomerase-associated protein 1                                             | CCDS9548.1   | chr14_20842589-20842589_A_G   | 2157V>A | Substitution | Nonsynonymous coding | 15% |
| MM12T | TEP1    | telomerase-associated protein 1                                             | CCDS9548.1   | chr14_20848577-20848577_C_T   | 1607R>H | Substitution | Nonsynonymous coding | 30% |
| MM12T | TEP1    | telomerase-associated protein 1                                             | CCDS9548.1   | chr14_20852291-20852291_C_T   | 1147R>H | Substitution | Nonsynonymous coding | 19% |
| MM12T | TEP1    | telomerase-associated protein 1                                             | CCDS9548.1   | chr14_20856115-20856115_C_T   | 878R>Q  | Substitution | Nonsynonymous coding | 17% |
| MM12T | TEPP    | testis, prostate and placenta expressed                                     | CCDS10790.1  | chr16_58010391-58010391_G_A   | 6A>T    | Substitution | Nonsynonymous coding | 13% |
| MM12T | TES     | testis derived transcript (3 LIM domains)                                   | CCDS5763.1   | chr7_115874609-115874609_G_T  | 17G>X   | Substitution | Nonsense             | 33% |
| MM12T | TESK1   | testis-specific kinase 1                                                    | CCDS6580.1   | chr9_35609489-35609489_C_T    | 544A>V  | Substitution | Nonsynonymous coding | 10% |
| MM12T | TET1    | tet methylcytosine dioxygenase 1                                            | CCDS7281.1   | chr10_70426928-70426928_G_A   | 1530A>T | Substitution | Nonsynonymous coding | 24% |
| MM12T | TET2    | tet methylcytosine dioxygenase 2                                            | CCDS47120.1  | chr4_106196631-106196631_C_T  | 1655P>L | Substitution | Nonsynonymous coding | 24% |
| MM12T | TET2    | tet methylcytosine dioxygenase 2                                            | CCDS47120.1  | chr4_106197590-106197590_A_G  | 1975T>A | Substitution | Nonsynonymous coding | 26% |
| MM12T | TET3    | tet methylcytosine dioxygenase 3                                            | CCDS46339.1  | chr2_74273531-74273531_G_A    | 28A>T   | Substitution | Nonsynonymous coding | 11% |
| MM12T | TET3    | tet methylcytosine dioxygenase 3                                            | CCDS46339.1  | chr2_74317140-74317140_G_A    | 867R>H  | Substitution | Nonsynonymous coding | 12% |
| MM12T | TEX2    | testis expressed 2 [Source:HGNC Symbol;Acc:30884]                           | CCDS11658.1  | chr17_62290700-62290700_C_T   | 293R>H  | Substitution | Nonsynonymous coding | 21% |
| MM12T | TEX33   | testis expressed 33                                                         | CCDS13937.1  | chr22_37397927-37397927_C_T   | 62R>H   | Substitution | Nonsynonymous coding | 11% |
| MM12T | TF      | transferrin                                                                 | CCDS3080.1   | chr3_133486900-133486900_C_A  | 505P>H  | Substitution | Nonsynonymous coding | 24% |
| MM12T | TFAP2B  | transcription factor AP-2 beta (activating enhancer binding protein 2 beta) | CCDS4934.2   | chr6_50791372-50791372_C_T    | 112Q>X  | Substitution | Nonsense             | 50% |
| MM12T | TFCP2L1 | transcription factor CP2-like 1                                             | CCDS2134.1   | chr2_122038771-122038771_G_T  | 47L>M   | Substitution | Nonsynonymous coding | 37% |
| MM12T | TFE3    | transcription factor binding to IGHM enhancer 3                             | CCDS14315.3  | chrX_48887952-48887952_C_     | NA      | Deletion     | Frameshift           | 23% |

|       |        |                                                                                 |                 |                              |         |              |                      |     |
|-------|--------|---------------------------------------------------------------------------------|-----------------|------------------------------|---------|--------------|----------------------|-----|
| MM12T | TFEB   | transcription factor EB                                                         | CCDS4858.1      | chr6_41652348-41652348_C_T   | 474D>N  | Substitution | Nonsynonymous coding | 19% |
| MM12T | TFIP11 | tuftelin interacting protein 11                                                 | CCDS13838.1     | chr22_26895194-26895194_C_T  | 402R>H  | Substitution | Nonsynonymous coding | 11% |
| MM12T | TFR2   | transferrin receptor 2                                                          | CCDS34707.1     | chr7_100225731-100225731_G_A | 501A>V  | Substitution | Nonsynonymous coding | 30% |
| MM12T | TG     | thyroglobulin                                                                   | CCDS34944.1     | chr8_133923730-133923730_C_T | 1371R>W | Substitution | Nonsynonymous coding | 34% |
| MM12T | TGDS   | TDP-glucose 4,6-dehydratase                                                     | CCDS9471.1      | chr13_95235475-95235475_C_T  | 110R>H  | Substitution | Nonsynonymous coding | 15% |
| MM12T | TGFB1  | transforming growth factor, beta 1                                              | CCDS33031.1     | chr19_41847939-41847939_C_A  | ISV-4>  | Substitution | Splice site acceptor | 29% |
| MM12T | TGFB2  | transforming growth factor, beta 2                                              | CCDS44318.1     | chr1_218520232-218520232_C_  | NA      | Deletion     | Frameshift           | 10% |
| MM12T | TGFBI  | transforming growth factor, beta-induced, 68kDa                                 | CCDS47266.1     | chr5_135382096-135382096_G_A | 124R>H  | Substitution | Nonsynonymous coding | 11% |
| MM12T | TGM2   | transglutaminase 2 (C polypeptide, protein-glutamine-gamma-glutamyltransferase) | CCDS13302.1     | chr20_36767988-36767988_C_T  | 390A>T  | Substitution | Nonsynonymous coding | 12% |
| MM12T | TGM3   | transglutaminase 3 (E polypeptide, protein-glutamine-gamma-glutamyltransferase) | CCDS33435.1     | chr20_2312855-2312855_C_T    | 514T>I  | Substitution | Nonsynonymous coding | 34% |
| MM12T | TH     | tyrosine hydroxylase                                                            | CCDS7731.1      | chr11_2186997-2186997_C_T    | ISV-4>  | Substitution | Splice site acceptor | 24% |
| MM12T | THAP10 | THAP domain containing 10                                                       | CCDS10237.1     | chr15_71175115-71175115_G_A  | 188R>C  | Substitution | Nonsynonymous coding | 21% |
| MM12T | THAP7  | THAP domain containing 7                                                        | CCDS13787.1     | chr22_21354312-21354312_G_A  | 263R>W  | Substitution | Nonsynonymous coding | 31% |
| MM12T | THBD   | thrombomodulin                                                                  | CCDS13148.1     | chr20_23028541-23028541_G_A  | 534A>V  | Substitution | Nonsynonymous coding | 38% |
| MM12T | THBS2  | thrombospondin 2                                                                | CCDS34574.1     | chr6_169621619-169621619_G_A | 1093R>X | Substitution | Nonsense             | 47% |
| MM12T | THEM5  | thioesterase superfamily member 5                                               | CCDS1005.1      | chr1_151820264-151820264_G_T | 217S>Y  | Substitution | Nonsynonymous coding | 31% |
| MM12T | THG1L  | tRNA-histidine guanylyltransferase 1-like (S. cerevisiae)                       | CCDS4341.1      | chr5_157160007-157160007_G_T | 108S>I  | Substitution | Nonsynonymous coding | 25% |
| MM12T | THNSL2 | threonine synthase-like 2 (S. cerevisiae)                                       | CCDS2002.2      | chr2_88474908-88474908_C_T   | 187H>Y  | Substitution | Nonsynonymous coding | 11% |
| MM12T | THOC2  | THO complex 2                                                                   | CCDS43988.1     | chrX_122801051-122801051_C_T | 366D>N  | Substitution | Nonsynonymous coding | 24% |
| MM12T | THOC2  | THO complex 2                                                                   | CCDS43988.1     | chrX_122866845-122866845_C_T | 10A>T   | Substitution | Nonsynonymous coding | 28% |
| MM12T | THOC5  | THO complex 5                                                                   | CCDS13859.1     | chr22_29913299-29913299_C_T  | 516V>I  | Substitution | Nonsynonymous coding | 11% |
| MM12T | THOC6  | THO complex 6 homolog (Drosophila)                                              | CCDS10491.1     | chr16_3077037-3077037_G_A    | 221R>H  | Substitution | Nonsynonymous coding | 14% |
| MM12T | THOC6  | THO complex 6 homolog (Drosophila)                                              | CCDS10491.1     | chr16_3077247-3077247_C_T    | 259A>V  | Substitution | Nonsynonymous coding | 29% |
| MM12T | THOC6  | THO complex 6 homolog (Drosophila)                                              | CCDS10491.1     | chr16_3077487-3077487_G_A    | 311A>T  | Substitution | Nonsynonymous coding | 32% |
| MM12T | THOP1  | thimet oligopeptidase 1                                                         | CCDS12095.1     | chr19_2807449-2807449_C_T    | 299A>V  | Substitution | Nonsynonymous coding | 27% |
| MM12T | THRAP3 | thyroid hormone receptor associated protein 3                                   | CCDS405.1       | chr1_36748232-36748232_G_A   | 23R>H   | Substitution | Nonsynonymous coding | 32% |
| MM12T | THRB   | thyroid hormone receptor, beta                                                  | CCDS2641.1      | chr3_24231784-24231784_C_T   | 22D>N   | Substitution | Nonsynonymous coding | 26% |
| MM12T | THRSP  | thyroid hormone responsive                                                      | CCDS8256.1      | chr11_77774946-77774946_C_T  | 7R>C    | Substitution | Nonsynonymous coding | 30% |
| MM12T | THSD1  | thrombospondin, type I, domain containing 1                                     | CCDS9432.1      | chr13_52951856-52951856_C_T  | 750G>E  | Substitution | Nonsynonymous coding | 31% |
| MM12T | THSD7B | thrombospondin, type I, domain containing 7B                                    | ENST00000272643 | chr2_137928475-137928475_C_T | 564R>C  | Substitution | Nonsynonymous coding | 10% |
| MM12T | THSD7B | thrombospondin, type I, domain containing 7B                                    | ENST00000272643 | chr2_138030202-138030202_G_A | 789C>Y  | Substitution | Nonsynonymous coding | 21% |
| MM12T | THSD7B | thrombospondin, type I, domain containing 7B                                    | ENST00000272643 | chr2_138163309-138163309_C_A | 876A>D  | Substitution | Nonsynonymous coding | 40% |

|       |         |                                                                  |                 |                              |         |              |                      |     |
|-------|---------|------------------------------------------------------------------|-----------------|------------------------------|---------|--------------|----------------------|-----|
| MM12T | THUMP1  | THUMP domain containing 1                                        | CCDS10588.1     | chr16_20748527-20748527_G_T  | 246A>D  | Substitution | Nonsynonymous coding | 26% |
| MM12T | TIA1    | TIA1 cytotoxic granule-associated RNA binding protein            | CCDS1901.1      | chr2_70439858-70439858_G_C   | 385T>S  | Substitution | Nonsynonymous coding | 30% |
| MM12T | TIA1    | TIA1 cytotoxic granule-associated RNA binding protein            | CCDS1901.1      | chr2_70442548-70442548_G_T   | 281C>X  | Substitution | Nonsense             | 25% |
| MM12T | TIAM1   | T-cell lymphoma invasion and metastasis 1                        | CCDS13609.1     | chr21_32526578-32526578_C_T  | 1053R>H | Substitution | Nonsynonymous coding | 18% |
| MM12T | TIAM2   | T-cell lymphoma invasion and metastasis 2                        | CCDS34558.1     | chr6_155465779-155465779_C_T | 557S>F  | Substitution | Nonsynonymous coding | 17% |
| MM12T | TICAM1  | toll-like receptor adaptor molecule 1                            | CCDS12136.1     | chr19_4817289-4817289__AGG   | NA      | Insertion    | In-frame insertion   | 22% |
| MM12T | TICAM1  | toll-like receptor adaptor molecule 1                            | CCDS12136.1     | chr19_4817666-4817666_G_A    | 242P>S  | Substitution | Nonsynonymous coding | 26% |
| MM12T | TICRR   | TOPBP1-interacting checkpoint and replication regulator          | CCDS10352.2     | chr15_90129009-90129009_C_A  | 416A>D  | Substitution | Nonsynonymous coding | 30% |
| MM12T | TICRR   | TOPBP1-interacting checkpoint and replication regulator          | CCDS10352.2     | chr15_90144763-90144763_C_T  | 764A>V  | Substitution | Nonsynonymous coding | 35% |
| MM12T | TIMM17B | translocase of inner mitochondrial membrane 17 homolog B (yeast) | CCDS14308.1     | chrX_48751095-48751095_G_A   | 146P>S  | Substitution | Nonsynonymous coding | 31% |
| MM12T | TIMM17B | translocase of inner mitochondrial membrane 17 homolog B (yeast) | CCDS14308.1     | chrX_48751189-48751189_G_A   | 142R>X  | Substitution | Nonsense             | 28% |
| MM12T | TIMM9   | translocase of inner mitochondrial membrane 9 homolog (yeast)    | CCDS9735.1      | chr14_58875834-58875834_A_G  | 63I>T   | Substitution | Nonsynonymous coding | 19% |
| MM12T | TIMP4   | TIMP metalloproteinase inhibitor 4                               | CCDS2608.1      | chr3_12195877-12195877_C_T   | 143V>M  | Substitution | Nonsynonymous coding | 25% |
| MM12T | TINAG   | tubulointerstitial nephritis antigen                             | CCDS4955.1      | chr6_54219311-54219311_C_T   | 376A>V  | Substitution | Nonsynonymous coding | 26% |
| MM12T | TJP3    | tight junction protein 3                                         | CCDS32873.1     | chr19_3748054-3748054_G_A    | 895R>K  | Substitution | Nonsynonymous coding | 17% |
| MM12T | TKT     | transketolase                                                    | CCDS2871.1      | chr3_53267282-53267282_G_A   | 213A>V  | Substitution | Nonsynonymous coding | 11% |
| MM12T | TLE2    | transducin-like enhancer of split 2 (E(sp1) homolog, Drosophila) | CCDS45911.1     | chr19_3006492-3006492_C_T    | 476G>S  | Substitution | Nonsynonymous coding | 47% |
| MM12T | TLE2    | transducin-like enhancer of split 2 (E(sp1) homolog, Drosophila) | CCDS45911.1     | chr19_3013746-3013746_C_T    | 265R>H  | Substitution | Nonsynonymous coding | 31% |
| MM12T | TLE2    | transducin-like enhancer of split 2 (E(sp1) homolog, Drosophila) | CCDS45911.1     | chr19_3015709-3015709_C_T    | 207S>N  | Substitution | Nonsynonymous coding | 31% |
| MM12T | TLE2    | transducin-like enhancer of split 2 (E(sp1) homolog, Drosophila) | CCDS45911.1     | chr19_3019308-3019308_C_T    | 175A>T  | Substitution | Nonsynonymous coding | 35% |
| MM12T | TLE6    | transducin-like enhancer of split 6 (E(sp1) homolog, Drosophila) | CCDS45910.1     | chr19_2989725-2989725_G_A    | 396A>T  | Substitution | Nonsynonymous coding | 26% |
| MM12T | TLE6    | transducin-like enhancer of split 6 (E(sp1) homolog, Drosophila) | CCDS45910.1     | chr19_2994070-2994070_C_T    | 531P>S  | Substitution | Nonsynonymous coding | 35% |
| MM12T | TLK1    | tousled-like kinase 1                                            | ENST00000360843 | chr2_171916481-171916481_G_A | 141P>L  | Substitution | Nonsynonymous coding | 20% |
| MM12T | TLL1    | tolloid-like 1                                                   | CCDS3811.1      | chr4_166963254-166963254_G_A | 446S>N  | Substitution | Nonsynonymous coding | 21% |
| MM12T | TLL1    | tolloid-like 1                                                   | CCDS3811.1      | chr4_166986977-166986977_C_T | 717T>I  | Substitution | Nonsynonymous coding | 14% |
| MM12T | TLL2    | tolloid-like 2                                                   | CCDS7449.1      | chr10_98188479-98188479_C_T  | 183A>T  | Substitution | Nonsynonymous coding | 33% |
| MM12T | TLN1    | talin 1                                                          | CCDS35009.1     | chr9_35697907-35697907_C_T   | 2503A>T | Substitution | Nonsynonymous coding | 32% |
| MM12T | TLN1    | talin 1                                                          | CCDS35009.1     | chr9_35707831-35707831_C_T   | 1510R>H | Substitution | Nonsynonymous coding | 29% |
| MM12T | TLN1    | talin 1                                                          | CCDS35009.1     | chr9_35707882-35707882_G_A   | 1493S>F | Substitution | Nonsynonymous coding | 11% |
| MM12T | TLN1    | talin 1                                                          | CCDS35009.1     | chr9_35720837-35720837_G_A   | 393A>V  | Substitution | Nonsynonymous coding | 19% |
| MM12T | TLN1    | talin 1                                                          | CCDS35009.1     | chr9_35724015-35724015_G_T   | 239A>D  | Substitution | Nonsynonymous coding | 27% |
| MM12T | TLN2    | talin 2                                                          | CCDS32261.1     | chr15_63004167-63004167_C_T  | 842A>V  | Substitution | Nonsynonymous coding | 30% |

|       |          |                                                                        |             |                               |         |              |                      |     |
|-------|----------|------------------------------------------------------------------------|-------------|-------------------------------|---------|--------------|----------------------|-----|
| MM12T | TLN2     | taln 2                                                                 | CCDS32261.1 | chr15_63032895-63032895_C_A   | 1318L>M | Substitution | Nonsynonymous coding | 38% |
| MM12T | TLR1     | toll-like receptor 1                                                   | CCDS33973.1 | chr4_38798270-38798270_A_G    | 728L>P  | Substitution | Nonsynonymous coding | 39% |
| MM12T | TLR2     | toll-like receptor 2                                                   | CCDS3784.1  | chr4_154624296-154624296_G_T  | 79Q>H   | Substitution | Nonsynonymous coding | 23% |
| MM12T | TLR5     | toll-like receptor 5                                                   | CCDS31033.1 | chr1_223285767-223285767_G_T  | 203L>I  | Substitution | Nonsynonymous coding | 27% |
| MM12T | TLR8     | toll-like receptor 8                                                   | CCDS14152.1 | chrX_12938673-12938673_C_A    | 505P>H  | Substitution | Nonsynonymous coding | 29% |
| MM12T | TLR8     | toll-like receptor 8                                                   | CCDS14152.1 | chrX_12938717-12938717_G_A    | 520V>M  | Substitution | Nonsynonymous coding | 27% |
| MM12T | TLR8     | toll-like receptor 8                                                   | CCDS14152.1 | chrX_12939408-12939408_C_T    | 750T>I  | Substitution | Nonsynonymous coding | 28% |
| MM12T | TLR9     | toll-like receptor 9                                                   | CCDS2848.1  | chr3_52256539-52256539_G_A    | 598T>M  | Substitution | Nonsynonymous coding | 19% |
| MM12T | TLR9     | toll-like receptor 9                                                   | CCDS2848.1  | chr3_52257970-52257970_G_A    | 121A>V  | Substitution | Nonsynonymous coding | 31% |
| MM12T | TLX2     | T-cell leukemia homeobox 2                                             | CCDS1947.1  | chr2_74742187-74742187_C_T    | 85A>V   | Substitution | Nonsynonymous coding | 14% |
| MM12T | TM2D3    | TM2 domain containing 3                                                | CCDS10393.1 | chr15_102182798-102182798_G_A | 210R>W  | Substitution | Nonsynonymous coding | 19% |
| MM12T | TM9SF1   | transmembrane 9 superfamily member 1                                   | CCDS9617.1  | chr14_24661548-24661548_C_T   | 328A>T  | Substitution | Nonsynonymous coding | 31% |
| MM12T | TM9SF2   | transmembrane 9 superfamily member 2                                   | CCDS9493.1  | chr13_100211648-100211648_C_T | 595T>M  | Substitution | Nonsynonymous coding | 30% |
| MM12T | TM9SF3   | transmembrane 9 superfamily member 3                                   | CCDS7450.1  | chr10_98311104-98311104_C_A   | 286S>I  | Substitution | Nonsynonymous coding | 34% |
| MM12T | TMC2     | transmembrane channel-like 2                                           | CCDS13029.2 | chr20_2539135-2539135_G_A     | 39R>Q   | Substitution | Nonsynonymous coding | 34% |
| MM12T | TMC2     | transmembrane channel-like 2                                           | CCDS13029.2 | chr20_2542613-2542613_C_T     | 171R>W  | Substitution | Nonsynonymous coding | 29% |
| MM12T | TMC2     | transmembrane channel-like 2                                           | CCDS13029.2 | chr20_2592875-2592875_G_T     | 544W>C  | Substitution | Nonsynonymous coding | 29% |
| MM12T | TMC4     | transmembrane channel-like 4                                           | CCDS46174.1 | chr19_54669235-54669235_C_T   | 294R>Q  | Substitution | Nonsynonymous coding | 27% |
| MM12T | TMC5     | transmembrane channel-like 5                                           | CCDS45431.1 | chr16_19492774-19492774_C_T   | 784Q>X  | Substitution | Nonsense             | 13% |
| MM12T | TMC6     | transmembrane channel-like 6                                           | CCDS32748.1 | chr17_76122692-76122692_C_T   | 32D>N   | Substitution | Nonsynonymous coding | 11% |
| MM12T | TMC6     | transmembrane channel-like 6                                           | CCDS32748.1 | chr17_76113589-76113589_C_A   | 720E>X  | Substitution | Nonsense             | 11% |
| MM12T | TMC6     | transmembrane channel-like 6                                           | CCDS32748.1 | chr17_76113617-76113617_C_T   | 710W>X  | Substitution | Nonsense             | 36% |
| MM12T | TMCO3    | transmembrane and coiled-coil domains 3                                | CCDS9537.1  | chr13_114193756-114193756_G_A | 542E>K  | Substitution | Nonsynonymous coding | 14% |
| MM12T | TMED1    | transmembrane emp24 protein transport domain containing 1              | CCDS12249.1 | chr19_10945630-10945630_C_T   | 149V>I  | Substitution | Nonsynonymous coding | 30% |
| MM12T | TMED6    | transmembrane emp24 protein transport domain containing 6              | CCDS10878.1 | chr16_69377539-69377539_C_T   | 165G>D  | Substitution | Nonsynonymous coding | 13% |
| MM12T | TMEFF2   | transmembrane protein with EGF-like and two follistatin-like domains 2 | CCDS2314.1  | chr2_192863795-192863795_G_A  | 226R>X  | Substitution | Nonsense             | 13% |
| MM12T | TMEM129  | transmembrane protein 129                                              | CCDS46998.1 | chr4_1719346-1719346_C_A      | 246R>M  | Substitution | Nonsynonymous coding | 43% |
| MM12T | TMEM132A | transmembrane protein 132A                                             | CCDS7997.1  | chr11_60702054-60702054_G_A   | 553A>T  | Substitution | Nonsynonymous coding | 23% |
| MM12T | TMEM132B | transmembrane protein 132B                                             | CCDS41859.1 | chr12_125834486-125834486_G_A | 181G>R  | Substitution | Nonsynonymous coding | 30% |
| MM12T | TMEM132E | transmembrane protein 132E                                             | CCDS11283.1 | chr17_32964613-32964613_G_A   | 773V>I  | Substitution | Nonsynonymous coding | 51% |
| MM12T | TMEM14C  | transmembrane protein 14C                                              | CCDS4514.1  | chr6_10728953-10728953_G_T    | 94G>C   | Substitution | Nonsynonymous coding | 30% |
| MM12T | TMEM163  | transmembrane protein 163                                              | CCDS2172.1  | chr2_135260483-135260483_G_A  | 182L>F  | Substitution | Nonsynonymous coding | 11% |

|       |          |                            |                 |                               |        |              |                      |     |
|-------|----------|----------------------------|-----------------|-------------------------------|--------|--------------|----------------------|-----|
| MM12T | TMEM168  | transmembrane protein 168  | CCDS5757.1      | chr7_112407412-112407412_C_T  | 645R>H | Substitution | Nonsynonymous coding | 33% |
| MM12T | TMEM171  | transmembrane protein 171  | CCDS4017.1      | chr5_72419385-72419385_C_T    | 62A>V  | Substitution | Nonsynonymous coding | 30% |
| MM12T | TMEM180  | transmembrane protein 180  | CCDS7535.1      | chr10_104235565-104235565_G_A | 460A>T | Substitution | Nonsynonymous coding | 10% |
| MM12T | TMEM181  | transmembrane protein 181  | CCDS43520.1     | chr6_159029368-159029368_C_T  | 363P>L | Substitution | Nonsynonymous coding | 20% |
| MM12T | TMEM181  | transmembrane protein 181  | CCDS43520.1     | chr6_159046206-159046206_C_T  | 479A>V | Substitution | Nonsynonymous coding | 10% |
| MM12T | TMEM184B | transmembrane protein 184B | CCDS13969.2     | chr22_38641959-38641959_C_T   | 114V>I | Substitution | Nonsynonymous coding | 62% |
| MM12T | TMEM186  | transmembrane protein 186  | CCDS10535.1     | chr16_8891468-8891468_C_T     | ISV+1> | Substitution | Splice site donor    | 11% |
| MM12T | TMEM198  | transmembrane protein 198  | CCDS33385.1     | chr2_220412657-220412657_G_A  | 199R>H | Substitution | Nonsynonymous coding | 11% |
| MM12T | TMEM199  | transmembrane protein 199  | CCDS11228.1     | chr17_26687869-26687869_C_T   | 177S>L | Substitution | Nonsynonymous coding | 39% |
| MM12T | TMEM2    | transmembrane protein 2    | CCDS6638.1      | chr9_74324305-74324305_T_C    | 952D>G | Substitution | Nonsynonymous coding | 26% |
| MM12T | TMEM2    | transmembrane protein 2    | CCDS6638.1      | chr9_74345102-74345102_C_A    | 614R>M | Substitution | Nonsynonymous coding | 26% |
| MM12T | TMEM2    | transmembrane protein 2    | CCDS6638.1      | chr9_74361153-74361153_C_T    | 146D>N | Substitution | Nonsynonymous coding | 23% |
| MM12T | TMEM209  | transmembrane protein 209  | CCDS47712.1     | chr7_129815360-129815360_C_T  | 446D>N | Substitution | Nonsynonymous coding | 16% |
| MM12T | TMEM229A | transmembrane protein 229A | CCDS47694.1     | chr7_123672061-123672061_C_T  | 333A>T | Substitution | Nonsynonymous coding | 26% |
| MM12T | TMEM229B | transmembrane protein 229B | CCDS9783.1      | chr14_67940219-67940219_C_T   | 141R>H | Substitution | Nonsynonymous coding | 22% |
| MM12T | TMEM231  | transmembrane protein 231  | CCDS45531.1     | chr16_75579818-75579818_G_A   | 144T>M | Substitution | Nonsynonymous coding | 33% |
| MM12T | TMEM232  | transmembrane protein 232  | CCDS47253.1     | chr5_109960993-109960993_C_A  | 248R>I | Substitution | Nonsynonymous coding | 23% |
| MM12T | TMEM232  | transmembrane protein 232  | CCDS47253.1     | chr5_109904327-109904327_C_A  | ISV-1> | Substitution | Splice site acceptor | 26% |
| MM12T | TMEM237  | transmembrane protein 237  | ENST00000409099 | chr2_202496944-202496944_C_T  | 133R>H | Substitution | Nonsynonymous coding | 29% |
| MM12T | TMEM239  | transmembrane protein 239  | NM_001167670    | chr20_2797534-2797534_C_T     | 112L>F | Substitution | Nonsynonymous coding | 33% |
| MM12T | TMEM240  | transmembrane protein 240  | ENST00000378733 | chr1_1470664-1470664_G_A      | 197R>W | Substitution | Nonsynonymous coding | 13% |
| MM12T | TMEM240  | transmembrane protein 240  | CCDS44040.1     | chr1_1470807-1470807_C_T      | 152A>T | Substitution | Nonsynonymous coding | 10% |
| MM12T | TMEM240  | transmembrane protein 240  | CCDS44040.1     | chr1_1470975-1470975_G_A      | 123R>C | Substitution | Nonsynonymous coding | 33% |
| MM12T | TMEM245  | transmembrane protein 245  | CCDS43858.1     | chr9_111800351-111800351_A_G  | 724Y>H | Substitution | Nonsynonymous coding | 31% |
| MM12T | TMEM245  | transmembrane protein 245  | CCDS43858.1     | chr9_111853198-111853198_C_T  | ISV+4> | Substitution | Splice site donor    | 23% |
| MM12T | TMEM247  | transmembrane protein 247  | ENST00000343465 | chr2_46707890-46707890_C_T    | 155A>V | Substitution | Nonsynonymous coding | 36% |
| MM12T | TMEM30A  | transmembrane protein 30A  | CCDS4983.1      | chr6_75970575-75970575_G_A    | 169A>V | Substitution | Nonsynonymous coding | 18% |
| MM12T | TMEM44   | transmembrane protein 44   | CCDS3308.1      | chr3_194337922-194337922_G_A  | 230S>L | Substitution | Nonsynonymous coding | 31% |
| MM12T | TMEM44   | transmembrane protein 44   | CCDS3308.1      | chr3_194344327-194344327_C_T  | 152W>X | Substitution | Nonsense             | 25% |
| MM12T | TMEM47   | transmembrane protein 47   | CCDS14235.1     | chrX_34675088-34675088_T_G    | 20K>T  | Substitution | Nonsynonymous coding | 27% |
| MM12T | TMEM63A  | transmembrane protein 63A  | CCDS31042.1     | chr1_226037619-226037619_G_A  | 689R>C | Substitution | Nonsynonymous coding | 15% |
| MM12T | TMEM63A  | transmembrane protein 63A  | CCDS31042.1     | chr1_226053660-226053660_C_T  | 228R>Q | Substitution | Nonsynonymous coding | 36% |

|       |           |                                                                   |             |                               |         |              |                      |     |
|-------|-----------|-------------------------------------------------------------------|-------------|-------------------------------|---------|--------------|----------------------|-----|
| MM12T | TMEM63C   | transmembrane protein 63C                                         | CCDS45141.1 | chr14_77698065-77698065_C_T   | 162S>F  | Substitution | Nonsynonymous coding | 29% |
| MM12T | TMEM68    | transmembrane protein 68                                          | CCDS6161.1  | chr8_56652717-56652717_T_C    | 250S>G  | Substitution | Nonsynonymous coding | 33% |
| MM12T | TMEM79    | transmembrane protein 79                                          | CCDS1138.1  | chr1_156255277-156255277_C_T  | 87P>L   | Substitution | Nonsynonymous coding | 11% |
| MM12T | TMEM9     | transmembrane protein 9                                           | CCDS1408.1  | chr1_201120981-201120981_C_A  | ISV-1>  | Substitution | Splice site acceptor | 24% |
| MM12T | TMEM95    | transmembrane protein 95                                          | CCDS32546.1 | chr17_7259169-7259169_C_A     | 80A>D   | Substitution | Nonsynonymous coding | 13% |
| MM12T | TMEM99    | transmembrane protein 99                                          | CCDS42319.1 | chr17_38991037-38991037_G_A   | 90R>Q   | Substitution | Nonsynonymous coding | 10% |
| MM12T | TMOD1     | tropomodulin 1                                                    | CCDS6726.1  | chr9_100328232-100328232_G_A  | 241A>T  | Substitution | Nonsynonymous coding | 28% |
| MM12T | TMPO      | thymopoietin                                                      | CCDS9064.1  | chr12_98927863-98927863_C_T   | 610R>C  | Substitution | Nonsynonymous coding | 21% |
| MM12T | TMPRSS11D | transmembrane protease, serine 11D                                | CCDS3518.1  | chr4_68693168-68693168_C_A    | 255V>L  | Substitution | Nonsynonymous coding | 18% |
| MM12T | TMPRSS11E | transmembrane protease, serine 11E                                | CCDS33993.1 | chr4_69343236-69343236_C_A    | 286P>H  | Substitution | Nonsynonymous coding | 29% |
| MM12T | TMPRSS11F | transmembrane protease, serine 11F                                | CCDS3520.1  | chr4_68930513-68930513_C_T    | 302G>E  | Substitution | Nonsynonymous coding | 13% |
| MM12T | TMPRSS11F | transmembrane protease, serine 11F                                | CCDS3520.1  | chr4_68925163-68925163_G_A    | 347Q>X  | Substitution | Nonsense             | 31% |
| MM12T | TMPRSS12  | transmembrane (C-terminal) protease, serine 12                    | CCDS44881.1 | chr12_51237705-51237705_C_T   | 90P>S   | Substitution | Nonsynonymous coding | 10% |
| MM12T | TMPRSS13  | transmembrane protease, serine 13                                 | CCDS41721.1 | chr11_117780668-117780668_G_A | 321A>V  | Substitution | Nonsynonymous coding | 19% |
| MM12T | TMPRSS9   | transmembrane protease, serine 9                                  | CCDS12088.1 | chr19_2424155-2424155_C_T     | 839P>S  | Substitution | Nonsynonymous coding | 32% |
| MM12T | TMPRSS9   | transmembrane protease, serine 9                                  | CCDS12088.1 | chr19_2425415-2425415_G_A     | 981R>H  | Substitution | Nonsynonymous coding | 10% |
| MM12T | TMTC4     | transmembrane and tetratricopeptide repeat containing 4           | CCDS9497.2  | chr13_101289850-101289850_G_A | 314P>L  | Substitution | Nonsynonymous coding | 30% |
| MM12T | TMX2      | thioredoxin-related transmembrane protein 2                       | CCDS7967.1  | chr11_57505132-57505132_G_A   | 81R>H   | Substitution | Nonsynonymous coding | 28% |
| MM12T | TNFAIP2   | tumor necrosis factor, alpha-induced protein 2                    | CCDS9979.1  | chr14_103592871-103592871_C_T | 26A>V   | Substitution | Nonsynonymous coding | 34% |
| MM12T | TNFRSF11B | tumor necrosis factor receptor superfamily, member 11b            | CCDS6326.1  | chr8_119936834-119936834_G_A  | 329L>F  | Substitution | Nonsynonymous coding | 27% |
| MM12T | TNFRSF11B | tumor necrosis factor receptor superfamily, member 11b            | CCDS6326.1  | chr8_119941144-119941144_C_T  | 142C>Y  | Substitution | Nonsynonymous coding | 43% |
| MM12T | TNFRSF1B  | tumor necrosis factor receptor superfamily, member 1B             | CCDS145.1   | chr1_12252978-12252978_T_C    | 204S>P  | Substitution | Nonsynonymous coding | 33% |
| MM12T | TNFRSF1B  | tumor necrosis factor receptor superfamily, member 1B             | CCDS145.1   | chr1_12253156-12253156_G_A    | ISV+1>  | Substitution | Splice site donor    | 14% |
| MM12T | TNFRSF21  | tumor necrosis factor receptor superfamily, member 21             | CCDS4921.1  | chr6_47221120-47221120_C_T    | 461A>T  | Substitution | Nonsynonymous coding | 11% |
| MM12T | TNFRSF21  | tumor necrosis factor receptor superfamily, member 21             | CCDS4921.1  | chr6_47252003-47252003_T_C    | 305H>R  | Substitution | Nonsynonymous coding | 27% |
| MM12T | TNFRSF8   | tumor necrosis factor receptor superfamily, member 8              | CCDS144.1   | chr1_12183425-12183425_C_T    | 344A>V  | Substitution | Nonsynonymous coding | 28% |
| MM12T | TNKS      | tankyrase, TRF1-interacting ankyrin-related ADP-ribose polymerase | CCDS5974.1  | chr8_9623793-9623793_C_T      | 1200R>X | Substitution | Nonsense             | 14% |
| MM12T | TNKS1BP1  | tankyrase 1 binding protein 1, 182kDa                             | CCDS7951.1  | chr11_57069677-57069677_C_T   | 1569A>T | Substitution | Nonsynonymous coding | 23% |
| MM12T | TNMD      | tenomodulin                                                       | CCDS14469.1 | chrX_99854571-99854571_C_T    | 271R>X  | Substitution | Nonsense             | 22% |
| MM12T | TNPO1     | transportin 1                                                     | CCDS43329.1 | chr5_72168492-72168492_A_G    | 208Q>R  | Substitution | Nonsynonymous coding | 33% |
| MM12T | TNPO2     | transportin 2                                                     | CCDS45991.1 | chr19_12822202-12822202_G_A   | 342T>M  | Substitution | Nonsynonymous coding | 26% |
| MM12T | TNR       | tenascin R                                                        | CCDS1318.1  | chr1_175328798-175328798_G_A  | 975A>V  | Substitution | Nonsynonymous coding | 36% |

|       |          |                                                                          |                 |                               |         |              |                      |     |
|-------|----------|--------------------------------------------------------------------------|-----------------|-------------------------------|---------|--------------|----------------------|-----|
| MM12T | TNRC18   | trinucleotide repeat containing 18                                       | CCDS47534.1     | chr7_5385222-5385222_C_T      | 1897R>Q | Substitution | Nonsynonymous coding | 10% |
| MM12T | TNRC18   | trinucleotide repeat containing 18                                       | CCDS47534.1     | chr7_5413872-5413872_C_T      | 1015V>M | Substitution | Nonsynonymous coding | 40% |
| MM12T | TNRC6A   | trinucleotide repeat containing 6A                                       | CCDS10624.2     | chr16_24788620-24788620_C_A   | 177A>D  | Substitution | Nonsynonymous coding | 12% |
| MM12T | TNRC6A   | trinucleotide repeat containing 6A                                       | CCDS10624.2     | chr16_24830006-24830006_G_A   | 1689A>T | Substitution | Nonsynonymous coding | 17% |
| MM12T | TNRC6B   | trinucleotide repeat containing 6B                                       | CCDS46713.1     | chr22_40696519-40696519_G_A   | 1147V>M | Substitution | Nonsynonymous coding | 35% |
| MM12T | TNRC6C   | trinucleotide repeat containing 6C                                       | CCDS45799.1     | chr17_76045499-76045499_C_T   | 119A>V  | Substitution | Nonsynonymous coding | 35% |
| MM12T | TNS1     | tensin 1                                                                 | CCDS2407.1      | chr2_218674664-218674664_G_A  | 1615P>S | Substitution | Nonsynonymous coding | 23% |
| MM12T | TNS1     | tensin 1                                                                 | CCDS2407.1      | chr2_218747113-218747113_C_T  | 298G>D  | Substitution | Nonsynonymous coding | 32% |
| MM12T | TNS3     | tensin 3                                                                 | CCDS5506.2      | chr7_47474969-47474969_G_A    | 79P>S   | Substitution | Nonsynonymous coding | 29% |
| MM12T | TOB1     | transducer of ERBB2, 1                                                   | CCDS11576.1     | chr17_48941234-48941234_G_A   | 49P>S   | Substitution | Nonsynonymous coding | 14% |
| MM12T | TOB2     | transducer of ERBB2, 2                                                   | CCDS14015.1     | chr22_41833183-41833183_C_T   | 56R>H   | Substitution | Nonsynonymous coding | 38% |
| MM12T | TOMM40L  | translocase of outer mitochondrial membrane 40 homolog (yeast)-like      | CCDS1227.1      | chr1_161197728-161197728_G_A  | 145D>N  | Substitution | Nonsynonymous coding | 25% |
| MM12T | TOMM70A  | translocase of outer mitochondrial membrane 70 homolog A (S. cerevisiae) | CCDS33807.1     | chr3_100119643-100119643_G_T  | 51L>M   | Substitution | Nonsynonymous coding | 33% |
| MM12T | TOP2B    | topoisomerase (DNA) II beta 180kDa                                       | CCDS46776.1     | chr3_25668727-25668727_C_T    | 651R>H  | Substitution | Nonsynonymous coding | 19% |
| MM12T | TOPAZ1   | testis and ovary specific PAZ domain containing 1                        | CCDS46809.1     | chr3_44285883-44285883_A_     | NA      | Deletion     | Frameshift           | 33% |
| MM12T | TOPBP1   | topoisomerase (DNA) II binding protein 1                                 | CCDS46919.1     | chr3_133376731-133376731_G_A  | 92R>X   | Substitution | Nonsense             | 31% |
| MM12T | TOR1AIP1 | torsin A interacting protein 1                                           | CCDS1335.1      | chr1_179883139-179883139_G_A  | 305S>N  | Substitution | Nonsynonymous coding | 11% |
| MM12T | TOR1AIP2 | torsin A interacting protein 2                                           | CCDS1334.1      | chr1_179815464-179815464_C_A  | 385E>D  | Substitution | Nonsynonymous coding | 32% |
| MM12T | TP53     | tumor protein p53                                                        | CCDS11118.1     | chr17_7577538-7577538_C_T     | 248R>Q  | Substitution | Nonsynonymous coding | 31% |
| MM12T | TP53     | tumor protein p53                                                        | CCDS11118.1     | chr17_7574003-7574003_G_A     | 342R>X  | Substitution | Nonsense             | 35% |
| MM12T | TP53INP1 | tumor protein p53 inducible nuclear protein 1                            | CCDS6265.1      | chr8_95952091-95952091_G_A    | 157P>L  | Substitution | Nonsynonymous coding | 31% |
| MM12T | TP73     | tumor protein p73                                                        | CCDS49.1        | chr1_3649575-3649575_G_A      | 615D>N  | Substitution | Nonsynonymous coding | 14% |
| MM12T | TP73     | tumor protein p73                                                        | CCDS49.1        | chr1_3645894-3645894_C_T      | 360R>X  | Substitution | Nonsense             | 11% |
| MM12T | TPO      | thyroid peroxidase                                                       | CCDS1643.1      | chr2_1481101-1481101_C_T      | 355R>C  | Substitution | Nonsynonymous coding | 31% |
| MM12T | TPO      | thyroid peroxidase                                                       | CCDS1643.1      | chr2_1488494-1488494_G_A      | 489A>T  | Substitution | Nonsynonymous coding | 27% |
| MM12T | TPO      | thyroid peroxidase                                                       | CCDS1643.1      | chr2_1546214-1546214_C_T      | 924R>W  | Substitution | Nonsynonymous coding | 11% |
| MM12T | TPP1     | tripeptidyl peptidase I                                                  | ENST00000428886 | chr11_6638494-6638494_C_A     | 182Q>H  | Substitution | Nonsynonymous coding | 32% |
| MM12T | TPP2     | tripeptidyl peptidase II                                                 | CCDS9502.1      | chr13_103289452-103289452_C_T | 567L>F  | Substitution | Nonsynonymous coding | 13% |
| MM12T | TPST2    | tyrosylprotein sulfotransferase 2                                        | CCDS13839.1     | chr22_26937295-26937295_C_T   | 101R>H  | Substitution | Nonsynonymous coding | 46% |
| MM12T | TRAC     | T cell receptor alpha constant                                           | ENST00000431063 | chr14_22957623-22957623_G_A   | 19S>N   | Substitution | Nonsynonymous coding | 19% |
| MM12T | TRAF1    | TNF receptor-associated factor 1                                         | CCDS6825.1      | chr9_123675896-123675896_T_C  | 139M>V  | Substitution | Nonsynonymous coding | 32% |
| MM12T | TRAF2    | TNF receptor-associated factor 2                                         | CCDS7013.1      | chr9_139815644-139815644_G_A  | 372R>H  | Substitution | Nonsynonymous coding | 35% |

|       |          |                                                       |                 |                               |         |              |                      |     |
|-------|----------|-------------------------------------------------------|-----------------|-------------------------------|---------|--------------|----------------------|-----|
| MM12T | TRAF4    | TNF receptor-associated factor 4                      | CCDS11243.1     | chr17_27076269-27076269_C_A   | 363L>I  | Substitution | Nonsynonymous coding | 14% |
| MM12T | TRAF5    | TNF receptor-associated factor 5                      | CCDS1497.1      | chr1_211538773-211538773_G_A  | 251R>H  | Substitution | Nonsynonymous coding | 28% |
| MM12T | TRAPPC10 | trafficking protein particle complex 10               | CCDS13704.1     | chr21_45499447-45499447_G_T   | 491R>M  | Substitution | Nonsynonymous coding | 19% |
| MM12T | TRAPPC10 | trafficking protein particle complex 10               | CCDS13704.1     | chr21_45499956-45499956_G_T   | 557K>N  | Substitution | Nonsynonymous coding | 13% |
| MM12T | TRAPPC12 | trafficking protein particle complex 12               | CCDS1652.1      | chr2_3483047-3483047_C_T      | 675R>W  | Substitution | Nonsynonymous coding | 29% |
| MM12T | TRAPPC12 | trafficking protein particle complex 12               | ENST00000304601 | chr2_3464015-3464015_G_T      | ISV-1>  | Substitution | Splice site acceptor | 32% |
| MM12T | TRAPPC2  | trafficking protein particle complex 2                | CCDS48082.1     | chrX_13734658-13734658_G_A    | 78A>V   | Substitution | Nonsynonymous coding | 29% |
| MM12T | TRAPPC8  | trafficking protein particle complex 8                | CCDS11901.1     | chr18_29450445-29450445_C_T   | 760A>T  | Substitution | Nonsynonymous coding | 15% |
| MM12T | TRAPPC9  | trafficking protein particle complex 9                | CCDS34946.1     | chr8_140743441-140743441_C_T  | 1202G>R | Substitution | Nonsynonymous coding | 35% |
| MM12T | TRAPPC9  | trafficking protein particle complex 9                | CCDS34946.1     | chr8_141285904-141285904_G_A  | 809Q>X  | Substitution | Nonsense             | 67% |
| MM12T | TRBV30   | T cell receptor beta variable 30<br>(gene/pseudogene) | ENST00000417977 | chr7_142510300-142510300_G_T  | 102D>E  | Substitution | Nonsynonymous coding | 13% |
| MM12T | TRBV4-1  | T cell receptor beta variable 4-1                     | ENST00000390357 | chr7_142013329-142013329_C_T  | 62P>S   | Substitution | Nonsynonymous coding | 40% |
| MM12T | TRBV9    | T cell receptor beta variable 9                       | ENST00000390363 | chr7_142239712-142239712_C_A  | 56Q>H   | Substitution | Nonsynonymous coding | 38% |
| MM12T | TREX1    | three prime repair exonuclease 1                      | CCDS43086.1     | chr3_48508395-48508395_G_A    | 169R>H  | Substitution | Nonsynonymous coding | 11% |
| MM12T | TREX2    | three prime repair exonuclease 2                      | CCDS35437.1     | chrX_152710741-152710741_C_T  | 50A>T   | Substitution | Nonsynonymous coding | 11% |
| MM12T | TRHDE    | thyrotropin-releasing hormone degrading<br>enzyme     | CCDS9004.1      | chr12_72666763-72666763_G_A   | 69G>R   | Substitution | Nonsynonymous coding | 14% |
| MM12T | TRIM10   | tripartite motif containing 10                        | CCDS34375.1     | chr6_30128329-30128329_C_T    | 103G>R  | Substitution | Nonsynonymous coding | 11% |
| MM12T | TRIM28   | tripartite motif containing 28                        | CCDS12985.1     | chr19_59059163-59059163_C_T   | 282R>C  | Substitution | Nonsynonymous coding | 34% |
| MM12T | TRIM29   | tripartite motif containing 29                        | CCDS8428.1      | chr11_120007939-120007939_C_A | 267K>N  | Substitution | Nonsynonymous coding | 31% |
| MM12T | TRIM3    | tripartite motif containing 3                         | CCDS7764.1      | chr11_6472230-6472230_G_A     | 588H>Y  | Substitution | Nonsynonymous coding | 22% |
| MM12T | TRIM3    | tripartite motif containing 3                         | CCDS7764.1      | chr11_6486922-6486922_C_T     | 2A>T    | Substitution | Nonsynonymous coding | 47% |
| MM12T | TRIM32   | tripartite motif containing 32                        | CCDS6817.1      | chr9_119460035-119460035_C_T  | 5A>V    | Substitution | Nonsynonymous coding | 33% |
| MM12T | TRIM32   | tripartite motif containing 32                        | CCDS6817.1      | chr9_119460302-119460302_C_T  | 94A>V   | Substitution | Nonsynonymous coding | 14% |
| MM12T | TRIM33   | tripartite motif containing 33                        | CCDS872.1       | chr1_114967347-114967347_G_A  | 576Q>X  | Substitution | Nonsense             | 53% |
| MM12T | TRIM35   | tripartite motif containing 35                        | CCDS6056.2      | chr8_27145186-27145186_C_T    | 455A>T  | Substitution | Nonsynonymous coding | 12% |
| MM12T | TRIM4    | tripartite motif containing 4                         | CCDS5679.1      | chr7_99490304-99490304_C_T    | 329V>M  | Substitution | Nonsynonymous coding | 25% |
| MM12T | TRIM4    | tripartite motif containing 4                         | CCDS5679.1      | chr7_99500850-99500850_G_A    | 304R>X  | Substitution | Nonsense             | 16% |
| MM12T | TRIM42   | tripartite motif containing 42                        | CCDS3113.1      | chr3_140397235-140397235_G_A  | 55C>Y   | Substitution | Nonsynonymous coding | 12% |
| MM12T | TRIM47   | tripartite motif containing 47                        | CCDS32737.1     | chr17_73872824-73872824_G_A   | 249S>F  | Substitution | Nonsynonymous coding | 35% |
| MM12T | TRIM54   | tripartite motif containing 54                        | CCDS1745.2      | chr2_27529128-27529128_G_A    | 347G>D  | Substitution | Nonsynonymous coding | 15% |
| MM12T | TRIM56   | tripartite motif containing 56                        | CCDS43625.1     | chr7_100732377-100732377_C_T  | 595A>V  | Substitution | Nonsynonymous coding | 34% |
| MM12T | TRIM59   | tripartite motif containing 59                        | CCDS3190.1      | chr3_160156368-160156368_T_   | NA      | Deletion     | Frameshift           | 15% |



|       |         |                                                                    |                 |                               |         |              |                      |     |
|-------|---------|--------------------------------------------------------------------|-----------------|-------------------------------|---------|--------------|----------------------|-----|
| MM12T | TRIM77  | tripartite motif containing 77                                     | ENST00000398290 | chr11_89447496-89447496_G_T   | 216S>I  | Substitution | Nonsynonymous coding | 15% |
| MM12T | TRIM8   | tripartite motif containing 8                                      | CCDS31274.1     | chr10_104414867-104414867_C_T | 233R>W  | Substitution | Nonsynonymous coding | 32% |
| MM12T | TRIM9   | tripartite motif containing 9                                      | CCDS9703.1      | chr14_51561375-51561375_A_G   | 95S>P   | Substitution | Nonsynonymous coding | 27% |
| MM12T | TRIML1  | tripartite motif family-like 1                                     | CCDS3851.1      | chr4_189063589-189063589_G_A  | 230A>T  | Substitution | Nonsynonymous coding | 36% |
| MM12T | TRIML1  | tripartite motif family-like 1                                     | CCDS3851.1      | chr4_189068441-189068441_T_G  | 441L>R  | Substitution | Nonsynonymous coding | 26% |
| MM12T | TRIO    | trio Rho guanine nucleotide exchange factor                        | CCDS3883.1      | chr5_14304635-14304635_G_T    | 478Q>H  | Substitution | Nonsynonymous coding | 28% |
| MM12T | TRIO    | trio Rho guanine nucleotide exchange factor                        | CCDS3883.1      | chr5_14405964-14405964_G_T    | 1575S>I | Substitution | Nonsynonymous coding | 30% |
| MM12T | TRIO    | trio Rho guanine nucleotide exchange factor                        | CCDS3883.1      | chr5_14488001-14488001_G_A    | 2422A>T | Substitution | Nonsynonymous coding | 13% |
| MM12T | TRIOBP  | TRIO and F-actin binding protein                                   | CCDS43015.1     | chr22_38097475-38097475_G_A   | 35A>T   | Substitution | Nonsynonymous coding | 49% |
| MM12T | TRIOBP  | TRIO and F-actin binding protein                                   | CCDS43015.1     | chr22_38121084-38121084_C_T   | 841R>X  | Substitution | Nonsense             | 36% |
| MM12T | TRIOBP  | TRIO and F-actin binding protein                                   | CCDS43015.1     | chr22_38161773-38161773_C_T   | 2141Q>X | Substitution | Nonsense             | 15% |
| MM12T | TRIP10  | thyroid hormone receptor interactor 10                             | CCDS12172.1     | chr19_6750420-6750420_G_A     | 449A>T  | Substitution | Nonsynonymous coding | 26% |
| MM12T | TRIP11  | thyroid hormone receptor interactor 11                             | CCDS9899.1      | chr14_92436069-92436069_G_A   | 1963A>V | Substitution | Nonsynonymous coding | 35% |
| MM12T | TRIP12  | thyroid hormone receptor interactor 12                             | CCDS33391.1     | chr2_230632378-230632378_C_T  | 1957M>I | Substitution | Nonsynonymous coding | 17% |
| MM12T | TRIP12  | thyroid hormone receptor interactor 12                             | CCDS33391.1     | chr2_230655840-230655840_C_T  | 1440D>N | Substitution | Nonsynonymous coding | 39% |
| MM12T | TRMT10A | tRNA methyltransferase 10 homolog A (S. cerevisiae)                | CCDS3650.1      | chr4_100480433-100480433_T_C  | 21I>M   | Substitution | Nonsynonymous coding | 12% |
| MM12T | TRMT2A  | tRNA methyltransferase 2 homolog A (S. cerevisiae)                 | CCDS13774.1     | chr22_20100985-20100985_C_T   | 468E>K  | Substitution | Nonsynonymous coding | 17% |
| MM12T | TRMT5   | tRNA methyltransferase 5 homolog (S. cerevisiae)                   | CCDS32092.1     | chr14_61444318-61444318_C_T   | 236A>T  | Substitution | Nonsynonymous coding | 23% |
| MM12T | TRMT61B | tRNA methyltransferase 61 homolog B (S. cerevisiae)                | CCDS1768.1      | chr2_29074130-29074130_G_A    | 374R>C  | Substitution | Nonsynonymous coding | 12% |
| MM12T | TROAP   | trophinin associated protein                                       | CCDS8784.1      | chr12_49725008-49725008_C_A   | 704L>M  | Substitution | Nonsynonymous coding | 27% |
| MM12T | TROAP   | trophinin associated protein                                       | CCDS8784.1      | chr12_49719406-49719406_C_T   | 154R>X  | Substitution | Nonsense             | 15% |
| MM12T | TRPC5   | transient receptor potential cation channel, subfamily C, member 5 | CCDS14561.1     | chrX_111097007-111097007_A_G  | 410W>R  | Substitution | Nonsynonymous coding | 50% |
| MM12T | TRPC5   | transient receptor potential cation channel, subfamily C, member 5 | CCDS14561.1     | chrX_111097254-111097254_C_T  | 327W>X  | Substitution | Nonsense             | 12% |
| MM12T | TRPC6   | transient receptor potential cation channel, subfamily C, member 6 | CCDS8311.1      | chr11_101375261-101375261_C_A | 147E>X  | Substitution | Nonsense             | 16% |
| MM12T | TRPM3   | transient receptor potential cation channel, subfamily M, member 3 | CCDS43835.1     | chr9_73152199-73152199_G_A    | 1265T>M | Substitution | Nonsynonymous coding | 35% |
| MM12T | TRPM4   | transient receptor potential cation channel, subfamily M, member 4 | CCDS33073.1     | chr19_49685952-49685952_G_A   | 461A>T  | Substitution | Nonsynonymous coding | 20% |
| MM12T | TRPM5   | transient receptor potential cation channel, subfamily M, member 5 | CCDS31340.1     | chr11_2443404-2443404_G_A     | 89R>C   | Substitution | Nonsynonymous coding | 28% |
| MM12T | TRPM6   | transient receptor potential cation channel, subfamily M, member 6 | CCDS6647.1      | chr9_77343217-77343217_G_A    | 1958A>V | Substitution | Nonsynonymous coding | 16% |
| MM12T | TRPM8   | transient receptor potential cation channel, subfamily M, member 8 | CCDS33407.1     | chr2_234891793-234891793_T_C  | 896W>R  | Substitution | Nonsynonymous coding | 28% |
| MM12T | TRPS1   | trichorhinophalangeal syndrome I                                   | CCDS6318.2      | chr8_116430586-116430586_G_A  | 932A>V  | Substitution | Nonsynonymous coding | 11% |
| MM12T | TRPV1   | transient receptor potential cation channel, subfamily V, member 1 | CCDS45576.1     | chr17_3475494-3475494_C_T     | 718R>K  | Substitution | Nonsynonymous coding | 12% |
| MM12T | TRPV1   | transient receptor potential cation channel, subfamily V, member 1 | CCDS45576.1     | chr17_3494600-3494600_C_A     | 111R>M  | Substitution | Nonsynonymous coding | 34% |

|       |          |                                                                    |                 |                                |         |              |                      |     |
|-------|----------|--------------------------------------------------------------------|-----------------|--------------------------------|---------|--------------|----------------------|-----|
| MM12T | TRPV2    | transient receptor potential cation channel, subfamily V, member 2 | CCDS32576.1     | chr17_16326863-16326863_G_A    | 236A>T  | Substitution | Nonsynonymous coding | 25% |
| MM12T | TRPV3    | transient receptor potential cation channel, subfamily V, member 3 | CCDS11029.1     | chr17_3436061-3436061_G_A      | 319R>C  | Substitution | Nonsynonymous coding | 15% |
| MM12T | TRPV6    | transient receptor potential cation channel, subfamily V, member 6 | CCDS5874.1      | chr7_142569522-142569522_C_A   | 706D>Y  | Substitution | Nonsynonymous coding | 32% |
| MM12T | TRRAP    | transformation/transcription domain-associated protein             | CCDS5659.1      | chr7_98524917-98524917_C_T     | 1035R>W | Substitution | Nonsynonymous coding | 34% |
| MM12T | TRRAP    | transformation/transcription domain-associated protein             | CCDS5659.1      | chr7_98527702-98527702_C_A     | 1089P>H | Substitution | Nonsynonymous coding | 31% |
| MM12T | TRRAP    | transformation/transcription domain-associated protein             | CCDS5659.1      | chr7_98562327-98562327_G_A     | 2277R>H | Substitution | Nonsynonymous coding | 13% |
| MM12T | TRRAP    | transformation/transcription domain-associated protein             | CCDS5659.1      | chr7_98592334-98592334_C_T     | 3348T>M | Substitution | Nonsynonymous coding | 28% |
| MM12T | TRRAP    | transformation/transcription domain-associated protein             | CCDS5659.1      | chr7_98606086-98606086_C_T     | 3571R>C | Substitution | Nonsynonymous coding | 34% |
| MM12T | TRUB2    | TruB pseudouridine (psi) synthase homolog 2 (E. coli)              | CCDS6897.1      | chr9_131072055-131072055_C_T   | 257R>H  | Substitution | Nonsynonymous coding | 13% |
| MM12T | TRUB2    | TruB pseudouridine (psi) synthase homolog 2 (E. coli)              | CCDS6897.1      | chr9_131083905-131083905_C_T   | 72V>I   | Substitution | Nonsynonymous coding | 35% |
| MM12T | TSC1     | tuberous sclerosis 1                                               | CCDS6956.1      | chr9_135773001-135773004_AAAA_ | NA      | Deletion     | Splice site acceptor | 14% |
| MM12T | TSC2     | tuberous sclerosis 2                                               | CCDS10458.1     | chr16_2126544-2126544_G_A      | 932S>N  | Substitution | Nonsynonymous coding | 26% |
| MM12T | TSC22D1  | TSC22 domain family, member 1                                      | CCDS31966.1     | chr13_45008790-45008790_G_A    | 1065A>V | Substitution | Nonsynonymous coding | 15% |
| MM12T | TSC22D2  | TSC22 domain family, member 2                                      | CCDS3149.1      | chr3_150127556-150127556_C_T   | 140A>V  | Substitution | Nonsynonymous coding | 28% |
| MM12T | TSEN54   | tRNA splicing endonuclease 54 homolog (S. cerevisiae)              | CCDS11724.1     | chr17_73513243-73513243_G_A    | 96G>D   | Substitution | Nonsynonymous coding | 43% |
| MM12T | TSGA10   | testis specific, 10                                                | CCDS2037.1      | chr2_99688246-99688246_C_T     | 344A>T  | Substitution | Nonsynonymous coding | 24% |
| MM12T | TSGA10IP | testis specific, 10 interacting protein                            | NM_152762       | chr11_65726388-65726388_G_A    | 453A>T  | Substitution | Nonsynonymous coding | 30% |
| MM12T | TSHR     | thyroid stimulating hormone receptor                               | CCDS9872.1      | chr14_81610021-81610021_C_T    | 540A>V  | Substitution | Nonsynonymous coding | 32% |
| MM12T | TSNARE1  | t-SNARE domain containing 1                                        | CCDS6384.1      | chr8_143365807-143365807_C_T   | 444A>T  | Substitution | Nonsynonymous coding | 28% |
| MM12T | TSPAN10  | tetraspanin 10                                                     | ENST00000328585 | chr17_79615197-79615197_G_A    | 314R>Q  | Substitution | Nonsynonymous coding | 42% |
| MM12T | TSPAN11  | tetraspanin 11                                                     | CCDS31765.1     | chr12_31144821-31144821_C_T    | 245H>Y  | Substitution | Nonsynonymous coding | 34% |
| MM12T | TSPAN15  | tetraspanin 15                                                     | CCDS7294.1      | chr10_71265928-71265928_G_A    | 223V>M  | Substitution | Nonsynonymous coding | 23% |
| MM12T | TSPAN17  | tetraspanin 17                                                     | ENST00000414405 | chr5_176081482-176081482_G_T   | 35A>S   | Substitution | Nonsynonymous coding | 20% |
| MM12T | TSPEAR   | thrombospondin-type laminin G domain and EAR repeats               | CCDS13712.1     | chr21_45953644-45953644_G_A    | 156R>C  | Substitution | Nonsynonymous coding | 28% |
| MM12T | TSPO     | translocator protein (18kDa)                                       | CCDS33661.1     | chr22_43555296-43555296_G_T    | 18G>W   | Substitution | Nonsynonymous coding | 34% |
| MM12T | TSPYL1   | TSPY-like 1                                                        | CCDS34518.1     | chr6_116599778-116599778_G_A   | 406Q>X  | Substitution | Nonsense             | 16% |
| MM12T | TSSC1    | tumor suppressing subtransferable candidate 1                      | CCDS1651.1      | chr2_3196221-3196221_T_C       | 318D>G  | Substitution | Nonsynonymous coding | 29% |
| MM12T | TSSK2    | testis-specific serine kinase 2                                    | CCDS13755.1     | chr22_19119445-19119445_C_T    | 178S>L  | Substitution | Nonsynonymous coding | 13% |
| MM12T | TSSK2    | testis-specific serine kinase 2                                    | CCDS13755.1     | chr22_19119589-19119589_G_A    | 226R>H  | Substitution | Nonsynonymous coding | 25% |
| MM12T | TSSK4    | testis-specific serine kinase 4                                    | CCDS9618.1      | chr14_24675239-24675239_G_A    | 37G>E   | Substitution | Nonsynonymous coding | 32% |
| MM12T | TSTD2    | thiosulfate sulfurtransferase (rhodanese)-like domain containing 2 | CCDS6727.2      | chr9_100372737-100372737_G_A   | ISV-4>  | Substitution | Splice site acceptor | 35% |
| MM12T | TTBK2    | tau tubulin kinase 2                                               | CCDS42029.1     | chr15_43045118-43045118_C_T    | 776E>K  | Substitution | Nonsynonymous coding | 23% |

|       |        |                                                     |                 |                               |          |              |                      |     |
|-------|--------|-----------------------------------------------------|-----------------|-------------------------------|----------|--------------|----------------------|-----|
| MM12T | TTBK2  | tau tubulin kinase 2                                | CCDS42029.1     | chr15_43122137-43122137_G_A   | 144P>L   | Substitution | Nonsynonymous coding | 12% |
| MM12T | TTC21A | tetratricopeptide repeat domain 21A                 | CCDS43068.1     | chr3_39154001-39154001_C_T    | 163A>V   | Substitution | Nonsynonymous coding | 30% |
| MM12T | TTC21A | tetratricopeptide repeat domain 21A                 | CCDS43068.1     | chr3_39170371-39170371_G_A    | 623R>Q   | Substitution | Nonsynonymous coding | 33% |
| MM12T | TTC21B | tetratricopeptide repeat domain 21B                 | CCDS33315.1     | chr2_166789518-166789518_G_A  | 254L>F   | Substitution | Nonsynonymous coding | 15% |
| MM12T | TTC22  | tetratricopeptide repeat domain 22                  | CCDS44152.1     | chr1_55266373-55266373_T_C    | 155Y>C   | Substitution | Nonsynonymous coding | 23% |
| MM12T | TTC23  | tetratricopeptide repeat domain 23                  | CCDS10379.2     | chr15_99740129-99740129_G_T   | 252L>I   | Substitution | Nonsynonymous coding | 26% |
| MM12T | TTC23L | tetratricopeptide repeat domain 23-like             | NM_144725       | chr5_34863159-34863159_G_A    | 179R>H   | Substitution | Nonsynonymous coding | 13% |
| MM12T | TTC23L | tetratricopeptide repeat domain 23-like             | NM_144725       | chr5_34866993-34866993_G_A    | ISV-4>   | Substitution | Splice site acceptor | 37% |
| MM12T | TTC27  | tetratricopeptide repeat domain 27                  | CCDS33176.1     | chr2_32875262-32875262_C_T    | 201P>L   | Substitution | Nonsynonymous coding | 13% |
| MM12T | TTC29  | tetratricopeptide repeat domain 29                  | CCDS47141.1     | chr4_147628706-147628706_A_   | NA       | Deletion     | Splice site acceptor | 29% |
| MM12T | TTC37  | tetratricopeptide repeat domain 37                  | CCDS4072.1      | chr5_94842719-94842719_A_     | NA       | Deletion     | Splice site acceptor | 45% |
| MM12T | TTC39A | tetratricopeptide repeat domain 39A                 | CCDS44143.1     | chr1_51760073-51760073_A_G    | 423V>A   | Substitution | Nonsynonymous coding | 29% |
| MM12T | TTC40  | tetratricopeptide repeat domain 40                  | ENST00000368582 | chr10_134693009-134693009_G_A | 1309A>V  | Substitution | Nonsynonymous coding | 34% |
| MM12T | TTC40  | tetratricopeptide repeat domain 40                  | ENST00000368582 | chr10_134730116-134730116_C_T | 686S>N   | Substitution | Nonsynonymous coding | 19% |
| MM12T | TTC4P1 | tetratricopeptide repeat domain 4 pseudogene 1      | CCDS596.1       | chr1_55194097-55194097_G_A    | 225A>T   | Substitution | Nonsynonymous coding | 14% |
| MM12T | TTC5   | tetratricopeptide repeat domain 5                   | CCDS9546.1      | chr14_20774090-20774090_C_T   | 3A>T     | Substitution | Nonsynonymous coding | 10% |
| MM12T | TTC7B  | tetratricopeptide repeat domain 7B                  | CCDS32140.1     | chr14_91110542-91110542_G_A   | 534A>V   | Substitution | Nonsynonymous coding | 18% |
| MM12T | TTC7B  | tetratricopeptide repeat domain 7B                  | CCDS32140.1     | chr14_91161849-91161849_G_A   | 258R>X   | Substitution | Nonsense             | 16% |
| MM12T | TTC9C  | tetratricopeptide repeat domain 9C                  | CCDS8033.1      | chr11_62502916-62502916_C_A   | 101L>M   | Substitution | Nonsynonymous coding | 27% |
| MM12T | TTF1   | transcription termination factor, RNA polymerase I  | CCDS6948.1      | chr9_135276936-135276936_C_T  | 425D>N   | Substitution | Nonsynonymous coding | 34% |
| MM12T | TTF2   | transcription termination factor, RNA polymerase II | CCDS892.1       | chr1_117618210-117618210_C_T  | 335A>V   | Substitution | Nonsynonymous coding | 13% |
| MM12T | TTI1   | TELO2 interacting protein 1                         | CCDS13300.1     | chr20_36640651-36640651_G_A   | 523A>V   | Substitution | Nonsynonymous coding | 19% |
| MM12T | TTI1   | TELO2 interacting protein 1                         | CCDS13300.1     | chr20_36641881-36641881_G_A   | 113A>V   | Substitution | Nonsynonymous coding | 13% |
| MM12T | TTI2   | TELO2 interacting protein 2                         | CCDS6090.1      | chr8_33369951-33369951_C_T    | 61A>T    | Substitution | Nonsynonymous coding | 31% |
| MM12T | TTK    | TTK protein kinase                                  | CCDS4993.1      | chr6_80720630-80720630_A_     | NA       | Insertion    | Frameshift           | 45% |
| MM12T | TTL    | tubulin tyrosine ligase                             | CCDS2096.1      | chr2_113239953-113239953_G_A  | 115S>N   | Substitution | Nonsynonymous coding | 12% |
| MM12T | TLLL10 | tubulin tyrosine ligase-like family, member 10      | CCDS44036.1     | chr1_1118431-1118431_C_T      | ISV+4>   | Substitution | Splice site donor    | 39% |
| MM12T | TLLL11 | tubulin tyrosine ligase-like family, member 11      | CCDS6834.2      | chr9_124751418-124751418_G_A  | 532A>V   | Substitution | Nonsynonymous coding | 20% |
| MM12T | TLL4   | tubulin tyrosine ligase-like family, member 4       | CCDS2422.1      | chr2_219611918-219611918_G_T  | ISV+1>   | Substitution | Splice site donor    | 28% |
| MM12T | TTN    | titin                                               | ENST00000356127 | chr2_179404312-179404312_T_C  | 30257D>G | Substitution | Nonsynonymous coding | 36% |
| MM12T | TTN    | titin                                               | ENST00000356127 | chr2_179410711-179410711_C_T  | 29181S>N | Substitution | Nonsynonymous coding | 13% |
| MM12T | TTN    | titin                                               | ENST00000356127 | chr2_179411796-179411796_G_A  | 28916L>F | Substitution | Nonsynonymous coding | 38% |

|       |         |                                                          |                 |                               |          |              |                      |     |
|-------|---------|----------------------------------------------------------|-----------------|-------------------------------|----------|--------------|----------------------|-----|
| MM12T | TTN     | titin                                                    | ENST00000356127 | chr2_179429978-179429978_C_T  | 24391A>T | Substitution | Nonsynonymous coding | 29% |
| MM12T | TTN     | titin                                                    | ENST00000356127 | chr2_179432858-179432858_C_T  | 23431A>T | Substitution | Nonsynonymous coding | 14% |
| MM12T | TTN     | titin                                                    | ENST00000356127 | chr2_179439512-179439512_G_A  | 21213R>C | Substitution | Nonsynonymous coding | 18% |
| MM12T | TTN     | titin                                                    | ENST00000356127 | chr2_179444893-179444893_G_A  | 19804T>I | Substitution | Nonsynonymous coding | 19% |
| MM12T | TTN     | titin                                                    | ENST00000356127 | chr2_179466262-179466262_C_T  | 15920V>I | Substitution | Nonsynonymous coding | 38% |
| MM12T | TTN     | titin                                                    | ENST00000356127 | chr2_179548802-179548802_C_A  | 9666E>D  | Substitution | Nonsynonymous coding | 13% |
| MM12T | TTN     | titin                                                    | ENST00000356127 | chr2_179553484-179553484_A_G  | 9462V>A  | Substitution | Nonsynonymous coding | 25% |
| MM12T | TTN     | titin                                                    | ENST00000356127 | chr2_179600592-179600592_C_T  | 3617D>N  | Substitution | Nonsynonymous coding | 11% |
| MM12T | TTN     | titin                                                    | ENST00000342175 | chr2_179605095-179605095_G_A  | 4118P>S  | Substitution | Nonsynonymous coding | 30% |
| MM12T | TTN     | titin                                                    | NM_133379       | chr2_179612149-179612149_G_T  | 4993S>Y  | Substitution | Nonsynonymous coding | 26% |
| MM12T | TTN     | titin                                                    | NM_133379       | chr2_179612744-179612744_G_A  | 4795P>S  | Substitution | Nonsynonymous coding | 38% |
| MM12T | TTN     | titin                                                    | NM_133379       | chr2_179641361-179641361_G_A  | 1744P>S  | Substitution | Nonsynonymous coding | 41% |
| MM12T | TTN     | titin                                                    | NM_133379       | chr2_179647077-179647077_G_A  | 1081A>V  | Substitution | Nonsynonymous coding | 18% |
| MM12T | TTYH2   | tweety homolog 2 (Drosophila)                            | CCDS32717.1     | chr17_72240181-72240181_C_T   | 266A>V   | Substitution | Nonsynonymous coding | 14% |
| MM12T | TUB     | tubby homolog (mouse)                                    | CCDS7786.1      | chr11_8111688-8111688_C_T     | 110R>W   | Substitution | Nonsynonymous coding | 23% |
| MM12T | TUB     | tubby homolog (mouse)                                    | CCDS7786.1      | chr11_8111714-8111714_G_T     | 118Q>H   | Substitution | Nonsynonymous coding | 24% |
| MM12T | TUB     | tubby homolog (mouse)                                    | CCDS7786.1      | chr11_8123062-8123062_G_A     | 528V>I   | Substitution | Nonsynonymous coding | 34% |
| MM12T | TUBB1   | tubulin, beta 1 class VI                                 | CCDS13475.1     | chr20_57599135-57599135_C_T   | 218T>M   | Substitution | Nonsynonymous coding | 31% |
| MM12T | TUBB6   | tubulin, beta 6 class V                                  | CCDS11858.1     | chr18_12325117-12325117_C_T   | 110A>V   | Substitution | Nonsynonymous coding | 11% |
| MM12T | TUBGCP2 | tubulin, gamma complex associated protein 2              | CCDS7676.1      | chr10_135101802-135101802_C_T | 518R>H   | Substitution | Nonsynonymous coding | 37% |
| MM12T | TUBGCP6 | tubulin, gamma complex associated protein 6              | CCDS14087.1     | chr22_50656526-50656526_G_A   | 1730A>V  | Substitution | Nonsynonymous coding | 11% |
| MM12T | TUBGCP6 | tubulin, gamma complex associated protein 6              | CCDS14087.1     | chr22_50660914-50660914_C_T   | 793R>H   | Substitution | Nonsynonymous coding | 37% |
| MM12T | TUBGCP6 | tubulin, gamma complex associated protein 6              | CCDS14087.1     | chr22_50662636-50662636_G_A   | 735A>V   | Substitution | Nonsynonymous coding | 18% |
| MM12T | TUSC5   | tumor suppressor candidate 5                             | CCDS42225.1     | chr17_1183567-1183567_C_T     | 91T>I    | Substitution | Nonsynonymous coding | 14% |
| MM12T | TUT1    | terminal uridylyl transferase 1, U6 snRNA-specific       | CCDS8021.1      | chr11_62342592-62342592_G_A   | 867P>S   | Substitution | Nonsynonymous coding | 13% |
| MM12T | TWF1    | twinfilin, actin-binding protein, homolog 1 (Drosophila) | CCDS31780.1     | chr12_44194334-44194334_C_A   | ISV-1>   | Substitution | Splice site acceptor | 39% |
| MM12T | TXLNG   | taxilin gamma                                            | CCDS14178.1     | chrX_16859845-16859845_C_T    | 515P>S   | Substitution | Nonsynonymous coding | 29% |
| MM12T | TXN2    | thioredoxin 2                                            | CCDS13928.1     | chr22_36876621-36876621_C_T   | ISV+1>   | Substitution | Splice site donor    | 11% |
| MM12T | TXNDC16 | thioredoxin domain containing 16                         | CCDS32083.1     | chr14_53004330-53004330_C_A   | 102A>S   | Substitution | Nonsynonymous coding | 24% |
| MM12T | TXNDC2  | thioredoxin domain containing 2 (spermatzoa)             | CCDS42414.1     | chr18_9887924-9887924_G_A     | 483C>Y   | Substitution | Nonsynonymous coding | 30% |
| MM12T | TXNL1   | thioredoxin-like 1                                       | CCDS11961.1     | chr18_54278226-54278226_G_A   | 280R>X   | Substitution | Nonsense             | 23% |
| MM12T | TXNRD2  | thioredoxin reductase 2                                  | ENST00000334361 | chr22_19906396-19906396_C_T   | 121V>M   | Substitution | Nonsynonymous coding | 63% |

|       |         |                                                               |                 |                              |         |              |                      |     |
|-------|---------|---------------------------------------------------------------|-----------------|------------------------------|---------|--------------|----------------------|-----|
| MM12T | TYMS    | thymidylate synthetase                                        | CCDS11821.1     | chr18_670725-670725_C_T      | 197A>V  | Substitution | Nonsynonymous coding | 32% |
| MM12T | TYMS    | thymidylate synthetase                                        | CCDS11821.1     | chr18_669163-669163_G_A      | 182W>X  | Substitution | Nonsense             | 22% |
| MM12T | TYRP1   | tyrosinase-related protein 1                                  | CCDS34990.1     | chr9_12708979-12708979_C_T   | 471R>W  | Substitution | Nonsynonymous coding | 12% |
| MM12T | TYSND1  | trypsin domain containing 1                                   | CCDS31213.1     | chr10_71906320-71906320_G_A  | 8A>V    | Substitution | Nonsynonymous coding | 14% |
| MM12T | TYW1B   | tRNA-yW synthesizing protein 1 homolog B (S. cerevisiae)      | ENST00000438904 | chr7_72277853-72277853_C_T   | 134G>S  | Substitution | Nonsynonymous coding | 40% |
| MM12T | TYW1B   | tRNA-yW synthesizing protein 1 homolog B (S. cerevisiae)      | ENST00000438904 | chr7_72277903-72277903_C_T   | 117R>H  | Substitution | Nonsynonymous coding | 38% |
| MM12T | U2AF1L4 | U2 small nuclear RNA auxiliary factor 1-like 4                | CCDS12473.1     | chr19_36233654-36233654_C_T  | 152G>S  | Substitution | Nonsynonymous coding | 29% |
| MM12T | U2AF2   | U2 small nuclear RNA auxiliary factor 2                       | CCDS12933.1     | chr19_56180147-56180147_G_A  | 312V>I  | Substitution | Nonsynonymous coding | 15% |
| MM12T | U2SURP  | U2 snRNP-associated SURP domain containing                    | CCDS46928.1     | chr3_142753780-142753780_G_A | 635R>H  | Substitution | Nonsynonymous coding | 31% |
| MM12T | UBA1    | ubiquitin-like modifier activating enzyme 1                   | CCDS14275.1     | chrX_47065510-47065510_C_T   | 580A>V  | Substitution | Nonsynonymous coding | 28% |
| MM12T | UBA3    | ubiquitin-like modifier activating enzyme 3                   | CCDS2909.1      | chr3_69112658-69112658_C_    | NA      | Deletion     | Splice site acceptor | 20% |
| MM12T | UBA7    | ubiquitin-like modifier activating enzyme 7                   | CCDS2805.1      | chr3_49850093-49850093_C_A   | 182Q>H  | Substitution | Nonsynonymous coding | 11% |
| MM12T | UBAP2L  | ubiquitin associated protein 2-like                           | CCDS1063.1      | chr1_154226471-154226471_C_T | 587A>V  | Substitution | Nonsynonymous coding | 28% |
| MM12T | UBE2B   | ubiquitin-conjugating enzyme E2B                              | CCDS4174.1      | chr5_133725989-133725989_G_A | 135R>Q  | Substitution | Nonsynonymous coding | 14% |
| MM12T | UBE2D2  | ubiquitin-conjugating enzyme E2D 2                            | CCDS43369.1     | chr5_138994515-138994515_C_T | 90R>X   | Substitution | Nonsense             | 23% |
| MM12T | UBE2O   | ubiquitin-conjugating enzyme E2O                              | CCDS32742.1     | chr17_74388095-74388095_G_A  | 1016P>S | Substitution | Nonsynonymous coding | 18% |
| MM12T | UBE2Z   | ubiquitin-conjugating enzyme E2Z                              | CCDS11540.2     | chr17_46990214-46990214_G_A  | 137G>S  | Substitution | Nonsynonymous coding | 23% |
| MM12T | UBE4B   | ubiquitination factor E4B                                     | CCDS41245.1     | chr1_10205077-10205077_C_T   | 815R>C  | Substitution | Nonsynonymous coding | 28% |
| MM12T | UBE4B   | ubiquitination factor E4B                                     | CCDS41245.1     | chr1_10239470-10239470_G_A   | ISV-4>  | Substitution | Splice site acceptor | 15% |
| MM12T | UBL3    | ubiquitin-like 3                                              | CCDS9334.1      | chr13_30346279-30346279_G_A  | 65R>X   | Substitution | Nonsense             | 35% |
| MM12T | UBLCP1  | ubiquitin-like domain containing CTD phosphatase 1            | CCDS4345.1      | chr5_158705280-158705280_C_T | 240S>L  | Substitution | Nonsynonymous coding | 14% |
| MM12T | UBN2    | ubiquitin 2                                                   | CCDS43655.1     | chr7_138977990-138977990_G_T | 1145A>S | Substitution | Nonsynonymous coding | 34% |
| MM12T | UBQLN3  | ubiquilin 3                                                   | CCDS7758.1      | chr11_5530086-5530086_G_A    | 235R>C  | Substitution | Nonsynonymous coding | 27% |
| MM12T | UBR3    | ubiquitin protein ligase E3 component n-recognin 3 (putative) | CCDS2238.2      | chr2_170783910-170783910_G_A | 807D>N  | Substitution | Nonsynonymous coding | 15% |
| MM12T | UBR4    | ubiquitin protein ligase E3 component n-recognin 4            | CCDS189.1       | chr1_19407898-19407898_G_A   | 5060R>W | Substitution | Nonsynonymous coding | 36% |
| MM12T | UBR4    | ubiquitin protein ligase E3 component n-recognin 4            | CCDS189.1       | chr1_19413279-19413279_G_A   | 4861R>W | Substitution | Nonsynonymous coding | 10% |
| MM12T | UBR4    | ubiquitin protein ligase E3 component n-recognin 4            | CCDS189.1       | chr1_19420543-19420543_G_A   | 4613L>F | Substitution | Nonsynonymous coding | 34% |
| MM12T | UBR4    | ubiquitin protein ligase E3 component n-recognin 4            | CCDS189.1       | chr1_19421428-19421428_G_A   | 4573S>F | Substitution | Nonsynonymous coding | 33% |
| MM12T | UBR4    | ubiquitin protein ligase E3 component n-recognin 4            | CCDS189.1       | chr1_19499451-19499451_G_T   | 1143A>D | Substitution | Nonsynonymous coding | 33% |
| MM12T | UBR4    | ubiquitin protein ligase E3 component n-recognin 4            | CCDS189.1       | chr1_19524176-19524176_G_T   | 294A>D  | Substitution | Nonsynonymous coding | 14% |
| MM12T | UBTD1   | ubiquitin domain containing 1                                 | CCDS7465.1      | chr10_99330089-99330089_G_A  | 165A>T  | Substitution | Nonsynonymous coding | 11% |
| MM12T | UBXN1   | UBX domain protein 1                                          | CCDS8029.1      | chr11_62445523-62445523_G_A  | 120R>W  | Substitution | Nonsynonymous coding | 23% |

|       |           |                                                                     |                 |                               |         |              |                      |     |
|-------|-----------|---------------------------------------------------------------------|-----------------|-------------------------------|---------|--------------|----------------------|-----|
| MM12T | UCKL1     | uridine-cytidine kinase 1-like 1                                    | CCDS13547.1     | chr20_62572556-62572556_G_A   | 310A>V  | Substitution | Nonsynonymous coding | 17% |
| MM12T | UCKL1     | uridine-cytidine kinase 1-like 1                                    | CCDS13547.1     | chr20_62576006-62576006_C_T   | 246G>S  | Substitution | Nonsynonymous coding | 35% |
| MM12T | UGGT1     | UDP-glucose glycoprotein glucosyltransferase 1                      | CCDS2154.1      | chr2_128885017-128885017_A_C  | 406D>A  | Substitution | Nonsynonymous coding | 26% |
| MM12T | UGGT2     | UDP-glucose glycoprotein glucosyltransferase 2                      | CCDS9480.1      | chr13_96665659-96665659_C_T   | 188A>T  | Substitution | Nonsynonymous coding | 35% |
| MM12T | UGT2A1    | UDP glucuronosyltransferase 2 family, polypeptide A1, complex locus | CCDS3529.1      | chr4_70513136-70513136_A_G    | 76V>A   | Substitution | Nonsynonymous coding | 43% |
| MM12T | UHRF1BP1L | UHRF1 binding protein 1-like                                        | CCDS31882.1     | chr12_100453807-100453807_G_T | 522L>I  | Substitution | Nonsynonymous coding | 26% |
| MM12T | ULK1      | unc-51-like kinase 1 (C. elegans)                                   | CCDS9274.1      | chr12_132393189-132393189_C_T | 106A>V  | Substitution | Nonsynonymous coding | 44% |
| MM12T | ULK1      | unc-51-like kinase 1 (C. elegans)                                   | CCDS9274.1      | chr12_132393282-132393282_G_A | 137R>H  | Substitution | Nonsynonymous coding | 31% |
| MM12T | ULK2      | unc-51-like kinase 2 (C. elegans)                                   | CCDS11213.1     | chr17_19750061-19750061_C_T   | 153R>H  | Substitution | Nonsynonymous coding | 14% |
| MM12T | ULK4      | unc-51-like kinase 4 (C. elegans)                                   | CCDS43071.1     | chr3_41877403-41877403_A_C    | 573C>G  | Substitution | Nonsynonymous coding | 38% |
| MM12T | UMODL1    | uromodulin-like 1                                                   | CCDS42935.1     | chr21_43496356-43496356_C_T   | 107P>S  | Substitution | Nonsynonymous coding | 12% |
| MM12T | UNC119B   | unc-119 homolog B (C. elegans)                                      | CCDS31914.1     | chr12_121154485-121154485_G_A | 138R>H  | Substitution | Nonsynonymous coding | 22% |
| MM12T | UNC13A    | unc-13 homolog A (C. elegans)                                       | CCDS46013.1     | chr19_17753753-17753753_T_G   | 879K>N  | Substitution | Nonsynonymous coding | 32% |
| MM12T | UNC13C    | unc-13 homolog C (C. elegans)                                       | CCDS45264.1     | chr15_54307637-54307637_C_T   | 846T>I  | Substitution | Nonsynonymous coding | 31% |
| MM12T | UNC13C    | unc-13 homolog C (C. elegans)                                       | CCDS45264.1     | chr15_54707232-54707232_C_A   | 1634L>I | Substitution | Nonsynonymous coding | 21% |
| MM12T | UNC45B    | unc-45 homolog B (C. elegans)                                       | CCDS11292.1     | chr17_33495337-33495337_A_G   | 470Y>C  | Substitution | Nonsynonymous coding | 10% |
| MM12T | UNC45B    | unc-45 homolog B (C. elegans)                                       | CCDS11292.1     | chr17_33496947-33496947_G_A   | 515R>H  | Substitution | Nonsynonymous coding | 36% |
| MM12T | UNC50     | unc-50 homolog (C. elegans)                                         | CCDS2035.1      | chr2_99232993-99232993_A_C    | 214S>R  | Substitution | Nonsynonymous coding | 33% |
| MM12T | UNC5B     | unc-5 homolog B (C. elegans)                                        | CCDS7309.1      | chr10_73056446-73056446_C_T   | 813R>W  | Substitution | Nonsynonymous coding | 23% |
| MM12T | UNC5C     | unc-5 homolog C (C. elegans)                                        | CCDS3643.1      | chr4_96222873-96222873_T_G    | 125E>A  | Substitution | Nonsynonymous coding | 20% |
| MM12T | UNC5CL    | unc-5 homolog C (C. elegans)-like                                   | CCDS4847.1      | chr6_41000845-41000845_C_A    | 243A>S  | Substitution | Nonsynonymous coding | 11% |
| MM12T | UNC79     | unc-79 homolog (C. elegans)                                         | CCDS9911.2      | chr14_94088132-94088132_G_A   | 1341R>H | Substitution | Nonsynonymous coding | 31% |
| MM12T | UNC93B1   | unc-93 homolog B1 (C. elegans)                                      | ENST00000227471 | chr11_67764155-67764155_C_T   | 335R>H  | Substitution | Nonsynonymous coding | 26% |
| MM12T | UNK       | unkempt homolog (Drosophila)                                        | CCDS45778.1     | chr17_73819534-73819534_G_T   | 812E>D  | Substitution | Nonsynonymous coding | 19% |
| MM12T | UPF1      | UPF1 regulator of nonsense transcripts homolog (yeast)              | CCDS12386.1     | chr19_18976507-18976507_G_A   | 1053A>T | Substitution | Nonsynonymous coding | 29% |
| MM12T | UPK2      | uroplakin 2                                                         | CCDS8404.1      | chr11_118828884-118828884_G_A | 166A>T  | Substitution | Nonsynonymous coding | 10% |
| MM12T | UPK3A     | uroplakin 3A                                                        | CCDS14064.1     | chr22_45681896-45681896_G_A   | 43E>K   | Substitution | Nonsynonymous coding | 12% |
| MM12T | UQCRC2    | ubiquinol-cytochrome c reductase core protein II                    | CCDS10601.1     | chr16_21968593-21968593_C_T   | 24A>V   | Substitution | Nonsynonymous coding | 43% |
| MM12T | URB1      | URB1 ribosome biogenesis 1 homolog (S. cerevisiae)                  | CCDS46645.1     | chr21_33717849-33717849_G_T   | 1302L>M | Substitution | Nonsynonymous coding | 34% |
| MM12T | URB2      | URB2 ribosome biogenesis 2 homolog (S. cerevisiae)                  | CCDS31052.1     | chr1_229773692-229773692_G_A  | 1111R>H | Substitution | Nonsynonymous coding | 12% |
| MM12T | URB2      | URB2 ribosome biogenesis 2 homolog (S. cerevisiae)                  | CCDS31052.1     | chr1_229790035-229790035_G_A  | 1426R>H | Substitution | Nonsynonymous coding | 34% |
| MM12T | URB2      | URB2 ribosome biogenesis 2 homolog (S. cerevisiae)                  | CCDS31052.1     | chr1_229768102-229768102_G_A  | 71W>X   | Substitution | Nonsense             | 41% |

|       |       |                                                                 |                 |                               |         |              |                      |     |
|-------|-------|-----------------------------------------------------------------|-----------------|-------------------------------|---------|--------------|----------------------|-----|
| MM12T | UROC1 | urocanate hydratase 1                                           | CCDS3038.1      | chr3_126218249-126218249_G_A  | 416A>V  | Substitution | Nonsynonymous coding | 32% |
| MM12T | UROD  | uroporphyrinogen decarboxylase                                  | CCDS518.1       | chr1_45481018-45481018_G_A    | 318G>R  | Substitution | Nonsynonymous coding | 53% |
| MM12T | USF1  | upstream transcription factor 1                                 | CCDS1214.1      | chr1_161011504-161011504_C_T  | 137A>T  | Substitution | Nonsynonymous coding | 11% |
| MM12T | USH1C | Usher syndrome 1C (autosomal recessive, severe)                 | CCDS7825.1      | chr11_17526205-17526205_C_A   | 725A>S  | Substitution | Nonsynonymous coding | 19% |
| MM12T | USH1C | Usher syndrome 1C (autosomal recessive, severe)                 | CCDS7825.1      | chr11_17531123-17531123_C_T   | 598R>H  | Substitution | Nonsynonymous coding | 35% |
| MM12T | USH1C | Usher syndrome 1C (autosomal recessive, severe)                 | CCDS7825.1      | chr11_17565827-17565827_G_A   | 10R>W   | Substitution | Nonsynonymous coding | 16% |
| MM12T | USH2A | Usher syndrome 2A (autosomal recessive, mild)                   | CCDS31025.1     | chr1_216062028-216062028_C_T  | 2655E>K | Substitution | Nonsynonymous coding | 26% |
| MM12T | USO1  | USO1 vesicle transport factor                                   | NM_003715       | chr4_76711833-76711833_G_A    | 324M>I  | Substitution | Nonsynonymous coding | 18% |
| MM12T | USP10 | ubiquitin specific peptidase 10                                 | CCDS45537.1     | chr16_84812515-84812515_G_A   | 742G>S  | Substitution | Nonsynonymous coding | 28% |
| MM12T | USP11 | ubiquitin specific peptidase 11                                 | CCDS14277.1     | chrX_47100229-47100229_G_A    | 310G>D  | Substitution | Nonsynonymous coding | 17% |
| MM12T | USP14 | ubiquitin specific peptidase 14 (tRNA-guanine transglycosylase) | CCDS32780.1     | chr18_178960-178960_G_A       | 75A>T   | Substitution | Nonsynonymous coding | 26% |
| MM12T | USP15 | ubiquitin specific peptidase 15                                 | CCDS8963.1      | chr12_62777759-62777759_G_A   | 381A>T  | Substitution | Nonsynonymous coding | 25% |
| MM12T | USP19 | ubiquitin specific peptidase 19                                 | CCDS43090.1     | chr3_49149389-49149389_C_T    | 850R>H  | Substitution | Nonsynonymous coding | 23% |
| MM12T | USP19 | ubiquitin specific peptidase 19                                 | CCDS43090.1     | chr3_49151620-49151620_C_A    | 694S>I  | Substitution | Nonsynonymous coding | 14% |
| MM12T | USP2  | ubiquitin specific peptidase 2                                  | CCDS8422.1      | chr11_119244177-119244177_G_A | 5S>F    | Substitution | Nonsynonymous coding | 30% |
| MM12T | USP20 | ubiquitin specific peptidase 20                                 | CCDS43892.1     | chr9_132630515-132630515_G_A  | 308E>K  | Substitution | Nonsynonymous coding | 32% |
| MM12T | USP21 | ubiquitin specific peptidase 21                                 | CCDS30920.1     | chr1_161130827-161130827_G_A  | 133G>R  | Substitution | Nonsynonymous coding | 31% |
| MM12T | USP21 | ubiquitin specific peptidase 21                                 | CCDS30920.1     | chr1_161134825-161134825_C_A  | 500P>H  | Substitution | Nonsynonymous coding | 14% |
| MM12T | USP22 | ubiquitin specific peptidase 22                                 | CCDS42285.1     | chr17_20924496-20924496_C_A   | 116Q>H  | Substitution | Nonsynonymous coding | 35% |
| MM12T | USP22 | ubiquitin specific peptidase 22                                 | CCDS42285.1     | chr17_20931866-20931866_C_T   | 98R>Q   | Substitution | Nonsynonymous coding | 19% |
| MM12T | USP24 | ubiquitin specific peptidase 24                                 | CCDS44154.1     | chr1_55547094-55547094_G_A    | 2167R>C | Substitution | Nonsynonymous coding | 12% |
| MM12T | USP26 | ubiquitin specific peptidase 26                                 | CCDS14635.1     | chrX_132160816-132160816_G_T  | 478S>Y  | Substitution | Nonsynonymous coding | 11% |
| MM12T | USP28 | ubiquitin specific peptidase 28                                 | CCDS31680.1     | chr11_113672244-113672244_T_C | 1007R>G | Substitution | Nonsynonymous coding | 20% |
| MM12T | USP28 | ubiquitin specific peptidase 28                                 | CCDS31680.1     | chr11_113704982-113704982_G_A | 204R>X  | Substitution | Nonsense             | 24% |
| MM12T | USP35 | ubiquitin specific peptidase 35                                 | CCDS41693.1     | chr11_77907680-77907680_G_A   | 130R>H  | Substitution | Nonsynonymous coding | 50% |
| MM12T | USP35 | ubiquitin specific peptidase 35                                 | CCDS41693.1     | chr11_77921591-77921591_G_A   | 897R>Q  | Substitution | Nonsynonymous coding | 23% |
| MM12T | USP4  | ubiquitin specific peptidase 4 (proto-oncogene)                 | CCDS2793.1      | chr3_49339841-49339841_C_A    | 421K>N  | Substitution | Nonsynonymous coding | 47% |
| MM12T | USP4  | ubiquitin specific peptidase 4 (proto-oncogene)                 | ENST00000415188 | chr3_49354915-49354915_T      | NA      | Insertion    | Splice site acceptor | 20% |
| MM12T | USP43 | ubiquitin specific peptidase 43                                 | CCDS45610.1     | chr17_9596537-9596537_G_A     | 483A>T  | Substitution | Nonsynonymous coding | 33% |
| MM12T | USP47 | ubiquitin specific peptidase 47                                 | CCDS41619.1     | chr11_11924837-11924837_T_C   | 188L>P  | Substitution | Nonsynonymous coding | 30% |
| MM12T | USP8  | ubiquitin specific peptidase 8                                  | CCDS10137.1     | chr15_50784990-50784990_T_C   | 776L>P  | Substitution | Nonsynonymous coding | 23% |
| MM12T | USPL1 | ubiquitin specific peptidase like 1                             | CCDS9336.1      | chr13_31232745-31232745_C_A   | 844A>D  | Substitution | Nonsynonymous coding | 30% |

|       |        |                                                                         |                 |                               |         |              |                      |     |
|-------|--------|-------------------------------------------------------------------------|-----------------|-------------------------------|---------|--------------|----------------------|-----|
| MM12T | USPL1  | ubiquitin specific peptidase like 1                                     | CCDS9336.1      | chr13_31232906-31232906_G_A   | 898A>T  | Substitution | Nonsynonymous coding | 11% |
| MM12T | UTP18  | UTP18 small subunit (SSU) processome component homolog (yeast)          | CCDS42362.1     | chr17_49343617-49343617_A_G   | 177N>S  | Substitution | Nonsynonymous coding | 35% |
| MM12T | UTP20  | UTP20, small subunit (SSU) processome component, homolog (yeast)        | CCDS9081.1      | chr12_101748645-101748645_G_A | 1715A>T | Substitution | Nonsynonymous coding | 13% |
| MM12T | UTP20  | UTP20, small subunit (SSU) processome component, homolog (yeast)        | CCDS9081.1      | chr12_101773199-101773199_G_A | 2483A>T | Substitution | Nonsynonymous coding | 24% |
| MM12T | UTP3   | UTP3, small subunit (SSU) processome component, homolog (S. cerevisiae) | CCDS3546.1      | chr4_71555596-71555596_C_T    | 401A>V  | Substitution | Nonsynonymous coding | 32% |
| MM12T | UTRN   | utrophin                                                                | ENST00000367526 | chr6_144904630-144904630_T_C  | 13L>P   | Substitution | Nonsynonymous coding | 26% |
| MM12T | UTRN   | utrophin                                                                | CCDS34547.1     | chr6_145093060-145093060_C_T  | 2838T>I | Substitution | Nonsynonymous coding | 17% |
| MM12T | UTRN   | utrophin                                                                | CCDS34547.1     | chr6_145103201-145103201_G_A  | 2926V>I | Substitution | Nonsynonymous coding | 34% |
| MM12T | VANGL2 | vang-like 2 (van gogh, Drosophila)                                      | CCDS30915.1     | chr1_160388873-160388873_G_A  | 92A>T   | Substitution | Nonsynonymous coding | 14% |
| MM12T | VARS2  | valyl-tRNA synthetase 2, mitochondrial                                  | CCDS34387.1     | chr6_30883146-30883146_C_A    | 100L>M  | Substitution | Nonsynonymous coding | 19% |
| MM12T | VASN   | vasorin                                                                 | CCDS10514.1     | chr16_4431203-4431203_G_A     | 109A>T  | Substitution | Nonsynonymous coding | 31% |
| MM12T | VAV1   | vav 1 guanine nucleotide exchange factor                                | CCDS12174.1     | chr19_6820777-6820777_G_A     | 90R>Q   | Substitution | Nonsynonymous coding | 29% |
| MM12T | VAV1   | vav 1 guanine nucleotide exchange factor                                | CCDS12174.1     | chr19_6828455-6828455_C_T     | 350A>V  | Substitution | Nonsynonymous coding | 13% |
| MM12T | VAX1   | ventral anterior homeobox 1                                             | CCDS7597.1      | chr10_118891976-118891976_C_T | 148E>K  | Substitution | Nonsynonymous coding | 19% |
| MM12T | VAX2   | ventral anterior homeobox 2                                             | CCDS1911.1      | chr2_71159963-71159963_C_T    | 168R>W  | Substitution | Nonsynonymous coding | 12% |
| MM12T | VCAN   | versican                                                                | CCDS4060.1      | chr5_82816074-82816074_G_A    | 650R>H  | Substitution | Nonsynonymous coding | 36% |
| MM12T | VCL    | vinculin                                                                | CCDS7341.1      | chr10_75864880-75864880_G_A   | 735D>N  | Substitution | Nonsynonymous coding | 13% |
| MM12T | VCP    | valosin containing protein                                              | CCDS6573.1      | chr9_35059665-35059665_C_T    | 610G>D  | Substitution | Nonsynonymous coding | 14% |
| MM12T | VIL1   | villin 1                                                                | CCDS2417.1      | chr2_219301879-219301879_G_T  | 668E>D  | Substitution | Nonsynonymous coding | 20% |
| MM12T | VILL   | villin-like                                                             | CCDS2670.2      | chr3_38040860-38040860_G_A    | 371G>D  | Substitution | Nonsynonymous coding | 30% |
| MM12T | VIM    | vimentin                                                                | CCDS7120.1      | chr10_17271528-17271528_G_A   | 36R>H   | Substitution | Nonsynonymous coding | 14% |
| MM12T | VIM    | vimentin                                                                | CCDS7120.1      | chr10_17275887-17275887_C_A   | 280A>D  | Substitution | Nonsynonymous coding | 38% |
| MM12T | VMAC   | vimentin-type intermediate filament associated coiled-coil protein      | CCDS32881.1     | chr19_5904953-5904953_G_T     | 18A>S   | Substitution | Nonsynonymous coding | 43% |
| MM12T | VNN3   | vanin 3                                                                 | CCDS5160.1      | chr6_133052667-133052667_C_A  | ISV-1>  | Substitution | Splice site acceptor | 21% |
| MM12T | VPREB1 | pre-B lymphocyte 1                                                      | CCDS13798.1     | chr22_22599405-22599405_G_A   | 32A>T   | Substitution | Nonsynonymous coding | 12% |
| MM12T | VPS13B | vacuolar protein sorting 13 homolog B (yeast)                           | CCDS6280.1      | chr8_100108599-100108599_A_C  | 117K>N  | Substitution | Nonsynonymous coding | 23% |
| MM12T | VPS13B | vacuolar protein sorting 13 homolog B (yeast)                           | CCDS6280.1      | chr8_100673636-100673636_C_T  | 2013T>I | Substitution | Nonsynonymous coding | 29% |
| MM12T | VPS13B | vacuolar protein sorting 13 homolog B (yeast)                           | CCDS6280.1      | chr8_100729458-100729458_C_A  | 2197L>I | Substitution | Nonsynonymous coding | 38% |
| MM12T | VPS13B | vacuolar protein sorting 13 homolog B (yeast)                           | CCDS6280.1      | chr8_100729573-100729573_C_T  | 2235S>F | Substitution | Nonsynonymous coding | 13% |
| MM12T | VPS13C | vacuolar protein sorting 13 homolog C (S. cerevisiae)                   | CCDS32257.1     | chr15_62253984-62253984_G_A   | 1238R>C | Substitution | Nonsynonymous coding | 14% |
| MM12T | VPS13D | vacuolar protein sorting 13 homolog D (S. cerevisiae)                   | CCDS30588.1     | chr1_12520387-12520387_G_A    | 4200A>T | Substitution | Nonsynonymous coding | 24% |
| MM12T | VPS35  | vacuolar protein sorting 35 homolog (S. cerevisiae)                     | CCDS10721.1     | chr16_46715289-46715289_A_C   | 108L>R  | Substitution | Nonsynonymous coding | 25% |



|       |         |                                                       |                 |                               |         |              |                      |     |
|-------|---------|-------------------------------------------------------|-----------------|-------------------------------|---------|--------------|----------------------|-----|
| MM12T | VPS35   | vacuolar protein sorting 35 homolog (S. cerevisiae)   | CCDS10721.1     | chr16_46715288-46715288_C_A   | ISV+1>  | Substitution | Splice site donor    | 27% |
| MM12T | VPS37A  | vacuolar protein sorting 37 homolog A (S. cerevisiae) | CCDS6001.1      | chr8_17137612-17137612_A_T    | 263K>N  | Substitution | Nonsynonymous coding | 12% |
| MM12T | VPS39   | vacuolar protein sorting 39 homolog (S. cerevisiae)   | CCDS10083.1     | chr15_42458416-42458416_G_A   | 541H>Y  | Substitution | Nonsynonymous coding | 18% |
| MM12T | VPS41   | vacuolar protein sorting 41 homolog (S. cerevisiae)   | CCDS5457.1      | chr7_38812198-38812198_G_A    | 351P>L  | Substitution | Nonsynonymous coding | 42% |
| MM12T | VPS51   | vacuolar protein sorting 51 homolog (S. cerevisiae)   | CCDS8093.1      | chr11_64875352-64875352_G_A   | 195A>T  | Substitution | Nonsynonymous coding | 20% |
| MM12T | VPS51   | vacuolar protein sorting 51 homolog (S. cerevisiae)   | CCDS8093.1      | chr11_64879052-64879052_G_A   | 781R>H  | Substitution | Nonsynonymous coding | 37% |
| MM12T | VPS53   | vacuolar protein sorting 53 homolog (S. cerevisiae)   | CCDS45558.1     | chr17_505051-505051_T_C       | 401K>R  | Substitution | Nonsynonymous coding | 13% |
| MM12T | VPS53   | vacuolar protein sorting 53 homolog (S. cerevisiae)   | CCDS45558.1     | chr17_530540-530540_T_C       | 283K>R  | Substitution | Nonsynonymous coding | 39% |
| MM12T | VPS53   | vacuolar protein sorting 53 homolog (S. cerevisiae)   | CCDS45558.1     | chr17_600713-600713_T_C       | 77D>G   | Substitution | Nonsynonymous coding | 25% |
| MM12T | VPS72   | vacuolar protein sorting 72 homolog (S. cerevisiae)   | CCDS989.1       | chr1_151149371-151149371_G_A  | 282R>W  | Substitution | Nonsynonymous coding | 35% |
| MM12T | VPS72   | vacuolar protein sorting 72 homolog (S. cerevisiae)   | CCDS989.1       | chr1_151158300-151158300_G_A  | 82R>C   | Substitution | Nonsynonymous coding | 29% |
| MM12T | VPS9D1  | VPS9 domain containing 1                              | ENST00000261625 | chr16_89785621-89785621_C_A   | 26D>Y   | Substitution | Nonsynonymous coding | 12% |
| MM12T | VSIG1   | V-set and immunoglobulin domain containing 1          | CCDS14535.1     | chrX_107316479-107316479_G_T  | ISV-1>  | Substitution | Splice site acceptor | 36% |
| MM12T | VSIG4   | V-set and immunoglobulin domain containing 4          | ENST00000427538 | chrX_65241945-65241945_G_A    | 269P>S  | Substitution | Nonsynonymous coding | 34% |
| MM12T | VSX1    | visual system homeobox 1                              | CCDS13168.1     | chr20_25062402-25062402_G_A   | 111P>S  | Substitution | Nonsynonymous coding | 23% |
| MM12T | VWA3A   | von Willebrand factor A domain containing 3A          | CCDS45441.1     | chr16_22111790-22111790_G_A   | 135R>H  | Substitution | Nonsynonymous coding | 18% |
| MM12T | VWA3B   | von Willebrand factor A domain containing 3B          | CCDS42718.1     | chr2_98928416-98928416_C_T    | 1219A>V | Substitution | Nonsynonymous coding | 27% |
| MM12T | VWA5B2  | von Willebrand factor A domain containing 5B2         | NM_138345       | chr3_183953061-183953061_C_T  | 356L>F  | Substitution | Nonsynonymous coding | 30% |
| MM12T | VWA5B2  | von Willebrand factor A domain containing 5B2         | NM_138345       | chr3_183955183-183955183_G_A  | 568R>Q  | Substitution | Nonsynonymous coding | 33% |
| MM12T | VWA5B2  | von Willebrand factor A domain containing 5B2         | NM_138345       | chr3_183956420-183956420_G_A  | 654R>H  | Substitution | Nonsynonymous coding | 14% |
| MM12T | VWA7    | von Willebrand factor A domain containing 7           | CCDS4721.2      | chr6_31735243-31735243_C_T    | 562R>H  | Substitution | Nonsynonymous coding | 10% |
| MM12T | VWA7    | von Willebrand factor A domain containing 7           | CCDS4721.2      | chr6_31737572-31737572_G_A    | ISV-4>  | Substitution | Splice site acceptor | 46% |
| MM12T | VWA8    | von Willebrand factor A domain containing 8           | CCDS41881.1     | chr13_42264313-42264313_C_T   | 1322G>E | Substitution | Nonsynonymous coding | 26% |
| MM12T | VWC2    | von Willebrand factor C domain containing 2           | CCDS5508.1      | chr7_49815623-49815623_C_T    | 198R>C  | Substitution | Nonsynonymous coding | 10% |
| MM12T | VWF     | von Willebrand factor                                 | CCDS8539.1      | chr12_6094249-6094249_C_T     | 2313R>H | Substitution | Nonsynonymous coding | 20% |
| MM12T | WAPAL   | wings apart-like homolog (Drosophila)                 | CCDS7375.1      | chr10_88230805-88230805_C_A   | 696A>S  | Substitution | Nonsynonymous coding | 41% |
| MM12T | WARS    | tryptophanyl-tRNA synthetase                          | CCDS9960.1      | chr14_100801237-100801237_C_T | 464R>Q  | Substitution | Nonsynonymous coding | 27% |
| MM12T | WBSCR27 | Williams Beuren syndrome chromosome region 27         | CCDS5561.1      | chr7_73249123-73249123_C_T    | 230A>T  | Substitution | Nonsynonymous coding | 34% |
| MM12T | WDFY3   | WD repeat and FYVE domain containing 3                | CCDS3609.1      | chr4_85634384-85634384_G_A    | 2657A>V | Substitution | Nonsynonymous coding | 38% |
| MM12T | WDFY3   | WD repeat and FYVE domain containing 3                | CCDS3609.1      | chr4_85711022-85711022_G_A    | 1176L>F | Substitution | Nonsynonymous coding | 11% |
| MM12T | WDFY4   | WDFY family member 4                                  | CCDS44385.1     | chr10_49986761-49986761_C_T   | 1094T>M | Substitution | Nonsynonymous coding | 31% |
| MM12T | WDFY4   | WDFY family member 4                                  | ENST00000416831 | chr10_50031236-50031236_C_T   | 526P>S  | Substitution | Nonsynonymous coding | 45% |

|       |         |                                                                               |                 |                               |         |              |                      |     |
|-------|---------|-------------------------------------------------------------------------------|-----------------|-------------------------------|---------|--------------|----------------------|-----|
| MM12T | WDFY4   | WDFY family member 4                                                          | CCDS44385.1     | chr10_49994884-49994884_T_G   | 1259Y>X | Substitution | Nonsense             | 25% |
| MM12T | WDR11   | WD repeat domain 11                                                           | CCDS7619.1      | chr10_122662563-122662563_C_T | ISV-4>  | Substitution | Splice site acceptor | 39% |
| MM12T | WDR20   | WD repeat domain 20                                                           | CCDS9968.1      | chr14_102675733-102675733_C_T | 409P>L  | Substitution | Nonsynonymous coding | 30% |
| MM12T | WDR24   | WD repeat domain 24                                                           | CCDS10420.1     | chr16_735343-735343_C_T       | 645A>T  | Substitution | Nonsynonymous coding | 29% |
| MM12T | WDR3    | WD repeat domain 3                                                            | CCDS898.1       | chr1_118476060-118476060_G_A  | 40A>T   | Substitution | Nonsynonymous coding | 13% |
| MM12T | WDR3    | WD repeat domain 3                                                            | CCDS898.1       | chr1_118497237-118497237_A_G  | 799Y>C  | Substitution | Nonsynonymous coding | 28% |
| MM12T | WDR43   | WD repeat domain 43                                                           | CCDS46251.1     | chr2_29160863-29160863_G_A    | ISV+3>  | Substitution | Splice site donor    | 30% |
| MM12T | WDR55   | WD repeat domain 55                                                           | CCDS4235.1      | chr5_140049199-140049199_C_A  | 371A>D  | Substitution | Nonsynonymous coding | 12% |
| MM12T | WDR59   | WD repeat domain 59                                                           | CCDS32488.1     | chr16_74937943-74937943_G_A   | 590R>C  | Substitution | Nonsynonymous coding | 30% |
| MM12T | WDR59   | WD repeat domain 59                                                           | CCDS32488.1     | chr16_74972152-74972152_C_A   | 183A>S  | Substitution | Nonsynonymous coding | 27% |
| MM12T | WDR6    | WD repeat domain 6                                                            | CCDS2782.2      | chr3_49049535-49049535_G_A    | 220A>T  | Substitution | Nonsynonymous coding | 19% |
| MM12T | WDR66   | WD repeat domain 66                                                           | CCDS41853.1     | chr12_122441654-122441654_G_A | 1145G>D | Substitution | Nonsynonymous coding | 14% |
| MM12T | WDR69   | WD repeat domain 69                                                           | CCDS2470.1      | chr2_228786245-228786245_C_T  | 394A>V  | Substitution | Nonsynonymous coding | 39% |
| MM12T | WDR72   | WD repeat domain 72                                                           | CCDS10151.1     | chr15_53998211-53998211_C_T   | 339V>I  | Substitution | Nonsynonymous coding | 10% |
| MM12T | WDR74   | WD repeat domain 74                                                           | ENST00000453708 | chr11_62603127-62603127_T_C   | 186R>G  | Substitution | Nonsynonymous coding | 34% |
| MM12T | WDR81   | WD repeat domain 81                                                           | NM_001163809    | chr17_1629452-1629452_G_A     | 400R>H  | Substitution | Nonsynonymous coding | 12% |
| MM12T | WDR83   | WD repeat domain 83                                                           | CCDS12275.1     | chr19_12784068-12784068_C_T   | 246R>C  | Substitution | Nonsynonymous coding | 24% |
| MM12T | WDR86   | WD repeat domain 86                                                           | CCDS5925.2      | chr7_151078732-151078732_C_T  | 356R>H  | Substitution | Nonsynonymous coding | 19% |
| MM12T | WDR86   | WD repeat domain 86                                                           | CCDS5925.2      | chr7_151092903-151092903_G_A  | 229R>W  | Substitution | Nonsynonymous coding | 35% |
| MM12T | WDR90   | WD repeat domain 90                                                           | CCDS42092.1     | chr16_710091-710091_G_A       | 1073R>H | Substitution | Nonsynonymous coding | 12% |
| MM12T | WDR96   | WD repeat domain 96                                                           | CCDS31281.1     | chr10_105924013-105924013_C_T | 1029A>T | Substitution | Nonsynonymous coding | 33% |
| MM12T | WDR96   | WD repeat domain 96                                                           | CCDS31281.1     | chr10_105928513-105928513_G_A | 894R>X  | Substitution | Nonsense             | 11% |
| MM12T | WEE2    | WEE1 homolog 2 (S. pombe)                                                     | CCDS43660.1     | chr7_141424004-141424004_G_A  | 384A>T  | Substitution | Nonsynonymous coding | 13% |
| MM12T | WFIKKN1 | WAP, follistatin/kazal, immunoglobulin, kunitz and netrin domain containing 1 | CCDS10414.1     | chr16_683672-683672_G_A       | 421R>H  | Substitution | Nonsynonymous coding | 32% |
| MM12T | WFIKKN2 | WAP, follistatin/kazal, immunoglobulin, kunitz and netrin domain containing 2 | CCDS11575.1     | chr17_48918256-48918256_G_A   | 536G>D  | Substitution | Nonsynonymous coding | 16% |
| MM12T | WFS1    | Wolfram syndrome 1 (wolframin)                                                | CCDS3386.1      | chr4_6290744-6290744_G_A      | 116D>N  | Substitution | Nonsynonymous coding | 10% |
| MM12T | WFS1    | Wolfram syndrome 1 (wolframin)                                                | CCDS3386.1      | chr4_6304124-6304124_C_T      | 868R>C  | Substitution | Nonsynonymous coding | 32% |
| MM12T | WHSC1   | Wolf-Hirschhorn syndrome candidate 1                                          | CCDS33940.1     | chr4_1902658-1902658_G_A      | 93A>T   | Substitution | Nonsynonymous coding | 22% |
| MM12T | WHSC1   | Wolf-Hirschhorn syndrome candidate 1                                          | CCDS33940.1     | chr4_1957714-1957714_T_C      | 894W>R  | Substitution | Nonsynonymous coding | 45% |
| MM12T | WHSC1   | Wolf-Hirschhorn syndrome candidate 1                                          | CCDS33940.1     | chr4_1980581-1980581_C_T      | 1348P>L | Substitution | Nonsynonymous coding | 10% |
| MM12T | WIPF1   | WAS/WASL interacting protein family, member 1                                 | CCDS2260.1      | chr2_175427303-175427303_G_A  | 495A>V  | Substitution | Nonsynonymous coding | 35% |
| MM12T | WIP2    | WD repeat domain, phosphoinositide interacting 2                              | CCDS5339.1      | chr7_5239239-5239239_A_G      | 54K>R   | Substitution | Nonsynonymous coding | 29% |

|       |         |                                                                        |                 |                              |         |              |                      |     |
|-------|---------|------------------------------------------------------------------------|-----------------|------------------------------|---------|--------------|----------------------|-----|
| MM12T | WIZ     | widely interspaced zinc finger motifs                                  | CCDS42516.1     | chr19_15536559-15536559_G_A  | 368R>C  | Substitution | Nonsynonymous coding | 10% |
| MM12T | WNK1    | WNK lysine deficient protein kinase 1                                  | CCDS8506.1      | chr12_1017928-1017928_C_     | NA      | Deletion     | Frameshift           | 29% |
| MM12T | WNK2    | WNK lysine deficient protein kinase 2                                  | NM_006648       | chr9_96061481-96061481_C_T   | 2018A>V | Substitution | Nonsynonymous coding | 27% |
| MM12T | WNK3    | WNK lysine deficient protein kinase 3                                  | CCDS14357.1     | chrX_54263780-54263780_T_C   | 1407K>E | Substitution | Nonsynonymous coding | 30% |
| MM12T | WNK3    | WNK lysine deficient protein kinase 3                                  | CCDS14357.1     | chrX_54224999-54224999_C_A   | 1721G>X | Substitution | Nonsense             | 36% |
| MM12T | WNK4    | WNK lysine deficient protein kinase 4                                  | CCDS11439.1     | chr17_40947694-40947694_C_T  | 1025P>L | Substitution | Nonsynonymous coding | 36% |
| MM12T | WNT2B   | wingless-type MMTV integration site family, member 2B                  | CCDS847.1       | chr1_113059807-113059807_G_A | 249R>H  | Substitution | Nonsynonymous coding | 31% |
| MM12T | WNT4    | wingless-type MMTV integration site family, member 4                   | CCDS223.1       | chr1_22446993-22446993_C_T   | 202M>I  | Substitution | Nonsynonymous coding | 35% |
| MM12T | WNT5A   | wingless-type MMTV integration site family, member 5A                  | CCDS46850.1     | chr3_55508450-55508450_C_T   | 200R>H  | Substitution | Nonsynonymous coding | 29% |
| MM12T | WNT5A   | wingless-type MMTV integration site family, member 5A                  | CCDS46850.1     | chr3_55508622-55508622_C_T   | 143A>T  | Substitution | Nonsynonymous coding | 13% |
| MM12T | WNT5A   | wingless-type MMTV integration site family, member 5A                  | CCDS46850.1     | chr3_55513543-55513543_C_T   | 64G>R   | Substitution | Nonsynonymous coding | 14% |
| MM12T | WNT9A   | wingless-type MMTV integration site family, member 9A                  | CCDS31045.1     | chr1_228109463-228109463_C_T | 285R>H  | Substitution | Nonsynonymous coding | 38% |
| MM12T | WRN     | Werner syndrome, RecQ helicase-like                                    | CCDS6082.1      | chr8_30999014-30999014_G_T   | 1012E>D | Substitution | Nonsynonymous coding | 28% |
| MM12T | WWC2    | WW and C2 domain containing 2                                          | CCDS34109.2     | chr4_184182656-184182656_C_A | 627A>D  | Substitution | Nonsynonymous coding | 11% |
| MM12T | WWC3    | WWC family member 3                                                    | CCDS14136.1     | chrX_10085597-10085597_C_T   | 500R>W  | Substitution | Nonsynonymous coding | 17% |
| MM12T | WWC3    | WWC family member 3                                                    | CCDS14136.1     | chrX_10090683-10090683_C_A   | 552A>D  | Substitution | Nonsynonymous coding | 13% |
| MM12T | WWC3    | WWC family member 3                                                    | CCDS14136.1     | chrX_10085366-10085366_C_T   | 423R>X  | Substitution | Nonsense             | 24% |
| MM12T | WWP2    | WW domain containing E3 ubiquitin protein ligase 2                     | CCDS10885.1     | chr16_69959337-69959337_C_T  | 395S>L  | Substitution | Nonsynonymous coding | 32% |
| MM12T | XDH     | xanthine dehydrogenase                                                 | CCDS1775.1      | chr2_31562359-31562359_G_A   | 1257S>L | Substitution | Nonsynonymous coding | 16% |
| MM12T | XDH     | xanthine dehydrogenase                                                 | CCDS1775.1      | chr2_31589857-31589857_T_C   | 734E>G  | Substitution | Nonsynonymous coding | 36% |
| MM12T | XDH     | xanthine dehydrogenase                                                 | CCDS1775.1      | chr2_31610723-31610723_G_A   | 202T>M  | Substitution | Nonsynonymous coding | 23% |
| MM12T | XIRP1   | xin actin-binding repeat containing 1                                  | CCDS2683.1      | chr3_39230597-39230597_C_T   | 114A>T  | Substitution | Nonsynonymous coding | 11% |
| MM12T | XIRP1   | xin actin-binding repeat containing 1                                  | CCDS2683.1      | chr3_39230840-39230840_G_T   | 33L>M   | Substitution | Nonsynonymous coding | 38% |
| MM12T | XIRP2   | xin actin-binding repeat containing 2                                  | CCDS42769.1     | chr2_168100601-168100601_C_A | 900T>N  | Substitution | Nonsynonymous coding | 25% |
| MM12T | XKR3    | XK, Kell blood group complex subunit-related family, member 3          | CCDS42975.1     | chr22_17265116-17265116_G_A  | 258A>V  | Substitution | Nonsynonymous coding | 42% |
| MM12T | XKR5    | XK, Kell blood group complex subunit-related family, member 5          | ENST00000409172 | chr8_6669684-6669684_C_A     | 365G>W  | Substitution | Nonsynonymous coding | 29% |
| MM12T | XPNPEP2 | X-prolyl aminopeptidase (aminopeptidase P) 2, membrane-bound           | CCDS14613.1     | chrX_128884528-128884528_C_T | 241A>V  | Substitution | Nonsynonymous coding | 17% |
| MM12T | XPO4    | exportin 4                                                             | CCDS41872.1     | chr13_21375038-21375038_C_A  | 637D>Y  | Substitution | Nonsynonymous coding | 12% |
| MM12T | XPO4    | exportin 4                                                             | CCDS41872.1     | chr13_21442745-21442745_C_A  | 55K>N   | Substitution | Nonsynonymous coding | 16% |
| MM12T | XRCC2   | X-ray repair complementing defective repair in Chinese hamster cells 2 | CCDS5933.1      | chr7_152346063-152346063_C_A | 169Q>H  | Substitution | Nonsynonymous coding | 23% |
| MM12T | XXYL1   | xyloside xylosyltransferase 1                                          | CCDS43188.1     | chr3_194947462-194947462_C_T | 210A>T  | Substitution | Nonsynonymous coding | 44% |
| MM12T | XYLT1   | xylosyltransferase I                                                   | CCDS10569.1     | chr16_17564622-17564622_G_A  | 11A>V   | Substitution | Nonsynonymous coding | 23% |

|       |         |                                                          |             |                               |         |              |                      |     |
|-------|---------|----------------------------------------------------------|-------------|-------------------------------|---------|--------------|----------------------|-----|
| MM12T | YAP1    | Yes-associated protein 1                                 | CCDS44716.1 | chr11_102076651-102076651_C_A | 277A>D  | Substitution | Nonsynonymous coding | 19% |
| MM12T | YARS2   | tyrosyl-tRNA synthetase 2, mitochondrial                 | CCDS31770.1 | chr12_32903729-32903729_G_A   | 343R>W  | Substitution | Nonsynonymous coding | 17% |
| MM12T | YBX2    | Y box binding protein 2                                  | CCDS11098.1 | chr17_7195359-7195359_C_T     | 119V>I  | Substitution | Nonsynonymous coding | 24% |
| MM12T | YOD1    | YOD1 OTU deubiquinating enzyme 1 homolog (S. cerevisiae) | CCDS31002.1 | chr1_207222988-207222988_C_T  | 142V>I  | Substitution | Nonsynonymous coding | 25% |
| MM12T | YPEL1   | yippee-like 1 (Drosophila)                               | CCDS13794.1 | chr22_22057711-22057711_G_A   | 73A>V   | Substitution | Nonsynonymous coding | 10% |
| MM12T | YTHDF2  | YTH domain family, member 2                              | CCDS41296.1 | chr1_29069426-29069426_C_T    | 215S>F  | Substitution | Nonsynonymous coding | 15% |
| MM12T | YY1     | YY1 transcription factor                                 | CCDS9957.1  | chr14_100728730-100728730_G_A | 257G>R  | Substitution | Nonsynonymous coding | 11% |
| MM12T | YY2     | YY2 transcription factor                                 | CCDS14202.1 | chrX_21875564-21875564_G_A    | 321R>H  | Substitution | Nonsynonymous coding | 28% |
| MM12T | ZBED3   | zinc finger, BED-type containing 3                       | CCDS4036.1  | chr5_76373576-76373576_G_A    | 43A>V   | Substitution | Nonsynonymous coding | 15% |
| MM12T | ZBED4   | zinc finger, BED-type containing 4                       | CCDS33677.1 | chr22_50279276-50279276_A_    | NA      | Deletion     | Frameshift           | 12% |
| MM12T | ZBTB1   | zinc finger and BTB domain containing 1                  | CCDS45126.1 | chr14_64989156-64989156_G_A   | 312A>T  | Substitution | Nonsynonymous coding | 33% |
| MM12T | ZBTB1   | zinc finger and BTB domain containing 1                  | CCDS45126.1 | chr14_64990218-64990218_G_C   | 666V>L  | Substitution | Nonsynonymous coding | 32% |
| MM12T | ZBTB16  | zinc finger and BTB domain containing 16                 | CCDS8367.1  | chr11_114112982-114112982_G_A | 516R>H  | Substitution | Nonsynonymous coding | 32% |
| MM12T | ZBTB17  | zinc finger and BTB domain containing 17                 | CCDS165.1   | chr1_16268898-16268898_C_T    | 686A>T  | Substitution | Nonsynonymous coding | 31% |
| MM12T | ZBTB17  | zinc finger and BTB domain containing 17                 | CCDS165.1   | chr1_16269201-16269201_G_A    | 621R>C  | Substitution | Nonsynonymous coding | 36% |
| MM12T | ZBTB20  | zinc finger and BTB domain containing 20                 | CCDS2981.1  | chr3_114058003-114058003_G_   | NA      | Deletion     | Frameshift           | 24% |
| MM12T | ZBTB20  | zinc finger and BTB domain containing 20                 | CCDS2981.1  | chr3_114069198-114069198_T    | NA      | Insertion    | Frameshift           | 24% |
| MM12T | ZBTB20  | zinc finger and BTB domain containing 20                 | CCDS2981.1  | chr3_114069181-114069181_G_A  | 509L>F  | Substitution | Nonsynonymous coding | 34% |
| MM12T | ZBTB3   | zinc finger and BTB domain containing 3                  | CCDS8034.1  | chr11_62520686-62520686_G_A   | 201R>C  | Substitution | Nonsynonymous coding | 29% |
| MM12T | ZBTB32  | zinc finger and BTB domain containing 32                 | CCDS12471.1 | chr19_36205815-36205815_C_T   | 96A>V   | Substitution | Nonsynonymous coding | 26% |
| MM12T | ZBTB33  | zinc finger and BTB domain containing 33                 | CCDS14596.1 | chrX_119387313-119387313_T_C  | 15S>P   | Substitution | Nonsynonymous coding | 31% |
| MM12T | ZBTB38  | zinc finger and BTB domain containing 38                 | CCDS43157.1 | chr3_141163434-141163434_C_T  | 735A>V  | Substitution | Nonsynonymous coding | 13% |
| MM12T | ZBTB44  | zinc finger and BTB domain containing 44                 | CCDS44776.1 | chr11_130131584-130131584_C_T | 62G>D   | Substitution | Nonsynonymous coding | 23% |
| MM12T | ZBTB7A  | zinc finger and BTB domain containing 7A                 | CCDS12119.1 | chr19_4047913-4047913_C_T     | 531R>H  | Substitution | Nonsynonymous coding | 31% |
| MM12T | ZBTB8A  | zinc finger and BTB domain containing 8A                 | CCDS30664.1 | chr1_33058626-33058626_G_T    | 32G>W   | Substitution | Nonsynonymous coding | 21% |
| MM12T | ZBTB8B  | zinc finger and BTB domain containing 8B                 | CCDS44104.1 | chr1_32937025-32937025_C_T    | 267A>V  | Substitution | Nonsynonymous coding | 24% |
| MM12T | ZC3H13  | zinc finger CCCH-type containing 13                      | CCDS9400.1  | chr13_46559465-46559465_T_C   | 563S>G  | Substitution | Nonsynonymous coding | 11% |
| MM12T | ZC3H4   | zinc finger CCCH-type containing 4                       | CCDS42582.1 | chr19_47571000-47571000_C_T   | 842S>N  | Substitution | Nonsynonymous coding | 27% |
| MM12T | ZC3H6   | zinc finger CCCH-type containing 6                       | CCDS46393.1 | chr2_113089907-113089907_A_G  | 1138T>A | Substitution | Nonsynonymous coding | 37% |
| MM12T | ZC3H7A  | zinc finger CCCH-type containing 7A                      | CCDS10550.1 | chr16_11857466-11857466_G_A   | 624R>C  | Substitution | Nonsynonymous coding | 33% |
| MM12T | ZC3HAV1 | zinc finger CCCH-type, antiviral 1                       | CCDS5851.1  | chr7_138764711-138764711_T_G  | 326T>P  | Substitution | Nonsynonymous coding | 35% |
| MM12T | ZCCHC14 | zinc finger, CCHC domain containing 14                   | CCDS10961.1 | chr16_87446661-87446661_G_A   | 445R>C  | Substitution | Nonsynonymous coding | 30% |

|       |         |                                           |             |                               |         |              |                      |     |
|-------|---------|-------------------------------------------|-------------|-------------------------------|---------|--------------|----------------------|-----|
| MM12T | ZCCH5   | zinc finger, CCHC domain containing 5     | CCDS14440.1 | chrX_77913136-77913136_T_C    | 261Y>C  | Substitution | Nonsynonymous coding | 12% |
| MM12T | ZCCH8   | zinc finger, CCHC domain containing 8     | NM_017612   | chr12_122958288-122958288_C_T | 627G>D  | Substitution | Nonsynonymous coding | 12% |
| MM12T | ZDBF2   | zinc finger, DBF-type containing 2        | CCDS46501.1 | chr2_207171048-207171048_C_T  | 599T>I  | Substitution | Nonsynonymous coding | 41% |
| MM12T | ZDBF2   | zinc finger, DBF-type containing 2        | CCDS46501.1 | chr2_207174069-207174069_G_A  | 1606R>Q | Substitution | Nonsynonymous coding | 13% |
| MM12T | ZDBF2   | zinc finger, DBF-type containing 2        | CCDS46501.1 | chr2_207174748-207174748_G_T  | 1832W>C | Substitution | Nonsynonymous coding | 15% |
| MM12T | ZDHHC20 | zinc finger, DHHC-type containing 20      | CCDS45017.1 | chr13_22033193-22033193_A_G   | 40F>L   | Substitution | Nonsynonymous coding | 27% |
| MM12T | ZEB2    | zinc finger E-box binding homeobox 2      | CCDS2186.1  | chr2_145187573-145187573_C_T  | 32V>M   | Substitution | Nonsynonymous coding | 26% |
| MM12T | ZFAT    | zinc finger and AT hook domain containing | CCDS47924.1 | chr8_135614731-135614731_G_A  | 411R>C  | Substitution | Nonsynonymous coding | 32% |
| MM12T | ZFC3H1  | zinc finger, C3H1-type containing         | CCDS41813.1 | chr12_72024433-72024433_G_T   | 1224S>Y | Substitution | Nonsynonymous coding | 23% |
| MM12T | ZFC3H1  | zinc finger, C3H1-type containing         | CCDS41813.1 | chr12_72038712-72038712_C_A   | 408Q>H  | Substitution | Nonsynonymous coding | 21% |
| MM12T | ZFC3H1  | zinc finger, C3H1-type containing         | CCDS41813.1 | chr12_72038713-72038713_T_A   | 408Q>L  | Substitution | Nonsynonymous coding | 20% |
| MM12T | ZFC3H1  | zinc finger, C3H1-type containing         | CCDS41813.1 | chr12_72038714-72038714_G_T   | 408Q>K  | Substitution | Nonsynonymous coding | 20% |
| MM12T | ZFH3    | zinc finger homeobox 3                    | CCDS10908.1 | chr16_72827372-72827372_G_A   | 3070A>V | Substitution | Nonsynonymous coding | 33% |
| MM12T | ZFH3    | zinc finger homeobox 3                    | CCDS10908.1 | chr16_72993288-72993288_T_G   | 253S>R  | Substitution | Nonsynonymous coding | 36% |
| MM12T | ZFH3    | zinc finger homeobox 3                    | CCDS10908.1 | chr16_72993925-72993925_C_A   | 40E>D   | Substitution | Nonsynonymous coding | 12% |
| MM12T | ZFH4    | zinc finger homeobox 4                    | CCDS47878.1 | chr8_77619946-77619946_C_T    | 893A>V  | Substitution | Nonsynonymous coding | 12% |
| MM12T | ZFH4    | zinc finger homeobox 4                    | CCDS47878.1 | chr8_77762550-77762550_C_T    | 1261R>W | Substitution | Nonsynonymous coding | 12% |
| MM12T | ZFH4    | zinc finger homeobox 4                    | CCDS47878.1 | chr8_77766705-77766705_C_A    | 2471F>L | Substitution | Nonsynonymous coding | 38% |
| MM12T | ZFH4    | zinc finger homeobox 4                    | CCDS47878.1 | chr8_77768414-77768414_G_A    | 3041S>N | Substitution | Nonsynonymous coding | 31% |
| MM12T | ZFH4    | zinc finger homeobox 4                    | CCDS47878.1 | chr8_77776779-77776779_G_A    | 3565R>Q | Substitution | Nonsynonymous coding | 42% |
| MM12T | ZFP28   | ZFP28 zinc finger protein                 | CCDS12946.1 | chr19_57065632-57065632_G_A   | 493R>H  | Substitution | Nonsynonymous coding | 32% |
| MM12T | ZFP64   | ZFP64 zinc finger protein                 | CCDS13440.1 | chr20_50781299-50781299__A    | NA      | Insertion    | Splice site acceptor | 37% |
| MM12T | ZFP82   | ZFP82 zinc finger protein                 | CCDS12493.1 | chr19_36884085-36884085_C_A   | 386R>I  | Substitution | Nonsynonymous coding | 21% |
| MM12T | ZFP82   | ZFP82 zinc finger protein                 | CCDS12493.1 | chr19_36884291-36884291_C_A   | 317K>N  | Substitution | Nonsynonymous coding | 37% |
| MM12T | ZFPM1   | zinc finger protein, FOG family member 1  | CCDS32502.1 | chr16_88552448-88552448_G_A   | 48A>T   | Substitution | Nonsynonymous coding | 41% |
| MM12T | ZFPM2   | zinc finger protein, FOG family member 2  | CCDS47908.1 | chr8_106801017-106801017_T_G  | 202F>V  | Substitution | Nonsynonymous coding | 30% |
| MM12T | ZFPM2   | zinc finger protein, FOG family member 2  | CCDS47908.1 | chr8_106815470-106815470_C_T  | 1054P>S | Substitution | Nonsynonymous coding | 12% |
| MM12T | ZFR2    | zinc finger RNA binding protein 2         | CCDS45921.1 | chr19_3831531-3831531_C_T     | 208A>T  | Substitution | Nonsynonymous coding | 25% |
| MM12T | ZFYVE1  | zinc finger, FYVE domain containing 1     | CCDS9811.1  | chr14_73490873-73490873_C_A   | 115R>I  | Substitution | Nonsynonymous coding | 17% |
| MM12T | ZFYVE26 | zinc finger, FYVE domain containing 26    | CCDS9788.1  | chr14_68233074-68233074_G_A   | 1961L>F | Substitution | Nonsynonymous coding | 32% |
| MM12T | ZFYVE27 | zinc finger, FYVE domain containing 27    | CCDS31262.1 | chr10_99512845-99512845_G_T   | 321Q>H  | Substitution | Nonsynonymous coding | 32% |
| MM12T | ZFYVE9  | zinc finger, FYVE domain containing 9     | CCDS563.1   | chr1_52704262-52704262_G_T    | 391E>D  | Substitution | Nonsynonymous coding | 35% |

|       |        |                                  |                |                              |         |              |                      |     |
|-------|--------|----------------------------------|----------------|------------------------------|---------|--------------|----------------------|-----|
| MM12T | ZGLP1  | zinc finger, GATA-like protein 1 | CCDS45959.1    | chr19_10419192-10419192_C_T  | 56A>T   | Substitution | Nonsynonymous coding | 26% |
| MM12T | ZIC1   | Zic family member 1              | CCDS3136.1     | chr3_147128293-147128293_C_T | 132H>Y  | Substitution | Nonsynonymous coding | 44% |
| MM12T | ZIC3   | Zic family member 3              | CCDS14663.1    | chrX_136649495-136649495_G_T | 215Q>H  | Substitution | Nonsynonymous coding | 29% |
| MM12T | ZIC3   | Zic family member 3              | CCDS14663.1    | chrX_136649559-136649559_G_A | 237G>S  | Substitution | Nonsynonymous coding | 33% |
| MM12T | ZIC3   | Zic family member 3              | CCDS14663.1    | chrX_136649580-136649580_C_T | 244R>W  | Substitution | Nonsynonymous coding | 35% |
| MM12T | ZMAT5  | zinc finger, matrin-type 5       | CCDS13868.1    | chr22_30136711-30136711_C_T  | 67D>N   | Substitution | Nonsynonymous coding | 36% |
| MM12T | ZMYM3  | zinc finger, MYM-type 3          | CCDS14409.1    | chrX_70470303-70470303_T_    | NA      | Deletion     | Frameshift           | 29% |
| MM12T | ZMYM3  | zinc finger, MYM-type 3          | CCDS14409.1    | chrX_70461141-70461141_G_A   | 1286R>C | Substitution | Nonsynonymous coding | 14% |
| MM12T | ZMYM3  | zinc finger, MYM-type 3          | CCDS14409.1    | chrX_70462110-70462110_G_A   | 1238R>W | Substitution | Nonsynonymous coding | 39% |
| MM12T | ZMYM3  | zinc finger, MYM-type 3          | CCDS14409.1    | chrX_70466442-70466442_G_A   | ISV+3>  | Substitution | Splice site donor    | 28% |
| MM12T | ZMYM6  | zinc finger, MYM-type 6          | CCDS387.2      | chr1_35457837-35457837_G_A   | 715T>I  | Substitution | Nonsynonymous coding | 35% |
| MM12T | ZNF101 | zinc finger protein 101          | CCDS32971.1    | chr19_19789582-19789582_G_A  | 60G>R   | Substitution | Nonsynonymous coding | 24% |
| MM12T | ZNF106 | zinc finger protein 106          | CCDS32208.1    | chr15_42742022-42742022_C_A  | 793Q>H  | Substitution | Nonsynonymous coding | 31% |
| MM12T | ZNF124 | zinc finger protein 124          | CCDS31089.1    | chr1_247319871-247319871_C_T | 289M>I  | Substitution | Nonsynonymous coding | 21% |
| MM12T | ZNF124 | zinc finger protein 124          | ENST0000366499 | chr1_247320641-247320641_T_A | 56T>S   | Substitution | Nonsynonymous coding | 17% |
| MM12T | ZNF131 | zinc finger protein 131          | CCDS43313.1    | chr5_43161532-43161532_G_A   | 185E>K  | Substitution | Nonsynonymous coding | 15% |
| MM12T | ZNF135 | zinc finger protein 135          | CCDS12970.1    | chr19_58578434-58578434_A_   | NA      | Deletion     | Frameshift           | 25% |
| MM12T | ZNF142 | zinc finger protein 142          | CCDS42817.1    | chr2_219507509-219507509_G_A | 1244R>C | Substitution | Nonsynonymous coding | 13% |
| MM12T | ZNF16  | zinc finger protein 16           | CCDS6437.1     | chr8_146157749-146157749_C_T | 142G>R  | Substitution | Nonsynonymous coding | 37% |
| MM12T | ZNF17  | zinc finger protein 17           | CCDS42636.1    | chr19_57929276-57929276_G_A  | ISV-4>  | Substitution | Splice site acceptor | 35% |
| MM12T | ZNF18  | zinc finger protein 18           | CCDS32568.1    | chr17_11895766-11895766_C_T  | 127W>X  | Substitution | Nonsense             | 16% |
| MM12T | ZNF180 | zinc finger protein 180          | CCDS12639.1    | chr19_44980761-44980761_G_A  | 646A>V  | Substitution | Nonsynonymous coding | 14% |
| MM12T | ZNF197 | zinc finger protein 197          | CCDS2717.1     | chr3_44684045-44684045_C_T   | 475R>C  | Substitution | Nonsynonymous coding | 26% |
| MM12T | ZNF2   | zinc finger protein 2            | NM_021088      | chr2_95847297-95847297_C_T   | 242R>C  | Substitution | Nonsynonymous coding | 28% |
| MM12T | ZNF211 | zinc finger protein 211          | CCDS12956.1    | chr19_58152510-58152510_C_T  | 232A>V  | Substitution | Nonsynonymous coding | 44% |
| MM12T | ZNF214 | zinc finger protein 214          | CCDS31418.1    | chr11_7021892-7021892_C_A    | 341R>I  | Substitution | Nonsynonymous coding | 14% |
| MM12T | ZNF219 | zinc finger protein 219          | CCDS9568.1     | chr14_21560303-21560303_G_A  | 385R>X  | Substitution | Nonsense             | 12% |
| MM12T | ZNF235 | zinc finger protein 235          | CCDS33048.1    | chr19_44792330-44792330_C_T  | 420A>T  | Substitution | Nonsynonymous coding | 13% |
| MM12T | ZNF236 | zinc finger protein 236          | CCDS42447.1    | chr18_74622087-74622087_C_A  | 870P>H  | Substitution | Nonsynonymous coding | 31% |
| MM12T | ZNF264 | zinc finger protein 264          | CCDS33127.1    | chr19_57723880-57723880_G_A  | 472R>H  | Substitution | Nonsynonymous coding | 28% |
| MM12T | ZNF267 | zinc finger protein 267          | CCDS32440.1    | chr16_31926606-31926606_G_A  | 346E>K  | Substitution | Nonsynonymous coding | 21% |
| MM12T | ZNF276 | zinc finger protein 276          | CCDS45554.1    | chr16_89800423-89800423_G_A  | 484R>H  | Substitution | Nonsynonymous coding | 32% |

|       |         |                          |              |                              |         |              |                      |     |
|-------|---------|--------------------------|--------------|------------------------------|---------|--------------|----------------------|-----|
| MM12T | ZNF277  | zinc finger protein 277  | CCDS5755.2   | chr7_111981105-111981105_C_T | ISV+4>  | Substitution | Splice site donor    | 11% |
| MM12T | ZNF280A | zinc finger protein 280A | CCDS13800.1  | chr22_22868772-22868772_C_T  | 395V>M  | Substitution | Nonsynonymous coding | 42% |
| MM12T | ZNF280C | zinc finger protein 280C | CCDS14622.1  | chrX_129370292-129370292_T_C | 223T>A  | Substitution | Nonsynonymous coding | 25% |
| MM12T | ZNF280D | zinc finger protein 280D | CCDS32245.1  | chr15_56923854-56923854_C_T  | 928E>K  | Substitution | Nonsynonymous coding | 25% |
| MM12T | ZNF280D | zinc finger protein 280D | CCDS32245.1  | chr15_56974531-56974531_C_A  | 309G>X  | Substitution | Nonsense             | 25% |
| MM12T | ZNF282  | zinc finger protein 282  | CCDS5895.1   | chr7_148907707-148907707_C_T | 288A>V  | Substitution | Nonsynonymous coding | 22% |
| MM12T | ZNF283  | zinc finger protein 283  | CCDS46097.1  | chr19_44351661-44351661_G_A  | 303G>D  | Substitution | Nonsynonymous coding | 25% |
| MM12T | ZNF283  | zinc finger protein 283  | CCDS46097.1  | chr19_44351871-44351871_A_C  | 373K>T  | Substitution | Nonsynonymous coding | 27% |
| MM12T | ZNF286A | zinc finger protein 286A | CCDS11172.1  | chr17_15609780-15609780_T_C  | 69V>A   | Substitution | Nonsynonymous coding | 21% |
| MM12T | ZNF300  | zinc finger protein 300  | NM_052860    | chr5_150276021-150276021_C_A | 260Q>H  | Substitution | Nonsynonymous coding | 28% |
| MM12T | ZNF304  | zinc finger protein 304  | CCDS12950.1  | chr19_57868910-57868910_C_A  | 558P>H  | Substitution | Nonsynonymous coding | 34% |
| MM12T | ZNF317  | zinc finger protein 317  | CCDS12210.1  | chr19_9271409-9271409_C_T    | 363A>V  | Substitution | Nonsynonymous coding | 12% |
| MM12T | ZNF318  | zinc finger protein 318  | CCDS4895.2   | chr6_43322625-43322625_G_A   | 816P>L  | Substitution | Nonsynonymous coding | 48% |
| MM12T | ZNF324  | zinc finger protein 324  | CCDS12981.1  | chr19_58982124-58982124_G_T  | 89D>Y   | Substitution | Nonsynonymous coding | 35% |
| MM12T | ZNF324  | zinc finger protein 324  | CCDS12981.1  | chr19_58982773-58982773_G_A  | 305R>H  | Substitution | Nonsynonymous coding | 11% |
| MM12T | ZNF337  | zinc finger protein 337  | CCDS13174.1  | chr20_25656637-25656637_C_A  | 429E>D  | Substitution | Nonsynonymous coding | 14% |
| MM12T | ZNF33A  | zinc finger protein 33A  | CCDS44372.1  | chr10_38344125-38344125_A_C  | 358Q>P  | Substitution | Nonsynonymous coding | 23% |
| MM12T | ZNF341  | zinc finger protein 341  | CCDS13227.1  | chr20_32328780-32328780_G_A  | 35G>D   | Substitution | Nonsynonymous coding | 28% |
| MM12T | ZNF35   | zinc finger protein 35   | CCDS2718.2   | chr3_44701042-44701042_G_A   | 396G>E  | Substitution | Nonsynonymous coding | 29% |
| MM12T | ZNF358  | zinc finger protein 358  | CCDS32890.2  | chr19_7585227-7585227_C_T    | 367H>Y  | Substitution | Nonsynonymous coding | 31% |
| MM12T | ZNF365  | zinc finger protein 365  | CCDS7264.1   | chr10_64136124-64136124_C_A  | 58L>I   | Substitution | Nonsynonymous coding | 13% |
| MM12T | ZNF385B | zinc finger protein 385B | CCDS33339.1  | chr2_180383346-180383346_G_A | 139A>V  | Substitution | Nonsynonymous coding | 30% |
| MM12T | ZNF398  | zinc finger protein 398  | CCDS5894.1   | chr7_148876640-148876640_G_A | 559R>H  | Substitution | Nonsynonymous coding | 12% |
| MM12T | ZNF404  | zinc finger protein 404  | NM_001033719 | chr19_44378166-44378166_G_A  | 64A>V   | Substitution | Nonsynonymous coding | 13% |
| MM12T | ZNF414  | zinc finger protein 414  | CCDS12205.1  | chr19_8576525-8576525_C_T    | 284A>T  | Substitution | Nonsynonymous coding | 28% |
| MM12T | ZNF418  | zinc finger protein 418  | CCDS42642.1  | chr19_58438881-58438881_C_A  | 223R>I  | Substitution | Nonsynonymous coding | 29% |
| MM12T | ZNF420  | zinc finger protein 420  | CCDS12498.1  | chr19_37618319-37618319_G_T  | 142K>N  | Substitution | Nonsynonymous coding | 13% |
| MM12T | ZNF423  | zinc finger protein 423  | CCDS32445.1  | chr16_49559361-49559361_C_T  | 1208D>N | Substitution | Nonsynonymous coding | 16% |
| MM12T | ZNF423  | zinc finger protein 423  | CCDS32445.1  | chr16_49669864-49669864_C_T  | 1067A>T | Substitution | Nonsynonymous coding | 31% |
| MM12T | ZNF423  | zinc finger protein 423  | CCDS32445.1  | chr16_49670344-49670344_G_A  | 907R>W  | Substitution | Nonsynonymous coding | 31% |
| MM12T | ZNF423  | zinc finger protein 423  | CCDS32445.1  | chr16_49671985-49671985_C_T  | 360V>I  | Substitution | Nonsynonymous coding | 11% |
| MM12T | ZNF425  | zinc finger protein 425  | CCDS34773.1  | chr7_148801188-148801188_G_A | 592T>M  | Substitution | Nonsynonymous coding | 32% |

|       |            |                                     |                 |                              |         |              |                      |     |
|-------|------------|-------------------------------------|-----------------|------------------------------|---------|--------------|----------------------|-----|
| MM12T | ZNF426     | zinc finger protein 426             | CCDS12215.1     | chr19_9640313-9640313_C_A    | ISV-1>  | Substitution | Splice site acceptor | 34% |
| MM12T | ZNF426     | zinc finger protein 426             | CCDS12215.1     | chr19_9645956-9645956_C_A    | ISV-1>  | Substitution | Splice site acceptor | 13% |
| MM12T | ZNF44      | zinc finger protein 44              | CCDS45988.1     | chr19_12384679-12384679_G_A  | 131R>W  | Substitution | Nonsynonymous coding | 29% |
| MM12T | ZNF441     | zinc finger protein 441             | CCDS12266.2     | chr19_11890970-11890970_G_A  | 111V>I  | Substitution | Nonsynonymous coding | 18% |
| MM12T | ZNF446     | zinc finger protein 446             | CCDS12982.1     | chr19_58988674-58988674_G_A  | 30R>Q   | Substitution | Nonsynonymous coding | 35% |
| MM12T | ZNF462     | zinc finger protein 462             | CCDS35096.1     | chr9_109701319-109701319_C_T | 2120L>F | Substitution | Nonsynonymous coding | 31% |
| MM12T | ZNF467     | zinc finger protein 467             | CCDS5899.1      | chr7_149463011-149463011_C_T | 194G>S  | Substitution | Nonsynonymous coding | 38% |
| MM12T | ZNF474     | zinc finger protein 474             | CCDS4130.1      | chr5_121488388-121488388_T_C | 235S>P  | Substitution | Nonsynonymous coding | 28% |
| MM12T | ZNF483     | zinc finger protein 483             | CCDS35106.1     | chr9_114304071-114304071_G_A | 286A>T  | Substitution | Nonsynonymous coding | 10% |
| MM12T | ZNF483     | zinc finger protein 483             | CCDS35106.1     | chr9_114304842-114304842_C_T | 543R>X  | Substitution | Nonsense             | 37% |
| MM12T | ZNF484     | zinc finger protein 484             | CCDS35066.1     | chr9_95609920-95609920_G_T   | 383H>Q  | Substitution | Nonsynonymous coding | 17% |
| MM12T | ZNF487P    | zinc finger protein 487, pseudogene | ENST00000431662 | chr10_43971561-43971561_G_A  | 79C>Y   | Substitution | Nonsynonymous coding | 29% |
| MM12T | ZNF497     | zinc finger protein 497             | CCDS12977.1     | chr19_58867893-58867893_C_T  | 370R>H  | Substitution | Nonsynonymous coding | 24% |
| MM12T | ZNF497     | zinc finger protein 497             | CCDS12977.1     | chr19_58868037-58868037_C_T  | 322R>H  | Substitution | Nonsynonymous coding | 21% |
| MM12T | ZNF497     | zinc finger protein 497             | CCDS12977.1     | chr19_58868347-58868347_C_T  | 219E>K  | Substitution | Nonsynonymous coding | 12% |
| MM12T | ZNF497     | zinc finger protein 497             | CCDS12977.1     | chr19_58868373-58868373_C_T  | 210R>H  | Substitution | Nonsynonymous coding | 11% |
| MM12T | ZNF503     | zinc finger protein 503             | CCDS7350.1      | chr10_77158926-77158926_G_A  | 508P>S  | Substitution | Nonsynonymous coding | 11% |
| MM12T | ZNF503-AS2 | ZNF503 antisense RNA 2              | ENST00000425916 | chr10_77167197-77167197_A_G  | 94S>G   | Substitution | Nonsynonymous coding | 43% |
| MM12T | ZNF507     | zinc finger protein 507             | CCDS32985.1     | chr19_32844473-32844473_G_A  | 246G>D  | Substitution | Nonsynonymous coding | 11% |
| MM12T | ZNF512B    | zinc finger protein 512B            | CCDS13548.1     | chr20_62595691-62595691_C_A  | 439G>W  | Substitution | Nonsynonymous coding | 30% |
| MM12T | ZNF513     | zinc finger protein 513             | CCDS1751.1      | chr2_27600731-27600731_C_T   | 436R>H  | Substitution | Nonsynonymous coding | 13% |
| MM12T | ZNF516     | zinc finger protein 516             | ENST00000443185 | chr18_74091039-74091039_T_C  | 1011R>G | Substitution | Nonsynonymous coding | 36% |
| MM12T | ZNF518A    | zinc finger protein 518A            | ENST00000371192 | chr10_97919602-97919602_C_T  | 1175P>S | Substitution | Nonsynonymous coding | 15% |
| MM12T | ZNF530     | zinc finger protein 530             | CCDS12955.1     | chr19_58118445-58118445_C_T  | 518P>S  | Substitution | Nonsynonymous coding | 20% |
| MM12T | ZNF541     | zinc finger protein 541             | CCDS46133.1     | chr19_48036208-48036208_C_T  | 1058G>D | Substitution | Nonsynonymous coding | 13% |
| MM12T | ZNF541     | zinc finger protein 541             | CCDS46133.1     | chr19_48059100-48059100_C_T  | 5S>N    | Substitution | Nonsynonymous coding | 39% |
| MM12T | ZNF547     | zinc finger protein 547             | CCDS33131.1     | chr19_57883174-57883174_G_A  | 17A>T   | Substitution | Nonsynonymous coding | 29% |
| MM12T | ZNF550     | zinc finger protein 550             | CCDS35500.1     | chr19_58058566-58058566_C_T  | 308G>E  | Substitution | Nonsynonymous coding | 31% |
| MM12T | ZNF551     | zinc finger protein 551             | CCDS12959.1     | chr19_58199257-58199257_A_C  | 522K>N  | Substitution | Nonsynonymous coding | 24% |
| MM12T | ZNF557     | zinc finger protein 557             | CCDS42485.1     | chr19_7082968-7082968_G_A    | 169R>Q  | Substitution | Nonsynonymous coding | 22% |
| MM12T | ZNF560     | zinc finger protein 560             | CCDS12214.1     | chr19_9577275-9577275_C_T    | 783R>H  | Substitution | Nonsynonymous coding | 17% |
| MM12T | ZNF566     | zinc finger protein 566             | CCDS46061.1     | chr19_36940252-36940252_C_T  | 296G>D  | Substitution | Nonsynonymous coding | 19% |



|       |         |                          |                 |                              |         |              |                      |     |
|-------|---------|--------------------------|-----------------|------------------------------|---------|--------------|----------------------|-----|
| MM12T | ZNF567  | zinc finger protein 567  | CCDS12495.1     | chr19_37203712-37203712_C_A  | 25L>I   | Substitution | Nonsynonymous coding | 28% |
| MM12T | ZNF57   | zinc finger protein 57   | CCDS12098.1     | chr19_2917568-2917568_T_A    | 317F>I  | Substitution | Nonsynonymous coding | 23% |
| MM12T | ZNF571  | zinc finger protein 571  | CCDS12505.1     | chr19_38056003-38056003_C_A  | 443G>C  | Substitution | Nonsynonymous coding | 15% |
| MM12T | ZNF577  | zinc finger protein 577  | CCDS12842.2     | chr19_52375811-52375811_A_G  | 478Y>H  | Substitution | Nonsynonymous coding | 41% |
| MM12T | ZNF587B | zinc finger protein 587B | ENST00000442832 | chr19_58352985-58352985_C_T  | 315R>C  | Substitution | Nonsynonymous coding | 12% |
| MM12T | ZNF592  | zinc finger protein 592  | CCDS32317.1     | chr15_85333980-85333980_C_A  | 755F>L  | Substitution | Nonsynonymous coding | 11% |
| MM12T | ZNF592  | zinc finger protein 592  | CCDS32317.1     | chr15_85341125-85341125_C_A  | 809L>M  | Substitution | Nonsynonymous coding | 34% |
| MM12T | ZNF592  | zinc finger protein 592  | CCDS32317.1     | chr15_85343144-85343144_G_A  | 1070G>D | Substitution | Nonsynonymous coding | 39% |
| MM12T | ZNF596  | zinc finger protein 596  | CCDS5951.2      | chr8_195827-195827_G_A       | 327R>K  | Substitution | Nonsynonymous coding | 26% |
| MM12T | ZNF598  | zinc finger protein 598  | ENST00000431526 | chr16_2052674-2052674_C_A    | 175Q>H  | Substitution | Nonsynonymous coding | 34% |
| MM12T | ZNF609  | zinc finger protein 609  | CCDS32270.1     | chr15_64967247-64967247_A_   | NA      | Deletion     | Frameshift           | 22% |
| MM12T | ZNF609  | zinc finger protein 609  | CCDS32270.1     | chr15_64967551-64967551_C_A  | 833A>D  | Substitution | Nonsynonymous coding | 34% |
| MM12T | ZNF609  | zinc finger protein 609  | CCDS32270.1     | chr15_64970645-64970645_C_T  | 1245R>W | Substitution | Nonsynonymous coding | 37% |
| MM12T | ZNF614  | zinc finger protein 614  | CCDS12847.1     | chr19_52519269-52519269_C_T  | 528V>I  | Substitution | Nonsynonymous coding | 26% |
| MM12T | ZNF615  | zinc finger protein 615  | CCDS12846.1     | chr19_52496498-52496498_G_A  | 611L>F  | Substitution | Nonsynonymous coding | 24% |
| MM12T | ZNF618  | zinc finger protein 618  | CCDS48008.1     | chr9_116750605-116750605_C_T | 28R>C   | Substitution | Nonsynonymous coding | 33% |
| MM12T | ZNF618  | zinc finger protein 618  | CCDS48008.1     | chr9_116811788-116811788_G_A | 643A>T  | Substitution | Nonsynonymous coding | 10% |
| MM12T | ZNF638  | zinc finger protein 638  | CCDS1917.1      | chr2_71645753-71645753_G_A   | 1095E>K | Substitution | Nonsynonymous coding | 18% |
| MM12T | ZNF638  | zinc finger protein 638  | CCDS1917.1      | chr2_71650903-71650903_C_T   | 1420S>F | Substitution | Nonsynonymous coding | 13% |
| MM12T | ZNF641  | zinc finger protein 641  | ENST00000448928 | chr12_48741009-48741009_G_A  | 101S>F  | Substitution | Nonsynonymous coding | 15% |
| MM12T | ZNF645  | zinc finger protein 645  | CCDS14205.1     | chrX_22291269-22291269_T_A   | 54I>N   | Substitution | Nonsynonymous coding | 26% |
| MM12T | ZNF646  | zinc finger protein 646  | CCDS10702.1     | chr16_31089593-31089593_G_A  | 650A>T  | Substitution | Nonsynonymous coding | 18% |
| MM12T | ZNF646  | zinc finger protein 646  | CCDS10702.1     | chr16_31090236-31090236_G_A  | 864R>H  | Substitution | Nonsynonymous coding | 18% |
| MM12T | ZNF648  | zinc finger protein 648  | CCDS30952.1     | chr1_182026427-182026427_C_T | 240R>H  | Substitution | Nonsynonymous coding | 40% |
| MM12T | ZNF668  | zinc finger protein 668  | CCDS10701.1     | chr16_31073434-31073434_C_T  | 272R>H  | Substitution | Nonsynonymous coding | 16% |
| MM12T | ZNF668  | zinc finger protein 668  | CCDS10701.1     | chr16_31075395-31075395_A_G  | 129V>A  | Substitution | Nonsynonymous coding | 14% |
| MM12T | ZNF674  | zinc finger protein 674  | CCDS48099.1     | chrX_46360669-46360669_T_G   | 119S>R  | Substitution | Nonsynonymous coding | 33% |
| MM12T | ZNF680  | zinc finger protein 680  | CCDS34644.1     | chr7_63981547-63981547_T_A   | 529N>Y  | Substitution | Nonsynonymous coding | 25% |
| MM12T | ZNF689  | zinc finger protein 689  | CCDS10686.1     | chr16_30616060-30616060_C_T  | 343R>H  | Substitution | Nonsynonymous coding | 13% |
| MM12T | ZNF711  | zinc finger protein 711  | CCDS35344.1     | chrX_84510624-84510624_G_T   | 147D>Y  | Substitution | Nonsynonymous coding | 27% |
| MM12T | ZNF74   | zinc finger protein 74   | CCDS42982.1     | chr22_20759760-20759760_C_T  | 146A>V  | Substitution | Nonsynonymous coding | 18% |
| MM12T | ZNF74   | zinc finger protein 74   | CCDS42982.1     | chr22_20759925-20759925_G_T  | 201R>L  | Substitution | Nonsynonymous coding | 13% |

|       |         |                                           |                 |                               |         |              |                      |     |
|-------|---------|-------------------------------------------|-----------------|-------------------------------|---------|--------------|----------------------|-----|
| MM12T | ZNF749  | zinc finger protein 749                   | CCDS33132.2     | chr19_57955378-57955378_C_T   | 288H>Y  | Substitution | Nonsynonymous coding | 35% |
| MM12T | ZNF764  | zinc finger protein 764                   | CCDS10683.1     | chr16_30566909-30566909_C_T   | 278R>Q  | Substitution | Nonsynonymous coding | 48% |
| MM12T | ZNF770  | zinc finger protein 770                   | CCDS10042.1     | chr15_35273765-35273765_A_G   | 624L>P  | Substitution | Nonsynonymous coding | 26% |
| MM12T | ZNF770  | zinc finger protein 770                   | CCDS10042.1     | chr15_35273843-35273843_G_A   | 598P>L  | Substitution | Nonsynonymous coding | 32% |
| MM12T | ZNF770  | zinc finger protein 770                   | CCDS10042.1     | chr15_35274733-35274733_C_A   | 301K>N  | Substitution | Nonsynonymous coding | 24% |
| MM12T | ZNF771  | zinc finger protein 771                   | CCDS45460.1     | chr16_30419515-30419515_G_T   | 47E>D   | Substitution | Nonsynonymous coding | 23% |
| MM12T | ZNF772  | zinc finger protein 772                   | CCDS33133.1     | chr19_57985738-57985738_G_T   | 125S>Y  | Substitution | Nonsynonymous coding | 27% |
| MM12T | ZNF777  | zinc finger protein 777                   | CCDS43675.1     | chr7_149152453-149152453_C_T  | 221A>T  | Substitution | Nonsynonymous coding | 27% |
| MM12T | ZNF778  | zinc finger protein 778                   | CCDS45550.1     | chr16_89293954-89293954_C_T   | 392P>S  | Substitution | Nonsynonymous coding | 30% |
| MM12T | ZNF778  | zinc finger protein 778                   | CCDS45550.1     | chr16_89294281-89294281_G_A   | 501G>R  | Substitution | Nonsynonymous coding | 29% |
| MM12T | ZNF782  | zinc finger protein 782                   | NM_001001662    | chr9_99580954-99580954_C_T    | 451E>K  | Substitution | Nonsynonymous coding | 28% |
| MM12T | ZNF784  | zinc finger protein 784                   | CCDS12930.1     | chr19_56133152-56133152_C_    | NA      | Deletion     | Frameshift           | 31% |
| MM12T | ZNF784  | zinc finger protein 784                   | CCDS12930.1     | chr19_56133973-56133973_G_A   | 39P>L   | Substitution | Nonsynonymous coding | 32% |
| MM12T | ZNF805  | zinc finger protein 805                   | CCDS46207.1     | chr19_57765391-57765391_C_A   | 402L>I  | Substitution | Nonsynonymous coding | 27% |
| MM12T | ZNF814  | zinc finger protein 814                   | CCDS46212.1     | chr19_58385188-58385188_C_A   | 524E>X  | Substitution | Nonsense             | 25% |
| MM12T | ZNF829  | zinc finger protein 829                   | NM_001037232    | chr19_37383070-37383070_C_T   | 208G>D  | Substitution | Nonsynonymous coding | 14% |
| MM12T | ZNF835  | zinc finger protein 835                   | ENST00000342088 | chr19_57175489-57175489_G_A   | 382R>W  | Substitution | Nonsynonymous coding | 38% |
| MM12T | ZNF837  | zinc finger protein 837                   | CCDS46216.1     | chr19_58879928-58879928_G_A   | 258P>S  | Substitution | Nonsynonymous coding | 27% |
| MM12T | ZNF837  | zinc finger protein 837                   | CCDS46216.1     | chr19_58880336-58880336_C_T   | 122G>R  | Substitution | Nonsynonymous coding | 16% |
| MM12T | ZNF839  | zinc finger protein 839                   | CCDS45164.1     | chr14_102807753-102807753_C_T | 674A>V  | Substitution | Nonsynonymous coding | 11% |
| MM12T | ZNF860  | zinc finger protein 860                   | CCDS46784.1     | chr3_32030787-32030787_G_T    | 72K>N   | Substitution | Nonsynonymous coding | 10% |
| MM12T | ZNF862  | zinc finger protein 862                   | CCDS47741.1     | chr7_149556556-149556556_G_T  | 388R>M  | Substitution | Nonsynonymous coding | 30% |
| MM12T | ZNFX1   | zinc finger, NFX1-type containing 1       | ENST00000371754 | chr20_47855693-47855693_C_T   | 1191A>T | Substitution | Nonsynonymous coding | 38% |
| MM12T | ZNRF3   | zinc and ring finger 3                    | CCDS42999.1     | chr22_29445509-29445509_G_A   | 347R>H  | Substitution | Nonsynonymous coding | 25% |
| MM12T | ZNRF4   | zinc and ring finger 4                    | CCDS42475.1     | chr19_5455987-5455987_G_A     | 162R>H  | Substitution | Nonsynonymous coding | 40% |
| MM12T | ZNRF4   | zinc and ring finger 4                    | CCDS42475.1     | chr19_5456047-5456047_C_T     | 182A>V  | Substitution | Nonsynonymous coding | 37% |
| MM12T | ZP4     | zona pellucida glycoprotein 4             | CCDS1615.1      | chr1_238048809-238048809_C_T  | 348V>M  | Substitution | Nonsynonymous coding | 34% |
| MM12T | ZP4     | zona pellucida glycoprotein 4             | CCDS1615.1      | chr1_238050080-238050080_C_T  | 277S>N  | Substitution | Nonsynonymous coding | 14% |
| MM12T | ZPBP2   | zona pellucida binding protein 2          | CCDS11352.1     | chr17_38031658-38031661_GTCT_ | NA      | Deletion     | Frameshift           | 14% |
| MM12T | ZPLD1   | zona pellucida-like domain containing 1   | CCDS2947.1      | chr3_102176660-102176660_G_A  | 198G>D  | Substitution | Nonsynonymous coding | 28% |
| MM12T | ZSCAN22 | zinc finger and SCAN domain containing 22 | CCDS12975.1     | chr19_58849890-58849890_C_A   | 225A>D  | Substitution | Nonsynonymous coding | 12% |
| MM12T | ZSCAN25 | zinc finger and SCAN domain containing 25 | CCDS5671.2      | chr7_99217330-99217330_A_G    | 34E>G   | Substitution | Nonsynonymous coding | 31% |

|       |          |                                                                           |                 |                               |         |              |                      |     |
|-------|----------|---------------------------------------------------------------------------|-----------------|-------------------------------|---------|--------------|----------------------|-----|
| MM12T | ZSCAN32  | zinc finger and SCAN domain containing 32                                 | CCDS10503.1     | chr16_3434723-3434723_G_A     | 112R>C  | Substitution | Nonsynonymous coding | 27% |
| MM12T | ZSWIM2   | zinc finger, SWIM-type containing 2                                       | CCDS33348.1     | chr2_187693018-187693018_C_T  | 532C>Y  | Substitution | Nonsynonymous coding | 12% |
| MM12T | ZSWIM4   | zinc finger, SWIM-type containing 4                                       | CCDS32924.1     | chr19_13930227-13930227_A_G   | 544T>A  | Substitution | Nonsynonymous coding | 11% |
| MM12T | ZSWIM5   | zinc finger, SWIM-type containing 5                                       | CCDS41319.1     | chr1_45525828-45525828__A     | NA      | Insertion    | Frameshift           | 27% |
| MM12T | ZSWIM6   | zinc finger, SWIM-type containing 6                                       | CCDS47215.1     | chr5_60827525-60827525_C_T    | 740R>C  | Substitution | Nonsynonymous coding | 39% |
| MM12T | ZSWIM8   | zinc finger, SWIM-type containing 8                                       | CCDS44440.1     | chr10_75551790-75551790_G_A   | 498S>N  | Substitution | Nonsynonymous coding | 32% |
| MM12T | ZW10     | zw10 kinetochore protein                                                  | CCDS8363.1      | chr11_113614602-113614602_C_T | 478R>H  | Substitution | Nonsynonymous coding | 14% |
| MM12T | ZXDA     | zinc finger, X-linked, duplicated A                                       | CCDS14376.1     | chrX_57934750-57934750_A_G    | 702L>S  | Substitution | Nonsynonymous coding | 57% |
| MM12T | ZXDA     | zinc finger, X-linked, duplicated A                                       | CCDS14376.1     | chrX_57935816-57935816_G_T    | 347L>I  | Substitution | Nonsynonymous coding | 13% |
| MM12T | ZYG11A   | zyg-11 family member A, cell cycle regulator                              | CCDS44148.1     | chr1_53329665-53329665_G_A    | 388G>R  | Substitution | Nonsynonymous coding | 27% |
| MM12T | ZZEF1    | zinc finger, ZZ-type with EF-hand domain 1                                | CCDS11043.1     | chr17_3912990-3912990_C_T     | 2881G>S | Substitution | Nonsynonymous coding | 26% |
| MM13T | ABCD1    | ATP-binding cassette, sub-family D (ALD), member 1                        | ENST00000370129 | chrX_152995000-152995000_C_A  | 220A>D  | Substitution | Nonsynonymous coding | 36% |
| MM13T | AIFM1    | apoptosis-inducing factor, mitochondrion-associated, 1                    | CCDS14618.1     | chrX_129270133-129270133_C_T  | 398V>M  | Substitution | Nonsynonymous coding | 30% |
| MM13T | ALDH3B2  | aldehyde dehydrogenase 3 family, member B2                                | CCDS31622.1     | chr11_67434396-67434396_T_G   | 4E>A    | Substitution | Nonsynonymous coding | 29% |
| MM13T | ALX4     | ALX homeobox 4                                                            | CCDS31468.1     | chr11_44286451-44286451_G_A   | 397R>C  | Substitution | Nonsynonymous coding | 20% |
| MM13T | ANK3     | ankyrin 3, node of Ranvier (ankyrin G)                                    | CCDS7258.1      | chr10_61833119-61833119_G_C   | 2507A>G | Substitution | Nonsynonymous coding | 23% |
| MM13T | APLP2    | amyloid beta (A4) precursor-like protein 2                                | CCDS8486.1      | chr11_129999959-129999959_GC  | NA      | Insertion    | Frameshift           | 10% |
| MM13T | ARC      | activity-regulated cytoskeleton-associated protein                        | CCDS34950.1     | chr8_143694459-143694459_G_A  | 392R>W  | Substitution | Nonsynonymous coding | 68% |
| MM13T | ARHGAP35 | Rho GTPase activating protein 35                                          | CCDS46127.1     | chr19_47422518-47422519_GT_   | NA      | Deletion     | Frameshift           | 33% |
| MM13T | ARHGEF16 | Rho guanine nucleotide exchange factor (GEF) 16                           | CCDS46.2        | chr1_3390015-3390015_G_A      | 412G>R  | Substitution | Nonsynonymous coding | 33% |
| MM13T | ATP1A1   | ATPase, Na <sup>+</sup> /K <sup>+</sup> transporting, alpha 1 polypeptide | CCDS887.1       | chr1_116933411-116933411_T_   | NA      | Deletion     | Frameshift           | 23% |
| MM13T | AUTS2    | autism susceptibility candidate 2                                         | CCDS5539.1      | chr7_69599558-69599558_G_C    | NA      | Substitution | Splice site donor    | 12% |
| MM13T | BACH2    | BTB and CNC homology 1, basic leucine zipper transcription factor 2       | CCDS5026.1      | chr6_90642510-90642510_G_A    | 715R>X  | Substitution | Nonsense             | 35% |
| MM13T | BAZ1A    | bromodomain adjacent to zinc finger domain, 1A                            | CCDS9651.1      | chr14_35295298-35295298_C_A   | 153V>F  | Substitution | Nonsynonymous coding | 15% |
| MM13T | BEND3    | BEN domain containing 3                                                   | CCDS34507.1     | chr6_107390525-107390525_G_A  | 624R>C  | Substitution | Nonsynonymous coding | 36% |
| MM13T | C3orf79  | chromosome 3 open reading frame 79                                        | CCDS46937.1     | chr3_153202386-153202386_T_A  | 14L>H   | Substitution | Nonsynonymous coding | 21% |
| MM13T | CHMP5    | charged multivesicular body protein 5                                     | CCDS6537.1      | chr9_33265101-33265101__A     | NA      | Insertion    | Frameshift           | 36% |
| MM13T | CLTB     | clathrin, light chain B                                                   | NM_007097       | chr5_175824647-175824647_C_T  | 142R>H  | Substitution | Nonsynonymous coding | 14% |
| MM13T | CNTNAP2  | contactin associated protein-like 2                                       | CCDS5889.1      | chr7_146536893-146536893_C_A  | 100T>N  | Substitution | Nonsynonymous coding | 20% |
| MM13T | CNTNAP4  | contactin associated protein-like 4                                       | NM_138994       | chr16_76555193-76555193_G_A   | 768R>Q  | Substitution | Nonsynonymous coding | 24% |
| MM13T | CRMP1    | collapsin response mediator protein 1                                     | CCDS33950.1     | chr4_5857939-5857939_G_T      | 251L>I  | Substitution | Nonsynonymous coding | 16% |
| MM13T | CTCF     | CCCTC-binding factor (zinc finger protein)                                | CCDS10841.1     | chr16_67645363-67645366_AGCA_ | NA      | Deletion     | Frameshift           | 24% |

|       |          |                                                                                |                 |                               |         |              |                      |     |
|-------|----------|--------------------------------------------------------------------------------|-----------------|-------------------------------|---------|--------------|----------------------|-----|
| MM13T | DACH1    | dachshund homolog 1 (Drosophila)                                               | ENST00000359684 | chr13_72147624-72147624_C_T   | 405R>H  | Substitution | Nonsynonymous coding | 21% |
| MM13T | DHX38    | DEAH (Asp-Glu-Ala-His) box polypeptide 38                                      | CCDS10907.1     | chr16_72134988-72134988_G_C   | 428E>Q  | Substitution | Nonsynonymous coding | 42% |
| MM13T | DLL1     | delta-like 1 (Drosophila)                                                      | CCDS5313.1      | chr6_170592410-170592410_C_T  | 653A>T  | Substitution | Nonsynonymous coding | 39% |
| MM13T | DOCK2    | dedicator of cytokinesis 2                                                     | CCDS4371.1      | chr5_169230068-169230068_G_A  | 854R>Q  | Substitution | Nonsynonymous coding | 51% |
| MM13T | ELFN1    | extracellular leucine-rich repeat and fibronectin type III domain containing 1 | NM_001128636    | chr7_1784787-1784787_C_A      | 185C>X  | Substitution | Nonsense             | 24% |
| MM13T | ERAP1    | endoplasmic reticulum aminopeptidase 1                                         | CCDS4085.1      | chr5_96139199-96139199_G_A    | 144P>L  | Substitution | Nonsynonymous coding | 25% |
| MM13T | FAM135B  | family with sequence similarity 135, member B                                  | CCDS6375.2      | chr8_139209874-139209874_G_C  | 236H>Q  | Substitution | Nonsynonymous coding | 63% |
| MM13T | FANCM    | Fanconi anemia, complementation group M                                        | CCDS32070.1     | chr14_45650909-45650909_G_A   | NA      | Substitution | Splice site donor    | 33% |
| MM13T | FGD1     | FYVE, RhoGEF and PH domain containing 1                                        | CCDS14359.1     | chrX_54497764-54497764_G_A    | 155P>L  | Substitution | Nonsynonymous coding | 44% |
| MM13T | FICD     | FIC domain containing                                                          | CCDS9116.1      | chr12_108913130-108913130_G_A | 419A>T  | Substitution | Nonsynonymous coding | 45% |
| MM13T | FOXA1    | forkhead box A1                                                                | CCDS9665.1      | chr14_38061844-38061845_TC_   | NA      | Deletion     | Frameshift           | 19% |
| MM13T | FOXA2    | forkhead box A2                                                                | CCDS46585.1     | chr20_22563567-22563567_C     | NA      | Insertion    | Frameshift           | 31% |
| MM13T | GAB3     | GRB2-associated binding protein 3                                              | CCDS48198.1     | chrX_153906480-153906480_G_A  | 580T>M  | Substitution | Nonsynonymous coding | 22% |
| MM13T | GABRE    | gamma-aminobutyric acid (GABA) A receptor, epsilon                             | CCDS14703.1     | chrX_151138176-151138176_C_T  | 103V>I  | Substitution | Nonsynonymous coding | 34% |
| MM13T | GALNT18  | UDP-N-acetyl-alpha-D-galactosamine:polypeptide N-glycan transferase 18         | CCDS7807.1      | chr11_11394141-11394141_C_T   | 338R>Q  | Substitution | Nonsynonymous coding | 43% |
| MM13T | GREB1    | growth regulation by estrogen in breast cancer 1                               | CCDS42655.1     | chr2_11716524-11716524_A      | NA      | Insertion    | Frameshift           | 36% |
| MM13T | HCRTR2   | hypocretin (orexin) receptor 2                                                 | CCDS4956.1      | chr6_55142277-55142277_G_A    | 288A>T  | Substitution | Nonsynonymous coding | 38% |
| MM13T | HVCN1    | hydrogen voltage-gated channel 1                                               | CCDS31900.1     | chr12_111089018-111089018_G_A | NA      | Substitution | Splice site donor    | 65% |
| MM13T | IL13RA2  | interleukin 13 receptor, alpha 2                                               | CCDS14565.1     | chrX_114249124-114249124_T_C  | 87K>R   | Substitution | Nonsynonymous coding | 24% |
| MM13T | IRS4     | insulin receptor substrate 4                                                   | CCDS14544.1     | chrX_107978999-107978999_C_A  | 192L>F  | Substitution | Nonsynonymous coding | 37% |
| MM13T | KCNG4    | potassium voltage-gated channel, subfamily G, member 4                         | CCDS10945.1     | chr16_84270841-84270841_C_T   | 84R>H   | Substitution | Nonsynonymous coding | 32% |
| MM13T | KCNK5    | potassium channel, subfamily K, member 5                                       | CCDS4841.1      | chr6_39159259-39159259_C_T    | 303D>N  | Substitution | Nonsynonymous coding | 37% |
| MM13T | KCTD19   | potassium channel tetramerisation domain containing 19                         | CCDS42179.1     | chr16_67327811-67327812_GA_   | NA      | Deletion     | Frameshift           | 30% |
| MM13T | KCTD8    | potassium channel tetramerisation domain containing 8                          | CCDS3467.1      | chr4_44450429-44450429_C_T    | 38A>T   | Substitution | Nonsynonymous coding | 27% |
| MM13T | KIAA1109 | Uncharacterized protein                                                        | CCDS43267.1     | chr4_123141510-123141510_A_G  | 833E>G  | Substitution | Nonsynonymous coding | 13% |
| MM13T | LEPRE1   | leucine proline-enriched proteoglycan (leprecan) 1                             | ENST00000236040 | chr1_43212896-43212896_G_A    | 701P>L  | Substitution | Nonsynonymous coding | 33% |
| MM13T | LIT1     | leucine-rich repeat, immunoglobulin-like and transmembrane domains 1           | CCDS7373.1      | chr10_85992410-85992410_T_C   | 382H>R  | Substitution | Nonsynonymous coding | 75% |
| MM13T | LRP1B    | low density lipoprotein receptor-related protein 1B                            | CCDS2182.1      | chr2_141812742-141812742_G_A  | 499R>W  | Substitution | Nonsynonymous coding | 26% |
| MM13T | MAST3    | microtubule associated serine/threonine kinase 3                               | CCDS46014.1     | chr19_18245498-18245498_G_T   | 532A>S  | Substitution | Nonsynonymous coding | 47% |
| MM13T | ME2      | malic enzyme 2, NAD(+)-dependent, mitochondrial                                | CCDS11948.1     | chr18_48473489-48473489_T_A   | 564S>T  | Substitution | Nonsynonymous coding | 17% |
| MM13T | MED12L   | mediator complex subunit 12-like                                               | CCDS33876.1     | chr3_150877641-150877641_C_T  | 287S>L  | Substitution | Nonsynonymous coding | 37% |
| MM13T | MLL3     | myeloid/lymphoid or mixed-lineage leukemia 3                                   | CCDS5931.1      | chr7_151845228-151845228_C_T  | 4595R>H | Substitution | Nonsynonymous coding | 22% |

|       |             |                                                                |                 |                                |         |              |                      |     |
|-------|-------------|----------------------------------------------------------------|-----------------|--------------------------------|---------|--------------|----------------------|-----|
| MM13T | MRPL28      | mitochondrial ribosomal protein L28                            | CCDS32349.1     | chr16_420119-420119_C_A        | 34E>X   | Substitution | Nonsense             | 35% |
| MM13T | MTA2        | metastasis associated 1 family, member 2                       | CCDS8022.1      | chr11_62367678-62367678_G_T    | 50D>E   | Substitution | Nonsynonymous coding | 10% |
| MM13T | MTSSL1      | metastasis suppressor 1-like                                   | CCDS32476.1     | chr16_70699395-70699395_C_T    | 368V>I  | Substitution | Nonsynonymous coding | 27% |
| MM13T | MYH6        | myosin, heavy chain 6, cardiac muscle, alpha                   | CCDS9600.1      | chr14_23866412-23866412_G_A    | 673R>C  | Substitution | Nonsynonymous coding | 40% |
| MM13T | MYOF        | myoferlin                                                      | CCDS41551.1     | chr10_95111278-95111279_CA_    | NA      | Deletion     | Frameshift           | 20% |
| MM13T | NFIC        | nuclear factor I/C (CCAAT-binding transcription factor)        | CCDS45914.1     | chr19_3452578-3452578_C_T      | 386R>C  | Substitution | Nonsynonymous coding | 22% |
| MM13T | NPY1R       | neuropeptide Y receptor Y1                                     | CCDS34089.1     | chr4_164247631-164247631_G_T   | 26L>M   | Substitution | Nonsynonymous coding | 35% |
| MM13T | NT5DC4      | 5'-nucleotidase domain containing 4                            | ENST00000327581 | chr2_113479589-113479589_C_G   | 38L>V   | Substitution | Nonsynonymous coding | 30% |
| MM13T | NUP160      | nucleoporin 160kDa                                             | CCDS31484.1     | chr11_47814444-47814448_AGAGT_ | NA      | Deletion     | Frameshift           | 26% |
| MM13T | OR11L1      | olfactory receptor, family 11, subfamily L, member 1           | CCDS31098.1     | chr1_248004543-248004543_A_T   | 219V>D  | Substitution | Nonsynonymous coding | 20% |
| MM13T | OR8G1       | olfactory receptor, family 8, subfamily G, member 1            | NM_001002905    | chr11_124121273-124121273_T_G  | 284M>R  | Substitution | Nonsynonymous coding | 11% |
| MM13T | PAFAH2      | platelet-activating factor acetylhydrolase 2, 40kDa            | CCDS270.1       | chr1_26288563-26288563_C_G     | 366D>H  | Substitution | Nonsynonymous coding | 33% |
| MM13T | PDLIM5      | PDZ and LIM domain 5                                           | CCDS3641.1      | chr4_95376489-95376489_G_A     | 17R>Q   | Substitution | Nonsynonymous coding | 42% |
| MM13T | PDZRN4      | PDZ domain containing ring finger 4                            | CCDS8739.1      | chr12_41967456-41967456_C_T    | 701R>C  | Substitution | Nonsynonymous coding | 23% |
| MM13T | PIK3R1      | phosphoinositide-3-kinase, regulatory subunit 1 (alpha)        | CCDS3993.1      | chr5_67591132-67591134_GAC_    | 575KT>K | Deletion     | In-frame deletion    | 45% |
| MM13T | PIK3R1      | phosphoinositide-3-kinase, regulatory subunit 1 (alpha)        | CCDS3993.1      | chr5_67588168-67588168_G_      | NA      | Deletion     | Frameshift           | 30% |
| MM13T | PPP1R18     | protein phosphatase 1, regulatory subunit 18                   | CCDS43444.1     | chr6_30652397-30652397_G_A     | 467R>C  | Substitution | Nonsynonymous coding | 35% |
| MM13T | PRKDC       | protein kinase, DNA-activated, catalytic polypeptide           | ENST00000314191 | chr8_48743181-48743181_T       | NA      | Insertion    | Frameshift           | 69% |
| MM13T | PTEN        | phosphatase and tensin homolog                                 | NM_000314       | chr10_89692904-89692904_C_G    | 130R>G  | Substitution | Nonsynonymous coding | 75% |
| MM13T | PTGDR       | prostaglandin D2 receptor (DP)                                 | CCDS9707.1      | chr14_52735046-52735046_G_A    | 172G>R  | Substitution | Nonsynonymous coding | 43% |
| MM13T | QRFPR       | pyroglutamylated RFamide peptide receptor                      | CCDS3719.1      | chr4_122258006-122258006_C_T   | 173A>T  | Substitution | Nonsynonymous coding | 16% |
| MM13T | RAPGEF6     | Rap guanine nucleotide exchange factor (GEF) 6                 | NM_001164389    | chr5_130771876-130771876_G_C   | 1315P>R | Substitution | Nonsynonymous coding | 56% |
| MM13T | RBBP7       | retinoblastoma binding protein 7                               | CCDS14179.1     | chrX_16870879-16870879_G_A     | 293A>V  | Substitution | Nonsynonymous coding | 38% |
| MM13T | RP5-944M2.3 | Known lincRNA                                                  | ENST00000397346 | chr12_126942660-126942660_C_A  | 118A>D  | Substitution | Nonsynonymous coding | 22% |
| MM13T | SALL1       | sal-like 1 (Drosophila)                                        | CCDS10747.1     | chr16_51173432-51173432_C      | NA      | Insertion    | Frameshift           | 29% |
| MM13T | SPEG        | SPEG complex locus                                             | CCDS42824.1     | chr2_220312959-220312959_C_T   | 360S>L  | Substitution | Nonsynonymous coding | 35% |
| MM13T | SUN1        | Sad1 and UNC84 domain containing 1                             | CCDS47525.1     | chr7_912960-912960_G_A         | 784V>I  | Substitution | Nonsynonymous coding | 29% |
| MM13T | TELO2       | TEL2, telomere maintenance 2, homolog (S. cerevisiae)          | CCDS32363.1     | chr16_1544365-1544365_T_G      | 28I>S   | Substitution | Nonsynonymous coding | 38% |
| MM13T | TGFBRAP1    | transforming growth factor, beta receptor associated protein 1 | CCDS2067.1      | chr2_105897062-105897062_T_A   | 414T>S  | Substitution | Nonsynonymous coding | 31% |
| MM13T | TM4SF18     | transmembrane 4 L six family member 18                         | CCDS3142.1      | chr3_149042713-149042713_G_A   | 122R>C  | Substitution | Nonsynonymous coding | 26% |
| MM13T | TMEM174     | transmembrane protein 174                                      | CCDS4018.1      | chr5_72469593-72469593_G_A     | 175A>T  | Substitution | Nonsynonymous coding | 26% |
| MM13T | TP53        | tumor protein p53                                              | CCDS11118.1     | chr17_7577539-7577539_G_A      | 248R>W  | Substitution | Nonsynonymous coding | 72% |

|       |          |                                                                             |                 |                                 |         |              |                      |     |
|-------|----------|-----------------------------------------------------------------------------|-----------------|---------------------------------|---------|--------------|----------------------|-----|
| MM13T | TXNIP    | thioredoxin interacting protein                                             | CCDS913.1       | chr1_145440910-145440910_T      | NA      | Insertion    | Frameshift           | 29% |
| MM13T | UBE2J2   | ubiquitin-conjugating enzyme E2, J2                                         | ENST00000450390 | chr1_1201553-1201553_C_T        | 52R>Q   | Substitution | Nonsynonymous coding | 34% |
| MM13T | URB1     | URB1 ribosome biogenesis 1 homolog (S. cerevisiae)                          | CCDS46645.1     | chr21_33709719-33709719_C_T     | 1539V>I | Substitution | Nonsynonymous coding | 31% |
| MM14T | ARHGEF4  | Rho guanine nucleotide exchange factor (GEF) 4                              | ENST00000409359 | chr2_131674634-131674634_G_C    | 709G>R  | Substitution | Nonsynonymous coding | 61% |
| MM14T | ASH1L    | ash1 (absent, small, or homeotic)-like (Drosophila)                         | CCDS1113.2      | chr1_155451916-155451920_CCAAT_ | NA      | Deletion     | Frameshift           | 41% |
| MM14T | ATOH8    | atonal homolog 8 (Drosophila)                                               | CCDS1985.1      | chr2_85991262-85991262_G_A      | 306C>Y  | Substitution | Nonsynonymous coding | 61% |
| MM14T | BAHCC1   | BAH domain and coiled-coil containing 1 [Source:HGNC Symbol;Acc:29279]      | ENST00000436173 | chr17_79409975-79409975_G_A     | 534G>S  | Substitution | Nonsynonymous coding | 13% |
| MM14T | BIRC6    | baculoviral IAP repeat containing 6                                         | CCDS33175.2     | chr2_32667409-32667409_A_T      | 1375E>V | Substitution | Nonsynonymous coding | 26% |
| MM14T | C12orf40 | chromosome 12 open reading frame 40                                         | CCDS41770.1     | chr12_40040191-40040191_A_T     | 88K>M   | Substitution | Nonsynonymous coding | 41% |
| MM14T | CCDC42B  | coiled-coil domain containing 42B                                           | CCDS44983.1     | chr12_113591080-113591080_G_A   | 112R>Q  | Substitution | Nonsynonymous coding | 31% |
| MM14T | CD40     | CD40 molecule, TNF receptor superfamily member 5                            | CCDS13393.1     | chr20_44756835-44756835_T_G     | 206F>L  | Substitution | Nonsynonymous coding | 25% |
| MM14T | CHDH     | choline dehydrogenase                                                       | CCDS2873.1      | chr3_53857533-53857533_C_T      | 168R>H  | Substitution | Nonsynonymous coding | 58% |
| MM14T | CNKS2    | connector enhancer of kinase suppressor of Ras 2                            | CCDS14198.1     | chrX_21545105-21545105_C_A      | 360P>T  | Substitution | Nonsynonymous coding | 36% |
| MM14T | COL7A1   | collagen, type VII, alpha 1                                                 | CCDS2773.1      | chr3_48627937-48627937_C_T      | 621V>I  | Substitution | Nonsynonymous coding | 58% |
| MM14T | CUX1     | cut-like homeobox 1                                                         | CCDS5721.1      | chr7_101838860-101838860_G_A    | 400R>H  | Substitution | Nonsynonymous coding | 35% |
| MM14T | CYLC1    | cylicin, basic protein of sperm head cytoskeleton 1                         | CCDS35341.1     | chrX_83129621-83129621_A_T      | 635K>N  | Substitution | Nonsynonymous coding | 33% |
| MM14T | DFFB     | DNA fragmentation factor, 40kDa, beta polypeptide (caspase-activated DNase) | CCDS52.1        | chr1_3800067-3800067_G_A        | NA      | Substitution | Splice site acceptor | 37% |
| MM14T | FAM32A   | family with sequence similarity 32, member A                                | CCDS12341.1     | chr19_16296505-16296505_G_A     | 49E>K   | Substitution | Nonsynonymous coding | 72% |
| MM14T | FUOM     | fucose mutarotase                                                           | CCDS44499.1     | chr10_135170181-135170181_G_A   | 96T>M   | Substitution | Nonsynonymous coding | 47% |
| MM14T | IGBP1    | immunoglobulin (CD79A) binding protein 1                                    | CCDS14396.1     | chrX_69354579-69354579_A_T      | 132N>I  | Substitution | Nonsynonymous coding | 32% |
| MM14T | LEMD1    | LEM domain containing 1                                                     | CCDS30986.1     | chr1_205388376-205388376_C_T    | 63D>N   | Substitution | Nonsynonymous coding | 42% |
| MM14T | MDM1     | Mdm1 nuclear protein homolog (mouse)                                        | CCDS8983.1      | chr12_68690766-68690766_A_      | NA      | Deletion     | Splice site acceptor | 14% |
| MM14T | NES      | nestin                                                                      | CCDS1151.1      | chr1_156640613-156640613_G_A    | 1123P>S | Substitution | Nonsynonymous coding | 25% |
| MM14T | OR6C68   | olfactory receptor, family 6, subfamily C, member 68                        | CCDS31826.1     | chr12_55886545-55886545_G_T     | 133L>F  | Substitution | Nonsynonymous coding | 49% |
| MM14T | OR8H2    | olfactory receptor, family 8, subfamily H, member 2                         | CCDS31518.1     | chr11_55872883-55872883_G_A     | 122R>H  | Substitution | Nonsynonymous coding | 91% |
| MM14T | OXT      | oxytocin/neurophysin I prepropeptide                                        | CCDS13044.1     | chr20_3052335-3052335_G_A       | 12G>S   | Substitution | Nonsynonymous coding | 54% |
| MM14T | RANBP2   | RAN binding protein 2                                                       | CCDS2079.1      | chr2_109392300-109392300_C_T    | 2802S>F | Substitution | Nonsynonymous coding | 35% |
| MM14T | RPS6KA2  | ribosomal protein S6 kinase, 90kDa, polypeptide 2                           | CCDS34570.1     | chr6_166952172-166952172_T_A    | 75Q>L   | Substitution | Nonsynonymous coding | 29% |
| MM14T | SBK2     | SH3-binding domain kinase family, member 2                                  | CCDS42631.1     | chr19_56041641-56041641_G_T     | 169S>Y  | Substitution | Nonsynonymous coding | 82% |
| MM14T | SMG7     | smg-7 homolog, nonsense mediated mRNA decay factor (C. elegans)             | CCDS1355.1      | chr1_183518896-183518896_C_A    | NA      | Substitution | Splice site acceptor | 13% |
| MM14T | SMG7     | smg-7 homolog, nonsense mediated mRNA decay factor (C. elegans)             | CCDS1355.1      | chr1_183519915-183519915_C_T    | 1005H>Y | Substitution | Nonsynonymous coding | 12% |
| MM14T | SMG7     | smg-7 homolog, nonsense mediated mRNA decay factor (C. elegans)             | CCDS1355.1      | chr1_183520950-183520950_C_T    | NA      | Substitution | Splice site acceptor | 15% |

|       |         |                                                                      |                 |                                     |          |              |                      |     |
|-------|---------|----------------------------------------------------------------------|-----------------|-------------------------------------|----------|--------------|----------------------|-----|
| MM14T | SYNGAP1 | synaptic Ras GTPase activating protein 1                             | CCDS34434.2     | chr6_33405458-33405458_G_           | NA       | Deletion     | Frameshift           | 29% |
| MM14T | TAB1    | TGF-beta activated kinase 1/MAP3K7 binding protein 1                 | CCDS13993.1     | chr22_39815617-39815617_C_T         | 253T>M   | Substitution | Nonsynonymous coding | 91% |
| MM14T | TMC2    | transmembrane channel-like 2                                         | CCDS13029.2     | chr20_2593864-2593864_G_A           | 590D>N   | Substitution | Nonsynonymous coding | 42% |
| MM14T | TP53    | tumor protein p53                                                    | CCDS11118.1     | chr17_7577556-7577556_C_A           | 242C>F   | Substitution | Nonsynonymous coding | 90% |
| MM14T | TPSG1   | trypsin gamma 1                                                      | CCDS10430.1     | chr16_1272663-1272663_G_A           | 167T>M   | Substitution | Nonsynonymous coding | 38% |
| MM14T | TPX2    | TPX2, microtubule-associated, homolog (Xenopus laevis)               | CCDS13190.1     | chr20_30359385-30359385_G_A         | 170E>K   | Substitution | Nonsynonymous coding | 19% |
| MM14T | TRBV5-1 | T cell receptor beta variable 5-1                                    | ENST00000390381 | chr7_142021217-142021217_T_C        | 66F>S    | Substitution | Nonsynonymous coding | 33% |
| MM14T | TROVE2  | TROVE domain family, member 2                                        | CCDS1379.1      | chr1_193038621-193038621_G_A        | 146R>H   | Substitution | Nonsynonymous coding | 31% |
| MM14T | TRRAP   | transformation/transcription domain-associated protein               | CCDS5659.1      | chr7_98579562-98579562_C_G          | 2910H>Q  | Substitution | Nonsynonymous coding | 36% |
| MM14T | TTN     | titin                                                                | ENST00000356127 | chr2_179440435-179440435_C_T        | 20905R>H | Substitution | Nonsynonymous coding | 65% |
| MM14T | TTN     | titin                                                                | ENST00000356127 | chr2_179498311-179498311_G_C        | 11691P>A | Substitution | Nonsynonymous coding | 37% |
| MM14T | UBR5    | ubiquitin protein ligase E3 component n-recognin 5                   | CCDS34933.1     | chr8_103289345-103289345_C_G        | 2122G>R  | Substitution | Nonsynonymous coding | 41% |
| MM14T | UFL1    | UFM1-specific ligase 1                                               | CCDS5034.1      | chr6_97001177-97001177_T_C          | 728L>S   | Substitution | Nonsynonymous coding | 28% |
| MM14T | WDFY3   | WD repeat and FYVE domain containing 3                               | CCDS3609.1      | chr4_85711005-85711015_GCGAGCCACGC_ | NA       | Deletion     | Frameshift           | 36% |
| MM14T | ZAP70   | zeta-chain (TCR) associated protein kinase 70kDa                     | CCDS33254.1     | chr2_98354542-98354542_G_A          | 570A>T   | Substitution | Nonsynonymous coding | 48% |
| MM14T | ZNF57   | zinc finger protein 57                                               | CCDS12098.1     | chr19_2916207-2916207_T_C           | 88C>R    | Substitution | Nonsynonymous coding | 94% |
| MM15T | AMER1   | APC membrane recruitment protein 1                                   | CCDS14377.2     | chrX_63410804-63410804_C_T          | 788C>Y   | Substitution | Nonsynonymous coding | 21% |
| MM15T | COL21A1 | collagen, type XXI, alpha 1                                          | NM_030820       | chr6_56033015-56033015_T_G          | 369Q>H   | Substitution | Nonsynonymous coding | 14% |
| MM15T | CPAMD8  | C3 and PZP-like, alpha-2-macroglobulin domain containing 8           | CCDS42519.1     | chr19_17086920-17086920_C_G         | 647E>D   | Substitution | Nonsynonymous coding | 27% |
| MM15T | DPP10   | dipeptidyl-peptidase 10 (non-functional)                             | CCDS46400.1     | chr2_116599913-116599913_G_A        | 795D>N   | Substitution | Nonsynonymous coding | 18% |
| MM15T | ETV2    | ets variant 2                                                        | NM_014209       | chr19_36133516-36133516_G_C         | _ISV-1>  | Substitution | Splice site acceptor | 27% |
| MM15T | FBXW7   | F-box and WD repeat domain containing 7, E3 ubiquitin protein ligase | CCDS3777.1      | chr4_153250924-153250924_T_G        | 379H>P   | Substitution | Nonsynonymous coding | 50% |
| MM15T | GLI3    | GLI family zinc finger 3                                             | CCDS5465.1      | chr7_42262788-42262788_T_A          | 22K>M    | Substitution | Nonsynonymous coding | 28% |
| MM15T | HK3     | hexokinase 3 (white cell)                                            | CCDS4407.1      | chr5_176317822-176317822_C_T        | _ISV+1>  | Substitution | Splice site donor    | 40% |
| MM15T | ITFG3   | integrin alpha FG-GAP repeat containing 3                            | CCDS10402.1     | chr16_304668-304668_T_C             | 86Y>H    | Substitution | Nonsynonymous coding | 32% |
| MM15T | KRAS    | v-Ki-ras2 Kirsten rat sarcoma viral oncogene homolog                 | CCDS8703.1      | chr12_25398284-25398284_C_T         | 12G>D    | Substitution | Nonsynonymous coding | 59% |
| MM15T | MITF    | microphthalmia-associated transcription factor                       | CCDS43106.1     | chr3_69928509-69928509_C_G          | 110T>R   | Substitution | Nonsynonymous coding | 77% |
| MM15T | NOTCH2  | notch 2                                                              | CCDS908.1       | chr1_120612003-120612004_GG_        | NA       | Deletion     | Frameshift           | 25% |
| MM15T | PRDM11  | PR domain containing 11                                              | CCDS7912.1      | chr11_45203391-45203391_C_G         | 59T>R    | Substitution | Nonsynonymous coding | 49% |
| MM15T | SAP130  | Sin3A-associated protein, 130kDa                                     | CCDS2153.1      | chr2_128712584-128712584_T_C        | 791M>V   | Substitution | Nonsynonymous coding | 54% |
| MM15T | SCP2D1  | SCP2 sterol-binding domain containing 1                              | CCDS13139.1     | chr20_18794541-18794541_G_T         | 28V>F    | Substitution | Nonsynonymous coding | 28% |
| MM15T | SEC24C  | SEC24 family, member C (S. cerevisiae)                               | CCDS7332.1      | chr10_75519456-75519456_C_T         | 129P>S   | Substitution | Nonsynonymous coding | 29% |

|       |          |                                                                       |                 |                                 |         |              |                      |     |
|-------|----------|-----------------------------------------------------------------------|-----------------|---------------------------------|---------|--------------|----------------------|-----|
| MM15T | SLC26A3  | solute carrier family 26, member 3                                    | CCDS5748.1      | chr7_107431671-107431671_G_A    | 131P>L  | Substitution | Nonsynonymous coding | 11% |
| MM15T | TG       | thyroglobulin                                                         | CCDS34944.1     | chr8_134042140-134042140_C_T    | 2371R>X | Substitution | Nonsense             | 28% |
| MM15T | TP53     | tumor protein p53                                                     | CCDS11118.1     | chr17_7578406-7578406_C_T       | 175R>H  | Substitution | Nonsynonymous coding | 69% |
| MM15T | WDFY3    | WD repeat and FYVE domain containing 3                                | CCDS3609.1      | chr4_85594083-85594083_G_T      | 3507Q>K | Substitution | Nonsynonymous coding | 22% |
| MM16T | ADAMT59  | ADAM metalloproteinase with thrombospondin type 1 motif, 9            | CCDS2903.1      | chr3_64672264-64672264_T_G      | 166I>L  | Substitution | Nonsynonymous coding | 10% |
| MM16T | ANKS3    | ankyrin repeat and sterile alpha motif domain containing 3            | CCDS10520.1     | chr16_4755225-4755225_C_T       | 247E>K  | Substitution | Nonsynonymous coding | 51% |
| MM16T | AR       | androgen receptor                                                     | CCDS14387.1     | chrX_66943546-66943546_C_G      | 876Q>E  | Substitution | Nonsynonymous coding | 24% |
| MM16T | BCL11B   | B-cell CLL/lymphoma 11B (zinc finger protein)                         | CCDS9950.1      | chr14_99697816-99697816_G_      | NA      | Deletion     | Frameshift           | 17% |
| MM16T | CCDC129  | coiled-coil domain containing 129                                     | CCDS5435.2      | chr7_31614356-31614356_G_A      | 200G>S  | Substitution | Nonsynonymous coding | 26% |
| MM16T | CDH19    | cadherin 19, type 2                                                   | CCDS11994.1     | chr18_64172366-64172366_G_A     | 668R>C  | Substitution | Nonsynonymous coding | 86% |
| MM16T | CPT1C    | carnitine palmitoyltransferase 1C                                     | ENST00000295404 | chr19_50213770-50213770_C_T     | 425P>L  | Substitution | Nonsynonymous coding | 45% |
| MM16T | FAM118A  | family with sequence similarity 118, member A                         | ENST00000405673 | chr22_45724286-45724286_C_G     | 179A>G  | Substitution | Nonsynonymous coding | 21% |
| MM16T | FBXW7    | F-box and WD repeat domain containing 7, E3 ubiquitin protein ligase  | CCDS3777.1      | chr4_153244131-153244131_T      | NA      | Insertion    | Frameshift           | 49% |
| MM16T | FRRS1    | ferric-chelate reductase 1                                            | CCDS30780.1     | chr1_100194079-100194079_T_C    | 326I>V  | Substitution | Nonsynonymous coding | 38% |
| MM16T | GGA3     | golgi-associated, gamma adaptin ear containing, ARF binding protein 3 | CCDS11717.1     | chr17_73236132-73236132_C_T     | 441A>T  | Substitution | Nonsynonymous coding | 31% |
| MM16T | GPR115   | G protein-coupled receptor 115                                        | CCDS4922.2      | chr6_47682367-47682367_C_A      | 462H>Q  | Substitution | Nonsynonymous coding | 28% |
| MM16T | IL23R    | interleukin 23 receptor                                               | CCDS637.1       | chr1_67633851-67633851_A_       | NA      | Deletion     | Frameshift           | 27% |
| MM16T | KCNA7    | potassium voltage-gated channel, shaker-related subfamily, member 7   | CCDS12755.1     | chr19_49573379-49573379_G_C     | 438P>A  | Substitution | Nonsynonymous coding | 31% |
| MM16T | KEL      | Kell blood group, metallo-endopeptidase                               | CCDS34766.1     | chr7_142658931-142658931_G_A    | 11P>L   | Substitution | Nonsynonymous coding | 49% |
| MM16T | KIAA1239 | uncharacterized protein                                               | CCDS47040.1     | chr4_37446254-37446254_A_C      | 882N>H  | Substitution | Nonsynonymous coding | 34% |
| MM16T | KIAA1383 | uncharacterized protein                                               | CCDS44334.1     | chr1_232941227-232941227_C_T    | 153S>L  | Substitution | Nonsynonymous coding | 57% |
| MM16T | KIF26B   | kinesin family member 26B                                             | CCDS44342.1     | chr1_245851227-245851227_G_A    | 1648A>T | Substitution | Nonsynonymous coding | 23% |
| MM16T | KIF27    | kinesin family member 27                                              | CCDS6665.1      | chr9_86452358-86452360_CCT_     | NA      | Deletion     | In-frame deletion    | 11% |
| MM16T | KRAS     | v-Ki-ras2 Kirsten rat sarcoma viral oncogene homolog                  | CCDS8703.1      | chr12_25398285-25398285_C_A     | 12G>C   | Substitution | Nonsynonymous coding | 49% |
| MM16T | LARP4B   | La ribonucleoprotein domain family, member 4B                         | CCDS31131.1     | chr10_890938-890938_G_          | NA      | Deletion     | Frameshift           | 39% |
| MM16T | LRP2     | low density lipoprotein receptor-related protein 2                    | CCDS2232.1      | chr2_169989109-169989109_G_A    | 4568T>I | Substitution | Nonsynonymous coding | 69% |
| MM16T | MYH7     | myosin, heavy chain 7, cardiac muscle, beta                           | CCDS9601.1      | chr14_23889403-23889403_C_T     | 1126R>H | Substitution | Nonsynonymous coding | 45% |
| MM16T | OR4A16   | olfactory receptor, family 4, subfamily A, member 16                  | CCDS31499.1     | chr11_55111454-55111454_G_A     | 260V>I  | Substitution | Nonsynonymous coding | 83% |
| MM16T | PARP14   | poly (ADP-ribose) polymerase family, member 14                        | CCDS46894.1     | chr3_122446760-122446760_C_     | NA      | Deletion     | Frameshift           | 35% |
| MM16T | PLAGL1   | pleiomorphic adenoma gene-like 1                                      | CCDS5202.1      | chr6_144263744-144263744_G_A    | 70T>M   | Substitution | Nonsynonymous coding | 32% |
| MM16T | PLD3     | phospholipase D family, member 3                                      | CCDS33027.1     | chr19_40883776-40883781_ACGCGC_ | NA      | Deletion     | In-frame deletion    | 14% |
| MM16T | PPIE     | peptidylprolyl isomerase E (cyclophilin E)                            | CCDS443.1       | chr1_40204599-40204599_C_G      | 9Y>X    | Substitution | Nonsense             | 13% |



|       |         |                                                                               |                 |                              |         |              |                      |     |
|-------|---------|-------------------------------------------------------------------------------|-----------------|------------------------------|---------|--------------|----------------------|-----|
| MM16T | PPP2R1A | protein phosphatase 2, regulatory subunit A, alpha                            | CCDS12849.1     | chr19_52715974-52715974_T_G  | 180M>R  | Substitution | Nonsynonymous coding | 48% |
| MM16T | PPP4R4  | protein phosphatase 4, regulatory subunit 4                                   | CCDS9921.1      | chr14_94700023-94700023_T_C  | 184S>P  | Substitution | Nonsynonymous coding | 54% |
| MM16T | SMG9    | smg-9 homolog, nonsense mediated mRNA decay factor (C. elegans)               | CCDS33043.2     | chr19_44241806-44241806_G_A  | 313T>M  | Substitution | Nonsynonymous coding | 39% |
| MM16T | SPEN    | spen homolog, transcriptional regulator                                       | CCDS164.1       | chr1_16256454-16256454_A_C   | 1240K>T | Substitution | Nonsynonymous coding | 32% |
| MM16T | SRPK2   | SRSF protein kinase 2                                                         | CCDS34724.1     | chr7_104782615-104782615_G_T | 461F>L  | Substitution | Nonsynonymous coding | 37% |
| MM16T | STARD9  | StAR-related lipid transfer (START) domain containing 9                       | NM_020759       | chr15_42981079-42981079_A_G  | 2435R>G | Substitution | Nonsynonymous coding | 29% |
| MM16T | TENM1   | teneurin transmembrane protein 1                                              | CCDS14609.1     | chrX_123518394-123518394_C_G | 2122W>C | Substitution | Nonsynonymous coding | 84% |
| MM16T | TLR10   | toll-like receptor 10                                                         | CCDS3445.1      | chr4_38775719-38775719_T_A   | 498N>I  | Substitution | Nonsynonymous coding | 49% |
| MM16T | TP53    | tumor protein p53                                                             | CCDS11118.1     | chr17_7577153-7577153_C_A    | 262G>V  | Substitution | Nonsynonymous coding | 94% |
| MM16T | XYLT2   | xylosyltransferase II                                                         | CCDS11563.1     | chr17_48433239-48433239_G_T  | 396D>Y  | Substitution | Nonsynonymous coding | 14% |
| MM16T | ZP3     | zona pellucida glycoprotein 3 (sperm receptor)                                | CCDS47618.1     | chr7_76069661-76069663_GAG_  | NA      | Deletion     | Splice site donor    | 16% |
| MM17T | ACIN1   | apoptotic chromatin condensation inducer 1                                    | CCDS9587.1      | chr14_23549151-23549151_C_T  | 523D>N  | Substitution | Nonsynonymous coding | 48% |
| MM17T | ACSBG1  | acyl-CoA synthetase bubblegum family member 1                                 | CCDS10298.1     | chr15_78470955-78470955_C_A  | NA      | Substitution | Splice site donor    | 21% |
| MM17T | AKAP8L  | A kinase (PRKA) anchor protein 8-like                                         | CCDS46005.1     | chr19_15508058-15508058_T_G  | 480E>A  | Substitution | Nonsynonymous coding | 11% |
| MM17T | ARID5B  | AT rich interactive domain 5B (MRF1-like)                                     | CCDS31208.1     | chr10_63851941-63851941_G_T  | 907D>Y  | Substitution | Nonsynonymous coding | 45% |
| MM17T | AXIN2   | axin 2                                                                        | CCDS11662.1     | chr17_63554009-63554009_A_G  | 244S>P  | Substitution | Nonsynonymous coding | 48% |
| MM17T | BHLHE40 | basic helix-loop-helix family, member e40                                     | CCDS2565.1      | chr3_5024758-5024758_C_T     | 207S>F  | Substitution | Nonsynonymous coding | 48% |
| MM17T | BRCA2   | breast cancer 2, early onset                                                  | CCDS9344.1      | chr13_32914647-32914647_C_A  | 2052S>X | Substitution | Nonsense             | 94% |
| MM17T | CCDC74A | coiled-coil domain containing 74A                                             | ENST00000434330 | chr2_132287094-132287094_G_A | 37G>E   | Substitution | Nonsynonymous coding | 16% |
| MM17T | CELSR3  | cadherin, EGF LAG seven-pass G-type receptor 3 (flamingo homolog, Drosophila) | CCDS2775.1      | chr3_48677585-48677585_C_G   | 3145D>H | Substitution | Nonsynonymous coding | 17% |
| MM17T | CLK3    | CDC-like kinase 3                                                             | CCDS45304.1     | chr15_74918270-74918270_G_T  | 408V>F  | Substitution | Nonsynonymous coding | 24% |
| MM17T | COL6A3  | collagen, type VI, alpha 3                                                    | CCDS33412.1     | chr2_238272044-238272044_G_T | NA      | Substitution | Splice site acceptor | 86% |
| MM17T | CTNNA2  | catenin (cadherin-associated protein), alpha 2                                | CCDS42703.2     | chr2_80782821-80782821_A_G   | 515N>S  | Substitution | Nonsynonymous coding | 57% |
| MM17T | CUL9    | cullin 9                                                                      | CCDS4890.1      | chr6_43156381-43156381_C_T   | 703S>F  | Substitution | Nonsynonymous coding | 49% |
| MM17T | DMGDH   | dimethylglycine dehydrogenase                                                 | CCDS4044.1      | chr5_78326750-78326750_G_A   | 530A>V  | Substitution | Nonsynonymous coding | 14% |
| MM17T | DNAJC6  | Dnaj (Hsp40) homolog, subfamily C, member 6                                   | CCDS30739.1     | chr1_65831857-65831857_G_A   | 117R>Q  | Substitution | Nonsynonymous coding | 40% |
| MM17T | DZANK1  | double zinc ribbon and ankyrin repeat domains 1                               | CCDS46582.1     | chr20_18440911-18440911_C_G  | 50S>T   | Substitution | Nonsynonymous coding | 39% |
| MM17T | DZIP3   | DAZ interacting protein 3, zinc finger                                        | CCDS2952.1      | chr3_108363508-108363508_A_G | 547I>V  | Substitution | Nonsynonymous coding | 28% |
| MM17T | EEPD1   | endonuclease/exonuclease/phosphatase family domain containing 1               | CCDS34619.1     | chr7_36194279-36194279_C_G   | 116R>G  | Substitution | Nonsynonymous coding | 50% |
| MM17T | EPS8    | epidermal growth factor receptor pathway substrate 8                          | CCDS31753.1     | chr12_15814976-15814976_C_T  | 265R>H  | Substitution | Nonsynonymous coding | 49% |
| MM17T | FAM174A | family with sequence similarity 174, member A                                 | CCDS4090.1      | chr5_99871445-99871445_G_T   | 71A>S   | Substitution | Nonsynonymous coding | 43% |
| MM17T | FO XK1  | forkhead box K1                                                               | CCDS34591.1     | chr7_4800743-4800743_G_T     | 582G>V  | Substitution | Nonsynonymous coding | 52% |

|       |          |                                                                        |                 |                              |         |              |                      |     |
|-------|----------|------------------------------------------------------------------------|-----------------|------------------------------|---------|--------------|----------------------|-----|
| MM17T | HLA-DRB1 | major histocompatibility complex, class II, DR beta 1                  | CCDS47409.1     | chr6_32548544-32548544_T_G   | 248I>L  | Substitution | Nonsynonymous coding | 19% |
| MM17T | HMCN1    | hemicentin 1                                                           | CCDS30956.1     | chr1_186114995-186114995_G_A | 4850G>S | Substitution | Nonsynonymous coding | 44% |
| MM17T | IMPA2    | inositol(myo)-1(or 4)-monophosphatase 2                                | CCDS11855.1     | chr18_11981733-11981733_C_G  | 22A>G   | Substitution | Nonsynonymous coding | 17% |
| MM17T | ITPR2    | inositol 1,4,5-trisphosphate receptor, type 2                          | CCDS41764.1     | chr12_26775240-26775240_G_A  | 1074S>F | Substitution | Nonsynonymous coding | 47% |
| MM17T | ITPR3    | inositol 1,4,5-trisphosphate receptor, type 3                          | CCDS4783.1      | chr6_33654232-33654232_C_A   | 1972A>E | Substitution | Nonsynonymous coding | 40% |
| MM17T | MDN1     | MDN1, midasin homolog (yeast)                                          | CCDS5024.1      | chr6_90361988-90361988_C_G   | 5280D>H | Substitution | Nonsynonymous coding | 39% |
| MM17T | MTHFSD   | methenyltetrahydrofolate synthetase domain containing                  | CCDS42211.1     | chr16_86575799-86575799_C_G  | 154E>Q  | Substitution | Nonsynonymous coding | 48% |
| MM17T | MYO10    | myosin X                                                               | NM_012334       | chr5_16764364-16764364_A_T   | 441F>I  | Substitution | Nonsynonymous coding | 21% |
| MM17T | NDUF53   | NADH dehydrogenase (ubiquinone) Fe-S protein 3, 30kDa (NADH-coenzyme Q | CCDS7941.1      | chr11_47602517-47602517_C_G  | 121T>S  | Substitution | Nonsynonymous coding | 30% |
| MM17T | NPFRR1   | neuropeptide FF receptor 1                                             | ENST00000277942 | chr10_72015528-72015528_C_G  | 160V>L  | Substitution | Nonsynonymous coding | 20% |
| MM17T | OR5R1    | olfactory receptor, family 5, subfamily R, member 1                    | CCDS31530.1     | chr11_56185462-56185462_C_T  | 83V>M   | Substitution | Nonsynonymous coding | 22% |
| MM17T | OTOF     | otoferlin                                                              | CCDS1725.1      | chr2_26698238-26698238_G_T   | 1039Q>K | Substitution | Nonsynonymous coding | 34% |
| MM17T | PCDH15   | protocadherin-related 15                                               | CCDS44400.1     | chr10_55570388-55570388_C_A  | 1494C>F | Substitution | Nonsynonymous coding | 35% |
| MM17T | PCNXL2   | pecanex-like 2 (Drosophila)                                            | CCDS44335.1     | chr1_233275584-233275584_A_G | 1179W>R | Substitution | Nonsynonymous coding | 31% |
| MM17T | PDE1C    | phosphodiesterase 1C, calmodulin-dependent 70kDa                       | CCDS5437.1      | chr7_31918723-31918723_T_A   | 104D>V  | Substitution | Nonsynonymous coding | 32% |
| MM17T | PDE4DIP  | phosphodiesterase 4D interacting protein                               | CCDS30826.1     | chr1_144931168-144931168_C_G | 181E>Q  | Substitution | Nonsynonymous coding | 23% |
| MM17T | PEX11B   | peroxisomal biogenesis factor 11 beta                                  | CCDS917.1       | chr1_145522815-145522815_G_A | 226G>S  | Substitution | Nonsynonymous coding | 56% |
| MM17T | PIK3R1   | phosphoinositide-3-kinase, regulatory subunit 1 (alpha)                | CCDS3993.1      | chr5_67593395-67593395_T     | NA      | Insertion    | Frameshift           | 41% |
| MM17T | PLCL2    | phospholipase C-like 2                                                 | CCDS33713.1     | chr3_17051959-17051959_CA    | NA      | Insertion    | Frameshift           | 31% |
| MM17T | PP2D1    | protein phosphatase 2C-like domain containing 1                        | ENST00000389050 | chr3_20043147-20043147_C_A   | 155R>S  | Substitution | Nonsynonymous coding | 18% |
| MM17T | PRR12    | proline rich 12                                                        | CCDS46143.1     | chr19_50099424-50099424_G_T  | 611G>V  | Substitution | Nonsynonymous coding | 33% |
| MM17T | PTEN     | phosphatase and tensin homolog                                         | NM_000314       | chr10_89711993-89711993_C_G  | 204P>R  | Substitution | Nonsynonymous coding | 85% |
| MM17T | QSOX1    | quiescinq Q6 sulfhydryl oxidase 1                                      | CCDS1337.1      | chr1_180158780-180158780_T_C | 371F>L  | Substitution | Nonsynonymous coding | 14% |
| MM17T | RAD51C   | RAD51 homolog C (S. cerevisiae)                                        | CCDS11611.1     | chr17_56770090-56770090_C_T  | 29S>F   | Substitution | Nonsynonymous coding | 55% |
| MM17T | RARB     | retinoic acid receptor, beta                                           | ENST00000404969 | chr3_25216037-25216037_C_T   | 50P>L   | Substitution | Nonsynonymous coding | 67% |
| MM17T | RGL2     | ral guanine nucleotide dissociation stimulator-like 2                  | CCDS4774.1      | chr6_33260971-33260971_G_A   | 610P>L  | Substitution | Nonsynonymous coding | 19% |
| MM17T | SARNP    | SAP domain containing ribonucleoprotein                                | CCDS8892.1      | chr12_56182893-56182893_C_T  | 156R>K  | Substitution | Nonsynonymous coding | 32% |
| MM17T | SELENBP1 | selenium binding protein 1                                             | CCDS5995.1      | chr1_151341497-151341497_C   | NA      | Deletion     | Frameshift           | 59% |
| MM17T | SERPINB5 | serpin peptidase inhibitor, clade B (ovalbumin), member 5              | CCDS32839.1     | chr18_61170668-61170668_A_T  | 281M>L  | Substitution | Nonsynonymous coding | 26% |
| MM17T | SIGLECS  | sialic acid binding Ig-like lectin 5                                   | CCDS33088.1     | chr19_52115595-52115595_T_A  | 515Q>H  | Substitution | Nonsynonymous coding | 28% |
| MM17T | ST3GAL1  | ST3 beta-galactoside alpha-2,3-sialyltransferase 1                     | CCDS6373.1      | chr8_134477117-134477117_C_T | 196R>Q  | Substitution | Nonsynonymous coding | 22% |
| MM17T | SUPV3L1  | suppressor of var1, 3-like 1 (S. cerevisiae)                           | CCDS7287.1      | chr10_70946225-70946225_A_T  | 126S>C  | Substitution | Nonsynonymous coding | 45% |

|       |          |                                                                         |                 |                               |         |              |                      |     |
|-------|----------|-------------------------------------------------------------------------|-----------------|-------------------------------|---------|--------------|----------------------|-----|
| MM17T | TAPBPL   | TAP binding protein-like                                                | CCDS8546.1      | chr12_6566767-6566767_C_T     | 254T>I  | Substitution | Nonsynonymous coding | 14% |
| MM17T | TBATA    | thymus, brain and testes associated                                     | CCDS7308.1      | chr10_72541623-72541623_G_A   | 71R>C   | Substitution | Nonsynonymous coding | 54% |
| MM17T | TCF7     | transcription factor 7 (T-cell specific, HMG-box)                       | CCDS4169.1      | chr5_133473813-133473813_C_G  | 169P>A  | Substitution | Nonsynonymous coding | 33% |
| MM17T | TCF7     | transcription factor 7 (T-cell specific, HMG-box)                       | CCDS4169.1      | chr5_133478567-133478567_G_A  | 304G>D  | Substitution | Nonsynonymous coding | 36% |
| MM17T | TIMELESS | timeless circadian clock                                                | CCDS8918.1      | chr12_56817237-56817237_G_A   | 705R>X  | Substitution | Nonsense             | 52% |
| MM17T | TP53     | tumor protein p53                                                       | CCDS11118.1     | chr17_7577570-7577570_C_A     | 237M>I  | Substitution | Nonsynonymous coding | 82% |
| MM17T | TTC29    | tetratricopeptide repeat domain 29                                      | CCDS47141.1     | chr4_147830331-147830331_C_A  | 83E>X   | Substitution | Nonsense             | 86% |
| MM17T | URB1     | URB1 ribosome biogenesis 1 homolog (S. cerevisiae)                      | CCDS46645.1     | chr21_33706593-33706593_C_G   | 1579S>T | Substitution | Nonsynonymous coding | 42% |
| MM17T | URB1     | URB1 ribosome biogenesis 1 homolog (S. cerevisiae)                      | CCDS46645.1     | chr21_33721687-33721687_C_G   | 980E>Q  | Substitution | Nonsynonymous coding | 43% |
| MM17T | WDR72    | WD repeat domain 72                                                     | CCDS10151.1     | chr15_53998261-53998261_C_T   | 322R>H  | Substitution | Nonsynonymous coding | 47% |
| MM17T | ZBTB48   | zinc finger and BTB domain containing 48                                | CCDS84.1        | chr1_6647696-6647696_C_G      | NA      | Substitution | Splice site donor    | 16% |
| MM17T | ZNF17    | zinc finger protein 17                                                  | CCDS42636.1     | chr19_57932079-57932079_G_T   | NA      | Insertion    | Frameshift           | 21% |
| MM17T | ZNF41    | zinc finger protein 41                                                  | CCDS14279.1     | chrX_47315674-47315674_C_T    | 66V>M   | Substitution | Nonsynonymous coding | 51% |
| MM18T | MARCH3   | membrane-associated ring finger (C3HC4) 3, E3 ubiquitin protein ligase  | CCDS4141.1      | chr5_126213945-126213945_G_A  | 179R>W  | Substitution | Nonsynonymous coding | 23% |
| MM18T | MARCH3   | membrane-associated ring finger (C3HC4) 3, E3 ubiquitin protein ligase  | CCDS4141.1      | chr5_126253842-126253842_G_T  | 8H>N    | Substitution | Nonsynonymous coding | 13% |
| MM18T | MARCH6   | membrane-associated ring finger (C3HC4) 6, E3 ubiquitin protein ligase  | CCDS34135.1     | chr5_10405770-10405770_G_A    | 478R>Q  | Substitution | Nonsynonymous coding | 17% |
| MM18T | MARCH6   | membrane-associated ring finger (C3HC4) 6, E3 ubiquitin protein ligase  | CCDS34135.1     | chr5_10400949-10400949_G_T    | 323E>X  | Substitution | Nonsense             | 13% |
| MM18T | MARCH8   | membrane-associated ring finger (C3HC4) 8, E3 ubiquitin protein ligase  | CCDS7213.1      | chr10_45953743-45953743_T_G   | 274N>H  | Substitution | Nonsynonymous coding | 11% |
| MM18T | MARCH10  | membrane-associated ring finger (C3HC4) 10, E3 ubiquitin protein ligase | CCDS11635.1     | chr17_60814328-60814328_G_T   | 301L>M  | Substitution | Nonsynonymous coding | 11% |
| MM18T | SEPT3    | septin 3                                                                | CCDS14027.2     | chr22_42390736-42390736_G_T   | 343E>D  | Substitution | Nonsynonymous coding | 14% |
| MM18T | SEPT8    | septin 8                                                                | CCDS43358.1     | chr5_132099413-132099413_C_A  | 173K>N  | Substitution | Nonsynonymous coding | 13% |
| MM18T | SEPT11   | septin 11                                                               | CCDS34018.1     | chr4_77917591-77917591_G_A    | 14R>Q   | Substitution | Nonsynonymous coding | 15% |
| MM18T | SEPT12   | septin 12                                                               | CCDS10522.1     | chr16_4837574-4837574_C_T     | 25E>K   | Substitution | Nonsynonymous coding | 19% |
| MM18T | A2M      | alpha-2-macroglobulin                                                   | CCDS44827.1     | chr12_9254181-9254181_G_T     | 452F>L  | Substitution | Nonsynonymous coding | 11% |
| MM18T | A3GALT2P | alpha 1,3-galactosyltransferase 2, pseudogene                           | ENST00000330379 | chr1_33772467-33772467_G_A    | 308S>L  | Substitution | Nonsynonymous coding | 10% |
| MM18T | A4GNT    | alpha-1,4-N-acetylglucosaminyltransferase                               | CCDS3097.1      | chr3_137849765-137849765_C_A  | 112D>Y  | Substitution | Nonsynonymous coding | 11% |
| MM18T | AACS     | acetoacetyl-CoA synthetase                                              | CCDS9263.1      | chr12_125576071-125576071_T_C | ISV+2>  | Substitution | Splice site donor    | 19% |
| MM18T | AADAT    | aminoadipate aminotransferase                                           | CCDS3814.1      | chr4_171009605-171009605_T_C  | 60T>A   | Substitution | Nonsynonymous coding | 14% |
| MM18T | AARS2    | alanyl-tRNA synthetase 2, mitochondrial                                 | CCDS34464.1     | chr6_44280914-44280914_G_T    | 49F>L   | Substitution | Nonsynonymous coding | 17% |
| MM18T | ABAT     | 4-aminobutyrate aminotransferase                                        | CCDS10534.1     | chr16_8866677-8866677_C_T     | 286T>M  | Substitution | Nonsynonymous coding | 15% |
| MM18T | ABCA1    | ATP-binding cassette, sub-family A (ABC1), member 1                     | ENST00000423487 | chr9_107618122-107618122_C_A  | 323R>I  | Substitution | Nonsynonymous coding | 17% |
| MM18T | ABCA12   | ATP-binding cassette, sub-family A (ABC1), member 12                    | ENST00000412081 | chr2_215940284-215940284_A_   | NA      | Deletion     | Frameshift           | 14% |

|       |        |                                                                      |                 |                               |         |              |                      |     |
|-------|--------|----------------------------------------------------------------------|-----------------|-------------------------------|---------|--------------|----------------------|-----|
| MM18T | ABCA12 | ATP-binding cassette, sub-family A (ABC1), member 12                 | CCDS33372.1     | chr2_215882767-215882767_A_C  | 583L>V  | Substitution | Nonsynonymous coding | 11% |
| MM18T | ABCA13 | ATP-binding cassette, sub-family A (ABC1), member 13                 | CCDS47584.1     | chr7_48314131-48314131_A_C    | 1623E>A | Substitution | Nonsynonymous coding | 13% |
| MM18T | ABCA13 | ATP-binding cassette, sub-family A (ABC1), member 13                 | CCDS47584.1     | chr7_48318453-48318453_C_A    | 2554F>L | Substitution | Nonsynonymous coding | 11% |
| MM18T | ABCA13 | ATP-binding cassette, sub-family A (ABC1), member 13                 | CCDS47584.1     | chr7_48391981-48391981_G_T    | 3529D>Y | Substitution | Nonsynonymous coding | 13% |
| MM18T | ABCA13 | ATP-binding cassette, sub-family A (ABC1), member 13                 | CCDS47584.1     | chr7_48428697-48428697_T_C    | 3845V>A | Substitution | Nonsynonymous coding | 10% |
| MM18T | ABCA13 | ATP-binding cassette, sub-family A (ABC1), member 13                 | CCDS47584.1     | chr7_48494730-48494730_G_A    | 4221R>H | Substitution | Nonsynonymous coding | 22% |
| MM18T | ABCA2  | ATP-binding cassette, sub-family A (ABC1), member 2                  | CCDS43909.1     | chr9_139906995-139906995_G_A  | 1710S>L | Substitution | Nonsynonymous coding | 27% |
| MM18T | ABCA3  | ATP-binding cassette, sub-family A (ABC1), member 3                  | CCDS10466.1     | chr16_2374412-2374412_G_T     | 147P>Q  | Substitution | Nonsynonymous coding | 10% |
| MM18T | ABCA4  | ATP-binding cassette, sub-family A (ABC1), member 4                  | CCDS747.1       | chr1_94461744-94461744_A_G    | 2246V>A | Substitution | Nonsynonymous coding | 16% |
| MM18T | ABCA5  | ATP-binding cassette, sub-family A (ABC1), member 5                  | CCDS11685.1     | chr17_67282420-67282420_T_G   | 692K>Q  | Substitution | Nonsynonymous coding | 10% |
| MM18T | ABCA6  | ATP-binding cassette, sub-family A (ABC1), member 6                  | CCDS11683.1     | chr17_67129949-67129949_C_A   | 208K>N  | Substitution | Nonsynonymous coding | 12% |
| MM18T | ABCA7  | ATP-binding cassette, sub-family A (ABC1), member 7                  | CCDS12055.1     | chr19_1056372-1056372_T_C     | 1487V>A | Substitution | Nonsynonymous coding | 12% |
| MM18T | ABCA7  | ATP-binding cassette, sub-family A (ABC1), member 7                  | CCDS12055.1     | chr19_1058181-1058181_T_G     | 1688F>V | Substitution | Nonsynonymous coding | 10% |
| MM18T | ABCA8  | ATP-binding cassette, sub-family A (ABC1), member 8                  | CCDS11680.1     | chr17_66899515-66899515_G_A   | 802R>X  | Substitution | Nonsense             | 11% |
| MM18T | ABCA9  | ATP-binding cassette, sub-family A (ABC1), member 9                  | CCDS11681.1     | chr17_66982315-66982315_C_T   | 1400A>T | Substitution | Nonsynonymous coding | 16% |
| MM18T | ABCA9  | ATP-binding cassette, sub-family A (ABC1), member 9                  | CCDS11681.1     | chr17_67039853-67039853_C_T   | 193A>T  | Substitution | Nonsynonymous coding | 11% |
| MM18T | ABCA9  | ATP-binding cassette, sub-family A (ABC1), member 9                  | CCDS11681.1     | chr17_67047181-67047181_C_A   | 29Q>H   | Substitution | Nonsynonymous coding | 11% |
| MM18T | ABC84  | ATP-binding cassette, sub-family B (MDR/TAP), member 4               | CCDS5606.1      | chr7_87041263-87041263_C_T    | 957R>Q  | Substitution | Nonsynonymous coding | 13% |
| MM18T | ABC84  | ATP-binding cassette, sub-family B (MDR/TAP), member 4               | CCDS5606.1      | chr7_87047909-87047909_T_G    | 808N>H  | Substitution | Nonsynonymous coding | 11% |
| MM18T | ABC85  | ATP-binding cassette, sub-family B (MDR/TAP), member 5               | NM_001163941    | chr7_20685623-20685623__A     | NA      | Insertion    | Frameshift           | 11% |
| MM18T | ABC85  | ATP-binding cassette, sub-family B (MDR/TAP), member 5               | CCDS5371.1      | chr7_20721180-20721180_G_A    | 142R>Q  | Substitution | Nonsynonymous coding | 15% |
| MM18T | ABC85  | ATP-binding cassette, sub-family B (MDR/TAP), member 5               | CCDS5371.1      | chr7_20721269-20721269_T_G    | 172Y>D  | Substitution | Nonsynonymous coding | 12% |
| MM18T | ABC87  | ATP-binding cassette, sub-family B (MDR/TAP), member 7               | CCDS14428.1     | chrX_74291502-74291502_C_A    | 351R>I  | Substitution | Nonsynonymous coding | 11% |
| MM18T | ABC88  | ATP-binding cassette, sub-family B (MDR/TAP), member 8               | CCDS5913.1      | chr7_150739111-150739111_G_A  | 561D>N  | Substitution | Nonsynonymous coding | 11% |
| MM18T | ABC89  | ATP-binding cassette, sub-family B (MDR/TAP), member 9               | CCDS9241.1      | chr12_123424795-123424795_C_T | 536A>T  | Substitution | Nonsynonymous coding | 17% |
| MM18T | ABCC13 | ATP-binding cassette, sub-family C (CFTR/MRP), member 13, pseudogene | ENST00000400574 | chr21_15651966-15651966_C_A   | 39S>Y   | Substitution | Nonsynonymous coding | 13% |
| MM18T | ABCC2  | ATP-binding cassette, sub-family C (CFTR/MRP), member 2              | CCDS7484.1      | chr10_101559106-101559106_T_G | 337F>C  | Substitution | Nonsynonymous coding | 11% |
| MM18T | ABCC2  | ATP-binding cassette, sub-family C (CFTR/MRP), member 2              | CCDS7484.1      | chr10_101595975-101595975_G_A | 1181R>Q | Substitution | Nonsynonymous coding | 15% |
| MM18T | ABCC2  | ATP-binding cassette, sub-family C (CFTR/MRP), member 2              | CCDS7484.1      | chr10_101579014-101579014_G_T | 870E>X  | Substitution | Nonsense             | 21% |
| MM18T | ABCC3  | ATP-binding cassette, sub-family C (CFTR/MRP), member 3              | CCDS32681.1     | chr17_48761085-48761085_G_T   | 1308D>Y | Substitution | Nonsynonymous coding | 12% |
| MM18T | ABCC4  | ATP-binding cassette, sub-family C (CFTR/MRP), member 4              | CCDS9474.1      | chr13_95686931-95686931_C_A   | 1266E>D | Substitution | Nonsynonymous coding | 10% |
| MM18T | ABCC4  | ATP-binding cassette, sub-family C (CFTR/MRP), member 4              | CCDS9474.1      | chr13_95724037-95724037_C_T   | 1030R>H | Substitution | Nonsynonymous coding | 16% |

|       |             |                                                                                                                    |                 |                               |         |              |                      |     |
|-------|-------------|--------------------------------------------------------------------------------------------------------------------|-----------------|-------------------------------|---------|--------------|----------------------|-----|
| MM18T | ABCC5       | ATP-binding cassette, sub-family C (CFTR/MRP), member 5                                                            | CCDS43176.1     | chr3_183670876-183670876_C_T  | 889G>R  | Substitution | Nonsynonymous coding | 37% |
| MM18T | ABCC6       | ATP-binding cassette, sub-family C (CFTR/MRP), member 6                                                            | CCDS10568.1     | chr16_16259697-16259697_C_T   | 1030R>Q | Substitution | Nonsynonymous coding | 15% |
| MM18T | ABCC6       | ATP-binding cassette, sub-family C (CFTR/MRP), member 6                                                            | CCDS10568.1     | chr16_16276663-16276663_C_T   | 690E>K  | Substitution | Nonsynonymous coding | 26% |
| MM18T | ABCC6       | ATP-binding cassette, sub-family C (CFTR/MRP), member 6                                                            | CCDS10568.1     | chr16_16276663-16276663_C_A   | 690E>X  | Substitution | Nonsense             | 14% |
| MM18T | ABCC8       | ATP-binding cassette, sub-family C (CFTR/MRP), member 8                                                            | CCDS31437.1     | chr11_17416722-17416722_G_T   | 1470L>I | Substitution | Nonsynonymous coding | 14% |
| MM18T | ABCC9       | ATP-binding cassette, sub-family C (CFTR/MRP), member 9                                                            | CCDS8693.1      | chr12_21960410-21960410_G_A   | 1440A>V | Substitution | Nonsynonymous coding | 11% |
| MM18T | ABCF3       | ATP-binding cassette, sub-family F (GCN20), member 3                                                               | CCDS3254.1      | chr3_183911466-183911466_C_T  | 704R>C  | Substitution | Nonsynonymous coding | 20% |
| MM18T | ABHD1       | abhydrolase domain containing 1                                                                                    | CCDS1736.1      | chr2_27351935-27351935_G_A    | 133G>D  | Substitution | Nonsynonymous coding | 10% |
| MM18T | ABHD10      | abhydrolase domain containing 10                                                                                   | CCDS2963.1      | chr3_111710335-111710335_T_G  | 230L>V  | Substitution | Nonsynonymous coding | 11% |
| MM18T | ABHD12      | abhydrolase domain containing 12                                                                                   | CCDS13172.1     | chr20_25282930-25282930_A_C   | 361F>C  | Substitution | Nonsynonymous coding | 11% |
| MM18T | ABHD12      | abhydrolase domain containing 12                                                                                   | CCDS13172.1     | chr20_25288634-25288634_G_A   | 279R>C  | Substitution | Nonsynonymous coding | 13% |
| MM18T | ABHD14A     | abhydrolase domain containing 14A                                                                                  | CCDS2843.1      | chr3_52014990-52014990_G_T    | 258D>Y  | Substitution | Nonsynonymous coding | 13% |
| MM18T | ABHD3       | abhydrolase domain containing 3                                                                                    | CCDS32802.1     | chr18_19236851-19236851_G_T   | 343S>Y  | Substitution | Nonsynonymous coding | 19% |
| MM18T | ABHD4       | abhydrolase domain containing 4                                                                                    | CCDS9572.1      | chr14_23072581-23072581_G_T   | 133E>D  | Substitution | Nonsynonymous coding | 10% |
| MM18T | ABI3        | ABI family, member 3                                                                                               | CCDS11546.1     | chr17_47299506-47299506_G_T   | 286D>Y  | Substitution | Nonsynonymous coding | 16% |
| MM18T | ABI3BP      | ABI family, member 3 (NESH) binding protein                                                                        | CCDS46880.1     | chr3_100570788-100570788__AA  | NA      | Insertion    | Splice site acceptor | 21% |
| MM18T | ABLIM1      | actin binding LIM protein 1                                                                                        | CCDS31289.1     | chr10_116245085-116245085_G_A | 50R>X   | Substitution | Nonsense             | 14% |
| MM18T | ABTB1       | ankyrin repeat and BTB (POZ) domain containing 1                                                                   | CCDS3045.1      | chr3_127399260-127399260_C_T  | 460A>V  | Substitution | Nonsynonymous coding | 17% |
| MM18T | AC006547.14 | uncharacterized protein LOC388849 [Source:RefSeq peptide;Acc:NP_001230466]                                         | ENST00000439765 | chr22_20136278-20136278_G_T   | 320R>S  | Substitution | Nonsynonymous coding | 15% |
| MM18T | AC007431.1  | Coiled-coil domain-containing protein ENSP00000299415 [Source:UniProtKB/Swiss- HCG1816075; Uncharacterized protein | ENST00000299415 | chr17_55822561-55822561_T_A   | 25S>C   | Substitution | Nonsynonymous coding | 12% |
| MM18T | AC007557.1  | [Source:UniProtKB/TrEMBL;Acc:C9J1J8]                                                                               | ENST00000456163 | chr2_217736269-217736269_G_T  | 75K>N   | Substitution | Nonsynonymous coding | 11% |
| MM18T | AC011239.1  | Uncharacterized protein [Source:UniProtKB/TrEMBL;Acc:C9JNN6]                                                       | ENST00000430988 | chr2_23746898-23746898__T     | NA      | Insertion    | Frameshift           | 11% |
| MM18T | AC011239.1  | Uncharacterized protein [Source:UniProtKB/TrEMBL;Acc:C9JNN6]                                                       | ENST00000430988 | chr2_23746948-23746948__T     | NA      | Insertion    | Frameshift           | 15% |
| MM18T | AC016251.1  | -                                                                                                                  | ENST00000378936 | chr15_96831553-96831553__T    | NA      | Insertion    | Frameshift           | 13% |
| MM18T | AC016251.1  | -                                                                                                                  | ENST00000378936 | chr15_96831440-96831440_A_G   | 74V>A   | Substitution | Nonsynonymous coding | 14% |
| MM18T | AC092535.1  | Uncharacterized protein [Source:UniProtKB/TrEMBL;Acc:E7EUI4]                                                       | ENST00000314552 | chr4_1194815-1194815_C_A      | 77Q>H   | Substitution | Nonsynonymous coding | 15% |
| MM18T | AC103681.1  | Uncharacterized protein [Source:UniProtKB/TrEMBL;Acc:H3BTB2]                                                       | ENST00000399269 | chr11_45234685-45234685_C_T   | 17S>L   | Substitution | Nonsynonymous coding | 12% |
| MM18T | AC114273.1  | -                                                                                                                  | ENST00000397365 | chr19_16146303-16146303_C_T   | 115A>V  | Substitution | Nonsynonymous coding | 14% |
| MM18T | AC114273.1  | -                                                                                                                  | ENST00000397365 | chr19_16146384-16146384_C_A   | 142S>Y  | Substitution | Nonsynonymous coding | 13% |
| MM18T | AC131971.1  | HCG1782999; PRO0943; Uncharacterized protein                                                                       | ENST00000332881 | chr11_3012326-3012326_A_T     | 21N>Y   | Substitution | Nonsynonymous coding | 13% |
| MM18T | ACAA1       | acetyl-CoA acyltransferase 1                                                                                       | CCDS2673.1      | chr3_38164573-38164573_C_A    | 414G>X  | Substitution | Nonsense             | 15% |
| MM18T | ACACA       | acetyl-CoA carboxylase alpha                                                                                       | CCDS42302.1     | chr17_35518703-35518703_G_A   | 1781P>S | Substitution | Nonsynonymous coding | 12% |

|       |        |                                                          |             |                               |         |              |                      |     |
|-------|--------|----------------------------------------------------------|-------------|-------------------------------|---------|--------------|----------------------|-----|
| MM18T | ACACA  | acetyl-CoA carboxylase alpha                             | CCDS42302.1 | chr17_35536280-35536280_T_C   | 1667D>G | Substitution | Nonsynonymous coding | 14% |
| MM18T | ACACB  | acetyl-CoA carboxylase beta                              | CCDS31898.1 | chr12_109675039-109675039_C_T | 1506R>C | Substitution | Nonsynonymous coding | 10% |
| MM18T | ACAD10 | acyl-CoA dehydrogenase family, member 10                 | CCDS44973.1 | chr12_112143554-112143554_G_A | 117V>M  | Substitution | Nonsynonymous coding | 11% |
| MM18T | ACAD10 | acyl-CoA dehydrogenase family, member 10                 | CCDS44973.1 | chr12_112165918-112165918_C_A | 436A>D  | Substitution | Nonsynonymous coding | 13% |
| MM18T | ACAD9  | acyl-CoA dehydrogenase family, member 9                  | CCDS3053.1  | chr3_128622947-128622947_A_C  | 334K>T  | Substitution | Nonsynonymous coding | 11% |
| MM18T | ACADL  | acyl-CoA dehydrogenase, long chain                       | CCDS2389.1  | chr2_211082806-211082806_A_G  | 85V>A   | Substitution | Nonsynonymous coding | 12% |
| MM18T | ACAN   | aggrecan                                                 | NM_013227   | chr15_89417638-89417638_A_G   | 2507T>A | Substitution | Nonsynonymous coding | 11% |
| MM18T | ACAP2  | ArfGAP with coiled-coil, ankyrin repeat and PH domains 2 | CCDS33924.1 | chr3_195009904-195009904_C_T  | 707G>E  | Substitution | Nonsynonymous coding | 13% |
| MM18T | ACAT1  | acetyl-CoA acetyltransferase 1                           | CCDS8339.1  | chr11_108018049-108018049_G_T | 406E>X  | Substitution | Nonsense             | 15% |
| MM18T | ACBD3  | acyl-CoA binding domain containing 3                     | CCDS1551.1  | chr1_226340165-226340165_G_T  | 416L>I  | Substitution | Nonsynonymous coding | 12% |
| MM18T | ACIN1  | apoptotic chromatin condensation inducer 1               | CCDS9587.1  | chr14_23530594-23530594_G_A   | 1171R>X | Substitution | Nonsense             | 18% |
| MM18T | ACMSD  | aminocarboxymuconate semialdehyde decarboxylase          | CCDS2173.2  | chr2_135616903-135616903_C_T  | 59R>C   | Substitution | Nonsynonymous coding | 12% |
| MM18T | ACO2   | aconitase 2, mitochondrial                               | CCDS14017.1 | chr22_41919904-41919904_G_A   | 481D>N  | Substitution | Nonsynonymous coding | 15% |
| MM18T | ACOT11 | acyl-CoA thioesterase 11                                 | CCDS592.1   | chr1_55073625-55073625_G_T    | 505V>F  | Substitution | Nonsynonymous coding | 20% |
| MM18T | ACOT8  | acyl-CoA thioesterase 8                                  | CCDS13378.1 | chr20_44483804-44483804_G_A   | 86R>W   | Substitution | Nonsynonymous coding | 18% |
| MM18T | ACOX1  | acyl-CoA oxidase 1, palmitoyl                            | CCDS11734.1 | chr17_73947534-73947534_C_T   | 357E>K  | Substitution | Nonsynonymous coding | 17% |
| MM18T | ACPP   | acid phosphatase, prostate                               | CCDS46916.1 | chr3_132063884-132063884_G_T  | 254E>D  | Substitution | Nonsynonymous coding | 18% |
| MM18T | ACSBG2 | acyl-CoA synthetase bubblegum family member 2            | CCDS12159.1 | chr19_6161277-6161277_C_T     | 187P>S  | Substitution | Nonsynonymous coding | 14% |
| MM18T | ACSF3  | acyl-CoA synthetase family member 3                      | CCDS10974.1 | chr16_89180770-89180770_C_T   | 334A>V  | Substitution | Nonsynonymous coding | 17% |
| MM18T | ACSL4  | acyl-CoA synthetase long-chain family member 4           | CCDS14548.1 | chrX_108906520-108906520_G_T  | 542S>Y  | Substitution | Nonsynonymous coding | 12% |
| MM18T | ACSM1  | acyl-CoA synthetase medium-chain family member 1         | CCDS10587.1 | chr16_20648741-20648741_C_A   | 383K>N  | Substitution | Nonsynonymous coding | 18% |
| MM18T | ACSM1  | acyl-CoA synthetase medium-chain family member 1         | CCDS10587.1 | chr16_20673185-20673185_T_G   | 308K>T  | Substitution | Nonsynonymous coding | 15% |
| MM18T | ACSM4  | acyl-CoA synthetase medium-chain family member 4         | CCDS44825.1 | chr12_7469857-7469857_G_T     | 249G>W  | Substitution | Nonsynonymous coding | 11% |
| MM18T | ACSS3  | acyl-CoA synthetase short-chain family member 3          | CCDS9022.1  | chr12_81472080-81472080_G_A   | 61E>K   | Substitution | Nonsynonymous coding | 13% |
| MM18T | ACSS3  | acyl-CoA synthetase short-chain family member 3          | CCDS9022.1  | chr12_81472195-81472195_C_T   | 99S>L   | Substitution | Nonsynonymous coding | 10% |
| MM18T | ACTC1  | actin, alpha, cardiac muscle 1                           | CCDS10041.1 | chr15_35086927-35086927_G_A   | 28A>V   | Substitution | Nonsynonymous coding | 13% |
| MM18T | ACTC1  | actin, alpha, cardiac muscle 1                           | CCDS10041.1 | chr15_35086973-35086973_C_T   | 13D>N   | Substitution | Nonsynonymous coding | 25% |
| MM18T | ACTN2  | actinin, alpha 2                                         | CCDS1613.1  | chr1_236902707-236902707_C_T  | 328R>W  | Substitution | Nonsynonymous coding | 25% |
| MM18T | ACTN3  | actinin, alpha 3 (gene/pseudogene)                       | NM_001104   | chr11_66325538-66325538_A_C   | 390K>T  | Substitution | Nonsynonymous coding | 10% |
| MM18T | ACTR3  | ARP3 actin-related protein 3 homolog (yeast)             | CCDS33277.1 | chr2_114714968-114714968_A_C  | 398K>T  | Substitution | Nonsynonymous coding | 14% |
| MM18T | ACTR5  | ARP5 actin-related protein 5 homolog (yeast)             | CCDS13308.1 | chr20_37396225-37396225_C_T   | 518R>W  | Substitution | Nonsynonymous coding | 10% |
| MM18T | ACTR6  | ARP6 actin-related protein 6 homolog (yeast)             | CCDS9074.1  | chr12_100617678-100617678_G_T | 392E>D  | Substitution | Nonsynonymous coding | 14% |

|       |          |                                                            |                 |                               |         |              |                      |     |
|-------|----------|------------------------------------------------------------|-----------------|-------------------------------|---------|--------------|----------------------|-----|
| MM18T | ACTR8    | ARP8 actin-related protein 8 homolog (yeast)               | CCDS2875.1      | chr3_53908375-53908375_C_T    | 310G>R  | Substitution | Nonsynonymous coding | 13% |
| MM18T | ACVR2A   | activin A receptor, type IIA                               | CCDS33301.1     | chr2_148684694-148684694_G_A  | 465D>N  | Substitution | Nonsynonymous coding | 14% |
| MM18T | ADAL     | adenosine deaminase-like                                   | CCDS32214.1     | chr15_43639253-43639253_G_T   | 198A>S  | Substitution | Nonsynonymous coding | 16% |
| MM18T | ADAM12   | ADAM metallopeptidase domain 12                            | CCDS7653.1      | chr10_127789672-127789672_G_A | 297R>C  | Substitution | Nonsynonymous coding | 11% |
| MM18T | ADAM12   | ADAM metallopeptidase domain 12                            | CCDS7653.1      | chr10_127967524-127967524_G_A | 74R>W   | Substitution | Nonsynonymous coding | 12% |
| MM18T | ADAM12   | ADAM metallopeptidase domain 12                            | CCDS7653.1      | chr10_127727906-127727906_G_A | 736R>X  | Substitution | Nonsense             | 11% |
| MM18T | ADAM19   | ADAM metallopeptidase domain 19                            | CCDS4338.1      | chr5_156923927-156923927_C_A  | 523E>D  | Substitution | Nonsynonymous coding | 17% |
| MM18T | ADAM32   | ADAM metallopeptidase domain 32                            | CCDS47846.1     | chr8_39022331-39022331_G_A    | 215E>K  | Substitution | Nonsynonymous coding | 18% |
| MM18T | ADAM8    | ADAM metallopeptidase domain 8                             | NM_001109       | chr10_135085771-135085771_C_T | 295D>N  | Substitution | Nonsynonymous coding | 18% |
| MM18T | ADAMTS12 | ADAM metallopeptidase with thrombospondin type 1 motif, 12 | CCDS34140.1     | chr5_33588853-33588853_G_A    | 906R>X  | Substitution | Nonsense             | 10% |
| MM18T | ADAMTS13 | ADAM metallopeptidase with thrombospondin type 1 motif, 13 | CCDS6970.1      | chr9_136302931-136302931_G_T  | 500D>Y  | Substitution | Nonsynonymous coding | 26% |
| MM18T | ADAMTS17 | ADAM metallopeptidase with thrombospondin type 1 motif, 17 | CCDS10383.1     | chr15_100882091-100882091_G_A | 5A>V    | Substitution | Nonsynonymous coding | 20% |
| MM18T | ADAMTS2  | ADAM metallopeptidase with thrombospondin type 1 motif, 2  | CCDS4444.1      | chr5_178541161-178541161_C_T  | 1115D>N | Substitution | Nonsynonymous coding | 16% |
| MM18T | ADAMTS2  | ADAM metallopeptidase with thrombospondin type 1 motif, 2  | CCDS4444.1      | chr5_178555079-178555079_T_G  | 833K>T  | Substitution | Nonsynonymous coding | 19% |
| MM18T | ADAMTS2  | ADAM metallopeptidase with thrombospondin type 1 motif, 2  | CCDS4444.1      | chr5_178557092-178557092_C_A  | 766K>N  | Substitution | Nonsynonymous coding | 12% |
| MM18T | ADAMTS20 | ADAM metallopeptidase with thrombospondin type 1 motif, 20 | ENST00000389420 | chr12_43822063-43822063_C_T   | 1309R>K | Substitution | Nonsynonymous coding | 16% |
| MM18T | ADAMTS20 | ADAM metallopeptidase with thrombospondin type 1 motif, 20 | ENST00000389420 | chr12_43840473-43840473_C_A   | 708D>Y  | Substitution | Nonsynonymous coding | 13% |
| MM18T | ADAMTS20 | ADAM metallopeptidase with thrombospondin type 1 motif, 20 | ENST00000389420 | chr12_43944735-43944735_C_T   | 144V>I  | Substitution | Nonsynonymous coding | 21% |
| MM18T | ADAMTS4  | ADAM metallopeptidase with thrombospondin type 1 motif, 4  | CCDS1223.1      | chr1_161166436-161166436_G_A  | 290R>C  | Substitution | Nonsynonymous coding | 10% |
| MM18T | ADAMTS5  | ADAM metallopeptidase with thrombospondin type 1 motif, 5  | CCDS13579.1     | chr21_28296881-28296881_G_C   | 762Q>E  | Substitution | Nonsynonymous coding | 18% |
| MM18T | ADAMTS5  | ADAM metallopeptidase with thrombospondin type 1 motif, 5  | CCDS13579.1     | chr21_28302208-28302208_T_G   | 741K>T  | Substitution | Nonsynonymous coding | 11% |
| MM18T | ADAMTS5  | ADAM metallopeptidase with thrombospondin type 1 motif, 5  | CCDS13579.1     | chr21_28304330-28304330_G_T   | 681S>Y  | Substitution | Nonsynonymous coding | 11% |
| MM18T | ADAMTS5  | ADAM metallopeptidase with thrombospondin type 1 motif, 5  | CCDS13579.1     | chr21_28306895-28306895_T_G   | 527M>L  | Substitution | Nonsynonymous coding | 12% |
| MM18T | ADAMTS6  | ADAM metallopeptidase with thrombospondin type 1 motif, 6  | CCDS3983.2      | chr5_64769445-64769445_G_A    | 19S>L   | Substitution | Nonsynonymous coding | 15% |
| MM18T | ADAMTS9  | ADAM metallopeptidase with thrombospondin type 1 motif, 9  | CCDS2903.1      | chr3_64607910-64607910_G_T    | 884H>N  | Substitution | Nonsynonymous coding | 16% |
| MM18T | ADAMTSL3 | ADAMTS-like 3                                              | CCDS10326.1     | chr15_84683336-84683336_C_A   | 1339S>Y | Substitution | Nonsynonymous coding | 13% |
| MM18T | ADAMTSL4 | ADAMTS-like 4                                              | CCDS955.1       | chr1_150526083-150526083_G_A  | 206A>T  | Substitution | Nonsynonymous coding | 15% |
| MM18T | ADCY1    | adenylate cyclase 1 (brain)                                | CCDS34631.1     | chr7_45717801-45717801_G_A    | 613V>I  | Substitution | Nonsynonymous coding | 13% |
| MM18T | ADCY10   | adenylate cyclase 10 (soluble)                             | CCDS1265.1      | chr1_167793907-167793907_C_A  | 1313D>Y | Substitution | Nonsynonymous coding | 13% |
| MM18T | ADCY10   | adenylate cyclase 10 (soluble)                             | CCDS1265.1      | chr1_167794068-167794068_G_A  | 1259S>L | Substitution | Nonsynonymous coding | 12% |
| MM18T | ADCY6    | adenylate cyclase 6                                        | CCDS8767.1      | chr12_49171008-49171008_G_T   | 419H>N  | Substitution | Nonsynonymous coding | 16% |
| MM18T | ADCY7    | adenylate cyclase 7                                        | CCDS10741.1     | chr16_50322217-50322217_G_A   | 43A>T   | Substitution | Nonsynonymous coding | 11% |

|       |           |                                                                        |             |                               |        |              |                      |     |
|-------|-----------|------------------------------------------------------------------------|-------------|-------------------------------|--------|--------------|----------------------|-----|
| MM18T | ADCY9     | adenylate cyclase 9                                                    | CCDS32382.1 | chr16_4027612-4027612_G_A     | 900S>L | Substitution | Nonsynonymous coding | 14% |
| MM18T | ADCY9     | adenylate cyclase 9                                                    | CCDS32382.1 | chr16_4057515-4057515_G_A     | 580R>C | Substitution | Nonsynonymous coding | 18% |
| MM18T | ADCY9     | adenylate cyclase 9                                                    | CCDS32382.1 | chr16_4164759-4164759_C_T     | 229E>K | Substitution | Nonsynonymous coding | 15% |
| MM18T | ADCY9     | adenylate cyclase 9                                                    | CCDS32382.1 | chr16_4165103-4165103_C_T     | 114R>H | Substitution | Nonsynonymous coding | 23% |
| MM18T | ADCYAP1R1 | adenylate cyclase activating polypeptide 1 (pituitary) receptor type I | CCDS5433.1  | chr7_31125035-31125035_G_A    | 216S>N | Substitution | Nonsynonymous coding | 11% |
| MM18T | ADD2      | adducin 2 (beta)                                                       | CCDS1906.1  | chr2_70922908-70922908_T_C    | 167H>R | Substitution | Nonsynonymous coding | 15% |
| MM18T | ADH1A     | alcohol dehydrogenase 1A (class I), alpha polypeptide                  | CCDS3648.1  | chr4_100208784-100208784_C_A  | 19K>N  | Substitution | Nonsynonymous coding | 24% |
| MM18T | ADH1C     | alcohol dehydrogenase 1C (class I), gamma polypeptide                  | NM_000669   | chr4_100266053-100266053_G_A  | 178S>L | Substitution | Nonsynonymous coding | 20% |
| MM18T | ADNP      | activity-dependent neuroprotector homeobox                             | CCDS13433.1 | chr20_49509883-49509883__A    | NA     | Insertion    | Frameshift           | 12% |
| MM18T | ADNP      | activity-dependent neuroprotector homeobox                             | CCDS13433.1 | chr20_49510974-49510974_A_T   | 93F>I  | Substitution | Nonsynonymous coding | 13% |
| MM18T | ADNP2     | ADNP homeobox 2                                                        | CCDS32853.1 | chr18_77894001-77894001_G_T   | 235L>F | Substitution | Nonsynonymous coding | 11% |
| MM18T | ADNP2     | ADNP homeobox 2                                                        | CCDS32853.1 | chr18_77895649-77895649_C_A   | 785L>I | Substitution | Nonsynonymous coding | 18% |
| MM18T | ADORA2B   | adenosine A2b receptor                                                 | CCDS11173.1 | chr17_15878406-15878406_T_C   | 250V>A | Substitution | Nonsynonymous coding | 14% |
| MM18T | ADORA3    | adenosine A3 receptor                                                  | CCDS839.1   | chr1_112042939-112042939_T_C  | 197Y>C | Substitution | Nonsynonymous coding | 14% |
| MM18T | ADPGK     | ADP-dependent glucokinase                                              | CCDS42057.1 | chr15_73045218-73045218_T_C   | 319T>A | Substitution | Nonsynonymous coding | 12% |
| MM18T | ADPRH     | ADP-ribosylarginine hydrolase                                          | CCDS2990.1  | chr3_119301022-119301022_G_T  | 2E>D   | Substitution | Nonsynonymous coding | 16% |
| MM18T | ADPRHL1   | ADP-ribosylhydrolase like 1                                            | CCDS9535.1  | chr13_114107563-114107563_C_T | 64A>T  | Substitution | Nonsynonymous coding | 21% |
| MM18T | ADPRM     | ADP-ribose/CDP-alcohol diphosphatase, manganese-dependent              | CCDS11159.2 | chr17_10608701-10608701_T_C   | 153V>A | Substitution | Nonsynonymous coding | 10% |
| MM18T | ADRA1B    | adrenoceptor alpha 1B                                                  | CCDS4347.1  | chr5_159399131-159399131_C_T  | 399R>C | Substitution | Nonsynonymous coding | 16% |
| MM18T | ADRA2B    | adrenoceptor alpha 2B                                                  | NM_000682   | chr2_96781146-96781146_C_T    | 248G>E | Substitution | Nonsynonymous coding | 19% |
| MM18T | ADRB2     | adrenoceptor beta 2, surface                                           | CCDS4292.1  | chr5_148207005-148207005_C_T  | 204S>F | Substitution | Nonsynonymous coding | 12% |
| MM18T | ADRB3     | adrenoceptor beta 3                                                    | CCDS6099.1  | chr8_37823695-37823695_G_A    | 98A>V  | Substitution | Nonsynonymous coding | 11% |
| MM18T | ADRBK2    | adrenergic, beta, receptor kinase 2                                    | CCDS13832.1 | chr22_26118295-26118295_G_A   | 649E>K | Substitution | Nonsynonymous coding | 18% |
| MM18T | AFAP1     | actin filament associated protein 1                                    | CCDS47010.1 | chr4_7840334-7840334_G_C      | 215H>D | Substitution | Nonsynonymous coding | 22% |
| MM18T | AFAP1     | actin filament associated protein 1                                    | CCDS47010.1 | chr4_7873800-7873800_T_G      | 2E>D   | Substitution | Nonsynonymous coding | 15% |
| MM18T | AFF2      | AF4/FMR2 family, member 2                                              | CCDS14684.1 | chrX_147733596-147733596_G_A  | 42D>N  | Substitution | Nonsynonymous coding | 12% |
| MM18T | AFF2      | AF4/FMR2 family, member 2                                              | CCDS14684.1 | chrX_147743630-147743630_G_T  | 128D>Y | Substitution | Nonsynonymous coding | 14% |
| MM18T | AFF2      | AF4/FMR2 family, member 2                                              | CCDS14684.1 | chrX_148037779-148037779_C_T  | 735P>L | Substitution | Nonsynonymous coding | 14% |
| MM18T | AFFP      | alpha-fetoprotein                                                      | CCDS3556.1  | chr4_74306410-74306410_G_T    | 121R>I | Substitution | Nonsynonymous coding | 13% |
| MM18T | AGAP1     | ArfGAP with GTPase domain, ankyrin repeat and PH domain 1              | CCDS33408.1 | chr2_236653427-236653427_G_A  | 161R>Q | Substitution | Nonsynonymous coding | 23% |
| MM18T | AGAP2     | ArfGAP with GTPase domain, ankyrin repeat and PH domain 2              | CCDS44932.1 | chr12_58122154-58122154_C_T   | 855R>H | Substitution | Nonsynonymous coding | 17% |
| MM18T | AGBL1     | ATP/GTP binding protein-like 1                                         | NM_152336   | chr15_86697688-86697688_A_C   | 51E>A  | Substitution | Nonsynonymous coding | 15% |



|       |        |                                                                         |                 |                               |         |              |                      |     |
|-------|--------|-------------------------------------------------------------------------|-----------------|-------------------------------|---------|--------------|----------------------|-----|
| MM18T | AGBL1  | ATP/GTP binding protein-like 1                                          | NM_152336       | chr15_86822871-86822871_A_T   | 647N>Y  | Substitution | Nonsynonymous coding | 12% |
| MM18T | AGBL3  | ATP/GTP binding protein-like 3                                          | CCDS47718.1     | chr7_134678284-134678284_G_T  | 55Q>H   | Substitution | Nonsynonymous coding | 10% |
| MM18T | AGBL4  | ATP/GTP binding protein-like 4                                          | CCDS44137.1     | chr1_50317178-50317178_C_A    | 16G>V   | Substitution | Nonsynonymous coding | 15% |
| MM18T | AGFG1  | ArfGAP with FG repeats 1                                                | CCDS46533.1     | chr2_228395827-228395827_G_T  | 239D>Y  | Substitution | Nonsynonymous coding | 11% |
| MM18T | AGFG2  | ArfGAP with FG repeats 2                                                | CCDS5697.1      | chr7_100161838-100161838_T_C  | ISV-3>  | Substitution | Splice site acceptor | 16% |
| MM18T | AGGF1  | angiogenic factor with G patch and FHA domains 1                        | CCDS4035.1      | chr5_76330279-76330279_A_G    | 83N>D   | Substitution | Nonsynonymous coding | 11% |
| MM18T | AGL    | amylo-alpha-1, 6-glucosidase, 4-alpha-glucanotransferase                | CCDS759.1       | chr1_100343220-100343220_G_T  | 483E>X  | Substitution | Nonsense             | 21% |
| MM18T | AGPAT3 | 1-acylglycerol-3-phosphate O-acyltransferase 3                          | CCDS13703.1     | chr21_45401032-45401032_C_T   | 336L>F  | Substitution | Nonsynonymous coding | 13% |
| MM18T | AGPAT4 | 1-acylglycerol-3-phosphate O-acyltransferase 4                          | CCDS5280.1      | chr6_161587363-161587363_T_G  | 89N>H   | Substitution | Nonsynonymous coding | 15% |
| MM18T | AGTR1  | angiotensin II receptor, type 1                                         | CCDS3137.1      | chr3_148459061-148459061_C_A  | 80T>N   | Substitution | Nonsynonymous coding | 11% |
| MM18T | AGTR1  | angiotensin II receptor, type 1                                         | CCDS3137.1      | chr3_148459769-148459769_T_G  | 316L>R  | Substitution | Nonsynonymous coding | 11% |
| MM18T | AGTRAP | angiotensin II receptor-associated protein                              | ENST00000376627 | chr1_11804618-11804618_A_G    | 19H>R   | Substitution | Nonsynonymous coding | 21% |
| MM18T | AHNAK  | AHNAK nucleoprotein                                                     | CCDS31584.1     | chr11_62286374-62286374_T_C   | 5172D>G | Substitution | Nonsynonymous coding | 15% |
| MM18T | AHNAK  | AHNAK nucleoprotein                                                     | CCDS31584.1     | chr11_62285424-62285424_C_A   | 5489E>X | Substitution | Nonsense             | 14% |
| MM18T | AHNAK2 | AHNAK nucleoprotein 2                                                   | CCDS45177.1     | chr14_105420360-105420360_C_A | 476Q>H  | Substitution | Nonsynonymous coding | 13% |
| MM18T | AHNAK2 | AHNAK nucleoprotein 2                                                   | CCDS45177.1     | chr14_105407021-105407021_C_A | 4923E>X | Substitution | Nonsense             | 14% |
| MM18T | AHR    | aryl hydrocarbon receptor                                               | CCDS5366.1      | chr7_17378642-17378642_G_A    | 398R>Q  | Substitution | Nonsynonymous coding | 24% |
| MM18T | AHR    | aryl hydrocarbon receptor                                               | CCDS5366.1      | chr7_17378793-17378793_G_T    | 448K>N  | Substitution | Nonsynonymous coding | 16% |
| MM18T | AHSA2  | AHA1, activator of heat shock 90kDa protein ATPase homolog 2 (yeast)    | CCDS1868.1      | chr2_61413802-61413802_G_T    | 99E>X   | Substitution | Nonsense             | 18% |
| MM18T | AICDA  | activation-induced cytidine deaminase                                   | CCDS41747.1     | chr12_8757943-8757943_G_A     | 99R>X   | Substitution | Nonsense             | 17% |
| MM18T | AIF1   | allograft inflammatory factor 1                                         | CCDS4706.1      | chr6_31583916-31583916_G_A    | 64D>N   | Substitution | Nonsynonymous coding | 12% |
| MM18T | AIM1L  | absent in melanoma 1-like                                               | ENST00000374207 | chr1_26671971-26671971__T     | NA      | Insertion    | Splice site acceptor | 12% |
| MM18T | AIMP2  | aminoacyl tRNA synthetase complex-interacting multifunctional protein 2 | CCDS5344.1      | chr7_6057640-6057640_G_T      | 180D>Y  | Substitution | Nonsynonymous coding | 14% |
| MM18T | AJAP1  | adherens junctions associated protein 1                                 | CCDS54.1        | chr1_4832561-4832561_A_C      | 380Y>S  | Substitution | Nonsynonymous coding | 19% |
| MM18T | AK7    | adenylate kinase 7                                                      | CCDS9945.1      | chr14_96875212-96875212_A_C   | 144E>D  | Substitution | Nonsynonymous coding | 11% |
| MM18T | AK8    | adenylate kinase 8                                                      | CCDS6954.1      | chr9_135601125-135601125_C_T  | 464E>K  | Substitution | Nonsynonymous coding | 22% |
| MM18T | AK8    | adenylate kinase 8                                                      | CCDS6954.1      | chr9_135690035-135690035_C_A  | 323K>N  | Substitution | Nonsynonymous coding | 21% |
| MM18T | AK8    | adenylate kinase 8                                                      | CCDS6954.1      | chr9_135702409-135702409_C_T  | 197E>K  | Substitution | Nonsynonymous coding | 19% |
| MM18T | AKAP13 | A kinase (PRKA) anchor protein 13                                       | CCDS32320.1     | chr15_86064750-86064750_G_A   | 42R>H   | Substitution | Nonsynonymous coding | 11% |
| MM18T | AKAP14 | A kinase (PRKA) anchor protein 14                                       | CCDS14591.1     | chrX_119037322-119037322_G_A  | 46D>N   | Substitution | Nonsynonymous coding | 13% |
| MM18T | AKAP14 | A kinase (PRKA) anchor protein 14                                       | CCDS14591.1     | chrX_119054485-119054485_G_A  | 170R>H  | Substitution | Nonsynonymous coding | 13% |
| MM18T | AKAP3  | A kinase (PRKA) anchor protein 3                                        | CCDS8531.1      | chr12_4737307-4737307_G_A     | 254A>V  | Substitution | Nonsynonymous coding | 10% |

|       |            |                                                                                           |                 |                               |         |              |                      |     |
|-------|------------|-------------------------------------------------------------------------------------------|-----------------|-------------------------------|---------|--------------|----------------------|-----|
| MM18T | AKAP4      | A kinase (PRKA) anchor protein 4                                                          | CCDS14329.1     | chrX_49957082-49957082_A_G    | 761V>A  | Substitution | Nonsynonymous coding | 11% |
| MM18T | AKAP4      | A kinase (PRKA) anchor protein 4                                                          | CCDS14329.1     | chrX_49958696-49958696_C_T    | 223R>Q  | Substitution | Nonsynonymous coding | 11% |
| MM18T | AKAP6      | A kinase (PRKA) anchor protein 6                                                          | CCDS9644.1      | chr14_33165275-33165275_G_A   | 987D>N  | Substitution | Nonsynonymous coding | 19% |
| MM18T | AKAP6      | A kinase (PRKA) anchor protein 6                                                          | CCDS9644.1      | chr14_33293647-33293647_A_G   | 2210T>A | Substitution | Nonsynonymous coding | 13% |
| MM18T | AKAP9      | A kinase (PRKA) anchor protein (yotiao) 9                                                 | CCDS5622.1      | chr7_91632526-91632526_C_A    | 1099L>I | Substitution | Nonsynonymous coding | 14% |
| MM18T | AKAP9      | A kinase (PRKA) anchor protein (yotiao) 9                                                 | CCDS5622.1      | chr7_91726195-91726195_C_T    | 3308R>X | Substitution | Nonsense             | 11% |
| MM18T | AKD1       | adenylate kinase domain containing 1                                                      | NM_001145128    | chr6_109830545-109830545_A_C  | 1440L>V | Substitution | Nonsynonymous coding | 16% |
| MM18T | AKD1       | adenylate kinase domain containing 1                                                      | NM_001145128    | chr6_109854609-109854609_G_A  | 1139R>C | Substitution | Nonsynonymous coding | 13% |
| MM18T | AKR1B10    | aldo-keto reductase family 1, member B10 (aldose reductase)                               | CCDS5832.1      | chr7_134223753-134223753_G_A  | 298A>T  | Substitution | Nonsynonymous coding | 13% |
| MM18T | AKR1C2     | aldo-keto reductase family 1, member C2                                                   | CCDS7062.1      | chr10_5032201-5032201_G_T     | 320S>Y  | Substitution | Nonsynonymous coding | 21% |
| MM18T | AKR1C4     | aldo-keto reductase family 1, member C4                                                   | CCDS7064.1      | chr10_5258731-5258731_A_C     | 302N>H  | Substitution | Nonsynonymous coding | 13% |
| MM18T | AKT1       | v-akt murine thymoma viral oncogene homolog 1                                             | CCDS9994.1      | chr14_105243030-105243030_C_T | 85E>K   | Substitution | Nonsynonymous coding | 17% |
| MM18T | AKT2       | v-akt murine thymoma viral oncogene homolog 2                                             | CCDS12552.1     | chr19_40741894-40741894_C_T   | 360E>K  | Substitution | Nonsynonymous coding | 13% |
| MM18T | AL359878.1 | Uncharacterized protein [Source:UniProtKB/TrEMBL;Acc:E7EPV4]                              | ENST00000381466 | chr10_1018696-1018696_G_T     | 59S>Y   | Substitution | Nonsynonymous coding | 14% |
| MM18T | ALAS1      | aminolevulinate, delta-, synthase 1                                                       | CCDS2847.1      | chr3_52233438-52233438_A_G    | 61T>A   | Substitution | Nonsynonymous coding | 17% |
| MM18T | ALDH1A2    | aldehyde dehydrogenase 1 family, member A2                                                | CCDS10163.1     | chr15_58257949-58257949_G_T   | 292P>H  | Substitution | Nonsynonymous coding | 14% |
| MM18T | ALDH1A3    | aldehyde dehydrogenase 1 family, member A3                                                | CCDS10389.1     | chr15_101445875-101445875_C_T | 406R>W  | Substitution | Nonsynonymous coding | 11% |
| MM18T | ALDH1B1    | aldehyde dehydrogenase 1 family, member B1                                                | CCDS6615.1      | chr9_38396571-38396571_G_A    | 276D>N  | Substitution | Nonsynonymous coding | 20% |
| MM18T | ALDH1L1    | aldehyde dehydrogenase 1 family, member L1                                                | CCDS3034.1      | chr3_125824715-125824715_G_T  | 836S>Y  | Substitution | Nonsynonymous coding | 11% |
| MM18T | ALDH1L1    | aldehyde dehydrogenase 1 family, member L1                                                | CCDS3034.1      | chr3_125879797-125879797_C_T  | 9S>N    | Substitution | Nonsynonymous coding | 10% |
| MM18T | ALDH1L2    | aldehyde dehydrogenase 1 family, member L2                                                | CCDS31891.1     | chr12_105467784-105467784_C_A | ISV-1>  | Substitution | Splice site acceptor | 22% |
| MM18T | ALDH3A1    | aldehyde dehydrogenase 3 family, member A1                                                | CCDS11212.1     | chr17_19641680-19641680_T_C   | 435N>D  | Substitution | Nonsynonymous coding | 17% |
| MM18T | ALDH3B2    | aldehyde dehydrogenase 3 family, member B2                                                | CCDS31622.1     | chr11_67432881-67432881_T_C   | 194D>G  | Substitution | Nonsynonymous coding | 13% |
| MM18T | ALDH4A1    | aldehyde dehydrogenase 4 family, member A1                                                | CCDS188.1       | chr1_19209899-19209899_C_A    | 159E>D  | Substitution | Nonsynonymous coding | 17% |
| MM18T | ALDOA      | aldolase A, fructose-bisphosphate                                                         | CCDS10668.1     | chr16_30078808-30078808_G_T   | 50E>D   | Substitution | Nonsynonymous coding | 14% |
| MM18T | ALG12      | asparagine-linked glycosylation 12, alpha-1,6-mannosyltransferase homolog (S. cerevisiae) | CCDS14081.1     | chr22_50298024-50298024_C_T   | 375A>T  | Substitution | Nonsynonymous coding | 14% |
| MM18T | ALG13      | asparagine-linked glycosylation 13 homolog (S. cerevisiae)                                | ENST00000394780 | chrX_110970087-110970087_C_T  | 594R>X  | Substitution | Nonsense             | 19% |
| MM18T | ALG8       | asparagine-linked glycosylation 8, alpha-1,3-glucosyltransferase homolog (S. cerevisiae)  | CCDS8258.1      | chr11_77825024-77825024_G_A   | 229R>X  | Substitution | Nonsense             | 11% |
| MM18T | ALK        | anaplastic lymphoma receptor tyrosine kinase                                              | CCDS33172.1     | chr2_29541180-29541180_G_A    | 546S>F  | Substitution | Nonsynonymous coding | 11% |
| MM18T | ALKBH1     | alkB, alkylation repair homolog 1 (E. coli)                                               | CCDS32127.1     | chr14_78161109-78161109_G_T   | 143L>M  | Substitution | Nonsynonymous coding | 13% |
| MM18T | ALMS1      | Alstrom syndrome 1                                                                        | CCDS42697.1     | chr2_73646425-73646425_C_A    | 209L>I  | Substitution | Nonsynonymous coding | 13% |
| MM18T | ALOX12B    | arachidonate 12-lipoxygenase, 12R type                                                    | CCDS11129.1     | chr17_7983234-7983234_C_A     | 260E>D  | Substitution | Nonsynonymous coding | 22% |

|       |          |                                                                                        |              |                              |         |              |                      |     |
|-------|----------|----------------------------------------------------------------------------------------|--------------|------------------------------|---------|--------------|----------------------|-----|
| MM18T | ALOX15   | arachidonate 15-lipoxygenase                                                           | CCDS11049.1  | chr17_4544895-4544895_A_G    | 18S>P   | Substitution | Nonsynonymous coding | 11% |
| MM18T | ALOX5AP  | arachidonate 5-lipoxygenase-activating protein                                         | CCDS9337.1   | chr13_31309752-31309752_G_T  | 4E>X    | Substitution | Nonsense             | 10% |
| MM18T | ALOXE3   | arachidonate lipoxygenase 3                                                            | CCDS11130.1  | chr17_8015456-8015456_C_A    | 247D>Y  | Substitution | Nonsynonymous coding | 11% |
| MM18T | ALOXE3   | arachidonate lipoxygenase 3                                                            | CCDS11130.1  | chr17_8019002-8019002_T_G    | 119R>S  | Substitution | Nonsynonymous coding | 14% |
| MM18T | ALPK2    | alpha-kinase 2                                                                         | CCDS11966.2  | chr18_56203244-56203244_A_C  | 1392F>C | Substitution | Nonsynonymous coding | 10% |
| MM18T | ALPK2    | alpha-kinase 2                                                                         | CCDS11966.2  | chr18_56149272-56149272_C_A  | ISV-1>  | Substitution | Splice site acceptor | 15% |
| MM18T | ALS2     | amyotrophic lateral sclerosis 2 (juvenile)                                             | CCDS42800.1  | chr2_202609040-202609040_C_T | 704R>Q  | Substitution | Nonsynonymous coding | 11% |
| MM18T | ALS2     | amyotrophic lateral sclerosis 2 (juvenile)                                             | CCDS42800.1  | chr2_202626209-202626209_C_A | 170E>X  | Substitution | Nonsense             | 10% |
| MM18T | ALS2CL   | ALS2 C-terminal like                                                                   | CCDS2743.1   | chr3_46723555-46723555_T_G   | 380N>T  | Substitution | Nonsynonymous coding | 17% |
| MM18T | ALS2CR11 | amyotrophic lateral sclerosis 2 (juvenile) chromosome region, candidate 11             | NM_001168221 | chr2_202357715-202357715_A_C | 1117F>V | Substitution | Nonsynonymous coding | 15% |
| MM18T | AMBP     | alpha-1-microglobulin/bikunin precursor                                                | CCDS6800.1   | chr9_116823712-116823712_C_T | 282R>Q  | Substitution | Nonsynonymous coding | 10% |
| MM18T | AMER1    | APC membrane recruitment protein 1                                                     | CCDS14377.2  | chrX_63411216-63411216_C_T   | 651V>I  | Substitution | Nonsynonymous coding | 12% |
| MM18T | AMER1    | APC membrane recruitment protein 1                                                     | CCDS14377.2  | chrX_63411287-63411287_T_C   | 627E>G  | Substitution | Nonsynonymous coding | 14% |
| MM18T | AMER1    | APC membrane recruitment protein 1                                                     | CCDS14377.2  | chrX_63410358-63410358_C_A   | 937E>X  | Substitution | Nonsense             | 12% |
| MM18T | AMER2    | APC membrane recruitment protein 2                                                     | CCDS9312.1   | chr13_25744461-25744461_C_T  | 314D>N  | Substitution | Nonsynonymous coding | 15% |
| MM18T | AMER3    | APC membrane recruitment protein 3                                                     | CCDS2164.1   | chr2_131521457-131521457_G_T | 604E>D  | Substitution | Nonsynonymous coding | 14% |
| MM18T | AMIGO1   | adhesion molecule with Ig-like domain 1                                                | CCDS30795.1  | chr1_110050105-110050105_G_A | 477S>L  | Substitution | Nonsynonymous coding | 15% |
| MM18T | AMMECR1  | Alport syndrome, mental retardation, midface hypoplasia and elliptocytosis chromosomal | CCDS14551.1  | chrX_109507787-109507787_A_C | 172L>V  | Substitution | Nonsynonymous coding | 12% |
| MM18T | AMOT     | angiominin                                                                             | CCDS48154.1  | chrX_112025831-112025831_C_T | 726R>H  | Substitution | Nonsynonymous coding | 12% |
| MM18T | AMOT     | angiominin                                                                             | CCDS48154.1  | chrX_112048242-112048242_C_T | 570R>Q  | Substitution | Nonsynonymous coding | 16% |
| MM18T | ANGEL1   | angel homolog 1 (Drosophila)                                                           | CCDS9852.1   | chr14_77272994-77272994_G_A  | 382S>L  | Substitution | Nonsynonymous coding | 13% |
| MM18T | ANGPTL4  | angiopoietin-like 4                                                                    | CCDS12200.1  | chr19_8429458-8429458_G_T    | 85G>W   | Substitution | Nonsynonymous coding | 16% |
| MM18T | ANK1     | ankyrin 1, erythrocytic                                                                | CCDS47849.1  | chr8_41519453-41519453_G_A   | 1870R>C | Substitution | Nonsynonymous coding | 11% |
| MM18T | ANK1     | ankyrin 1, erythrocytic                                                                | CCDS47849.1  | chr8_41566399-41566399_G_A   | 665S>L  | Substitution | Nonsynonymous coding | 19% |
| MM18T | ANK1     | ankyrin 1, erythrocytic                                                                | CCDS47849.1  | chr8_41573337-41573337_G_A   | 512R>C  | Substitution | Nonsynonymous coding | 12% |
| MM18T | ANK1     | ankyrin 1, erythrocytic                                                                | CCDS47849.1  | chr8_41547849-41547849_G_A   | 1375R>X | Substitution | Nonsense             | 12% |
| MM18T | ANK2     | ankyrin 2, neuronal                                                                    | CCDS3702.1   | chr4_114277794-114277794_A   | NA      | Insertion    | Frameshift           | 23% |
| MM18T | ANK2     | ankyrin 2, neuronal                                                                    | CCDS3702.1   | chr4_114117612-114117612_C_A | 92S>Y   | Substitution | Nonsynonymous coding | 21% |
| MM18T | ANK2     | ankyrin 2, neuronal                                                                    | CCDS3702.1   | chr4_114274297-114274297_C_A | 1508S>Y | Substitution | Nonsynonymous coding | 21% |
| MM18T | ANK2     | ankyrin 2, neuronal                                                                    | CCDS3702.1   | chr4_114275124-114275124_C_T | 1784R>X | Substitution | Nonsense             | 19% |
| MM18T | ANK3     | ankyrin 3, node of Ranvier (ankyrin G)                                                 | CCDS7258.1   | chr10_61833191-61833191_G_A  | 2483S>L | Substitution | Nonsynonymous coding | 14% |
| MM18T | ANK3     | ankyrin 3, node of Ranvier (ankyrin G)                                                 | CCDS7258.1   | chr10_61833429-61833429_G_A  | 2404P>S | Substitution | Nonsynonymous coding | 14% |

|       |          |                                                            |                 |                               |         |              |                      |     |
|-------|----------|------------------------------------------------------------|-----------------|-------------------------------|---------|--------------|----------------------|-----|
| MM18T | ANKDD1A  | ankyrin repeat and death domain containing 1A              | CCDS10197.2     | chr15_65235765-65235765_A_G   | 351N>S  | Substitution | Nonsynonymous coding | 13% |
| MM18T | ANKDD1A  | ankyrin repeat and death domain containing 1A              | ENST00000395720 | chr15_65243168-65243168_G_T   | ISV-1>  | Substitution | Splice site acceptor | 11% |
| MM18T | ANKHD1   | ankyrin repeat and KH domain containing 1                  | CCDS4224.1      | chr5_139908926-139908926_G_A  | 2132R>Q | Substitution | Nonsynonymous coding | 11% |
| MM18T | ANKIB1   | ankyrin repeat and IBR domain containing 1                 | CCDS47639.1     | chr7_91957205-91957205_C_T    | 260R>X  | Substitution | Nonsense             | 15% |
| MM18T | ANKK1    | ankyrin repeat and kinase domain containing 1              | CCDS44734.1     | chr11_113270301-113270301_G_A | 537R>Q  | Substitution | Nonsynonymous coding | 10% |
| MM18T | ANKK1    | ankyrin repeat and kinase domain containing 1              | CCDS44734.1     | chr11_113270436-113270436_A_G | 582Y>C  | Substitution | Nonsynonymous coding | 12% |
| MM18T | ANKRA2   | ankyrin repeat, family A (RFXANK-like), 2                  | CCDS4020.1      | chr5_72858681-72858681_A_C    | 9I>S    | Substitution | Nonsynonymous coding | 13% |
| MM18T | ANKRD11  | ankyrin repeat domain 11                                   | CCDS32513.1     | chr16_89355030-89355030_G_A   | 217A>V  | Substitution | Nonsynonymous coding | 12% |
| MM18T | ANKRD13A | ankyrin repeat domain 13A                                  | CCDS9140.1      | chr12_110456221-110456221_G_A | 158D>N  | Substitution | Nonsynonymous coding | 13% |
| MM18T | ANKRD17  | ankyrin repeat domain 17                                   | CCDS34004.1     | chr4_73957962-73957962_C_T    | 1795D>N | Substitution | Nonsynonymous coding | 11% |
| MM18T | ANKRD17  | ankyrin repeat domain 17                                   | CCDS34004.1     | chr4_73985899-73985899_G_T    | 1335F>L | Substitution | Nonsynonymous coding | 10% |
| MM18T | ANKRD24  | ankyrin repeat domain 24                                   | CCDS45925.1     | chr19_4217303-4217303_G_T     | 716E>X  | Substitution | Nonsense             | 23% |
| MM18T | ANKRD27  | ankyrin repeat domain 27 (VPS9 domain)                     | CCDS32986.1     | chr19_33089229-33089229_G_T   | 992S>Y  | Substitution | Nonsynonymous coding | 14% |
| MM18T | ANKRD27  | ankyrin repeat domain 27 (VPS9 domain)                     | CCDS32986.1     | chr19_33135253-33135253_C_A   | 168R>I  | Substitution | Nonsynonymous coding | 13% |
| MM18T | ANKRD32  | ankyrin repeat domain 32                                   | CCDS4071.2      | chr5_93985303-93985303_G_T    | ISV+1>  | Substitution | Splice site donor    | 12% |
| MM18T | ANKRD33B | ankyrin repeat domain 33B                                  | CCDS47191.1     | chr5_10564856-10564856_G_A    | 93A>T   | Substitution | Nonsynonymous coding | 17% |
| MM18T | ANKRD35  | ankyrin repeat domain 35                                   | CCDS919.1       | chr1_145562459-145562459_G_T  | 716R>M  | Substitution | Nonsynonymous coding | 18% |
| MM18T | ANKRD40  | ankyrin repeat domain 40                                   | CCDS11572.1     | chr17_48774308-48774308_A_G   | 318L>S  | Substitution | Nonsynonymous coding | 20% |
| MM18T | ANKRD50  | ankyrin repeat domain 50                                   | CCDS34060.1     | chr4_125631336-125631336_G_T  | 111H>N  | Substitution | Nonsynonymous coding | 15% |
| MM18T | ANKRD6   | ankyrin repeat domain 6                                    | CCDS47460.1     | chr6_90315749-90315749_A_C    | 114E>D  | Substitution | Nonsynonymous coding | 12% |
| MM18T | ANKRD6   | ankyrin repeat domain 6                                    | CCDS47460.1     | chr6_90334305-90334305_G_T    | 422E>D  | Substitution | Nonsynonymous coding | 15% |
| MM18T | ANKRD6   | ankyrin repeat domain 6                                    | CCDS47460.1     | chr6_90340299-90340299_G_A    | 582R>Q  | Substitution | Nonsynonymous coding | 13% |
| MM18T | ANKS3    | ankyrin repeat and sterile alpha motif domain containing 3 | CCDS10520.1     | chr16_4748037-4748037_C_T     | 584R>Q  | Substitution | Nonsynonymous coding | 19% |
| MM18T | ANKS6    | ankyrin repeat and sterile alpha motif domain containing 6 | CCDS43856.1     | chr9_101518753-101518753_G_A  | 759R>W  | Substitution | Nonsynonymous coding | 23% |
| MM18T | ANKS6    | ankyrin repeat and sterile alpha motif domain containing 6 | CCDS43856.1     | chr9_101533304-101533304_G_A  | 616P>S  | Substitution | Nonsynonymous coding | 25% |
| MM18T | ANKS6    | ankyrin repeat and sterile alpha motif domain containing 6 | CCDS43856.1     | chr9_101552565-101552565_G_A  | 228P>L  | Substitution | Nonsynonymous coding | 24% |
| MM18T | ANLN     | anillin, actin binding protein                             | CCDS5447.1      | chr7_36446147-36446147_T_G    | 282L>W  | Substitution | Nonsynonymous coding | 13% |
| MM18T | ANO1     | anoctamin 1, calcium activated chloride channel            | CCDS44663.1     | chr11_69978163-69978163_C_A   | 412F>L  | Substitution | Nonsynonymous coding | 20% |
| MM18T | ANO1     | anoctamin 1, calcium activated chloride channel            | CCDS44663.1     | chr11_70031756-70031756_C_A   | 883F>L  | Substitution | Nonsynonymous coding | 18% |
| MM18T | ANO2     | anoctamin 2                                                | CCDS44807.1     | chr12_5672609-5672609_C_A     | 951E>D  | Substitution | Nonsynonymous coding | 15% |
| MM18T | ANO5     | anoctamin 5                                                | CCDS31444.1     | chr11_22291888-22291888_A_C   | 643K>N  | Substitution | Nonsynonymous coding | 11% |
| MM18T | ANO6     | anoctamin 6                                                | CCDS44865.1     | chr12_45695862-45695862_C_T   | 46R>X   | Substitution | Nonsense             | 13% |

|       |             |                                                                                         |                 |                               |         |              |                      |     |
|-------|-------------|-----------------------------------------------------------------------------------------|-----------------|-------------------------------|---------|--------------|----------------------|-----|
| MM18T | ANTXR2      | anthrax toxin receptor 2                                                                | CCDS47086.1     | chr4_80954664-80954664_A_G    | 253V>A  | Substitution | Nonsynonymous coding | 11% |
| MM18T | AOX1        | aldehyde oxidase 1                                                                      | CCDS33360.1     | chr2_201462156-201462156_T_G  | 79C>W   | Substitution | Nonsynonymous coding | 16% |
| MM18T | AOX1        | aldehyde oxidase 1                                                                      | CCDS33360.1     | chr2_201469430-201469430_G_T  | 227E>D  | Substitution | Nonsynonymous coding | 13% |
| MM18T | AOX1        | aldehyde oxidase 1                                                                      | CCDS33360.1     | chr2_201485455-201485455_A_C  | 596E>A  | Substitution | Nonsynonymous coding | 15% |
| MM18T | AP000322.54 | Uncharacterized protein ENSP00000386791 [Source:UniProtKB/Swiss-Prot;Acc:B9A014]        | ENST00000410005 | chr21_35773287-35773287_T_G   | 28Q>H   | Substitution | Nonsynonymous coding | 18% |
| MM18T | AP1G2       | adaptor-related protein complex 1, gamma 2 subunit                                      | CCDS9602.1      | chr14_24033573-24033573_G_A   | 316R>C  | Substitution | Nonsynonymous coding | 14% |
| MM18T | AP2M1       | adaptor-related protein complex 2, mu 1 subunit                                         | CCDS43177.1     | chr3_183894799-183894799_C_A  | 6F>L    | Substitution | Nonsynonymous coding | 17% |
| MM18T | AP4M1       | adaptor-related protein complex 4, mu 1 subunit                                         | CCDS5685.1      | chr7_99702696-99702696_T_G    | 234F>L  | Substitution | Nonsynonymous coding | 13% |
| MM18T | AP5M1       | adaptor-related protein complex 5, mu 1 subunit                                         | CCDS9729.1      | chr14_57741311-57741311_C_A   | 142L>I  | Substitution | Nonsynonymous coding | 12% |
| MM18T | APAF1       | apoptotic peptidase activating factor 1                                                 | CCDS9069.1      | chr12_99042156-99042156_A_C   | 7N>H    | Substitution | Nonsynonymous coding | 13% |
| MM18T | APAF1       | apoptotic peptidase activating factor 1                                                 | CCDS9069.1      | chr12_99042224-99042224_G_A   | 29M>I   | Substitution | Nonsynonymous coding | 12% |
| MM18T | APBB1       | amyloid beta (A4) precursor protein-binding, family B, member 1 (Fe65)                  | CCDS31410.1     | chr11_6432178-6432178_C_A     | 134G>X  | Substitution | Nonsense             | 16% |
| MM18T | APC         | adenomatous polyposis coli                                                              | CCDS4107.1      | chr5_112102945-112102945_C_T  | 94R>C   | Substitution | Nonsynonymous coding | 12% |
| MM18T | APC         | adenomatous polyposis coli                                                              | CCDS4107.1      | chr5_112174802-112174802_C_T  | 1171R>C | Substitution | Nonsynonymous coding | 12% |
| MM18T | APC         | adenomatous polyposis coli                                                              | CCDS4107.1      | chr5_112179153-112179153_C_T  | 2621S>F | Substitution | Nonsynonymous coding | 14% |
| MM18T | APC2        | adenomatosis polyposis coli 2                                                           | CCDS12068.1     | chr19_1453120-1453120_G_T     | 40E>D   | Substitution | Nonsynonymous coding | 13% |
| MM18T | APCDD1      | adenomatosis polyposis coli down-regulated 1                                            | CCDS11849.1     | chr18_10485735-10485735_G_A   | 351V>I  | Substitution | Nonsynonymous coding | 12% |
| MM18T | APH1B       | anterior pharynx defective 1 homolog B (C. elegans)                                     | CCDS10184.1     | chr15_63597847-63597847_C_T   | 214A>V  | Substitution | Nonsynonymous coding | 13% |
| MM18T | APOB        | apolipoprotein B (including Ag(x) antigen)                                              | CCDS1703.1      | chr2_21225092-21225092_T_C    | 4401Y>C | Substitution | Nonsynonymous coding | 14% |
| MM18T | APOB        | apolipoprotein B (including Ag(x) antigen)                                              | CCDS1703.1      | chr2_21225917-21225917_A_C    | 4126I>S | Substitution | Nonsynonymous coding | 10% |
| MM18T | APOB        | apolipoprotein B (including Ag(x) antigen)                                              | CCDS1703.1      | chr2_21235214-21235214_G_T    | 1509P>H | Substitution | Nonsynonymous coding | 15% |
| MM18T | APOBR       | apolipoprotein B receptor                                                               | NM_018690       | chr16_28507917-28507917_G_A   | 510D>N  | Substitution | Nonsynonymous coding | 17% |
| MM18T | APOF        | apolipoprotein F                                                                        | CCDS44923.1     | chr12_56755611-56755611_G_T   | 127L>I  | Substitution | Nonsynonymous coding | 12% |
| MM18T | APOL4       | apolipoprotein L, 4                                                                     | ENST00000352371 | chr22_36587520-36587520_T_C   | 219D>G  | Substitution | Nonsynonymous coding | 14% |
| MM18T | APPBP2      | amyloid beta precursor protein (cytoplasmic tail) binding protein 2                     | CCDS32699.1     | chr17_58525055-58525055_G_A   | 549R>W  | Substitution | Nonsynonymous coding | 11% |
| MM18T | APPL1       | adaptor protein, phosphotyrosine interaction, PH domain and leucine zipper containing 1 | CCDS2882.1      | chr3_57274571-57274571_G_A    | 122D>N  | Substitution | Nonsynonymous coding | 14% |
| MM18T | APPL1       | adaptor protein, phosphotyrosine interaction, PH domain and leucine zipper containing 1 | CCDS2882.1      | chr3_57283566-57283566_G_A    | 348D>N  | Substitution | Nonsynonymous coding | 21% |
| MM18T | APPL1       | adaptor protein, phosphotyrosine interaction, PH domain and leucine zipper containing 1 | CCDS2882.1      | chr3_57303587-57303587_C_T    | 668R>W  | Substitution | Nonsynonymous coding | 16% |
| MM18T | APPL2       | adaptor protein, phosphotyrosine interaction, PH domain and leucine zipper containing 2 | CCDS9101.1      | chr12_105583854-105583854_C_A | 441E>X  | Substitution | Nonsense             | 13% |
| MM18T | AQP6        | aquaporin 6, kidney specific                                                            | CCDS31798.1     | chr12_50369333-50369333_C_T   | 243A>V  | Substitution | Nonsynonymous coding | 14% |
| MM18T | AQR         | aquarius homolog (mouse)                                                                | CCDS42013.1     | chr15_35178842-35178842_A_G   | 901V>A  | Substitution | Nonsynonymous coding | 19% |
| MM18T | AQR         | aquarius homolog (mouse)                                                                | CCDS42013.1     | chr15_35210560-35210560_C_T   | 414R>Q  | Substitution | Nonsynonymous coding | 17% |

|       |          |                                                                                      |             |                              |         |              |                      |     |
|-------|----------|--------------------------------------------------------------------------------------|-------------|------------------------------|---------|--------------|----------------------|-----|
| MM18T | ARAP3    | ArfGAP with RhoGAP domain, ankyrin repeat and PH domain 3                            | CCDS4266.1  | chr5_141059977-141059977_C_T | 26R>Q   | Substitution | Nonsynonymous coding | 11% |
| MM18T | ARF3     | ADP-ribosylation factor 3                                                            | CCDS8774.1  | chr12_49333438-49333438_C_A  | 128Q>H  | Substitution | Nonsynonymous coding | 13% |
| MM18T | ARFGEF1  | ADP-ribosylation factor guanine nucleotide-exchange factor 1 (brefeldin A-inhibited) | CCDS6199.1  | chr8_68163639-68163639_C_A   | 915M>I  | Substitution | Nonsynonymous coding | 11% |
| MM18T | ARFGEF1  | ADP-ribosylation factor guanine nucleotide-exchange factor 1 (brefeldin A-inhibited) | CCDS6199.1  | chr8_68213528-68213528_G_T   | 81F>L   | Substitution | Nonsynonymous coding | 15% |
| MM18T | ARHGAP10 | Rho GTPase activating protein 10                                                     | CCDS34075.1 | chr4_148743880-148743880_C_A | 53L>M   | Substitution | Nonsynonymous coding | 18% |
| MM18T | ARHGAP17 | Rho GTPase activating protein 17                                                     | CCDS32409.1 | chr16_24980032-24980032_C_T  | 112E>K  | Substitution | Nonsynonymous coding | 15% |
| MM18T | ARHGAP17 | Rho GTPase activating protein 17                                                     | CCDS32409.1 | chr16_24981862-24981862_C_A  | 80E>X   | Substitution | Nonsense             | 11% |
| MM18T | ARHGAP18 | Rho GTPase activating protein 18                                                     | CCDS34535.1 | chr6_129932722-129932722_T_C | 360T>A  | Substitution | Nonsynonymous coding | 10% |
| MM18T | ARHGAP26 | Rho GTPase activating protein 26                                                     | CCDS4277.1  | chr5_142150451-142150451_A_G | 42D>G   | Substitution | Nonsynonymous coding | 17% |
| MM18T | ARHGAP29 | Rho GTPase activating protein 29                                                     | CCDS748.1   | chr1_94652141-94652141_C_T   | 565R>Q  | Substitution | Nonsynonymous coding | 11% |
| MM18T | ARHGAP31 | Rho GTPase activating protein 31                                                     | CCDS43135.1 | chr3_119128609-119128609_C_T | 638L>F  | Substitution | Nonsynonymous coding | 11% |
| MM18T | ARHGAP35 | Rho GTPase activating protein 35                                                     | CCDS46127.1 | chr19_47422062-47422062_C_T  | 44R>C   | Substitution | Nonsynonymous coding | 11% |
| MM18T | ARHGAP4  | Rho GTPase activating protein 4                                                      | CCDS14736.1 | chrX_153175280-153175280_C_T | 777E>K  | Substitution | Nonsynonymous coding | 15% |
| MM18T | ARHGAP4  | Rho GTPase activating protein 4                                                      | CCDS14736.1 | chrX_153184284-153184284_A_G | ISV+2>  | Substitution | Splice site donor    | 11% |
| MM18T | ARHGAP5  | Rho GTPase activating protein 5                                                      | CCDS32062.1 | chr14_32560623-32560623_C_T  | 250R>C  | Substitution | Nonsynonymous coding | 11% |
| MM18T | ARHGAP6  | Rho GTPase activating protein 6                                                      | CCDS14140.1 | chrX_11157461-11157461_G_A   | 816S>L  | Substitution | Nonsynonymous coding | 12% |
| MM18T | ARHGAP6  | Rho GTPase activating protein 6                                                      | CCDS14140.1 | chrX_11204422-11204422_G_T   | 403L>M  | Substitution | Nonsynonymous coding | 22% |
| MM18T | ARHGAP9  | Rho GTPase activating protein 9                                                      | CCDS8941.2  | chr12_57867923-57867923_T_C  | 607D>G  | Substitution | Nonsynonymous coding | 14% |
| MM18T | ARHGEF10 | Rho guanine nucleotide exchange factor (GEF) 10                                      | CCDS34794.1 | chr8_1904965-1904965_G_A     | 1191V>I | Substitution | Nonsynonymous coding | 22% |
| MM18T | ARHGEF17 | Rho guanine nucleotide exchange factor (GEF) 17                                      | CCDS8221.1  | chr11_73021803-73021803_G_A  | 707R>H  | Substitution | Nonsynonymous coding | 11% |
| MM18T | ARHGEF26 | Rho guanine nucleotide exchange factor (GEF) 26                                      | CCDS46938.1 | chr3_153840707-153840707_G_A | 309R>Q  | Substitution | Nonsynonymous coding | 11% |
| MM18T | ARHGEF4  | Rho guanine nucleotide exchange factor (GEF) 4                                       | CCDS2165.1  | chr2_131785535-131785535_C_A | 149L>M  | Substitution | Nonsynonymous coding | 16% |
| MM18T | ARHGEF40 | Rho guanine nucleotide exchange factor (GEF) 40                                      | CCDS32041.1 | chr14_21542204-21542204_C_A  | 105F>L  | Substitution | Nonsynonymous coding | 14% |
| MM18T | ARHGEF9  | Cdc42 guanine nucleotide exchange factor (GEF) 9                                     | CCDS35315.1 | chrX_62893976-62893976_C_T   | 289R>Q  | Substitution | Nonsynonymous coding | 16% |
| MM18T | ARID1A   | AT rich interactive domain 1A (SWI-like)                                             | CCDS285.1   | chr1_27087961-27087961_C_T   | 750R>X  | Substitution | Nonsense             | 19% |
| MM18T | ARID2    | AT rich interactive domain 2 (ARID, RFX-like)                                        | CCDS31783.1 | chr12_46245343-46245343_C_T  | 1146S>L | Substitution | Nonsynonymous coding | 10% |
| MM18T | ARID3C   | AT rich interactive domain 3C (BRIGHT-like)                                          | CCDS35006.1 | chr9_34623982-34623982_G_A   | 152R>C  | Substitution | Nonsynonymous coding | 15% |
| MM18T | ARID3C   | AT rich interactive domain 3C (BRIGHT-like)                                          | CCDS35006.1 | chr9_34624014-34624014_G_A   | 141A>V  | Substitution | Nonsynonymous coding | 26% |
| MM18T | ARID4A   | AT rich interactive domain 4A (RBP1-like)                                            | CCDS9732.1  | chr14_58831999-58831999_G_T  | 1064E>D | Substitution | Nonsynonymous coding | 11% |
| MM18T | ARID4B   | AT rich interactive domain 4B (RBP1-like)                                            | CCDS31061.1 | chr1_235345059-235345059_G_A | 1059R>X | Substitution | Nonsense             | 11% |
| MM18T | ARID5B   | AT rich interactive domain 5B (MRF1-like)                                            | CCDS31208.1 | chr10_63817051-63817051_G_A  | 341R>Q  | Substitution | Nonsynonymous coding | 19% |
| MM18T | ARL13B   | ADP-ribosylation factor-like 13B                                                     | CCDS2925.1  | chr3_93758725-93758725_A_C   | 231K>Q  | Substitution | Nonsynonymous coding | 24% |

|       |        |                                                                      |                 |                               |         |              |                      |     |
|-------|--------|----------------------------------------------------------------------|-----------------|-------------------------------|---------|--------------|----------------------|-----|
| MM18T | ARMC10 | armadillo repeat containing 10                                       | CCDS5728.1      | chr7_102724203-102724203_T_C  | 107S>P  | Substitution | Nonsynonymous coding | 13% |
| MM18T | ARMC10 | armadillo repeat containing 10                                       | CCDS5728.1      | chr7_102737788-102737788_G_A  | 257R>H  | Substitution | Nonsynonymous coding | 11% |
| MM18T | ARMC2  | armadillo repeat containing 2                                        | CCDS5069.2      | chr6_109294603-109294603_A_C  | 830K>N  | Substitution | Nonsynonymous coding | 10% |
| MM18T | ARMC8  | armadillo repeat containing 8                                        | NM_015396       | chr3_137991953-137991953_C_T  | 528R>C  | Substitution | Nonsynonymous coding | 13% |
| MM18T | ARMCX2 | armadillo repeat containing, X-linked 2                              | CCDS14490.1     | chrX_100912562-100912562_G_A  | 5R>W    | Substitution | Nonsynonymous coding | 19% |
| MM18T | ARNT2  | aryl-hydrocarbon receptor nuclear translocator 2                     | CCDS32307.1     | chr15_80762626-80762626_G_A   | 88D>N   | Substitution | Nonsynonymous coding | 15% |
| MM18T | ARRB1  | arrestin, beta 1                                                     | CCDS44684.1     | chr11_74985252-74985252_G_C   | 260D>E  | Substitution | Nonsynonymous coding | 15% |
| MM18T | ARSD   | arylsulfatase D                                                      | ENST00000458014 | chrX_2823097-2823097_G_T      | 148L>M  | Substitution | Nonsynonymous coding | 15% |
| MM18T | ARSD   | arylsulfatase D                                                      | CCDS35196.1     | chrX_2836164-2836164_T_A      | 182N>Y  | Substitution | Nonsynonymous coding | 10% |
| MM18T | ARSI   | arylsulfatase family, member I                                       | CCDS34275.1     | chr5_149676944-149676944_A_C  | 515F>V  | Substitution | Nonsynonymous coding | 14% |
| MM18T | ARSI   | arylsulfatase family, member I                                       | CCDS34275.1     | chr5_149676878-149676878_G_A  | 537R>X  | Substitution | Nonsense             | 18% |
| MM18T | ARVCF  | armadillo repeat gene deleted in velocardiofacial syndrome           | CCDS13771.1     | chr22_19978248-19978248_C_T   | 24E>K   | Substitution | Nonsynonymous coding | 21% |
| MM18T | AS3MT  | arsenic (+3 oxidation state) methyltransferase                       | CCDS41567.1     | chr10_104629955-104629955_G_T | 53E>X   | Substitution | Nonsense             | 11% |
| MM18T | ASAP1  | ArfGAP with SH3 domain, ankyrin repeat and PH domain 1               | CCDS6362.1      | chr8_131072826-131072826_G_A  | 1064T>M | Substitution | Nonsynonymous coding | 15% |
| MM18T | ASAP1  | ArfGAP with SH3 domain, ankyrin repeat and PH domain 1               | CCDS6362.1      | chr8_131193023-131193023_G_A  | 212R>C  | Substitution | Nonsynonymous coding | 14% |
| MM18T | ASAP2  | ArfGAP with SH3 domain, ankyrin repeat and PH domain 2               | CCDS1661.1      | chr2_9498929-9498929_G_A      | 458E>K  | Substitution | Nonsynonymous coding | 12% |
| MM18T | ASB15  | ankyrin repeat and SOCS box containing 15                            | CCDS34742.1     | chr7_123276892-123276892_C_T  | 542R>W  | Substitution | Nonsynonymous coding | 10% |
| MM18T | ASB16  | ankyrin repeat and SOCS box containing 16                            | CCDS11478.1     | chr17_42254320-42254320_C_T   | 262R>X  | Substitution | Nonsense             | 22% |
| MM18T | ASB7   | ankyrin repeat and SOCS box containing 7                             | CCDS10387.1     | chr15_101169792-101169792_A   | NA      | Insertion    | Frameshift           | 12% |
| MM18T | ASCC2  | activating signal cointegrator 1 complex subunit 2                   | CCDS13869.1     | chr22_30200645-30200645_C_A   | 445E>D  | Substitution | Nonsynonymous coding | 17% |
| MM18T | ASCC3  | activating signal cointegrator 1 complex subunit 3                   | CCDS5046.1      | chr6_101086541-101086541_G_A  | 1353S>L | Substitution | Nonsynonymous coding | 15% |
| MM18T | ASCC3  | activating signal cointegrator 1 complex subunit 3                   | CCDS5046.1      | chr6_101296046-101296046_C_A  | 260S>I  | Substitution | Nonsynonymous coding | 15% |
| MM18T | ASCC3  | activating signal cointegrator 1 complex subunit 3                   | CCDS5046.1      | chr6_101296131-101296131_T_G  | 232N>H  | Substitution | Nonsynonymous coding | 11% |
| MM18T | ASCC3  | activating signal cointegrator 1 complex subunit 3                   | CCDS5046.1      | chr6_100988267-100988267_A    | NA      | Insertion    | Splice site acceptor | 13% |
| MM18T | ASGR1  | asialoglycoprotein receptor 1                                        | CCDS11089.1     | chr17_7077055-7077055_C_T     | 267D>N  | Substitution | Nonsynonymous coding | 12% |
| MM18T | ASIC2  | acid-sensing (proton-gated) ion channel 2                            | CCDS11276.1     | chr17_31355268-31355268_T_C   | 377H>R  | Substitution | Nonsynonymous coding | 15% |
| MM18T | ASPHD2 | aspartate beta-hydroxylase domain containing 2                       | CCDS13834.2     | chr22_26829870-26829870_G_A   | 97D>N   | Substitution | Nonsynonymous coding | 17% |
| MM18T | ASPM   | asp (abnormal spindle) homolog, microcephaly associated (Drosophila) | CCDS1389.1      | chr1_197061173-197061173_C_A  | 3103R>I | Substitution | Nonsynonymous coding | 11% |
| MM18T | ASPCR1 | alveolar soft part sarcoma chromosome region, candidate 1            | CCDS11796.1     | chr17_79954361-79954361_C_A   | 191A>D  | Substitution | Nonsynonymous coding | 18% |
| MM18T | ATAD2  | ATPase family, AAA domain containing 2                               | CCDS6343.1      | chr8_124346560-124346560_G_A  | 1072R>C | Substitution | Nonsynonymous coding | 17% |
| MM18T | ATAD2  | ATPase family, AAA domain containing 2                               | CCDS6343.1      | chr8_124359422-124359422_G_T  | 708L>I  | Substitution | Nonsynonymous coding | 11% |
| MM18T | ATAD2B | ATPase family, AAA domain containing 2B                              | CCDS46227.1     | chr2_24021174-24021174_C_A    | 825R>I  | Substitution | Nonsynonymous coding | 11% |

|       |          |                                                                    |             |                               |         |              |                      |     |
|-------|----------|--------------------------------------------------------------------|-------------|-------------------------------|---------|--------------|----------------------|-----|
| MM18T | ATAD2B   | ATPase family, AAA domain containing 2B                            | CCDS46227.1 | chr2_24103565-24103565_C_A    | 282R>I  | Substitution | Nonsynonymous coding | 14% |
| MM18T | ATAD2B   | ATPase family, AAA domain containing 2B                            | CCDS46227.1 | chr2_24108655-24108655_C_T    | 206R>Q  | Substitution | Nonsynonymous coding | 13% |
| MM18T | ATAD5    | ATPase family, AAA domain containing 5                             | CCDS11260.1 | chr17_29162886-29162886_G_T   | 596R>I  | Substitution | Nonsynonymous coding | 12% |
| MM18T | ATAD5    | ATPase family, AAA domain containing 5                             | CCDS11260.1 | chr17_29196283-29196283_G_T   | 1111D>Y | Substitution | Nonsynonymous coding | 16% |
| MM18T | ATE1     | arginyltransferase 1                                               | CCDS31299.1 | chr10_123670557-123670557_C_A | 149E>D  | Substitution | Nonsynonymous coding | 17% |
| MM18T | ATE1     | arginyltransferase 1                                               | CCDS31299.1 | chr10_123687384-123687384_C_A | 27K>N   | Substitution | Nonsynonymous coding | 12% |
| MM18T | ATF6B    | activating transcription factor 6 beta                             | CCDS4737.1  | chr6_32083629-32083629_G_A    | 667R>X  | Substitution | Nonsense             | 13% |
| MM18T | ATG2A    | autophagy related 2A                                               | CCDS31602.1 | chr11_64675039-64675039_A_T   | 869W>R  | Substitution | Nonsynonymous coding | 10% |
| MM18T | ATG4A    | autophagy related 4A, cysteine peptidase                           | CCDS14538.1 | chrX_107374531-107374531_C_A  | 79L>I   | Substitution | Nonsynonymous coding | 13% |
| MM18T | ATG4B    | autophagy related 4B, cysteine peptidase                           | CCDS46564.1 | chr2_242598558-242598558_C_T  | 165A>V  | Substitution | Nonsynonymous coding | 14% |
| MM18T | ATG9A    | autophagy related 9A                                               | CCDS42820.1 | chr2_220089154-220089154_G_T  | 313F>L  | Substitution | Nonsynonymous coding | 14% |
| MM18T | ATG9A    | autophagy related 9A                                               | CCDS42820.1 | chr2_220092742-220092742_G_A  | 2A>V    | Substitution | Nonsynonymous coding | 11% |
| MM18T | ATL1     | atlastin GTPase 1                                                  | CCDS9700.1  | chr14_51079995-51079995_C_T   | 217R>X  | Substitution | Nonsense             | 10% |
| MM18T | ATM      | ataxia telangiectasia mutated                                      | CCDS31669.1 | chr11_108172519-108172519_C_A | ISV+3>  | Substitution | Splice site donor    | 15% |
| MM18T | ATOH1    | atonal homolog 1 (Drosophila)                                      | CCDS3638.1  | chr4_94750934-94750934_C_T    | 286S>L  | Substitution | Nonsynonymous coding | 23% |
| MM18T | ATP10B   | ATPase, class V, type 10B                                          | CCDS43394.1 | chr5_160044894-160044894_G_A  | 835R>C  | Substitution | Nonsynonymous coding | 13% |
| MM18T | ATP11C   | ATPase, class VI, type 11C                                         | CCDS14668.1 | chrX_138856897-138856897_C_T  | 726R>H  | Substitution | Nonsynonymous coding | 13% |
| MM18T | ATP11C   | ATPase, class VI, type 11C                                         | CCDS14668.1 | chrX_138856924-138856924_C_T  | 717R>Q  | Substitution | Nonsynonymous coding | 12% |
| MM18T | ATP11C   | ATPase, class VI, type 11C                                         | CCDS14668.1 | chrX_138879362-138879362_C_A  | 330K>N  | Substitution | Nonsynonymous coding | 11% |
| MM18T | ATP12A   | ATPase, H+/K+ transporting, nongastric, alpha polypeptide          | CCDS31948.1 | chr13_25281329-25281329_G_T   | 780G>C  | Substitution | Nonsynonymous coding | 13% |
| MM18T | ATP12A   | ATPase, H+/K+ transporting, nongastric, alpha polypeptide          | CCDS31948.1 | chr13_25255697-25255697_C_A   | ISV-3>  | Substitution | Splice site acceptor | 15% |
| MM18T | ATP13A3  | ATPase type 13A3                                                   | CCDS43187.1 | chr3_194169210-194169210_C_T  | 376V>I  | Substitution | Nonsynonymous coding | 10% |
| MM18T | ATP13A3  | ATPase type 13A3                                                   | CCDS43187.1 | chr3_194180243-194180243_T_G  | 146K>Q  | Substitution | Nonsynonymous coding | 10% |
| MM18T | ATP2A1   | ATPase, Ca++ transporting, cardiac muscle, fast twitch 1           | CCDS10643.1 | chr16_28911947-28911947_C_T   | 604R>C  | Substitution | Nonsynonymous coding | 11% |
| MM18T | ATP2B3   | ATPase, Ca++ transporting, plasma membrane 3                       | CCDS35440.1 | chrX_152814190-152814190_T_C  | 406C>R  | Substitution | Nonsynonymous coding | 17% |
| MM18T | ATP2B4   | ATPase, Ca++ transporting, plasma membrane 4                       | CCDS1440.1  | chr1_203682345-203682345_G_A  | 755R>Q  | Substitution | Nonsynonymous coding | 10% |
| MM18T | ATP2C1   | ATPase, Ca++ transporting, type 2C, member 1                       | CCDS33856.1 | chr3_130659476-130659476_A_C  | 121E>D  | Substitution | Nonsynonymous coding | 12% |
| MM18T | ATP2C1   | ATPase, Ca++ transporting, type 2C, member 1                       | CCDS33856.1 | chr3_130715617-130715617_T_G  | 740I>M  | Substitution | Nonsynonymous coding | 11% |
| MM18T | ATP4A    | ATPase, H+/K+ exchanging, alpha polypeptide                        | CCDS12467.1 | chr19_36046152-36046152_C_T   | 748A>T  | Substitution | Nonsynonymous coding | 17% |
| MM18T | ATP5O    | ATP synthase, H+ transporting, mitochondrial F1 complex, O subunit | CCDS13634.1 | chr21_35281461-35281461_G_A   | 85R>C   | Substitution | Nonsynonymous coding | 13% |
| MM18T | ATP6V0A1 | ATPase, H+ transporting, lysosomal V0 subunit a1                   | CCDS45683.1 | chr17_40642656-40642656_G_A   | ISV+1>  | Substitution | Splice site donor    | 11% |
| MM18T | ATP6V1B1 | ATPase, H+ transporting, lysosomal 56/58kDa, V1 subunit B1         | CCDS1912.1  | chr2_71187083-71187083_C_A    | 154P>T  | Substitution | Nonsynonymous coding | 12% |



|       |          |                                                                     |                 |                               |         |              |                      |     |
|-------|----------|---------------------------------------------------------------------|-----------------|-------------------------------|---------|--------------|----------------------|-----|
| MM18T | ATP7B    | ATPase, Cu++ transporting, beta polypeptide                         | CCDS41892.1     | chr13_52518279-52518279_G_A   | 1070P>L | Substitution | Nonsynonymous coding | 17% |
| MM18T | ATP7B    | ATPase, Cu++ transporting, beta polypeptide                         | ENST00000418097 | chr13_52549510-52549510_T_G   | 7L>F    | Substitution | Nonsynonymous coding | 12% |
| MM18T | ATP8A2   | ATPase, aminophospholipid transporter, class I, type 8A, member 2   | CCDS41873.1     | chr13_26129135-26129135_G_A   | 398D>N  | Substitution | Nonsynonymous coding | 10% |
| MM18T | ATP8A2   | ATPase, aminophospholipid transporter, class I, type 8A, member 2   | CCDS41873.1     | chr13_26413750-26413750_G_T   | 982A>S  | Substitution | Nonsynonymous coding | 16% |
| MM18T | ATP8B2   | ATPase, aminophospholipid transporter, class I, type 8B, member 2   | CCDS1066.1      | chr1_154316634-154316634_G_T  | 680A>S  | Substitution | Nonsynonymous coding | 12% |
| MM18T | ATP9A    | ATPase, class II, type 9A                                           | CCDS33489.1     | chr20_50225134-50225134_A_G   | 890F>L  | Substitution | Nonsynonymous coding | 15% |
| MM18T | ATP9A    | ATPase, class II, type 9A                                           | CCDS33489.1     | chr20_50273518-50273518_C_T   | 489E>K  | Substitution | Nonsynonymous coding | 13% |
| MM18T | ATPBD4   | ATP binding domain 4                                                | CCDS10043.1     | chr15_35834638-35834638_T_G   | 32N>H   | Substitution | Nonsynonymous coding | 11% |
| MM18T | ATRNL1   | attractin-like 1                                                    | CCDS7592.1      | chr10_117045811-117045811_A_C | 773K>N  | Substitution | Nonsynonymous coding | 12% |
| MM18T | ATRX     | alpha thalassemia/mental retardation syndrome X-linked              | CCDS14434.1     | chrX_76949354-76949354_C_T    | 148S>N  | Substitution | Nonsynonymous coding | 15% |
| MM18T | ATXN1    | ataxin 1                                                            | CCDS34342.1     | chr6_16327415-16327415_G_A    | 376S>L  | Substitution | Nonsynonymous coding | 10% |
| MM18T | ATXN1    | ataxin 1                                                            | CCDS34342.1     | chr6_16328523-16328523_G_A    | 7R>W    | Substitution | Nonsynonymous coding | 12% |
| MM18T | ATXN10   | ataxin 10                                                           | CCDS14070.1     | chr22_46136386-46136386_C_A   | 381L>M  | Substitution | Nonsynonymous coding | 11% |
| MM18T | ATXN7L1  | ataxin 7-like 1                                                     | CCDS47682.1     | chr7_105255055-105255055_C_T  | 576A>T  | Substitution | Nonsynonymous coding | 16% |
| MM18T | ATXN7L1  | ataxin 7-like 1                                                     | CCDS47682.1     | chr7_105260693-105260693_C_T  | 491A>T  | Substitution | Nonsynonymous coding | 16% |
| MM18T | ATXN7L2  | ataxin 7-like 2                                                     | CCDS30794.1     | chr1_110029632-110029632_G_T  | 101R>I  | Substitution | Nonsynonymous coding | 15% |
| MM18T | AUTS2    | autism susceptibility candidate 2                                   | CCDS5539.1      | chr7_70227938-70227938_G_T    | 275E>D  | Substitution | Nonsynonymous coding | 14% |
| MM18T | AUTS2    | autism susceptibility candidate 2                                   | ENST00000418686 | chr7_70250444-70250444_C_T    | 17S>F   | Substitution | Nonsynonymous coding | 12% |
| MM18T | AWAT1    | acyl-CoA wax alcohol acyltransferase 1                              | CCDS35321.1     | chrX_69458071-69458071_C_A    | 157S>Y  | Substitution | Nonsynonymous coding | 18% |
| MM18T | AWAT2    | acyl-CoA wax alcohol acyltransferase 2                              | NM_001002254    | chrX_69263793-69263793_C_T    | 84D>N   | Substitution | Nonsynonymous coding | 11% |
| MM18T | AXDND1   | axonemal dynein light chain domain containing 1                     | CCDS30948.1     | chr1_179339165-179339165_A_C  | 109K>T  | Substitution | Nonsynonymous coding | 10% |
| MM18T | AXDND1   | axonemal dynein light chain domain containing 1                     | CCDS30948.1     | chr1_179414278-179414278_A_T  | 579E>D  | Substitution | Nonsynonymous coding | 13% |
| MM18T | AXIN2    | axin 2                                                              | CCDS11662.1     | chr17_63533512-63533512_C_T   | 548E>K  | Substitution | Nonsynonymous coding | 15% |
| MM18T | B3GNT3   | UDP-GlcNAc:betaGal beta-1,3-N-acetylglucosaminyltransferase 3       | CCDS12364.1     | chr19_17922546-17922546_T_C   | 245I>T  | Substitution | Nonsynonymous coding | 12% |
| MM18T | B3GNT3   | UDP-GlcNAc:betaGal beta-1,3-N-acetylglucosaminyltransferase 3       | CCDS12364.1     | chr19_17922765-17922765_G_A   | 318R>H  | Substitution | Nonsynonymous coding | 14% |
| MM18T | B3GNTL1  | UDP-GlcNAc:betaGal beta-1,3-N-acetylglucosaminyltransferase-like 1  | CCDS32778.1     | chr17_81006600-81006600_A_G   | 41L>S   | Substitution | Nonsynonymous coding | 14% |
| MM18T | B4GALNT4 | beta-1,4-N-acetyl-galactosaminyl transferase 4                      | CCDS7694.1      | chr11_376474-376474_G_A       | 451E>K  | Substitution | Nonsynonymous coding | 11% |
| MM18T | B4GALT6  | UDP-Gal:betaGlcNAc beta 1,4-galactosyltransferase, polypeptide 6    | CCDS11900.1     | chr18_29211016-29211016_C_T   | 228D>N  | Substitution | Nonsynonymous coding | 15% |
| MM18T | BACE1    | beta-site APP-cleaving enzyme 1                                     | CCDS8383.1      | chr11_117161630-117161630_T_C | 360T>A  | Substitution | Nonsynonymous coding | 23% |
| MM18T | BACH2    | BTB and CNC homology 1, basic leucine zipper transcription factor 2 | CCDS5026.1      | chr6_90647965-90647965_A_C    | 647I>M  | Substitution | Nonsynonymous coding | 11% |
| MM18T | BAG1     | BCL2-associated athanogene                                          | ENST00000379700 | chr9_33255071-33255071_C_A    | 239E>X  | Substitution | Nonsense             | 18% |
| MM18T | BAHD1    | bromo adjacent homology domain containing 1                         | CCDS10058.1     | chr15_40751906-40751906_C_T   | 415L>F  | Substitution | Nonsynonymous coding | 15% |

|       |          |                                                                   |             |                               |         |              |                      |     |
|-------|----------|-------------------------------------------------------------------|-------------|-------------------------------|---------|--------------|----------------------|-----|
| MM18T | BAI1     | brain-specific angiogenesis inhibitor 1                           | NM_001702   | chr8_143545998-143545998_C_T  | 147R>C  | Substitution | Nonsynonymous coding | 19% |
| MM18T | BAI1     | brain-specific angiogenesis inhibitor 1                           | NM_001702   | chr8_143546142-143546142_G_A  | 195A>T  | Substitution | Nonsynonymous coding | 18% |
| MM18T | BAI1     | brain-specific angiogenesis inhibitor 1                           | NM_001702   | chr8_143562960-143562960_C_A  | 673S>Y  | Substitution | Nonsynonymous coding | 11% |
| MM18T | BAI1     | brain-specific angiogenesis inhibitor 1                           | NM_001702   | chr8_143592337-143592337_G_A  | 907R>H  | Substitution | Nonsynonymous coding | 17% |
| MM18T | BAIAP2L2 | BAI1-associated protein 2-like 2                                  | CCDS43018.1 | chr22_38494097-38494097_C_A   | 146K>N  | Substitution | Nonsynonymous coding | 20% |
| MM18T | BAIAP3   | BAI1-associated protein 3                                         | CCDS10434.1 | chr16_1396066-1396066_C_G     | 798A>G  | Substitution | Nonsynonymous coding | 11% |
| MM18T | BAIAP3   | BAI1-associated protein 3                                         | CCDS10434.1 | chr16_1396486-1396486_C_T     | 881S>L  | Substitution | Nonsynonymous coding | 14% |
| MM18T | BAP1     | BRCA1 associated protein-1 (ubiquitin carboxy-terminal hydrolase) | CCDS2853.1  | chr3_52438565-52438565_C_T    | 385R>Q  | Substitution | Nonsynonymous coding | 11% |
| MM18T | BARHL1   | BarH-like homeobox 1                                              | CCDS6950.1  | chr9_135458378-135458378_G_T  | 65R>L   | Substitution | Nonsynonymous coding | 11% |
| MM18T | BARX2    | BARX homeobox 2                                                   | CCDS8481.1  | chr11_129306861-129306861_C_T | 135R>W  | Substitution | Nonsynonymous coding | 15% |
| MM18T | BAZ1A    | bromodomain adjacent to zinc finger domain, 1A                    | CCDS9651.1  | chr14_35231013-35231013_G_T   | 1398S>Y | Substitution | Nonsynonymous coding | 11% |
| MM18T | BAZ1B    | bromodomain adjacent to zinc finger domain, 1B                    | CCDS5549.1  | chr7_72865213-72865213_C_T    | 1182A>T | Substitution | Nonsynonymous coding | 12% |
| MM18T | BAZ1B    | bromodomain adjacent to zinc finger domain, 1B                    | CCDS5549.1  | chr7_72892322-72892322_T_C    | 490D>G  | Substitution | Nonsynonymous coding | 14% |
| MM18T | BAZ2B    | bromodomain adjacent to zinc finger domain, 2B                    | CCDS2209.2  | chr2_160205276-160205276_G_T  | 1736L>I | Substitution | Nonsynonymous coding | 10% |
| MM18T | BAZ2B    | bromodomain adjacent to zinc finger domain, 2B                    | CCDS2209.2  | chr2_160287570-160287570_C_A  | 666E>D  | Substitution | Nonsynonymous coding | 14% |
| MM18T | BAZ2B    | bromodomain adjacent to zinc finger domain, 2B                    | CCDS2209.2  | chr2_160295210-160295210_G_T  | ISV-4>  | Substitution | Splice site acceptor | 13% |
| MM18T | BCAM     | basal cell adhesion molecule (Lutheran blood group)               | CCDS12644.1 | chr19_45315790-45315790_G_T   | 163E>D  | Substitution | Nonsynonymous coding | 17% |
| MM18T | BCAM     | basal cell adhesion molecule (Lutheran blood group)               | CCDS12644.1 | chr19_45322052-45322052_G_A   | 417D>N  | Substitution | Nonsynonymous coding | 13% |
| MM18T | BCAR3    | breast cancer anti-estrogen resistance 3                          | CCDS745.1   | chr1_94054613-94054613_C_T    | 284D>N  | Substitution | Nonsynonymous coding | 19% |
| MM18T | BCAS3    | breast carcinoma amplified sequence 3                             | CCDS45749.1 | chr17_59067401-59067401_G_A   | 431V>I  | Substitution | Nonsynonymous coding | 10% |
| MM18T | BCAS3    | breast carcinoma amplified sequence 3                             | CCDS45749.1 | chr17_59118161-59118161_A_G   | 661Q>R  | Substitution | Nonsynonymous coding | 15% |
| MM18T | BCHE     | butyrylcholinesterase                                             | CCDS3198.1  | chr3_165547696-165547696_T_G  | 376K>Q  | Substitution | Nonsynonymous coding | 15% |
| MM18T | BCHE     | butyrylcholinesterase                                             | CCDS3198.1  | chr3_165547828-165547828_C_A  | 332D>Y  | Substitution | Nonsynonymous coding | 10% |
| MM18T | BCL11A   | B-cell CLL/lymphoma 11A (zinc finger protein)                     | CCDS1861.1  | chr2_60679729-60679729_G_A    | 768S>L  | Substitution | Nonsynonymous coding | 12% |
| MM18T | BCL11B   | B-cell CLL/lymphoma 11B (zinc finger protein)                     | CCDS9950.1  | chr14_99640520-99640520_C_T   | 885D>N  | Substitution | Nonsynonymous coding | 17% |
| MM18T | BCL11B   | B-cell CLL/lymphoma 11B (zinc finger protein)                     | CCDS9950.1  | chr14_99641885-99641885_C_T   | 430E>K  | Substitution | Nonsynonymous coding | 10% |
| MM18T | BCMO1    | beta-carotene 15,15'-monooxygenase 1                              | CCDS10934.1 | chr16_81324156-81324156_G_A   | 540D>N  | Substitution | Nonsynonymous coding | 10% |
| MM18T | BCMO1    | beta-carotene 15,15'-monooxygenase 1                              | CCDS10934.1 | chr16_81319192-81319192_C_T   | 419R>X  | Substitution | Nonsense             | 13% |
| MM18T | BCOR     | BCL6 corepressor                                                  | CCDS48093.1 | chrX_39914741-39914741_C_A    | 1541D>Y | Substitution | Nonsynonymous coding | 14% |
| MM18T | BCOR     | BCL6 corepressor                                                  | CCDS48093.1 | chrX_39916545-39916545_C_A    | 1486K>N | Substitution | Nonsynonymous coding | 14% |
| MM18T | BCOR     | BCL6 corepressor                                                  | CCDS48093.1 | chrX_39932663-39932663_A_C    | 646F>V  | Substitution | Nonsynonymous coding | 18% |
| MM18T | BCORL1   | BCL6 corepressor-like 1                                           | CCDS14616.1 | chrX_129147028-129147028_G_A  | 94D>N   | Substitution | Nonsynonymous coding | 14% |

|       |         |                                                       |                 |                              |         |              |                      |     |
|-------|---------|-------------------------------------------------------|-----------------|------------------------------|---------|--------------|----------------------|-----|
| MM18T | BCORL1  | BCL6 corepressor-like 1                               | CCDS14616.1     | chrX_129147479-129147479_C_T | 244S>L  | Substitution | Nonsynonymous coding | 16% |
| MM18T | BCORL1  | BCL6 corepressor-like 1                               | CCDS14616.1     | chrX_129147629-129147629_C_T | 294P>L  | Substitution | Nonsynonymous coding | 14% |
| MM18T | BCORL1  | BCL6 corepressor-like 1                               | CCDS14616.1     | chrX_129149171-129149171_C_T | 808T>M  | Substitution | Nonsynonymous coding | 18% |
| MM18T | BCORL1  | BCL6 corepressor-like 1                               | CCDS14616.1     | chrX_129149995-129149995_C_T | 1083R>W | Substitution | Nonsynonymous coding | 12% |
| MM18T | BCORL1  | BCL6 corepressor-like 1                               | CCDS14616.1     | chrX_129159284-129159284_G_T | 1336K>N | Substitution | Nonsynonymous coding | 15% |
| MM18T | BCORL1  | BCL6 corepressor-like 1                               | CCDS14616.1     | chrX_129190082-129190082_G_A | 1703E>K | Substitution | Nonsynonymous coding | 11% |
| MM18T | BCR     | breakpoint cluster region                             | CCDS13806.1     | chr22_23613771-23613771_C_A  | 638S>Y  | Substitution | Nonsynonymous coding | 12% |
| MM18T | BCS1L   | BC1 (ubiquinol-cytochrome c reductase) synthesis-like | CCDS2419.1      | chr2_219526239-219526239_G_A | 144R>Q  | Substitution | Nonsynonymous coding | 18% |
| MM18T | BEST3   | bestrophin 3                                          | CCDS8992.2      | chr12_70087681-70087681_T_C  | 85Y>C   | Substitution | Nonsynonymous coding | 10% |
| MM18T | BFSP1   | beaded filament structural protein 1, filensin        | CCDS13126.1     | chr20_17479512-17479512_C_A  | 303K>N  | Substitution | Nonsynonymous coding | 11% |
| MM18T | BFSP1   | beaded filament structural protein 1, filensin        | CCDS13126.1     | chr20_17479597-17479597_C_T  | 275R>H  | Substitution | Nonsynonymous coding | 15% |
| MM18T | BFSP2   | beaded filament structural protein 2, phakinin        | CCDS33859.1     | chr3_133166164-133166164_G_A | 165G>S  | Substitution | Nonsynonymous coding | 14% |
| MM18T | BGN     | biglycan                                              | CCDS14721.1     | chrX_152770773-152770773_C_T | 106R>C  | Substitution | Nonsynonymous coding | 12% |
| MM18T | BHLHB9  | basic helix-loop-helix domain containing, class B, 9  | CCDS14502.1     | chr8_102004767-102004767_C_T | 282R>C  | Substitution | Nonsynonymous coding | 11% |
| MM18T | BHLHE22 | basic helix-loop-helix family, member e22             | CCDS6179.1      | chr8_65494125-65494125_G_A   | 260D>N  | Substitution | Nonsynonymous coding | 20% |
| MM18T | BHLHE41 | basic helix-loop-helix family, member e41             | CCDS8706.1      | chr12_26277054-26277054_T_C  | 62E>G   | Substitution | Nonsynonymous coding | 11% |
| MM18T | BICD1   | bicaudal D homolog 1 (Drosophila)                     | CCDS8726.1      | chr12_32481443-32481443_G_A  | 685R>Q  | Substitution | Nonsynonymous coding | 14% |
| MM18T | BICD2   | bicaudal D homolog 2 (Drosophila)                     | CCDS35064.1     | chr9_95481546-95481546_C_T   | 461E>K  | Substitution | Nonsynonymous coding | 29% |
| MM18T | BIN1    | bridging integrator 1                                 | CCDS2138.1      | chr2_127864483-127864483_T_G | 13K>Q   | Substitution | Nonsynonymous coding | 13% |
| MM18T | BIRC6   | baculoviral IAP repeat containing 6                   | CCDS33175.2     | chr2_32582533-32582533_C_A   | 102L>M  | Substitution | Nonsynonymous coding | 12% |
| MM18T | BLACE   | B-cell acute lymphoblastic leukemia expressed         | ENST00000378120 | chr7_155150415-155150415_A_G | 154S>P  | Substitution | Nonsynonymous coding | 13% |
| MM18T | BLM     | Bloom syndrome, RecQ helicase-like                    | CCDS10363.1     | chr15_91292957-91292957_T_G  | 153D>E  | Substitution | Nonsynonymous coding | 11% |
| MM18T | BLMH    | bleomycin hydrolase                                   | CCDS32604.1     | chr17_28576142-28576142_C_T  | 421E>K  | Substitution | Nonsynonymous coding | 14% |
| MM18T | BLVRA   | biliverdin reductase A                                | CCDS5472.1      | chr7_43827506-43827506_G_A   | 6E>K    | Substitution | Nonsynonymous coding | 17% |
| MM18T | BLZF1   | basic leucine zipper nuclear factor 1                 | CCDS1278.1      | chr1_169356403-169356403_G_T | 396E>X  | Substitution | Nonsense             | 15% |
| MM18T | BMP1    | bone morphogenetic protein 1                          | CCDS6026.1      | chr8_22059429-22059429_G_A   | 741D>N  | Substitution | Nonsynonymous coding | 18% |
| MM18T | BMP10   | bone morphogenetic protein 10                         | CCDS1890.1      | chr2_69093047-69093047_C_T   | 331D>N  | Substitution | Nonsynonymous coding | 14% |
| MM18T | BMP15   | bone morphogenetic protein 15                         | CCDS14334.1     | chrX_50654009-50654009_C_T   | 76R>C   | Substitution | Nonsynonymous coding | 13% |
| MM18T | BMP15   | bone morphogenetic protein 15                         | CCDS14334.1     | chrX_50658940-50658940_C_A   | 171S>Y  | Substitution | Nonsynonymous coding | 11% |
| MM18T | BMP2K   | BMP2 inducible kinase                                 | CCDS47083.1     | chr4_79754829-79754829_G_A   | 131E>K  | Substitution | Nonsynonymous coding | 11% |
| MM18T | BMP2K   | BMP2 inducible kinase                                 | CCDS47083.1     | chr4_79832192-79832192_G_T   | 831D>Y  | Substitution | Nonsynonymous coding | 14% |
| MM18T | BMP3    | bone morphogenetic protein 3                          | CCDS3588.1      | chr4_81967011-81967011_T_C   | 146C>R  | Substitution | Nonsynonymous coding | 11% |

|       |        |                                                        |                 |                               |         |              |                      |     |
|-------|--------|--------------------------------------------------------|-----------------|-------------------------------|---------|--------------|----------------------|-----|
| MM18T | BMP3   | bone morphogenetic protein 3                           | CCDS3588.1      | chr4_81974568-81974568_C_T    | 433P>S  | Substitution | Nonsynonymous coding | 11% |
| MM18T | BMP5   | bone morphogenetic protein 5                           | CCDS4958.1      | chr6_55623865-55623865_C_A    | 385E>X  | Substitution | Nonsense             | 16% |
| MM18T | BMP6   | bone morphogenetic protein 6                           | CCDS4503.1      | chr6_7880279-7880279_C_T      | 446S>F  | Substitution | Nonsynonymous coding | 11% |
| MM18T | BMP7   | bone morphogenetic protein 7                           | CCDS13455.1     | chr20_55841010-55841010_C_T   | 57E>K   | Substitution | Nonsynonymous coding | 17% |
| MM18T | BMPER  | BMP binding endothelial regulator                      | CCDS5442.1      | chr7_33976908-33976908_A_G    | 76E>G   | Substitution | Nonsynonymous coding | 13% |
| MM18T | BMPR1B | bone morphogenetic protein receptor, type IB           | CCDS3642.1      | chr4_96044973-96044973_G_A    | 121G>E  | Substitution | Nonsynonymous coding | 17% |
| MM18T | BNC2   | basonuclin 2                                           | CCDS6482.2      | chr9_16436067-16436067_C_T    | 709D>N  | Substitution | Nonsynonymous coding | 11% |
| MM18T | BNC2   | basonuclin 2                                           | CCDS6482.2      | chr9_16436736-16436736_G_A    | 486R>C  | Substitution | Nonsynonymous coding | 18% |
| MM18T | BOD1L1 | biorientation of chromosomes in cell division 1-like 1 | CCDS3411.2      | chr4_13601673-13601673_G_A    | 2284A>V | Substitution | Nonsynonymous coding | 17% |
| MM18T | BOP1   | block of proliferation 1                               | CCDS6418.1      | chr8_145512798-145512798_T_   | NA      | Deletion     | Frameshift           | 16% |
| MM18T | BPGM   | 2,3-bisphosphoglycerate mutase                         | CCDS5833.1      | chr7_134346662-134346662_G_T  | 135E>X  | Substitution | Nonsense             | 15% |
| MM18T | BPHL   | biphenyl hydrolase-like (serine hydrolase)             | CCDS4483.2      | chr6_3127510-3127510_G_T      | 82K>N   | Substitution | Nonsynonymous coding | 11% |
| MM18T | BPIFA1 | BPI fold containing family A, member 1                 | CCDS13217.1     | chr20_31828179-31828179_C_A   | 190S>Y  | Substitution | Nonsynonymous coding | 13% |
| MM18T | BPIFA3 | BPI fold containing family A, member 3                 | CCDS13216.2     | chr20_31812268-31812268_C_T   | 129P>L  | Substitution | Nonsynonymous coding | 15% |
| MM18T | BPIFB2 | BPI fold containing family B, member 2                 | CCDS13210.1     | chr20_31607497-31607497_G_A   | 341V>M  | Substitution | Nonsynonymous coding | 11% |
| MM18T | BPIFB4 | BPI fold containing family B, member 4                 | CCDS13213.2     | chr20_31671359-31671359_G_A   | 119R>Q  | Substitution | Nonsynonymous coding | 18% |
| MM18T | BPIFB4 | BPI fold containing family B, member 4                 | CCDS13213.2     | chr20_31677359-31677359_T_C   | 349V>A  | Substitution | Nonsynonymous coding | 16% |
| MM18T | BPIFB4 | BPI fold containing family B, member 4                 | CCDS13213.2     | chr20_31680349-31680349_C_A   | 410P>H  | Substitution | Nonsynonymous coding | 20% |
| MM18T | BPIFB4 | BPI fold containing family B, member 4                 | CCDS13213.2     | chr20_31685589-31685589_A_G   | 522D>G  | Substitution | Nonsynonymous coding | 13% |
| MM18T | BPIFC  | BPI fold containing family C                           | CCDS13906.1     | chr22_32811935-32811935_G_T   | 456F>L  | Substitution | Nonsynonymous coding | 22% |
| MM18T | BPTF   | bromodomain PHD finger transcription factor            | CCDS11673.1     | chr17_65850859-65850859_T_G   | 473L>V  | Substitution | Nonsynonymous coding | 21% |
| MM18T | BPTF   | bromodomain PHD finger transcription factor            | CCDS11673.1     | chr17_65942263-65942263_C_T   | 2480A>V | Substitution | Nonsynonymous coding | 13% |
| MM18T | BPTF   | bromodomain PHD finger transcription factor            | CCDS11673.1     | chr17_65971920-65971920_C_T   | 2858R>X | Substitution | Nonsense             | 12% |
| MM18T | BRAF   | v-raf murine sarcoma viral oncogene homolog B1         | CCDS5863.1      | chr7_140434522-140434522_G_A  | 726R>C  | Substitution | Nonsynonymous coding | 13% |
| MM18T | BRAP   | BRCA1 associated protein                               | CCDS9154.1      | chr12_112117032-112117032_C_T | 186E>K  | Substitution | Nonsynonymous coding | 10% |
| MM18T | BRCA2  | breast cancer 2, early onset                           | CCDS9344.1      | chr13_32905125-32905125_A_G   | 251T>A  | Substitution | Nonsynonymous coding | 14% |
| MM18T | BRCC3  | BRCA1/BRCA2-containing complex, subunit 3              | NM_024332       | chrX_154305491-154305491_G_A  | 81R>Q   | Substitution | Nonsynonymous coding | 11% |
| MM18T | BRD1   | bromodomain containing 1                               | CCDS14080.1     | chr22_50169245-50169245_C_A   | 996R>I  | Substitution | Nonsynonymous coding | 13% |
| MM18T | BRD1   | bromodomain containing 1                               | CCDS14080.1     | chr22_50217672-50217672_T_G   | 98K>N   | Substitution | Nonsynonymous coding | 10% |
| MM18T | BRD3   | bromodomain containing 3                               | ENST00000357885 | chr9_136901714-136901714_C_A  | ISV-1>  | Substitution | Splice site acceptor | 11% |
| MM18T | BRD4   | bromodomain containing 4                               | CCDS12328.1     | chr19_15378278-15378278_C_T   | 170E>K  | Substitution | Nonsynonymous coding | 11% |
| MM18T | BRDT   | bromodomain, testis-specific                           | CCDS735.1       | chr1_92445205-92445205_T_C    | 393I>T  | Substitution | Nonsynonymous coding | 13% |

|       |           |                                                                    |                 |                               |         |              |                      |     |
|-------|-----------|--------------------------------------------------------------------|-----------------|-------------------------------|---------|--------------|----------------------|-----|
| MM18T | BRE       | brain and reproductive organ-expressed (TNFRSF1A modulator)        | CCDS1764.1      | chr2_28117449-28117449_G_A    | 9R>Q    | Substitution | Nonsynonymous coding | 11% |
| MM18T | BRIP1     | BRCA1 interacting protein C-terminal helicase 1                    | CCDS11631.1     | chr17_59793411-59793411_C_T   | 798R>Q  | Substitution | Nonsynonymous coding | 12% |
| MM18T | BRIX1     | BRX1, biogenesis of ribosomes, homolog (S. cerevisiae)             | CCDS34143.1     | chr5_34925016-34925016_T_G    | 243I>S  | Substitution | Nonsynonymous coding | 16% |
| MM18T | BRSK1     | BR serine/threonine kinase 1                                       | CCDS12921.1     | chr19_55816099-55816099_C_T   | 510R>C  | Substitution | Nonsynonymous coding | 11% |
| MM18T | BRWD3     | bromodomain and WD repeat domain containing 3                      | CCDS14447.1     | chrX_79978252-79978252_C_T    | 562R>H  | Substitution | Nonsynonymous coding | 11% |
| MM18T | BSN       | bassoon presynaptic cytomatrix protein                             | CCDS2800.1      | chr3_49693024-49693024_C_T    | 2012S>L | Substitution | Nonsynonymous coding | 13% |
| MM18T | BSN       | bassoon presynaptic cytomatrix protein                             | CCDS2800.1      | chr3_49694869-49694869_G_A    | 2627R>H | Substitution | Nonsynonymous coding | 26% |
| MM18T | BSN       | bassoon presynaptic cytomatrix protein                             | CCDS2800.1      | chr3_49697926-49697926_C_T    | 2883A>V | Substitution | Nonsynonymous coding | 10% |
| MM18T | BSND      | Bartter syndrome, infantile, with sensorineural deafness (Barttin) | CCDS602.1       | chr1_55464947-55464947_C_T    | 30R>W   | Substitution | Nonsynonymous coding | 16% |
| MM18T | BTBD17    | BTB (POZ) domain containing 17                                     | CCDS32719.1     | chr17_72353397-72353397_C_T   | 279G>D  | Substitution | Nonsynonymous coding | 22% |
| MM18T | BTBD3     | BTB (POZ) domain containing 3                                      | CCDS13113.1     | chr20_11903641-11903641_G_A   | 299R>Q  | Substitution | Nonsynonymous coding | 13% |
| MM18T | BTD       | biotinidase                                                        | CCDS2628.1      | chr3_15686160-15686160_T_C    | 266V>A  | Substitution | Nonsynonymous coding | 14% |
| MM18T | BTF3      | basic transcription factor 3                                       | CCDS34185.1     | chr5_72794527-72794527_C_A    | 12S>Y   | Substitution | Nonsynonymous coding | 15% |
| MM18T | BTG4      | B-cell translocation gene 4                                        | CCDS8346.1      | chr11_111369417-111369417_C_A | 29D>Y   | Substitution | Nonsynonymous coding | 21% |
| MM18T | BTK       | Bruton agammaglobulinemia tyrosine kinase                          | CCDS14482.1     | chrX_100611842-100611842_C_T  | 427V>M  | Substitution | Nonsynonymous coding | 14% |
| MM18T | BTNL3     | butyrophilin-like 3                                                | CCDS47358.1     | chr5_180424336-180424336_A_G  | 174D>G  | Substitution | Nonsynonymous coding | 14% |
| MM18T | BTNL8     | butyrophilin-like 8                                                | CCDS43413.1     | chr5_180335716-180335716_C_A  | 60F>L   | Substitution | Nonsynonymous coding | 17% |
| MM18T | BTNL9     | butyrophilin-like 9                                                | CCDS4460.2      | chr5_180477348-180477348_G_A  | 239E>K  | Substitution | Nonsynonymous coding | 11% |
| MM18T | BZRAP1    | benzodiazapine receptor (peripheral) associated protein 1          | CCDS11605.1     | chr17_56386344-56386344_C_T   | 1430R>Q | Substitution | Nonsynonymous coding | 21% |
| MM18T | BZW1      | basic leucine zipper and W2 domains 1                              | NM_014670       | chr2_201678000-201678000_A_C  | 20K>N   | Substitution | Nonsynonymous coding | 13% |
| MM18T | C10orf137 | chromosome 10 open reading frame 137                               | CCDS7646.1      | chr10_127436523-127436523_G_A | 988R>Q  | Substitution | Nonsynonymous coding | 15% |
| MM18T | C10orf54  | chromosome 10 open reading frame 54                                | CCDS31218.1     | chr10_73511609-73511609_T_G   | 238Q>H  | Substitution | Nonsynonymous coding | 12% |
| MM18T | C10orf67  | chromosome 10 open reading frame 67                                | CCDS44365.1     | chr10_23611384-23611384_G_T   | 138S>Y  | Substitution | Nonsynonymous coding | 19% |
| MM18T | C10orf76  | chromosome 10 open reading frame 76                                | CCDS41563.1     | chr10_103769157-103769157_G_A | 310R>C  | Substitution | Nonsynonymous coding | 17% |
| MM18T | C10orf90  | chromosome 10 open reading frame 90                                | CCDS31310.1     | chr10_128193630-128193630_T_G | 47K>Q   | Substitution | Nonsynonymous coding | 11% |
| MM18T | C11orf63  | chromosome 11 open reading frame 63                                | CCDS8438.1      | chr11_122828081-122828081_T_G | 674L>X  | Substitution | Nonsense             | 17% |
| MM18T | C11orf87  | chromosome 11 open reading frame 87                                | CCDS31672.1     | chr11_109294681-109294681_G_A | 108G>S  | Substitution | Nonsynonymous coding | 24% |
| MM18T | C11orf87  | chromosome 11 open reading frame 87                                | CCDS31672.1     | chr11_109294802-109294802_C_T | 148S>L  | Substitution | Nonsynonymous coding | 12% |
| MM18T | C12orf44  | chromosome 12 open reading frame 44                                | CCDS8820.1      | chr12_52467514-52467514_C_T   | 27T>M   | Substitution | Nonsynonymous coding | 18% |
| MM18T | C12orf55  | chromosome 12 open reading frame 55                                | ENST00000298953 | chr12_96883544-96883544_G_A   | 53E>K   | Substitution | Nonsynonymous coding | 12% |
| MM18T | C12orf66  | chromosome 12 open reading frame 66                                | CCDS41803.1     | chr12_64609464-64609464_C_A   | 172S>I  | Substitution | Nonsynonymous coding | 13% |
| MM18T | C12orf68  | chromosome 12 open reading frame 68                                | CCDS31785.1     | chr12_48578305-48578305_G_A   | 134D>N  | Substitution | Nonsynonymous coding | 23% |

|       |           |                                      |                 |                              |        |              |                      |     |
|-------|-----------|--------------------------------------|-----------------|------------------------------|--------|--------------|----------------------|-----|
| MM18T | C14orf159 | chromosome 14 open reading frame 159 | ENST00000298858 | chr14_91633932-91633932_G_T  | 126R>I | Substitution | Nonsynonymous coding | 16% |
| MM18T | C14orf37  | chromosome 14 open reading frame 37  | CCDS32089.1     | chr14_58471800-58471800_C_T  | 741R>Q | Substitution | Nonsynonymous coding | 15% |
| MM18T | C14orf37  | chromosome 14 open reading frame 37  | CCDS32089.1     | chr14_58604792-58604792_C_T  | 429D>N | Substitution | Nonsynonymous coding | 11% |
| MM18T | C15orf26  | chromosome 15 open reading frame 26  | CCDS42068.1     | chr15_81430472-81430472_A_T  | 158K>I | Substitution | Nonsynonymous coding | 14% |
| MM18T | C15orf39  | chromosome 15 open reading frame 39  | CCDS10276.1     | chr15_75498695-75498695_G_T  | 102E>D | Substitution | Nonsynonymous coding | 12% |
| MM18T | C15orf55  | chromosome 15 open reading frame 55  | CCDS32190.1     | chr15_34640325-34640325_G_A  | 58D>N  | Substitution | Nonsynonymous coding | 11% |
| MM18T | C15orf59  | chromosome 15 open reading frame 59  | CCDS32289.1     | chr15_74032947-74032947_C_T  | 65D>N  | Substitution | Nonsynonymous coding | 17% |
| MM18T | C16orf71  | chromosome 16 open reading frame 71  | CCDS10521.1     | chr16_4790455-4790455_C_A    | 193S>Y | Substitution | Nonsynonymous coding | 17% |
| MM18T | C16orf91  | chromosome 16 open reading frame 91  | CCDS32360.1     | chr16_1479248-1479248_G_T    | 33A>D  | Substitution | Nonsynonymous coding | 14% |
| MM18T | C17orf104 | chromosome 17 open reading frame 104 | ENST00000409122 | chr17_42750761-42750761_C_T  | 829R>C | Substitution | Nonsynonymous coding | 11% |
| MM18T | C17orf104 | chromosome 17 open reading frame 104 | ENST00000409122 | chr17_42750767-42750767_C_T  | 831R>W | Substitution | Nonsynonymous coding | 11% |
| MM18T | C17orf112 | chromosome 17 open reading frame 112 | ENST00000441889 | chr17_51063822-51063822_G_A  | 22M>I  | Substitution | Nonsynonymous coding | 13% |
| MM18T | C17orf112 | chromosome 17 open reading frame 112 | ENST00000441889 | chr17_51064041-51064041_G_A  | 59G>D  | Substitution | Nonsynonymous coding | 15% |
| MM18T | C17orf112 | chromosome 17 open reading frame 112 | ENST00000441889 | chr17_51064127-51064127_G_A  | 88G>R  | Substitution | Nonsynonymous coding | 17% |
| MM18T | C17orf47  | chromosome 17 open reading frame 47  | CCDS32691.1     | chr17_56621153-56621153_C_T  | 132R>Q | Substitution | Nonsynonymous coding | 16% |
| MM18T | C17orf47  | chromosome 17 open reading frame 47  | CCDS32691.1     | chr17_56621281-56621281_C_A  | 89E>D  | Substitution | Nonsynonymous coding | 11% |
| MM18T | C17orf66  | chromosome 17 open reading frame 66  | CCDS11299.1     | chr17_34190039-34190039_C_T  | 239R>Q | Substitution | Nonsynonymous coding | 10% |
| MM18T | C17orf75  | chromosome 17 open reading frame 75  | NM_022344       | chr17_30660476-30660476_G_T  | 312P>H | Substitution | Nonsynonymous coding | 12% |
| MM18T | C17orf78  | chromosome 17 open reading frame 78  | CCDS45655.1     | chr17_35743045-35743045_G_A  | 164E>K | Substitution | Nonsynonymous coding | 14% |
| MM18T | C18orf54  | chromosome 18 open reading frame 54  | ENST00000382911 | chr18_51888648-51888648_G_T  | 307D>Y | Substitution | Nonsynonymous coding | 16% |
| MM18T | C19orf44  | chromosome 19 open reading frame 44  | CCDS12345.1     | chr19_16611923-16611923_G_A  | 107R>Q | Substitution | Nonsynonymous coding | 18% |
| MM18T | C19orf44  | chromosome 19 open reading frame 44  | CCDS12345.1     | chr19_16620764-16620764_C_T  | 535T>M | Substitution | Nonsynonymous coding | 19% |
| MM18T | C19orf68  | chromosome 19 open reading frame 68  | ENST00000328759 | chr19_48699128-48699128_C_T  | 603R>C | Substitution | Nonsynonymous coding | 15% |
| MM18T | C1orf109  | chromosome 1 open reading frame 109  | CCDS423.1       | chr1_38151951-38151951_C_T   | 150R>Q | Substitution | Nonsynonymous coding | 11% |
| MM18T | C1orf116  | chromosome 1 open reading frame 116  | CCDS1475.1      | chr1_207198298-207198298_C_T | 73E>K  | Substitution | Nonsynonymous coding | 14% |
| MM18T | C1orf158  | chromosome 1 open reading frame 158  | CCDS147.1       | chr1_12819315-12819315_G_A   | 100D>N | Substitution | Nonsynonymous coding | 14% |
| MM18T | C1orf195  | chromosome 1 open reading frame 195  | ENST00000376005 | chr1_15495101-15495101_G_A   | 91R>C  | Substitution | Nonsynonymous coding | 14% |
| MM18T | C1orf204  | chromosome 1 open reading frame 204  | CCDS30913.1     | chr1_159825862-159825862_C_T | 261R>H | Substitution | Nonsynonymous coding | 15% |
| MM18T | C1orf21   | chromosome 1 open reading frame 21   | CCDS1362.1      | chr1_184446669-184446669_T_C | 9V>A   | Substitution | Nonsynonymous coding | 12% |
| MM18T | C1orf210  | chromosome 1 open reading frame 210  | NM_001164829    | chr1_43748652-43748652_G_C   | 49A>G  | Substitution | Nonsynonymous coding | 13% |
| MM18T | C1orf226  | chromosome 1 open reading frame 226  | CCDS44268.1     | chr1_162353030-162353030_C_T | 169R>X | Substitution | Nonsense             | 10% |
| MM18T | C1orf51   | chromosome 1 open reading frame 51   | CCDS949.1       | chr1_150255782-150255782_G_T | 35E>D  | Substitution | Nonsynonymous coding | 15% |

|       |          |                                                 |             |                               |         |              |                      |     |
|-------|----------|-------------------------------------------------|-------------|-------------------------------|---------|--------------|----------------------|-----|
| MM18T | C1orf51  | chromosome 1 open reading frame 51              | CCDS949.1   | chr1_150258855-150258855_A_G  | 216H>R  | Substitution | Nonsynonymous coding | 13% |
| MM18T | C1orf51  | chromosome 1 open reading frame 51              | CCDS949.1   | chr1_150259082-150259082_G_A  | 292V>I  | Substitution | Nonsynonymous coding | 12% |
| MM18T | C1orf65  | chromosome 1 open reading frame 65              | CCDS1537.1  | chr1_223567386-223567386_C_T  | 190S>L  | Substitution | Nonsynonymous coding | 21% |
| MM18T | C1orf65  | chromosome 1 open reading frame 65              | CCDS1537.1  | chr1_223567705-223567705_G_T  | 296M>I  | Substitution | Nonsynonymous coding | 13% |
| MM18T | C1orf87  | chromosome 1 open reading frame 87              | CCDS614.1   | chr1_60466771-60466771_G_T    | 417S>Y  | Substitution | Nonsynonymous coding | 11% |
| MM18T | C1orf94  | chromosome 1 open reading frame 94              | CCDS44108.1 | chr1_34663095-34663095_G_T    | 197R>M  | Substitution | Nonsynonymous coding | 11% |
| MM18T | C1QB     | complement component 1, q subcomponent, B chain | CCDS228.1   | chr1_22987331-22987331_G_T    | 72G>C   | Substitution | Nonsynonymous coding | 29% |
| MM18T | C1QL2    | complement component 1, q subcomponent-like 2   | CCDS42737.1 | chr2_119915824-119915824_C_T  | 8A>T    | Substitution | Nonsynonymous coding | 14% |
| MM18T | C1QTNF4  | C1q and tumor necrosis factor related protein 4 | CCDS7942.1  | chr11_47611809-47611809_C_T   | 185R>H  | Substitution | Nonsynonymous coding | 23% |
| MM18T | C1QTNF8  | C1q and tumor necrosis factor related protein 8 | CCDS32358.1 | chr16_1143649-1143649_G_A     | 204A>V  | Substitution | Nonsynonymous coding | 31% |
| MM18T | C1S      | complement component 1, s subcomponent          | CCDS31735.1 | chr12_7177479-7177479_G_A     | 531A>T  | Substitution | Nonsynonymous coding | 16% |
| MM18T | C2       | complement component 2                          | CCDS4728.1  | chr6_31912561-31912561_G_T    | 654D>Y  | Substitution | Nonsynonymous coding | 12% |
| MM18T | C2orf111 | chromosome 20 open reading frame 111            | CCDS13327.1 | chr20_42826332-42826332_C_T   | 80R>Q   | Substitution | Nonsynonymous coding | 11% |
| MM18T | C2orf112 | chromosome 20 open reading frame 112            | CCDS13202.1 | chr20_31044120-31044120_T_C   | 63D>G   | Substitution | Nonsynonymous coding | 19% |
| MM18T | C2orf195 | chromosome 20 open reading frame 195            | CCDS13526.1 | chr20_62187386-62187386_C_A   | 124L>M  | Substitution | Nonsynonymous coding | 15% |
| MM18T | C2orf24  | chromosome 20 open reading frame 24             | CCDS13279.1 | chr20_35240525-35240525_C_A   | 111R>S  | Substitution | Nonsynonymous coding | 15% |
| MM18T | C2orf85  | chromosome 20 open reading frame 85             | CCDS13465.1 | chr20_56735790-56735790_A_G   | 109N>S  | Substitution | Nonsynonymous coding | 20% |
| MM18T | C2CD2    | C2 calcium-dependent domain containing 2        | CCDS42933.1 | chr21_43332477-43332477_T_C   | 306N>S  | Substitution | Nonsynonymous coding | 13% |
| MM18T | C2CD2L   | C2CD2-like                                      | CCDS8413.1  | chr11_118986895-118986895_C_T | 685R>C  | Substitution | Nonsynonymous coding | 15% |
| MM18T | C2CD4C   | C2 calcium-dependent domain containing 4C       | CCDS45890.1 | chr19_407707-407707_C_A       | 219G>W  | Substitution | Nonsynonymous coding | 12% |
| MM18T | C2CD5    | C2 calcium-dependent domain containing 5        | CCDS31758.1 | chr12_22677418-22677418_A_G   | 197S>P  | Substitution | Nonsynonymous coding | 14% |
| MM18T | C2orf16  | chromosome 2 open reading frame 16              | CCDS42666.1 | chr2_27802619-27802619_T_G    | 1060I>M | Substitution | Nonsynonymous coding | 13% |
| MM18T | C2orf42  | chromosome 2 open reading frame 42              | CCDS1899.1  | chr2_70396725-70396725_C_A    | 370E>X  | Substitution | Nonsense             | 14% |
| MM18T | C2orf53  | chromosome 2 open reading frame 53              | CCDS1739.1  | chr2_27360479-27360479_C_A    | 240R>I  | Substitution | Nonsynonymous coding | 18% |
| MM18T | C2orf71  | chromosome 2 open reading frame 71              | CCDS42669.1 | chr2_29294777-29294777_G_T    | 784S>Y  | Substitution | Nonsynonymous coding | 13% |
| MM18T | C2orf78  | chromosome 2 open reading frame 78              | CCDS46338.1 | chr2_74042396-74042396_C_A    | 349S>Y  | Substitution | Nonsynonymous coding | 11% |
| MM18T | C3       | complement component 3                          | CCDS32883.1 | chr19_6712568-6712568_A_G     | 357F>S  | Substitution | Nonsynonymous coding | 10% |
| MM18T | C3orf17  | chromosome 3 open reading frame 17              | CCDS33824.1 | chr3_112724592-112724592_G_T  | 499L>I  | Substitution | Nonsynonymous coding | 11% |
| MM18T | C3orf20  | chromosome 3 open reading frame 20              | CCDS33706.1 | chr3_14745893-14745893_A_C    | 310I>L  | Substitution | Nonsynonymous coding | 11% |
| MM18T | C3orf20  | chromosome 3 open reading frame 20              | CCDS33706.1 | chr3_14799032-14799032_C_T    | 699R>C  | Substitution | Nonsynonymous coding | 11% |
| MM18T | C3orf36  | chromosome 3 open reading frame 36              | CCDS3083.1  | chr3_133647636-133647636_C_A  | 4E>D    | Substitution | Nonsynonymous coding | 24% |
| MM18T | C3orf55  | chromosome 3 open reading frame 55              | CCDS46943.1 | chr3_157288998-157288998_T_C  | 39V>A   | Substitution | Nonsynonymous coding | 11% |

|       |          |                                     |                 |                              |        |              |                      |     |
|-------|----------|-------------------------------------|-----------------|------------------------------|--------|--------------|----------------------|-----|
| MM18T | C3orf62  | chromosome 3 open reading frame 62  | CCDS2792.1      | chr3_49314059-49314059_G_A   | 83P>S  | Substitution | Nonsynonymous coding | 14% |
| MM18T | C4orf29  | chromosome 4 open reading frame 29  | CCDS47131.1     | chr4_128949888-128949888_C_T | 320R>C | Substitution | Nonsynonymous coding | 13% |
| MM18T | C4orf6   | chromosome 4 open reading frame 6   | CCDS3381.1      | chr4_5527166-5527166_T_G     | 37F>V  | Substitution | Nonsynonymous coding | 15% |
| MM18T | C5       | complement component 5              | CCDS6826.1      | chr9_123770705-123770705_C_T | 777V>I | Substitution | Nonsynonymous coding | 18% |
| MM18T | C5orf22  | chromosome 5 open reading frame 22  | CCDS3895.1      | chr5_31545757-31545757_G_A   | 333E>K | Substitution | Nonsynonymous coding | 10% |
| MM18T | C5orf34  | chromosome 5 open reading frame 34  | NM_198566       | chr5_43494633-43494633_G_T   | 408S>Y | Substitution | Nonsynonymous coding | 13% |
| MM18T | C5orf38  | chromosome 5 open reading frame 38  | CCDS34131.1     | chr5_2752496-2752496_C_T     | 40R>C  | Substitution | Nonsynonymous coding | 23% |
| MM18T | C5orf42  | chromosome 5 open reading frame 42  | NM_023073       | chr5_37227151-37227151_C_T   | 516E>K | Substitution | Nonsynonymous coding | 13% |
| MM18T | C5orf45  | chromosome 5 open reading frame 45  | CCDS34319.1     | chr5_179264737-179264737_C_A | 229W>L | Substitution | Nonsynonymous coding | 17% |
| MM18T | C5orf49  | chromosome 5 open reading frame 49  | CCDS43300.1     | chr5_7832093-7832093_C_T     | 105R>H | Substitution | Nonsynonymous coding | 14% |
| MM18T | C5orf49  | chromosome 5 open reading frame 49  | CCDS43300.1     | chr5_7835572-7835572_G_A     | 63R>C  | Substitution | Nonsynonymous coding | 11% |
| MM18T | C6       | complement component 6              | CCDS3936.1      | chr5_41153948-41153948_T_C   | 752T>A | Substitution | Nonsynonymous coding | 21% |
| MM18T | C6orf106 | chromosome 6 open reading frame 106 | CCDS4796.1      | chr6_34574555-34574555_A_C   | 213F>C | Substitution | Nonsynonymous coding | 17% |
| MM18T | C6orf15  | chromosome 6 open reading frame 15  | CCDS4693.1      | chr6_31080048-31080048_C_T   | 30G>S  | Substitution | Nonsynonymous coding | 11% |
| MM18T | C6orf165 | chromosome 6 open reading frame 165 | CCDS34498.1     | chr6_88138455-88138455_G_A   | 358E>K | Substitution | Nonsynonymous coding | 15% |
| MM18T | C6orf170 | chromosome 6 open reading frame 170 | CCDS43501.1     | chr6_121625731-121625731_A_T | 270H>Q | Substitution | Nonsynonymous coding | 17% |
| MM18T | C6orf195 | chromosome 6 open reading frame 195 | CCDS43416.1     | chr6_2624004-2624004_C_G     | 18C>S  | Substitution | Nonsynonymous coding | 11% |
| MM18T | C6orf222 | chromosome 6 open reading frame 222 | NM_001010903    | chr6_36298129-36298129_C_A   | 113E>D | Substitution | Nonsynonymous coding | 14% |
| MM18T | C6orf223 | chromosome 6 open reading frame 223 | NM_153246       | chr6_43969824-43969824_G_T   | 81E>D  | Substitution | Nonsynonymous coding | 16% |
| MM18T | C6orf52  | chromosome 6 open reading frame 52  | CCDS47371.1     | chr6_10687728-10687728_T_C   | 19Y>C  | Substitution | Nonsynonymous coding | 12% |
| MM18T | C6orf62  | chromosome 6 open reading frame 62  | CCDS4559.1      | chr6_24706385-24706385_G_A   | 224R>C | Substitution | Nonsynonymous coding | 16% |
| MM18T | C6orf62  | chromosome 6 open reading frame 62  | CCDS4559.1      | chr6_24709039-24709039_G_T   | 177S>X | Substitution | Nonsense             | 12% |
| MM18T | C7       | complement component 7              | CCDS47201.1     | chr5_40936512-40936512_G_T   | 118R>I | Substitution | Nonsynonymous coding | 20% |
| MM18T | C7orf53  | chromosome 7 open reading frame 53  | CCDS5756.1      | chr7_112126985-112126985_G_T | 45E>D  | Substitution | Nonsynonymous coding | 14% |
| MM18T | C8orf22  | chromosome 8 open reading frame 22  | CCDS47854.1     | chr8_49985442-49985442_G_A   | 18R>Q  | Substitution | Nonsynonymous coding | 13% |
| MM18T | C9orf131 | chromosome 9 open reading frame 131 | CCDS6572.2      | chr9_35042438-35042438_C_T   | 63R>X  | Substitution | Nonsense             | 12% |
| MM18T | C9orf141 | chromosome 9 open reading frame 141 | ENST00000371629 | chr9_139866223-139866223_C_T | 212P>S | Substitution | Nonsynonymous coding | 23% |
| MM18T | C9orf156 | chromosome 9 open reading frame 156 | ENST00000455506 | chr9_100675638-100675638_T_G | 150K>Q | Substitution | Nonsynonymous coding | 14% |
| MM18T | C9orf47  | chromosome 9 open reading frame 47  | CCDS35062.1     | chr9_91605986-91605986_T_C   | 26S>P  | Substitution | Nonsynonymous coding | 15% |
| MM18T | C9orf84  | chromosome 9 open reading frame 84  | CCDS6781.3      | chr9_114490244-114490244_C_A | 437K>N | Substitution | Nonsynonymous coding | 14% |
| MM18T | C9orf9   | chromosome 9 open reading frame 9   | CCDS6955.1      | chr9_135763777-135763777_G_T | 150E>X | Substitution | Nonsense             | 20% |
| MM18T | CA12     | carbonic anhydrase XII              | CCDS10185.1     | chr15_63638869-63638869_G_A  | 49S>L  | Substitution | Nonsynonymous coding | 13% |



|       |         |                                                                |             |                               |         |              |                      |     |
|-------|---------|----------------------------------------------------------------|-------------|-------------------------------|---------|--------------|----------------------|-----|
| MM18T | CA8     | carbonic anhydrase VIII                                        | CCDS6174.1  | chr8_61192307-61192307_C_T    | 78R>Q   | Substitution | Nonsynonymous coding | 14% |
| MM18T | CAB39   | calcium binding protein 39                                     | CCDS2478.1  | chr2_231655611-231655611_C_A  | 47L>M   | Substitution | Nonsynonymous coding | 10% |
| MM18T | CAB39L  | calcium binding protein 39-like                                | CCDS9416.2  | chr13_49885084-49885084_G_T   | 294L>M  | Substitution | Nonsynonymous coding | 13% |
| MM18T | CAB39L  | calcium binding protein 39-like                                | CCDS9416.2  | chr13_49924940-49924940_G_T   | 168F>L  | Substitution | Nonsynonymous coding | 13% |
| MM18T | CABIN1  | calcineurin binding protein 1                                  | CCDS13823.1 | chr22_24494117-24494117_T_C   | 1360V>A | Substitution | Nonsynonymous coding | 19% |
| MM18T | CABP1   | calcium binding protein 1                                      | CCDS9205.1  | chr12_121088471-121088471_A_C | 11N>H   | Substitution | Nonsynonymous coding | 14% |
| MM18T | CACFD1  | calcium channel flower domain containing 1                     | CCDS6974.1  | chr9_136333689-136333689_G_A  | 145D>N  | Substitution | Nonsynonymous coding | 10% |
| MM18T | CACHD1  | cache domain containing 1                                      | CCDS628.2   | chr1_65147765-65147765_C_T    | 1137R>X | Substitution | Nonsense             | 12% |
| MM18T | CACNA1A | calcium channel, voltage-dependent, P/Q type, alpha 1A subunit | CCDS45998.1 | chr19_13397637-13397637_G_A   | 1078S>L | Substitution | Nonsynonymous coding | 16% |
| MM18T | CACNA1B | calcium channel, voltage-dependent, N type, alpha 1B subunit   | NM_000718   | chr9_140946594-140946594_G_A  | 1254R>H | Substitution | Nonsynonymous coding | 22% |
| MM18T | CACNA1B | calcium channel, voltage-dependent, N type, alpha 1B subunit   | NM_000718   | chr9_141016320-141016320_G_A  | 2297V>M | Substitution | Nonsynonymous coding | 29% |
| MM18T | CACNA1B | calcium channel, voltage-dependent, N type, alpha 1B subunit   | NM_000718   | chr9_140953020-140953020_G_T  | ISV-1>  | Substitution | Splice site acceptor | 19% |
| MM18T | CACNA1C | calcium channel, voltage-dependent, L type, alpha 1C subunit   | CCDS44788.1 | chr12_2224450-2224450_G_A     | 37G>E   | Substitution | Nonsynonymous coding | 19% |
| MM18T | CACNA1C | calcium channel, voltage-dependent, L type, alpha 1C subunit   | CCDS44788.1 | chr12_2760824-2760824_C_T     | 1370R>C | Substitution | Nonsynonymous coding | 11% |
| MM18T | CACNA1D | calcium channel, voltage-dependent, L type, alpha 1D subunit   | CCDS2872.1  | chr3_53736835-53736835_A_C    | 463N>T  | Substitution | Nonsynonymous coding | 16% |
| MM18T | CACNA1D | calcium channel, voltage-dependent, L type, alpha 1D subunit   | CCDS2872.1  | chr3_53752345-53752345_G_A    | 470E>K  | Substitution | Nonsynonymous coding | 13% |
| MM18T | CACNA1D | calcium channel, voltage-dependent, L type, alpha 1D subunit   | CCDS2872.1  | chr3_53769438-53769438_A_G    | 907I>V  | Substitution | Nonsynonymous coding | 13% |
| MM18T | CACNA1D | calcium channel, voltage-dependent, L type, alpha 1D subunit   | CCDS2872.1  | chr3_53835229-53835229_T_C    | 1749F>L | Substitution | Nonsynonymous coding | 10% |
| MM18T | CACNA1E | calcium channel, voltage-dependent, R type, alpha 1E subunit   | NM_000721   | chr1_181702851-181702851_A_G  | 1076D>G | Substitution | Nonsynonymous coding | 18% |
| MM18T | CACNA1E | calcium channel, voltage-dependent, R type, alpha 1E subunit   | NM_000721   | chr1_181725111-181725111_G_A  | 1337E>K | Substitution | Nonsynonymous coding | 15% |
| MM18T | CACNA1E | calcium channel, voltage-dependent, R type, alpha 1E subunit   | NM_000721   | chr1_181725168-181725168_G_A  | 1356D>N | Substitution | Nonsynonymous coding | 10% |
| MM18T | CACNA1E | calcium channel, voltage-dependent, R type, alpha 1E subunit   | NM_000721   | chr1_181453100-181453100_G_T  | 74E>X   | Substitution | Nonsense             | 12% |
| MM18T | CACNA1F | calcium channel, voltage-dependent, L type, alpha 1F subunit   | CCDS35253.1 | chrX_49066121-49066121_C_T    | 1608D>N | Substitution | Nonsynonymous coding | 17% |
| MM18T | CACNA1F | calcium channel, voltage-dependent, L type, alpha 1F subunit   | CCDS35253.1 | chrX_49067473-49067473_T_C    | 1458H>R | Substitution | Nonsynonymous coding | 15% |
| MM18T | CACNA1F | calcium channel, voltage-dependent, L type, alpha 1F subunit   | CCDS35253.1 | chrX_49087364-49087364_C_T    | 157A>T  | Substitution | Nonsynonymous coding | 13% |
| MM18T | CACNA1F | calcium channel, voltage-dependent, L type, alpha 1F subunit   | CCDS35253.1 | chrX_49079176-49079176_C_T    | ISV+1>  | Substitution | Splice site donor    | 16% |
| MM18T | CACNA1G | calcium channel, voltage-dependent, T type, alpha 1G subunit   | CCDS45730.1 | chr17_48653674-48653674_G_T   | 637E>D  | Substitution | Nonsynonymous coding | 18% |
| MM18T | CACNA1G | calcium channel, voltage-dependent, T type, alpha 1G subunit   | CCDS45730.1 | chr17_48685338-48685338_C_T   | 1555R>W | Substitution | Nonsynonymous coding | 13% |
| MM18T | CACNA1H | calcium channel, voltage-dependent, T type, alpha 1H subunit   | CCDS45375.1 | chr16_1260406-1260406_G_T     | 1294K>N | Substitution | Nonsynonymous coding | 17% |
| MM18T | CACNA1H | calcium channel, voltage-dependent, T type, alpha 1H subunit   | CCDS45375.1 | chr16_1262132-1262132_C_T     | 1585R>C | Substitution | Nonsynonymous coding | 39% |
| MM18T | CACNA1H | calcium channel, voltage-dependent, T type, alpha 1H subunit   | CCDS45375.1 | chr16_1267930-1267930_G_T     | 1779D>Y | Substitution | Nonsynonymous coding | 14% |
| MM18T | CACNA1I | calcium channel, voltage-dependent, T type, alpha 1I subunit   | CCDS46710.1 | chr22_40015374-40015374_G_A   | 181R>H  | Substitution | Nonsynonymous coding | 15% |

|       |          |                                                                                  |             |                               |         |              |                      |     |
|-------|----------|----------------------------------------------------------------------------------|-------------|-------------------------------|---------|--------------|----------------------|-----|
| MM18T | CACNA1I  | calcium channel, voltage-dependent, T type, alpha 1I subunit                     | CCDS46710.1 | chr22_40045694-40045694_G_A   | 586E>K  | Substitution | Nonsynonymous coding | 11% |
| MM18T | CACNA1S  | calcium channel, voltage-dependent, L type, alpha 1S subunit                     | CCDS1407.1  | chr1_201046155-201046155_C_T  | 574A>T  | Substitution | Nonsynonymous coding | 13% |
| MM18T | CACNA1S  | calcium channel, voltage-dependent, L type, alpha 1S subunit                     | CCDS1407.1  | chr1_201047128-201047128_C_T  | 500D>N  | Substitution | Nonsynonymous coding | 17% |
| MM18T | CACNA2D1 | calcium channel, voltage-dependent, alpha 2/delta subunit 1                      | CCDS5598.1  | chr7_81593412-81593412_C_A    | 914D>Y  | Substitution | Nonsynonymous coding | 11% |
| MM18T | CACNA2D1 | calcium channel, voltage-dependent, alpha 2/delta subunit 1                      | CCDS5598.1  | chr7_81611940-81611940_G_A    | 633S>L  | Substitution | Nonsynonymous coding | 17% |
| MM18T | CACNA2D3 | calcium channel, voltage-dependent, alpha 2/delta subunit 3                      | NM_018398   | chr3_54905569-54905569_G_A    | 544E>K  | Substitution | Nonsynonymous coding | 12% |
| MM18T | CACNA2D3 | calcium channel, voltage-dependent, alpha 2/delta subunit 3                      | NM_018398   | chr3_54913112-54913112_A_C    | 593K>T  | Substitution | Nonsynonymous coding | 13% |
| MM18T | CACNA2D3 | calcium channel, voltage-dependent, alpha 2/delta subunit 3                      | NM_018398   | chr3_54615902-54615902_G_T    | 321E>X  | Substitution | Nonsense             | 10% |
| MM18T | CACNA2D3 | calcium channel, voltage-dependent, alpha 2/delta subunit 3                      | NM_018398   | chr3_55107575-55107575_G_T    | 1031E>X | Substitution | Nonsense             | 13% |
| MM18T | CACNB1   | calcium channel, voltage-dependent, beta 1 subunit                               | CCDS42311.1 | chr17_37333740-37333740_C_T   | 399E>K  | Substitution | Nonsynonymous coding | 17% |
| MM18T | CACNB2   | calcium channel, voltage-dependent, beta 2 subunit                               | CCDS7125.1  | chr10_18816590-18816590_G_A   | 340A>T  | Substitution | Nonsynonymous coding | 17% |
| MM18T | CACNB2   | calcium channel, voltage-dependent, beta 2 subunit                               | CCDS7125.1  | chr10_18827118-18827118_G_A   | 438D>N  | Substitution | Nonsynonymous coding | 11% |
| MM18T | CACNG1   | calcium channel, voltage-dependent, gamma subunit 1                              | CCDS11668.1 | chr17_65040864-65040864_G_A   | 30D>N   | Substitution | Nonsynonymous coding | 11% |
| MM18T | CACNG5   | calcium channel, voltage-dependent, gamma subunit 5                              | CCDS11665.1 | chr17_64881325-64881325_G_A   | 266D>N  | Substitution | Nonsynonymous coding | 15% |
| MM18T | CACNG6   | calcium channel, voltage-dependent, gamma subunit 6                              | CCDS12870.1 | chr19_54496360-54496360_G_A   | 77E>K   | Substitution | Nonsynonymous coding | 16% |
| MM18T | CACNG7   | calcium channel, voltage-dependent, gamma subunit 7                              | CCDS12868.1 | chr19_54416137-54416137_G_A   | 18A>T   | Substitution | Nonsynonymous coding | 13% |
| MM18T | CAD      | carbamoyl-phosphate synthetase 2, aspartate transcarbamylase, and dihydroorotase | CCDS1742.1  | chr2_27459690-27459690_G_A    | 1463R>Q | Substitution | Nonsynonymous coding | 18% |
| MM18T | CADM1    | cell adhesion molecule 1                                                         | CCDS8373.1  | chr11_115047212-115047212_C_A | 437K>N  | Substitution | Nonsynonymous coding | 13% |
| MM18T | CADPS    | Ca <sup>++</sup> -dependent secretion activator                                  | CCDS46858.1 | chr3_62385095-62385095_C_T    | 1350E>K | Substitution | Nonsynonymous coding | 15% |
| MM18T | CADPS    | Ca <sup>++</sup> -dependent secretion activator                                  | CCDS46858.1 | chr3_62739163-62739163_G_T    | 281L>I  | Substitution | Nonsynonymous coding | 14% |
| MM18T | CADPS    | Ca <sup>++</sup> -dependent secretion activator                                  | CCDS46858.1 | chr3_62860673-62860673_G_A    | 11S>L   | Substitution | Nonsynonymous coding | 20% |
| MM18T | CADPS2   | Ca <sup>++</sup> -dependent secretion activator 2                                | CCDS47691.1 | chr7_122153316-122153316_A_C  | 510F>C  | Substitution | Nonsynonymous coding | 14% |
| MM18T | CALCOCO1 | calcium binding and coiled-coil domain 1                                         | CCDS8864.1  | chr12_54115868-54115868_G_A   | 184L>F  | Substitution | Nonsynonymous coding | 10% |
| MM18T | CALD1    | caldesmon 1                                                                      | CCDS5835.1  | chr7_134618703-134618703_A    | NA      | Insertion    | Frameshift           | 13% |
| MM18T | CALHM2   | calcium homeostasis modulator 2                                                  | CCDS7549.1  | chr10_105209683-105209683_C_T | 6A>T    | Substitution | Nonsynonymous coding | 18% |
| MM18T | CAMK1    | calcium/calmodulin-dependent protein kinase I                                    | CCDS2582.1  | chr3_9801429-9801429_C_A      | 251D>Y  | Substitution | Nonsynonymous coding | 13% |
| MM18T | CAMK1D   | calcium/calmodulin-dependent protein kinase ID                                   | CCDS7091.1  | chr10_12867657-12867657_C_T   | 336S>L  | Substitution | Nonsynonymous coding | 15% |
| MM18T | CAMKK2   | calcium/calmodulin-dependent protein kinase 2, beta                              | CCDS9216.1  | chr12_121693602-121693602_C_T | 268E>K  | Substitution | Nonsynonymous coding | 16% |
| MM18T | CAMKV    | CaM kinase-like vesicle-associated                                               | CCDS33762.1 | chr3_49898882-49898882_C_A    | 144R>M  | Substitution | Nonsynonymous coding | 16% |
| MM18T | CAMSAP1  | calmodulin regulated spectrin-associated protein 1                               | CCDS35176.2 | chr9_138712774-138712774_C_T  | 1245D>N | Substitution | Nonsynonymous coding | 23% |
| MM18T | CAMSAP2  | calmodulin regulated spectrin-associated protein family, member 2                | CCDS1404.1  | chr1_200818427-200818427_C_T  | 844P>S  | Substitution | Nonsynonymous coding | 10% |
| MM18T | CAMTA1   | calmodulin binding transcription activator 1                                     | CCDS30576.1 | chr1_7798336-7798336_C_A      | 1326L>I | Substitution | Nonsynonymous coding | 18% |

|       |          |                                                                   |              |                              |         |              |                      |     |
|-------|----------|-------------------------------------------------------------------|--------------|------------------------------|---------|--------------|----------------------|-----|
| MM18T | CAND1    | cullin-associated and neddylation-dissociated 1                   | CCDS8977.1   | chr12_67696276-67696276_G_A  | 392A>T  | Substitution | Nonsynonymous coding | 11% |
| MM18T | CAND2    | cullin-associated and neddylation-dissociated 2 (putative)        | CCDS43053.1  | chr3_12856730-12856730_G_T   | 273R>L  | Substitution | Nonsynonymous coding | 15% |
| MM18T | CANT1    | calcium activated nucleotidase 1                                  | CCDS11760.1  | chr17_76991294-76991294_G_C  | 214A>G  | Substitution | Nonsynonymous coding | 17% |
| MM18T | CAPN3    | calpain 3, (p94)                                                  | CCDS45245.1  | chr15_42689001-42689001_G_A  | 373W>X  | Substitution | Nonsense             | 12% |
| MM18T | CAPN6    | calpain 6                                                         | CCDS14555.1  | chrX_110491174-110491174_G_A | 511R>C  | Substitution | Nonsynonymous coding | 16% |
| MM18T | CAPN6    | calpain 6                                                         | CCDS14555.1  | chrX_110494880-110494880_G_T | 264L>I  | Substitution | Nonsynonymous coding | 10% |
| MM18T | CAPN7    | calpain 7                                                         | CCDS2624.1   | chr3_15262461-15262461_A_C   | 204Y>S  | Substitution | Nonsynonymous coding | 12% |
| MM18T | CAPSL    | calcyphosine-like                                                 | CCDS3912.2   | chr5_35921188-35921188_G_A   | 12A>V   | Substitution | Nonsynonymous coding | 12% |
| MM18T | CARD11   | caspase recruitment domain family, member 11                      | CCDS5336.2   | chr7_2962337-2962337_C_T     | 734E>K  | Substitution | Nonsynonymous coding | 12% |
| MM18T | CARD6    | caspase recruitment domain family, member 6                       | CCDS3935.1   | chr5_40852372-40852372_G_A   | 313R>Q  | Substitution | Nonsynonymous coding | 13% |
| MM18T | CARD6    | caspase recruitment domain family, member 6                       | CCDS3935.1   | chr5_40852985-40852985_A_C   | 517R>S  | Substitution | Nonsynonymous coding | 12% |
| MM18T | CARD6    | caspase recruitment domain family, member 6                       | CCDS3935.1   | chr5_40853767-40853767_G_A   | 778G>D  | Substitution | Nonsynonymous coding | 10% |
| MM18T | CARM1    | coactivator-associated arginine methyltransferase 1               | CCDS12250.1  | chr19_11031581-11031581_C_T  | 499T>M  | Substitution | Nonsynonymous coding | 17% |
| MM18T | CARNS1   | carnosine synthase 1                                              | CCDS44658.1  | chr11_67187223-67187223_G_T  | ISV-1>  | Substitution | Splice site acceptor | 17% |
| MM18T | CASK     | calcium/calmodulin-dependent serine protein kinase (MAGUK family) | CCDS14257.1  | chrX_41712460-41712460_C_T   | 27R>Q   | Substitution | Nonsynonymous coding | 13% |
| MM18T | CASP8AP2 | caspase 8 associated protein 2                                    | NM_001137667 | chr6_90573128-90573128_C_A   | 567S>Y  | Substitution | Nonsynonymous coding | 11% |
| MM18T | CASP8AP2 | caspase 8 associated protein 2                                    | NM_001137667 | chr6_90576837-90576837_G_T   | 1276Q>H | Substitution | Nonsynonymous coding | 13% |
| MM18T | CASR     | calcium-sensing receptor                                          | CCDS3010.1   | chr3_122003488-122003488_G_A | 896R>H  | Substitution | Nonsynonymous coding | 14% |
| MM18T | CASR     | calcium-sensing receptor                                          | CCDS3010.1   | chr3_121976238-121976238_C_A | ISV+4>  | Substitution | Splice site donor    | 14% |
| MM18T | CASS4    | Cas scaffolding protein family member 4                           | CCDS33492.1  | chr20_55033526-55033526_G_A  | 695S>N  | Substitution | Nonsynonymous coding | 14% |
| MM18T | CASZ1    | castor zinc finger 1                                              | CCDS41246.1  | chr1_10699886-10699886_C_T   | 1465G>S | Substitution | Nonsynonymous coding | 15% |
| MM18T | CATSPER1 | cation channel, sperm associated 1                                | CCDS8127.1   | chr11_65792902-65792902_C_T  | 317D>N  | Substitution | Nonsynonymous coding | 21% |
| MM18T | CATSPERG | catsper channel auxiliary subunit gamma                           | CCDS12514.2  | chr19_38837168-38837168_C_T  | 250L>F  | Substitution | Nonsynonymous coding | 13% |
| MM18T | CAV3     | caveolin 3                                                        | CCDS2569.1   | chr3_8787539-8787539_C_T     | 148R>W  | Substitution | Nonsynonymous coding | 16% |
| MM18T | CBLB     | Cbl proto-oncogene, E3 ubiquitin protein ligase B                 | CCDS2948.1   | chr3_105572298-105572298_C_A | 127E>X  | Substitution | Nonsense             | 11% |
| MM18T | CBX7     | chromobox homolog 7                                               | CCDS13986.1  | chr22_39530498-39530498_C_T  | 169R>Q  | Substitution | Nonsynonymous coding | 11% |
| MM18T | CCAR1    | cell division cycle and apoptosis regulator 1                     | CCDS7282.1   | chr10_70509019-70509019_G_A  | 318R>Q  | Substitution | Nonsynonymous coding | 18% |
| MM18T | CCBP2    | chemokine binding protein 2                                       | CCDS2706.1   | chr3_42906217-42906217_G_A   | 75V>M   | Substitution | Nonsynonymous coding | 15% |
| MM18T | CCDC105  | coiled-coil domain containing 105                                 | CCDS12322.1  | chr19_15132675-15132675_C_T  | 399R>C  | Substitution | Nonsynonymous coding | 22% |
| MM18T | CCDC106  | coiled-coil domain containing 106                                 | CCDS33118.1  | chr19_56162797-56162797_G_T  | 154Q>H  | Substitution | Nonsynonymous coding | 11% |
| MM18T | CCDC108  | coiled-coil domain containing 108                                 | CCDS2430.2   | chr2_219878022-219878022_A_C | 1306F>V | Substitution | Nonsynonymous coding | 14% |
| MM18T | CCDC11   | coiled-coil domain containing 11                                  | CCDS11940.2  | chr18_47777130-47777130__T   | NA      | Insertion    | Frameshift           | 17% |

|       |         |                                   |                 |                               |         |              |                      |     |
|-------|---------|-----------------------------------|-----------------|-------------------------------|---------|--------------|----------------------|-----|
| MM18T | CCDC110 | coiled-coil domain containing 110 | CCDS3843.1      | chr4_186382208-186382208_C_T  | 115D>N  | Substitution | Nonsynonymous coding | 23% |
| MM18T | CCDC114 | coiled-coil domain containing 114 | CCDS12714.2     | chr19_48800876-48800876_C_T   | 481E>K  | Substitution | Nonsynonymous coding | 14% |
| MM18T | CCDC125 | coiled-coil domain containing 125 | CCDS4000.1      | chr5_68578804-68578804_G_A    | 430R>W  | Substitution | Nonsynonymous coding | 14% |
| MM18T | CCDC127 | coiled-coil domain containing 127 | CCDS3852.1      | chr5_205951-205951_G_A        | 82R>W   | Substitution | Nonsynonymous coding | 12% |
| MM18T | CCDC13  | coiled-coil domain containing 13  | CCDS2705.1      | chr3_42794090-42794090_G_A    | 164R>C  | Substitution | Nonsynonymous coding | 11% |
| MM18T | CCDC135 | coiled-coil domain containing 135 | CCDS10787.1     | chr16_57765147-57765147_G_A   | 868E>K  | Substitution | Nonsynonymous coding | 16% |
| MM18T | CCDC14  | coiled-coil domain containing 14  | CCDS3025.2      | chr3_123665963-123665963_T_G  | 303E>D  | Substitution | Nonsynonymous coding | 14% |
| MM18T | CCDC14  | coiled-coil domain containing 14  | CCDS3025.2      | chr3_123649959-123649959_C_A  | 597E>X  | Substitution | Nonsense             | 10% |
| MM18T | CCDC141 | coiled-coil domain containing 141 | ENST00000295723 | chr2_179699038-179699038_G_T  | 910N>K  | Substitution | Nonsynonymous coding | 12% |
| MM18T | CCDC142 | coiled-coil domain containing 142 | CCDS1945.1      | chr2_74702391-74702391_G_A    | 579A>V  | Substitution | Nonsynonymous coding | 11% |
| MM18T | CCDC147 | coiled-coil domain containing 147 | CCDS31282.1     | chr10_106130743-106130743_G_A | 341E>K  | Substitution | Nonsynonymous coding | 11% |
| MM18T | CCDC147 | coiled-coil domain containing 147 | CCDS31282.1     | chr10_106139947-106139947_A_T | 445Y>F  | Substitution | Nonsynonymous coding | 15% |
| MM18T | CCDC147 | coiled-coil domain containing 147 | CCDS31282.1     | chr10_106153205-106153205_G_A | 549R>Q  | Substitution | Nonsynonymous coding | 15% |
| MM18T | CCDC151 | coiled-coil domain containing 151 | CCDS42501.1     | chr19_11536981-11536981_C_T   | 316E>K  | Substitution | Nonsynonymous coding | 15% |
| MM18T | CCDC154 | coiled-coil domain containing 154 | NM_001143980    | chr16_1489082-1489082_T_G     | 241K>Q  | Substitution | Nonsynonymous coding | 22% |
| MM18T | CCDC155 | coiled-coil domain containing 155 | CCDS46140.1     | chr19_49902293-49902293_C_T   | 214A>V  | Substitution | Nonsynonymous coding | 14% |
| MM18T | CCDC160 | coiled-coil domain containing 160 | CCDS48171.1     | chrX_133379275-133379275_C_A  | 149L>I  | Substitution | Nonsynonymous coding | 12% |
| MM18T | CCDC164 | coiled-coil domain containing 164 | CCDS1723.1      | chr2_26673521-26673521_G_A    | 554R>Q  | Substitution | Nonsynonymous coding | 13% |
| MM18T | CCDC170 | coiled-coil domain containing 170 | CCDS43515.1     | chr6_151869452-151869452_G_A  | 201R>H  | Substitution | Nonsynonymous coding | 15% |
| MM18T | CCDC18  | coiled-coil domain containing 18  | ENST00000370276 | chr1_93735970-93735970_C_A    | 1317L>M | Substitution | Nonsynonymous coding | 13% |
| MM18T | CCDC19  | coiled-coil domain containing 19  | CCDS30914.1     | chr1_159847189-159847189_C_T  | 370A>T  | Substitution | Nonsynonymous coding | 11% |
| MM18T | CCDC27  | coiled-coil domain containing 27  | CCDS50.1        | chr1_3669218-3669218_C_T      | 58S>L   | Substitution | Nonsynonymous coding | 13% |
| MM18T | CCDC27  | coiled-coil domain containing 27  | CCDS50.1        | chr1_3680299-3680299_G_A      | 451D>N  | Substitution | Nonsynonymous coding | 11% |
| MM18T | CCDC33  | coiled-coil domain containing 33  | CCDS42058.1     | chr15_74564116-74564116_C_T   | 207P>S  | Substitution | Nonsynonymous coding | 18% |
| MM18T | CCDC40  | coiled-coil domain containing 40  | CCDS42395.1     | chr17_78013905-78013905_G_A   | 130D>N  | Substitution | Nonsynonymous coding | 21% |
| MM18T | CCDC40  | coiled-coil domain containing 40  | CCDS42395.1     | chr17_78013959-78013959_C_G   | 148P>A  | Substitution | Nonsynonymous coding | 12% |
| MM18T | CCDC40  | coiled-coil domain containing 40  | CCDS42395.1     | chr17_78073352-78073352_G_T   | 1069Q>H | Substitution | Nonsynonymous coding | 17% |
| MM18T | CCDC41  | coiled-coil domain containing 41  | CCDS41820.1     | chr12_94725498-94725498_C_T   | 562R>Q  | Substitution | Nonsynonymous coding | 12% |
| MM18T | CCDC41  | coiled-coil domain containing 41  | CCDS41820.1     | chr12_94772794-94772794_C_A   | 192E>X  | Substitution | Nonsense             | 18% |
| MM18T | CCDC51  | coiled-coil domain containing 51  | CCDS2766.2      | chr3_48475281-48475281_C_T    | 105A>T  | Substitution | Nonsynonymous coding | 12% |
| MM18T | CCDC57  | coiled-coil domain containing 57  | NM_198082       | chr17_80136982-80136982_C_T   | 432R>H  | Substitution | Nonsynonymous coding | 15% |
| MM18T | CCDC60  | coiled-coil domain containing 60  | CCDS9190.1      | chr12_119937911-119937911__A  | NA      | Insertion    | Frameshift           | 16% |

|       |           |                                                                  |                 |                               |         |              |                      |     |
|-------|-----------|------------------------------------------------------------------|-----------------|-------------------------------|---------|--------------|----------------------|-----|
| MM18T | CCDC63    | coiled-coil domain containing 63                                 | CCDS9151.1      | chr12_111291217-111291217_G_T | 6K>N    | Substitution | Nonsynonymous coding | 14% |
| MM18T | CCDC63    | coiled-coil domain containing 63                                 | CCDS9151.1      | chr12_111296389-111296389_G_A | ISV-1>  | Substitution | Splice site acceptor | 20% |
| MM18T | CCDC68    | coiled-coil domain containing 68                                 | CCDS11959.1     | chr18_52609979-52609979_T_G   | 15K>T   | Substitution | Nonsynonymous coding | 13% |
| MM18T | CCDC69    | coiled-coil domain containing 69                                 | CCDS4312.1      | chr5_150581184-150581184_G_T  | 64L>I   | Substitution | Nonsynonymous coding | 14% |
| MM18T | CCDC71    | coiled-coil domain containing 71                                 | CCDS2790.1      | chr3_49200944-49200944_C_T    | 233S>N  | Substitution | Nonsynonymous coding | 15% |
| MM18T | CCDC80    | coiled-coil domain containing 80                                 | CCDS2968.1      | chr3_112324443-112324443_A_C  | 892L>V  | Substitution | Nonsynonymous coding | 11% |
| MM18T | CCDC85C   | coiled-coil domain containing 85C                                | CCDS45161.1     | chr14_99981651-99981651_C_A   | 398D>Y  | Substitution | Nonsynonymous coding | 11% |
| MM18T | CCDC85C   | coiled-coil domain containing 85C                                | CCDS45161.1     | chr14_99983448-99983448_C_T   | 350E>K  | Substitution | Nonsynonymous coding | 14% |
| MM18T | CCDC86    | coiled-coil domain containing 86                                 | CCDS7993.1      | chr11_60610247-60610247_C_T   | 217S>F  | Substitution | Nonsynonymous coding | 19% |
| MM18T | CCDC87    | coiled-coil domain containing 87                                 | CCDS8145.1      | chr11_66359223-66359223_A_C   | 422F>V  | Substitution | Nonsynonymous coding | 15% |
| MM18T | CCDC87    | coiled-coil domain containing 87                                 | CCDS8145.1      | chr11_66359769-66359769_G_T   | 240L>I  | Substitution | Nonsynonymous coding | 17% |
| MM18T | CCDC88A   | coiled-coil domain containing 88A                                | CCDS46288.1     | chr2_55529064-55529064_A_C    | 1538F>C | Substitution | Nonsynonymous coding | 11% |
| MM18T | CCDC88A   | coiled-coil domain containing 88A                                | CCDS46288.1     | chr2_55536038-55536038_G_T    | 1431L>I | Substitution | Nonsynonymous coding | 10% |
| MM18T | CCDC97    | coiled-coil domain containing 97                                 | CCDS12578.1     | chr19_41822729-41822729_C_T   | 163R>X  | Substitution | Nonsense             | 22% |
| MM18T | CCDS757.1 | -                                                                | CCDS757.1       | chr1_99772327-99772327_C_T    | 685R>C  | Substitution | Nonsynonymous coding | 12% |
| MM18T | CCKAR     | cholecystokinin A receptor                                       | CCDS3438.1      | chr4_26483643-26483643_C_T    | 302A>T  | Substitution | Nonsynonymous coding | 21% |
| MM18T | CCKAR     | cholecystokinin A receptor                                       | CCDS3438.1      | chr4_26484786-26484786_G_T    | 249S>Y  | Substitution | Nonsynonymous coding | 17% |
| MM18T | CCL14     | chemokine (C-C motif) ligand 14                                  | CCDS45652.1     | chr17_34311432-34311432_G_A   | 62R>C   | Substitution | Nonsynonymous coding | 11% |
| MM18T | CCNK      | cyclin K                                                         | CCDS45160.1     | chr14_99959067-99959067_A_G   | 18D>G   | Substitution | Nonsynonymous coding | 13% |
| MM18T | CCNL1     | cyclin L1                                                        | CCDS3178.1      | chr3_156866178-156866178_G_T  | 478S>Y  | Substitution | Nonsynonymous coding | 12% |
| MM18T | CCNYL2    | cyclin Y-like 2                                                  | ENST00000426433 | chr10_42920818-42920818_C_T   | 198R>H  | Substitution | Nonsynonymous coding | 20% |
| MM18T | CCPG1     | cell cycle progression 1                                         | CCDS42039.1     | chr15_55652493-55652493_A_C   | 493F>C  | Substitution | Nonsynonymous coding | 13% |
| MM18T | CCPG1     | cell cycle progression 1                                         | CCDS42039.1     | chr15_55664233-55664233_G_T   | 155S>Y  | Substitution | Nonsynonymous coding | 11% |
| MM18T | CCR4      | chemokine (C-C motif) receptor 4                                 | CCDS2656.1      | chr3_32995459-32995459_G_A    | 182R>H  | Substitution | Nonsynonymous coding | 14% |
| MM18T | CCR9      | chemokine (C-C motif) receptor 9                                 | ENST00000422395 | chr3_45939068-45939068_G_A    | 13A>T   | Substitution | Nonsynonymous coding | 13% |
| MM18T | CCR9      | chemokine (C-C motif) receptor 9                                 | CCDS2732.1      | chr3_45942661-45942661_G_T    | 127K>N  | Substitution | Nonsynonymous coding | 13% |
| MM18T | CCSER1    | coiled-coil serine-rich protein 1                                | CCDS47099.1     | chr4_91229455-91229455_G_A    | 7R>K    | Substitution | Nonsynonymous coding | 18% |
| MM18T | CCT3      | chaperonin containing TCP1, subunit 3 (gamma)                    | CCDS1140.2      | chr1_156307954-156307954_G_T  | 8L>I    | Substitution | Nonsynonymous coding | 11% |
| MM18T | CCT8L1P   | chaperonin containing TCP1, subunit 8 (theta)-like 1, pseudogene | ENST00000021776 | chr7_152142670-152142670_T_G  | 37L>V   | Substitution | Nonsynonymous coding | 14% |
| MM18T | CD101     | CD101 molecule                                                   | CCDS891.1       | chr1_117556219-117556219_G_T  | 345A>S  | Substitution | Nonsynonymous coding | 14% |
| MM18T | CD109     | CD109 molecule                                                   | CCDS4982.1      | chr6_74492482-74492482_A_T    | ISV+4>  | Substitution | Splice site donor    | 13% |
| MM18T | CD163L1   | CD163 molecule-like 1                                            | CCDS8577.1      | chr12_7522127-7522127_A_G     | 1289C>R | Substitution | Nonsynonymous coding | 20% |

|       |          |                                                                              |             |                               |        |              |                      |     |
|-------|----------|------------------------------------------------------------------------------|-------------|-------------------------------|--------|--------------|----------------------|-----|
| MM18T | CD163L1  | CD163 molecule-like 1                                                        | CCDS8577.1  | chr12_7531675-7531675_G_T     | 757S>Y | Substitution | Nonsynonymous coding | 15% |
| MM18T | CD180    | CD180 molecule                                                               | CCDS3992.1  | chr5_66479451-66479451_T_G    | 407E>A | Substitution | Nonsynonymous coding | 11% |
| MM18T | CD200R1L | CD200 receptor 1-like                                                        | CCDS43131.1 | chr3_112546080-112546080_C_T  | 147E>K | Substitution | Nonsynonymous coding | 13% |
| MM18T | CD22     | CD22 molecule                                                                | CCDS12457.1 | chr19_35832623-35832623_G_A   | 597R>H | Substitution | Nonsynonymous coding | 14% |
| MM18T | CD226    | CD226 molecule                                                               | CCDS11997.1 | chr18_67531606-67531606_C_A   | 319E>X | Substitution | Nonsense             | 14% |
| MM18T | CD34     | CD34 molecule                                                                | CCDS31011.1 | chr1_208062147-208062147_C_A  | 284Q>H | Substitution | Nonsynonymous coding | 22% |
| MM18T | CD36     | CD36 molecule (thrombospondin receptor)                                      | CCDS34673.1 | chr7_80292433-80292433_T_A    | 186F>Y | Substitution | Nonsynonymous coding | 12% |
| MM18T | CD37     | CD37 molecule                                                                | CCDS12760.1 | chr19_49838839-49838839_C_A   | 14F>L  | Substitution | Nonsynonymous coding | 16% |
| MM18T | CD4      | CD4 molecule                                                                 | CCDS8562.1  | chr12_6909473-6909473_C_T     | 17A>V  | Substitution | Nonsynonymous coding | 13% |
| MM18T | CD55     | CD55 molecule, decay accelerating factor for complement (Cromer blood group) | CCDS44307.1 | chr1_207532898-207532898_G_A  | 403V>M | Substitution | Nonsynonymous coding | 18% |
| MM18T | CD83     | CD83 molecule                                                                | CCDS4532.1  | chr6_14133895-14133895_G_A    | 133R>H | Substitution | Nonsynonymous coding | 15% |
| MM18T | CD86     | CD86 molecule                                                                | CCDS3009.1  | chr3_121822659-121822659_G_A  | 122R>H | Substitution | Nonsynonymous coding | 13% |
| MM18T | CD8A     | CD8a molecule                                                                | CCDS1992.1  | chr2_87017582-87017582_C_A    | 91G>V  | Substitution | Nonsynonymous coding | 13% |
| MM18T | CD93     | CD93 molecule                                                                | CCDS13149.1 | chr20_23066249-23066249_C_A   | 194G>V | Substitution | Nonsynonymous coding | 11% |
| MM18T | CDADC1   | cytidine and dCMP deaminase domain containing 1                              | CCDS9415.1  | chr13_49841856-49841856_C_T   | 221P>S | Substitution | Nonsynonymous coding | 13% |
| MM18T | CDAN1    | codanin 1                                                                    | CCDS32209.1 | chr15_43021278-43021278_C_T   | 863R>H | Substitution | Nonsynonymous coding | 17% |
| MM18T | CDAN1    | codanin 1                                                                    | CCDS32209.1 | chr15_43022380-43022380_C_A   | 736K>N | Substitution | Nonsynonymous coding | 12% |
| MM18T | CDC16    | cell division cycle 16                                                       | CCDS9542.2  | chr13_115002309-115002309_C_A | 47L>I  | Substitution | Nonsynonymous coding | 12% |
| MM18T | CDC20B   | cell division cycle 20B                                                      | CCDS3966.1  | chr5_54424341-54424341_C_A    | 268D>Y | Substitution | Nonsynonymous coding | 22% |
| MM18T | CDC25C   | cell division cycle 25C                                                      | CCDS4202.1  | chr5_137621513-137621513_C_A  | 430Q>H | Substitution | Nonsynonymous coding | 16% |
| MM18T | CDC25C   | cell division cycle 25C                                                      | CCDS4202.1  | chr5_137661504-137661504_A_C  | 153N>K | Substitution | Nonsynonymous coding | 13% |
| MM18T | CDC40    | cell division cycle 40                                                       | CCDS5081.1  | chr6_110540612-110540612_T_G  | 379V>G | Substitution | Nonsynonymous coding | 10% |
| MM18T | CDH10    | cadherin 10, type 2 (T2-cadherin)                                            | CCDS3892.1  | chr5_24509697-24509697_C_A    | 412D>Y | Substitution | Nonsynonymous coding | 13% |
| MM18T | CDH10    | cadherin 10, type 2 (T2-cadherin)                                            | CCDS3892.1  | chr5_24593455-24593455_G_T    | 49L>I  | Substitution | Nonsynonymous coding | 12% |
| MM18T | CDH12    | cadherin 12, type 2 (N-cadherin 2)                                           | CCDS3890.1  | chr5_21751910-21751910_C_T    | 774R>H | Substitution | Nonsynonymous coding | 12% |
| MM18T | CDH12    | cadherin 12, type 2 (N-cadherin 2)                                           | CCDS3890.1  | chr5_21765161-21765161_C_T    | 481D>N | Substitution | Nonsynonymous coding | 11% |
| MM18T | CDH15    | cadherin 15, type 1, M-cadherin (myotubule)                                  | CCDS10976.1 | chr16_89260307-89260307_G_A   | 713D>N | Substitution | Nonsynonymous coding | 35% |
| MM18T | CDH16    | cadherin 16, KSP-cadherin                                                    | CCDS10823.1 | chr16_66946177-66946177_C_A   | 506D>Y | Substitution | Nonsynonymous coding | 11% |
| MM18T | CDH2     | cadherin 2, type 1, N-cadherin (neuronal)                                    | CCDS11891.1 | chr18_25572744-25572744_C_T   | 407D>N | Substitution | Nonsynonymous coding | 19% |
| MM18T | CDH2     | cadherin 2, type 1, N-cadherin (neuronal)                                    | CCDS11891.1 | chr18_25589815-25589815_T_G   | 190N>H | Substitution | Nonsynonymous coding | 14% |
| MM18T | CDH23    | cadherin-related 23                                                          | CCDS44429.1 | chr10_73330614-73330614_A_G   | 231D>G | Substitution | Nonsynonymous coding | 13% |
| MM18T | CDH23    | cadherin-related 23                                                          | CCDS44429.1 | chr10_73405681-73405681_C_T   | 412R>C | Substitution | Nonsynonymous coding | 16% |

|       |          |                                                                               |                 |                              |         |              |                      |     |
|-------|----------|-------------------------------------------------------------------------------|-----------------|------------------------------|---------|--------------|----------------------|-----|
| MM18T | CDH23    | cadherin-related 23                                                           | NM_022124       | chr10_73553178-73553178_G_A  | 2165D>N | Substitution | Nonsynonymous coding | 11% |
| MM18T | CDH26    | cadherin 26                                                                   | CCDS13485.1     | chr20_58547152-58547152_G_A  | 123D>N  | Substitution | Nonsynonymous coding | 12% |
| MM18T | CDH26    | cadherin 26                                                                   | CCDS13485.1     | chr20_58570886-58570886_A_G  | ISV-2>  | Substitution | Splice site acceptor | 11% |
| MM18T | CDH4     | cadherin 4, type 1, R-cadherin (retinal)                                      | CCDS13488.1     | chr20_60448937-60448937_C_T  | 344A>V  | Substitution | Nonsynonymous coding | 18% |
| MM18T | CDH6     | cadherin 6, type 2, K-cadherin (fetal kidney)                                 | CCDS3894.1      | chr5_31313464-31313464_C_A   | 431F>L  | Substitution | Nonsynonymous coding | 12% |
| MM18T | CDH7     | cadherin 7, type 2                                                            | CCDS11993.1     | chr18_63526205-63526205_C_A  | 473L>I  | Substitution | Nonsynonymous coding | 16% |
| MM18T | CDH8     | cadherin 8, type 2                                                            | CCDS10802.1     | chr16_61687595-61687595_A_C  | 773F>V  | Substitution | Nonsynonymous coding | 13% |
| MM18T | CDH8     | cadherin 8, type 2                                                            | CCDS10802.1     | chr16_61851510-61851510_C_A  | 384D>Y  | Substitution | Nonsynonymous coding | 14% |
| MM18T | CDH9     | cadherin 9, type 2 (T1-cadherin)                                              | CCDS3893.1      | chr5_26885919-26885919_G_T   | 562S>R  | Substitution | Nonsynonymous coding | 13% |
| MM18T | CDHR2    | cadherin-related family member 2                                              | CCDS34297.1     | chr5_176004548-176004548_C_T | 448A>V  | Substitution | Nonsynonymous coding | 20% |
| MM18T | CDHR3    | cadherin-related family member 3                                              | CCDS47684.1     | chr7_105636781-105636781_G_A | 232E>K  | Substitution | Nonsynonymous coding | 11% |
| MM18T | CDHR3    | cadherin-related family member 3                                              | CCDS47684.1     | chr7_105672847-105672847_G_A | 788E>K  | Substitution | Nonsynonymous coding | 12% |
| MM18T | CDK13    | cyclin-dependent kinase 13                                                    | CCDS5461.1      | chr7_40037130-40037130_G_T   | 637E>X  | Substitution | Nonsense             | 12% |
| MM18T | CDK14    | cyclin-dependent kinase 14                                                    | CCDS5619.1      | chr7_90747495-90747495_A_G   | 452*>W  | Substitution | Nonsynonymous coding | 11% |
| MM18T | CDK16    | cyclin-dependent kinase 16                                                    | CCDS48101.1     | chrX_47088029-47088029_C_T   | 486S>L  | Substitution | Nonsynonymous coding | 11% |
| MM18T | CDKAL1   | CDK5 regulatory subunit associated protein 1-like 1                           | CCDS4546.1      | chr6_20548856-20548856_G_A   | 69R>Q   | Substitution | Nonsynonymous coding | 14% |
| MM18T | CDKL2    | cyclin-dependent kinase-like 2 (CDC2-related kinase)                          | CCDS3570.1      | chr4_76529053-76529053_G_T   | 248P>H  | Substitution | Nonsynonymous coding | 15% |
| MM18T | CDS2     | CDP-diacylglycerol synthase (phosphatidate cytidyltransferase) 2              | CCDS13088.1     | chr20_5170822-5170822_C_T    | 427T>M  | Substitution | Nonsynonymous coding | 16% |
| MM18T | CDX2     | caudal type homeobox 2                                                        | CCDS9328.1      | chr13_28543077-28543077_C_T  | 23G>S   | Substitution | Nonsynonymous coding | 18% |
| MM18T | CEACAM18 | carcinoembryonic antigen-related cell adhesion molecule 18                    | CCDS46159.1     | chr19_51983739-51983739_G_A  | 130A>T  | Substitution | Nonsynonymous coding | 13% |
| MM18T | CEACAM20 | carcinoembryonic antigen-related cell adhesion molecule 20                    | ENST00000445209 | chr19_45024618-45024618_C_A  | 307R>M  | Substitution | Nonsynonymous coding | 15% |
| MM18T | CEACAM7  | carcinoembryonic antigen-related cell adhesion molecule 7                     | CCDS12583.1     | chr19_42190807-42190807_C_T  | 137R>K  | Substitution | Nonsynonymous coding | 13% |
| MM18T | CEACAM8  | carcinoembryonic antigen-related cell adhesion molecule 8                     | CCDS12610.1     | chr19_43097693-43097693_G_A  | 142P>S  | Substitution | Nonsynonymous coding | 17% |
| MM18T | CECR2    | cat eye syndrome chromosome region, candidate 2                               | ENST00000400573 | chr22_18029083-18029083_C_T  | 1347A>V | Substitution | Nonsynonymous coding | 16% |
| MM18T | CECR5    | cat eye syndrome chromosome region, candidate 5                               | CCDS33595.1     | chr22_17629362-17629362_C_T  | 140G>E  | Substitution | Nonsynonymous coding | 16% |
| MM18T | CECR6    | cat eye syndrome chromosome region, candidate 6                               | CCDS13740.1     | chr22_17600508-17600508_G_T  | 504L>I  | Substitution | Nonsynonymous coding | 20% |
| MM18T | CEL      | carboxyl ester lipase (bile salt-stimulated lipase)                           | CCDS43896.1     | chr9_135942509-135942509_C_T | 274A>V  | Substitution | Nonsynonymous coding | 11% |
| MM18T | CELSR1   | cadherin, EGF LAG seven-pass G-type receptor 1 (flamingo homolog, Drosophila) | CCDS14076.1     | chr22_46930772-46930772_C_T  | 766D>N  | Substitution | Nonsynonymous coding | 21% |
| MM18T | CELSR1   | cadherin, EGF LAG seven-pass G-type receptor 1 (flamingo homolog, Drosophila) | CCDS14076.1     | chr22_46932173-46932173_C_T  | 299D>N  | Substitution | Nonsynonymous coding | 23% |
| MM18T | CELSR2   | cadherin, EGF LAG seven-pass G-type receptor 2 (flamingo homolog, Drosophila) | CCDS796.1       | chr1_109794669-109794669_C_A | 656F>L  | Substitution | Nonsynonymous coding | 25% |
| MM18T | CELSR3   | cadherin, EGF LAG seven-pass G-type receptor 3 (flamingo homolog, Drosophila) | CCDS2775.1      | chr3_48677230-48677230_G_T   | 3263S>Y | Substitution | Nonsynonymous coding | 14% |
| MM18T | CELSR3   | cadherin, EGF LAG seven-pass G-type receptor 3 (flamingo homolog, Drosophila) | CCDS2775.1      | chr3_48694697-48694697_C_T   | 1278R>H | Substitution | Nonsynonymous coding | 13% |

|       |         |                                                                 |             |                               |         |              |                      |     |
|-------|---------|-----------------------------------------------------------------|-------------|-------------------------------|---------|--------------|----------------------|-----|
| MM18T | CENPF   | centromere protein F, 350/400kDa                                | CCDS31023.1 | chr1_214794040-214794040_G_A  | 206D>N  | Substitution | Nonsynonymous coding | 11% |
| MM18T | CENPF   | centromere protein F, 350/400kDa                                | CCDS31023.1 | chr1_214794142-214794142_G_T  | 240D>Y  | Substitution | Nonsynonymous coding | 21% |
| MM18T | CENPI   | centromere protein I                                            | CCDS14479.1 | chrX_100395748-100395748_C_A  | 522L>I  | Substitution | Nonsynonymous coding | 13% |
| MM18T | CENPJ   | centromere protein J                                            | CCDS9310.1  | chr13_25483943-25483943_G_A   | 284R>C  | Substitution | Nonsynonymous coding | 15% |
| MM18T | CENPJ   | centromere protein J                                            | CCDS9310.1  | chr13_25480480-25480480_G_A   | 566R>X  | Substitution | Nonsense             | 11% |
| MM18T | CEP104  | centrosomal protein 104kDa                                      | CCDS30571.1 | chr1_3765296-3765296_G_A      | 55R>X   | Substitution | Nonsense             | 15% |
| MM18T | CEP112  | centrosomal protein 112kDa                                      | CCDS32710.1 | chr17_63746812-63746812_C_A   | 809E>X  | Substitution | Nonsense             | 11% |
| MM18T | CEP120  | centrosomal protein 120kDa                                      | CCDS4134.2  | chr5_122724138-122724138_T_C  | 473N>S  | Substitution | Nonsynonymous coding | 11% |
| MM18T | CEP120  | centrosomal protein 120kDa                                      | CCDS4134.2  | chr5_122726812-122726812_C_A  | 344D>Y  | Substitution | Nonsynonymous coding | 17% |
| MM18T | CEP128  | centrosomal protein 128kDa                                      | CCDS32130.1 | chr14_81046749-81046749_T_C   | 942Q>R  | Substitution | Nonsynonymous coding | 12% |
| MM18T | CEP128  | centrosomal protein 128kDa                                      | CCDS32130.1 | chr14_81251316-81251316_C_T   | 712E>K  | Substitution | Nonsynonymous coding | 13% |
| MM18T | CEP128  | centrosomal protein 128kDa                                      | CCDS32130.1 | chr14_81382803-81382803_C_T   | 30R>Q   | Substitution | Nonsynonymous coding | 10% |
| MM18T | CEP135  | centrosomal protein 135kDa                                      | CCDS33986.1 | chr4_56875983-56875983_G_A    | 807D>N  | Substitution | Nonsynonymous coding | 13% |
| MM18T | CEP152  | centrosomal protein 152kDa                                      | CCDS42033.1 | chr15_49048406-49048406_C_A   | 1013E>D | Substitution | Nonsynonymous coding | 17% |
| MM18T | CEP152  | centrosomal protein 152kDa                                      | CCDS42033.1 | chr15_49090203-49090203_C_T   | 45D>N   | Substitution | Nonsynonymous coding | 13% |
| MM18T | CEP170B | centrosomal protein 170B                                        | CCDS45175.1 | chr14_105353281-105353281_G_A | 902R>H  | Substitution | Nonsynonymous coding | 14% |
| MM18T | CEP250  | centrosomal protein 250kDa                                      | CCDS13255.1 | chr20_34090225-34090225_G_A   | 1343R>Q | Substitution | Nonsynonymous coding | 16% |
| MM18T | CEP250  | centrosomal protein 250kDa                                      | CCDS13255.1 | chr20_34090724-34090724_G_T   | 1509Q>H | Substitution | Nonsynonymous coding | 12% |
| MM18T | CEP350  | centrosomal protein 350kDa                                      | CCDS1336.1  | chr1_179990023-179990023_C_A  | 1038F>L | Substitution | Nonsynonymous coding | 13% |
| MM18T | CEP350  | centrosomal protein 350kDa                                      | CCDS1336.1  | chr1_180034394-180034394_C_T  | 1852R>C | Substitution | Nonsynonymous coding | 11% |
| MM18T | CEP350  | centrosomal protein 350kDa                                      | CCDS1336.1  | chr1_180063032-180063032_A_G  | 2598T>A | Substitution | Nonsynonymous coding | 14% |
| MM18T | CEP41   | centrosomal protein 41kDa                                       | CCDS5821.1  | chr7_130056775-130056775_C_T  | 44E>K   | Substitution | Nonsynonymous coding | 16% |
| MM18T | CEP55   | centrosomal protein 55kDa                                       | CCDS7428.1  | chr10_95278686-95278686_T_C   | 349V>A  | Substitution | Nonsynonymous coding | 26% |
| MM18T | CEP57   | centrosomal protein 57kDa                                       | CCDS8304.1  | chr11_95550970-95550970_G_A   | 175R>Q  | Substitution | Nonsynonymous coding | 11% |
| MM18T | CEP72   | centrosomal protein 72kDa                                       | CCDS34126.1 | chr5_620208-620208_G_A        | 79E>K   | Substitution | Nonsynonymous coding | 14% |
| MM18T | CEP72   | centrosomal protein 72kDa                                       | CCDS34126.1 | chr5_635661-635661_G_A        | 289R>H  | Substitution | Nonsynonymous coding | 35% |
| MM18T | CEP85L  | centrosomal protein 85kDa-like                                  | CCDS43498.1 | chr6_118887020-118887020_T_G  | 231K>T  | Substitution | Nonsynonymous coding | 10% |
| MM18T | CEP89   | centrosomal protein 89kDa                                       | CCDS32987.1 | chr19_33450807-33450807_G_A   | 102R>W  | Substitution | Nonsynonymous coding | 25% |
| MM18T | CEP97   | centrosomal protein 97kDa                                       | CCDS2944.1  | chr3_101476591-101476591_G_T  | 381D>Y  | Substitution | Nonsynonymous coding | 11% |
| MM18T | CER1    | cerberus 1, cysteine knot superfamily, homolog (Xenopus laevis) | CCDS6476.1  | chr9_14722216-14722216_A_G    | 152I>T  | Substitution | Nonsynonymous coding | 12% |
| MM18T | CERCAM  | cerebral endothelial cell adhesion molecule                     | CCDS6901.2  | chr9_131183313-131183313_C_A  | 53L>M   | Substitution | Nonsynonymous coding | 14% |
| MM18T | CERCAM  | cerebral endothelial cell adhesion molecule                     | CCDS6901.2  | chr9_131186786-131186786_C_T  | 220S>F  | Substitution | Nonsynonymous coding | 30% |



|       |        |                                                                                         |             |                              |         |              |                      |     |
|-------|--------|-----------------------------------------------------------------------------------------|-------------|------------------------------|---------|--------------|----------------------|-----|
| MM18T | CESSA  | carboxylesterase 5A                                                                     | CCDS45490.1 | chr16_55895345-55895345_C_A  | 298K>N  | Substitution | Nonsynonymous coding | 16% |
| MM18T | CFB    | complement factor B [Source:HGNC Symbol;Acc:1037]                                       | CCDS4729.1  | chr6_31919776-31919776_A_T   | 755K>I  | Substitution | Nonsynonymous coding | 15% |
| MM18T | CFH    | complement factor H                                                                     | CCDS1385.1  | chr1_196694262-196694262_G_A | 570E>K  | Substitution | Nonsynonymous coding | 11% |
| MM18T | CFP    | complement factor properdin                                                             | CCDS14282.1 | chrX_47485488-47485488_G_A   | 405R>C  | Substitution | Nonsynonymous coding | 15% |
| MM18T | CFP    | complement factor properdin                                                             | CCDS14282.1 | chrX_47485556-47485556_C_A   | 382W>L  | Substitution | Nonsynonymous coding | 12% |
| MM18T | CFTR   | cystic fibrosis transmembrane conductance regulator (ATP-binding cassette sub-family C, | CCDS5773.1  | chr7_117232394-117232394_G_A | 725E>K  | Substitution | Nonsynonymous coding | 12% |
| MM18T | CGGBP1 | CGG triplet repeat binding protein 1                                                    | CCDS43111.1 | chr3_88105093-88105093_G_A   | 12R>X   | Substitution | Nonsense             | 12% |
| MM18T | CGN    | cingulin                                                                                | CCDS999.1   | chr1_151493159-151493159_G_T | 378E>X  | Substitution | Nonsense             | 12% |
| MM18T | CGNL1  | cingulin-like 1                                                                         | CCDS10161.1 | chr15_57730569-57730569_G_T  | 124E>D  | Substitution | Nonsynonymous coding | 14% |
| MM18T | CHCHD6 | coiled-coil-helix-coiled-coil-helix domain containing 6                                 | CCDS3041.1  | chr3_126449407-126449407_C_T | 67S>F   | Substitution | Nonsynonymous coding | 13% |
| MM18T | CHCHD6 | coiled-coil-helix-coiled-coil-helix domain containing 6                                 | CCDS3041.1  | chr3_126676323-126676323_C_T | 211R>C  | Substitution | Nonsynonymous coding | 15% |
| MM18T | CHD5   | chromodomain helicase DNA binding protein 5                                             | CCDS57.1    | chr1_6166798-6166798_C_T     | 1874D>N | Substitution | Nonsynonymous coding | 11% |
| MM18T | CHD5   | chromodomain helicase DNA binding protein 5                                             | CCDS57.1    | chr1_6211099-6211099_C_A     | 329K>N  | Substitution | Nonsynonymous coding | 12% |
| MM18T | CHD7   | chromodomain helicase DNA binding protein 7                                             | CCDS47865.1 | chr8_61754489-61754489_C_A   | 1576F>L | Substitution | Nonsynonymous coding | 11% |
| MM18T | CHD7   | chromodomain helicase DNA binding protein 7                                             | CCDS47865.1 | chr8_61766036-61766036_C_T   | 2251S>L | Substitution | Nonsynonymous coding | 15% |
| MM18T | CHD8   | chromodomain helicase DNA binding protein 8                                             | CCDS45081.1 | chr14_21865999-21865999_G_T  | 1399F>L | Substitution | Nonsynonymous coding | 13% |
| MM18T | CHD8   | chromodomain helicase DNA binding protein 8                                             | CCDS45081.1 | chr14_21869635-21869635_G_T  | 1088S>Y | Substitution | Nonsynonymous coding | 15% |
| MM18T | CHD9   | chromodomain helicase DNA binding protein 9                                             | CCDS45485.1 | chr16_53289620-53289620_G_A  | 1380D>N | Substitution | Nonsynonymous coding | 15% |
| MM18T | CHDC2  | calponin homology domain containing 2                                                   | CCDS14238.1 | chrX_36156513-36156513_G_T   | 398E>X  | Substitution | Nonsense             | 10% |
| MM18T | CHIT1  | chitinase 1 (chitotriosidase)                                                           | CCDS1436.1  | chr1_203188348-203188348_G_A | 342T>I  | Substitution | Nonsynonymous coding | 13% |
| MM18T | CHL1   | cell adhesion molecule with homology to L1CAM (close homolog of L1)                     | CCDS2556.1  | chr3_443323-443323_G_T       | 1134D>Y | Substitution | Nonsynonymous coding | 12% |
| MM18T | CHL1   | cell adhesion molecule with homology to L1CAM (close homolog of L1)                     | CCDS2556.1  | chr3_433354-433354_C_T       | ISV-4>  | Substitution | Splice site acceptor | 10% |
| MM18T | CHM    | choroideremia (Rab escort protein 1)                                                    | CCDS14454.1 | chrX_85218765-85218765_C_T   | 203A>T  | Substitution | Nonsynonymous coding | 11% |
| MM18T | CHP1   | calcineurin-like EF-hand protein 1                                                      | CCDS10073.1 | chr15_41571068-41571068_C_A  | 172S>Y  | Substitution | Nonsynonymous coding | 16% |
| MM18T | CHPF2  | chondroitin polymerizing factor 2                                                       | CCDS34779.1 | chr7_150933630-150933630_G_A | 322S>N  | Substitution | Nonsynonymous coding | 19% |
| MM18T | CHRD   | chordin                                                                                 | CCDS3266.1  | chr3_184102356-184102356_G_A | 491R>Q  | Substitution | Nonsynonymous coding | 11% |
| MM18T | CHRD   | chordin                                                                                 | CCDS3266.1  | chr3_184105800-184105800_G_A | 845D>N  | Substitution | Nonsynonymous coding | 15% |
| MM18T | CHRM4  | cholinergic receptor, muscarinic 4                                                      | CCDS44581.1 | chr11_46407564-46407564_C_T  | 182D>N  | Substitution | Nonsynonymous coding | 14% |
| MM18T | CHRNA2 | cholinergic receptor, nicotinic, alpha 2 (neuronal)                                     | CCDS6059.1  | chr8_27327480-27327480_C_T   | 31R>H   | Substitution | Nonsynonymous coding | 19% |
| MM18T | CHRNA4 | cholinergic receptor, nicotinic, alpha 4 (neuronal)                                     | CCDS13517.1 | chr20_61981147-61981147_G_A  | 539S>L  | Substitution | Nonsynonymous coding | 11% |
| MM18T | CHRNA4 | cholinergic receptor, nicotinic, alpha 4 (neuronal)                                     | CCDS13517.1 | chr20_61981804-61981804_G_A  | 320S>F  | Substitution | Nonsynonymous coding | 17% |
| MM18T | CHRN1  | cholinergic receptor, nicotinic, beta 1 (muscle)                                        | CCDS11106.1 | chr17_7360010-7360010_T_C    | 492Y>H  | Substitution | Nonsynonymous coding | 15% |

|       |        |                                                                        |                 |                               |         |              |                      |     |
|-------|--------|------------------------------------------------------------------------|-----------------|-------------------------------|---------|--------------|----------------------|-----|
| MM18T | CHRN4  | cholinergic receptor, nicotinic, beta 4 (neuronal)                     | CCDS10306.1     | chr15_78922057-78922057_G_A   | 197P>L  | Substitution | Nonsynonymous coding | 10% |
| MM18T | CHRNA  | cholinergic receptor, nicotinic, alpha 1 (muscle)                      | CCDS2494.1      | chr2_233396089-233396089_C_T  | 283S>L  | Substitution | Nonsynonymous coding | 19% |
| MM18T | CHRNE  | cholinergic receptor, nicotinic, epsilon (muscle)                      | CCDS11058.1     | chr17_4805345-4805345_C_T     | 128V>M  | Substitution | Nonsynonymous coding | 20% |
| MM18T | CHST1  | carbohydrate (keratan sulfate Gal-6) sulfotransferase 1                | CCDS7913.1      | chr11_45671485-45671485_C_T   | 330R>H  | Substitution | Nonsynonymous coding | 11% |
| MM18T | CHST13 | carbohydrate (chondroitin 4) sulfotransferase 13                       | CCDS3039.1      | chr3_126255123-126255123_A_G  | 36N>S   | Substitution | Nonsynonymous coding | 13% |
| MM18T | CHST13 | carbohydrate (chondroitin 4) sulfotransferase 13                       | CCDS3039.1      | chr3_126261149-126261149_G_A  | 252A>T  | Substitution | Nonsynonymous coding | 19% |
| MM18T | CHST13 | carbohydrate (chondroitin 4) sulfotransferase 13                       | CCDS3039.1      | chr3_126261165-126261165_G_A  | 257C>Y  | Substitution | Nonsynonymous coding | 20% |
| MM18T | CHST15 | carbohydrate (N-acetylgalactosamine 4-sulfate 6-O) sulfotransferase 15 | ENST00000421115 | chr10_125780753-125780754_GG_ | NA      | Deletion     | Frameshift           | 54% |
| MM18T | CHST15 | carbohydrate (N-acetylgalactosamine 4-sulfate 6-O) sulfotransferase 15 | CCDS7638.1      | chr10_125804180-125804180_C_A | 268D>Y  | Substitution | Nonsynonymous coding | 15% |
| MM18T | CHST15 | carbohydrate (N-acetylgalactosamine 4-sulfate 6-O) sulfotransferase 15 | CCDS7638.1      | chr10_125804255-125804255_C_T | 243A>T  | Substitution | Nonsynonymous coding | 11% |
| MM18T | CHST3  | carbohydrate (chondroitin 6) sulfotransferase 3                        | CCDS7312.1      | chr10_73765715-73765715_G_A   | 39E>K   | Substitution | Nonsynonymous coding | 16% |
| MM18T | CHST7  | carbohydrate (N-acetylglucosamine 6-O) sulfotransferase 7              | CCDS14268.1     | chrX_46433533-46433533_G_A    | 56S>N   | Substitution | Nonsynonymous coding | 20% |
| MM18T | CHST7  | carbohydrate (N-acetylglucosamine 6-O) sulfotransferase 7              | CCDS14268.1     | chrX_46433616-46433616_C_T    | 84R>W   | Substitution | Nonsynonymous coding | 16% |
| MM18T | CHST7  | carbohydrate (N-acetylglucosamine 6-O) sulfotransferase 7              | CCDS14268.1     | chrX_46433974-46433974_C_T    | 203S>L  | Substitution | Nonsynonymous coding | 15% |
| MM18T | CHST7  | carbohydrate (N-acetylglucosamine 6-O) sulfotransferase 7              | CCDS14268.1     | chrX_46434042-46434042_G_A    | 226E>K  | Substitution | Nonsynonymous coding | 21% |
| MM18T | CHST7  | carbohydrate (N-acetylglucosamine 6-O) sulfotransferase 7              | CCDS14268.1     | chrX_46434537-46434537_C_T    | 391R>C  | Substitution | Nonsynonymous coding | 29% |
| MM18T | CILP   | cartilage intermediate layer protein, nucleotide pyrophosphohydrolase  | CCDS10203.1     | chr15_65491108-65491108_G_A   | 506R>C  | Substitution | Nonsynonymous coding | 16% |
| MM18T | CILP2  | cartilage intermediate layer protein 2                                 | CCDS12405.1     | chr19_19656085-19656085_G_A   | 911V>M  | Substitution | Nonsynonymous coding | 22% |
| MM18T | CISD2  | CDGSH iron sulfur domain 2                                             | CCDS34040.1     | chr4_103806577-103806577_G_A  | 103R>H  | Substitution | Nonsynonymous coding | 16% |
| MM18T | CIT    | citron (rho-interacting, serine/threonine kinase 21)                   | CCDS9192.1      | chr12_120138580-120138580_G_T | 1823L>I | Substitution | Nonsynonymous coding | 16% |
| MM18T | CIZ1   | CDKN1A interacting zinc finger protein 1                               | CCDS6894.1      | chr9_130929431-130929431_C_A  | 770D>Y  | Substitution | Nonsynonymous coding | 22% |
| MM18T | CKAP2  | cytoskeleton associated protein 2                                      | CCDS41893.1     | chr13_53049110-53049110_G_A   | 629R>Q  | Substitution | Nonsynonymous coding | 18% |
| MM18T | CKAP2L | cytoskeleton associated protein 2-like                                 | CCDS2100.1      | chr2_113514196-113514196_C_T  | 251S>N  | Substitution | Nonsynonymous coding | 14% |
| MM18T | CKLF   | chemokine-like factor                                                  | CCDS10807.1     | chr16_66592219-66592219_C_T   | 69R>X   | Substitution | Nonsense             | 10% |
| MM18T | CKM    | creatine kinase, muscle                                                | CCDS12659.1     | chr19_45818840-45818840_C_A   | 122D>Y  | Substitution | Nonsynonymous coding | 10% |
| MM18T | CKMT2  | creatine kinase, mitochondrial 2 (sarcomeric)                          | CCDS4053.1      | chr5_80562014-80562014_G_T    | 399K>N  | Substitution | Nonsynonymous coding | 14% |
| MM18T | CLASP2 | cytoplasmic linker associated protein 2                                | NM_015097       | chr3_33661097-33661097_G_A    | 439R>W  | Substitution | Nonsynonymous coding | 15% |
| MM18T | CLASP2 | cytoplasmic linker associated protein 2                                | NM_015097       | chr3_33673825-33673825_C_A    | 301D>Y  | Substitution | Nonsynonymous coding | 11% |
| MM18T | CLCA4  | chloride channel accessory 4                                           | CCDS41355.1     | chr1_87045262-87045262_T_C    | 783V>A  | Substitution | Nonsynonymous coding | 16% |
| MM18T | CLCN1  | chloride channel, voltage-sensitive 1                                  | CCDS5881.1      | chr7_143017793-143017793_A_C  | 113K>T  | Substitution | Nonsynonymous coding | 14% |
| MM18T | CLCNKA | chloride channel, voltage-sensitive Ka                                 | CCDS167.1       | chr1_16359710-16359710_A_G    | 659T>A  | Substitution | Nonsynonymous coding | 24% |
| MM18T | CLDN12 | claudin 12                                                             | CCDS5618.1      | chr7_90042279-90042279_G_A    | 97A>T   | Substitution | Nonsynonymous coding | 15% |

|       |         |                                                           |                 |                               |         |              |                      |     |
|-------|---------|-----------------------------------------------------------|-----------------|-------------------------------|---------|--------------|----------------------|-----|
| MM18T | CLDN14  | claudin 14                                                | CCDS13645.1     | chr21_37833523-37833523_C_A   | 157K>N  | Substitution | Nonsynonymous coding | 14% |
| MM18T | CLDN2   | claudin 2                                                 | CCDS14524.1     | chrX_106172044-106172044_G_A  | 196D>N  | Substitution | Nonsynonymous coding | 15% |
| MM18T | CLDN20  | claudin 20                                                | CCDS5249.1      | chr6_155597477-155597477_G_T  | 208E>D  | Substitution | Nonsynonymous coding | 17% |
| MM18T | CLDN23  | claudin 23                                                | NM_194284       | chr8_8560174-8560174_C_T      | 89A>V   | Substitution | Nonsynonymous coding | 12% |
| MM18T | CLEC14A | C-type lectin domain family 14, member A                  | CCDS9667.1      | chr14_38724960-38724960_G_T   | 90L>M   | Substitution | Nonsynonymous coding | 12% |
| MM18T | CLEC16A | C-type lectin domain family 16, member A                  | CCDS45409.1     | chr16_11097155-11097155_G_T   | 432E>D  | Substitution | Nonsynonymous coding | 13% |
| MM18T | CLEC16A | C-type lectin domain family 16, member A                  | CCDS45409.1     | chr16_11217715-11217715_C_A   | 795F>L  | Substitution | Nonsynonymous coding | 11% |
| MM18T | CLEC16A | C-type lectin domain family 16, member A                  | ENST00000409552 | chr16_11220067-11220067_C_A   | 884S>Y  | Substitution | Nonsynonymous coding | 11% |
| MM18T | CLEC4C  | C-type lectin domain family 4, member C                   | CCDS8583.1      | chr12_7899020-7899020_C_A     | ISV-1>  | Substitution | Splice site acceptor | 14% |
| MM18T | CLEC4F  | C-type lectin domain family 4, member F                   | CCDS1910.1      | chr2_71044012-71044012_C_A    | 167Q>H  | Substitution | Nonsynonymous coding | 13% |
| MM18T | CLEC6A  | C-type lectin domain family 6, member A                   | CCDS31739.1     | chr12_8610527-8610527_C_A     | 22S>Y   | Substitution | Nonsynonymous coding | 10% |
| MM18T | CLINT1  | clathrin interactor 1                                     | CCDS47330.1     | chr5_157240236-157240236_C_A  | ISV-1>  | Substitution | Splice site acceptor | 12% |
| MM18T | CLMN    | calmin (calponin-like, transmembrane)                     | CCDS9933.1      | chr14_95662941-95662941__T    | NA      | Insertion    | Frameshift           | 12% |
| MM18T | CLMN    | calmin (calponin-like, transmembrane)                     | CCDS9933.1      | chr14_95677077-95677077_C_T   | 250A>T  | Substitution | Nonsynonymous coding | 10% |
| MM18T | CLNK    | cytokine-dependent hematopoietic cell linker              | CCDS47024.1     | chr4_10599639-10599639_C_T    | 16D>N   | Substitution | Nonsynonymous coding | 10% |
| MM18T | CLP1    | cleavage and polyadenylation factor I subunit 1           | CCDS7964.1      | chr11_57428691-57428691_C_T   | 354P>L  | Substitution | Nonsynonymous coding | 12% |
| MM18T | CLPTM1  | cleft lip and palate associated transmembrane protein 1   | CCDS12651.1     | chr19_45476432-45476432_G_A   | 92A>T   | Substitution | Nonsynonymous coding | 14% |
| MM18T | CLPTM1  | cleft lip and palate associated transmembrane protein 1   | CCDS12651.1     | chr19_45493762-45493762_G_T   | 414E>D  | Substitution | Nonsynonymous coding | 11% |
| MM18T | CLPX    | ClpX caseinolytic peptidase X homolog (E. coli)           | CCDS10202.1     | chr15_65443238-65443238_C_A   | 609E>X  | Substitution | Nonsense             | 17% |
| MM18T | CLSTN2  | calsyntenin 2                                             | CCDS3112.1      | chr3_140277552-140277552_G_A  | 632E>K  | Substitution | Nonsynonymous coding | 10% |
| MM18T | CLSTN2  | calsyntenin 2                                             | CCDS3112.1      | chr3_140282009-140282009_C_T  | 816H>Y  | Substitution | Nonsynonymous coding | 11% |
| MM18T | CMAS    | cytidine monophosphate N-acetylneuraminic acid synthetase | CCDS8696.1      | chr12_22208210-22208210_C_A   | 130L>I  | Substitution | Nonsynonymous coding | 11% |
| MM18T | CMAS    | cytidine monophosphate N-acetylneuraminic acid synthetase | CCDS8696.1      | chr12_22208520-22208520_C_T   | 179R>X  | Substitution | Nonsense             | 13% |
| MM18T | CMKLR1  | chemokine-like receptor 1                                 | CCDS44965.1     | chr12_108685688-108685688_C_A | 351R>I  | Substitution | Nonsynonymous coding | 19% |
| MM18T | CMKLR1  | chemokine-like receptor 1                                 | CCDS44965.1     | chr12_108686084-108686084_A_G | 219V>A  | Substitution | Nonsynonymous coding | 13% |
| MM18T | CMYA5   | cardiomyopathy associated 5                               | CCDS47238.1     | chr5_79025183-79025183_T_A    | 199S>T  | Substitution | Nonsynonymous coding | 14% |
| MM18T | CMYA5   | cardiomyopathy associated 5                               | CCDS47238.1     | chr5_79025778-79025778_A_G    | 397E>G  | Substitution | Nonsynonymous coding | 11% |
| MM18T | CMYA5   | cardiomyopathy associated 5                               | CCDS47238.1     | chr5_79027071-79027071_C_A    | 828S>Y  | Substitution | Nonsynonymous coding | 11% |
| MM18T | CMYA5   | cardiomyopathy associated 5                               | CCDS47238.1     | chr5_79031127-79031127_C_T    | 2180S>L | Substitution | Nonsynonymous coding | 12% |
| MM18T | CMYA5   | cardiomyopathy associated 5                               | CCDS47238.1     | chr5_79058900-79058900_T_C    | 3808V>A | Substitution | Nonsynonymous coding | 20% |
| MM18T | CMYA5   | cardiomyopathy associated 5                               | CCDS47238.1     | chr5_79089364-79089364_C_T    | 3965S>L | Substitution | Nonsynonymous coding | 11% |
| MM18T | CMYA5   | cardiomyopathy associated 5                               | CCDS47238.1     | chr5_79034384-79034384_C_T    | 3266R>X | Substitution | Nonsense             | 17% |

|       |         |                                                       |                 |                               |         |              |                      |     |
|-------|---------|-------------------------------------------------------|-----------------|-------------------------------|---------|--------------|----------------------|-----|
| MM18T | CMYA5   | cardiomyopathy associated 5                           | CCDS47238.1     | chr5_79084854-79084854_C_A    | 3872Y>X | Substitution | Nonsense             | 14% |
| MM18T | CNDP1   | carnosine dipeptidase 1 (metallopeptidase M20 family) | CCDS12007.1     | chr18_72234554-72234554_G_T   | 214K>N  | Substitution | Nonsynonymous coding | 13% |
| MM18T | CNGB1   | cyclic nucleotide gated channel beta 1                | CCDS42169.1     | chr16_57918159-57918159_G_A   | 1222S>L | Substitution | Nonsynonymous coding | 11% |
| MM18T | CNNM1   | cyclin M1                                             | CCDS7478.2      | chr10_101090060-101090060_C_T | 306P>S  | Substitution | Nonsynonymous coding | 12% |
| MM18T | CNNM2   | cyclin M2                                             | CCDS44474.1     | chr10_104678590-104678590_T_A | 118I>N  | Substitution | Nonsynonymous coding | 12% |
| MM18T | CNNM4   | cyclin M4                                             | CCDS2024.2      | chr2_97428064-97428064_G_A    | 443R>H  | Substitution | Nonsynonymous coding | 14% |
| MM18T | CNOT1   | CCR4-NOT transcription complex, subunit 1             | CCDS10799.1     | chr16_58580330-58580330_T_G   | 1301N>H | Substitution | Nonsynonymous coding | 11% |
| MM18T | CNOT10  | CCR4-NOT transcription complex, subunit 10            | CCDS2655.1      | chr3_32811388-32811388_A_T    | 672M>L  | Substitution | Nonsynonymous coding | 16% |
| MM18T | CNOT2   | CCR4-NOT transcription complex, subunit 2             | CCDS31857.1     | chr12_70704744-70704744_G_A   | 40E>K   | Substitution | Nonsynonymous coding | 13% |
| MM18T | CNOT3   | CCR4-NOT transcription complex, subunit 3             | CCDS12880.1     | chr19_54656246-54656246_C_T   | 596S>L  | Substitution | Nonsynonymous coding | 16% |
| MM18T | CNOT6   | CCR4-NOT transcription complex, subunit 6             | CCDS4455.1      | chr5_179977077-179977077_C_T  | 87R>C   | Substitution | Nonsynonymous coding | 12% |
| MM18T | CNOT6   | CCR4-NOT transcription complex, subunit 6             | CCDS4455.1      | chr5_179996257-179996257_G_A  | 392R>H  | Substitution | Nonsynonymous coding | 13% |
| MM18T | CNPY3   | canopy 3 homolog (zebrafish)                          | CCDS4875.1      | chr6_42903328-42903328_G_A    | 98E>K   | Substitution | Nonsynonymous coding | 11% |
| MM18T | CNTLN   | centlein, centrosomal protein                         | CCDS43789.1     | chr9_17416159-17416159_G_A    | 1029R>Q | Substitution | Nonsynonymous coding | 11% |
| MM18T | CNTLN   | centlein, centrosomal protein                         | CCDS43789.1     | chr9_17394613-17394613_G_T    | 721E>X  | Substitution | Nonsense             | 14% |
| MM18T | CNTN4   | contactin 4                                           | CCDS43041.1     | chr3_2944587-2944587_C_A      | 369L>I  | Substitution | Nonsynonymous coding | 12% |
| MM18T | CNTN6   | contactin 6                                           | CCDS2557.1      | chr3_1269564-1269564_G_A      | 82G>D   | Substitution | Nonsynonymous coding | 18% |
| MM18T | CNTN6   | contactin 6                                           | CCDS2557.1      | chr3_1369165-1369165_A_G      | 370T>A  | Substitution | Nonsynonymous coding | 13% |
| MM18T | CNTN6   | contactin 6                                           | CCDS2557.1      | chr3_1415733-1415733_G_T      | 691E>X  | Substitution | Nonsense             | 13% |
| MM18T | CNTNAP2 | contactin associated protein-like 2                   | CCDS5889.1      | chr7_147815295-147815295_T_G  | 823I>M  | Substitution | Nonsynonymous coding | 11% |
| MM18T | CNTRL   | centriolin                                            | CCDS35118.1     | chr9_123850610-123850610_G_T  | 2K>N    | Substitution | Nonsynonymous coding | 14% |
| MM18T | CNTRL   | centriolin                                            | CCDS35118.1     | chr9_123886298-123886298_G_T  | 580E>D  | Substitution | Nonsynonymous coding | 12% |
| MM18T | COBL    | cordons-bleu WH2 repeat protein                       | CCDS34637.1     | chr7_51097054-51097054_G_A    | 580A>V  | Substitution | Nonsynonymous coding | 12% |
| MM18T | COBLL1  | cordons-bleu WH2 repeat protein-like 1                | CCDS2223.2      | chr2_165552101-165552101_C_A  | 639D>Y  | Substitution | Nonsynonymous coding | 12% |
| MM18T | COBLL1  | cordons-bleu WH2 repeat protein-like 1                | CCDS2223.2      | chr2_165586555-165586555_C_T  | 101D>N  | Substitution | Nonsynonymous coding | 11% |
| MM18T | COBLL1  | cordons-bleu WH2 repeat protein-like 1                | ENST00000444537 | chr2_165636196-165636196_C_T  | 26E>K   | Substitution | Nonsynonymous coding | 12% |
| MM18T | COBLL1  | cordons-bleu WH2 repeat protein-like 1                | CCDS2223.2      | chr2_165551579-165551579_C_A  | 813E>X  | Substitution | Nonsense             | 12% |
| MM18T | COG1    | component of oligomeric golgi complex 1               | CCDS11692.1     | chr17_71202394-71202394_G_A   | 871R>Q  | Substitution | Nonsynonymous coding | 16% |
| MM18T | COG2    | component of oligomeric golgi complex 2               | CCDS1584.1      | chr1_230795366-230795366_A_G  | 77N>D   | Substitution | Nonsynonymous coding | 15% |
| MM18T | COG8    | component of oligomeric golgi complex 8               | CCDS10876.1     | chr16_69373192-69373192_C_A   | 88K>N   | Substitution | Nonsynonymous coding | 11% |
| MM18T | COIL    | coilin                                                | CCDS11592.1     | chr17_55027611-55027611_G_A   | 331S>L  | Substitution | Nonsynonymous coding | 13% |
| MM18T | COL10A1 | collagen, type X, alpha 1                             | CCDS5105.1      | chr6_116442496-116442496_T_G  | 261E>D  | Substitution | Nonsynonymous coding | 17% |

|       |         |                               |             |                               |         |              |                      |     |
|-------|---------|-------------------------------|-------------|-------------------------------|---------|--------------|----------------------|-----|
| MM18T | COL12A1 | collagen, type XII, alpha 1   | CCDS43482.1 | chr6_75823007-75823007_G_T    | 2621F>L | Substitution | Nonsynonymous coding | 13% |
| MM18T | COL12A1 | collagen, type XII, alpha 1   | CCDS43482.1 | chr6_75899527-75899527_G_T    | 133C>X  | Substitution | Nonsense             | 11% |
| MM18T | COL13A1 | collagen, type XIII, alpha 1  | CCDS44419.1 | chr10_71684726-71684726_G_A   | 420R>H  | Substitution | Nonsynonymous coding | 18% |
| MM18T | COL15A1 | collagen, type XV, alpha 1    | CCDS35081.1 | chr9_101749645-101749645_T_C  | 240S>P  | Substitution | Nonsynonymous coding | 15% |
| MM18T | COL17A1 | collagen, type XVII, alpha 1  | CCDS7554.1  | chr10_105830231-105830231_T_G | 187K>T  | Substitution | Nonsynonymous coding | 15% |
| MM18T | COL1A2  | collagen, type I, alpha 2     | CCDS34682.1 | chr7_94044544-94044544_C_A    | 576H>N  | Substitution | Nonsynonymous coding | 11% |
| MM18T | COL1A2  | collagen, type I, alpha 2     | CCDS34682.1 | chr7_94052329-94052329_C_T    | 822R>C  | Substitution | Nonsynonymous coding | 14% |
| MM18T | COL21A1 | collagen, type XXI, alpha 1   | NM_030820   | chr6_56035484-56035484_C_T    | 330G>D  | Substitution | Nonsynonymous coding | 17% |
| MM18T | COL21A1 | collagen, type XXI, alpha 1   | NM_030820   | chr6_56035597-56035597_C_A    | 292K>N  | Substitution | Nonsynonymous coding | 12% |
| MM18T | COL22A1 | collagen, type XXII, alpha 1  | CCDS6376.1  | chr8_139691910-139691910_C_T  | 1008G>R | Substitution | Nonsynonymous coding | 12% |
| MM18T | COL27A1 | collagen, type XXVII, alpha 1 | CCDS6802.1  | chr9_116925015-116925015_T_C  | 28I>T   | Substitution | Nonsynonymous coding | 12% |
| MM18T | COL27A1 | collagen, type XXVII, alpha 1 | CCDS6802.1  | chr9_116925024-116925024_C_T  | 31S>L   | Substitution | Nonsynonymous coding | 15% |
| MM18T | COL27A1 | collagen, type XXVII, alpha 1 | CCDS6802.1  | chr9_116930349-116930349_A_G  | 172T>A  | Substitution | Nonsynonymous coding | 20% |
| MM18T | COL2A1  | collagen, type II, alpha 1    | CCDS41778.1 | chr12_48372175-48372175_C_T   | 968E>K  | Substitution | Nonsynonymous coding | 37% |
| MM18T | COL4A1  | collagen, type IV, alpha 1    | CCDS9511.1  | chr13_110819513-110819513_C_T | 1314G>E | Substitution | Nonsynonymous coding | 15% |
| MM18T | COL4A2  | collagen, type IV, alpha 2    | CCDS41907.1 | chr13_111144438-111144438_C_A | 1159P>H | Substitution | Nonsynonymous coding | 15% |
| MM18T | COL4A4  | collagen, type IV, alpha 4    | CCDS42828.1 | chr2_227896735-227896735_C_T  | 1248G>E | Substitution | Nonsynonymous coding | 14% |
| MM18T | COL4A4  | collagen, type IV, alpha 4    | CCDS42828.1 | chr2_227922281-227922281_C_A  | 807G>C  | Substitution | Nonsynonymous coding | 15% |
| MM18T | COL4A4  | collagen, type IV, alpha 4    | CCDS42828.1 | chr2_227968772-227968772_A_   | NA      | Deletion     | Splice site acceptor | 11% |
| MM18T | COL4A4  | collagen, type IV, alpha 4    | CCDS42828.1 | chr2_227968772-227968772_A_   | NA      | Insertion    | Splice site acceptor | 13% |
| MM18T | COL5A1  | collagen, type V, alpha 1     | CCDS6982.1  | chr9_137671982-137671982_A_C  | 807K>T  | Substitution | Nonsynonymous coding | 20% |
| MM18T | COL5A1  | collagen, type V, alpha 1     | CCDS6982.1  | chr9_137726982-137726982_G_T  | 1768G>C | Substitution | Nonsynonymous coding | 23% |
| MM18T | COL6A2  | collagen, type VI, alpha 2    | CCDS13728.1 | chr21_47545941-47545941_C_T   | 738R>W  | Substitution | Nonsynonymous coding | 15% |
| MM18T | COL6A2  | collagen, type VI, alpha 2    | CCDS13728.1 | chr21_47542446-47542446_G_T   | ISV+1>  | Substitution | Splice site donor    | 12% |
| MM18T | COL6A3  | collagen, type VI, alpha 3    | CCDS33412.1 | chr2_238249704-238249704_C_T  | 2619D>N | Substitution | Nonsynonymous coding | 11% |
| MM18T | COL6A3  | collagen, type VI, alpha 3    | CCDS33412.1 | chr2_238249143-238249143_C_A  | 2806E>X | Substitution | Nonsense             | 11% |
| MM18T | COL6A5  | collagen, type VI, alpha 5    | NM_153264   | chr3_130187974-130187974_G_A  | 2376D>N | Substitution | Nonsynonymous coding | 12% |
| MM18T | COL6A6  | collagen, type VI, alpha 6    | CCDS46911.1 | chr3_130287049-130287049_G_A  | 668D>N  | Substitution | Nonsynonymous coding | 13% |
| MM18T | COL6A6  | collagen, type VI, alpha 6    | CCDS46911.1 | chr3_130380991-130380991_C_T  | 2114A>V | Substitution | Nonsynonymous coding | 15% |
| MM18T | COL7A1  | collagen, type VII, alpha 1   | CCDS2773.1  | chr3_48617744-48617744_G_A    | 1696R>C | Substitution | Nonsynonymous coding | 13% |
| MM18T | COL7A1  | collagen, type VII, alpha 1   | CCDS2773.1  | chr3_48612645-48612645_C_A    | 2071E>X | Substitution | Nonsense             | 11% |
| MM18T | COL8A1  | collagen, type VIII, alpha 1  | CCDS2934.1  | chr3_99514808-99514808_C_T    | 688T>M  | Substitution | Nonsynonymous coding | 17% |

|       |        |                                                                        |             |                              |        |              |                      |     |
|-------|--------|------------------------------------------------------------------------|-------------|------------------------------|--------|--------------|----------------------|-----|
| MM18T | COL8A2 | collagen, type VIII, alpha 2                                           | CCDS403.1   | chr1_36563885-36563885_C_T   | 466G>E | Substitution | Nonsynonymous coding | 13% |
| MM18T | COL9A1 | collagen, type IX, alpha 1                                             | CCDS4971.1  | chr6_70926613-70926613_C_T   | 918G>E | Substitution | Nonsynonymous coding | 10% |
| MM18T | COL9A1 | collagen, type IX, alpha 1                                             | CCDS4971.1  | chr6_70950411-70950411_G_A   | 687A>V | Substitution | Nonsynonymous coding | 12% |
| MM18T | COLQ   | collagen-like tail subunit (single strand of homotrimer) of asymmetric | CCDS33709.1 | chr3_15497483-15497483_C_T   | 373G>D | Substitution | Nonsynonymous coding | 11% |
| MM18T | COLQ   | collagen-like tail subunit (single strand of homotrimer) of asymmetric | CCDS33709.1 | chr3_15512054-15512054_G_A   | 236R>X | Substitution | Nonsense             | 13% |
| MM18T | COMMD2 | COMM domain containing 2                                               | CCDS3145.1  | chr3_149468585-149468585_T_G | 94E>D  | Substitution | Nonsynonymous coding | 14% |
| MM18T | COPG1  | coatamer protein complex, subunit gamma 1                              | CCDS33851.1 | chr3_128985910-128985910_G_T | 504E>D | Substitution | Nonsynonymous coding | 14% |
| MM18T | COPG1  | coatamer protein complex, subunit gamma 1                              | CCDS33851.1 | chr3_128991125-128991125_G_T | 675E>D | Substitution | Nonsynonymous coding | 13% |
| MM18T | COPS2  | COP9 constitutive photomorphogenic homolog subunit 2 (Arabidopsis)     | CCDS45257.1 | chr15_49426155-49426155_G_A  | 296S>L | Substitution | Nonsynonymous coding | 13% |
| MM18T | COQ4   | coenzyme Q4 homolog ( <i>S. cerevisiae</i> )                           | CCDS6898.1  | chr9_131088075-131088075_C_T | 106S>L | Substitution | Nonsynonymous coding | 21% |
| MM18T | CORIN  | corin, serine peptidase                                                | CCDS3477.1  | chr4_47625738-47625738_C_T   | 797R>Q | Substitution | Nonsynonymous coding | 14% |
| MM18T | CORO6  | coronin 6                                                              | CCDS11252.2 | chr17_27943839-27943839_C_A  | 295E>D | Substitution | Nonsynonymous coding | 19% |
| MM18T | CP     | ceruloplasmin (ferroxidase)                                            | CCDS3141.1  | chr3_148930438-148930438_C_A | 65R>I  | Substitution | Nonsynonymous coding | 12% |
| MM18T | CP     | ceruloplasmin (ferroxidase)                                            | CCDS3141.1  | chr3_148901274-148901274_C_A | 802E>X | Substitution | Nonsense             | 13% |
| MM18T | CPEB4  | cytoplasmic polyadenylation element binding protein 4                  | CCDS4390.1  | chr5_173372102-173372102_G_A | 472R>Q | Substitution | Nonsynonymous coding | 19% |
| MM18T | CPEB4  | cytoplasmic polyadenylation element binding protein 4                  | CCDS4390.1  | chr5_173376531-173376531_C_T | 493R>C | Substitution | Nonsynonymous coding | 14% |
| MM18T | CPEP1  | cadherin-like and PC-esterase domain containing 1                      | CCDS34739.1 | chr7_120740021-120740021_G_A | 264R>Q | Substitution | Nonsynonymous coding | 14% |
| MM18T | CPLX3  | complexin 3                                                            | CCDS32294.1 | chr15_75120439-75120439_C_T  | 77R>X  | Substitution | Nonsense             | 14% |
| MM18T | CPN2   | carboxypeptidase N, polypeptide 2                                      | CCDS33920.1 | chr3_194062898-194062898_C_A | 178Q>H | Substitution | Nonsynonymous coding | 18% |
| MM18T | CPNE6  | copine VI (neuronal)                                                   | CCDS9607.1  | chr14_24546832-24546832_C_A  | 523L>M | Substitution | Nonsynonymous coding | 11% |
| MM18T | CPNE7  | copine VII                                                             | CCDS10980.1 | chr16_89661898-89661898_G_A  | 551D>N | Substitution | Nonsynonymous coding | 11% |
| MM18T | CPNE8  | copine VIII                                                            | CCDS8733.1  | chr12_39079384-39079384_A_C  | 393I>M | Substitution | Nonsynonymous coding | 11% |
| MM18T | CPOX   | coproporphyrinogen oxidase                                             | CCDS2932.1  | chr3_98307633-98307633_C_T   | 293A>T | Substitution | Nonsynonymous coding | 14% |
| MM18T | CPS1   | carbamoyl-phosphate synthase 1, mitochondrial                          | CCDS46505.1 | chr2_211447437-211447437_A_C | ISV+4> | Substitution | Splice site donor    | 11% |
| MM18T | CPSF1  | cleavage and polyadenylation specific factor 1, 160kDa                 | CCDS34966.1 | chr8_145634457-145634457_T_C | 29N>S  | Substitution | Nonsynonymous coding | 16% |
| MM18T | CPSF4L | cleavage and polyadenylation specific factor 4-like                    | CCDS45768.1 | chr17_71250105-71250105_T_C  | 123D>G | Substitution | Nonsynonymous coding | 18% |
| MM18T | CPSF6  | cleavage and polyadenylation specific factor 6, 68kDa                  | CCDS8988.1  | chr12_69652451-69652451_T_C  | 259L>P | Substitution | Nonsynonymous coding | 14% |
| MM18T | CPT2   | carnitine palmitoyltransferase 2                                       | CCDS575.1   | chr1_53679035-53679035_T_A   | 582I>K | Substitution | Nonsynonymous coding | 17% |
| MM18T | CR2    | complement component (3d/Epstein Barr virus) receptor 2                | CCDS31007.1 | chr1_207643397-207643397_G_A | 392R>Q | Substitution | Nonsynonymous coding | 15% |
| MM18T | CRABP1 | cellular retinoic acid binding protein 1                               | CCDS10301.1 | chr15_78632810-78632810_G_A  | 14E>K  | Substitution | Nonsynonymous coding | 24% |
| MM18T | CRB1   | crumbs homolog 1 ( <i>Drosophila</i> )                                 | CCDS1390.1  | chr1_197398637-197398637_C_A | 912S>Y | Substitution | Nonsynonymous coding | 15% |
| MM18T | CRB2   | crumbs homolog 2 ( <i>Drosophila</i> )                                 | CCDS6852.2  | chr9_126128316-126128316_G_A | 180R>H | Substitution | Nonsynonymous coding | 13% |

|       |          |                                                           |                |                               |         |              |                      |     |
|-------|----------|-----------------------------------------------------------|----------------|-------------------------------|---------|--------------|----------------------|-----|
| MM18T | CRB2     | crumbs homolog 2 (Drosophila)                             | CCDS6852.2     | chr9_126135634-126135634_G_A  | 942A>T  | Substitution | Nonsynonymous coding | 58% |
| MM18T | CREB3L3  | cAMP responsive element binding protein 3-like 3          | CCDS12121.1    | chr19_4168438-4168438_G_A     | 269D>N  | Substitution | Nonsynonymous coding | 15% |
| MM18T | CRELD1   | cysteine-rich with EGF-like domains 1                     | CCDS2593.1     | chr3_9986171-9986171_G_A      | 391A>T  | Substitution | Nonsynonymous coding | 23% |
| MM18T | CREM     | cAMP responsive element modulator                         | CCDS7180.1     | chr10_35495955-35495955_G_A   | 244R>Q  | Substitution | Nonsynonymous coding | 17% |
| MM18T | CRHBP    | corticotropin releasing hormone binding protein           | CCDS4034.1     | chr5_76249522-76249522_G_T    | ISV+3>  | Substitution | Splice site donor    | 18% |
| MM18T | CRHR1    | corticotropin releasing hormone receptor 1                | CCDS45712.1    | chr17_43893910-43893910_G_A   | 68C>Y   | Substitution | Nonsynonymous coding | 16% |
| MM18T | CRHR1    | corticotropin releasing hormone receptor 1                | CCDS45712.1    | chr17_43907476-43907476_C_T   | 180R>X  | Substitution | Nonsense             | 15% |
| MM18T | CRISP1   | cysteine-rich secretory protein 1                         | CCDS4931.1     | chr6_49819840-49819840_C_A    | 23K>N   | Substitution | Nonsynonymous coding | 13% |
| MM18T | CRISPLD2 | cysteine-rich secretory protein LCCL domain containing 2  | CCDS10949.1    | chr16_84883031-84883031_G_A   | 134E>K  | Substitution | Nonsynonymous coding | 13% |
| MM18T | CRMP1    | collapsin response mediator protein 1                     | CCDS33950.1    | chr4_5894546-5894546_C_T      | 51D>N   | Substitution | Nonsynonymous coding | 13% |
| MM18T | CRNKL1   | crooked neck pre-mRNA splicing factor-like 1 (Drosophila) | CCDS33446.1    | chr20_20029011-20029011_G_A   | 305T>M  | Substitution | Nonsynonymous coding | 17% |
| MM18T | CRX      | cone-rod homeobox                                         | CCDS12706.1    | chr19_48342701-48342701_G_T   | 126R>I  | Substitution | Nonsynonymous coding | 13% |
| MM18T | CRY1     | cryptochrome 1 (photolyase-like)                          | CCDS9112.1     | chr12_107393734-107393734_C_A | 271D>Y  | Substitution | Nonsynonymous coding | 18% |
| MM18T | CRYAA    | crystallin, alpha A                                       | ENST0000398133 | chr21_44589905-44589905_G_T   | 24R>M   | Substitution | Nonsynonymous coding | 18% |
| MM18T | CSDA     | cold shock domain protein A                               | CCDS8630.1     | chr12_10862616-10862616_C_T   | 224R>H  | Substitution | Nonsynonymous coding | 17% |
| MM18T | CSDE1    | cold shock domain containing E1, RNA-binding              | CCDS44197.1    | chr1_115262249-115262249_G_A  | 738L>F  | Substitution | Nonsynonymous coding | 11% |
| MM18T | CSF1     | colony stimulating factor 1 (macrophage)                  | CCDS816.1      | chr1_110460036-110460036_C_A  | 116S>Y  | Substitution | Nonsynonymous coding | 12% |
| MM18T | CSF1     | colony stimulating factor 1 (macrophage)                  | CCDS816.1      | chr1_110466084-110466084_C_T  | 281R>C  | Substitution | Nonsynonymous coding | 20% |
| MM18T | CSF1R    | colony stimulating factor 1 receptor                      | CCDS4302.1     | chr5_149460432-149460432_G_T  | 69L>I   | Substitution | Nonsynonymous coding | 11% |
| MM18T | CSF2     | colony stimulating factor 2 (granulocyte-macrophage)      | CCDS4150.1     | chr5_131409596-131409596_C_T  | 27T>M   | Substitution | Nonsynonymous coding | 16% |
| MM18T | CSK      | c-src tyrosine kinase                                     | CCDS10269.1    | chr15_75094343-75094343_C_A   | 363F>L  | Substitution | Nonsynonymous coding | 14% |
| MM18T | CSMD1    | CUB and Sushi multiple domains 1                          | NM_033225      | chr8_2876008-2876008_G_A      | 2674R>X | Substitution | Nonsense             | 16% |
| MM18T | CSMD2    | CUB and Sushi multiple domains 2                          | CCDS380.1      | chr1_34076668-34076668_G_A    | 2066R>W | Substitution | Nonsynonymous coding | 16% |
| MM18T | CSMD2    | CUB and Sushi multiple domains 2                          | CCDS380.1      | chr1_34312529-34312529_G_A    | 290S>L  | Substitution | Nonsynonymous coding | 12% |
| MM18T | CSMD3    | CUB and Sushi multiple domains 3                          | CCDS6315.1     | chr8_113246700-113246700_T_C  | 3545Y>C | Substitution | Nonsynonymous coding | 12% |
| MM18T | CSMD3    | CUB and Sushi multiple domains 3                          | CCDS6315.1     | chr8_113256722-113256722_T_G  | 3435I>L | Substitution | Nonsynonymous coding | 16% |
| MM18T | CSMD3    | CUB and Sushi multiple domains 3                          | CCDS6315.1     | chr8_113347615-113347615_G_T  | 2370L>I | Substitution | Nonsynonymous coding | 14% |
| MM18T | CSMD3    | CUB and Sushi multiple domains 3                          | CCDS6315.1     | chr8_113349804-113349804_C_T  | 2270R>H | Substitution | Nonsynonymous coding | 11% |
| MM18T | CSMD3    | CUB and Sushi multiple domains 3                          | CCDS6315.1     | chr8_113966924-113966924_T_G  | 470K>T  | Substitution | Nonsynonymous coding | 17% |
| MM18T | CSNK1G1  | casein kinase 1, gamma 1                                  | CCDS10192.2    | chr15_64506230-64506230_C_A   | 180E>X  | Substitution | Nonsense             | 14% |
| MM18T | CSTB     | cystatin B (stefin B)                                     | CCDS13701.1    | chr21_45194622-45194622_C_A   | 29E>X   | Substitution | Nonsense             | 13% |
| MM18T | CSTF2    | cleavage stimulation factor, 3' pre-RNA, subunit 2, 64kDa | CCDS14473.1    | chrX_100077356-100077356_G_T  | 85R>I   | Substitution | Nonsynonymous coding | 15% |

|       |              |                                                                                    |                 |                               |         |              |                      |     |
|-------|--------------|------------------------------------------------------------------------------------|-----------------|-------------------------------|---------|--------------|----------------------|-----|
| MM18T | CTAG2        | cancer/testis antigen 2                                                            | CCDS14759.1     | chrX_153881605-153881605_C_T  | 62R>Q   | Substitution | Nonsynonymous coding | 13% |
| MM18T | CTC1         | CTS telomere maintenance complex component 1                                       | CCDS42259.1     | chr17_8133626-8133626_C_A     | 973E>D  | Substitution | Nonsynonymous coding | 15% |
| MM18T | CTCFL        | CCCTC-binding factor (zinc finger protein)-like                                    | CCDS13459.1     | chr20_56087758-56087758_G_A   | 461R>C  | Substitution | Nonsynonymous coding | 13% |
| MM18T | CTD-2373H9.6 | differential display clone 8 isoform 2<br>[Source:RefSeq peptide;Acc:NP_001230469] | ENST00000322630 | chr17_76888074-76888074_C_A   | 171R>I  | Substitution | Nonsynonymous coding | 12% |
| MM18T | CTDP1        | CTD (carboxy-terminal domain, RNA polymerase II, polypeptide A) phosphatase,       | CCDS12017.1     | chr18_77457894-77457894_G_A   | 176R>Q  | Substitution | Nonsynonymous coding | 11% |
| MM18T | CTDP1        | CTD (carboxy-terminal domain, RNA polymerase II, polypeptide A) phosphatase,       | CCDS12017.1     | chr18_77475021-77475021_G_A   | 521A>T  | Substitution | Nonsynonymous coding | 23% |
| MM18T | CTDP1        | CTD (carboxy-terminal domain, RNA polymerase II, polypeptide A) phosphatase,       | CCDS12017.1     | chr18_77477657-77477657_G_A   | 731D>N  | Substitution | Nonsynonymous coding | 23% |
| MM18T | CTGF         | connective tissue growth factor                                                    | CCDS5151.1      | chr6_132271149-132271149_C_A  | 231E>D  | Substitution | Nonsynonymous coding | 16% |
| MM18T | CTLA4        | cytotoxic T-lymphocyte-associated protein 4                                        | CCDS2362.1      | chr2_204735500-204735500_T_C  | 101S>P  | Substitution | Nonsynonymous coding | 13% |
| MM18T | CTLA4        | cytotoxic T-lymphocyte-associated protein 4                                        | CCDS2362.1      | chr2_204735651-204735651_T_C  | 151V>A  | Substitution | Nonsynonymous coding | 11% |
| MM18T | CTNNA1       | catenin (cadherin-associated protein), alpha 1, 102kDa                             | CCDS34243.1     | chr5_138266584-138266584_G_A  | 753G>E  | Substitution | Nonsynonymous coding | 11% |
| MM18T | CTNNA1       | catenin (cadherin-associated protein), alpha 1, 102kDa                             | CCDS34243.1     | chr5_138240092-138240092_C_T  | 451R>X  | Substitution | Nonsense             | 14% |
| MM18T | CTNS         | cystinosin, lysosomal cystine transporter                                          | CCDS32530.1     | chr17_3552187-3552187_C_T     | 63R>C   | Substitution | Nonsynonymous coding | 16% |
| MM18T | CTR9         | Ctr9, Paf1/RNA polymerase II complex component, homolog (S. cerevisiae)            | CCDS7805.1      | chr11_10793138-10793138_T_G   | 807L>V  | Substitution | Nonsynonymous coding | 11% |
| MM18T | CTSB         | cathepsin B                                                                        | CCDS5986.1      | chr8_11702662-11702662_C_T    | 331R>H  | Substitution | Nonsynonymous coding | 11% |
| MM18T | CTSD         | cathepsin D                                                                        | ENST00000340134 | chr11_1771651-1771651_G_A     | 8P>S    | Substitution | Nonsynonymous coding | 15% |
| MM18T | CTSG         | cathepsin G                                                                        | CCDS9631.1      | chr14_25044502-25044502_A_C   | 58F>V   | Substitution | Nonsynonymous coding | 16% |
| MM18T | CTSL1        | cathepsin L1                                                                       | CCDS6675.1      | chr9_90344647-90344647_G_T    | 261E>X  | Substitution | Nonsense             | 14% |
| MM18T | CTTN         | cortactin                                                                          | CCDS41680.1     | chr11_70260706-70260706_C_T   | 117S>L  | Substitution | Nonsynonymous coding | 14% |
| MM18T | CTTNBP2      | cortactin binding protein 2                                                        | CCDS5774.1      | chr7_117431493-117431493_G_A  | 586S>L  | Substitution | Nonsynonymous coding | 14% |
| MM18T | CTU2         | cytosolic thiouridylase subunit 2 homolog (S. pombe)                               | CCDS45545.1     | chr16_88778732-88778732_G_A   | 132E>K  | Substitution | Nonsynonymous coding | 11% |
| MM18T | CUBN         | cubilin (intrinsic factor-cobalamin receptor)                                      | CCDS7113.1      | chr10_16916392-16916392_C_T   | 3073D>N | Substitution | Nonsynonymous coding | 13% |
| MM18T | CUL3         | cullin 3                                                                           | CCDS2462.1      | chr2_225376182-225376182_C_A  | 258E>X  | Substitution | Nonsense             | 10% |
| MM18T | CUL9         | cullin 9                                                                           | CCDS4890.1      | chr6_43166570-43166570_G_T    | 1009K>N | Substitution | Nonsynonymous coding | 14% |
| MM18T | CUTC         | cutC copper transporter homolog (E. coli)                                          | CCDS7483.1      | chr10_101503026-101503026_C_T | 104R>C  | Substitution | Nonsynonymous coding | 16% |
| MM18T | CUX1         | cut-like homeobox 1                                                                | CCDS5721.1      | chr7_101840109-101840109_C_T  | 473A>V  | Substitution | Nonsynonymous coding | 14% |
| MM18T | CUX2         | cut-like homeobox 2                                                                | CCDS41837.1     | chr12_111729321-111729321_C_T | 134S>L  | Substitution | Nonsynonymous coding | 11% |
| MM18T | CUX2         | cut-like homeobox 2                                                                | CCDS41837.1     | chr12_111744750-111744750_C_T | 295S>L  | Substitution | Nonsynonymous coding | 23% |
| MM18T | CUX2         | cut-like homeobox 2                                                                | CCDS41837.1     | chr12_111748193-111748193_C_T | 536A>V  | Substitution | Nonsynonymous coding | 26% |
| MM18T | CUX2         | cut-like homeobox 2                                                                | CCDS41837.1     | chr12_111749994-111749994_C_T | 664S>L  | Substitution | Nonsynonymous coding | 19% |
| MM18T | CUX2         | cut-like homeobox 2                                                                | CCDS41837.1     | chr12_111772518-111772518_C_T | ISV>4>  | Substitution | Splice site donor    | 16% |
| MM18T | CWF19L2      | CWF19-like 2, cell cycle control (S. pombe)                                        | CCDS8336.2      | chr11_107224389-107224389_C_T | 649R>H  | Substitution | Nonsynonymous coding | 11% |



|       |         |                                                        |                 |                              |         |              |                      |     |
|-------|---------|--------------------------------------------------------|-----------------|------------------------------|---------|--------------|----------------------|-----|
| MM18T | CXCL13  | chemokine (C-X-C motif) ligand 13                      | CCDS3582.1      | chr4_78531766-78531766_A_C   | ISV>2>  | Substitution | Splice site acceptor | 12% |
| MM18T | CXCL17  | chemokine (C-X-C motif) ligand 17                      | CCDS12608.1     | chr19_42937982-42937982_C_A  | 36G>C   | Substitution | Nonsynonymous coding | 16% |
| MM18T | CXCR3   | chemokine (C-X-C motif) receptor 3                     | CCDS48135.1     | chrX_70836736-70836736_C_T   | 243E>K  | Substitution | Nonsynonymous coding | 11% |
| MM18T | CXorf23 | chromosome X open reading frame 23                     | CCDS14194.2     | chrX_19947928-19947928_C_A   | 665R>I  | Substitution | Nonsynonymous coding | 18% |
| MM18T | CXorf30 | chromosome X open reading frame 30                     | NM_001098843    | chrX_36368172-36368172_G_A   | 321E>K  | Substitution | Nonsynonymous coding | 16% |
| MM18T | CXXC11  | CXXC finger protein 11                                 | CCDS42843.1     | chr2_242814122-242814122_G_A | 139A>T  | Substitution | Nonsynonymous coding | 12% |
| MM18T | CXXC5   | CXXC finger protein 5                                  | CCDS43370.1     | chr5_139060959-139060959_G_A | 284R>Q  | Substitution | Nonsynonymous coding | 15% |
| MM18T | CYB5D1  | cytochrome b5 domain containing 1                      | CCDS11123.1     | chr17_7761559-7761559_T_C    | 36V>A   | Substitution | Nonsynonymous coding | 11% |
| MM18T | CYB5D1  | cytochrome b5 domain containing 1                      | CCDS11123.1     | chr17_7762726-7762726_A_C    | 161E>D  | Substitution | Nonsynonymous coding | 17% |
| MM18T | CYBB    | cytochrome b-245, beta polypeptide                     | CCDS14242.1     | chrX_37642819-37642819_G_A   | 73R>Q   | Substitution | Nonsynonymous coding | 11% |
| MM18T | CYFIP1  | cytoplasmic FMR1 interacting protein 1                 | CCDS10009.1     | chr15_22954261-22954261_G_A  | 471V>M  | Substitution | Nonsynonymous coding | 13% |
| MM18T | CYFIP1  | cytoplasmic FMR1 interacting protein 1                 | CCDS10009.1     | chr15_22955212-22955212_G_A  | 536E>K  | Substitution | Nonsynonymous coding | 15% |
| MM18T | CYFIP1  | cytoplasmic FMR1 interacting protein 1                 | CCDS10009.1     | chr15_22955236-22955236_G_A  | 544D>N  | Substitution | Nonsynonymous coding | 19% |
| MM18T | CYFIP2  | cytoplasmic FMR1 interacting protein 2                 | NM_001037332    | chr5_156741403-156741403_G_A | 388E>K  | Substitution | Nonsynonymous coding | 22% |
| MM18T | CYFIP2  | cytoplasmic FMR1 interacting protein 2                 | NM_001037332    | chr5_156788538-156788538_G_A | 991D>N  | Substitution | Nonsynonymous coding | 11% |
| MM18T | CYFIP2  | cytoplasmic FMR1 interacting protein 2                 | NM_001037332    | chr5_156819937-156819937_G_T | 1231D>Y | Substitution | Nonsynonymous coding | 13% |
| MM18T | CYLC2   | cylicin, basic protein of sperm head cytoskeleton 2    | CCDS35085.1     | chr9_105767754-105767754_G_T | 281D>Y  | Substitution | Nonsynonymous coding | 15% |
| MM18T | CYLD    | cylindromatosis (turban tumor syndrome)                | CCDS45482.1     | chr16_50783988-50783988_G_A  | 127V>M  | Substitution | Nonsynonymous coding | 13% |
| MM18T | CYLD    | cylindromatosis (turban tumor syndrome)                | CCDS45482.1     | chr16_50828246-50828246_C_A  | 865L>I  | Substitution | Nonsynonymous coding | 17% |
| MM18T | CYP11A1 | cytochrome P450, family 11, subfamily A, polypeptide 1 | CCDS32291.1     | chr15_74637579-74637579_G_A  | 144S>L  | Substitution | Nonsynonymous coding | 11% |
| MM18T | CYP11B1 | cytochrome P450, family 11, subfamily B, polypeptide 1 | CCDS6392.1      | chr8_143956413-143956413_C_T | 453R>Q  | Substitution | Nonsynonymous coding | 12% |
| MM18T | CYP11B1 | cytochrome P450, family 11, subfamily B, polypeptide 1 | CCDS6392.1      | chr8_143957243-143957243_C_T | 336V>M  | Substitution | Nonsynonymous coding | 18% |
| MM18T | CYP11B1 | cytochrome P450, family 11, subfamily B, polypeptide 1 | ENST00000377675 | chr8_143960834-143960834_C_T | 101R>H  | Substitution | Nonsynonymous coding | 17% |
| MM18T | CYP1A1  | cytochrome P450, family 1, subfamily A, polypeptide 1  | CCDS10268.1     | chr15_75015038-75015038_C_T  | 134R>H  | Substitution | Nonsynonymous coding | 12% |
| MM18T | CYP1A1  | cytochrome P450, family 1, subfamily A, polypeptide 1  | CCDS10268.1     | chr15_75015134-75015134_T_G  | 102D>A  | Substitution | Nonsynonymous coding | 16% |
| MM18T | CYP26A1 | cytochrome P450, family 26, subfamily A, polypeptide 1 | CCDS7426.1      | chr10_94835698-94835698_G_A  | 327R>Q  | Substitution | Nonsynonymous coding | 16% |
| MM18T | CYP26B1 | cytochrome P450, family 26, subfamily B, polypeptide 1 | CCDS1919.1      | chr2_72359652-72359652_C_T   | 415D>N  | Substitution | Nonsynonymous coding | 16% |
| MM18T | CYP26B1 | cytochrome P450, family 26, subfamily B, polypeptide 1 | CCDS1919.1      | chr2_72360280-72360280_C_T   | 340E>K  | Substitution | Nonsynonymous coding | 12% |
| MM18T | CYP2U1  | cytochrome P450, family 2, subfamily U, polypeptide 1  | CCDS34047.1     | chr4_108866627-108866627_A_G | 331N>S  | Substitution | Nonsynonymous coding | 12% |
| MM18T | CYP39A1 | cytochrome P450, family 39, subfamily A, polypeptide 1 | CCDS4916.1      | chr6_46563816-46563816_G_T   | 325L>I  | Substitution | Nonsynonymous coding | 12% |
| MM18T | CYP3A43 | cytochrome P450, family 3, subfamily A, polypeptide 43 | CCDS5675.1      | chr7_99445816-99445816_G_T   | 154D>Y  | Substitution | Nonsynonymous coding | 13% |
| MM18T | CYP3A43 | cytochrome P450, family 3, subfamily A, polypeptide 43 | CCDS5675.1      | chr7_99457471-99457471_T_G   | 295L>R  | Substitution | Nonsynonymous coding | 14% |

|       |          |                                                                |                 |                              |        |              |                      |     |
|-------|----------|----------------------------------------------------------------|-----------------|------------------------------|--------|--------------|----------------------|-----|
| MM18T | CYP4A11  | cytochrome P450, family 4, subfamily A, polypeptide 11         | CCDS543.1       | chr1_47398690-47398690_G_T   | 418L>I | Substitution | Nonsynonymous coding | 13% |
| MM18T | CYP4F2   | cytochrome P450, family 4, subfamily F, polypeptide 2          | CCDS12336.1     | chr19_16003129-16003129_T_G  | 172N>T | Substitution | Nonsynonymous coding | 14% |
| MM18T | CYP4F22  | cytochrome P450, family 4, subfamily F, polypeptide 22         | CCDS12331.1     | chr19_15654966-15654966_G_A  | 338D>N | Substitution | Nonsynonymous coding | 11% |
| MM18T | CYP7A1   | cytochrome P450, family 7, subfamily A, polypeptide 1          | CCDS6171.1      | chr8_59409284-59409284_G_T   | 263L>I | Substitution | Nonsynonymous coding | 14% |
| MM18T | CYP7B1   | cytochrome P450, family 7, subfamily B, polypeptide 1          | CCDS6180.1      | chr8_65537099-65537099_A_G   | ISV-3> | Substitution | Splice site acceptor | 25% |
| MM18T | CYTH3    | cytohesin 3                                                    | CCDS5346.1      | chr7_6210910-6210910_G_A     | 162A>V | Substitution | Nonsynonymous coding | 11% |
| MM18T | CYTL1    | cytokine-like 1                                                | CCDS3379.1      | chr4_5016889-5016889_G_A     | 134R>C | Substitution | Nonsynonymous coding | 18% |
| MM18T | DAAM1    | dishevelled associated activator of morphogenesis 1            | CCDS9737.1      | chr14_59789629-59789629_G_A  | 154D>N | Substitution | Nonsynonymous coding | 15% |
| MM18T | DAAM1    | dishevelled associated activator of morphogenesis 1            | CCDS9737.1      | chr14_59821888-59821888_C_T  | 798R>C | Substitution | Nonsynonymous coding | 13% |
| MM18T | DACH2    | dachshund homolog 2 (Drosophila)                               | CCDS14455.1     | chrX_86068006-86068006_A_C   | 463Q>P | Substitution | Nonsynonymous coding | 12% |
| MM18T | DACT1    | dapper, antagonist of beta-catenin, homolog 1 (Xenopus laevis) | CCDS9736.1      | chr14_59112382-59112382_G_T  | 347Q>H | Substitution | Nonsynonymous coding | 14% |
| MM18T | DACT2    | dapper, antagonist of beta-catenin, homolog 2 (Xenopus laevis) | CCDS47519.1     | chr6_168711081-168711081_G_T | 142S>Y | Substitution | Nonsynonymous coding | 14% |
| MM18T | DAG1     | dystroglycan 1 (dystrophin-associated glycoprotein 1)          | CCDS2799.1      | chr3_49568645-49568645_G_T   | 234R>I | Substitution | Nonsynonymous coding | 12% |
| MM18T | DAG1     | dystroglycan 1 (dystrophin-associated glycoprotein 1)          | CCDS2799.1      | chr3_49568842-49568842_G_A   | 300A>T | Substitution | Nonsynonymous coding | 15% |
| MM18T | DAPK1    | death-associated protein kinase 1                              | CCDS43842.1     | chr9_90266553-90266553_C_T   | 580P>S | Substitution | Nonsynonymous coding | 10% |
| MM18T | DAPK1    | death-associated protein kinase 1                              | CCDS43842.1     | chr9_90283543-90283543_C_T   | 652S>L | Substitution | Nonsynonymous coding | 13% |
| MM18T | DARS2    | aspartyl-tRNA synthetase 2, mitochondrial                      | CCDS1311.1      | chr1_173807345-173807345_G_A | 263R>Q | Substitution | Nonsynonymous coding | 11% |
| MM18T | DARS2    | aspartyl-tRNA synthetase 2, mitochondrial                      | CCDS1311.1      | chr1_173826764-173826764_C_A | 620S>Y | Substitution | Nonsynonymous coding | 11% |
| MM18T | DBC1     | deleted in bladder cancer 1                                    | CCDS6822.1      | chr9_121929829-121929829_G_A | 607R>W | Substitution | Nonsynonymous coding | 12% |
| MM18T | DBR1     | debranching enzyme homolog 1 (S. cerevisiae)                   | CCDS33863.1     | chr3_137893505-137893505_T_C | 45N>D  | Substitution | Nonsynonymous coding | 18% |
| MM18T | DCAF10   | DDB1 and CUL4 associated factor 10                             | CCDS6613.2      | chr9_37854833-37854833_G_A   | 303R>Q | Substitution | Nonsynonymous coding | 13% |
| MM18T | DCAF10   | DDB1 and CUL4 associated factor 10                             | CCDS6613.2      | chr9_37860057-37860057_G_A   | 393R>Q | Substitution | Nonsynonymous coding | 16% |
| MM18T | DCAF12L1 | DDB1 and CUL4 associated factor 12-like 1                      | CCDS14610.1     | chrX_125686087-125686087_C_T | 169E>K | Substitution | Nonsynonymous coding | 17% |
| MM18T | DCAF12L1 | DDB1 and CUL4 associated factor 12-like 1                      | CCDS14610.1     | chrX_125686462-125686462_G_A | 44R>W  | Substitution | Nonsynonymous coding | 15% |
| MM18T | DCAF12L2 | DDB1 and CUL4 associated factor 12-like 2                      | CCDS43991.1     | chrX_125299603-125299603_G_A | 102A>V | Substitution | Nonsynonymous coding | 15% |
| MM18T | DCAF16   | DDB1 and CUL4 associated factor 16                             | CCDS3423.1      | chr4_17805494-17805494_G_A   | 91R>X  | Substitution | Nonsense             | 13% |
| MM18T | DCAF4L2  | DDB1 and CUL4 associated factor 4-like 2                       | CCDS6245.1      | chr8_88885923-88885923_C_T   | 93E>K  | Substitution | Nonsynonymous coding | 12% |
| MM18T | DCAF5    | DDB1 and CUL4 associated factor 5                              | CCDS32106.1     | chr14_69521641-69521641_G_A  | 588R>W | Substitution | Nonsynonymous coding | 12% |
| MM18T | DCAF7    | DDB1 and CUL4 associated factor 7                              | ENST00000310827 | chr17_61662631-61662631_G_A  | 266R>Q | Substitution | Nonsynonymous coding | 20% |
| MM18T | DCAF8L2  | DDB1 and CUL4 associated factor 8-like 2                       | CCDS35222.1     | chrX_27997690-27997690_C_T   | 588E>K | Substitution | Nonsynonymous coding | 11% |
| MM18T | DCAF8L2  | DDB1 and CUL4 associated factor 8-like 2                       | CCDS35222.1     | chrX_27999312-27999312_G_A   | 47S>L  | Substitution | Nonsynonymous coding | 13% |
| MM18T | DCBLD1   | discoidin, CUB and LCC domain containing 1                     | CCDS34522.1     | chr6_117860537-117860537_G_T | 366E>X | Substitution | Nonsense             | 16% |

|       |         |                                                                              |                 |                              |         |              |                      |     |
|-------|---------|------------------------------------------------------------------------------|-----------------|------------------------------|---------|--------------|----------------------|-----|
| MM18T | DCBLD2  | discoidin, CUB and LCCL domain containing 2                                  | CCDS46878.1     | chr3_98518338-98518338_T_C   | 736K>E  | Substitution | Nonsynonymous coding | 14% |
| MM18T | DCC     | deleted in colorectal carcinoma                                              | CCDS11952.1     | chr18_50432645-50432645_G_A  | 215R>Q  | Substitution | Nonsynonymous coding | 15% |
| MM18T | DCDC2   | doublecortin domain containing 2                                             | CCDS4550.1      | chr6_24302058-24302058_C_A   | 148D>Y  | Substitution | Nonsynonymous coding | 13% |
| MM18T | DCHS1   | dachsous 1 (Drosophila)                                                      | CCDS7771.1      | chr11_6648416-6648416_C_T    | 1952D>N | Substitution | Nonsynonymous coding | 15% |
| MM18T | DCHS2   | dachsous 2 (Drosophila)                                                      | CCDS47150.1     | chr4_155411655-155411655_G_A | 285R>C  | Substitution | Nonsynonymous coding | 24% |
| MM18T | DCLK1   | doublecortin-like kinase 1                                                   | CCDS9354.1      | chr13_36384977-36384977_C_A  | 561E>D  | Substitution | Nonsynonymous coding | 13% |
| MM18T | DCLK2   | doublecortin-like kinase 2                                                   | CCDS34076.1     | chr4_151023705-151023705_C_A | 166S>Y  | Substitution | Nonsynonymous coding | 19% |
| MM18T | DCLK3   | doublecortin-like kinase 3                                                   | CCDS43064.1     | chr3_36779166-36779166_G_T   | 329P>T  | Substitution | Nonsynonymous coding | 15% |
| MM18T | DCLRE1B | DNA cross-link repair 1B                                                     | CCDS866.1       | chr1_114450689-114450689_G_T | 138Q>H  | Substitution | Nonsynonymous coding | 12% |
| MM18T | DCLRE1C | DNA cross-link repair 1C                                                     | CCDS31149.1     | chr10_14976724-14976724_C_A  | 172R>I  | Substitution | Nonsynonymous coding | 15% |
| MM18T | DCLRE1C | DNA cross-link repair 1C                                                     | CCDS31149.1     | chr10_14976727-14976727_G_T  | 171P>Q  | Substitution | Nonsynonymous coding | 16% |
| MM18T | DCLRE1C | DNA cross-link repair 1C                                                     | CCDS31149.1     | chr10_14976767-14976767_C_A  | 158D>Y  | Substitution | Nonsynonymous coding | 15% |
| MM18T | DCST1   | DC-STAMP domain containing 1                                                 | CCDS1083.1      | chr1_155006911-155006911_C_T | 21T>M   | Substitution | Nonsynonymous coding | 16% |
| MM18T | DCTN1   | dynactin 1                                                                   | CCDS1939.1      | chr2_74595185-74595185_C_T   | 643R>Q  | Substitution | Nonsynonymous coding | 16% |
| MM18T | DCTN1   | dynactin 1                                                                   | CCDS1939.1      | chr2_74597399-74597399_C_A   | 401E>X  | Substitution | Nonsense             | 13% |
| MM18T | DCTN2   | dynactin 2 (p50)                                                             | CCDS44930.1     | chr12_57939846-57939846_C_T  | 24D>N   | Substitution | Nonsynonymous coding | 16% |
| MM18T | DCUN1D1 | DCN1, defective in cullin neddylation 1, domain containing 1 (S. cerevisiae) | CCDS3240.1      | chr3_182665029-182665029_C_A | 233E>X  | Substitution | Nonsense             | 12% |
| MM18T | DCX     | doublecortin                                                                 | CCDS14556.1     | chrX_110576320-110576320_T_G | 337K>T  | Substitution | Nonsynonymous coding | 11% |
| MM18T | DDB2    | damage-specific DNA binding protein 2, 48kDa                                 | CCDS7927.1      | chr11_47237910-47237910_G_T  | 51D>Y   | Substitution | Nonsynonymous coding | 12% |
| MM18T | DDHD2   | DDHD domain containing 2                                                     | CCDS34883.1     | chr8_38111238-38111238_T_C   | ISV+2>  | Substitution | Splice site donor    | 13% |
| MM18T | DDR2    | discoidin domain receptor tyrosine kinase 2                                  | CCDS1241.1      | chr1_162724480-162724480_G_T | 84K>N   | Substitution | Nonsynonymous coding | 15% |
| MM18T | DDX24   | DEAD (Asp-Glu-Ala-Asp) box polypeptide 24                                    | CCDS9918.1      | chr14_94528683-94528683_C_T  | 335D>N  | Substitution | Nonsynonymous coding | 11% |
| MM18T | DDX26B  | DEAD/H (Asp-Glu-Ala-Asp/His) box polypeptide 26B                             | CCDS35401.1     | chrX_134703332-134703332_A_C | 421K>N  | Substitution | Nonsynonymous coding | 12% |
| MM18T | DDX26B  | DEAD/H (Asp-Glu-Ala-Asp/His) box polypeptide 26B                             | CCDS35401.1     | chrX_134714068-134714068_A_C | 788E>D  | Substitution | Nonsynonymous coding | 16% |
| MM18T | DDX39A  | DEAD (Asp-Glu-Ala-Asp) box polypeptide 39A                                   | CCDS12308.1     | chr19_14521836-14521836_A_G  | 193V>A  | Substitution | Nonsynonymous coding | 11% |
| MM18T | DDX39B  | DEAD (Asp-Glu-Ala-Asp) box polypeptide 39B                                   | ENST00000428450 | chr6_31506674-31506674_C_A   | 128E>X  | Substitution | Nonsense             | 13% |
| MM18T | DDX4    | DEAD (Asp-Glu-Ala-Asp) box polypeptide 4                                     | CCDS3969.1      | chr5_55081649-55081649_G_A   | 272D>N  | Substitution | Nonsynonymous coding | 11% |
| MM18T | DDX42   | DEAD (Asp-Glu-Ala-Asp) box polypeptide 42                                    | CCDS32704.1     | chr17_61887884-61887884_C_T  | 422R>X  | Substitution | Nonsense             | 11% |
| MM18T | DDX46   | DEAD (Asp-Glu-Ala-Asp) box polypeptide 46                                    | CCDS34240.1     | chr5_134154613-134154613_G_A | 965A>T  | Substitution | Nonsynonymous coding | 11% |
| MM18T | DDX49   | DEAD (Asp-Glu-Ala-Asp) box polypeptide 49                                    | CCDS12390.1     | chr19_19035055-19035055_C_A  | 264L>M  | Substitution | Nonsynonymous coding | 14% |
| MM18T | DDX5    | DEAD (Asp-Glu-Ala-Asp) box helicase 5                                        | CCDS11659.1     | chr17_62496205-62496205_C_A  | 561G>C  | Substitution | Nonsynonymous coding | 11% |
| MM18T | DDX52   | DEAD (Asp-Glu-Ala-Asp) box polypeptide 52                                    | CCDS11323.1     | chr17_35986061-35986061_A_G  | 339F>S  | Substitution | Nonsynonymous coding | 13% |

|       |         |                                                |              |                               |         |              |                      |     |
|-------|---------|------------------------------------------------|--------------|-------------------------------|---------|--------------|----------------------|-----|
| MM18T | DDX53   | DEAD (Asp-Glu-Ala-Asp) box polypeptide 53      | CCDS35214.1  | chrX_23019366-23019366_C_T    | 398R>C  | Substitution | Nonsynonymous coding | 11% |
| MM18T | DDX58   | DEAD (Asp-Glu-Ala-Asp) box polypeptide 58      | CCDS6526.1   | chr9_32488749-32488749_T_G    | 312K>N  | Substitution | Nonsynonymous coding | 13% |
| MM18T | DDX60L  | DEAD (Asp-Glu-Ala-Asp) box polypeptide 60-like | CCDS47161.1  | chr4_169312799-169312799__G   | NA      | Insertion    | Splice site acceptor | 11% |
| MM18T | DEFB119 | defensin, beta 119                             | CCDS33455.1  | chr20_29976828-29976828_C_A   | 89*>Y   | Substitution | Nonsynonymous coding | 13% |
| MM18T | DEFB128 | defensin, beta 128                             | CCDS33430.1  | chr20_168687-168687_C_A       | 41R>I   | Substitution | Nonsynonymous coding | 11% |
| MM18T | DENND2A | DENN/MADD domain containing 2A                 | CCDS43659.1  | chr7_140221810-140221810_G_A  | 919T>M  | Substitution | Nonsynonymous coding | 14% |
| MM18T | DENND2C | DENN/MADD domain containing 2C                 | CCDS875.1    | chr1_115168296-115168296_C_T  | 104D>N  | Substitution | Nonsynonymous coding | 18% |
| MM18T | DENND2D | DENN/MADD domain containing 2D                 | CCDS831.1    | chr1_111734779-111734779_C_T  | 319D>N  | Substitution | Nonsynonymous coding | 11% |
| MM18T | DENND3  | DENN/MADD domain containing 3                  | CCDS34947.1  | chr8_142186723-142186723_C_T  | 777R>W  | Substitution | Nonsynonymous coding | 11% |
| MM18T | DENND4B | DENN/MADD domain containing 4B                 | CCDS44228.1  | chr1_153906764-153906764_G_A  | 930R>C  | Substitution | Nonsynonymous coding | 14% |
| MM18T | DENND4C | DENN/MADD domain containing 4C                 | CCDS6491.2   | chr9_19346741-19346741_G_T    | 1040R>I | Substitution | Nonsynonymous coding | 15% |
| MM18T | DENND4C | DENN/MADD domain containing 4C                 | CCDS6491.2   | chr9_19352616-19352616_C_A    | 1293F>L | Substitution | Nonsynonymous coding | 19% |
| MM18T | DENND5B | DENN/MADD domain containing 5B                 | CCDS44857.1  | chr12_31540632-31540632_G_A   | 1244R>C | Substitution | Nonsynonymous coding | 11% |
| MM18T | DENND5B | DENN/MADD domain containing 5B                 | CCDS44857.1  | chr12_31605224-31605224_C_T   | 427D>N  | Substitution | Nonsynonymous coding | 16% |
| MM18T | DEPDC4  | DEP domain containing 4                        | CCDS9075.1   | chr12_100649888-100649888_C_A | 273D>Y  | Substitution | Nonsynonymous coding | 12% |
| MM18T | DEPDC4  | DEP domain containing 4                        | CCDS9075.1   | chr12_100657462-100657462_G_T | 123L>I  | Substitution | Nonsynonymous coding | 12% |
| MM18T | DEPDC7  | DEP domain containing 7                        | CCDS41633.1  | chr11_33038090-33038090_G_T   | 2R>I    | Substitution | Nonsynonymous coding | 12% |
| MM18T | DERA    | deoxyribose-phosphate aldolase (putative)      | CCDS44838.1  | chr12_16189623-16189623_G_T   | ISV-1>  | Substitution | Splice site acceptor | 15% |
| MM18T | DERA    | deoxyribose-phosphate aldolase (putative)      | CCDS44838.1  | chr12_16115830-16115830_G_T   | 153E>X  | Substitution | Nonsense             | 11% |
| MM18T | DFNA5   | deafness, autosomal dominant 5                 | CCDS5389.1   | chr7_24784222-24784222_C_A    | 121Q>H  | Substitution | Nonsynonymous coding | 11% |
| MM18T | DFNB31  | deafness, autosomal recessive 31               | CCDS6806.1   | chr9_117266975-117266975_G_T  | 36S>Y   | Substitution | Nonsynonymous coding | 14% |
| MM18T | DGCR14  | DiGeorge syndrome critical region gene 14      | CCDS13756.1  | chr22_19124935-19124935_C_A   | 312E>D  | Substitution | Nonsynonymous coding | 11% |
| MM18T | DGCR2   | DiGeorge syndrome critical region gene 2       | CCDS33598.1  | chr22_19029473-19029473_C_A   | ISV-1>  | Substitution | Splice site acceptor | 20% |
| MM18T | DGKB    | diacylglycerol kinase, beta 90kDa              | CCDS47547.1  | chr7_14378317-14378317_C_A    | 650D>Y  | Substitution | Nonsynonymous coding | 12% |
| MM18T | DGKB    | diacylglycerol kinase, beta 90kDa              | CCDS47547.1  | chr7_14622749-14622749_G_A    | 484R>C  | Substitution | Nonsynonymous coding | 11% |
| MM18T | DGKB    | diacylglycerol kinase, beta 90kDa              | CCDS47547.1  | chr7_14775809-14775809_A_C    | 60F>C   | Substitution | Nonsynonymous coding | 18% |
| MM18T | DGKB    | diacylglycerol kinase, beta 90kDa              | CCDS47547.1  | chr7_14775813-14775813_C_A    | 59D>Y   | Substitution | Nonsynonymous coding | 11% |
| MM18T | DGKD    | diacylglycerol kinase, delta 130kDa            | CCDS2504.1   | chr2_234344559-234344559_G_T  | 228D>Y  | Substitution | Nonsynonymous coding | 10% |
| MM18T | DGKD    | diacylglycerol kinase, delta 130kDa            | CCDS2504.1   | chr2_234375731-234375731_G_T  | ISV-1>  | Substitution | Splice site acceptor | 14% |
| MM18T | DGKG    | diacylglycerol kinase, gamma 90kDa             | CCDS3274.1   | chr3_185986694-185986694_C_T  | 338A>T  | Substitution | Nonsynonymous coding | 16% |
| MM18T | DGKH    | diacylglycerol kinase, eta                     | CCDS9381.1   | chr13_42742930-42742930_G_A   | 448R>Q  | Substitution | Nonsynonymous coding | 14% |
| MM18T | DGKK    | diacylglycerol kinase, kappa                   | NM_001013742 | chrX_50121631-50121631_G_T    | 974S>Y  | Substitution | Nonsynonymous coding | 12% |

|       |                |                                                                                     |             |                               |         |              |                      |     |
|-------|----------------|-------------------------------------------------------------------------------------|-------------|-------------------------------|---------|--------------|----------------------|-----|
| MM18T | DHCR24         | 24-dehydrocholesterol reductase                                                     | CCDS600.1   | chr1_55349370-55349370_C_T    | 103R>H  | Substitution | Nonsynonymous coding | 10% |
| MM18T | DHH            | desert hedgehog                                                                     | CCDS8779.1  | chr12_49483706-49483706_T_G   | 376Q>P  | Substitution | Nonsynonymous coding | 19% |
| MM18T | DHX16          | DEAH (Asp-Glu-Ala-His) box polypeptide 16                                           | CCDS4685.1  | chr6_30623055-30623055_G_A    | 907S>L  | Substitution | Nonsynonymous coding | 11% |
| MM18T | DHX30          | DEAH (Asp-Glu-Ala-His) box polypeptide 30                                           | CCDS2759.1  | chr3_47882451-47882451_G_A    | 151D>N  | Substitution | Nonsynonymous coding | 15% |
| MM18T | DHX32          | DEAH (Asp-Glu-Ala-His) box polypeptide 32                                           | CCDS7652.1  | chr10_127541012-127541012_A_T | 401F>I  | Substitution | Nonsynonymous coding | 10% |
| MM18T | DHX34          | DEAH (Asp-Glu-Ala-His) box polypeptide 34                                           | CCDS12700.1 | chr19_47878751-47878751_C_A   | 698A>D  | Substitution | Nonsynonymous coding | 11% |
| MM18T | DHX37          | DEAH (Asp-Glu-Ala-His) box polypeptide 37                                           | CCDS9261.1  | chr12_125449145-125449145_G_A | 614R>W  | Substitution | Nonsynonymous coding | 14% |
| MM18T | DIAPH1         | diaphanous homolog 1 (Drosophila)                                                   | CCDS43374.1 | chr5_140905944-140905944_C_T  | 1120E>K | Substitution | Nonsynonymous coding | 12% |
| MM18T | DIAPH3         | diaphanous homolog 3 (Drosophila)                                                   | CCDS41898.1 | chr13_60413502-60413502_G_T   | 940P>T  | Substitution | Nonsynonymous coding | 10% |
| MM18T | DIAPH3         | diaphanous homolog 3 (Drosophila)                                                   | CCDS41898.1 | chr13_60616953-60616953_C_A   | 166G>V  | Substitution | Nonsynonymous coding | 10% |
| MM18T | DIAPH3         | diaphanous homolog 3 (Drosophila)                                                   | CCDS41898.1 | chr13_60707125-60707125_T_C   | ISV-2>  | Substitution | Splice site acceptor | 12% |
| MM18T | DIAPH3         | diaphanous homolog 3 (Drosophila)                                                   | CCDS41898.1 | chr13_60566618-60566618_C_A   | 372E>X  | Substitution | Nonsense             | 18% |
| MM18T | DIDO1          | death inducer-obliterator 1                                                         | CCDS33506.1 | chr20_61512743-61512743_G_T   | 1522S>Y | Substitution | Nonsynonymous coding | 15% |
| MM18T | DIDO1          | death inducer-obliterator 1                                                         | CCDS33506.1 | chr20_61527623-61527623_G_A   | 726R>C  | Substitution | Nonsynonymous coding | 10% |
| MM18T | DIP2A          | DIP2 disco-interacting protein 2 homolog A (Drosophila)                             | CCDS46655.1 | chr21_47966882-47966882_C_T   | 817R>C  | Substitution | Nonsynonymous coding | 18% |
| MM18T | DIP2A          | DIP2 disco-interacting protein 2 homolog A (Drosophila)                             | CCDS46655.1 | chr21_47978203-47978203_C_T   | 1289A>V | Substitution | Nonsynonymous coding | 11% |
| MM18T | DIP2A          | DIP2 disco-interacting protein 2 homolog A (Drosophila)                             | CCDS46655.1 | chr21_47985684-47985684_C_T   | 1408A>V | Substitution | Nonsynonymous coding | 10% |
| MM18T | DIP2A          | DIP2 disco-interacting protein 2 homolog A (Drosophila)                             | CCDS46655.1 | chr21_47918494-47918494_G_A   | ISV-1>  | Substitution | Splice site acceptor | 14% |
| MM18T | DIP2C          | DIP2 disco-interacting protein 2 homolog C (Drosophila)                             | CCDS7054.1  | chr10_332288-332288_C_A       | ISV-1>  | Substitution | Splice site acceptor | 12% |
| MM18T | DIRC2          | disrupted in renal carcinoma 2                                                      | CCDS3018.1  | chr3_122591423-122591423_T_G  | 434F>V  | Substitution | Nonsynonymous coding | 17% |
| MM18T | DISP1          | dispatched homolog 1 (Drosophila)                                                   | CCDS1536.1  | chr1_223168318-223168318_T_G  | 327N>K  | Substitution | Nonsynonymous coding | 11% |
| MM18T | DISP1          | dispatched homolog 1 (Drosophila)                                                   | CCDS1536.1  | chr1_223176042-223176042_G_T  | 435D>Y  | Substitution | Nonsynonymous coding | 11% |
| MM18T | DISP1          | dispatched homolog 1 (Drosophila)                                                   | CCDS1536.1  | chr1_223178788-223178788_C_T  | 1350S>F | Substitution | Nonsynonymous coding | 10% |
| MM18T | DISP2          | dispatched homolog 2 (Drosophila)                                                   | CCDS10056.1 | chr15_40661827-40661827_C_T   | 1172R>W | Substitution | Nonsynonymous coding | 17% |
| MM18T | DISP2          | dispatched homolog 2 (Drosophila)                                                   | CCDS10056.1 | chr15_40662289-40662289_C_T   | 1326P>S | Substitution | Nonsynonymous coding | 13% |
| MM18T | DKFZP686J19100 | Polycystic kidney disease protein 1-like 2 [Source:UniProtKB/Swiss-Prot;Acc:Q7Z442] | NM_052892   | chr16_81161372-81161372_G_A   | 2115R>C | Substitution | Nonsynonymous coding | 25% |
| MM18T | DKFZP686J19100 | Polycystic kidney disease protein 1-like 2 [Source:UniProtKB/Swiss-Prot;Acc:Q7Z442] | NM_052892   | chr16_81134865-81134865_C_A   | 2414*>Y | Substitution | Nonsynonymous coding | 16% |
| MM18T | DKK1           | dickkopf 1 homolog (Xenopus laevis)                                                 | CCDS7246.1  | chr10_54074746-54074746_G_A   | 103G>R  | Substitution | Nonsynonymous coding | 16% |
| MM18T | DKK2           | dickkopf 2 homolog (Xenopus laevis)                                                 | CCDS3675.1  | chr4_107845788-107845788_C_A  | 148R>I  | Substitution | Nonsynonymous coding | 19% |
| MM18T | DKKL1          | dickkopf-like 1                                                                     | CCDS12762.1 | chr19_49868844-49868846_GAG_  | 88E>    | Deletion     | In-frame deletion    | 13% |
| MM18T | DLC1           | deleted in liver cancer 1                                                           | CCDS5989.1  | chr8_12946138-12946138_G_A    | 1384R>C | Substitution | Nonsynonymous coding | 12% |
| MM18T | DLG1           | discs, large homolog 1 (Drosophila)                                                 | CCDS3327.1  | chr3_196771520-196771520_A_C  | 919W>G  | Substitution | Nonsynonymous coding | 16% |

|       |        |                                                        |                 |                               |         |              |                      |     |
|-------|--------|--------------------------------------------------------|-----------------|-------------------------------|---------|--------------|----------------------|-----|
| MM18T | DLG4   | discs, large homolog 4 (Drosophila)                    | CCDS45599.1     | chr17_7099639-7099639_C_T     | 444E>K  | Substitution | Nonsynonymous coding | 15% |
| MM18T | DLG4   | discs, large homolog 4 (Drosophila)                    | CCDS45599.1     | chr17_7106875-7106875_C_T     | 168V>M  | Substitution | Nonsynonymous coding | 15% |
| MM18T | DLGAP1 | discs, large (Drosophila) homolog-associated protein 1 | CCDS11836.1     | chr18_3879146-3879146_G_A     | 308S>L  | Substitution | Nonsynonymous coding | 15% |
| MM18T | DLGAP2 | discs, large (Drosophila) homolog-associated protein 2 | CCDS47760.1     | chr8_1497038-1497038_C_T      | 60S>L   | Substitution | Nonsynonymous coding | 11% |
| MM18T | DLGAP2 | discs, large (Drosophila) homolog-associated protein 2 | CCDS47760.1     | chr8_1639758-1639758_T_G      | 841F>C  | Substitution | Nonsynonymous coding | 11% |
| MM18T | DLGAP4 | discs, large (Drosophila) homolog-associated protein 4 | CCDS13274.1     | chr20_35060148-35060148_C_T   | 10R>C   | Substitution | Nonsynonymous coding | 12% |
| MM18T | DLK1   | delta-like 1 homolog (Drosophila)                      | CCDS9963.1      | chr14_101198519-101198519_G_A | 135G>S  | Substitution | Nonsynonymous coding | 13% |
| MM18T | DLK1   | delta-like 1 homolog (Drosophila)                      | CCDS9963.1      | chr14_101200685-101200685_G_A | 202D>N  | Substitution | Nonsynonymous coding | 16% |
| MM18T | DLX3   | distal-less homeobox 3                                 | CCDS11556.1     | chr17_48072208-48072208_G_A   | 52S>L   | Substitution | Nonsynonymous coding | 14% |
| MM18T | DLX4   | distal-less homeobox 4                                 | CCDS11555.1     | chr17_48051291-48051291_C_T   | 236S>L  | Substitution | Nonsynonymous coding | 20% |
| MM18T | DMAP1  | DNA methyltransferase 1 associated protein 1           | CCDS509.1       | chr1_44685812-44685812_G_A    | 392R>Q  | Substitution | Nonsynonymous coding | 15% |
| MM18T | DMBX1  | diencephalon/mesencephalon homeobox 1                  | CCDS536.1       | chr1_46976298-46976298_G_A    | 102C>Y  | Substitution | Nonsynonymous coding | 15% |
| MM18T | DMD    | dystrophin                                             | CCDS14233.1     | chrX_31152297-31152297_G_T    | 3646L>I | Substitution | Nonsynonymous coding | 12% |
| MM18T | DMD    | dystrophin                                             | CCDS14233.1     | chrX_31496405-31496405_T_C    | 2919N>D | Substitution | Nonsynonymous coding | 13% |
| MM18T | DMD    | dystrophin                                             | CCDS14233.1     | chrX_31792260-31792260_T_A    | 2453E>D | Substitution | Nonsynonymous coding | 11% |
| MM18T | DMPK   | dystrophia myotonica-protein kinase                    | CCDS46119.1     | chr19_46281413-46281413_G_T   | 226S>Y  | Substitution | Nonsynonymous coding | 16% |
| MM18T | DMRT2  | doublesex and mab-3 related transcription factor 2     | CCDS6444.1      | chr9_1056340-1056340_G_T      | 251E>D  | Substitution | Nonsynonymous coding | 12% |
| MM18T | DMRT2  | doublesex and mab-3 related transcription factor 2     | CCDS6444.1      | chr9_1056438-1056438_A_C      | 284K>T  | Substitution | Nonsynonymous coding | 10% |
| MM18T | DMRT3  | doublesex and mab-3 related transcription factor 3     | CCDS6443.1      | chr9_990886-990886_C_T        | 434R>W  | Substitution | Nonsynonymous coding | 18% |
| MM18T | DMRTA1 | DMRT-like family A1                                    | CCDS6514.1      | chr9_22451326-22451326_G_T    | 311D>Y  | Substitution | Nonsynonymous coding | 14% |
| MM18T | DMRTC2 | DMRT-like family C2                                    | CCDS33034.1     | chr19_42354684-42354684_G_T   | 303D>Y  | Substitution | Nonsynonymous coding | 17% |
| MM18T | DMTF1  | cyclin D binding myb-like transcription factor 1       | CCDS5601.1      | chr7_86815288-86815288_C_T    | 398S>L  | Substitution | Nonsynonymous coding | 21% |
| MM18T | DMTF1  | cyclin D binding myb-like transcription factor 1       | CCDS5601.1      | chr7_86817567-86817567_C_A    | 454S>Y  | Substitution | Nonsynonymous coding | 12% |
| MM18T | DMXL1  | Dmx-like 1                                             | CCDS4125.1      | chr5_118480270-118480270_G_T  | 836D>Y  | Substitution | Nonsynonymous coding | 12% |
| MM18T | DMXL1  | Dmx-like 1                                             | CCDS4125.1      | chr5_118539077-118539077_A_C  | 2603E>D | Substitution | Nonsynonymous coding | 11% |
| MM18T | DMXL1  | Dmx-like 1                                             | CCDS4125.1      | chr5_118556663-118556663_C_T  | 2701R>C | Substitution | Nonsynonymous coding | 19% |
| MM18T | DMXL2  | Dmx-like 2                                             | CCDS10141.1     | chr15_51829727-51829727_C_A   | 525K>N  | Substitution | Nonsynonymous coding | 14% |
| MM18T | DNAF3  | dynein, axonemal, assembly factor 3                    | CCDS12918.2     | chr19_55673184-55673184_G_A   | 211R>W  | Substitution | Nonsynonymous coding | 19% |
| MM18T | DNAH1  | dynein, axonemal, heavy chain 1                        | CCDS46842.1     | chr3_52356737-52356737_G_T    | 93K>N   | Substitution | Nonsynonymous coding | 15% |
| MM18T | DNAH10 | dynein, axonemal, heavy chain 10                       | CCDS9255.2      | chr12_124335567-124335567_G_A | 1961D>N | Substitution | Nonsynonymous coding | 15% |
| MM18T | DNAH11 | dynein, axonemal, heavy chain 11                       | ENST00000328843 | chr7_21609776-21609776_G_T    | 428K>N  | Substitution | Nonsynonymous coding | 11% |
| MM18T | DNAH11 | dynein, axonemal, heavy chain 11                       | ENST00000328843 | chr7_21698562-21698562_A_T    | 1752Q>H | Substitution | Nonsynonymous coding | 13% |

|       |        |                                  |                 |                              |         |              |                      |     |
|-------|--------|----------------------------------|-----------------|------------------------------|---------|--------------|----------------------|-----|
| MM18T | DNAH11 | dynein, axonemal, heavy chain 11 | ENST00000328843 | chr7_21723464-21723464_G_T   | 1848Q>H | Substitution | Nonsynonymous coding | 12% |
| MM18T | DNAH11 | dynein, axonemal, heavy chain 11 | ENST00000421290 | chr7_21891213-21891213_G_T   | 11*>Y   | Substitution | Nonsynonymous coding | 12% |
| MM18T | DNAH17 | dynein, axonemal, heavy chain 17 | NM_173628       | chr17_76420030-76420030_G_A  | 4449A>V | Substitution | Nonsynonymous coding | 12% |
| MM18T | DNAH17 | dynein, axonemal, heavy chain 17 | NM_173628       | chr17_76481746-76481746_C_T  | 2457A>T | Substitution | Nonsynonymous coding | 10% |
| MM18T | DNAH17 | dynein, axonemal, heavy chain 17 | NM_173628       | chr17_76490137-76490137_G_A  | 2130A>V | Substitution | Nonsynonymous coding | 15% |
| MM18T | DNAH17 | dynein, axonemal, heavy chain 17 | NM_173628       | chr17_76510888-76510888_G_A  | 1361R>C | Substitution | Nonsynonymous coding | 17% |
| MM18T | DNAH17 | dynein, axonemal, heavy chain 17 | NM_173628       | chr17_76510907-76510907_C_A  | 1354Q>H | Substitution | Nonsynonymous coding | 17% |
| MM18T | DNAH17 | dynein, axonemal, heavy chain 17 | NM_173628       | chr17_76487521-76487521_G_A  | ISV+4>  | Substitution | Splice site donor    | 16% |
| MM18T | DNAH17 | dynein, axonemal, heavy chain 17 | NM_173628       | chr17_76503356-76503356_G_A  | ISV+4>  | Substitution | Splice site donor    | 11% |
| MM18T | DNAH2  | dynein, axonemal, heavy chain 2  | CCDS32551.1     | chr17_7636410-7636410_G_T    | 135Q>H  | Substitution | Nonsynonymous coding | 12% |
| MM18T | DNAH2  | dynein, axonemal, heavy chain 2  | CCDS32551.1     | chr17_7661865-7661865_C_T    | 702R>W  | Substitution | Nonsynonymous coding | 12% |
| MM18T | DNAH2  | dynein, axonemal, heavy chain 2  | CCDS32551.1     | chr17_7727447-7727447_G_T    | 3829E>D | Substitution | Nonsynonymous coding | 15% |
| MM18T | DNAH2  | dynein, axonemal, heavy chain 2  | CCDS32551.1     | chr17_7684487-7684487_T_C    | ISV+2>  | Substitution | Splice site donor    | 20% |
| MM18T | DNAH3  | dynein, axonemal, heavy chain 3  | CCDS10594.1     | chr16_20959824-20959824_G_T  | 3775P>H | Substitution | Nonsynonymous coding | 16% |
| MM18T | DNAH3  | dynein, axonemal, heavy chain 3  | CCDS10594.1     | chr16_21073838-21073838_G_A  | 1229P>S | Substitution | Nonsynonymous coding | 13% |
| MM18T | DNAH3  | dynein, axonemal, heavy chain 3  | CCDS10594.1     | chr16_21128561-21128561_A_C  | 593F>V  | Substitution | Nonsynonymous coding | 15% |
| MM18T | DNAH5  | dynein, axonemal, heavy chain 5  | CCDS3882.1      | chr5_13721311-13721311_T_C   | 4026E>G | Substitution | Nonsynonymous coding | 13% |
| MM18T | DNAH5  | dynein, axonemal, heavy chain 5  | CCDS3882.1      | chr5_13777399-13777399_C_T   | 3006G>D | Substitution | Nonsynonymous coding | 10% |
| MM18T | DNAH5  | dynein, axonemal, heavy chain 5  | CCDS3882.1      | chr5_13850873-13850873_G_A   | 1668R>W | Substitution | Nonsynonymous coding | 15% |
| MM18T | DNAH5  | dynein, axonemal, heavy chain 5  | CCDS3882.1      | chr5_13864512-13864512_T_G   | 1530E>D | Substitution | Nonsynonymous coding | 14% |
| MM18T | DNAH6  | dynein, axonemal, heavy chain 6  | CCDS46348.1     | chr2_84816069-84816069_G_T   | 867K>N  | Substitution | Nonsynonymous coding | 12% |
| MM18T | DNAH6  | dynein, axonemal, heavy chain 6  | CCDS46348.1     | chr2_84851722-84851722_G_T   | 1444R>I | Substitution | Nonsynonymous coding | 13% |
| MM18T | DNAH6  | dynein, axonemal, heavy chain 6  | CCDS46348.1     | chr2_84896557-84896557_C_T   | 2077R>C | Substitution | Nonsynonymous coding | 11% |
| MM18T | DNAH6  | dynein, axonemal, heavy chain 6  | CCDS46348.1     | chr2_84940333-84940333_T_G   | 3165F>V | Substitution | Nonsynonymous coding | 15% |
| MM18T | DNAH6  | dynein, axonemal, heavy chain 6  | CCDS46348.1     | chr2_85035560-85035560_C_A   | 3878A>D | Substitution | Nonsynonymous coding | 13% |
| MM18T | DNAH7  | dynein, axonemal, heavy chain 7  | CCDS42794.1     | chr2_196740521-196740521_C_A | 2055G>V | Substitution | Nonsynonymous coding | 13% |
| MM18T | DNAH7  | dynein, axonemal, heavy chain 7  | CCDS42794.1     | chr2_196788366-196788366_C_T | 1260D>N | Substitution | Nonsynonymous coding | 12% |
| MM18T | DNAH7  | dynein, axonemal, heavy chain 7  | CCDS42794.1     | chr2_196825080-196825080_G_A | 932S>L  | Substitution | Nonsynonymous coding | 13% |
| MM18T | DNAH7  | dynein, axonemal, heavy chain 7  | CCDS42794.1     | chr2_196762492-196762493_AA_ | NA      | Deletion     | Splice site acceptor | 13% |
| MM18T | DNAH9  | dynein, axonemal, heavy chain 9  | CCDS11160.1     | chr17_11535919-11535919_G_A  | 512V>I  | Substitution | Nonsynonymous coding | 12% |
| MM18T | DNAH9  | dynein, axonemal, heavy chain 9  | CCDS11160.1     | chr17_11645619-11645619_C_A  | 2034L>I | Substitution | Nonsynonymous coding | 24% |
| MM18T | DNAH9  | dynein, axonemal, heavy chain 9  | CCDS11160.1     | chr17_11672629-11672629_C_T  | 2512T>M | Substitution | Nonsynonymous coding | 13% |

|       |          |                                                              |                 |                               |         |              |                      |     |
|-------|----------|--------------------------------------------------------------|-----------------|-------------------------------|---------|--------------|----------------------|-----|
| MM18T | DNAH9    | dynein, axonemal, heavy chain 9                              | CCDS11160.1     | chr17_11711182-11711182_C_T   | 2852R>C | Substitution | Nonsynonymous coding | 12% |
| MM18T | DNAH9    | dynein, axonemal, heavy chain 9                              | CCDS11160.1     | chr17_11725330-11725330_G_A   | 2934R>K | Substitution | Nonsynonymous coding | 10% |
| MM18T | DNAH9    | dynein, axonemal, heavy chain 9                              | CCDS11160.1     | chr17_11757402-11757402_C_T   | 3197A>V | Substitution | Nonsynonymous coding | 11% |
| MM18T | DNAH9    | dynein, axonemal, heavy chain 9                              | CCDS11160.1     | chr17_11784656-11784656_A_G   | 3578T>A | Substitution | Nonsynonymous coding | 15% |
| MM18T | DNAI1    | dynein, axonemal, intermediate chain 1                       | CCDS6557.1      | chr9_34490022-34490022_C_T    | 134S>F  | Substitution | Nonsynonymous coding | 15% |
| MM18T | DNAJB11  | DnaJ (Hsp40) homolog, subfamily B, member 11                 | CCDS3277.1      | chr3_186300546-186300546_C_T  | 242R>X  | Substitution | Nonsense             | 10% |
| MM18T | DNAJB3   | DnaJ (Hsp40) homolog, subfamily B, member 3                  | NM_001001394    | chr2_234652376-234652376_C_T  | 63D>N   | Substitution | Nonsynonymous coding | 20% |
| MM18T | DNAJB5   | DnaJ (Hsp40) homolog, subfamily B, member 5                  | CCDS47959.1     | chr9_34993331-34993331_A_G    | 106D>G  | Substitution | Nonsynonymous coding | 11% |
| MM18T | DNAJB6   | DnaJ (Hsp40) homolog, subfamily B, member 6                  | CCDS5946.1      | chr7_157155893-157155893_A_C  | 35N>T   | Substitution | Nonsynonymous coding | 15% |
| MM18T | DNAJB7   | DnaJ (Hsp40) homolog, subfamily B, member 7                  | CCDS14008.1     | chr22_41257117-41257117_T_G   | 294K>N  | Substitution | Nonsynonymous coding | 15% |
| MM18T | DNAJC18  | DnaJ (Hsp40) homolog, subfamily C, member 18                 | CCDS4214.1      | chr5_138761999-138761999_G_A  | 141R>C  | Substitution | Nonsynonymous coding | 19% |
| MM18T | DNAJC25  | DnaJ (Hsp40) homolog, subfamily C, member 25                 | CCDS43862.1     | chr9_114393967-114393967_C_A  | 94P>T   | Substitution | Nonsynonymous coding | 11% |
| MM18T | DNAJC25  | DnaJ (Hsp40) homolog, subfamily C, member 25                 | CCDS43862.1     | chr9_114409529-114409529_C_T  | 160S>L  | Substitution | Nonsynonymous coding | 21% |
| MM18T | DNAJC5B  | DnaJ (Hsp40) homolog, subfamily C, member 5 beta             | CCDS6183.1      | chr8_67012258-67012258_G_T    | 198D>Y  | Substitution | Nonsynonymous coding | 11% |
| MM18T | DNAJC6   | DnaJ (Hsp40) homolog, subfamily C, member 6                  | CCDS30739.1     | chr1_65858525-65858525_C_A    | 570S>Y  | Substitution | Nonsynonymous coding | 26% |
| MM18T | DNAL1    | dynein, axonemal, light chain 1                              | CCDS45134.1     | chr14_74121571-74121571_G_T   | 9E>X    | Substitution | Nonsense             | 18% |
| MM18T | DNASE1L2 | deoxyribonuclease I-like 2                                   | CCDS42105.1     | chr16_2287545-2287545_G_T     | 162Q>H  | Substitution | Nonsynonymous coding | 23% |
| MM18T | DNHD1    | dynein heavy chain domain 1                                  | CCDS44532.1     | chr11_6592501-6592501_C_T     | 4587R>C | Substitution | Nonsynonymous coding | 10% |
| MM18T | DNMBP    | dynamitin binding protein                                    | CCDS7485.1      | chr10_101715261-101715261_G_A | 657A>V  | Substitution | Nonsynonymous coding | 14% |
| MM18T | DNMT3B   | DNA (cytosine-5-)-methyltransferase 3 beta                   | CCDS13205.1     | chr20_31387090-31387090_G_A   | 572R>K  | Substitution | Nonsynonymous coding | 12% |
| MM18T | DNP1     | 2'-deoxynucleoside 5'-phosphate N-hydrolase 1                | CCDS4891.1      | chr6_43193530-43193530_G_A    | 156R>X  | Substitution | Nonsense             | 15% |
| MM18T | DNTTIP2  | deoxynucleotidyltransferase, terminal, interacting protein 2 | CCDS44174.1     | chr1_94343228-94343228_G_T    | 88S>Y   | Substitution | Nonsynonymous coding | 16% |
| MM18T | DOCK1    | dedicator of cytokinesis 1                                   | NM_001380       | chr10_128776221-128776221_G_A | 47R>Q   | Substitution | Nonsynonymous coding | 11% |
| MM18T | DOCK1    | dedicator of cytokinesis 1                                   | NM_001380       | chr10_129231595-129231595_C_T | 1634R>W | Substitution | Nonsynonymous coding | 10% |
| MM18T | DOCK10   | dedicator of cytokinesis 10                                  | CCDS46528.1     | chr2_225729713-225729713_G_A  | 450A>V  | Substitution | Nonsynonymous coding | 10% |
| MM18T | DOCK4    | dedicator of cytokinesis 4                                   | CCDS47688.1     | chr7_111409683-111409683_G_A  | 1235R>W | Substitution | Nonsynonymous coding | 16% |
| MM18T | DOCK4    | dedicator of cytokinesis 4                                   | CCDS47688.1     | chr7_111449433-111449433_C_T  | 1011A>T | Substitution | Nonsynonymous coding | 19% |
| MM18T | DOCK7    | dedicator of cytokinesis 7                                   | CCDS30734.1     | chr1_63005433-63005433_C_T    | 1028R>Q | Substitution | Nonsynonymous coding | 14% |
| MM18T | DOCK7    | dedicator of cytokinesis 7                                   | CCDS30734.1     | chr1_62921114-62921114_G_A    | 2101R>X | Substitution | Nonsense             | 13% |
| MM18T | DOCK8    | dedicator of cytokinesis 8                                   | ENST00000382329 | chr9_368229-368229_C_T        | 43R>C   | Substitution | Nonsynonymous coding | 11% |
| MM18T | DOCK9    | dedicator of cytokinesis 9                                   | ENST00000339416 | chr13_99446890-99446890_G_A   | 2091S>L | Substitution | Nonsynonymous coding | 13% |
| MM18T | DOCK9    | dedicator of cytokinesis 9                                   | CCDS45062.1     | chr13_99520615-99520615_C_A   | 987R>I  | Substitution | Nonsynonymous coding | 13% |



|       |         |                                                                           |             |                               |         |              |                      |     |
|-------|---------|---------------------------------------------------------------------------|-------------|-------------------------------|---------|--------------|----------------------|-----|
| MM18T | DOCK9   | dedicator of cytokinesis 9                                                | CCDS45062.1 | chr13_99540464-99540464_G_A   | 664A>V  | Substitution | Nonsynonymous coding | 27% |
| MM18T | DOHH    | deoxyhypusine hydroxylase/monooxygenase                                   | CCDS12108.1 | chr19_3491678-3491678_C_T     | 241E>K  | Substitution | Nonsynonymous coding | 20% |
| MM18T | DOK3    | docking protein 3                                                         | CCDS4426.1  | chr5_176935306-176935306_G_A  | 158R>X  | Substitution | Nonsense             | 11% |
| MM18T | DOPEY1  | dopey family member 1                                                     | CCDS4996.1  | chr6_83847852-83847852_C_A    | 1364P>H | Substitution | Nonsynonymous coding | 14% |
| MM18T | DOPEY2  | dopey family member 2                                                     | CCDS13643.1 | chr21_37584323-37584323_C_T   | 278L>F  | Substitution | Nonsynonymous coding | 16% |
| MM18T | DOPEY2  | dopey family member 2                                                     | CCDS13643.1 | chr21_37609634-37609634_C_A   | 899F>L  | Substitution | Nonsynonymous coding | 12% |
| MM18T | DOT1L   | DOT1-like, histone H3 methyltransferase ( <i>S. cerevisiae</i> )          | CCDS42460.1 | chr19_2216400-2216400_G_A     | 682E>K  | Substitution | Nonsynonymous coding | 11% |
| MM18T | DPP3    | dipeptidyl-peptidase 3                                                    | CCDS8141.1  | chr11_66249676-66249676_C_T   | 2A>V    | Substitution | Nonsynonymous coding | 10% |
| MM18T | DPP3    | dipeptidyl-peptidase 3                                                    | CCDS8141.1  | chr11_66258754-66258754_A_C   | 233K>T  | Substitution | Nonsynonymous coding | 17% |
| MM18T | DPP4    | dipeptidyl-peptidase 4                                                    | CCDS2216.1  | chr2_162865770-162865770_C_T  | 623R>Q  | Substitution | Nonsynonymous coding | 11% |
| MM18T | DPP4    | dipeptidyl-peptidase 4                                                    | CCDS2216.1  | chr2_162895518-162895518_C_A  | 145E>X  | Substitution | Nonsense             | 16% |
| MM18T | DPP6    | dipeptidyl-peptidase 6                                                    | NM_130797   | chr7_154172038-154172038_C_A  | 125L>M  | Substitution | Nonsynonymous coding | 14% |
| MM18T | DPPA4   | developmental pluripotency associated 4                                   | CCDS33814.1 | chr3_109050815-109050815_A_C  | 81I>S   | Substitution | Nonsynonymous coding | 15% |
| MM18T | DPPA5   | developmental pluripotency associated 5                                   | CCDS34483.1 | chr6_74063593-74063593_C_T    | 92R>H   | Substitution | Nonsynonymous coding | 13% |
| MM18T | DPY30   | dpy-30 homolog ( <i>C. elegans</i> )                                      | CCDS1777.1  | chr2_32254804-32254804_C_A    | 29R>I   | Substitution | Nonsynonymous coding | 18% |
| MM18T | DPYD    | dihydropyrimidine dehydrogenase                                           | CCDS30777.1 | chr1_97564155-97564155_G_A    | 886R>C  | Substitution | Nonsynonymous coding | 13% |
| MM18T | DPYSL2  | dihydropyrimidinase-like 2                                                | CCDS6051.1  | chr8_26439515-26439515_A_C    | 24I>L   | Substitution | Nonsynonymous coding | 14% |
| MM18T | DPYSL3  | dihydropyrimidinase-like 3                                                | CCDS43381.1 | chr5_146780289-146780289_T_C  | 359E>G  | Substitution | Nonsynonymous coding | 20% |
| MM18T | DPYSL3  | dihydropyrimidinase-like 3                                                | CCDS43381.1 | chr5_146777402-146777402_C_A  | 430E>X  | Substitution | Nonsense             | 15% |
| MM18T | DPYSL5  | dihydropyrimidinase-like 5                                                | CCDS1730.1  | chr2_27165464-27165464_A_G    | 429N>S  | Substitution | Nonsynonymous coding | 11% |
| MM18T | DRAXIN  | dorsal inhibitory axon guidance protein                                   | CCDS135.1   | chr11_11769470-11769470_C_T   | 197A>V  | Substitution | Nonsynonymous coding | 25% |
| MM18T | DRD3    | dopamine receptor D3                                                      | CCDS2978.1  | chr3_113890682-113890682_G_A  | 53A>V   | Substitution | Nonsynonymous coding | 19% |
| MM18T | DRGX    | dorsal root ganglia homeobox                                              | CCDS44388.1 | chr10_50574310-50574310_C_T   | 220E>K  | Substitution | Nonsynonymous coding | 24% |
| MM18T | DROSHA  | drosha, ribonuclease type III                                             | CCDS47195.1 | chr5_31409364-31409364_C_T    | 1248R>Q | Substitution | Nonsynonymous coding | 17% |
| MM18T | DROSHA  | drosha, ribonuclease type III                                             | CCDS47195.1 | chr5_31451698-31451698_C_A    | 875C>F  | Substitution | Nonsynonymous coding | 11% |
| MM18T | DSC2    | desmocollin 2                                                             | CCDS11892.1 | chr18_28648891-28648891_C_A   | 826W>L  | Substitution | Nonsynonymous coding | 16% |
| MM18T | DSC2    | desmocollin 2                                                             | CCDS11892.1 | chr18_28651732-28651732_C_A   | 655R>I  | Substitution | Nonsynonymous coding | 14% |
| MM18T | DSCAML1 | Down syndrome cell adhesion molecule like 1                               | CCDS8384.1  | chr11_117340670-117340670_T_C | 1054T>A | Substitution | Nonsynonymous coding | 16% |
| MM18T | DSCC1   | defective in sister chromatid cohesion 1 homolog ( <i>S. cerevisiae</i> ) | CCDS6330.1  | chr8_120854137-120854137_C_T  | 274R>Q  | Substitution | Nonsynonymous coding | 12% |
| MM18T | DSG2    | desmoglein 2                                                              | CCDS42423.1 | chr18_29126552-29126552_C_A   | 1068S>Y | Substitution | Nonsynonymous coding | 12% |
| MM18T | DSG3    | desmoglein 3                                                              | CCDS11898.1 | chr18_29055946-29055946_C_A   | 908S>Y  | Substitution | Nonsynonymous coding | 15% |
| MM18T | DSP     | desmoplakin                                                               | CCDS4501.1  | chr6_7583632-7583632_T_G      | 2046V>G | Substitution | Nonsynonymous coding | 20% |

|       |          |                                                                    |                 |                               |         |              |                      |     |
|-------|----------|--------------------------------------------------------------------|-----------------|-------------------------------|---------|--------------|----------------------|-----|
| MM18T | DSP      | desmoplakin                                                        | CCDS4501.1      | chr6_7584072-7584072_G_A      | 2193E>K | Substitution | Nonsynonymous coding | 16% |
| MM18T | DSP      | desmoplakin                                                        | CCDS4501.1      | chr6_7585737-7585737_G_A      | 2748E>K | Substitution | Nonsynonymous coding | 14% |
| MM18T | DST      | dystonin                                                           | CCDS4959.1      | chr6_56481510-56481510_C_T    | 2252G>E | Substitution | Nonsynonymous coding | 10% |
| MM18T | DTX3L    | deltex 3-like (Drosophila)                                         | CCDS3015.1      | chr3_122284818-122284818_A_C  | 100Q>H  | Substitution | Nonsynonymous coding | 13% |
| MM18T | DUOX2    | dual oxidase 2                                                     | CCDS10117.1     | chr15_45386880-45386880_C_T   | 1469E>K | Substitution | Nonsynonymous coding | 14% |
| MM18T | DUOX2    | dual oxidase 2                                                     | CCDS10117.1     | chr15_45387747-45387747_T_G   | 1376K>T | Substitution | Nonsynonymous coding | 11% |
| MM18T | DUOX2    | dual oxidase 2                                                     | CCDS10117.1     | chr15_45390239-45390239_T_G   | 1178K>T | Substitution | Nonsynonymous coding | 14% |
| MM18T | DUOX2    | dual oxidase 2                                                     | CCDS10117.1     | chr15_45396158-45396158_C_T   | 885R>Q  | Substitution | Nonsynonymous coding | 12% |
| MM18T | DUOX2    | dual oxidase 2                                                     | CCDS10117.1     | chr15_45403686-45403686_G_A   | 204A>V  | Substitution | Nonsynonymous coding | 25% |
| MM18T | DUOXA1   | dual oxidase maturation factor 1                                   | CCDS10119.1     | chr15_45409979-45409979_C_T   | 396E>K  | Substitution | Nonsynonymous coding | 18% |
| MM18T | DUPD1    | dual specificity phosphatase and pro isomerase domain containing 1 | CCDS31223.1     | chr10_76803681-76803681_C_T   | 99D>N   | Substitution | Nonsynonymous coding | 23% |
| MM18T | DUSP10   | dual specificity phosphatase 10                                    | CCDS1528.1      | chr1_221875990-221875990_G_T  | 405L>I  | Substitution | Nonsynonymous coding | 12% |
| MM18T | DUSP13   | dual specificity phosphatase 13                                    | NM_001007271    | chr10_76867879-76867879_C_T   | 80G>S   | Substitution | Nonsynonymous coding | 20% |
| MM18T | DUSP15   | dual specificity phosphatase 15                                    | ENST00000278979 | chr20_30436676-30436676_C_G   | 220C>S  | Substitution | Nonsynonymous coding | 13% |
| MM18T | DUSP26   | dual specificity phosphatase 26 (putative)                         | CCDS6092.1      | chr8_33449721-33449721_A_C    | 149L>R  | Substitution | Nonsynonymous coding | 12% |
| MM18T | DUSP27   | dual specificity phosphatase 27 (putative)                         | CCDS30932.1     | chr1_167097064-167097064_C_A  | 899S>Y  | Substitution | Nonsynonymous coding | 14% |
| MM18T | DUSP9    | dual specificity phosphatase 9                                     | CCDS14724.1     | chrX_152914971-152914971_G_A  | 220A>T  | Substitution | Nonsynonymous coding | 11% |
| MM18T | DYNC1H1  | dynein, cytoplasmic 1, heavy chain 1                               | CCDS9966.1      | chr14_102514240-102514240_A_G | 4365R>G | Substitution | Nonsynonymous coding | 16% |
| MM18T | DYNC1I1  | dynein, cytoplasmic 1, intermediate chain 1                        | CCDS5644.1      | chr7_95614243-95614243_G_A    | 250D>N  | Substitution | Nonsynonymous coding | 11% |
| MM18T | DYNC1I1  | dynein, cytoplasmic 1, intermediate chain 1                        | CCDS5644.1      | chr7_95664959-95664959_C_T    | 437S>F  | Substitution | Nonsynonymous coding | 23% |
| MM18T | DYNC1LI2 | dynein, cytoplasmic 1, light intermediate chain 2                  | CCDS10818.1     | chr16_66776563-66776563_G_A   | 103R>C  | Substitution | Nonsynonymous coding | 18% |
| MM18T | DYNC2H1  | dynein, cytoplasmic 2, heavy chain 1                               | CCDS44717.1     | chr11_102988538-102988538_A_C | 315K>N  | Substitution | Nonsynonymous coding | 11% |
| MM18T | DYNC2H1  | dynein, cytoplasmic 2, heavy chain 1                               | CCDS44717.1     | chr11_103074391-103074391_G_T | ISV-1>  | Substitution | Splice site acceptor | 11% |
| MM18T | DYNC2H1  | dynein, cytoplasmic 2, heavy chain 1                               | CCDS44717.1     | chr11_103055640-103055640_G_T | 2165E>X | Substitution | Nonsense             | 12% |
| MM18T | DYNC2LI1 | dynein, cytoplasmic 2, light intermediate chain 1                  | CCDS1813.1      | chr2_44023909-44023909_C_A    | 210A>E  | Substitution | Nonsynonymous coding | 10% |
| MM18T | DYRK1A   | dual-specificity tyrosine-(Y)-phosphorylation regulated kinase 1A  | CCDS42925.1     | chr21_38884667-38884667_C_A   | 709R>S  | Substitution | Nonsynonymous coding | 17% |
| MM18T | DYRK2    | dual-specificity tyrosine-(Y)-phosphorylation regulated kinase 2   | CCDS8978.1      | chr12_68051533-68051533_G_T   | 282M>I  | Substitution | Nonsynonymous coding | 13% |
| MM18T | DYSF     | dysferlin, limb girdle muscular dystrophy 2B (autosomal recessive) | CCDS46328.1     | chr2_71708048-71708048_G_A    | 43V>M   | Substitution | Nonsynonymous coding | 12% |
| MM18T | DYSF     | dysferlin, limb girdle muscular dystrophy 2B (autosomal recessive) | CCDS46328.1     | chr2_71740409-71740409_G_T    | 167S>I  | Substitution | Nonsynonymous coding | 13% |
| MM18T | DYSF     | dysferlin, limb girdle muscular dystrophy 2B (autosomal recessive) | CCDS46328.1     | chr2_71753426-71753426_G_A    | 409R>Q  | Substitution | Nonsynonymous coding | 14% |
| MM18T | DYSF     | dysferlin, limb girdle muscular dystrophy 2B (autosomal recessive) | CCDS46328.1     | chr2_71755433-71755433_G_A    | 428D>N  | Substitution | Nonsynonymous coding | 11% |
| MM18T | DYSF     | dysferlin, limb girdle muscular dystrophy 2B (autosomal recessive) | CCDS46328.1     | chr2_71883403-71883403_G_A    | 1580V>M | Substitution | Nonsynonymous coding | 14% |

|       |         |                                                                                        |             |                               |         |              |                      |     |
|-------|---------|----------------------------------------------------------------------------------------|-------------|-------------------------------|---------|--------------|----------------------|-----|
| MM18T | DYSF    | dysferlin, limb girdle muscular dystrophy 2B (autosomal recessive)                     | CCDS46328.1 | chr2_71886066-71886066_A_C    | 1605Q>P | Substitution | Nonsynonymous coding | 13% |
| MM18T | DZIP1L  | DAZ interacting protein 1-like                                                         | CCDS3096.1  | chr3_137781805-137781805_C_A  | 719E>D  | Substitution | Nonsynonymous coding | 21% |
| MM18T | E2F2    | E2F transcription factor 2                                                             | CCDS236.1   | chr1_23845519-23845519_C_T    | 281D>N  | Substitution | Nonsynonymous coding | 16% |
| MM18T | EAPP    | E2F-associated phosphoprotein                                                          | CCDS41941.1 | chr14_34998628-34998628_C_T   | 136E>K  | Substitution | Nonsynonymous coding | 13% |
| MM18T | EBLN2   | endogenous Bornavirus-like nucleoprotein 2                                             | NM_018029   | chr3_73111312-73111312_G_T    | 27R>I   | Substitution | Nonsynonymous coding | 15% |
| MM18T | ECE2    | endothelin converting enzyme 2                                                         | CCDS3256.2  | chr3_183995164-183995164_C_T  | 248R>W  | Substitution | Nonsynonymous coding | 15% |
| MM18T | ECM2    | extracellular matrix protein 2, female organ and adipocyte specific                    | CCDS6698.1  | chr9_95277071-95277071_C_T    | 299R>Q  | Substitution | Nonsynonymous coding | 24% |
| MM18T | ECT2L   | epithelial cell transforming sequence 2 oncogene-like                                  | CCDS43508.1 | chr6_139167722-139167722_A_C  | 271N>H  | Substitution | Nonsynonymous coding | 13% |
| MM18T | ECT2L   | epithelial cell transforming sequence 2 oncogene-like                                  | CCDS43508.1 | chr6_139186295-139186295_G_A  | 485S>N  | Substitution | Nonsynonymous coding | 10% |
| MM18T | EDA     | ectodysplasin A                                                                        | CCDS14394.1 | chrX_69253280-69253280_C_T    | 276R>C  | Substitution | Nonsynonymous coding | 13% |
| MM18T | EEA1    | early endosome antigen 1                                                               | CCDS31874.1 | chr12_93213184-93213184_T_C   | 543E>G  | Substitution | Nonsynonymous coding | 11% |
| MM18T | EEF1D   | eukaryotic translation elongation factor 1 delta (guanine nucleotide exchange protein) | CCDS6404.1  | chr8_144671886-144671886_C_A  | 122E>D  | Substitution | Nonsynonymous coding | 14% |
| MM18T | EEF2K   | eukaryotic elongation factor-2 kinase                                                  | CCDS10604.1 | chr16_22262515-22262515_G_A   | 164A>T  | Substitution | Nonsynonymous coding | 18% |
| MM18T | EFCAB11 | EF-hand calcium binding domain 11                                                      | CCDS9887.1  | chr14_90397912-90397912_G_A   | 128P>L  | Substitution | Nonsynonymous coding | 11% |
| MM18T | EFCAB12 | EF-hand calcium binding domain 12                                                      | NM_207307   | chr3_129120585-129120585_C_A  | 524D>Y  | Substitution | Nonsynonymous coding | 21% |
| MM18T | EFCAB14 | EF-hand calcium binding domain 14                                                      | CCDS30706.1 | chr1_47183591-47183591_G_A    | 57R>C   | Substitution | Nonsynonymous coding | 13% |
| MM18T | EFCAB5  | EF-hand calcium binding domain 5                                                       | NM_198529   | chr17_28296061-28296061__A    | NA      | Insertion    | Frameshift           | 13% |
| MM18T | EFCAB5  | EF-hand calcium binding domain 5                                                       | NM_198529   | chr17_28407808-28407808_C_A   | 1079P>T | Substitution | Nonsynonymous coding | 15% |
| MM18T | EFCAB6  | EF-hand calcium binding domain 6                                                       | CCDS14049.1 | chr22_43924810-43924810_G_T   | 1477H>N | Substitution | Nonsynonymous coding | 10% |
| MM18T | EFEMP1  | EGF containing fibulin-like extracellular matrix protein 1                             | CCDS1857.1  | chr2_56144796-56144796_C_A    | ISV+4>  | Substitution | Splice site donor    | 12% |
| MM18T | EFHB    | EF-hand domain family, member B                                                        | CCDS33715.2 | chr3_19938270-19938270_C_T    | 545R>Q  | Substitution | Nonsynonymous coding | 13% |
| MM18T | EFHC1   | EF-hand domain (C-terminal) containing 1                                               | CCDS4942.1  | chr6_52288965-52288965_G_T    | 95K>N   | Substitution | Nonsynonymous coding | 16% |
| MM18T | EFNA3   | ephrin-A3                                                                              | CCDS1090.1  | chr1_155058604-155058604_C_T  | 170T>I  | Substitution | Nonsynonymous coding | 27% |
| MM18T | EFNA4   | ephrin-A4                                                                              | CCDS44237.1 | chr1_155041513-155041513_G_T  | 163R>I  | Substitution | Nonsynonymous coding | 11% |
| MM18T | EFNB1   | ephrin-B1                                                                              | CCDS14391.1 | chrX_68049748-68049748_G_A    | ISV+1>  | Substitution | Splice site donor    | 25% |
| MM18T | EFNB2   | ephrin-B2                                                                              | CCDS9507.1  | chr13_107147266-107147266_T_G | 192R>S  | Substitution | Nonsynonymous coding | 10% |
| MM18T | EFR3B   | EFR3 homolog B (S. cerevisiae)                                                         | CCDS46231.1 | chr2_25315910-25315910_C_A    | 41F>L   | Substitution | Nonsynonymous coding | 16% |
| MM18T | EFS     | embryonal Fyn-associated substrate                                                     | CCDS9595.1  | chr14_23828743-23828743_G_A   | 315A>V  | Substitution | Nonsynonymous coding | 16% |
| MM18T | EGF     | epidermal growth factor                                                                | CCDS3689.1  | chr4_110920947-110920947_G_A  | 1040V>M | Substitution | Nonsynonymous coding | 20% |
| MM18T | EGFLAM  | EGF-like, fibronectin type III and laminin G domains                                   | CCDS3924.1  | chr5_38427206-38427206_G_A    | 636E>K  | Substitution | Nonsynonymous coding | 11% |
| MM18T | EGFLAM  | EGF-like, fibronectin type III and laminin G domains                                   | CCDS3924.1  | chr5_38425179-38425179_C_T    | 599R>X  | Substitution | Nonsense             | 11% |
| MM18T | EGFR    | epidermal growth factor receptor                                                       | CCDS5514.1  | chr7_55268923-55268923_T_G    | 997F>V  | Substitution | Nonsynonymous coding | 13% |

|       |         |                                                                                |             |                              |         |              |                      |     |
|-------|---------|--------------------------------------------------------------------------------|-------------|------------------------------|---------|--------------|----------------------|-----|
| MM18T | EHBP1   | EH domain binding protein 1                                                    | CCDS1872.1  | chr2_63175401-63175401_G_A   | 509D>N  | Substitution | Nonsynonymous coding | 15% |
| MM18T | EHBP1L1 | EH domain binding protein 1-like 1                                             | CCDS44649.1 | chr11_65350415-65350415_C_T  | 758L>F  | Substitution | Nonsynonymous coding | 11% |
| MM18T | EHD3    | EH-domain containing 3                                                         | CCDS1774.1  | chr2_31467208-31467208_C_T   | 99A>V   | Substitution | Nonsynonymous coding | 13% |
| MM18T | EHD3    | EH-domain containing 3                                                         | CCDS1774.1  | chr2_31489508-31489508_G_A   | 516E>K  | Substitution | Nonsynonymous coding | 10% |
| MM18T | EHHADH  | enoyl-CoA, hydratase/3-hydroxyacyl CoA dehydrogenase                           | CCDS33901.1 | chr3_184910738-184910738_C_T | 483R>Q  | Substitution | Nonsynonymous coding | 13% |
| MM18T | EHHADH  | enoyl-CoA, hydratase/3-hydroxyacyl CoA dehydrogenase                           | CCDS33901.1 | chr3_184910791-184910791_C_A | 465K>N  | Substitution | Nonsynonymous coding | 15% |
| MM18T | EID1    | EP300 interacting inhibitor of differentiation 1                               | NM_014335   | chr15_49170860-49170860_G_A  | 163E>K  | Substitution | Nonsynonymous coding | 11% |
| MM18T | EIF2AK1 | eukaryotic translation initiation factor 2-alpha kinase 1                      | CCDS5345.1  | chr7_6068550-6068550_C_A     | 482K>N  | Substitution | Nonsynonymous coding | 13% |
| MM18T | EIF2AK2 | eukaryotic translation initiation factor 2-alpha kinase 2                      | CCDS1786.1  | chr2_37341964-37341964_C_A   | 429K>N  | Substitution | Nonsynonymous coding | 11% |
| MM18T | EIF2AK4 | eukaryotic translation initiation factor 2 alpha kinase 4                      | CCDS42016.1 | chr15_40282520-40282520_C_A  | 858S>Y  | Substitution | Nonsynonymous coding | 12% |
| MM18T | EIF2B3  | eukaryotic translation initiation factor 2B, subunit 3 gamma, 58kDa            | CCDS517.1   | chr1_45446701-45446701_C_T   | 47G>E   | Substitution | Nonsynonymous coding | 13% |
| MM18T | EIF2B3  | eukaryotic translation initiation factor 2B, subunit 3 gamma, 58kDa            | CCDS517.1   | chr1_45446708-45446708_G_A   | 45R>C   | Substitution | Nonsynonymous coding | 17% |
| MM18T | EIF2C2  | eukaryotic translation initiation factor 2C, 2                                 | NM_012154   | chr8_141566312-141566312_G_A | 367A>V  | Substitution | Nonsynonymous coding | 15% |
| MM18T | EIF2C3  | eukaryotic translation initiation factor 2C, 3                                 | CCDS399.1   | chr1_36439076-36439076_C_T   | 208R>W  | Substitution | Nonsynonymous coding | 18% |
| MM18T | EIF3G   | eukaryotic translation initiation factor 3, subunit G                          | CCDS12227.1 | chr19_10226685-10226685_C_A  | 221G>W  | Substitution | Nonsynonymous coding | 17% |
| MM18T | EIF4G1  | eukaryotic translation initiation factor 4 gamma, 1                            | CCDS3259.1  | chr3_184033954-184033954_T_C | 32V>A   | Substitution | Nonsynonymous coding | 14% |
| MM18T | EIF4G3  | eukaryotic translation initiation factor 4 gamma, 3                            | CCDS214.1   | chr1_21137257-21137257_G_A   | 1517S>L | Substitution | Nonsynonymous coding | 12% |
| MM18T | EIF5A   | eukaryotic translation initiation factor 5A                                    | CCDS45601.1 | chr17_7213091-7213091_C_T    | 76S>L   | Substitution | Nonsynonymous coding | 15% |
| MM18T | EIF6    | eukaryotic translation initiation factor 6                                     | CCDS13249.1 | chr20_33868602-33868602_T_G  | 75N>T   | Substitution | Nonsynonymous coding | 10% |
| MM18T | ELAVL3  | ELAV (embryonic lethal, abnormal vision, Drosophila)-like 3 (Hu antigen C)     | CCDS32912.1 | chr19_11568951-11568951_G_A  | 213A>V  | Substitution | Nonsynonymous coding | 19% |
| MM18T | ELFN2   | extracellular leucine-rich repeat and fibronectin type III domain containing 2 | CCDS33642.1 | chr22_37771192-37771192_C_T  | 128R>H  | Substitution | Nonsynonymous coding | 10% |
| MM18T | ELL3    | elongation factor RNA polymerase II-like 3                                     | CCDS10102.1 | chr15_44066959-44066959_G_A  | 220P>S  | Substitution | Nonsynonymous coding | 18% |
| MM18T | ELMO2   | engulfment and cell motility 2                                                 | CCDS13398.1 | chr20_45000577-45000577_C_T  | 483R>Q  | Substitution | Nonsynonymous coding | 11% |
| MM18T | ELMO2   | engulfment and cell motility 2                                                 | CCDS13398.1 | chr20_45012121-45012121_C_A  | 230E>D  | Substitution | Nonsynonymous coding | 16% |
| MM18T | ELMO3   | engulfment and cell motility 3                                                 | CCDS10833.2 | chr16_67234867-67234867_G_A  | 300R>H  | Substitution | Nonsynonymous coding | 11% |
| MM18T | ELMOD3  | ELMO/CED-12 domain containing 3                                                | CCDS1973.1  | chr2_85598230-85598230_C_T   | 128R>X  | Substitution | Nonsense             | 16% |
| MM18T | ELMSAN1 | ELM2 and Myb/SANT-like domain containing 1                                     | CCDS9819.1  | chr14_74206648-74206648_C_A  | 22E>X   | Substitution | Nonsense             | 15% |
| MM18T | ELOVL2  | ELOVL fatty acid elongase 2                                                    | CCDS4518.1  | chr6_10984112-10984112_C_A   | 265D>Y  | Substitution | Nonsynonymous coding | 11% |
| MM18T | EMC1    | ER membrane protein complex subunit 1                                          | CCDS190.1   | chr1_19553854-19553854_C_T   | 719V>I  | Substitution | Nonsynonymous coding | 14% |
| MM18T | EMC3    | ER membrane protein complex subunit 3                                          | CCDS2594.1  | chr3_10016099-10016099_C_A   | 127W>C  | Substitution | Nonsynonymous coding | 11% |
| MM18T | EMILIN1 | elastin microfibril interfacer 1                                               | CCDS1733.1  | chr2_27305119-27305119_C_T   | 227A>V  | Substitution | Nonsynonymous coding | 13% |
| MM18T | EMILIN3 | elastin microfibril interfacer 3                                               | CCDS13316.1 | chr20_39992425-39992425_C_T  | 123G>S  | Substitution | Nonsynonymous coding | 11% |

|       |                 |                                                                     |             |                               |         |              |                      |     |
|-------|-----------------|---------------------------------------------------------------------|-------------|-------------------------------|---------|--------------|----------------------|-----|
| MM18T | EML2            | echinoderm microtubule associated protein like 2                    | CCDS12670.1 | chr19_46137593-46137593_C_T   | 106D>N  | Substitution | Nonsynonymous coding | 10% |
| MM18T | EML5            | echinoderm microtubule associated protein like 5                    | CCDS45148.1 | chr14_89089016-89089016_G_A   | 1649R>W | Substitution | Nonsynonymous coding | 20% |
| MM18T | EML5            | echinoderm microtubule associated protein like 5                    | CCDS45148.1 | chr14_89105177-89105177_T_C   | 1438N>D | Substitution | Nonsynonymous coding | 11% |
| MM18T | EMX2            | empty spiracles homeobox 2                                          | CCDS7601.1  | chr10_119305149-119305149_A_G | 138D>G  | Substitution | Nonsynonymous coding | 14% |
| MM18T | ENAM            | enamelin                                                            | CCDS3544.2  | chr4_71510289-71510289_C_T    | 1049P>L | Substitution | Nonsynonymous coding | 16% |
| MM18T | ENDOD1          | endonuclease domain containing 1                                    | CCDS41699.1 | chr11_94862357-94862357_G_A   | 373E>K  | Substitution | Nonsynonymous coding | 16% |
| MM18T | ENGASE          | endo-beta-N-acetylglucosaminidase                                   | CCDS42394.1 | chr17_77079118-77079118_G_A   | 352R>Q  | Substitution | Nonsynonymous coding | 16% |
| MM18T | ENO2            | enolase 2 (gamma, neuronal) [Source:HGNC Symbol;Acc:3353]           | CCDS8570.1  | chr12_7027207-7027207_G_A     | 183R>Q  | Substitution | Nonsynonymous coding | 11% |
| MM18T | ENOX1           | ecto-NOX disulfide-thiol exchanger 1                                | CCDS9389.1  | chr13_43788142-43788142_C_T   | 639G>E  | Substitution | Nonsynonymous coding | 12% |
| MM18T | ENPEP           | glutamyl aminopeptidase (aminopeptidase A)                          | CCDS3691.1  | chr4_111397859-111397859_G_A  | 97V>I   | Substitution | Nonsynonymous coding | 16% |
| MM18T | ENPEP           | glutamyl aminopeptidase (aminopeptidase A)                          | CCDS3691.1  | chr4_111431437-111431437_G_T  | 411D>Y  | Substitution | Nonsynonymous coding | 12% |
| MM18T | ENSG00000005189 | -                                                                   | CCDS10591.1 | chr16_20851177-20851177_A_C   | 495K>T  | Substitution | Nonsynonymous coding | 11% |
| MM18T | ENSG00000088899 | -                                                                   | CCDS13049.1 | chr20_3146363-3146363_C_T     | 368R>Q  | Substitution | Nonsynonymous coding | 14% |
| MM18T | ENSG00000117598 | -                                                                   | CCDS30778.1 | chr1_99418703-99418703_C_A    | 182D>Y  | Substitution | Nonsynonymous coding | 12% |
| MM18T | ENSG00000143674 | -                                                                   | CCDS1598.1  | chr1_233464034-233464034_G_A  | 87R>Q   | Substitution | Nonsynonymous coding | 20% |
| MM18T | ENSG00000163075 | -                                                                   | CCDS33282.1 | chr2_120362787-120362787_C_T  | 66T>M   | Substitution | Nonsynonymous coding | 10% |
| MM18T | ENSG00000163075 | -                                                                   | CCDS33282.1 | chr2_120385298-120385298_C_T  | 243S>L  | Substitution | Nonsynonymous coding | 13% |
| MM18T | ENSG00000163075 | -                                                                   | CCDS33282.1 | chr2_120388361-120388361_A_G  | 334T>A  | Substitution | Nonsynonymous coding | 13% |
| MM18T | ENSG00000167634 | -                                                                   | CCDS46183.1 | chr19_55447767-55447767_C_T   | 721R>Q  | Substitution | Nonsynonymous coding | 12% |
| MM18T | ENSG00000172901 | -                                                                   | CCDS4124.1  | chr5_115346547-115346547_C_T  | 735L>F  | Substitution | Nonsynonymous coding | 11% |
| MM18T | ENSG00000173517 | -                                                                   | CCDS42062.1 | chr15_77426032-77426032_T_C   | 1131D>G | Substitution | Nonsynonymous coding | 16% |
| MM18T | ENSG00000173517 | -                                                                   | CCDS42062.1 | chr15_77473621-77473621_T_G   | 216E>D  | Substitution | Nonsynonymous coding | 10% |
| MM18T | ENSG00000177453 | -                                                                   | CCDS3943.1  | chr5_43280700-43280700_G_C    | 394V>L  | Substitution | Nonsynonymous coding | 15% |
| MM18T | ENSG00000182319 | -                                                                   | CCDS43706.1 | chr8_8176587-8176587_C_T      | 1100D>N | Substitution | Nonsynonymous coding | 12% |
| MM18T | ENTPD4          | ectonucleoside triphosphate diphosphohydrolase 4                    | CCDS6041.1  | chr8_23290534-23290534_G_A    | 586R>W  | Substitution | Nonsynonymous coding | 21% |
| MM18T | EOMES           | eomesodermin                                                        | CCDS2646.1  | chr3_27763043-27763043_G_A    | 248A>V  | Substitution | Nonsynonymous coding | 22% |
| MM18T | EPB41           | erythrocyte membrane protein band 4.1 (elliptocytosis 1, RH-linked) | CCDS330.1   | chr1_29342245-29342245_C_T    | 256P>S  | Substitution | Nonsynonymous coding | 31% |
| MM18T | EPB41L2         | erythrocyte membrane protein band 4.1-like 2                        | CCDS5141.1  | chr6_131186775-131186775_C_A  | ISV-1>  | Substitution | Splice site acceptor | 14% |
| MM18T | EPB41L2         | erythrocyte membrane protein band 4.1-like 2                        | CCDS5141.1  | chr6_131186777-131186777_T_G  | ISV-3>  | Substitution | Splice site acceptor | 14% |
| MM18T | EPB41L3         | erythrocyte membrane protein band 4.1-like 3                        | CCDS11838.1 | chr18_5489178-5489178_G_A     | 2T>M    | Substitution | Nonsynonymous coding | 11% |
| MM18T | EPB41L4A        | erythrocyte membrane protein band 4.1 like 4A                       | CCDS43350.1 | chr5_111504758-111504758_C_T  | 595R>Q  | Substitution | Nonsynonymous coding | 15% |
| MM18T | EPB41L4A        | erythrocyte membrane protein band 4.1 like 4A                       | CCDS43350.1 | chr5_111519713-111519713_G_A  | 541S>L  | Substitution | Nonsynonymous coding | 10% |

|       |          |                                                                                       |             |                               |         |              |                      |     |
|-------|----------|---------------------------------------------------------------------------------------|-------------|-------------------------------|---------|--------------|----------------------|-----|
| MM18T | EPB49    | erythrocyte membrane protein band 4.9 (dematin)                                       | CCDS6020.1  | chr8_21927803-21927803_G_A    | 188E>K  | Substitution | Nonsynonymous coding | 17% |
| MM18T | EPG5     | ectopic P-granules autophagy protein 5 homolog (C. elegans)                           | CCDS11926.2 | chr18_43467728-43467728_C_A   | 1699E>D | Substitution | Nonsynonymous coding | 13% |
| MM18T | EPHA10   | EPH receptor A10                                                                      | CCDS41305.1 | chr1_38200979-38200979_C_T    | 481G>R  | Substitution | Nonsynonymous coding | 25% |
| MM18T | EPHA10   | EPH receptor A10                                                                      | CCDS41305.1 | chr1_38227628-38227628_C_T    | 100R>H  | Substitution | Nonsynonymous coding | 24% |
| MM18T | EPHA2    | EPH receptor A2                                                                       | CCDS169.1   | chr1_16458756-16458756_C_T    | 710E>K  | Substitution | Nonsynonymous coding | 21% |
| MM18T | EPHA3    | EPH receptor A3                                                                       | CCDS2922.1  | chr3_89448592-89448592_C_T    | 519T>M  | Substitution | Nonsynonymous coding | 11% |
| MM18T | EPHA3    | EPH receptor A3                                                                       | CCDS2922.1  | chr3_89468517-89468517_G_A    | 684R>Q  | Substitution | Nonsynonymous coding | 12% |
| MM18T | EPHA4    | EPH receptor A4                                                                       | CCDS2447.1  | chr2_222321384-222321384_C_A  | 518A>S  | Substitution | Nonsynonymous coding | 17% |
| MM18T | EPHA4    | EPH receptor A4                                                                       | CCDS2447.1  | chr2_222428697-222428697_C_T  | 193A>T  | Substitution | Nonsynonymous coding | 11% |
| MM18T | EPHA5    | EPH receptor A5                                                                       | CCDS3513.1  | chr4_66467778-66467778_C_A    | 164R>I  | Substitution | Nonsynonymous coding | 10% |
| MM18T | EPHA8    | EPH receptor A8                                                                       | CCDS225.1   | chr1_22903295-22903295_G_A    | 249A>T  | Substitution | Nonsynonymous coding | 25% |
| MM18T | EPHA8    | EPH receptor A8                                                                       | CCDS225.1   | chr1_22920031-22920031_G_T    | 485Q>H  | Substitution | Nonsynonymous coding | 12% |
| MM18T | EPM2AIP1 | EPM2A (laforin) interacting protein 1                                                 | CCDS46790.1 | chr3_37033373-37033373_C_T    | 399R>Q  | Substitution | Nonsynonymous coding | 12% |
| MM18T | EPN1     | epsin 1                                                                               | CCDS46198.1 | chr19_56196904-56196904_G_A   | 235R>H  | Substitution | Nonsynonymous coding | 17% |
| MM18T | EPN2     | epsin 2                                                                               | CCDS11203.1 | chr17_19215404-19215404_A_G   | 307M>V  | Substitution | Nonsynonymous coding | 12% |
| MM18T | EPRS     | glutamyl-prolyl-tRNA synthetase                                                       | CCDS31027.1 | chr1_220146630-220146630_C_A  | 1398E>D | Substitution | Nonsynonymous coding | 14% |
| MM18T | EPS15L1  | epidermal growth factor receptor pathway substrate 15-like 1                          | CCDS32944.1 | chr19_16528821-16528821_C_T   | 349D>N  | Substitution | Nonsynonymous coding | 18% |
| MM18T | EPS15L1  | epidermal growth factor receptor pathway substrate 15-like 1                          | CCDS32944.1 | chr19_16539529-16539529_C_T   | 181R>Q  | Substitution | Nonsynonymous coding | 12% |
| MM18T | EPS8L2   | EPS8-like 2                                                                           | CCDS31328.1 | chr11_721083-721083_C_T       | 193R>W  | Substitution | Nonsynonymous coding | 20% |
| MM18T | EPX      | eosinophil peroxidase                                                                 | CCDS11602.1 | chr17_56274358-56274358_C_T   | 287S>L  | Substitution | Nonsynonymous coding | 15% |
| MM18T | ERAP1    | endoplasmic reticulum aminopeptidase 1                                                | CCDS4085.1  | chr5_96126252-96126252_T      | NA      | Insertion    | Frameshift           | 11% |
| MM18T | ERAP2    | endoplasmic reticulum aminopeptidase 2                                                | CCDS4086.1  | chr5_96219512-96219512_G_T    | 198D>Y  | Substitution | Nonsynonymous coding | 16% |
| MM18T | ERAP2    | endoplasmic reticulum aminopeptidase 2                                                | CCDS4086.1  | chr5_96249136-96249136_G_T    | 878E>X  | Substitution | Nonsense             | 16% |
| MM18T | ERAS     | ES cell expressed Ras                                                                 | CCDS35246.1 | chrX_48687744-48687744_G_A    | 71D>N   | Substitution | Nonsynonymous coding | 16% |
| MM18T | ERBB4    | v-erb-a erythroblastic leukemia viral oncogene homolog 4 (avian)                      | CCDS2394.1  | chr2_212812293-212812293_G_A  | 95R>C   | Substitution | Nonsynonymous coding | 12% |
| MM18T | ERC2     | ELKS/RAB6-interacting/CAST family member 2                                            | CCDS46851.1 | chr3_56041248-56041248_C_A    | 674K>N  | Substitution | Nonsynonymous coding | 14% |
| MM18T | ERC2     | ELKS/RAB6-interacting/CAST family member 2                                            | CCDS46851.1 | chr3_56114979-56114979_C_T    | 503E>K  | Substitution | Nonsynonymous coding | 18% |
| MM18T | ERC2     | ELKS/RAB6-interacting/CAST family member 2                                            | CCDS46851.1 | chr3_56330343-56330343_C_T    | 260E>K  | Substitution | Nonsynonymous coding | 12% |
| MM18T | ERCC5    | excision repair cross-complementing rodent repair deficiency, complementation group 5 | CCDS32004.1 | chr13_103504506-103504506_C_T | 43R>W   | Substitution | Nonsynonymous coding | 17% |
| MM18T | ERCC5    | excision repair cross-complementing rodent repair deficiency, complementation group 5 | CCDS32004.1 | chr13_103514694-103514694_G_A | 399E>K  | Substitution | Nonsynonymous coding | 14% |
| MM18T | ERCC5    | excision repair cross-complementing rodent repair deficiency, complementation group 5 | CCDS32004.1 | chr13_103527705-103527705_G_T | 1005E>X | Substitution | Nonsense             | 17% |
| MM18T | ERCC6    | excision repair cross-complementing rodent repair deficiency, complementation group 6 | CCDS7229.1  | chr10_50667037-50667037_C_T   | 1436A>T | Substitution | Nonsynonymous coding | 12% |

|       |        |                                                                                       |             |                              |         |              |                      |     |
|-------|--------|---------------------------------------------------------------------------------------|-------------|------------------------------|---------|--------------|----------------------|-----|
| MM18T | ERCC6  | excision repair cross-complementing rodent repair deficiency, complementation group 6 | CCDS7229.1  | chr10_50668464-50668464_G_T  | 1339F>L | Substitution | Nonsynonymous coding | 14% |
| MM18T | ERCC6  | excision repair cross-complementing rodent repair deficiency, complementation group 6 | CCDS7229.1  | chr10_50732662-50732662_C_T  | 272E>K  | Substitution | Nonsynonymous coding | 12% |
| MM18T | ERCC6L | excision repair cross-complementing rodent repair deficiency, complementation group 6 | CCDS35329.1 | chrX_71427863-71427863_G_A   | 252R>C  | Substitution | Nonsynonymous coding | 13% |
| MM18T | ERG    | v-ets erythroblastosis virus E26 oncogene homolog (avian)                             | CCDS46648.1 | chr21_39775625-39775625_G_A  | 139T>M  | Substitution | Nonsynonymous coding | 16% |
| MM18T | ERGIC1 | endoplasmic reticulum-golgi intermediate compartment (ERGIC) 1                        | CCDS34292.1 | chr5_172341755-172341755_G_A | 97E>K   | Substitution | Nonsynonymous coding | 17% |
| MM18T | ERI2   | ERI1 exoribonuclease family member 2                                                  | CCDS45436.1 | chr16_20810180-20810180_T_G  | 314K>N  | Substitution | Nonsynonymous coding | 20% |
| MM18T | ERLEC1 | endoplasmic reticulum lectin 1                                                        | CCDS1848.1  | chr2_54035569-54035569_T_C   | 338F>S  | Substitution | Nonsynonymous coding | 11% |
| MM18T | ERMP1  | endoplasmic reticulum metalloproteinase 1                                             | CCDS34983.1 | chr9_5811254-5811254_C_T     | 395R>Q  | Substitution | Nonsynonymous coding | 11% |
| MM18T | ERN2   | endoplasmic reticulum to nucleus signaling 2                                          | CCDS32407.1 | chr16_23712290-23712290_A_G  | 498V>A  | Substitution | Nonsynonymous coding | 18% |
| MM18T | ERP44  | endoplasmic reticulum protein 44                                                      | CCDS35082.1 | chr9_102783003-102783003_C_A | 161R>I  | Substitution | Nonsynonymous coding | 18% |
| MM18T | ERRF1  | ERBB receptor feedback inhibitor 1                                                    | CCDS94.1    | chr1_8075631-8075631_T       | NA      | Insertion    | Frameshift           | 13% |
| MM18T | ESF1   | ESF1, nucleolar pre-rRNA processing protein, homolog (S. cerevisiae)                  | CCDS13117.1 | chr20_13755907-13755907_G_A  | 349R>X  | Substitution | Nonsense             | 13% |
| MM18T | ESPL1  | extra spindle pole bodies homolog 1 (S. cerevisiae)                                   | CCDS8852.1  | chr12_53664517-53664517_T_C  | 435V>A  | Substitution | Nonsynonymous coding | 14% |
| MM18T | ESPL1  | extra spindle pole bodies homolog 1 (S. cerevisiae)                                   | CCDS8852.1  | chr12_53662632-53662632_G_A  | ISV+1>  | Substitution | Splice site donor    | 14% |
| MM18T | ESPNL  | espin-like                                                                            | CCDS2525.1  | chr2_239040133-239040133_C_A | 926F>L  | Substitution | Nonsynonymous coding | 13% |
| MM18T | ESX1   | ESX homeobox 1                                                                        | CCDS14516.1 | chrX_103497477-103497477_T_C | 180E>G  | Substitution | Nonsynonymous coding | 12% |
| MM18T | ESYT2  | extended synaptotagmin-like protein 2                                                 | CCDS34791.1 | chr7_158527152-158527152_G_A | 866A>V  | Substitution | Nonsynonymous coding | 14% |
| MM18T | ESYT3  | extended synaptotagmin-like protein 3                                                 | CCDS3101.2  | chr3_138192395-138192395_G_A | 752R>Q  | Substitution | Nonsynonymous coding | 17% |
| MM18T | ETAA1  | Ewing tumor-associated antigen 1                                                      | CCDS1882.1  | chr2_67631327-67631327_A_C   | 505K>Q  | Substitution | Nonsynonymous coding | 15% |
| MM18T | ETFB   | electron-transfer-flavoprotein, beta polypeptide                                      | CCDS33085.1 | chr19_51856535-51856535_G_A  | 167R>C  | Substitution | Nonsynonymous coding | 16% |
| MM18T | ETS2   | v-ets erythroblastosis virus E26 oncogene homolog 2 (avian)                           | CCDS13659.1 | chr21_40186299-40186299_G_A  | 96R>H   | Substitution | Nonsynonymous coding | 12% |
| MM18T | ETV4   | ets variant 4                                                                         | CCDS11465.1 | chr17_41606535-41606535_G_A  | 400R>X  | Substitution | Nonsense             | 15% |
| MM18T | ETV5   | ets variant 5                                                                         | CCDS33906.1 | chr3_185823474-185823474_G_A | 25R>W   | Substitution | Nonsynonymous coding | 13% |
| MM18T | EVISL  | ecotropic viral integration site 5-like                                               | CCDS12188.1 | chr19_7925505-7925505_C_T    | 467S>L  | Substitution | Nonsynonymous coding | 15% |
| MM18T | EVPL   | envoplakin                                                                            | CCDS11737.1 | chr17_74003351-74003351_C_T  | 1979E>K | Substitution | Nonsynonymous coding | 14% |
| MM18T | EVPL   | envoplakin                                                                            | CCDS11737.1 | chr17_74011678-74011678_G_A  | 581T>M  | Substitution | Nonsynonymous coding | 16% |
| MM18T | EVPL   | envoplakin                                                                            | CCDS11737.1 | chr17_74017847-74017847_C_T  | 275E>K  | Substitution | Nonsynonymous coding | 18% |
| MM18T | EWSR1  | Ewing sarcoma breakpoint region 1                                                     | CCDS13851.1 | chr22_29694761-29694761_C_T  | 486R>C  | Substitution | Nonsynonymous coding | 13% |
| MM18T | EXD1   | exonuclease 3'-5' domain containing 1                                                 | CCDS10072.1 | chr15_41488184-41488184_G_A  | 138R>X  | Substitution | Nonsense             | 10% |
| MM18T | EXD2   | exonuclease 3'-5' domain containing 2                                                 | CCDS9793.1  | chr14_69701699-69701699_G_T  | 209D>Y  | Substitution | Nonsynonymous coding | 12% |
| MM18T | EXD2   | exonuclease 3'-5' domain containing 2                                                 | CCDS9793.1  | chr14_69707621-69707621_T_C  | 432V>A  | Substitution | Nonsynonymous coding | 23% |
| MM18T | EXD3   | exonuclease 3'-5' domain containing 3                                                 | CCDS48066.1 | chr9_140201633-140201633_C_A | 800E>D  | Substitution | Nonsynonymous coding | 14% |

|       |          |                                                  |                 |                               |        |              |                      |     |
|-------|----------|--------------------------------------------------|-----------------|-------------------------------|--------|--------------|----------------------|-----|
| MM18T | EXO1     | exonuclease 1                                    | CCDS1620.1      | chr1_242048768-242048768_G_T  | 788Q>H | Substitution | Nonsynonymous coding | 14% |
| MM18T | EXO5     | exonuclease 5                                    | CCDS453.1       | chr1_40981033-40981033_G_A    | 273E>K | Substitution | Nonsynonymous coding | 19% |
| MM18T | EXOC2    | exocyst complex component 2                      | CCDS34327.1     | chr6_532576-532576_C_A        | 758R>I | Substitution | Nonsynonymous coding | 14% |
| MM18T | EXOC2    | exocyst complex component 2                      | CCDS34327.1     | chr6_576760-576760_C_T        | 439D>N | Substitution | Nonsynonymous coding | 28% |
| MM18T | EXOC3L1  | exocyst complex component 3-like 1               | CCDS10832.1     | chr16_67219382-67219382_G_T   | 503S>Y | Substitution | Nonsynonymous coding | 12% |
| MM18T | EXOC3L2  | exocyst complex component 3-like 2               | CCDS12657.1     | chr19_45731518-45731518_T_C   | 33T>A  | Substitution | Nonsynonymous coding | 20% |
| MM18T | EXOC3L4  | exocyst complex component 3-like 4               | CCDS32163.1     | chr14_103566885-103566885_T_C | 110V>A | Substitution | Nonsynonymous coding | 11% |
| MM18T | EXOC4    | exocyst complex component 4                      | CCDS5829.1      | chr7_132990739-132990739_G_T  | 194D>Y | Substitution | Nonsynonymous coding | 12% |
| MM18T | EXOC4    | exocyst complex component 4                      | CCDS5829.1      | chr7_133622720-133622720_C_T  | 702R>C | Substitution | Nonsynonymous coding | 10% |
| MM18T | EXOC6    | exocyst complex component 6                      | CCDS7424.2      | chr10_94700506-94700506_G_A   | 412R>Q | Substitution | Nonsynonymous coding | 10% |
| MM18T | EXOC6    | exocyst complex component 6                      | CCDS7424.2      | chr10_94733817-94733817_G_A   | 594R>Q | Substitution | Nonsynonymous coding | 23% |
| MM18T | EXOC6B   | exocyst complex component 6B                     | CCDS46333.1     | chr2_72707863-72707863_A_G    | 561I>T | Substitution | Nonsynonymous coding | 12% |
| MM18T | EXOG     | endo/exonuclease (5'-3'), endonuclease G-like    | ENST00000358249 | chr3_38583424-38583424_G_T    | 146G>V | Substitution | Nonsynonymous coding | 13% |
| MM18T | EXOSC5   | exosome component 5                              | CCDS12580.1     | chr19_41903127-41903127_T_C   | 36N>S  | Substitution | Nonsynonymous coding | 12% |
| MM18T | EXOSC6   | exosome component 6                              | CCDS10887.1     | chr16_70285367-70285367_A_G   | 146V>A | Substitution | Nonsynonymous coding | 27% |
| MM18T | EXT1     | exostosin 1                                      | CCDS6324.1      | chr8_118811958-118811958_C_T  | 745R>Q | Substitution | Nonsynonymous coding | 12% |
| MM18T | EYS      | eyes shut homolog (Drosophila)                   | CCDS47445.1     | chr6_66006001-66006001_G_T    | 593S>Y | Substitution | Nonsynonymous coding | 15% |
| MM18T | EYS      | eyes shut homolog (Drosophila)                   | CCDS47445.1     | chr6_66205254-66205254_G_T    | 17S>Y  | Substitution | Nonsynonymous coding | 10% |
| MM18T | EZH2     | enhancer of zeste homolog 2 (Drosophila)         | CCDS5891.1      | chr7_148511064-148511064_C_T  | 613R>Q | Substitution | Nonsynonymous coding | 12% |
| MM18T | F11      | coagulation factor XI                            | CCDS3847.1      | chr4_187207578-187207578_G_A  | 497R>Q | Substitution | Nonsynonymous coding | 17% |
| MM18T | F11      | coagulation factor XI                            | CCDS3847.1      | chr4_187207608-187207608_G_T  | 507R>I | Substitution | Nonsynonymous coding | 18% |
| MM18T | F2RL1    | coagulation factor II (thrombin) receptor-like 1 | CCDS4033.1      | chr5_76115015-76115015_G_T    | 3S>I   | Substitution | Nonsynonymous coding | 12% |
| MM18T | FAM111B  | family with sequence similarity 111, member B    | CCDS7972.1      | chr11_58892280-58892280_A_G   | 237E>G | Substitution | Nonsynonymous coding | 14% |
| MM18T | FAM114A1 | family with sequence similarity 114, member A1   | CCDS3447.1      | chr9_38916671-38916671_C_A    | 308L>M | Substitution | Nonsynonymous coding | 17% |
| MM18T | FAM120A  | family with sequence similarity 120A             | CCDS6706.1      | chr9_96214574-96214574_T_C    | 126V>A | Substitution | Nonsynonymous coding | 26% |
| MM18T | FAM120A  | family with sequence similarity 120A             | CCDS6706.1      | chr9_96259786-96259786_G_A    | 280D>N | Substitution | Nonsynonymous coding | 16% |
| MM18T | FAM120A  | family with sequence similarity 120A             | CCDS6706.1      | chr9_96312885-96312885_G_A    | 729R>H | Substitution | Nonsynonymous coding | 21% |
| MM18T | FAM124A  | family with sequence similarity 124A             | CCDS9427.1      | chr13_51825726-51825726_G_A   | 111D>N | Substitution | Nonsynonymous coding | 17% |
| MM18T | FAM124A  | family with sequence similarity 124A             | CCDS9427.1      | chr13_51826021-51826021_G_A   | 209R>H | Substitution | Nonsynonymous coding | 17% |
| MM18T | FAM129B  | family with sequence similarity 129, member B    | CCDS35145.1     | chr9_130279268-130279268_C_T  | 281E>K | Substitution | Nonsynonymous coding | 23% |
| MM18T | FAM132B  | family with sequence similarity 132, member B    | ENST00000408994 | chr2_239070348-239070348_G_T  | 104K>N | Substitution | Nonsynonymous coding | 12% |
| MM18T | FAM135A  | family with sequence similarity 135, member A    | CCDS47448.1     | chr6_71235776-71235776_A      | NA     | Insertion    | Frameshift           | 17% |



|       |          |                                                           |                 |                               |         |              |                      |     |
|-------|----------|-----------------------------------------------------------|-----------------|-------------------------------|---------|--------------|----------------------|-----|
| MM18T | FAM135A  | family with sequence similarity 135, member A             | CCDS47448.1     | chr6_71234739-71234739_C_A    | 455S>Y  | Substitution | Nonsynonymous coding | 18% |
| MM18T | FAM135A  | family with sequence similarity 135, member A             | CCDS47448.1     | chr6_71235271-71235271_T_G    | 632S>R  | Substitution | Nonsynonymous coding | 16% |
| MM18T | FAM135A  | family with sequence similarity 135, member A             | CCDS47448.1     | chr6_71236136-71236136_A_G    | 921T>A  | Substitution | Nonsynonymous coding | 18% |
| MM18T | FAM135A  | family with sequence similarity 135, member A             | CCDS47448.1     | chr6_71269591-71269591_C_A    | 1309F>L | Substitution | Nonsynonymous coding | 13% |
| MM18T | FAM135B  | family with sequence similarity 135, member B             | CCDS6375.2      | chr8_139160793-139160793_G_T  | 1140H>N | Substitution | Nonsynonymous coding | 11% |
| MM18T | FAM135B  | family with sequence similarity 135, member B             | CCDS6375.2      | chr8_139255253-139255253_C_A  | 201E>X  | Substitution | Nonsense             | 13% |
| MM18T | FAM13A   | family with sequence similarity 13, member A              | CCDS34029.1     | chr4_89668865-89668865_G_A    | 767P>S  | Substitution | Nonsynonymous coding | 13% |
| MM18T | FAM149A  | family with sequence similarity 149, member A             | CCDS34117.1     | chr4_187078876-187078876_C_T  | ISV+3>  | Substitution | Splice site donor    | 24% |
| MM18T | FAM149B1 | family with sequence similarity 149, member B1            | CCDS44435.1     | chr10_74992840-74992840_G_A   | 424R>Q  | Substitution | Nonsynonymous coding | 18% |
| MM18T | FAM150B  | family with sequence similarity 150, member B             | CCDS46218.1     | chr2_287709-287709_C_T        | 43E>K   | Substitution | Nonsynonymous coding | 11% |
| MM18T | FAM155B  | family with sequence similarity 155, member B             | CCDS35317.1     | chrX_68748995-68748995_T_C    | 341F>L  | Substitution | Nonsynonymous coding | 15% |
| MM18T | FAM160B1 | family with sequence similarity 160, member B1            | CCDS31290.1     | chr10_116595893-116595893_G_T | 137R>I  | Substitution | Nonsynonymous coding | 12% |
| MM18T | FAM160B2 | family with sequence similarity 160, member B2            | CCDS6021.2      | chr8_21959237-21959237_C_T    | 576R>C  | Substitution | Nonsynonymous coding | 17% |
| MM18T | FAM162B  | family with sequence similarity 162, member B             | CCDS43497.1     | chr6_117086310-117086310_G_A  | 94P>L   | Substitution | Nonsynonymous coding | 18% |
| MM18T | FAM166B  | family with sequence similarity 166, member B             | CCDS47963.1     | chr9_35562935-35562935_C_A    | 143E>D  | Substitution | Nonsynonymous coding | 19% |
| MM18T | FAM169A  | family with sequence similarity 169, member A             | CCDS43330.1     | chr5_74077438-74077438_C_A    | 620E>D  | Substitution | Nonsynonymous coding | 13% |
| MM18T | FAM169A  | family with sequence similarity 169, member A             | CCDS43330.1     | chr5_74096825-74096825_G_T    | 328T>N  | Substitution | Nonsynonymous coding | 13% |
| MM18T | FAM172BP | family with sequence similarity 172, member B, pseudogene | ENST00000313598 | chr3_101241279-101241279_C_A  | 182S>Y  | Substitution | Nonsynonymous coding | 12% |
| MM18T | FAM174B  | family with sequence similarity 174, member B             | CCDS45355.1     | chr15_93173457-93173457_C_T   | 155D>N  | Substitution | Nonsynonymous coding | 16% |
| MM18T | FAM179B  | family with sequence similarity 179, member B             | CCDS9681.1      | chr14_45537733-45537733_C_A   | 1566S>Y | Substitution | Nonsynonymous coding | 14% |
| MM18T | FAM181A  | family with sequence similarity 181, member A             | CCDS9914.1      | chr14_94394743-94394743_C_T   | 100R>C  | Substitution | Nonsynonymous coding | 13% |
| MM18T | FAM184A  | family with sequence similarity 184, member A             | CCDS43499.1     | chr6_119327731-119327731_G_T  | 566L>I  | Substitution | Nonsynonymous coding | 11% |
| MM18T | FAM192A  | family with sequence similarity 192, member A             | CCDS42168.1     | chr16_57188255-57188255_C_T   | 238G>R  | Substitution | Nonsynonymous coding | 16% |
| MM18T | FAM198A  | family with sequence similarity 198, member A             | CCDS46808.1     | chr3_43074441-43074441_G_T    | 229W>L  | Substitution | Nonsynonymous coding | 12% |
| MM18T | FAM199X  | family with sequence similarity 199, X-linked             | CCDS35364.1     | chrX_103420429-103420429_C_A  | 108S>Y  | Substitution | Nonsynonymous coding | 17% |
| MM18T | FAM209A  | family with sequence similarity 209, member A             | CCDS33493.1     | chr20_55101052-55101052_C_T   | 148R>X  | Substitution | Nonsense             | 11% |
| MM18T | FAM210A  | family with sequence similarity 210, member A             | CCDS11866.1     | chr18_13681794-13681794_C_A   | 95V>F   | Substitution | Nonsynonymous coding | 16% |
| MM18T | FAM212B  | family with sequence similarity 212, member B             | CCDS841.1       | chr1_112270035-112270035_C_T  | 150R>Q  | Substitution | Nonsynonymous coding | 15% |
| MM18T | FAM214A  | family with sequence similarity 214, member A             | CCDS45263.1     | chr15_52877038-52877038_A_C   | 994F>C  | Substitution | Nonsynonymous coding | 13% |
| MM18T | FAM217A  | family with sequence similarity 217, member A             | CCDS4489.1      | chr6_4069827-4069827_C_A      | 210K>N  | Substitution | Nonsynonymous coding | 14% |
| MM18T | FAM217A  | family with sequence similarity 217, member A             | CCDS4489.1      | chr6_4069988-4069988_C_A      | 157D>Y  | Substitution | Nonsynonymous coding | 17% |
| MM18T | FAM220A  | family with sequence similarity 220, member A             | CCDS34599.1     | chr7_6370403-6370403_C_T      | 128R>Q  | Substitution | Nonsynonymous coding | 17% |

|       |           |                                                            |                 |                              |        |              |                      |     |
|-------|-----------|------------------------------------------------------------|-----------------|------------------------------|--------|--------------|----------------------|-----|
| MM18T | FAM222B   | family with sequence similarity 222, member B              | CCDS45637.1     | chr17_27086078-27086078_C_T  | 300R>H | Substitution | Nonsynonymous coding | 17% |
| MM18T | FAM43A    | family with sequence similarity 43, member A               | CCDS33923.1     | chr3_194408294-194408294_G_A | 247A>T | Substitution | Nonsynonymous coding | 11% |
| MM18T | FAM46C    | family with sequence similarity 46, member C               | CCDS896.1       | chrX_118165536-118165536_G_A | 16V>M  | Substitution | Nonsynonymous coding | 18% |
| MM18T | FAM46D    | family with sequence similarity 46, member D               | CCDS14446.1     | chrX_79698861-79698861_G_T   | 275E>X | Substitution | Nonsense             | 11% |
| MM18T | FAM47A    | family with sequence similarity 47, member A               | CCDS43926.1     | chrX_34149893-34149893_G_C   | 168T>S | Substitution | Nonsynonymous coding | 11% |
| MM18T | FAM47B    | family with sequence similarity 47, member B               | CCDS14236.1     | chrX_34962161-34962161_C_T   | 405R>C | Substitution | Nonsynonymous coding | 11% |
| MM18T | FAM49A    | family with sequence similarity 49, member A               | CCDS1688.1      | chr2_16743382-16743382_G_T   | 109S>Y | Substitution | Nonsynonymous coding | 17% |
| MM18T | FAM50B    | family with sequence similarity 50, member B               | CCDS4487.1      | chr6_3850173-3850173_C_T     | 43S>L  | Substitution | Nonsynonymous coding | 17% |
| MM18T | FAM50B    | family with sequence similarity 50, member B               | CCDS4487.1      | chr6_3850259-3850259_G_A     | 72D>N  | Substitution | Nonsynonymous coding | 11% |
| MM18T | FAM50B    | family with sequence similarity 50, member B               | CCDS4487.1      | chr6_3850655-3850655_C_T     | 204R>C | Substitution | Nonsynonymous coding | 16% |
| MM18T | FAM50B    | family with sequence similarity 50, member B               | CCDS4487.1      | chr6_3850859-3850859_G_A     | 272D>N | Substitution | Nonsynonymous coding | 17% |
| MM18T | FAM5C     | family with sequence similarity 5, member C                | CCDS1373.1      | chr1_190067408-190067408_G_A | 681R>W | Substitution | Nonsynonymous coding | 13% |
| MM18T | FAM65A    | family with sequence similarity 65, member A               | CCDS10840.1     | chr16_67578957-67578957_C_A  | 990L>I | Substitution | Nonsynonymous coding | 10% |
| MM18T | FAM65B    | family with sequence similarity 65, member B               | CCDS47383.1     | chr6_24843292-24843292_G_T   | 573S>Y | Substitution | Nonsynonymous coding | 13% |
| MM18T | FAM65C    | family with sequence similarity 65, member C               | CCDS13431.2     | chr20_49218967-49218967_A_G  | 430L>S | Substitution | Nonsynonymous coding | 17% |
| MM18T | FAM65C    | family with sequence similarity 65, member C               | CCDS13431.2     | chr20_49219011-49219011_C_A  | 415E>D | Substitution | Nonsynonymous coding | 16% |
| MM18T | FAM69A    | family with sequence similarity 69, member A               | CCDS44173.1     | chr1_93309649-93309649_G_A   | 193S>L | Substitution | Nonsynonymous coding | 16% |
| MM18T | FAM71F2   | family with sequence similarity 71, member F2              | CCDS47701.1     | chr7_128317750-128317750_C_A | 166F>L | Substitution | Nonsynonymous coding | 14% |
| MM18T | FAM73A    | family with sequence similarity 73, member A               | CCDS681.1       | chr1_78338713-78338713_T_G   | 530F>V | Substitution | Nonsynonymous coding | 16% |
| MM18T | FAM73A    | family with sequence similarity 73, member A               | CCDS681.1       | chr1_78279541-78279541_G_T   | 254E>X | Substitution | Nonsense             | 10% |
| MM18T | FAM78B    | family with sequence similarity 78, member B               | CCDS30931.1     | chr1_166039642-166039642_G_A | 208R>W | Substitution | Nonsynonymous coding | 14% |
| MM18T | FAM83B    | family with sequence similarity 83, member B               | CCDS34479.1     | chr6_54804802-54804802_T_G   | 345L>V | Substitution | Nonsynonymous coding | 13% |
| MM18T | FAM83B    | family with sequence similarity 83, member B               | CCDS34479.1     | chr6_54806648-54806648_G_A   | 960R>H | Substitution | Nonsynonymous coding | 11% |
| MM18T | FAM83G    | family with sequence similarity 83, member G               | CCDS42276.1     | chr17_18881907-18881907_C_T  | 358D>N | Substitution | Nonsynonymous coding | 21% |
| MM18T | FAM83G    | family with sequence similarity 83, member G               | CCDS42276.1     | chr17_18906868-18906868_C_A  | 163E>X | Substitution | Nonsense             | 20% |
| MM18T | FAM83H    | family with sequence similarity 83, member H               | CCDS6410.2      | chr8_144809270-144809270_C_A | 787E>D | Substitution | Nonsynonymous coding | 13% |
| MM18T | FAM90A27P | family with sequence similarity 90, member A27, pseudogene | ENST00000338885 | chr19_53788015-53788015_G_T  | 399D>Y | Substitution | Nonsynonymous coding | 26% |
| MM18T | FAN1      | FANCD2/FANCI-associated nuclease 1                         | CCDS32186.1     | chr15_31197567-31197567_G_A  | 234S>N | Substitution | Nonsynonymous coding | 15% |
| MM18T | FAN1      | FANCD2/FANCI-associated nuclease 1                         | CCDS32186.1     | chr15_31214444-31214444_G_A  | 687V>I | Substitution | Nonsynonymous coding | 13% |
| MM18T | FAN1      | FANCD2/FANCI-associated nuclease 1                         | CCDS32186.1     | chr15_31220856-31220856_T_G  | 863C>W | Substitution | Nonsynonymous coding | 14% |
| MM18T | FANCB     | Fanconi anemia, complementation group B                    | CCDS14161.1     | chrX_14862650-14862650_C_T   | 714E>K | Substitution | Nonsynonymous coding | 15% |
| MM18T | FANCG     | Fanconi anemia, complementation group G                    | CCDS6574.1      | chr9_35077266-35077266_C_T   | 214R>H | Substitution | Nonsynonymous coding | 10% |

|       |         |                                                                                |                 |                               |         |              |                      |     |
|-------|---------|--------------------------------------------------------------------------------|-----------------|-------------------------------|---------|--------------|----------------------|-----|
| MM18T | FANK1   | fibronectin type III and ankyrin repeat domains<br>1                           | CCDS31309.1     | chr10_127686023-127686023_G_A | 170V>M  | Substitution | Nonsynonymous coding | 15% |
| MM18T | FANK1   | fibronectin type III and ankyrin repeat domains<br>1                           | CCDS31309.1     | chr10_127697082-127697082_T_C | 271V>A  | Substitution | Nonsynonymous coding | 11% |
| MM18T | FARP1   | FERM, RhoGEF (ARHGEF) and pleckstrin<br>domain protein 1 (chondrocyte-derived) | ENST00000423063 | chr13_99088197-99088197_G_A   | 140R>H  | Substitution | Nonsynonymous coding | 16% |
| MM18T | FARP2   | FERM, RhoGEF and pleckstrin domain protein 2                                   | CCDS33424.1     | chr2_242430978-242430978_C_T  | 891R>W  | Substitution | Nonsynonymous coding | 13% |
| MM18T | FAS     | Fas (TNF receptor superfamily, member 6)                                       | CCDS57393.1     | chr10_90773973-90773973_A_C   | 258K>N  | Substitution | Nonsynonymous coding | 10% |
| MM18T | FASN    | fatty acid synthase                                                            | CCDS11801.1     | chr17_80040936-80040936_G_A   | 1874S>L | Substitution | Nonsynonymous coding | 18% |
| MM18T | FASTKD1 | FAST kinase domains 1                                                          | CCDS33318.1     | chr2_170403046-170403046_C_T  | 461W>X  | Substitution | Nonsense             | 14% |
| MM18T | FAT1    | FAT tumor suppressor homolog 1 (Drosophila)                                    | CCDS47177.1     | chr4_187540815-187540815_C_T  | 2309D>N | Substitution | Nonsynonymous coding | 14% |
| MM18T | FAT1    | FAT tumor suppressor homolog 1 (Drosophila)                                    | CCDS47177.1     | chr4_187542861-187542861_G_A  | 1627R>X | Substitution | Nonsense             | 15% |
| MM18T | FAT4    | FAT tumor suppressor homolog 4 (Drosophila)                                    | CCDS3732.3      | chr4_126336116-126336116_C_A  | 2000L>I | Substitution | Nonsynonymous coding | 12% |
| MM18T | FAT4    | FAT tumor suppressor homolog 4 (Drosophila)                                    | CCDS3732.3      | chr4_126370665-126370665_C_G  | 2832P>A | Substitution | Nonsynonymous coding | 12% |
| MM18T | FAT4    | FAT tumor suppressor homolog 4 (Drosophila)                                    | CCDS3732.3      | chr4_126370971-126370971_A_G  | 2934K>E | Substitution | Nonsynonymous coding | 15% |
| MM18T | FAT4    | FAT tumor suppressor homolog 4 (Drosophila)                                    | CCDS3732.3      | chr4_126371916-126371916_G_A  | 3249V>I | Substitution | Nonsynonymous coding | 16% |
| MM18T | FAT4    | FAT tumor suppressor homolog 4 (Drosophila)                                    | CCDS3732.3      | chr4_126242484-126242484_G_T  | 1640E>X | Substitution | Nonsense             | 14% |
| MM18T | FBLN5   | fibulin 5                                                                      | CCDS9898.1      | chr14_92336602-92336602_C_T   | 438R>Q  | Substitution | Nonsynonymous coding | 12% |
| MM18T | FBN1    | fibrillin 1                                                                    | CCDS32232.1     | chr15_48719821-48719821_T_C   | 2383T>A | Substitution | Nonsynonymous coding | 12% |
| MM18T | FBN1    | fibrillin 1                                                                    | CCDS32232.1     | chr15_48720629-48720629_T_C   | 2304N>S | Substitution | Nonsynonymous coding | 18% |
| MM18T | FBN1    | fibrillin 1                                                                    | CCDS32232.1     | chr15_48744864-48744864_T_C   | 1814N>D | Substitution | Nonsynonymous coding | 11% |
| MM18T | FBN1    | fibrillin 1                                                                    | CCDS32232.1     | chr15_48725084-48725084_C_A   | 2240E>X | Substitution | Nonsense             | 11% |
| MM18T | FBN2    | fibrillin 2                                                                    | CCDS34222.1     | chr5_127595376-127595376_G_T  | 2837S>Y | Substitution | Nonsynonymous coding | 11% |
| MM18T | FBN2    | fibrillin 2                                                                    | CCDS34222.1     | chr5_127638677-127638677_T_G  | 1969N>H | Substitution | Nonsynonymous coding | 11% |
| MM18T | FBN2    | fibrillin 2                                                                    | CCDS34222.1     | chr5_127648485-127648485_T_C  | 1574N>D | Substitution | Nonsynonymous coding | 11% |
| MM18T | FBN2    | fibrillin 2                                                                    | CCDS34222.1     | chr5_127714584-127714584_C_A  | ISV-1>  | Substitution | Splice site acceptor | 14% |
| MM18T | FBN3    | fibrillin 3                                                                    | CCDS12196.1     | chr19_8130856-8130856_G_A     | 2793P>S | Substitution | Nonsynonymous coding | 21% |
| MM18T | FBN3    | fibrillin 3                                                                    | CCDS12196.1     | chr19_8171067-8171067_C_T     | 1580V>I | Substitution | Nonsynonymous coding | 11% |
| MM18T | FBN3    | fibrillin 3                                                                    | CCDS12196.1     | chr19_8181675-8181675_C_T     | 1199E>K | Substitution | Nonsynonymous coding | 11% |
| MM18T | FBN3    | fibrillin 3                                                                    | CCDS12196.1     | chr19_8196582-8196582_C_T     | 616V>M  | Substitution | Nonsynonymous coding | 11% |
| MM18T | FBN3    | fibrillin 3                                                                    | CCDS12196.1     | chr19_8203090-8203090_C_T     | 379R>Q  | Substitution | Nonsynonymous coding | 13% |
| MM18T | FBXL18  | F-box and leucine-rich repeat protein 18                                       | CCDS43546.1     | chr7_5545141-5545141_C_A      | 47D>Y   | Substitution | Nonsynonymous coding | 14% |
| MM18T | FBXL2   | F-box and leucine-rich repeat protein 2                                        | CCDS2658.1      | chr3_33400820-33400820_G_T    | 56D>Y   | Substitution | Nonsynonymous coding | 11% |
| MM18T | FBXL4   | F-box and leucine-rich repeat protein 4                                        | CCDS5041.1      | chr6_99322311-99322311_C_A    | 570R>I  | Substitution | Nonsynonymous coding | 11% |
| MM18T | FBXL4   | F-box and leucine-rich repeat protein 4                                        | CCDS5041.1      | chr6_99323318-99323318_T_C    | 559T>A  | Substitution | Nonsynonymous coding | 15% |

|       |        |                                                                    |                 |                              |         |              |                      |     |
|-------|--------|--------------------------------------------------------------------|-----------------|------------------------------|---------|--------------|----------------------|-----|
| MM18T | FBXL6  | F-box and leucine-rich repeat protein 6                            | CCDS6422.1      | chr8_145579738-145579738_C_A | 454E>D  | Substitution | Nonsynonymous coding | 12% |
| MM18T | FBXL7  | F-box and leucine-rich repeat protein 7                            | NM_012304       | chr5_15936978-15936978_G_A   | 387E>K  | Substitution | Nonsynonymous coding | 18% |
| MM18T | FBXO15 | F-box protein 15                                                   | CCDS45884.1     | chr18_71796658-71796658_T_G  | 256K>T  | Substitution | Nonsynonymous coding | 21% |
| MM18T | FBXO18 | F-box protein, helicase, 18                                        | CCDS7073.1      | chr10_5950981-5950981_G_T    | 334E>X  | Substitution | Nonsense             | 11% |
| MM18T | FBXO24 | F-box protein 24                                                   | CCDS5698.1      | chr7_100192040-100192040_G_T | 276E>D  | Substitution | Nonsynonymous coding | 14% |
| MM18T | FBXO3  | F-box protein 3                                                    | CCDS7887.1      | chr11_33763483-33763483_G_A  | 463R>C  | Substitution | Nonsynonymous coding | 12% |
| MM18T | FBXO31 | F-box protein 31                                                   | CCDS32501.1     | chr16_87369014-87369014_C_A  | 298D>Y  | Substitution | Nonsynonymous coding | 22% |
| MM18T | FBXO40 | F-box protein 40                                                   | CCDS33835.1     | chr3_121341111-121341111_C_T | 279R>C  | Substitution | Nonsynonymous coding | 15% |
| MM18T | FBXO40 | F-box protein 40                                                   | CCDS33835.1     | chr3_121345592-121345592_T_G | 655N>K  | Substitution | Nonsynonymous coding | 14% |
| MM18T | FBXO8  | F-box protein 8                                                    | CCDS3820.1      | chr4_175160165-175160165_C_T | 251R>Q  | Substitution | Nonsynonymous coding | 16% |
| MM18T | FBXO9  | F-box protein 9                                                    | NM_012347       | chr6_52947347-52947347_C_A   | 205S>Y  | Substitution | Nonsynonymous coding | 14% |
| MM18T | FBXW5  | F-box and WD repeat domain containing 5                            | CCDS7014.1      | chr9_139836558-139836558_C_T | 346A>T  | Substitution | Nonsynonymous coding | 24% |
| MM18T | FBXW5  | F-box and WD repeat domain containing 5                            | ENST00000428398 | chr9_139837401-139837401_C_T | 126E>K  | Substitution | Nonsynonymous coding | 19% |
| MM18T | FBXW9  | F-box and WD repeat domain containing 9                            | ENST00000380339 | chr19_12800974-12800974_C_   | NA      | Deletion     | Frameshift           | 10% |
| MM18T | FCGBP  | Fc fragment of IgG binding protein                                 | CCDS12546.1     | chr19_40433611-40433611_C_T  | 220V>M  | Substitution | Nonsynonymous coding | 14% |
| MM18T | FCHO2  | FCH domain only 2                                                  | CCDS47230.1     | chr5_72251927-72251927_G_C   | 2V>L    | Substitution | Nonsynonymous coding | 15% |
| MM18T | FCHSD1 | FCH and double SH3 domains 1                                       | CCDS47295.1     | chr5_141026210-141026210_C_T | 335R>Q  | Substitution | Nonsynonymous coding | 18% |
| MM18T | FCHSD1 | FCH and double SH3 domains 1                                       | CCDS47295.1     | chr5_141027015-141027015_C_T | 260A>T  | Substitution | Nonsynonymous coding | 12% |
| MM18T | FCN2   | ficolin (collagen/fibrinogen domain containing lectin) 2 (hucolin) | CCDS6983.1      | chr9_13777654-13777654_G_A   | 157R>Q  | Substitution | Nonsynonymous coding | 18% |
| MM18T | FCRL2  | Fc receptor-like 2                                                 | CCDS1168.1      | chr1_157716531-157716531_A_G | 508S>P  | Substitution | Nonsynonymous coding | 14% |
| MM18T | FCRL5  | Fc receptor-like 5                                                 | ENST00000368189 | chr1_157504329-157504329_C_T | 586A>T  | Substitution | Nonsynonymous coding | 12% |
| MM18T | FDCSP  | follicular dendritic cell secreted protein                         | CCDS3537.1      | chr4_71099861-71099861_T_C   | 72I>T   | Substitution | Nonsynonymous coding | 10% |
| MM18T | FDXR   | ferredoxin reductase                                               | CCDS11707.1     | chr17_72860470-72860470_C_A  | ISV-1>  | Substitution | Splice site acceptor | 12% |
| MM18T | FER1L6 | fer-1-like 6 (C. elegans)                                          | CCDS43767.1     | chr8_125033834-125033834_G_T | 686K>N  | Substitution | Nonsynonymous coding | 11% |
| MM18T | FER1L6 | fer-1-like 6 (C. elegans)                                          | CCDS43767.1     | chr8_125131868-125131868_C_T | 1804S>L | Substitution | Nonsynonymous coding | 11% |
| MM18T | FER1L6 | fer-1-like 6 (C. elegans)                                          | CCDS43767.1     | chr8_125025686-125025686_G_T | 613E>X  | Substitution | Nonsense             | 11% |
| MM18T | FGA    | fibrinogen alpha chain                                             | CCDS3787.1      | chr4_155507950-155507950_C_A | 211D>Y  | Substitution | Nonsynonymous coding | 10% |
| MM18T | FGB    | fibrinogen beta chain                                              | CCDS3786.1      | chr4_155488925-155488925_G_A | 224R>H  | Substitution | Nonsynonymous coding | 13% |
| MM18T | FGD1   | FYVE, RhoGEF and PH domain containing 1                            | CCDS14359.1     | chrX_54476152-54476152_C_A   | 696E>D  | Substitution | Nonsynonymous coding | 13% |
| MM18T | FGD1   | FYVE, RhoGEF and PH domain containing 1                            | CCDS14359.1     | chrX_54481929-54481929_C_T   | 656R>Q  | Substitution | Nonsynonymous coding | 17% |
| MM18T | FGD2   | FYVE, RhoGEF and PH domain containing 2                            | CCDS4829.1      | chr6_36981780-36981780_C_A   | 243L>M  | Substitution | Nonsynonymous coding | 12% |
| MM18T | FGD6   | FYVE, RhoGEF and PH domain containing 6                            | CCDS31878.1     | chr12_95604042-95604042_C_A  | 340E>X  | Substitution | Nonsense             | 11% |

|       |        |                                                                        |             |                              |         |              |                      |     |
|-------|--------|------------------------------------------------------------------------|-------------|------------------------------|---------|--------------|----------------------|-----|
| MM18T | FGF23  | fibroblast growth factor 23                                            | CCDS8526.1  | chr12_4479719-4479719_C_A    | 182E>D  | Substitution | Nonsynonymous coding | 18% |
| MM18T | FGF23  | fibroblast growth factor 23                                            | CCDS8526.1  | chr12_4488622-4488622_A_G    | 43Y>H   | Substitution | Nonsynonymous coding | 13% |
| MM18T | FGF4   | fibroblast growth factor 4                                             | CCDS1894.1  | chr11_69588121-69588121_C_G  | 193V>L  | Substitution | Nonsynonymous coding | 14% |
| MM18T | FGF6   | fibroblast growth factor 6                                             | CCDS8527.1  | chr12_4554553-4554553_G_A    | 62R>C   | Substitution | Nonsynonymous coding | 14% |
| MM18T | FGFBP1 | fibroblast growth factor binding protein 1                             | CCDS3418.1  | chr4_15937929-15937929_C_A   | 109E>D  | Substitution | Nonsynonymous coding | 13% |
| MM18T | FGFBP2 | fibroblast growth factor binding protein 2                             | CCDS3419.1  | chr4_15964629-15964629_A_C   | 42S>A   | Substitution | Nonsynonymous coding | 12% |
| MM18T | FGFR1  | fibroblast growth factor receptor 1                                    | CCDS6107.2  | chr8_38287380-38287380_C_T   | 60D>N   | Substitution | Nonsynonymous coding | 13% |
| MM18T | FGGY   | FGGY carbohydrate kinase domain containing                             | CCDS44155.1 | chr1_59811930-59811930_C_T   | 109R>X  | Substitution | Nonsense             | 10% |
| MM18T | FHL3   | four and a half LIM domains 3                                          | CCDS30678.1 | chr1_38465051-38465051_C_T   | 12E>K   | Substitution | Nonsynonymous coding | 16% |
| MM18T | FIG4   | FIG4 homolog, SAC1 lipid phosphatase domain containing (S. cerevisiae) | CCDS5078.1  | chr6_110056444-110056444_C_T | 197R>C  | Substitution | Nonsynonymous coding | 14% |
| MM18T | FIG4   | FIG4 homolog, SAC1 lipid phosphatase domain containing (S. cerevisiae) | CCDS5078.1  | chr6_110112754-110112754_G_T | 786D>Y  | Substitution | Nonsynonymous coding | 25% |
| MM18T | FIGN   | fidgetin                                                               | CCDS2221.2  | chr2_164467481-164467481_G_  | NA      | Deletion     | Frameshift           | 12% |
| MM18T | FILIP1 | filamin A interacting protein 1                                        | CCDS4984.1  | chr6_76022271-76022271_G_A   | 1093R>X | Substitution | Nonsense             | 10% |
| MM18T | FIZ1   | FLT3-interacting zinc finger 1                                         | CCDS12928.1 | chr19_56104679-56104679_C_T  | 210D>N  | Substitution | Nonsynonymous coding | 25% |
| MM18T | FKBP10 | FK506 binding protein 10, 65 kDa                                       | CCDS11409.1 | chr17_39973407-39973407_C_T  | 115R>X  | Substitution | Nonsense             | 17% |
| MM18T | FKBP15 | FK506 binding protein 15, 133kDa                                       | CCDS48007.1 | chr9_115973816-115973816_T_G | 37E>A   | Substitution | Nonsynonymous coding | 24% |
| MM18T | FKBP15 | FK506 binding protein 15, 133kDa                                       | CCDS48007.1 | chr9_115936854-115936854_C_A | 745E>X  | Substitution | Nonsense             | 19% |
| MM18T | FKBP5  | FK506 binding protein 5                                                | CCDS4808.1  | chr6_35547913-35547913_G_A   | 309S>L  | Substitution | Nonsynonymous coding | 12% |
| MM18T | FKTN   | fukutin                                                                | CCDS6766.1  | chr9_108380305-108380305_G_T | 326D>Y  | Substitution | Nonsynonymous coding | 13% |
| MM18T | FLG2   | filaggrin family member 2                                              | CCDS30861.1 | chr1_152326304-152326304_C_T | 1320D>N | Substitution | Nonsynonymous coding | 20% |
| MM18T | FLNA   | filamin A, alpha                                                       | CCDS48194.1 | chrX_153586916-153586916_C_T | 1499V>M | Substitution | Nonsynonymous coding | 10% |
| MM18T | FLNA   | filamin A, alpha                                                       | CCDS48194.1 | chrX_153593034-153593034_C_T | 628D>N  | Substitution | Nonsynonymous coding | 13% |
| MM18T | FLNA   | filamin A, alpha                                                       | CCDS48194.1 | chrX_153593729-153593729_C_T | 519V>M  | Substitution | Nonsynonymous coding | 12% |
| MM18T | FLNA   | filamin A, alpha                                                       | CCDS48194.1 | chrX_153596077-153596077_C_T | 218A>T  | Substitution | Nonsynonymous coding | 16% |
| MM18T | FLNB   | filamin B, beta                                                        | CCDS2885.1  | chr3_58107165-58107165_G_A   | 1021D>N | Substitution | Nonsynonymous coding | 15% |
| MM18T | FLNC   | filamin C, gamma                                                       | CCDS43644.1 | chr7_128478708-128478708_G_A | 421R>Q  | Substitution | Nonsynonymous coding | 12% |
| MM18T | FLNC   | filamin C, gamma                                                       | CCDS43644.1 | chr7_128485233-128485233_C_A | 1238F>L | Substitution | Nonsynonymous coding | 12% |
| MM18T | FLNC   | filamin C, gamma                                                       | CCDS43644.1 | chr7_128494532-128494532_G_T | 2265E>X | Substitution | Nonsense             | 15% |
| MM18T | FLOT1  | flotillin 1                                                            | CCDS4688.1  | chr6_30708291-30708291_C_A   | 184K>N  | Substitution | Nonsynonymous coding | 12% |
| MM18T | FLT1   | fms-related tyrosine kinase 1                                          | CCDS9330.1  | chr13_29001309-29001309_G_A  | 475H>Y  | Substitution | Nonsynonymous coding | 14% |
| MM18T | FLT3   | fms-related tyrosine kinase 3                                          | CCDS31953.1 | chr13_28588626-28588626_G_A  | 941S>L  | Substitution | Nonsynonymous coding | 12% |
| MM18T | FLT3   | fms-related tyrosine kinase 3                                          | CCDS31953.1 | chr13_28601353-28601353_G_T  | 693Y>X  | Substitution | Nonsense             | 20% |

|       |         |                                                                     |                 |                               |         |              |                      |     |
|-------|---------|---------------------------------------------------------------------|-----------------|-------------------------------|---------|--------------|----------------------|-----|
| MM18T | FLT4    | fms-related tyrosine kinase 4                                       | CCDS4457.1      | chr5_180038342-180038342_G_T  | 1225S>R | Substitution | Nonsynonymous coding | 16% |
| MM18T | FLVCR2  | feline leukemia virus subgroup C cellular receptor family, member 2 | CCDS9844.1      | chr14_76088432-76088432_C_T   | 227A>V  | Substitution | Nonsynonymous coding | 12% |
| MM18T | FLYWCH2 | FLYWCH family member 2                                              | CCDS10482.1     | chr16_2946562-2946562_A_C     | 38K>Q   | Substitution | Nonsynonymous coding | 19% |
| MM18T | FMNL3   | formin-like 3                                                       | CCDS44874.1     | chr12_50047515-50047515_A_G   | 405V>A  | Substitution | Nonsynonymous coding | 10% |
| MM18T | FMNL3   | formin-like 3                                                       | CCDS44874.1     | chr12_50045070-50045070_G_A   | 560R>X  | Substitution | Nonsense             | 14% |
| MM18T | FMO2    | flavin containing monooxygenase 2 (non-functional)                  | CCDS1293.1      | chr1_171168548-171168548_A_G  | 183E>G  | Substitution | Nonsynonymous coding | 18% |
| MM18T | FMO2    | flavin containing monooxygenase 2 (non-functional)                  | CCDS1293.1      | chr1_171173071-171173071_A_G  | 232D>G  | Substitution | Nonsynonymous coding | 12% |
| MM18T | FMO2    | flavin containing monooxygenase 2 (non-functional)                  | CCDS1293.1      | chr1_171174628-171174628_G_T  | 346E>D  | Substitution | Nonsynonymous coding | 13% |
| MM18T | FMO2    | flavin containing monooxygenase 2 (non-functional)                  | CCDS1293.1      | chr1_171178061-171178061_G_T  | 462R>I  | Substitution | Nonsynonymous coding | 16% |
| MM18T | FMO3    | flavin containing monooxygenase 3                                   | CCDS1292.1      | chr1_171086356-171086356_C_T  | 458A>V  | Substitution | Nonsynonymous coding | 12% |
| MM18T | FMO4    | flavin containing monooxygenase 4                                   | CCDS1295.1      | chr1_171303686-171303686_G_T  | 322D>Y  | Substitution | Nonsynonymous coding | 12% |
| MM18T | FMO5    | flavin containing monooxygenase 5                                   | CCDS926.1       | chr1_146673043-146673043_G_T  | 292R>S  | Substitution | Nonsynonymous coding | 12% |
| MM18T | FMO6P   | flavin containing monooxygenase 6 pseudogene                        | ENST00000236166 | chr1_171130350-171130350_C_T  | 479R>X  | Substitution | Nonsense             | 10% |
| MM18T | FMR1    | fragile X mental retardation 1                                      | CCDS14682.1     | chrX_146993735-146993735_G_A  | 13G>D   | Substitution | Nonsynonymous coding | 13% |
| MM18T | FMR1    | fragile X mental retardation 1                                      | CCDS14682.1     | chrX_147027083-147027083_C_T  | 562R>C  | Substitution | Nonsynonymous coding | 12% |
| MM18T | FN1     | fibronectin 1                                                       | CCDS42814.1     | chr2_216245565-216245565_C_A  | 1801E>D | Substitution | Nonsynonymous coding | 16% |
| MM18T | FN1     | fibronectin 1                                                       | CCDS42814.1     | chr2_216262532-216262532_C_T  | 1130E>K | Substitution | Nonsynonymous coding | 10% |
| MM18T | FNBP1L  | formin binding protein 1-like                                       | NM_001164473    | chr1_93913865-93913865_G_T    | ISV+3>  | Substitution | Splice site donor    | 13% |
| MM18T | FNDC1   | fibronectin type III domain containing 1                            | CCDS47512.1     | chr6_159636168-159636168_G_A  | 218E>K  | Substitution | Nonsynonymous coding | 13% |
| MM18T | FNDC3B  | fibronectin type III domain containing 3B                           | CCDS3217.1      | chr3_171965425-171965425_C_A  | 123L>I  | Substitution | Nonsynonymous coding | 14% |
| MM18T | FNDC7   | fibronectin type III domain containing 7                            | CCDS44185.1     | chr1_109268610-109268610_A_G  | 365I>M  | Substitution | Nonsynonymous coding | 13% |
| MM18T | FNDC9   | fibronectin type III domain containing 9                            | CCDS4337.1      | chr5_156770192-156770192_G_A  | 118A>V  | Substitution | Nonsynonymous coding | 12% |
| MM18T | FNIP2   | folliculin interacting protein 2                                    | CCDS47155.1     | chr4_159772582-159772582_A_C  | 279E>D  | Substitution | Nonsynonymous coding | 12% |
| MM18T | FNTA    | farnesyltransferase, CAAX box, alpha                                | CCDS6140.1      | chr8_42919249-42919249_G_T    | 98D>Y   | Substitution | Nonsynonymous coding | 13% |
| MM18T | FOCAD   | focadhesin                                                          | CCDS34993.1     | chr9_20740315-20740315_A_C    | 123N>T  | Substitution | Nonsynonymous coding | 11% |
| MM18T | FOCAD   | focadhesin                                                          | CCDS34993.1     | chr9_20881927-20881927_G_A    | 792G>E  | Substitution | Nonsynonymous coding | 13% |
| MM18T | FOCAD   | focadhesin                                                          | CCDS34993.1     | chr9_20946794-20946794_G_A    | 1217R>Q | Substitution | Nonsynonymous coding | 15% |
| MM18T | FOXA2   | forkhead box A2                                                     | CCDS46585.1     | chr20_22563405-22563405_G_A   | 159R>C  | Substitution | Nonsynonymous coding | 15% |
| MM18T | FOXC2   | forkhead box C2 (MFH-1, mesenchyme forkhead 1)                      | CCDS10958.1     | chr16_86601648-86601648_C_T   | 236A>V  | Substitution | Nonsynonymous coding | 18% |
| MM18T | FOXD2   | forkhead box D2                                                     | CCDS30708.1     | chr1_47905125-47905125_G_A    | 440A>T  | Substitution | Nonsynonymous coding | 16% |
| MM18T | FOXG1   | forkhead box G1                                                     | CCDS9636.1      | chr14_29237780-29237780_C_T   | 432T>M  | Substitution | Nonsynonymous coding | 14% |
| MM18T | FOXI2   | forkhead box I2                                                     | CCDS7655.2      | chr10_129535602-129535602_C_T | 22A>V   | Substitution | Nonsynonymous coding | 14% |

|       |        |                                                        |                 |                               |         |              |                      |     |
|-------|--------|--------------------------------------------------------|-----------------|-------------------------------|---------|--------------|----------------------|-----|
| MM18T | FOXI2  | forkhead box I2                                        | CCDS7655.2      | chr10_129535958-129535958_C_T | 141R>C  | Substitution | Nonsynonymous coding | 17% |
| MM18T | FOXK2  | forkhead box K2                                        | CCDS11813.1     | chr17_80559319-80559319_G_C   | 643A>P  | Substitution | Nonsynonymous coding | 18% |
| MM18T | FOXN1  | forkhead box N1                                        | CCDS11232.1     | chr17_26851872-26851872_G_A   | 159E>K  | Substitution | Nonsynonymous coding | 15% |
| MM18T | FOXN3  | forkhead box N3                                        | CCDS41977.1     | chr14_89878298-89878298_C_T   | 175V>M  | Substitution | Nonsynonymous coding | 13% |
| MM18T | FOXN3  | forkhead box N3                                        | CCDS41977.1     | chr14_89878706-89878706_C_A   | 39D>Y   | Substitution | Nonsynonymous coding | 11% |
| MM18T | FOXQ1  | forkhead box Q1                                        | CCDS4471.1      | chr6_1313022-1313022_C_T      | 28A>V   | Substitution | Nonsynonymous coding | 31% |
| MM18T | FPR3   | formyl peptide receptor 3                              | CCDS12841.1     | chr19_52327317-52327317_G_T   | 106D>Y  | Substitution | Nonsynonymous coding | 17% |
| MM18T | FRAS1  | Fraser syndrome 1                                      | NM_025074       | chr4_79295384-79295384_C_T    | 1044H>Y | Substitution | Nonsynonymous coding | 10% |
| MM18T | FRAS1  | Fraser syndrome 1                                      | NM_025074       | chr4_79340177-79340177_G_T    | 1500K>N | Substitution | Nonsynonymous coding | 12% |
| MM18T | FREM1  | FRAS1 related extracellular matrix 1                   | ENST00000427623 | chr9_14774107-14774107_T_C    | 18I>V   | Substitution | Nonsynonymous coding | 14% |
| MM18T | FREM2  | FRAS1 related extracellular matrix protein 2           | CCDS31960.1     | chr13_39264243-39264243_G_T   | 921R>I  | Substitution | Nonsynonymous coding | 15% |
| MM18T | FRK    | fyn-related kinase                                     | CCDS5103.1      | chr6_116289807-116289807_C_T  | 188E>K  | Substitution | Nonsynonymous coding | 11% |
| MM18T | FRMD1  | FERM domain containing 1                               | CCDS5306.1      | chr6_168457824-168457824_C_T  | 535A>T  | Substitution | Nonsynonymous coding | 19% |
| MM18T | FRMD3  | FERM domain containing 3                               | CCDS43840.1     | chr9_86153029-86153029_C_T    | 40D>N   | Substitution | Nonsynonymous coding | 23% |
| MM18T | FRMD4A | FERM domain containing 4A                              | CCDS7101.1      | chr10_13900882-13900882_G_T   | 26L>I   | Substitution | Nonsynonymous coding | 14% |
| MM18T | FRMD5  | FERM domain containing 5                               | CCDS10107.2     | chr15_44177930-44177930_C_T   | 303R>H  | Substitution | Nonsynonymous coding | 11% |
| MM18T | FRMD7  | FERM domain containing 7                               | CCDS35397.1     | chrX_131212300-131212300_A_C  | 582I>S  | Substitution | Nonsynonymous coding | 10% |
| MM18T | FRMD8  | FERM domain containing 8                               | CCDS8102.1      | chr11_65167316-65167316_G_A   | 305D>N  | Substitution | Nonsynonymous coding | 14% |
| MM18T | FRMPD1 | FERM and PDZ domain containing 1                       | CCDS6612.1      | chr9_37740537-37740537_A_C    | 671K>T  | Substitution | Nonsynonymous coding | 12% |
| MM18T | FRMPD2 | FERM and PDZ domain containing 2                       | CCDS31195.1     | chr10_49409359-49409359_C_A   | 622K>N  | Substitution | Nonsynonymous coding | 16% |
| MM18T | FRMPD3 | FERM and PDZ domain containing 3                       | ENST00000276185 | chrX_106793372-106793372_C_T  | 199R>W  | Substitution | Nonsynonymous coding | 11% |
| MM18T | FRMPD3 | FERM and PDZ domain containing 3                       | ENST00000276185 | chrX_106797640-106797640_G_T  | 256G>V  | Substitution | Nonsynonymous coding | 10% |
| MM18T | FRMPD3 | FERM and PDZ domain containing 3                       | ENST00000276185 | chrX_106845489-106845489_C_T  | 1440S>L | Substitution | Nonsynonymous coding | 14% |
| MM18T | FRY    | furry homolog (Drosophila)                             | CCDS41875.1     | chr13_32868634-32868634_G_A   | 2904A>T | Substitution | Nonsynonymous coding | 12% |
| MM18T | FRY    | furry homolog (Drosophila)                             | CCDS41875.1     | chr13_32747654-32747654_C_T   | 768R>X  | Substitution | Nonsense             | 13% |
| MM18T | FRYL   | FRY-like                                               | CCDS43227.1     | chr4_48501515-48501515_G_T    | 2989S>Y | Substitution | Nonsynonymous coding | 15% |
| MM18T | FSD1L  | fibronectin type III and SPRY domain containing 1-like | CCDS47999.1     | chr9_108230549-108230549_G_A  | 95E>K   | Substitution | Nonsynonymous coding | 13% |
| MM18T | FSD2   | fibronectin type III and SPRY domain containing 2      | CCDS45332.1     | chr15_83451730-83451730_C_A   | 261E>D  | Substitution | Nonsynonymous coding | 16% |
| MM18T | FSHR   | follicle stimulating hormone receptor                  | CCDS1843.1      | chr2_49190123-49190123_G_T    | 613L>M  | Substitution | Nonsynonymous coding | 12% |
| MM18T | FSIP2  | fibrous sheath interacting protein 2                   | ENST00000424728 | chr2_186657187-186657187_C_A  | 1775S>Y | Substitution | Nonsynonymous coding | 12% |
| MM18T | FSIP2  | fibrous sheath interacting protein 2                   | ENST00000424728 | chr2_186678428-186678428_G_T  | 6662D>Y | Substitution | Nonsynonymous coding | 11% |
| MM18T | FSIP2  | fibrous sheath interacting protein 2                   | ENST00000424728 | chr2_186664891-186664891_G_T  | 3620E>X | Substitution | Nonsense             | 19% |

|       |           |                                                       |             |                              |        |              |                      |     |
|-------|-----------|-------------------------------------------------------|-------------|------------------------------|--------|--------------|----------------------|-----|
| MM18T | FTMT      | ferritin mitochondrial                                | CCDS4128.1  | chr5_121187702-121187702_C_T | 15S>L  | Substitution | Nonsynonymous coding | 19% |
| MM18T | FUT5      | fucosyltransferase 5 (alpha (1,3) fucosyltransferase) | CCDS12154.1 | chr19_5867337-5867337_G_A    | 134L>F | Substitution | Nonsynonymous coding | 20% |
| MM18T | FUT5      | fucosyltransferase 5 (alpha (1,3) fucosyltransferase) | CCDS12154.1 | chr19_5867636-5867636_A_C    | 34L>R  | Substitution | Nonsynonymous coding | 11% |
| MM18T | FXR1      | fragile X mental retardation, autosomal homolog 1     | CCDS3238.1  | chr3_180666179-180666179_A_C | 105E>D | Substitution | Nonsynonymous coding | 13% |
| MM18T | FXYD5     | FXYD domain containing ion transport regulator 5      | CCDS12447.1 | chr19_35648328-35648328_G_T  | 22Q>H  | Substitution | Nonsynonymous coding | 22% |
| MM18T | FZD1      | frizzled family receptor 1                            | CCDS5620.1  | chr7_90895087-90895087_G_A   | 298A>T | Substitution | Nonsynonymous coding | 21% |
| MM18T | FZD7      | frizzled family receptor 7                            | CCDS2351.1  | chr2_202899867-202899867_C_T | 166S>L | Substitution | Nonsynonymous coding | 19% |
| MM18T | FZD7      | frizzled family receptor 7                            | CCDS2351.1  | chr2_202900170-202900170_C_T | 267S>L | Substitution | Nonsynonymous coding | 15% |
| MM18T | FZD7      | frizzled family receptor 7                            | CCDS2351.1  | chr2_202900248-202900248_C_T | 293S>L | Substitution | Nonsynonymous coding | 11% |
| MM18T | GAA       | glucosidase, alpha; acid                              | CCDS32760.1 | chr17_78078455-78078455_G_A  | 24A>T  | Substitution | Nonsynonymous coding | 13% |
| MM18T | GAB4      | GRB2-associated binding protein family, member 4      | CCDS42976.1 | chr22_17450953-17450953_G_A  | 273L>F | Substitution | Nonsynonymous coding | 13% |
| MM18T | GABARAPL1 | GABA(A) receptor-associated protein like 1            | CCDS8620.1  | chr12_10365772-10365772_A_C  | 15K>T  | Substitution | Nonsynonymous coding | 10% |
| MM18T | GABBR1    | gamma-aminobutyric acid (GABA) B receptor, 1          | CCDS4663.1  | chr6_29580340-29580340_C_T   | 540E>K | Substitution | Nonsynonymous coding | 17% |
| MM18T | GABBR1    | gamma-aminobutyric acid (GABA) B receptor, 1          | CCDS4663.1  | chr6_29598310-29598310_C_T   | 134D>N | Substitution | Nonsynonymous coding | 18% |
| MM18T | GABRA5    | gamma-aminobutyric acid (GABA) A receptor, alpha 5    | CCDS45194.1 | chr15_27128377-27128377_A_C  | 91E>D  | Substitution | Nonsynonymous coding | 20% |
| MM18T | GABRA5    | gamma-aminobutyric acid (GABA) A receptor, alpha 5    | CCDS45194.1 | chr15_27128557-27128557_G_A  | 117R>H | Substitution | Nonsynonymous coding | 16% |
| MM18T | GABRA6    | gamma-aminobutyric acid (GABA) A receptor, alpha 6    | CCDS4356.1  | chr5_161116097-161116097_A_C | 123K>T | Substitution | Nonsynonymous coding | 18% |
| MM18T | GABRA6    | gamma-aminobutyric acid (GABA) A receptor, alpha 6    | CCDS4356.1  | chr5_161128729-161128729_G_A | 438V>I | Substitution | Nonsynonymous coding | 18% |
| MM18T | GABRB3    | gamma-aminobutyric acid (GABA) A receptor, beta 3     | CCDS10018.1 | chr15_26825489-26825489_G_A  | 220S>L | Substitution | Nonsynonymous coding | 12% |
| MM18T | GABRE     | gamma-aminobutyric acid (GABA) A receptor, epsilon    | CCDS14703.1 | chrX_151124211-151124211_C_A | 302K>N | Substitution | Nonsynonymous coding | 13% |
| MM18T | GABRG3    | gamma-aminobutyric acid (GABA) A receptor, gamma 3    | CCDS45195.1 | chr15_27222246-27222246_C_A  | 51L>I  | Substitution | Nonsynonymous coding | 17% |
| MM18T | GABRR2    | gamma-aminobutyric acid (GABA) A receptor, rho 2      | CCDS5020.2  | chr6_89978805-89978805_G_A   | 171S>L | Substitution | Nonsynonymous coding | 14% |
| MM18T | GAD1      | glutamate decarboxylase 1 (brain, 67kDa)              | CCDS2239.1  | chr2_171704300-171704300_G_A | 373D>N | Substitution | Nonsynonymous coding | 10% |
| MM18T | GADL1     | glutamate decarboxylase-like 1                        | CCDS2649.2  | chr3_30898594-30898594_G_T   | 84L>I  | Substitution | Nonsynonymous coding | 13% |
| MM18T | GAL3ST2   | galactose-3-O-sulfotransferase 2                      | CCDS33427.1 | chr2_242738483-242738483_C_A | 11Y>X  | Substitution | Nonsense             | 12% |
| MM18T | GALNT1    | UDP-N-acetyl-alpha-D-galactosamine:polypeptide N-     | CCDS11915.1 | chr18_33289705-33289705_C_T  | 551R>X | Substitution | Nonsense             | 13% |
| MM18T | GALNT12   | UDP-N-acetyl-alpha-D-galactosamine:polypeptide N-     | CCDS6737.1  | chr9_101599280-101599280_A_C | 354E>D | Substitution | Nonsynonymous coding | 20% |
| MM18T | GALNT13   | UDP-N-acetyl-alpha-D-galactosamine:polypeptide N-     | CCDS2199.1  | chr2_155099289-155099289_C_A | 186S>Y | Substitution | Nonsynonymous coding | 12% |
| MM18T | GALNT14   | UDP-N-acetyl-alpha-D-galactosamine:polypeptide N-     | CCDS1773.2  | chr2_31147655-31147655_G_A   | 396R>C | Substitution | Nonsynonymous coding | 19% |
| MM18T | GALNT14   | UDP-N-acetyl-alpha-D-galactosamine:polypeptide N-     | CCDS1773.2  | chr2_31215789-31215789_C_T   | 72D>N  | Substitution | Nonsynonymous coding | 14% |
| MM18T | GALNT15   | UDP-N-acetyl-alpha-D-galactosamine:polypeptide N-     | CCDS33711.1 | chr3_16216838-16216838_C_A   | 60D>E  | Substitution | Nonsynonymous coding | 14% |
| MM18T | GALNT15   | UDP-N-acetyl-alpha-D-galactosamine:polypeptide N-     | CCDS33711.1 | chr3_16252692-16252692_G_A   | 381A>T | Substitution | Nonsynonymous coding | 11% |



|       |         |                                                                           |                 |                               |         |              |                      |     |
|-------|---------|---------------------------------------------------------------------------|-----------------|-------------------------------|---------|--------------|----------------------|-----|
| MM18T | GALNT16 | UDP-N-acetyl-alpha-D-galactosamine:polypeptide N-                         | CCDS32107.1     | chr14_69727086-69727086_G_A   | 27D>N   | Substitution | Nonsynonymous coding | 16% |
| MM18T | GALNT16 | UDP-N-acetyl-alpha-D-galactosamine:polypeptide N-                         | CCDS32107.1     | chr14_69800310-69800310_G_T   | 320E>D  | Substitution | Nonsynonymous coding | 13% |
| MM18T | GALNT2  | UDP-N-acetyl-alpha-D-galactosamine:polypeptide N-                         | CCDS1582.1      | chr1_230379060-230379060_C_T  | 206R>C  | Substitution | Nonsynonymous coding | 11% |
| MM18T | GALNT2  | UDP-N-acetyl-alpha-D-galactosamine:polypeptide N-                         | CCDS1582.1      | chr1_230415167-230415167_C_T  | 560S>L  | Substitution | Nonsynonymous coding | 21% |
| MM18T | GALNT5  | UDP-N-acetyl-alpha-D-galactosamine:polypeptide N-                         | CCDS2203.1      | chr2_158156106-158156106__T   | NA      | Insertion    | Frameshift           | 13% |
| MM18T | GALNT8  | UDP-N-acetyl-alpha-D-galactosamine:polypeptide N-                         | CCDS8533.1      | chr12_4835988-4835988_G_T     | 168D>Y  | Substitution | Nonsynonymous coding | 15% |
| MM18T | GALNT9  | UDP-N-acetyl-alpha-D-galactosamine:polypeptide N-                         | NM_001122636    | chr12_132837630-132837630_C_T | 222R>Q  | Substitution | Nonsynonymous coding | 12% |
| MM18T | GAPT    | GRB2-binding adaptor protein, transmembrane                               | CCDS3975.1      | chr5_57790482-57790482_G_A    | 40R>Q   | Substitution | Nonsynonymous coding | 12% |
| MM18T | GAREML  | GRB2 associated, regulator of MAPK1-like                                  | NM_001168241    | chr2_26410191-26410191_G_A    | 564E>K  | Substitution | Nonsynonymous coding | 18% |
| MM18T | GAS6    | growth arrest-specific 6                                                  | ENST00000355761 | chr13_114549961-114549961_G_T | 32F>L   | Substitution | Nonsynonymous coding | 16% |
| MM18T | GATA5   | GATA binding protein 5                                                    | CCDS13499.1     | chr20_61050573-61050573_T_C   | 2Y>C    | Substitution | Nonsynonymous coding | 15% |
| MM18T | GATA6   | GATA binding protein 6                                                    | CCDS11872.1     | chr18_19751460-19751460_G_A   | 119D>N  | Substitution | Nonsynonymous coding | 26% |
| MM18T | GATAD2A | GATA zinc finger domain containing 2A                                     | CCDS12402.2     | chr19_19606584-19606584_G_A   | 216G>S  | Substitution | Nonsynonymous coding | 15% |
| MM18T | GATM    | glycine amidinotransferase (L-arginine:glycine amidinotransferase)        | CCDS10122.1     | chr15_45668876-45668876_C_T   | 71E>K   | Substitution | Nonsynonymous coding | 15% |
| MM18T | GBA     | glucosidase, beta, acid                                                   | CCDS1102.1      | chr1_155208000-155208000_G_A  | 229A>V  | Substitution | Nonsynonymous coding | 12% |
| MM18T | GBP6    | guanylate binding protein family, member 6                                | CCDS723.1       | chr1_89848379-89848379_G_A    | 437E>K  | Substitution | Nonsynonymous coding | 13% |
| MM18T | GCC1    | GRIP and coiled-coil domain containing 1                                  | CCDS5796.1      | chr7_127222624-127222624_C_T  | 591R>H  | Substitution | Nonsynonymous coding | 15% |
| MM18T | GCC2    | GRIP and coiled-coil domain containing 2                                  | CCDS33268.1     | chr2_109092005-109092005_G_A  | 959E>K  | Substitution | Nonsynonymous coding | 14% |
| MM18T | GCH1    | GTP cyclohydrolase 1                                                      | CCDS9720.1      | chr14_55369342-55369342__A    | NA      | Insertion    | Frameshift           | 14% |
| MM18T | GCK     | glucokinase (hexokinase 4)                                                | CCDS5480.1      | chr7_44187310-44187310_C_T    | 269E>K  | Substitution | Nonsynonymous coding | 14% |
| MM18T | GCN1L1  | GCN1 general control of amino-acid synthesis 1-like 1 (yeast)             | CCDS41847.1     | chr12_120600928-120600928_C_T | 662D>N  | Substitution | Nonsynonymous coding | 16% |
| MM18T | GCN1L1  | GCN1 general control of amino-acid synthesis 1-like 1 (yeast)             | CCDS41847.1     | chr12_120599323-120599323_C_A | 803E>X  | Substitution | Nonsense             | 11% |
| MM18T | GCNT1   | glucosaminyl (N-acetyl) transferase 1, core 2                             | CCDS6653.1      | chr9_79117940-79117940_A_T    | 215N>Y  | Substitution | Nonsynonymous coding | 14% |
| MM18T | GCNT2   | glucosaminyl (N-acetyl) transferase 2, I-branching enzyme (I blood group) | CCDS34338.1     | chr6_10529201-10529201_T_G    | 19I>M   | Substitution | Nonsynonymous coding | 18% |
| MM18T | GDF15   | growth differentiation factor 15                                          | CCDS12376.1     | chr19_18497229-18497229_A_G   | 77N>S   | Substitution | Nonsynonymous coding | 14% |
| MM18T | GDI1    | GDP dissociation inhibitor 1                                              | CCDS35452.1     | chrX_153670993-153670993_G_A  | 440D>N  | Substitution | Nonsynonymous coding | 16% |
| MM18T | GDPD4   | glycerophosphodiester phosphodiesterase domain containing 4               | CCDS8249.1      | chr11_76938915-76938915_G_A   | 507R>C  | Substitution | Nonsynonymous coding | 15% |
| MM18T | GEMIN2  | gem (nuclear organelle) associated protein 2                              | CCDS9669.1      | chr14_39584084-39584084_G_T   | 74K>N   | Substitution | Nonsynonymous coding | 12% |
| MM18T | GEMIN2  | gem (nuclear organelle) associated protein 2                              | CCDS9669.1      | chr14_39591738-39591738_T_G   | 170D>E  | Substitution | Nonsynonymous coding | 11% |
| MM18T | GEMIN5  | gem (nuclear organelle) associated protein 5                              | CCDS4330.1      | chr5_154280906-154280906_A_C  | 1003F>V | Substitution | Nonsynonymous coding | 12% |
| MM18T | GEMIN5  | gem (nuclear organelle) associated protein 5                              | CCDS4330.1      | chr5_154311021-154311021_G_A  | 260R>X  | Substitution | Nonsense             | 11% |
| MM18T | GEN1    | Gen endonuclease homolog 1 (Drosophila)                                   | CCDS1691.1      | chr2_17963166-17963166_C_T    | 896P>L  | Substitution | Nonsynonymous coding | 11% |

|       |        |                                                     |             |                               |        |              |                      |     |
|-------|--------|-----------------------------------------------------|-------------|-------------------------------|--------|--------------|----------------------|-----|
| MM18T | GFAP   | glial fibrillary acidic protein                     | CCDS11491.1 | chr17_42990644-42990644_C_T   | 258R>H | Substitution | Nonsynonymous coding | 13% |
| MM18T | GFI1   | growth factor independent 1 transcription repressor | CCDS30773.1 | chr1_92949029-92949029_G_A    | 6L>F   | Substitution | Nonsynonymous coding | 19% |
| MM18T | GFRA1  | GDNF family receptor alpha 1                        | CCDS44481.1 | chr10_118030497-118030497_C_A | 57E>D  | Substitution | Nonsynonymous coding | 14% |
| MM18T | GGCX   | gamma-glutamyl carboxylase                          | CCDS1978.1  | chr2_85788022-85788022_C_T    | 44D>N  | Substitution | Nonsynonymous coding | 14% |
| MM18T | GH2    | growth hormone 2                                    | CCDS11648.1 | chr17_61958402-61958402_G_A   | 93T>M  | Substitution | Nonsynonymous coding | 14% |
| MM18T | GHDC   | GH3 domain containing                               | CCDS11422.1 | chr17_40344257-40344257_A_G   | ISV+2> | Substitution | Splice site donor    | 13% |
| MM18T | GHRHR  | growth hormone releasing hormone receptor           | CCDS5432.1  | chr7_31015470-31015470_C_A    | 321Q>K | Substitution | Nonsynonymous coding | 10% |
| MM18T | GIGYF2 | GRB10 interacting GYF protein 2                     | CCDS46542.1 | chr2_23365577-23365577_A_C    | 316E>D | Substitution | Nonsynonymous coding | 11% |
| MM18T | GIMAP1 | GTPase, IMAP family member 1                        | CCDS5906.1  | chr7_150417519-150417519_G_A  | 143V>I | Substitution | Nonsynonymous coding | 16% |
| MM18T | GIMAP6 | GTPase, IMAP family member 6                        | CCDS34778.1 | chr7_150327225-150327225_C_A  | 2E>D   | Substitution | Nonsynonymous coding | 14% |
| MM18T | GIMAP8 | GTPase, IMAP family member 8                        | CCDS34777.1 | chr7_150171726-150171726_G_T  | 437E>X | Substitution | Nonsense             | 10% |
| MM18T | GJA10  | gap junction protein, alpha 10, 62kDa               | CCDS5025.1  | chr6_90605617-90605617_G_T    | 477R>I | Substitution | Nonsynonymous coding | 14% |
| MM18T | GJA9   | gap junction protein, alpha 9, 59kDa                | CCDS432.1   | chr1_39341176-39341176_C_T    | 199D>N | Substitution | Nonsynonymous coding | 14% |
| MM18T | GJB3   | gap junction protein, beta 3, 31kDa                 | CCDS384.1   | chr1_35251033-35251033_C_T    | 224R>X | Substitution | Nonsense             | 20% |
| MM18T | GJB7   | gap junction protein, beta 7, 25kDa                 | CCDS5008.1  | chr6_87994609-87994609_C_A    | 8D>Y   | Substitution | Nonsynonymous coding | 13% |
| MM18T | GJC3   | gap junction protein, gamma 3, 30.2kDa              | CCDS34697.1 | chr7_99526534-99526534_C_T    | 237S>N | Substitution | Nonsynonymous coding | 12% |
| MM18T | GJD4   | gap junction protein, delta 4, 40.1kDa              | CCDS7191.1  | chr10_35896971-35896971_G_A   | 177R>H | Substitution | Nonsynonymous coding | 21% |
| MM18T | GJD4   | gap junction protein, delta 4, 40.1kDa              | CCDS7191.1  | chr10_35897459-35897459_G_A   | 340A>T | Substitution | Nonsynonymous coding | 19% |
| MM18T | GLB1   | galactosidase, beta 1                               | CCDS43061.1 | chr3_33109752-33109752_C_A    | 143E>X | Substitution | Nonsense             | 15% |
| MM18T | GLB1L3 | galactosidase, beta 1-like 3                        | CCDS44780.1 | chr11_134183307-134183307_G_T | 506R>S | Substitution | Nonsynonymous coding | 11% |
| MM18T | GLB1L3 | galactosidase, beta 1-like 3                        | CCDS44780.1 | chr11_134184258-134184258_A_G | 568S>G | Substitution | Nonsynonymous coding | 16% |
| MM18T | GLCE   | glucuronic acid epimerase                           | CCDS32277.1 | chr15_69548596-69548596_C_T   | 151R>W | Substitution | Nonsynonymous coding | 11% |
| MM18T | GLI1   | GLI family zinc finger 1                            | CCDS8940.1  | chr12_57861814-57861814_G_A   | 372R>H | Substitution | Nonsynonymous coding | 16% |
| MM18T | GLI1   | GLI family zinc finger 1                            | CCDS8940.1  | chr12_57864937-57864937_G_A   | 805R>Q | Substitution | Nonsynonymous coding | 14% |
| MM18T | GLI2   | GLI family zinc finger 2                            | CCDS33283.1 | chr2_121729518-121729518_A_G  | 354N>S | Substitution | Nonsynonymous coding | 14% |
| MM18T | GLI2   | GLI family zinc finger 2                            | CCDS33283.1 | chr2_121746351-121746351_C_T  | 954A>V | Substitution | Nonsynonymous coding | 26% |
| MM18T | GLIPR2 | GLI pathogenesis-related 2                          | CCDS6598.1  | chr9_36148616-36148616_G_T    | 65E>D  | Substitution | Nonsynonymous coding | 14% |
| MM18T | GLIS2  | GLIS family zinc finger 2                           | CCDS10511.1 | chr16_4385179-4385179_G_T     | 214R>L | Substitution | Nonsynonymous coding | 21% |
| MM18T | GLIS2  | GLIS family zinc finger 2                           | CCDS10511.1 | chr16_4385184-4385184_T_G     | 216F>V | Substitution | Nonsynonymous coding | 20% |
| MM18T | GLIS3  | GLIS family zinc finger 3                           | CCDS43784.1 | chr9_3856119-3856119_A_G      | 788I>T | Substitution | Nonsynonymous coding | 12% |
| MM18T | GLIS3  | GLIS family zinc finger 3                           | CCDS43784.1 | chr9_4117850-4117850_C_T      | 543R>Q | Substitution | Nonsynonymous coding | 15% |
| MM18T | GLOD4  | glyoxalase domain containing 4                      | CCDS32520.1 | chr17_674696-674696_C_T       | 138V>I | Substitution | Nonsynonymous coding | 12% |

|       |         |                                                                      |              |                               |         |              |                      |     |
|-------|---------|----------------------------------------------------------------------|--------------|-------------------------------|---------|--------------|----------------------|-----|
| MM18T | GLOD5   | glyoxalase domain containing 5                                       | NM_001080489 | chrX_48631802-48631802_G_A    | 145R>Q  | Substitution | Nonsynonymous coding | 12% |
| MM18T | GLRA2   | glycine receptor, alpha 2                                            | CCDS14160.1  | chrX_14550450-14550450_G_A    | 53G>E   | Substitution | Nonsynonymous coding | 20% |
| MM18T | GLRA2   | glycine receptor, alpha 2                                            | CCDS14160.1  | chrX_14625268-14625268_A_C    | 198N>T  | Substitution | Nonsynonymous coding | 10% |
| MM18T | GLRX    | glutaredoxin (thioltransferase)                                      | CCDS4078.1   | chr5_95152306-95152306_C_A    | 78D>Y   | Substitution | Nonsynonymous coding | 21% |
| MM18T | GLRX3   | glutaredoxin 3                                                       | CCDS57661.1  | chr10_131973150-131973150_G_A | 282D>N  | Substitution | Nonsynonymous coding | 11% |
| MM18T | GLS     | glutaminase                                                          | CCDS2308.1   | chr2_191769806-191769806_A_G  | 298N>D  | Substitution | Nonsynonymous coding | 13% |
| MM18T | GLT1D1  | glycosyltransferase 1 domain containing 1                            | CCDS9265.1   | chr12_129431910-129431910_G_T | 149E>D  | Substitution | Nonsynonymous coding | 11% |
| MM18T | GLT25D2 | glycosyltransferase 25 domain containing 2                           | CCDS1360.1   | chr1_183947586-183947586_C_A  | 111R>I  | Substitution | Nonsynonymous coding | 14% |
| MM18T | GMPPA   | GDP-mannose pyrophosphorylase A                                      | CCDS2441.1   | chr2_220370215-220370215_G_A  | 264R>Q  | Substitution | Nonsynonymous coding | 11% |
| MM18T | GMPPA   | GDP-mannose pyrophosphorylase A                                      | CCDS2441.1   | chr2_220371462-220371462_C_T  | 402S>L  | Substitution | Nonsynonymous coding | 11% |
| MM18T | GNA11   | guanine nucleotide binding protein (G protein), alpha 11 (Gq class)  | CCDS12103.1  | chr19_3115048-3115048_G_A     | 195D>N  | Substitution | Nonsynonymous coding | 22% |
| MM18T | GNA13   | guanine nucleotide binding protein (G protein), alpha 13             | CCDS11661.1  | chr17_63052587-63052587__T    | NA      | Insertion    | Frameshift           | 13% |
| MM18T | GNAZ    | guanine nucleotide binding protein (G protein), alpha z polypeptide  | CCDS13804.1  | chr22_23465277-23465277_C_T   | 243R>W  | Substitution | Nonsynonymous coding | 21% |
| MM18T | GNE     | glucosamine (UDP-N-acetyl)-2-epimerase/N-acetylmannosamine kinase    | CCDS47965.1  | chr9_36233923-36233923_C_A    | 357E>X  | Substitution | Nonsense             | 17% |
| MM18T | GNL2    | guanine nucleotide binding protein-like 2 (nucleolar)                | CCDS421.1    | chr1_38034900-38034900_G_T    | 474L>I  | Substitution | Nonsynonymous coding | 15% |
| MM18T | GNPDA1  | glucosamine-6-phosphate deaminase 1                                  | CCDS4272.1   | chr5_141384676-141384676_C_T  | 139G>S  | Substitution | Nonsynonymous coding | 13% |
| MM18T | GNPTAB  | N-acetylglucosamine-1-phosphate transferase, alpha and beta subunits | CCDS9088.1   | chr12_102147186-102147186_C_T | 1189R>Q | Substitution | Nonsynonymous coding | 17% |
| MM18T | GNPTAB  | N-acetylglucosamine-1-phosphate transferase, alpha and beta subunits | CCDS9088.1   | chr12_102140971-102140971_C_A | 1248E>X | Substitution | Nonsense             | 17% |
| MM18T | GOLGA4  | golgin A4                                                            | CCDS2666.1   | chr3_37340832-37340832_G_T    | 352K>N  | Substitution | Nonsynonymous coding | 13% |
| MM18T | GOLGA4  | golgin A4                                                            | CCDS2666.1   | chr3_37330780-37330780_G_T    | 194E>X  | Substitution | Nonsense             | 12% |
| MM18T | GOLGB1  | golgin B1                                                            | CCDS3004.1   | chr3_121411136-121411136_A_C  | 2354F>V | Substitution | Nonsynonymous coding | 11% |
| MM18T | GOLGB1  | golgin B1                                                            | CCDS3004.1   | chr3_121413002-121413002_T_C  | 2118Q>R | Substitution | Nonsynonymous coding | 11% |
| MM18T | GOLGB1  | golgin B1                                                            | CCDS3004.1   | chr3_121417266-121417266_C_T  | 697E>K  | Substitution | Nonsynonymous coding | 16% |
| MM18T | GOLGB1  | golgin B1                                                            | CCDS3004.1   | chr3_121415541-121415541_C_A  | 1272E>X | Substitution | Nonsense             | 12% |
| MM18T | GOLIM4  | golgi integral membrane protein 4                                    | CCDS3204.1   | chr3_167750633-167750633_C_T  | 284R>Q  | Substitution | Nonsynonymous coding | 12% |
| MM18T | GON4L   | gon-4-like (C. elegans)                                              | CCDS44242.1  | chr1_155823174-155823174_T_G  | 133K>T  | Substitution | Nonsynonymous coding | 11% |
| MM18T | GORASP2 | golgi reassembly stacking protein 2, 55kDa                           | CCDS33325.1  | chr2_171811212-171811212_T_C  | 207F>L  | Substitution | Nonsynonymous coding | 16% |
| MM18T | GPA33   | glycoprotein A33 (transmembrane)                                     | CCDS1258.1   | chr1_167038279-167038279_C_T  | 99D>N   | Substitution | Nonsynonymous coding | 14% |
| MM18T | GPAA1   | glycosylphosphatidylinositol anchor attachment 1                     | CCDS43776.1  | chr8_145138173-145138173_C_T  | 74A>V   | Substitution | Nonsynonymous coding | 12% |
| MM18T | GPAA1   | glycosylphosphatidylinositol anchor attachment 1                     | CCDS43776.1  | chr8_145139669-145139669_G_A  | 352R>H  | Substitution | Nonsynonymous coding | 20% |
| MM18T | GPAM    | glycerol-3-phosphate acyltransferase, mitochondrial                  | CCDS7570.1   | chr10_113928096-113928096_C_T | 361E>K  | Substitution | Nonsynonymous coding | 18% |
| MM18T | GPC3    | glypican 3                                                           | CCDS14638.1  | chrX_132795832-132795832_G_A  | 447L>F  | Substitution | Nonsynonymous coding | 13% |

|       |        |                                                                 |             |                               |         |              |                      |     |
|-------|--------|-----------------------------------------------------------------|-------------|-------------------------------|---------|--------------|----------------------|-----|
| MM18T | GPD1   | glycerol-3-phosphate dehydrogenase 1 (soluble)                  | CCDS8799.1  | chr12_50500665-50500665_G_T   | 193E>X  | Substitution | Nonsense             | 13% |
| MM18T | GPD1L  | glycerol-3-phosphate dehydrogenase 1-like                       | CCDS33729.1 | chr3_32188173-32188173_C_T    | 189R>X  | Substitution | Nonsense             | 11% |
| MM18T | GPBR   | G protein-coupled estrogen receptor 1                           | CCDS5322.1  | chr7_1132433-1132433_A_G      | 357K>E  | Substitution | Nonsynonymous coding | 12% |
| MM18T | GPHN   | gephyrin                                                        | CCDS9777.1  | chr14_67579784-67579784_A_G   | 508T>A  | Substitution | Nonsynonymous coding | 10% |
| MM18T | GPN3   | GPN-loop GTPase 3                                               | CCDS9147.1  | chr12_110895340-110895340_G_T | 142S>Y  | Substitution | Nonsynonymous coding | 11% |
| MM18T | GPR101 | G protein-coupled receptor 101                                  | CCDS14662.1 | chrX_136112902-136112902_G_A  | 311T>M  | Substitution | Nonsynonymous coding | 16% |
| MM18T | GPR112 | G protein-coupled receptor 112                                  | CCDS35409.1 | chrX_135428720-135428720_G_A  | 952G>E  | Substitution | Nonsynonymous coding | 11% |
| MM18T | GPR112 | G protein-coupled receptor 112                                  | CCDS35409.1 | chrX_135430874-135430874_C_T  | 1670P>L | Substitution | Nonsynonymous coding | 12% |
| MM18T | GPR115 | G protein-coupled receptor 115                                  | CCDS4922.2  | chr6_47685034-47685034_G_T    | 661D>Y  | Substitution | Nonsynonymous coding | 15% |
| MM18T | GPR116 | G protein-coupled receptor 116                                  | CCDS4919.1  | chr6_46851913-46851913_G_A    | 142R>C  | Substitution | Nonsynonymous coding | 14% |
| MM18T | GPR119 | G protein-coupled receptor 119                                  | CCDS14625.1 | chrX_129518784-129518784_C_T  | 213R>Q  | Substitution | Nonsynonymous coding | 13% |
| MM18T | GPR124 | G protein-coupled receptor 124                                  | CCDS6097.2  | chr8_37690682-37690682_C_A    | 418L>I  | Substitution | Nonsynonymous coding | 20% |
| MM18T | GPR128 | G protein-coupled receptor 128                                  | CCDS2938.1  | chr3_100349561-100349561_A    | NA      | Insertion    | Frameshift           | 12% |
| MM18T | GPR133 | G protein-coupled receptor 133                                  | CCDS9272.1  | chr12_131623791-131623791_G_A | 870D>N  | Substitution | Nonsynonymous coding | 16% |
| MM18T | GPR142 | G protein-coupled receptor 142                                  | CCDS11698.1 | chr17_72368462-72368462_C_T   | 371A>V  | Substitution | Nonsynonymous coding | 16% |
| MM18T | GPR148 | G protein-coupled receptor 148                                  | CCDS2163.1  | chr2_131486731-131486731_G_A  | 3D>N    | Substitution | Nonsynonymous coding | 16% |
| MM18T | GPR148 | G protein-coupled receptor 148                                  | CCDS2163.1  | chr2_131486808-131486808_G_T  | 28M>I   | Substitution | Nonsynonymous coding | 13% |
| MM18T | GPR148 | G protein-coupled receptor 148                                  | CCDS2163.1  | chr2_131486951-131486951_G_A  | 76R>Q   | Substitution | Nonsynonymous coding | 12% |
| MM18T | GPR148 | G protein-coupled receptor 148                                  | CCDS2163.1  | chr2_131487081-131487081_G_T  | 119M>I  | Substitution | Nonsynonymous coding | 19% |
| MM18T | GPR149 | G protein-coupled receptor 149                                  | CCDS43162.1 | chr3_154146908-154146908_G_A  | 166A>V  | Substitution | Nonsynonymous coding | 11% |
| MM18T | GPR149 | G protein-coupled receptor 149                                  | CCDS43162.1 | chr3_154055907-154055907_G_A  | 593R>X  | Substitution | Nonsense             | 12% |
| MM18T | GPR15  | G protein-coupled receptor 15                                   | CCDS2931.1  | chr3_98251499-98251499_T_G    | 208L>V  | Substitution | Nonsynonymous coding | 11% |
| MM18T | GPR153 | G protein-coupled receptor 153                                  | CCDS64.1    | chr1_6314871-6314871_A_G      | 32V>A   | Substitution | Nonsynonymous coding | 19% |
| MM18T | GPR155 | G protein-coupled receptor 155                                  | CCDS2259.1  | chr2_175333791-175333791_G_A  | 344T>I  | Substitution | Nonsynonymous coding | 13% |
| MM18T | GPR156 | G protein-coupled receptor 156                                  | CCDS2997.1  | chr3_119886018-119886018_C_T  | 769S>N  | Substitution | Nonsynonymous coding | 12% |
| MM18T | GPR158 | G protein-coupled receptor 158                                  | CCDS31166.1 | chr10_25887418-25887418_G_T   | 955D>Y  | Substitution | Nonsynonymous coding | 15% |
| MM18T | GPR158 | G protein-coupled receptor 158                                  | CCDS31166.1 | chr10_25888086-25888086_G_T   | 1177E>D | Substitution | Nonsynonymous coding | 18% |
| MM18T | GPR179 | G protein-coupled receptor 179                                  | CCDS42308.1 | chr17_36482659-36482659_C_T   | 2265E>K | Substitution | Nonsynonymous coding | 16% |
| MM18T | GPR18  | G protein-coupled receptor 18                                   | CCDS9491.1  | chr13_99907540-99907540__A    | NA      | Insertion    | Frameshift           | 10% |
| MM18T | GPR37  | G protein-coupled receptor 37 (endothelin receptor type B-like) | CCDS5792.1  | chr7_124387106-124387106_C_T  | 439D>N  | Substitution | Nonsynonymous coding | 11% |
| MM18T | GPR4   | G protein-coupled receptor 4                                    | CCDS12669.1 | chr19_46095084-46095084_C_T   | 14R>H   | Substitution | Nonsynonymous coding | 15% |
| MM18T | GPR6   | G protein-coupled receptor 6                                    | CCDS5079.1  | chr6_110300848-110300848_C_T  | 178S>L  | Substitution | Nonsynonymous coding | 21% |

|       |         |                                                           |                 |                               |         |              |                      |     |
|-------|---------|-----------------------------------------------------------|-----------------|-------------------------------|---------|--------------|----------------------|-----|
| MM18T | GPR64   | G protein-coupled receptor 64                             | CCDS43923.1     | chrX_19026171-19026171_T_G    | 498N>T  | Substitution | Nonsynonymous coding | 18% |
| MM18T | GPR65   | G protein-coupled receptor 65                             | CCDS9879.1      | chr14_88478006-88478006_A_G   | 272Y>C  | Substitution | Nonsynonymous coding | 13% |
| MM18T | GPR75   | G protein-coupled receptor 75                             | CCDS1849.1      | chr2_54080672-54080672_G_A    | 408R>X  | Substitution | Nonsense             | 17% |
| MM18T | GPR98   | G protein-coupled receptor 98                             | CCDS47246.1     | chr5_89923208-89923208_C_T    | 285R>C  | Substitution | Nonsynonymous coding | 16% |
| MM18T | GPR98   | G protein-coupled receptor 98                             | CCDS47246.1     | chr5_89947510-89947510_G_T    | 1127D>Y | Substitution | Nonsynonymous coding | 13% |
| MM18T | GPR98   | G protein-coupled receptor 98                             | CCDS47246.1     | chr5_89949700-89949700_G_A    | 1437E>K | Substitution | Nonsynonymous coding | 12% |
| MM18T | GPR98   | G protein-coupled receptor 98                             | CCDS47246.1     | chr5_89992813-89992813_G_A    | 2669E>K | Substitution | Nonsynonymous coding | 12% |
| MM18T | GPR98   | G protein-coupled receptor 98                             | CCDS47246.1     | chr5_90149201-90149201_G_T    | 5769D>Y | Substitution | Nonsynonymous coding | 17% |
| MM18T | GPR98   | G protein-coupled receptor 98                             | CCDS47246.1     | chr5_90049584-90049584_C_A    | 3772S>X | Substitution | Nonsense             | 11% |
| MM18T | GPRC5A  | G protein-coupled receptor, family C, group 5, member A   | CCDS8657.1      | chr12_13061368-13061368_G_A   | 62R>Q   | Substitution | Nonsynonymous coding | 17% |
| MM18T | GPRIN1  | G protein regulated inducer of neurite outgrowth 1        | CCDS4405.1      | chr5_176023834-176023834_G_A  | 1001S>L | Substitution | Nonsynonymous coding | 10% |
| MM18T | GPT     | glutamic-pyruvate transaminase (alanine aminotransferase) | CCDS6430.1      | chr8_145731281-145731281_G_A  | 264E>K  | Substitution | Nonsynonymous coding | 16% |
| MM18T | GRAMD1A | GRAM domain containing 1A                                 | CCDS42546.1     | chr19_35504537-35504537_C_T   | 271S>L  | Substitution | Nonsynonymous coding | 14% |
| MM18T | GRB14   | growth factor receptor-bound protein 14                   | CCDS2222.1      | chr2_165364981-165364981_G_A  | 336A>V  | Substitution | Nonsynonymous coding | 11% |
| MM18T | GREB1   | growth regulation by estrogen in breast cancer 1          | CCDS42655.1     | chr2_11725319-11725319_C_T    | 312R>C  | Substitution | Nonsynonymous coding | 14% |
| MM18T | GREB1   | growth regulation by estrogen in breast cancer 1          | CCDS42655.1     | chr2_11755279-11755279_A_G    | 1062E>G | Substitution | Nonsynonymous coding | 16% |
| MM18T | GRHPR   | glyoxylate reductase/hydroxypyruvate reductase            | ENST00000377824 | chr9_37430802-37430802_C_T    | 298T>M  | Substitution | Nonsynonymous coding | 19% |
| MM18T | GRID1   | glutamate receptor, ionotropic, delta 1                   | CCDS31236.1     | chr10_87484162-87484162_G_T   | 602S>Y  | Substitution | Nonsynonymous coding | 16% |
| MM18T | GRID1   | glutamate receptor, ionotropic, delta 1                   | CCDS31236.1     | chr10_88123756-88123756_C_A   | 59K>N   | Substitution | Nonsynonymous coding | 28% |
| MM18T | GRID2   | glutamate receptor, ionotropic, delta 2                   | CCDS3637.1      | chr4_94693576-94693576_C_A    | 984S>Y  | Substitution | Nonsynonymous coding | 13% |
| MM18T | GRIK2   | glutamate receptor, ionotropic, kainate 2                 | CCDS5048.1      | chr6_102124560-102124560_C_T  | 202R>C  | Substitution | Nonsynonymous coding | 22% |
| MM18T | GRIK2   | glutamate receptor, ionotropic, kainate 2                 | CCDS5048.1      | chr6_102503324-102503324_G_T  | 811E>X  | Substitution | Nonsense             | 10% |
| MM18T | GRIK4   | glutamate receptor, ionotropic, kainate 4                 | CCDS8433.1      | chr11_120745947-120745947_C_T | 387R>W  | Substitution | Nonsynonymous coding | 14% |
| MM18T | GRIK5   | glutamate receptor, ionotropic, kainate 5                 | CCDS12595.1     | chr19_42558029-42558029_C_A   | 370R>I  | Substitution | Nonsynonymous coding | 12% |
| MM18T | GRIK5   | glutamate receptor, ionotropic, kainate 5                 | CCDS12595.1     | chr19_42566748-42566748_C_T   | 134A>T  | Substitution | Nonsynonymous coding | 14% |
| MM18T | GRIN2A  | glutamate receptor, ionotropic, N-methyl D-aspartate 2A   | CCDS10539.1     | chr16_9858756-9858756_G_T     | 882S>Y  | Substitution | Nonsynonymous coding | 13% |
| MM18T | GRIN2B  | glutamate receptor, ionotropic, N-methyl D-aspartate 2B   | CCDS8662.1      | chr12_13716681-13716681_C_T   | 1164R>H | Substitution | Nonsynonymous coding | 11% |
| MM18T | GRIN2B  | glutamate receptor, ionotropic, N-methyl D-aspartate 2B   | CCDS8662.1      | chr12_13724831-13724831_C_T   | 693R>K  | Substitution | Nonsynonymous coding | 16% |
| MM18T | GRIN2C  | glutamate receptor, ionotropic, N-methyl D-aspartate 2C   | CCDS32724.1     | chr17_72839187-72839187_C_T   | 1030S>N | Substitution | Nonsynonymous coding | 12% |
| MM18T | GRIN2C  | glutamate receptor, ionotropic, N-methyl D-aspartate 2C   | CCDS32724.1     | chr17_72846458-72846458_C_T   | 460D>N  | Substitution | Nonsynonymous coding | 30% |
| MM18T | GRIN2C  | glutamate receptor, ionotropic, N-methyl D-aspartate 2C   | CCDS32724.1     | chr17_72848273-72848273_C_T   | 293V>M  | Substitution | Nonsynonymous coding | 16% |
| MM18T | GRIN3A  | glutamate receptor, ionotropic, N-methyl-D-aspartate 3A   | CCDS6758.1      | chr9_104335749-104335749_G_T  | 1019L>M | Substitution | Nonsynonymous coding | 16% |

|       |         |                                                               |             |                               |         |              |                      |     |
|-------|---------|---------------------------------------------------------------|-------------|-------------------------------|---------|--------------|----------------------|-----|
| MM18T | GRIN3B  | glutamate receptor, ionotropic, N-methyl-D-aspartate 3B       | CCDS32861.1 | chr19_1003241-1003241_G_A     | 180R>H  | Substitution | Nonsynonymous coding | 13% |
| MM18T | GRIPAP1 | GRIP1 associated protein 1                                    | CCDS35248.1 | chrX_48837681-48837681_C_A    | 626D>Y  | Substitution | Nonsynonymous coding | 20% |
| MM18T | GRK7    | G protein-coupled receptor kinase 7                           | CCDS3120.1  | chr3_141535674-141535674_G_A  | 482D>N  | Substitution | Nonsynonymous coding | 10% |
| MM18T | GRM1    | glutamate receptor, metabotropic 1                            | CCDS5209.1  | chr6_146480714-146480714_G_A  | 311E>K  | Substitution | Nonsynonymous coding | 14% |
| MM18T | GRM2    | glutamate receptor, metabotropic 2                            | CCDS2834.1  | chr3_51746637-51746637_G_A    | 200R>H  | Substitution | Nonsynonymous coding | 17% |
| MM18T | GRM5    | glutamate receptor, metabotropic 5                            | CCDS44694.1 | chr11_88241839-88241839_G_A   | 1187S>L | Substitution | Nonsynonymous coding | 11% |
| MM18T | GRM6    | glutamate receptor, metabotropic 6                            | CCDS4442.1  | chr5_178413204-178413204_C_T  | 684R>H  | Substitution | Nonsynonymous coding | 16% |
| MM18T | GRM6    | glutamate receptor, metabotropic 6                            | CCDS4442.1  | chr5_178413516-178413516_C_A  | 580S>I  | Substitution | Nonsynonymous coding | 14% |
| MM18T | GRM6    | glutamate receptor, metabotropic 6                            | CCDS4442.1  | chr5_178415953-178415953_C_T  | 446R>Q  | Substitution | Nonsynonymous coding | 21% |
| MM18T | GRM8    | glutamate receptor, metabotropic 8                            | CCDS47696.1 | chr7_126746765-126746765_A_G  | 171I>T  | Substitution | Nonsynonymous coding | 12% |
| MM18T | GRM8    | glutamate receptor, metabotropic 8                            | CCDS47696.1 | chr7_126882873-126882873_G_A  | 129S>L  | Substitution | Nonsynonymous coding | 12% |
| MM18T | GRPR    | gastrin-releasing peptide receptor                            | CCDS14174.1 | chrX_16142186-16142186_C_T    | 37P>L   | Substitution | Nonsynonymous coding | 11% |
| MM18T | GSN     | gelsolin                                                      | CCDS6828.1  | chr9_124083643-124083643_G_A  | 481R>H  | Substitution | Nonsynonymous coding | 14% |
| MM18T | GSTCD   | glutathione S-transferase, C-terminal domain containing       | CCDS43257.1 | chr4_106746865-106746865_C_T  | 480R>C  | Substitution | Nonsynonymous coding | 17% |
| MM18T | GSTO2   | glutathione S-transferase omega 2                             | CCDS7556.1  | chr10_106034707-106034707_G_T | 12G>X   | Substitution | Nonsense             | 23% |
| MM18T | GSX2    | GS homeobox 2                                                 | CCDS3494.1  | chr4_54967959-54967959_A_C    | 262K>T  | Substitution | Nonsynonymous coding | 21% |
| MM18T | GTDC2   | glycosyltransferase-like domain containing 2                  | CCDS2709.1  | chr3_43122281-43122281_G_T    | 215L>I  | Substitution | Nonsynonymous coding | 15% |
| MM18T | GTF2E1  | general transcription factor IIE, polypeptide 1, alpha 56kDa  | CCDS3002.1  | chr3_120500291-120500291_C_T  | 432R>C  | Substitution | Nonsynonymous coding | 12% |
| MM18T | GTF3C2  | general transcription factor IIIC, polypeptide 2, beta 110kDa | CCDS1749.1  | chr2_27565772-27565772_C_A    | 164E>X  | Substitution | Nonsense             | 13% |
| MM18T | GTF3C4  | general transcription factor IIIC, polypeptide 4, 90kDa       | CCDS6953.1  | chr9_135546334-135546334_C_A  | 117L>I  | Substitution | Nonsynonymous coding | 24% |
| MM18T | GTF3C5  | general transcription factor IIIC, polypeptide 5, 63kDa       | CCDS48050.1 | chr9_135929299-135929299_G_A  | 320D>N  | Substitution | Nonsynonymous coding | 16% |
| MM18T | GTPBP10 | GTP-binding protein 10 (putative)                             | CCDS5617.1  | chr7_90012310-90012310_C_T    | 273A>V  | Substitution | Nonsynonymous coding | 13% |
| MM18T | GTSF1L  | gametocyte specific factor 1-like                             | CCDS13323.1 | chr20_42355090-42355090_G_T   | 82P>H   | Substitution | Nonsynonymous coding | 11% |
| MM18T | GUCA2B  | guanylate cyclase activator 2B (uroguanylin)                  | CCDS464.1   | chr11_42620505-42620505_C_T   | 82S>L   | Substitution | Nonsynonymous coding | 11% |
| MM18T | GUCY1A2 | guanylate cyclase 1, soluble, alpha 2                         | CCDS8335.1  | chr11_106849368-106849368_A_T | 155L>H  | Substitution | Nonsynonymous coding | 20% |
| MM18T | GUCY1A3 | guanylate cyclase 1, soluble, alpha 3                         | CCDS34085.1 | chr4_156632234-156632234_G_T  | 306R>I  | Substitution | Nonsynonymous coding | 17% |
| MM18T | GUCY2C  | guanylate cyclase 2C (heat stable enterotoxin receptor)       | CCDS8664.1  | chr12_14774101-14774101_C_T   | 884R>K  | Substitution | Nonsynonymous coding | 11% |
| MM18T | GUCY2C  | guanylate cyclase 2C (heat stable enterotoxin receptor)       | CCDS8664.1  | chr12_14809546-14809546_T_C   | 457Y>C  | Substitution | Nonsynonymous coding | 14% |
| MM18T | GUCY2D  | guanylate cyclase 2D, membrane (retina-specific)              | CCDS11127.1 | chr17_7917236-7917236_C_T     | 768R>W  | Substitution | Nonsynonymous coding | 19% |
| MM18T | GUCY2F  | guanylate cyclase 2F, retinal                                 | CCDS14545.1 | chrX_108635190-108635190_C_A  | 911D>Y  | Substitution | Nonsynonymous coding | 12% |
| MM18T | GULP1   | GULP, engulfment adaptor PTB domain containing 1              | CCDS2295.1  | chr2_189434056-189434056_A_C  | 164K>Q  | Substitution | Nonsynonymous coding | 13% |
| MM18T | GYS2    | glycogen synthase 2 (liver)                                   | CCDS8690.1  | chr12_21711145-21711145_C_A   | 471D>Y  | Substitution | Nonsynonymous coding | 11% |

|       |        |                                                                         |                 |                              |         |              |                      |     |
|-------|--------|-------------------------------------------------------------------------|-----------------|------------------------------|---------|--------------|----------------------|-----|
| MM18T | GZF1   | GDNF-inducible zinc finger protein 1                                    | CCDS13151.1     | chr20_23346354-23346354_C_T  | 445S>L  | Substitution | Nonsynonymous coding | 17% |
| MM18T | H1FNT  | H1 histone family, member N, testis-specific                            | CCDS8762.1      | chr12_48723420-48723420_G_A  | 116A>T  | Substitution | Nonsynonymous coding | 19% |
| MM18T | HACL1  | 2-hydroxyacyl-CoA lyase 1                                               | CCDS2627.1      | chr3_15613278-15613278_T_    | NA      | Deletion     | Splice site acceptor | 11% |
| MM18T | HAS1   | hyaluronan synthase 1                                                   | CCDS12838.1     | chr19_52216778-52216778_C_T  | 547A>T  | Substitution | Nonsynonymous coding | 19% |
| MM18T | HAS2   | hyaluronan synthase 2                                                   | CCDS6335.1      | chr8_122626698-122626698_G_T | 437S>Y  | Substitution | Nonsynonymous coding | 12% |
| MM18T | HAUS2  | HAUS augmin-like complex, subunit 2                                     | CCDS10090.1     | chr15_42858822-42858822_G_T  | 172K>N  | Substitution | Nonsynonymous coding | 10% |
| MM18T | HAUS5  | HAUS augmin-like complex, subunit 5                                     | CCDS42550.1     | chr19_36109528-36109528_C_T  | 315R>W  | Substitution | Nonsynonymous coding | 14% |
| MM18T | HAUS6  | HAUS augmin-like complex, subunit 6                                     | CCDS6489.1      | chr9_19060145-19060145_G_T   | 569S>Y  | Substitution | Nonsynonymous coding | 19% |
| MM18T | HAUS8  | HAUS augmin-like complex, subunit 8                                     | CCDS32948.1     | chr19_17169476-17169476_C_A  | 176K>N  | Substitution | Nonsynonymous coding | 22% |
| MM18T | HAX1   | HCLS1 associated protein X-1                                            | CCDS1064.1      | chr1_154245843-154245843_C_T | 29R>X   | Substitution | Nonsense             | 14% |
| MM18T | HBB    | hemoglobin, beta                                                        | CCDS7753.1      | chr11_5247985-5247985_A_C    | 46F>C   | Substitution | Nonsynonymous coding | 13% |
| MM18T | HBP1   | HMG-box transcription factor 1                                          | CCDS5741.1      | chr7_106820455-106820455_G_T | 39E>D   | Substitution | Nonsynonymous coding | 13% |
| MM18T | HCFC1  | host cell factor C1 (VP16-accessory protein)                            | CCDS44020.1     | chrX_153218166-153218166_C_T | 1581E>K | Substitution | Nonsynonymous coding | 16% |
| MM18T | HCFC1  | host cell factor C1 (VP16-accessory protein)                            | CCDS44020.1     | chrX_153222788-153222788_A_G | 777I>T  | Substitution | Nonsynonymous coding | 12% |
| MM18T | HCFC1  | host cell factor C1 (VP16-accessory protein)                            | CCDS44020.1     | chrX_153230037-153230037_C_T | 112E>K  | Substitution | Nonsynonymous coding | 13% |
| MM18T | HCK    | hemopoietic cell kinase                                                 | ENST00000375852 | chr20_30672247-30672247_C_T  | 225P>S  | Substitution | Nonsynonymous coding | 11% |
| MM18T | HCLS1  | hematopoietic cell-specific Lyn substrate 1                             | CCDS3003.1      | chr3_121351271-121351271_T_C | 383E>G  | Substitution | Nonsynonymous coding | 10% |
| MM18T | HCN1   | hyperpolarization activated cyclic nucleotide-gated potassium channel 1 | CCDS3952.1      | chr5_45262183-45262183_C_T   | 838R>H  | Substitution | Nonsynonymous coding | 17% |
| MM18T | HCN4   | hyperpolarization activated cyclic nucleotide-gated potassium channel 4 | CCDS10248.1     | chr15_73660488-73660488_C_A  | 42D>Y   | Substitution | Nonsynonymous coding | 20% |
| MM18T | HCRT2  | hypocretin (orexin) receptor 2                                          | CCDS4956.1      | chr6_55039539-55039539_G_T   | 52E>X   | Substitution | Nonsense             | 14% |
| MM18T | HDAC10 | histone deacetylase 10                                                  | CCDS14088.1     | chr22_50687860-50687860_C_T  | 196R>H  | Substitution | Nonsynonymous coding | 16% |
| MM18T | HDAC8  | histone deacetylase 8                                                   | CCDS14420.1     | chrX_71788727-71788727_T_C   | 58K>E   | Substitution | Nonsynonymous coding | 17% |
| MM18T | HDC    | histidine decarboxylase                                                 | CCDS10134.1     | chr15_50544635-50544635_C_T  | 345D>N  | Substitution | Nonsynonymous coding | 14% |
| MM18T | HDC    | histidine decarboxylase                                                 | CCDS10134.1     | chr15_50555517-50555517_C_T  | 40R>Q   | Substitution | Nonsynonymous coding | 15% |
| MM18T | HDCC2  | HD domain containing 2                                                  | CCDS43503.1     | chr6_125598269-125598269_C_A | 166D>Y  | Substitution | Nonsynonymous coding | 12% |
| MM18T | HDGFL1 | hepatoma derived growth factor-like 1                                   | CCDS34347.1     | chr6_22570381-22570381_G_A   | 193E>K  | Substitution | Nonsynonymous coding | 19% |
| MM18T | HDHD3  | haloacid dehalogenase-like hydrolase domain containing 3                | CCDS6793.1      | chr9_116136172-116136172_C_T | 155D>N  | Substitution | Nonsynonymous coding | 24% |
| MM18T | HDX    | highly divergent homeobox                                               | CCDS35342.1     | chrX_83723787-83723787_G_A   | 315S>L  | Substitution | Nonsynonymous coding | 11% |
| MM18T | HEATR1 | HEAT repeat containing 1                                                | CCDS31066.1     | chr1_236719491-236719491_G_T | 1808S>Y | Substitution | Nonsynonymous coding | 19% |
| MM18T | HEATR1 | HEAT repeat containing 1                                                | CCDS31066.1     | chr1_236723048-236723048_G_A | 1579A>V | Substitution | Nonsynonymous coding | 12% |
| MM18T | HECA   | headcase homolog (Drosophila)                                           | CCDS5194.1      | chr6_139488200-139488200_G_A | 351E>K  | Substitution | Nonsynonymous coding | 16% |
| MM18T | HECTD1 | HECT domain containing E3 ubiquitin protein ligase 1                    | CCDS41939.1     | chr14_31590683-31590683_C_T  | 1715R>Q | Substitution | Nonsynonymous coding | 18% |

|       |           |                                                                                         |                 |                               |         |              |                      |     |
|-------|-----------|-----------------------------------------------------------------------------------------|-----------------|-------------------------------|---------|--------------|----------------------|-----|
| MM18T | HECTD1    | HECT domain containing E3 ubiquitin protein ligase 1                                    | CCDS41939.1     | chr14_31597093-31597093_C_A   | 1627V>F | Substitution | Nonsynonymous coding | 16% |
| MM18T | HECTD1    | HECT domain containing E3 ubiquitin protein ligase 1                                    | CCDS41939.1     | chr14_31604400-31604400_T_G   | 1086T>P | Substitution | Nonsynonymous coding | 15% |
| MM18T | HECTD1    | HECT domain containing E3 ubiquitin protein ligase 1                                    | CCDS41939.1     | chr14_31585614-31585614_G_A   | 1816R>X | Substitution | Nonsense             | 10% |
| MM18T | HECW2     | HECT, C2 and WW domain containing E3 ubiquitin protein ligase 2                         | CCDS33354.1     | chr2_197172752-197172752_C_A  | 831R>I  | Substitution | Nonsynonymous coding | 13% |
| MM18T | HECW2     | HECT, C2 and WW domain containing E3 ubiquitin protein ligase 2                         | CCDS33354.1     | chr2_197183995-197183995_G_A  | 540S>F  | Substitution | Nonsynonymous coding | 14% |
| MM18T | HEG1      | HEG homolog 1 (zebrafish)                                                               | CCDS46898.1     | chr3_124716627-124716627_T_G  | 1186K>N | Substitution | Nonsynonymous coding | 17% |
| MM18T | HELZ2     | helicase with zinc finger 2, transcriptional coactivator                                | CCDS33508.1     | chr20_62200050-62200050_C_T   | 464R>H  | Substitution | Nonsynonymous coding | 14% |
| MM18T | HEMGN     | hemogen                                                                                 | CCDS6731.1      | chr9_100693016-100693016_C_A  | 221D>Y  | Substitution | Nonsynonymous coding | 16% |
| MM18T | HEMGN     | hemogen                                                                                 | CCDS6731.1      | chr9_100698504-100698504_C_A  | 41R>I   | Substitution | Nonsynonymous coding | 13% |
| MM18T | HEPACAM2  | HEPACAM family member 2                                                                 | CCDS43616.1     | chr7_92821639-92821639_G_A    | 438S>L  | Substitution | Nonsynonymous coding | 12% |
| MM18T | HERC1     | HECT and RLD domain containing E3 ubiquitin protein ligase family member 1              | CCDS45277.1     | chr15_63935615-63935615_A_C   | 3773I>M | Substitution | Nonsynonymous coding | 18% |
| MM18T | HERC1     | HECT and RLD domain containing E3 ubiquitin protein ligase family member 1              | CCDS45277.1     | chr15_64008537-64008537_C_A   | 1372E>X | Substitution | Nonsense             | 13% |
| MM18T | HERC2     | HECT and RLD domain containing E3 ubiquitin protein ligase 2                            | CCDS10021.1     | chr15_28358297-28358297_G_T   | 4718L>I | Substitution | Nonsynonymous coding | 13% |
| MM18T | HERC2     | HECT and RLD domain containing E3 ubiquitin protein ligase 2                            | CCDS10021.1     | chr15_28506030-28506030_C_T   | 737D>N  | Substitution | Nonsynonymous coding | 13% |
| MM18T | HERC2     | HECT and RLD domain containing E3 ubiquitin protein ligase 2                            | CCDS10021.1     | chr15_28514429-28514429_G_A   | 471R>C  | Substitution | Nonsynonymous coding | 14% |
| MM18T | HERC4     | HECT and RLD domain containing E3 ubiquitin protein ligase 4                            | CCDS41533.1     | chr10_69682845-69682845_T_G   | 1006K>T | Substitution | Nonsynonymous coding | 15% |
| MM18T | HEXB      | hexosaminidase B (beta polypeptide)                                                     | CCDS4022.1      | chr5_74009341-74009341_C_T    | 261S>F  | Substitution | Nonsynonymous coding | 11% |
| MM18T | HEXDC     | hexosaminidase (glycosyl hydrolase family 20, catalytic domain) containing              | CCDS42402.1     | chr17_80397508-80397508_T_C   | 301Y>H  | Substitution | Nonsynonymous coding | 30% |
| MM18T | HHIPL2    | HHIP-like 2                                                                             | CCDS1530.2      | chr1_222713615-222713615_C_T  | 396R>Q  | Substitution | Nonsynonymous coding | 12% |
| MM18T | HHIPL2    | HHIP-like 2                                                                             | CCDS1530.2      | chr1_222713652-222713652_C_T  | 384D>N  | Substitution | Nonsynonymous coding | 21% |
| MM18T | HHLA2     | HERV-H LTR-associating 2                                                                | CCDS46883.1     | chr3_108072351-108072351_A_C  | 48I>L   | Substitution | Nonsynonymous coding | 11% |
| MM18T | HIF1A     | hypoxia inducible factor 1, alpha subunit (basic helix-loop-helix transcription factor) | CCDS9753.1      | chr14_62193460-62193460_G_A   | 165R>Q  | Substitution | Nonsynonymous coding | 11% |
| MM18T | HIGD2B    | HIG1 hypoxia inducible domain family, member 2B                                         | ENST00000311755 | chr15_72968598-72968598_G_T   | 40L>I   | Substitution | Nonsynonymous coding | 11% |
| MM18T | HIP1R     | huntingtin interacting protein 1 related                                                | CCDS31922.1     | chr12_123342670-123342670_C_T | 613R>W  | Substitution | Nonsynonymous coding | 23% |
| MM18T | HIPK1     | homeodomain interacting protein kinase 1                                                | CCDS867.1       | chr1_114511225-114511225_G_A  | 909R>Q  | Substitution | Nonsynonymous coding | 18% |
| MM18T | HIPK2     | homeodomain interacting protein kinase 2                                                | NM_022740       | chr7_139299202-139299202_T_G  | 607N>T  | Substitution | Nonsynonymous coding | 11% |
| MM18T | HIPK2     | homeodomain interacting protein kinase 2                                                | NM_022740       | chr7_139316027-139316027_G_A  | 411R>W  | Substitution | Nonsynonymous coding | 10% |
| MM18T | HIPK3     | homeodomain interacting protein kinase 3                                                | CCDS7884.1      | chr11_33308298-33308298_G_A   | 113R>Q  | Substitution | Nonsynonymous coding | 13% |
| MM18T | HIRA      | HIR histone cell cycle regulation defective homolog A (S. cerevisiae)                   | CCDS13759.1     | chr22_19365588-19365588_C_A   | 473D>Y  | Substitution | Nonsynonymous coding | 12% |
| MM18T | HIST1H1A  | histone cluster 1, H1a                                                                  | CCDS4569.1      | chr6_26017944-26017944_G_T    | 6P>H    | Substitution | Nonsynonymous coding | 14% |
| MM18T | HIST1H2AB | histone cluster 1, H2ab                                                                 | CCDS4574.1      | chr6_26033411-26033411_C_T    | 129G>E  | Substitution | Nonsynonymous coding | 17% |
| MM18T | HIST1H2AB | histone cluster 1, H2ab                                                                 | CCDS4574.1      | chr6_26033765-26033765_G_A    | 11A>V   | Substitution | Nonsynonymous coding | 14% |



|       |          |                                                                                           |                 |                               |         |              |                      |     |
|-------|----------|-------------------------------------------------------------------------------------------|-----------------|-------------------------------|---------|--------------|----------------------|-----|
| MM18T | HIST1H3A | histone cluster 1, H3a                                                                    | CCDS4570.1      | chr6_26020939-26020939_G_T    | 74E>D   | Substitution | Nonsynonymous coding | 17% |
| MM18T | HIST1H4I | histone cluster 1, H4i                                                                    | CCDS4620.1      | chr6_27107193-27107193_C_T    | 36R>W   | Substitution | Nonsynonymous coding | 12% |
| MM18T | HIVEP1   | human immunodeficiency virus type I enhancer binding protein 1                            | CCDS43426.1     | chr6_12125382-12125382_C_T    | 1785S>L | Substitution | Nonsynonymous coding | 12% |
| MM18T | HIVEP1   | human immunodeficiency virus type I enhancer binding protein 1                            | CCDS43426.1     | chr6_12125504-12125504_G_T    | 1826E>X | Substitution | Nonsense             | 14% |
| MM18T | HIVEP2   | human immunodeficiency virus type I enhancer binding protein 2                            | CCDS43510.1     | chr6_143094230-143094230_G_T  | 549S>Y  | Substitution | Nonsynonymous coding | 11% |
| MM18T | HIVEP3   | human immunodeficiency virus type I enhancer binding protein 3                            | CCDS463.1       | chr1_41976339-41976339_G_A    | 2335P>L | Substitution | Nonsynonymous coding | 10% |
| MM18T | HIVEP3   | human immunodeficiency virus type I enhancer binding protein 3                            | CCDS463.1       | chr1_41976594-41976594_G_A    | 2250S>L | Substitution | Nonsynonymous coding | 18% |
| MM18T | HK2      | hexokinase 2                                                                              | CCDS1956.1      | chr2_75108851-75108851_C_A    | 528F>L  | Substitution | Nonsynonymous coding | 13% |
| MM18T | HLA-DQA2 | major histocompatibility complex, class II, DQ alpha 2                                    | CCDS4753.1      | chr6_32713693-32713693_T_G    | 153S>A  | Substitution | Nonsynonymous coding | 11% |
| MM18T | HLCS     | holocarboxylase synthetase (biotin-(proprionyl-CoA-carboxylase (ATP-hydrolysing)) ligase) | CCDS13647.1     | chr21_38309369-38309369_C_T   | 126E>K  | Substitution | Nonsynonymous coding | 18% |
| MM18T | HMCN1    | hemicentin 1                                                                              | CCDS30956.1     | chr1_185984467-185984467_C_A  | 1603L>I | Substitution | Nonsynonymous coding | 11% |
| MM18T | HMCN1    | hemicentin 1                                                                              | CCDS30956.1     | chr1_186056355-186056355_G_A  | 3018R>Q | Substitution | Nonsynonymous coding | 14% |
| MM18T | HMCN1    | hemicentin 1                                                                              | CCDS30956.1     | chr1_186086677-186086677_C_T  | 3924P>S | Substitution | Nonsynonymous coding | 13% |
| MM18T | HMCN1    | hemicentin 1                                                                              | CCDS30956.1     | chr1_186084057-186084057_C_T  | 3795R>X | Substitution | Nonsense             | 15% |
| MM18T | HMCN2    | hemicentin 2                                                                              | ENST00000420499 | chr9_133230396-133230396_G_A  | 363G>R  | Substitution | Nonsynonymous coding | 27% |
| MM18T | HMCN2    | hemicentin 2                                                                              | ENST00000277491 | chr9_133281372-133281372_G_A  | 1006A>T | Substitution | Nonsynonymous coding | 18% |
| MM18T | HMCN2    | hemicentin 2                                                                              | ENST00000277491 | chr9_133284298-133284298_C_T  | 1168S>L | Substitution | Nonsynonymous coding | 15% |
| MM18T | HMG20A   | high mobility group 20A                                                                   | CCDS10295.1     | chr15_77759533-77759533_C_T   | 112R>W  | Substitution | Nonsynonymous coding | 17% |
| MM18T | HMG20B   | high mobility group 20B                                                                   | CCDS45919.1     | chr19_3578044-3578044_G_A     | 292E>K  | Substitution | Nonsynonymous coding | 15% |
| MM18T | HMGCR    | 3-hydroxy-3-methylglutaryl-CoA reductase                                                  | CCDS4027.1      | chr5_74655871-74655871_G_A    | 840R>Q  | Substitution | Nonsynonymous coding | 10% |
| MM18T | HMGCS2   | 3-hydroxy-3-methylglutaryl-CoA synthase 2 (mitochondrial)                                 | CCDS905.1       | chr1_120300032-120300032_C_T  | 294D>N  | Substitution | Nonsynonymous coding | 17% |
| MM18T | HMGXB3   | HMG box domain containing 3                                                               | NM_014983       | chr5_149404047-149404047_G_A  | 422D>N  | Substitution | Nonsynonymous coding | 19% |
| MM18T | HMGXB3   | HMG box domain containing 3                                                               | NM_014983       | chr5_149428165-149428165_G_A  | 1040E>K | Substitution | Nonsynonymous coding | 13% |
| MM18T | HMHA1    | histocompatibility (minor) HA-1                                                           | CCDS32863.1     | chr19_1080514-1080514_C_T     | 627S>L  | Substitution | Nonsynonymous coding | 13% |
| MM18T | HMX2     | H6 family homeobox 2                                                                      | CCDS31305.1     | chr10_124909399-124909399_G_T | 194K>N  | Substitution | Nonsynonymous coding | 11% |
| MM18T | HMX3     | H6 family homeobox 3                                                                      | CCDS41575.1     | chr10_124896937-124896937_C_T | 255S>L  | Substitution | Nonsynonymous coding | 20% |
| MM18T | HN1L     | hematological and neurological expressed 1-like                                           | CCDS10441.1     | chr16_1735465-1735465_T_C     | 24S>P   | Substitution | Nonsynonymous coding | 11% |
| MM18T | HNF1B    | HNF1 homeobox B                                                                           | CCDS11324.1     | chr17_36091684-36091684_T_C   | 316D>G  | Substitution | Nonsynonymous coding | 13% |
| MM18T | HNF1B    | HNF1 homeobox B                                                                           | CCDS11324.1     | chr17_36099445-36099445_C_T   | 177R>Q  | Substitution | Nonsynonymous coding | 27% |
| MM18T | HNMT     | histamine N-methyltransferase                                                             | CCDS2181.1      | chr2_138771635-138771635_A_G  | 272S>G  | Substitution | Nonsynonymous coding | 11% |
| MM18T | HNRNP2   | heterogeneous nuclear ribonucleoprotein H2 (H')                                           | CCDS14485.1     | chrX_100667523-100667523_A_G  | 183I>V  | Substitution | Nonsynonymous coding | 11% |
| MM18T | HNRNPM   | heterogeneous nuclear ribonucleoprotein M                                                 | CCDS12203.1     | chr19_8550611-8550611_G_T     | 433E>D  | Substitution | Nonsynonymous coding | 11% |

|       |           |                                                       |                 |                               |         |              |                      |     |
|-------|-----------|-------------------------------------------------------|-----------------|-------------------------------|---------|--------------|----------------------|-----|
| MM18T | HOXA5     | homeobox A5                                           | CCDS5406.1      | chr7_27181693-27181693_C_T    | 192G>S  | Substitution | Nonsynonymous coding | 11% |
| MM18T | HOXA9     | homeobox A9                                           | CCDS5409.1      | chr7_27204578-27204578_C_A    | 167E>X  | Substitution | Nonsense             | 12% |
| MM18T | HOXB1     | homeobox B1                                           | CCDS32675.1     | chr17_46608022-46608022_G_A   | 82S>L   | Substitution | Nonsynonymous coding | 19% |
| MM18T | HOXD1     | homeobox D1                                           | CCDS2271.1      | chr2_177054544-177054544_G_A  | 221A>T  | Substitution | Nonsynonymous coding | 11% |
| MM18T | HOXD12    | homeobox D12                                          | CCDS46456.1     | chr2_176965292-176965292_G_A  | 206R>Q  | Substitution | Nonsynonymous coding | 19% |
| MM18T | HOXD4     | homeobox D4                                           | CCDS2269.1      | chr2_177016375-177016375_C_T  | 5S>L    | Substitution | Nonsynonymous coding | 20% |
| MM18T | HOXD9     | homeobox D9                                           | CCDS2267.2      | chr2_176987924-176987924_G_A  | 143R>H  | Substitution | Nonsynonymous coding | 16% |
| MM18T | HPCAL4    | hippocalcin like 4                                    | CCDS441.1       | chr1_40149618-40149618_C_A    | 123E>D  | Substitution | Nonsynonymous coding | 11% |
| MM18T | HPD       | 4-hydroxyphenylpyruvate dioxygenase                   | CCDS9224.1      | chr12_122294261-122294261_A_G | 98F>S   | Substitution | Nonsynonymous coding | 16% |
| MM18T | HPDL      | 4-hydroxyphenylpyruvate dioxygenase-like              | CCDS519.1       | chr1_45793412-45793412_G_A    | 198E>K  | Substitution | Nonsynonymous coding | 11% |
| MM18T | HPGD      | hydroxyprostaglandin dehydrogenase 15-(NAD)           | CCDS3821.1      | chr4_175413159-175413159_C_A  | 250G>V  | Substitution | Nonsynonymous coding | 12% |
| MM18T | HPS1      | Hermansky-Pudlak syndrome 1                           | CCDS7475.1      | chr10_100195088-100195088_C_A | 113K>N  | Substitution | Nonsynonymous coding | 15% |
| MM18T | HPS3      | Hermansky-Pudlak syndrome 3                           | CCDS3140.1      | chr3_148857971-148857971_C_T  | 133S>L  | Substitution | Nonsynonymous coding | 11% |
| MM18T | HR        | hair growth associated                                | CCDS6022.1      | chr8_21978733-21978733_C_T    | 738D>N  | Substitution | Nonsynonymous coding | 12% |
| MM18T | HS3ST2    | heparan sulfate (glucosamine) 3-O-sulfotransferase 2  | CCDS10606.1     | chr16_22826184-22826184_G_A   | 85A>T   | Substitution | Nonsynonymous coding | 19% |
| MM18T | HS3ST4    | heparan sulfate (glucosamine) 3-O-sulfotransferase 4  | NM_006040       | chr16_25704097-25704097_C_T   | 120A>V  | Substitution | Nonsynonymous coding | 17% |
| MM18T | HS3ST4    | heparan sulfate (glucosamine) 3-O-sulfotransferase 4  | NM_006040       | chr16_25704262-25704262_G_T   | 175R>I  | Substitution | Nonsynonymous coding | 16% |
| MM18T | HS6ST2    | heparan sulfate 6-O-sulfotransferase 2                | CCDS48170.1     | chrX_131762895-131762895_G_A  | 432R>C  | Substitution | Nonsynonymous coding | 16% |
| MM18T | HS6ST2    | heparan sulfate 6-O-sulfotransferase 2                | CCDS48170.1     | chrX_132092395-132092395_G_A  | 79A>V   | Substitution | Nonsynonymous coding | 13% |
| MM18T | HSD11B1   | hydroxysteroid (11-beta) dehydrogenase 1              | CCDS1489.1      | chr1_209907822-209907822_C_A  | 279L>I  | Substitution | Nonsynonymous coding | 13% |
| MM18T | HSD11B2   | hydroxysteroid (11-beta) dehydrogenase 2              | CCDS10837.1     | chr16_67469699-67469699_T_G   | 145I>S  | Substitution | Nonsynonymous coding | 13% |
| MM18T | HSD17B2   | hydroxysteroid (17-beta) dehydrogenase 2              | CCDS10936.1     | chr16_82131694-82131694_A_T   | 273S>C  | Substitution | Nonsynonymous coding | 14% |
| MM18T | HSD17B7P2 | hydroxysteroid (17-beta) dehydrogenase 7 pseudogene 2 | ENST00000356314 | chr10_38647383-38647383_T_C   | 60V>A   | Substitution | Nonsynonymous coding | 15% |
| MM18T | HSF4      | heat shock transcription factor 4                     | CCDS42175.1     | chr16_67201783-67201783_T_G   | 339F>V  | Substitution | Nonsynonymous coding | 19% |
| MM18T | HSPA12A   | heat shock 70kDa protein 12A                          | CCDS41569.1     | chr10_118439020-118439020_T_G | 427K>T  | Substitution | Nonsynonymous coding | 18% |
| MM18T | HSPA12B   | heat shock 70kDa protein 12B                          | CCDS13061.1     | chr20_3732802-3732802_C_A     | 684L>I  | Substitution | Nonsynonymous coding | 14% |
| MM18T | HSPA14    | heat shock 70kDa protein 14                           | CCDS7103.1      | chr10_14890796-14890796__A    | NA      | Insertion    | Frameshift           | 11% |
| MM18T | HSPA14    | heat shock 70kDa protein 14                           | ENST00000309584 | chr10_14885687-14885687_C_T   | 205L>F  | Substitution | Nonsynonymous coding | 15% |
| MM18T | HSPA1L    | heat shock 70kDa protein 1-like                       | CCDS34413.1     | chr6_31778142-31778142_C_A    | 536E>D  | Substitution | Nonsynonymous coding | 13% |
| MM18T | HSPA9     | heat shock 70kDa protein 9 (mortalin)                 | CCDS4208.1      | chr5_137897298-137897298_G_T  | 385L>I  | Substitution | Nonsynonymous coding | 23% |
| MM18T | HSPG2     | heparan sulfate proteoglycan 2                        | NM_005529       | chr1_22160067-22160067_T_G    | 3624N>T | Substitution | Nonsynonymous coding | 13% |
| MM18T | HSPG2     | heparan sulfate proteoglycan 2                        | NM_005529       | chr1_22161232-22161232_G_A    | 3554R>C | Substitution | Nonsynonymous coding | 11% |

|       |         |                                                                    |             |                               |         |              |                      |     |
|-------|---------|--------------------------------------------------------------------|-------------|-------------------------------|---------|--------------|----------------------|-----|
| MM18T | HSPG2   | heparan sulfate proteoglycan 2                                     | NM_005529   | chr1_22162098-22162098_G_A    | 3463T>M | Substitution | Nonsynonymous coding | 13% |
| MM18T | HSPG2   | heparan sulfate proteoglycan 2                                     | NM_005529   | chr1_22191548-22191548_C_T    | 1472D>N | Substitution | Nonsynonymous coding | 12% |
| MM18T | HSPG2   | heparan sulfate proteoglycan 2                                     | NM_005529   | chr1_22203024-22203024_G_T    | 936S>Y  | Substitution | Nonsynonymous coding | 11% |
| MM18T | HSPG2   | heparan sulfate proteoglycan 2                                     | NM_005529   | chr1_22154763-22154763_G_A    | 4132R>X | Substitution | Nonsense             | 15% |
| MM18T | HSPH1   | heat shock 105kDa/110kDa protein 1                                 | CCDS9340.1  | chr13_31727057-31727057_C_T   | 154R>Q  | Substitution | Nonsynonymous coding | 13% |
| MM18T | HTATSF1 | HIV-1 Tat specific factor 1                                        | CCDS14657.1 | chrX_135594140-135594140_C_A  | 746L>I  | Substitution | Nonsynonymous coding | 13% |
| MM18T | HTR2A   | 5-hydroxytryptamine (serotonin) receptor 2A, G protein-coupled     | CCDS9405.1  | chr13_47409732-47409732_G_A   | 219S>L  | Substitution | Nonsynonymous coding | 13% |
| MM18T | HTR3D   | 5-hydroxytryptamine (serotonin) receptor 3D, ionotropic            | CCDS46966.1 | chr3_183755887-183755887_G_A  | 199D>N  | Substitution | Nonsynonymous coding | 11% |
| MM18T | HTR4    | 5-hydroxytryptamine (serotonin) receptor 4, G protein-coupled      | CCDS34272.1 | chr5_147889346-147889346_C_T  | 250R>H  | Substitution | Nonsynonymous coding | 11% |
| MM18T | HTR4    | 5-hydroxytryptamine (serotonin) receptor 4, G protein-coupled      | CCDS34272.1 | chr5_147902848-147902848_C_T  | 139A>T  | Substitution | Nonsynonymous coding | 13% |
| MM18T | HTRA1   | HtrA serine peptidase 1                                            | CCDS7630.1  | chr10_124248426-124248426_G_T | 161D>Y  | Substitution | Nonsynonymous coding | 13% |
| MM18T | HTRA3   | HtrA serine peptidase 3                                            | CCDS3400.1  | chr4_8293134-8293134_A_G      | 249D>G  | Substitution | Nonsynonymous coding | 20% |
| MM18T | HTT     | huntingtin                                                         | CCDS43206.1 | chr4_3158813-3158813_G_A      | 1214D>N | Substitution | Nonsynonymous coding | 14% |
| MM18T | HTT     | huntingtin                                                         | CCDS43206.1 | chr4_3211675-3211675_C_T      | 2138S>L | Substitution | Nonsynonymous coding | 15% |
| MM18T | HUNK    | hormonally up-regulated Neu-associated kinase                      | CCDS13610.1 | chr21_33340580-33340580_G_A   | 298R>H  | Substitution | Nonsynonymous coding | 14% |
| MM18T | HUS1B   | HUS1 checkpoint homolog b (S. pombe)                               | CCDS4470.1  | chr6_656146-656146_C_A        | 267E>X  | Substitution | Nonsense             | 12% |
| MM18T | HUWE1   | HECT, UBA and WWE domain containing 1, E3 ubiquitin protein ligase | CCDS35301.1 | chrX_53571665-53571665_G_A    | 3703R>W | Substitution | Nonsynonymous coding | 16% |
| MM18T | HUWE1   | HECT, UBA and WWE domain containing 1, E3 ubiquitin protein ligase | CCDS35301.1 | chrX_53572053-53572053_G_A    | 3662S>F | Substitution | Nonsynonymous coding | 12% |
| MM18T | HUWE1   | HECT, UBA and WWE domain containing 1, E3 ubiquitin protein ligase | CCDS35301.1 | chrX_53574678-53574678_G_A    | 3531S>L | Substitution | Nonsynonymous coding | 11% |
| MM18T | HUWE1   | HECT, UBA and WWE domain containing 1, E3 ubiquitin protein ligase | CCDS35301.1 | chrX_53577685-53577685_G_A    | 3144R>C | Substitution | Nonsynonymous coding | 13% |
| MM18T | HUWE1   | HECT, UBA and WWE domain containing 1, E3 ubiquitin protein ligase | CCDS35301.1 | chrX_53585679-53585679_C_A    | 2699E>D | Substitution | Nonsynonymous coding | 12% |
| MM18T | HUWE1   | HECT, UBA and WWE domain containing 1, E3 ubiquitin protein ligase | CCDS35301.1 | chrX_53612097-53612097_G_A    | 1626R>C | Substitution | Nonsynonymous coding | 11% |
| MM18T | HUWE1   | HECT, UBA and WWE domain containing 1, E3 ubiquitin protein ligase | CCDS35301.1 | chrX_53631663-53631663_C_T    | 877A>T  | Substitution | Nonsynonymous coding | 13% |
| MM18T | HUWE1   | HECT, UBA and WWE domain containing 1, E3 ubiquitin protein ligase | CCDS35301.1 | chrX_53589876-53589876_C_A    | 2374E>X | Substitution | Nonsense             | 18% |
| MM18T | HYAL2   | hyaluronoglucosaminidase 2                                         | CCDS2818.1  | chr3_50357347-50357347_G_A    | 192R>C  | Substitution | Nonsynonymous coding | 14% |
| MM18T | HYLS1   | hydrolethalus syndrome 1                                           | CCDS8467.1  | chr11_125770156-125770156_C_A | 298P>H  | Substitution | Nonsynonymous coding | 16% |
| MM18T | IBA57   | IBA57, iron-sulfur cluster assembly homolog (S. cerevisiae)        | CCDS1046.1  | chr1_228363146-228363146_G_T  | 335A>S  | Substitution | Nonsynonymous coding | 12% |
| MM18T | IBTK    | inhibitor of Bruton agammaglobulinemia tyrosine kinase             | CCDS34490.1 | chr6_82904268-82904268_G_T    | 1089S>Y | Substitution | Nonsynonymous coding | 11% |
| MM18T | ICA1L   | islet cell autoantigen 1,69kDa-like                                | CCDS2354.1  | chr2_203676486-203676486_C_A  | 298S>I  | Substitution | Nonsynonymous coding | 36% |
| MM18T | ICOSLG  | inducible T-cell co-stimulator ligand                              | CCDS42952.1 | chr21_45658361-45658361_G_A   | 9L>F    | Substitution | Nonsynonymous coding | 16% |
| MM18T | IDH1    | isocitrate dehydrogenase 1 (NADP+), soluble                        | CCDS2381.1  | chr2_209108185-209108185_G_A  | 222R>C  | Substitution | Nonsynonymous coding | 10% |
| MM18T | IDS     | iduronate 2-sulfatase                                              | CCDS14685.1 | chrX_148571955-148571955_C_A  | 299S>I  | Substitution | Nonsynonymous coding | 14% |

|       |          |                                                                            |                 |                               |         |              |                      |     |
|-------|----------|----------------------------------------------------------------------------|-----------------|-------------------------------|---------|--------------|----------------------|-----|
| MM18T | IER5     | immediate early response 5                                                 | CCDS1343.1      | chr1_181058106-181058106_T_C  | 23V>A   | Substitution | Nonsynonymous coding | 20% |
| MM18T | IFI44    | interferon-induced protein 44                                              | CCDS688.1       | chr1_79116328-79116328_C_T    | 150R>X  | Substitution | Nonsense             | 12% |
| MM18T | IFI44L   | interferon-induced protein 44-like                                         | CCDS687.2       | chr1_79102826-79102826_A_G    | 329D>G  | Substitution | Nonsynonymous coding | 12% |
| MM18T | IFIT1B   | interferon-induced protein with tetratricopeptide repeats 1B               | CCDS31242.1     | chr10_91143553-91143553_G_T   | 161K>N  | Substitution | Nonsynonymous coding | 10% |
| MM18T | IFNGR2   | interferon gamma receptor 2 (interferon gamma transducer 1)                | CCDS33544.1     | chr21_34805069-34805069_C_T   | 257S>L  | Substitution | Nonsynonymous coding | 15% |
| MM18T | IFNLR1   | interferon, lambda receptor 1                                              | CCDS248.1       | chr1_24485971-24485971_C_A    | 221E>D  | Substitution | Nonsynonymous coding | 12% |
| MM18T | IFT140   | intraflagellar transport 140 homolog (Chlamydomonas)                       | CCDS10439.1     | chr16_1618222-1618222_C_A     | 589S>I  | Substitution | Nonsynonymous coding | 22% |
| MM18T | IFT172   | intraflagellar transport 172 homolog (Chlamydomonas)                       | CCDS1755.1      | chr2_27677448-27677448_A_G    | 1151F>L | Substitution | Nonsynonymous coding | 13% |
| MM18T | IFT172   | intraflagellar transport 172 homolog (Chlamydomonas)                       | CCDS1755.1      | chr2_27679461-27679461_C_A    | 1096K>N | Substitution | Nonsynonymous coding | 13% |
| MM18T | IFT172   | intraflagellar transport 172 homolog (Chlamydomonas)                       | CCDS1755.1      | chr2_27680806-27680806_T_C    | 1005T>A | Substitution | Nonsynonymous coding | 11% |
| MM18T | IFT57    | intraflagellar transport 57 homolog (Chlamydomonas)                        | CCDS2951.1      | chr3_107885727-107885727_G_A  | 319R>C  | Substitution | Nonsynonymous coding | 13% |
| MM18T | IFT88    | intraflagellar transport 88 homolog (Chlamydomonas)                        | CCDS31944.1     | chr13_21173679-21173679_G_T   | 272V>F  | Substitution | Nonsynonymous coding | 12% |
| MM18T | IGDCC3   | immunoglobulin superfamily, DCC subclass, member 3                         | CCDS10205.1     | chr15_65621353-65621353_G_A   | 780A>V  | Substitution | Nonsynonymous coding | 14% |
| MM18T | IGF1R    | insulin-like growth factor 1 receptor                                      | CCDS10378.1     | chr15_99442787-99442787_C_T   | 395A>V  | Substitution | Nonsynonymous coding | 13% |
| MM18T | IGF1R    | insulin-like growth factor 1 receptor                                      | CCDS10378.1     | chr15_99459229-99459229_A_G   | 622N>S  | Substitution | Nonsynonymous coding | 15% |
| MM18T | IGF2R    | insulin-like growth factor 2 receptor                                      | CCDS5273.1      | chr6_160461711-160461711_G_A  | 479D>N  | Substitution | Nonsynonymous coding | 11% |
| MM18T | IGF2R    | insulin-like growth factor 2 receptor                                      | CCDS5273.1      | chr6_160481662-160481662_G_A  | 1059D>N | Substitution | Nonsynonymous coding | 15% |
| MM18T | IGF2R    | insulin-like growth factor 2 receptor                                      | CCDS5273.1      | chr6_160494493-160494493_G_A  | 1647E>K | Substitution | Nonsynonymous coding | 15% |
| MM18T | IGFBP1   | insulin-like growth factor binding protein 1                               | CCDS5504.1      | chr7_45928534-45928534_C_G    | 95H>D   | Substitution | Nonsynonymous coding | 22% |
| MM18T | IGFBP1   | insulin-like growth factor binding protein 1                               | CCDS5504.1      | chr7_45931597-45931597_G_T    | 196E>X  | Substitution | Nonsense             | 18% |
| MM18T | IGFBP2   | insulin-like growth factor binding protein 2, 36kDa                        | CCDS42815.1     | chr2_217525288-217525288_G_A  | 151D>N  | Substitution | Nonsynonymous coding | 11% |
| MM18T | IGFBP2   | insulin-like growth factor binding protein 2, 36kDa                        | CCDS42815.1     | chr2_217525291-217525291_G_T  | 152D>Y  | Substitution | Nonsynonymous coding | 12% |
| MM18T | IGFN1    | immunoglobulin-like and fibronectin type III domain containing 1           | NM_001164586    | chr1_201170908-201170908_T_G  | 232F>C  | Substitution | Nonsynonymous coding | 14% |
| MM18T | IGHE     | immunoglobulin heavy constant epsilon                                      | ENST00000390540 | chr14_106067794-106067794_G_T | 91H>N   | Substitution | Nonsynonymous coding | 15% |
| MM18T | IGHV1-46 | immunoglobulin heavy variable 1-46                                         | ENST00000390622 | chr14_106967354-106967354_C_A | ISV-1>  | Substitution | Splice site acceptor | 14% |
| MM18T | IGLON5   | IgLON family member 5                                                      | CCDS46158.1     | chr19_51830363-51830363_G_A   | 226A>T  | Substitution | Nonsynonymous coding | 24% |
| MM18T | IGSF21   | immunoglobulin superfamily, member 21                                      | CCDS184.1       | chr1_18702872-18702872_C_A    | 362L>M  | Substitution | Nonsynonymous coding | 14% |
| MM18T | IGSF23   | immunoglobulin superfamily, member 23                                      | ENST00000428245 | chr19_45121389-45121389_G_A   | 22R>H   | Substitution | Nonsynonymous coding | 19% |
| MM18T | IKBKB    | inhibitor of kappa light polypeptide gene enhancer in B-cells, kinase beta | CCDS6128.1      | chr8_42176098-42176098_C_A    | 423F>L  | Substitution | Nonsynonymous coding | 14% |
| MM18T | IKBKB    | inhibitor of kappa light polypeptide gene enhancer in B-cells, kinase beta | CCDS6128.1      | chr8_42179649-42179649_C_T    | 606R>X  | Substitution | Nonsense             | 15% |
| MM18T | IKZF3    | IKAROS family zinc finger 3 (Aiolos)                                       | CCDS11346.1     | chr17_37949078-37949078_C_A   | 91R>I   | Substitution | Nonsynonymous coding | 18% |
| MM18T | IKZF5    | IKAROS family zinc finger 5 (Pegasus)                                      | CCDS41574.1     | chr10_124753831-124753831_T_C | 242D>G  | Substitution | Nonsynonymous coding | 16% |

|       |         |                                                                |                 |                               |         |              |                      |     |
|-------|---------|----------------------------------------------------------------|-----------------|-------------------------------|---------|--------------|----------------------|-----|
| MM18T | IL12RB1 | interleukin 12 receptor, beta 1                                | CCDS32957.1     | chr19_18191780-18191780_C_T   | 91A>T   | Substitution | Nonsynonymous coding | 11% |
| MM18T | IL13RA1 | interleukin 13 receptor, alpha 1                               | ENST00000371637 | chrX_117904555-117904555_C_T  | 110R>W  | Substitution | Nonsynonymous coding | 13% |
| MM18T | IL13RA1 | interleukin 13 receptor, alpha 1                               | CCDS14573.1     | chrX_117881052-117881052_G_T  | 122E>X  | Substitution | Nonsense             | 17% |
| MM18T | IL17A   | interleukin 17A                                                | CCDS4937.1      | chr6_52052459-52052459_G_A    | 29R>Q   | Substitution | Nonsynonymous coding | 18% |
| MM18T | IL17D   | interleukin 17D                                                | CCDS9292.1      | chr13_21295798-21295798_A_C   | 105Y>S  | Substitution | Nonsynonymous coding | 27% |
| MM18T | IL17F   | interleukin 17F                                                | CCDS4938.1      | chr6_52103580-52103580_C_T    | 68V>I   | Substitution | Nonsynonymous coding | 15% |
| MM18T | IL17RE  | interleukin 17 receptor E                                      | CCDS2589.1      | chr3_9950937-9950937_A_C      | 258K>Q  | Substitution | Nonsynonymous coding | 14% |
| MM18T | IL17REL | interleukin 17 receptor E-like                                 | CCDS33679.1     | chr22_50436711-50436711_T_C   | 210D>G  | Substitution | Nonsynonymous coding | 10% |
| MM18T | IL18R1  | interleukin 18 receptor 1                                      | CCDS2060.1      | chr2_102984351-102984351_C_T  | 42S>L   | Substitution | Nonsynonymous coding | 13% |
| MM18T | IL18RAP | interleukin 18 receptor accessory protein                      | CCDS2061.1      | chr2_103068258-103068258_A_G  | 473R>G  | Substitution | Nonsynonymous coding | 11% |
| MM18T | IL20RA  | interleukin 20 receptor, alpha                                 | CCDS5181.1      | chr6_137323389-137323389_G_T  | 323S>Y  | Substitution | Nonsynonymous coding | 19% |
| MM18T | IL31RA  | interleukin 31 receptor A                                      | CCDS3970.2      | chr5_55209317-55209317_T_G    | 552I>S  | Substitution | Nonsynonymous coding | 12% |
| MM18T | IL33    | interleukin 33                                                 | CCDS6468.1      | chr9_6254556-6254556_A_       | NA      | Deletion     | Splice site donor    | 18% |
| MM18T | IL36A   | interleukin 36, alpha                                          | CCDS42734.1     | chr2_113765576-113765576_G_   | NA      | Deletion     | Frameshift           | 11% |
| MM18T | IL36G   | interleukin 36, gamma                                          | CCDS2108.1      | chr2_113736238-113736238_C_T  | 8A>V    | Substitution | Nonsynonymous coding | 11% |
| MM18T | IL6ST   | interleukin 6 signal transducer (gp130, oncostatin M receptor) | CCDS3971.1      | chr5_55243391-55243391_C_T    | 623V>M  | Substitution | Nonsynonymous coding | 13% |
| MM18T | IL6ST   | interleukin 6 signal transducer (gp130, oncostatin M receptor) | CCDS3971.1      | chr5_55250759-55250759_C_A    | 443W>C  | Substitution | Nonsynonymous coding | 11% |
| MM18T | IMMT    | inner membrane protein, mitochondrial                          | CCDS46355.1     | chr2_86398441-86398441_G_T    | 150S>Y  | Substitution | Nonsynonymous coding | 11% |
| MM18T | IMP4    | IMP4, U3 small nucleolar ribonucleoprotein, homolog (yeast)    | CCDS2160.1      | chr2_131103180-131103180_G_A  | 116R>Q  | Substitution | Nonsynonymous coding | 18% |
| MM18T | IMPA1   | inositol(myo)-1(or 4)-monophosphatase 1                        | CCDS47883.1     | chr8_82571677-82571677_C_T    | 307R>Q  | Substitution | Nonsynonymous coding | 14% |
| MM18T | IMP2    | interphotorceptor matrix proteoglycan 2                        | CCDS2940.1      | chr3_100963309-100963309_C_A  | 622E>D  | Substitution | Nonsynonymous coding | 11% |
| MM18T | INA     | internexin neuronal intermediate filament protein, alpha       | CCDS7545.1      | chr10_105046812-105046812_G_T | 362E>D  | Substitution | Nonsynonymous coding | 13% |
| MM18T | INADL   | InaD-like (Drosophila)                                         | CCDS617.2       | chr1_62288749-62288749_G_T    | 606E>X  | Substitution | Nonsense             | 12% |
| MM18T | INH1    | inhibin, alpha                                                 | CCDS2444.1      | chr2_220439914-220439914_C_T  | 256P>L  | Substitution | Nonsynonymous coding | 11% |
| MM18T | INO80B  | INO80 complex subunit B                                        | CCDS1942.2      | chr2_74684914-74684914_C_A    | 332L>I  | Substitution | Nonsynonymous coding | 13% |
| MM18T | INO80B  | INO80 complex subunit B                                        | ENST00000428943 | chr2_74686062-74686062_G_A    | 22G>S   | Substitution | Nonsynonymous coding | 13% |
| MM18T | INO80D  | INO80 complex subunit D                                        | CCDS46500.1     | chr2_206921348-206921348_G_A  | 180R>C  | Substitution | Nonsynonymous coding | 11% |
| MM18T | INPP4A  | inositol polyphosphate-4-phosphatase, type I, 107kDa           | CCDS46369.1     | chr2_99181109-99181109_G_A    | 684A>T  | Substitution | Nonsynonymous coding | 19% |
| MM18T | INPP4B  | inositol polyphosphate-4-phosphatase, type II, 105kDa          | CCDS3757.1      | chr4_143007362-143007362_T_G  | 808N>H  | Substitution | Nonsynonymous coding | 11% |
| MM18T | INPP5D  | inositol polyphosphate-5-phosphatase, 145kDa                   | ENST00000359570 | chr2_234112922-234112922_G_A  | 1042M>I | Substitution | Nonsynonymous coding | 15% |
| MM18T | INPP5F  | inositol polyphosphate-5-phosphatase F                         | CCDS7616.1      | chr10_121569660-121569660_G_T | 540D>Y  | Substitution | Nonsynonymous coding | 12% |
| MM18T | INPP5F  | inositol polyphosphate-5-phosphatase F                         | CCDS7616.1      | chr10_121582640-121582640_G_A | 697R>K  | Substitution | Nonsynonymous coding | 15% |

|       |         |                                                           |             |                               |         |              |                      |     |
|-------|---------|-----------------------------------------------------------|-------------|-------------------------------|---------|--------------|----------------------|-----|
| MM18T | INPP5F  | inositol polyphosphate-5-phosphatase F                    | CCDS7616.1  | chr10_121586558-121586558_C_A | 889L>I  | Substitution | Nonsynonymous coding | 14% |
| MM18T | INSM1   | insulinoma-associated 1                                   | CCDS13143.1 | chr20_20350239-20350239_G_T   | 443C>F  | Substitution | Nonsynonymous coding | 12% |
| MM18T | INSR    | insulin receptor                                          | CCDS12176.1 | chr19_7163064-7163064_C_T     | 670E>K  | Substitution | Nonsynonymous coding | 13% |
| MM18T | INTS1   | integrator complex subunit 1                              | CCDS47526.1 | chr7_1511963-1511963_C_T      | 2044A>T | Substitution | Nonsynonymous coding | 22% |
| MM18T | INTS1   | integrator complex subunit 1                              | CCDS47526.1 | chr7_1516529-1516529_G_A      | 1655S>L | Substitution | Nonsynonymous coding | 18% |
| MM18T | INTS1   | integrator complex subunit 1                              | CCDS47526.1 | chr7_1523742-1523742_G_A      | 1109P>L | Substitution | Nonsynonymous coding | 19% |
| MM18T | INTS2   | integrator complex subunit 2                              | CCDS45750.1 | chr17_59967231-59967231_G_A   | 642R>C  | Substitution | Nonsynonymous coding | 12% |
| MM18T | IP6K3   | inositol hexakisphosphate kinase 3                        | CCDS34435.1 | chr6_33694508-33694508_G_A    | 197R>W  | Substitution | Nonsynonymous coding | 11% |
| MM18T | IP6K3   | inositol hexakisphosphate kinase 3                        | CCDS34435.1 | chr6_33693366-33693366_G_T    | 206S>X  | Substitution | Nonsense             | 12% |
| MM18T | IPO4    | importin 4                                                | CCDS9616.1  | chr14_24651600-24651600_C_T   | 828D>N  | Substitution | Nonsynonymous coding | 14% |
| MM18T | IPO4    | importin 4                                                | CCDS9616.1  | chr14_24654460-24654460_G_A   | 446S>L  | Substitution | Nonsynonymous coding | 10% |
| MM18T | IPO5    | importin 5                                                | CCDS31999.1 | chr13_98652867-98652867_T_C   | 377I>T  | Substitution | Nonsynonymous coding | 17% |
| MM18T | IPO9    | importin 9                                                | CCDS1415.1  | chr1_201842065-201842065_C_T  | 896R>C  | Substitution | Nonsynonymous coding | 23% |
| MM18T | IPPK    | inositol 1,3,4,5,6-pentakisphosphate 2-kinase             | CCDS6699.1  | chr9_95400319-95400319_C_T    | 294E>K  | Substitution | Nonsynonymous coding | 30% |
| MM18T | IQCA1   | IQ motif containing with AAA domain 1                     | CCDS46549.1 | chr2_237415906-237415906_G_A  | 2S>L    | Substitution | Nonsynonymous coding | 10% |
| MM18T | IQCB1   | IQ motif containing B1                                    | CCDS33837.1 | chr3_121500618-121500618_C_T  | 461R>Q  | Substitution | Nonsynonymous coding | 20% |
| MM18T | IQCC    | IQ motif containing C                                     | CCDS355.1   | chr1_32673049-32673049_G_T    | 256R>I  | Substitution | Nonsynonymous coding | 13% |
| MM18T | IQCF1   | IQ motif containing F1                                    | CCDS2836.1  | chr3_51929216-51929216_C_T    | 103R>Q  | Substitution | Nonsynonymous coding | 11% |
| MM18T | IQCH    | IQ motif containing H                                     | CCDS32273.1 | chr15_67629323-67629323_C_T   | 133S>L  | Substitution | Nonsynonymous coding | 18% |
| MM18T | IQCH    | IQ motif containing H                                     | CCDS32273.1 | chr15_67757477-67757477_G_A   | 840G>S  | Substitution | Nonsynonymous coding | 11% |
| MM18T | IQGAP1  | IQ motif containing GTPase activating protein 1           | CCDS10362.1 | chr15_91034681-91034681_G_T   | 1455K>N | Substitution | Nonsynonymous coding | 15% |
| MM18T | IQGAP2  | IQ motif containing GTPase activating protein 2           | CCDS34188.1 | chr5_75884774-75884774_T_G    | 168L>V  | Substitution | Nonsynonymous coding | 19% |
| MM18T | IQGAP2  | IQ motif containing GTPase activating protein 2           | CCDS34188.1 | chr5_75996960-75996960_C_T    | 1476A>V | Substitution | Nonsynonymous coding | 16% |
| MM18T | IQSEC2  | IQ motif and Sec7 domain 2                                | CCDS48130.1 | chrX_53272626-53272626_C_T    | 926R>Q  | Substitution | Nonsynonymous coding | 15% |
| MM18T | IQSEC3  | IQ motif and Sec7 domain 3 [Source:HGNC Symbol;Acc:29193] | CCDS31725.1 | chr12_247703-247703_G_A       | 89A>T   | Substitution | Nonsynonymous coding | 15% |
| MM18T | IQUB    | IQ motif and ubiquitin domain containing                  | CCDS5787.1  | chr7_123152325-123152325_A_C  | 24F>V   | Substitution | Nonsynonymous coding | 10% |
| MM18T | IRAK1   | interleukin-1 receptor-associated kinase 1                | CCDS14740.1 | chrX_153283567-153283567_G_A  | 267R>C  | Substitution | Nonsynonymous coding | 17% |
| MM18T | IRAK4   | interleukin-1 receptor-associated kinase 4                | CCDS8744.1  | chr12_44161948-44161948_C_T   | 12R>C   | Substitution | Nonsynonymous coding | 11% |
| MM18T | IREB2   | iron-responsive element binding protein 2                 | CCDS10302.1 | chr15_78789601-78789601_T_G   | 910F>C  | Substitution | Nonsynonymous coding | 12% |
| MM18T | IRF2    | interferon regulatory factor 2                            | CCDS3835.1  | chr4_185340691-185340691_T_C  | 40H>R   | Substitution | Nonsynonymous coding | 13% |
| MM18T | IRF2BPL | interferon regulatory factor 2 binding protein-like       | CCDS9854.1  | chr14_77491978-77491978_C_T   | 720E>K  | Substitution | Nonsynonymous coding | 14% |
| MM18T | IRF2BPL | interferon regulatory factor 2 binding protein-like       | CCDS9854.1  | chr14_77492890-77492890_C_T   | 416E>K  | Substitution | Nonsynonymous coding | 15% |

|       |       |                                                                             |             |                               |         |              |                      |     |
|-------|-------|-----------------------------------------------------------------------------|-------------|-------------------------------|---------|--------------|----------------------|-----|
| MM18T | IRF3  | interferon regulatory factor 3                                              | CCDS12775.1 | chr19_50165248-50165248_C_A   | 313K>N  | Substitution | Nonsynonymous coding | 12% |
| MM18T | IRF6  | interferon regulatory factor 6                                              | CCDS1492.1  | chr1_209964151-209964151_C_T  | 250R>Q  | Substitution | Nonsynonymous coding | 13% |
| MM18T | IRF8  | interferon regulatory factor 8                                              | CCDS10956.1 | chr16_85942753-85942753_G_A   | 111R>Q  | Substitution | Nonsynonymous coding | 10% |
| MM18T | IRS2  | insulin receptor substrate 2                                                | CCDS9510.1  | chr13_110434476-110434476_G_A | 1309P>S | Substitution | Nonsynonymous coding | 11% |
| MM18T | IRS2  | insulin receptor substrate 2                                                | CCDS9510.1  | chr13_110436045-110436045_C_T | 786A>T  | Substitution | Nonsynonymous coding | 14% |
| MM18T | IRS2  | insulin receptor substrate 2                                                | CCDS9510.1  | chr13_110437989-110437989_C_T | 138A>T  | Substitution | Nonsynonymous coding | 18% |
| MM18T | IRS2  | insulin receptor substrate 2                                                | CCDS9510.1  | chr13_110438181-110438181_C_T | 74E>K   | Substitution | Nonsynonymous coding | 11% |
| MM18T | IRS4  | insulin receptor substrate 4                                                | CCDS14544.1 | chrX_107975806-107975806_G_A  | 1257R>W | Substitution | Nonsynonymous coding | 25% |
| MM18T | IRS4  | insulin receptor substrate 4                                                | CCDS14544.1 | chrX_107978835-107978835_C_A  | 247R>I  | Substitution | Nonsynonymous coding | 16% |
| MM18T | IRX2  | iroquois homeobox 2                                                         | CCDS3868.1  | chr5_2748965-2748965_G_A      | 286S>L  | Substitution | Nonsynonymous coding | 16% |
| MM18T | IRX2  | iroquois homeobox 2                                                         | CCDS3868.1  | chr5_2749071-2749071_C_T      | 251E>K  | Substitution | Nonsynonymous coding | 17% |
| MM18T | IRX4  | iroquois homeobox 4                                                         | CCDS3867.1  | chr5_1878340-1878340_G_T      | 435L>I  | Substitution | Nonsynonymous coding | 17% |
| MM18T | IRX5  | iroquois homeobox 5                                                         | CCDS10751.1 | chr16_54967021-54967021_G_A   | 230E>K  | Substitution | Nonsynonymous coding | 29% |
| MM18T | IRX6  | iroquois homeobox 6                                                         | CCDS32449.1 | chr16_55360365-55360365_C_T   | 55R>X   | Substitution | Nonsense             | 10% |
| MM18T | ISL2  | ISL LIM homeobox 2                                                          | CCDS10290.1 | chr15_76632849-76632849_G_T   | 248K>N  | Substitution | Nonsynonymous coding | 10% |
| MM18T | ISM1  | isthmin 1 homolog (zebrafish)                                               | CCDS46579.1 | chr20_13269234-13269234_G_A   | 231V>I  | Substitution | Nonsynonymous coding | 17% |
| MM18T | ITGA2 | integrin, alpha 2 (CD49B, alpha 2 subunit of VLA-2 receptor)                | CCDS3957.1  | chr5_52344560-52344560_A_C    | 197K>T  | Substitution | Nonsynonymous coding | 11% |
| MM18T | ITGA3 | integrin, alpha 3 (antigen CD49C, alpha 3 subunit of VLA-3 receptor)        | CCDS11557.1 | chr17_48141969-48141969_C_A   | 138L>M  | Substitution | Nonsynonymous coding | 13% |
| MM18T | ITGA3 | integrin, alpha 3 (antigen CD49C, alpha 3 subunit of VLA-3 receptor)        | CCDS11557.1 | chr17_48166531-48166531_C_T   | 1035R>W | Substitution | Nonsynonymous coding | 14% |
| MM18T | ITGA5 | integrin, alpha 5 (fibronectin receptor, alpha polypeptide)                 | CCDS8880.1  | chr12_54791193-54791193_A_C   | 1008F>V | Substitution | Nonsynonymous coding | 12% |
| MM18T | ITGA7 | integrin, alpha 7                                                           | CCDS8888.1  | chr12_56087033-56087033_C_A   | 868E>D  | Substitution | Nonsynonymous coding | 12% |
| MM18T | ITGAE | integrin, alpha E (antigen CD103, human mucosal lymphocyte antigen 1; alpha | CCDS32531.1 | chr17_3643160-3643160_T_G     | 821K>Q  | Substitution | Nonsynonymous coding | 14% |
| MM18T | ITGAE | integrin, alpha E (antigen CD103, human mucosal lymphocyte antigen 1; alpha | CCDS32531.1 | chr17_3660419-3660419_C_T     | 344E>K  | Substitution | Nonsynonymous coding | 10% |
| MM18T | ITGAE | integrin, alpha E (antigen CD103, human mucosal lymphocyte antigen 1; alpha | CCDS32531.1 | chr17_3665217-3665217_C_T     | 103G>S  | Substitution | Nonsynonymous coding | 13% |
| MM18T | ITGAM | integrin, alpha M (complement component 3 receptor 3 subunit)               | CCDS45470.1 | chr16_31335807-31335807_G_T   | 697S>I  | Substitution | Nonsynonymous coding | 12% |
| MM18T | ITGAV | integrin, alpha V                                                           | CCDS2292.1  | chr2_187531472-187531472_G_T  | 736E>D  | Substitution | Nonsynonymous coding | 13% |
| MM18T | ITGB4 | integrin, beta 4                                                            | CCDS11727.1 | chr17_73732450-73732450_G_A   | 615E>K  | Substitution | Nonsynonymous coding | 18% |
| MM18T | ITGB4 | integrin, beta 4                                                            | CCDS11727.1 | chr17_73746327-73746327_C_A   | 1151S>Y | Substitution | Nonsynonymous coding | 14% |
| MM18T | ITGB8 | integrin, beta 8                                                            | CCDS5370.1  | chr7_20441527-20441527_T_G    | 489S>A  | Substitution | Nonsynonymous coding | 15% |
| MM18T | ITGB8 | integrin, beta 8                                                            | CCDS5370.1  | chr7_20421371-20421371_G_T    | 275E>X  | Substitution | Nonsense             | 12% |
| MM18T | ITGB8 | integrin, beta 8                                                            | CCDS5370.1  | chr7_20444307-20444307_C_T    | 582R>X  | Substitution | Nonsense             | 19% |
| MM18T | ITIH4 | inter-alpha-trypsin inhibitor heavy chain family, member 4                  | CCDS2865.1  | chr3_52860854-52860854_C_T    | 158E>K  | Substitution | Nonsynonymous coding | 14% |

|       |          |                                                                  |             |                               |         |              |                      |     |
|-------|----------|------------------------------------------------------------------|-------------|-------------------------------|---------|--------------|----------------------|-----|
| MM18T | ITIH4    | inter-alpha-trypsin inhibitor heavy chain family, member 4       | CCDS2865.1  | chr3_52863286-52863286_C_T    | 34D>N   | Substitution | Nonsynonymous coding | 17% |
| MM18T | ITIH6    | inter-alpha-trypsin inhibitor heavy chain family, member 6       | CCDS14361.1 | chrX_54777535-54777535_G_A    | 1211R>X | Substitution | Nonsense             | 14% |
| MM18T | ITPK1    | inositol-tetrakisphosphate 1-kinase                              | CCDS9907.1  | chr14_93408232-93408232_C_T   | 307E>K  | Substitution | Nonsynonymous coding | 16% |
| MM18T | ITPKA    | inositol-trisphosphate 3-kinase A                                | CCDS10076.1 | chr15_41794314-41794314_G_A   | 308R>H  | Substitution | Nonsynonymous coding | 26% |
| MM18T | ITPR2    | inositol 1,4,5-trisphosphate receptor, type 2                    | CCDS41764.1 | chr12_26639058-26639058_C_A   | 1930E>D | Substitution | Nonsynonymous coding | 12% |
| MM18T | ITPR2    | inositol 1,4,5-trisphosphate receptor, type 2                    | CCDS41764.1 | chr12_26774199-26774199_C_A   | 1107D>Y | Substitution | Nonsynonymous coding | 10% |
| MM18T | ITPR2    | inositol 1,4,5-trisphosphate receptor, type 2                    | CCDS41764.1 | chr12_26774202-26774202_C_T   | 1106V>I | Substitution | Nonsynonymous coding | 10% |
| MM18T | ITPR2    | inositol 1,4,5-trisphosphate receptor, type 2                    | CCDS41764.1 | chr12_26784977-26784977_C_T   | 919R>K  | Substitution | Nonsynonymous coding | 14% |
| MM18T | ITPR2    | inositol 1,4,5-trisphosphate receptor, type 2                    | CCDS41764.1 | chr12_26878609-26878609_C_T   | 85E>K   | Substitution | Nonsynonymous coding | 11% |
| MM18T | ITPR3    | inositol 1,4,5-trisphosphate receptor, type 3                    | CCDS4783.1  | chr6_33636335-33636335_G_A    | 644A>T  | Substitution | Nonsynonymous coding | 14% |
| MM18T | ITPR3    | inositol 1,4,5-trisphosphate receptor, type 3                    | CCDS4783.1  | chr6_33652628-33652628_G_A    | 1739D>N | Substitution | Nonsynonymous coding | 15% |
| MM18T | ITPR3    | inositol 1,4,5-trisphosphate receptor, type 3                    | CCDS4783.1  | chr6_33652700-33652700_G_A    | 1763G>S | Substitution | Nonsynonymous coding | 13% |
| MM18T | ITPR3    | inositol 1,4,5-trisphosphate receptor, type 3                    | CCDS4783.1  | chr6_33653494-33653494_G_A    | 1853E>K | Substitution | Nonsynonymous coding | 21% |
| MM18T | ITPR3    | inositol 1,4,5-trisphosphate receptor, type 3                    | CCDS4783.1  | chr6_33662848-33662848_G_A    | 2645E>K | Substitution | Nonsynonymous coding | 21% |
| MM18T | ITPR3    | inositol 1,4,5-trisphosphate receptor, type 3                    | CCDS4783.1  | chr6_33623666-33623666_T_C    | ISV+2>  | Substitution | Splice site donor    | 19% |
| MM18T | ITPRIPL1 | inositol 1,4,5-trisphosphate receptor interacting protein-like 1 | CCDS33250.1 | chr2_96992942-96992942_G_T    | 199E>D  | Substitution | Nonsynonymous coding | 16% |
| MM18T | ITPRIPL1 | inositol 1,4,5-trisphosphate receptor interacting protein-like 1 | CCDS33250.1 | chr2_96993097-96993097_C_T    | 251P>L  | Substitution | Nonsynonymous coding | 14% |
| MM18T | ITSN1    | intersectin 1 (SH3 domain protein)                               | CCDS33545.1 | chr21_35124131-35124131_G_T   | 181K>N  | Substitution | Nonsynonymous coding | 14% |
| MM18T | ITSN2    | intersectin 2                                                    | CCDS1710.2  | chr2_24443912-24443912_C_A    | 1201D>Y | Substitution | Nonsynonymous coding | 17% |
| MM18T | JAG1     | jagged 1                                                         | CCDS13112.1 | chr20_10626098-10626098_C_A   | 673Q>H  | Substitution | Nonsynonymous coding | 11% |
| MM18T | JAG2     | jagged 2                                                         | CCDS9998.1  | chr14_105612156-105612156_G_A | 955P>L  | Substitution | Nonsynonymous coding | 19% |
| MM18T | JAG2     | jagged 2                                                         | CCDS9998.1  | chr14_105617047-105617047_C_T | 499R>Q  | Substitution | Nonsynonymous coding | 19% |
| MM18T | JAK2     | Janus kinase 2                                                   | CCDS6457.1  | chr9_5054592-5054592_G_A      | 215R>Q  | Substitution | Nonsynonymous coding | 17% |
| MM18T | JAK2     | Janus kinase 2                                                   | CCDS6457.1  | chr9_5090542-5090542_T_A      | 953L>H  | Substitution | Nonsynonymous coding | 20% |
| MM18T | JAK2     | Janus kinase 2                                                   | CCDS6457.1  | chr9_5080656-5080656_C_T      | 803R>X  | Substitution | Nonsense             | 20% |
| MM18T | JAKMIP1  | janus kinase and microtubule interacting protein 1               | CCDS47005.1 | chr4_6107391-6107391_C_T      | 145D>N  | Substitution | Nonsynonymous coding | 20% |
| MM18T | JAKMIP2  | janus kinase and microtubule interacting protein 2               | CCDS4285.1  | chr5_147024496-147024496_C_T  | 334A>T  | Substitution | Nonsynonymous coding | 11% |
| MM18T | JAKMIP2  | janus kinase and microtubule interacting protein 2               | CCDS4285.1  | chr5_147029918-147029918_C_T  | 274E>K  | Substitution | Nonsynonymous coding | 16% |
| MM18T | JARID2   | jumonji, AT rich interactive domain 2                            | CCDS4533.1  | chr6_15410596-15410596_G_T    | 108R>M  | Substitution | Nonsynonymous coding | 13% |
| MM18T | JARID2   | jumonji, AT rich interactive domain 2                            | CCDS4533.1  | chr6_15487747-15487747_C_T    | 294R>W  | Substitution | Nonsynonymous coding | 18% |
| MM18T | JMJD1C   | jumonji domain containing 1C                                     | CCDS41532.1 | chr10_64974824-64974824_C_T   | 368R>Q  | Substitution | Nonsynonymous coding | 14% |
| MM18T | JMY      | junction mediating and regulatory protein, p53 cofactor          | CCDS4047.3  | chr5_78573862-78573862_C_T    | 388R>X  | Substitution | Nonsense             | 11% |



|       |         |                                                                                       |             |                               |         |              |                      |     |
|-------|---------|---------------------------------------------------------------------------------------|-------------|-------------------------------|---------|--------------|----------------------|-----|
| MM18T | JPH1    | junctophilin 1                                                                        | CCDS6217.1  | chr8_75156786-75156786_G_A    | 628A>V  | Substitution | Nonsynonymous coding | 13% |
| MM18T | JPH2    | junctophilin 2                                                                        | CCDS13325.1 | chr20_42744559-42744559_C_T   | 586E>K  | Substitution | Nonsynonymous coding | 19% |
| MM18T | JPH4    | junctophilin 4                                                                        | CCDS9603.1  | chr14_24040622-24040622_C_T   | 440D>N  | Substitution | Nonsynonymous coding | 13% |
| MM18T | KAL1    | Kallmann syndrome 1 sequence                                                          | CCDS14130.1 | chrX_8538609-8538609_A_C      | 331F>L  | Substitution | Nonsynonymous coding | 13% |
| MM18T | KALRN   | kalirin, RhoGEF kinase                                                                | CCDS3027.1  | chr3_124153319-124153319_G_T  | 997D>Y  | Substitution | Nonsynonymous coding | 11% |
| MM18T | KAT2B   | K(lysine) acetyltransferase 2B                                                        | CCDS2634.1  | chr3_20194016-20194016_G_T    | 833*>L  | Substitution | Nonsynonymous coding | 12% |
| MM18T | KAT6A   | K(lysine) acetyltransferase 6A                                                        | CCDS6124.1  | chr8_41791516-41791516_C_T    | 1408E>K | Substitution | Nonsynonymous coding | 15% |
| MM18T | KAT6B   | K(lysine) acetyltransferase 6B                                                        | CCDS7345.1  | chr10_76790671-76790671_C_T   | 2030T>I | Substitution | Nonsynonymous coding | 14% |
| MM18T | KAT6B   | K(lysine) acetyltransferase 6B                                                        | CCDS7345.1  | chr10_76741651-76741651_G_T   | 780E>X  | Substitution | Nonsense             | 13% |
| MM18T | KAT7    | K(lysine) acetyltransferase 7                                                         | CCDS11554.1 | chr17_47888927-47888927_G_T   | 281E>D  | Substitution | Nonsynonymous coding | 12% |
| MM18T | KAT7    | K(lysine) acetyltransferase 7                                                         | CCDS11554.1 | chr17_47898742-47898742_G_A   | 400R>H  | Substitution | Nonsynonymous coding | 18% |
| MM18T | KAT8    | K(lysine) acetyltransferase 8                                                         | CCDS45468.1 | chr16_31141388-31141388_G_T   | 274K>N  | Substitution | Nonsynonymous coding | 15% |
| MM18T | KBTBD11 | kelch repeat and BTB (POZ) domain containing 11                                       | CCDS34795.1 | chr8_1950732-1950732_G_T      | 458E>D  | Substitution | Nonsynonymous coding | 11% |
| MM18T | KBTBD12 | kelch repeat and BTB (POZ) domain containing 12                                       | CCDS33848.2 | chr3_127642949-127642949_A_C  | 349K>Q  | Substitution | Nonsynonymous coding | 13% |
| MM18T | KBTBD12 | kelch repeat and BTB (POZ) domain containing 12                                       | CCDS33848.2 | chr3_127649076-127649076_C_A  | 481S>Y  | Substitution | Nonsynonymous coding | 13% |
| MM18T | KBTBD12 | kelch repeat and BTB (POZ) domain containing 12                                       | CCDS33848.2 | chr3_127703069-127703069_G_A  | 607R>Q  | Substitution | Nonsynonymous coding | 16% |
| MM18T | KBTBD13 | kelch repeat and BTB (POZ) domain containing 13                                       | CCDS45281.1 | chr15_65369853-65369853_G_A   | 234D>N  | Substitution | Nonsynonymous coding | 19% |
| MM18T | KBTBD2  | kelch repeat and BTB (POZ) domain containing 2                                        | CCDS34614.1 | chr7_32909526-32909526_T_G    | 435T>P  | Substitution | Nonsynonymous coding | 10% |
| MM18T | KBTBD2  | kelch repeat and BTB (POZ) domain containing 2                                        | CCDS34614.1 | chr7_32910137-32910137_C_A    | 231R>I  | Substitution | Nonsynonymous coding | 12% |
| MM18T | KBTBD3  | kelch repeat and BTB (POZ) domain containing 3                                        | CCDS8334.1  | chr11_105923809-105923809_G_T | 536S>Y  | Substitution | Nonsynonymous coding | 11% |
| MM18T | KCNA1   | potassium voltage-gated channel, shaker-related subfamily, member 1 (episodic ataxia) | CCDS8535.1  | chr12_5020582-5020582_C_T     | 13S>L   | Substitution | Nonsynonymous coding | 27% |
| MM18T | KCNA3   | potassium voltage-gated channel, shaker-related subfamily, member 3                   | CCDS828.2   | chr1_111217299-111217299_C_T  | 45A>T   | Substitution | Nonsynonymous coding | 17% |
| MM18T | KCNA4   | potassium voltage-gated channel, shaker-related subfamily, member 4                   | CCDS41629.1 | chr11_30033394-30033394_C_A   | 278E>X  | Substitution | Nonsense             | 12% |
| MM18T | KCNA5   | potassium voltage-gated channel, shaker-related subfamily, member 5                   | CCDS8536.1  | chr12_5154307-5154307_G_A     | 332V>I  | Substitution | Nonsynonymous coding | 15% |
| MM18T | KCNA5   | potassium voltage-gated channel, shaker-related subfamily, member 5                   | CCDS8536.1  | chr12_5154705-5154705_C_A     | 464F>L  | Substitution | Nonsynonymous coding | 15% |
| MM18T | KCNA6   | potassium voltage-gated channel, shaker-related subfamily, member 6                   | CCDS8534.1  | chr12_4919931-4919931_G_T     | 242E>X  | Substitution | Nonsense             | 13% |
| MM18T | KCNB2   | potassium voltage-gated channel, Shab-related subfamily, member 2                     | CCDS6209.1  | chr8_73848848-73848848_T_C    | 420F>L  | Substitution | Nonsynonymous coding | 11% |
| MM18T | KCNC1   | potassium voltage-gated channel, Shaw-related subfamily, member 1                     | CCDS44547.1 | chr11_17757743-17757743_C_T   | 65A>V   | Substitution | Nonsynonymous coding | 18% |
| MM18T | KCNC2   | potassium voltage-gated channel, Shaw-related subfamily, member 2                     | CCDS9007.1  | chr12_75444848-75444848_T_G   | 313N>H  | Substitution | Nonsynonymous coding | 18% |
| MM18T | KCND1   | potassium voltage-gated channel, Shal-related subfamily, member 1                     | CCDS14314.1 | chrX_48826543-48826543_C_T    | 46V>M   | Substitution | Nonsynonymous coding | 17% |
| MM18T | KCNF1   | potassium voltage-gated channel, subfamily F, member 1                                | CCDS1676.1  | chr2_11053037-11053037_G_A    | 162R>H  | Substitution | Nonsynonymous coding | 19% |
| MM18T | KCNF1   | potassium voltage-gated channel, subfamily F, member 1                                | CCDS1676.1  | chr2_11053828-11053828_G_A    | 426E>K  | Substitution | Nonsynonymous coding | 10% |

|       |        |                                                                                  |                 |                               |        |              |                      |     |
|-------|--------|----------------------------------------------------------------------------------|-----------------|-------------------------------|--------|--------------|----------------------|-----|
| MM18T | KCNG1  | potassium voltage-gated channel, subfamily G, member 1                           | CCDS13436.1     | chr20_49621078-49621078_G_A   | 347A>V | Substitution | Nonsynonymous coding | 11% |
| MM18T | KCNG2  | potassium voltage-gated channel, subfamily G, member 2                           | CCDS12019.1     | chr18_77623998-77623998_G_A   | 111D>N | Substitution | Nonsynonymous coding | 13% |
| MM18T | KCNG2  | potassium voltage-gated channel, subfamily G, member 2                           | CCDS12019.1     | chr18_77659290-77659290_C_T   | 292A>V | Substitution | Nonsynonymous coding | 26% |
| MM18T | KCNG4  | potassium voltage-gated channel, subfamily G, member 4                           | CCDS10945.1     | chr16_84256361-84256361_G_A   | 341A>V | Substitution | Nonsynonymous coding | 20% |
| MM18T | KCNH2  | potassium voltage-gated channel, subfamily H (eag-related), member 2             | CCDS5910.1      | chr7_150649632-150649632_C_T  | 480E>K | Substitution | Nonsynonymous coding | 18% |
| MM18T | KCNH6  | potassium voltage-gated channel, subfamily H (eag-related), member 6             | CCDS11638.1     | chr17_61601559-61601559_G_A   | 46D>N  | Substitution | Nonsynonymous coding | 16% |
| MM18T | KCNIP1 | Kv channel interacting protein 1                                                 | CCDS34286.1     | chr5_169931625-169931625_C_T  | 17R>X  | Substitution | Nonsense             | 13% |
| MM18T | KCNIP3 | Kv channel interacting protein 3, calsenuin                                      | CCDS2013.1      | chr2_96048156-96048156_A_G    | 196D>G | Substitution | Nonsynonymous coding | 12% |
| MM18T | KCNJ1  | potassium inwardly-rectifying channel, subfamily J, member 1                     | CCDS8476.1      | chr11_128709874-128709874_C_A | 108D>Y | Substitution | Nonsynonymous coding | 13% |
| MM18T | KCNJ11 | potassium inwardly-rectifying channel, subfamily J, member 11                    | CCDS31436.1     | chr11_17408659-17408659_G_T   | 327S>Y | Substitution | Nonsynonymous coding | 16% |
| MM18T | KCNJ12 | potassium inwardly-rectifying channel, subfamily J, member 12                    | CCDS11219.1     | chr17_21319402-21319402_G_A   | 250D>N | Substitution | Nonsynonymous coding | 10% |
| MM18T | KCNJ14 | potassium inwardly-rectifying channel, subfamily J, member 14                    | CCDS12721.1     | chr19_48967774-48967774_C_T   | 351R>C | Substitution | Nonsynonymous coding | 18% |
| MM18T | KCNJ16 | potassium inwardly-rectifying channel, subfamily J, member 16                    | CCDS11687.1     | chr17_68129345-68129345_T_C   | 373S>P | Substitution | Nonsynonymous coding | 19% |
| MM18T | KCNJ3  | potassium inwardly-rectifying channel, subfamily J, member 3                     | CCDS2200.1      | chr2_15555942-15555942_C_T    | 219R>C | Substitution | Nonsynonymous coding | 16% |
| MM18T | KCNJ5  | potassium inwardly-rectifying channel, subfamily J, member 5                     | CCDS8479.1      | chr11_128782019-128782019_G_A | 284S>N | Substitution | Nonsynonymous coding | 10% |
| MM18T | KCNK2  | potassium channel, subfamily K, member 2                                         | CCDS41467.1     | chr1_215342608-215342608_G_A  | 181G>E | Substitution | Nonsynonymous coding | 14% |
| MM18T | KCNK4  | potassium channel, subfamily K, member 4                                         | CCDS8067.1      | chr11_64064612-64064612_G_A   | 112R>H | Substitution | Nonsynonymous coding | 13% |
| MM18T | KCNK5  | potassium channel, subfamily K, member 5                                         | CCDS4841.1      | chr6_39159259-39159259_C_T    | 303D>N | Substitution | Nonsynonymous coding | 16% |
| MM18T | KCNK6  | potassium channel, subfamily K, member 6                                         | CCDS12513.1     | chr19_38817954-38817954_G_A   | 285D>N | Substitution | Nonsynonymous coding | 19% |
| MM18T | KCNMA1 | potassium large conductance calcium-activated channel, subfamily M, alpha member | ENST00000428546 | chr10_78772259-78772259_T_G   | 175S>R | Substitution | Nonsynonymous coding | 12% |
| MM18T | KCNQ1  | potassium voltage-gated channel, KQT-like subfamily, member 1                    | CCDS7736.1      | chr11_2797206-2797206_A_G     | 536Y>C | Substitution | Nonsynonymous coding | 26% |
| MM18T | KCNQ3  | potassium voltage-gated channel, KQT-like subfamily, member 3                    | CCDS34943.1     | chr8_133141641-133141641_C_A  | 829E>D | Substitution | Nonsynonymous coding | 13% |
| MM18T | KCNQ3  | potassium voltage-gated channel, KQT-like subfamily, member 3                    | CCDS34943.1     | chr8_133141725-133141725_C_A  | 801E>D | Substitution | Nonsynonymous coding | 16% |
| MM18T | KCNQ3  | potassium voltage-gated channel, KQT-like subfamily, member 3                    | CCDS34943.1     | chr8_133150247-133150247_G_A  | 529L>F | Substitution | Nonsynonymous coding | 13% |
| MM18T | KCNQ3  | potassium voltage-gated channel, KQT-like subfamily, member 3                    | CCDS34943.1     | chr8_133152366-133152366_C_T  | 509E>K | Substitution | Nonsynonymous coding | 13% |
| MM18T | KCNQ4  | potassium voltage-gated channel, KQT-like subfamily, member 4                    | CCDS456.1       | chr1_41303356-41303356_C_T    | 589R>W | Substitution | Nonsynonymous coding | 11% |
| MM18T | KCNQ5  | potassium voltage-gated channel, KQT-like subfamily, member 5                    | NM_001160133    | chr6_73839522-73839522_C_A    | 418F>L | Substitution | Nonsynonymous coding | 14% |
| MM18T | KCNQ5  | potassium voltage-gated channel, KQT-like subfamily, member 5                    | CCDS4976.1      | chr6_73843172-73843172_C_T    | 426R>C | Substitution | Nonsynonymous coding | 16% |
| MM18T | KCNQ5  | potassium voltage-gated channel, KQT-like subfamily, member 5                    | CCDS4976.1      | chr6_73843341-73843341_C_A    | 482S>Y | Substitution | Nonsynonymous coding | 12% |
| MM18T | KCNT2  | potassium channel, subfamily T, member 2                                         | CCDS1384.1      | chr1_196397256-196397256_G_T  | 321F>L | Substitution | Nonsynonymous coding | 13% |
| MM18T | KCNV2  | potassium channel, subfamily V, member 2                                         | CCDS6447.1      | chr9_2718448-2718448_C_T      | 237R>C | Substitution | Nonsynonymous coding | 16% |
| MM18T | KCNV2  | potassium channel, subfamily V, member 2                                         | CCDS6447.1      | chr9_2718869-2718869_G_A      | 377R>H | Substitution | Nonsynonymous coding | 27% |

|       |           |                                                        |                 |                               |         |              |                      |     |
|-------|-----------|--------------------------------------------------------|-----------------|-------------------------------|---------|--------------|----------------------|-----|
| MM18T | KCP       | kielin/chordin-like protein                            | ENST00000441244 | chr7_128532846-128532846_C_G  | 416A>P  | Substitution | Nonsynonymous coding | 22% |
| MM18T | KCP       | kielin/chordin-like protein                            | ENST00000441244 | chr7_128533493-128533493_C_A  | 320E>D  | Substitution | Nonsynonymous coding | 10% |
| MM18T | KCTD15    | potassium channel tetramerisation domain containing 15 | CCDS46039.1     | chr19_34297856-34297856_C_T   | 111R>C  | Substitution | Nonsynonymous coding | 13% |
| MM18T | KCTD21    | potassium channel tetramerisation domain containing 21 | CCDS31645.1     | chr11_77885299-77885299_A_G   | 101V>A  | Substitution | Nonsynonymous coding | 16% |
| MM18T | KCTD4     | potassium channel tetramerisation domain containing 4  | CCDS9396.1      | chr13_45768619-45768619_C_A   | 28K>N   | Substitution | Nonsynonymous coding | 12% |
| MM18T | KCTD5     | potassium channel tetramerisation domain containing 5  | CCDS10475.1     | chr16_2747952-2747952_A_C     | 136K>T  | Substitution | Nonsynonymous coding | 14% |
| MM18T | KDELC2    | KDEL (Lys-Asp-Glu-Leu) containing 2                    | ENST00000434945 | chr11_108361909-108361909_A_C | 7F>C    | Substitution | Nonsynonymous coding | 13% |
| MM18T | KDM1B     | lysine (K)-specific demethylase 1B                     | CCDS34343.1     | chr6_18213994-18213994_C_A    | 465F>L  | Substitution | Nonsynonymous coding | 11% |
| MM18T | KDM1B     | lysine (K)-specific demethylase 1B                     | CCDS34343.1     | chr6_18197348-18197348_C_T    | 212R>X  | Substitution | Nonsense             | 11% |
| MM18T | KDM2A     | lysine (K)-specific demethylase 2A                     | CCDS44657.1     | chr11_67017779-67017779_C_T   | 760R>W  | Substitution | Nonsynonymous coding | 11% |
| MM18T | KDM4A     | lysine (K)-specific demethylase 4A                     | CCDS491.1       | chr1_44169974-44169974_G_A    | 1043R>Q | Substitution | Nonsynonymous coding | 13% |
| MM18T | KDM5A     | lysine (K)-specific demethylase 5A                     | CCDS41736.1     | chr12_402186-402186_C_A       | 1535K>N | Substitution | Nonsynonymous coding | 13% |
| MM18T | KDM5A     | lysine (K)-specific demethylase 5A                     | CCDS41736.1     | chr12_461416-461416_C_A       | 368E>D  | Substitution | Nonsynonymous coding | 13% |
| MM18T | KDM6B     | lysine (K)-specific demethylase 6B                     | CCDS32552.1     | chr17_7751741-7751741_A_C     | 712Q>P  | Substitution | Nonsynonymous coding | 11% |
| MM18T | KEAP1     | kelch-like ECH-associated protein 1                    | CCDS12239.1     | chr19_10602872-10602872_C_T   | 236D>N  | Substitution | Nonsynonymous coding | 15% |
| MM18T | KEL       | Kell blood group, metallo-endopeptidase                | CCDS34766.1     | chr7_142649650-142649650_C_A  | 383E>D  | Substitution | Nonsynonymous coding | 14% |
| MM18T | KEL       | Kell blood group, metallo-endopeptidase                | CCDS34766.1     | chr7_142650891-142650891_G_A  | ISV+4>  | Substitution | Splice site donor    | 12% |
| MM18T | KIAA0020  | KIAA0020                                               | CCDS6448.2      | chr9_2829806-2829806_C_A      | 274E>X  | Substitution | Nonsense             | 15% |
| MM18T | KIAA0100  | KIAA0100                                               | CCDS32595.1     | chr17_26943181-26943181_C_T   | 2108R>Q | Substitution | Nonsynonymous coding | 16% |
| MM18T | KIAA0101  | KIAA0101                                               | CCDS10193.1     | chr15_64669009-64669009_C_A   | 75D>Y   | Substitution | Nonsynonymous coding | 19% |
| MM18T | KIAA0141  | KIAA0141                                               | CCDS4268.1      | chr5_141318190-141318190_G_C  | 472A>P  | Substitution | Nonsynonymous coding | 13% |
| MM18T | KIAA0146  | KIAA0146                                               | CCDS43737.1     | chr8_48308999-48308999_G_T    | 197V>F  | Substitution | Nonsynonymous coding | 13% |
| MM18T | KIAA0195  | KIAA0195                                               | CCDS32732.1     | chr17_73491388-73491388_C_T   | 918L>F  | Substitution | Nonsynonymous coding | 12% |
| MM18T | KIAA0226  | KIAA0226                                               | CCDS43195.1     | chr3_197420642-197420642_G_A  | 577S>L  | Substitution | Nonsynonymous coding | 10% |
| MM18T | KIAA0226L | KIAA0226-like                                          | CCDS31970.2     | chr13_46942900-46942900_C_A   | 196E>X  | Substitution | Nonsense             | 13% |
| MM18T | KIAA0317  | KIAA0317                                               | CCDS41971.1     | chr14_75136702-75136702_C_T   | 579R>H  | Substitution | Nonsynonymous coding | 14% |
| MM18T | KIAA0317  | KIAA0317                                               | CCDS41971.1     | chr14_75151243-75151243_T_G   | 53N>H   | Substitution | Nonsynonymous coding | 14% |
| MM18T | KIAA0317  | KIAA0317                                               | CCDS41971.1     | chr14_75151317-75151317_C_T   | 28R>H   | Substitution | Nonsynonymous coding | 13% |
| MM18T | KIAA0319  | KIAA0319                                               | CCDS34348.1     | chr6_24596240-24596240_G_A    | 221S>L  | Substitution | Nonsynonymous coding | 15% |
| MM18T | KIAA0408  | KIAA0408                                               | CCDS34531.1     | chr6_127767563-127767563_T_G  | 634K>T  | Substitution | Nonsynonymous coding | 12% |
| MM18T | KIAA0408  | KIAA0408                                               | CCDS34531.1     | chr6_127768215-127768215_C_A  | 417E>X  | Substitution | Nonsense             | 13% |
| MM18T | KIAA0430  | KIAA0430                                               | CCDS10562.2     | chr16_15698200-15698200_C_T   | 1413R>Q | Substitution | Nonsynonymous coding | 14% |

|       |           |               |             |                               |         |              |                      |     |
|-------|-----------|---------------|-------------|-------------------------------|---------|--------------|----------------------|-----|
| MM18T | KIAA0513  | KIAA0513      | CCDS32499.1 | chr16_85111084-85111084_G_A   | 210D>N  | Substitution | Nonsynonymous coding | 14% |
| MM18T | KIAA0556  | KIAA0556      | CCDS32415.1 | chr16_27689267-27689267_C_A   | 253S>Y  | Substitution | Nonsynonymous coding | 20% |
| MM18T | KIAA0556  | KIAA0556      | CCDS32415.1 | chr16_27788316-27788316_C_T   | 1506A>V | Substitution | Nonsynonymous coding | 10% |
| MM18T | KIAA0586  | KIAA0586      | CCDS45115.1 | chr14_58910703-58910703_C_A   | 206S>Y  | Substitution | Nonsynonymous coding | 11% |
| MM18T | KIAA0907  | KIAA0907      | CCDS30885.1 | chr1_155896610-155896610_C_A  | 180E>X  | Substitution | Nonsense             | 13% |
| MM18T | KIAA0947  | KIAA0947      | CCDS47187.1 | chr5_5464777-5464777_G_A      | 1777R>Q | Substitution | Nonsynonymous coding | 15% |
| MM18T | KIAA0947  | KIAA0947      | CCDS47187.1 | chr5_5466585-5466585_C_T      | 2011R>C | Substitution | Nonsynonymous coding | 11% |
| MM18T | KIAA0947  | KIAA0947      | CCDS47187.1 | chr5_5463060-5463060_G_T      | 1205E>X | Substitution | Nonsense             | 11% |
| MM18T | KIAA1009  | KIAA1009      | CCDS34494.2 | chr6_84910582-84910582_G_T    | 254L>I  | Substitution | Nonsynonymous coding | 12% |
| MM18T | KIAA1107  | KIAA1107      | CCDS44172.1 | chr1_92646148-92646148_T_G    | 532F>V  | Substitution | Nonsynonymous coding | 15% |
| MM18T | KIAA1107  | KIAA1107      | CCDS44172.1 | chr1_92646734-92646734_A_C    | 727K>T  | Substitution | Nonsynonymous coding | 16% |
| MM18T | KIAA1109  | KIAA1109      | CCDS43267.1 | chr4_123184671-123184671_T_C  | 2353W>R | Substitution | Nonsynonymous coding | 13% |
| MM18T | KIAA1109  | KIAA1109      | CCDS43267.1 | chr4_123202785-123202785_C_T  | 2965P>S | Substitution | Nonsynonymous coding | 10% |
| MM18T | KIAA1109  | KIAA1109      | CCDS43267.1 | chr4_123249344-123249344_C_A  | 3694S>Y | Substitution | Nonsynonymous coding | 14% |
| MM18T | KIAA1199  | KIAA1199      | CCDS10315.1 | chr15_81221382-81221382_G_A   | 827D>N  | Substitution | Nonsynonymous coding | 10% |
| MM18T | KIAA1210  | KIAA1210      | CCDS48156.1 | chrX_118250484-118250484_G_A  | 209R>W  | Substitution | Nonsynonymous coding | 20% |
| MM18T | KIAA1211L | KIAA1211-like | CCDS42720.1 | chr2_99438425-99438425_A_C    | 771F>V  | Substitution | Nonsynonymous coding | 11% |
| MM18T | KIAA1217  | KIAA1217      | CCDS31165.1 | chr10_24762682-24762682_T_C   | 458Y>H  | Substitution | Nonsynonymous coding | 11% |
| MM18T | KIAA1217  | KIAA1217      | CCDS31165.1 | chr10_24820761-24820761_G_T   | 1029D>Y | Substitution | Nonsynonymous coding | 16% |
| MM18T | KIAA1217  | KIAA1217      | CCDS31165.1 | chr10_24831856-24831856_A_C   | 1219E>D | Substitution | Nonsynonymous coding | 10% |
| MM18T | KIAA1217  | KIAA1217      | CCDS31165.1 | chr10_24833228-24833228_G_A   | 1677E>K | Substitution | Nonsynonymous coding | 16% |
| MM18T | KIAA1239  | KIAA1239      | CCDS47040.1 | chr4_37447006-37447006_G_T    | 1132K>N | Substitution | Nonsynonymous coding | 17% |
| MM18T | KIAA1244  | KIAA1244      | CCDS5189.2  | chr6_138584688-138584688_C_A  | 690L>I  | Substitution | Nonsynonymous coding | 13% |
| MM18T | KIAA1324  | KIAA1324      | CCDS794.1   | chr1_109656826-109656826_C_A  | 7S>R    | Substitution | Nonsynonymous coding | 12% |
| MM18T | KIAA1324  | KIAA1324      | CCDS794.1   | chr1_109731770-109731770_A_C  | 434E>D  | Substitution | Nonsynonymous coding | 11% |
| MM18T | KIAA1324L | KIAA1324-like | CCDS47632.1 | chr7_86569410-86569410_T_G    | 255N>H  | Substitution | Nonsynonymous coding | 13% |
| MM18T | KIAA1324L | KIAA1324-like | CCDS47632.1 | chr7_86571380-86571380_T_C    | 232D>G  | Substitution | Nonsynonymous coding | 13% |
| MM18T | KIAA1377  | KIAA1377      | CCDS31658.1 | chr11_101834436-101834436_T_G | 890N>K  | Substitution | Nonsynonymous coding | 11% |
| MM18T | KIAA1377  | KIAA1377      | CCDS31658.1 | chr11_101834501-101834501_C_A | 912P>H  | Substitution | Nonsynonymous coding | 13% |
| MM18T | KIAA1383  | KIAA1383      | CCDS44334.1 | chr1_232941608-232941608_C_T  | 280S>L  | Substitution | Nonsynonymous coding | 15% |
| MM18T | KIAA1462  | KIAA1462      | CCDS41500.1 | chr10_30318389-30318389_G_A   | 230R>C  | Substitution | Nonsynonymous coding | 11% |
| MM18T | KIAA1467  | KIAA1467      | CCDS31750.1 | chr12_13221275-13221275_G_T   | 394D>Y  | Substitution | Nonsynonymous coding | 17% |

|       |          |                           |             |                               |         |              |                      |     |
|-------|----------|---------------------------|-------------|-------------------------------|---------|--------------|----------------------|-----|
| MM18T | KIAA1598 | KIAA1598                  | CCDS44482.1 | chr10_118661414-118661414_G_T | 512S>Y  | Substitution | Nonsynonymous coding | 11% |
| MM18T | KIAA1614 | KIAA1614                  | CCDS41442.1 | chr1_180910388-180910388_G_T  | 1042Q>H | Substitution | Nonsynonymous coding | 19% |
| MM18T | KIAA1614 | KIAA1614                  | CCDS41442.1 | chr1_180905347-180905347_G_T  | 768E>X  | Substitution | Nonsense             | 11% |
| MM18T | KIAA1731 | KIAA1731                  | CCDS44708.1 | chr11_93430659-93430659_C_A   | 861L>I  | Substitution | Nonsynonymous coding | 13% |
| MM18T | KIAA1841 | KIAA1841                  | CCDS46296.1 | chr2_61345225-61345225_C_T    | 668R>X  | Substitution | Nonsense             | 12% |
| MM18T | KIAA2018 | KIAA2018                  | CCDS43133.1 | chr3_113377963-113377963_C_T  | 856A>T  | Substitution | Nonsynonymous coding | 13% |
| MM18T | KIAA2022 | KIAA2022                  | CCDS35337.1 | chrX_73961049-73961049_C_T    | 1115D>N | Substitution | Nonsynonymous coding | 11% |
| MM18T | KIF11    | kinesin family member 11  | CCDS7422.1  | chr10_94369204-94369204_A_C   | 212Q>H  | Substitution | Nonsynonymous coding | 16% |
| MM18T | KIF15    | kinesin family member 15  | CCDS33744.1 | chr3_44835782-44835782_C_T    | 238A>V  | Substitution | Nonsynonymous coding | 13% |
| MM18T | KIF16B   | kinesin family member 16B | CCDS13122.1 | chr20_16360492-16360492_C_T   | 719E>K  | Substitution | Nonsynonymous coding | 11% |
| MM18T | KIF17    | kinesin family member 17  | CCDS213.1   | chr1_20998488-20998488_C_A    | 889D>Y  | Substitution | Nonsynonymous coding | 14% |
| MM18T | KIF19    | kinesin family member 19  | CCDS32718.2 | chr17_72347033-72347033_C_T   | 526R>C  | Substitution | Nonsynonymous coding | 17% |
| MM18T | KIF1A    | kinesin family member 1A  | CCDS46561.1 | chr2_241712543-241712543_C_T  | 390D>N  | Substitution | Nonsynonymous coding | 13% |
| MM18T | KIF1A    | kinesin family member 1A  | CCDS46561.1 | chr2_241700644-241700644_A_G  | ISV+2>  | Substitution | Splice site donor    | 24% |
| MM18T | KIF1B    | kinesin family member 1B  | CCDS111.1   | chr1_10425479-10425479_C_T    | 1463R>C | Substitution | Nonsynonymous coding | 19% |
| MM18T | KIF20B   | kinesin family member 20B | CCDS7407.1  | chr10_91492690-91492690_A_C   | 768N>H  | Substitution | Nonsynonymous coding | 15% |
| MM18T | KIF20B   | kinesin family member 20B | CCDS7407.1  | chr10_91518489-91518489_G_T   | 1470E>D | Substitution | Nonsynonymous coding | 12% |
| MM18T | KIF21B   | kinesin family member 21B | CCDS30965.1 | chr1_200957478-200957478_G_T  | 1118F>L | Substitution | Nonsynonymous coding | 15% |
| MM18T | KIF23    | kinesin family member 23  | CCDS32278.1 | chr15_69730710-69730710_G_A   | 560R>Q  | Substitution | Nonsynonymous coding | 13% |
| MM18T | KIF25    | kinesin family member 25  | CCDS5305.1  | chr6_168443258-168443258_G_C  | 283G>R  | Substitution | Nonsynonymous coding | 18% |
| MM18T | KIF26A   | kinesin family member 26A | CCDS45171.1 | chr14_104633287-104633287_G_A | 339D>N  | Substitution | Nonsynonymous coding | 10% |
| MM18T | KIF26B   | kinesin family member 26B | CCDS44342.1 | chr1_245765937-245765937_C_A  | 470S>Y  | Substitution | Nonsynonymous coding | 16% |
| MM18T | KIF2B    | kinesin family member 2B  | CCDS32685.1 | chr17_51900977-51900977_C_T   | 195R>C  | Substitution | Nonsynonymous coding | 14% |
| MM18T | KIF2B    | kinesin family member 2B  | CCDS32685.1 | chr17_51901046-51901046_G_A   | 218V>M  | Substitution | Nonsynonymous coding | 14% |
| MM18T | KIF2B    | kinesin family member 2B  | CCDS32685.1 | chr17_51901205-51901205_G_A   | 271D>N  | Substitution | Nonsynonymous coding | 13% |
| MM18T | KIF3B    | kinesin family member 3B  | CCDS13200.1 | chr20_30898349-30898349_G_T   | 257A>S  | Substitution | Nonsynonymous coding | 13% |
| MM18T | KIF4A    | kinesin family member 4A  | CCDS14401.1 | chrX_69615839-69615839_C_T    | 810S>L  | Substitution | Nonsynonymous coding | 14% |
| MM18T | KIF4A    | kinesin family member 4A  | CCDS14401.1 | chrX_69640046-69640046_G_T    | 1210K>N | Substitution | Nonsynonymous coding | 12% |
| MM18T | KIF4B    | kinesin family member 4B  | CCDS47324.1 | chr5_154395218-154395218_A_C  | 600K>T  | Substitution | Nonsynonymous coding | 11% |
| MM18T | KIF5A    | kinesin family member 5A  | CCDS8945.1  | chr12_57963447-57963447_G_T   | 366E>D  | Substitution | Nonsynonymous coding | 23% |
| MM18T | KIF7     | kinesin family member 7   | CCDS32325.2 | chr15_90192275-90192275_C_T   | 285V>I  | Substitution | Nonsynonymous coding | 18% |
| MM18T | KIF9     | kinesin family member 9   | CCDS2752.1  | chr3_47307327-47307327_T_G    | 270K>T  | Substitution | Nonsynonymous coding | 15% |

|       |         |                                                            |                 |                               |        |              |                      |     |
|-------|---------|------------------------------------------------------------|-----------------|-------------------------------|--------|--------------|----------------------|-----|
| MM18T | KIFC2   | kinesin family member C2                                   | CCDS6427.1      | chr8_145698287-145698287_G_T  | 657Q>H | Substitution | Nonsynonymous coding | 17% |
| MM18T | KIN     | KIN, antigenic determinant of recA protein homolog (mouse) | CCDS7080.1      | chr10_7829874-7829874_G_T     | 8T>N   | Substitution | Nonsynonymous coding | 17% |
| MM18T | KIRREL2 | kin of IRRE like 2 (Drosophila)                            | CCDS12481.1     | chr19_36353424-36353424_G_A   | 514G>R | Substitution | Nonsynonymous coding | 17% |
| MM18T | KL      | klotho                                                     | CCDS9347.1      | chr13_33635561-33635561_A_G   | 782N>S | Substitution | Nonsynonymous coding | 13% |
| MM18T | KL      | klotho                                                     | CCDS9347.1      | chr13_33638015-33638015_G_A   | 911G>R | Substitution | Nonsynonymous coding | 13% |
| MM18T | KLC1    | kinesin light chain 1                                      | CCDS45168.1     | chr14_104139462-104139462_G_A | 367E>K | Substitution | Nonsynonymous coding | 11% |
| MM18T | KLC2    | kinesin light chain 2                                      | CCDS8130.1      | chr11_66030431-66030431_G_A   | 226E>K | Substitution | Nonsynonymous coding | 17% |
| MM18T | KLC4    | kinesin light chain 4                                      | CCDS4882.1      | chr6_43039334-43039334_G_T    | 447E>X | Substitution | Nonsense             | 11% |
| MM18T | KLF11   | Kruppel-like factor 11                                     | CCDS1668.1      | chr2_10186325-10186325_G_T    | 31D>Y  | Substitution | Nonsynonymous coding | 13% |
| MM18T | KLF2    | Kruppel-like factor 2 (lung)                               | CCDS12343.1     | chr19_16437726-16437726_G_A   | 318E>K | Substitution | Nonsynonymous coding | 11% |
| MM18T | KLHL1   | kelch-like family member 1                                 | CCDS9445.1      | chr13_70549873-70549873_C_A   | 187E>X | Substitution | Nonsense             | 14% |
| MM18T | KLHL10  | kelch-like family member 10                                | ENST00000438813 | chr17_39998065-39998065__T    | NA     | Insertion    | Frameshift           | 11% |
| MM18T | KLHL15  | kelch-like family member 15                                | CCDS35217.1     | chrX_24006416-24006416_G_T    | 479C>X | Substitution | Nonsense             | 10% |
| MM18T | KLHL20  | kelch-like family member 20                                | CCDS1310.1      | chr1_173725136-173725136_G_T  | 309R>I | Substitution | Nonsynonymous coding | 10% |
| MM18T | KLHL22  | kelch-like family member 22                                | CCDS13779.1     | chr22_20779931-20779931_G_A   | 783R>C | Substitution | Nonsynonymous coding | 22% |
| MM18T | KLHL23  | kelch-like family member 23                                | CCDS2236.1      | chr2_170591558-170591558_C_A  | 12L>I  | Substitution | Nonsynonymous coding | 12% |
| MM18T | KLHL25  | kelch-like 25 (Drosophila)                                 | CCDS10339.1     | chr15_86312351-86312351_C_T   | 231E>K | Substitution | Nonsynonymous coding | 16% |
| MM18T | KLHL3   | kelch-like family member 3                                 | CCDS4192.1      | chr5_137071333-137071333_C_A  | 1M>I   | Substitution | Nonsynonymous coding | 13% |
| MM18T | KLHL31  | kelch-like 31 (Drosophila)                                 | CCDS34478.1     | chr6_53517124-53517124_C_T    | 393D>N | Substitution | Nonsynonymous coding | 23% |
| MM18T | KLHL31  | kelch-like 31 (Drosophila)                                 | CCDS34478.1     | chr6_53519148-53519148_C_T    | 308R>Q | Substitution | Nonsynonymous coding | 15% |
| MM18T | KLHL33  | kelch-like 33 (Drosophila)                                 | NM_001109997    | chr14_20898273-20898273_G_T   | 188L>M | Substitution | Nonsynonymous coding | 16% |
| MM18T | KLHL34  | kelch-like 34 (Drosophila)                                 | CCDS14199.1     | chrX_21674121-21674121_C_T    | 596D>N | Substitution | Nonsynonymous coding | 11% |
| MM18T | KLHL34  | kelch-like 34 (Drosophila)                                 | CCDS14199.1     | chrX_21674243-21674243_C_T    | 555R>Q | Substitution | Nonsynonymous coding | 10% |
| MM18T | KLHL34  | kelch-like 34 (Drosophila)                                 | CCDS14199.1     | chrX_21674301-21674301_C_T    | 536E>K | Substitution | Nonsynonymous coding | 16% |
| MM18T | KLHL34  | kelch-like 34 (Drosophila)                                 | CCDS14199.1     | chrX_21675591-21675591_C_T    | 106A>T | Substitution | Nonsynonymous coding | 19% |
| MM18T | KLHL36  | kelch-like 36 (Drosophila)                                 | CCDS10948.1     | chr16_84695626-84695626_G_A   | 580D>N | Substitution | Nonsynonymous coding | 20% |
| MM18T | KLHL36  | kelch-like 36 (Drosophila)                                 | CCDS10948.1     | chr16_84684539-84684539_C_A   | ISV+3> | Substitution | Splice site donor    | 13% |
| MM18T | KLHL38  | kelch-like 38 (Drosophila)                                 | CCDS43766.1     | chr8_124664585-124664585_T_G  | 194E>D | Substitution | Nonsynonymous coding | 14% |
| MM18T | KLHL4   | kelch-like family member 4                                 | CCDS14456.1     | chrX_86869444-86869444_C_A    | 200L>I | Substitution | Nonsynonymous coding | 12% |
| MM18T | KLHL41  | kelch-like 41 (Drosophila)                                 | CCDS2234.1      | chr2_170367043-170367043_T_G  | 252I>S | Substitution | Nonsynonymous coding | 19% |
| MM18T | KLHL5   | kelch-like family member 5                                 | CCDS33974.1     | chr4_39114659-39114659_C_T    | 616R>C | Substitution | Nonsynonymous coding | 17% |
| MM18T | CLK1    | kallikrein 1                                               | CCDS12804.1     | chr19_51322590-51322590_G_A   | 217P>S | Substitution | Nonsynonymous coding | 11% |

|       |        |                                                       |             |                              |        |              |                      |     |
|-------|--------|-------------------------------------------------------|-------------|------------------------------|--------|--------------|----------------------|-----|
| MM18T | KLK1   | kallikrein 1                                          | CCDS12804.1 | chr19_51325052-51325052_G_T  | 41A>D  | Substitution | Nonsynonymous coding | 10% |
| MM18T | KLK10  | kallikrein-related peptidase 10                       | CCDS12817.1 | chr19_51519273-51519273_C_T  | 137D>N | Substitution | Nonsynonymous coding | 15% |
| MM18T | KLK2   | kallikrein-related peptidase 2                        | CCDS12808.1 | chr19_51380002-51380002_G_A  | 161E>K | Substitution | Nonsynonymous coding | 16% |
| MM18T | KLK4   | kallikrein-related peptidase 4                        | CCDS12809.1 | chr19_51411840-51411840_G_A  | 157A>V | Substitution | Nonsynonymous coding | 17% |
| MM18T | KLK5   | kallikrein-related peptidase 5                        | CCDS12810.1 | chr19_51453249-51453249_C_T  | 66R>H  | Substitution | Nonsynonymous coding | 16% |
| MM18T | KLK7   | kallikrein-related peptidase 7                        | CCDS12812.1 | chr19_51483667-51483667_G_A  | 100R>C | Substitution | Nonsynonymous coding | 20% |
| MM18T | KLK8   | kallikrein-related peptidase 8                        | CCDS42600.1 | chr19_51499377-51499377_C_T  | 286V>I | Substitution | Nonsynonymous coding | 11% |
| MM18T | KLK8   | kallikrein-related peptidase 8                        | CCDS42600.1 | chr19_51503866-51503866_C_T  | 60R>Q  | Substitution | Nonsynonymous coding | 17% |
| MM18T | KLK9   | kallikrein-related peptidase 9                        | CCDS12816.1 | chr19_51512541-51512541_G_A  | 33S>F  | Substitution | Nonsynonymous coding | 20% |
| MM18T | KMO    | kynurenine 3-monooxygenase (kynurenine 3-hydroxylase) | CCDS1618.1  | chr1_241755337-241755337_G_A | 448R>Q | Substitution | Nonsynonymous coding | 13% |
| MM18T | KNG1   | kininogen 1                                           | CCDS43183.1 | chr3_186438003-186438003_C_T | 102A>V | Substitution | Nonsynonymous coding | 11% |
| MM18T | KNG1   | kininogen 1                                           | CCDS43183.1 | chr3_186459506-186459506_C_A | 441L>I | Substitution | Nonsynonymous coding | 14% |
| MM18T | KNSTRN | kinetochore-localized astrin/SPAG5 binding protein    | CCDS42021.1 | chr15_40675068-40675068_G_T  | 11R>I  | Substitution | Nonsynonymous coding | 15% |
| MM18T | KPNA4  | karyopherin alpha 4 (importin alpha 3)                | CCDS3191.1  | chr3_160231884-160231884_A_C | 373I>R | Substitution | Nonsynonymous coding | 19% |
| MM18T | KPNA5  | karyopherin alpha 5 (importin alpha 6)                | CCDS5111.1  | chr6_117026283-117026283_G_T | 206D>Y | Substitution | Nonsynonymous coding | 12% |
| MM18T | KPNA5  | karyopherin alpha 5 (importin alpha 6)                | CCDS5111.1  | chr6_117043438-117043438_G_T | 302L>F | Substitution | Nonsynonymous coding | 10% |
| MM18T | KPNB1  | karyopherin (importin) beta 1                         | CCDS11513.1 | chr17_45757410-45757410_G_T  | 793R>I | Substitution | Nonsynonymous coding | 11% |
| MM18T | KRBA2  | KRAB-A domain containing 2                            | CCDS11141.1 | chr17_8273462-8273462_G_A    | 157R>C | Substitution | Nonsynonymous coding | 13% |
| MM18T | KRIT1  | KRIT1, ankyrin repeat containing                      | CCDS5624.1  | chr7_91855116-91855116_G_T   | 391S>Y | Substitution | Nonsynonymous coding | 12% |
| MM18T | KRIT1  | KRIT1, ankyrin repeat containing                      | CCDS5624.1  | chr7_91852280-91852280_G_A   | 423R>X | Substitution | Nonsense             | 11% |
| MM18T | KRT10  | keratin 10                                            | CCDS11377.1 | chr17_38978833-38978833_G_T  | 2S>Y   | Substitution | Nonsynonymous coding | 12% |
| MM18T | KRT12  | keratin 12                                            | CCDS11378.1 | chr17_39019439-39019439_C_T  | 418V>I | Substitution | Nonsynonymous coding | 19% |
| MM18T | KRT13  | keratin 13                                            | CCDS11396.1 | chr17_39661415-39661415_C_T  | 130A>T | Substitution | Nonsynonymous coding | 17% |
| MM18T | KRT15  | keratin 15                                            | CCDS11398.1 | chr17_39672376-39672376_C_T  | 294E>K | Substitution | Nonsynonymous coding | 15% |
| MM18T | KRT15  | keratin 15                                            | CCDS11398.1 | chr17_39672409-39672409_C_T  | 283E>K | Substitution | Nonsynonymous coding | 16% |
| MM18T | KRT19  | keratin 19                                            | CCDS11399.1 | chr17_39680695-39680695_C_T  | 253R>Q | Substitution | Nonsynonymous coding | 14% |
| MM18T | KRT2   | keratin 2                                             | CCDS8835.1  | chr12_53041520-53041520_C_A  | 414K>N | Substitution | Nonsynonymous coding | 15% |
| MM18T | KRT2   | keratin 2                                             | CCDS8835.1  | chr12_53045797-53045797_T_C  | 44S>G  | Substitution | Nonsynonymous coding | 18% |
| MM18T | KRT20  | keratin 20                                            | CCDS11379.1 | chr17_39036435-39036435_C_T  | 237V>I | Substitution | Nonsynonymous coding | 13% |
| MM18T | KRT222 | keratin 222                                           | CCDS11371.1 | chr17_38812793-38812793_C_T  | 250R>Q | Substitution | Nonsynonymous coding | 11% |
| MM18T | KRT3   | keratin 3                                             | CCDS44895.1 | chr12_53189235-53189235_C_T  | 198E>K | Substitution | Nonsynonymous coding | 13% |
| MM18T | KRT3   | keratin 3                                             | CCDS44895.1 | chr12_53189250-53189250_G_C  | 193Q>E | Substitution | Nonsynonymous coding | 16% |

|       |           |                                 |             |                               |         |              |                      |     |
|-------|-----------|---------------------------------|-------------|-------------------------------|---------|--------------|----------------------|-----|
| MM18T | KRT40     | keratin 40                      | CCDS42320.1 | chr17_39140369-39140369_G_A   | 53R>C   | Substitution | Nonsynonymous coding | 12% |
| MM18T | KRT75     | keratin 75                      | CCDS8827.1  | chr12_52818308-52818308_G_A   | 550T>M  | Substitution | Nonsynonymous coding | 13% |
| MM18T | KRT75     | keratin 75                      | CCDS8827.1  | chr12_52825370-52825370_G_T   | 276S>Y  | Substitution | Nonsynonymous coding | 12% |
| MM18T | KRT76     | keratin 76                      | CCDS8838.1  | chr12_53162596-53162596_C_A   | 606Q>H  | Substitution | Nonsynonymous coding | 14% |
| MM18T | KRT76     | keratin 76                      | CCDS8838.1  | chr12_53165917-53165917_C_A   | 366Q>H  | Substitution | Nonsynonymous coding | 11% |
| MM18T | KRT82     | keratin 82                      | CCDS8826.1  | chr12_52797627-52797627_A_G   | 160C>R  | Substitution | Nonsynonymous coding | 14% |
| MM18T | KRT84     | keratin 84                      | CCDS8825.1  | chr12_52774282-52774282_A_C   | 430L>R  | Substitution | Nonsynonymous coding | 15% |
| MM18T | KRT86     | keratin 86                      | CCDS41785.1 | chr12_52695731-52695731_G_A   | 11A>T   | Substitution | Nonsynonymous coding | 14% |
| MM18T | KRTAP12-2 | keratin associated protein 12-2 | CCDS42965.1 | chr21_46086591-46086591_C_A   | 71K>N   | Substitution | Nonsynonymous coding | 12% |
| MM18T | KRTAP19-8 | keratin associated protein 19-8 | CCDS42917.1 | chr21_32410749-32410749_C_A   | 5R>I    | Substitution | Nonsynonymous coding | 13% |
| MM18T | KRTAP25-1 | keratin associated protein 25-1 | CCDS46640.1 | chr21_31661567-31661567_C_A   | 81S>I   | Substitution | Nonsynonymous coding | 13% |
| MM18T | KSR1      | kinase suppressor of ras 1      | NM_014238   | chr17_25937206-25937206_C_A   | 665A>D  | Substitution | Nonsynonymous coding | 11% |
| MM18T | KSR2      | kinase suppressor of ras 2      | NM_173598   | chr12_118298192-118298192_C_A | 46K>N   | Substitution | Nonsynonymous coding | 17% |
| MM18T | KSR2      | kinase suppressor of ras 2      | NM_173598   | chr12_117964917-117964917_C_A | 575G>X  | Substitution | Nonsense             | 12% |
| MM18T | KSR2      | kinase suppressor of ras 2      | NM_173598   | chr12_118405898-118405898_C_A | 26E>X   | Substitution | Nonsense             | 20% |
| MM18T | KTN1      | kinesin 1 (kinesin receptor)    | CCDS41957.1 | chr14_56079214-56079214_A_G   | 150K>E  | Substitution | Nonsynonymous coding | 14% |
| MM18T | L1CAM     | L1 cell adhesion molecule       | CCDS14733.1 | chrX_153130795-153130795_G_A  | 903S>L  | Substitution | Nonsynonymous coding | 11% |
| MM18T | L1CAM     | L1 cell adhesion molecule       | CCDS14733.1 | chrX_153135080-153135080_C_T  | 388A>T  | Substitution | Nonsynonymous coding | 16% |
| MM18T | L1CAM     | L1 cell adhesion molecule       | CCDS14733.1 | chrX_153137741-153137741_G_A  | 89S>L   | Substitution | Nonsynonymous coding | 15% |
| MM18T | L3MBTL4   | l(3)mbt-like 4 (Drosophila)     | CCDS11839.2 | chr18_6241400-6241400_T_C     | 170K>R  | Substitution | Nonsynonymous coding | 17% |
| MM18T | LACRT     | lacritin                        | CCDS8883.1  | chr12_55028612-55028612_G_T   | 5T>N    | Substitution | Nonsynonymous coding | 11% |
| MM18T | LAMA1     | laminin, alpha 1                | CCDS32787.1 | chr18_6956690-6956690_T_C     | 2680K>R | Substitution | Nonsynonymous coding | 20% |
| MM18T | LAMA1     | laminin, alpha 1                | CCDS32787.1 | chr18_6974932-6974932_T_C     | 2198D>G | Substitution | Nonsynonymous coding | 14% |
| MM18T | LAMA1     | laminin, alpha 1                | CCDS32787.1 | chr18_7023334-7023334_C_T     | 844E>K  | Substitution | Nonsynonymous coding | 14% |
| MM18T | LAMA2     | laminin, alpha 2                | CCDS5138.1  | chr6_129419493-129419493_A_G  | 191Y>C  | Substitution | Nonsynonymous coding | 17% |
| MM18T | LAMA2     | laminin, alpha 2                | CCDS5138.1  | chr6_129618885-129618885_C_T  | 971S>F  | Substitution | Nonsynonymous coding | 14% |
| MM18T | LAMA2     | laminin, alpha 2                | CCDS5138.1  | chr6_129766940-129766940_A_G  | 2135N>D | Substitution | Nonsynonymous coding | 13% |
| MM18T | LAMA2     | laminin, alpha 2                | CCDS5138.1  | chr6_129637000-129637000_C_T  | 1277R>X | Substitution | Nonsense             | 14% |
| MM18T | LAMA2     | laminin, alpha 2                | CCDS5138.1  | chr6_129775318-129775318_G_T  | 2198E>X | Substitution | Nonsense             | 18% |
| MM18T | LAMA3     | laminin, alpha 3                | CCDS42419.1 | chr18_21475001-21475001_G_T   | 1864E>D | Substitution | Nonsynonymous coding | 16% |
| MM18T | LAMA5     | laminin, alpha 5                | CCDS33502.1 | chr20_60886121-60886121_C_T   | 3373R>Q | Substitution | Nonsynonymous coding | 14% |
| MM18T | LAMA5     | laminin, alpha 5                | CCDS33502.1 | chr20_60898833-60898833_G_A   | 1950R>W | Substitution | Nonsynonymous coding | 15% |



|       |         |                                                           |             |                              |         |              |                      |     |
|-------|---------|-----------------------------------------------------------|-------------|------------------------------|---------|--------------|----------------------|-----|
| MM18T | LAMA5   | laminin, alpha 5                                          | CCDS33502.1 | chr20_60912983-60912983_C_T  | 635D>N  | Substitution | Nonsynonymous coding | 11% |
| MM18T | LAMB1   | laminin, beta 1                                           | CCDS5750.1  | chr7_107575988-107575988_C_A | 1354D>Y | Substitution | Nonsynonymous coding | 15% |
| MM18T | LAMB1   | laminin, beta 1                                           | CCDS5750.1  | chr7_107602054-107602054_C_T | 642R>Q  | Substitution | Nonsynonymous coding | 12% |
| MM18T | LAMB1   | laminin, beta 1                                           | CCDS5750.1  | chr7_107638831-107638831_C_T | 107R>H  | Substitution | Nonsynonymous coding | 16% |
| MM18T | LAMB2   | laminin, beta 2 (laminin 5)                               | CCDS2789.1  | chr3_49161644-49161644_C_A   | 1135D>Y | Substitution | Nonsynonymous coding | 14% |
| MM18T | LAMB3   | laminin, beta 3                                           | CCDS1487.1  | chr1_209796889-209796889_C_A | 773E>D  | Substitution | Nonsynonymous coding | 16% |
| MM18T | LAMC3   | laminin, gamma 3                                          | CCDS6938.1  | chr9_133911641-133911641_G_T | 300D>Y  | Substitution | Nonsynonymous coding | 22% |
| MM18T | LAMP5   | lysosomal-associated membrane protein family, member 5    | CCDS13106.1 | chr20_9495548-9495548_C_T    | 17L>F   | Substitution | Nonsynonymous coding | 17% |
| MM18T | LARP1B  | La ribonucleoprotein domain family, member 1B             | CCDS3738.1  | chr4_129043204-129043204_C_A | 462P>H  | Substitution | Nonsynonymous coding | 14% |
| MM18T | LBR     | lamin B receptor                                          | CCDS1545.1  | chr1_225605772-225605772_A_G | 251Y>H  | Substitution | Nonsynonymous coding | 14% |
| MM18T | LCA5    | Leber congenital amaurosis 5                              | CCDS4990.1  | chr6_80222980-80222980_C_A   | 223K>N  | Substitution | Nonsynonymous coding | 16% |
| MM18T | LCE6A   | late cornified envelope 6A                                | CCDS44227.1 | chr1_152816168-152816168_C_T | 58R>C   | Substitution | Nonsynonymous coding | 15% |
| MM18T | LCN12   | lipocalin 12                                              | CCDS7018.2  | chr9_139848372-139848372_G_A | 135R>H  | Substitution | Nonsynonymous coding | 31% |
| MM18T | LCN2    | lipocalin 2                                               | CCDS6892.1  | chr9_130913923-130913923_G_T | 94K>N   | Substitution | Nonsynonymous coding | 21% |
| MM18T | LCOR    | ligand dependent nuclear receptor corepressor             | CCDS7451.1  | chr10_98708924-98708924_C_A  | 37S>Y   | Substitution | Nonsynonymous coding | 14% |
| MM18T | LCP1    | lymphocyte cytosolic protein 1 (L-plastin)                | CCDS9403.1  | chr13_46727002-46727002_C_A  | 218E>X  | Substitution | Nonsense             | 12% |
| MM18T | LCT     | lactase                                                   | CCDS2178.1  | chr2_136555636-136555636_G_A | 1647R>C | Substitution | Nonsynonymous coding | 17% |
| MM18T | LCT     | lactase                                                   | CCDS2178.1  | chr2_136566338-136566338_C_A | 1193E>D | Substitution | Nonsynonymous coding | 14% |
| MM18T | LDB2    | LIM domain binding 2                                      | CCDS3420.1  | chr4_16504411-16504411_G_A   | 326T>M  | Substitution | Nonsynonymous coding | 17% |
| MM18T | LDB2    | LIM domain binding 2                                      | CCDS3420.1  | chr4_16760879-16760879_C_T   | 46S>N   | Substitution | Nonsynonymous coding | 12% |
| MM18T | LDB3    | LIM domain binding 3                                      | CCDS7377.1  | chr10_88485932-88485932_G_A  | 673D>N  | Substitution | Nonsynonymous coding | 12% |
| MM18T | LDLR    | low density lipoprotein receptor                          | CCDS12254.1 | chr19_11227594-11227594_G_A  | 589D>N  | Substitution | Nonsynonymous coding | 17% |
| MM18T | LDLRAP1 | low density lipoprotein receptor adaptor protein 1        | CCDS30639.1 | chr1_25891695-25891695_C_T   | 260S>L  | Substitution | Nonsynonymous coding | 10% |
| MM18T | LDOC1   | leucine zipper, down-regulated in cancer 1                | CCDS14672.1 | chrX_140270954-140270954_C_T | 85D>N   | Substitution | Nonsynonymous coding | 11% |
| MM18T | LDOC1L  | leucine zipper, down-regulated in cancer 1-like           | CCDS33662.1 | chr22_44893364-44893364_C_T  | 25V>I   | Substitution | Nonsynonymous coding | 19% |
| MM18T | LEAP2   | liver expressed antimicrobial peptide 2                   | CCDS4163.1  | chr5_132209750-132209750_G_T | 56D>Y   | Substitution | Nonsynonymous coding | 13% |
| MM18T | LEAP2   | liver expressed antimicrobial peptide 2                   | CCDS4163.1  | chr5_132209710-132209710_G_A | 42W>X   | Substitution | Nonsense             | 14% |
| MM18T | LECT2   | leukocyte cell-derived chemotaxin 2                       | CCDS4190.1  | chr5_135283072-135283072_G_A | 135S>L  | Substitution | Nonsynonymous coding | 12% |
| MM18T | LEF1    | lymphoid enhancer-binding factor 1                        | CCDS3679.1  | chr4_109086302-109086302_T_G | 77Q>H   | Substitution | Nonsynonymous coding | 17% |
| MM18T | LEMD1   | LEM domain containing 1                                   | CCDS30986.1 | chr1_205388469-205388469_T_G | 32K>Q   | Substitution | Nonsynonymous coding | 12% |
| MM18T | LETM1   | leucine zipper-EF-hand containing transmembrane protein 1 | CCDS3355.1  | chr4_1816296-1816296_A_C     | 692I>S  | Substitution | Nonsynonymous coding | 19% |
| MM18T | LETM2   | leucine zipper-EF-hand containing transmembrane protein 2 | CCDS6106.1  | chr8_38250337-38250337_A_T   | 62K>X   | Substitution | Nonsense             | 12% |

|       |           |                                                                                |                 |                               |        |              |                      |     |
|-------|-----------|--------------------------------------------------------------------------------|-----------------|-------------------------------|--------|--------------|----------------------|-----|
| MM18T | LGALS14   | lectin, galactoside-binding, soluble, 14                                       | CCDS12542.1     | chr19_40197863-40197863_G_T   | 75E>D  | Substitution | Nonsynonymous coding | 13% |
| MM18T | LGALS1    | lectin, galactoside-binding-like                                               | CCDS1877.1      | chr2_64683523-64683523_C_A    | 100S>Y | Substitution | Nonsynonymous coding | 19% |
| MM18T | LGI2      | leucine-rich repeat LGI family, member 2                                       | CCDS3431.1      | chr4_25005702-25005702_C_T    | 337E>K | Substitution | Nonsynonymous coding | 16% |
| MM18T | LGI3      | leucine-rich repeat LGI family, member 3                                       | CCDS6025.1      | chr8_22006237-22006237_C_A    | 361Q>H | Substitution | Nonsynonymous coding | 16% |
| MM18T | LGI4      | leucine-rich repeat LGI family, member 4                                       | CCDS12444.1     | chr19_35622709-35622709_C_A   | 148D>Y | Substitution | Nonsynonymous coding | 15% |
| MM18T | LGI4      | leucine-rich repeat LGI family, member 4                                       | CCDS12444.1     | chr19_35622891-35622891_G_A   | 124R>C | Substitution | Nonsynonymous coding | 17% |
| MM18T | LGR6      | leucine-rich repeat containing G protein-coupled receptor 6                    | CCDS30971.1     | chr1_202287097-202287097_G_T  | 556E>X | Substitution | Nonsense             | 12% |
| MM18T | LGSN      | lensin, lens protein with glutamine synthetase domain                          | CCDS4964.1      | chr6_63995532-63995532_C_T    | 97G>D  | Substitution | Nonsynonymous coding | 12% |
| MM18T | LHX5      | LIM homeobox 5                                                                 | CCDS9171.1      | chr12_113905991-113905991_T_C | 206T>A | Substitution | Nonsynonymous coding | 10% |
| MM18T | LIFR      | leukemia inhibitory factor receptor alpha                                      | CCDS3927.1      | chr5_38482055-38482055_G_A    | 979S>L | Substitution | Nonsynonymous coding | 15% |
| MM18T | LIG1      | ligase I, DNA, ATP-dependent                                                   | CCDS12711.1     | chr19_48620960-48620960_C_T   | 840A>T | Substitution | Nonsynonymous coding | 10% |
| MM18T | LIG3      | ligase III, DNA, ATP-dependent                                                 | CCDS11284.2     | chr17_33310405-33310405_C_A   | 127F>L | Substitution | Nonsynonymous coding | 12% |
| MM18T | LIG4      | ligase IV, DNA, ATP-dependent                                                  | CCDS9508.1      | chr13_108862740-108862740_G_A | 293R>X | Substitution | Nonsense             | 11% |
| MM18T | LILRA4    | leukocyte immunoglobulin-like receptor, subfamily A (with TM domain), member 4 | CCDS12890.1     | chr19_54849317-54849317_A_G   | 182M>T | Substitution | Nonsynonymous coding | 15% |
| MM18T | LILRA5    | leukocyte immunoglobulin-like receptor, subfamily A (with TM domain), member 5 | CCDS12888.1     | chr19_54822861-54822861_G_T   | 179H>N | Substitution | Nonsynonymous coding | 14% |
| MM18T | LIMA1     | LIM domain and actin binding 1                                                 | CCDS44877.1     | chr12_50625450-50625450_T_G   | 55S>R  | Substitution | Nonsynonymous coding | 11% |
| MM18T | LIME1     | Lck interacting transmembrane adaptor 1                                        | CCDS13536.1     | chr20_62369988-62369988_G_T   | 208R>M | Substitution | Nonsynonymous coding | 15% |
| MM18T | LIMK1     | LIM domain kinase 1                                                            | CCDS5563.1      | chr7_73520308-73520308_G_A    | 238E>K | Substitution | Nonsynonymous coding | 15% |
| MM18T | LIMS2     | LIM and senescent cell antigen-like domains 2                                  | ENST00000426981 | chr2_128399601-128399601_A_G  | 36W>R  | Substitution | Nonsynonymous coding | 16% |
| MM18T | LIMS2     | LIM and senescent cell antigen-like domains 2                                  | CCDS2147.1      | chr2_128399751-128399751_C_T  | 202R>H | Substitution | Nonsynonymous coding | 24% |
| MM18T | LIN52     | lin-52 homolog (C. elegans)                                                    | CCDS32120.1     | chr14_74567899-74567899_C_T   | 85R>X  | Substitution | Nonsense             | 11% |
| MM18T | LINC00482 | long intergenic non-protein coding RNA 482                                     | NM_178519       | chr17_79278636-79278636_C_A   | 177G>C | Substitution | Nonsynonymous coding | 17% |
| MM18T | LINGO1    | leucine rich repeat and Ig domain containing 1                                 | CCDS45313.1     | chr15_77907255-77907255_G_A   | 332R>C | Substitution | Nonsynonymous coding | 15% |
| MM18T | LINGO1    | leucine rich repeat and Ig domain containing 1                                 | CCDS45313.1     | chr15_77907381-77907381_G_A   | 290R>C | Substitution | Nonsynonymous coding | 15% |
| MM18T | LINGO4    | leucine rich repeat and Ig domain containing 4                                 | CCDS30855.1     | chr1_151775023-151775023_G_T  | 53A>D  | Substitution | Nonsynonymous coding | 12% |
| MM18T | LLGL1     | lethal giant larvae homolog 1 (Drosophila)                                     | CCDS32586.1     | chr17_18137392-18137392_G_A   | 206R>Q | Substitution | Nonsynonymous coding | 11% |
| MM18T | LLGL2     | lethal giant larvae homolog 2 (Drosophila)                                     | CCDS32733.1     | chr17_73568084-73568084_C_T   | 800S>L | Substitution | Nonsynonymous coding | 17% |
| MM18T | LMAN2L    | lectin, mannose-binding 2-like                                                 | CCDS46365.1     | chr2_97405703-97405703_C_A    | 25R>S  | Substitution | Nonsynonymous coding | 19% |
| MM18T | LMBR1     | limb region 1 homolog (mouse)                                                  | CCDS5945.1      | chr7_156480830-156480830_A_C  | 427N>K | Substitution | Nonsynonymous coding | 13% |
| MM18T | LMBR1L    | limb region 1 homolog (mouse)-like                                             | CCDS8780.2      | chr12_49494433-49494433_C_A   | ISV-4> | Substitution | Splice site acceptor | 15% |
| MM18T | LMBRD1    | LMBR1 domain containing 1                                                      | CCDS4969.1      | chr6_70462178-70462178_C_A    | 126K>N | Substitution | Nonsynonymous coding | 18% |
| MM18T | LMBRD2    | LMBR1 domain containing 2                                                      | CCDS34145.1     | chr5_36117918-36117918_G_T    | 407F>L | Substitution | Nonsynonymous coding | 19% |

|       |        |                                                                      |             |                              |         |              |                      |     |
|-------|--------|----------------------------------------------------------------------|-------------|------------------------------|---------|--------------|----------------------|-----|
| MM18T | LMNA   | lamin A/C                                                            | CCDS1131.1  | chr1_156107548-156107548_G_A | 571R>H  | Substitution | Nonsynonymous coding | 13% |
| MM18T | LMOD2  | leiomodin 2 (cardiac)                                                | CCDS47693.1 | chr7_123302280-123302280_A_G | 214T>A  | Substitution | Nonsynonymous coding | 16% |
| MM18T | LMOD3  | leiomodin 3 (fetal)                                                  | CCDS46862.1 | chr3_69168137-69168137_G_T   | 457P>T  | Substitution | Nonsynonymous coding | 12% |
| MM18T | LMTK2  | lemur tyrosine kinase 2                                              | CCDS5654.1  | chr7_97766750-97766750_T_G   | 76F>C   | Substitution | Nonsynonymous coding | 11% |
| MM18T | LMTK2  | lemur tyrosine kinase 2                                              | CCDS5654.1  | chr7_97822323-97822323_T_C   | 849V>A  | Substitution | Nonsynonymous coding | 16% |
| MM18T | LMTK2  | lemur tyrosine kinase 2                                              | CCDS5654.1  | chr7_97822385-97822385_C_A   | 870L>I  | Substitution | Nonsynonymous coding | 19% |
| MM18T | LMTK3  | lemur tyrosine kinase 3                                              | CCDS46136.1 | chr19_48994691-48994691_C_A  | 1429D>Y | Substitution | Nonsynonymous coding | 11% |
| MM18T | LMTK3  | lemur tyrosine kinase 3                                              | CCDS46136.1 | chr19_49002645-49002645_C_A  | 590D>Y  | Substitution | Nonsynonymous coding | 35% |
| MM18T | LNP1   | leukemia NUP98 fusion partner 1                                      | CCDS43120.1 | chr3_100170654-100170654_G_A | 83R>Q   | Substitution | Nonsynonymous coding | 12% |
| MM18T | LNPEP  | leucyl/cystinyl aminopeptidase                                       | CCDS4087.1  | chr5_96322341-96322341_G_T   | 366M>I  | Substitution | Nonsynonymous coding | 11% |
| MM18T | LONP2  | lon peptidase 2, peroxisomal                                         | CCDS10734.1 | chr16_48290643-48290643_G_T  | 197E>D  | Substitution | Nonsynonymous coding | 12% |
| MM18T | LONRF3 | LON peptidase N-terminal domain and ring finger 3                    | CCDS35374.1 | chrX_118124489-118124489_G_A | 461D>N  | Substitution | Nonsynonymous coding | 12% |
| MM18T | LONRF3 | LON peptidase N-terminal domain and ring finger 3                    | CCDS35374.1 | chrX_118108873-118108873_G_T | 44E>X   | Substitution | Nonsense             | 18% |
| MM18T | LOXHD1 | lipoxygenase homology domains 1                                      | NM_144612   | chr18_44159613-44159613_C_A  | 597D>Y  | Substitution | Nonsynonymous coding | 15% |
| MM18T | LOXHD1 | lipoxygenase homology domains 1                                      | NM_144612   | chr18_44173620-44173620_C_A  | 458E>D  | Substitution | Nonsynonymous coding | 11% |
| MM18T | LPAR2  | lysophosphatidic acid receptor 2                                     | CCDS12407.1 | chr19_19737741-19737741_G_A  | 118S>L  | Substitution | Nonsynonymous coding | 11% |
| MM18T | LPAR4  | lysophosphatidic acid receptor 4                                     | CCDS14441.1 | chrX_78010566-78010566_G_A   | 67R>H   | Substitution | Nonsynonymous coding | 11% |
| MM18T | LPIN1  | lipin 1                                                              | CCDS1682.1  | chr2_11913813-11913813_A_G   | 222I>V  | Substitution | Nonsynonymous coding | 16% |
| MM18T | LPIN2  | lipin 2                                                              | CCDS11829.1 | chr18_2951174-2951174_G_A    | 157R>X  | Substitution | Nonsense             | 10% |
| MM18T | LPL    | lipoprotein lipase                                                   | CCDS6012.1  | chr8_19805714-19805714_G_A   | 38E>K   | Substitution | Nonsynonymous coding | 13% |
| MM18T | LRCH4  | leucine-rich repeats and calponin homology (CH) domain containing 4  | CCDS34706.1 | chr7_100179776-100179776_G_A | 127S>L  | Substitution | Nonsynonymous coding | 12% |
| MM18T | LRCH4  | leucine-rich repeats and calponin homology (CH) domain containing 4  | CCDS34706.1 | chr7_100172730-100172730_C_A | 684*>Y  | Substitution | Nonsynonymous coding | 12% |
| MM18T | LRFN1  | leucine rich repeat and fibronectin type III domain containing 1     | CCDS46071.1 | chr19_39805183-39805183_C_T  | 265R>Q  | Substitution | Nonsynonymous coding | 15% |
| MM18T | LRFN2  | leucine rich repeat and fibronectin type III domain containing 2     | CCDS34443.1 | chr6_40360233-40360233_C_T   | 607E>K  | Substitution | Nonsynonymous coding | 13% |
| MM18T | LRFN2  | leucine rich repeat and fibronectin type III domain containing 2     | CCDS34443.1 | chr6_40400680-40400680_C_T   | 58R>H   | Substitution | Nonsynonymous coding | 12% |
| MM18T | LRIG3  | leucine-rich repeats and immunoglobulin-like domains 3               | CCDS8960.1  | chr12_59282241-59282241_T_C  | 273N>D  | Substitution | Nonsynonymous coding | 10% |
| MM18T | LRLT2  | leucine-rich repeat, immunoglobulin-like and transmembrane domains 2 | CCDS31234.1 | chr10_85981710-85981710_T_C  | 540D>G  | Substitution | Nonsynonymous coding | 16% |
| MM18T | LRMP   | lymphoid-restricted membrane protein                                 | CCDS8701.1  | chr12_25256784-25256784_G_A  | 316R>Q  | Substitution | Nonsynonymous coding | 13% |
| MM18T | LRMP   | lymphoid-restricted membrane protein                                 | CCDS8701.1  | chr12_25260969-25260969_G_A  | 492R>Q  | Substitution | Nonsynonymous coding | 14% |
| MM18T | LRP1B  | low density lipoprotein receptor-related protein 1B                  | CCDS2182.1  | chr2_141032064-141032064_C_A | 4357E>D | Substitution | Nonsynonymous coding | 11% |
| MM18T | LRP1B  | low density lipoprotein receptor-related protein 1B                  | CCDS2182.1  | chr2_141108530-141108530_C_T | 3910D>N | Substitution | Nonsynonymous coding | 13% |
| MM18T | LRP1B  | low density lipoprotein receptor-related protein 1B                  | CCDS2182.1  | chr2_141260666-141260666_C_T | 2843R>Q | Substitution | Nonsynonymous coding | 16% |

|       |         |                                                     |                 |                               |         |              |                      |     |
|-------|---------|-----------------------------------------------------|-----------------|-------------------------------|---------|--------------|----------------------|-----|
| MM18T | LRP1B   | low density lipoprotein receptor-related protein 1B | CCDS2182.1      | chr2_141267521-141267521_C_T  | 2792D>N | Substitution | Nonsynonymous coding | 15% |
| MM18T | LRP1B   | low density lipoprotein receptor-related protein 1B | CCDS2182.1      | chr2_142004886-142004886_C_A  | 167Q>H  | Substitution | Nonsynonymous coding | 12% |
| MM18T | LRP1B   | low density lipoprotein receptor-related protein 1B | CCDS2182.1      | chr2_141625334-141625334_G_T  | 1468Y>X | Substitution | Nonsense             | 11% |
| MM18T | LRP2    | low density lipoprotein receptor-related protein 2  | CCDS2232.1      | chr2_170025142-170025142_C_T  | 3848E>K | Substitution | Nonsynonymous coding | 11% |
| MM18T | LRP2    | low density lipoprotein receptor-related protein 2  | CCDS2232.1      | chr2_170101362-170101362_C_T  | 1091D>N | Substitution | Nonsynonymous coding | 16% |
| MM18T | LRP4    | low density lipoprotein receptor-related protein 4  | CCDS31478.1     | chr11_46895013-46895013_G_A   | 1454A>V | Substitution | Nonsynonymous coding | 13% |
| MM18T | LRP5    | low density lipoprotein receptor-related protein 5  | CCDS8181.1      | chr11_68154017-68154017_G_A   | 417D>N  | Substitution | Nonsynonymous coding | 12% |
| MM18T | LRP5    | low density lipoprotein receptor-related protein 5  | CCDS8181.1      | chr11_68183829-68183829_C_A   | 954S>Y  | Substitution | Nonsynonymous coding | 18% |
| MM18T | LRP6    | low density lipoprotein receptor-related protein 6  | CCDS8647.1      | chr12_12334073-12334073_C_T   | 426R>Q  | Substitution | Nonsynonymous coding | 14% |
| MM18T | LRR1    | leucine rich repeat protein 1                       | CCDS9686.1      | chr14_50069148-50069148_C_T   | 82R>W   | Substitution | Nonsynonymous coding | 14% |
| MM18T | LRRC16A | leucine rich repeat containing 16A                  | NM_017640       | chr6_25510979-25510979_G_T    | 541D>Y  | Substitution | Nonsynonymous coding | 12% |
| MM18T | LRRC16A | leucine rich repeat containing 16A                  | NM_017640       | chr6_25619762-25619762_A_C    | 1311K>T | Substitution | Nonsynonymous coding | 13% |
| MM18T | LRRC16B | leucine rich repeat containing 16B                  | CCDS32054.1     | chr14_24532369-24532369_T_G   | 916I>S  | Substitution | Nonsynonymous coding | 14% |
| MM18T | LRRC16B | leucine rich repeat containing 16B                  | CCDS32054.1     | chr14_24532648-24532648_C_A   | 962S>Y  | Substitution | Nonsynonymous coding | 20% |
| MM18T | LRRC27  | leucine rich repeat containing 27                   | CCDS31316.1     | chr10_134151116-134151116_C_A | 86F>L   | Substitution | Nonsynonymous coding | 21% |
| MM18T | LRRC27  | leucine rich repeat containing 27                   | CCDS31316.1     | chr10_134161560-134161560_C_T | 209A>V  | Substitution | Nonsynonymous coding | 17% |
| MM18T | LRRC33  | leucine rich repeat containing 33                   | CCDS3319.1      | chr3_196388270-196388270_C_A  | 586L>M  | Substitution | Nonsynonymous coding | 18% |
| MM18T | LRRC40  | leucine rich repeat containing 40                   | CCDS646.1       | chr1_70644581-70644581_T_G    | 253N>H  | Substitution | Nonsynonymous coding | 16% |
| MM18T | LRRC41  | leucine rich repeat containing 41                   | CCDS533.1       | chr1_46746920-46746920_G_A    | 545R>X  | Substitution | Nonsense             | 11% |
| MM18T | LRRC42  | leucine rich repeat containing 42                   | CCDS585.1       | chr1_54433352-54433352_C_T    | 343R>X  | Substitution | Nonsense             | 25% |
| MM18T | LRRC43  | leucine rich repeat containing 43                   | CCDS45001.1     | chr12_122676019-122676019_G_A | 332E>K  | Substitution | Nonsynonymous coding | 16% |
| MM18T | LRRC49  | leucine rich repeat containing 49                   | CCDS32282.1     | chr15_71197007-71197007_C_T   | 138S>L  | Substitution | Nonsynonymous coding | 16% |
| MM18T | LRRC4C  | leucine rich repeat containing 4C                   | CCDS31464.1     | chr11_40136465-40136465_C_A   | 460E>X  | Substitution | Nonsense             | 11% |
| MM18T | LRRC58  | leucine rich repeat containing 58                   | CCDS46892.1     | chr3_120053868-120053868_G_A  | 250R>C  | Substitution | Nonsynonymous coding | 14% |
| MM18T | LRRC66  | leucine rich repeat containing 66                   | CCDS43229.1     | chr4_52883338-52883338_G_A    | 148P>S  | Substitution | Nonsynonymous coding | 15% |
| MM18T | LRRC71  | leucine rich repeat containing 71                   | CCDS44249.1     | chr1_156890747-156890747_A_C  | 51K>T   | Substitution | Nonsynonymous coding | 11% |
| MM18T | LRRC72  | leucine rich repeat containing 72                   | ENST00000401542 | chr7_16620968-16620968_G_T    | 240E>X  | Substitution | Nonsense             | 16% |
| MM18T | LRRC73  | leucine rich repeat containing 73                   | CCDS34456.1     | chr6_43476513-43476513_C_A    | 140D>Y  | Substitution | Nonsynonymous coding | 15% |
| MM18T | LRRIQ1  | leucine-rich repeats and IQ motif containing 1      | CCDS41816.1     | chr12_85431974-85431974_A_C   | 7K>T    | Substitution | Nonsynonymous coding | 13% |
| MM18T | LRRIQ1  | leucine-rich repeats and IQ motif containing 1      | CCDS41816.1     | chr12_85450103-85450103_A_G   | 511E>G  | Substitution | Nonsynonymous coding | 14% |
| MM18T | LRRK1   | leucine-rich repeat kinase 1                        | CCDS42086.1     | chr15_101597072-101597072_C_A | 1448F>L | Substitution | Nonsynonymous coding | 15% |
| MM18T | LRRK1   | leucine-rich repeat kinase 1                        | CCDS42086.1     | chr15_101606886-101606886_C_A | 1937S>Y | Substitution | Nonsynonymous coding | 17% |

|       |         |                                                            |             |                              |         |              |                      |     |
|-------|---------|------------------------------------------------------------|-------------|------------------------------|---------|--------------|----------------------|-----|
| MM18T | LRRK2   | leucine-rich repeat kinase 2                               | CCDS31774.1 | chr12_40704344-40704344_C_T  | 1477R>X | Substitution | Nonsense             | 12% |
| MM18T | LRRN1   | leucine rich repeat neuronal 1                             | CCDS33685.1 | chr3_3887519-3887519_C_A     | 398F>L  | Substitution | Nonsynonymous coding | 12% |
| MM18T | LRRN3   | leucine rich repeat neuronal 3                             | CCDS5754.1  | chr7_110764536-110764536_C_T | 570R>X  | Substitution | Nonsense             | 12% |
| MM18T | LRRTM2  | leucine rich repeat transmembrane neuronal 2               | CCDS47272.1 | chr5_138208847-138208847_C_T | 468R>Q  | Substitution | Nonsynonymous coding | 11% |
| MM18T | LRRTM4  | leucine rich repeat transmembrane neuronal 4               | CCDS46346.1 | chr2_77746464-77746464__A    | NA      | Insertion    | Frameshift           | 11% |
| MM18T | LRRTM4  | leucine rich repeat transmembrane neuronal 4               | CCDS46346.1 | chr2_76975933-76975933_G_T   | 554S>Y  | Substitution | Nonsynonymous coding | 11% |
| MM18T | LSAMP   | limbic system-associated membrane protein                  | CCDS2982.1  | chr3_115805269-115805269_C_T | 97R>Q   | Substitution | Nonsynonymous coding | 16% |
| MM18T | LSG1    | large subunit GTPase 1 homolog (S. cerevisiae)             | CCDS33922.1 | chr3_194362829-194362829_T_G | 649S>R  | Substitution | Nonsynonymous coding | 13% |
| MM18T | LSP1    | lymphocyte-specific protein 1                              | CCDS31334.1 | chr11_1905229-1905229_C_T    | 189S>L  | Substitution | Nonsynonymous coding | 20% |
| MM18T | LSS     | lanosterol synthase (2,3-oxidosqualene-lanosterol cyclase) | CCDS13733.1 | chr21_47635614-47635614_G_T  | 293L>I  | Substitution | Nonsynonymous coding | 18% |
| MM18T | LTB     | lymphotoxin beta (TNF superfamily, member 3)               | CCDS4703.1  | chr6_31548906-31548906_C_A   | 105E>D  | Substitution | Nonsynonymous coding | 16% |
| MM18T | LTBP2   | latent transforming growth factor beta binding protein 2   | CCDS9831.1  | chr14_74973431-74973431_C_T  | 1335E>K | Substitution | Nonsynonymous coding | 16% |
| MM18T | LTBP3   | latent transforming growth factor beta binding protein 3   | CCDS44647.1 | chr11_65320454-65320454_C_A  | ISV-1>  | Substitution | Splice site acceptor | 14% |
| MM18T | LUC7L3  | LUC7-like 3 (S. cerevisiae)                                | CCDS11573.1 | chr17_48823998-48823998_G_A  | 358R>Q  | Substitution | Nonsynonymous coding | 14% |
| MM18T | LURAP1L | leucine rich adaptor protein 1-like                        | CCDS6473.1  | chr9_12775989-12775989_G_T   | 92R>M   | Substitution | Nonsynonymous coding | 18% |
| MM18T | LUZP1   | leucine zipper protein 1                                   | CCDS30628.1 | chr1_23415394-23415394_C_A   | 1075E>D | Substitution | Nonsynonymous coding | 19% |
| MM18T | LUZP2   | leucine zipper protein 2                                   | CCDS31446.1 | chr11_24998158-24998158_G_A  | 182E>K  | Substitution | Nonsynonymous coding | 17% |
| MM18T | LY6D    | lymphocyte antigen 6 complex, locus D                      | CCDS6390.1  | chr8_143867926-143867926_T_C | 3T>A    | Substitution | Nonsynonymous coding | 21% |
| MM18T | LY6G6C  | lymphocyte antigen 6 complex, locus G6C                    | CCDS4714.1  | chr6_31687009-31687009_C_T   | 81R>H   | Substitution | Nonsynonymous coding | 18% |
| MM18T | LY6G6C  | lymphocyte antigen 6 complex, locus G6C                    | CCDS4714.1  | chr6_31687971-31687971_C_T   | 21R>H   | Substitution | Nonsynonymous coding | 13% |
| MM18T | LY6G6D  | lymphocyte antigen 6 complex, locus G6D                    | CCDS34404.1 | chr6_31683135-31683135_G_T   | 1M>I    | Substitution | Nonsynonymous coding | 21% |
| MM18T | LY6H    | lymphocyte antigen 6 complex, locus H                      | CCDS47926.1 | chr8_144239845-144239845_C_T | 103R>Q  | Substitution | Nonsynonymous coding | 15% |
| MM18T | LY75    | lymphocyte antigen 75                                      | CCDS33308.1 | chr2_160637495-160637495_T_G | 65S>R   | Substitution | Nonsynonymous coding | 15% |
| MM18T | LY9     | lymphocyte antigen 9                                       | CCDS30916.1 | chr1_160786528-160786528_C_A | 406S>Y  | Substitution | Nonsynonymous coding | 14% |
| MM18T | LY9     | lymphocyte antigen 9                                       | CCDS30916.1 | chr1_160794035-160794035_C_A | 632P>H  | Substitution | Nonsynonymous coding | 12% |
| MM18T | LYPLAL1 | lysophospholipase-like 1                                   | CCDS1522.1  | chr1_219384943-219384943_C_A | 196S>Y  | Substitution | Nonsynonymous coding | 11% |
| MM18T | LYRM1   | LYR motif containing 1                                     | CCDS10593.1 | chr16_20935371-20935371_G_A  | 101R>Q  | Substitution | Nonsynonymous coding | 11% |
| MM18T | LYRM9   | LYR motif containing 9                                     | CCDS45631.1 | chr17_26209690-26209690_G_A  | 11R>W   | Substitution | Nonsynonymous coding | 14% |
| MM18T | LZTR1   | leucine-zipper-like transcription regulator 1              | CCDS33606.1 | chr22_21342344-21342344_A_C  | 149K>T  | Substitution | Nonsynonymous coding | 13% |
| MM18T | LZTR1   | leucine-zipper-like transcription regulator 1              | CCDS33606.1 | chr22_21350343-21350343_G_A  | 721E>K  | Substitution | Nonsynonymous coding | 23% |
| MM18T | MAB21L2 | mab-21-like 2 (C. elegans)                                 | CCDS3774.1  | chr4_151504797-151504797_G_A | 206E>K  | Substitution | Nonsynonymous coding | 21% |
| MM18T | MAB21L2 | mab-21-like 2 (C. elegans)                                 | CCDS3774.1  | chr4_151505062-151505062_C_T | 294S>L  | Substitution | Nonsynonymous coding | 24% |

|       |          |                                                                           |             |                              |         |              |                      |     |
|-------|----------|---------------------------------------------------------------------------|-------------|------------------------------|---------|--------------|----------------------|-----|
| MM18T | MACF1    | microtubule-actin crosslinking factor 1                                   | CCDS435.1   | chr1_39759276-39759276_G_T   | 718K>N  | Substitution | Nonsynonymous coding | 12% |
| MM18T | MACF1    | microtubule-actin crosslinking factor 1                                   | CCDS435.1   | chr1_39788286-39788286_G_A   | 1351E>K | Substitution | Nonsynonymous coding | 11% |
| MM18T | MACROD2  | MACRO domain containing 2                                                 | CCDS13120.2 | chr20_15210585-15210585_G_T  | ISV-1>  | Substitution | Splice site acceptor | 11% |
| MM18T | MACROD2  | MACRO domain containing 2                                                 | CCDS13120.2 | chr20_13982972-13982972_G_T  | 29E>X   | Substitution | Nonsense             | 12% |
| MM18T | MAFK     | v-maf musculoaponeurotic fibrosarcoma oncogene homolog K (avian)          | CCDS5325.1  | chr7_1579595-1579595_G_A     | 19E>K   | Substitution | Nonsynonymous coding | 16% |
| MM18T | MAGEA11  | melanoma antigen family A, 11                                             | CCDS48180.1 | chrX_148797849-148797849_C_T | 235R>C  | Substitution | Nonsynonymous coding | 18% |
| MM18T | MAGEA4   | melanoma antigen family A, 4                                              | CCDS14702.1 | chrX_151092504-151092504_G_A | 123R>H  | Substitution | Nonsynonymous coding | 16% |
| MM18T | MAGEA4   | melanoma antigen family A, 4                                              | CCDS14702.1 | chrX_151093040-151093040_T_C | 302Y>H  | Substitution | Nonsynonymous coding | 15% |
| MM18T | MAGEB10  | melanoma antigen family B, 10                                             | CCDS35221.1 | chrX_27840379-27840379_G_T   | 319R>I  | Substitution | Nonsynonymous coding | 11% |
| MM18T | MAGEB18  | melanoma antigen family B, 18                                             | CCDS14216.1 | chrX_26157740-26157740_G_A   | 213R>H  | Substitution | Nonsynonymous coding | 14% |
| MM18T | MAGEC2   | melanoma antigen family C, 2                                              | CCDS14678.1 | chrX_141290858-141290858_G_T | 306H>N  | Substitution | Nonsynonymous coding | 15% |
| MM18T | MAGEC3   | melanoma antigen family C, 3                                              | CCDS14676.1 | chrX_140985093-140985093_G_A | 517D>N  | Substitution | Nonsynonymous coding | 14% |
| MM18T | MAGED1   | melanoma antigen family D, 1                                              | CCDS35279.1 | chrX_51640079-51640079_G_A   | 499R>H  | Substitution | Nonsynonymous coding | 15% |
| MM18T | MAGED1   | melanoma antigen family D, 1                                              | CCDS35279.1 | chrX_51641714-51641714_C_A   | 663L>I  | Substitution | Nonsynonymous coding | 13% |
| MM18T | MAGEE2   | melanoma antigen family E, 2                                              | CCDS14431.1 | chrX_75004667-75004667_C_T   | 74E>K   | Substitution | Nonsynonymous coding | 11% |
| MM18T | MAGI1    | membrane associated guanylate kinase, WW and PDZ domain containing 1      | CCDS33780.1 | chr3_65416482-65416482_G_A   | 480R>C  | Substitution | Nonsynonymous coding | 14% |
| MM18T | MAMDC2   | MAM domain containing 2                                                   | CCDS6631.1  | chr9_72741329-72741329_G_T   | 300E>X  | Substitution | Nonsense             | 11% |
| MM18T | MAML2    | mastermind-like 2 (Drosophila)                                            | CCDS44714.1 | chr11_95825868-95825868_G_A  | 443R>C  | Substitution | Nonsynonymous coding | 13% |
| MM18T | MAMSTR   | MEF2 activating motif and SAP domain containing transcriptional regulator | CCDS46137.1 | chr19_49216702-49216702_G_T  | 357S>Y  | Substitution | Nonsynonymous coding | 11% |
| MM18T | MAN1A1   | mannosidase, alpha, class 1A, member 1                                    | CCDS5122.1  | chr6_119628161-119628161_A   | NA      | Insertion    | Splice site acceptor | 14% |
| MM18T | MAN1A2   | mannosidase, alpha, class 1A, member 2                                    | CCDS895.1   | chr1_117944875-117944875_G_T | 124E>X  | Substitution | Nonsense             | 12% |
| MM18T | MAN1B1   | mannosidase, alpha, class 1B, member 1                                    | CCDS7029.1  | chr9_139992319-139992319_G_T | 220E>D  | Substitution | Nonsynonymous coding | 24% |
| MM18T | MAN2A2   | mannosidase, alpha, class 2A, member 2                                    | CCDS32332.1 | chr15_91449719-91449719_G_T  | 276R>I  | Substitution | Nonsynonymous coding | 12% |
| MM18T | MANEAL   | mannosidase, endo-alpha-like                                              | CCDS44110.1 | chr1_38260126-38260126_C_T   | 91A>V   | Substitution | Nonsynonymous coding | 18% |
| MM18T | MAOB     | monoamine oxidase B                                                       | CCDS14261.1 | chrX_43662564-43662564_C_T   | 123D>N  | Substitution | Nonsynonymous coding | 15% |
| MM18T | MAP1A    | microtubule-associated protein 1A                                         | CCDS42031.1 | chr15_43816828-43816828_C_A  | 1053P>T | Substitution | Nonsynonymous coding | 13% |
| MM18T | MAP1A    | microtubule-associated protein 1A                                         | CCDS42031.1 | chr15_43817224-43817224_C_T  | 1185R>C | Substitution | Nonsynonymous coding | 12% |
| MM18T | MAP1A    | microtubule-associated protein 1A                                         | CCDS42031.1 | chr15_43817503-43817503_G_T  | 1278D>Y | Substitution | Nonsynonymous coding | 14% |
| MM18T | MAP1A    | microtubule-associated protein 1A                                         | CCDS42031.1 | chr15_43820845-43820845_G_A  | 2392A>T | Substitution | Nonsynonymous coding | 13% |
| MM18T | MAP1B    | microtubule-associated protein 1B                                         | CCDS4012.1  | chr5_71495360-71495360_G_A   | 2060E>K | Substitution | Nonsynonymous coding | 15% |
| MM18T | MAP1LC3B | microtubule-associated protein 1 light chain 3 beta                       | CCDS10960.1 | chr16_87432442-87432442_G_A  | 21R>Q   | Substitution | Nonsynonymous coding | 10% |
| MM18T | MAP2K4   | mitogen-activated protein kinase kinase 4                                 | CCDS11162.1 | chr17_11984783-11984783_G_A  | 110R>Q  | Substitution | Nonsynonymous coding | 12% |

|       |          |                                                                               |                 |                              |         |              |                      |     |
|-------|----------|-------------------------------------------------------------------------------|-----------------|------------------------------|---------|--------------|----------------------|-----|
| MM18T | MAP3K1   | mitogen-activated protein kinase kinase kinase 1, E3 ubiquitin protein ligase | CCDS43318.1     | chr5_56177930-56177930_A_G   | 968N>S  | Substitution | Nonsynonymous coding | 15% |
| MM18T | MAP3K10  | mitogen-activated protein kinase kinase kinase 10                             | CCDS12549.1     | chr19_40698213-40698213_A_G  | 92E>G   | Substitution | Nonsynonymous coding | 19% |
| MM18T | MAP3K13  | mitogen-activated protein kinase kinase kinase 13                             | CCDS3270.1      | chr3_185146772-185146772_T_G | 135F>V  | Substitution | Nonsynonymous coding | 15% |
| MM18T | MAP3K13  | mitogen-activated protein kinase kinase kinase 13                             | CCDS3270.1      | chr3_185169094-185169094_C_T | 397R>X  | Substitution | Nonsense             | 11% |
| MM18T | MAP3K14  | mitogen-activated protein kinase kinase kinase 14                             | ENST00000344686 | chr17_43344919-43344919_G_T  | 726S>Y  | Substitution | Nonsynonymous coding | 27% |
| MM18T | MAP3K15  | mitogen-activated protein kinase kinase kinase 15                             | ENST00000338883 | chrX_19533106-19533106_C_T   | 92E>K   | Substitution | Nonsynonymous coding | 12% |
| MM18T | MAP3K19  | mitogen-activated protein kinase kinase kinase 19                             | CCDS2176.2      | chr2_135744482-135744482_T_C | 654N>D  | Substitution | Nonsynonymous coding | 11% |
| MM18T | MAP3K19  | mitogen-activated protein kinase kinase kinase 19                             | CCDS2176.2      | chr2_135744844-135744844_G_A | 533S>F  | Substitution | Nonsynonymous coding | 13% |
| MM18T | MAP3K4   | mitogen-activated protein kinase kinase kinase 4                              | CCDS34565.1     | chr6_161522934-161522934_G_A | 1229V>I | Substitution | Nonsynonymous coding | 21% |
| MM18T | MAP3K6   | mitogen-activated protein kinase kinase kinase 6                              | CCDS299.1       | chr1_27690702-27690702_C_A   | 230D>Y  | Substitution | Nonsynonymous coding | 10% |
| MM18T | MAP3K7   | mitogen-activated protein kinase kinase kinase 7                              | CCDS5028.1      | chr6_91263200-91263200_C_T   | 238R>Q  | Substitution | Nonsynonymous coding | 14% |
| MM18T | MAP4     | microtubule-associated protein 4                                              | CCDS33750.1     | chr3_47912301-47912301_A_G   | ISV+2>  | Substitution | Splice site donor    | 15% |
| MM18T | MAP4K1   | mitogen-activated protein kinase kinase kinase kinase 1                       | CCDS42564.1     | chr19_39101728-39101728_C_A  | 258S>I  | Substitution | Nonsynonymous coding | 13% |
| MM18T | MAP4K3   | mitogen-activated protein kinase kinase kinase kinase 3                       | CCDS1803.1      | chr2_39487816-39487816_C_A   | 747D>Y  | Substitution | Nonsynonymous coding | 11% |
| MM18T | MAP4K3   | mitogen-activated protein kinase kinase kinase kinase 3                       | CCDS1803.1      | chr2_39552759-39552759_A_G   | 273V>A  | Substitution | Nonsynonymous coding | 14% |
| MM18T | MAP4K5   | mitogen-activated protein kinase kinase kinase kinase 5                       | NM_006575       | chr14_50904697-50904697_G_T  | 580L>I  | Substitution | Nonsynonymous coding | 10% |
| MM18T | MAP6     | microtubule-associated protein 6                                              | CCDS31641.1     | chr11_75316901-75316901_T_C  | 423D>G  | Substitution | Nonsynonymous coding | 16% |
| MM18T | MAP7D2   | MAP7 domain containing 2                                                      | CCDS14195.1     | chrX_20060693-20060693_A_C   | 271F>V  | Substitution | Nonsynonymous coding | 15% |
| MM18T | MAP7D2   | MAP7 domain containing 2                                                      | CCDS14195.1     | chrX_20060708-20060708_G_T   | 266L>I  | Substitution | Nonsynonymous coding | 14% |
| MM18T | MAPK13   | mitogen-activated protein kinase 13                                           | CCDS4818.1      | chr6_36106706-36106706_A_G   | 298T>A  | Substitution | Nonsynonymous coding | 17% |
| MM18T | MAPK14   | mitogen-activated protein kinase 14                                           | CCDS4815.1      | chr6_36043675-36043675_C_A   | 182Y>X  | Substitution | Nonsense             | 14% |
| MM18T | MAPK8IP1 | mitogen-activated protein kinase 8 interacting protein 1                      | CCDS7916.1      | chr11_45923579-45923579_C_T  | 191R>W  | Substitution | Nonsynonymous coding | 11% |
| MM18T | MAPK8IP2 | mitogen-activated protein kinase 8 interacting protein 2                      | ENST00000008876 | chr22_51048364-51048364_G_T  | 516E>X  | Substitution | Nonsense             | 13% |
| MM18T | MAPK8IP3 | mitogen-activated protein kinase 8 interacting protein 3                      | CCDS10442.2     | chr16_1818349-1818349_G_A    | 1237D>N | Substitution | Nonsynonymous coding | 14% |
| MM18T | MARK1    | MAP/microtubule affinity-regulating kinase 1                                  | CCDS31029.2     | chr1_220752829-220752829_T_C | 62L>S   | Substitution | Nonsynonymous coding | 14% |
| MM18T | MARK1    | MAP/microtubule affinity-regulating kinase 1                                  | CCDS31029.2     | chr1_220835222-220835222_G_A | 701R>Q  | Substitution | Nonsynonymous coding | 14% |
| MM18T | MARK4    | MAP/microtubule affinity-regulating kinase 4                                  | CCDS12658.1     | chr19_45768136-45768136_A_G  | 154K>E  | Substitution | Nonsynonymous coding | 21% |
| MM18T | MAST4    | microtubule associated serine/threonine kinase family member 4                | CCDS47225.1     | chr5_66459847-66459847_C_T   | 1425R>C | Substitution | Nonsynonymous coding | 20% |
| MM18T | MAST4    | microtubule associated serine/threonine kinase family member 4                | CCDS47225.1     | chr5_66460925-66460925_C_T   | 1784S>L | Substitution | Nonsynonymous coding | 16% |
| MM18T | MASTL    | microtubule associated serine/threonine kinase-like                           | CCDS7153.1      | chr10_27459302-27459302_G_A  | 472E>K  | Substitution | Nonsynonymous coding | 11% |
| MM18T | MAT2A    | methionine adenosyltransferase II, alpha                                      | CCDS1977.1      | chr2_85769709-85769709_C_T   | 264R>C  | Substitution | Nonsynonymous coding | 11% |
| MM18T | MATN1    | matrilin 1, cartilage matrix protein                                          | CCDS336.1       | chr1_31194554-31194554_C_T   | 47D>N   | Substitution | Nonsynonymous coding | 10% |

|       |        |                                                             |                 |                              |         |              |                      |     |
|-------|--------|-------------------------------------------------------------|-----------------|------------------------------|---------|--------------|----------------------|-----|
| MM18T | MATN4  | matrilin 4                                                  | CCDS13348.1     | chr20_43927139-43927139_C_T  | 366R>H  | Substitution | Nonsynonymous coding | 12% |
| MM18T | MATN4  | matrilin 4                                                  | CCDS13348.1     | chr20_43933087-43933087_C_T  | 142A>T  | Substitution | Nonsynonymous coding | 23% |
| MM18T | MATN4  | matrilin 4                                                  | CCDS13348.1     | chr20_43933126-43933126_C_T  | 129E>K  | Substitution | Nonsynonymous coding | 16% |
| MM18T | MATR3  | matrin 3                                                    | CCDS4210.1      | chr5_138643805-138643805_C_A | 234S>Y  | Substitution | Nonsynonymous coding | 13% |
| MM18T | MB21D2 | Mab-21 domain containing 2                                  | CCDS3302.2      | chr3_192517242-192517242_C_T | 137D>N  | Substitution | Nonsynonymous coding | 15% |
| MM18T | MBOAT1 | membrane bound O-acyltransferase domain containing 1        | CCDS43436.1     | chr6_20144496-20144496_C_T   | 125R>Q  | Substitution | Nonsynonymous coding | 13% |
| MM18T | M8TD1  | mbt domain containing 1                                     | CCDS11581.2     | chr17_49257992-49257992_G_A  | 611A>V  | Substitution | Nonsynonymous coding | 13% |
| MM18T | M8TD1  | mbt domain containing 1                                     | CCDS11581.2     | chr17_49272654-49272654_G_T  | 431F>L  | Substitution | Nonsynonymous coding | 12% |
| MM18T | MBTPS2 | membrane-bound transcription factor peptidase, site 2       | CCDS14201.1     | chrX_21896702-21896702_T_G   | 385F>V  | Substitution | Nonsynonymous coding | 18% |
| MM18T | MCAT   | malonyl CoA:ACP acyltransferase (mitochondrial)             | CCDS33660.1     | chr22_43539095-43539095_A_G  | 87V>A   | Substitution | Nonsynonymous coding | 15% |
| MM18T | MCC    | mutated in colorectal cancers                               | CCDS43351.1     | chr5_112437578-112437578_G_T | 419S>Y  | Substitution | Nonsynonymous coding | 12% |
| MM18T | MCF2L2 | MCF.2 cell line derived transforming sequence-like 2        | CCDS3243.1      | chr3_182925517-182925517_C_T | 864R>Q  | Substitution | Nonsynonymous coding | 11% |
| MM18T | MCM2   | minichromosome maintenance complex component 2              | CCDS3043.1      | chr3_127340509-127340509_C_T | 870R>C  | Substitution | Nonsynonymous coding | 25% |
| MM18T | MCM8   | minichromosome maintenance complex component 8              | CCDS13094.1     | chr20_5939262-5939262_C_T    | 227R>C  | Substitution | Nonsynonymous coding | 11% |
| MM18T | MCM9   | minichromosome maintenance complex component 9              | ENST00000316316 | chr6_119149101-119149101_C_T | 574R>Q  | Substitution | Nonsynonymous coding | 10% |
| MM18T | MCMDC2 | minichromosome maintenance domain containing 2              | CCDS6197.2      | chr8_67796123-67796123_A_G   | 323K>E  | Substitution | Nonsynonymous coding | 11% |
| MM18T | MCMDC2 | minichromosome maintenance domain containing 2              | CCDS6197.2      | chr8_67813523-67813523_G_A   | 570R>H  | Substitution | Nonsynonymous coding | 12% |
| MM18T | MCRS1  | microspherule protein 1                                     | CCDS31795.1     | chr12_49957222-49957222_G_A  | 235S>L  | Substitution | Nonsynonymous coding | 17% |
| MM18T | MCTP2  | multiple C2 domains, transmembrane 2                        | CCDS32338.1     | chr15_94841514-94841514_C_A  | 7S>Y    | Substitution | Nonsynonymous coding | 12% |
| MM18T | MCTP2  | multiple C2 domains, transmembrane 2                        | CCDS32338.1     | chr15_94945216-94945216_G_A  | 685E>K  | Substitution | Nonsynonymous coding | 13% |
| MM18T | MCU    | mitochondrial calcium uniporter                             | CCDS7317.1      | chr10_74644093-74644093_C_T  | 311R>C  | Substitution | Nonsynonymous coding | 24% |
| MM18T | MDGA1  | MAM domain containing glycosylphosphatidylinositol anchor 1 | CCDS47417.1     | chr6_37626117-37626117_C_T   | 96E>K   | Substitution | Nonsynonymous coding | 16% |
| MM18T | MDN1   | MDN1, midasin homolog (yeast)                               | CCDS5024.1      | chr6_90368632-90368632_C_A   | 4906E>D | Substitution | Nonsynonymous coding | 13% |
| MM18T | MDN1   | MDN1, midasin homolog (yeast)                               | CCDS5024.1      | chr6_90450007-90450007_T_G   | 1513K>N | Substitution | Nonsynonymous coding | 11% |
| MM18T | MDN1   | MDN1, midasin homolog (yeast)                               | CCDS5024.1      | chr6_90453323-90453323_C_T   | 1430R>Q | Substitution | Nonsynonymous coding | 15% |
| MM18T | MECR   | mitochondrial trans-2-enoyl-CoA reductase                   | CCDS30659.1     | chr1_29520656-29520656_G_T   | 334L>I  | Substitution | Nonsynonymous coding | 13% |
| MM18T | MED12  | mediator complex subunit 12                                 | CCDS43970.1     | chrX_70350053-70350053_C_T   | 1346R>C | Substitution | Nonsynonymous coding | 15% |
| MM18T | MED12  | mediator complex subunit 12                                 | CCDS43970.1     | chrX_70352765-70352765_C_T   | 1496R>C | Substitution | Nonsynonymous coding | 12% |
| MM18T | MED12  | mediator complex subunit 12                                 | CCDS43970.1     | chrX_70355027-70355027_C_T   | 1650T>M | Substitution | Nonsynonymous coding | 13% |
| MM18T | MED12L | mediator complex subunit 12-like                            | CCDS33876.1     | chr3_151087245-151087245_G_T | 1156R>I | Substitution | Nonsynonymous coding | 20% |
| MM18T | MED12L | mediator complex subunit 12-like                            | CCDS33876.1     | chr3_151129121-151129121_C_T | 1954S>L | Substitution | Nonsynonymous coding | 10% |
| MM18T | MED13  | mediator complex subunit 13                                 | CCDS42366.1     | chr17_60043932-60043932_C_A  | 1424K>N | Substitution | Nonsynonymous coding | 15% |



|       |         |                                                                                        |                 |                               |         |              |                      |     |
|-------|---------|----------------------------------------------------------------------------------------|-----------------|-------------------------------|---------|--------------|----------------------|-----|
| MM18T | MED13   | mediator complex subunit 13                                                            | CCDS42366.1     | chr17_60062392-60062392_C_A   | 815K>N  | Substitution | Nonsynonymous coding | 11% |
| MM18T | MED13L  | mediator complex subunit 13-like                                                       | CCDS9177.1      | chr12_116421138-116421138_G_T | 1580S>Y | Substitution | Nonsynonymous coding | 11% |
| MM18T | MED14   | mediator complex subunit 14                                                            | CCDS14254.1     | chrX_40539327-40539327_A_G    | 890M>T  | Substitution | Nonsynonymous coding | 14% |
| MM18T | MED15   | mediator complex subunit 15                                                            | CCDS33602.1     | chr22_20929493-20929493_C_A   | 416P>T  | Substitution | Nonsynonymous coding | 18% |
| MM18T | MED23   | mediator complex subunit 23                                                            | CCDS5147.1      | chr6_131915316-131915316_G_T  | 1052A>D | Substitution | Nonsynonymous coding | 14% |
| MM18T | MED23   | mediator complex subunit 23                                                            | CCDS5147.1      | chr6_131926510-131926510_G_T  | 495L>M  | Substitution | Nonsynonymous coding | 14% |
| MM18T | MED25   | mediator complex subunit 25                                                            | CCDS33075.1     | chr19_50333086-50333086_C_T   | 190A>V  | Substitution | Nonsynonymous coding | 11% |
| MM18T | MEGF10  | multiple EGF-like-domains 10                                                           | CCDS4142.1      | chr5_126746118-126746118_C_A  | 319L>I  | Substitution | Nonsynonymous coding | 14% |
| MM18T | MEGF10  | multiple EGF-like-domains 10                                                           | CCDS4142.1      | chr5_126776457-126776457_G_T  | 754D>Y  | Substitution | Nonsynonymous coding | 16% |
| MM18T | MEGF10  | multiple EGF-like-domains 10                                                           | CCDS4142.1      | chr5_126781327-126781327_G_C  | 890M>I  | Substitution | Nonsynonymous coding | 10% |
| MM18T | MEGF11  | multiple EGF-like-domains 11                                                           | CCDS10213.2     | chr15_66416293-66416293_C_A   | 48Q>H   | Substitution | Nonsynonymous coding | 12% |
| MM18T | MEGF6   | multiple EGF-like-domains 6                                                            | CCDS41237.1     | chr1_3428132-3428132_C_A      | 366D>Y  | Substitution | Nonsynonymous coding | 28% |
| MM18T | MEOX2   | mesenchyme homeobox 2                                                                  | CCDS34605.1     | chr7_15666368-15666368_T_C    | ISV+3>  | Substitution | Splice site donor    | 14% |
| MM18T | MEP1B   | meprin A, beta                                                                         | CCDS45846.1     | chr18_29793475-29793475_G_A   | 511R>H  | Substitution | Nonsynonymous coding | 13% |
| MM18T | MEPCE   | methylphosphate capping enzyme                                                         | CCDS5693.1      | chr7_100027705-100027705_G_T  | 22D>Y   | Substitution | Nonsynonymous coding | 14% |
| MM18T | METAP1  | methionyl aminopeptidase 1                                                             | CCDS47110.1     | chr4_99966347-99966347_C_T    | 225R>C  | Substitution | Nonsynonymous coding | 13% |
| MM18T | METTL24 | methyltransferase like 24                                                              | CCDS43489.1     | chr6_110567283-110567283_C_A  | 323E>X  | Substitution | Nonsense             | 12% |
| MM18T | METTL6  | methyltransferase like 6                                                               | ENST00000453819 | chr3_15455421-15455421_C_T    | 124E>K  | Substitution | Nonsynonymous coding | 14% |
| MM18T | METTL7B | methyltransferase like 7B                                                              | CCDS8887.2      | chr12_56075786-56075786_C_T   | 83A>V   | Substitution | Nonsynonymous coding | 12% |
| MM18T | MFN1    | mitofusin 1                                                                            | CCDS3228.1      | chr3_179096507-179096507_C_T  | 523P>S  | Substitution | Nonsynonymous coding | 13% |
| MM18T | MFN1    | mitofusin 1                                                                            | CCDS3228.1      | chr3_179069714-179069714_C_T  | 47R>X   | Substitution | Nonsense             | 12% |
| MM18T | MFN2    | mitofusin 2                                                                            | CCDS30587.1     | chr1_12067223-12067223_G_T    | 662K>N  | Substitution | Nonsynonymous coding | 21% |
| MM18T | MFSD10  | major facilitator superfamily domain containing 10                                     | CCDS3365.1      | chr4_2934196-2934196_G_T      | 192P>H  | Substitution | Nonsynonymous coding | 24% |
| MM18T | MFSD2B  | major facilitator superfamily domain containing 2B                                     | CCDS46228.1     | chr2_24246543-24246543_C_A    | 420F>L  | Substitution | Nonsynonymous coding | 14% |
| MM18T | MGAM    | maltase-glucoamylase (alpha-glucohydrolase)                                            | CCDS47727.1     | chr7_141734169-141734169_G_A  | 593A>T  | Substitution | Nonsynonymous coding | 13% |
| MM18T | MGAT3   | mannosyl (beta-1,4-)-glycoprotein beta-1,4-N-acetylglucosaminyltransferase             | CCDS13994.2     | chr22_39884217-39884217_G_A   | 289D>N  | Substitution | Nonsynonymous coding | 10% |
| MM18T | MGAT5   | mannosyl (alpha-1,6-)-glycoprotein beta-1,6-N-acetylglucosaminyltransferase            | CCDS2171.1      | chr2_135095926-135095926_G_A  | 248A>T  | Substitution | Nonsynonymous coding | 15% |
| MM18T | MGAT5B  | mannosyl (alpha-1,6-)-glycoprotein beta-1,6-N-acetylglucosaminyltransferase, isozyme B | CCDS45788.1     | chr17_74900367-74900367_T_A   | 196Y>N  | Substitution | Nonsynonymous coding | 11% |
| MM18T | MGAT5B  | mannosyl (alpha-1,6-)-glycoprotein beta-1,6-N-acetylglucosaminyltransferase, isozyme B | CCDS45788.1     | chr17_74902238-74902238_C_T   | 343R>W  | Substitution | Nonsynonymous coding | 16% |
| MM18T | MGEA5   | meningioma expressed antigen 5 (hyaluronidase)                                         | CCDS7520.1      | chr10_103547213-103547213_G_T | 841S>Y  | Substitution | Nonsynonymous coding | 10% |
| MM18T | MICAL2  | microtubule associated monooxygenase, calponin and LIM domain containing 2             | CCDS7809.1      | chr11_12234932-12234932_T_G   | 274F>L  | Substitution | Nonsynonymous coding | 15% |
| MM18T | MICAL3  | microtubule associated monooxygenase, calponin and LIM domain containing 3             | CCDS46659.1     | chr22_18300495-18300495_C_A   | 1644E>D | Substitution | Nonsynonymous coding | 20% |

|       |          |                                                                              |              |                               |         |              |                      |     |
|-------|----------|------------------------------------------------------------------------------|--------------|-------------------------------|---------|--------------|----------------------|-----|
| MM18T | MICAL3   | microtubule associated monooxygenase, calponin and LIM domain containing 3   | CCDS46659.1  | chr22_18301681-18301681_G_A   | 1249A>V | Substitution | Nonsynonymous coding | 17% |
| MM18T | MICAL1   | MICAL-like 1                                                                 | CCDS13961.1  | chr22_38317983-38317983_C_T   | 192R>W  | Substitution | Nonsynonymous coding | 17% |
| MM18T | MID1IP1  | MID1 interacting protein 1                                                   | CCDS14249.1  | chrX_38664237-38664237_C_T    | 13S>L   | Substitution | Nonsynonymous coding | 19% |
| MM18T | MID1IP1  | MID1 interacting protein 1                                                   | CCDS14249.1  | chrX_38664262-38664262_C_A    | 21F>L   | Substitution | Nonsynonymous coding | 11% |
| MM18T | MID2     | midline 2                                                                    | CCDS14532.2  | chrX_107084466-107084466_C_T  | 191R>X  | Substitution | Nonsense             | 12% |
| MM18T | MIOS     | missing oocyte, meiosis regulator, homolog (Drosophila)                      | CCDS43554.1  | chr7_7612234-7612234_T_C      | 43L>S   | Substitution | Nonsynonymous coding | 12% |
| MM18T | MIOS     | missing oocyte, meiosis regulator, homolog (Drosophila)                      | CCDS43554.1  | chr7_7622821-7622821_A_G      | 489E>G  | Substitution | Nonsynonymous coding | 11% |
| MM18T | MIR1200  | microRNA 1200                                                                | hsa-mir-1200 | chr7_36958993-36958993_C_A    | 15E>D   | Substitution | Nonsynonymous coding | 10% |
| MM18T | MIR1269A | microRNA 1269a                                                               | hsa-mir-1269 | chr4_67142544-67142544_G_T    | 1W>C    | Substitution | Nonsynonymous coding | 14% |
| MM18T | MIR1913  | microRNA 1913                                                                | hsa-mir-1913 | chr6_166922861-166922861_C_T  | 21A>T   | Substitution | Nonsynonymous coding | 11% |
| MM18T | MIR410   | microRNA 410                                                                 | hsa-mir-410  | chr14_101532297-101532297_G_A | 17E>K   | Substitution | Nonsynonymous coding | 15% |
| MM18T | MIR520E  | microRNA 520e                                                                | hsa-mir-520e | chr19_54178999-54178999_C_A   | 12S>Y   | Substitution | Nonsynonymous coding | 16% |
| MM18T | MIR557   | microRNA 557                                                                 | hsa-mir-557  | chr1_168344763-168344763_G_T  | 1R>I    | Substitution | Nonsynonymous coding | 13% |
| MM18T | MIR608   | microRNA 608                                                                 | hsa-mir-608  | chr10_102734794-102734794_C_A | 18S>Y   | Substitution | Nonsynonymous coding | 10% |
| MM18T | MIR628   | microRNA 628                                                                 | hsa-mir-628  | chr15_55665154-55665154_G_A   | 27R>X   | Substitution | Nonsense             | 17% |
| MM18T | MIR675   | microRNA 675                                                                 | hsa-mir-675  | chr11_2018043-2018043_C_A     | 7E>X    | Substitution | Nonsense             | 11% |
| MM18T | MITF     | microphthalmia-associated transcription factor                               | CCDS2913.1   | chr3_70000969-70000969__T     | NA      | Insertion    | Frameshift           | 10% |
| MM18T | MKI67    | antigen identified by monoclonal antibody Ki-67                              | CCDS7659.1   | chr10_129907612-129907612_C_A | 831R>I  | Substitution | Nonsynonymous coding | 18% |
| MM18T | MKI67    | antigen identified by monoclonal antibody Ki-67                              | CCDS7659.1   | chr10_129913424-129913424_T_G | 416E>D  | Substitution | Nonsynonymous coding | 11% |
| MM18T | MKL1     | megakaryoblastic leukemia (translocation) 1                                  | CCDS14003.1  | chr22_40816537-40816537_G_A   | 309R>C  | Substitution | Nonsynonymous coding | 20% |
| MM18T | MKLN1    | muskelin 1, intracellular mediator containing kelch motifs                   | CCDS34754.1  | chr7_131099422-131099422_G_A  | 267R>H  | Substitution | Nonsynonymous coding | 13% |
| MM18T | MKLN1    | muskelin 1, intracellular mediator containing kelch motifs                   | CCDS34754.1  | chr7_131172450-131172450_C_T  | 724P>L  | Substitution | Nonsynonymous coding | 15% |
| MM18T | MKRN2    | makorin ring finger protein 2                                                | CCDS33702.1  | chr3_12618209-12618209_G_A    | 313E>K  | Substitution | Nonsynonymous coding | 12% |
| MM18T | MKRN3    | makorin ring finger protein 3                                                | CCDS10013.1  | chr15_23812255-23812255_G_A   | 442W>X  | Substitution | Nonsense             | 16% |
| MM18T | MLF1     | myeloid leukemia factor 1                                                    | CCDS3182.1   | chr3_158320725-158320725_G_T  | 233R>I  | Substitution | Nonsynonymous coding | 15% |
| MM18T | MLL      | myeloid/lymphoid or mixed-lineage leukemia (trithorax homolog, Drosophila)   | CCDS31686.1  | chr11_118359439-118359439_C_A | 1481F>L | Substitution | Nonsynonymous coding | 14% |
| MM18T | MLL2     | myeloid/lymphoid or mixed-lineage leukemia 2                                 | CCDS44873.1  | chr12_49431491-49431491_C_A   | 3216E>D | Substitution | Nonsynonymous coding | 13% |
| MM18T | MLL2     | myeloid/lymphoid or mixed-lineage leukemia 2                                 | CCDS44873.1  | chr12_49431550-49431550_T_C   | 3197T>A | Substitution | Nonsynonymous coding | 18% |
| MM18T | MLL3     | myeloid/lymphoid or mixed-lineage leukemia 3                                 | CCDS5931.1   | chr7_151845399-151845399_A_G  | 4538I>T | Substitution | Nonsynonymous coding | 11% |
| MM18T | MLL3     | myeloid/lymphoid or mixed-lineage leukemia 3                                 | CCDS5931.1   | chr7_151860866-151860866_G_A  | 3266R>W | Substitution | Nonsynonymous coding | 19% |
| MM18T | MLL5     | myeloid/lymphoid or mixed-lineage leukemia 5 (trithorax homolog, Drosophila) | CCDS34723.1  | chr7_104747076-104747076_G_A  | 902D>N  | Substitution | Nonsynonymous coding | 14% |
| MM18T | MLL5     | myeloid/lymphoid or mixed-lineage leukemia 5 (trithorax homolog, Drosophila) | CCDS34723.1  | chr7_104748203-104748203_G_A  | 1100R>Q | Substitution | Nonsynonymous coding | 11% |

|       |         |                                                                                                                                                                                                                                                                |             |                              |         |              |                      |     |
|-------|---------|----------------------------------------------------------------------------------------------------------------------------------------------------------------------------------------------------------------------------------------------------------------|-------------|------------------------------|---------|--------------|----------------------|-----|
| MM18T | MLLT10  | myeloid/lymphoid or mixed-lineage leukemia (trithorax homolog, Drosophila); translocated myeloid/lymphoid or mixed-lineage leukemia (trithorax homolog, Drosophila); translocated methylmalonic aciduria (cobalamin deficiency) cblD type, with homocystinuria | CCDS7135.1  | chr10_22024076-22024076_G_A  | 972G>E  | Substitution | Nonsynonymous coding | 11% |
| MM18T | MLLT6   | myeloid/lymphoid or mixed-lineage leukemia (trithorax homolog, Drosophila); translocated methylmalonic aciduria (cobalamin deficiency) cblD type, with homocystinuria                                                                                          | CCDS11327.1 | chr17_36868947-36868947_C_T  | 242R>X  | Substitution | Nonsense             | 16% |
| MM18T | MMADHC  | matrix metalloproteinase 15 (membrane-inserted)                                                                                                                                                                                                                | CCDS2189.1  | chr2_150438698-150438698_T_C | 33T>A   | Substitution | Nonsynonymous coding | 11% |
| MM18T | MMP15   | matrix metalloproteinase 15 (membrane-inserted)                                                                                                                                                                                                                | CCDS10792.1 | chr16_58071434-58071434_G_A  | 74R>H   | Substitution | Nonsynonymous coding | 10% |
| MM18T | MMP19   | matrix metalloproteinase 19                                                                                                                                                                                                                                    | CCDS8895.1  | chr12_56233472-56233472_C_T  | 192E>K  | Substitution | Nonsynonymous coding | 14% |
| MM18T | MMP24   | matrix metalloproteinase 24 (membrane-inserted)                                                                                                                                                                                                                | CCDS46593.1 | chr20_33842291-33842291_C_T  | 184T>M  | Substitution | Nonsynonymous coding | 20% |
| MM18T | MMP25   | matrix metalloproteinase 25                                                                                                                                                                                                                                    | CCDS10492.1 | chr16_3100094-3100094_G_A    | 106R>H  | Substitution | Nonsynonymous coding | 18% |
| MM18T | MMP9    | matrix metalloproteinase 9 (gelatinase B, 92kDa gelatinase, 92kDa type IV collagenase)                                                                                                                                                                         | CCDS13390.1 | chr20_44639932-44639932_G_A  | 267R>Q  | Substitution | Nonsynonymous coding | 13% |
| MM18T | MMRN2   | multimerin 2                                                                                                                                                                                                                                                   | CCDS7379.1  | chr10_88702329-88702329_A_G  | 738F>L  | Substitution | Nonsynonymous coding | 18% |
| MM18T | MN1     | meningioma (disrupted in balanced translocation) 1                                                                                                                                                                                                             | CCDS42998.1 | chr22_28193699-28193699_G_A  | 945R>C  | Substitution | Nonsynonymous coding | 11% |
| MM18T | MN1     | meningioma (disrupted in balanced translocation) 1                                                                                                                                                                                                             | CCDS42998.1 | chr22_28193930-28193930_C_T  | 868A>T  | Substitution | Nonsynonymous coding | 12% |
| MM18T | MN1     | meningioma (disrupted in balanced translocation) 1                                                                                                                                                                                                             | CCDS42998.1 | chr22_28194041-28194041_C_T  | 831A>T  | Substitution | Nonsynonymous coding | 13% |
| MM18T | MNAT1   | menage a trois homolog 1, cyclin H assembly factor (Xenopus laevis)                                                                                                                                                                                            | CCDS9750.1  | chr14_61263071-61263071_A    | NA      | Insertion    | Frameshift           | 14% |
| MM18T | MNDA    | myeloid cell nuclear differentiation antigen                                                                                                                                                                                                                   | CCDS1177.1  | chr1_158813186-158813186_G_A | 128G>E  | Substitution | Nonsynonymous coding | 19% |
| MM18T | MNDA    | myeloid cell nuclear differentiation antigen                                                                                                                                                                                                                   | CCDS1177.1  | chr1_158815649-158815649_G_T | 281K>N  | Substitution | Nonsynonymous coding | 13% |
| MM18T | MNF1    | mitochondrial nucleoid factor 1                                                                                                                                                                                                                                | CCDS4784.1  | chr6_33665507-33665507_C_A   | 102E>X  | Substitution | Nonsense             | 12% |
| MM18T | MNT     | MNT, MAX dimerization protein                                                                                                                                                                                                                                  | CCDS11018.1 | chr17_2298647-2298647_G_A    | 59R>C   | Substitution | Nonsynonymous coding | 18% |
| MM18T | MOCOS   | molybdenum cofactor sulfurase                                                                                                                                                                                                                                  | CCDS11919.1 | chr18_33800151-33800151_G_A  | 644R>Q  | Substitution | Nonsynonymous coding | 14% |
| MM18T | MOCOS2  | molybdenum cofactor synthesis 2                                                                                                                                                                                                                                | CCDS3958.1  | chr5_52398025-52398025_G_T   | 43S>Y   | Substitution | Nonsynonymous coding | 14% |
| MM18T | MOG     | myelin oligodendrocyte glycoprotein                                                                                                                                                                                                                            | CCDS4667.1  | chr6_29627161-29627161_C_T   | 52P>S   | Substitution | Nonsynonymous coding | 16% |
| MM18T | MOGS    | mannosyl-oligosaccharide glucosidase                                                                                                                                                                                                                           | CCDS42700.1 | chr2_74692172-74692172_G_A   | 68A>V   | Substitution | Nonsynonymous coding | 21% |
| MM18T | MORC1   | MORC family CW-type zinc finger 1                                                                                                                                                                                                                              | CCDS2955.1  | chr3_108723734-108723734_C_A | 672R>I  | Substitution | Nonsynonymous coding | 12% |
| MM18T | MORC2   | MORC family CW-type zinc finger 2                                                                                                                                                                                                                              | CCDS33636.1 | chr22_31329464-31329464_C_A  | 728R>I  | Substitution | Nonsynonymous coding | 14% |
| MM18T | MORC4   | MORC family CW-type zinc finger 4                                                                                                                                                                                                                              | CCDS14525.2 | chrX_106185789-106185789_T_C | 778K>E  | Substitution | Nonsynonymous coding | 12% |
| MM18T | MORC4   | MORC family CW-type zinc finger 4                                                                                                                                                                                                                              | CCDS14525.2 | chrX_106185880-106185880_C_A | 747E>D  | Substitution | Nonsynonymous coding | 13% |
| MM18T | MORC4   | MORC family CW-type zinc finger 4                                                                                                                                                                                                                              | CCDS14525.2 | chrX_106224701-106224701_T_G | 227K>N  | Substitution | Nonsynonymous coding | 13% |
| MM18T | MORF4L2 | mortality factor 4 like 2                                                                                                                                                                                                                                      | CCDS14512.1 | chrX_102931453-102931453_G_A | 168S>L  | Substitution | Nonsynonymous coding | 17% |
| MM18T | MOSPD2  | motile sperm domain containing 2                                                                                                                                                                                                                               | CCDS14162.1 | chrX_14915351-14915351_A_G   | 156I>M  | Substitution | Nonsynonymous coding | 17% |
| MM18T | MOV10L1 | Mov10l1, Moloney leukemia virus 10-like 1, homolog (mouse)                                                                                                                                                                                                     | CCDS14084.1 | chr22_50581481-50581481_T_G  | 730I>S  | Substitution | Nonsynonymous coding | 18% |
| MM18T | MOXD1   | monooxygenase, DBH-like 1                                                                                                                                                                                                                                      | CCDS5152.2  | chr6_132694048-132694048_T_G | 167K>T  | Substitution | Nonsynonymous coding | 11% |
| MM18T | MPDZ    | multiple PDZ domain protein                                                                                                                                                                                                                                    | CCDS47951.1 | chr9_13150617-13150617_G_A   | 1175R>W | Substitution | Nonsynonymous coding | 12% |
| MM18T | MPDZ    | multiple PDZ domain protein                                                                                                                                                                                                                                    | CCDS47951.1 | chr9_13168384-13168384_G_T   | 1079L>I | Substitution | Nonsynonymous coding | 16% |

|       |         |                                                                  |                 |                               |         |              |                      |     |
|-------|---------|------------------------------------------------------------------|-----------------|-------------------------------|---------|--------------|----------------------|-----|
| MM18T | MPL     | myeloproliferative leukemia virus oncogene                       | CCDS483.1       | chr1_43804284-43804284_T_G    | 95F>C   | Substitution | Nonsynonymous coding | 13% |
| MM18T | MPLKIP  | M-phase specific PLK1 interacting protein                        | CCDS5463.1      | chr7_40173928-40173928_G_T    | 80S>Y   | Substitution | Nonsynonymous coding | 17% |
| MM18T | MPO     | myeloperoxidase                                                  | CCDS11604.1     | chr17_56357259-56357259_G_T   | 122A>D  | Substitution | Nonsynonymous coding | 14% |
| MM18T | MPP2    | membrane protein, palmitoylated 2 (MAGUK p55 subfamily member 2) | CCDS11471.1     | chr17_41955338-41955338_C_A   | 499R>I  | Substitution | Nonsynonymous coding | 21% |
| MM18T | MPP2    | membrane protein, palmitoylated 2 (MAGUK p55 subfamily member 2) | CCDS11471.1     | chr17_41957265-41957265_G_A   | 413A>V  | Substitution | Nonsynonymous coding | 15% |
| MM18T | MPP2    | membrane protein, palmitoylated 2 (MAGUK p55 subfamily member 2) | CCDS11471.1     | chr17_41958707-41958707_A_G   | 275V>A  | Substitution | Nonsynonymous coding | 16% |
| MM18T | MPP4    | membrane protein, palmitoylated 4 (MAGUK p55 subfamily member 4) | CCDS46491.1     | chr2_202510018-202510018_T_C  | 610Q>R  | Substitution | Nonsynonymous coding | 13% |
| MM18T | MPP5    | membrane protein, palmitoylated 5 (MAGUK p55 subfamily member 5) | CCDS9779.1      | chr14_67746065-67746065_C_T   | 60R>W   | Substitution | Nonsynonymous coding | 11% |
| MM18T | MPP5    | membrane protein, palmitoylated 5 (MAGUK p55 subfamily member 5) | CCDS9779.1      | chr14_67787921-67787921_C_A   | 562S>Y  | Substitution | Nonsynonymous coding | 11% |
| MM18T | MPP5    | membrane protein, palmitoylated 5 (MAGUK p55 subfamily member 5) | CCDS9779.1      | chr14_67790427-67790427_G_T   | 583K>N  | Substitution | Nonsynonymous coding | 13% |
| MM18T | MPP6    | membrane protein, palmitoylated 6 (MAGUK p55 subfamily member 6) | CCDS5388.1      | chr7_24708126-24708126_C_T    | 321R>C  | Substitution | Nonsynonymous coding | 15% |
| MM18T | MPRIP   | myosin phosphatase Rho interacting protein                       | CCDS42268.1     | chr17_17053482-17053482_G_T   | 434D>Y  | Substitution | Nonsynonymous coding | 11% |
| MM18T | MPRIP   | myosin phosphatase Rho interacting protein                       | CCDS42268.1     | chr17_17061748-17061748_C_T   | 493S>L  | Substitution | Nonsynonymous coding | 17% |
| MM18T | MRE11A  | MRE11 meiotic recombination 11 homolog A (S. cerevisiae)         | CCDS8299.1      | chr11_94179016-94179016_C_A   | 609K>N  | Substitution | Nonsynonymous coding | 14% |
| MM18T | MGRPRF  | MAS-related GPR, member F                                        | CCDS8188.1      | chr11_68773570-68773570_C_T   | 70G>S   | Substitution | Nonsynonymous coding | 23% |
| MM18T | MGRPRF  | MAS-related GPR, member F                                        | CCDS8188.1      | chr11_68773692-68773692_C_T   | 29S>N   | Substitution | Nonsynonymous coding | 23% |
| MM18T | MGRPRG  | MAS-related GPR, member G                                        | CCDS44520.1     | chr11_3239611-3239611_C_T     | 145G>S  | Substitution | Nonsynonymous coding | 19% |
| MM18T | MROH1   | maestro heat-like repeat family member 1                         | CCDS47938.1     | chr8_145246740-145246740_G_T  | 279E>D  | Substitution | Nonsynonymous coding | 12% |
| MM18T | MROH2B  | maestro heat-like repeat family member 2B                        | CCDS47202.1     | chr5_41012804-41012804_G_T    | 1006L>M | Substitution | Nonsynonymous coding | 13% |
| MM18T | MROH2B  | maestro heat-like repeat family member 2B                        | CCDS47202.1     | chr5_41052629-41052629_G_A    | 390R>W  | Substitution | Nonsynonymous coding | 11% |
| MM18T | MROH2B  | maestro heat-like repeat family member 2B                        | CCDS47202.1     | chr5_41064658-41064658_G_T    | 126P>T  | Substitution | Nonsynonymous coding | 11% |
| MM18T | MROH2B  | maestro heat-like repeat family member 2B                        | CCDS47202.1     | chr5_41004914-41004914_G_A    | 1325R>X | Substitution | Nonsense             | 12% |
| MM18T | MROH7   | maestro heat-like repeat family member 7                         | CCDS41342.2     | chr1_55144516-55144516_C_T    | 680R>W  | Substitution | Nonsynonymous coding | 12% |
| MM18T | MRPL14  | mitochondrial ribosomal protein L14                              | CCDS34460.1     | chr6_44081621-44081621_C_T    | 133E>K  | Substitution | Nonsynonymous coding | 12% |
| MM18T | MRPL23  | mitochondrial ribosomal protein L23                              | ENST00000397297 | chr11_1993892-1993892_G_T     | 134R>I  | Substitution | Nonsynonymous coding | 11% |
| MM18T | MRPL24  | mitochondrial ribosomal protein L24                              | CCDS1155.1      | chr1_156707892-156707892_C_T  | 105R>Q  | Substitution | Nonsynonymous coding | 12% |
| MM18T | MRPL34  | mitochondrial ribosomal protein L34                              | CCDS12356.1     | chr19_17417124-17417124_C_T   | 72T>M   | Substitution | Nonsynonymous coding | 19% |
| MM18T | MRPS18A | mitochondrial ribosomal protein S18A                             | CCDS4906.1      | chr6_43643261-43643261_C_T    | 116E>K  | Substitution | Nonsynonymous coding | 11% |
| MM18T | MRPS30  | mitochondrial ribosomal protein S30                              | CCDS3951.1      | chr5_44811233-44811233_C_T    | 242R>X  | Substitution | Nonsense             | 12% |
| MM18T | MRPS9   | mitochondrial ribosomal protein S9                               | CCDS2065.1      | chr2_105654678-105654678_G_T  | 43R>I   | Substitution | Nonsynonymous coding | 11% |
| MM18T | MS4A15  | membrane-spanning 4-domains, subfamily A, member 15              | CCDS44617.1     | chr11_60540940-60540940_T_G   | 161F>V  | Substitution | Nonsynonymous coding | 11% |
| MM18T | MSANTD4 | Myb/SANT-like DNA-binding domain containing 4 with coiled-coils  | CCDS31663.1     | chr11_105881512-105881512_G_A | 45R>X   | Substitution | Nonsense             | 17% |

|       |         |                                                                   |             |                               |          |              |                      |     |
|-------|---------|-------------------------------------------------------------------|-------------|-------------------------------|----------|--------------|----------------------|-----|
| MM18T | MSH6    | mutS homolog 6 (E. coli)                                          | CCDS1836.1  | chr2_48026414-48026414_A_C    | 431K>T   | Substitution | Nonsynonymous coding | 14% |
| MM18T | MSH6    | mutS homolog 6 (E. coli)                                          | CCDS1836.1  | chr2_48028004-48028004_G_T    | 961R>I   | Substitution | Nonsynonymous coding | 16% |
| MM18T | MSH6    | mutS homolog 6 (E. coli)                                          | CCDS1836.1  | chr2_48033753-48033753_G_T    | 1322E>X  | Substitution | Nonsense             | 18% |
| MM18T | MSI1    | musashi RNA-binding protein 1                                     | CCDS9196.1  | chr12_120785275-120785275_G_A | 278A>V   | Substitution | Nonsynonymous coding | 16% |
| MM18T | MSLN    | mesothelin                                                        | CCDS32356.1 | chr16_815535-815535_C_T       | 238S>L   | Substitution | Nonsynonymous coding | 18% |
| MM18T | MSN     | moesin                                                            | CCDS14382.1 | chrX_64947698-64947698_G_A    | 40R>K    | Substitution | Nonsynonymous coding | 18% |
| MM18T | MST1R   | macrophage stimulating 1 receptor (c-met-related tyrosine kinase) | CCDS2807.1  | chr3_49933207-49933207_A_C    | 968L>R   | Substitution | Nonsynonymous coding | 16% |
| MM18T | MTA1    | metastasis associated 1                                           | CCDS32169.1 | chr14_105932850-105932850_T_C | 571V>A   | Substitution | Nonsynonymous coding | 19% |
| MM18T | MTA1    | metastasis associated 1                                           | CCDS32169.1 | chr14_105935823-105935823_G_T | 611Q>H   | Substitution | Nonsynonymous coding | 14% |
| MM18T | MTAP    | methylthioadenosine phosphorylase                                 | CCDS6509.1  | chr9_21815486-21815486_A_C    | 30T>P    | Substitution | Nonsynonymous coding | 12% |
| MM18T | MTERFD3 | MTERF domain containing 3                                         | CCDS9111.1  | chr12_107371417-107371417_A_C | 359F>C   | Substitution | Nonsynonymous coding | 12% |
| MM18T | MTERFD3 | MTERF domain containing 3                                         | CCDS9111.1  | chr12_107371335-107371335_T_C | 386*>W   | Substitution | Nonsynonymous coding | 10% |
| MM18T | MTFMT   | mitochondrial methionyl-tRNA formyltransferase                    | CCDS45280.1 | chr15_65312613-65312613_A     | NA       | Insertion    | Splice site acceptor | 10% |
| MM18T | MTHFD1L | methylenetetrahydrofolate dehydrogenase (NADP+ dependent) 1-like  | CCDS5228.1  | chr6_151203907-151203907_G_A  | 143E>K   | Substitution | Nonsynonymous coding | 11% |
| MM18T | MTHFD2  | methylenetetrahydrofolate dehydrogenase (NADP+ dependent) 2,      | CCDS1935.2  | chr2_74438391-74438391_C_A    | 246L>I   | Substitution | Nonsynonymous coding | 16% |
| MM18T | MTHFR   | methylenetetrahydrofolate reductase (NAD(P)H)                     | CCDS137.1   | chr1_11861223-11861223_C_T    | 157R>Q   | Substitution | Nonsynonymous coding | 13% |
| MM18T | MTMR10  | myotubularin related protein 10                                   | CCDS45204.1 | chr15_31246972-31246972_C_T   | 354V>I   | Substitution | Nonsynonymous coding | 16% |
| MM18T | MTMR14  | myotubularin related protein 14                                   | CCDS43043.1 | chr3_9726911-9726911_C_T      | 382R>W   | Substitution | Nonsynonymous coding | 14% |
| MM18T | MTMR4   | myotubularin related protein 4                                    | CCDS11608.1 | chr17_56581125-56581125_G_T   | 597F>L   | Substitution | Nonsynonymous coding | 15% |
| MM18T | MTMR4   | myotubularin related protein 4                                    | CCDS11608.1 | chr17_56581792-56581792_G_A   | 453R>C   | Substitution | Nonsynonymous coding | 14% |
| MM18T | MTMR6   | myotubularin related protein 6                                    | CCDS9313.1  | chr13_25823488-25823488_C_T   | 583R>Q   | Substitution | Nonsynonymous coding | 13% |
| MM18T | MTMR6   | myotubularin related protein 6                                    | CCDS9313.1  | chr13_25827912-25827912_C_T   | 446E>K   | Substitution | Nonsynonymous coding | 12% |
| MM18T | MTOR    | mechanistic target of rapamycin (serine/threonine kinase)         | CCDS127.1   | chr1_11206762-11206762_G_T    | 1553H>N  | Substitution | Nonsynonymous coding | 16% |
| MM18T | MTPN    | myotrophin                                                        | CCDS5842.1  | chr7_135661817-135661817_T_G  | 11K>T    | Substitution | Nonsynonymous coding | 14% |
| MM18T | MTUS1   | microtubule associated tumor suppressor 1                         | CCDS43717.1 | chr8_17513425-17513425_G_A    | 1019R>W  | Substitution | Nonsynonymous coding | 11% |
| MM18T | MTUS2   | microtubule associated tumor suppressor candidate 2               | CCDS45022.1 | chr13_29600847-29600847_C_T   | 681P>L   | Substitution | Nonsynonymous coding | 13% |
| MM18T | MTX2    | metaxin 2                                                         | CCDS2272.1  | chr2_177202369-177202369_C_T  | 257R>C   | Substitution | Nonsynonymous coding | 24% |
| MM18T | MUC16   | mucin 16, cell surface associated                                 | NM_024690   | chr19_9057087-9057087_A_G     | 10120V>A | Substitution | Nonsynonymous coding | 11% |
| MM18T | MUC16   | mucin 16, cell surface associated                                 | NM_024690   | chr19_9065963-9065963_C_A     | 7161E>D  | Substitution | Nonsynonymous coding | 12% |
| MM18T | MUC16   | mucin 16, cell surface associated                                 | NM_024690   | chr19_9066186-9066186_G_T     | 7087S>Y  | Substitution | Nonsynonymous coding | 13% |
| MM18T | MUC16   | mucin 16, cell surface associated                                 | NM_024690   | chr19_9066829-9066829_C_A     | 6873D>Y  | Substitution | Nonsynonymous coding | 13% |
| MM18T | MUC16   | mucin 16, cell surface associated                                 | NM_024690   | chr19_9068455-9068455_C_T     | 6331A>T  | Substitution | Nonsynonymous coding | 13% |

|       |        |                                                                                    |                 |                               |         |              |                      |     |
|-------|--------|------------------------------------------------------------------------------------|-----------------|-------------------------------|---------|--------------|----------------------|-----|
| MM18T | MUC16  | mucin 16, cell surface associated                                                  | NM_024690       | chr19_9084300-9084300_C_T     | 2505W>X | Substitution | Nonsense             | 14% |
| MM18T | MUC19  | mucin 19, oligomeric                                                               | ENST00000425730 | chr12_40821777-40821777_C_A   | 405L>M  | Substitution | Nonsynonymous coding | 16% |
| MM18T | MUC19  | mucin 19, oligomeric                                                               | ENST00000425730 | chr12_40868642-40868642_A_C   | 1606N>H | Substitution | Nonsynonymous coding | 14% |
| MM18T | MUC19  | mucin 19, oligomeric                                                               | ENST00000398702 | chr12_40894869-40894869_A_C   | 21K>T   | Substitution | Nonsynonymous coding | 14% |
| MM18T | MUC19  | mucin 19, oligomeric                                                               | ENST00000424466 | chr12_40929026-40929026_G_T   | 91E>D   | Substitution | Nonsynonymous coding | 12% |
| MM18T | MUC19  | mucin 19, oligomeric                                                               | ENST00000380816 | chr12_40954829-40954829_G_T   | 424R>I  | Substitution | Nonsynonymous coding | 11% |
| MM18T | MUC19  | mucin 19, oligomeric                                                               | ENST00000398702 | chr12_40923069-40923069_G_A   | ISV+1>  | Substitution | Splice site donor    | 11% |
| MM18T | MUC2   | mucin 2, oligomeric mucus/gel-forming                                              | NM_002457       | chr11_1087997-1087997_T_C     | 1158S>P | Substitution | Nonsynonymous coding | 15% |
| MM18T | MUC2   | mucin 2, oligomeric mucus/gel-forming                                              | NM_002457       | chr11_1095136-1095136_G_A     | 1982E>K | Substitution | Nonsynonymous coding | 20% |
| MM18T | MUC20  | mucin 20, cell surface associated                                                  | NM_152673       | chr3_195452804-195452804_C_A  | 273L>I  | Substitution | Nonsynonymous coding | 10% |
| MM18T | MUC4   | mucin 4, cell surface associated                                                   | CCDS3310.1      | chr3_195490389-195490389_C_T  | 487R>H  | Substitution | Nonsynonymous coding | 15% |
| MM18T | MUC4   | mucin 4, cell surface associated                                                   | NM_018406       | chr3_195516941-195516941_C_A  | 504E>X  | Substitution | Nonsense             | 14% |
| MM18T | MUM1   | melanoma associated antigen (mutated) 1                                            | CCDS12062.1     | chr19_1366310-1366310_A_G     | 432S>G  | Substitution | Nonsynonymous coding | 11% |
| MM18T | MUM1L1 | melanoma associated antigen (mutated) 1-like 1                                     | ENST00000337685 | chrX_105450655-105450655_A    | NA      | Insertion    | Frameshift           | 12% |
| MM18T | MURC   | muscle-related coiled-coil protein                                                 | NM_001018116    | chr9_103348635-103348635_G_A  | 333E>K  | Substitution | Nonsynonymous coding | 19% |
| MM18T | MUS81  | MUS81 endonuclease homolog (S. cerevisiae)                                         | CCDS8115.1      | chr11_65632276-65632276_G_T   | 421R>I  | Substitution | Nonsynonymous coding | 13% |
| MM18T | MVB12B | multivesicular body subunit 12B                                                    | CCDS35142.1     | chr9_129157901-129157901_G_A  | 196R>K  | Substitution | Nonsynonymous coding | 17% |
| MM18T | MX1    | myxovirus (influenza virus) resistance 1, interferon-inducible protein p78 (mouse) | CCDS13673.1     | chr21_42807818-42807818_G_A   | 54D>N   | Substitution | Nonsynonymous coding | 13% |
| MM18T | MXD1   | MAX dimerization protein 1                                                         | CCDS1896.1      | chr2_70162510-70162510_G_T    | 77E>D   | Substitution | Nonsynonymous coding | 12% |
| MM18T | MXRA5  | matrix-remodelling associated 5                                                    | CCDS14124.1     | chrX_3235210-3235210_G_A      | 2171S>L | Substitution | Nonsynonymous coding | 16% |
| MM18T | MXRA5  | matrix-remodelling associated 5                                                    | CCDS14124.1     | chrX_3242612-3242612_C_A      | 372E>X  | Substitution | Nonsense             | 15% |
| MM18T | MXRA7  | matrix-remodelling associated 7                                                    | CCDS32745.1     | chr17_74681186-74681186_C_A   | 156M>I  | Substitution | Nonsynonymous coding | 13% |
| MM18T | MYB    | v-myb myeloblastosis viral oncogene homolog (avian)                                | CCDS47481.1     | chr6_135507161-135507161_A_G  | ISV+3>  | Substitution | Splice site donor    | 11% |
| MM18T | MYBL2  | v-myb myeloblastosis viral oncogene homolog (avian)-like 2                         | CCDS13322.1     | chr20_42340200-42340200_G_A   | 560E>K  | Substitution | Nonsynonymous coding | 13% |
| MM18T | MYBPC1 | myosin binding protein C, slow type                                                | CCDS9083.1      | chr12_102061589-102061589_G_T | 812K>N  | Substitution | Nonsynonymous coding | 16% |
| MM18T | MYBPH  | myosin binding protein H                                                           | CCDS30975.1     | chr1_203139452-203139452_C_T  | 354V>I  | Substitution | Nonsynonymous coding | 13% |
| MM18T | MYCT1  | myc target 1                                                                       | CCDS5239.1      | chr6_153042915-153042915_G_T  | 79G>W   | Substitution | Nonsynonymous coding | 18% |
| MM18T | MYH1   | myosin, heavy chain 1, skeletal muscle, adult                                      | CCDS11155.1     | chr17_10397757-10397757_C_T   | 1861D>N | Substitution | Nonsynonymous coding | 17% |
| MM18T | MYH1   | myosin, heavy chain 1, skeletal muscle, adult                                      | CCDS11155.1     | chr17_10408518-10408518_G_T   | 799F>L  | Substitution | Nonsynonymous coding | 12% |
| MM18T | MYH1   | myosin, heavy chain 1, skeletal muscle, adult                                      | CCDS11155.1     | chr17_10408523-10408523_C_A   | 798G>W  | Substitution | Nonsynonymous coding | 13% |
| MM18T | MYH1   | myosin, heavy chain 1, skeletal muscle, adult                                      | CCDS11155.1     | chr17_10408726-10408726_C_A   | 759Q>H  | Substitution | Nonsynonymous coding | 17% |
| MM18T | MYH1   | myosin, heavy chain 1, skeletal muscle, adult                                      | CCDS11155.1     | chr17_10404997-10404997_C_A   | 1088E>X | Substitution | Nonsense             | 12% |

|       |        |                                                   |                 |                               |         |              |                      |     |
|-------|--------|---------------------------------------------------|-----------------|-------------------------------|---------|--------------|----------------------|-----|
| MM18T | MYH10  | myosin, heavy chain 10, non-muscle                | CCDS11144.1     | chr17_8393789-8393789_C_T     | 1554E>K | Substitution | Nonsynonymous coding | 17% |
| MM18T | MYH11  | myosin, heavy chain 11, smooth muscle             | CCDS45423.1     | chr16_15870007-15870007_G_A   | 280R>C  | Substitution | Nonsynonymous coding | 12% |
| MM18T | MYH11  | myosin, heavy chain 11, smooth muscle             | CCDS45423.1     | chr16_15931974-15931974_C_T   | 46E>K   | Substitution | Nonsynonymous coding | 18% |
| MM18T | MYH13  | myosin, heavy chain 13, skeletal muscle           | CCDS45613.1     | chr17_10233795-10233795_C_A   | 782D>Y  | Substitution | Nonsynonymous coding | 14% |
| MM18T | MYH13  | myosin, heavy chain 13, skeletal muscle           | CCDS45613.1     | chr17_10261074-10261074_C_A   | 239R>M  | Substitution | Nonsynonymous coding | 20% |
| MM18T | MYH14  | myosin, heavy chain 14, non-muscle                | CCDS46151.1     | chr19_50760735-50760735_G_A   | 709E>K  | Substitution | Nonsynonymous coding | 12% |
| MM18T | MYH14  | myosin, heavy chain 14, non-muscle                | CCDS46151.1     | chr19_50812967-50812967_G_A   | 1978D>N | Substitution | Nonsynonymous coding | 20% |
| MM18T | MYH15  | myosin, heavy chain 15                            | CCDS43127.1     | chr3_108129745-108129745_C_T  | 1414E>K | Substitution | Nonsynonymous coding | 15% |
| MM18T | MYH15  | myosin, heavy chain 15                            | CCDS43127.1     | chr3_108147493-108147493_G_T  | 1203S>Y | Substitution | Nonsynonymous coding | 14% |
| MM18T | MYH15  | myosin, heavy chain 15                            | CCDS43127.1     | chr3_108158613-108158613_T_G  | 1036N>H | Substitution | Nonsynonymous coding | 10% |
| MM18T | MYH4   | myosin, heavy chain 4, skeletal muscle            | CCDS11154.1     | chr17_10354133-10354133_C_A   | 1315Q>H | Substitution | Nonsynonymous coding | 12% |
| MM18T | MYH4   | myosin, heavy chain 4, skeletal muscle            | CCDS11154.1     | chr17_10356518-10356518_A_G   | 1021V>A | Substitution | Nonsynonymous coding | 11% |
| MM18T | MYH4   | myosin, heavy chain 4, skeletal muscle            | CCDS11154.1     | chr17_10359197-10359197_T_C   | 664T>A  | Substitution | Nonsynonymous coding | 16% |
| MM18T | MYH6   | myosin, heavy chain 6, cardiac muscle, alpha      | CCDS9600.1      | chr14_23857385-23857385_C_A   | 1446K>N | Substitution | Nonsynonymous coding | 18% |
| MM18T | MYH7   | myosin, heavy chain 7, cardiac muscle, beta       | CCDS9601.1      | chr14_23886446-23886446_T_C   | 1479T>A | Substitution | Nonsynonymous coding | 14% |
| MM18T | MYH7   | myosin, heavy chain 7, cardiac muscle, beta       | CCDS9601.1      | chr14_23890234-23890234_A_C   | 1090L>R | Substitution | Nonsynonymous coding | 12% |
| MM18T | MYH7   | myosin, heavy chain 7, cardiac muscle, beta       | CCDS9601.1      | chr14_23899792-23899792_C_T   | 326A>T  | Substitution | Nonsynonymous coding | 15% |
| MM18T | MYH8   | myosin, heavy chain 8, skeletal muscle, perinatal | CCDS11153.1     | chr17_10304496-10304496_G_T   | 1041L>M | Substitution | Nonsynonymous coding | 13% |
| MM18T | MYH8   | myosin, heavy chain 8, skeletal muscle, perinatal | CCDS11153.1     | chr17_10323354-10323354_A_G   | 64V>A   | Substitution | Nonsynonymous coding | 12% |
| MM18T | MYH8   | myosin, heavy chain 8, skeletal muscle, perinatal | CCDS11153.1     | chr17_10323468-10323468_C_T   | 26R>Q   | Substitution | Nonsynonymous coding | 11% |
| MM18T | MYL1   | myosin, light chain 1, alkali; skeletal, fast     | CCDS2390.1      | chr2_211179766-211179766_T_   | NA      | Deletion     | Frameshift           | 11% |
| MM18T | MYLK   | myosin light chain kinase                         | CCDS46896.1     | chr3_123418982-123418982_C_A  | 1111E>D | Substitution | Nonsynonymous coding | 11% |
| MM18T | MYLK   | myosin light chain kinase                         | CCDS46896.1     | chr3_123471249-123471249_C_A  | 101R>M  | Substitution | Nonsynonymous coding | 13% |
| MM18T | MYLK4  | myosin light chain kinase family, member 4        | ENST00000268446 | chr6_2679691-2679691_C_T      | 238R>Q  | Substitution | Nonsynonymous coding | 10% |
| MM18T | MYLK4  | myosin light chain kinase family, member 4        | CCDS34330.1     | chr6_2675277-2675277_T_C      | ISV+4>  | Substitution | Splice site donor    | 12% |
| MM18T | MYO15A | myosin XVA                                        | CCDS42271.1     | chr17_18045505-18045505_G_A   | 1921R>Q | Substitution | Nonsynonymous coding | 26% |
| MM18T | MYO15A | myosin XVA                                        | CCDS42271.1     | chr17_18047839-18047839_C_T   | 2069P>L | Substitution | Nonsynonymous coding | 12% |
| MM18T | MYO15A | myosin XVA                                        | CCDS42271.1     | chr17_18063266-18063266_G_T   | 3107E>D | Substitution | Nonsynonymous coding | 13% |
| MM18T | MYO16  | myosin XVI                                        | CCDS32008.1     | chr13_109472760-109472760_G_T | 293D>Y  | Substitution | Nonsynonymous coding | 13% |
| MM18T | MYO16  | myosin XVI                                        | CCDS32008.1     | chr13_109707439-109707439_C_T | 1010R>X | Substitution | Nonsense             | 12% |
| MM18T | MYO18A | myosin XVIII A                                    | CCDS45642.1     | chr17_27409344-27409344_T_G   | 2004K>Q | Substitution | Nonsynonymous coding | 12% |
| MM18T | MYO18A | myosin XVIII A                                    | CCDS45642.1     | chr17_27419968-27419968_G_A   | 1660R>C | Substitution | Nonsynonymous coding | 10% |

|       |        |                                                       |                 |                               |         |              |                      |     |
|-------|--------|-------------------------------------------------------|-----------------|-------------------------------|---------|--------------|----------------------|-----|
| MM18T | MYO18B | myosin XVIIIIB                                        | NM_032608       | chr22_26159308-26159308_G_T   | 50K>N   | Substitution | Nonsynonymous coding | 13% |
| MM18T | MYO18B | myosin XVIIIIB                                        | NM_032608       | chr22_26176035-26176035_G_A   | 694R>Q  | Substitution | Nonsynonymous coding | 11% |
| MM18T | MYO18B | myosin XVIIIIB                                        | NM_032608       | chr22_26270296-26270296_G_A   | 1332R>Q | Substitution | Nonsynonymous coding | 12% |
| MM18T | MYO18B | myosin XVIIIIB                                        | NM_032608       | chr22_26422733-26422733_G_T   | 2265G>C | Substitution | Nonsynonymous coding | 19% |
| MM18T | MYO18B | myosin XVIIIIB                                        | NM_032608       | chr22_26423603-26423603_G_A   | 2555D>N | Substitution | Nonsynonymous coding | 13% |
| MM18T | MYO1A  | myosin IA                                             | CCDS8929.1      | chr12_57424088-57424088_G_A   | 833R>W  | Substitution | Nonsynonymous coding | 12% |
| MM18T | MYO1B  | myosin IB                                             | CCDS46477.1     | chr2_192275827-192275827_G_T  | 934Q>H  | Substitution | Nonsynonymous coding | 12% |
| MM18T | MYO1B  | myosin IB                                             | CCDS46477.1     | chr2_192279297-192279297_A_C  | 1021K>Q | Substitution | Nonsynonymous coding | 15% |
| MM18T | MYO1E  | myosin IE                                             | CCDS32254.1     | chr15_59510116-59510116_C_T   | 361A>T  | Substitution | Nonsynonymous coding | 11% |
| MM18T | MYO1F  | myosin IF                                             | CCDS42494.1     | chr19_8591709-8591709_G_A     | 862A>V  | Substitution | Nonsynonymous coding | 11% |
| MM18T | MYO1F  | myosin IF                                             | CCDS42494.1     | chr19_8616706-8616706_G_A     | 230P>L  | Substitution | Nonsynonymous coding | 13% |
| MM18T | MYO1F  | myosin IF                                             | CCDS42494.1     | chr19_8618076-8618076_G_T     | 151L>I  | Substitution | Nonsynonymous coding | 18% |
| MM18T | MYO1H  | myosin IH                                             | NM_001101421    | chr12_109845672-109845672_C_T | 354T>M  | Substitution | Nonsynonymous coding | 14% |
| MM18T | MYO1H  | myosin IH                                             | NM_001101421    | chr12_109839045-109839045_C_T | 224R>X  | Substitution | Nonsense             | 12% |
| MM18T | MYO3A  | myosin IIIA                                           | CCDS7148.1      | chr10_26462851-26462851_G_A   | 1220D>N | Substitution | Nonsynonymous coding | 14% |
| MM18T | MYO7B  | myosin VIIB                                           | CCDS46405.1     | chr2_128331599-128331599_G_A  | 233E>K  | Substitution | Nonsynonymous coding | 15% |
| MM18T | MYO9A  | myosin IXA                                            | CCDS10239.1     | chr15_72141276-72141276_A_C   | 2249N>K | Substitution | Nonsynonymous coding | 11% |
| MM18T | MYO9A  | myosin IXA                                            | CCDS10239.1     | chr15_72175965-72175965_C_A   | 1790D>Y | Substitution | Nonsynonymous coding | 13% |
| MM18T | MYOCD  | myocardin                                             | CCDS11163.1     | chr17_12620711-12620711_G_A   | 76D>N   | Substitution | Nonsynonymous coding | 16% |
| MM18T | MYOCD  | myocardin                                             | CCDS11163.1     | chr17_12656052-12656052_G_A   | 483G>S  | Substitution | Nonsynonymous coding | 18% |
| MM18T | MYOF   | myoferlin                                             | CCDS41551.1     | chr10_95116511-95116511_C_T   | 1072R>H | Substitution | Nonsynonymous coding | 12% |
| MM18T | MYOF   | myoferlin                                             | CCDS41551.1     | chr10_95169497-95169497_C_A   | ISV-1>  | Substitution | Splice site acceptor | 17% |
| MM18T | MYOF   | myoferlin                                             | CCDS41551.1     | chr10_95211899-95211899_C_A   | ISV-1>  | Substitution | Splice site acceptor | 13% |
| MM18T | MYOM1  | myomesin 1                                            | CCDS45824.1     | chr18_3187557-3187557_G_A     | 284R>C  | Substitution | Nonsynonymous coding | 14% |
| MM18T | MYOZ1  | myozenin 1                                            | CCDS7330.1      | chr10_75397662-75397662_C_T   | 31G>D   | Substitution | Nonsynonymous coding | 11% |
| MM18T | MYOZ3  | myozenin 3                                            | CCDS4309.1      | chr5_150051413-150051413_G_A  | 123A>T  | Substitution | Nonsynonymous coding | 20% |
| MM18T | MYRFL  | myelin regulatory factor-like                         | ENST00000299350 | chr12_70330331-70330331_A_G   | 80I>V   | Substitution | Nonsynonymous coding | 10% |
| MM18T | N4BP2  | NEDD4 binding protein 2                               | CCDS3457.1      | chr4_40121887-40121887_C_A    | 719S>Y  | Substitution | Nonsynonymous coding | 13% |
| MM18T | N4BP3  | NEDD4 binding protein 3                               | CCDS34307.1     | chr5_177548988-177548988_T_C  | 541S>P  | Substitution | Nonsynonymous coding | 14% |
| MM18T | NAA16  | N(alpha)-acetyltransferase 16, NatA auxiliary subunit | CCDS9379.1      | chr13_41941631-41941631_G_T   | 532K>N  | Substitution | Nonsynonymous coding | 18% |
| MM18T | NAB1   | NGFI-A binding protein 1 (EGR1 binding protein 1)     | CCDS2307.1      | chr2_191551948-191551948_G_A  | 427R>Q  | Substitution | Nonsynonymous coding | 18% |
| MM18T | NADK   | NAD kinase                                            | CCDS30565.1     | chr1_1687958-1687958_G_T      | 161F>L  | Substitution | Nonsynonymous coding | 15% |



|       |         |                                                          |                 |                               |         |              |                      |     |
|-------|---------|----------------------------------------------------------|-----------------|-------------------------------|---------|--------------|----------------------|-----|
| MM18T | NAGA    | N-acetylgalactosaminidase, alpha-                        | CCDS14030.1     | chr22_42463171-42463171_C_A   | 150V>L  | Substitution | Nonsynonymous coding | 14% |
| MM18T | NALCN   | sodium leak channel, non-selective                       | CCDS9498.1      | chr13_101733934-101733934_C_T | 1277D>N | Substitution | Nonsynonymous coding | 14% |
| MM18T | NALCN   | sodium leak channel, non-selective                       | ENST00000376200 | chr13_101768944-101768944_C_A | ISV-1>  | Substitution | Splice site acceptor | 14% |
| MM18T | NAP1L3  | nucleosome assembly protein 1-like 3                     | CCDS14465.1     | chrX_92928220-92928220_A_C    | 28D>E   | Substitution | Nonsynonymous coding | 16% |
| MM18T | NAPEPLD | N-acyl phosphatidylethanolamine phospholipase D          | CCDS5729.1      | chr7_102760132-102760132_C_T  | 278R>Q  | Substitution | Nonsynonymous coding | 12% |
| MM18T | NAPEPLD | N-acyl phosphatidylethanolamine phospholipase D          | CCDS5729.1      | chr7_102769139-102769139_G_A  | 29R>W   | Substitution | Nonsynonymous coding | 13% |
| MM18T | NAPRT1  | nicotinate phosphoribosyltransferase domain containing 1 | CCDS6403.2      | chr8_144659478-144659478_C_T  | 177D>N  | Substitution | Nonsynonymous coding | 15% |
| MM18T | NAT10   | N-acetyltransferase 10 (GCN5-related)                    | CCDS7889.1      | chr11_34154577-34154577_C_T   | 541S>F  | Substitution | Nonsynonymous coding | 18% |
| MM18T | NAT14   | N-acetyltransferase 14 (GCN5-related, putative)          | CCDS12926.1     | chr19_55997138-55997138_G_T   | 21E>D   | Substitution | Nonsynonymous coding | 24% |
| MM18T | NAV2    | neuron navigator 2                                       | CCDS7851.2      | chr11_20070336-20070336_C_T   | 1322S>L | Substitution | Nonsynonymous coding | 15% |
| MM18T | NBAS    | neuroblastoma amplified sequence                         | CCDS1685.1      | chr2_15432878-15432878_C_T    | 1604E>K | Substitution | Nonsynonymous coding | 16% |
| MM18T | NBEAL1  | neurobeachin-like 1                                      | CCDS46495.1     | chr2_203948035-203948035_G_A  | 260E>K  | Substitution | Nonsynonymous coding | 14% |
| MM18T | NBEAL1  | neurobeachin-like 1                                      | CCDS46495.1     | chr2_203972704-203972704_G_A  | 552R>Q  | Substitution | Nonsynonymous coding | 13% |
| MM18T | NBEAL1  | neurobeachin-like 1                                      | CCDS46495.1     | chr2_203972637-203972637_C_T  | 530R>X  | Substitution | Nonsense             | 11% |
| MM18T | NBR1    | neighbor of BRCA1 gene 1                                 | CCDS45694.1     | chr17_41342708-41342708_C_T   | 260R>W  | Substitution | Nonsynonymous coding | 13% |
| MM18T | NCAM1   | neural cell adhesion molecule 1                          | NM_181351       | chr11_113075045-113075045_C_A | 56L>I   | Substitution | Nonsynonymous coding | 12% |
| MM18T | NCAM1   | neural cell adhesion molecule 1                          | NM_181351       | chr11_113075226-113075226_C_T | 116S>L  | Substitution | Nonsynonymous coding | 19% |
| MM18T | NCAPD2  | non-SMC condensin I complex, subunit D2                  | CCDS8548.1      | chr12_6631057-6631057_C_T     | 603S>L  | Substitution | Nonsynonymous coding | 10% |
| MM18T | NCAPD3  | non-SMC condensin II complex, subunit D3                 | CCDS31723.1     | chr11_134079353-134079353_C_A | 196E>X  | Substitution | Nonsense             | 11% |
| MM18T | NCAPH2  | non-SMC condensin II complex, subunit H2                 | CCDS14094.2     | chr22_50946826-50946826_G_T   | 20K>N   | Substitution | Nonsynonymous coding | 17% |
| MM18T | NCAPH2  | non-SMC condensin II complex, subunit H2                 | CCDS14094.2     | chr22_50957728-50957728_G_T   | 280K>N  | Substitution | Nonsynonymous coding | 13% |
| MM18T | NCBP2   | nuclear cap binding protein subunit 2, 20kDa             | CCDS3323.1      | chr3_196664454-196664454_C_T  | 109R>Q  | Substitution | Nonsynonymous coding | 15% |
| MM18T | NCEH1   | neutral cholesterol ester hydrolase 1                    | CCDS33893.1     | chr3_172353806-172353806_A_G  | 202L>P  | Substitution | Nonsynonymous coding | 10% |
| MM18T | NCK2    | NCK adaptor protein 2                                    | CCDS33266.1     | chr2_106471594-106471594_G_T  | 25K>N   | Substitution | Nonsynonymous coding | 13% |
| MM18T | NCKAP5  | NCK-associated protein 5                                 | CCDS46418.1     | chr2_133539618-133539618_C_A  | 1589R>I | Substitution | Nonsynonymous coding | 10% |
| MM18T | NCKAP5  | NCK-associated protein 5                                 | CCDS46418.1     | chr2_133540452-133540452_G_A  | 1311S>F | Substitution | Nonsynonymous coding | 11% |
| MM18T | NCKAP5  | NCK-associated protein 5                                 | CCDS46418.1     | chr2_133540468-133540468_C_T  | 1306A>T | Substitution | Nonsynonymous coding | 11% |
| MM18T | NCKAP5L | NCK-associated protein 5-like                            | CCDS41781.2     | chr12_50185726-50185726_C_T   | 1301E>K | Substitution | Nonsynonymous coding | 15% |
| MM18T | NCKAP5L | NCK-associated protein 5-like                            | ENST00000433948 | chr12_50186219-50186219_C_T   | 982C>Y  | Substitution | Nonsynonymous coding | 13% |
| MM18T | NCKIPSD | NCK interacting protein with SH3 domain                  | CCDS2776.1      | chr3_48718992-48718992_C_A    | 274E>X  | Substitution | Nonsense             | 13% |
| MM18T | NCLN    | nicalin                                                  | CCDS32869.1     | chr19_3192566-3192566_G_A     | 95E>K   | Substitution | Nonsynonymous coding | 22% |
| MM18T | NCOA3   | nuclear receptor coactivator 3                           | CCDS13407.1     | chr20_46262885-46262885_G_A   | 353R>Q  | Substitution | Nonsynonymous coding | 13% |

|       |         |                                                                             |              |                              |         |              |                      |     |
|-------|---------|-----------------------------------------------------------------------------|--------------|------------------------------|---------|--------------|----------------------|-----|
| MM18T | NCOA3   | nuclear receptor coactivator 3                                              | CCDS13407.1  | chr20_46264930-46264930_G_T  | 600E>D  | Substitution | Nonsynonymous coding | 10% |
| MM18T | NCOA6   | nuclear receptor coactivator 6                                              | CCDS13241.1  | chr20_33330377-33330377_C_T  | 1228R>H | Substitution | Nonsynonymous coding | 14% |
| MM18T | NCOA7   | nuclear receptor coactivator 7                                              | CCDS5132.1   | chr6_126236484-126236484_A_C | 701D>A  | Substitution | Nonsynonymous coding | 12% |
| MM18T | NCOR1   | nuclear receptor corepressor 1                                              | CCDS11175.1  | chr17_15938087-15938087_G_T  | 2376S>Y | Substitution | Nonsynonymous coding | 15% |
| MM18T | NCOR1   | nuclear receptor corepressor 1                                              | CCDS11175.1  | chr17_15950304-15950304_G_A  | 2214R>C | Substitution | Nonsynonymous coding | 15% |
| MM18T | NCR1    | natural cytotoxicity triggering receptor 1<br>[Source:HGNC Symbol;Acc:6731] | CCDS12911.1  | chr19_55417992-55417992_A_G  | 61H>R   | Substitution | Nonsynonymous coding | 12% |
| MM18T | NCR3    | natural cytotoxicity triggering receptor 3                                  | CCDS34397.1  | chr6_31557628-31557628_C_T   | 107V>M  | Substitution | Nonsynonymous coding | 17% |
| MM18T | NCR3    | natural cytotoxicity triggering receptor 3                                  | CCDS34397.1  | chr6_31557651-31557651_C_T   | 99R>Q   | Substitution | Nonsynonymous coding | 13% |
| MM18T | NCR3    | natural cytotoxicity triggering receptor 3                                  | CCDS47402.1  | chr6_31557106-31557106_C_A   | 186E>X  | Substitution | Nonsense             | 15% |
| MM18T | NCSTN   | nicastrin                                                                   | CCDS1203.1   | chr1_160322727-160322727_G_T | 349K>N  | Substitution | Nonsynonymous coding | 11% |
| MM18T | NCSTN   | nicastrin                                                                   | CCDS1203.1   | chr1_160322951-160322951_T_C | 368V>A  | Substitution | Nonsynonymous coding | 11% |
| MM18T | NDRG3   | NDRG family member 3                                                        | CCDS13285.1  | chr20_35294726-35294726_C_A  | 220D>Y  | Substitution | Nonsynonymous coding | 15% |
| MM18T | NDUFA10 | NADH dehydrogenase (ubiquinone) 1 alpha<br>subcomplex, 10, 42kDa            | CCDS2531.1   | chr2_240960776-240960776_C_A | 100D>Y  | Substitution | Nonsynonymous coding | 11% |
| MM18T | NDUFA3  | NADH dehydrogenase (ubiquinone) 1 alpha<br>subcomplex, 3, 9kDa              | CCDS12877.1  | chr19_54606441-54606441_G_T  | 10K>N   | Substitution | Nonsynonymous coding | 13% |
| MM18T | NDUFS6  | NADH dehydrogenase (ubiquinone) Fe-S<br>protein 6, 13kDa (NADH-coenzyme Q)  | CCDS3866.1   | chr5_1814528-1814528_G_A     | 88D>N   | Substitution | Nonsynonymous coding | 13% |
| MM18T | NDUFV1  | NADH dehydrogenase (ubiquinone)<br>flavoprotein 1, 51kDa                    | CCDS8173.1   | chr11_67378873-67378873_G_T  | ISV-1>  | Substitution | Splice site acceptor | 17% |
| MM18T | NDUFV3  | NADH dehydrogenase (ubiquinone)<br>flavoprotein 3, 10kDa                    | CCDS33572.1  | chr21_44329037-44329037_A_C  | 443D>A  | Substitution | Nonsynonymous coding | 11% |
| MM18T | NEB     | nebulin                                                                     | CCDS46424.1  | chr2_152369286-152369286_C_A | 6068E>D | Substitution | Nonsynonymous coding | 12% |
| MM18T | NEB     | nebulin                                                                     | CCDS46424.1  | chr2_152381765-152381765_A_G | 5694V>A | Substitution | Nonsynonymous coding | 11% |
| MM18T | NEB     | nebulin                                                                     | CCDS46424.1  | chr2_152417799-152417799_T_G | 4641N>H | Substitution | Nonsynonymous coding | 11% |
| MM18T | NEB     | nebulin                                                                     | CCDS46424.1  | chr2_152483661-152483661_G_T | 3158S>Y | Substitution | Nonsynonymous coding | 15% |
| MM18T | NEB     | nebulin                                                                     | CCDS46424.1  | chr2_152512699-152512699_G_T | 2155L>M | Substitution | Nonsynonymous coding | 14% |
| MM18T | NEB     | nebulin                                                                     | CCDS46424.1  | chr2_152522686-152522686_C_A | 1650R>I | Substitution | Nonsynonymous coding | 15% |
| MM18T | NEB     | nebulin                                                                     | CCDS46424.1  | chr2_152529069-152529069_C_A | 1371K>N | Substitution | Nonsynonymous coding | 13% |
| MM18T | NEB     | nebulin                                                                     | CCDS46424.1  | chr2_152548658-152548658_A_G | 674V>A  | Substitution | Nonsynonymous coding | 11% |
| MM18T | NEB     | nebulin                                                                     | CCDS46424.1  | chr2_152350385-152350385_T_C | ISV-4>  | Substitution | Splice site acceptor | 12% |
| MM18T | NEB     | nebulin                                                                     | NM_001164507 | chr2_152355892-152355892_C_A | 8012E>X | Substitution | Nonsense             | 15% |
| MM18T | NEDD4   | neural precursor cell expressed,<br>developmentally down-regulated 4, E3    | CCDS10156.1  | chr15_56207526-56207526_C_A  | 502D>Y  | Substitution | Nonsynonymous coding | 11% |
| MM18T | NEDD4   | neural precursor cell expressed,<br>developmentally down-regulated 4, E3    | CCDS10156.1  | chr15_56208180-56208180_G_T  | 284L>M  | Substitution | Nonsynonymous coding | 12% |
| MM18T | NEDD4   | neural precursor cell expressed,<br>developmentally down-regulated 4, E3    | CCDS10156.1  | chr15_56208692-56208692_G_A  | 113S>L  | Substitution | Nonsynonymous coding | 15% |
| MM18T | NEDD9   | neural precursor cell expressed,<br>developmentally down-regulated 9        | CCDS4520.1   | chr6_11213766-11213766_C_A   | 69E>D   | Substitution | Nonsynonymous coding | 16% |
| MM18T | NEFH    | neurofilament, heavy polypeptide                                            | CCDS13858.1  | chr22_29877074-29877074_C_T  | 275R>C  | Substitution | Nonsynonymous coding | 14% |

|       |         |                                                                           |                 |                              |         |              |                      |     |
|-------|---------|---------------------------------------------------------------------------|-----------------|------------------------------|---------|--------------|----------------------|-----|
| MM18T | NEFL    | neurofilament, light polypeptide                                          | ENST00000221169 | chr8_24811122-24811122_C_T   | 453E>K  | Substitution | Nonsynonymous coding | 15% |
| MM18T | NEIL3   | nei endonuclease VIII-like 3 (E. coli)                                    | CCDS3828.1      | chr4_178257458-178257458_C_A | 204L>I  | Substitution | Nonsynonymous coding | 10% |
| MM18T | NEIL3   | nei endonuclease VIII-like 3 (E. coli)                                    | CCDS3828.1      | chr4_178274633-178274633_G_T | 404R>I  | Substitution | Nonsynonymous coding | 14% |
| MM18T | NEK10   | NIMA-related kinase 10                                                    | CCDS46781.1     | chr3_27363700-27363700_G_T   | 139L>M  | Substitution | Nonsynonymous coding | 12% |
| MM18T | NEK10   | NIMA-related kinase 10                                                    | CCDS46781.1     | chr3_27387689-27387689_C_T   | 51D>N   | Substitution | Nonsynonymous coding | 14% |
| MM18T | NEK10   | NIMA-related kinase 10                                                    | CCDS46781.1     | chr3_27387706-27387706_A_C   | 45L>R   | Substitution | Nonsynonymous coding | 11% |
| MM18T | NEK10   | NIMA-related kinase 10                                                    | CCDS46781.1     | chr3_27350416-27350416_C_A   | ISV+1>  | Substitution | Splice site donor    | 16% |
| MM18T | NEK9    | NIMA-related kinase 9                                                     | CCDS9839.1      | chr14_75590781-75590781_G_A  | 122T>I  | Substitution | Nonsynonymous coding | 17% |
| MM18T | NELFB   | negative elongation factor complex member B                               | CCDS7040.1      | chr9_140151496-140151496_G_A | 196R>H  | Substitution | Nonsynonymous coding | 11% |
| MM18T | NEMF    | nuclear export mediator factor                                            | CCDS9694.1      | chr14_50318342-50318342_C_T  | 57R>Q   | Substitution | Nonsynonymous coding | 11% |
| MM18T | NET1    | neuroepithelial cell transforming 1                                       | CCDS41483.1     | chr10_5496435-5496435_C_A    | 326L>I  | Substitution | Nonsynonymous coding | 13% |
| MM18T | NEU2    | sialidase 2 (cytosolic sialidase)                                         | CCDS2501.1      | chr2_233897562-233897562_G_A | 61A>T   | Substitution | Nonsynonymous coding | 18% |
| MM18T | NEU4    | sialidase 4                                                               | CCDS2553.1      | chr2_242752544-242752544_C_A | 7F>L    | Substitution | Nonsynonymous coding | 12% |
| MM18T | NEURL2  | neuralized homolog 2 (Drosophila)                                         | CCDS13384.1     | chr20_44517407-44517407_T_G  | 283K>T  | Substitution | Nonsynonymous coding | 11% |
| MM18T | NEURL4  | neuralized homolog 4 (Drosophila)                                         | CCDS42251.1     | chr17_7227164-7227164_C_T    | 744E>K  | Substitution | Nonsynonymous coding | 15% |
| MM18T | NEUROD6 | neuronal differentiation 6                                                | CCDS5434.1      | chr7_31378075-31378075_T_C   | 270I>V  | Substitution | Nonsynonymous coding | 20% |
| MM18T | NEXN    | nexilin (F actin binding protein)                                         | CCDS41351.1     | chr1_78383357-78383357_G_T   | 45R>I   | Substitution | Nonsynonymous coding | 12% |
| MM18T | NF1     | neurofibromin 1                                                           | CCDS42292.1     | chr17_29653085-29653085_C_T  | 1695R>W | Substitution | Nonsynonymous coding | 12% |
| MM18T | NF1     | neurofibromin 1                                                           | CCDS42292.1     | chr17_29687539-29687539_T_G  | 2732V>G | Substitution | Nonsynonymous coding | 10% |
| MM18T | NF2     | neurofibromin 2 (merlin)                                                  | CCDS13861.1     | chr22_30069387-30069387_C_T  | 418R>C  | Substitution | Nonsynonymous coding | 13% |
| MM18T | NFATC1  | nuclear factor of activated T-cells, cytoplasmic, calcineurin-dependent 1 | CCDS32850.1     | chr18_77171425-77171425_G_A  | 371D>N  | Substitution | Nonsynonymous coding | 22% |
| MM18T | NFATC1  | nuclear factor of activated T-cells, cytoplasmic, calcineurin-dependent 1 | CCDS32850.1     | chr18_77193637-77193637_C_T  | 416R>W  | Substitution | Nonsynonymous coding | 17% |
| MM18T | NFATC1  | nuclear factor of activated T-cells, cytoplasmic, calcineurin-dependent 1 | CCDS32850.1     | chr18_77211003-77211003_C_T  | 534R>W  | Substitution | Nonsynonymous coding | 17% |
| MM18T | NFATC2  | nuclear factor of activated T-cells, cytoplasmic, calcineurin-dependent 2 | CCDS13437.1     | chr20_50049180-50049180_C_T  | 716E>K  | Substitution | Nonsynonymous coding | 21% |
| MM18T | NFATC2  | nuclear factor of activated T-cells, cytoplasmic, calcineurin-dependent 2 | CCDS13437.1     | chr20_50092175-50092175_T_G  | 452K>T  | Substitution | Nonsynonymous coding | 14% |
| MM18T | NFATC2  | nuclear factor of activated T-cells, cytoplasmic, calcineurin-dependent 2 | CCDS13437.1     | chr20_50140182-50140182_C_T  | 200D>N  | Substitution | Nonsynonymous coding | 16% |
| MM18T | NFATC2  | nuclear factor of activated T-cells, cytoplasmic, calcineurin-dependent 2 | CCDS13437.1     | chr20_50140217-50140217_G_A  | 188S>L  | Substitution | Nonsynonymous coding | 12% |
| MM18T | NFATC2  | nuclear factor of activated T-cells, cytoplasmic, calcineurin-dependent 2 | CCDS13437.1     | chr20_50140295-50140295_C_T  | 162R>H  | Substitution | Nonsynonymous coding | 15% |
| MM18T | NFATC2  | nuclear factor of activated T-cells, cytoplasmic, calcineurin-dependent 2 | CCDS13437.1     | chr20_50158963-50158963_C_A  | 26D>Y   | Substitution | Nonsynonymous coding | 17% |
| MM18T | NFATC4  | nuclear factor of activated T-cells, cytoplasmic, calcineurin-dependent 4 | CCDS45089.1     | chr14_24839599-24839599_G_T  | 395R>L  | Substitution | Nonsynonymous coding | 14% |
| MM18T | NFE2    | nuclear factor (erythroid-derived 2), 45kDa                               | CCDS8876.1      | chr12_54688936-54688936_A_G  | 33S>P   | Substitution | Nonsynonymous coding | 11% |
| MM18T | NFE2L2  | nuclear factor (erythroid-derived 2)-like 2                               | CCDS42782.1     | chr2_178095685-178095685_C_T | 549S>N  | Substitution | Nonsynonymous coding | 11% |

|       |        |                                                                  |                 |                               |         |              |                      |     |
|-------|--------|------------------------------------------------------------------|-----------------|-------------------------------|---------|--------------|----------------------|-----|
| MM18T | NFIB   | nuclear factor I/B                                               | CCDS6474.1      | chr9_14307390-14307390_C_A    | 54E>X   | Substitution | Nonsense             | 22% |
| MM18T | NFIL3  | nuclear factor, interleukin 3 regulated                          | CCDS6690.1      | chr9_94171908-94171908_G_A    | 370A>V  | Substitution | Nonsynonymous coding | 13% |
| MM18T | NFIX   | nuclear factor I/X (CCAAT-binding transcription factor)          | CCDS45996.1     | chr19_13135886-13135886_T_C   | 27S>P   | Substitution | Nonsynonymous coding | 11% |
| MM18T | NFRKB  | nuclear factor related to kappaB binding protein                 | CCDS8483.1      | chr11_129743830-129743830_G_T | 812S>Y  | Substitution | Nonsynonymous coding | 20% |
| MM18T | NGF    | nerve growth factor (beta polypeptide)                           | CCDS882.1       | chr1_115829170-115829170_G_A  | 83R>C   | Substitution | Nonsynonymous coding | 10% |
| MM18T | NGFR   | nerve growth factor receptor                                     | CCDS11549.1     | chr17_47587870-47587870_A_G   | 222D>G  | Substitution | Nonsynonymous coding | 21% |
| MM18T | NHS    | Nance-Horan syndrome (congenital cataracts and dental anomalies) | CCDS14181.1     | chrX_17710467-17710467_G_A    | 244R>Q  | Substitution | Nonsynonymous coding | 10% |
| MM18T | NHS    | Nance-Horan syndrome (congenital cataracts and dental anomalies) | CCDS14181.1     | chrX_17746029-17746029_C_A    | 1247A>D | Substitution | Nonsynonymous coding | 11% |
| MM18T | NHSL1  | NHS-like 1                                                       | CCDS47487.1     | chr6_138745684-138745684_G_A  | 1452S>L | Substitution | Nonsynonymous coding | 15% |
| MM18T | NHSL1  | NHS-like 1                                                       | CCDS47487.1     | chr6_138752118-138752118_T_C  | 1122T>A | Substitution | Nonsynonymous coding | 12% |
| MM18T | NID1   | nidogen 1                                                        | CCDS1608.1      | chr1_236189325-236189325_C_T  | 619V>I  | Substitution | Nonsynonymous coding | 12% |
| MM18T | NID1   | nidogen 1                                                        | CCDS1608.1      | chr1_236193036-236193036_G_A  | 518R>C  | Substitution | Nonsynonymous coding | 13% |
| MM18T | NID2   | nidogen 2 (osteonidogen)                                         | CCDS9706.1      | chr14_52520827-52520827_T_C   | 327Y>C  | Substitution | Nonsynonymous coding | 11% |
| MM18T | NID2   | nidogen 2 (osteonidogen)                                         | CCDS9706.1      | chr14_52535553-52535553_C_T   | 54E>K   | Substitution | Nonsynonymous coding | 12% |
| MM18T | NID2   | nidogen 2 (osteonidogen)                                         | CCDS9706.1      | chr14_52535610-52535610_C_T   | 35E>K   | Substitution | Nonsynonymous coding | 22% |
| MM18T | NINL   | ninein-like                                                      | CCDS33452.1     | chr20_25457690-25457690_G_A   | 746S>L  | Substitution | Nonsynonymous coding | 21% |
| MM18T | NIPA2  | non imprinted in Prader-Willi/Angelman syndrome 2                | CCDS10010.1     | chr15_23021324-23021324_G_A   | 5R>C    | Substitution | Nonsynonymous coding | 20% |
| MM18T | NIPAL1 | NIPA-like domain containing 1                                    | CCDS3479.1      | chr4_48037870-48037870_T_G    | 305L>R  | Substitution | Nonsynonymous coding | 15% |
| MM18T | NISCH  | nischarin                                                        | CCDS33767.1     | chr3_52518567-52518567_C_A    | 523L>I  | Substitution | Nonsynonymous coding | 12% |
| MM18T | NISCH  | nischarin                                                        | CCDS33767.1     | chr3_52506331-52506331_G_T    | 196E>X  | Substitution | Nonsense             | 18% |
| MM18T | NKD2   | naked cuticle homolog 2 (Drosophila)                             | CCDS3859.1      | chr5_1036440-1036440_G_A      | 243R>H  | Substitution | Nonsynonymous coding | 17% |
| MM18T | NKD2   | naked cuticle homolog 2 (Drosophila)                             | CCDS3859.1      | chr5_1038113-1038113_G_T      | 327E>D  | Substitution | Nonsynonymous coding | 17% |
| MM18T | NKD2   | naked cuticle homolog 2 (Drosophila)                             | ENST00000382730 | chr5_1038617-1038617_G_A      | 135A>T  | Substitution | Nonsynonymous coding | 17% |
| MM18T | NKTR   | natural killer-tumor recognition sequence                        | CCDS2702.1      | chr3_42662975-42662975_G_A    | 114R>Q  | Substitution | Nonsynonymous coding | 11% |
| MM18T | NKX2-1 | NK2 homeobox 1                                                   | CCDS41945.1     | chr14_36987135-36987135_G_A   | 185P>L  | Substitution | Nonsynonymous coding | 19% |
| MM18T | NKX2-2 | NK2 homeobox 2                                                   | CCDS13145.1     | chr20_21492941-21492941_G_A   | 148R>W  | Substitution | Nonsynonymous coding | 23% |
| MM18T | NKX2-4 | NK2 homeobox 4                                                   | CCDS42855.1     | chr20_21376859-21376859_G_A   | 252A>V  | Substitution | Nonsynonymous coding | 17% |
| MM18T | NKX2-6 | NK2 homeobox 6                                                   | ENST00000325017 | chr8_23564026-23564026_G_A    | 29S>L   | Substitution | Nonsynonymous coding | 22% |
| MM18T | NKX2-8 | NK2 homeobox 8                                                   | CCDS9660.1      | chr14_37050627-37050627_G_A   | 67S>L   | Substitution | Nonsynonymous coding | 39% |
| MM18T | NLGN1  | neuroligin 1                                                     | CCDS3222.1      | chr3_173999011-173999011_T_C  | 797F>S  | Substitution | Nonsynonymous coding | 13% |
| MM18T | NLGN2  | neuroligin 2                                                     | CCDS11103.1     | chr17_7318835-7318835_A_G     | 348H>R  | Substitution | Nonsynonymous coding | 19% |
| MM18T | NLGN2  | neuroligin 2                                                     | CCDS11103.1     | chr17_7319267-7319267_G_A     | 492R>Q  | Substitution | Nonsynonymous coding | 17% |

|       |              |                                                        |                 |                              |         |              |                      |     |
|-------|--------------|--------------------------------------------------------|-----------------|------------------------------|---------|--------------|----------------------|-----|
| MM18T | NLGN3        | neuroligin 3                                           | CCDS14407.1     | chrX_70367832-70367832_C_T   | 78P>L   | Substitution | Nonsynonymous coding | 13% |
| MM18T | NLGN3        | neuroligin 3                                           | CCDS14407.1     | chrX_70387645-70387645_G_T   | 546K>N  | Substitution | Nonsynonymous coding | 19% |
| MM18T | NLK          | nemo-like kinase                                       | CCDS11224.2     | chr17_26512209-26512209_C_A  | 385S>Y  | Substitution | Nonsynonymous coding | 13% |
| MM18T | NLRC3        | NLR family, CARD domain containing 3                   | ENST00000448023 | chr16_3613275-3613275_G_A    | 602R>C  | Substitution | Nonsynonymous coding | 14% |
| MM18T | NLRP12       | NLR family, pyrin domain containing 12                 | CCDS12864.1     | chr19_54299119-54299119_A_G  | 1031V>A | Substitution | Nonsynonymous coding | 13% |
| MM18T | NLRP14       | NLR family, pyrin domain containing 14                 | CCDS7776.1      | chr11_7068009-7068009_T_C    | 690M>T  | Substitution | Nonsynonymous coding | 12% |
| MM18T | NLRP2        | NLR family, pyrin domain containing 2                  | CCDS12913.1     | chr19_55501483-55501483_C_A  | 820D>E  | Substitution | Nonsynonymous coding | 11% |
| MM18T | NLRP4        | NLR family, pyrin domain containing 4                  | CCDS12936.1     | chr19_56369294-56369294_C_T  | 179R>W  | Substitution | Nonsynonymous coding | 13% |
| MM18T | NLRP5        | NLR family, pyrin domain containing 5                  | CCDS12938.1     | chr19_56538392-56538392_A_G  | 265T>A  | Substitution | Nonsynonymous coding | 19% |
| MM18T | NLRP5        | NLR family, pyrin domain containing 5                  | CCDS12938.1     | chr19_56539595-56539595_C_A  | 666L>M  | Substitution | Nonsynonymous coding | 12% |
| MM18T | NLRP5        | NLR family, pyrin domain containing 5                  | CCDS12938.1     | chr19_56572820-56572820_C_A  | 1177L>I | Substitution | Nonsynonymous coding | 13% |
| MM18T | NM_001013690 | -                                                      | NM_001013690    | chr12_52215291-52215291_C_T  | 303E>K  | Substitution | Nonsynonymous coding | 21% |
| MM18T | NM_001163391 | -                                                      | NM_001163391    | chr6_28360769-28360769_G_A   | 153R>X  | Substitution | Nonsense             | 16% |
| MM18T | NM_014004    | -                                                      | NM_014004       | chr5_140774817-140774817_C_A | 813L>I  | Substitution | Nonsynonymous coding | 13% |
| MM18T | NM_152736    | -                                                      | NM_152736       | chr6_28244425-28244425_G_T   | 196R>I  | Substitution | Nonsynonymous coding | 15% |
| MM18T | NMD3         | NMD3 homolog (S. cerevisiae)                           | CCDS3194.1      | chr3_160968091-160968091_G_A | 453R>Q  | Substitution | Nonsynonymous coding | 13% |
| MM18T | NMNAT3       | nicotinamide nucleotide adenyltransferase 3            | CCDS3111.1      | chr3_139280162-139280162_T_C | 113D>G  | Substitution | Nonsynonymous coding | 15% |
| MM18T | NMRK2        | nicotinamide riboside kinase 2                         | CCDS12115.1     | chr19_3938709-3938709_C_T    | 92S>L   | Substitution | Nonsynonymous coding | 12% |
| MM18T | NMT1         | N-myristoyltransferase 1                               | CCDS11494.1     | chr17_43176821-43176821_C_A  | 311F>L  | Substitution | Nonsynonymous coding | 11% |
| MM18T | NMUR1        | neuromedin U receptor 1                                | CCDS2486.1      | chr2_232392841-232392841_C_A | 297K>N  | Substitution | Nonsynonymous coding | 17% |
| MM18T | NOC3L        | nucleolar complex associated 3 homolog (S. cerevisiae) | CCDS7433.1      | chr10_96099593-96099593_C_T  | 622R>Q  | Substitution | Nonsynonymous coding | 16% |
| MM18T | NOD1         | nucleotide-binding oligomerization domain containing 1 | CCDS5427.1      | chr7_30485800-30485800_G_T   | 804L>I  | Substitution | Nonsynonymous coding | 14% |
| MM18T | NOL12        | nucleolar protein 12                                   | CCDS13955.1     | chr22_38087303-38087303_G_A  | 201R>H  | Substitution | Nonsynonymous coding | 19% |
| MM18T | NOL8         | nucleolar protein 8                                    | CCDS47993.1     | chr9_95063870-95063870_G_T   | 1046F>L | Substitution | Nonsynonymous coding | 20% |
| MM18T | NOM1         | nucleolar protein with MIF4G domain 1                  | CCDS34787.1     | chr7_156742894-156742894_G_A | 155A>T  | Substitution | Nonsynonymous coding | 19% |
| MM18T | NOS2         | nitric oxide synthase 2, inducible                     | CCDS11223.1     | chr17_26125769-26125769_C_A  | 23D>Y   | Substitution | Nonsynonymous coding | 11% |
| MM18T | NOTCH1       | notch 1                                                | CCDS43905.1     | chr9_139403440-139403440_C_T | 1018C>Y | Substitution | Nonsynonymous coding | 18% |
| MM18T | NOTCH2       | notch 2                                                | CCDS908.1       | chr1_120461167-120461167_G_A | 1931R>C | Substitution | Nonsynonymous coding | 12% |
| MM18T | NOTCH3       | notch 3                                                | CCDS12326.1     | chr19_15285027-15285027_C_T  | 1530D>N | Substitution | Nonsynonymous coding | 21% |
| MM18T | NOTCH4       | notch 4                                                | CCDS34420.1     | chr6_32184829-32184829_C_A   | 585R>L  | Substitution | Nonsynonymous coding | 12% |
| MM18T | NOTCH4       | notch 4                                                | CCDS34420.1     | chr6_32188854-32188854_G_A   | 234R>W  | Substitution | Nonsynonymous coding | 15% |
| MM18T | NOTO         | notochord homeobox                                     | CCDS46335.1     | chr2_73435692-73435692_G_A   | 183G>R  | Substitution | Nonsynonymous coding | 13% |

|       |        |                                                                                          |             |                               |         |              |                      |     |
|-------|--------|------------------------------------------------------------------------------------------|-------------|-------------------------------|---------|--------------|----------------------|-----|
| MM18T | NOTUM  | notum pectinacetyltransferase homolog (Drosophila)                                       | CCDS32771.2 | chr17_79914942-79914942_C_T   | 235G>D  | Substitution | Nonsynonymous coding | 26% |
| MM18T | NOVA1  | neuro-oncological ventral antigen 1                                                      | CCDS32061.1 | chr14_26918151-26918151_T_C   | 180N>D  | Substitution | Nonsynonymous coding | 15% |
| MM18T | NOX1   | NADPH oxidase 1                                                                          | CCDS14474.1 | chrX_100105165-100105165_C_T  | 370E>K  | Substitution | Nonsynonymous coding | 12% |
| MM18T | NOX3   | NADPH oxidase 3                                                                          | CCDS5250.1  | chr6_155757671-155757671_G_A  | 227R>X  | Substitution | Nonsense             | 17% |
| MM18T | NPAS2  | neuronal PAS domain protein 2                                                            | CCDS2048.1  | chr2_101609901-101609901_C_T  | 735A>V  | Substitution | Nonsynonymous coding | 15% |
| MM18T | NPAT   | nuclear protein, ataxia-telangiectasia locus                                             | CCDS41710.1 | chr11_108043828-108043828_G_A | 628S>L  | Substitution | Nonsynonymous coding | 11% |
| MM18T | NPAT   | nuclear protein, ataxia-telangiectasia locus                                             | CCDS41710.1 | chr11_108058826-108058826_T_G | 213S>R  | Substitution | Nonsynonymous coding | 21% |
| MM18T | NPC1   | Niemann-Pick disease, type C1                                                            | CCDS11878.1 | chr18_21136453-21136453_G_T   | 360F>L  | Substitution | Nonsynonymous coding | 22% |
| MM18T | NPFRR2 | neuropeptide FF receptor 2                                                               | CCDS3551.1  | chr4_73013492-73013492_A_C    | 511E>A  | Substitution | Nonsynonymous coding | 12% |
| MM18T | NPHP1  | nephronophthisis 1 (juvenile)                                                            | CCDS2086.1  | chr2_110922275-110922275_G_A  | 254A>V  | Substitution | Nonsynonymous coding | 22% |
| MM18T | NPHP4  | nephronophthisis 4                                                                       | CCDS44052.1 | chr1_5923360-5923360_C_T      | 1416E>K | Substitution | Nonsynonymous coding | 15% |
| MM18T | NPHP4  | nephronophthisis 4                                                                       | CCDS44052.1 | chr1_5926455-5926455_C_A      | 1208D>Y | Substitution | Nonsynonymous coding | 26% |
| MM18T | NPHP4  | nephronophthisis 4                                                                       | CCDS44052.1 | chr1_5927113-5927113_C_T      | 1179V>I | Substitution | Nonsynonymous coding | 13% |
| MM18T | NPHP4  | nephronophthisis 4                                                                       | CCDS44052.1 | chr1_5969252-5969252_C_T      | 488R>Q  | Substitution | Nonsynonymous coding | 12% |
| MM18T | NPHS1  | nephrosis 1, congenital, Finnish type (nephrin)                                          | CCDS32996.1 | chr19_36322616-36322616_A_T   | 1072L>H | Substitution | Nonsynonymous coding | 14% |
| MM18T | NPHS1  | nephrosis 1, congenital, Finnish type (nephrin)                                          | CCDS32996.1 | chr19_36333441-36333441_C_A   | 782E>D  | Substitution | Nonsynonymous coding | 16% |
| MM18T | NPHS1  | nephrosis 1, congenital, Finnish type (nephrin)                                          | CCDS32996.1 | chr19_36341309-36341309_C_T   | 189E>K  | Substitution | Nonsynonymous coding | 15% |
| MM18T | NPPB   | natriuretic peptide B                                                                    | CCDS140.1   | chr1_11918387-11918387_C_T    | 91R>H   | Substitution | Nonsynonymous coding | 16% |
| MM18T | NPR2   | natriuretic peptide receptor B/guanylate cyclase B (atrionatriuretic peptide receptor B) | CCDS6590.1  | chr9_35808830-35808830_G_A    | 989R>Q  | Substitution | Nonsynonymous coding | 10% |
| MM18T | NPY    | neuropeptide Y                                                                           | CCDS5387.1  | chr7_24324942-24324942_C_T    | 28A>V   | Substitution | Nonsynonymous coding | 14% |
| MM18T | NR1D1  | nuclear receptor subfamily 1, group D, member 1                                          | CCDS11361.1 | chr17_38249341-38249341_G_T   | 614Q>K  | Substitution | Nonsynonymous coding | 16% |
| MM18T | NR1D2  | nuclear receptor subfamily 1, group D, member 2                                          | CCDS33718.1 | chr3_24004057-24004057_G_T    | 369K>N  | Substitution | Nonsynonymous coding | 11% |
| MM18T | NR1H3  | nuclear receptor subfamily 1, group H, member 3                                          | CCDS7929.1  | chr11_47290117-47290117_C_A   | 405P>Q  | Substitution | Nonsynonymous coding | 12% |
| MM18T | NR1H4  | nuclear receptor subfamily 1, group H, member 4                                          | CCDS9078.1  | chr12_100930323-100930323_C_A | 252L>I  | Substitution | Nonsynonymous coding | 15% |
| MM18T | NR1H4  | nuclear receptor subfamily 1, group H, member 4                                          | CCDS9078.1  | chr12_100957220-100957220_G_A | 458D>N  | Substitution | Nonsynonymous coding | 15% |
| MM18T | NR2F1  | nuclear receptor subfamily 2, group F, member 1                                          | CCDS4068.1  | chr5_92923968-92923968_C_T    | 270P>L  | Substitution | Nonsynonymous coding | 21% |
| MM18T | NR2F2  | nuclear receptor subfamily 2, group F, member 2                                          | CCDS10375.1 | chr15_96877355-96877355_G_A   | 165A>T  | Substitution | Nonsynonymous coding | 17% |
| MM18T | NR2F6  | nuclear receptor subfamily 2, group F, member 6                                          | CCDS12352.1 | chr19_17343384-17343384_G_A   | 331A>V  | Substitution | Nonsynonymous coding | 12% |
| MM18T | NR3C2  | nuclear receptor subfamily 3, group C, member 2                                          | CCDS3772.1  | chr4_149357361-149357361_C_T  | 218A>T  | Substitution | Nonsynonymous coding | 12% |
| MM18T | NR4A1  | nuclear receptor subfamily 4, group A, member 1                                          | CCDS8818.1  | chr12_52448840-52448840_C_T   | 243S>L  | Substitution | Nonsynonymous coding | 12% |
| MM18T | NR4A2  | nuclear receptor subfamily 4, group A, member 2                                          | CCDS2201.1  | chr2_157182773-157182773_G_A  | 477R>C  | Substitution | Nonsynonymous coding | 14% |
| MM18T | NR4A2  | nuclear receptor subfamily 4, group A, member 2                                          | CCDS2201.1  | chr2_157184954-157184954_C_T  | 319R>Q  | Substitution | Nonsynonymous coding | 15% |

|       |        |                                                  |                 |                               |         |              |                      |     |
|-------|--------|--------------------------------------------------|-----------------|-------------------------------|---------|--------------|----------------------|-----|
| MM18T | NR4A2  | nuclear receptor subfamily 4, group A, member 2  | CCDS2201.1      | chr2_157185870-157185870_C_T  | 277V>M  | Substitution | Nonsynonymous coding | 11% |
| MM18T | NR4A3  | nuclear receptor subfamily 4, group A, member 3  | CCDS6742.1      | chr9_102595035-102595035_G_T  | 350R>I  | Substitution | Nonsynonymous coding | 16% |
| MM18T | NR5A2  | nuclear receptor subfamily 5, group A, member 2  | CCDS1401.1      | chr1_200143274-200143274_A_G  | 521H>R  | Substitution | Nonsynonymous coding | 15% |
| MM18T | NRAP   | nebulin-related anchoring protein                | CCDS7579.1      | chr10_115405685-115405685_C_A | 337D>Y  | Substitution | Nonsynonymous coding | 10% |
| MM18T | NRG3   | neuregulin 3                                     | CCDS31233.1     | chr10_84118623-84118623_C_T   | 318R>W  | Substitution | Nonsynonymous coding | 15% |
| MM18T | NRIP1  | nuclear receptor interacting protein 1           | CCDS13568.1     | chr21_16340011-16340011_G_A   | 168S>F  | Substitution | Nonsynonymous coding | 10% |
| MM18T | NRIP2  | nuclear receptor interacting protein 2           | CCDS8514.1      | chr12_2944115-2944115_C_A     | 12R>I   | Substitution | Nonsynonymous coding | 14% |
| MM18T | NRK    | Nik related kinase                               | NM_198465       | chrX_105139471-105139471_A    | NA      | Insertion    | Frameshift           | 10% |
| MM18T | NRK    | Nik related kinase                               | NM_198465       | chrX_105153045-105153045_T_C  | 471L>P  | Substitution | Nonsynonymous coding | 12% |
| MM18T | NRXN1  | neurexin 1                                       | CCDS46282.1     | chr2_50318622-50318622_T_C    | 1226K>R | Substitution | Nonsynonymous coding | 13% |
| MM18T | NRXN1  | neurexin 1                                       | CCDS46282.1     | chr2_50765750-50765750_C_T    | 635R>H  | Substitution | Nonsynonymous coding | 12% |
| MM18T | NRXN1  | neurexin 1                                       | CCDS46282.1     | chr2_51255053-51255053_C_T    | 120R>H  | Substitution | Nonsynonymous coding | 14% |
| MM18T | NRXN1  | neurexin 1                                       | CCDS46282.1     | chr2_50848342-50848342_C_T    | ISV+1>  | Substitution | Splice site donor    | 14% |
| MM18T | NRXN2  | neurexin 2                                       | CCDS8077.1      | chr11_64390362-64390362_C_T   | 1346V>M | Substitution | Nonsynonymous coding | 18% |
| MM18T | NRXN3  | neurexin 3                                       | CCDS9870.1      | chr14_79181309-79181309_G_A   | 251R>Q  | Substitution | Nonsynonymous coding | 16% |
| MM18T | NRXN3  | neurexin 3                                       | CCDS9870.1      | chr14_80328277-80328277_G_T   | 1052Q>H | Substitution | Nonsynonymous coding | 14% |
| MM18T | NSD1   | nuclear receptor binding SET domain protein 1    | CCDS4412.1      | chr5_176710827-176710827_C_T  | 2017R>W | Substitution | Nonsynonymous coding | 11% |
| MM18T | NSF    | N-ethylmaleimide-sensitive factor                | CCDS42354.1     | chr17_44788350-44788350_G_T   | 498D>Y  | Substitution | Nonsynonymous coding | 12% |
| MM18T | NSMCE2 | non-SMC element 2, MMS21 homolog (S. cerevisiae) | CCDS6356.1      | chr8_126379056-126379056_C_A  | 225L>I  | Substitution | Nonsynonymous coding | 12% |
| MM18T | NSUN2  | NOP2/Sun RNA methyltransferase family, member 2  | CCDS3869.1      | chr5_6600283-6600283_C_T      | 687R>Q  | Substitution | Nonsynonymous coding | 10% |
| MM18T | NSUN2  | NOP2/Sun RNA methyltransferase family, member 2  | CCDS3869.1      | chr5_6600218-6600218_C_A      | 709E>X  | Substitution | Nonsense             | 13% |
| MM18T | NSUN2  | NOP2/Sun RNA methyltransferase family, member 2  | CCDS3869.1      | chr5_6600284-6600284_G_A      | 687R>X  | Substitution | Nonsense             | 14% |
| MM18T | NT5DC3 | 5'-nucleotidase domain containing 3              | CCDS41824.1     | chr12_104190707-104190707_C_T | 240D>N  | Substitution | Nonsynonymous coding | 10% |
| MM18T | NT5DC4 | 5'-nucleotidase domain containing 4              | ENST00000327581 | chr2_113479661-113479661_G_A  | 62D>N   | Substitution | Nonsynonymous coding | 11% |
| MM18T | NT5DC4 | 5'-nucleotidase domain containing 4              | ENST00000327581 | chr2_113482820-113482820_A_G  | ISV+3>  | Substitution | Splice site donor    | 13% |
| MM18T | NTAN1  | N-terminal asparagine amidase                    | CCDS10558.1     | chr16_15135513-15135513_C_A   | 152D>Y  | Substitution | Nonsynonymous coding | 11% |
| MM18T | NTSR1  | neurotensin receptor 1 (high affinity)           | CCDS13502.1     | chr20_61340815-61340815_T_C   | 86F>L   | Substitution | Nonsynonymous coding | 10% |
| MM18T | NTSR2  | neurotensin receptor 2                           | CCDS1681.1      | chr2_11809721-11809721_C_T    | 179E>K  | Substitution | Nonsynonymous coding | 16% |
| MM18T | NUAK1  | NUAK family, SNF1-like kinase, 1                 | CCDS31892.1     | chr12_106460776-106460776_C_T | 597R>H  | Substitution | Nonsynonymous coding | 15% |
| MM18T | NUAK2  | NUAK family, SNF1-like kinase, 2                 | CCDS1453.1      | chr1_205274382-205274382_C_A  | 256K>N  | Substitution | Nonsynonymous coding | 11% |
| MM18T | NUCB2  | nucleobindin 2                                   | CCDS41623.1     | chr11_17351770-17351770_G_T   | 367E>X  | Substitution | Nonsense             | 10% |
| MM18T | NUDCD1 | NudC domain containing 1                         | CCDS6312.1      | chr8_110308681-110308681_C_A  | 131D>Y  | Substitution | Nonsynonymous coding | 13% |

|       |         |                                                                      |                 |                               |         |              |                      |     |
|-------|---------|----------------------------------------------------------------------|-----------------|-------------------------------|---------|--------------|----------------------|-----|
| MM18T | NUDT12  | nudix (nucleoside diphosphate linked moiety X)-type motif 12         | CCDS4096.1      | chr5_102894850-102894850_G_A  | 176L>F  | Substitution | Nonsynonymous coding | 10% |
| MM18T | NUDT21  | nudix (nucleoside diphosphate linked moiety X)-type motif 21         | CCDS10760.1     | chr16_56473613-56473613_C_T   | 143D>N  | Substitution | Nonsynonymous coding | 16% |
| MM18T | NUFIP2  | nuclear fragile X mental retardation protein interacting protein 2   | CCDS32600.1     | chr17_27613154-27613154_C_T   | 620E>K  | Substitution | Nonsynonymous coding | 14% |
| MM18T | NUGGC   | nuclear GTPase, germinal center associated                           | CCDS47833.1     | chr8_27922173-27922173_T_G    | 263M>L  | Substitution | Nonsynonymous coding | 13% |
| MM18T | NUMA1   | nuclear mitotic apparatus protein 1                                  | CCDS31633.1     | chr11_71721894-71721894_C_A   | 1553E>X | Substitution | Nonsense             | 13% |
| MM18T | NUP153  | nucleoporin 153kDa                                                   | CCDS4541.1      | chr6_17637476-17637476_T_A    | 791K>I  | Substitution | Nonsynonymous coding | 17% |
| MM18T | NUP155  | nucleoporin 155kDa                                                   | CCDS3921.1      | chr5_37307531-37307531_C_A    | 924R>I  | Substitution | Nonsynonymous coding | 12% |
| MM18T | NUP205  | nucleoporin 205kDa                                                   | CCDS34759.1     | chr7_135261804-135261804_G_T  | 192Q>H  | Substitution | Nonsynonymous coding | 15% |
| MM18T | NUP210L | nucleoporin 210kDa-like                                              | CCDS41399.1     | chr1_153991414-153991414_G_A  | 1550R>X | Substitution | Nonsense             | 16% |
| MM18T | NUP214  | nucleoporin 214kDa                                                   | CCDS6940.1      | chr9_134021575-134021575_C_T  | 610S>L  | Substitution | Nonsynonymous coding | 10% |
| MM18T | NUP35   | nucleoporin 35kDa                                                    | CCDS2290.1      | chr2_184016352-184016352_G_A  | 172D>N  | Substitution | Nonsynonymous coding | 13% |
| MM18T | NUP62CL | nucleoporin 62kDa C-terminal like                                    | CCDS14527.1     | chrX_106396404-106396404_C_A  | 176E>D  | Substitution | Nonsynonymous coding | 13% |
| MM18T | NUP85   | nucleoporin 85kDa                                                    | CCDS32730.1     | chr17_73230766-73230766_G_T   | 550E>D  | Substitution | Nonsynonymous coding | 13% |
| MM18T | NUP98   | nucleoporin 98kDa                                                    | CCDS7746.1      | chr11_3704657-3704657_G_A     | 1564A>V | Substitution | Nonsynonymous coding | 16% |
| MM18T | NUP98   | nucleoporin 98kDa                                                    | CCDS7746.1      | chr11_3752727-3752727_T_C     | 542R>G  | Substitution | Nonsynonymous coding | 14% |
| MM18T | NUP98   | nucleoporin 98kDa                                                    | CCDS7746.1      | chr11_3723895-3723895_C_A     | 1104E>X | Substitution | Nonsense             | 13% |
| MM18T | NUPR1   | nuclear protein, transcriptional regulator, 1                        | CCDS42137.1     | chr16_28549361-28549361_C_A   | 94K>N   | Substitution | Nonsynonymous coding | 16% |
| MM18T | NUSAP1  | nucleolar and spindle associated protein 1                           | CCDS45234.1     | chr15_41641337-41641337_G_T   | 68E>D   | Substitution | Nonsynonymous coding | 11% |
| MM18T | NVL     | nuclear VCP-like                                                     | CCDS1541.1      | chr1_224463133-224463133_G_A  | 664R>X  | Substitution | Nonsense             | 16% |
| MM18T | NXN     | nucleoredoxin                                                        | CCDS10998.1     | chr17_722779-722779_C_A       | 240E>D  | Substitution | Nonsynonymous coding | 11% |
| MM18T | NXPE2   | neurexophilin and PC-esterase domain family, member 2                | CCDS44738.1     | chr11_114577516-114577516_G_T | 515R>I  | Substitution | Nonsynonymous coding | 13% |
| MM18T | NYAP2   | neuronal tyrosine-phosphorylated phosphoinositide-3-kinase adaptor 2 | CCDS46529.1     | chr2_226447575-226447575_C_T  | 481S>L  | Substitution | Nonsynonymous coding | 14% |
| MM18T | NYX     | nyctalopin                                                           | CCDS14256.1     | chrX_41332851-41332851_G_A    | 49D>N   | Substitution | Nonsynonymous coding | 17% |
| MM18T | OBSCN   | obscurin, cytoskeletal calmodulin and titin-interacting RhoGEF       | NM_001098623    | chr1_228475418-228475418_G_A  | 3190A>T | Substitution | Nonsynonymous coding | 13% |
| MM18T | OBSCN   | obscurin, cytoskeletal calmodulin and titin-interacting RhoGEF       | ENST00000366707 | chr1_228491399-228491399_G_T  | 1278D>Y | Substitution | Nonsynonymous coding | 18% |
| MM18T | OBSCN   | obscurin, cytoskeletal calmodulin and titin-interacting RhoGEF       | NM_001098623    | chr1_228496064-228496064_C_A  | 4240S>Y | Substitution | Nonsynonymous coding | 23% |
| MM18T | OBSCN   | obscurin, cytoskeletal calmodulin and titin-interacting RhoGEF       | NM_001098623    | chr1_228556111-228556111_C_G  | 6587D>E | Substitution | Nonsynonymous coding | 19% |
| MM18T | OBSCN   | obscurin, cytoskeletal calmodulin and titin-interacting RhoGEF       | NM_001098623    | chr1_228558944-228558944_C_T  | 6822P>L | Substitution | Nonsynonymous coding | 17% |
| MM18T | OBSCN   | obscurin, cytoskeletal calmodulin and titin-interacting RhoGEF       | NM_001098623    | chr1_228559337-228559337_G_A  | 6953G>D | Substitution | Nonsynonymous coding | 13% |
| MM18T | OBSCN   | obscurin, cytoskeletal calmodulin and titin-interacting RhoGEF       | NM_001098623    | chr1_228560126-228560126_C_T  | 7216A>V | Substitution | Nonsynonymous coding | 26% |
| MM18T | OC90    | otoconin 90                                                          | CCDS47919.1     | chr8_133053839-133053839_C_A  | 93D>Y   | Substitution | Nonsynonymous coding | 12% |
| MM18T | ODF1    | outer dense fiber of sperm tails 1                                   | CCDS6293.1      | chr8_103564043-103564043_G_A  | 30E>K   | Substitution | Nonsynonymous coding | 14% |



|       |         |                                                                                     |                 |                               |        |              |                      |     |
|-------|---------|-------------------------------------------------------------------------------------|-----------------|-------------------------------|--------|--------------|----------------------|-----|
| MM18T | ODF1    | outer dense fiber of sperm tails 1                                                  | CCDS6293.1      | chr8_103564206-103564206_G_A  | 84R>Q  | Substitution | Nonsynonymous coding | 16% |
| MM18T | ODF4    | outer dense fiber of sperm tails 4                                                  | CCDS11140.1     | chr17_8243581-8243581_G_T     | 71R>I  | Substitution | Nonsynonymous coding | 10% |
| MM18T | OGFOD2  | 2-oxoglutarate and iron-dependent oxygenase domain containing 2                     | CCDS41855.1     | chr12_123463411-123463411_G_A | 155D>N | Substitution | Nonsynonymous coding | 19% |
| MM18T | OGFOD3  | 2-oxoglutarate and iron-dependent oxygenase domain containing 3                     | CCDS11812.1     | chr17_80356167-80356167_G_A   | 243S>L | Substitution | Nonsynonymous coding | 10% |
| MM18T | OGN     | osteoglycin                                                                         | CCDS6695.1      | chr9_95148500-95148500_G_A    | 237R>C | Substitution | Nonsynonymous coding | 19% |
| MM18T | OGT     | O-linked N-acetylglucosamine (GlcNAc) transferase                                   | CCDS14414.1     | chrX_70784541-70784541_G_A    | 843V>I | Substitution | Nonsynonymous coding | 12% |
| MM18T | OLFM1   | olfactomedin 1                                                                      | CCDS6986.1      | chr9_137967578-137967578_G_A  | 9R>Q   | Substitution | Nonsynonymous coding | 11% |
| MM18T | OLFM1   | olfactomedin 1                                                                      | CCDS6986.1      | chr9_138011778-138011778_G_T  | 386E>D | Substitution | Nonsynonymous coding | 11% |
| MM18T | OLFM4   | olfactomedin 4                                                                      | CCDS9440.1      | chr13_53617275-53617275_G_T   | 202E>D | Substitution | Nonsynonymous coding | 12% |
| MM18T | OLFML2B | olfactomedin-like 2B                                                                | CCDS1236.1      | chr1_161954013-161954013_C_T  | 569V>M | Substitution | Nonsynonymous coding | 13% |
| MM18T | ONECUT2 | one cut homeobox 2                                                                  | CCDS42440.1     | chr18_55103913-55103913_C_T   | 322S>L | Substitution | Nonsynonymous coding | 26% |
| MM18T | OPCML   | opioid binding protein/cell adhesion molecule-like                                  | CCDS8492.1      | chr11_132307161-132307161_C_T | 207D>N | Substitution | Nonsynonymous coding | 14% |
| MM18T | OPRK1   | opioid receptor, kappa 1                                                            | CCDS6152.1      | chr8_54142150-54142150_C_T    | 284V>I | Substitution | Nonsynonymous coding | 12% |
| MM18T | OPRK1   | opioid receptor, kappa 1                                                            | CCDS6152.1      | chr8_54147372-54147372_G_A    | 186S>L | Substitution | Nonsynonymous coding | 12% |
| MM18T | OR10G3  | olfactory receptor, family 10, subfamily G, member 3                                | CCDS32046.1     | chr14_22038169-22038169_C_T   | 236R>H | Substitution | Nonsynonymous coding | 11% |
| MM18T | OR10K1  | olfactory receptor, family 10, subfamily K, member 1                                | CCDS30897.1     | chr1_158435397-158435397_G_A  | 16G>S  | Substitution | Nonsynonymous coding | 11% |
| MM18T | OR10T2  | olfactory receptor, family 10, subfamily T, member 2                                | CCDS30895.1     | chr1_158369018-158369018_G_T  | 80P>H  | Substitution | Nonsynonymous coding | 15% |
| MM18T | OR10W1  | olfactory receptor, family 10, subfamily W, member 1                                | CCDS7968.1      | chr11_58034600-58034600_C_T   | 244G>D | Substitution | Nonsynonymous coding | 12% |
| MM18T | OR11H4  | olfactory receptor, family 11, subfamily H, member 4                                | CCDS32034.1     | chr14_20711417-20711417_C_A   | 156S>Y | Substitution | Nonsynonymous coding | 14% |
| MM18T | OR11H6  | olfactory receptor, family 11, subfamily H, member 6                                | CCDS32033.1     | chr14_20692352-20692352_C_A   | 162L>M | Substitution | Nonsynonymous coding | 18% |
| MM18T | OR12D3  | olfactory receptor, family 12, subfamily D, member 3 [Source:HGNC Symbol;Acc:13963] | CCDS4658.1      | chr6_29342373-29342373_C_T    | 231R>K | Substitution | Nonsynonymous coding | 12% |
| MM18T | OR13C4  | olfactory receptor, family 13, subfamily C, member 4                                | CCDS35088.1     | chr9_107288997-107288997_C_T  | 165R>Q | Substitution | Nonsynonymous coding | 15% |
| MM18T | OR13F1  | olfactory receptor, family 13, subfamily F, member 1                                | CCDS35087.1     | chr9_107266683-107266683_C_A  | 47S>Y  | Substitution | Nonsynonymous coding | 21% |
| MM18T | OR13F1  | olfactory receptor, family 13, subfamily F, member 1                                | CCDS35087.1     | chr9_107266779-107266779_C_A  | 79S>Y  | Substitution | Nonsynonymous coding | 21% |
| MM18T | OR14J1  | olfactory receptor, family 14, subfamily J, member 1                                | CCDS34362.1     | chr6_29274991-29274991_C_A    | 175F>L | Substitution | Nonsynonymous coding | 12% |
| MM18T | OR1C1   | olfactory receptor, family 1, subfamily C, member 1                                 | CCDS41481.1     | chr1_247921255-247921255_T_C  | 152T>A | Substitution | Nonsynonymous coding | 15% |
| MM18T | OR1G1   | olfactory receptor, family 1, subfamily G, member 1                                 | CCDS11020.1     | chr17_3030499-3030499_G_A     | 116A>V | Substitution | Nonsynonymous coding | 17% |
| MM18T | OR1K1   | olfactory receptor, family 1, subfamily K, member 1                                 | CCDS35132.1     | chr9_125562790-125562790_C_T  | 130P>L | Substitution | Nonsynonymous coding | 20% |
| MM18T | OR2AJ1  | olfactory receptor, family 2, subfamily AJ, member 1                                | ENST00000318244 | chr1_248097678-248097678_C_A  | 203A>D | Substitution | Nonsynonymous coding | 11% |
| MM18T | OR2B2   | olfactory receptor, family 2, subfamily B, member 2                                 | CCDS4641.1      | chr6_27879035-27879035_T_G    | 355K>Q | Substitution | Nonsynonymous coding | 13% |
| MM18T | OR2F2   | olfactory receptor, family 2, subfamily F, member 2                                 | CCDS43666.1     | chr7_143632587-143632587_G_T  | 88E>X  | Substitution | Nonsense             | 13% |
| MM18T | OR2T10  | olfactory receptor, family 2, subfamily T, member 10                                | CCDS31121.1     | chr1_248756459-248756459_A_G  | 204V>A | Substitution | Nonsynonymous coding | 11% |

|       |         |                                                                 |                 |                              |        |              |                      |     |
|-------|---------|-----------------------------------------------------------------|-----------------|------------------------------|--------|--------------|----------------------|-----|
| MM18T | OR2W1   | olfactory receptor, family 2, subfamily W, member 1             | CCDS4656.1      | chr6_29012015-29012015_T_C   | 313K>R | Substitution | Nonsynonymous coding | 16% |
| MM18T | OR2W5   | olfactory receptor, family 2, subfamily W, member 5             | NM_001004698    | chr1_247654839-247654839_G_A | 137R>H | Substitution | Nonsynonymous coding | 16% |
| MM18T | OR3A1   | olfactory receptor, family 3, subfamily A, member 1             | CCDS11023.1     | chr17_3195087-3195087_G_A    | 264R>X | Substitution | Nonsense             | 17% |
| MM18T | OR4D6   | olfactory receptor, family 4, subfamily D, member 6             | CCDS31562.1     | chr11_59224917-59224917_C_A  | 162L>M | Substitution | Nonsynonymous coding | 12% |
| MM18T | OR4H12P | olfactory receptor, family 4, subfamily H, member 12 pseudogene | ENST00000316004 | chr14_20228318-20228318_T_   | NA     | Deletion     | Frameshift           | 11% |
| MM18T | OR4K1   | olfactory receptor, family 4, subfamily K, member 1             | CCDS32025.1     | chr14_20404145-20404145_T_A  | 107F>Y | Substitution | Nonsynonymous coding | 11% |
| MM18T | OR4K1   | olfactory receptor, family 4, subfamily K, member 1             | CCDS32025.1     | chr14_20404262-20404262_C_A  | 146S>Y | Substitution | Nonsynonymous coding | 13% |
| MM18T | OR4K1   | olfactory receptor, family 4, subfamily K, member 1             | CCDS32025.1     | chr14_20404416-20404416_T_G  | 197I>M | Substitution | Nonsynonymous coding | 11% |
| MM18T | OR4K14  | olfactory receptor, family 4, subfamily K, member 14            | CCDS32027.1     | chr14_20483291-20483291_C_T  | 21R>Q  | Substitution | Nonsynonymous coding | 12% |
| MM18T | OR4K17  | olfactory receptor, family 4, subfamily K, member 17            | CCDS32030.1     | chr14_20586169-20586169_C_A  | 202P>T | Substitution | Nonsynonymous coding | 14% |
| MM18T | OR51E1  | olfactory receptor, family 51, subfamily E, member 1            | CCDS31358.2     | chr11_4674653-4674653_G_T    | 299K>N | Substitution | Nonsynonymous coding | 11% |
| MM18T | OR51G2  | olfactory receptor, family 51, subfamily G, member 2            | CCDS31365.1     | chr11_4936638-4936638_C_T    | 86V>I  | Substitution | Nonsynonymous coding | 11% |
| MM18T | OR52A5  | olfactory receptor, family 52, subfamily A, member 5            | CCDS31373.1     | chr11_5153442-5153442_G_A    | 144T>I | Substitution | Nonsynonymous coding | 13% |
| MM18T | OR52D1  | olfactory receptor, family 52, subfamily D, member 1            | CCDS31384.1     | chr11_5510853-5510853_G_A    | 306R>Q | Substitution | Nonsynonymous coding | 14% |
| MM18T | OR52E8  | olfactory receptor, family 52, subfamily E, member 8            | CCDS31400.1     | chr11_5878131-5878131_G_A    | 268R>C | Substitution | Nonsynonymous coding | 18% |
| MM18T | OR52M1  | olfactory receptor, family 52, subfamily M, member 1            | CCDS31353.1     | chr11_4566791-4566791_G_A    | 124R>H | Substitution | Nonsynonymous coding | 14% |
| MM18T | OR52N5  | olfactory receptor, family 52, subfamily N, member 5            | CCDS31397.1     | chr11_5799321-5799321_T_C    | 182I>V | Substitution | Nonsynonymous coding | 17% |
| MM18T | OR56A1  | olfactory receptor, family 56, subfamily A, member 1            | CCDS31405.1     | chr11_6048226-6048226_C_A    | 237A>S | Substitution | Nonsynonymous coding | 14% |
| MM18T | OR5D14  | olfactory receptor, family 5, subfamily D, member 14            | CCDS31508.1     | chr11_55563116-55563116_C_A  | 29L>I  | Substitution | Nonsynonymous coding | 11% |
| MM18T | OR5D16  | olfactory receptor, family 5, subfamily D, member 16            | CCDS31512.1     | chr11_55606573-55606573_C_A  | 116L>I | Substitution | Nonsynonymous coding | 11% |
| MM18T | OR5K1   | olfactory receptor, family 5, subfamily K, member 1             | CCDS43115.1     | chr3_98188526-98188526_C_A   | 36L>M  | Substitution | Nonsynonymous coding | 22% |
| MM18T | OR5K1   | olfactory receptor, family 5, subfamily K, member 1             | CCDS43115.1     | chr3_98189267-98189267_C_T   | 283P>S | Substitution | Nonsynonymous coding | 15% |
| MM18T | OR5K3   | olfactory receptor, family 5, subfamily K, member 3             | CCDS33803.1     | chr3_98110153-98110153_C_A   | 215S>Y | Substitution | Nonsynonymous coding | 11% |
| MM18T | OR5K3   | olfactory receptor, family 5, subfamily K, member 3             | CCDS33803.1     | chr3_98110256-98110256_C_A   | 249F>L | Substitution | Nonsynonymous coding | 11% |
| MM18T | OR5M10  | olfactory receptor, family 5, subfamily M, member 10            | NM_001004741    | chr11_56344842-56344842_G_A  | 119A>V | Substitution | Nonsynonymous coding | 15% |
| MM18T | OR6A2   | olfactory receptor, family 6, subfamily A, member 2             | CCDS7772.1      | chr11_6816132-6816132_G_A    | 270L>F | Substitution | Nonsynonymous coding | 14% |
| MM18T | OR6B1   | olfactory receptor, family 6, subfamily B, member 1             | CCDS43667.1     | chr7_143701793-143701793_C_T | 235A>V | Substitution | Nonsynonymous coding | 11% |
| MM18T | OR6B2   | olfactory receptor, family 6, subfamily B, member 2             | CCDS46559.1     | chr2_240969140-240969140_C_A | 236R>I | Substitution | Nonsynonymous coding | 11% |
| MM18T | OR6C4   | olfactory receptor, family 6, subfamily C, member 4             | CCDS31827.1     | chr12_55945508-55945508_C_A  | 166F>L | Substitution | Nonsynonymous coding | 12% |
| MM18T | OR6C6   | olfactory receptor, family 6, subfamily C, member 6             | CCDS31817.1     | chr12_55688427-55688427_G_T  | 197S>Y | Substitution | Nonsynonymous coding | 12% |
| MM18T | OR6C70  | olfactory receptor, family 6, subfamily C, member 70            | CCDS31825.1     | chr12_55863511-55863511_C_T  | 138V>I | Substitution | Nonsynonymous coding | 11% |
| MM18T | OR6C70  | olfactory receptor, family 6, subfamily C, member 70            | CCDS31825.1     | chr12_55863816-55863816_C_T  | 36S>N  | Substitution | Nonsynonymous coding | 11% |

|       |        |                                                           |                 |                               |         |              |                      |     |
|-------|--------|-----------------------------------------------------------|-----------------|-------------------------------|---------|--------------|----------------------|-----|
| MM18T | OR6N1  | olfactory receptor, family 6, subfamily N, member 1       | CCDS30905.1     | chr1_158735956-158735956_G_A  | 173R>C  | Substitution | Nonsynonymous coding | 15% |
| MM18T | OR6V1  | olfactory receptor, family 6, subfamily V, member 1       | CCDS47728.1     | chr7_142749684-142749684_C_A  | 83L>M   | Substitution | Nonsynonymous coding | 12% |
| MM18T | OR6X1  | olfactory receptor, family 6, subfamily X, member 1       | CCDS31695.1     | chr11_123624374-123624374_G_T | 285P>T  | Substitution | Nonsynonymous coding | 13% |
| MM18T | OR7G3  | olfactory receptor, family 7, subfamily G, member 3       | CCDS32899.1     | chr19_9237262-9237262_C_T     | 122R>Q  | Substitution | Nonsynonymous coding | 14% |
| MM18T | OR8D1  | olfactory receptor, family 8, subfamily D, member 1       | CCDS31706.1     | chr11_124180164-124180164_A_G | 167S>P  | Substitution | Nonsynonymous coding | 14% |
| MM18T | OR8I2  | olfactory receptor, family 8, subfamily I, member 2       | CCDS31517.1     | chr11_55861580-55861580_C_T   | 266S>L  | Substitution | Nonsynonymous coding | 12% |
| MM18T | OR8S1  | olfactory receptor, family 8, subfamily S, member 1       | CCDS31789.1     | chr12_48919530-48919530_T_C   | 39I>T   | Substitution | Nonsynonymous coding | 12% |
| MM18T | OR9A4  | olfactory receptor, family 9, subfamily A, member 4       | CCDS43661.1     | chr7_141619127-141619127_T_G  | 151F>C  | Substitution | Nonsynonymous coding | 13% |
| MM18T | OR9K2  | olfactory receptor, family 9, subfamily K, member 2       | CCDS31814.1     | chr12_55523899-55523899_C_A   | 116S>Y  | Substitution | Nonsynonymous coding | 11% |
| MM18T | ORAI1  | ORAI calcium release-activated calcium modulator 1        | NM_032790       | chr12_122079007-122079007_G_A | 124A>T  | Substitution | Nonsynonymous coding | 11% |
| MM18T | ORMDL2 | ORM1-like 2 (S. cerevisiae)                               | CCDS8893.1      | chr12_56212943-56212943_G_A   | 54V>I   | Substitution | Nonsynonymous coding | 10% |
| MM18T | OSBP   | oxysterol binding protein                                 | CCDS7974.1      | chr11_59361107-59361107_G_A   | 550R>X  | Substitution | Nonsense             | 19% |
| MM18T | OSBPL2 | oxysterol binding protein-like 2                          | CCDS13495.1     | chr20_60838677-60838677_C_T   | 63S>L   | Substitution | Nonsynonymous coding | 16% |
| MM18T | OSBPL3 | oxysterol binding protein-like 3                          | CCDS5390.1      | chr7_24905064-24905064_C_A    | 190Q>H  | Substitution | Nonsynonymous coding | 11% |
| MM18T | OSBPL8 | oxysterol binding protein-like 8                          | CCDS31862.1     | chr12_76786428-76786428_C_A   | 288D>Y  | Substitution | Nonsynonymous coding | 11% |
| MM18T | OSBPL8 | oxysterol binding protein-like 8                          | CCDS31862.1     | chr12_76844748-76844748_C_T   | 34E>K   | Substitution | Nonsynonymous coding | 12% |
| MM18T | OSCAR  | osteoclast associated, immunoglobulin-like receptor       | CCDS12876.1     | chr19_54604045-54604045_A_G   | ISV+2>  | Substitution | Splice site donor    | 22% |
| MM18T | OSGIN2 | oxidative stress induced growth inhibitor family member 2 | CCDS47888.1     | chr8_90926894-90926894_G_A    | 150V>I  | Substitution | Nonsynonymous coding | 14% |
| MM18T | OSMR   | oncostatin M receptor                                     | CCDS3928.1      | chr5_38876362-38876362_C_T    | 45R>C   | Substitution | Nonsynonymous coding | 12% |
| MM18T | OSMR   | oncostatin M receptor                                     | CCDS3928.1      | chr5_38917675-38917675_G_T    | 438R>I  | Substitution | Nonsynonymous coding | 15% |
| MM18T | OSR1   | odd-skipped related 1 (Drosophila)                        | CCDS1694.1      | chr2_19553541-19553541_G_A    | 9P>L    | Substitution | Nonsynonymous coding | 14% |
| MM18T | OSR2   | odd-skipped related 2 (Drosophila)                        | CCDS47901.1     | chr8_99961367-99961367_G_A    | 63E>K   | Substitution | Nonsynonymous coding | 14% |
| MM18T | OSTF1  | osteoclast stimulating factor 1                           | CCDS6651.1      | chr9_77761631-77761631_T_G    | 207Y>D  | Substitution | Nonsynonymous coding | 17% |
| MM18T | OTOA   | otoancorin                                                | CCDS10600.2     | chr16_21739565-21739565_G_A   | 674D>N  | Substitution | Nonsynonymous coding | 15% |
| MM18T | OTOF   | otoferlin                                                 | CCDS1725.1      | chr2_26702243-26702243_G_T    | 701F>L  | Substitution | Nonsynonymous coding | 14% |
| MM18T | OTOF   | otoferlin                                                 | CCDS1725.1      | chr2_26702507-26702507_C_T    | 643E>K  | Substitution | Nonsynonymous coding | 14% |
| MM18T | OTOF   | otoferlin                                                 | CCDS1725.1      | chr2_26781385-26781385_G_A    | 19R>W   | Substitution | Nonsynonymous coding | 16% |
| MM18T | OTOG   | otogelin                                                  | ENST00000399391 | chr11_17627637-17627637_G_A   | 1383E>K | Substitution | Nonsynonymous coding | 13% |
| MM18T | OTOL1  | otolin 1                                                  | CCDS46948.1     | chr3_161220957-161220957_G_A  | 221G>R  | Substitution | Nonsynonymous coding | 11% |
| MM18T | OTOP3  | otopetrin 3                                               | CCDS11709.1     | chr17_72943019-72943019_C_T   | 357L>F  | Substitution | Nonsynonymous coding | 13% |
| MM18T | OTUD3  | OTU domain containing 3                                   | CCDS41279.1     | chr1_20234156-20234156_A_C    | 372S>R  | Substitution | Nonsynonymous coding | 10% |
| MM18T | OTUD6A | OTU domain containing 6A                                  | CCDS14395.1     | chrX_69283051-69283051_C_T    | 226S>L  | Substitution | Nonsynonymous coding | 20% |

|       |             |                                                           |                 |                              |        |              |                      |     |
|-------|-------------|-----------------------------------------------------------|-----------------|------------------------------|--------|--------------|----------------------|-----|
| MM18T | OVCH1       | ovochymase 1                                              | NM_183378       | chr12_29624802-29624802_C_T  | 597D>N | Substitution | Nonsynonymous coding | 11% |
| MM18T | OVGP1       | oviductal glycoprotein 1, 120kDa                          | CCDS834.1       | chr1_111962326-111962326_G_A | 309A>V | Substitution | Nonsynonymous coding | 12% |
| MM18T | OXR1        | oxidation resistance 1                                    | CCDS47909.1     | chr8_107722883-107722883_G_A | 553R>Q | Substitution | Nonsynonymous coding | 13% |
| MM18T | OXR1        | oxidation resistance 1                                    | ENST00000442977 | chr8_107749787-107749787_C_A | 578L>I | Substitution | Nonsynonymous coding | 12% |
| MM18T | P2RY1       | purinergic receptor P2Y, G-protein coupled, 1             | CCDS3169.1      | chr3_152553722-152553722_T_G | 51F>V  | Substitution | Nonsynonymous coding | 15% |
| MM18T | P2RY4       | pyrimidinergic receptor P2Y, G-protein coupled, 4         | CCDS14398.1     | chrX_69478416-69478416_C_A   | 353Q>H | Substitution | Nonsynonymous coding | 13% |
| MM18T | PABPC5      | poly(A) binding protein, cytoplasmic 5                    | CCDS14460.1     | chrX_90691207-90691207_G_T   | 211D>Y | Substitution | Nonsynonymous coding | 13% |
| MM18T | PABPC5      | poly(A) binding protein, cytoplasmic 5                    | CCDS14460.1     | chrX_90691369-90691369_G_A   | 265D>N | Substitution | Nonsynonymous coding | 11% |
| MM18T | PACS1       | phosphofurin acidic cluster sorting protein 1             | CCDS8129.1      | chr11_65984011-65984011_A_C  | 276N>H | Substitution | Nonsynonymous coding | 10% |
| MM18T | PACS1       | phosphofurin acidic cluster sorting protein 1             | CCDS8129.1      | chr11_66002792-66002792_C_T  | 709R>W | Substitution | Nonsynonymous coding | 12% |
| MM18T | PACSN2      | protein kinase C and casein kinase substrate in neurons 2 | CCDS43023.1     | chr22_43267449-43267449_C_T  | 459E>K | Substitution | Nonsynonymous coding | 19% |
| MM18T | PADI1       | peptidyl arginine deiminase, type I                       | CCDS178.1       | chr1_17555505-17555505_G_T   | 296M>I | Substitution | Nonsynonymous coding | 14% |
| MM18T | PADI2       | peptidyl arginine deiminase, type II                      | CCDS177.1       | chr1_17397960-17397960_T_C   | 526I>V | Substitution | Nonsynonymous coding | 15% |
| MM18T | PADI2       | peptidyl arginine deiminase, type II                      | CCDS177.1       | chr1_17402308-17402308_G_A   | 441R>W | Substitution | Nonsynonymous coding | 15% |
| MM18T | PADI3       | peptidyl arginine deiminase, type III                     | CCDS179.1       | chr1_17575636-17575636_T_C   | 2S>P   | Substitution | Nonsynonymous coding | 10% |
| MM18T | PADI3       | peptidyl arginine deiminase, type III                     | CCDS179.1       | chr1_17599870-17599870_C_G   | 361H>Q | Substitution | Nonsynonymous coding | 13% |
| MM18T | PADI3       | peptidyl arginine deiminase, type III                     | CCDS179.1       | chr1_17586092-17586092_G_T   | 38E>X  | Substitution | Nonsense             | 13% |
| MM18T | PADI6       | peptidyl arginine deiminase, type VI                      | ENST00000358481 | chr1_17698836-17698836_A_C   | 32E>D  | Substitution | Nonsynonymous coding | 10% |
| MM18T | PADI6       | peptidyl arginine deiminase, type VI                      | ENST00000358481 | chr1_17725310-17725310_G_T   | 606K>N | Substitution | Nonsynonymous coding | 14% |
| MM18T | PAFAH2      | platelet-activating factor acetylhydrolase 2, 40kDa       | CCDS270.1       | chr1_26303174-26303174_G_A   | 253R>W | Substitution | Nonsynonymous coding | 15% |
| MM18T | PAGE1       | P antigen family, member 1 (prostate associated)          | CCDS14327.1     | chrX_49455952-49455952_C_A   | 64Q>H  | Substitution | Nonsynonymous coding | 15% |
| MM18T | PAK1IP1     | PAK1 interacting protein 1                                | CCDS34339.1     | chr6_10709635-10709635_G_T   | 377E>X | Substitution | Nonsense             | 14% |
| MM18T | PAK2        | p21 protein (Cdc42/Rac)-activated kinase 2                | CCDS3321.1      | chr3_196529902-196529902_G_C | 101Q>H | Substitution | Nonsynonymous coding | 12% |
| MM18T | PAK2        | p21 protein (Cdc42/Rac)-activated kinase 2                | CCDS3321.1      | chr3_196554151-196554151_C_T | 479R>X | Substitution | Nonsense             | 18% |
| MM18T | PALB2       | partner and localizer of BRCA2                            | CCDS32406.1     | chr16_23637652-23637652_G_A  | 885P>S | Substitution | Nonsynonymous coding | 19% |
| MM18T | PALLD       | palladin, cytoskeletal associated protein                 | CCDS34098.1     | chr4_169432849-169432849_C_T | 65S>L  | Substitution | Nonsynonymous coding | 12% |
| MM18T | PALM        | paralemmin                                                | CCDS32857.1     | chr19_746408-746408_C_T      | 253A>V | Substitution | Nonsynonymous coding | 12% |
| MM18T | PALM2-AKAP2 | PALM2-AKAP2 readthrough                                   | CCDS35100.1     | chr9_112629834-112629834_C_A | 37L>M  | Substitution | Nonsynonymous coding | 18% |
| MM18T | PAN3        | -                                                         | NM_001168251    | chr13_28713139-28713139_G_T  | 115K>N | Substitution | Nonsynonymous coding | 23% |
| MM18T | PANK2       | pantothenate kinase 2                                     | CCDS13071.2     | chr20_3893223-3893223_G_T    | 452D>Y | Substitution | Nonsynonymous coding | 16% |
| MM18T | PANK4       | pantothenate kinase 4                                     | CCDS42.1        | chr1_2452704-2452704_C_A     | 86E>D  | Substitution | Nonsynonymous coding | 11% |
| MM18T | PANK4       | pantothenate kinase 4                                     | CCDS42.1        | chr1_2453171-2453171_C_T     | 65D>N  | Substitution | Nonsynonymous coding | 17% |

|       |         |                                                                               |                 |                               |         |              |                      |     |
|-------|---------|-------------------------------------------------------------------------------|-----------------|-------------------------------|---------|--------------|----------------------|-----|
| MM18T | PAPOLB  | poly(A) polymerase beta (testis specific)                                     | NM_020144       | chr7_4899668-4899668_C_T      | 592E>K  | Substitution | Nonsynonymous coding | 14% |
| MM18T | PAPPA   | pregnancy-associated plasma protein A, pappalysin 1                           | CCDS6813.1      | chr9_118997777-118997777_G_A  | 865D>N  | Substitution | Nonsynonymous coding | 19% |
| MM18T | PAPPA   | pregnancy-associated plasma protein A, pappalysin 1                           | CCDS6813.1      | chr9_119109317-119109317_G_A  | 1265V>I | Substitution | Nonsynonymous coding | 11% |
| MM18T | PAPPA2  | pappalysin 2                                                                  | CCDS41438.1     | chr1_176664918-176664918_T_C  | 890F>S  | Substitution | Nonsynonymous coding | 12% |
| MM18T | PAPPA2  | pappalysin 2                                                                  | CCDS41438.1     | chr1_176664920-176664920_C_T  | 891R>C  | Substitution | Nonsynonymous coding | 16% |
| MM18T | PAPPA2  | pappalysin 2                                                                  | CCDS41438.1     | chr1_176734957-176734957_A_G  | 1436Y>C | Substitution | Nonsynonymous coding | 11% |
| MM18T | PAPPA2  | pappalysin 2                                                                  | CCDS41438.1     | chr1_176760544-176760544_T_C  | 1649L>P | Substitution | Nonsynonymous coding | 11% |
| MM18T | PARD6A  | par-6 partitioning defective 6 homolog alpha (C. elegans)                     | CCDS10843.1     | chr16_67694998-67694998_G_T   | 19K>N   | Substitution | Nonsynonymous coding | 11% |
| MM18T | PARP10  | poly (ADP-ribose) polymerase family, member 10 [Source:HGNC Symbol;Acc:25895] | CCDS34960.1     | chr8_145057821-145057821_C_T  | 646A>T  | Substitution | Nonsynonymous coding | 14% |
| MM18T | PARP15  | poly (ADP-ribose) polymerase family, member 15                                | CCDS46893.1     | chr3_122329471-122329471_A_G  | 146E>G  | Substitution | Nonsynonymous coding | 12% |
| MM18T | PARP2   | poly (ADP-ribose) polymerase 2                                                | CCDS41910.1     | chr14_20822313-20822313_C_T   | 237R>W  | Substitution | Nonsynonymous coding | 13% |
| MM18T | PARP3   | poly (ADP-ribose) polymerase family, member 3                                 | CCDS46839.1     | chr3_51980218-51980218_C_T    | 386R>W  | Substitution | Nonsynonymous coding | 10% |
| MM18T | PASD1   | PAS domain containing 1                                                       | CCDS35431.1     | chrX_150844588-150844588_G_T  | 765E>D  | Substitution | Nonsynonymous coding | 15% |
| MM18T | PASK    | PAS domain containing serine/threonine kinase                                 | CCDS2545.1      | chr2_242046782-242046782_C_T  | 1267R>Q | Substitution | Nonsynonymous coding | 11% |
| MM18T | PASK    | PAS domain containing serine/threonine kinase                                 | CCDS2545.1      | chr2_242066289-242066289_C_T  | 681E>K  | Substitution | Nonsynonymous coding | 12% |
| MM18T | PASK    | PAS domain containing serine/threonine kinase                                 | CCDS2545.1      | chr2_242066688-242066688_C_A  | 548D>Y  | Substitution | Nonsynonymous coding | 12% |
| MM18T | PATZ1   | POZ (BTB) and AT hook containing zinc finger 1                                | CCDS13894.1     | chr22_31740402-31740402_T_C   | 396D>G  | Substitution | Nonsynonymous coding | 21% |
| MM18T | PAX1    | paired box 1                                                                  | CCDS13146.2     | chr20_21687309-21687309_A_G   | 174T>A  | Substitution | Nonsynonymous coding | 24% |
| MM18T | PAX2    | paired box 2                                                                  | CCDS7499.1      | chr10_102584417-102584417_C_T | 311A>V  | Substitution | Nonsynonymous coding | 15% |
| MM18T | PAX3    | paired box 3                                                                  | CCDS2448.1      | chr2_223161728-223161728_C_T  | 97R>H   | Substitution | Nonsynonymous coding | 12% |
| MM18T | PAX3    | paired box 3                                                                  | CCDS2448.1      | chr2_223161771-223161771_C_T  | 83V>I   | Substitution | Nonsynonymous coding | 13% |
| MM18T | PAX4    | paired box 4                                                                  | CCDS5797.1      | chr7_127253857-127253857_C_T  | 164R>Q  | Substitution | Nonsynonymous coding | 14% |
| MM18T | PAXIP1  | PAX interacting (with transcription-activation domain) protein 1              | CCDS47753.1     | chr7_154746126-154746126_T_C  | 887Y>C  | Substitution | Nonsynonymous coding | 18% |
| MM18T | PBXIP1  | pre-B-cell leukemia homeobox interacting protein 1                            | CCDS1074.1      | chr1_154918762-154918762_T_G  | 463K>T  | Substitution | Nonsynonymous coding | 16% |
| MM18T | PCBP3   | poly(rC) binding protein 3                                                    | CCDS42974.2     | chr21_47321017-47321017_A_C   | 110K>T  | Substitution | Nonsynonymous coding | 18% |
| MM18T | PCBP3   | poly(rC) binding protein 3                                                    | CCDS42974.2     | chr21_47349901-47349901_C_T   | 263A>V  | Substitution | Nonsynonymous coding | 14% |
| MM18T | PCDH11X | protocadherin 11 X-linked                                                     | ENST00000361655 | chrX_91090498-91090498_C_A    | 28P>T   | Substitution | Nonsynonymous coding | 11% |
| MM18T | PCDH12  | protocadherin 12                                                              | CCDS4269.1      | chr5_141337367-141337367_T_C  | 17Y>C   | Substitution | Nonsynonymous coding | 13% |
| MM18T | PCDH15  | protocadherin-related 15                                                      | ENST00000373965 | chr10_55566796-55566796_C_T   | 1533R>H | Substitution | Nonsynonymous coding | 13% |
| MM18T | PCDH15  | protocadherin-related 15                                                      | CCDS44404.1     | chr10_55587172-55587172_C_A   | 1450E>X | Substitution | Nonsense             | 20% |
| MM18T | PCDH17  | protocadherin 17                                                              | CCDS13986.1     | chr13_58206957-58206957_G_A   | 93E>K   | Substitution | Nonsynonymous coding | 19% |
| MM18T | PCDH17  | protocadherin 17                                                              | CCDS13986.1     | chr13_58207129-58207129_G_A   | 150R>H  | Substitution | Nonsynonymous coding | 19% |

|       |          |                                     |                 |                              |         |              |                      |     |
|-------|----------|-------------------------------------|-----------------|------------------------------|---------|--------------|----------------------|-----|
| MM18T | PCDH17   | protocadherin 17                    | CCDS31986.1     | chr13_58299252-58299252_G_T  | 1102D>Y | Substitution | Nonsynonymous coding | 13% |
| MM18T | PCDH18   | protocadherin 18                    | CCDS34064.1     | chr4_138449782-138449782_C_A | 864D>Y  | Substitution | Nonsynonymous coding | 13% |
| MM18T | PCDH19   | protocadherin 19                    | CCDS43976.1     | chrX_99551604-99551604_C_T   | 993D>N  | Substitution | Nonsynonymous coding | 14% |
| MM18T | PCDH19   | protocadherin 19                    | CCDS43976.1     | chrX_99596918-99596918_G_T   | 897S>Y  | Substitution | Nonsynonymous coding | 12% |
| MM18T | PCDH19   | protocadherin 19                    | CCDS43976.1     | chrX_99663442-99663442_C_T   | 52A>T   | Substitution | Nonsynonymous coding | 25% |
| MM18T | PCDH20   | protocadherin 20                    | CCDS9442.2      | chr13_61985628-61985628_T_G  | 868K>N  | Substitution | Nonsynonymous coding | 11% |
| MM18T | PCDH20   | protocadherin 20                    | CCDS9442.2      | chr13_61986926-61986926_C_A  | 436D>Y  | Substitution | Nonsynonymous coding | 14% |
| MM18T | PCDH20   | protocadherin 20                    | CCDS9442.2      | chr13_61987616-61987616_C_T  | 206A>T  | Substitution | Nonsynonymous coding | 10% |
| MM18T | PCDH8    | protocadherin 8                     | CCDS9438.1      | chr13_53421376-53421376_G_A  | 399S>L  | Substitution | Nonsynonymous coding | 12% |
| MM18T | PCDH9    | protocadherin 9                     | CCDS9444.1      | chr13_67800543-67800543_G_T  | 677S>Y  | Substitution | Nonsynonymous coding | 12% |
| MM18T | PCDHA12  | protocadherin alpha 12              | CCDS47285.1     | chr5_140255077-140255077_G_T | 7R>I    | Substitution | Nonsynonymous coding | 11% |
| MM18T | PCDHA6   | protocadherin alpha 6               | ENST00000409494 | chr5_140389787-140389787_G_A | 894R>H  | Substitution | Nonsynonymous coding | 11% |
| MM18T | PCDHA6   | protocadherin alpha 6               | CCDS4240.1      | chr5_140262460-140262460_G_T | 203E>X  | Substitution | Nonsense             | 12% |
| MM18T | PCDHA6   | protocadherin alpha 6               | CCDS4242.1      | chr5_140362123-140362123_G_A | 896W>X  | Substitution | Nonsense             | 12% |
| MM18T | PCDHB1   | protocadherin beta 1                | CCDS4243.1      | chr5_140431783-140431783_C_T | 243S>L  | Substitution | Nonsynonymous coding | 17% |
| MM18T | PCDHB1   | protocadherin beta 1                | CCDS4243.1      | chr5_140431806-140431806_G_A | 251V>I  | Substitution | Nonsynonymous coding | 10% |
| MM18T | PCDHB10  | protocadherin beta 10               | CCDS4252.1      | chr5_140572516-140572516_C_T | 131P>S  | Substitution | Nonsynonymous coding | 13% |
| MM18T | PCDHB4   | protocadherin beta 4                | CCDS4246.1      | chr5_140502688-140502688_C_T | 370R>X  | Substitution | Nonsense             | 13% |
| MM18T | PCDHB5   | protocadherin beta 5                | CCDS4247.1      | chr5_140515200-140515200_C_T | 62R>W   | Substitution | Nonsynonymous coding | 19% |
| MM18T | PCDHB6   | protocadherin beta 6                | CCDS4248.1      | chr5_140530476-140530476_C_T | 213A>V  | Substitution | Nonsynonymous coding | 17% |
| MM18T | PCDHGA11 | protocadherin gamma subfamily A, 11 | CCDS47294.1     | chr5_140800867-140800867_C_T | 25R>W   | Substitution | Nonsynonymous coding | 15% |
| MM18T | PCDHGA2  | protocadherin gamma subfamily A, 2  | CCDS47289.1     | chr5_140720958-140720958_C_A | 807S>Y  | Substitution | Nonsynonymous coding | 17% |
| MM18T | PCDHGA2  | protocadherin gamma subfamily A, 2  | CCDS4262.1      | chr5_140865128-140865128_G_A | 130A>T  | Substitution | Nonsynonymous coding | 11% |
| MM18T | PCDHGA2  | protocadherin gamma subfamily A, 2  | CCDS4260.1      | chr5_140810339-140810339_C_T | 5R>X    | Substitution | Nonsense             | 12% |
| MM18T | PCDHGA4  | protocadherin gamma subfamily A, 4  | NM_018917       | chr5_140735563-140735563_G_T | 266A>S  | Substitution | Nonsynonymous coding | 13% |
| MM18T | PCDHGA4  | protocadherin gamma subfamily A, 4  | NM_018917       | chr5_140736323-140736323_C_T | 519S>F  | Substitution | Nonsynonymous coding | 11% |
| MM18T | PCDHGA5  | protocadherin gamma subfamily A, 5  | NM_018918       | chr5_140744008-140744008_G_T | 37E>D   | Substitution | Nonsynonymous coding | 22% |
| MM18T | PCDHGA5  | protocadherin gamma subfamily A, 5  | NM_018918       | chr5_140744742-140744742_G_A | 282R>H  | Substitution | Nonsynonymous coding | 15% |
| MM18T | PCDHGA5  | protocadherin gamma subfamily A, 5  | NM_018918       | chr5_140745315-140745315_C_A | 473S>Y  | Substitution | Nonsynonymous coding | 13% |
| MM18T | PCDHGA6  | protocadherin gamma subfamily A, 6  | NM_018919       | chr5_140754102-140754102_G_A | 151R>H  | Substitution | Nonsynonymous coding | 17% |
| MM18T | PCDHGA6  | protocadherin gamma subfamily A, 6  | NM_018919       | chr5_140754898-140754898_C_A | 416F>L  | Substitution | Nonsynonymous coding | 12% |
| MM18T | PCDHGA6  | protocadherin gamma subfamily A, 6  | NM_032086       | chr5_140756083-140756083_C_A | 811F>L  | Substitution | Nonsynonymous coding | 12% |

|       |         |                                                                             |             |                               |         |              |                      |     |
|-------|---------|-----------------------------------------------------------------------------|-------------|-------------------------------|---------|--------------|----------------------|-----|
| MM18T | PCDHGA7 | protocadherin gamma subfamily A, 7                                          | NM_018920   | chr5_140763805-140763805_G_A  | 447D>N  | Substitution | Nonsynonymous coding | 12% |
| MM18T | PCDHGA8 | protocadherin gamma subfamily A, 8                                          | CCDS47291.1 | chr5_140774505-140774505_G_A  | 709A>T  | Substitution | Nonsynonymous coding | 17% |
| MM18T | PCDHGA9 | protocadherin gamma subfamily A, 9                                          | NM_018921   | chr5_140782818-140782818_C_T  | 100P>L  | Substitution | Nonsynonymous coding | 17% |
| MM18T | PCDHGB1 | protocadherin gamma subfamily B, 1                                          | NM_018922   | chr5_140730605-140730605_C_T  | 260R>W  | Substitution | Nonsynonymous coding | 14% |
| MM18T | PCED1B  | PC-esterase domain containing 1B                                            | CCDS8752.1  | chr12_47629099-47629099_G_A   | 85D>N   | Substitution | Nonsynonymous coding | 12% |
| MM18T | PCF11   | PCF11, cleavage and polyadenylation factor subunit, homolog (S. cerevisiae) | CCDS44689.1 | chr11_82879713-82879713_G_A   | 779R>Q  | Substitution | Nonsynonymous coding | 10% |
| MM18T | PCGF5   | polycomb group ring finger 5                                                | CCDS7413.1  | chr10_92982725-92982725_G_A   | 33E>K   | Substitution | Nonsynonymous coding | 19% |
| MM18T | PCGF6   | polycomb group ring finger 6                                                | CCDS31275.1 | chr10_105063690-105063690_A_C | 342L>R  | Substitution | Nonsynonymous coding | 11% |
| MM18T | PCK1    | phosphoenolpyruvate carboxykinase 1 (soluble)                               | CCDS13460.1 | chr20_56140624-56140624_G_A   | 545D>N  | Substitution | Nonsynonymous coding | 14% |
| MM18T | PCK1    | phosphoenolpyruvate carboxykinase 1 (soluble)                               | CCDS13460.1 | chr20_56140798-56140798_G_A   | 603D>N  | Substitution | Nonsynonymous coding | 15% |
| MM18T | PCLO    | piccolo presynaptic cytomatrix protein                                      | CCDS47630.1 | chr7_82579967-82579967_G_A    | 3313R>W | Substitution | Nonsynonymous coding | 12% |
| MM18T | PCLO    | piccolo presynaptic cytomatrix protein                                      | CCDS47630.1 | chr7_82582306-82582306_C_A    | 2655A>S | Substitution | Nonsynonymous coding | 12% |
| MM18T | PCLO    | piccolo presynaptic cytomatrix protein                                      | CCDS47630.1 | chr7_82582398-82582398_G_T    | 2624P>H | Substitution | Nonsynonymous coding | 13% |
| MM18T | PCLO    | piccolo presynaptic cytomatrix protein                                      | CCDS47630.1 | chr7_82585440-82585440_C_T    | 1610R>Q | Substitution | Nonsynonymous coding | 12% |
| MM18T | PCM1    | pericentriolar material 1                                                   | CCDS47812.1 | chr8_17829966-17829966_G_T    | 1238S>I | Substitution | Nonsynonymous coding | 20% |
| MM18T | PCNT    | pericentrin                                                                 | CCDS33592.1 | chr21_47821491-47821491_G_T   | 1606Q>H | Substitution | Nonsynonymous coding | 12% |
| MM18T | PCNX    | pecanex homolog (Drosophila)                                                | CCDS9806.1  | chr14_71500666-71500666_G_T   | 1229K>N | Substitution | Nonsynonymous coding | 13% |
| MM18T | PCNXL2  | pecanex-like 2 (Drosophila)                                                 | CCDS44335.1 | chr1_233122034-233122034_G_A  | 2015A>V | Substitution | Nonsynonymous coding | 14% |
| MM18T | PCOLCE  | procollagen C-endopeptidase enhancer                                        | CCDS5700.1  | chr7_100205352-100205352_C_A  | 369L>M  | Substitution | Nonsynonymous coding | 21% |
| MM18T | PCP4    | Purkinje cell protein 4                                                     | CCDS33563.1 | chr21_41301018-41301018_G_T   | 57K>N   | Substitution | Nonsynonymous coding | 10% |
| MM18T | PCSK1   | proprotein convertase subtilisin/kexin type 1                               | CCDS4081.1  | chr5_95729053-95729053_C_A    | 638E>D  | Substitution | Nonsynonymous coding | 23% |
| MM18T | PCSK1   | proprotein convertase subtilisin/kexin type 1                               | CCDS4081.1  | chr5_95728931-95728931_G_T    | 679S>X  | Substitution | Nonsense             | 12% |
| MM18T | PCYOX1  | prenylcysteine oxidase 1                                                    | CCDS1902.1  | chr2_70486544-70486544_G_T    | 55Q>H   | Substitution | Nonsynonymous coding | 10% |
| MM18T | PCYOX1  | prenylcysteine oxidase 1                                                    | CCDS1902.1  | chr2_70502186-70502186_G_A    | 197R>Q  | Substitution | Nonsynonymous coding | 11% |
| MM18T | PDCD4   | programmed cell death 4 (neoplastic transformation inhibitor)               | CCDS7567.1  | chr10_112657794-112657794_A_G | 453K>R  | Substitution | Nonsynonymous coding | 13% |
| MM18T | PDCL2   | phosducin-like 2                                                            | CCDS47059.1 | chr4_56428669-56428669_T_C    | 158D>G  | Substitution | Nonsynonymous coding | 14% |
| MM18T | PDE11A  | phosphodiesterase 11A                                                       | CCDS33334.1 | chr2_178534269-178534269_G_T  | 838F>L  | Substitution | Nonsynonymous coding | 12% |
| MM18T | PDE12   | phosphodiesterase 12                                                        | CCDS33772.1 | chr3_57545300-57545300_C_T    | 467R>C  | Substitution | Nonsynonymous coding | 14% |
| MM18T | PDE1A   | phosphodiesterase 1A, calmodulin-dependent                                  | CCDS2285.1  | chr2_183387091-183387091_C_T  | 5A>T    | Substitution | Nonsynonymous coding | 15% |
| MM18T | PDE4A   | phosphodiesterase 4A, cAMP-specific                                         | CCDS45961.1 | chr19_10574601-10574601_G_A   | 626E>K  | Substitution | Nonsynonymous coding | 11% |
| MM18T | PDE4B   | phosphodiesterase 4B, cAMP-specific                                         | CCDS30742.1 | chr1_66458705-66458705_G_T    | 39R>I   | Substitution | Nonsynonymous coding | 13% |
| MM18T | PDE4B   | phosphodiesterase 4B, cAMP-specific                                         | CCDS30742.1 | chr1_66458792-66458792_G_A    | 68R>Q   | Substitution | Nonsynonymous coding | 17% |

|       |        |                                                                    |              |                               |         |              |                      |     |
|-------|--------|--------------------------------------------------------------------|--------------|-------------------------------|---------|--------------|----------------------|-----|
| MM18T | PDE5A  | phosphodiesterase 5A, cGMP-specific                                | CCDS3713.1   | chr4_120481514-120481514_G_T  | 379S>Y  | Substitution | Nonsynonymous coding | 12% |
| MM18T | PDE8B  | phosphodiesterase 8B                                               | CCDS4037.1   | chr5_76624825-76624825_C_T    | 198S>L  | Substitution | Nonsynonymous coding | 13% |
| MM18T | PDE8B  | phosphodiesterase 8B                                               | CCDS4037.1   | chr5_76649174-76649174_A_T    | 370K>N  | Substitution | Nonsynonymous coding | 14% |
| MM18T | PDGFD  | platelet derived growth factor D                                   | CCDS41703.1  | chr11_103814289-103814289_T_G | 221E>D  | Substitution | Nonsynonymous coding | 12% |
| MM18T | PDGFRA | platelet-derived growth factor receptor, alpha polypeptide         | CCDS3495.1   | chr4_55161380-55161380_G_A    | 1071D>N | Substitution | Nonsynonymous coding | 15% |
| MM18T | PDHA2  | pyruvate dehydrogenase (lipoamide) alpha 2                         | CCDS3644.1   | chr4_96761769-96761769_G_T    | 156K>N  | Substitution | Nonsynonymous coding | 14% |
| MM18T | PDIA2  | protein disulfide isomerase family A, member 2                     | CCDS42089.1  | chr16_334695-334695_G_A       | 148R>Q  | Substitution | Nonsynonymous coding | 23% |
| MM18T | PDIK1L | PDLIM1 interacting kinase 1 like                                   | CCDS274.1    | chr1_26441059-26441059_G_A    | 87G>D   | Substitution | Nonsynonymous coding | 14% |
| MM18T | PKD2   | pyruvate dehydrogenase kinase, isozyme 2                           | CCDS11559.1  | chr17_48187345-48187345_C_T   | 370R>C  | Substitution | Nonsynonymous coding | 15% |
| MM18T | PDS5B  | PDS5, regulator of cohesion maintenance, homolog B (S. cerevisiae) | CCDS41878.1  | chr13_33226062-33226062_G_A   | 77R>H   | Substitution | Nonsynonymous coding | 16% |
| MM18T | PDS5B  | PDS5, regulator of cohesion maintenance, homolog B (S. cerevisiae) | CCDS41878.1  | chr13_33327602-33327602_C_A   | 957H>N  | Substitution | Nonsynonymous coding | 15% |
| MM18T | PDX1   | pancreatic and duodenal homeobox 1                                 | CCDS9327.1   | chr13_28494285-28494285_G_A   | 4E>K    | Substitution | Nonsynonymous coding | 11% |
| MM18T | PDZD11 | PDZ domain containing 11                                           | CCDS14400.1  | chrX_69506957-69506957_C_T    | 133R>H  | Substitution | Nonsynonymous coding | 11% |
| MM18T | PDZD2  | PDZ domain containing 2                                            | CCDS34137.1  | chr5_31799770-31799770_C_T    | 139R>W  | Substitution | Nonsynonymous coding | 14% |
| MM18T | PDZD2  | PDZ domain containing 2                                            | CCDS34137.1  | chr5_32088362-32088362_C_A    | 1603S>Y | Substitution | Nonsynonymous coding | 16% |
| MM18T | PDZD3  | PDZ domain containing 3                                            | CCDS8417.1   | chr11_119059247-119059247_G_A | 335R>H  | Substitution | Nonsynonymous coding | 12% |
| MM18T | PDZD4  | PDZ domain containing 4                                            | CCDS14732.1  | chrX_153069193-153069193_C_T  | 642R>Q  | Substitution | Nonsynonymous coding | 15% |
| MM18T | PDZD4  | PDZ domain containing 4                                            | CCDS14732.1  | chrX_153073947-153073947_C_T  | 55R>H   | Substitution | Nonsynonymous coding | 13% |
| MM18T | PDZRN4 | PDZ domain containing ring finger 4                                | NM_001164595 | chr12_41587902-41587902_C_T   | 252S>L  | Substitution | Nonsynonymous coding | 10% |
| MM18T | PEG3   | paternally expressed 3                                             | CCDS12948.1  | chr19_57325603-57325603_C_T   | 1403E>K | Substitution | Nonsynonymous coding | 12% |
| MM18T | PEG3   | paternally expressed 3                                             | CCDS12948.1  | chr19_57326503-57326503_C_T   | 1103D>N | Substitution | Nonsynonymous coding | 13% |
| MM18T | PEG3   | paternally expressed 3                                             | CCDS12948.1  | chr19_57328083-57328083_G_T   | 576S>Y  | Substitution | Nonsynonymous coding | 16% |
| MM18T | PEL1   | pellino E3 ubiquitin protein ligase 1                              | CCDS1876.1   | chr2_64321940-64321940_G_T    | 385P>T  | Substitution | Nonsynonymous coding | 11% |
| MM18T | PELP1  | proline, glutamate and leucine rich protein 1                      | NM_014389    | chr17_4576545-4576545_C_A     | 615E>D  | Substitution | Nonsynonymous coding | 17% |
| MM18T | PELP1  | proline, glutamate and leucine rich protein 1                      | NM_014389    | chr17_4576613-4576613_G_A     | 593R>C  | Substitution | Nonsynonymous coding | 12% |
| MM18T | PER2   | period circadian clock 2                                           | CCDS2528.1   | chr2_239155064-239155064_T_G  | 1240E>D | Substitution | Nonsynonymous coding | 11% |
| MM18T | PER3   | period circadian clock 3                                           | CCDS89.1     | chr1_7845025-7845025_G_A      | 30E>K   | Substitution | Nonsynonymous coding | 19% |
| MM18T | PER3   | period circadian clock 3                                           | CCDS89.1     | chr1_7854041-7854041_C_T      | 205P>L  | Substitution | Nonsynonymous coding | 13% |
| MM18T | PER3   | period circadian clock 3                                           | CCDS89.1     | chr1_7863154-7863154_C_T      | 306S>L  | Substitution | Nonsynonymous coding | 12% |
| MM18T | PET112 | PET112 homolog (yeast)                                             | CCDS3776.1   | chr4_152594016-152594016_C_A  | 481K>N  | Substitution | Nonsynonymous coding | 10% |
| MM18T | PEX1   | peroxisomal biogenesis factor 1                                    | CCDS5627.1   | chr7_92147523-92147523_C_T    | 135R>Q  | Substitution | Nonsynonymous coding | 12% |
| MM18T | PEX1   | peroxisomal biogenesis factor 1                                    | CCDS5627.1   | chr7_92119027-92119027_C_A    | ISV+1>  | Substitution | Splice site donor    | 10% |



|       |          |                                                         |                 |                              |         |              |                      |     |
|-------|----------|---------------------------------------------------------|-----------------|------------------------------|---------|--------------|----------------------|-----|
| MM18T | PFKFB2   | 6-phosphofructo-2-kinase/fructose-2,6-biphosphatase 2   | CCDS31004.1     | chr1_207243719-207243719_G_A | 396R>H  | Substitution | Nonsynonymous coding | 11% |
| MM18T | PFKL     | phosphofructokinase, liver                              | CCDS33582.1     | chr21_45732935-45732935_G_A  | 168D>N  | Substitution | Nonsynonymous coding | 15% |
| MM18T | PFKL     | phosphofructokinase, liver                              | CCDS33582.1     | chr21_45745850-45745850_G_A  | 666A>T  | Substitution | Nonsynonymous coding | 11% |
| MM18T | PGBD4    | piggyBac transposable element derived 4                 | CCDS10033.1     | chr15_34396350-34396350_C_T  | 540R>C  | Substitution | Nonsynonymous coding | 12% |
| MM18T | PGK1     | phosphoglycerate kinase 1                               | CCDS14438.1     | chrX_77359878-77359878_T_C   | 14V>A   | Substitution | Nonsynonymous coding | 14% |
| MM18T | PGS1     | phosphatidylglycerophosphate synthase 1                 | CCDS42391.1     | chr17_76395531-76395531_G_A  | 205R>Q  | Substitution | Nonsynonymous coding | 11% |
| MM18T | PHACTR2  | phosphatase and actin regulator 2                       | CCDS47493.1     | chr6_144075044-144075044_A_G | 150K>R  | Substitution | Nonsynonymous coding | 14% |
| MM18T | PHC1P1   | polyhomeotic homolog 1 (Drosophila) pseudogene 1        | ENST00000326184 | chr12_55808033-55808033_C_T  | 163R>Q  | Substitution | Nonsynonymous coding | 16% |
| MM18T | PHC3     | polyhomeotic homolog 3 (Drosophila)                     | CCDS46952.1     | chr3_169846544-169846544_C_A | 572Q>H  | Substitution | Nonsynonymous coding | 17% |
| MM18T | PHEX     | phosphate regulating endopeptidase homolog, X-linked    | CCDS14204.1     | chrX_22051182-22051182_G_A   | 20R>Q   | Substitution | Nonsynonymous coding | 16% |
| MM18T | PHEX     | phosphate regulating endopeptidase homolog, X-linked    | CCDS14204.1     | chrX_22151680-22151680_A_G   | 448D>G  | Substitution | Nonsynonymous coding | 12% |
| MM18T | PHF13    | PHD finger protein 13                                   | CCDS85.1        | chr1_6674129-6674129_G_T     | 1M>I    | Substitution | Nonsynonymous coding | 13% |
| MM18T | PHF17    | PHD finger protein 17                                   | CCDS34062.1     | chr4_129764180-129764180_G_A | 42R>Q   | Substitution | Nonsynonymous coding | 15% |
| MM18T | PHF17    | PHD finger protein 17                                   | CCDS34062.1     | chr4_129767621-129767621_G_T | 77R>I   | Substitution | Nonsynonymous coding | 13% |
| MM18T | PHF2     | PHD finger protein 2                                    | CCDS35069.1     | chr9_96420502-96420502_C_T   | 408S>L  | Substitution | Nonsynonymous coding | 19% |
| MM18T | PHF2     | PHD finger protein 2                                    | CCDS35069.1     | chr9_96429522-96429522_G_T   | 783S>I  | Substitution | Nonsynonymous coding | 24% |
| MM18T | PHF20L1  | PHD finger protein 20-like 1                            | CCDS6367.2      | chr8_133844620-133844620_C_A | 629L>I  | Substitution | Nonsynonymous coding | 15% |
| MM18T | PHF20L1  | PHD finger protein 20-like 1                            | CCDS6367.2      | chr8_133844542-133844542_C_T | 603R>X  | Substitution | Nonsense             | 10% |
| MM18T | PHF21B   | PHD finger protein 21B                                  | CCDS14061.1     | chr22_45279048-45279048_G_A  | 505A>V  | Substitution | Nonsynonymous coding | 20% |
| MM18T | PHF23    | PHD finger protein 23                                   | CCDS42250.1     | chr17_7139624-7139624_C_T    | 208D>N  | Substitution | Nonsynonymous coding | 15% |
| MM18T | PHF23    | PHD finger protein 23                                   | CCDS42250.1     | chr17_7140724-7140724_A_G    | 47Y>H   | Substitution | Nonsynonymous coding | 11% |
| MM18T | PHF3     | PHD finger protein 3                                    | CCDS4966.1      | chr6_64423585-64423585_G_T   | 2034R>I | Substitution | Nonsynonymous coding | 14% |
| MM18T | PHF6     | PHD finger protein 6                                    | CCDS14639.1     | chrX_133549137-133549137_G_T | 274R>L  | Substitution | Nonsynonymous coding | 12% |
| MM18T | PHIP     | pleckstrin homology domain interacting protein          | CCDS4987.1      | chr6_79651023-79651023_A_G   | 1618V>A | Substitution | Nonsynonymous coding | 15% |
| MM18T | PHKA1    | phosphorylase kinase, alpha 1 (muscle)                  | CCDS14421.1     | chrX_71813027-71813027_C_T   | 1057R>Q | Substitution | Nonsynonymous coding | 11% |
| MM18T | PHKA2    | phosphorylase kinase, alpha 2 (liver)                   | CCDS14190.1     | chrX_18961874-18961874_C_T   | 224R>H  | Substitution | Nonsynonymous coding | 11% |
| MM18T | PHKA2    | phosphorylase kinase, alpha 2 (liver)                   | CCDS14190.1     | chrX_19002022-19002022_C_T   | 10R>H   | Substitution | Nonsynonymous coding | 15% |
| MM18T | PHKB     | phosphorylase kinase, beta                              | CCDS10729.1     | chr16_47644808-47644808_G_A  | 479V>M  | Substitution | Nonsynonymous coding | 13% |
| MM18T | PHLDB3   | pleckstrin homology-like domain, family B, member 3     | CCDS12621.2     | chr19_43979614-43979614_C_T  | 624R>H  | Substitution | Nonsynonymous coding | 20% |
| MM18T | PHLPP2   | PH domain and leucine rich repeat protein phosphatase 2 | CCDS32479.1     | chr16_71689260-71689260_C_T  | 823R>Q  | Substitution | Nonsynonymous coding | 14% |
| MM18T | PHLPP2   | PH domain and leucine rich repeat protein phosphatase 2 | CCDS32479.1     | chr16_71703256-71703256_A_G  | 517V>A  | Substitution | Nonsynonymous coding | 14% |
| MM18T | PHOSPHO1 | phosphatase, orphan 1                                   | CCDS45726.1     | chr17_47301815-47301815_G_T  | 224F>L  | Substitution | Nonsynonymous coding | 16% |

|       |         |                                                                           |                 |                              |         |              |                      |     |
|-------|---------|---------------------------------------------------------------------------|-----------------|------------------------------|---------|--------------|----------------------|-----|
| MM18T | PHOX2A  | paired-like homeobox 2a                                                   | CCDS8214.1      | chr11_71952169-71952169_C_T  | 128D>N  | Substitution | Nonsynonymous coding | 22% |
| MM18T | PHPT1   | phosphohistidine phosphatase 1                                            | CCDS7009.1      | chr9_139744569-139744569_C_A | 89H>N   | Substitution | Nonsynonymous coding | 12% |
| MM18T | PHTF1   | putative homeodomain transcription factor 1                               | CCDS861.1       | chr1_114281414-114281414_T_A | 37K>I   | Substitution | Nonsynonymous coding | 19% |
| MM18T | PHYHIP  | phytanoyl-CoA 2-hydroxylase interacting protein                           | CCDS43723.1     | chr8_22078982-22078982_C_T   | 293D>N  | Substitution | Nonsynonymous coding | 15% |
| MM18T | PHYHIPL | phytanoyl-CoA 2-hydroxylase interacting protein-like                      | CCDS7254.1      | chr10_61005259-61005259_G_T  | 347E>X  | Substitution | Nonsense             | 10% |
| MM18T | PI15    | peptidase inhibitor 15                                                    | CCDS6218.1      | chr8_75757638-75757638_C_T   | 183R>W  | Substitution | Nonsynonymous coding | 12% |
| MM18T | PI3     | peptidase inhibitor 3, skin-derived                                       | CCDS13344.1     | chr20_43804604-43804604_C_T  | 61A>V   | Substitution | Nonsynonymous coding | 10% |
| MM18T | PI4KB   | phosphatidylinositol 4-kinase, catalytic, beta                            | CCDS5993.1      | chr1_151278757-151278757_C_T | 434R>Q  | Substitution | Nonsynonymous coding | 13% |
| MM18T | PICK1   | protein interacting with PRKCA 1                                          | CCDS13965.1     | chr22_38468535-38468535_C_T  | 203A>V  | Substitution | Nonsynonymous coding | 16% |
| MM18T | PID1    | phosphotyrosine interaction domain containing 1                           | CCDS2471.1      | chr2_229890712-229890712_A_C | 128F>C  | Substitution | Nonsynonymous coding | 11% |
| MM18T | PIEZO1  | piezo-type mechanosensitive ion channel component 1                       | NM_001142864    | chr16_88791877-88791877_T_C  | 1370D>G | Substitution | Nonsynonymous coding | 11% |
| MM18T | PIEZO2  | piezo-type mechanosensitive ion channel component 2                       | NM_022068       | chr18_10773470-10773470_C_T  | 884E>K  | Substitution | Nonsynonymous coding | 15% |
| MM18T | PIF1    | PIF1 5'-to-3' DNA helicase homolog (S. cerevisiae)                        | CCDS10195.2     | chr15_65108835-65108835_G_A  | 602R>C  | Substitution | Nonsynonymous coding | 17% |
| MM18T | PIFO    | primary cilia formation                                                   | CCDS833.1       | chr1_111891222-111891222_T_G | 115L>V  | Substitution | Nonsynonymous coding | 14% |
| MM18T | PIGB    | phosphatidylinositol glycan anchor biosynthesis, class B                  | NM_004855       | chr15_55647560-55647560_G_A  | 532R>Q  | Substitution | Nonsynonymous coding | 15% |
| MM18T | PIGN    | phosphatidylinositol glycan anchor biosynthesis, class N                  | CCDS45879.1     | chr18_59806230-59806230_G_T  | 368L>I  | Substitution | Nonsynonymous coding | 12% |
| MM18T | PIGR    | polymeric immunoglobulin receptor                                         | CCDS1474.1      | chr1_207108042-207108042_C_A | 476E>D  | Substitution | Nonsynonymous coding | 14% |
| MM18T | PIGW    | phosphatidylinositol glycan anchor biosynthesis, class W                  | CCDS11313.1     | chr17_34894227-34894227_C_A  | 426S>Y  | Substitution | Nonsynonymous coding | 11% |
| MM18T | PIGW    | phosphatidylinositol glycan anchor biosynthesis, class W                  | CCDS11313.1     | chr17_34894262-34894262_C_A  | 438L>I  | Substitution | Nonsynonymous coding | 17% |
| MM18T | PIK3C2A | phosphatidylinositol-4-phosphate 3-kinase, catalytic subunit type 2 alpha | CCDS7824.1      | chr11_17190427-17190427_C_A  | 288D>Y  | Substitution | Nonsynonymous coding | 12% |
| MM18T | PIK3C2B | phosphatidylinositol-4-phosphate 3-kinase, catalytic subunit type 2 beta  | CCDS1446.1      | chr1_204426919-204426919_C_A | 550E>D  | Substitution | Nonsynonymous coding | 19% |
| MM18T | PIK3C3  | phosphatidylinositol 3-kinase, catalytic subunit type 3                   | CCDS11920.1     | chr18_39647380-39647380_C_T  | 851S>L  | Substitution | Nonsynonymous coding | 14% |
| MM18T | PIK3CA  | phosphatidylinositol-4,5-bisphosphate 3-kinase, catalytic subunit alpha   | CCDS43171.1     | chr3_178943785-178943785_C_T | 818R>C  | Substitution | Nonsynonymous coding | 9%  |
| MM18T | PIK3CA  | phosphatidylinositol-4,5-bisphosphate 3-kinase, catalytic subunit alpha   | CCDS43171.1     | chr3_178947871-178947871_C_T | 916R>C  | Substitution | Nonsynonymous coding | 6%  |
| MM18T | PIK3CA  | phosphatidylinositol-4,5-bisphosphate 3-kinase, catalytic subunit alpha   | CCDS43171.1     | chr3_178951919-178951919_C_T | 992R>X  | Substitution | Nonsense             | 7%  |
| MM18T | PIK3CB  | phosphatidylinositol-4,5-bisphosphate 3-kinase, catalytic subunit beta    | CCDS3104.1      | chr3_138383915-138383915_C_A | 879D>Y  | Substitution | Nonsynonymous coding | 21% |
| MM18T | PIK3CB  | phosphatidylinositol-4,5-bisphosphate 3-kinase, catalytic subunit beta    | CCDS3104.1      | chr3_138417862-138417862_T_G | 553N>H  | Substitution | Nonsynonymous coding | 11% |
| MM18T | PIK3CD  | phosphatidylinositol-4,5-bisphosphate 3-kinase, catalytic subunit delta   | CCDS104.1       | chr1_9780685-9780685_G_A     | 496R>Q  | Substitution | Nonsynonymous coding | 19% |
| MM18T | PIK3CG  | phosphatidylinositol-4,5-bisphosphate 3-kinase, catalytic subunit gamma   | CCDS5739.1      | chr7_106509078-106509078_G_A | 358D>N  | Substitution | Nonsynonymous coding | 15% |
| MM18T | PIK3R2  | phosphoinositide-3-kinase, regulatory subunit 2 (beta)                    | CCDS12371.1     | chr19_18271337-18271337_C_A  | 127L>I  | Substitution | Nonsynonymous coding | 10% |
| MM18T | PIK3R4  | phosphoinositide-3-kinase, regulatory subunit 4                           | CCDS3067.1      | chr3_130463345-130463345_C_A | 240D>Y  | Substitution | Nonsynonymous coding | 11% |
| MM18T | PIK3R6  | phosphoinositide-3-kinase, regulatory subunit 6                           | ENST00000311434 | chr17_8726313-8726313_C_A    | 573D>Y  | Substitution | Nonsynonymous coding | 10% |

|       |         |                                                                                       |                 |                               |         |              |                      |     |
|-------|---------|---------------------------------------------------------------------------------------|-----------------|-------------------------------|---------|--------------|----------------------|-----|
| MM18T | PIK3R6  | phosphoinositide-3-kinase, regulatory subunit 6                                       | ENST00000311434 | chr17_8732266-8732266_G_A     | 311R>C  | Substitution | Nonsynonymous coding | 15% |
| MM18T | PIK3R6  | phosphoinositide-3-kinase, regulatory subunit 6                                       | ENST00000311434 | chr17_8736352-8736352_C_T     | 219R>H  | Substitution | Nonsynonymous coding | 18% |
| MM18T | PIM1    | pim-1 oncogene                                                                        | CCDS4830.1      | chr6_37139167-37139167_G_T    | 169K>N  | Substitution | Nonsynonymous coding | 16% |
| MM18T | PIP4K2C | phosphatidylinositol-5-phosphate 4-kinase, type II, gamma                             | CCDS8946.1      | chr12_57994679-57994679_C_T   | 300A>V  | Substitution | Nonsynonymous coding | 10% |
| MM18T | PIPOX   | pipecolic acid oxidase                                                                | CCDS11248.1     | chr17_27382198-27382198_C_A   | 309L>M  | Substitution | Nonsynonymous coding | 14% |
| MM18T | PIRT    | phosphoinositide-interacting regulator of transient receptor potential channels       | CCDS45614.1     | chr17_10728916-10728916_G_T   | 16S>Y   | Substitution | Nonsynonymous coding | 12% |
| MM18T | PITPNA  | phosphatidylinositol transfer protein, alpha                                          | CCDS45563.1     | chr17_1424915-1424915_C_A     | 265G>X  | Substitution | Nonsense             | 19% |
| MM18T | PITPNC1 | phosphatidylinositol transfer protein, cytoplasmic 1                                  | NM_012417       | chr17_65548415-65548415_T_G   | 80F>L   | Substitution | Nonsynonymous coding | 13% |
| MM18T | PITPNM1 | phosphatidylinositol transfer protein, membrane-associated 1                          | CCDS31620.1     | chr11_67266170-67266170_C_T   | 461E>K  | Substitution | Nonsynonymous coding | 16% |
| MM18T | PITPNM2 | phosphatidylinositol transfer protein, membrane-associated 2                          | CCDS9242.1      | chr12_123498371-123498371_G_A | ISV+4>  | Substitution | Splice site donor    | 12% |
| MM18T | PITX2   | paired-like homeodomain 2                                                             | CCDS3694.1      | chr4_111542364-111542364_C_T  | 123E>K  | Substitution | Nonsynonymous coding | 18% |
| MM18T | PITX3   | paired-like homeodomain 3                                                             | CCDS7532.1      | chr10_103990283-103990283_T_G | 299E>D  | Substitution | Nonsynonymous coding | 13% |
| MM18T | PIWIL1  | piwi-like 1 (Drosophila)                                                              | CCDS9268.1      | chr12_130830421-130830421_C_T | 105T>I  | Substitution | Nonsynonymous coding | 13% |
| MM18T | PIWIL1  | piwi-like 1 (Drosophila)                                                              | CCDS9268.1      | chr12_130833930-130833930_A_C | 294K>T  | Substitution | Nonsynonymous coding | 16% |
| MM18T | PIWIL1  | piwi-like 1 (Drosophila)                                                              | CCDS9268.1      | chr12_130839459-130839459_T_G | 400F>V  | Substitution | Nonsynonymous coding | 18% |
| MM18T | PIWIL1  | piwi-like 1 (Drosophila)                                                              | CCDS9268.1      | chr12_130856111-130856111_C_A | 852L>M  | Substitution | Nonsynonymous coding | 11% |
| MM18T | PIWIL4  | piwi-like 4 (Drosophila)                                                              | CCDS31656.1     | chr11_94335001-94335001_G_A   | 474R>Q  | Substitution | Nonsynonymous coding | 13% |
| MM18T | PJA2    | praja ring finger 2, E3 ubiquitin protein ligase                                      | CCDS4099.1      | chr5_108673017-108673017_G_A  | 681A>V  | Substitution | Nonsynonymous coding | 14% |
| MM18T | PJA2    | praja ring finger 2, E3 ubiquitin protein ligase                                      | CCDS4099.1      | chr5_108714230-108714230_T_G  | 320K>Q  | Substitution | Nonsynonymous coding | 16% |
| MM18T | PKD1L1  | polycystic kidney disease 1 like 1                                                    | CCDS34633.1     | chr7_47876601-47876601_G_A    | 1954T>M | Substitution | Nonsynonymous coding | 17% |
| MM18T | PKD1L1  | polycystic kidney disease 1 like 1                                                    | CCDS34633.1     | chr7_47879114-47879114_G_A    | 1900S>F | Substitution | Nonsynonymous coding | 16% |
| MM18T | PKD1L1  | polycystic kidney disease 1 like 1                                                    | CCDS34633.1     | chr7_47917226-47917226_G_A    | 1175S>L | Substitution | Nonsynonymous coding | 10% |
| MM18T | PKD1L1  | polycystic kidney disease 1 like 1                                                    | CCDS34633.1     | chr7_47925578-47925578_G_T    | 971L>M  | Substitution | Nonsynonymous coding | 12% |
| MM18T | PKDREJ  | polycystic kidney disease (polycystin) and REJ homolog (sperm receptor for egg jelly) | CCDS14073.1     | chr22_46655593-46655593_T_G   | 1209E>D | Substitution | Nonsynonymous coding | 11% |
| MM18T | PKHD1   | polycystic kidney and hepatic disease 1 (autosomal recessive)                         | CCDS4935.1      | chr6_51491842-51491842_C_T    | 3913R>H | Substitution | Nonsynonymous coding | 12% |
| MM18T | PKHD1   | polycystic kidney and hepatic disease 1 (autosomal recessive)                         | CCDS4935.1      | chr6_51524505-51524505_G_T    | 3473F>L | Substitution | Nonsynonymous coding | 12% |
| MM18T | PKHD1   | polycystic kidney and hepatic disease 1 (autosomal recessive)                         | CCDS4935.1      | chr6_51618124-51618124_C_T    | 2942R>Q | Substitution | Nonsynonymous coding | 14% |
| MM18T | PKHD1L1 | polycystic kidney and hepatic disease 1 (autosomal recessive)-like 1                  | CCDS47911.1     | chr8_110523131-110523131_C_T  | 3841R>X | Substitution | Nonsense             | 15% |
| MM18T | PKN3    | protein kinase N3                                                                     | CCDS6908.1      | chr9_131476497-131476497_C_T  | 445S>L  | Substitution | Nonsynonymous coding | 10% |
| MM18T | PLA1A   | phospholipase A1 member A                                                             | CCDS2991.1      | chr3_119336991-119336991_C_A  | 294L>M  | Substitution | Nonsynonymous coding | 14% |
| MM18T | PLA2G4A | phospholipase A2, group IVA (cytosolic, calcium-dependent)                            | CCDS1372.1      | chr1_186908283-186908283_G_A  | 280W>X  | Substitution | Nonsense             | 11% |
| MM18T | PLA2G4C | phospholipase A2, group IVC (cytosolic, calcium-independent)                          | CCDS12710.1     | chr19_48565281-48565281_C_T   | 411D>N  | Substitution | Nonsynonymous coding | 11% |

|       |         |                                                                                            |                 |                               |         |              |                      |     |
|-------|---------|--------------------------------------------------------------------------------------------|-----------------|-------------------------------|---------|--------------|----------------------|-----|
| MM18T | PLA2G4C | phospholipase A2, group IVC (cytosolic, calcium-independent)                               | CCDS12710.1     | chr19_48578033-48578033_C_T   | 333E>K  | Substitution | Nonsynonymous coding | 13% |
| MM18T | PLA2G4C | phospholipase A2, group IVC (cytosolic, calcium-independent)                               | CCDS12710.1     | chr19_48603052-48603052_C_T   | 108R>Q  | Substitution | Nonsynonymous coding | 13% |
| MM18T | PLA2G4D | phospholipase A2, group IVD (cytosolic)                                                    | CCDS32203.1     | chr15_42360962-42360962_G_A   | 803A>V  | Substitution | Nonsynonymous coding | 19% |
| MM18T | PLA2G4F | phospholipase A2, group IVF                                                                | CCDS32204.1     | chr15_42439525-42439525_T_C   | 406R>G  | Substitution | Nonsynonymous coding | 16% |
| MM18T | PLA2R1  | phospholipase A2 receptor 1, 180kDa                                                        | CCDS33309.1     | chr2_160807892-160807892_G_A  | 1167R>W | Substitution | Nonsynonymous coding | 13% |
| MM18T | PLAC1   | placenta-specific 1                                                                        | CCDS14642.1     | chrX_133700351-133700351_G_A  | 121S>F  | Substitution | Nonsynonymous coding | 12% |
| MM18T | PLAG1   | pleiomorphic adenoma gene 1                                                                | CCDS6165.1      | chr8_57079508-57079508_A_C    | 266L>R  | Substitution | Nonsynonymous coding | 15% |
| MM18T | PLAGL1  | pleiomorphic adenoma gene-like 1                                                           | CCDS5202.1      | chr6_144262561-144262561_T_G  | 464*>Y  | Substitution | Nonsynonymous coding | 15% |
| MM18T | PLAT    | plasminogen activator, tissue                                                              | CCDS6126.1      | chr8_42033531-42033531_G_A    | 557R>C  | Substitution | Nonsynonymous coding | 15% |
| MM18T | PLB1    | phospholipase B1                                                                           | CCDS33168.1     | chr2_28808689-28808689_G_A    | 599E>K  | Substitution | Nonsynonymous coding | 12% |
| MM18T | PLB1    | phospholipase B1                                                                           | CCDS33168.1     | chr2_28843187-28843187_G_A    | 1124G>E | Substitution | Nonsynonymous coding | 13% |
| MM18T | PLBD2   | phospholipase B domain containing 2                                                        | CCDS9168.1      | chr12_113812768-113812768_G_A | 272R>H  | Substitution | Nonsynonymous coding | 14% |
| MM18T | PLCB1   | phospholipase C, beta 1 (phosphoinositide-specific)                                        | CCDS13102.1     | chr20_8705322-8705322_C_A     | 534A>D  | Substitution | Nonsynonymous coding | 17% |
| MM18T | PLCB2   | phospholipase C, beta 2                                                                    | CCDS42020.1     | chr15_40581092-40581092_C_T   | 1128E>K | Substitution | Nonsynonymous coding | 14% |
| MM18T | PLCB4   | phospholipase C, beta 4                                                                    | CCDS13104.1     | chr20_9417653-9417653_A_G     | 861D>G  | Substitution | Nonsynonymous coding | 16% |
| MM18T | PLCD3   | phospholipase C, delta 3                                                                   | ENST00000322765 | chr17_43198284-43198284_C_T   | 180R>H  | Substitution | Nonsynonymous coding | 23% |
| MM18T | PLCD4   | phospholipase C, delta 4                                                                   | CCDS46516.1     | chr2_219480672-219480672_C_T  | 23P>L   | Substitution | Nonsynonymous coding | 14% |
| MM18T | PLCE1   | phospholipase C, epsilon 1                                                                 | CCDS41552.1     | chr10_96053392-96053392_A     | NA      | Insertion    | Frameshift           | 11% |
| MM18T | PLCE1   | phospholipase C, epsilon 1                                                                 | CCDS41552.1     | chr10_95931050-95931050_G_A   | 536A>T  | Substitution | Nonsynonymous coding | 15% |
| MM18T | PLCH1   | phospholipase C, eta 1                                                                     | CCDS46939.1     | chr3_155303879-155303879_C_T  | 180R>Q  | Substitution | Nonsynonymous coding | 14% |
| MM18T | PLD1    | phospholipase D1, phosphatidylcholine-specific                                             | CCDS3216.1      | chr3_171392310-171392310_A_G  | 737S>P  | Substitution | Nonsynonymous coding | 12% |
| MM18T | PLD1    | phospholipase D1, phosphatidylcholine-specific                                             | CCDS3216.1      | chr3_171405329-171405329_T_G  | 529N>H  | Substitution | Nonsynonymous coding | 10% |
| MM18T | PLD1    | phospholipase D1, phosphatidylcholine-specific                                             | CCDS3216.1      | chr3_171455452-171455452_A    | NA      | Deletion     | Splice site acceptor | 14% |
| MM18T | PLD2    | phospholipase D2                                                                           | CCDS11057.1     | chr17_4711170-4711170_G_A     | 35D>N   | Substitution | Nonsynonymous coding | 15% |
| MM18T | PLD2    | phospholipase D2                                                                           | CCDS11057.1     | chr17_4712642-4712642_G_A     | 180R>H  | Substitution | Nonsynonymous coding | 12% |
| MM18T | PLD4    | phospholipase D family, member 4                                                           | CCDS9995.2      | chr14_105395115-105395115_A_G | 105D>G  | Substitution | Nonsynonymous coding | 18% |
| MM18T | PLEC    | plectin                                                                                    | CCDS43772.1     | chr8_144992628-144992628_C_A  | 3924K>N | Substitution | Nonsynonymous coding | 19% |
| MM18T | PLEC    | plectin                                                                                    | CCDS43772.1     | chr8_144997389-144997389_C_A  | 2373Q>H | Substitution | Nonsynonymous coding | 19% |
| MM18T | PLEKHA2 | pleckstrin homology domain containing, family A (phosphoinositide binding specific) member | ENST00000420274 | chr8_38775473-38775473_G_T    | 9R>L    | Substitution | Nonsynonymous coding | 12% |
| MM18T | PLEKHA6 | pleckstrin homology domain containing, family A member 6                                   | CCDS1444.1      | chr1_204210876-204210876_C_A  | 747D>Y  | Substitution | Nonsynonymous coding | 12% |
| MM18T | PLEKHB1 | pleckstrin homology domain containing, family B (evectins) member 1                        | CCDS44672.1     | chr11_73366940-73366940_G_T   | 161E>D  | Substitution | Nonsynonymous coding | 12% |
| MM18T | PLEKHG1 | pleckstrin homology domain containing, family G (with RhoGef domain) member 1              | CCDS34552.1     | chr6_151054884-151054884_G_A  | 23D>N   | Substitution | Nonsynonymous coding | 13% |

|       |          |                                                                                |             |                               |         |              |                      |     |
|-------|----------|--------------------------------------------------------------------------------|-------------|-------------------------------|---------|--------------|----------------------|-----|
| MM18T | PLEKHG2  | pleckstrin homology domain containing, family G (with RhoGef domain) member 2  | CCDS33022.2 | chr19_39914442-39914442_C_A   | 890S>Y  | Substitution | Nonsynonymous coding | 16% |
| MM18T | PLEKHG4  | pleckstrin homology domain containing, family G (with RhoGef domain) member 4  | CCDS32466.1 | chr16_67319380-67319380_C_T   | 795R>C  | Substitution | Nonsynonymous coding | 16% |
| MM18T | PLEKHG4B | pleckstrin homology domain containing, family G (with RhoGef domain) member 4B | CCDS34124.1 | chr5_174168-174168_G_A        | 1097D>N | Substitution | Nonsynonymous coding | 15% |
| MM18T | PLEKHG6  | pleckstrin homology domain containing, family G (with RhoGef domain) member 6  | CCDS8541.1  | chr12_6426732-6426732_G_A     | 296R>H  | Substitution | Nonsynonymous coding | 14% |
| MM18T | PLEKHG6  | pleckstrin homology domain containing, family G (with RhoGef domain) member 6  | CCDS8541.1  | chr12_6436680-6436680_G_A     | 644R>Q  | Substitution | Nonsynonymous coding | 14% |
| MM18T | PLEKHH1  | pleckstrin homology domain containing, family H (with MyTH4 domain) member 1   | CCDS45128.1 | chr14_68041050-68041050_T_C   | 673V>A  | Substitution | Nonsynonymous coding | 12% |
| MM18T | PLEKHS1  | pleckstrin homology domain containing, family S member 1                       | CCDS7583.1  | chr10_115531832-115531832_G_A | 219R>Q  | Substitution | Nonsynonymous coding | 13% |
| MM18T | PLGRKT   | plasminogen receptor, C-terminal lysine transmembrane protein                  | CCDS6463.1  | chr9_5361185-5361185_G_A      | 72A>V   | Substitution | Nonsynonymous coding | 10% |
| MM18T | PLIN2    | perilipin 2                                                                    | CCDS6490.1  | chr9_19126204-19126204_G_T    | 45S>Y   | Substitution | Nonsynonymous coding | 14% |
| MM18T | PLK3     | polo-like kinase 3                                                             | CCDS515.1   | chr1_45266733-45266733_G_A    | 115R>Q  | Substitution | Nonsynonymous coding | 11% |
| MM18T | PLK4     | polo-like kinase 4                                                             | CCDS3735.1  | chr4_12881168-12881168_C_A    | 536S>Y  | Substitution | Nonsynonymous coding | 13% |
| MM18T | PLXDC2   | plexin domain containing 2                                                     | CCDS7132.1  | chr10_20290835-20290835_G_A   | 82V>I   | Substitution | Nonsynonymous coding | 10% |
| MM18T | PLXNA3   | plexin A3                                                                      | CCDS14752.1 | chrX_153689550-153689550_G_A  | 236V>M  | Substitution | Nonsynonymous coding | 22% |
| MM18T | PLXNA4   | plexin A4                                                                      | CCDS43646.1 | chr7_131817864-131817864_T_C  | 1845N>D | Substitution | Nonsynonymous coding | 12% |
| MM18T | PLXNA4   | plexin A4                                                                      | CCDS43646.1 | chr7_132193175-132193175_G_T  | 93P>H   | Substitution | Nonsynonymous coding | 17% |
| MM18T | PLXNB1   | plexin B1                                                                      | CCDS2765.1  | chr3_48463793-48463793_C_A    | 456D>Y  | Substitution | Nonsynonymous coding | 18% |
| MM18T | PLXNB1   | plexin B1                                                                      | CCDS2765.1  | chr3_48465158-48465158_G_A    | 288A>V  | Substitution | Nonsynonymous coding | 19% |
| MM18T | PLXNB3   | plexin B3                                                                      | CCDS14729.1 | chrX_153033346-153033346_C_T  | 355S>L  | Substitution | Nonsynonymous coding | 17% |
| MM18T | PLXNB3   | plexin B3                                                                      | CCDS14729.1 | chrX_153039681-153039681_G_A  | 1187R>H | Substitution | Nonsynonymous coding | 14% |
| MM18T | PLXNB3   | plexin B3                                                                      | CCDS14729.1 | chrX_153041490-153041490_C_T  | 1517T>M | Substitution | Nonsynonymous coding | 22% |
| MM18T | PLXNC1   | plexin C1                                                                      | CCDS9049.1  | chr12_94543705-94543705_C_T   | 320R>W  | Substitution | Nonsynonymous coding | 13% |
| MM18T | PLXND1   | plexin D1                                                                      | CCDS33854.1 | chr3_129277342-129277342_C_T  | 1792D>N | Substitution | Nonsynonymous coding | 13% |
| MM18T | PMEL     | premelanosome protein                                                          | CCDS8897.1  | chr12_56351297-56351297_C_A   | 264D>Y  | Substitution | Nonsynonymous coding | 13% |
| MM18T | PMS1     | PMS1 postmeiotic segregation increased 1 ( <i>S. cerevisiae</i> )              | CCDS2302.1  | chr2_190708705-190708705_A    | NA      | Insertion    | Frameshift           | 18% |
| MM18T | PNCK     | pregnancy up-regulated non-ubiquitously expressed CaM kinase                   | CCDS35503.2 | chrX_152936264-152936264_C_T  | 360D>N  | Substitution | Nonsynonymous coding | 15% |
| MM18T | PNKD     | paroxysmal nonkinesigenic dyskinesia                                           | CCDS2411.1  | chr2_219136108-219136108_T_G  | 24I>M   | Substitution | Nonsynonymous coding | 17% |
| MM18T | PNLIPRP3 | pancreatic lipase-related protein 3                                            | CCDS31292.1 | chr10_118215339-118215339_A_G | 188T>A  | Substitution | Nonsynonymous coding | 12% |
| MM18T | PNMA5    | paraneoplastic Ma antigen family member 5                                      | CCDS14718.1 | chrX_152159126-152159126_C_A  | 339K>N  | Substitution | Nonsynonymous coding | 13% |
| MM18T | PNMAL2   | paraneoplastic Ma antigen family-like 2                                        | NM_020709   | chr19_46997617-46997617_C_T   | 369R>Q  | Substitution | Nonsynonymous coding | 19% |
| MM18T | PNMAL2   | paraneoplastic Ma antigen family-like 2                                        | NM_020709   | chr19_46997776-46997776_G_A   | 316S>L  | Substitution | Nonsynonymous coding | 17% |
| MM18T | PNMT     | phenylethanolamine N-methyltransferase                                         | CCDS11343.1 | chr17_37824865-37824865_A_G   | 46D>G   | Substitution | Nonsynonymous coding | 12% |
| MM18T | PNPLA7   | patatin-like phospholipase domain containing                                   | CCDS48070.1 | chr9_140356686-140356686_C_T  | 1197R>H | Substitution | Nonsynonymous coding | 22% |

|       |          |                                                           |                |                               |        |              |                      |     |
|-------|----------|-----------------------------------------------------------|----------------|-------------------------------|--------|--------------|----------------------|-----|
| MM18T | PNPLA7   | patatin-like phospholipase domain containing 7            | CCDS48070.1    | chr9_140400121-140400121_G_A  | 473S>L | Substitution | Nonsynonymous coding | 29% |
| MM18T | PNPLA7   | patatin-like phospholipase domain containing 7            | CCDS48070.1    | chr9_140441760-140441760_C_T  | ISV+1> | Substitution | Splice site donor    | 19% |
| MM18T | PNPT1    | polyribonucleotide nucleotidyltransferase 1               | CCDS1856.1     | chr2_55906921-55906921_C_T    | 192R>Q | Substitution | Nonsynonymous coding | 14% |
| MM18T | PNPT1    | polyribonucleotide nucleotidyltransferase 1               | CCDS1856.1     | chr2_55883510-55883510_A_     | NA     | Deletion     | Splice site acceptor | 11% |
| MM18T | POC1B    | POC1 centriolar protein homolog B (Chlamydomonas)         | CCDS31869.1    | chr12_89885849-89885849_G_A   | 106R>X | Substitution | Nonsense             | 13% |
| MM18T | PODN     | podocan                                                   | CCDS573.1      | chr1_53535630-53535630_G_A    | 83G>S  | Substitution | Nonsynonymous coding | 15% |
| MM18T | PODXL    | podocalyxin-like                                          | CCDS34755.1    | chr7_131191054-131191054_C_T  | 426E>K | Substitution | Nonsynonymous coding | 13% |
| MM18T | POF1B    | premature ovarian failure, 1B                             | CCDS14452.1    | chrX_84562219-84562219_C_T    | 372E>K | Substitution | Nonsynonymous coding | 19% |
| MM18T | POF1B    | premature ovarian failure, 1B                             | CCDS14452.1    | chrX_84569499-84569499_T_C    | 299E>G | Substitution | Nonsynonymous coding | 12% |
| MM18T | POF1B    | premature ovarian failure, 1B                             | CCDS14452.1    | chrX_84586034-84586034_C_A    | 259E>X | Substitution | Nonsense             | 11% |
| MM18T | POFUT1   | protein O-fucosyltransferase 1                            | CCDS13198.1    | chr20_30804467-30804467_C_T   | 162S>L | Substitution | Nonsynonymous coding | 13% |
| MM18T | POGK     | pogo transposable element with KRAB domain                | CCDS1254.1     | chr1_166818303-166818303_G_A  | 163E>K | Substitution | Nonsynonymous coding | 14% |
| MM18T | POGLUT1  | protein O-glucosyltransferase 1                           | CCDS2988.1     | chr3_119196234-119196234_G_A  | 132R>Q | Substitution | Nonsynonymous coding | 11% |
| MM18T | POGZ     | pogo transposable element with ZNF domain                 | CCDS997.1      | chr1_151414568-151414568_T_G  | 38K>T  | Substitution | Nonsynonymous coding | 15% |
| MM18T | POLD2    | polymerase (DNA directed), delta 2, accessory subunit     | CCDS5477.1     | chr7_44154947-44154947_G_A    | 399P>L | Substitution | Nonsynonymous coding | 19% |
| MM18T | POLDIP2  | polymerase (DNA-directed), delta interacting protein 2    | ENST0000003607 | chr17_26678783-26678783_C_A   | 221E>D | Substitution | Nonsynonymous coding | 11% |
| MM18T | POLE     | polymerase (DNA directed), epsilon, catalytic subunit     | CCDS9278.1     | chr12_133250289-133250289_C_A | 411V>L | Substitution | Nonsynonymous coding | 10% |
| MM18T | POLE2    | polymerase (DNA directed), epsilon 2, accessory subunit   | CCDS32073.1    | chr14_50140866-50140866_C_T   | 131R>H | Substitution | Nonsynonymous coding | 11% |
| MM18T | POLG     | polymerase (DNA directed), gamma                          | CCDS10350.1    | chr15_89876795-89876795_G_A   | 64S>L  | Substitution | Nonsynonymous coding | 16% |
| MM18T | POLH     | polymerase (DNA directed), eta                            | CCDS4902.1     | chr6_43582028-43582028_C_A    | 626L>I | Substitution | Nonsynonymous coding | 12% |
| MM18T | POLI     | polymerase (DNA directed) iota                            | CCDS11954.2    | chr18_51818253-51818253_C_T   | 417R>X | Substitution | Nonsense             | 18% |
| MM18T | POLI     | polymerase (DNA directed) iota                            | CCDS11954.2    | chr18_51820587-51820587_C_A   | 658S>X | Substitution | Nonsense             | 19% |
| MM18T | POLR1A   | polymerase (RNA) I polypeptide A, 194kDa                  | CCDS42706.1    | chr2_86302178-86302178_G_A    | 529A>V | Substitution | Nonsynonymous coding | 18% |
| MM18T | POLR1B   | polymerase (RNA) I polypeptide B, 128kDa                  | CCDS2097.1     | chr2_113330181-113330181_G_A  | 706R>Q | Substitution | Nonsynonymous coding | 12% |
| MM18T | POLR1B   | polymerase (RNA) I polypeptide B, 128kDa                  | CCDS2097.1     | chr2_113331295-113331295_G_A  | 810D>N | Substitution | Nonsynonymous coding | 12% |
| MM18T | POLR3A   | polymerase (RNA) III (DNA directed) polypeptide A, 155kDa | CCDS7354.1     | chr10_79777374-79777374_G_A   | 464R>W | Substitution | Nonsynonymous coding | 14% |
| MM18T | POLR3A   | polymerase (RNA) III (DNA directed) polypeptide A, 155kDa | CCDS7354.1     | chr10_79781973-79781973_G_T   | 272S>Y | Substitution | Nonsynonymous coding | 10% |
| MM18T | POLR3B   | polymerase (RNA) III (DNA directed) polypeptide B         | CCDS9105.1     | chr12_106827548-106827548_G_A | 560R>Q | Substitution | Nonsynonymous coding | 17% |
| MM18T | POLR3E   | polymerase (RNA) III (DNA directed) polypeptide E (80kD)  | CCDS10605.1    | chr16_22337543-22337543_G_A   | 604D>N | Substitution | Nonsynonymous coding | 22% |
| MM18T | POLRMT   | polymerase (RNA) mitochondrial (DNA directed)             | CCDS12036.1    | chr19_620035-620035_C_T       | 937D>N | Substitution | Nonsynonymous coding | 21% |
| MM18T | POM121L2 | POM121 transmembrane nucleoporin-like 2                   | NM_033482      | chr6_2727219-2727219_C_A      | 911D>Y | Substitution | Nonsynonymous coding | 14% |
| MM18T | POM121L2 | POM121 transmembrane nucleoporin-like 2                   | NM_033482      | chr6_27279811-27279811_C_T    | 47A>T  | Substitution | Nonsynonymous coding | 12% |

|       |          |                                                                                         |                 |                               |         |              |                      |     |
|-------|----------|-----------------------------------------------------------------------------------------|-----------------|-------------------------------|---------|--------------|----------------------|-----|
| MM18T | POMC     | proopiomelanocortin                                                                     | CCDS1717.1      | chr2_25383985-25383985_C_T    | 257A>T  | Substitution | Nonsynonymous coding | 12% |
| MM18T | POMT2    | protein-O-mannosyltransferase 2                                                         | CCDS9857.1      | chr14_77765877-77765877_G_A   | 282R>C  | Substitution | Nonsynonymous coding | 11% |
| MM18T | POMT2    | protein-O-mannosyltransferase 2                                                         | CCDS9857.1      | chr14_77786960-77786960_C_T   | 22G>D   | Substitution | Nonsynonymous coding | 26% |
| MM18T | PON1     | paraoxonase 1                                                                           | CCDS5638.1      | chr7_94937436-94937436_C_A    | 195E>D  | Substitution | Nonsynonymous coding | 12% |
| MM18T | POPCD2   | popeye domain containing 2                                                              | CCDS2992.1      | chr3_119378871-119378871_C_T  | 134E>K  | Substitution | Nonsynonymous coding | 11% |
| MM18T | POPCD2   | popeye domain containing 2                                                              | CCDS2992.1      | chr3_119378880-119378880_G_T  | 131H>N  | Substitution | Nonsynonymous coding | 13% |
| MM18T | PORCN    | porcupine homolog (Drosophila)                                                          | CCDS14299.1     | chrX_48370846-48370846_C_A    | 169P>H  | Substitution | Nonsynonymous coding | 14% |
| MM18T | POUF2    | POU class 2 homeobox 2                                                                  | ENST00000342301 | chr19_42595432-42595432_C_T   | 591E>K  | Substitution | Nonsynonymous coding | 19% |
| MM18T | POUF41   | POU class 4 homeobox 1                                                                  | CCDS131996.1    | chr13_79175590-79175590_C_A   | 407R>I  | Substitution | Nonsynonymous coding | 14% |
| MM18T | PPARG    | peroxisome proliferator-activated receptor gamma                                        | CCDS2609.1      | chr3_12421358-12421358_G_T    | 80D>Y   | Substitution | Nonsynonymous coding | 13% |
| MM18T | PPFIA2   | protein tyrosine phosphatase, receptor type, f polypeptide (PTPRF), interacting protein | NM_003625       | chr12_81839369-81839369_G_A   | 179S>F  | Substitution | Nonsynonymous coding | 13% |
| MM18T | PPFIA3   | protein tyrosine phosphatase, receptor type, f polypeptide (PTPRF), interacting protein | CCDS12758.1     | chr19_49633845-49633845_G_A   | 290D>N  | Substitution | Nonsynonymous coding | 25% |
| MM18T | PPFIA3   | protein tyrosine phosphatase, receptor type, f polypeptide (PTPRF), interacting protein | CCDS12758.1     | chr19_49637930-49637930_A_C   | 471K>T  | Substitution | Nonsynonymous coding | 20% |
| MM18T | PPFIA4   | protein tyrosine phosphatase, receptor type, f polypeptide (PTPRF), interacting protein | CCDS44296.1     | chr1_203030138-203030138_C_T  | 436T>I  | Substitution | Nonsynonymous coding | 10% |
| MM18T | PPFIBP1  | PTPRF interacting protein, binding protein 1 (liprin beta 1)                            | CCDS8713.1      | chr12_27800708-27800708_G_A   | 135R>Q  | Substitution | Nonsynonymous coding | 12% |
| MM18T | PPIG     | peptidylprolyl isomerase G (cyclophilin G)                                              | CCDS2235.1      | chr2_170492738-170492738_A_C  | 385K>T  | Substitution | Nonsynonymous coding | 13% |
| MM18T | PPIG     | peptidylprolyl isomerase G (cyclophilin G)                                              | CCDS2235.1      | chr2_170493974-170493974_A_C  | 736K>Q  | Substitution | Nonsynonymous coding | 12% |
| MM18T | PPIP5K2  | diphosphoinositol pentakisphosphate kinase 2                                            | CCDS34207.1     | chr5_102493898-102493898_G_A  | 499R>Q  | Substitution | Nonsynonymous coding | 12% |
| MM18T | PPIP5K2  | diphosphoinositol pentakisphosphate kinase 2                                            | CCDS34207.1     | chr5_102519017-102519017_G_A  | 1002R>Q | Substitution | Nonsynonymous coding | 15% |
| MM18T | PPM1D    | protein phosphatase, Mg2+/Mn2+ dependent, 1D                                            | CCDS11625.1     | chr17_58740764-58740764_C_T   | 557R>X  | Substitution | Nonsense             | 15% |
| MM18T | PPP1R12C | protein phosphatase 1, regulatory subunit 12C                                           | CCDS12916.1     | chr19_55607518-55607518_C_T   | 352E>K  | Substitution | Nonsynonymous coding | 16% |
| MM18T | PPP1R13B | protein phosphatase 1, regulatory subunit 13B                                           | CCDS41997.1     | chr14_104205249-104205249_C_T | 902D>N  | Substitution | Nonsynonymous coding | 14% |
| MM18T | PPP1R13B | protein phosphatase 1, regulatory subunit 13B                                           | CCDS41997.1     | chr14_104208325-104208325_C_T | 542D>N  | Substitution | Nonsynonymous coding | 15% |
| MM18T | PPP1R16B | protein phosphatase 1, regulatory subunit 16B                                           | CCDS13309.1     | chr20_37464624-37464624_C_T   | 19T>M   | Substitution | Nonsynonymous coding | 16% |
| MM18T | PPP1R16B | protein phosphatase 1, regulatory subunit 16B                                           | CCDS13309.1     | chr20_37547193-37547193_A_G   | 530S>G  | Substitution | Nonsynonymous coding | 16% |
| MM18T | PPP1R21  | protein phosphatase 1, regulatory subunit 21                                            | CCDS46278.1     | chr2_48725735-48725735_G_A    | 599R>Q  | Substitution | Nonsynonymous coding | 14% |
| MM18T | PPP1R37  | protein phosphatase 1, regulatory subunit 37                                            | ENST00000421905 | chr19_45643516-45643516_G_A   | 108R>H  | Substitution | Nonsynonymous coding | 12% |
| MM18T | PPP1R3A  | protein phosphatase 1, regulatory subunit 3A                                            | CCDS5759.1      | chr7_113519690-113519690_C_T  | 486R>Q  | Substitution | Nonsynonymous coding | 13% |
| MM18T | PPP1R3F  | protein phosphatase 1, regulatory subunit 3F                                            | CCDS35254.1     | chrX_49127110-49127110_G_A    | 260D>N  | Substitution | Nonsynonymous coding | 18% |
| MM18T | PPP1R3F  | protein phosphatase 1, regulatory subunit 3F                                            | CCDS35254.1     | chrX_49143377-49143377_C_A    | 742S>Y  | Substitution | Nonsynonymous coding | 13% |
| MM18T | PPP1R9A  | protein phosphatase 1, regulatory subunit 9A                                            | CCDS34683.1     | chr7_94750071-94750071_G_T    | 526D>Y  | Substitution | Nonsynonymous coding | 13% |
| MM18T | PPP1R9A  | protein phosphatase 1, regulatory subunit 9A                                            | CCDS34683.1     | chr7_94897931-94897931_C_A    | 890S>Y  | Substitution | Nonsynonymous coding | 12% |

|       |          |                                                                          |                 |                              |         |              |                      |     |
|-------|----------|--------------------------------------------------------------------------|-----------------|------------------------------|---------|--------------|----------------------|-----|
| MM18T | PPP1R9A  | protein phosphatase 1, regulatory subunit 9A                             | CCDS34683.1     | chr7_94917893-94917893_C_T   | 983R>W  | Substitution | Nonsynonymous coding | 11% |
| MM18T | PPP1R9A  | protein phosphatase 1, regulatory subunit 9A                             | CCDS34683.1     | chr7_94919470-94919470_C_A   | 1051S>Y | Substitution | Nonsynonymous coding | 15% |
| MM18T | PPP1R9B  | protein phosphatase 1, regulatory subunit 9B                             | ENST00000316878 | chr17_48216857-48216857_C_A  | 650E>D  | Substitution | Nonsynonymous coding | 14% |
| MM18T | PPP2R5A  | protein phosphatase 2, regulatory subunit B', alpha                      | CCDS1503.1      | chr1_212521829-212521829_T_G | 288F>C  | Substitution | Nonsynonymous coding | 13% |
| MM18T | PPP2R5D  | protein phosphatase 2, regulatory subunit B', delta                      | CCDS4878.1      | chr6_42976872-42976872_G_T   | 386E>D  | Substitution | Nonsynonymous coding | 11% |
| MM18T | PPP4R1   | protein phosphatase 4, regulatory subunit 1                              | CCDS42412.1     | chr18_9593792-9593792_C_A    | 90R>I   | Substitution | Nonsynonymous coding | 13% |
| MM18T | PPP4R1L  | protein phosphatase 4, regulatory subunit 1-like                         | ENST00000334187 | chr20_56821277-56821277_C_T  | 329E>K  | Substitution | Nonsynonymous coding | 12% |
| MM18T | PPP5C    | protein phosphatase 5, catalytic subunit                                 | CCDS12684.1     | chr19_46879745-46879745_G_T  | 183D>Y  | Substitution | Nonsynonymous coding | 16% |
| MM18T | PPP6R2   | protein phosphatase 6, regulatory subunit 2                              | CCDS33681.1     | chr22_50882468-50882468_C_T  | 891A>V  | Substitution | Nonsynonymous coding | 22% |
| MM18T | PPWD1    | peptidylprolyl isomerase domain and WD repeat containing 1               | CCDS3985.1      | chr5_64867770-64867770_G_A   | 209R>Q  | Substitution | Nonsynonymous coding | 13% |
| MM18T | PPY      | pancreatic polypeptide                                                   | CCDS11472.1     | chr17_42018571-42018571_C_A  | 68R>I   | Substitution | Nonsynonymous coding | 11% |
| MM18T | PQBP1    | polyglutamine binding protein 1                                          | CCDS14309.1     | chrX_48759642-48759642_G_A   | 142R>Q  | Substitution | Nonsynonymous coding | 12% |
| MM18T | PRC1     | protein regulator of cytokinesis 1                                       | CCDS32334.1     | chr15_91527991-91527991_A_G  | 26W>R   | Substitution | Nonsynonymous coding | 10% |
| MM18T | PRCP     | prolylcarboxypeptidase (angiotensinase C)                                | CCDS41695.1     | chr11_82561451-82561451_T_G  | 191N>H  | Substitution | Nonsynonymous coding | 16% |
| MM18T | PRDM1    | PR domain containing 1, with ZNF domain                                  | CCDS5054.2      | chr6_106555110-106555110_G_A | 743E>K  | Substitution | Nonsynonymous coding | 15% |
| MM18T | PRDM12   | PR domain containing 12                                                  | CCDS6934.1      | chr9_133543570-133543570_G_A | 147R>H  | Substitution | Nonsynonymous coding | 12% |
| MM18T | PRDM14   | PR domain containing 14                                                  | CCDS6206.1      | chr8_70982014-70982014_C_T   | 28A>T   | Substitution | Nonsynonymous coding | 21% |
| MM18T | PRDM2    | PR domain containing 2, with ZNF domain                                  | CCDS1150.1      | chr1_14108757-14108757_A_C   | 1489K>N | Substitution | Nonsynonymous coding | 15% |
| MM18T | PRDM5    | PR domain containing 5                                                   | CCDS3716.1      | chr4_121774591-121774591_C_A | 94K>N   | Substitution | Nonsynonymous coding | 13% |
| MM18T | PRDM6    | PR domain containing 6                                                   | CCDS47259.1     | chr5_122435637-122435637_A_C | 294N>T  | Substitution | Nonsynonymous coding | 22% |
| MM18T | PRDM8    | PR domain containing 8                                                   | CCDS43243.1     | chr4_81122552-81122552_G_A   | 110G>R  | Substitution | Nonsynonymous coding | 13% |
| MM18T | PRDM8    | PR domain containing 8                                                   | CCDS43243.1     | chr4_81124223-81124223_G_T   | 536R>I  | Substitution | Nonsynonymous coding | 25% |
| MM18T | PRDM9    | PR domain containing 9                                                   | CCDS43307.1     | chr5_23509166-23509166_G_T   | 8E>D    | Substitution | Nonsynonymous coding | 15% |
| MM18T | PRELP    | proline/arginine-rich end leucine-rich repeat protein                    | CCDS1438.1      | chr1_203452722-203452722_G_A | 137R>Q  | Substitution | Nonsynonymous coding | 17% |
| MM18T | PREP     | prolyl endopeptidase                                                     | CCDS5053.1      | chr6_105726225-105726225_G_A | 643R>C  | Substitution | Nonsynonymous coding | 16% |
| MM18T | PREX1    | phosphatidylinositol-3,4,5-trisphosphate-dependent Rac exchange factor 1 | CCDS13410.1     | chr20_47248858-47248858_C_T  | 1495A>T | Substitution | Nonsynonymous coding | 15% |
| MM18T | PREX1    | phosphatidylinositol-3,4,5-trisphosphate-dependent Rac exchange factor 1 | CCDS13410.1     | chr20_47267939-47267939_C_T  | 884A>T  | Substitution | Nonsynonymous coding | 12% |
| MM18T | PREX1    | phosphatidylinositol-3,4,5-trisphosphate-dependent Rac exchange factor 1 | CCDS13410.1     | chr20_47296239-47296239_C_T  | 497D>N  | Substitution | Nonsynonymous coding | 12% |
| MM18T | PREX1    | phosphatidylinositol-3,4,5-trisphosphate-dependent Rac exchange factor 1 | CCDS13410.1     | chr20_47309257-47309257_C_T  | 330R>Q  | Substitution | Nonsynonymous coding | 16% |
| MM18T | PREX2    | phosphatidylinositol-3,4,5-trisphosphate-dependent Rac exchange factor 2 | CCDS6201.1      | chr8_69020534-69020534_C_A   | 969S>Y  | Substitution | Nonsynonymous coding | 11% |
| MM18T | PRF1     | perforin 1 (pore forming protein)                                        | CCDS7305.1      | chr10_72358575-72358575_G_A  | 301S>L  | Substitution | Nonsynonymous coding | 20% |
| MM18T | PRICKLE3 | prickle homolog 3 (Drosophila)                                           | CCDS14320.1     | chrX_49035673-49035673_C_T   | 164R>Q  | Substitution | Nonsynonymous coding | 14% |



|       |         |                                                                  |                 |                               |         |              |                      |     |
|-------|---------|------------------------------------------------------------------|-----------------|-------------------------------|---------|--------------|----------------------|-----|
| MM18T | PRKAR1A | protein kinase, cAMP-dependent, regulatory, type I, alpha        | CCDS11678.1     | chr17_66523994-66523994_G_T   | 241R>I  | Substitution | Nonsynonymous coding | 13% |
| MM18T | PRKAR1A | protein kinase, cAMP-dependent, regulatory, type I, alpha        | CCDS11678.1     | chr17_66521949-66521949_G_T   | 202E>X  | Substitution | Nonsense             | 14% |
| MM18T | PRKAR2A | protein kinase, cAMP-dependent, regulatory, type II, alpha       | CCDS2778.1      | chr3_48789131-48789131_C_T    | 368E>K  | Substitution | Nonsynonymous coding | 13% |
| MM18T | PRKCE   | protein kinase C, epsilon                                        | CCDS1824.1      | chr2_46386886-46386886_C_T    | 688R>C  | Substitution | Nonsynonymous coding | 13% |
| MM18T | PRKCG   | protein kinase C, gamma                                          | CCDS12867.1     | chr19_54385842-54385842_G_A   | 32E>K   | Substitution | Nonsynonymous coding | 17% |
| MM18T | PRKCG   | protein kinase C, gamma                                          | CCDS12867.1     | chr19_54401214-54401214_G_A   | 314R>Q  | Substitution | Nonsynonymous coding | 14% |
| MM18T | PRKCH   | protein kinase C, eta                                            | CCDS9752.1      | chr14_61920061-61920061_C_A   | 317S>Y  | Substitution | Nonsynonymous coding | 16% |
| MM18T | PRKCI   | protein kinase C, iota                                           | CCDS3212.2      | chr3_169988233-169988233_G_T  | 159D>Y  | Substitution | Nonsynonymous coding | 25% |
| MM18T | PRKCK   | protein kinase C, theta                                          | CCDS7079.1      | chr10_6540364-6540364_A_G     | 179F>S  | Substitution | Nonsynonymous coding | 16% |
| MM18T | PRKCZ   | protein kinase C, zeta                                           | CCDS37.1        | chr1_2103768-2103768_G_A      | 409S>N  | Substitution | Nonsynonymous coding | 10% |
| MM18T | PRKDC   | protein kinase, DNA-activated, catalytic polypeptide             | ENST00000314191 | chr8_48739269-48739269_G_A    | 2910R>C | Substitution | Nonsynonymous coding | 15% |
| MM18T | PRMT2   | protein arginine methyltransferase 2                             | ENST00000334494 | chr21_48071830-48071830_T_G   | 256L>R  | Substitution | Nonsynonymous coding | 14% |
| MM18T | PRMT2   | protein arginine methyltransferase 2                             | CCDS13737.1     | chr21_48081736-48081736_G_A   | 329D>N  | Substitution | Nonsynonymous coding | 16% |
| MM18T | PROKR1  | prokineticin receptor 1                                          | CCDS1889.1      | chr2_68882191-68882191_C_A    | 222P>H  | Substitution | Nonsynonymous coding | 17% |
| MM18T | PROM1   | prominin 1                                                       | CCDS47029.1     | chr4_15982049-15982049_C_T    | 829D>N  | Substitution | Nonsynonymous coding | 16% |
| MM18T | PROM2   | prominin 2                                                       | CCDS2012.1      | chr2_95942352-95942352_C_T    | 210A>V  | Substitution | Nonsynonymous coding | 21% |
| MM18T | PROSC   | proline synthetase co-transcribed homolog (bacterial)            | CCDS6096.1      | chr8_37623149-37623149_T_G    | 69Y>D   | Substitution | Nonsynonymous coding | 15% |
| MM18T | PROZ    | protein Z, vitamin K-dependent plasma glycoprotein               | CCDS9531.1      | chr13_113826166-113826166_G_A | 317R>Q  | Substitution | Nonsynonymous coding | 17% |
| MM18T | PRPF19  | PRP19/PSO4 pre-mRNA processing factor 19 homolog (S. cerevisiae) | CCDS7995.1      | chr11_60666069-60666069_C_A   | 362G>X  | Substitution | Nonsense             | 10% |
| MM18T | PRPF31  | PRP31 pre-mRNA processing factor 31 homolog (S. cerevisiae)      | CCDS12879.1     | chr19_54625275-54625275_T_C   | 92V>A   | Substitution | Nonsynonymous coding | 15% |
| MM18T | PRPF38A | PRP38 pre-mRNA processing factor 38 (yeast) domain containing A  | CCDS567.1       | chr1_52878279-52878279_G_T    | 198E>X  | Substitution | Nonsense             | 13% |
| MM18T | PRPF38B | PRP38 pre-mRNA processing factor 38 (yeast) domain containing B  | CCDS788.1       | chr1_109242016-109242016_C_T  | 339R>C  | Substitution | Nonsynonymous coding | 17% |
| MM18T | PRPF38B | PRP38 pre-mRNA processing factor 38 (yeast) domain containing B  | CCDS788.1       | chr1_109242028-109242028_C_T  | 343R>C  | Substitution | Nonsynonymous coding | 16% |
| MM18T | PRPF8   | PRP8 pre-mRNA processing factor 8 homolog (S. cerevisiae)        | CCDS11010.1     | chr17_1564698-1564698_C_T     | 1402R>H | Substitution | Nonsynonymous coding | 20% |
| MM18T | PRPF8   | PRP8 pre-mRNA processing factor 8 homolog (S. cerevisiae)        | CCDS11010.1     | chr17_1585146-1585146_G_T     | 207F>L  | Substitution | Nonsynonymous coding | 14% |
| MM18T | PRPS2   | phosphoribosyl pyrophosphate synthetase 2                        | CCDS43918.1     | chrX_12837790-12837790_C_A    | 235A>D  | Substitution | Nonsynonymous coding | 22% |
| MM18T | PRR14   | proline rich 14                                                  | CCDS10687.1     | chr16_30667606-30667606_G_T   | 578D>Y  | Substitution | Nonsynonymous coding | 14% |
| MM18T | PRR16   | proline rich 16                                                  | CCDS4127.1      | chr5_120021953-120021953_G_A  | 132R>Q  | Substitution | Nonsynonymous coding | 14% |
| MM18T | PRR23B  | proline rich 23B                                                 | CCDS33868.1     | chr3_138738723-138738723_G_A  | 261R>C  | Substitution | Nonsynonymous coding | 17% |
| MM18T | PRR25   | proline rich 25                                                  | CCDS45372.1     | chr16_855450-855450_G_A       | 3R>Q    | Substitution | Nonsynonymous coding | 14% |
| MM18T | PRR25   | proline rich 25                                                  | CCDS45372.1     | chr16_855755-855755_T_C       | 105C>R  | Substitution | Nonsynonymous coding | 10% |
| MM18T | PRR26   | proline rich 26                                                  | ENST00000381489 | chr10_696223-696223_G_A       | 58R>Q   | Substitution | Nonsynonymous coding | 27% |

|       |        |                                                                       |                 |                              |         |              |                      |     |
|-------|--------|-----------------------------------------------------------------------|-----------------|------------------------------|---------|--------------|----------------------|-----|
| MM18T | PRRC2A | proline-rich coiled-coil 2A                                           | CCDS4708.1      | chr6_31604150-31604150_C_A   | 1930S>Y | Substitution | Nonsynonymous coding | 11% |
| MM18T | PRRC2B | proline-rich coiled-coil 2B                                           | CCDS48044.1     | chr9_134351033-134351033_G_A | 1173D>N | Substitution | Nonsynonymous coding | 16% |
| MM18T | PRRC2C | proline-rich coiled-coil 2C                                           | NM_015172       | chr1_171506524-171506524_C_T | 804R>C  | Substitution | Nonsynonymous coding | 24% |
| MM18T | PRRG4  | proline rich Gla (G-carboxyglutamic acid) 4 (transmembrane)           | CCDS7881.1      | chr11_32874895-32874895_G_T  | 168R>I  | Substitution | Nonsynonymous coding | 12% |
| MM18T | PRRT1  | proline-rich transmembrane protein 1 [Source:HGNC Symbol;Acc:13943]   | CCDS4739.1      | chr6_32117151-32117151_C_A   | 257D>Y  | Substitution | Nonsynonymous coding | 20% |
| MM18T | PRSS16 | protease, serine, 16 (thymus)                                         | CCDS4623.1      | chr6_27215789-27215789_G_T   | 67D>Y   | Substitution | Nonsynonymous coding | 12% |
| MM18T | PRSS23 | protease, serine, 23                                                  | CCDS8278.1      | chr11_86519328-86519328_G_A  | 215E>K  | Substitution | Nonsynonymous coding | 13% |
| MM18T | PRSS48 | protease, serine, 48                                                  | CCDS47145.1     | chr4_152203391-152203391_G_A | 103V>I  | Substitution | Nonsynonymous coding | 11% |
| MM18T | PRSS50 | protease, serine, 50                                                  | CCDS2745.1      | chr3_46757103-46757103_C_T   | 131R>Q  | Substitution | Nonsynonymous coding | 12% |
| MM18T | PRSS53 | protease, serine, 53                                                  | CCDS42153.1     | chr16_31100096-31100096_G_A  | 12A>V   | Substitution | Nonsynonymous coding | 12% |
| MM18T | PRUNE2 | prune homolog 2 (Drosophila)                                          | CCDS47982.1     | chr9_79320304-79320304_C_T   | 2296E>K | Substitution | Nonsynonymous coding | 20% |
| MM18T | PRUNE2 | prune homolog 2 (Drosophila)                                          | CCDS47982.1     | chr9_79323589-79323589_G_A   | 1201P>S | Substitution | Nonsynonymous coding | 15% |
| MM18T | PRUNE2 | prune homolog 2 (Drosophila)                                          | CCDS47982.1     | chr9_79244209-79244209_A     | NA      | Insertion    | Splice site acceptor | 19% |
| MM18T | PSAP   | prosaposin                                                            | CCDS7311.1      | chr10_73594151-73594151_G_T  | 51T>N   | Substitution | Nonsynonymous coding | 12% |
| MM18T | PSD2   | pleckstrin and Sec7 domain containing 2                               | CCDS4216.1      | chr5_139217369-139217369_T_C | ISV+2>  | Substitution | Splice site donor    | 13% |
| MM18T | PSD3   | pleckstrin and Sec7 domain containing 3                               | CCDS43720.1     | chr8_18432647-18432647_A_C   | 877F>C  | Substitution | Nonsynonymous coding | 17% |
| MM18T | PSD3   | pleckstrin and Sec7 domain containing 3                               | CCDS43720.1     | chr8_18729227-18729227_G_A   | 383R>C  | Substitution | Nonsynonymous coding | 14% |
| MM18T | PSMB10 | proteasome (prosome, macropain) subunit, beta type, 10                | CCDS10853.1     | chr16_67968855-67968855_C_T  | ISV-4>  | Substitution | Splice site acceptor | 21% |
| MM18T | PSMB2  | proteasome (prosome, macropain) subunit, beta type, 2                 | CCDS394.1       | chr1_36068933-36068933_G_A   | 181R>X  | Substitution | Nonsense             | 11% |
| MM18T | PSMC5  | proteasome (prosome, macropain) 26S subunit, ATPase, 5                | CCDS11645.1     | chr17_61907214-61907214_C_T  | 57R>C   | Substitution | Nonsynonymous coding | 11% |
| MM18T | PSMD5  | proteasome (prosome, macropain) 26S subunit, non-ATPase, 5            | CCDS6824.1      | chr9_123586904-123586904_G_A | 292R>C  | Substitution | Nonsynonymous coding | 17% |
| MM18T | PSME3  | proteasome (prosome, macropain) activator subunit 3 (PA28 gamma; Ki)  | CCDS11442.1     | chr17_40989682-40989682_G_A  | 87R>Q   | Substitution | Nonsynonymous coding | 15% |
| MM18T | PTCH1  | patched 1                                                             | CCDS6714.1      | chr9_98231125-98231125_G_T   | 720L>I  | Substitution | Nonsynonymous coding | 15% |
| MM18T | PTCH1  | patched 1                                                             | CCDS6714.1      | chr9_98232138-98232138_G_A   | 602R>X  | Substitution | Nonsense             | 19% |
| MM18T | PTCHD4 | patched domain containing 4                                           | NM_001013732    | chr6_47847243-47847243_A_C   | 446I>S  | Substitution | Nonsynonymous coding | 12% |
| MM18T | PTEN   | phosphatase and tensin homolog                                        | NM_000314       | chr10_89720678-89720678_A_G  | 277T>A  | Substitution | Nonsynonymous coding | 25% |
| MM18T | PTEN   | phosphatase and tensin homolog                                        | NM_000314       | chr10_89720681-89720681_T_C  | 278F>L  | Substitution | Nonsynonymous coding | 24% |
| MM18T | PTGFRN | prostaglandin F2 receptor inhibitor                                   | CCDS890.1       | chr1_117492084-117492084_C_A | 368S>Y  | Substitution | Nonsynonymous coding | 17% |
| MM18T | PTGFRN | prostaglandin F2 receptor inhibitor                                   | CCDS890.1       | chr1_117509744-117509744_G_T | 617E>D  | Substitution | Nonsynonymous coding | 16% |
| MM18T | PTGS1  | prostaglandin-endoperoxide synthase 1 (prostaglandin G/H synthase and | ENST00000373698 | chr9_125133449-125133449_T_C | 29I>T   | Substitution | Nonsynonymous coding | 12% |
| MM18T | PTH1R  | parathyroid hormone 1 receptor                                        | CCDS2747.1      | chr3_46939656-46939656_T_G   | 173F>V  | Substitution | Nonsynonymous coding | 12% |
| MM18T | PTH2R  | parathyroid hormone 2 receptor                                        | CCDS2383.1      | chr2_209292978-209292978_A_C | 43K>T   | Substitution | Nonsynonymous coding | 11% |

|       |        |                                                                                     |             |                              |         |              |                      |     |
|-------|--------|-------------------------------------------------------------------------------------|-------------|------------------------------|---------|--------------|----------------------|-----|
| MM18T | PTK2   | PTK2 protein tyrosine kinase 2                                                      | CCDS6381.1  | chr8_141889678-141889678_A_G | 85F>S   | Substitution | Nonsynonymous coding | 17% |
| MM18T | PTK2B  | PTK2B protein tyrosine kinase 2 beta                                                | CCDS6057.1  | chr8_27278190-27278190_C_T   | 134R>C  | Substitution | Nonsynonymous coding | 14% |
| MM18T | PTK7   | PTK7 protein tyrosine kinase 7                                                      | CCDS4884.1  | chr6_43044231-43044231_G_A   | 2G>E    | Substitution | Nonsynonymous coding | 17% |
| MM18T | PTK7   | PTK7 protein tyrosine kinase 7                                                      | CCDS4884.1  | chr6_43096945-43096945_C_T   | 104R>W  | Substitution | Nonsynonymous coding | 13% |
| MM18T | PTPLA  | protein tyrosine phosphatase-like (proline instead of catalytic arginine), member A | CCDS7121.1  | chr10_17646049-17646049_A_   | NA      | Deletion     | Splice site acceptor | 15% |
| MM18T | PTPN1  | protein tyrosine phosphatase, non-receptor type 1                                   | CCDS13430.1 | chr20_49197908-49197908_G_A  | 399E>K  | Substitution | Nonsynonymous coding | 10% |
| MM18T | PTPN12 | protein tyrosine phosphatase, non-receptor type 12                                  | CCDS5592.1  | chr7_77256278-77256278_A_    | NA      | Insertion    | Frameshift           | 12% |
| MM18T | PTPN12 | protein tyrosine phosphatase, non-receptor type 12                                  | CCDS5592.1  | chr7_77256275-77256275_G_T   | 427D>Y  | Substitution | Nonsynonymous coding | 13% |
| MM18T | PTPN13 | protein tyrosine phosphatase, non-receptor type 13 (APO-1/CD95 (Fas)-associated     | CCDS47093.1 | chr4_87683882-87683882_C_T   | 1186P>S | Substitution | Nonsynonymous coding | 10% |
| MM18T | PTPN13 | protein tyrosine phosphatase, non-receptor type 13 (APO-1/CD95 (Fas)-associated     | CCDS47093.1 | chr4_87691129-87691129_C_A   | 1571S>Y | Substitution | Nonsynonymous coding | 15% |
| MM18T | PTPN2  | protein tyrosine phosphatase, non-receptor type 2                                   | CCDS11865.1 | chr18_12794465-12794465_G_A  | 354R>X  | Substitution | Nonsense             | 13% |
| MM18T | PTPN21 | protein tyrosine phosphatase, non-receptor type 21                                  | CCDS9884.1  | chr14_88940113-88940113_T_   | NA      | Deletion     | Frameshift           | 16% |
| MM18T | PTPN22 | protein tyrosine phosphatase, non-receptor type 22 (lymphoid)                       | CCDS863.1   | chr1_114380783-114380783_T_G | 413Q>H  | Substitution | Nonsynonymous coding | 14% |
| MM18T | PTPRB  | protein tyrosine phosphatase, receptor type, B                                      | CCDS44943.1 | chr12_70954487-70954487_C_A  | 1466D>Y | Substitution | Nonsynonymous coding | 10% |
| MM18T | PTPRB  | protein tyrosine phosphatase, receptor type, B                                      | CCDS44943.1 | chr12_70960350-70960350_G_A  | 1257R>C | Substitution | Nonsynonymous coding | 10% |
| MM18T | PTPRD  | protein tyrosine phosphatase, receptor type, D                                      | CCDS43786.1 | chr9_8518336-8518336_G_A     | 352S>F  | Substitution | Nonsynonymous coding | 22% |
| MM18T | PTPRF  | protein tyrosine phosphatase, receptor type, F                                      | CCDS489.2   | chr1_44083479-44083479_C_T   | 1423T>M | Substitution | Nonsynonymous coding | 14% |
| MM18T | PTPRK  | protein tyrosine phosphatase, receptor type, K                                      | CCDS47473.1 | chr6_128403711-128403711_A_C | 550L>V  | Substitution | Nonsynonymous coding | 12% |
| MM18T | PTPRO  | protein tyrosine phosphatase, receptor type, O                                      | CCDS8675.1  | chr12_15654583-15654583_C_T  | 231R>C  | Substitution | Nonsynonymous coding | 11% |
| MM18T | PTPRR  | protein tyrosine phosphatase, receptor type, R                                      | CCDS8998.1  | chr12_71056341-71056341_T_G  | 514K>N  | Substitution | Nonsynonymous coding | 21% |
| MM18T | PTPRU  | protein tyrosine phosphatase, receptor type, U                                      | CCDS334.1   | chr1_29585824-29585824_G_T   | 177D>Y  | Substitution | Nonsynonymous coding | 25% |
| MM18T | PTPRU  | protein tyrosine phosphatase, receptor type, U                                      | CCDS334.1   | chr1_29649980-29649980_G_A   | 1319R>Q | Substitution | Nonsynonymous coding | 29% |
| MM18T | PTPRZ1 | protein tyrosine phosphatase, receptor-type, Z polypeptide 1                        | CCDS34740.1 | chr7_121636476-121636476_G_T | 323E>D  | Substitution | Nonsynonymous coding | 20% |
| MM18T | PTPRZ1 | protein tyrosine phosphatase, receptor-type, Z polypeptide 1                        | CCDS34740.1 | chr7_121651597-121651597_C_T | 833R>C  | Substitution | Nonsynonymous coding | 13% |
| MM18T | PTPRZ1 | protein tyrosine phosphatase, receptor-type, Z polypeptide 1                        | CCDS34740.1 | chr7_121653694-121653694_C_T | 1532P>S | Substitution | Nonsynonymous coding | 16% |
| MM18T | PTRF   | polymerase I and transcript release factor                                          | CCDS11425.1 | chr17_40557081-40557081_G_A  | 266T>M  | Substitution | Nonsynonymous coding | 16% |
| MM18T | PTX4   | pentraxin 4, long                                                                   | CCDS32362.1 | chr16_1537746-1537746_G_A    | 118R>W  | Substitution | Nonsynonymous coding | 19% |
| MM18T | PUM1   | pumilio homolog 1 (Drosophila)                                                      | CCDS44099.1 | chr1_31501696-31501696_C_A   | 127E>X  | Substitution | Nonsense             | 17% |
| MM18T | PURG   | purine-rich element binding protein G                                               | CCDS34878.1 | chr8_30889653-30889653_A_C   | 216L>V  | Substitution | Nonsynonymous coding | 13% |
| MM18T | PWWP2A | PWWP domain containing 2A                                                           | CCDS47332.1 | chr5_159546318-159546318_C_A | 26E>D   | Substitution | Nonsynonymous coding | 13% |
| MM18T | PXDN   | peroxidasin homolog (Drosophila)                                                    | CCDS46221.1 | chr2_1652921-1652921_G_T     | 877F>L  | Substitution | Nonsynonymous coding | 22% |
| MM18T | PXDNL  | peroxidasin homolog (Drosophila)-like                                               | CCDS47855.1 | chr8_52321633-52321633_C_T   | 851D>N  | Substitution | Nonsynonymous coding | 20% |

|       |          |                                                      |             |                              |        |              |                      |     |
|-------|----------|------------------------------------------------------|-------------|------------------------------|--------|--------------|----------------------|-----|
| MM18T | PXDL     | peroxidasin homolog (Drosophila)-like                | CCDS47855.1 | chr8_52321900-52321900_G_A   | 762R>C | Substitution | Nonsynonymous coding | 19% |
| MM18T | PYGL     | phosphorylase, glycogen, liver                       | CCDS32080.1 | chr14_51382124-51382124_G_T  | 445L>I | Substitution | Nonsynonymous coding | 10% |
| MM18T | PYGO1    | pygopus homolog 1 (Drosophila)                       | CCDS10155.1 | chr15_55839078-55839078_G_T  | 135P>T | Substitution | Nonsynonymous coding | 13% |
| MM18T | PYGO1    | pygopus homolog 1 (Drosophila)                       | CCDS10155.1 | chr15_55839135-55839135_A_G  | 116S>P | Substitution | Nonsynonymous coding | 14% |
| MM18T | PZP      | pregnancy-zone protein                               | CCDS8600.1  | chr12_9334612-9334612_C_A    | 550D>Y | Substitution | Nonsynonymous coding | 12% |
| MM18T | QPCT     | glutaminyl-peptide cyclotransferase                  | CCDS1790.1  | chr2_37579960-37579960_C_A   | 50S>X  | Substitution | Nonsense             | 12% |
| MM18T | QPCTL    | glutaminyl-peptide cyclotransferase-like             | CCDS12672.1 | chr19_46202104-46202104_T_G  | 278F>V | Substitution | Nonsynonymous coding | 16% |
| MM18T | QRICH2   | glutamine rich 2                                     | CCDS32741.1 | chr17_74287695-74287695_C_T  | 872R>Q | Substitution | Nonsynonymous coding | 14% |
| MM18T | QTRTD1   | queuine tRNA-ribosyltransferase domain containing 1  | CCDS33828.1 | chr3_113795663-113795663_G_A | 207R>Q | Substitution | Nonsynonymous coding | 14% |
| MM18T | R3HDM1   | R3H domain containing 1                              | CCDS2177.1  | chr2_136396581-136396581_C_T | 370R>X | Substitution | Nonsense             | 16% |
| MM18T | R3HDML   | R3H domain containing-like                           | CCDS13329.1 | chr20_42965981-42965981_G_T  | 62D>Y  | Substitution | Nonsynonymous coding | 11% |
| MM18T | RAB27B   | RAB27B, member RAS oncogene family                   | CCDS11958.1 | chr18_52556491-52556491_G_T  | 168Q>H | Substitution | Nonsynonymous coding | 13% |
| MM18T | RAB32    | RAB32, member RAS oncogene family                    | CCDS5210.1  | chr6_146870678-146870678_G_T | 110R>I | Substitution | Nonsynonymous coding | 13% |
| MM18T | RAB33A   | RAB33A, member RAS oncogene family                   | CCDS14621.1 | chrX_129306283-129306283_G_A | 83E>K  | Substitution | Nonsynonymous coding | 15% |
| MM18T | RAB3B    | RAB3B, member RAS oncogene family                    | CCDS560.1   | chr1_52399075-52399075_T_G   | 129Q>H | Substitution | Nonsynonymous coding | 11% |
| MM18T | RAB3C    | RAB3C, member RAS oncogene family                    | CCDS3976.1  | chr5_57913641-57913641_G_A   | 66D>N  | Substitution | Nonsynonymous coding | 13% |
| MM18T | RAB3GAP1 | RAB3 GTPase activating protein subunit 1 (catalytic) | CCDS33294.1 | chr2_135891480-135891480_A_C | 459K>T | Substitution | Nonsynonymous coding | 15% |
| MM18T | RAB40AL  | RAB40A, member RAS oncogene family-like              | CCDS35353.1 | chrX_102192487-102192487_C_T | 81R>C  | Substitution | Nonsynonymous coding | 12% |
| MM18T | RAB40B   | RAB40B, member RAS oncogene family                   | CCDS11816.1 | chr17_80616435-80616435_G_A  | 166S>L | Substitution | Nonsynonymous coding | 25% |
| MM18T | RAB8B    | RAB8B, member RAS oncogene family                    | CCDS10183.1 | chr15_63541885-63541885_C_T  | 76A>V  | Substitution | Nonsynonymous coding | 11% |
| MM18T | RABEP1   | rabaptin, RAB GTPase binding effector protein 1      | CCDS45592.1 | chr17_5266222-5266222_A_T    | 527N>Y | Substitution | Nonsynonymous coding | 13% |
| MM18T | RABEP1   | rabaptin, RAB GTPase binding effector protein 1      | CCDS45592.1 | chr17_5276723-5276723_G_T    | 667D>Y | Substitution | Nonsynonymous coding | 14% |
| MM18T | RABEP2   | rabaptin, RAB GTPase binding effector protein 2      | CCDS42140.1 | chr16_28931216-28931216_C_T  | 108R>Q | Substitution | Nonsynonymous coding | 17% |
| MM18T | RABGAP1  | RAB GTPase activating protein 1                      | CCDS6848.2  | chr9_125759569-125759569_C_T | 378S>L | Substitution | Nonsynonymous coding | 23% |
| MM18T | RABGGTA  | Rab geranylgeranyltransferase, alpha subunit         | CCDS45088.1 | chr14_24736029-24736029_G_A  | 474R>C | Substitution | Nonsynonymous coding | 16% |
| MM18T | RABGGTA  | Rab geranylgeranyltransferase, alpha subunit         | CCDS45088.1 | chr14_24738128-24738128_G_A  | 263R>W | Substitution | Nonsynonymous coding | 13% |
| MM18T | RABL3    | RAB, member of RAS oncogene family-like 3            | CCDS3001.1  | chr3_120408670-120408670_T_A | 237*>C | Substitution | Nonsynonymous coding | 17% |
| MM18T | RAD17    | RAD17 homolog (S. pombe)                             | CCDS4003.1  | chr5_68692376-68692376_A_    | NA     | Deletion     | Splice site donor    | 15% |
| MM18T | RAD21L1  | RAD21-like 1 (S. pombe)                              | CCDS46568.1 | chr20_1234995-1234995_T_G    | 522F>C | Substitution | Nonsynonymous coding | 18% |
| MM18T | RAD51AP2 | RAD51 associated protein 2                           | CCDS42656.1 | chr2_17696691-17696691_C_T   | 998E>K | Substitution | Nonsynonymous coding | 17% |
| MM18T | RAD51D   | RAD51 homolog D (S. cerevisiae)                      | CCDS45646.1 | chr17_33434083-33434083_A_G  | 155V>A | Substitution | Nonsynonymous coding | 17% |
| MM18T | RAD54L2  | RAD54-like 2 (S. cerevisiae)                         | CCDS33765.2 | chr3_51669620-51669620_C_A   | 385S>Y | Substitution | Nonsynonymous coding | 21% |

|       |         |                                                                   |                |                               |         |              |                      |     |
|-------|---------|-------------------------------------------------------------------|----------------|-------------------------------|---------|--------------|----------------------|-----|
| MM18T | RAD54L2 | RAD54-like 2 ( <i>S. cerevisiae</i> )                             | CCDS33765.2    | chr3_51697261-51697261_C_T    | 1410S>L | Substitution | Nonsynonymous coding | 11% |
| MM18T | RAD9B   | RAD9 homolog B ( <i>S. pombe</i> )                                | CCDS9148.2     | chr12_110957645-110957645_A_G | 272I>V  | Substitution | Nonsynonymous coding | 14% |
| MM18T | RAE1    | RAE1 RNA export 1 homolog ( <i>S. pombe</i> )                     | CCDS13458.1    | chr20_55948747-55948747_C_A   | 260H>N  | Substitution | Nonsynonymous coding | 11% |
| MM18T | RAF1    | v-raf-1 murine leukemia viral oncogene homolog 1                  | CCDS2612.1     | chr3_12626383-12626383_A_G    | 589V>A  | Substitution | Nonsynonymous coding | 10% |
| MM18T | RAF1    | v-raf-1 murine leukemia viral oncogene homolog 1                  | CCDS2612.1     | chr3_12645777-12645777_C_A    | 231R>I  | Substitution | Nonsynonymous coding | 12% |
| MM18T | RAI14   | retinoic acid induced 14                                          | CCDS34142.1    | chr5_34824478-34824478_C_T    | 844S>F  | Substitution | Nonsynonymous coding | 12% |
| MM18T | RAI14   | retinoic acid induced 14                                          | CCDS34142.1    | chr5_34829885-34829885_C_A    | 950L>I  | Substitution | Nonsynonymous coding | 11% |
| MM18T | RANBP2  | RAN binding protein 2                                             | CCDS2079.1     | chr2_109380588-109380588_G_A  | 1198R>H | Substitution | Nonsynonymous coding | 15% |
| MM18T | RAP2C   | RAP2C, member of RAS oncogene family                              | CCDS14632.1    | chrX_131348204-131348204_C_T  | 182V>I  | Substitution | Nonsynonymous coding | 10% |
| MM18T | RAPGEF2 | Rap guanine nucleotide exchange factor (GEF) 2                    | CCDS43277.1    | chr4_160189358-160189358_G_T  | 17E>D   | Substitution | Nonsynonymous coding | 11% |
| MM18T | RAPGEF2 | Rap guanine nucleotide exchange factor (GEF) 2                    | CCDS43277.1    | chr4_160271321-160271321_C_A  | 1088L>I | Substitution | Nonsynonymous coding | 15% |
| MM18T | RAPGEF3 | Rap guanine nucleotide exchange factor (GEF) 3                    | CCDS41775.1    | chr12_48143312-48143312_A_G   | 301V>A  | Substitution | Nonsynonymous coding | 13% |
| MM18T | RAPGEF4 | Rap guanine nucleotide exchange factor (GEF) 4                    | CCDS42775.1    | chr2_173850215-173850215_A_G  | 382T>A  | Substitution | Nonsynonymous coding | 13% |
| MM18T | RAPGEF4 | Rap guanine nucleotide exchange factor (GEF) 4                    | CCDS42775.1    | chr2_173891894-173891894_A_C  | 822E>A  | Substitution | Nonsynonymous coding | 11% |
| MM18T | RAPGEF5 | Rap guanine nucleotide exchange factor (GEF) 5                    | ENST0000344041 | chr7_22190132-22190133_AA_    | NA      | Deletion     | Splice site acceptor | 11% |
| MM18T | RAPGEF5 | Rap guanine nucleotide exchange factor (GEF) 5                    | ENST0000344041 | chr7_22190132-22190132_A_     | NA      | Deletion     | Splice site acceptor | 14% |
| MM18T | RAPGEF5 | Rap guanine nucleotide exchange factor (GEF) 5                    | NM_012294      | chr7_22330863-22330863_A_     | NA      | Deletion     | Splice site acceptor | 12% |
| MM18T | RARRES2 | retinoic acid receptor responder (tazarotene induced) 2           | CCDS5902.1     | chr7_150036090-150036090_C_A  | 120E>D  | Substitution | Nonsynonymous coding | 15% |
| MM18T | RASA1   | RAS p21 protein activator (GTPase activating protein) 1           | CCDS34200.1    | chr5_86564461-86564461_G_A    | 65A>T   | Substitution | Nonsynonymous coding | 21% |
| MM18T | RASA2   | RAS p21 protein activator 2                                       | CCDS3117.1     | chr3_141305547-141305547_G_A  | 629R>Q  | Substitution | Nonsynonymous coding | 14% |
| MM18T | RASA3   | RAS p21 protein activator 3                                       | CCDS32016.1    | chr13_114817554-114817554_C_A | 84D>Y   | Substitution | Nonsynonymous coding | 12% |
| MM18T | RASAL3  | RAS protein activator like 3                                      | CCDS46006.1    | chr19_15569159-15569159_G_A   | 290R>C  | Substitution | Nonsynonymous coding | 16% |
| MM18T | RASD2   | RASD family, member 2                                             | CCDS13916.1    | chr22_35947597-35947597_G_A   | 107D>N  | Substitution | Nonsynonymous coding | 10% |
| MM18T | RASD2   | RASD family, member 2                                             | CCDS13916.1    | chr22_35947936-35947936_C_T   | 220R>C  | Substitution | Nonsynonymous coding | 16% |
| MM18T | RASEF   | RAS and EF-hand domain containing                                 | CCDS6662.1     | chr9_85611950-85611950_G_A    | 633R>X  | Substitution | Nonsense             | 26% |
| MM18T | RASGRF1 | Ras protein-specific guanine nucleotide-releasing factor 1        | CCDS10309.1    | chr15_79298739-79298739_G_A   | 635R>C  | Substitution | Nonsynonymous coding | 14% |
| MM18T | RASGRP2 | RAS guanyl releasing protein 2 (calcium and DAG-regulated)        | CCDS31598.1    | chr11_64506841-64506841_C_A   | 268E>D  | Substitution | Nonsynonymous coding | 12% |
| MM18T | RASGRP3 | RAS guanyl releasing protein 3 (calcium and DAG-regulated)        | CCDS46256.1    | chr2_33749616-33749616_G_A    | ISV+1>  | Substitution | Splice site donor    | 17% |
| MM18T | RASL10A | RAS-like, family 10, member A                                     | CCDS13854.1    | chr22_29709541-29709541_C_T   | 121E>K  | Substitution | Nonsynonymous coding | 30% |
| MM18T | RASL10B | RAS-like, family 10, member B                                     | CCDS11297.1    | chr17_34068281-34068281_G_A   | 190R>H  | Substitution | Nonsynonymous coding | 13% |
| MM18T | RASSF3  | Ras association (RalGDS/AF-6) domain family member 3              | CCDS8969.1     | chr12_65088602-65088602_A_C   | 209E>D  | Substitution | Nonsynonymous coding | 10% |
| MM18T | RASSF9  | Ras association (RalGDS/AF-6) domain family (N-terminal) member 9 | CCDS44950.1    | chr12_86229978-86229978_A_G   | 1M>T    | Substitution | Nonsynonymous coding | 17% |

|       |        |                                                                                       |                 |                              |         |              |                      |     |
|-------|--------|---------------------------------------------------------------------------------------|-----------------|------------------------------|---------|--------------|----------------------|-----|
| MM18T | RBBP7  | retinoblastoma binding protein 7                                                      | CCDS14179.1     | chrX_16870966-16870966_G_A   | 264P>L  | Substitution | Nonsynonymous coding | 13% |
| MM18T | RBBP8  | retinoblastoma binding protein 8                                                      | CCDS11875.1     | chr18_20596806-20596806_A_C  | 791Q>H  | Substitution | Nonsynonymous coding | 11% |
| MM18T | RBM10  | RNA binding motif protein 10                                                          | CCDS14274.1     | chrX_47041149-47041149_C_T   | 526S>L  | Substitution | Nonsynonymous coding | 14% |
| MM18T | RBM10  | RNA binding motif protein 10                                                          | CCDS14274.1     | chrX_47044758-47044758_G_A   | 720D>N  | Substitution | Nonsynonymous coding | 18% |
| MM18T | RBM10  | RNA binding motif protein 10                                                          | CCDS14274.1     | chrX_47044762-47044762_G_A   | 721R>H  | Substitution | Nonsynonymous coding | 11% |
| MM18T | RBM11  | RNA binding motif protein 11                                                          | CCDS46635.1     | chr21_15591972-15591972_C_T  | 62S>L   | Substitution | Nonsynonymous coding | 14% |
| MM18T | RBM15  | RNA binding motif protein 15                                                          | CCDS822.1       | chr1_110884853-110884853_A_C | 942K>N  | Substitution | Nonsynonymous coding | 13% |
| MM18T | RBM27  | RNA binding motif protein 27                                                          | CCDS43378.1     | chr5_145650586-145650586_G_T | 921E>X  | Substitution | Nonsense             | 11% |
| MM18T | RBM33  | RNA binding motif protein 33                                                          | ENST00000392759 | chr7_155477681-155477681_G_T | 208D>Y  | Substitution | Nonsynonymous coding | 10% |
| MM18T | RBM39  | RNA binding motif protein 39                                                          | CCDS13266.1     | chr20_34320032-34320032_G_A  | 43R>C   | Substitution | Nonsynonymous coding | 13% |
| MM18T | RBM4   | RNA binding motif protein 4                                                           | CCDS8147.1      | chr11_66384398-66384398_G_T  | 69E>D   | Substitution | Nonsynonymous coding | 20% |
| MM18T | RBM4   | RNA binding motif protein 4                                                           | CCDS8147.1      | chr11_66392816-66392816_C_T  | 490S>L  | Substitution | Nonsynonymous coding | 16% |
| MM18T | RBM42  | RNA binding motif protein 42                                                          | CCDS12468.1     | chr19_36125221-36125221_C_T  | 361R>C  | Substitution | Nonsynonymous coding | 16% |
| MM18T | RBM42  | RNA binding motif protein 42                                                          | CCDS12468.1     | chr19_36128063-36128063_A_G  | 380D>G  | Substitution | Nonsynonymous coding | 11% |
| MM18T | RBM44  | RNA binding motif protein 44                                                          | CCDS46554.1     | chr2_238725784-238725784_G_A | 75M>I   | Substitution | Nonsynonymous coding | 15% |
| MM18T | RBM48  | RNA binding motif protein 48                                                          | CCDS43615.1     | chr7_92164000-92164000_C_T   | 245R>W  | Substitution | Nonsynonymous coding | 11% |
| MM18T | RBMXL2 | RNA binding motif protein, X-linked-like 2                                            | CCDS7777.1      | chr11_7110547-7110547_G_A    | 66A>T   | Substitution | Nonsynonymous coding | 10% |
| MM18T | RBMXL3 | RNA binding motif protein, X-linked-like 3                                            | NM_001145346    | chrX_114425680-114425680_C_T | 559S>L  | Substitution | Nonsynonymous coding | 13% |
| MM18T | RBMXL3 | RNA binding motif protein, X-linked-like 3                                            | NM_001145346    | chrX_114426603-114426603_C_T | 867R>C  | Substitution | Nonsynonymous coding | 15% |
| MM18T | RBP3   | retinol binding protein 3, interstitial                                               | CCDS7218.1      | chr10_48381965-48381965_C_A  | 1228E>D | Substitution | Nonsynonymous coding | 21% |
| MM18T | RBP3   | retinol binding protein 3, interstitial                                               | CCDS7218.1      | chr10_48389916-48389916_G_T  | 321T>N  | Substitution | Nonsynonymous coding | 17% |
| MM18T | RBP3   | retinol binding protein 3, interstitial                                               | CCDS7218.1      | chr10_48390672-48390672_G_A  | 69T>M   | Substitution | Nonsynonymous coding | 15% |
| MM18T | RBPJL  | recombination signal binding protein for immunoglobulin kappa J region-like           | CCDS13349.1     | chr20_43945531-43945531_G_A  | 496D>N  | Substitution | Nonsynonymous coding | 10% |
| MM18T | RBX1   | ring-box 1, E3 ubiquitin protein ligase                                               | CCDS14009.1     | chr22_41363870-41363870_G_T  | 99R>I   | Substitution | Nonsynonymous coding | 11% |
| MM18T | RCAN2  | regulator of calcineurin 2                                                            | CCDS43469.1     | chr6_46191006-46191006_A_G   | 156S>P  | Substitution | Nonsynonymous coding | 16% |
| MM18T | RCBTB1 | regulator of chromosome condensation (RCC1) and BTB (POZ) domain containing protein 1 | CCDS9418.1      | chr13_50129735-50129735_T_G  | 173K>N  | Substitution | Nonsynonymous coding | 11% |
| MM18T | RCE1   | RCE1 homolog, prenyl protein protease (S. cerevisiae)                                 | CCDS8151.1      | chr11_66612348-66612348_T_C  | 154S>P  | Substitution | Nonsynonymous coding | 12% |
| MM18T | RCL1   | RNA terminal phosphate cyclase-like 1                                                 | CCDS6456.1      | chr9_4793193-4793193_G_T     | 34K>N   | Substitution | Nonsynonymous coding | 11% |
| MM18T | RDH13  | retinol dehydrogenase 13 (all-trans/9-cis) [Source:HGNC Symbol;Acc:19978]             | CCDS42627.1     | chr19_55560054-55560054_C_T  | 69E>K   | Substitution | Nonsynonymous coding | 14% |
| MM18T | RDH16  | retinol dehydrogenase 16 (all-trans)                                                  | CCDS41797.1     | chr12_57346629-57346629_C_T  | 240E>K  | Substitution | Nonsynonymous coding | 18% |
| MM18T | REC8   | REC8 homolog (yeast)                                                                  | CCDS41932.1     | chr14_24647365-24647365_G_T  | 310E>D  | Substitution | Nonsynonymous coding | 11% |
| MM18T | RECQL  | RecQ protein-like (DNA helicase Q1-like)                                              | CCDS31756.1     | chr12_21624408-21624408_C_A  | 541D>Y  | Substitution | Nonsynonymous coding | 10% |

|       |        |                                                               |                 |                               |         |              |                      |     |
|-------|--------|---------------------------------------------------------------|-----------------|-------------------------------|---------|--------------|----------------------|-----|
| MM18T | RECQL  | RecQ protein-like (DNA helicase Q1-like)                      | CCDS31756.1     | chr12_21644463-21644463_C_T   | 68W>X   | Substitution | Nonsense             | 14% |
| MM18T | RECQL5 | RecQ protein-like 5                                           | CCDS42380.1     | chr17_73627573-73627573_C_T   | 469E>K  | Substitution | Nonsynonymous coding | 14% |
| MM18T | REEP6  | receptor accessory protein 6                                  | ENST00000395484 | chr19_1497342-1497342_G_A     | 297A>T  | Substitution | Nonsynonymous coding | 11% |
| MM18T | RELA   | v-rel reticuloendotheliosis viral oncogene homolog A (avian)  | CCDS31609.1     | chr11_65423401-65423401_G_A   | 295R>C  | Substitution | Nonsynonymous coding | 10% |
| MM18T | RELN   | reelin                                                        | CCDS47680.1     | chr7_103179717-103179717_G_T  | 2330L>I | Substitution | Nonsynonymous coding | 13% |
| MM18T | RELN   | reelin                                                        | CCDS47680.1     | chr7_103183260-103183260_G_T  | 2197L>I | Substitution | Nonsynonymous coding | 13% |
| MM18T | RENBP  | renin binding protein                                         | CCDS14738.2     | chrX_153208354-153208354_C_T  | 214A>T  | Substitution | Nonsynonymous coding | 10% |
| MM18T | REPIN1 | replication initiator 1                                       | CCDS47745.1     | chr7_150068785-150068785_G_T  | 209R>I  | Substitution | Nonsynonymous coding | 15% |
| MM18T | REPS1  | RALBP1 associated Eps domain containing 1                     | CCDS5193.2      | chr6_139229911-139229911_G_A  | 703R>X  | Substitution | Nonsense             | 18% |
| MM18T | REPS2  | RALBP1 associated Eps domain containing 2                     | CCDS14180.2     | chrX_16965245-16965245_G_T    | 87E>D   | Substitution | Nonsynonymous coding | 17% |
| MM18T | REV3L  | REV3-like, polymerase (DNA directed), zeta, catalytic subunit | CCDS5091.2      | chr6_111688711-111688711_G_T  | 2094L>M | Substitution | Nonsynonymous coding | 12% |
| MM18T | REV3L  | REV3-like, polymerase (DNA directed), zeta, catalytic subunit | CCDS5091.2      | chr6_111689092-111689092_A_G  | 1967S>P | Substitution | Nonsynonymous coding | 12% |
| MM18T | REV3L  | REV3-like, polymerase (DNA directed), zeta, catalytic subunit | CCDS5091.2      | chr6_111695080-111695080_G_A  | 1493P>L | Substitution | Nonsynonymous coding | 16% |
| MM18T | REXO2  | REX2, RNA exonuclease 2 homolog (S. cerevisiae)               | CCDS8371.1      | chr11_114316791-114316791_C_A | 171T>N  | Substitution | Nonsynonymous coding | 12% |
| MM18T | RFC5   | replication factor C (activator 1) 5, 36.5kDa                 | CCDS9185.1      | chr12_118467596-118467596_C_T | 298R>X  | Substitution | Nonsense             | 12% |
| MM18T | RFNG   | RFNG O-fucosylpeptide 3-beta-N-acetylglucosaminyltransferase  | CCDS32773.1     | chr17_80006670-80006670_G_T   | 310H>N  | Substitution | Nonsynonymous coding | 10% |
| MM18T | RFX3   | regulatory factor X, 3 (influences HLA class II expression)   | CCDS6449.1      | chr9_3293119-3293119_C_A      | 230R>I  | Substitution | Nonsynonymous coding | 17% |
| MM18T | RFX6   | regulatory factor X, 6                                        | CCDS5113.1      | chr6_117199036-117199036_G_A  | 101D>N  | Substitution | Nonsynonymous coding | 14% |
| MM18T | RGAG1  | retrotransposon gag domain containing 1                       | NM_020769       | chrX_109694043-109694043_G_T  | 66M>I   | Substitution | Nonsynonymous coding | 13% |
| MM18T | RGAG1  | retrotransposon gag domain containing 1                       | NM_020769       | chrX_109696961-109696961_C_T  | 1039S>L | Substitution | Nonsynonymous coding | 12% |
| MM18T | RGAG1  | retrotransposon gag domain containing 1                       | NM_020769       | chrX_109697686-109697686_G_A  | 1281A>T | Substitution | Nonsynonymous coding | 11% |
| MM18T | RGN    | regucalcin (senescence marker protein-30)                     | CCDS14272.1     | chrX_46951552-46951552_G_A    | 263A>T  | Substitution | Nonsynonymous coding | 12% |
| MM18T | RGS12  | regulator of G-protein signaling 12                           | CCDS3366.1      | chr4_3318826-3318826_G_A      | 310R>Q  | Substitution | Nonsynonymous coding | 20% |
| MM18T | RGS12  | regulator of G-protein signaling 12                           | CCDS3366.1      | chr4_3319443-3319443_A_G      | 516R>G  | Substitution | Nonsynonymous coding | 11% |
| MM18T | RGS16  | regulator of G-protein signaling 16                           | CCDS1348.1      | chr1_182569627-182569627_G_A  | 137H>Y  | Substitution | Nonsynonymous coding | 26% |
| MM18T | RGS22  | regulator of G-protein signaling 22                           | CCDS43758.1     | chr8_101059818-101059818_C_T  | 566E>K  | Substitution | Nonsynonymous coding | 14% |
| MM18T | RGS22  | regulator of G-protein signaling 22                           | CCDS43758.1     | chr8_101051155-101051155_G_A  | ISV+4>  | Substitution | Splice site donor    | 13% |
| MM18T | RGS6   | regulator of G-protein signaling 6                            | ENST00000404301 | chr14_73006768-73006768_G_A   | 463R>H  | Substitution | Nonsynonymous coding | 18% |
| MM18T | RGS9   | regulator of G-protein signaling 9                            | CCDS42373.1     | chr17_63221580-63221580_G_A   | 623R>Q  | Substitution | Nonsynonymous coding | 15% |
| MM18T | RHBDF1 | rhomboid 5 homolog 1 (Drosophila)                             | CCDS32344.1     | chr16_108362-108362_C_T       | 849E>K  | Substitution | Nonsynonymous coding | 16% |
| MM18T | RHBDL2 | rhomboid, veinlet-like 2 (Drosophila)                         | CCDS30680.1     | chr1_39384828-39384828_C_A    | 19E>D   | Substitution | Nonsynonymous coding | 14% |
| MM18T | RHO    | rhodopsin                                                     | CCDS3063.1      | chr3_129249757-129249757_G_A  | 134E>K  | Substitution | Nonsynonymous coding | 13% |

|       |          |                                                                     |                 |                               |         |              |                      |     |
|-------|----------|---------------------------------------------------------------------|-----------------|-------------------------------|---------|--------------|----------------------|-----|
| MM18T | RHOBTB3  | Rho-related BTB domain containing 3                                 | CCDS4077.1      | chr5_95072734-95072734_A_C    | 124N>H  | Substitution | Nonsynonymous coding | 11% |
| MM18T | RHOXF1   | Rhox homeobox family, member 1                                      | CCDS14593.1     | chrX_119243176-119243176_C_T  | 177D>N  | Substitution | Nonsynonymous coding | 12% |
| MM18T | RHPN1    | rhophilin, Rho GTPase binding protein 1                             | CCDS47927.1     | chr8_144461146-144461146_C_A  | 217L>I  | Substitution | Nonsynonymous coding | 19% |
| MM18T | RIC8B    | resistance to inhibitors of cholinesterase 8 homolog B (C. elegans) | CCDS9109.2      | chr12_107245360-107245360_T_G | 432C>G  | Substitution | Nonsynonymous coding | 17% |
| MM18T | RIF1     | RAP1 interacting factor homolog (yeast)                             | CCDS2194.1      | chr2_152293860-152293860_C_T  | 493A>V  | Substitution | Nonsynonymous coding | 12% |
| MM18T | RIMBP2   | RIMS binding protein 2                                              | CCDS31925.1     | chr12_130892290-130892290_G_A | 969S>L  | Substitution | Nonsynonymous coding | 15% |
| MM18T | RIMKLA   | ribosomal modification protein rimK-like family member A            | CCDS466.2       | chr1_42880599-42880599_G_T    | 377G>V  | Substitution | Nonsynonymous coding | 11% |
| MM18T | RIMS1    | regulating synaptic membrane exocytosis 1                           | CCDS47449.1     | chr6_73110224-73110224_A_C    | 1629R>S | Substitution | Nonsynonymous coding | 14% |
| MM18T | RIMS2    | regulating synaptic membrane exocytosis 2                           | ENST00000436393 | chr8_105161049-105161049_C_T  | 163R>C  | Substitution | Nonsynonymous coding | 13% |
| MM18T | RIMS2    | regulating synaptic membrane exocytosis 2                           | ENST00000436393 | chr8_105105702-105105702_C_T  | 35R>X   | Substitution | Nonsense             | 17% |
| MM18T | RING1    | ring finger protein 1                                               | CCDS34424.1     | chr6_33179128-33179128_G_A    | 217G>R  | Substitution | Nonsynonymous coding | 27% |
| MM18T | RINL     | Ras and Rab interactor-like                                         | CCDS12522.1     | chr19_39359952-39359952_G_A   | 411R>C  | Substitution | Nonsynonymous coding | 17% |
| MM18T | RLBP1    | retinaldehyde binding protein 1                                     | CCDS32324.1     | chr15_89760357-89760357_G_T   | 114L>I  | Substitution | Nonsynonymous coding | 12% |
| MM18T | RLF      | rearranged L-myc fusion                                             | CCDS448.1       | chr1_40704570-40704570_C_T    | 1399S>F | Substitution | Nonsynonymous coding | 13% |
| MM18T | RMDN1    | regulator of microtubule dynamics 1                                 | CCDS34918.1     | chr8_87520819-87520819_G_T    | 11L>M   | Substitution | Nonsynonymous coding | 20% |
| MM18T | RMDN2    | regulator of microtubule dynamics 2                                 | CCDS1792.1      | chr2_38231324-38231324_A_G    | 560N>D  | Substitution | Nonsynonymous coding | 14% |
| MM18T | RMDN2    | regulator of microtubule dynamics 2                                 | ENST00000425641 | chr2_38244721-38244721_A_G    | 145T>A  | Substitution | Nonsynonymous coding | 20% |
| MM18T | RNASE11  | ribonuclease, RNase A family, 11 (non-active)                       | CCDS9553.1      | chr14_21052582-21052582_C_T   | 18A>T   | Substitution | Nonsynonymous coding | 13% |
| MM18T | RNASEH2B | ribonuclease H2, subunit B                                          | CCDS9425.1      | chr13_51528104-51528104_G_T   | 269D>Y  | Substitution | Nonsynonymous coding | 14% |
| MM18T | RNASEL   | ribonuclease L (2',5'-oligoadenylate synthetase-dependent)          | CCDS1347.1      | chr1_182550481-182550481_G_A  | 595T>M  | Substitution | Nonsynonymous coding | 12% |
| MM18T | RNF111   | ring finger protein 111                                             | CCDS10169.1     | chr15_59373276-59373276_C_A   | 697S>Y  | Substitution | Nonsynonymous coding | 15% |
| MM18T | RNF128   | ring finger protein 128, E3 ubiquitin protein ligase                | CCDS14521.1     | chrX_106016352-106016352_C_T  | 232R>X  | Substitution | Nonsense             | 13% |
| MM18T | RNF146   | ring finger protein 146                                             | CCDS5136.1      | chr6_127608090-127608090_G_T  | 110R>I  | Substitution | Nonsynonymous coding | 12% |
| MM18T | RNF150   | ring finger protein 150                                             | CCDS34065.1     | chr4_142053635-142053635_C_T  | 110A>T  | Substitution | Nonsynonymous coding | 14% |
| MM18T | RNF165   | ring finger protein 165                                             | CCDS32823.1     | chr18_44035941-44035941_G_T   | 274R>I  | Substitution | Nonsynonymous coding | 12% |
| MM18T | RNF165   | ring finger protein 165                                             | CCDS32823.1     | chr18_44036591-44036591_G_A   | 345D>N  | Substitution | Nonsynonymous coding | 16% |
| MM18T | RNF166   | ring finger protein 166                                             | NM_178841       | chr16_88766062-88766062_C_T   | 131V>I  | Substitution | Nonsynonymous coding | 14% |
| MM18T | RNF167   | ring finger protein 167                                             | CCDS11060.1     | chr17_4846229-4846229_G_A     | 155E>K  | Substitution | Nonsynonymous coding | 15% |
| MM18T | RNF169   | ring finger protein 169                                             | CCDS41691.1     | chr11_74547657-74547657_G_A   | 670R>Q  | Substitution | Nonsynonymous coding | 14% |
| MM18T | RNF17    | ring finger protein 17                                              | CCDS9308.2      | chr13_25404693-25404693_G_T   | 773D>Y  | Substitution | Nonsynonymous coding | 14% |
| MM18T | RNF181   | ring finger protein 181                                             | CCDS1981.1      | chr2_85823735-85823735_G_T    | 60E>D   | Substitution | Nonsynonymous coding | 11% |
| MM18T | RNF20    | ring finger protein 20, E3 ubiquitin protein ligase                 | CCDS35084.1     | chr9_104309223-104309223_G_A  | 290R>Q  | Substitution | Nonsynonymous coding | 19% |



|       |               |                                                                                            |                 |                               |         |              |                      |     |
|-------|---------------|--------------------------------------------------------------------------------------------|-----------------|-------------------------------|---------|--------------|----------------------|-----|
| MM18T | RNF212        | ring finger protein 212                                                                    | ENST0000033673  | chr4_1087413-1087413_C_A      | 212K>N  | Substitution | Nonsynonymous coding | 11% |
| MM18T | RNF219        | ring finger protein 219                                                                    | CCDS31997.1     | chr13_79189915-79189915_G_A   | 661R>X  | Substitution | Nonsense             | 14% |
| MM18T | RNF6          | ring finger protein (C3H2C3 type) 6                                                        | CCDS9316.1      | chr13_26789090-26789090_C_T   | 310R>Q  | Substitution | Nonsynonymous coding | 11% |
| MM18T | RNFT2         | ring finger protein, transmembrane 2                                                       | ENST00000319176 | chr12_117289675-117289675_C_A | 298L>I  | Substitution | Nonsynonymous coding | 11% |
| MM18T | ROBO2         | roundabout, axon guidance receptor, homolog 2 (Drosophila)                                 | CCDS43109.1     | chr3_77614262-77614262_C_T    | 614R>C  | Substitution | Nonsynonymous coding | 10% |
| MM18T | ROBO2         | roundabout, axon guidance receptor, homolog 2 (Drosophila)                                 | CCDS43109.1     | chr3_77651594-77651594_C_A    | 1030L>M | Substitution | Nonsynonymous coding | 16% |
| MM18T | ROBO2         | roundabout, axon guidance receptor, homolog 2 (Drosophila)                                 | CCDS43109.1     | chr3_77147467-77147467_C_T    | 122R>X  | Substitution | Nonsense             | 16% |
| MM18T | ROBO3         | roundabout, axon guidance receptor, homolog 3 (Drosophila)                                 | CCDS44755.1     | chr11_124749787-124749787_G_A | 1301E>K | Substitution | Nonsynonymous coding | 14% |
| MM18T | ROCK2         | Rho-associated, coiled-coil containing protein kinase 2                                    | CCDS42654.1     | chr2_11347904-11347904_G_T    | 833H>N  | Substitution | Nonsynonymous coding | 11% |
| MM18T | ROCK2         | Rho-associated, coiled-coil containing protein kinase 2                                    | CCDS42654.1     | chr2_11362212-11362212_C_A    | 366E>X  | Substitution | Nonsense             | 13% |
| MM18T | ROS1          | c-ros oncogene 1 , receptor tyrosine kinase                                                | CCDS5116.1      | chr6_117609954-117609954_C_T  | 2249D>N | Substitution | Nonsynonymous coding | 12% |
| MM18T | ROS1          | c-ros oncogene 1 , receptor tyrosine kinase                                                | CCDS5116.1      | chr6_117737447-117737447_C_A  | 68D>Y   | Substitution | Nonsynonymous coding | 13% |
| MM18T | RP1           | retinitis pigmentosa 1 (autosomal dominant)                                                | CCDS6160.1      | chr8_55533774-55533774_T_C    | 83I>T   | Substitution | Nonsynonymous coding | 19% |
| MM18T | RP1           | retinitis pigmentosa 1 (autosomal dominant)                                                | CCDS6160.1      | chr8_55537967-55537967_T_C    | 509S>P  | Substitution | Nonsynonymous coding | 14% |
| MM18T | RP11-108K14.4 | Putative scavenger receptor cysteine-rich domain-containing protein LOC619207              | ENST0000033815  | chr10_135279862-135279862_G_A | 928R>Q  | Substitution | Nonsynonymous coding | 15% |
| MM18T | RP11-121M22.1 | -                                                                                          | ENST00000318117 | chr11_130271715-130271715_G_T | 79Q>H   | Substitution | Nonsynonymous coding | 14% |
| MM18T | RP11-219G17.4 | -                                                                                          | ENST00000374945 | chr17_76267446-76267446_G_A   | 190S>L  | Substitution | Nonsynonymous coding | 13% |
| MM18T | RP11-401P9.6  | -                                                                                          | ENST00000379963 | chr16_50640639-50640639_C_T   | 131A>T  | Substitution | Nonsynonymous coding | 19% |
| MM18T | RP11-477N12.3 | Putative germ cell-specific gene 1-like protein 2 [Source:UniProtKB/Swiss-Prot;Acc:A8MUP6] | ENST00000399363 | chr17_9705923-9705923_G_A     | 221S>L  | Substitution | Nonsynonymous coding | 12% |
| MM18T | RP11-723O4.6  | Uncharacterized protein FLJ43738 [Source:UniProtKB/Swiss-Prot;Acc:Q6ZUG5]                  | ENST00000344062 | chr3_128664373-128664373_C_A  | 146S>I  | Substitution | Nonsynonymous coding | 13% |
| MM18T | RP11-807H22.7 | -                                                                                          | ENST00000378140 | chr12_102301188-102301188_G_A | 37R>Q   | Substitution | Nonsynonymous coding | 13% |
| MM18T | RP11-863K10.7 | Uncharacterized protein [Source:UniProtKB/TrEMBL;Acc:B7WP66]                               | ENST00000330539 | chr8_37593487-37593487_A_     | NA      | Deletion     | Frameshift           | 14% |
| MM18T | RP1L1         | retinitis pigmentosa 1-like 1                                                              | CCDS43708.1     | chr8_10468582-10468582_G_A    | 1009A>V | Substitution | Nonsynonymous coding | 11% |
| MM18T | RP3-416J7.5   | -                                                                                          | ENST00000381078 | chr6_203567-203567_G_T        | 45E>D   | Substitution | Nonsynonymous coding | 15% |
| MM18T | RP3-416J7.5   | -                                                                                          | ENST00000381078 | chr6_203586-203586_C_A        | 52L>I   | Substitution | Nonsynonymous coding | 14% |
| MM18T | RPAP1         | RNA polymerase II associated protein 1                                                     | CCDS10079.1     | chr15_41817247-41817247_C_T   | 673E>K  | Substitution | Nonsynonymous coding | 12% |
| MM18T | RPAP2         | RNA polymerase II associated protein 2                                                     | CCDS740.1       | chr1_92789400-92789400_G_T    | 308R>I  | Substitution | Nonsynonymous coding | 14% |
| MM18T | RPAP3         | RNA polymerase II associated protein 3                                                     | CCDS8753.1      | chr12_48090161-48090161_T_G   | 148K>T  | Substitution | Nonsynonymous coding | 14% |
| MM18T | RPE65         | retinal pigment epithelium-specific protein 65kDa                                          | CCDS643.1       | chr1_68912480-68912480_C_T    | 53G>E   | Substitution | Nonsynonymous coding | 15% |
| MM18T | RPGRIPL1      | RPGRIPL1-like                                                                              | CCDS32447.1     | chr16_53730178-53730178_G_A   | 39R>C   | Substitution | Nonsynonymous coding | 12% |
| MM18T | RPL18A        | ribosomal protein L18a                                                                     | CCDS12367.1     | chr19_17974019-17974019_C_T   | 160R>C  | Substitution | Nonsynonymous coding | 12% |
| MM18T | RPP14         | ribonuclease P/MRP 14kDa subunit                                                           | CCDS2888.1      | chr3_58303171-58303171_C_A    | 108S>Y  | Substitution | Nonsynonymous coding | 12% |

|       |         |                                                                               |                 |                               |         |              |                      |     |
|-------|---------|-------------------------------------------------------------------------------|-----------------|-------------------------------|---------|--------------|----------------------|-----|
| MM18T | RPP21   | ribonuclease P/MRP 21kDa subunit                                              | CCDS4679.1      | chr6_30313115-30313115_C_T    | 33A>V   | Substitution | Nonsynonymous coding | 15% |
| MM18T | RPRD1A  | regulation of nuclear pre-mRNA domain containing 1A                           | ENST00000319040 | chr18_33605614-33605614_C_T   | 273D>N  | Substitution | Nonsynonymous coding | 14% |
| MM18T | RPS29   | ribosomal protein S29                                                         | CCDS9685.1      | chr14_50050397-50050397_A_    | NA      | Deletion     | Splice site acceptor | 15% |
| MM18T | RPS6    | ribosomal protein S6                                                          | CCDS6492.1      | chr9_19376371-19376371_G_A    | 224R>C  | Substitution | Nonsynonymous coding | 15% |
| MM18T | RPS6KA6 | ribosomal protein S6 kinase, 90kDa, polypeptide 6                             | CCDS14451.1     | chrX_83403051-83403051_T      | NA      | Insertion    | Frameshift           | 15% |
| MM18T | RPUSD1  | RNA pseudouridylylase domain containing 1                                     | CCDS10426.1     | chr16_837574-837574_T_C       | 55D>G   | Substitution | Nonsynonymous coding | 19% |
| MM18T | RPUSD2  | RNA pseudouridylylase domain containing 2                                     | CCDS10061.1     | chr15_40865978-40865978_G_A   | 386D>N  | Substitution | Nonsynonymous coding | 16% |
| MM18T | RRAGC   | Ras-related GTP binding C                                                     | CCDS430.1       | chr1_39322727-39322727_C_T    | 89E>K   | Substitution | Nonsynonymous coding | 12% |
| MM18T | RRBP1   | ribosome binding protein 1                                                    | CCDS13128.1     | chr20_17610530-17610530_C_T   | 463S>N  | Substitution | Nonsynonymous coding | 16% |
| MM18T | RRBP1   | ribosome binding protein 1                                                    | ENST00000246043 | chr20_17639880-17639880_C_T   | 425A>T  | Substitution | Nonsynonymous coding | 13% |
| MM18T | RREB1   | ras responsive element binding protein 1                                      | CCDS34335.1     | chr6_7230511-7230511_C_T      | 727R>C  | Substitution | Nonsynonymous coding | 16% |
| MM18T | RRH     | retinal pigment epithelium-derived rhodopsin homolog                          | CCDS3687.1      | chr4_110765276-110765276_A_G  | 313T>A  | Substitution | Nonsynonymous coding | 10% |
| MM18T | RRM2B   | ribonucleotide reductase M2 B (TP53 inducible)                                | CCDS34932.1     | chr8_103244511-103244511_C_T  | 24E>K   | Substitution | Nonsynonymous coding | 15% |
| MM18T | RRNAD1  | ribosomal RNA adenine dimethylase domain containing 1                         | CCDS1154.1      | chr1_156705540-156705540_G_A  | 382R>Q  | Substitution | Nonsynonymous coding | 16% |
| MM18T | RRP9    | ribosomal RNA processing 9, small subunit (SSU) processome component, homolog | CCDS2837.1      | chr3_51970525-51970525_C_A    | 188K>N  | Substitution | Nonsynonymous coding | 19% |
| MM18T | RS1     | retinoschisin 1                                                               | CCDS14187.1     | chrX_18662639-18662639_C_T    | 145D>N  | Substitution | Nonsynonymous coding | 11% |
| MM18T | RSBN1   | round spermatid basic protein 1                                               | CCDS862.1       | chr1_114310956-114310956_C_T  | 572E>K  | Substitution | Nonsynonymous coding | 11% |
| MM18T | RSC1A1  | regulatory solute carrier protein, family 1, member 1                         | CCDS161.1       | chr1_15987901-15987901_C_A    | 513S>Y  | Substitution | Nonsynonymous coding | 12% |
| MM18T | RSF1    | remodeling and spacing factor 1                                               | CCDS8253.1      | chr11_77409699-77409699_T_C   | 850T>A  | Substitution | Nonsynonymous coding | 17% |
| MM18T | RSF1    | remodeling and spacing factor 1                                               | CCDS8253.1      | chr11_77436734-77436734_C_T   | 197E>K  | Substitution | Nonsynonymous coding | 24% |
| MM18T | RSPH1   | radial spoke head 1 homolog (Chlamydomonas)                                   | CCDS13688.1     | chr21_43902752-43902752_C_A   | 190D>Y  | Substitution | Nonsynonymous coding | 13% |
| MM18T | RSPH3   | radial spoke 3 homolog (Chlamydomonas)                                        | CCDS5260.1      | chr6_159404737-159404737_G_A  | 292A>V  | Substitution | Nonsynonymous coding | 11% |
| MM18T | RSPH6A  | radial spoke head 6 homolog A (Chlamydomonas)                                 | CCDS12675.1     | chr19_46299276-46299276_A_C   | 669Y>D  | Substitution | Nonsynonymous coding | 22% |
| MM18T | RSPO3   | R-spondin 3                                                                   | CCDS5135.1      | chr6_127471657-127471657_C_T  | 126L>F  | Substitution | Nonsynonymous coding | 12% |
| MM18T | RSRC1   | arginine/serine-rich coiled-coil 1                                            | CCDS3181.1      | chr3_157841711-157841711_G_A  | 84R>Q   | Substitution | Nonsynonymous coding | 10% |
| MM18T | RSRC2   | arginine/serine-rich coiled-coil 2                                            | CCDS31920.1     | chr12_123001882-123001882_G_A | 165S>L  | Substitution | Nonsynonymous coding | 11% |
| MM18T | RTDR1   | rhabdoid tumor deletion region gene 1                                         | CCDS13803.1     | chr22_23481133-23481133_G_    | NA      | Deletion     | Splice site acceptor | 10% |
| MM18T | RTKN2   | rhotekin 2                                                                    | CCDS7263.1      | chr10_63976937-63976937_A_C   | 320F>L  | Substitution | Nonsynonymous coding | 14% |
| MM18T | RTKN2   | rhotekin 2                                                                    | CCDS7263.1      | chr10_64000948-64000948_C_T   | 108R>Q  | Substitution | Nonsynonymous coding | 34% |
| MM18T | RTL1    | retrotransposon-like 1                                                        | NM_001134888    | chr14_101348046-101348046_G_A | 1027S>L | Substitution | Nonsynonymous coding | 15% |
| MM18T | RTL1    | retrotransposon-like 1                                                        | NM_001134888    | chr14_101348948-101348948_G_T | 726F>L  | Substitution | Nonsynonymous coding | 13% |
| MM18T | RTN1    | reticulon 1                                                                   | CCDS9740.1      | chr14_60212801-60212801_C_T   | 214E>K  | Substitution | Nonsynonymous coding | 10% |

|       |         |                                                |             |                              |         |              |                      |     |
|-------|---------|------------------------------------------------|-------------|------------------------------|---------|--------------|----------------------|-----|
| MM18T | RTN4RL2 | reticulon 4 receptor-like 2                    | CCDS7957.1  | chr11_57243666-57243666_G_A  | 182S>N  | Substitution | Nonsynonymous coding | 11% |
| MM18T | RTP1    | receptor (chemosensory) transporter protein 1  | CCDS3287.2  | chr3_186917640-186917640_G_A | 192E>K  | Substitution | Nonsynonymous coding | 10% |
| MM18T | RTP2    | receptor (chemosensory) transporter protein 2  | CCDS33911.1 | chr3_187416533-187416533_C_T | 144R>H  | Substitution | Nonsynonymous coding | 16% |
| MM18T | RTTN    | rotatin                                        | CCDS42443.1 | chr18_67725024-67725024_C_T  | 1662R>K | Substitution | Nonsynonymous coding | 14% |
| MM18T | RUSC1   | RUN and SH3 domain containing 1                | CCDS41410.1 | chr1_155292099-155292099_G_A | 179D>N  | Substitution | Nonsynonymous coding | 21% |
| MM18T | RUSC2   | RUN and SH3 domain containing 2                | CCDS35008.1 | chr9_35548085-35548085_C_T   | 523R>C  | Substitution | Nonsynonymous coding | 17% |
| MM18T | RUVBL1  | RuvB-like 1 (E. coli)                          | CCDS3047.1  | chr3_127816161-127816161_C_T | 333R>Q  | Substitution | Nonsynonymous coding | 13% |
| MM18T | RUVBL1  | RuvB-like 1 (E. coli)                          | CCDS3047.1  | chr3_127816324-127816324_T_C | 279I>V  | Substitution | Nonsynonymous coding | 12% |
| MM18T | RUVBL1  | RuvB-like 1 (E. coli)                          | CCDS3047.1  | chr3_127820494-127820494_A_  | NA      | Deletion     | Splice site acceptor | 11% |
| MM18T | RXFP1   | relaxin/insulin-like family peptide receptor 1 | CCDS43276.1 | chr4_159566064-159566064_T_  | NA      | Deletion     | Frameshift           | 19% |
| MM18T | RYR1    | ryanodine receptor 1 (skeletal)                | CCDS33011.1 | chr19_38957035-38957035_C_T  | 1059P>S | Substitution | Nonsynonymous coding | 13% |
| MM18T | RYR1    | ryanodine receptor 1 (skeletal)                | CCDS33011.1 | chr19_38959613-38959613_G_A  | 1130R>H | Substitution | Nonsynonymous coding | 11% |
| MM18T | RYR1    | ryanodine receptor 1 (skeletal)                | CCDS33011.1 | chr19_38990452-38990452_G_A  | 2402R>Q | Substitution | Nonsynonymous coding | 17% |
| MM18T | RYR1    | ryanodine receptor 1 (skeletal)                | CCDS33011.1 | chr19_39008108-39008108_G_T  | 3265E>D | Substitution | Nonsynonymous coding | 13% |
| MM18T | RYR1    | ryanodine receptor 1 (skeletal)                | CCDS33011.1 | chr19_39076608-39076608_G_A  | 4945R>Q | Substitution | Nonsynonymous coding | 16% |
| MM18T | RYR2    | ryanodine receptor 2 (cardiac)                 | NM_001035   | chr1_237813286-237813286_A_G | 2541H>R | Substitution | Nonsynonymous coding | 17% |
| MM18T | RYR2    | ryanodine receptor 2 (cardiac)                 | NM_001035   | chr1_237886465-237886465_A_G | 3531Y>C | Substitution | Nonsynonymous coding | 13% |
| MM18T | RYR2    | ryanodine receptor 2 (cardiac)                 | NM_001035   | chr1_237947296-237947296_G_A | 4095G>D | Substitution | Nonsynonymous coding | 13% |
| MM18T | RYR3    | ryanodine receptor 3                           | CCDS45210.1 | chr15_33895530-33895530_A_G  | 710Y>C  | Substitution | Nonsynonymous coding | 13% |
| MM18T | RYR3    | ryanodine receptor 3                           | CCDS45210.1 | chr15_34030759-34030759_T_G  | 2542F>V | Substitution | Nonsynonymous coding | 13% |
| MM18T | RYR3    | ryanodine receptor 3                           | CCDS45210.1 | chr15_34064183-34064183_C_A  | 2960A>D | Substitution | Nonsynonymous coding | 15% |
| MM18T | RYR3    | ryanodine receptor 3                           | CCDS45210.1 | chr15_34118906-34118906_G_A  | 3733R>H | Substitution | Nonsynonymous coding | 17% |
| MM18T | S1PR3   | sphingosine-1-phosphate receptor 3             | CCDS6680.1  | chr9_91617032-91617032_G_A   | 306R>Q  | Substitution | Nonsynonymous coding | 22% |
| MM18T | S1PR5   | sphingosine-1-phosphate receptor 5             | CCDS12240.1 | chr19_10624519-10624519_G_T  | 390T>N  | Substitution | Nonsynonymous coding | 24% |
| MM18T | SACS    | spastic ataxia of Charlevoix-Saguenay (sacsin) | CCDS9300.2  | chr13_23912758-23912758_C_T  | 1753E>K | Substitution | Nonsynonymous coding | 10% |
| MM18T | SACS    | spastic ataxia of Charlevoix-Saguenay (sacsin) | CCDS9300.2  | chr13_23910337-23910337_C_A  | 2560E>X | Substitution | Nonsense             | 25% |
| MM18T | SACS    | spastic ataxia of Charlevoix-Saguenay (sacsin) | CCDS9300.2  | chr13_23985375-23985375_C_A  | 2E>X    | Substitution | Nonsense             | 11% |
| MM18T | SAG     | S-antigen; retina and pineal gland (arrestin)  | CCDS46545.1 | chr2_234229396-234229396_C_T | 101A>V  | Substitution | Nonsynonymous coding | 18% |
| MM18T | SALL3   | sal-like 3 (Drosophila)                        | CCDS12013.1 | chr18_76753601-76753601_C_T  | 537A>V  | Substitution | Nonsynonymous coding | 20% |
| MM18T | SALL3   | sal-like 3 (Drosophila)                        | CCDS12013.1 | chr18_76753762-76753762_C_T  | 591P>S  | Substitution | Nonsynonymous coding | 19% |
| MM18T | SALL3   | sal-like 3 (Drosophila)                        | CCDS12013.1 | chr18_76753807-76753807_G_A  | 606A>T  | Substitution | Nonsynonymous coding | 21% |
| MM18T | SALL3   | sal-like 3 (Drosophila)                        | CCDS12013.1 | chr18_76754515-76754515_G_A  | 842A>T  | Substitution | Nonsynonymous coding | 18% |

|       |        |                                                         |             |                               |         |              |                      |     |
|-------|--------|---------------------------------------------------------|-------------|-------------------------------|---------|--------------|----------------------|-----|
| MM18T | SALL4  | sal-like 4 (Drosophila)                                 | CCDS13438.1 | chr20_50408810-50408810_G_A   | 71T>M   | Substitution | Nonsynonymous coding | 13% |
| MM18T | SAMD3  | sterile alpha motif domain containing 3                 | CCDS34539.1 | chr6_130497032-130497032_G_T  | 259S>Y  | Substitution | Nonsynonymous coding | 11% |
| MM18T | SAMD9  | sterile alpha motif domain containing 9                 | CCDS34680.1 | chr7_92733781-92733781_G_T    | 544L>I  | Substitution | Nonsynonymous coding | 10% |
| MM18T | SAMD9L | sterile alpha motif domain containing 9-like            | CCDS34681.1 | chr7_92763836-92763836_C_A    | 483K>N  | Substitution | Nonsynonymous coding | 11% |
| MM18T | SAMD9L | sterile alpha motif domain containing 9-like            | CCDS34681.1 | chr7_92765025-92765025_G_A    | 87P>L   | Substitution | Nonsynonymous coding | 16% |
| MM18T | SAP130 | Sin3A-associated protein, 130kDa                        | CCDS2153.1  | chr2_128707808-128707808_T_C  | 857D>G  | Substitution | Nonsynonymous coding | 11% |
| MM18T | SART3  | squamous cell carcinoma antigen recognized by T cells 3 | CCDS9117.1  | chr12_108930488-108930488_T_G | 461E>D  | Substitution | Nonsynonymous coding | 10% |
| MM18T | SASH1  | SAM and SH3 domain containing 1                         | CCDS5212.1  | chr6_148808762-148808762_G_A  | 214E>K  | Substitution | Nonsynonymous coding | 13% |
| MM18T | SASH1  | SAM and SH3 domain containing 1                         | CCDS5212.1  | chr6_148835473-148835473_C_T  | 248S>L  | Substitution | Nonsynonymous coding | 13% |
| MM18T | SASH1  | SAM and SH3 domain containing 1                         | CCDS5212.1  | chr6_148865472-148865472_G_T  | 956E>X  | Substitution | Nonsense             | 15% |
| MM18T | SATB2  | SATB homeobox 2                                         | CCDS2327.1  | chr2_200213792-200213792_C_T  | 269E>K  | Substitution | Nonsynonymous coding | 13% |
| MM18T | SBF2   | SET binding factor 2                                    | CCDS31427.1 | chr11_10024183-10024183_G_T   | 225L>I  | Substitution | Nonsynonymous coding | 13% |
| MM18T | SCAF1  | SR-related CTD-associated factor 1                      | CCDS33074.1 | chr19_50156114-50156114_C_T   | 823S>L  | Substitution | Nonsynonymous coding | 17% |
| MM18T | SCAI   | suppressor of cancer cell invasion                      | CCDS43877.1 | chr9_127715225-127715225_C_T  | 584R>Q  | Substitution | Nonsynonymous coding | 15% |
| MM18T | SCAPER | S-phase cyclin A-associated protein in the ER           | NM_020843   | chr15_76673931-76673931_G_A   | 1165R>C | Substitution | Nonsynonymous coding | 12% |
| MM18T | SCD5   | stearoyl-CoA desaturase 5                               | CCDS34024.1 | chr4_83602034-83602034_C_A    | 132R>L  | Substitution | Nonsynonymous coding | 23% |
| MM18T | SCG5   | secretogranin V (7B2 protein)                           | CCDS45207.1 | chr15_32935963-32935963_G_A   | 57R>Q   | Substitution | Nonsynonymous coding | 11% |
| MM18T | SCGN   | secretagoin, EF-hand calcium binding protein            | CCDS4561.1  | chr6_25665246-25665246_G_A    | 108V>M  | Substitution | Nonsynonymous coding | 15% |
| MM18T | SCHIP1 | schwannomin interacting protein 1                       | CCDS3186.1  | chr3_159605510-159605510_C_A  | 337S>Y  | Substitution | Nonsynonymous coding | 11% |
| MM18T | SCIN   | scinderin                                               | CCDS47545.1 | chr7_12689102-12689102_T_G    | 631I>S  | Substitution | Nonsynonymous coding | 11% |
| MM18T | SCLT1  | sodium channel and clathrin linker 1                    | CCDS3740.1  | chr4_129880790-129880790_G_C  | 338Q>E  | Substitution | Nonsynonymous coding | 11% |
| MM18T | SCML2  | sex comb on midleg-like 2 (Drosophila)                  | CCDS14185.1 | chrX_18264905-18264905_C_A    | 538E>D  | Substitution | Nonsynonymous coding | 11% |
| MM18T | SCML4  | sex comb on midleg-like 4 (Drosophila)                  | CCDS5060.2  | chr6_108093495-108093495_G_A  | 13R>X   | Substitution | Nonsense             | 12% |
| MM18T | SCN10A | sodium channel, voltage-gated, type X, alpha subunit    | CCDS33736.1 | chr3_38755465-38755465_C_T    | 1263R>Q | Substitution | Nonsynonymous coding | 13% |
| MM18T | SCN1A  | sodium channel, voltage-gated, type I, alpha subunit    | CCDS33316.1 | chr2_166850736-166850736_T_G  | 1580K>T | Substitution | Nonsynonymous coding | 14% |
| MM18T | SCN3A  | sodium channel, voltage-gated, type III, alpha subunit  | CCDS33312.1 | chr2_166012376-166012376_G_A  | 357R>X  | Substitution | Nonsense             | 14% |
| MM18T | SCN4A  | sodium channel, voltage-gated, type IV, alpha subunit   | CCDS45761.1 | chr17_62019102-62019102_C_T   | 1514D>N | Substitution | Nonsynonymous coding | 16% |
| MM18T | SCN5A  | sodium channel, voltage-gated, type V, alpha subunit    | CCDS46796.1 | chr3_38655272-38655272_C_T    | 222R>Q  | Substitution | Nonsynonymous coding | 13% |
| MM18T | SCN5A  | sodium channel, voltage-gated, type V, alpha subunit    | CCDS46796.1 | chr3_38601709-38601709_C_A    | 1392E>X | Substitution | Nonsense             | 13% |
| MM18T | SCN7A  | sodium channel, voltage-gated, type VII, alpha subunit  | CCDS46442.1 | chr2_167330812-167330812_T_C  | 93N>D   | Substitution | Nonsynonymous coding | 13% |
| MM18T | SCN7A  | sodium channel, voltage-gated, type VII, alpha subunit  | CCDS46442.1 | chr2_167330833-167330833_T_C  | 86N>D   | Substitution | Nonsynonymous coding | 13% |
| MM18T | SCN9A  | sodium channel, voltage-gated, type IX, alpha subunit   | CCDS46441.1 | chr2_167162345-167162345_G_A  | 185R>C  | Substitution | Nonsynonymous coding | 10% |

|       |         |                                                                                        |             |                               |         |              |                      |     |
|-------|---------|----------------------------------------------------------------------------------------|-------------|-------------------------------|---------|--------------|----------------------|-----|
| MM18T | SCOC    | short coiled-coil protein                                                              | CCDS3750.1  | chr4_141302251-141302251_G_T  | 121R>I  | Substitution | Nonsynonymous coding | 17% |
| MM18T | SCRN1   | secernin 1                                                                             | CCDS47567.1 | chr7_29980307-29980307_T_G    | 264K>Q  | Substitution | Nonsynonymous coding | 24% |
| MM18T | SCRT1   | scratch homolog 1, zinc finger protein (Drosophila)                                    | CCDS6421.1  | chr8_145557734-145557734_C_T  | 54D>N   | Substitution | Nonsynonymous coding | 23% |
| MM18T | SCUBE1  | signal peptide, CUB domain, EGF-like 1                                                 | CCDS14048.1 | chr22_43604120-43604120_T_C   | 898N>D  | Substitution | Nonsynonymous coding | 11% |
| MM18T | SCUBE3  | signal peptide, CUB domain, EGF-like 3                                                 | CCDS4800.1  | chr6_35199603-35199603_G_A    | 146D>N  | Substitution | Nonsynonymous coding | 14% |
| MM18T | SCYL2   | SCY1-like 2 (S. cerevisiae)                                                            | CCDS9076.1  | chr12_100717401-100717401_A_C | 498Q>H  | Substitution | Nonsynonymous coding | 11% |
| MM18T | SDC4    | syndecan 4                                                                             | CCDS13350.1 | chr20_43955913-43955913_G_T   | 196F>L  | Substitution | Nonsynonymous coding | 11% |
| MM18T | SDCBP2  | syndecan binding protein (syntenin) 2                                                  | CCDS42848.1 | chr20_1293259-1293259_C_T     | 178D>N  | Substitution | Nonsynonymous coding | 14% |
| MM18T | SDK1    | sidekick cell adhesion molecule 1                                                      | CCDS34590.1 | chr7_4119091-4119091_C_A      | ISV-4>  | Substitution | Splice site acceptor | 12% |
| MM18T | SDK2    | sidekick cell adhesion molecule 2                                                      | CCDS45769.1 | chr17_71364660-71364660_C_T   | 1685V>M | Substitution | Nonsynonymous coding | 15% |
| MM18T | SDPR    | serum deprivation response                                                             | CCDS2313.1  | chr2_192700870-192700870_C_A  | 353E>X  | Substitution | Nonsense             | 10% |
| MM18T | SEBOX   | SEBOX homeobox                                                                         | CCDS11229.1 | chr17_26696360-26696360_C_T   | 207D>N  | Substitution | Nonsynonymous coding | 16% |
| MM18T | SEC11A  | SEC11 homolog A (S. cerevisiae)                                                        | CCDS45340.1 | chr15_85230991-85230991_G_T   | 59P>H   | Substitution | Nonsynonymous coding | 10% |
| MM18T | SEC13   | SEC13 homolog (S. cerevisiae)                                                          | CCDS2599.1  | chr3_10345850-10345850_G_A    | 239R>C  | Substitution | Nonsynonymous coding | 19% |
| MM18T | SEC14L1 | SEC14-like 1 (S. cerevisiae)                                                           | CCDS42385.1 | chr17_75205513-75205513_G_T   | 522E>D  | Substitution | Nonsynonymous coding | 17% |
| MM18T | SEC14L3 | SEC14-like 3 (S. cerevisiae)                                                           | CCDS13877.1 | chr22_30858152-30858152_A_C   | 231L>R  | Substitution | Nonsynonymous coding | 14% |
| MM18T | SEC16A  | SEC16 homolog A (S. cerevisiae)                                                        | NM_014866   | chr9_139341748-139341748_C_T  | 2210A>T | Substitution | Nonsynonymous coding | 22% |
| MM18T | SEC16A  | SEC16 homolog A (S. cerevisiae)                                                        | NM_014866   | chr9_139342595-139342595_G_A  | 2111R>C | Substitution | Nonsynonymous coding | 13% |
| MM18T | SEC16A  | SEC16 homolog A (S. cerevisiae)                                                        | NM_014866   | chr9_139350143-139350143_G_T  | 1923P>T | Substitution | Nonsynonymous coding | 25% |
| MM18T | SEC16B  | SEC16 homolog B (S. cerevisiae)                                                        | CCDS44281.1 | chr1_177915586-177915586_C_A  | 582D>Y  | Substitution | Nonsynonymous coding | 14% |
| MM18T | SEC22A  | SEC22 vesicle trafficking protein homolog A (S. cerevisiae)                            | CCDS3021.1  | chr3_122964814-122964814_G_T  | 204A>S  | Substitution | Nonsynonymous coding | 14% |
| MM18T | SEC24A  | SEC24 family, member A (S. cerevisiae)                                                 | CCDS43363.1 | chr5_134039572-134039572_A_C  | 797D>A  | Substitution | Nonsynonymous coding | 20% |
| MM18T | SEC24D  | SEC24 family, member D (S. cerevisiae)                                                 | CCDS3710.1  | chr4_119678935-119678935_C_A  | 454K>N  | Substitution | Nonsynonymous coding | 10% |
| MM18T | SEL1L   | sel-1 suppressor of lin-12-like (C. elegans)                                           | CCDS9876.1  | chr14_81953825-81953825_G_T   | 514S>Y  | Substitution | Nonsynonymous coding | 11% |
| MM18T | SEL1L   | sel-1 suppressor of lin-12-like (C. elegans)                                           | CCDS9876.1  | chr14_81961475-81961475_G_T   | 379L>I  | Substitution | Nonsynonymous coding | 12% |
| MM18T | SEL1L   | sel-1 suppressor of lin-12-like (C. elegans)                                           | CCDS9876.1  | chr14_81993239-81993239_A_C   | 60F>V   | Substitution | Nonsynonymous coding | 13% |
| MM18T | SEL1L3  | sel-1 suppressor of lin-12-like 3 (C. elegans)                                         | CCDS47037.1 | chr4_25849341-25849341_T_C    | 103Y>C  | Substitution | Nonsynonymous coding | 15% |
| MM18T | SELL    | selectin L                                                                             | NM_000655   | chr1_169673781-169673781_T_G  | 245N>H  | Substitution | Nonsynonymous coding | 11% |
| MM18T | SEMA3A  | sema domain, immunoglobulin domain (Ig), short basic domain, secreted, (semaphorin) 3A | CCDS5599.1  | chr7_83590806-83590806_G_A    | 733R>C  | Substitution | Nonsynonymous coding | 11% |
| MM18T | SEMA3C  | sema domain, immunoglobulin domain (Ig), short basic domain, secreted, (semaphorin) 3C | CCDS5596.1  | chr7_80374251-80374251_G_A    | 739R>W  | Substitution | Nonsynonymous coding | 11% |
| MM18T | SEMA3D  | sema domain, immunoglobulin domain (Ig), short basic domain, secreted, (semaphorin) 3D | CCDS34676.1 | chr7_84685170-84685170_T_G    | 242K>Q  | Substitution | Nonsynonymous coding | 15% |
| MM18T | SEMA3D  | sema domain, immunoglobulin domain (Ig), short basic domain, secreted, (semaphorin) 3D | CCDS34676.1 | chr7_84694841-84694841_G_A    | 206S>F  | Substitution | Nonsynonymous coding | 11% |

|       |           |                                                                                          |                 |                              |         |              |                      |     |
|-------|-----------|------------------------------------------------------------------------------------------|-----------------|------------------------------|---------|--------------|----------------------|-----|
| MM18T | SEMA3D    | sema domain, immunoglobulin domain (Ig), short basic domain, secreted, (semaphorin) 3D   | CCDS34676.1     | chr7_84751185-84751185_C_T   | 8R>K    | Substitution | Nonsynonymous coding | 12% |
| MM18T | SEMA4B    | sema domain, immunoglobulin domain (Ig), transmembrane domain (TM) and short             | CCDS45347.1     | chr15_90764945-90764945_A_T  | 270E>V  | Substitution | Nonsynonymous coding | 15% |
| MM18T | SEMA4B    | sema domain, immunoglobulin domain (Ig), transmembrane domain (TM) and short             | CCDS45347.1     | chr15_90768631-90768631_T_C  | ISV+2>  | Substitution | Splice site donor    | 29% |
| MM18T | SEMA4D    | sema domain, immunoglobulin domain (Ig), transmembrane domain (TM) and short             | CCDS6685.1      | chr9_91993696-91993696_C_T   | 838D>N  | Substitution | Nonsynonymous coding | 20% |
| MM18T | SEMA4D    | sema domain, immunoglobulin domain (Ig), transmembrane domain (TM) and short             | CCDS6685.1      | chr9_92017932-92017932_C_A   | ISV-1>  | Substitution | Splice site acceptor | 11% |
| MM18T | SEMA5A    | sema domain, seven thrombospondin repeats (type 1 and type 1-like), transmembrane        | CCDS3875.1      | chr5_9202258-9202258_G_T     | 247F>L  | Substitution | Nonsynonymous coding | 12% |
| MM18T | SEMA5B    | sema domain, seven thrombospondin repeats (type 1 and type 1-like), transmembrane        | CCDS35491.1     | chr3_122631827-122631827_G_A | 863S>L  | Substitution | Nonsynonymous coding | 15% |
| MM18T | SEMA7A    | semaphorin 7A, GPI membrane anchor (John Milton Hagen blood group)                       | CCDS10262.1     | chr15_74703165-74703165_C_T  | 601E>K  | Substitution | Nonsynonymous coding | 16% |
| MM18T | SEMG1     | semenogelin I                                                                            | CCDS13345.1     | chr20_43836290-43836290_A_C  | 118K>Q  | Substitution | Nonsynonymous coding | 11% |
| MM18T | SEMG2     | semenogelin II                                                                           | CCDS13346.1     | chr20_43851577-43851577_C_A  | 435S>Y  | Substitution | Nonsynonymous coding | 13% |
| MM18T | SENP5     | SUMO1/sentrin specific peptidase 5                                                       | CCDS3322.1      | chr3_196612216-196612216_G_T | 55R>I   | Substitution | Nonsynonymous coding | 15% |
| MM18T | SENP5     | SUMO1/sentrin specific peptidase 5                                                       | CCDS3322.1      | chr3_196612414-196612414_C_A | 121S>X  | Substitution | Nonsense             | 13% |
| MM18T | SERF2     | small EDRK-rich factor 2                                                                 | CCDS10104.1     | chr15_44092899-44092899_A_T  | 35K>X   | Substitution | Nonsense             | 16% |
| MM18T | SERPINA11 | serpin peptidase inhibitor, clade A (alpha-1 antiproteinase, antitrypsin), member 11     | CCDS32149.1     | chr14_94909104-94909104_C_T  | 370E>K  | Substitution | Nonsynonymous coding | 13% |
| MM18T | SERPINA11 | serpin peptidase inhibitor, clade A (alpha-1 antiproteinase, antitrypsin), member 11     | CCDS32149.1     | chr14_94909467-94909467_A_G  | 338L>S  | Substitution | Nonsynonymous coding | 19% |
| MM18T | SERPINA3  | serpin peptidase inhibitor, clade A (alpha-1 antiproteinase, antitrypsin), member 3      | CCDS32150.1     | chr14_95080932-95080932_G_A  | 52A>T   | Substitution | Nonsynonymous coding | 14% |
| MM18T | SERPINA6  | serpin peptidase inhibitor, clade A (alpha-1 antiproteinase, antitrypsin), member 6      | CCDS9924.1      | chr14_94770808-94770808_C_T  | 389D>N  | Substitution | Nonsynonymous coding | 11% |
| MM18T | SERPINA7  | serpin peptidase inhibitor, clade A (alpha-1 antiproteinase, antitrypsin), member 7      | CCDS14518.1     | chrX_105277554-105277554_A_C | 395I>M  | Substitution | Nonsynonymous coding | 10% |
| MM18T | SERPINA7  | serpin peptidase inhibitor, clade A (alpha-1 antiproteinase, antitrypsin), member 7      | CCDS14518.1     | chrX_105280746-105280746_C_A | 102D>Y  | Substitution | Nonsynonymous coding | 11% |
| MM18T | SERPINB2  | serpin peptidase inhibitor, clade B (ovalbumin), member 2                                | ENST00000397996 | chr18_61575269-61575269_A_C  | 208K>T  | Substitution | Nonsynonymous coding | 20% |
| MM18T | SERPINB7  | serpin peptidase inhibitor, clade B (ovalbumin), member 7                                | CCDS11988.1     | chr18_61471549-61471549_T    | NA      | Insertion    | Frameshift           | 13% |
| MM18T | SERPINC1  | serpin peptidase inhibitor, clade C (antithrombin), member 1                             | CCDS1313.1      | chr1_173883691-173883691_C_A | 136E>D  | Substitution | Nonsynonymous coding | 10% |
| MM18T | SERPINE3  | serpin peptidase inhibitor, clade E (nexin, plasminogen activator inhibitor type 1),     | NM_001101320    | chr13_51918402-51918402_G_A  | 91D>N   | Substitution | Nonsynonymous coding | 14% |
| MM18T | SERPINE3  | serpin peptidase inhibitor, clade E (nexin, plasminogen activator inhibitor type 1),     | NM_001101320    | chr13_51921355-51921355_A_G  | 229T>A  | Substitution | Nonsynonymous coding | 13% |
| MM18T | SERPINF1  | serpin peptidase inhibitor, clade F (alpha-2 antiplasmin, pigment epithelium derived     | CCDS11012.1     | chr17_1674450-1674450_G_T    | 137K>N  | Substitution | Nonsynonymous coding | 12% |
| MM18T | SERPING1  | serpin peptidase inhibitor, clade G (C1 inhibitor), member 1                             | CCDS7962.1      | chr11_57381814-57381814_T_G  | 421F>L  | Substitution | Nonsynonymous coding | 14% |
| MM18T | SERPINH1  | serpin peptidase inhibitor, clade H (heat shock protein 47), member 1, (collagen binding | CCDS8239.1      | chr11_75277399-75277399_G_A  | 2R>H    | Substitution | Nonsynonymous coding | 13% |
| MM18T | SERPINI2  | serpin peptidase inhibitor, clade I (pancpin), member 2                                  | CCDS3200.1      | chr3_167183336-167183336_T_G | 202N>H  | Substitution | Nonsynonymous coding | 12% |
| MM18T | SERTAD3   | SERTA domain containing 3                                                                | CCDS12558.1     | chr19_40947831-40947831_G_A  | 53R>C   | Substitution | Nonsynonymous coding | 19% |
| MM18T | SETD1A    | SET domain containing 1A                                                                 | CCDS32435.1     | chr16_30990966-30990966_G_A  | 1287E>K | Substitution | Nonsynonymous coding | 11% |
| MM18T | SETD9     | SET domain containing 9                                                                  | CCDS3972.1      | chr5_56207106-56207106_A_C   | 70K>T   | Substitution | Nonsynonymous coding | 18% |
| MM18T | SETD9     | SET domain containing 9                                                                  | CCDS3972.1      | chr5_56212650-56212650_G_A   | 274R>Q  | Substitution | Nonsynonymous coding | 10% |

|       |          |                                                               |             |                               |         |              |                      |     |
|-------|----------|---------------------------------------------------------------|-------------|-------------------------------|---------|--------------|----------------------|-----|
| MM18T | SETDB2   | SET domain, bifurcated 2                                      | CCDS9417.1  | chr13_50035232-50035232_G_T   | ISV-1>  | Substitution | Splice site acceptor | 22% |
| MM18T | SEZ6     | seizure related 6 homolog (mouse)                             | CCDS45639.1 | chr17_27308823-27308823_T_C   | 97D>G   | Substitution | Nonsynonymous coding | 16% |
| MM18T | SEZ6L    | seizure related 6 homolog (mouse)-like                        | CCDS13833.1 | chr22_26688897-26688897_C_T   | 207S>L  | Substitution | Nonsynonymous coding | 13% |
| MM18T | SEZ6L2   | seizure related 6 homolog (mouse)-like 2                      | CCDS10659.1 | chr16_29883730-29883730_T_G   | 869K>T  | Substitution | Nonsynonymous coding | 19% |
| MM18T | SF3B1    | splicing factor 3b, subunit 1, 155kDa                         | CCDS33356.1 | chr2_198267366-198267366_C_T  | 664G>D  | Substitution | Nonsynonymous coding | 13% |
| MM18T | SFMBT2   | Scm-like with four mbt domains 2                              | CCDS31138.1 | chr10_7269879-7269879_C_T     | 381D>N  | Substitution | Nonsynonymous coding | 12% |
| MM18T | SFPQ     | splicing factor proline/glutamine-rich                        | CCDS388.1   | chr1_35656388-35656388_C_A    | 409R>I  | Substitution | Nonsynonymous coding | 12% |
| MM18T | SFTA2    | surfactant associated 2                                       | CCDS4691.1  | chr6_30899321-30899321_T_C    | 61T>A   | Substitution | Nonsynonymous coding | 17% |
| MM18T | SFXN3    | sideroflexin 3                                                | CCDS7508.2  | chr10_102795321-102795321_G_A | 81A>T   | Substitution | Nonsynonymous coding | 19% |
| MM18T | SGCG     | sarcoglycan, gamma (35kDa dystrophin-associated glycoprotein) | CCDS9299.1  | chr13_23777864-23777864_G_T   | 11E>X   | Substitution | Nonsense             | 12% |
| MM18T | SGCZ     | sarcoglycan, zeta                                             | CCDS5992.2  | chr8_13959917-13959917_T_C    | 238K>E  | Substitution | Nonsynonymous coding | 16% |
| MM18T | SGIP1    | SH3-domain GRB2-like (endophilin) interacting protein 1       | CCDS30744.1 | chr1_67147944-67147944_T_G    | 403F>V  | Substitution | Nonsynonymous coding | 15% |
| MM18T | SGK1     | serum/glucocorticoid regulated kinase 1                       | CCDS5170.1  | chr6_134495876-134495876_G_T  | 24L>I   | Substitution | Nonsynonymous coding | 12% |
| MM18T | SH2D7    | SH2 domain containing 7                                       | CCDS45315.1 | chr15_78390741-78390741_C_A   | 150L>M  | Substitution | Nonsynonymous coding | 12% |
| MM18T | SH3BP1   | SH3-domain binding protein 1                                  | CCDS13952.2 | chr22_38040710-38040710_C_T   | 229R>C  | Substitution | Nonsynonymous coding | 17% |
| MM18T | SH3BP5   | SH3-domain binding protein 5 (BTK-associated)                 | CCDS2625.2  | chr3_15297788-15297788_C_A    | 391E>D  | Substitution | Nonsynonymous coding | 12% |
| MM18T | SH3KBP1  | SH3-domain kinase binding protein 1                           | CCDS14193.1 | chrX_19650005-19650005_C_A    | 292D>Y  | Substitution | Nonsynonymous coding | 14% |
| MM18T | SH3PXD2B | SH3 and PX domains 2B                                         | CCDS34291.1 | chr5_171766584-171766584_C_T  | 509E>K  | Substitution | Nonsynonymous coding | 19% |
| MM18T | SH3RF2   | SH3 domain containing ring finger 2                           | CCDS4280.1  | chr5_145379636-145379636_G_A  | 132A>T  | Substitution | Nonsynonymous coding | 14% |
| MM18T | SH3TC1   | SH3 domain and tetratricopeptide repeats 1                    | CCDS3399.1  | chr4_8229327-8229327_G_A      | 636D>N  | Substitution | Nonsynonymous coding | 26% |
| MM18T | SH3TC2   | SH3 domain and tetratricopeptide repeats 2                    | CCDS4293.1  | chr5_148386497-148386497_A_G  | 1208Y>H | Substitution | Nonsynonymous coding | 11% |
| MM18T | SH3TC2   | SH3 domain and tetratricopeptide repeats 2                    | CCDS4293.1  | chr5_148407073-148407073_C_A  | 741R>I  | Substitution | Nonsynonymous coding | 16% |
| MM18T | SHC3     | SHC (Src homology 2 domain containing) transforming protein 3 | CCDS6681.1  | chr9_91653012-91653012_C_A    | 518D>Y  | Substitution | Nonsynonymous coding | 23% |
| MM18T | SHC3     | SHC (Src homology 2 domain containing) transforming protein 3 | CCDS6681.1  | chr9_91793215-91793215_C_T    | 54R>H   | Substitution | Nonsynonymous coding | 14% |
| MM18T | SHCBP1   | SHC SH2-domain binding protein 1                              | CCDS10720.1 | chr16_46637895-46637895_C_T   | 362E>K  | Substitution | Nonsynonymous coding | 33% |
| MM18T | SHISA6   | shisa homolog 6 (Xenopus laevis)                              | CCDS45615.1 | chr17_11461088-11461088_G_A   | 375E>K  | Substitution | Nonsynonymous coding | 12% |
| MM18T | SHKBP1   | SH3KBP1 binding protein 1                                     | CCDS12560.1 | chr19_41086244-41086244_C_T   | 139R>W  | Substitution | Nonsynonymous coding | 18% |
| MM18T | SHROOM1  | shroom family member 1                                        | CCDS4161.1  | chr5_132161019-132161019_C_T  | 272E>K  | Substitution | Nonsynonymous coding | 16% |
| MM18T | SHROOM2  | shroom family member 2                                        | CCDS14135.1 | chrX_9862507-9862507_C_T      | 187R>C  | Substitution | Nonsynonymous coding | 23% |
| MM18T | SHROOM3  | shroom family member 3                                        | CCDS3579.2  | chr4_77670224-77670224_T_G    | 1270L>V | Substitution | Nonsynonymous coding | 17% |
| MM18T | SHROOM3  | shroom family member 3                                        | CCDS3579.2  | chr4_77675759-77675759_C_T    | 1375R>X | Substitution | Nonsense             | 17% |
| MM18T | SHROOM4  | shroom family member 4                                        | CCDS35277.1 | chrX_50350868-50350868_G_T    | 1092L>I | Substitution | Nonsynonymous coding | 17% |

|       |           |                                                                              |                 |                              |         |              |                      |     |
|-------|-----------|------------------------------------------------------------------------------|-----------------|------------------------------|---------|--------------|----------------------|-----|
| MM18T | SHROOM4   | shroom family member 4                                                       | CCDS35277.1     | chrX_50376331-50376331_C_A   | 914K>N  | Substitution | Nonsynonymous coding | 14% |
| MM18T | SHROOM4   | shroom family member 4                                                       | CCDS35277.1     | chrX_50438805-50438805_G_A   | 84L>F   | Substitution | Nonsynonymous coding | 11% |
| MM18T | SI        | sucrase-isomaltase (alpha-glucosidase)                                       | CCDS3196.1      | chr3_164714394-164714394_G_T | 1541L>I | Substitution | Nonsynonymous coding | 10% |
| MM18T | SIDT1     | SID1 transmembrane family, member 1                                          | CCDS2974.1      | chr3_113303574-113303574_C_T | 289R>X  | Substitution | Nonsense             | 13% |
| MM18T | SIGLEC1   | sialic acid binding Ig-like lectin 1, sialoadhesin                           | CCDS13060.1     | chr20_3669811-3669811_C_A    | 1687E>D | Substitution | Nonsynonymous coding | 11% |
| MM18T | SIGLEC1   | sialic acid binding Ig-like lectin 1, sialoadhesin                           | CCDS13060.1     | chr20_3670684-3670684_C_T    | 1607D>N | Substitution | Nonsynonymous coding | 13% |
| MM18T | SIGLEC11  | sialic acid binding Ig-like lectin 11                                        | CCDS12790.2     | chr19_50461597-50461597_A_C  | 532C>G  | Substitution | Nonsynonymous coding | 15% |
| MM18T | SIGLEC11  | sialic acid binding Ig-like lectin 11                                        | CCDS12790.2     | chr19_50461740-50461740_G_A  | 484S>F  | Substitution | Nonsynonymous coding | 12% |
| MM18T | SIGLEC17P | sialic acid binding Ig-like lectin 17, pseudogene                            | ENST00000341811 | chr19_51671041-51671041_G_T  | 83D>Y   | Substitution | Nonsynonymous coding | 12% |
| MM18T | SIGLEC6   | sialic acid binding Ig-like lectin 6                                         | CCDS12834.3     | chr19_52034752-52034752_C_A  | 30R>I   | Substitution | Nonsynonymous coding | 19% |
| MM18T | SIGLEC7   | sialic acid binding Ig-like lectin 7                                         | CCDS12826.1     | chr19_51656482-51656482_G_T  | 462E>X  | Substitution | Nonsense             | 10% |
| MM18T | SIN3A     | SIN3 transcription regulator homolog A (yeast)                               | CCDS10279.1     | chr15_75668126-75668126_C_A  | 1157E>D | Substitution | Nonsynonymous coding | 12% |
| MM18T | SIN3B     | SIN3 transcription regulator homolog B (yeast)                               | CCDS32946.1     | chr19_16940637-16940637_G_T  | 52K>N   | Substitution | Nonsynonymous coding | 15% |
| MM18T | SIPA1     | signal-induced proliferation-associated 1                                    | CCDS8108.1      | chr11_65417073-65417073_C_T  | 856P>L  | Substitution | Nonsynonymous coding | 10% |
| MM18T | SIPA1L2   | signal-induced proliferation-associated 1 like 2                             | CCDS41474.1     | chr1_232574963-232574963_C_T | 1308D>N | Substitution | Nonsynonymous coding | 10% |
| MM18T | SIPA1L2   | signal-induced proliferation-associated 1 like 2                             | CCDS41474.1     | chr1_232649876-232649876_C_T | 404D>N  | Substitution | Nonsynonymous coding | 16% |
| MM18T | SKA3      | spindle and kinetochore associated complex subunit 3                         | CCDS31946.1     | chr13_21729953-21729953_A_   | NA      | Deletion     | Splice site acceptor | 22% |
| MM18T | SKA3      | spindle and kinetochore associated complex subunit 3                         | CCDS31946.1     | chr13_21729953-21729953_A    | NA      | Insertion    | Splice site acceptor | 17% |
| MM18T | SKIL      | SKI-like oncogene                                                            | CCDS33890.1     | chr3_170108833-170108833_A_C | 561M>L  | Substitution | Nonsynonymous coding | 21% |
| MM18T | SKIV2L2   | superkiller virulicidin activity 2-like 2 (S. cerevisiae)                    | CCDS3967.1      | chr5_54710055-54710055_C_T   | 933R>C  | Substitution | Nonsynonymous coding | 12% |
| MM18T | SKP1      | S-phase kinase-associated protein 1                                          | CCDS4171.1      | chr5_133494171-133494171_T_C | 144D>G  | Substitution | Nonsynonymous coding | 12% |
| MM18T | SLAIN2    | SLAIN motif family, member 2                                                 | CCDS47051.1     | chr4_48381781-48381781_G_T   | 260E>X  | Substitution | Nonsense             | 11% |
| MM18T | SLC10A6   | solute carrier family 10 (sodium/bile acid cotransporter family), member 6   | CCDS3614.1      | chr4_87749155-87749155_G_T   | 251S>Y  | Substitution | Nonsynonymous coding | 14% |
| MM18T | SLC12A1   | solute carrier family 12 (sodium/potassium/chloride transporters), member 12 | CCDS10129.2     | chr15_48518762-48518762_C_T  | 240R>C  | Substitution | Nonsynonymous coding | 12% |
| MM18T | SLC12A1   | solute carrier family 12 (sodium/potassium/chloride transporters), member 12 | CCDS10129.2     | chr15_48566838-48566838_C_A  | 825L>I  | Substitution | Nonsynonymous coding | 12% |
| MM18T | SLC12A2   | solute carrier family 12 (sodium/potassium/chloride transporters), member 12 | CCDS4144.1      | chr5_127510255-127510255_G_T | 942E>D  | Substitution | Nonsynonymous coding | 11% |
| MM18T | SLC12A4   | solute carrier family 12 (potassium/chloride transporters), member 4         | CCDS10855.1     | chr16_67985883-67985883_C_A  | 325K>N  | Substitution | Nonsynonymous coding | 18% |
| MM18T | SLC12A8   | solute carrier family 12 (potassium/chloride transporters), member 8         | CCDS43143.1     | chr3_124906179-124906179_G_A | 98R>C   | Substitution | Nonsynonymous coding | 13% |
| MM18T | SLC13A1   | solute carrier family 13 (sodium/sulfate symporters), member 1               | CCDS5786.1      | chr7_122755609-122755609_G_A | 584S>L  | Substitution | Nonsynonymous coding | 13% |
| MM18T | SLC13A4   | solute carrier family 13 (sodium/sulfate symporters), member 4               | CCDS5840.1      | chr7_135390915-135390915_C_T | 167V>M  | Substitution | Nonsynonymous coding | 13% |
| MM18T | SLC13A4   | solute carrier family 13 (sodium/sulfate symporters), member 4               | CCDS5840.1      | chr7_135412184-135412184_G_T | 21L>I   | Substitution | Nonsynonymous coding | 19% |
| MM18T | SLC15A5   | solute carrier family 15, member 5                                           | ENST00000344941 | chr12_16377432-16377432_G_T  | 423L>I  | Substitution | Nonsynonymous coding | 21% |



|       |          |                                                                                             |             |                               |        |              |                      |     |
|-------|----------|---------------------------------------------------------------------------------------------|-------------|-------------------------------|--------|--------------|----------------------|-----|
| MM18T | SLC16A10 | solute carrier family 16, member 10 (aromatic amino acid transporter)                       | CCDS5089.1  | chr6_111543293-111543293_T_G  | 468F>C | Substitution | Nonsynonymous coding | 10% |
| MM18T | SLC17A2  | solute carrier family 17 (sodium phosphate), member 2                                       | CCDS4567.1  | chr6_25916006-25916006_G_T    | 341L>I | Substitution | Nonsynonymous coding | 16% |
| MM18T | SLC17A3  | solute carrier family 17 (sodium phosphate), member 3                                       | CCDS47385.1 | chr6_25862047-25862047_G_A    | 172R>X | Substitution | Nonsense             | 12% |
| MM18T | SLC17A6  | solute carrier family 17 (sodium-dependent inorganic phosphate cotransporter), member 6     | CCDS7856.1  | chr11_22399008-22399008_G_A   | 491V>I | Substitution | Nonsynonymous coding | 11% |
| MM18T | SLC18A2  | solute carrier family 18 (vesicular monoamine), member 2                                    | CCDS7599.1  | chr10_119001310-119001310_C_A | 36L>M  | Substitution | Nonsynonymous coding | 17% |
| MM18T | SLC18A3  | solute carrier family 18 (vesicular acetylcholine), member 3                                | CCDS7231.1  | chr10_50819420-50819420_C_T   | 212R>C | Substitution | Nonsynonymous coding | 11% |
| MM18T | SLC19A3  | solute carrier family 19, member 3                                                          | CCDS2468.1  | chr2_228564119-228564119_C_A  | 104K>N | Substitution | Nonsynonymous coding | 12% |
| MM18T | SLC22A10 | solute carrier family 22, member 10                                                         | CCDS41661.1 | chr11_63064818-63064818_G_A   | 184A>T | Substitution | Nonsynonymous coding | 12% |
| MM18T | SLC22A11 | solute carrier family 22 (organic anion/urate transporter), member 11                       | CCDS8074.1  | chr11_64336141-64336141_G_T   | ISV-1> | Substitution | Splice site acceptor | 10% |
| MM18T | SLC22A14 | solute carrier family 22, member 14                                                         | CCDS2677.1  | chr3_38357992-38357992_C_A    | 570S>R | Substitution | Nonsynonymous coding | 12% |
| MM18T | SLC22A14 | solute carrier family 22, member 14                                                         | CCDS2677.1  | chr3_38359710-38359710_G_T    | 585K>N | Substitution | Nonsynonymous coding | 11% |
| MM18T | SLC22A23 | solute carrier family 22, member 23                                                         | CCDS47363.1 | chr6_3287320-3287320_G_A      | 440T>M | Substitution | Nonsynonymous coding | 16% |
| MM18T | SLC22A25 | solute carrier family 22, member 25                                                         | CCDS31592.1 | chr11_62933694-62933694_C_A   | 369L>F | Substitution | Nonsynonymous coding | 11% |
| MM18T | SLC22A3  | solute carrier family 22 (extraneuronal monoamine transporter), member 3                    | CCDS5277.1  | chr6_160819086-160819086_G_T  | 169A>S | Substitution | Nonsynonymous coding | 12% |
| MM18T | SLC22A3  | solute carrier family 22 (extraneuronal monoamine transporter), member 3                    | CCDS5277.1  | chr6_160857849-160857849_T_G  | 338F>C | Substitution | Nonsynonymous coding | 16% |
| MM18T | SLC22A5  | solute carrier family 22 (organic cation/carnitine transporter), member 5                   | CCDS4154.1  | chr5_131726572-131726572_C_A  | 415L>I | Substitution | Nonsynonymous coding | 18% |
| MM18T | SLC24A5  | solute carrier family 24, member 5                                                          | CCDS10128.1 | chr15_48427105-48427105_C_A   | 172L>I | Substitution | Nonsynonymous coding | 10% |
| MM18T | SLC25A13 | solute carrier family 25 (aspartate/glutamate carrier), member 13                           | CCDS5645.1  | chr7_95751007-95751007_C_T    | 601E>K | Substitution | Nonsynonymous coding | 18% |
| MM18T | SLC25A14 | solute carrier family 25 (mitochondrial carrier, brain), member 14                          | CCDS14623.1 | chrX_129480533-129480533_A_G  | 62D>G  | Substitution | Nonsynonymous coding | 11% |
| MM18T | SLC25A23 | solute carrier family 25 (mitochondrial carrier; phosphate carrier), member 23              | CCDS32882.1 | chr19_6454613-6454613_C_A     | 200R>L | Substitution | Nonsynonymous coding | 18% |
| MM18T | SLC25A29 | solute carrier family 25 (mitochondrial carnitine/acylcarnitine carrier), member 29         | CCDS32156.1 | chr14_100758682-100758682_C_T | 284E>K | Substitution | Nonsynonymous coding | 27% |
| MM18T | SLC25A3  | solute carrier family 25 (mitochondrial carrier; phosphate carrier), member 3               | CCDS9066.1  | chr12_98992304-98992304_A_C   | 156N>T | Substitution | Nonsynonymous coding | 12% |
| MM18T | SLC25A36 | solute carrier family 25 (pyrimidine nucleotide carrier), member 36                         | CCDS46927.1 | chr3_140678385-140678385_A_   | NA     | Deletion     | Splice site donor    | 28% |
| MM18T | SLC25A39 | solute carrier family 25, member 39                                                         | CCDS45700.1 | chr17_42398016-42398016_A_C   | 259F>V | Substitution | Nonsynonymous coding | 11% |
| MM18T | SLC25A4  | solute carrier family 25 (mitochondrial carrier; adenine nucleotide translocator), member 4 | CCDS34114.1 | chr4_186066074-186066074_G_A  | 90A>T  | Substitution | Nonsynonymous coding | 17% |
| MM18T | SLC25A40 | solute carrier family 25, member 40                                                         | CCDS5610.1  | chr7_87479241-87479241_C_T    | 96R>Q  | Substitution | Nonsynonymous coding | 13% |
| MM18T | SLC25A41 | solute carrier family 25, member 41                                                         | CCDS45937.1 | chr19_6427488-6427488_G_A     | 217R>C | Substitution | Nonsynonymous coding | 13% |
| MM18T | SLC25A47 | solute carrier family 25, member 47                                                         | CCDS9959.1  | chr14_100795264-100795264_G_A | 177G>S | Substitution | Nonsynonymous coding | 11% |
| MM18T | SLC25A48 | solute carrier family 25, member 48                                                         | CCDS43366.2 | chr5_135223762-135223762_C_A  | 155L>I | Substitution | Nonsynonymous coding | 11% |
| MM18T | SLC26A10 | solute carrier family 26, member 10                                                         | CCDS8947.1  | chr12_58005682-58005682_G_    | NA     | Deletion     | Frameshift           | 25% |
| MM18T | SLC26A10 | solute carrier family 26, member 10                                                         | CCDS8947.1  | chr12_58005702-58005702_C_T   | 9R>C   | Substitution | Nonsynonymous coding | 13% |
| MM18T | SLC26A4  | solute carrier family 26, member 4                                                          | CCDS5746.1  | chr7_107342373-107342373_G_T  | 635E>D | Substitution | Nonsynonymous coding | 11% |

|       |          |                                                                            |             |                              |        |              |                      |     |
|-------|----------|----------------------------------------------------------------------------|-------------|------------------------------|--------|--------------|----------------------|-----|
| MM18T | SLC26A5  | solute carrier family 26, member 5 (prestin)                               | CCDS5733.1  | chr7_103030920-103030920_G_C | 423L>V | Substitution | Nonsynonymous coding | 11% |
| MM18T | SLC26A8  | solute carrier family 26, member 8                                         | CCDS4813.1  | chr6_35912067-35912067_T_G   | 841K>N | Substitution | Nonsynonymous coding | 12% |
| MM18T | SLC27A1  | solute carrier family 27 (fatty acid transporter), member 1                | CCDS32953.1 | chr19_17615319-17615319_G_T  | 613Q>H | Substitution | Nonsynonymous coding | 13% |
| MM18T | SLC27A4  | solute carrier family 27 (fatty acid transporter), member 4                | CCDS6899.1  | chr9_131122708-131122708_C_T | 624R>C | Substitution | Nonsynonymous coding | 20% |
| MM18T | SLC27A5  | solute carrier family 27 (fatty acid transporter), member 5                | CCDS12983.1 | chr19_59022781-59022781_G_T  | 181A>D | Substitution | Nonsynonymous coding | 14% |
| MM18T | SLC28A1  | solute carrier family 28 (sodium-coupled nucleoside transporter), member 1 | CCDS10334.1 | chr15_85464223-85464223_G_C  | 294A>P | Substitution | Nonsynonymous coding | 11% |
| MM18T | SLC28A1  | solute carrier family 28 (sodium-coupled nucleoside transporter), member 1 | CCDS10334.1 | chr15_85478691-85478691_A_C  | 508K>T | Substitution | Nonsynonymous coding | 13% |
| MM18T | SLC29A3  | solute carrier family 29 (nucleoside transporters), member 3               | CCDS7310.1  | chr10_73111432-73111432_C_T  | 166A>V | Substitution | Nonsynonymous coding | 11% |
| MM18T | SLC2A10  | solute carrier family 2 (facilitated glucose transporter), member 10       | CCDS13402.1 | chr20_45353794-45353794_T_G  | 40F>C  | Substitution | Nonsynonymous coding | 14% |
| MM18T | SLC2A13  | solute carrier family 2 (facilitated glucose transporter), member 13       | CCDS8736.2  | chr12_40265615-40265615_A_C  | 395F>V | Substitution | Nonsynonymous coding | 11% |
| MM18T | SLC2A13  | solute carrier family 2 (facilitated glucose transporter), member 13       | CCDS8736.2  | chr12_40258688-40258688_A_   | NA     | Deletion     | Splice site acceptor | 11% |
| MM18T | SLC2A3   | solute carrier family 2 (facilitated glucose transporter), member 3        | CCDS8586.1  | chr12_8075601-8075601_C_A    | 363S>I | Substitution | Nonsynonymous coding | 12% |
| MM18T | SLC2A4   | solute carrier family 2 (facilitated glucose transporter), member 4        | CCDS11097.1 | chr17_7188495-7188495_C_A    | 370A>D | Substitution | Nonsynonymous coding | 16% |
| MM18T | SLC30A3  | solute carrier family 30 (zinc transporter), member 3                      | CCDS1743.1  | chr2_27480792-27480792_C_T   | 187A>T | Substitution | Nonsynonymous coding | 13% |
| MM18T | SLC30A3  | solute carrier family 30 (zinc transporter), member 3                      | CCDS1743.1  | chr2_27480905-27480905_G_T   | 149S>Y | Substitution | Nonsynonymous coding | 19% |
| MM18T | SLC30A5  | solute carrier family 30 (zinc transporter), member 5                      | CCDS3996.1  | chr5_68414390-68414390_T_G   | 502F>V | Substitution | Nonsynonymous coding | 14% |
| MM18T | SLC30A6  | solute carrier family 30 (zinc transporter), member 6                      | CCDS1780.1  | chr2_32445591-32445591_G_T   | 399V>F | Substitution | Nonsynonymous coding | 13% |
| MM18T | SLC30A8  | solute carrier family 30 (zinc transporter), member 8                      | CCDS6322.1  | chr8_118169947-118169947_C_T | 146L>F | Substitution | Nonsynonymous coding | 12% |
| MM18T | SLC32A1  | solute carrier family 32 (GABA vesicular transporter), member 1            | CCDS13307.1 | chr20_37356196-37356196_G_T  | 164K>N | Substitution | Nonsynonymous coding | 18% |
| MM18T | SLC32A1  | solute carrier family 32 (GABA vesicular transporter), member 1            | CCDS13307.1 | chr20_37356293-37356293_C_T  | 197R>C | Substitution | Nonsynonymous coding | 14% |
| MM18T | SLC32A1  | solute carrier family 32 (GABA vesicular transporter), member 1            | CCDS13307.1 | chr20_37356575-37356575_G_A  | 291D>N | Substitution | Nonsynonymous coding | 14% |
| MM18T | SLC35B2  | solute carrier family 35, member B2                                        | CCDS34462.1 | chr6_44222676-44222676_A_C   | 356F>V | Substitution | Nonsynonymous coding | 16% |
| MM18T | SLC35D2  | solute carrier family 35, member D2                                        | CCDS6717.1  | chr9_99114333-99114333_T_C   | 136T>A | Substitution | Nonsynonymous coding | 22% |
| MM18T | SLC35D3  | solute carrier family 35, member D3                                        | CCDS34544.1 | chr6_137245335-137245335_C_T | 251S>L | Substitution | Nonsynonymous coding | 23% |
| MM18T | SLC35G2  | solute carrier family 35, member G2                                        | CCDS3091.1  | chr3_136574477-136574477_A_C | 392K>T | Substitution | Nonsynonymous coding | 12% |
| MM18T | SLC37A1  | solute carrier family 37 (glycerol-3-phosphate transporter), member 1      | CCDS13689.1 | chr21_43963548-43963548_G_T  | 189R>I | Substitution | Nonsynonymous coding | 17% |
| MM18T | SLC38A11 | solute carrier family 38, member 11                                        | CCDS2224.1  | chr2_165754955-165754955_A_C | 383F>V | Substitution | Nonsynonymous coding | 15% |
| MM18T | SLC38A5  | solute carrier family 38, member 5                                         | CCDS14293.1 | chrX_48317384-48317384_C_T   | 452A>T | Substitution | Nonsynonymous coding | 11% |
| MM18T | SLC38A5  | solute carrier family 38, member 5                                         | CCDS14293.1 | chrX_48319444-48319444_C_T   | 294A>T | Substitution | Nonsynonymous coding | 12% |
| MM18T | SLC38A5  | solute carrier family 38, member 5                                         | CCDS14293.1 | chrX_48321301-48321301_C_T   | 186A>T | Substitution | Nonsynonymous coding | 11% |
| MM18T | SLC38A8  | solute carrier family 38, member 8                                         | CCDS32495.1 | chr16_84067056-84067056_G_T  | 136S>Y | Substitution | Nonsynonymous coding | 23% |
| MM18T | SLC39A14 | solute carrier family 39 (zinc transporter), member 14                     | CCDS47823.1 | chr8_22275335-22275335_C_A   | 440S>Y | Substitution | Nonsynonymous coding | 11% |

|       |         |                                                                                  |                 |                               |         |              |                      |     |
|-------|---------|----------------------------------------------------------------------------------|-----------------|-------------------------------|---------|--------------|----------------------|-----|
| MM18T | SLC39A3 | solute carrier family 39 (zinc transporter), member 3                            | CCDS12093.1     | chr19_2733269-2733269_C_T     | 142R>Q  | Substitution | Nonsynonymous coding | 10% |
| MM18T | SLC39A5 | solute carrier family 39 (metal ion transporter), member 5                       | CCDS8912.2      | chr12_56630789-56630789_G_A   | 428E>K  | Substitution | Nonsynonymous coding | 17% |
| MM18T | SLC39A5 | solute carrier family 39 (metal ion transporter), member 5                       | ENST00000419232 | chr12_56631129-56631129_G_A   | 122E>K  | Substitution | Nonsynonymous coding | 18% |
| MM18T | SLC39A8 | solute carrier family 39 (zinc transporter), member 8                            | CCDS3656.1      | chr4_103184299-103184299_C_T  | 429D>N  | Substitution | Nonsynonymous coding | 18% |
| MM18T | SLC41A3 | solute carrier family 41, member 3                                               | CCDS33843.1     | chr3_125735707-125735707_G_T  | 253L>M  | Substitution | Nonsynonymous coding | 13% |
| MM18T | SLC47A2 | solute carrier family 47, member 2                                               | CCDS11211.1     | chr17_19607446-19607446_C_A   | 355A>S  | Substitution | Nonsynonymous coding | 13% |
| MM18T | SLC4A1  | solute carrier family 4, anion exchanger, member 1 (erythrocyte membrane protein | CCDS11481.1     | chr17_42330585-42330585_G_T   | 738L>I  | Substitution | Nonsynonymous coding | 18% |
| MM18T | SLC4A10 | solute carrier family 4, sodium bicarbonate transporter, member 10               | CCDS46438.1     | chr2_162661016-162661016_G_A  | 63R>Q   | Substitution | Nonsynonymous coding | 16% |
| MM18T | SLC4A10 | solute carrier family 4, sodium bicarbonate transporter, member 10               | CCDS46438.1     | chr2_162815009-162815009_C_T  | 906P>S  | Substitution | Nonsynonymous coding | 12% |
| MM18T | SLC4A4  | solute carrier family 4, sodium bicarbonate cotransporter, member 4              | CCDS47071.1     | chr4_72363248-72363248_T_G    | 669L>V  | Substitution | Nonsynonymous coding | 12% |
| MM18T | SLC4A5  | solute carrier family 4, sodium bicarbonate cotransporter, member 5              | CCDS1936.1      | chr2_74449997-74449997_G_A    | 1126A>V | Substitution | Nonsynonymous coding | 11% |
| MM18T | SLC4A5  | solute carrier family 4, sodium bicarbonate cotransporter, member 5              | CCDS1936.1      | chr2_74454960-74454960_C_T    | 965V>M  | Substitution | Nonsynonymous coding | 11% |
| MM18T | SLC4A7  | solute carrier family 4, sodium bicarbonate cotransporter, member 7              | CCDS33721.1     | chr3_27424720-27424720_C_A    | 1163D>Y | Substitution | Nonsynonymous coding | 15% |
| MM18T | SLC4A7  | solute carrier family 4, sodium bicarbonate cotransporter, member 7              | CCDS33721.1     | chr3_27475463-27475463_C_T    | 232R>Q  | Substitution | Nonsynonymous coding | 13% |
| MM18T | SLC4A7  | solute carrier family 4, sodium bicarbonate cotransporter, member 7              | CCDS33721.1     | chr3_27475557-27475557_C_A    | 201D>Y  | Substitution | Nonsynonymous coding | 17% |
| MM18T | SLC4A7  | solute carrier family 4, sodium bicarbonate cotransporter, member 7              | CCDS33721.1     | chr3_27475530-27475530_C_A    | 210E>X  | Substitution | Nonsense             | 22% |
| MM18T | SLC4A8  | solute carrier family 4, sodium bicarbonate cotransporter, member 8              | CCDS44890.1     | chr12_51856125-51856125_A_C   | 378E>A  | Substitution | Nonsynonymous coding | 12% |
| MM18T | SLC4A9  | solute carrier family 4, sodium bicarbonate cotransporter, member 9              | CCDS47278.1     | chr5_139743368-139743368_G_A  | 379D>N  | Substitution | Nonsynonymous coding | 14% |
| MM18T | SLC4A9  | solute carrier family 4, sodium bicarbonate cotransporter, member 9              | CCDS47278.1     | chr5_139747425-139747425_C_A  | 766L>I  | Substitution | Nonsynonymous coding | 14% |
| MM18T | SLC4A9  | solute carrier family 4, sodium bicarbonate cotransporter, member 9              | CCDS47278.1     | chr5_139745841-139745841_G_T  | 669E>X  | Substitution | Nonsense             | 10% |
| MM18T | SLC50A1 | solute carrier family 50 (sugar transporter), member 1                           | CCDS1093.1      | chr1_155108799-155108799_G_T  | 35M>I   | Substitution | Nonsynonymous coding | 12% |
| MM18T | SLC51A  | solute carrier family 51, alpha subunit                                          | CCDS3314.1      | chr3_195959363-195959363_C_T  | 285S>L  | Substitution | Nonsynonymous coding | 15% |
| MM18T | SLC5A10 | solute carrier family 5 (sodium/glucose cotransporter), member 10                | CCDS11201.2     | chr17_18872679-18872679_C_T   | 195T>M  | Substitution | Nonsynonymous coding | 19% |
| MM18T | SLC5A11 | solute carrier family 5 (sodium/glucose cotransporter), member 11                | CCDS10625.1     | chr16_24881249-24881249_G_A   | 79V>I   | Substitution | Nonsynonymous coding | 15% |
| MM18T | SLC5A3  | solute carrier family 5 (sodium/myo-inositol cotransporter), member 3            | CCDS33549.1     | chr21_35469572-35469572_G_A   | 692R>Q  | Substitution | Nonsynonymous coding | 12% |
| MM18T | SLC5A8  | solute carrier family 5 (iodide transporter), member 8                           | CCDS9080.1      | chr12_101584284-101584284_C_A | 265Q>H  | Substitution | Nonsynonymous coding | 12% |
| MM18T | SLC6A1  | solute carrier family 6 (neurotransmitter transporter, GABA), member 1           | CCDS2603.1      | chr3_11067950-11067950_C_T    | 328S>L  | Substitution | Nonsynonymous coding | 14% |
| MM18T | SLC6A18 | solute carrier family 6, member 18                                               | CCDS3860.1      | chr5_1225749-1225749_G_A      | 53G>R   | Substitution | Nonsynonymous coding | 15% |
| MM18T | SLC6A18 | solute carrier family 6, member 18                                               | CCDS3860.1      | chr5_1240731-1240731_C_A      | 311L>M  | Substitution | Nonsynonymous coding | 16% |
| MM18T | SLC6A18 | solute carrier family 6, member 18                                               | CCDS3860.1      | chr5_1246011-1246011_G_A      | 569A>T  | Substitution | Nonsynonymous coding | 12% |
| MM18T | SLC6A19 | solute carrier family 6 (neutral amino acid transporter), member 19              | CCDS34130.1     | chr5_1214074-1214074_G_T      | 261E>X  | Substitution | Nonsense             | 11% |
| MM18T | SLC6A5  | solute carrier family 6 (neurotransmitter transporter, glycine), member 5        | CCDS7854.1      | chr11_20649562-20649562_T_G   | 478L>V  | Substitution | Nonsynonymous coding | 14% |

|       |          |                                                                                                                                                    |             |                              |         |              |                      |     |
|-------|----------|----------------------------------------------------------------------------------------------------------------------------------------------------|-------------|------------------------------|---------|--------------|----------------------|-----|
| MM18T | SLC6A6   | solute carrier family 6 (neurotransmitter transporter, taurine), member 6                                                                          | CCDS33705.1 | chr3_14485311-14485311_G_A   | 57G>S   | Substitution | Nonsynonymous coding | 15% |
| MM18T | SLC6A7   | solute carrier family 6 (neurotransmitter transporter, L-proline), member 7                                                                        | CCDS4305.1  | chr5_149576745-149576745_G_T | 164E>X  | Substitution | Nonsense             | 12% |
| MM18T | SLC7A1   | solute carrier family 7 (cationic amino acid transporter, y+ system), member 1                                                                     | CCDS9333.1  | chr13_30106988-30106988_C_T  | 168A>T  | Substitution | Nonsynonymous coding | 12% |
| MM18T | SLC7A11  | solute carrier family 7 (anionic amino acid transporter light chain, xc- system), member 1                                                         | CCDS3742.1  | chr4_139104430-139104430_G_T | 315F>L  | Substitution | Nonsynonymous coding | 21% |
| MM18T | SLC7A3   | solute carrier family 7 (cationic amino acid transporter, y+ system), member 3                                                                     | CCDS14404.1 | chrX_70148730-70148730_C_A   | 165D>Y  | Substitution | Nonsynonymous coding | 10% |
| MM18T | SLC7A4   | solute carrier family 7 (orphan transporter), member 4                                                                                             | CCDS33608.1 | chr22_21385669-21385669_A_G  | 145F>L  | Substitution | Nonsynonymous coding | 18% |
| MM18T | SLC7A4   | solute carrier family 7 (orphan transporter), member 4                                                                                             | CCDS33608.1 | chr22_21385819-21385819_G_A  | 95R>C   | Substitution | Nonsynonymous coding | 16% |
| MM18T | SLC7A6OS | solute carrier family 7, member 6 opposite strand                                                                                                  | CCDS10865.1 | chr16_68338136-68338136_C_T  | ISV-1>  | Substitution | Splice site acceptor | 11% |
| MM18T | SLC8A3   | solute carrier family 8 (sodium/calcium exchanger), member 3                                                                                       | CCDS35498.1 | chr14_70633726-70633726_C_T  | 472D>N  | Substitution | Nonsynonymous coding | 12% |
| MM18T | SLC9A4   | solute carrier family 9, subfamily A (NHE4, cation proton antiporter 4), member 4                                                                  | CCDS33264.1 | chr2_103121743-103121743_G_T | 337K>N  | Substitution | Nonsynonymous coding | 14% |
| MM18T | SLC9A5   | solute carrier family 9, subfamily A (NHE5, cation proton antiporter 5), member 5                                                                  | CCDS42178.1 | chr16_67300065-67300065_G_T  | 719D>Y  | Substitution | Nonsynonymous coding | 10% |
| MM18T | SLC9A6   | solute carrier family 9, subfamily A (NHE6, cation proton antiporter 6), member 6                                                                  | CCDS44003.1 | chrX_135095596-135095596_G_T | 412Q>H  | Substitution | Nonsynonymous coding | 14% |
| MM18T | SLC9A7   | solute carrier family 9, subfamily A (NHE7, cation proton antiporter 7), member 7                                                                  | CCDS14269.1 | chrX_46466532-46466532_G_A   | 678S>L  | Substitution | Nonsynonymous coding | 16% |
| MM18T | SLC9B2   | solute carrier family 9, subfamily B (NHA2, cation proton antiporter 2), member 2                                                                  | CCDS3662.1  | chr4_103978963-103978963_A_C | 146L>R  | Substitution | Nonsynonymous coding | 10% |
| MM18T | SLC9C1   | solute carrier family 9, subfamily C (Na+-transporting carboxylic acid decarboxylase), solute carrier organic anion transporter family, member 3A1 | CCDS33817.1 | chr3_111940041-111940041_A_T | 535I>N  | Substitution | Nonsynonymous coding | 13% |
| MM18T | SLCO3A1  | solute carrier organic anion transporter family, member 3A1                                                                                        | CCDS10371.1 | chr15_92669300-92669300_C_T  | 395A>V  | Substitution | Nonsynonymous coding | 14% |
| MM18T | SLCO5A1  | solute carrier organic anion transporter family, member 5A1                                                                                        | CCDS6205.1  | chr8_70744714-70744714_A_C   | 65D>E   | Substitution | Nonsynonymous coding | 17% |
| MM18T | SLCO5A1  | solute carrier organic anion transporter family, member 5A1                                                                                        | CCDS6205.1  | chr8_70585377-70585377_G_T   | 758Y>X  | Substitution | Nonsense             | 16% |
| MM18T | SLCO6A1  | solute carrier organic anion transporter family, member 6A1                                                                                        | CCDS34206.1 | chr5_101813463-101813463_C_T | 240G>E  | Substitution | Nonsynonymous coding | 11% |
| MM18T | SLCO6A1  | solute carrier organic anion transporter family, member 6A1                                                                                        | CCDS34206.1 | chr5_101834349-101834349_C_A | 67R>M   | Substitution | Nonsynonymous coding | 14% |
| MM18T | SLFN11   | schlafen family member 11                                                                                                                          | CCDS11294.1 | chr17_33680112-33680112_C_T  | 657E>K  | Substitution | Nonsynonymous coding | 14% |
| MM18T | SLFN12   | schlafen family member 12                                                                                                                          | CCDS11295.1 | chr17_33738553-33738553_G_A  | 514S>L  | Substitution | Nonsynonymous coding | 14% |
| MM18T | SLFN12   | schlafen family member 12                                                                                                                          | CCDS11295.1 | chr17_33738616-33738616_A_G  | 493V>A  | Substitution | Nonsynonymous coding | 10% |
| MM18T | SLFN5    | schlafen family member 5                                                                                                                           | CCDS32619.1 | chr17_33592230-33592230_T_G  | 667F>V  | Substitution | Nonsynonymous coding | 12% |
| MM18T | SLFN5    | schlafen family member 5                                                                                                                           | CCDS32619.1 | chr17_33592518-33592518_G_T  | 763D>Y  | Substitution | Nonsynonymous coding | 10% |
| MM18T | SLIT1    | slit homolog 1 (Drosophila)                                                                                                                        | CCDS7453.1  | chr10_98762612-98762612_C_T  | 1335V>M | Substitution | Nonsynonymous coding | 17% |
| MM18T | SLIT3    | slit homolog 3 (Drosophila)                                                                                                                        | CCDS4369.1  | chr5_168233532-168233532_G_A | 285T>M  | Substitution | Nonsynonymous coding | 15% |
| MM18T | SLITRK3  | SLIT and NTRK-like family, member 3                                                                                                                | CCDS3197.1  | chr3_164906890-164906890_T_G | 577I>L  | Substitution | Nonsynonymous coding | 12% |
| MM18T | SLITRK3  | SLIT and NTRK-like family, member 3                                                                                                                | CCDS3197.1  | chr3_164907788-164907788_C_A | 277K>N  | Substitution | Nonsynonymous coding | 13% |
| MM18T | SLITRK5  | SLIT and NTRK-like family, member 5                                                                                                                | CCDS9465.1  | chr13_88328077-88328077_G_A  | 145R>Q  | Substitution | Nonsynonymous coding | 16% |
| MM18T | SLITRK5  | SLIT and NTRK-like family, member 5                                                                                                                | CCDS9465.1  | chr13_88328124-88328124_G_A  | 161D>N  | Substitution | Nonsynonymous coding | 17% |
| MM18T | SLTM     | SAFB-like, transcription modulator                                                                                                                 | CCDS10168.2 | chr15_59185145-59185145_C_A  | 617E>X  | Substitution | Nonsense             | 12% |

|       |          |                                                                                          |                 |                               |         |              |                      |     |
|-------|----------|------------------------------------------------------------------------------------------|-----------------|-------------------------------|---------|--------------|----------------------|-----|
| MM18T | SMAD2    | SMAD family member 2                                                                     | CCDS11934.1     | chr18_45422907-45422907_C_G   | 74C>S   | Substitution | Nonsynonymous coding | 19% |
| MM18T | SMAD3    | SMAD family member 3                                                                     | CCDS10222.1     | chr15_67473704-67473704_G_A   | 262D>N  | Substitution | Nonsynonymous coding | 15% |
| MM18T | SMAD3    | SMAD family member 3                                                                     | CCDS10222.1     | chr15_67477076-67477076_C_T   | 295R>W  | Substitution | Nonsynonymous coding | 11% |
| MM18T | SMAD3    | SMAD family member 3                                                                     | CCDS10222.1     | chr15_67482808-67482808_G_C   | 404L>F  | Substitution | Nonsynonymous coding | 12% |
| MM18T | SMARCA2  | SWI/SNF related, matrix associated, actin dependent regulator of chromatin, subfamily    | CCDS34977.1     | chr9_2056786-2056786_G_A      | 430E>K  | Substitution | Nonsynonymous coding | 19% |
| MM18T | SMARCA2  | SWI/SNF related, matrix associated, actin dependent regulator of chromatin, subfamily    | CCDS34977.1     | chr9_2116002-2116002_C_T      | 1213R>W | Substitution | Nonsynonymous coding | 13% |
| MM18T | SMARCAL1 | SWI/SNF related, matrix associated, actin dependent regulator of chromatin, subfamily a- | CCDS2403.1      | chr2_217279649-217279649_G_T  | 74Q>H   | Substitution | Nonsynonymous coding | 16% |
| MM18T | SMC1A    | structural maintenance of chromosomes 1A                                                 | CCDS14352.1     | chrX_53436042-53436042_C_T    | 499R>Q  | Substitution | Nonsynonymous coding | 22% |
| MM18T | SMC1A    | structural maintenance of chromosomes 1A                                                 | CCDS14352.1     | chrX_53441721-53441721_A_T    | 133F>I  | Substitution | Nonsynonymous coding | 13% |
| MM18T | SMC1A    | structural maintenance of chromosomes 1A                                                 | ENST00000375340 | chrX_53448958-53448958_G_C    | 3T>S    | Substitution | Nonsynonymous coding | 10% |
| MM18T | SMC1B    | structural maintenance of chromosomes 1B                                                 | CCDS43027.1     | chr22_45802652-45802652_T_G   | 131Q>H  | Substitution | Nonsynonymous coding | 11% |
| MM18T | SMC1B    | structural maintenance of chromosomes 1B                                                 | CCDS43027.1     | chr22_45792234-45792234_C_A   | 416E>X  | Substitution | Nonsense             | 11% |
| MM18T | SMC2     | structural maintenance of chromosomes 2                                                  | CCDS35086.1     | chr9_106878533-106878533_T_C  | 575I>T  | Substitution | Nonsynonymous coding | 12% |
| MM18T | SMC2     | structural maintenance of chromosomes 2                                                  | CCDS35086.1     | chr9_106891946-106891946_T_G  | 937D>E  | Substitution | Nonsynonymous coding | 13% |
| MM18T | SMC2     | structural maintenance of chromosomes 2                                                  | CCDS35086.1     | chr9_106900349-106900349_C_T  | 1107A>V | Substitution | Nonsynonymous coding | 14% |
| MM18T | SMC3     | structural maintenance of chromosomes 3                                                  | CCDS31285.1     | chr10_112342389-112342389_G_T | 265D>Y  | Substitution | Nonsynonymous coding | 10% |
| MM18T | SMC4     | structural maintenance of chromosomes 4                                                  | CCDS3189.1      | chr3_160141306-160141306_C_T  | 705R>C  | Substitution | Nonsynonymous coding | 12% |
| MM18T | SMCR5    | Smith-Magenis syndrome chromosome region, candidate 5 (non-protein coding)               | ENST00000399333 | chr11_31159300-31159300_T_G   | 37K>T   | Substitution | Nonsynonymous coding | 11% |
| MM18T | SMCR5    | Smith-Magenis syndrome chromosome region, candidate 5 (non-protein coding)               | ENST00000399333 | chr11_31159302-31159302_C_A   | 36E>D   | Substitution | Nonsynonymous coding | 21% |
| MM18T | SMCR8    | Smith-Magenis syndrome chromosome region, candidate 8                                    | CCDS11195.2     | chr17_18219626-18219626_G_A   | 175E>K  | Substitution | Nonsynonymous coding | 12% |
| MM18T | SMG1     | smg-1 homolog, phosphatidylinositol 3-kinase-related kinase (C. elegans)                 | CCDS45430.1     | chr16_18861296-18861296_C_A   | 1812E>D | Substitution | Nonsynonymous coding | 13% |
| MM18T | SMIM10   | small integral membrane protein 10                                                       | ENST00000330288 | chrX_134125033-134125033_G_A  | 48A>T   | Substitution | Nonsynonymous coding | 18% |
| MM18T | SMO      | smoothened, frizzled family receptor                                                     | CCDS5811.1      | chr7_128849185-128849185_C_A  | 471F>L  | Substitution | Nonsynonymous coding | 13% |
| MM18T | SMOX     | spermine oxidase                                                                         | CCDS13075.1     | chr20_4163297-4163297_G_A     | 391E>K  | Substitution | Nonsynonymous coding | 14% |
| MM18T | SMPDL3B  | sphingomyelin phosphodiesterase, acid-like 3B                                            | CCDS30655.1     | chr1_28282355-28282355_G_T    | 284R>L  | Substitution | Nonsynonymous coding | 14% |
| MM18T | SMURF1   | SMAD specific E3 ubiquitin protein ligase 1                                              | CCDS34690.1     | chr7_98636015-98636015_C_T    | 588V>I  | Substitution | Nonsynonymous coding | 11% |
| MM18T | SMYD1    | SET and MYND domain containing 1                                                         | CCDS33240.1     | chr2_88405969-88405969_G_T    | 369E>D  | Substitution | Nonsynonymous coding | 13% |
| MM18T | SMYD1    | SET and MYND domain containing 1                                                         | CCDS33240.1     | chr2_88405974-88405974_C_T    | 371S>L  | Substitution | Nonsynonymous coding | 16% |
| MM18T | SMYD1    | SET and MYND domain containing 1                                                         | CCDS33240.1     | chr2_88410011-88410011_C_A    | 485L>M  | Substitution | Nonsynonymous coding | 12% |
| MM18T | SMYD4    | SET and MYND domain containing 4                                                         | CCDS11013.1     | chr17_1687707-1687707_C_T     | 645V>I  | Substitution | Nonsynonymous coding | 11% |
| MM18T | SNAPC5   | small nuclear RNA activating complex, polypeptide 5, 19kDa                               | CCDS10217.1     | chr15_66786778-66786778_G_A   | 98S>F   | Substitution | Nonsynonymous coding | 13% |
| MM18T | SNCAIP   | synuclein, alpha interacting protein                                                     | ENST00000261367 | chr5_121736744-121736744_G_A  | 41A>T   | Substitution | Nonsynonymous coding | 12% |

|       |         |                                                  |                 |                                |        |              |                      |     |
|-------|---------|--------------------------------------------------|-----------------|--------------------------------|--------|--------------|----------------------|-----|
| MM18T | SNIP1   | Smad nuclear interacting protein 1               | CCDS419.1       | chr1_38019625-38019625_C_A     | 69R>L  | Substitution | Nonsynonymous coding | 27% |
| MM18T | SNRK    | SNF related kinase                               | CCDS43075.1     | chr3_43388902-43388902_A_G     | 384H>R | Substitution | Nonsynonymous coding | 16% |
| MM18T | SNRK    | SNF related kinase                               | CCDS43075.1     | chr3_43389121-43389121_A_C     | 457K>T | Substitution | Nonsynonymous coding | 11% |
| MM18T | SNRK    | SNF related kinase                               | CCDS43075.1     | chr3_43389130-43389130_C_A     | 460S>Y | Substitution | Nonsynonymous coding | 11% |
| MM18T | SNRNP35 | small nuclear ribonucleoprotein 35kDa (U11/U12)  | CCDS45005.1     | chr12_123950689-123950689_G_A  | 206R>Q | Substitution | Nonsynonymous coding | 18% |
| MM18T | SNX19   | sorting nexin 19                                 | CCDS31721.1     | chr11_130780269-130780269_C_   | NA     | Deletion     | Splice site acceptor | 42% |
| MM18T | SNX2    | sorting nexin 2                                  | CCDS34217.1     | chr5_122139174-122139174_T_G   | 170L>R | Substitution | Nonsynonymous coding | 16% |
| MM18T | SNX20   | sorting nexin 20                                 | CCDS10745.1     | chr16_50707630-50707630_G_A    | 213P>L | Substitution | Nonsynonymous coding | 20% |
| MM18T | SNX24   | sorting nexin 24                                 | CCDS4132.1      | chr5_122343380-122343380_T_G   | 149F>C | Substitution | Nonsynonymous coding | 13% |
| MM18T | SOBP    | sine oculis binding protein homolog (Drosophila) | CCDS43488.1     | chr6_107956476-107956476_G_A   | 810A>T | Substitution | Nonsynonymous coding | 17% |
| MM18T | SOD3    | superoxide dismutase 3, extracellular            | CCDS3430.1      | chr4_24801309-24801309_G_A     | 56D>N  | Substitution | Nonsynonymous coding | 12% |
| MM18T | SOGA1   | suppressor of glucose, autophagy associated 1    | CCDS46598.1     | chr20_35425287-35425287_C_A    | 922K>N | Substitution | Nonsynonymous coding | 12% |
| MM18T | SOGA3   | SOGA family member 3                             | CCDS43505.1     | chr6_127797352-127797352_C_T   | 607E>K | Substitution | Nonsynonymous coding | 12% |
| MM18T | SON     | SON DNA binding protein                          | CCDS13629.1     | chr21_34922217-34922217_A_G    | 227E>G | Substitution | Nonsynonymous coding | 11% |
| MM18T | SORBS2  | sorbin and SH3 domain containing 2               | CCDS43289.2     | chr4_186611716-186611716_C_T   | 4G>R   | Substitution | Nonsynonymous coding | 16% |
| MM18T | SOS1    | son of sevenless homolog 1 (Drosophila)          | CCDS1802.1      | chr2_39294881-39294881_A_G     | 34V>A  | Substitution | Nonsynonymous coding | 23% |
| MM18T | SOS2    | son of sevenless homolog 2 (Drosophila)          | CCDS9697.1      | chr14_50612229-50612229_G_A    | 824R>C | Substitution | Nonsynonymous coding | 11% |
| MM18T | SOWAHB  | sosondowah ankyrin repeat domain family member B | CCDS34017.1     | chr4_77817667-77817667_G_A     | 446R>W | Substitution | Nonsynonymous coding | 11% |
| MM18T | SOWAHC  | sosondowah ankyrin repeat domain family member C | CCDS33270.1     | chr2_110373216-110373216_C_T   | 384R>W | Substitution | Nonsynonymous coding | 14% |
| MM18T | SOWAHD  | sosondowah ankyrin repeat domain family member D | CCDS43984.1     | chrX_118892668-118892668_C_T   | 13T>M  | Substitution | Nonsynonymous coding | 19% |
| MM18T | SOWAHD  | sosondowah ankyrin repeat domain family member D | CCDS43984.1     | chrX_118893135-118893135_G_A   | 169D>N | Substitution | Nonsynonymous coding | 13% |
| MM18T | SOX30   | SRY (sex determining region Y)-box 30            | CCDS4339.1      | chr5_157053358-157053358_C_A   | 751R>M | Substitution | Nonsynonymous coding | 18% |
| MM18T | SOX5    | SRY (sex determining region Y)-box 5             | CCDS8699.1      | chr12_23716212-23716212_T_C    | 490N>D | Substitution | Nonsynonymous coding | 12% |
| MM18T | SOX8    | SRY (sex determining region Y)-box 8             | CCDS10428.1     | chr16_1035198-1035198_G_A      | 385D>N | Substitution | Nonsynonymous coding | 12% |
| MM18T | SOX8    | SRY (sex determining region Y)-box 8             | CCDS10428.1     | chr16_1035274-1035274_C_T      | 410S>L | Substitution | Nonsynonymous coding | 20% |
| MM18T | SP100   | SP100 nuclear antigen                            | ENST00000341950 | chr2_231334505-231334508_AAAG_ | NA     | Deletion     | Frameshift           | 27% |
| MM18T | SP100   | SP100 nuclear antigen                            | CCDS42832.1     | chr2_231313857-231313857_C_A   | 193S>Y | Substitution | Nonsynonymous coding | 11% |
| MM18T | SP3     | Sp3 transcription factor                         | CCDS2254.1      | chr2_174819787-174819787_G_T   | 485Q>K | Substitution | Nonsynonymous coding | 10% |
| MM18T | SP7     | Sp7 transcription factor                         | CCDS44897.1     | chr12_53723091-53723091_C_A    | 45K>N  | Substitution | Nonsynonymous coding | 12% |
| MM18T | SP9     | Sp9 transcription factor                         | CCDS46453.1     | chr2_175201480-175201480_G_A   | 223D>N | Substitution | Nonsynonymous coding | 16% |
| MM18T | SPAG16  | sperm associated antigen 16                      | CCDS2396.1      | chr2_215274950-215274950_G_A   | 603E>K | Substitution | Nonsynonymous coding | 10% |
| MM18T | SPAG16  | sperm associated antigen 16                      | CCDS2396.1      | chr2_215274951-215274951_A_C   | 603E>A | Substitution | Nonsynonymous coding | 11% |

|       |           |                                                                          |                 |                              |         |              |                      |     |
|-------|-----------|--------------------------------------------------------------------------|-----------------|------------------------------|---------|--------------|----------------------|-----|
| MM18T | SPAG5     | sperm associated antigen 5                                               | CCDS32594.1     | chr17_26906484-26906484_C_A  | 968E>D  | Substitution | Nonsynonymous coding | 13% |
| MM18T | SPAG7     | sperm associated antigen 7                                               | CCDS42240.1     | chr17_4863328-4863328_G_A    | 136R>W  | Substitution | Nonsynonymous coding | 15% |
| MM18T | SPAG9     | sperm associated antigen 9                                               | CCDS45740.1     | chr17_49077041-49077041_T_   | NA      | Deletion     | Frameshift           | 10% |
| MM18T | SPAG9     | sperm associated antigen 9                                               | CCDS45740.1     | chr17_49097575-49097575_C_T  | 346E>K  | Substitution | Nonsynonymous coding | 13% |
| MM18T | SPAM1     | sperm adhesion molecule 1 (PH-20 hyaluronidase, zona pellucida binding)  | CCDS5790.1      | chr7_123594195-123594195_G_T | 191E>X  | Substitution | Nonsense             | 10% |
| MM18T | SPATA18   | spermatogenesis associated 18                                            | CCDS3489.1      | chr4_52928431-52928431_C_T   | 119R>W  | Substitution | Nonsynonymous coding | 13% |
| MM18T | SPATA3    | spermatogenesis associated 3                                             | NM_139073       | chr2_231867427-231867427_C_T | 168R>C  | Substitution | Nonsynonymous coding | 11% |
| MM18T | SPATA31D1 | SPATA31 subfamily D, member 1                                            | CCDS47986.1     | chr9_84608584-84608584_G_A   | 1067E>K | Substitution | Nonsynonymous coding | 19% |
| MM18T | SPDEF     | SAM pointed domain containing ets transcription factor                   | CCDS4794.1      | chr6_34511949-34511949_A_G   | 95V>A   | Substitution | Nonsynonymous coding | 19% |
| MM18T | SPECC1    | sperm antigen with calponin homology and coiled-coil domains 1           | CCDS32590.1     | chr17_20163513-20163513_G_T  | 949R>I  | Substitution | Nonsynonymous coding | 11% |
| MM18T | SPECC1    | sperm antigen with calponin homology and coiled-coil domains 1           | CCDS32590.1     | chr17_20109061-20109061_G_T  | 567E>X  | Substitution | Nonsense             | 13% |
| MM18T | SPEG      | SPEG complex locus                                                       | CCDS42824.1     | chr2_220309404-220309404_G_A | 140D>N  | Substitution | Nonsynonymous coding | 12% |
| MM18T | SPEG      | SPEG complex locus                                                       | CCDS42824.1     | chr2_220334089-220334089_C_T | 1235R>C | Substitution | Nonsynonymous coding | 16% |
| MM18T | SPEG      | SPEG complex locus                                                       | CCDS42824.1     | chr2_220349158-220349158_G_A | 2325E>K | Substitution | Nonsynonymous coding | 15% |
| MM18T | SPEN      | spen homolog, transcriptional regulator (Drosophila)                     | CCDS164.1       | chr1_16258613-16258613_G_C   | 1960A>P | Substitution | Nonsynonymous coding | 12% |
| MM18T | SPEN      | spen homolog, transcriptional regulator (Drosophila)                     | CCDS164.1       | chr1_16259270-16259270_G_A   | 2179A>T | Substitution | Nonsynonymous coding | 18% |
| MM18T | SPEN      | spen homolog, transcriptional regulator (Drosophila)                     | CCDS164.1       | chr1_16262663-16262663_G_A   | 3310D>N | Substitution | Nonsynonymous coding | 10% |
| MM18T | SPERT     | spermatid associated                                                     | CCDS9399.1      | chr13_46287329-46287329_G_A  | 57E>K   | Substitution | Nonsynonymous coding | 12% |
| MM18T | SPERT     | spermatid associated                                                     | CCDS9399.1      | chr13_46287441-46287441_G_A  | 94R>H   | Substitution | Nonsynonymous coding | 16% |
| MM18T | SPG11     | spastic paraplegia 11 (autosomal recessive)                              | CCDS10112.1     | chr15_44876403-44876403_C_A  | 1825Q>H | Substitution | Nonsynonymous coding | 13% |
| MM18T | SPG7      | spastic paraplegia 7 (pure and complicated autosomal recessive)          | CCDS10977.1     | chr16_89623318-89623318_G_T  | 735K>N  | Substitution | Nonsynonymous coding | 17% |
| MM18T | SPHKAP    | SPHK1 interactor, AKAP domain containing                                 | CCDS46537.1     | chr2_228860235-228860235_G_A | 1542R>X | Substitution | Nonsense             | 14% |
| MM18T | SPIN4     | spindlin family, member 4                                                | CCDS43964.1     | chrX_62570418-62570418_C_A   | 94R>I   | Substitution | Nonsynonymous coding | 15% |
| MM18T | SPINK5    | serine peptidase inhibitor, Kazal type 5                                 | CCDS47300.1     | chr5_147480035-147480035_C_T | 371R>X  | Substitution | Nonsense             | 20% |
| MM18T | SPIRE2    | spire homolog 2 (Drosophila)                                             | CCDS32516.1     | chr16_89922050-89922050_G_A  | 312E>K  | Substitution | Nonsynonymous coding | 12% |
| MM18T | SPIRE2    | spire homolog 2 (Drosophila)                                             | CCDS32516.1     | chr16_89927183-89927183_G_A  | 519D>N  | Substitution | Nonsynonymous coding | 11% |
| MM18T | SPN       | sialophorin                                                              | CCDS10650.1     | chr16_29675597-29675597_C_A  | 183S>Y  | Substitution | Nonsynonymous coding | 12% |
| MM18T | SPNS2     | spinster homolog 2 (Drosophila)                                          | CCDS42237.1     | chr17_4435912-4435912_G_A    | 290D>N  | Substitution | Nonsynonymous coding | 15% |
| MM18T | SPOCK1    | sparc/osteonectin, cwcv and kazal-like domains proteoglycan (testican) 1 | CCDS4191.1      | chr5_136324207-136324207_C_T | 278E>K  | Substitution | Nonsynonymous coding | 14% |
| MM18T | SPOCK1    | sparc/osteonectin, cwcv and kazal-like domains proteoglycan (testican) 1 | CCDS4191.1      | chr5_136834072-136834072_C_T | 59R>H   | Substitution | Nonsynonymous coding | 12% |
| MM18T | SPON1     | spondin 1, extracellular matrix protein                                  | ENST00000310358 | chr11_14284407-14284407_C_T  | 715R>C  | Substitution | Nonsynonymous coding | 16% |
| MM18T | SPPL2C    | signal peptide peptidase like 2C                                         | CCDS32673.1     | chr17_43922330-43922330_G_T  | 20A>S   | Substitution | Nonsynonymous coding | 15% |

|       |        |                                                          |             |                               |         |              |                      |     |
|-------|--------|----------------------------------------------------------|-------------|-------------------------------|---------|--------------|----------------------|-----|
| MM18T | SPSB3  | splA/ryanodine receptor domain and SOCS box containing 3 | CCDS32365.1 | chr16_1827142-1827142_G_A     | 342R>C  | Substitution | Nonsynonymous coding | 18% |
| MM18T | SPTA1  | spectrin, alpha, erythrocytic 1 (elliptocytosis 2)       | CCDS41423.1 | chr1_158619658-158619658_T_C  | 1186E>G | Substitution | Nonsynonymous coding | 12% |
| MM18T | SPTA1  | spectrin, alpha, erythrocytic 1 (elliptocytosis 2)       | CCDS41423.1 | chr1_158581113-158581113_G_A  | 2401R>X | Substitution | Nonsense             | 13% |
| MM18T | SPTB   | spectrin, beta, erythrocytic                             | CCDS32099.1 | chr14_65249067-65249067_G_A   | 1403R>W | Substitution | Nonsynonymous coding | 15% |
| MM18T | SPTB   | spectrin, beta, erythrocytic                             | CCDS32099.1 | chr14_65253247-65253247_G_T   | 1146L>M | Substitution | Nonsynonymous coding | 15% |
| MM18T | SPTB   | spectrin, beta, erythrocytic                             | CCDS32099.1 | chr14_65260150-65260150_T_G   | 744N>T  | Substitution | Nonsynonymous coding | 15% |
| MM18T | SPTB   | spectrin, beta, erythrocytic                             | CCDS32099.1 | chr14_65271728-65271728_C_T   | 77D>N   | Substitution | Nonsynonymous coding | 15% |
| MM18T | SPTBN1 | spectrin, beta, non-erythrocytic 1                       | CCDS33198.1 | chr2_54852095-54852095_C_T    | 446S>F  | Substitution | Nonsynonymous coding | 17% |
| MM18T | SPTBN2 | spectrin, beta, non-erythrocytic 2                       | CCDS8150.1  | chr11_66454930-66454930_C_A   | 2230E>D | Substitution | Nonsynonymous coding | 12% |
| MM18T | SPTBN5 | spectrin, beta, non-erythrocytic 5                       | NM_016642   | chr15_42156166-42156166_C_A   | 2290K>N | Substitution | Nonsynonymous coding | 16% |
| MM18T | SPTBN5 | spectrin, beta, non-erythrocytic 5                       | NM_016642   | chr15_42158419-42158419_C_A   | 2178E>D | Substitution | Nonsynonymous coding | 21% |
| MM18T | SPTBN5 | spectrin, beta, non-erythrocytic 5                       | NM_016642   | chr15_42178263-42178263_G_A   | 362S>F  | Substitution | Nonsynonymous coding | 20% |
| MM18T | SPTBN5 | spectrin, beta, non-erythrocytic 5                       | NM_016642   | chr15_42169104-42169104_C_A   | 1217E>X | Substitution | Nonsense             | 15% |
| MM18T | SPZ1   | spermatogenic leucine zipper 1                           | CCDS43336.1 | chr5_79616582-79616582_A_C    | 183K>T  | Substitution | Nonsynonymous coding | 11% |
| MM18T | SPZ1   | spermatogenic leucine zipper 1                           | CCDS43336.1 | chr5_79617009-79617009_G_T    | 325E>D  | Substitution | Nonsynonymous coding | 12% |
| MM18T | SRBD1  | S1 RNA binding domain 1                                  | CCDS1823.1  | chr2_45645645-45645645_T_G    | 731N>T  | Substitution | Nonsynonymous coding | 21% |
| MM18T | SRBD1  | S1 RNA binding domain 1                                  | CCDS1823.1  | chr2_45807117-45807117_T_G    | 323K>N  | Substitution | Nonsynonymous coding | 11% |
| MM18T | SRBD1  | S1 RNA binding domain 1                                  | CCDS1823.1  | chr2_45826942-45826942_T_G    | 98L>F   | Substitution | Nonsynonymous coding | 13% |
| MM18T | SRCAP  | Snf2-related CREBBP activator protein                    | CCDS10689.2 | chr16_30748528-30748528_G_T   | 2389E>D | Substitution | Nonsynonymous coding | 11% |
| MM18T | SRCIN1 | SRC kinase signaling inhibitor 1                         | CCDS45660.1 | chr17_36718282-36718282_C_T   | 373D>N  | Substitution | Nonsynonymous coding | 11% |
| MM18T | SRCIN1 | SRC kinase signaling inhibitor 1                         | CCDS45660.1 | chr17_36734771-36734771_C_T   | 99R>Q   | Substitution | Nonsynonymous coding | 18% |
| MM18T | SRGAP1 | SLIT-ROBO Rho GTPase activating protein 1                | CCDS8967.1  | chr12_64377821-64377821__A    | NA      | Insertion    | Frameshift           | 14% |
| MM18T | SRGAP3 | SLIT-ROBO Rho GTPase activating protein 3                | CCDS2572.1  | chr3_9051998-9051998_C_T      | 741D>N  | Substitution | Nonsynonymous coding | 12% |
| MM18T | SRPK1  | SRSF protein kinase 1                                    | CCDS47415.1 | chr6_35825081-35825081_G_T    | 526S>Y  | Substitution | Nonsynonymous coding | 11% |
| MM18T | SRPK1  | SRSF protein kinase 1                                    | CCDS47415.1 | chr6_35810384-35810384_A_     | NA      | Deletion     | Splice site acceptor | 11% |
| MM18T | SRPX2  | sushi-repeat containing protein, X-linked 2              | CCDS14471.1 | chrX_99917313-99917313_T_C    | 102S>P  | Substitution | Nonsynonymous coding | 11% |
| MM18T | SRRM2  | serine/arginine repetitive matrix 2                      | CCDS32373.1 | chr16_2815706-2815706_G_T     | 1726R>I | Substitution | Nonsynonymous coding | 17% |
| MM18T | SRRM4  | serine/arginine repetitive matrix 4                      | CCDS44994.1 | chr12_119594398-119594398_C_T | 544S>L  | Substitution | Nonsynonymous coding | 14% |
| MM18T | SRRT   | serrate RNA effector molecule homolog (Arabidopsis)      | CCDS34709.1 | chr7_100478932-100478932_G_A  | 50R>H   | Substitution | Nonsynonymous coding | 18% |
| MM18T | SRRT   | serrate RNA effector molecule homolog (Arabidopsis)      | CCDS34709.1 | chr7_100485396-100485396_G_A  | 748A>T  | Substitution | Nonsynonymous coding | 14% |
| MM18T | SSBP2  | single-stranded DNA binding protein 2                    | CCDS4056.1  | chr5_80724498-80724498_G_T    | 321S>Y  | Substitution | Nonsynonymous coding | 12% |
| MM18T | SSBP2  | single-stranded DNA binding protein 2                    | CCDS4056.1  | chr5_80762842-80762842_T_C    | 197R>G  | Substitution | Nonsynonymous coding | 12% |



|       |            |                                                                                      |                 |                              |         |              |                      |     |
|-------|------------|--------------------------------------------------------------------------------------|-----------------|------------------------------|---------|--------------|----------------------|-----|
| MM18T | SSBP3      | single stranded DNA binding protein 3                                                | CCDS591.1       | chr1_54694030-54694030_C_A   | ISV-1>  | Substitution | Splice site acceptor | 12% |
| MM18T | SSC5D      | scavenger receptor cysteine rich domain containing (5 domains)                       | CCDS46196.1     | chr19_56005081-56005081_G_A  | 339A>T  | Substitution | Nonsynonymous coding | 11% |
| MM18T | SSFA2      | sperm specific antigen 2                                                             | CCDS46467.1     | chr2_182780045-182780045_G_A | 560D>N  | Substitution | Nonsynonymous coding | 17% |
| MM18T | SSFA2      | sperm specific antigen 2                                                             | CCDS46467.1     | chr2_182780133-182780133_G_T | 589R>I  | Substitution | Nonsynonymous coding | 14% |
| MM18T | SSPO       | SCO-spondin homolog (Bos taurus)                                                     | ENST00000378016 | chr7_149476196-149476196_G_T | 358E>D  | Substitution | Nonsynonymous coding | 16% |
| MM18T | SSR4       | signal sequence receptor, delta                                                      | CCDS14731.1     | chrX_153063236-153063236_C_A | 106F>L  | Substitution | Nonsynonymous coding | 21% |
| MM18T | SSTR1      | somatostatin receptor 1                                                              | CCDS9666.1      | chr14_38678685-38678685_G_A  | 31G>R   | Substitution | Nonsynonymous coding | 10% |
| MM18T | SSTR2      | somatostatin receptor 2                                                              | CCDS11691.1     | chr17_71166287-71166287_G_A  | 277V>I  | Substitution | Nonsynonymous coding | 11% |
| MM18T | SSTR4      | somatostatin receptor 4                                                              | CCDS42856.1     | chr20_23017076-23017076_G_A  | 319R>H  | Substitution | Nonsynonymous coding | 14% |
| MM18T | SSU72      | SSU72 RNA polymerase II CTD phosphatase homolog (S. cerevisiae)                      | CCDS32.1        | chr1_1509889-1509889_T_G     | 17N>H   | Substitution | Nonsynonymous coding | 19% |
| MM18T | ST18       | suppression of tumorigenicity 18 (breast carcinoma) (zinc finger protein)            | CCDS6149.1      | chr8_53062482-53062482_T_    | NA      | Deletion     | Frameshift           | 11% |
| MM18T | ST18       | suppression of tumorigenicity 18 (breast carcinoma) (zinc finger protein)            | CCDS6149.1      | chr8_53028906-53028906_G_T   | 978L>M  | Substitution | Nonsynonymous coding | 17% |
| MM18T | ST18       | suppression of tumorigenicity 18 (breast carcinoma) (zinc finger protein)            | CCDS6149.1      | chr8_53073965-53073965_G_T   | 522Q>K  | Substitution | Nonsynonymous coding | 18% |
| MM18T | ST3GAL5    | ST3 beta-galactoside alpha-2,3-sialyltransferase 5                                   | CCDS1986.2      | chr2_86088320-86088320_T_C   | 101D>G  | Substitution | Nonsynonymous coding | 15% |
| MM18T | ST5        | suppression of tumorigenicity 5                                                      | CCDS7791.1      | chr11_8715660-8715660_G_T    | 1133L>I | Substitution | Nonsynonymous coding | 21% |
| MM18T | ST5        | suppression of tumorigenicity 5                                                      | CCDS7791.1      | chr11_8772243-8772243_G_A    | 2T>I    | Substitution | Nonsynonymous coding | 16% |
| MM18T | ST6GAL2    | ST6 beta-galactosamide alpha-2,6-sialyltransferase 2                                 | CCDS2073.1      | chr2_107459524-107459524_C_T | 304A>T  | Substitution | Nonsynonymous coding | 12% |
| MM18T | ST6GAL2    | ST6 beta-galactosamide alpha-2,6-sialyltransferase 2                                 | CCDS2073.1      | chr2_107459950-107459950_C_T | 162A>T  | Substitution | Nonsynonymous coding | 17% |
| MM18T | ST6GALNAC5 | ST6 (alpha-N-acetyl-neuraminyl-2,3-beta-galactosyl-1,3)-N-acetylglucosaminide alpha- | CCDS673.1       | chr1_77528748-77528748_C_T   | 290R>C  | Substitution | Nonsynonymous coding | 15% |
| MM18T | ST8SIA1    | ST8 alpha-N-acetyl-neuraminide alpha-2,8-sialyltransferase 1                         | CCDS8697.1      | chr12_22354879-22354879_C_A  | 226K>N  | Substitution | Nonsynonymous coding | 16% |
| MM18T | ST8SIA5    | ST8 alpha-N-acetyl-neuraminide alpha-2,8-sialyltransferase 5                         | CCDS11930.1     | chr18_44336425-44336425_C_T  | 16R>Q   | Substitution | Nonsynonymous coding | 21% |
| MM18T | STAB1      | stabilin 1                                                                           | CCDS33768.1     | chr3_52553985-52553985_G_A   | 1754R>Q | Substitution | Nonsynonymous coding | 15% |
| MM18T | STAG1      | stromal antigen 1                                                                    | CCDS3090.1      | chr3_136117637-136117637_G_A | 744S>L  | Substitution | Nonsynonymous coding | 11% |
| MM18T | STAG1      | stromal antigen 1                                                                    | CCDS3090.1      | chr3_136076581-136076581_G_A | 1016R>X | Substitution | Nonsense             | 16% |
| MM18T | STAG2      | stromal antigen 2                                                                    | CCDS43990.1     | chrX_123215336-123215336_T_G | 961L>R  | Substitution | Nonsynonymous coding | 12% |
| MM18T | STAG3      | stromal antigen 3                                                                    | CCDS34703.1     | chr7_99783859-99783859_G_T   | 125D>Y  | Substitution | Nonsynonymous coding | 13% |
| MM18T | STAM2      | signal transducing adaptor molecule (SH3 domain and ITAM motif) 2                    | CCDS2196.1      | chr2_153004817-153004817_A_  | NA      | Deletion     | Splice site acceptor | 10% |
| MM18T | STARD3     | StAR-related lipid transfer (START) domain containing 3                              | CCDS11341.1     | chr17_37819126-37819126_C_T  | 435R>X  | Substitution | Nonsense             | 16% |
| MM18T | STARD9     | StAR-related lipid transfer (START) domain containing 9                              | NM_020759       | chr15_42875613-42875613_G_T  | 39K>N   | Substitution | Nonsynonymous coding | 14% |
| MM18T | STAT1      | signal transducer and activator of transcription 1, 91kDa                            | CCDS2309.1      | chr2_191851593-191851593_T_G | 403E>A  | Substitution | Nonsynonymous coding | 14% |
| MM18T | STAT3      | signal transducer and activator of transcription 3 (acute-phase response factor)     | CCDS32656.1     | chr17_40474338-40474338_C_T  | 688R>Q  | Substitution | Nonsynonymous coding | 12% |
| MM18T | STAT3      | signal transducer and activator of transcription 3 (acute-phase response factor)     | CCDS32656.1     | chr17_40491374-40491374_C_A  | 142Q>H  | Substitution | Nonsynonymous coding | 10% |

|       |               |                                                  |              |                              |         |              |                      |     |
|-------|---------------|--------------------------------------------------|--------------|------------------------------|---------|--------------|----------------------|-----|
| MM18T | STEAP3        | STEAP family member 3, metalloredutase           | CCDS42738.1  | chr2_120005298-120005298_C_T | 189S>L  | Substitution | Nonsynonymous coding | 16% |
| MM18T | STEAP3        | STEAP family member 3, metalloredutase           | CCDS42738.1  | chr2_120020901-120020901_C_T | 495T>M  | Substitution | Nonsynonymous coding | 13% |
| MM18T | STH           | saitohin                                         | NM_001007532 | chr17_44076748-44076748_C_A  | 35L>M   | Substitution | Nonsynonymous coding | 13% |
| MM18T | STIL          | SCL/TAL1 interrupting locus                      | CCDS41329.1  | chr1_47746485-47746485_C_T   | 549E>K  | Substitution | Nonsynonymous coding | 13% |
| MM18T | STIL          | SCL/TAL1 interrupting locus                      | CCDS41329.1  | chr1_47767944-47767944_G_A   | 76S>L   | Substitution | Nonsynonymous coding | 13% |
| MM18T | STK10         | serine/threonine kinase 10                       | CCDS34290.1  | chr5_171520689-171520689_C_A | 427E>D  | Substitution | Nonsynonymous coding | 16% |
| MM18T | STK10         | serine/threonine kinase 10                       | CCDS34290.1  | chr5_171614889-171614889_A_G | ISV+2>  | Substitution | Splice site donor    | 15% |
| MM18T | STK11         | serine/threonine kinase 11                       | CCDS45896.1  | chr19_1220500-1220500_C_A    | 198A>D  | Substitution | Nonsynonymous coding | 11% |
| MM18T | STK16         | serine/threonine kinase 16                       | CCDS42822.1  | chr2_220111491-220111491_G_A | 67D>N   | Substitution | Nonsynonymous coding | 13% |
| MM18T | STK17B        | serine/threonine kinase 17b                      | CCDS2315.1   | chr2_197021194-197021194_T_G | 102N>H  | Substitution | Nonsynonymous coding | 10% |
| MM18T | STK24         | serine/threonine kinase 24                       | CCDS9488.1   | chr13_99115944-99115944_C_T  | ISV+1>  | Substitution | Splice site donor    | 13% |
| MM18T | STK38L        | serine/threonine kinase 38 like                  | CCDS31761.1  | chr12_27468237-27468237_A_C  | 264N>T  | Substitution | Nonsynonymous coding | 14% |
| MM18T | STMN1         | stathmin 1                                       | CCDS44090.1  | chr1_26227990-26227990_G_A   | 124R>X  | Substitution | Nonsense             | 17% |
| MM18T | STMN1         | stathmin 1                                       | CCDS44090.1  | chr1_26230230-26230230_C_A   | 30E>X   | Substitution | Nonsense             | 10% |
| MM18T | STON1-GTF2A1L | STON1-GTF2A1L readthrough                        | CCDS1841.1   | chr2_48822381-48822381_G_    | NA      | Deletion     | Frameshift           | 11% |
| MM18T | STON1-GTF2A1L | STON1-GTF2A1L readthrough                        | CCDS1840.1   | chr2_48809024-48809024_G_A   | 418E>K  | Substitution | Nonsynonymous coding | 12% |
| MM18T | STPG2         | sperm-tail PG-rich repeat containing 2           | CCDS3645.1   | chr4_98762049-98762049_T_G   | 360K>T  | Substitution | Nonsynonymous coding | 13% |
| MM18T | STRA8         | stimulated by retinoic acid 8                    | CCDS5839.1   | chr7_134928107-134928107_A_G | 122S>G  | Substitution | Nonsynonymous coding | 11% |
| MM18T | STRA8         | stimulated by retinoic acid 8                    | CCDS5839.1   | chr7_134943201-134943201_T_G | 317I>S  | Substitution | Nonsynonymous coding | 12% |
| MM18T | STRADA        | STE20-related kinase adaptor alpha               | CCDS32703.1  | chr17_61781072-61781072_G_A  | 395R>C  | Substitution | Nonsynonymous coding | 10% |
| MM18T | STRC          | stereocilin                                      | CCDS10098.1  | chr15_43897580-43897580_C_A  | 1271R>I | Substitution | Nonsynonymous coding | 11% |
| MM18T | STRIP1        | striatin interacting protein 1                   | CCDS30798.1  | chr1_110587688-110587688_G_T | 468K>N  | Substitution | Nonsynonymous coding | 17% |
| MM18T | STX16         | syntaxin 16                                      | CCDS13468.1  | chr20_57251345-57251345_T_C  | 326* >Q | Substitution | Nonsynonymous coding | 20% |
| MM18T | STX6          | syntaxin 6                                       | CCDS1341.1   | chr1_180974490-180974490_C_T | 49E>K   | Substitution | Nonsynonymous coding | 10% |
| MM18T | STXBP3        | syntaxin binding protein 3                       | CCDS790.1    | chr1_109339310-109339310_C_T | 440R>C  | Substitution | Nonsynonymous coding | 13% |
| MM18T | STXBP4        | syntaxin binding protein 4                       | CCDS11584.2  | chr17_53237159-53237159_C_T  | 517H>Y  | Substitution | Nonsynonymous coding | 19% |
| MM18T | STXBP5        | syntaxin binding protein 5 (tomosyn)             | CCDS47499.1  | chr6_147703923-147703923_C_T | 1068S>L | Substitution | Nonsynonymous coding | 16% |
| MM18T | STXBP5L       | syntaxin binding protein 5-like                  | CCDS43137.1  | chr3_121097713-121097713_C_A | 800S>Y  | Substitution | Nonsynonymous coding | 24% |
| MM18T | STYK1         | serine/threonine/tyrosine kinase 1               | CCDS8629.1   | chr12_10786604-10786604_G_A  | 58R>C   | Substitution | Nonsynonymous coding | 15% |
| MM18T | SUCLA2        | succinate-CoA ligase, ADP-forming, beta subunit  | CCDS9406.1   | chr13_48523152-48523152_C_T  | 414D>N  | Substitution | Nonsynonymous coding | 12% |
| MM18T | SULF1         | sulfatase 1                                      | CCDS6204.1   | chr8_70498703-70498703_G_A   | 175R>H  | Substitution | Nonsynonymous coding | 15% |
| MM18T | SULT1C2       | sulfotransferase family, cytosolic, 1C, member 2 | CCDS2076.1   | chr2_108921693-108921693_C_A | 201L>I  | Substitution | Nonsynonymous coding | 11% |

|       |           |                                                                            |                 |                              |         |              |                      |     |
|-------|-----------|----------------------------------------------------------------------------|-----------------|------------------------------|---------|--------------|----------------------|-----|
| MM18T | SULT1C3   | sulfotransferase family, cytosolic, 1C, member 3                           | CCDS33267.1     | chr2_108872103-108872103_C_T | 159P>S  | Substitution | Nonsynonymous coding | 10% |
| MM18T | SUN5      | Sad1 and UNC84 domain containing 5                                         | CCDS13209.1     | chr20_31577447-31577447_C_A  | 198D>Y  | Substitution | Nonsynonymous coding | 12% |
| MM18T | SUN5      | Sad1 and UNC84 domain containing 5                                         | CCDS13209.1     | chr20_31592144-31592144_C_A  | 1M>I    | Substitution | Nonsynonymous coding | 13% |
| MM18T | SUPT20HL1 | suppressor of Ty 20 homolog (S. cerevisiae)-like 1                         | NM_001136234    | chrX_24381605-24381605_C_T   | 243S>L  | Substitution | Nonsynonymous coding | 13% |
| MM18T | SUPT20HL2 | suppressor of Ty 20 homolog (S. cerevisiae)-like 2                         | NM_001136233    | chrX_24329473-24329473_G_A   | 654P>S  | Substitution | Nonsynonymous coding | 11% |
| MM18T | SUPT5H    | suppressor of Ty 5 homolog (S. cerevisiae)                                 | CCDS12536.1     | chr19_39966818-39966818_T_C  | ISV+2>  | Substitution | Splice site donor    | 14% |
| MM18T | SUSD5     | sushi domain containing 5                                                  | CCDS46787.1     | chr3_33216432-33216432_A_C   | 182L>V  | Substitution | Nonsynonymous coding | 12% |
| MM18T | SUV39H1   | suppressor of variegation 3-9 homolog 1 (Drosophila)                       | CCDS14304.1     | chrX_48557421-48557421_G_A   | 50D>N   | Substitution | Nonsynonymous coding | 13% |
| MM18T | SUV39H1   | suppressor of variegation 3-9 homolog 1 (Drosophila)                       | CCDS14304.1     | chrX_48559019-48559019_C_T   | 235R>C  | Substitution | Nonsynonymous coding | 15% |
| MM18T | SUV420H2  | suppressor of variegation 4-20 homolog 2 (Drosophila)                      | CCDS12922.1     | chr19_55853630-55853630_A_T  | 53E>V   | Substitution | Nonsynonymous coding | 15% |
| MM18T | SUV420H2  | suppressor of variegation 4-20 homolog 2 (Drosophila)                      | CCDS12922.1     | chr19_55858650-55858650_C_T  | 408R>C  | Substitution | Nonsynonymous coding | 20% |
| MM18T | SUZ12     | suppressor of zeste 12 homolog (Drosophila)                                | CCDS11270.1     | chr17_30321708-30321708_G_T  | 521K>N  | Substitution | Nonsynonymous coding | 14% |
| MM18T | SV2B      | synaptic vesicle glycoprotein 2B                                           | CCDS10370.1     | chr15_91795081-91795081_G_A  | 162A>T  | Substitution | Nonsynonymous coding | 11% |
| MM18T | SV2C      | synaptic vesicle glycoprotein 2C                                           | CCDS43331.1     | chr5_75621215-75621215_C_T   | 676A>V  | Substitution | Nonsynonymous coding | 12% |
| MM18T | SVEP1     | sushi, von Willebrand factor type A, EGF and pentraxin domain containing 1 | CCDS48004.1     | chr9_113168503-113168503_G_A | 3126P>L | Substitution | Nonsynonymous coding | 14% |
| MM18T | SVEP1     | sushi, von Willebrand factor type A, EGF and pentraxin domain containing 1 | CCDS48004.1     | chr9_113245902-113245902_C_T | 668A>T  | Substitution | Nonsynonymous coding | 11% |
| MM18T | SVEP1     | sushi, von Willebrand factor type A, EGF and pentraxin domain containing 1 | CCDS48004.1     | chr9_113275219-113275219_C_A | 430E>D  | Substitution | Nonsynonymous coding | 13% |
| MM18T | SVEP1     | sushi, von Willebrand factor type A, EGF and pentraxin domain containing 1 | CCDS48004.1     | chr9_113308458-113308458_C_A | 301G>C  | Substitution | Nonsynonymous coding | 16% |
| MM18T | SVIL      | supervillin                                                                | CCDS7164.1      | chr10_29821596-29821596_G_T  | 567S>Y  | Substitution | Nonsynonymous coding | 11% |
| MM18T | SVOPL     | SVOP-like                                                                  | CCDS47721.1     | chr7_138341231-138341231_G_A | 166P>S  | Substitution | Nonsynonymous coding | 12% |
| MM18T | SVOPL     | SVOP-like                                                                  | CCDS47721.1     | chr7_138356845-138356845_C_A | 64E>D   | Substitution | Nonsynonymous coding | 11% |
| MM18T | SWAP70    | SWAP switching B-cell complex 70kDa subunit                                | CCDS31426.1     | chr11_9715776-9715776_G_T    | 61E>D   | Substitution | Nonsynonymous coding | 14% |
| MM18T | SYDE2     | synapse defective 1, Rho GTPase, homolog 2 (C. elegans)                    | CCDS44169.1     | chr1_85666216-85666216_C_T   | 155G>E  | Substitution | Nonsynonymous coding | 12% |
| MM18T | SYN1      | synapsin I                                                                 | CCDS14280.1     | chrX_47433929-47433929_G_A   | 485P>L  | Substitution | Nonsynonymous coding | 20% |
| MM18T | SYN3      | synapsin III                                                               | CCDS13908.1     | chr22_32914186-32914186_G_A  | 485P>L  | Substitution | Nonsynonymous coding | 10% |
| MM18T | SYNCRIP   | synaptotagmin binding, cytoplasmic RNA interacting protein                 | CCDS5005.1      | chr6_86324891-86324891_G_T   | 485Y>X  | Substitution | Nonsense             | 15% |
| MM18T | SYNE2     | spectrin repeat containing, nuclear envelope 2                             | CCDS9761.2      | chr14_64457734-64457734_G_T  | 849K>N  | Substitution | Nonsynonymous coding | 12% |
| MM18T | SYNE2     | spectrin repeat containing, nuclear envelope 2                             | CCDS9761.2      | chr14_64473856-64473856_A_C  | 1498K>T | Substitution | Nonsynonymous coding | 11% |
| MM18T | SYNE2     | spectrin repeat containing, nuclear envelope 2                             | CCDS9761.2      | chr14_64520371-64520371_G_A  | 3247R>H | Substitution | Nonsynonymous coding | 15% |
| MM18T | SYNE4     | spectrin repeat containing, nuclear envelope family member 4               | CCDS42553.1     | chr19_36494527-36494527__A   | NA      | Insertion    | Frameshift           | 13% |
| MM18T | SYNM      | synemin, intermediate filament protein                                     | ENST00000336292 | chr15_99671320-99671320_G_A  | 918E>K  | Substitution | Nonsynonymous coding | 12% |
| MM18T | SYNPO     | synaptopodin                                                               | CCDS4308.1      | chr5_150028620-150028620_G_T | 261E>D  | Substitution | Nonsynonymous coding | 15% |

|       |        |                                                                                      |                 |                              |         |              |                      |     |
|-------|--------|--------------------------------------------------------------------------------------|-----------------|------------------------------|---------|--------------|----------------------|-----|
| MM18T | SYNPO2 | synaptopodin 2                                                                       | CCDS34054.1     | chr4_119944589-119944589_G_A | 37R>Q   | Substitution | Nonsynonymous coding | 16% |
| MM18T | SYP    | synaptophysin                                                                        | CCDS14321.1     | chrX_49050733-49050733_C_T   | 105E>K  | Substitution | Nonsynonymous coding | 12% |
| MM18T | SYP    | synaptophysin                                                                        | CCDS14321.1     | chrX_49054283-49054283_C_T   | 40A>T   | Substitution | Nonsynonymous coding | 10% |
| MM18T | SYP    | synaptophysin                                                                        | CCDS14321.1     | chrX_49048221-49048221_C_A   | ISV-1>  | Substitution | Splice site acceptor | 15% |
| MM18T | SYT13  | synaptotagmin XIII                                                                   | CCDS31470.1     | chr11_45265716-45265716_G_T  | 390L>I  | Substitution | Nonsynonymous coding | 18% |
| MM18T | SYT13  | synaptotagmin XIII                                                                   | CCDS31470.1     | chr11_45265831-45265831_C_A  | 351K>N  | Substitution | Nonsynonymous coding | 10% |
| MM18T | SYT13  | synaptotagmin XIII                                                                   | CCDS31470.1     | chr11_45265844-45265844_C_T  | 347R>Q  | Substitution | Nonsynonymous coding | 11% |
| MM18T | SYT13  | synaptotagmin XIII                                                                   | CCDS31470.1     | chr11_45274147-45274147_C_T  | 224G>D  | Substitution | Nonsynonymous coding | 18% |
| MM18T | SYT15  | synaptotagmin XV                                                                     | CCDS44376.1     | chr10_46965795-46965795_G_T  | 248L>I  | Substitution | Nonsynonymous coding | 13% |
| MM18T | SYT17  | synaptotagmin XVII                                                                   | CCDS10575.1     | chr16_19278207-19278207_G_A  | 412G>S  | Substitution | Nonsynonymous coding | 11% |
| MM18T | SYT3   | synaptotagmin III                                                                    | CCDS12798.1     | chr19_51132654-51132654_G_A  | 393S>L  | Substitution | Nonsynonymous coding | 20% |
| MM18T | SYT6   | synaptotagmin VI                                                                     | CCDS871.1       | chr1_114646240-114646240_T_C | 307D>G  | Substitution | Nonsynonymous coding | 16% |
| MM18T | SYT7   | synaptotagmin VII                                                                    | CCDS31577.1     | chr11_61295557-61295557_G_A  | 151T>M  | Substitution | Nonsynonymous coding | 20% |
| MM18T | SYTL2  | synaptotagmin-like 2                                                                 | CCDS31651.1     | chr11_85431917-85431917_A_C  | 837I>M  | Substitution | Nonsynonymous coding | 13% |
| MM18T | SYTL2  | synaptotagmin-like 2                                                                 | ENST00000359152 | chr11_85438890-85438890_G_A  | 61S>F   | Substitution | Nonsynonymous coding | 14% |
| MM18T | SYTL2  | synaptotagmin-like 2                                                                 | ENST00000359152 | chr11_85438270-85438270_C_A  | 268E>X  | Substitution | Nonsense             | 12% |
| MM18T | SYTL4  | synaptotagmin-like 4                                                                 | CCDS14472.1     | chrX_99931106-99931106_C_A   | 645K>N  | Substitution | Nonsynonymous coding | 18% |
| MM18T | SYTL4  | synaptotagmin-like 4                                                                 | CCDS14472.1     | chrX_99936290-99936290_C_T   | 498E>K  | Substitution | Nonsynonymous coding | 12% |
| MM18T | TAB2   | TGF-beta activated kinase 1/MAP3K7 binding protein 2                                 | CCDS5214.1      | chr6_149700304-149700304_C_T | 418A>V  | Substitution | Nonsynonymous coding | 11% |
| MM18T | TAF1   | TAF1 RNA polymerase II, TATA box binding protein (TBP)-associated factor, 250kDa     | CCDS14412.1     | chrX_70602850-70602850_C_A   | 615P>T  | Substitution | Nonsynonymous coding | 13% |
| MM18T | TAF11  | TAF11 RNA polymerase II, TATA box binding protein (TBP)-associated factor, 28kDa     | CCDS4797.1      | chr6_34850854-34850854_C_T   | 59E>K   | Substitution | Nonsynonymous coding | 17% |
| MM18T | TAF1A  | TATA box binding protein (TBP)-associated factor, RNA polymerase I, A, 48kDa         | CCDS1531.1      | chr1_222734775-222734775__T  | NA      | Insertion    | Frameshift           | 11% |
| MM18T | TAF4   | TAF4 RNA polymerase II, TATA box binding protein (TBP)-associated factor, 135kDa     | CCDS33500.1     | chr20_60574158-60574158_C_T  | 932D>N  | Substitution | Nonsynonymous coding | 11% |
| MM18T | TAF6   | TAF6 RNA polymerase II, TATA box binding protein (TBP)-associated factor, 80kDa      | CCDS5686.1      | chr7_99707614-99707614_T_C   | 414N>S  | Substitution | Nonsynonymous coding | 19% |
| MM18T | TAF7   | TAF7 RNA polymerase II, TATA box binding protein (TBP)-associated factor, 55kDa      | CCDS4259.1      | chr5_140699161-140699161_T_G | 151T>P  | Substitution | Nonsynonymous coding | 15% |
| MM18T | TAF7L  | TAF7-like RNA polymerase II, TATA box binding protein (TBP)-associated factor, 50kDa | CCDS35347.1     | chrX_100541576-100541576_T_G | 130K>N  | Substitution | Nonsynonymous coding | 18% |
| MM18T | TAGAP  | T-cell activation RhoGTPase activating protein                                       | CCDS5261.1      | chr6_159460150-159460150_T_C | 260N>S  | Substitution | Nonsynonymous coding | 12% |
| MM18T | TANC1  | tetratricopeptide repeat, ankyrin repeat and coiled-coil containing 1                | CCDS42766.1     | chr2_160031624-160031624_G_A | 555R>Q  | Substitution | Nonsynonymous coding | 14% |
| MM18T | TANC1  | tetratricopeptide repeat, ankyrin repeat and coiled-coil containing 1                | CCDS42766.1     | chr2_160080849-160080849_C_T | 1262A>V | Substitution | Nonsynonymous coding | 12% |
| MM18T | TANC1  | tetratricopeptide repeat, ankyrin repeat and coiled-coil containing 1                | CCDS42766.1     | chr2_160084456-160084456_C_T | 1344R>X | Substitution | Nonsense             | 11% |
| MM18T | TANC2  | tetratricopeptide repeat, ankyrin repeat and coiled-coil containing 2                | CCDS45754.1     | chr17_61493034-61493034_A_G  | 1305N>S | Substitution | Nonsynonymous coding | 17% |
| MM18T | TAOK2  | TAO kinase 2                                                                         | CCDS10663.1     | chr16_29997097-29997097_G_A  | 636R>H  | Substitution | Nonsynonymous coding | 16% |

|       |          |                                                             |                 |                               |         |              |                      |     |
|-------|----------|-------------------------------------------------------------|-----------------|-------------------------------|---------|--------------|----------------------|-----|
| MM18T | TAOK3    | TAO kinase 3                                                | CCDS9188.1      | chr12_118610324-118610324_G_A | 613R>C  | Substitution | Nonsynonymous coding | 11% |
| MM18T | TAOK3    | TAO kinase 3                                                | CCDS9188.1      | chr12_118673396-118673396_G_A | 173S>F  | Substitution | Nonsynonymous coding | 13% |
| MM18T | TAP2     | transporter 2, ATP-binding cassette, sub-family B (MDR/TAP) | CCDS4755.1      | chr6_32803500-32803500_C_T    | 220R>Q  | Substitution | Nonsynonymous coding | 10% |
| MM18T | TAPBP    | TAP binding protein (tapasin)                               | CCDS34426.1     | chr6_33272215-33272215_C_T    | 357D>N  | Substitution | Nonsynonymous coding | 16% |
| MM18T | TARBP1   | TAR (HIV-1) RNA binding protein 1                           | CCDS1601.1      | chr1_234563384-234563384_T_G  | 1063K>N | Substitution | Nonsynonymous coding | 12% |
| MM18T | TARS     | threonyl-tRNA synthetase                                    | CCDS3899.1      | chr5_33461024-33461024_G_T    | 423R>L  | Substitution | Nonsynonymous coding | 16% |
| MM18T | TARS     | threonyl-tRNA synthetase                                    | CCDS3899.1      | chr5_33467784-33467784_C_T    | 715R>C  | Substitution | Nonsynonymous coding | 12% |
| MM18T | TARS2    | threonyl-tRNA synthetase 2, mitochondrial (putative)        | CCDS952.1       | chr1_150470187-150470187_C_T  | 401T>I  | Substitution | Nonsynonymous coding | 10% |
| MM18T | TARSL2   | threonyl-tRNA synthetase-like 2                             | CCDS10394.1     | chr15_102224417-102224417_C_T | 504R>Q  | Substitution | Nonsynonymous coding | 15% |
| MM18T | TAS2R10  | taste receptor, type 2, member 10                           | CCDS8634.1      | chr12_10978243-10978243_G_A   | 209S>L  | Substitution | Nonsynonymous coding | 13% |
| MM18T | TAS2R19  | taste receptor, type 2, member 19                           | CCDS8640.1      | chr12_11174380-11174380_C_T   | 264C>Y  | Substitution | Nonsynonymous coding | 13% |
| MM18T | TAS2R41  | taste receptor, type 2, member 41                           | CCDS43663.1     | chr7_143175836-143175836_C_T  | 291R>X  | Substitution | Nonsense             | 11% |
| MM18T | TAS2R5   | taste receptor, type 2, member 5                            | CCDS5869.1      | chr7_141490829-141490829_C_T  | 223S>F  | Substitution | Nonsynonymous coding | 13% |
| MM18T | TAS2R50  | taste receptor, type 2, member 50                           | CCDS8638.1      | chr12_11138876-11138876_A_C   | 195F>C  | Substitution | Nonsynonymous coding | 12% |
| MM18T | TAS2R7   | taste receptor, type 2, member 7                            | CCDS8631.1      | chr12_10954616-10954616_A_C   | 185F>C  | Substitution | Nonsynonymous coding | 11% |
| MM18T | TBC1D10C | TBC1 domain family, member 10C                              | CCDS8162.1      | chr11_67177101-67177101_G_A   | 406R>Q  | Substitution | Nonsynonymous coding | 23% |
| MM18T | TBC1D12  | TBC1 domain family, member 12                               | CCDS41553.1     | chr10_96234438-96234438_G_A   | 370R>Q  | Substitution | Nonsynonymous coding | 18% |
| MM18T | TBC1D14  | TBC1 domain family, member 14                               | CCDS3394.2      | chr4_7002960-7002960_G_A      | 418E>K  | Substitution | Nonsynonymous coding | 11% |
| MM18T | TBC1D15  | TBC1 domain family, member 15                               | CCDS31858.1     | chr12_72300835-72300835_A_C   | 423K>T  | Substitution | Nonsynonymous coding | 12% |
| MM18T | TBC1D24  | TBC1 domain family, member 24                               | CCDS42107.1     | chr16_2549891-2549891_A_G     | 415K>R  | Substitution | Nonsynonymous coding | 12% |
| MM18T | TBC1D25  | TBC1 domain family, member 25                               | CCDS35242.1     | chrX_48399791-48399791_T_C    | 65V>A   | Substitution | Nonsynonymous coding | 13% |
| MM18T | TBC1D2B  | TBC1 domain family, member 2B                               | CCDS45314.1     | chr15_78294053-78294053__A    | NA      | Insertion    | Frameshift           | 11% |
| MM18T | TBC1D30  | TBC1 domain family, member 30                               | ENST00000229088 | chr12_65230431-65230431_A_C   | 415E>D  | Substitution | Nonsynonymous coding | 18% |
| MM18T | TBC1D30  | TBC1 domain family, member 30                               | ENST00000229088 | chr12_65269179-65269179_A_G   | 796I>V  | Substitution | Nonsynonymous coding | 15% |
| MM18T | TBC1D8   | TBC1 domain family, member 8 (with GRAM domain)             | CCDS46375.1     | chr2_101638926-101638926_C_T  | 845D>N  | Substitution | Nonsynonymous coding | 15% |
| MM18T | TBC1D8   | TBC1 domain family, member 8 (with GRAM domain)             | CCDS46375.1     | chr2_101643856-101643856_C_T  | 822D>N  | Substitution | Nonsynonymous coding | 11% |
| MM18T | TBC1D8   | TBC1 domain family, member 8 (with GRAM domain)             | CCDS46375.1     | chr2_101667072-101667072_C_A  | 206Q>H  | Substitution | Nonsynonymous coding | 15% |
| MM18T | TBC1D8B  | TBC1 domain family, member 8B (with GRAM domain)            | CCDS14522.1     | chrX_106061952-106061952_C_T  | 64R>C   | Substitution | Nonsynonymous coding | 17% |
| MM18T | TBC1D8B  | TBC1 domain family, member 8B (with GRAM domain)            | CCDS14522.1     | chrX_106116961-106116961_C_A  | 1043F>L | Substitution | Nonsynonymous coding | 13% |
| MM18T | TBC1D9   | TBC1 domain family, member 9 (with GRAM domain)             | CCDS47136.1     | chr4_141543675-141543675_C_A  | 1159D>Y | Substitution | Nonsynonymous coding | 12% |
| MM18T | TBCB     | tubulin folding cofactor B                                  | CCDS12488.1     | chr19_36611676-36611676_C_T   | 108T>M  | Substitution | Nonsynonymous coding | 11% |
| MM18T | TBCC     | tubulin folding cofactor C                                  | CCDS4872.1      | chr6_42713474-42713474_C_A    | 113G>V  | Substitution | Nonsynonymous coding | 16% |

|       |         |                                                          |                 |                               |         |              |                      |     |
|-------|---------|----------------------------------------------------------|-----------------|-------------------------------|---------|--------------|----------------------|-----|
| MM18T | TBCD    | tubulin folding cofactor D                               | CCDS45818.1     | chr17_80758763-80758763_G_A   | 281D>N  | Substitution | Nonsynonymous coding | 14% |
| MM18T | TBK1    | TANK-binding kinase 1                                    | CCDS8968.1      | chr12_64878267-64878267_A_G   | 393I>V  | Substitution | Nonsynonymous coding | 17% |
| MM18T | TBL3    | transducin (beta)-like 3                                 | CCDS10453.1     | chr16_2024785-2024785_G_A     | 134R>H  | Substitution | Nonsynonymous coding | 17% |
| MM18T | TBR1    | T-box, brain, 1                                          | CCDS33310.1     | chr2_162280352-162280352_G_A  | 555G>S  | Substitution | Nonsynonymous coding | 13% |
| MM18T | TBX2    | T-box 2                                                  | CCDS11627.2     | chr17_59481816-59481816_C_T   | 282A>V  | Substitution | Nonsynonymous coding | 10% |
| MM18T | TBX21   | T-box 21                                                 | CCDS11514.1     | chr17_45820036-45820036_G_T   | 184R>S  | Substitution | Nonsynonymous coding | 10% |
| MM18T | TBX3    | T-box 3                                                  | CCDS9176.1      | chr12_115109860-115109860_T_G | 673K>T  | Substitution | Nonsynonymous coding | 10% |
| MM18T | TCAIM   | T cell activation inhibitor, mitochondrial               | CCDS2712.1      | chr3_44434423-44434423_C_T    | 217R>C  | Substitution | Nonsynonymous coding | 10% |
| MM18T | TCEAL8  | transcription elongation factor A (SII)-like 8           | CCDS14504.1     | chrX_102508900-102508900_T_G  | 3K>T    | Substitution | Nonsynonymous coding | 20% |
| MM18T | TCERG1  | transcription elongation regulator 1                     | CCDS4282.1      | chr5_145887460-145887460_G_T  | 979E>X  | Substitution | Nonsense             | 12% |
| MM18T | TCERG1L | transcription elongation regulator 1-like                | CCDS7662.2      | chr10_132891531-132891531_C_T | 552R>Q  | Substitution | Nonsynonymous coding | 10% |
| MM18T | TCF7    | transcription factor 7 (T-cell specific, HMG-box)        | CCDS4169.1      | chr5_133451639-133451639_A_G  | 119E>G  | Substitution | Nonsynonymous coding | 14% |
| MM18T | TCF7L1  | transcription factor 7-like 1 (T-cell specific, HMG-box) | CCDS1971.1      | chr2_85361554-85361554_C_A    | 141S>Y  | Substitution | Nonsynonymous coding | 11% |
| MM18T | TCF7L1  | transcription factor 7-like 1 (T-cell specific, HMG-box) | CCDS1971.1      | chr2_85536293-85536293_C_A    | 492P>H  | Substitution | Nonsynonymous coding | 10% |
| MM18T | TCFL5   | transcription factor-like 5 (basic helix-loop-helix)     | ENST00000217162 | chr20_61477457-61477457_T_C   | 417N>D  | Substitution | Nonsynonymous coding | 15% |
| MM18T | TCHH    | trichohyalin                                             | CCDS41396.1     | chr1_152080121-152080121_G_A  | 1858R>C | Substitution | Nonsynonymous coding | 17% |
| MM18T | TCL1B   | T-cell leukemia/lymphoma 1B                              | CCDS32151.1     | chr14_96152880-96152880_G_T   | 26D>Y   | Substitution | Nonsynonymous coding | 14% |
| MM18T | TCOF1   | Treacher Collins-Franceschetti syndrome 1                | CCDS47305.1     | chr5_149755678-149755678_G_A  | 643A>T  | Substitution | Nonsynonymous coding | 14% |
| MM18T | TCP10L  | t-complex 10-like                                        | CCDS13616.1     | chr21_33954601-33954601_C_T   | 90R>Q   | Substitution | Nonsynonymous coding | 14% |
| MM18T | TCP11   | t-complex 11, testis-specific                            | CCDS47413.1     | chr6_35088788-35088788_C_T    | 218D>N  | Substitution | Nonsynonymous coding | 14% |
| MM18T | TCP11L2 | t-complex 11, testis-specific-like 2                     | CCDS9104.1      | chr12_106715333-106715333_G_T | 162D>Y  | Substitution | Nonsynonymous coding | 16% |
| MM18T | TCTE3   | t-complex-associated-testis-expressed 3                  | CCDS5310.1      | chr6_170144330-170144330_T_C  | 54H>R   | Substitution | Nonsynonymous coding | 17% |
| MM18T | TDRD1   | tudor domain containing 1                                | CCDS7588.1      | chr10_115978284-115978284_G_A | 812R>Q  | Substitution | Nonsynonymous coding | 13% |
| MM18T | TDRD12  | tudor domain containing 12                               | ENST00000444215 | chr19_33306420-33306420_T_G   | 1070L>V | Substitution | Nonsynonymous coding | 13% |
| MM18T | TDRD3   | tudor domain containing 3                                | CCDS9441.1      | chr13_61034608-61034608_G_A   | 3R>Q    | Substitution | Nonsynonymous coding | 14% |
| MM18T | TDRD3   | tudor domain containing 3                                | CCDS9441.1      | chr13_61103125-61103125_G_A   | 496G>E  | Substitution | Nonsynonymous coding | 11% |
| MM18T | TDRD6   | tudor domain containing 6                                | CCDS34470.1     | chr6_46656440-46656440_G_A    | 192R>Q  | Substitution | Nonsynonymous coding | 13% |
| MM18T | TDRD6   | tudor domain containing 6                                | CCDS34470.1     | chr6_46661201-46661201_G_T    | 1779G>V | Substitution | Nonsynonymous coding | 11% |
| MM18T | TDRD7   | tudor domain containing 7                                | CCDS6725.1      | chr9_100258092-100258092_C_T  | 1075S>L | Substitution | Nonsynonymous coding | 20% |
| MM18T | TECPR2  | tectonin beta-propeller repeat containing 2              | CCDS32162.1     | chr14_102931586-102931586_T_G | 1250L>R | Substitution | Nonsynonymous coding | 18% |
| MM18T | TECTA   | tectorin alpha                                           | CCDS8434.1      | chr11_120996110-120996110_C_T | 435L>F  | Substitution | Nonsynonymous coding | 12% |
| MM18T | TECTA   | tectorin alpha                                           | CCDS8434.1      | chr11_121028895-121028895_G_A | 1551E>K | Substitution | Nonsynonymous coding | 13% |

|       |        |                                                                               |             |                               |         |              |                      |     |
|-------|--------|-------------------------------------------------------------------------------|-------------|-------------------------------|---------|--------------|----------------------|-----|
| MM18T | TEDDM1 | transmembrane epididymal protein 1                                            | CCDS30953.1 | chr1_182368909-182368909_C_A  | 238E>X  | Substitution | Nonsense             | 14% |
| MM18T | TEKT1  | tektin 1                                                                      | CCDS11083.1 | chr17_6719154-6719154_G_A     | 162R>W  | Substitution | Nonsynonymous coding | 19% |
| MM18T | TEKT3  | tektin 3                                                                      | CCDS11169.1 | chr17_15217480-15217480_C_T   | 268D>N  | Substitution | Nonsynonymous coding | 12% |
| MM18T | TEKT5  | tektin 5                                                                      | CCDS10542.1 | chr16_10775864-10775864_C_A   | 283E>D  | Substitution | Nonsynonymous coding | 12% |
| MM18T | TELO2  | TEL2, telomere maintenance 2, homolog (S. cerevisiae)                         | CCDS32363.1 | chr16_1550627-1550627_G_A     | 403R>Q  | Substitution | Nonsynonymous coding | 15% |
| MM18T | TENM1  | teneurin transmembrane protein 1                                              | CCDS14609.1 | chrX_123518015-123518015_A_G  | 2249Y>H | Substitution | Nonsynonymous coding | 12% |
| MM18T | TENM1  | teneurin transmembrane protein 1                                              | CCDS14609.1 | chrX_123838989-123838989_G_A  | 297R>X  | Substitution | Nonsense             | 14% |
| MM18T | TENM3  | teneurin transmembrane protein 3                                              | CCDS47165.1 | chr4_183609421-183609421_A_G  | 713H>R  | Substitution | Nonsynonymous coding | 17% |
| MM18T | TENM3  | teneurin transmembrane protein 3                                              | CCDS47165.1 | chr4_183676091-183676091_T_C  | 1524F>S | Substitution | Nonsynonymous coding | 10% |
| MM18T | TEP1   | telomerase-associated protein 1                                               | CCDS9548.1  | chr14_20850814-20850814_C_T   | 1370D>N | Substitution | Nonsynonymous coding | 15% |
| MM18T | TERT   | telomerase reverse transcriptase                                              | CCDS3861.2  | chr5_1294198-1294198_C_T      | 268R>H  | Substitution | Nonsynonymous coding | 18% |
| MM18T | TEX10  | testis expressed 10                                                           | CCDS6748.1  | chr9_103091545-103091545_G_T  | 501T>N  | Substitution | Nonsynonymous coding | 15% |
| MM18T | TEX11  | testis expressed 11                                                           | CCDS35323.1 | chrX_69942498-69942498_T_C    | 340N>S  | Substitution | Nonsynonymous coding | 15% |
| MM18T | TEX11  | testis expressed 11                                                           | CCDS35323.1 | chrX_69898743-69898744_AA_    | NA      | Deletion     | Splice site acceptor | 11% |
| MM18T | TEX14  | testis expressed 14                                                           | CCDS32693.1 | chr17_56729341-56729341_G_A   | 8P>S    | Substitution | Nonsynonymous coding | 16% |
| MM18T | TEX15  | testis expressed 15                                                           | CCDS6080.1  | chr8_30702434-30702434_G_A    | 1367A>V | Substitution | Nonsynonymous coding | 13% |
| MM18T | TEX2   | testis expressed 2 [Source:HGNC Symbol;Acc:30884]                             | CCDS11658.1 | chr17_62290299-62290299_C_T   | 427D>N  | Substitution | Nonsynonymous coding | 10% |
| MM18T | TEX264 | testis expressed 264                                                          | CCDS2833.1  | chr3_51733480-51733480_T_G    | 180F>C  | Substitution | Nonsynonymous coding | 12% |
| MM18T | TEX9   | testis expressed 9                                                            | CCDS10157.1 | chr15_56676210-56676210_G_A   | 82E>K   | Substitution | Nonsynonymous coding | 14% |
| MM18T | TF     | transferrin                                                                   | CCDS3080.1  | chr3_133473407-133473407_C_T  | 132R>X  | Substitution | Nonsense             | 16% |
| MM18T | TFAP2A | transcription factor AP-2 alpha (activating enhancer binding protein 2 alpha) | CCDS4510.1  | chr6_10400775-10400775_C_T    | 311E>K  | Substitution | Nonsynonymous coding | 11% |
| MM18T | TFDP1  | transcription factor Dp-1                                                     | CCDS9538.1  | chr13_114290394-114290394_G_A | 264V>I  | Substitution | Nonsynonymous coding | 16% |
| MM18T | TFDP3  | transcription factor Dp family, member 3                                      | CCDS14636.2 | chrX_132351192-132351192_G_C  | 366L>V  | Substitution | Nonsynonymous coding | 13% |
| MM18T | TFDP3  | transcription factor Dp family, member 3                                      | CCDS14636.2 | chrX_132351496-132351496_C_A  | 264K>N  | Substitution | Nonsynonymous coding | 12% |
| MM18T | TFPI2  | tissue factor pathway inhibitor 2                                             | CCDS5632.1  | chr7_93519559-93519559_T_C    | 54Y>C   | Substitution | Nonsynonymous coding | 24% |
| MM18T | TFR2   | transferrin receptor 2                                                        | CCDS34707.1 | chr7_100218568-100218568_C_T  | 773R>Q  | Substitution | Nonsynonymous coding | 17% |
| MM18T | TFRC   | transferrin receptor (p90, CD71)                                              | CCDS3312.1  | chr3_195800874-195800874_G_A  | 121R>C  | Substitution | Nonsynonymous coding | 11% |
| MM18T | TG     | thyroglobulin                                                                 | CCDS34944.1 | chr8_133883794-133883794_G_A  | 159R>Q  | Substitution | Nonsynonymous coding | 24% |
| MM18T | TG     | thyroglobulin                                                                 | CCDS34944.1 | chr8_133899283-133899283_A_T  | 556I>F  | Substitution | Nonsynonymous coding | 16% |
| MM18T | TG     | thyroglobulin                                                                 | CCDS34944.1 | chr8_133925291-133925291_G_T  | ISV-1>  | Substitution | Splice site acceptor | 13% |
| MM18T | TG     | thyroglobulin                                                                 | CCDS34944.1 | chr8_134125681-134125681_C_T  | 2530R>X | Substitution | Nonsense             | 12% |
| MM18T | TGFB11 | transforming growth factor beta 1 induced transcript 1                        | CCDS42156.1 | chr16_31487420-31487420_G_A   | 268E>K  | Substitution | Nonsynonymous coding | 12% |

|       |          |                                                                                 |                 |                              |         |              |                      |     |
|-------|----------|---------------------------------------------------------------------------------|-----------------|------------------------------|---------|--------------|----------------------|-----|
| MM18T | TGFB11   | transforming growth factor beta 1 induced transcript 1                          | CCDS42156.1     | chr16_31487801-31487801_G_A  | ISV-1>  | Substitution | Splice site acceptor | 11% |
| MM18T | TGFB2    | transforming growth factor, beta 2                                              | CCDS44318.1     | chr1_218578608-218578608_G_T | 176E>D  | Substitution | Nonsynonymous coding | 17% |
| MM18T | TGFB2    | transforming growth factor, beta 2                                              | CCDS44318.1     | chr1_218614609-218614609_G_T | 412D>Y  | Substitution | Nonsynonymous coding | 12% |
| MM18T | TGIF2LX  | TGFB-induced factor homeobox 2-like, X-linked                                   | CCDS14459.1     | chrX_89177469-89177469_G_T   | 129D>Y  | Substitution | Nonsynonymous coding | 13% |
| MM18T | TGM2     | transglutaminase 2 (C polypeptide, protein-glutamine-gamma-glutamyltransferase) | CCDS13302.1     | chr20_36768027-36768027_G_A  | 377R>C  | Substitution | Nonsynonymous coding | 13% |
| MM18T | TGM4     | transglutaminase 4 (prostate)                                                   | CCDS2723.1      | chr3_44948614-44948614_A_G   | 417I>V  | Substitution | Nonsynonymous coding | 13% |
| MM18T | TGM7     | transglutaminase 7                                                              | CCDS32213.1     | chr15_43571350-43571350_C_A  | 602D>Y  | Substitution | Nonsynonymous coding | 11% |
| MM18T | THBS2    | thrombospondin 2                                                                | CCDS34574.1     | chr6_169648619-169648619_C_T | 168D>N  | Substitution | Nonsynonymous coding | 15% |
| MM18T | THBS3    | thrombospondin 3                                                                | CCDS1099.1      | chr1_155171230-155171230_C_T | 436R>H  | Substitution | Nonsynonymous coding | 14% |
| MM18T | THEG     | theg spermatid protein                                                          | CCDS12025.1     | chr19_375832-375832_G_A      | 47R>C   | Substitution | Nonsynonymous coding | 18% |
| MM18T | THEM6    | thioesterase superfamily member 6                                               | CCDS6386.1      | chr8_143816795-143816795_G_A | 189E>K  | Substitution | Nonsynonymous coding | 12% |
| MM18T | THNSL2   | threonine synthase-like 2 (S. cerevisiae)                                       | CCDS2002.2      | chr2_88478438-88478438_C_A   | 236F>L  | Substitution | Nonsynonymous coding | 12% |
| MM18T | THOC2    | THO complex 2                                                                   | CCDS43988.1     | chrX_122758479-122758479_T_A | 1033E>D | Substitution | Nonsynonymous coding | 12% |
| MM18T | THRAP3   | thyroid hormone receptor associated protein 3                                   | CCDS405.1       | chr1_36755277-36755277_G_T   | 553D>Y  | Substitution | Nonsynonymous coding | 13% |
| MM18T | THRAP3   | thyroid hormone receptor associated protein 3                                   | CCDS405.1       | chr1_36767202-36767202_A_G   | 851N>D  | Substitution | Nonsynonymous coding | 10% |
| MM18T | THSD7B   | thrombospondin, type I, domain containing 7B                                    | ENST00000272643 | chr2_137814475-137814475_C_T | 209P>S  | Substitution | Nonsynonymous coding | 11% |
| MM18T | THSD7B   | thrombospondin, type I, domain containing 7B                                    | ENST00000272643 | chr2_137988634-137988634_C_A | 582L>I  | Substitution | Nonsynonymous coding | 14% |
| MM18T | THSD7B   | thrombospondin, type I, domain containing 7B                                    | ENST00000272643 | chr2_138208492-138208492_A_C | 1013S>R | Substitution | Nonsynonymous coding | 14% |
| MM18T | THSD7B   | thrombospondin, type I, domain containing 7B                                    | ENST00000272643 | chr2_138376032-138376032_T_G | 1215C>W | Substitution | Nonsynonymous coding | 12% |
| MM18T | THTPA    | thiamine triphosphatase                                                         | CCDS32053.1     | chr14_24027920-24027920_G_T  | 188E>D  | Substitution | Nonsynonymous coding | 12% |
| MM18T | TIAM1    | T-cell lymphoma invasion and metastasis 1                                       | CCDS13609.1     | chr21_32492895-32492895_C_A  | 1523D>Y | Substitution | Nonsynonymous coding | 11% |
| MM18T | TIAM1    | T-cell lymphoma invasion and metastasis 1                                       | CCDS13609.1     | chr21_32496950-32496950_C_A  | 1399R>I | Substitution | Nonsynonymous coding | 17% |
| MM18T | TIAM1    | T-cell lymphoma invasion and metastasis 1                                       | CCDS13609.1     | chr21_32537297-32537297_C_A  | 991E>D  | Substitution | Nonsynonymous coding | 11% |
| MM18T | TIAM1    | T-cell lymphoma invasion and metastasis 1                                       | CCDS13609.1     | chr21_32554840-32554840_C_T  | 929E>K  | Substitution | Nonsynonymous coding | 17% |
| MM18T | TIAM1    | T-cell lymphoma invasion and metastasis 1                                       | CCDS13609.1     | chr21_32567591-32567591_C_T  | 842V>I  | Substitution | Nonsynonymous coding | 14% |
| MM18T | TIAM1    | T-cell lymphoma invasion and metastasis 1                                       | CCDS13609.1     | chr21_32638883-32638883_C_T  | 136G>R  | Substitution | Nonsynonymous coding | 12% |
| MM18T | TIAM2    | T-cell lymphoma invasion and metastasis 2                                       | CCDS34558.1     | chr6_155578154-155578154_G_A | 1669D>N | Substitution | Nonsynonymous coding | 11% |
| MM18T | TIE1     | tyrosine kinase with immunoglobulin-like and EGF-like domains 1                 | CCDS482.1       | chr1_43772827-43772827_C_T   | 219R>C  | Substitution | Nonsynonymous coding | 11% |
| MM18T | TIMD4    | T-cell immunoglobulin and mucin domain containing 4                             | CCDS4332.1      | chr5_156349151-156349151_C_T | 324G>E  | Substitution | Nonsynonymous coding | 13% |
| MM18T | TIMELESS | timeless circadian clock                                                        | CCDS8918.1      | chr12_56822162-56822162_C_T  | 479R>Q  | Substitution | Nonsynonymous coding | 12% |
| MM18T | TIMM17A  | translocase of inner mitochondrial membrane 17 homolog A (yeast)                | CCDS1417.1      | chr1_201938668-201938668_C_T | 168R>X  | Substitution | Nonsense             | 12% |
| MM18T | TIPARP   | TCDD-inducible poly(ADP-ribose) polymerase                                      | CCDS3177.1      | chr3_156396212-156396212_T_G | 242I>M  | Substitution | Nonsynonymous coding | 13% |



|       |          |                                                                        |              |                               |         |              |                      |     |
|-------|----------|------------------------------------------------------------------------|--------------|-------------------------------|---------|--------------|----------------------|-----|
| MM18T | TJP1     | tight junction protein 1                                               | CCDS42007.1  | chr15_30008950-30008950_C_T   | 1356R>Q | Substitution | Nonsynonymous coding | 12% |
| MM18T | TJP1     | tight junction protein 1                                               | CCDS42007.1  | chr15_30020172-30020172_C_T   | 690R>H  | Substitution | Nonsynonymous coding | 11% |
| MM18T | TJP2     | tight junction protein 2                                               | CCDS6627.1   | chr9_71852851-71852851_A_C    | 746K>T  | Substitution | Nonsynonymous coding | 15% |
| MM18T | TLE3     | transducin-like enhancer of split 3 (E(sp1) homolog, Drosophila)       | CCDS45293.1  | chr15_70388541-70388541_C_A   | 28R>S   | Substitution | Nonsynonymous coding | 11% |
| MM18T | TLK1     | tousled-like kinase 1                                                  | CCDS2241.1   | chr2_171906415-171906415_G_A  | 297R>X  | Substitution | Nonsense             | 15% |
| MM18T | TLL2     | tolloid-like 2                                                         | CCDS7449.1   | chr10_98133439-98133439_G_A   | 859T>M  | Substitution | Nonsynonymous coding | 16% |
| MM18T | TLL2     | tolloid-like 2                                                         | CCDS7449.1   | chr10_98192638-98192638_C_A   | 149R>I  | Substitution | Nonsynonymous coding | 15% |
| MM18T | TLN1     | talin 1                                                                | CCDS35009.1  | chr9_35710800-35710800_G_T    | 1399N>K | Substitution | Nonsynonymous coding | 18% |
| MM18T | TLN2     | talin 2                                                                | CCDS32261.1  | chr15_63017201-63017201_A_C   | 1051E>D | Substitution | Nonsynonymous coding | 13% |
| MM18T | TLN2     | talin 2                                                                | CCDS32261.1  | chr15_63029196-63029196_G_A   | 1160V>M | Substitution | Nonsynonymous coding | 16% |
| MM18T | TLR7     | toll-like receptor 7                                                   | CCDS14151.1  | chrX_12905320-12905320_C_A    | 565L>I  | Substitution | Nonsynonymous coding | 16% |
| MM18T | TLR7     | toll-like receptor 7                                                   | CCDS14151.1  | chrX_12905977-12905977_C_T    | 784R>W  | Substitution | Nonsynonymous coding | 14% |
| MM18T | TLR8     | toll-like receptor 8                                                   | CCDS14152.1  | chrX_12940136-12940136_C_T    | 993R>W  | Substitution | Nonsynonymous coding | 15% |
| MM18T | TM2D1    | TM2 domain containing 1                                                | NM_032027    | chr1_62149166-62149166_C_A    | 189R>I  | Substitution | Nonsynonymous coding | 15% |
| MM18T | TM4SF20  | transmembrane 4 L six family member 20                                 | CCDS2466.1   | chr2_228230964-228230964_A_G  | ISV-4>  | Substitution | Splice site acceptor | 12% |
| MM18T | TM6SF1   | transmembrane 6 superfamily member 1                                   | CCDS10323.1  | chr15_83788351-83788351_G_A   | 106A>T  | Substitution | Nonsynonymous coding | 15% |
| MM18T | TM7SF3   | transmembrane 7 superfamily member 3                                   | CCDS8710.1   | chr12_27127085-27127085_C_T   | 509R>Q  | Substitution | Nonsynonymous coding | 14% |
| MM18T | TM9SF1   | transmembrane 9 superfamily member 1                                   | CCDS9617.1   | chr14_24662235-24662235_C_T   | 196E>K  | Substitution | Nonsynonymous coding | 14% |
| MM18T | TM9SF2   | transmembrane 9 superfamily member 2                                   | CCDS9493.1   | chr13_100211635-100211635_C_T | 591R>C  | Substitution | Nonsynonymous coding | 18% |
| MM18T | TMC4     | transmembrane channel-like 4                                           | CCDS46174.1  | chr19_54664211-54664211_C_A   | 688R>I  | Substitution | Nonsynonymous coding | 13% |
| MM18T | TMCC2    | transmembrane and coiled-coil domain family 2                          | CCDS30984.1  | chr1_205210817-205210817_G_A  | 131R>H  | Substitution | Nonsynonymous coding | 18% |
| MM18T | TMCC2    | transmembrane and coiled-coil domain family 2                          | CCDS30984.1  | chr1_205238408-205238408_C_T  | 360R>C  | Substitution | Nonsynonymous coding | 20% |
| MM18T | TMEFF2   | transmembrane protein with EGF-like and two follistatin-like domains 2 | CCDS2314.1   | chr2_193049143-193049143_G_A  | 117R>X  | Substitution | Nonsense             | 13% |
| MM18T | TMEM100  | transmembrane protein 100                                              | CCDS11587.1  | chr17_53798376-53798376_G_A   | 19A>V   | Substitution | Nonsynonymous coding | 12% |
| MM18T | TMEM131  | transmembrane protein 131                                              | CCDS46368.1  | chr2_98373663-98373663_C_T    | 1851D>N | Substitution | Nonsynonymous coding | 14% |
| MM18T | TMEM131  | transmembrane protein 131                                              | CCDS46368.1  | chr2_98504550-98504550_T_C    | 108I>M  | Substitution | Nonsynonymous coding | 12% |
| MM18T | TMEM132B | transmembrane protein 132B                                             | CCDS41859.1  | chr12_125834593-125834593_G_T | 216E>D  | Substitution | Nonsynonymous coding | 11% |
| MM18T | TMEM132D | transmembrane protein 132D                                             | CCDS9266.1   | chr12_130184413-130184413_C_T | 304V>M  | Substitution | Nonsynonymous coding | 11% |
| MM18T | TMEM132E | transmembrane protein 132E                                             | CCDS11283.1  | chr17_32964443-32964443_C_A   | 716P>H  | Substitution | Nonsynonymous coding | 11% |
| MM18T | TMEM161A | transmembrane protein 161A                                             | CCDS12393.1  | chr19_19231956-19231956_C_T   | 312D>N  | Substitution | Nonsynonymous coding | 11% |
| MM18T | TMEM2    | transmembrane protein 2                                                | CCDS6638.1   | chr9_74315635-74315635_T_G    | 1100E>D | Substitution | Nonsynonymous coding | 11% |
| MM18T | TMEM200B | transmembrane protein 200B                                             | NM_001003682 | chr1_29447621-29447621_C_A    | 240Q>H  | Substitution | Nonsynonymous coding | 10% |

|       |           |                                                                        |                 |                               |        |              |                      |     |
|-------|-----------|------------------------------------------------------------------------|-----------------|-------------------------------|--------|--------------|----------------------|-----|
| MM18T | TMEM203   | transmembrane protein 203                                              | CCDS35185.1     | chr9_140099659-140099659_G_A  | 70R>C  | Substitution | Nonsynonymous coding | 22% |
| MM18T | TMEM229A  | transmembrane protein 229A                                             | CCDS47694.1     | chr7_123672151-123672151_C_T  | 303G>S | Substitution | Nonsynonymous coding | 21% |
| MM18T | TMEM258   | transmembrane protein 258                                              | CCDS8009.1      | chr11_61557272-61557272_C_T   | 79V>M  | Substitution | Nonsynonymous coding | 12% |
| MM18T | TMEM39B   | transmembrane protein 39B                                              | ENST00000427288 | chr1_32566182-32566182_G_A    | 304E>K | Substitution | Nonsynonymous coding | 18% |
| MM18T | TMEM48    | transmembrane protein 48                                               | CCDS583.1       | chr1_54238032-54238032_C_T    | 644R>Q | Substitution | Nonsynonymous coding | 14% |
| MM18T | TMEM50B   | transmembrane protein 50B                                              | CCDS13625.1     | chr21_34837679-34837679_T_G   | 84S>R  | Substitution | Nonsynonymous coding | 11% |
| MM18T | TMEM74    | transmembrane protein 74                                               | CCDS6310.1      | chr8_109797168-109797168_C_T  | 54E>K  | Substitution | Nonsynonymous coding | 14% |
| MM18T | TMEM8A    | transmembrane protein 8A                                               | CCDS10407.1     | chr16_422195-422195_G_T       | 703S>Y | Substitution | Nonsynonymous coding | 17% |
| MM18T | TMEM8C    | transmembrane protein 8C                                               | NM_001080483    | chr9_136389833-136389833_G_A  | 45A>V  | Substitution | Nonsynonymous coding | 15% |
| MM18T | TMEM97    | transmembrane protein 97                                               | CCDS11226.2     | chr17_26653807-26653807__A    | NA     | Insertion    | Frameshift           | 13% |
| MM18T | TMIE      | transmembrane inner ear                                                | CCDS43081.1     | chr3_46750645-46750645_C_T    | 81R>C  | Substitution | Nonsynonymous coding | 18% |
| MM18T | TMOD1     | tropomodulin 1                                                         | CCDS6726.1      | chr9_100331288-100331288_C_A  | 280T>N | Substitution | Nonsynonymous coding | 17% |
| MM18T | TMPO      | thymopoietin                                                           | CCDS31879.1     | chr12_98941597-98941597_C_A   | 442F>L | Substitution | Nonsynonymous coding | 11% |
| MM18T | TMPPE     | transmembrane protein with metallophosphoesterase domain               | CCDS33732.1     | chr3_33134421-33134421_C_T    | 423V>M | Substitution | Nonsynonymous coding | 14% |
| MM18T | TMPRSS2   | transmembrane protease, serine 2                                       | CCDS33564.1     | chr21_42852452-42852452_C_T   | 175D>N | Substitution | Nonsynonymous coding | 14% |
| MM18T | TMPRSS3   | transmembrane protease, serine 3                                       | CCDS13686.1     | chr21_43808587-43808587_G_A   | 124S>L | Substitution | Nonsynonymous coding | 10% |
| MM18T | TMPRSS3   | transmembrane protease, serine 3                                       | ENST00000380399 | chr21_43815536-43815536_T_G   | 81E>D  | Substitution | Nonsynonymous coding | 14% |
| MM18T | TMPRSS4   | transmembrane protease, serine 4                                       | CCDS31684.1     | chr11_117978571-117978571_C_T | 175R>C | Substitution | Nonsynonymous coding | 11% |
| MM18T | TMPRSS6   | transmembrane protease, serine 6                                       | CCDS13941.1     | chr22_37480844-37480844_C_T   | 346D>N | Substitution | Nonsynonymous coding | 11% |
| MM18T | TMPRSS6   | transmembrane protease, serine 6                                       | CCDS13941.1     | chr22_37499285-37499285_G_A   | 67S>L  | Substitution | Nonsynonymous coding | 20% |
| MM18T | TMPRSS7   | transmembrane protease, serine 7                                       | CCDS43129.2     | chr3_111766666-111766666_C_A  | 145L>M | Substitution | Nonsynonymous coding | 10% |
| MM18T | TMPRSS9   | transmembrane protease, serine 9                                       | CCDS12088.1     | chr19_2399177-2399177_C_T     | 133S>L | Substitution | Nonsynonymous coding | 12% |
| MM18T | TMTC1     | transmembrane and tetratricopeptide repeat containing 1                | CCDS8718.1      | chr12_29659826-29659826_G_A   | 760R>C | Substitution | Nonsynonymous coding | 11% |
| MM18T | TMX2      | thioredoxin-related transmembrane protein 2                            | CCDS7967.1      | chr11_57506447-57506447_T_C   | 184Y>H | Substitution | Nonsynonymous coding | 10% |
| MM18T | TNFAIP2   | tumor necrosis factor, alpha-induced protein 2                         | CCDS9979.1      | chr14_103592981-103592981_G_A | 63E>K  | Substitution | Nonsynonymous coding | 19% |
| MM18T | TNFRSF11A | tumor necrosis factor receptor superfamily, member 11a, NFkB activator | CCDS11980.1     | chr18_60021755-60021755_G_A   | 139A>T | Substitution | Nonsynonymous coding | 16% |
| MM18T | TNFRSF11B | tumor necrosis factor receptor superfamily, member 11b                 | CCDS6326.1      | chr8_119936767-119936767_T_C  | 351H>R | Substitution | Nonsynonymous coding | 13% |
| MM18T | TNFRSF13B | tumor necrosis factor receptor superfamily, member 13B                 | CCDS11181.1     | chr17_16852079-16852079_C_T   | 140E>K | Substitution | Nonsynonymous coding | 11% |
| MM18T | TNFRSF18  | tumor necrosis factor receptor superfamily, member 18                  | CCDS9.1         | chr1_1139132-1139132_C_T      | 203A>T | Substitution | Nonsynonymous coding | 11% |
| MM18T | TNFSF13B  | tumor necrosis factor (ligand) superfamily, member 13b                 | CCDS9509.1      | chr13_108922687-108922687_G_T | ISV-1> | Substitution | Splice site acceptor | 13% |
| MM18T | TNFSF9    | tumor necrosis factor (ligand) superfamily, member 9                   | CCDS12169.1     | chr19_6534890-6534890_G_A     | 193R>Q | Substitution | Nonsynonymous coding | 10% |
| MM18T | TNIK      | TRAF2 and NCK interacting kinase                                       | CCDS46956.1     | chr3_170846583-170846583_G_T  | 565P>T | Substitution | Nonsynonymous coding | 12% |

|       |          |                                                                |                 |                               |         |              |                      |     |
|-------|----------|----------------------------------------------------------------|-----------------|-------------------------------|---------|--------------|----------------------|-----|
| MM18T | TNIP1    | TNFAIP3 interacting protein 1                                  | CCDS34280.1     | chr5_150425447-150425447_T_G  | 304K>T  | Substitution | Nonsynonymous coding | 12% |
| MM18T | TNIP1    | TNFAIP3 interacting protein 1                                  | CCDS34280.1     | chr5_150436459-150436459_C_A  | 165E>D  | Substitution | Nonsynonymous coding | 15% |
| MM18T | TNK2     | tyrosine kinase, non-receptor, 2                               | CCDS33927.1     | chr3_195605131-195605131_C_T  | 480E>K  | Substitution | Nonsynonymous coding | 19% |
| MM18T | TNN      | tenascin N                                                     | CCDS30943.1     | chr1_175113585-175113585_G_A  | 1220A>T | Substitution | Nonsynonymous coding | 15% |
| MM18T | TNNI3K   | TNNI3 interacting kinase                                       | CCDS5663.1      | chr1_74671400-74671400_A_C    | 557N>H  | Substitution | Nonsynonymous coding | 17% |
| MM18T | TNP1     | transition protein 1 (during histone to protamine replacement) | CCDS2406.1      | chr2_217724705-217724705_C_T  | 18R>Q   | Substitution | Nonsynonymous coding | 12% |
| MM18T | TNPO3    | transportin 3                                                  | CCDS5809.1      | chr7_128657106-128657106_G_T  | 109A>D  | Substitution | Nonsynonymous coding | 10% |
| MM18T | TNR      | tenascin R                                                     | CCDS1318.1      | chr1_175334387-175334387_A_C  | 782F>L  | Substitution | Nonsynonymous coding | 13% |
| MM18T | TNR      | tenascin R                                                     | CCDS1318.1      | chr1_175335019-175335019_G_T  | 770A>D  | Substitution | Nonsynonymous coding | 13% |
| MM18T | TNS3     | tensin 3                                                       | CCDS5506.2      | chr7_47331603-47331603_G_A    | 1293S>F | Substitution | Nonsynonymous coding | 19% |
| MM18T | TNS3     | tensin 3                                                       | CCDS5506.2      | chr7_47436475-47436475_C_T    | 316G>S  | Substitution | Nonsynonymous coding | 17% |
| MM18T | TOP1     | topoisomerase (DNA) I                                          | CCDS13312.1     | chr20_39657718-39657718_A_G   | 4D>G    | Substitution | Nonsynonymous coding | 14% |
| MM18T | TOP1MT   | topoisomerase (DNA) I, mitochondrial                           | CCDS6400.1      | chr8_144398249-144398249_G_A  | 460R>X  | Substitution | Nonsense             | 12% |
| MM18T | TOP2A    | topoisomerase (DNA) II alpha 170kDa                            | CCDS45672.1     | chr17_38561114-38561114_C_A   | 659D>Y  | Substitution | Nonsynonymous coding | 14% |
| MM18T | TOP2A    | topoisomerase (DNA) II alpha 170kDa                            | CCDS45672.1     | chr17_38548317-38548317_T_C   | ISV+3>  | Substitution | Splice site donor    | 14% |
| MM18T | TOPAZ1   | testis and ovary specific PAZ domain containing 1              | CCDS46809.1     | chr3_44284438-44284438_C_T    | 147S>F  | Substitution | Nonsynonymous coding | 21% |
| MM18T | TOPBP1   | topoisomerase (DNA) II binding protein 1                       | CCDS46919.1     | chr3_133327507-133327507_C_A  | 1433E>X | Substitution | Nonsense             | 17% |
| MM18T | TOR1AIP2 | torsin A interacting protein 2                                 | CCDS1334.1      | chr1_179815703-179815703_C_A  | 306E>X  | Substitution | Nonsense             | 13% |
| MM18T | TOX      | thymocyte selection-associated high mobility group box         | CCDS34897.1     | chr8_59852088-59852088_T_G    | 62S>R   | Substitution | Nonsynonymous coding | 16% |
| MM18T | TOX3     | TOX high mobility group box family member 3                    | NM_001080430    | chr16_52478261-52478261_T_G   | 305K>T  | Substitution | Nonsynonymous coding | 11% |
| MM18T | TOX4     | TOX high mobility group box family member 4                    | CCDS32043.1     | chr14_21956944-21956944_C_T   | 172R>C  | Substitution | Nonsynonymous coding | 10% |
| MM18T | TOX4     | TOX high mobility group box family member 4                    | CCDS32043.1     | chr14_21961100-21961100_G_A   | 442R>Q  | Substitution | Nonsynonymous coding | 11% |
| MM18T | TP53     | tumor protein p53                                              | CCDS11118.1     | chr17_7577121-7577121_G_A     | 273R>C  | Substitution | Nonsynonymous coding | 11% |
| MM18T | TP53     | tumor protein p53                                              | CCDS11118.1     | chr17_7578212-7578212_G_A     | 213R>X  | Substitution | Nonsense             | 16% |
| MM18T | TP53BP1  | tumor protein p53 binding protein 1                            | ENST00000434595 | chr15_43704904-43704904_G_T   | 77S>Y   | Substitution | Nonsynonymous coding | 10% |
| MM18T | TP53RK   | TP53 regulating kinase                                         | CCDS13401.1     | chr20_45315813-45315813_T_C   | 114E>G  | Substitution | Nonsynonymous coding | 12% |
| MM18T | TP73     | tumor protein p73                                              | CCDS49.1        | chr1_3624358-3624358_G_T      | NA      | Substitution | Splice site donor    | 12% |
| MM18T | TPBG     | trophoblast glycoprotein                                       | CCDS4995.1      | chr6_83075087-83075087_G_A    | 137A>T  | Substitution | Nonsynonymous coding | 22% |
| MM18T | TPBG     | trophoblast glycoprotein                                       | CCDS4995.1      | chr6_83075183-83075183_G_A    | 169V>I  | Substitution | Nonsynonymous coding | 19% |
| MM18T | TPBG     | trophoblast glycoprotein                                       | CCDS4995.1      | chr6_83075412-83075412_C_T    | 245S>L  | Substitution | Nonsynonymous coding | 13% |
| MM18T | TPCN1    | two pore segment channel 1                                     | CCDS44985.1     | chr12_113698196-113698196_G_A | 118D>N  | Substitution | Nonsynonymous coding | 14% |
| MM18T | TPM3     | tropomyosin 3                                                  | CCDS41403.1     | chr1_154143934-154143934_C_A  | 199K>N  | Substitution | Nonsynonymous coding | 10% |

|       |          |                                                        |                 |                               |         |              |                      |     |
|-------|----------|--------------------------------------------------------|-----------------|-------------------------------|---------|--------------|----------------------|-----|
| MM18T | TPO      | thyroid peroxidase                                     | CCDS1643.1      | chr2_1480933-1480933_G_A      | 299G>R  | Substitution | Nonsynonymous coding | 17% |
| MM18T | TPP2     | tripeptidyl peptidase II                               | CCDS9502.1      | chr13_103301305-103301305_C_T | 893R>C  | Substitution | Nonsynonymous coding | 12% |
| MM18T | TPP2     | tripeptidyl peptidase II                               | CCDS9502.1      | chr13_103317253-103317253_C_T | 1104P>S | Substitution | Nonsynonymous coding | 12% |
| MM18T | TPR      | translocated promoter region, nuclear basket protein   | CCDS41446.1     | chr1_186303586-186303586_C_A  | 1685A>S | Substitution | Nonsynonymous coding | 14% |
| MM18T | TPRKB    | TP53RK binding protein                                 | CCDS1927.1      | chr2_73959348-73959348_T_G    | 69K>T   | Substitution | Nonsynonymous coding | 14% |
| MM18T | TRABD    | TraB domain containing                                 | CCDS14086.1     | chr22_50636572-50636572_G_A   | 305E>K  | Substitution | Nonsynonymous coding | 10% |
| MM18T | TRABD2A  | TraB domain containing 2A                              | CCDS46349.1     | chr2_85097903-85097903_C_T    | 39E>K   | Substitution | Nonsynonymous coding | 11% |
| MM18T | TRAC     | T cell receptor alpha constant                         | ENST00000442641 | chr14_23016483-23016483_G_A   | 153R>K  | Substitution | Nonsynonymous coding | 13% |
| MM18T | TRAF2    | TNF receptor-associated factor 2                       | CCDS7013.1      | chr9_139794964-139794964_G_T  | 120E>X  | Substitution | Nonsense             | 19% |
| MM18T | TRAF3IP1 | TNF receptor-associated factor 3 interacting protein 1 | CCDS33415.1     | chr2_239258021-239258021_G_T  | 475D>Y  | Substitution | Nonsynonymous coding | 11% |
| MM18T | TRAK1    | trafficking protein, kinesin binding 1                 | CCDS43072.1     | chr3_42166929-42166929_G_A    | 37D>N   | Substitution | Nonsynonymous coding | 18% |
| MM18T | TRAK1    | trafficking protein, kinesin binding 1                 | CCDS43072.1     | chr3_42242539-42242539_G_A    | 474D>N  | Substitution | Nonsynonymous coding | 20% |
| MM18T | TRAK1    | trafficking protein, kinesin binding 1                 | CCDS43072.1     | chr3_42264946-42264946_G_A    | 860R>Q  | Substitution | Nonsynonymous coding | 17% |
| MM18T | TRAK2    | trafficking protein, kinesin binding 2                 | CCDS2347.1      | chr2_202264210-202264210_G_A  | 124R>C  | Substitution | Nonsynonymous coding | 12% |
| MM18T | TRAPPC13 | trafficking protein particle complex 13                | CCDS47221.1     | chr5_64960355-64960355_G_T    | 392D>Y  | Substitution | Nonsynonymous coding | 13% |
| MM18T | TRAPPC9  | trafficking protein particle complex 9                 | CCDS34946.1     | chr8_141310660-141310660_C_T  | 657S>N  | Substitution | Nonsynonymous coding | 12% |
| MM18T | TRAPPC9  | trafficking protein particle complex 9                 | CCDS34946.1     | chr8_141461265-141461265_C_T  | 168D>N  | Substitution | Nonsynonymous coding | 17% |
| MM18T | TRBV4-2  | T cell receptor beta variable 4-2                      | ENST00000390392 | chr7_142045632-142045632_T_C  | 54Y>H   | Substitution | Nonsynonymous coding | 10% |
| MM18T | TREM2    | triggering receptor expressed on myeloid cells 2       | CCDS4852.1      | chr6_41129099-41129099_C_T    | 98R>Q   | Substitution | Nonsynonymous coding | 14% |
| MM18T | TRERF1   | transcriptional regulating factor 1                    | CCDS4867.1      | chr6_42224839-42224839_G_A    | 780R>C  | Substitution | Nonsynonymous coding | 19% |
| MM18T | TRERF1   | transcriptional regulating factor 1                    | CCDS4867.1      | chr6_42231080-42231080_G_A    | 621S>L  | Substitution | Nonsynonymous coding | 19% |
| MM18T | TRERF1   | transcriptional regulating factor 1                    | CCDS4867.1      | chr6_42236454-42236454_G_A    | 292P>L  | Substitution | Nonsynonymous coding | 13% |
| MM18T | TRIL     | TLR4 interactor with leucine-rich repeats              | NM_014817       | chr7_28996204-28996204_G_A    | 487R>W  | Substitution | Nonsynonymous coding | 20% |
| MM18T | TRIM10   | tripartite motif containing 10                         | CCDS34375.1     | chr6_30122200-30122200_C_T    | 331R>Q  | Substitution | Nonsynonymous coding | 18% |
| MM18T | TRIM11   | tripartite motif containing 11                         | CCDS31048.1     | chr1_228594183-228594183_A_G  | 27V>A   | Substitution | Nonsynonymous coding | 22% |
| MM18T | TRIM14   | tripartite motif containing 14                         | CCDS6734.1      | chr9_100872194-100872194_C_A  | 94E>X   | Substitution | Nonsense             | 13% |
| MM18T | TRIM16   | tripartite motif containing 16                         | ENST00000261644 | chr17_15517061-15517061__A    | NA      | Insertion    | Frameshift           | 11% |
| MM18T | TRIM2    | tripartite motif containing 2                          | CCDS3781.2      | chr4_154236672-154236672_C_A  | 516L>I  | Substitution | Nonsynonymous coding | 13% |
| MM18T | TRIM23   | tripartite motif containing 23                         | CCDS3987.1      | chr5_64910018-64910018_T_G    | 91K>N   | Substitution | Nonsynonymous coding | 15% |
| MM18T | TRIM25   | tripartite motif containing 25                         | CCDS11591.1     | chr17_54972763-54972763_G_T   | 435S>Y  | Substitution | Nonsynonymous coding | 11% |
| MM18T | TRIM27   | tripartite motif containing 27                         | CCDS4654.1      | chr6_28889730-28889730_C_A    | 152R>I  | Substitution | Nonsynonymous coding | 13% |
| MM18T | TRIM29   | tripartite motif containing 29                         | CCDS8428.1      | chr11_120008434-120008434_C_A | 102K>N  | Substitution | Nonsynonymous coding | 11% |

|       |         |                                                                                       |             |                              |         |              |                      |     |
|-------|---------|---------------------------------------------------------------------------------------|-------------|------------------------------|---------|--------------|----------------------|-----|
| MM18T | TRIM32  | tripartite motif containing 32                                                        | CCDS6817.1  | chr9_119460497-119460497_T_G | 159L>R  | Substitution | Nonsynonymous coding | 10% |
| MM18T | TRIM35  | tripartite motif containing 35                                                        | CCDS6056.2  | chr8_27156012-27156012_C_T   | 167R>H  | Substitution | Nonsynonymous coding | 15% |
| MM18T | TRIM46  | tripartite motif containing 46                                                        | CCDS1097.1  | chr1_155150676-155150676_C_A | 370L>I  | Substitution | Nonsynonymous coding | 11% |
| MM18T | TRIM62  | tripartite motif containing 62                                                        | CCDS376.1   | chr1_33612894-33612894_G_A   | 438L>F  | Substitution | Nonsynonymous coding | 16% |
| MM18T | TRIM67  | tripartite motif containing 67                                                        | CCDS44333.1 | chr1_231299091-231299091_C_T | 126R>C  | Substitution | Nonsynonymous coding | 13% |
| MM18T | TRIM67  | tripartite motif containing 67                                                        | CCDS44333.1 | chr1_231334842-231334842_T_G | 397L>R  | Substitution | Nonsynonymous coding | 16% |
| MM18T | TRIML1  | tripartite motif family-like 1                                                        | CCDS3851.1  | chr4_189067985-189067985_C_A | 289T>K  | Substitution | Nonsynonymous coding | 17% |
| MM18T | TRIML1  | tripartite motif family-like 1                                                        | CCDS3851.1  | chr4_189068317-189068317_G_A | 400V>I  | Substitution | Nonsynonymous coding | 17% |
| MM18T | TRIO    | trio Rho guanine nucleotide exchange factor                                           | CCDS3883.1  | chr5_14399178-14399178_T_G   | 1538F>C | Substitution | Nonsynonymous coding | 17% |
| MM18T | TRIOBP  | TRIO and F-actin binding protein                                                      | CCDS43015.1 | chr22_38130508-38130508_C_A  | 1389L>I | Substitution | Nonsynonymous coding | 11% |
| MM18T | TRIOBP  | TRIO and F-actin binding protein                                                      | CCDS43015.1 | chr22_38155197-38155197_C_A  | 2084L>I | Substitution | Nonsynonymous coding | 13% |
| MM18T | TRIP11  | thyroid hormone receptor interactor 11                                                | CCDS9899.1  | chr14_92488172-92488172_C_A  | 106E>X  | Substitution | Nonsense             | 13% |
| MM18T | TRIP12  | thyroid hormone receptor interactor 12                                                | CCDS33391.1 | chr2_230632329-230632329_T_C | 1974M>V | Substitution | Nonsynonymous coding | 12% |
| MM18T | TRIP4   | thyroid hormone receptor interactor 4                                                 | CCDS10194.1 | chr15_64687623-64687623_G_A  | 100D>N  | Substitution | Nonsynonymous coding | 18% |
| MM18T | TRMT12  | tRNA methyltransferase 12 homolog (S. cerevisiae)                                     | CCDS6349.1  | chr8_125463247-125463247_C_T | 27P>S   | Substitution | Nonsynonymous coding | 13% |
| MM18T | TRMT1L  | tRNA methyltransferase 1 homolog (S. cerevisiae)-like                                 | CCDS1366.1  | chr1_185108617-185108617_T_C | 402I>V  | Substitution | Nonsynonymous coding | 15% |
| MM18T | TRMT6   | tRNA methyltransferase 6 homolog (S. cerevisiae)                                      | CCDS13093.1 | chr20_5923334-5923334_C_A    | 256E>X  | Substitution | Nonsense             | 13% |
| MM18T | TRO     | trophinin                                                                             | CCDS43959.1 | chrX_54949522-54949522_T_A   | 186I>N  | Substitution | Nonsynonymous coding | 10% |
| MM18T | TRO     | trophinin                                                                             | CCDS43959.1 | chrX_54956713-54956713_A_C   | 1186S>R | Substitution | Nonsynonymous coding | 13% |
| MM18T | TRPC1   | transient receptor potential cation channel, subfamily C, member 1                    | CCDS3126.1  | chr3_142467113-142467113_G_A | 114R>Q  | Substitution | Nonsynonymous coding | 23% |
| MM18T | TRPC3   | transient receptor potential cation channel, subfamily C, member 3                    | CCDS47130.1 | chr4_122831369-122831369_C_T | 578V>I  | Substitution | Nonsynonymous coding | 20% |
| MM18T | TRPC4AP | transient receptor potential cation channel, subfamily C, member 4 associated protein | CCDS13246.1 | chr20_33596513-33596513_G_A  | 517R>C  | Substitution | Nonsynonymous coding | 18% |
| MM18T | TRPC7   | transient receptor potential cation channel, subfamily C, member 7                    | NM_020389   | chr5_135583247-135583247_A_C | 586F>V  | Substitution | Nonsynonymous coding | 11% |
| MM18T | TRPC7   | transient receptor potential cation channel, subfamily C, member 7                    | NM_020389   | chr5_135587426-135587426_G_A | 497T>M  | Substitution | Nonsynonymous coding | 12% |
| MM18T | TRPC7   | transient receptor potential cation channel, subfamily C, member 7                    | NM_020389   | chr5_135602025-135602025_A_C | 410F>V  | Substitution | Nonsynonymous coding | 14% |
| MM18T | TRPC7   | transient receptor potential cation channel, subfamily C, member 7                    | NM_020389   | chr5_135692334-135692334_C_T | 248E>K  | Substitution | Nonsynonymous coding | 18% |
| MM18T | TRPC7   | transient receptor potential cation channel, subfamily C, member 7                    | NM_020389   | chr5_135692463-135692463_C_T | 205E>K  | Substitution | Nonsynonymous coding | 15% |
| MM18T | TRPM1   | transient receptor potential cation channel, subfamily M, member 1                    | CCDS10024.2 | chr15_31332497-31332497_C_T  | 692E>K  | Substitution | Nonsynonymous coding | 12% |
| MM18T | TRPM1   | transient receptor potential cation channel, subfamily M, member 1                    | CCDS10024.2 | chr15_31334356-31334356_G_A  | 607R>W  | Substitution | Nonsynonymous coding | 17% |
| MM18T | TRPM1   | transient receptor potential cation channel, subfamily M, member 1                    | CCDS10024.2 | chr15_31341661-31341661_C_T  | 475D>N  | Substitution | Nonsynonymous coding | 15% |
| MM18T | TRPM2   | transient receptor potential cation channel, subfamily M, member 2                    | CCDS13710.1 | chr21_45815402-45815402_C_A  | 634R>S  | Substitution | Nonsynonymous coding | 13% |
| MM18T | TRPM2   | transient receptor potential cation channel, subfamily M, member 2                    | CCDS13710.1 | chr21_45817668-45817668_G_T  | 657K>N  | Substitution | Nonsynonymous coding | 14% |

|       |         |                                                                    |             |                              |         |              |                      |     |
|-------|---------|--------------------------------------------------------------------|-------------|------------------------------|---------|--------------|----------------------|-----|
| MM18T | TRPM2   | transient receptor potential cation channel, subfamily M, member 2 | CCDS13710.1 | chr21_45833849-45833849_C_T  | 1013A>V | Substitution | Nonsynonymous coding | 11% |
| MM18T | TRPM3   | transient receptor potential cation channel, subfamily M, member 3 | CCDS43835.1 | chr9_73151486-73151486_G_A   | 1503R>C | Substitution | Nonsynonymous coding | 19% |
| MM18T | TRPM3   | transient receptor potential cation channel, subfamily M, member 3 | CCDS43835.1 | chr9_73152170-73152170_G_A   | 1275R>W | Substitution | Nonsynonymous coding | 19% |
| MM18T | TRPM5   | transient receptor potential cation channel, subfamily M, member 5 | CCDS31340.1 | chr11_2436608-2436608_C_T    | 408D>N  | Substitution | Nonsynonymous coding | 11% |
| MM18T | TRPM7   | transient receptor potential cation channel, subfamily M, member 7 | CCDS42035.1 | chr15_50899423-50899423_T_C  | 895T>A  | Substitution | Nonsynonymous coding | 13% |
| MM18T | TRPM8   | transient receptor potential cation channel, subfamily M, member 8 | CCDS33407.1 | chr2_234891703-234891703_G_A | 866D>N  | Substitution | Nonsynonymous coding | 10% |
| MM18T | TRPV1   | transient receptor potential cation channel, subfamily V, member 1 | CCDS45576.1 | chr17_3494490-3494490_C_T    | 148E>K  | Substitution | Nonsynonymous coding | 18% |
| MM18T | TRPV2   | transient receptor potential cation channel, subfamily V, member 2 | CCDS32576.1 | chr17_16326099-16326099_G_T  | 174R>M  | Substitution | Nonsynonymous coding | 13% |
| MM18T | TRPV5   | transient receptor potential cation channel, subfamily V, member 5 | CCDS5875.1  | chr7_142626552-142626552_C_T | 153R>H  | Substitution | Nonsynonymous coding | 18% |
| MM18T | TRPV6   | transient receptor potential cation channel, subfamily V, member 6 | CCDS5874.1  | chr7_142573318-142573318_C_G | 342C>S  | Substitution | Nonsynonymous coding | 14% |
| MM18T | TRPV6   | transient receptor potential cation channel, subfamily V, member 6 | CCDS5874.1  | chr7_142583194-142583194_A_G | 23F>S   | Substitution | Nonsynonymous coding | 15% |
| MM18T | TRRAP   | transformation/transcription domain-associated protein             | CCDS5659.1  | chr7_98515138-98515138_C_A   | 820L>I  | Substitution | Nonsynonymous coding | 14% |
| MM18T | TSC2    | tuberous sclerosis 2                                               | CCDS10458.1 | chr16_2112596-2112596_C_A    | 452F>L  | Substitution | Nonsynonymous coding | 26% |
| MM18T | TSC2    | tuberous sclerosis 2                                               | CCDS10458.1 | chr16_2122297-2122297_G_A    | 718R>H  | Substitution | Nonsynonymous coding | 10% |
| MM18T | TSC22D1 | TSC22 domain family, member 1                                      | CCDS31966.1 | chr13_45008812-45008812_T_C  | 1058T>A | Substitution | Nonsynonymous coding | 18% |
| MM18T | TSC22D2 | TSC22 domain family, member 2                                      | CCDS3149.1  | chr3_150127592-150127592_C_A | 152S>Y  | Substitution | Nonsynonymous coding | 11% |
| MM18T | TSC22D3 | TSC22 domain family, member 3                                      | CCDS14530.1 | chrX_106957756-106957756_G_A | 199A>V  | Substitution | Nonsynonymous coding | 10% |
| MM18T | TSC22D4 | TSC22 domain family, member 4                                      | CCDS5695.1  | chr7_100075537-100075537_C_T | 42R>H   | Substitution | Nonsynonymous coding | 31% |
| MM18T | TSGA10  | testis specific, 10                                                | CCDS2037.1  | chr2_99681553-99681553_C_T   | 418R>Q  | Substitution | Nonsynonymous coding | 11% |
| MM18T | TSHR    | thyroid stimulating hormone receptor                               | CCDS9872.1  | chr14_81534668-81534668_C_A  | 105H>N  | Substitution | Nonsynonymous coding | 12% |
| MM18T | TSHZ3   | teashirt zinc finger homeobox 3                                    | CCDS12421.2 | chr19_31769280-31769280_T_G  | 473E>D  | Substitution | Nonsynonymous coding | 13% |
| MM18T | TSN     | translin                                                           | CCDS33284.1 | chr2_122516312-122516312_G_T | 63E>X   | Substitution | Nonsense             | 10% |
| MM18T | TSNARE1 | t-SNARE domain containing 1                                        | CCDS6384.1  | chr8_143425534-143425534_C_T | 180D>N  | Substitution | Nonsynonymous coding | 12% |
| MM18T | TSPYL2  | TSPY-like 2                                                        | CCDS14350.1 | chrX_53114451-53114451_C_A   | 396L>M  | Substitution | Nonsynonymous coding | 10% |
| MM18T | TSPYL5  | TSPY-like 5                                                        | CCDS34927.1 | chr8_98290030-98290030_T_G   | 15N>H   | Substitution | Nonsynonymous coding | 19% |
| MM18T | TSR2    | TSR2, 20S rRNA accumulation, homolog (S. cerevisiae)               | CCDS14358.1 | chrX_54470529-54470529_G_A   | 118R>K  | Substitution | Nonsynonymous coding | 12% |
| MM18T | TTBK1   | tau tubulin kinase 1                                               | CCDS34455.1 | chr6_43227327-43227327_G_A   | 436R>H  | Substitution | Nonsynonymous coding | 17% |
| MM18T | TTC13   | tetratricopeptide repeat domain 13                                 | CCDS1588.1  | chr1_231076196-231076196_A_T | 260F>Y  | Substitution | Nonsynonymous coding | 13% |
| MM18T | TTC13   | tetratricopeptide repeat domain 13                                 | CCDS1588.1  | chr1_231079560-231079560_G_A | 222R>X  | Substitution | Nonsense             | 14% |
| MM18T | TTC17   | tetratricopeptide repeat domain 17                                 | CCDS31466.1 | chr11_43418954-43418954_C_A  | 277F>L  | Substitution | Nonsynonymous coding | 12% |
| MM18T | TTC17   | tetratricopeptide repeat domain 17                                 | CCDS31466.1 | chr11_43469611-43469611_C_T  | 909R>C  | Substitution | Nonsynonymous coding | 14% |
| MM18T | TTC23L  | tetratricopeptide repeat domain 23-like                            | NM_144725   | chr5_34845705-34845705_A_G   | 61D>G   | Substitution | Nonsynonymous coding | 12% |

|       |         |                                                |                 |                               |         |              |                      |     |
|-------|---------|------------------------------------------------|-----------------|-------------------------------|---------|--------------|----------------------|-----|
| MM18T | TTC26   | tetratricopeptide repeat domain 26             | CCDS5852.1      | chr7_138832955-138832955_A_C  | 183E>D  | Substitution | Nonsynonymous coding | 11% |
| MM18T | TTC28   | tetratricopeptide repeat domain 28             | CCDS46678.1     | chr22_28379818-28379818_C_T   | 1946R>H | Substitution | Nonsynonymous coding | 11% |
| MM18T | TTC3    | tetratricopeptide repeat domain 3              | CCDS13651.1     | chr21_38538652-38538652_A_C   | 1379K>T | Substitution | Nonsynonymous coding | 11% |
| MM18T | TTC38   | tetratricopeptide repeat domain 38             | CCDS43030.1     | chr22_46681141-46681141_G_A   | 267E>K  | Substitution | Nonsynonymous coding | 14% |
| MM18T | TTC39A  | tetratricopeptide repeat domain 39A            | CCDS44143.1     | chr1_51768815-51768815_C_T    | 239R>H  | Substitution | Nonsynonymous coding | 18% |
| MM18T | TTC40   | tetratricopeptide repeat domain 40             | ENST00000368582 | chr10_134686181-134686181_G_A | 1504R>W | Substitution | Nonsynonymous coding | 13% |
| MM18T | TTC40   | tetratricopeptide repeat domain 40             | ENST00000368582 | chr10_134732900-134732900_C_T | 593V>M  | Substitution | Nonsynonymous coding | 11% |
| MM18T | TTC40   | tetratricopeptide repeat domain 40             | ENST00000368582 | chr10_134736043-134736043_T_C | 476T>A  | Substitution | Nonsynonymous coding | 14% |
| MM18T | TTC40   | tetratricopeptide repeat domain 40             | ENST00000368582 | chr10_134736120-134736120_C_T | 450R>Q  | Substitution | Nonsynonymous coding | 11% |
| MM18T | TTC4P1  | tetratricopeptide repeat domain 4 pseudogene 1 | CCDS596.1       | chr1_55181640-55181640_A_C    | 20K>T   | Substitution | Nonsynonymous coding | 17% |
| MM18T | TTC6    | tetratricopeptide repeat domain 6              | ENST00000382320 | chr14_38281591-38281591_C_A   | 262R>S  | Substitution | Nonsynonymous coding | 18% |
| MM18T | TTC8    | tetratricopeptide repeat domain 8              | ENST00000338104 | chr14_89312941-89312941_G_T   | ISV-1>  | Substitution | Splice site acceptor | 14% |
| MM18T | TTC9C   | tetratricopeptide repeat domain 9C             | CCDS8033.1      | chr11_62502898-62502898_G_T   | 95E>X   | Substitution | Nonsense             | 13% |
| MM18T | TTL2    | tubulin tyrosine ligase-like family, member 2  | CCDS5301.1      | chr6_167754861-167754861_G_T  | 491E>D  | Substitution | Nonsynonymous coding | 14% |
| MM18T | TTL5    | tubulin tyrosine ligase-like family, member 5  | CCDS32124.1     | chr14_76186959-76186959_G_T   | 319D>Y  | Substitution | Nonsynonymous coding | 15% |
| MM18T | TTL6    | tubulin tyrosine ligase-like family, member 6  | CCDS45724.1     | chr17_46894416-46894416_G_T   | 7H>N    | Substitution | Nonsynonymous coding | 11% |
| MM18T | TTL7    | tubulin tyrosine ligase-like family, member 7  | CCDS690.2       | chr1_84376944-84376944_C_T    | 564E>K  | Substitution | Nonsynonymous coding | 15% |
| MM18T | TTL7    | tubulin tyrosine ligase-like family, member 7  | CCDS690.2       | chr1_84399373-84399373_G_T    | 322P>H  | Substitution | Nonsynonymous coding | 12% |
| MM18T | TTL7    | tubulin tyrosine ligase-like family, member 7  | CCDS690.2       | chr1_84415575-84415575_C_A    | 84E>D   | Substitution | Nonsynonymous coding | 16% |
| MM18T | TTN     | titin                                          | NM_133379       | chr2_179612600-179612600_G_A  | 4843P>S | Substitution | Nonsynonymous coding | 13% |
| MM18T | TTN     | titin                                          | NM_133379       | chr2_179612972-179612972_G_T  | 4719L>I | Substitution | Nonsynonymous coding | 11% |
| MM18T | TTN     | titin                                          | NM_133379       | chr2_179629338-179629338_A_C  | 3302F>V | Substitution | Nonsynonymous coding | 13% |
| MM18T | TTN     | titin                                          | NM_133379       | chr2_179641063-179641063_A_C  | 1843I>S | Substitution | Nonsynonymous coding | 15% |
| MM18T | TTN     | titin                                          | NM_133379       | chr2_179648472-179648472_G_T  | 939P>H  | Substitution | Nonsynonymous coding | 14% |
| MM18T | TTN     | titin                                          | NM_133379       | chr2_179669323-179669323_A_C  | 16V>G   | Substitution | Nonsynonymous coding | 15% |
| MM18T | TTPA    | tocopherol (alpha) transfer protein            | CCDS6178.1      | chr8_63998520-63998520_A_C    | 21S>A   | Substitution | Nonsynonymous coding | 20% |
| MM18T | TTPAL   | tocopherol (alpha) transfer protein-like       | CCDS13332.2     | chr20_43118148-43118148_G_A   | 332R>Q  | Substitution | Nonsynonymous coding | 14% |
| MM18T | TUB     | tubby homolog (mouse)                          | CCDS7786.1      | chr11_8119286-8119286_G_A     | 359R>K  | Substitution | Nonsynonymous coding | 10% |
| MM18T | TUBA8   | tubulin, alpha 8                               | CCDS13751.1     | chr22_18609668-18609668_G_T   | 308R>I  | Substitution | Nonsynonymous coding | 15% |
| MM18T | TUBE1   | tubulin, epsilon 1                             | CCDS5100.1      | chr6_112408627-112408627_G_T  | 4S>X    | Substitution | Nonsense             | 13% |
| MM18T | TUBGCP2 | tubulin, gamma complex associated protein 2    | CCDS7676.1      | chr10_135106136-135106136_C_T | 361D>N  | Substitution | Nonsynonymous coding | 17% |
| MM18T | TUBGCP3 | tubulin, gamma complex associated protein 3    | CCDS9525.1      | chr13_113223520-113223520_C_T | 44A>T   | Substitution | Nonsynonymous coding | 12% |

|       |         |                                                              |                 |                               |         |              |                      |     |
|-------|---------|--------------------------------------------------------------|-----------------|-------------------------------|---------|--------------|----------------------|-----|
| MM18T | TUFM    | Tu translation elongation factor, mitochondrial              | CCDS10642.1     | chr16_28857261-28857261_C_A   | 73K>N   | Substitution | Nonsynonymous coding | 22% |
| MM18T | TUFM    | Tu translation elongation factor, mitochondrial              | CCDS10642.1     | chr16_28857296-28857296_T_G   | 62N>H   | Substitution | Nonsynonymous coding | 11% |
| MM18T | TUSC1   | tumor suppressor candidate 1                                 | CCDS34999.1     | chr9_25677706-25677706_G_A    | 205S>L  | Substitution | Nonsynonymous coding | 22% |
| MM18T | TUSC3   | tumor suppressor candidate 3                                 | CCDS5994.1      | chr8_15480592-15480592_C_A    | 48L>I   | Substitution | Nonsynonymous coding | 15% |
| MM18T | TUSC3   | tumor suppressor candidate 3                                 | CCDS5994.1      | chr8_15517140-15517140_A_G    | 184D>G  | Substitution | Nonsynonymous coding | 13% |
| MM18T | TUSC5   | tumor suppressor candidate 5                                 | CCDS42225.1     | chr17_1198911-1198911_T_G     | 172F>V  | Substitution | Nonsynonymous coding | 14% |
| MM18T | TYRO3   | TYRO3 protein tyrosine kinase                                | CCDS10080.1     | chr15_41865579-41865579_C_T   | 687R>C  | Substitution | Nonsynonymous coding | 16% |
| MM18T | TYROBP  | TYRO protein tyrosine kinase binding protein                 | CCDS12482.1     | chr19_36395517-36395517_G_A   | 99S>L   | Substitution | Nonsynonymous coding | 15% |
| MM18T | TYRP1   | tyrosinase-related protein 1                                 | CCDS34990.1     | chr9_12695559-12695559_T_G    | 144F>V  | Substitution | Nonsynonymous coding | 26% |
| MM18T | TYW1B   | tRNA-yW synthesizing protein 1 homolog B (S. cerevisiae)     | ENST00000438904 | chr7_72277874-72277874_C_T    | 127D>N  | Substitution | Nonsynonymous coding | 16% |
| MM18T | U2SURP  | U2 snRNP-associated SURP domain containing                   | CCDS46928.1     | chr3_142754944-142754944_G_T  | 688E>X  | Substitution | Nonsense             | 14% |
| MM18T | UAP1    | UDP-N-actetylglucosamine pyrophosphorylase 1                 | CCDS1240.1      | chr1_162557403-162557403_G_T  | 325A>S  | Substitution | Nonsynonymous coding | 12% |
| MM18T | UBA1    | ubiquitin-like modifier activating enzyme 1                  | CCDS14275.1     | chrX_47060333-47060333_G_A    | 174R>Q  | Substitution | Nonsynonymous coding | 18% |
| MM18T | UBA1    | ubiquitin-like modifier activating enzyme 1                  | CCDS14275.1     | chrX_47061756-47061756_G_T    | ISV-1>  | Substitution | Splice site acceptor | 12% |
| MM18T | UBA5    | ubiquitin-like modifier activating enzyme 5                  | CCDS3076.1      | chr3_132379454-132379454_C_A  | 25L>M   | Substitution | Nonsynonymous coding | 16% |
| MM18T | UBALD2  | UBA-like domain containing 2                                 | CCDS11742.1     | chr17_74266456-74266456_C_T   | 122A>V  | Substitution | Nonsynonymous coding | 23% |
| MM18T | UBASH3B | ubiquitin associated and SH3 domain containing B             | CCDS31694.1     | chr11_122665433-122665433_C_T | 335S>L  | Substitution | Nonsynonymous coding | 11% |
| MM18T | UBD     | ubiquitin D                                                  | CCDS4662.1      | chr6_29523709-29523709_C_T    | 149G>D  | Substitution | Nonsynonymous coding | 11% |
| MM18T | UBE2R2  | ubiquitin-conjugating enzyme E2R 2                           | CCDS6546.1      | chr9_33917231-33917231_C_T    | 238S>L  | Substitution | Nonsynonymous coding | 15% |
| MM18T | UBE2Z   | ubiquitin-conjugating enzyme E2Z                             | CCDS11540.2     | chr17_46988180-46988180_T_C   | 110S>P  | Substitution | Nonsynonymous coding | 17% |
| MM18T | UBE4A   | ubiquitination factor E4A [Source:HGNC Symbol;Acc:12499]     | CCDS8396.1      | chr11_118239392-118239392_G_T | 56E>D   | Substitution | Nonsynonymous coding | 24% |
| MM18T | UBE4B   | ubiquitination factor E4B                                    | CCDS41245.1     | chr1_10155531-10155531_G_A    | 75R>Q   | Substitution | Nonsynonymous coding | 18% |
| MM18T | UBQLN2  | ubiquilin 2                                                  | CCDS14374.1     | chrX_56590491-56590491_C_T    | 62S>L   | Substitution | Nonsynonymous coding | 18% |
| MM18T | UBQLN2  | ubiquilin 2                                                  | CCDS14374.1     | chrX_56591469-56591469_C_T    | 388S>L  | Substitution | Nonsynonymous coding | 12% |
| MM18T | UBQLNL  | ubiquilin-like                                               | CCDS31385.1     | chr11_5536507-5536507_T_C     | 389T>A  | Substitution | Nonsynonymous coding | 14% |
| MM18T | UBR1    | ubiquitin protein ligase E3 component n-recogin 1            | CCDS10091.1     | chr15_43294807-43294807_G_A   | 1202S>F | Substitution | Nonsynonymous coding | 12% |
| MM18T | UBR1    | ubiquitin protein ligase E3 component n-recogin 1            | CCDS10091.1     | chr15_43335590-43335590_C_T   | 558E>K  | Substitution | Nonsynonymous coding | 16% |
| MM18T | UBR3    | ubiquitin protein ligase E3 component n-recogin 3 (putative) | CCDS2238.2      | chr2_170936513-170936513_A_C  | 1797S>R | Substitution | Nonsynonymous coding | 20% |
| MM18T | UBR4    | ubiquitin protein ligase E3 component n-recogin 4            | CCDS189.1       | chr1_19454788-19454788_G_T    | 3010L>M | Substitution | Nonsynonymous coding | 12% |
| MM18T | UBR4    | ubiquitin protein ligase E3 component n-recogin 4            | CCDS189.1       | chr1_19482105-19482105_A_G    | 2044S>P | Substitution | Nonsynonymous coding | 10% |
| MM18T | UBR4    | ubiquitin protein ligase E3 component n-recogin 4            | CCDS189.1       | chr1_19503107-19503107_A_C    | 918W>G  | Substitution | Nonsynonymous coding | 17% |
| MM18T | UBR5    | ubiquitin protein ligase E3 component n-recogin 5            | CCDS34933.1     | chr8_103323594-103323594_G_T  | 850S>Y  | Substitution | Nonsynonymous coding | 15% |



|       |          |                                                                                |                 |                               |         |              |                      |     |
|-------|----------|--------------------------------------------------------------------------------|-----------------|-------------------------------|---------|--------------|----------------------|-----|
| MM18T | UBR5     | ubiquitin protein ligase E3 component n-recognin 5                             | CCDS34933.1     | chr8_103359208-103359208_G_A  | 167R>X  | Substitution | Nonsense             | 21% |
| MM18T | UBR7     | ubiquitin protein ligase E3 component n-recognin 7 (putative)                  | CCDS9909.1      | chr14_93686607-93686607_G_T   | 325D>Y  | Substitution | Nonsynonymous coding | 17% |
| MM18T | UBTF     | upstream binding transcription factor, RNA polymerase I                        | CCDS11480.1     | chr17_42290651-42290651_C_A   | ISV-1>  | Substitution | Splice site acceptor | 19% |
| MM18T | UBXN2B   | UBX domain protein 2B                                                          | CCDS43741.1     | chr8_59343121-59343121_C_T    | 78R>X   | Substitution | Nonsense             | 21% |
| MM18T | UBXN7    | UBX domain protein 7                                                           | CCDS43191.1     | chr3_196089299-196089299_G_A  | 365P>L  | Substitution | Nonsynonymous coding | 14% |
| MM18T | UCN2     | urocortin 2                                                                    | CCDS2772.1      | chr3_48600283-48600283_G_C    | 92A>G   | Substitution | Nonsynonymous coding | 10% |
| MM18T | UFL1     | UFM1-specific ligase 1                                                         | CCDS5034.1      | chr6_96997335-96997335_C_A    | 523S>Y  | Substitution | Nonsynonymous coding | 10% |
| MM18T | UFL1     | UFM1-specific ligase 1                                                         | CCDS5034.1      | chr6_97001266-97001266_G_T    | 758D>Y  | Substitution | Nonsynonymous coding | 11% |
| MM18T | UGT3A1   | UDP glycosyltransferase 3 family, polypeptide A1                               | CCDS3913.1      | chr5_35965701-35965701_G_T    | 210F>L  | Substitution | Nonsynonymous coding | 13% |
| MM18T | UHRF1BP1 | UHRF1 binding protein 1                                                        | CCDS43455.1     | chr6_34803108-34803108_T_A    | 236F>Y  | Substitution | Nonsynonymous coding | 12% |
| MM18T | UHRF2    | ubiquitin-like with PHD and ring finger domains 2, E3 ubiquitin protein ligase | CCDS6469.1      | chr9_6497341-6497341_G_T      | 583R>I  | Substitution | Nonsynonymous coding | 16% |
| MM18T | ULK4     | unc-51-like kinase 4 (C. elegans)                                              | CCDS43071.1     | chr3_41954318-41954318_C_T    | 293V>I  | Substitution | Nonsynonymous coding | 10% |
| MM18T | UMOD     | uromodulin                                                                     | ENST00000396134 | chr16_20361135-20361135_C_T   | 49D>N   | Substitution | Nonsynonymous coding | 12% |
| MM18T | UNC13B   | unc-13 homolog B (C. elegans)                                                  | CCDS6579.1      | chr9_35231179-35231179_C_T    | 39R>C   | Substitution | Nonsynonymous coding | 11% |
| MM18T | UNC13B   | unc-13 homolog B (C. elegans)                                                  | CCDS6579.1      | chr9_35236569-35236569_C_T    | 86R>C   | Substitution | Nonsynonymous coding | 13% |
| MM18T | UNC13C   | unc-13 homolog C (C. elegans)                                                  | CCDS45264.1     | chr15_54586130-54586130_G_T   | 1286V>L | Substitution | Nonsynonymous coding | 11% |
| MM18T | UNC13C   | unc-13 homolog C (C. elegans)                                                  | CCDS45264.1     | chr15_54625971-54625971_T_G   | 1501F>V | Substitution | Nonsynonymous coding | 11% |
| MM18T | UNC45B   | unc-45 homolog B (C. elegans)                                                  | CCDS11292.1     | chr17_33481732-33481732_C_T   | 204S>L  | Substitution | Nonsynonymous coding | 30% |
| MM18T | UNC45B   | unc-45 homolog B (C. elegans)                                                  | CCDS11292.1     | chr17_33501341-33501341_A_C   | 639K>N  | Substitution | Nonsynonymous coding | 13% |
| MM18T | UNC50    | unc-50 homolog (C. elegans)                                                    | CCDS2035.1      | chr2_99226416-99226416_G_T    | 65R>I   | Substitution | Nonsynonymous coding | 12% |
| MM18T | UNC5B    | unc-5 homolog B (C. elegans)                                                   | CCDS7309.1      | chr10_73051434-73051434_G_A   | 514D>N  | Substitution | Nonsynonymous coding | 19% |
| MM18T | UNC79    | unc-79 homolog (C. elegans)                                                    | CCDS9911.2      | chr14_93944040-93944040_A_C   | 18E>D   | Substitution | Nonsynonymous coding | 10% |
| MM18T | UNC79    | unc-79 homolog (C. elegans)                                                    | CCDS9911.2      | chr14_94089061-94089061_G_A   | 1651E>K | Substitution | Nonsynonymous coding | 14% |
| MM18T | UNC93A   | unc-93 homolog A (C. elegans)                                                  | CCDS5300.1      | chr6_167717548-167717548_G_A  | 256R>H  | Substitution | Nonsynonymous coding | 14% |
| MM18T | UPF1     | UPF1 regulator of nonsense transcripts homolog (yeast)                         | CCDS12386.1     | chr19_18971795-18971795_C_T   | ISV+4>  | Substitution | Splice site donor    | 16% |
| MM18T | UPK1B    | uropodin 1B                                                                    | CCDS2985.1      | chr3_118917938-118917938_G_A  | 228R>Q  | Substitution | Nonsynonymous coding | 14% |
| MM18T | UPP2     | uridine phosphorylase 2                                                        | CCDS46435.1     | chr2_158974411-158974411_G_A  | 196D>N  | Substitution | Nonsynonymous coding | 14% |
| MM18T | UQCC     | ubiquinol-cytochrome c reductase complex chaperone                             | CCDS13252.1     | chr20_33891795-33891795_C_A   | 281K>N  | Substitution | Nonsynonymous coding | 19% |
| MM18T | URB1     | URB1 ribosome biogenesis 1 homolog (S. cerevisiae)                             | CCDS46645.1     | chr21_33750757-33750757_T_C   | 221K>E  | Substitution | Nonsynonymous coding | 17% |
| MM18T | URI1     | URI1, prefoldin-like chaperone                                                 | CCDS12420.1     | chr19_30502139-30502139_T_C   | 392Y>H  | Substitution | Nonsynonymous coding | 11% |
| MM18T | UROC1    | urocanate hydratase 1                                                          | CCDS3038.1      | chr3_126224648-126224648_C_T  | 237E>K  | Substitution | Nonsynonymous coding | 12% |
| MM18T | UROS     | uroporphyrinogen III synthase                                                  | CCDS7648.1      | chr10_127500845-127500845_G_T | 86S>Y   | Substitution | Nonsynonymous coding | 11% |

|       |        |                                                                         |             |                               |         |              |                      |     |
|-------|--------|-------------------------------------------------------------------------|-------------|-------------------------------|---------|--------------|----------------------|-----|
| MM18T | USH1G  | Usher syndrome 1G (autosomal recessive)                                 | CCDS32725.1 | chr17_72916549-72916549_T_C   | 128N>D  | Substitution | Nonsynonymous coding | 18% |
| MM18T | USHBP1 | Usher syndrome 1C binding protein 1                                     | CCDS12353.1 | chr19_17361048-17361048_C_A   | 700D>Y  | Substitution | Nonsynonymous coding | 19% |
| MM18T | USP1   | ubiquitin specific peptidase 1                                          | CCDS621.1   | chr1_62905614-62905614_A_C    | 26K>Q   | Substitution | Nonsynonymous coding | 15% |
| MM18T | USP13  | ubiquitin specific peptidase 13 (isopeptidase T-3)                      | CCDS3235.1  | chr3_179448499-179448499_T_C  | ISV+2>  | Substitution | Splice site donor    | 11% |
| MM18T | USP15  | ubiquitin specific peptidase 15                                         | CCDS8963.1  | chr12_62783657-62783657_C_T   | 549S>L  | Substitution | Nonsynonymous coding | 12% |
| MM18T | USP20  | ubiquitin specific peptidase 20                                         | CCDS43892.1 | chr9_132638497-132638497_G_A  | 797E>K  | Substitution | Nonsynonymous coding | 10% |
| MM18T | USP25  | ubiquitin specific peptidase 25                                         | CCDS33515.1 | chr21_17203753-17203753_G_A   | 600E>K  | Substitution | Nonsynonymous coding | 11% |
| MM18T | USP29  | ubiquitin specific peptidase 29                                         | CCDS33124.1 | chr19_57641810-57641810_T_G   | 589D>E  | Substitution | Nonsynonymous coding | 14% |
| MM18T | USP29  | ubiquitin specific peptidase 29                                         | CCDS33124.1 | chr19_57642738-57642738_C_T   | 899R>W  | Substitution | Nonsynonymous coding | 17% |
| MM18T | USP34  | ubiquitin specific peptidase 34                                         | CCDS42686.1 | chr2_61484460-61484460_G_T    | 1957P>H | Substitution | Nonsynonymous coding | 10% |
| MM18T | USP34  | ubiquitin specific peptidase 34                                         | CCDS42686.1 | chr2_61493172-61493172_G_T    | 1855S>Y | Substitution | Nonsynonymous coding | 10% |
| MM18T | USP36  | ubiquitin specific peptidase 36                                         | CCDS32755.1 | chr17_76831403-76831403_G_T   | 145P>H  | Substitution | Nonsynonymous coding | 17% |
| MM18T | USP38  | ubiquitin specific peptidase 38                                         | CCDS3758.1  | chr4_144133562-144133562_G_A  | 530R>K  | Substitution | Nonsynonymous coding | 14% |
| MM18T | USP38  | ubiquitin specific peptidase 38                                         | CCDS3758.1  | chr4_144118985-144118985_C_T  | 320R>X  | Substitution | Nonsense             | 11% |
| MM18T | USP40  | ubiquitin specific peptidase 40                                         | CCDS46547.1 | chr2_234394496-234394496_C_T  | 1120D>N | Substitution | Nonsynonymous coding | 15% |
| MM18T | USP40  | ubiquitin specific peptidase 40                                         | CCDS46547.1 | chr2_234463133-234463133_A_G  | 208S>P  | Substitution | Nonsynonymous coding | 19% |
| MM18T | USP42  | ubiquitin specific peptidase 42                                         | CCDS47535.1 | chr7_6150942-6150942_G_A      | 60A>T   | Substitution | Nonsynonymous coding | 12% |
| MM18T | USP46  | ubiquitin specific peptidase 46                                         | CCDS47053.1 | chr4_53494230-53494230_T_G    | 73K>T   | Substitution | Nonsynonymous coding | 19% |
| MM18T | USP47  | ubiquitin specific peptidase 47                                         | CCDS41619.1 | chr11_11964608-11964608_T_G   | 946F>V  | Substitution | Nonsynonymous coding | 16% |
| MM18T | USP51  | ubiquitin specific peptidase 51                                         | NM_201286   | chrX_55515350-55515350_G_T    | 8S>Y    | Substitution | Nonsynonymous coding | 15% |
| MM18T | USP54  | ubiquitin specific peptidase 54                                         | CCDS7329.2  | chr10_75301252-75301252_G_A   | 236R>C  | Substitution | Nonsynonymous coding | 10% |
| MM18T | USP8   | ubiquitin specific peptidase 8                                          | CCDS10137.1 | chr15_50776547-50776547_G_A   | 627E>K  | Substitution | Nonsynonymous coding | 11% |
| MM18T | USP8   | ubiquitin specific peptidase 8                                          | CCDS10137.1 | chr15_50782492-50782492_T_G   | 668Y>X  | Substitution | Nonsense             | 16% |
| MM18T | USP9X  | ubiquitin specific peptidase 9, X-linked                                | CCDS43930.1 | chrX_41029282-41029282_C_T    | 891R>X  | Substitution | Nonsense             | 24% |
| MM18T | UST    | uronyl-2-sulfotransferase                                               | CCDS5213.1  | chr6_149395160-149395160_T_G  | 377F>V  | Substitution | Nonsynonymous coding | 11% |
| MM18T | UTP11L | UTP11-like, U3 small nucleolar ribonucleoprotein, (yeast)               | CCDS429.1   | chr1_38483429-38483429_G_T    | 72R>L   | Substitution | Nonsynonymous coding | 10% |
| MM18T | UTP20  | UTP20, small subunit (SSU) processome component, homolog (yeast)        | CCDS9081.1  | chr12_101723063-101723063_T_G | 1085L>V | Substitution | Nonsynonymous coding | 14% |
| MM18T | UTP20  | UTP20, small subunit (SSU) processome component, homolog (yeast)        | CCDS9081.1  | chr12_101731917-101731917_C_A | 1244L>I | Substitution | Nonsynonymous coding | 11% |
| MM18T | UTP3   | UTP3, small subunit (SSU) processome component, homolog (S. cerevisiae) | CCDS3546.1  | chr4_71555800-71555800_G_A    | 469R>H  | Substitution | Nonsynonymous coding | 16% |
| MM18T | UTP6   | UTP6, small subunit (SSU) processome component, homolog (yeast)         | CCDS11269.1 | chr17_30200436-30200436_C_T   | 486R>Q  | Substitution | Nonsynonymous coding | 13% |
| MM18T | UTRN   | utrophin                                                                | CCDS34547.1 | chr6_144780421-144780421_G_A  | 880D>N  | Substitution | Nonsynonymous coding | 12% |
| MM18T | UTS2D  | urotensin 2 domain containing                                           | CCDS3300.1  | chr3_190993119-190993119_C_A  | 86E>X   | Substitution | Nonsense             | 10% |

|       |         |                                                                                   |                 |                               |         |              |                      |     |
|-------|---------|-----------------------------------------------------------------------------------|-----------------|-------------------------------|---------|--------------|----------------------|-----|
| MM18T | UTS2R   | urotensin 2 receptor                                                              | CCDS11810.1     | chr17_80332642-80332642_C_T   | 148R>C  | Substitution | Nonsynonymous coding | 12% |
| MM18T | UVRAG   | UV radiation resistance associated                                                | CCDS8241.1      | chr11_75562946-75562946_C_T   | 46R>W   | Substitution | Nonsynonymous coding | 10% |
| MM18T | UVSSA   | UV-stimulated scaffold protein A                                                  | CCDS33938.1     | chr4_1348546-1348546_G_A      | 320E>K  | Substitution | Nonsynonymous coding | 23% |
| MM18T | VAPA    | VAMP (vesicle-associated membrane protein)-associated protein A, 33kDa            | CCDS11847.2     | chr18_9914317-9914317_G_T     | 22D>Y   | Substitution | Nonsynonymous coding | 20% |
| MM18T | VASH1   | vasohibin 1                                                                       | CCDS9851.1      | chr14_77237580-77237580_C_A   | 149P>H  | Substitution | Nonsynonymous coding | 17% |
| MM18T | VASH1   | vasohibin 1                                                                       | CCDS9851.1      | chr14_77242311-77242311_C_T   | 203R>C  | Substitution | Nonsynonymous coding | 15% |
| MM18T | VASN    | vasorin                                                                           | CCDS10514.1     | chr16_4431012-4431012_C_T     | 45T>M   | Substitution | Nonsynonymous coding | 20% |
| MM18T | VAT1L   | vesicle amine transport protein 1 homolog (T. californica)-like                   | CCDS32492.1     | chr16_77822600-77822600_G_T   | 7E>D    | Substitution | Nonsynonymous coding | 10% |
| MM18T | VAV2    | vav 2 guanine nucleotide exchange factor                                          | CCDS48053.1     | chr9_136637099-136637099_C_A  | 735K>N  | Substitution | Nonsynonymous coding | 28% |
| MM18T | VCAM1   | vascular cell adhesion molecule 1                                                 | CCDS773.1       | chr1_101196860-101196860_G_T  | 437E>D  | Substitution | Nonsynonymous coding | 16% |
| MM18T | VCAN    | versican                                                                          | CCDS4060.1      | chr5_82808056-82808056_G_A    | 295D>N  | Substitution | Nonsynonymous coding | 10% |
| MM18T | VCAN    | versican                                                                          | CCDS4060.1      | chr5_82816079-82816079_G_A    | 652E>K  | Substitution | Nonsynonymous coding | 11% |
| MM18T | VCAN    | versican                                                                          | CCDS4060.1      | chr5_82835173-82835173_G_T    | 2117E>D | Substitution | Nonsynonymous coding | 11% |
| MM18T | VCAN    | versican                                                                          | CCDS4060.1      | chr5_82837861-82837861_A_C    | 3013E>D | Substitution | Nonsynonymous coding | 13% |
| MM18T | VCP     | valosin containing protein                                                        | CCDS6573.1      | chr9_35067957-35067957_G_T    | 78S>Y   | Substitution | Nonsynonymous coding | 19% |
| MM18T | VCPIP1  | valosin containing protein (p97)/p47 complex interacting protein 1                | CCDS6192.1      | chr8_67578738-67578738_C_A    | 152M>I  | Substitution | Nonsynonymous coding | 14% |
| MM18T | VDAC2   | voltage-dependent anion channel 2                                                 | CCDS7348.1      | chr10_76980503-76980503_A_C   | 120K>T  | Substitution | Nonsynonymous coding | 16% |
| MM18T | VDR     | vitamin D (1,25- dihydroxyvitamin D3) receptor                                    | CCDS8757.1      | chr12_48251023-48251023_G_A   | 158R>C  | Substitution | Nonsynonymous coding | 14% |
| MM18T | VEGFC   | vascular endothelial growth factor C                                              | NM_005429       | chr4_177605168-177605168_C_T  | 391R>H  | Substitution | Nonsynonymous coding | 14% |
| MM18T | VENTX   | VENT homeobox                                                                     | CCDS7675.1      | chr10_135053520-135053520_C_A | 163L>I  | Substitution | Nonsynonymous coding | 20% |
| MM18T | VIP     | vasoactive intestinal peptide                                                     | CCDS5240.1      | chr6_153075329-153075329_G_T  | 46A>S   | Substitution | Nonsynonymous coding | 17% |
| MM18T | VIPAS39 | VPS33B interacting protein, apical-basolateral polarity regulator, spe-39 homolog | CCDS9862.1      | chr14_77920376-77920376_C_T   | 24D>N   | Substitution | Nonsynonymous coding | 11% |
| MM18T | VMA21   | VMA21 vacuolar H+-ATPase homolog (S. cerevisiae)                                  | ENST00000370361 | chrX_150565345-150565345_G_A  | 12D>N   | Substitution | Nonsynonymous coding | 14% |
| MM18T | VPRBP   | Vpr (HIV-1) binding protein                                                       | NM_014703       | chr3_51475632-51475632_C_A    | 265K>N  | Substitution | Nonsynonymous coding | 10% |
| MM18T | VPS13A  | vacuolar protein sorting 13 homolog A (S. cerevisiae)                             | CCDS6655.1      | chr9_79968394-79968394_C_T    | 2497R>C | Substitution | Nonsynonymous coding | 21% |
| MM18T | VPS13B  | vacuolar protein sorting 13 homolog B (yeast)                                     | CCDS6280.1      | chr8_100871685-100871685_C_T  | 3699S>L | Substitution | Nonsynonymous coding | 15% |
| MM18T | VPS13B  | vacuolar protein sorting 13 homolog B (yeast)                                     | CCDS6280.1      | chr8_100520086-100520086_C_T  | 1416R>X | Substitution | Nonsense             | 13% |
| MM18T | VPS13C  | vacuolar protein sorting 13 homolog C (S. cerevisiae)                             | CCDS32257.1     | chr15_62172874-62172874_C_T   | 3312M>I | Substitution | Nonsynonymous coding | 14% |
| MM18T | VPS13C  | vacuolar protein sorting 13 homolog C (S. cerevisiae)                             | CCDS32257.1     | chr15_62207853-62207853_C_A   | 2808K>N | Substitution | Nonsynonymous coding | 23% |
| MM18T | VPS13C  | vacuolar protein sorting 13 homolog C (S. cerevisiae)                             | CCDS32257.1     | chr15_62256049-62256049_C_T   | 1106E>K | Substitution | Nonsynonymous coding | 11% |
| MM18T | VPS13C  | vacuolar protein sorting 13 homolog C (S. cerevisiae)                             | CCDS32257.1     | chr15_62256067-62256067_C_T   | 1100E>K | Substitution | Nonsynonymous coding | 12% |
| MM18T | VPS13C  | vacuolar protein sorting 13 homolog C (S. cerevisiae)                             | CCDS32257.1     | chr15_62302726-62302726_T_C   | 319K>R  | Substitution | Nonsynonymous coding | 15% |

|       |         |                                                          |             |                               |         |              |                      |     |
|-------|---------|----------------------------------------------------------|-------------|-------------------------------|---------|--------------|----------------------|-----|
| MM18T | VPS13C  | vacuolar protein sorting 13 homolog C (S. cerevisiae)    | CCDS32257.1 | chr15_62274682-62274682_C_A   | 669E>X  | Substitution | Nonsense             | 11% |
| MM18T | VPS13D  | vacuolar protein sorting 13 homolog D (S. cerevisiae)    | CCDS30588.1 | chr1_12335954-12335954_C_     | NA      | Deletion     | Frameshift           | 12% |
| MM18T | VPS13D  | vacuolar protein sorting 13 homolog D (S. cerevisiae)    | CCDS30588.1 | chr1_12383813-12383813_C_T    | 2656R>C | Substitution | Nonsynonymous coding | 17% |
| MM18T | VPS29   | vacuolar protein sorting 29 homolog (S. cerevisiae)      | CCDS41832.1 | chr12_110929827-110929827_C_T | 178E>K  | Substitution | Nonsynonymous coding | 17% |
| MM18T | VPS33B  | vacuolar protein sorting 33 homolog B (yeast)            | CCDS10369.1 | chr15_91550755-91550755_G_T   | 183L>I  | Substitution | Nonsynonymous coding | 11% |
| MM18T | VPS41   | vacuolar protein sorting 41 homolog (S. cerevisiae)      | CCDS5457.1  | chr7_38768382-38768382_G_A    | 757R>C  | Substitution | Nonsynonymous coding | 14% |
| MM18T | VPS4B   | vacuolar protein sorting 4 homolog B (S. cerevisiae)     | CCDS11983.1 | chr18_61078807-61078807_G_A   | 11A>V   | Substitution | Nonsynonymous coding | 18% |
| MM18T | VPS53   | vacuolar protein sorting 53 homolog (S. cerevisiae)      | CCDS45558.1 | chr17_489523-489523_C_T       | 434E>K  | Substitution | Nonsynonymous coding | 18% |
| MM18T | VPS8    | vacuolar protein sorting 8 homolog (S. cerevisiae)       | CCDS46971.1 | chr3_184542528-184542528_C_A  | 36F>L   | Substitution | Nonsynonymous coding | 16% |
| MM18T | VPS8    | vacuolar protein sorting 8 homolog (S. cerevisiae)       | CCDS46971.1 | chr3_184714159-184714159_C_A  | 1236L>I | Substitution | Nonsynonymous coding | 12% |
| MM18T | VSIG2   | V-set and immunoglobulin domain containing 2             | CCDS8452.1  | chr11_124619708-124619708_G_T | 161S>Y  | Substitution | Nonsynonymous coding | 16% |
| MM18T | VSIG4   | V-set and immunoglobulin domain containing 4             | CCDS14383.1 | chrX_65253474-65253474_C_T    | 85R>H   | Substitution | Nonsynonymous coding | 16% |
| MM18T | VSNL1   | visinin-like 1                                           | CCDS1689.1  | chr2_17830883-17830883_G_T    | 123E>D  | Substitution | Nonsynonymous coding | 12% |
| MM18T | VSTM1   | V-set and transmembrane domain containing 1              | CCDS12872.1 | chr19_54544289-54544289_C_T   | 213A>T  | Substitution | Nonsynonymous coding | 12% |
| MM18T | VSX2    | visual system homeobox 2                                 | CCDS9827.1  | chr14_74707963-74707963_G_A   | 150R>Q  | Substitution | Nonsynonymous coding | 16% |
| MM18T | VTI1B   | vesicle transport through interaction with t-SNAREs 1B   | CCDS9786.1  | chr14_68123302-68123302_C_T   | 124R>Q  | Substitution | Nonsynonymous coding | 13% |
| MM18T | VWA3B   | von Willebrand factor A domain containing 3B             | CCDS42718.1 | chr2_98810891-98810891_A_G    | 558E>G  | Substitution | Nonsynonymous coding | 12% |
| MM18T | VWA5B2  | von Willebrand factor A domain containing 5B2            | NM_138345   | chr3_183959591-183959591_G_A  | 1165R>Q | Substitution | Nonsynonymous coding | 12% |
| MM18T | VWA7    | von Willebrand factor A domain containing 7              | CCDS4721.2  | chr6_31736848-31736848_C_A    | 484D>Y  | Substitution | Nonsynonymous coding | 15% |
| MM18T | VWC2    | von Willebrand factor C domain containing 2              | CCDS5508.1  | chr7_49815476-49815476_G_A    | 149D>N  | Substitution | Nonsynonymous coding | 16% |
| MM18T | VWC2L   | von Willebrand factor C domain containing protein 2-like | CCDS46509.1 | chr2_215279020-215279020_G_A  | 35D>N   | Substitution | Nonsynonymous coding | 11% |
| MM18T | VWCE    | von Willebrand factor C and EGF domains                  | CCDS8002.1  | chr11_61026698-61026698_C_A   | 773D>Y  | Substitution | Nonsynonymous coding | 19% |
| MM18T | WAPAL   | wings apart-like homolog (Drosophila)                    | CCDS7375.1  | chr10_88197342-88197342_C_A   | 1177Q>H | Substitution | Nonsynonymous coding | 12% |
| MM18T | WAPAL   | wings apart-like homolog (Drosophila)                    | CCDS7375.1  | chr10_88260260-88260260_C_A   | 247R>I  | Substitution | Nonsynonymous coding | 13% |
| MM18T | WASF1   | WAS protein family, member 1                             | CCDS5080.1  | chr6_110429813-110429813_G_A  | 114R>C  | Substitution | Nonsynonymous coding | 11% |
| MM18T | WBP5    | WW domain binding protein 5                              | CCDS14507.1 | chrX_102612740-102612740_G_A  | 43G>E   | Substitution | Nonsynonymous coding | 11% |
| MM18T | WBP5    | WW domain binding protein 5                              | CCDS14507.1 | chrX_102612784-102612784_G_A  | 58E>K   | Substitution | Nonsynonymous coding | 14% |
| MM18T | WBSCR28 | Williams-Beuren syndrome chromosome region 28            | CCDS43597.1 | chr7_73279584-73279584_G_A    | 112A>T  | Substitution | Nonsynonymous coding | 13% |
| MM18T | WDFY3   | WD repeat and FYVE domain containing 3                   | CCDS3609.1  | chr4_85654599-85654599_C_T    | 2386R>Q | Substitution | Nonsynonymous coding | 13% |
| MM18T | WDFY3   | WD repeat and FYVE domain containing 3                   | CCDS3609.1  | chr4_85731466-85731466_C_T    | 640R>H  | Substitution | Nonsynonymous coding | 17% |
| MM18T | WDFY3   | WD repeat and FYVE domain containing 3                   | CCDS3609.1  | chr4_85614146-85614146_G_A    | 2981R>X | Substitution | Nonsense             | 13% |
| MM18T | WDR17   | WD repeat domain 17                                      | CCDS3825.1  | chr4_177067183-177067183_C_T  | 547R>C  | Substitution | Nonsynonymous coding | 11% |

|       |        |                                                                               |              |                              |         |              |                      |     |
|-------|--------|-------------------------------------------------------------------------------|--------------|------------------------------|---------|--------------|----------------------|-----|
| MM18T | WDR17  | WD repeat domain 17                                                           | CCDS3825.1   | chr4_177071194-177071194_A_G | 707D>G  | Substitution | Nonsynonymous coding | 14% |
| MM18T | WDR17  | WD repeat domain 17                                                           | CCDS3825.1   | chr4_177081182-177081182_G_A | 879V>I  | Substitution | Nonsynonymous coding | 13% |
| MM18T | WDR33  | WD repeat domain 33                                                           | CCDS2150.1   | chr2_128520679-128520679_T_G | 227R>S  | Substitution | Nonsynonymous coding | 11% |
| MM18T | WDR35  | WD repeat domain 35                                                           | CCDS33152.1  | chr2_20153613-20153613_C_T   | 472R>Q  | Substitution | Nonsynonymous coding | 11% |
| MM18T | WDR36  | WD repeat domain 36                                                           | CCDS4102.1   | chr5_110428209-110428209_G_A | 75A>T   | Substitution | Nonsynonymous coding | 14% |
| MM18T | WDR37  | WD repeat domain 37                                                           | CCDS7057.1   | chr10_1123910-1123910_G_T    | 68E>X   | Substitution | Nonsense             | 13% |
| MM18T | WDR44  | WD repeat domain 44                                                           | CCDS14572.1  | chrX_117527012-117527012_G_T | 202D>Y  | Substitution | Nonsynonymous coding | 12% |
| MM18T | WDR46  | WD repeat domain 46                                                           | CCDS4772.1   | chr6_33248714-33248714_C_T   | 389R>Q  | Substitution | Nonsynonymous coding | 14% |
| MM18T | WDR47  | WD repeat domain 47                                                           | CCDS44186.1  | chr1_109544985-109544985_G_T | 440Q>K  | Substitution | Nonsynonymous coding | 10% |
| MM18T | WDR47  | WD repeat domain 47                                                           | CCDS44186.1  | chr1_109553685-109553685_T_C | 335D>G  | Substitution | Nonsynonymous coding | 17% |
| MM18T | WDR49  | WD repeat domain 49                                                           | CCDS3201.1   | chr3_167245726-167245726_C_T | 477R>Q  | Substitution | Nonsynonymous coding | 18% |
| MM18T | WDR59  | WD repeat domain 59                                                           | CCDS32488.1  | chr16_74927580-74927580_T_C  | 666Y>C  | Substitution | Nonsynonymous coding | 13% |
| MM18T | WDR6   | WD repeat domain 6                                                            | CCDS2782.2   | chr3_49049131-49049131_G_A   | 85R>Q   | Substitution | Nonsynonymous coding | 11% |
| MM18T | WDR60  | WD repeat domain 60                                                           | CCDS47757.1  | chr7_158706963-158706963_C_A | 581P>Q  | Substitution | Nonsynonymous coding | 10% |
| MM18T | WDR60  | WD repeat domain 60                                                           | CCDS47757.1  | chr7_158726873-158726873_A_C | 867K>T  | Substitution | Nonsynonymous coding | 19% |
| MM18T | WDR63  | WD repeat domain 63                                                           | CCDS702.1    | chr1_85560170-85560170_T_C   | 369S>P  | Substitution | Nonsynonymous coding | 18% |
| MM18T | WDR67  | WD repeat domain 67                                                           | CCDS6338.1   | chr8_124153064-124153064_C_T | 855R>X  | Substitution | Nonsense             | 16% |
| MM18T | WDR7   | WD repeat domain 7                                                            | CCDS11962.1  | chr18_54603054-54603054_A_C  | 1250D>A | Substitution | Nonsynonymous coding | 21% |
| MM18T | WDR72  | WD repeat domain 72                                                           | CCDS10151.1  | chr15_53907717-53907717_G_A  | 896R>X  | Substitution | Nonsense             | 17% |
| MM18T | WDR76  | WD repeat domain 76                                                           | CCDS10106.1  | chr15_44150960-44150960_G_A  | 501A>T  | Substitution | Nonsynonymous coding | 11% |
| MM18T | WDR78  | WD repeat domain 78                                                           | CCDS635.1    | chr1_67301454-67301454_C_A   | 530E>X  | Substitution | Nonsense             | 19% |
| MM18T | WDR81  | WD repeat domain 81                                                           | NM_001163809 | chr17_1628363-1628363_A_G    | 37D>G   | Substitution | Nonsynonymous coding | 13% |
| MM18T | WDR81  | WD repeat domain 81                                                           | NM_001163809 | chr17_1629436-1629436_C_T    | 395R>C  | Substitution | Nonsynonymous coding | 11% |
| MM18T | WDR81  | WD repeat domain 81                                                           | NM_001163809 | chr17_1629889-1629889_G_A    | 546D>N  | Substitution | Nonsynonymous coding | 17% |
| MM18T | WDR87  | WD repeat domain 87                                                           | CCDS46063.1  | chr19_38379324-38379324_T_C  | 1624T>A | Substitution | Nonsynonymous coding | 16% |
| MM18T | WDR87  | WD repeat domain 87                                                           | CCDS46063.1  | chr19_38379328-38379328_T_G  | 1622K>N | Substitution | Nonsynonymous coding | 16% |
| MM18T | WDR87  | WD repeat domain 87                                                           | CCDS46063.1  | chr19_38383440-38383440_T_C  | 929D>G  | Substitution | Nonsynonymous coding | 12% |
| MM18T | WDR87  | WD repeat domain 87                                                           | CCDS46063.1  | chr19_38378721-38378721_C_A  | 1825E>X | Substitution | Nonsense             | 11% |
| MM18T | WDSUB1 | WD repeat, sterile alpha motif and U-box domain containing 1                  | CCDS2208.1   | chr2_160092704-160092704_A_  | NA      | Deletion     | Splice site acceptor | 11% |
| MM18T | WDYHV1 | WDYHV motif containing 1                                                      | CCDS6344.1   | chr8_124448753-124448753_G_A | 99D>N   | Substitution | Nonsynonymous coding | 10% |
| MM18T | WEE1   | WEE1 homolog (S. pombe)                                                       | CCDS7800.1   | chr11_9607046-9607046_G_A    | 481R>H  | Substitution | Nonsynonymous coding | 10% |
| MM18T | WFIKK2 | WAP, follistatin/kazal, immunoglobulin, kunitz and netrin domain containing 2 | CCDS11575.1  | chr17_48913428-48913428_G_A  | 44G>S   | Substitution | Nonsynonymous coding | 13% |

|       |        |                                                       |                 |                               |         |              |                      |     |
|-------|--------|-------------------------------------------------------|-----------------|-------------------------------|---------|--------------|----------------------|-----|
| MM18T | WFS1   | Wolfram syndrome 1 (wolframin)                        | CCDS3386.1      | chr4_6296860-6296860_G_A      | 269E>K  | Substitution | Nonsynonymous coding | 23% |
| MM18T | WIPF1  | WAS/WASL interacting protein family, member 1         | CCDS2260.1      | chr2_175436983-175436983_G_A  | 184P>S  | Substitution | Nonsynonymous coding | 10% |
| MM18T | WIPF3  | WAS/WASL interacting protein family, member 3         | NM_001080529    | chr7_29927809-29927809_C_T    | 409R>X  | Substitution | Nonsense             | 14% |
| MM18T | WIP1   | WD repeat domain, phosphoinositide interacting 1      | CCDS11677.1     | chr17_66431851-66431851_T_G   | 177K>N  | Substitution | Nonsynonymous coding | 16% |
| MM18T | WIZ    | widely interspaced zinc finger motifs                 | ENST00000389282 | chr19_15540715-15540715_G_A   | 928P>S  | Substitution | Nonsynonymous coding | 20% |
| MM18T | WNK1   | WNK lysine deficient protein kinase 1                 | CCDS8506.1      | chr12_968555-968555_A_C       | 515K>N  | Substitution | Nonsynonymous coding | 12% |
| MM18T | WNK2   | WNK lysine deficient protein kinase 2                 | NM_006648       | chr9_96000548-96000548_G_A    | 423D>N  | Substitution | Nonsynonymous coding | 11% |
| MM18T | WNK2   | WNK lysine deficient protein kinase 2                 | NM_006648       | chr9_96051438-96051438_G_A    | 1468A>T | Substitution | Nonsynonymous coding | 24% |
| MM18T | WNK3   | WNK lysine deficient protein kinase 3                 | CCDS14357.1     | chrX_54265318-54265318_C_A    | 1289R>I | Substitution | Nonsynonymous coding | 13% |
| MM18T | WNK4   | WNK lysine deficient protein kinase 4                 | CCDS11439.1     | chr17_40948044-40948044_C_T   | 1142R>W | Substitution | Nonsynonymous coding | 14% |
| MM18T | WNT11  | wingless-type MMTV integration site family, member 11 | CCDS8242.1      | chr11_75898201-75898201_C_T   | 325V>M  | Substitution | Nonsynonymous coding | 19% |
| MM18T | WNT3A  | wingless-type MMTV integration site family, member 3A | CCDS1564.1      | chr1_228238521-228238521_G_A  | 160E>K  | Substitution | Nonsynonymous coding | 21% |
| MM18T | WNT5A  | wingless-type MMTV integration site family, member 5A | CCDS46850.1     | chr3_55508373-55508373_C_T    | 226G>S  | Substitution | Nonsynonymous coding | 17% |
| MM18T | WNT5A  | wingless-type MMTV integration site family, member 5A | CCDS46850.1     | chr3_55508577-55508577_C_T    | 158E>K  | Substitution | Nonsynonymous coding | 18% |
| MM18T | WNT8A  | wingless-type MMTV integration site family, member 8A | CCDS43368.1     | chr5_137426237-137426237_A_C  | 177K>N  | Substitution | Nonsynonymous coding | 15% |
| MM18T | WNT8A  | wingless-type MMTV integration site family, member 8A | CCDS43368.1     | chr5_137426565-137426565_C_T  | 287R>X  | Substitution | Nonsense             | 14% |
| MM18T | WNT9B  | wingless-type MMTV integration site family, member 9B | CCDS11506.1     | chr17_44952611-44952611_G_A   | 160G>D  | Substitution | Nonsynonymous coding | 15% |
| MM18T | WRAP53 | WD repeat containing, antisense to TP53               | CCDS11119.1     | chr17_7592958-7592958_G_A     | 194R>Q  | Substitution | Nonsynonymous coding | 11% |
| MM18T | WRN    | Werner syndrome, RecQ helicase-like                   | CCDS6082.1      | chr8_30916774-30916774_G_T    | 68D>Y   | Substitution | Nonsynonymous coding | 13% |
| MM18T | WRN    | Werner syndrome, RecQ helicase-like                   | CCDS6082.1      | chr8_30958434-30958434_T_C    | 684F>S  | Substitution | Nonsynonymous coding | 11% |
| MM18T | WSCD2  | WSC domain containing 2                               | CCDS41828.1     | chr12_108603960-108603960_C_T | 187A>V  | Substitution | Nonsynonymous coding | 11% |
| MM18T | WT1    | Wilms tumor 1                                         | ENST00000379079 | chr11_32414220-32414220_C_T   | 232R>K  | Substitution | Nonsynonymous coding | 12% |
| MM18T | WWC2   | WW and C2 domain containing 2                         | CCDS34109.2     | chr4_184182071-184182071_C_T  | 432A>V  | Substitution | Nonsynonymous coding | 14% |
| MM18T | WWC3   | WWC family member 3                                   | CCDS14136.1     | chrX_10104734-10104734_C_A    | 942T>N  | Substitution | Nonsynonymous coding | 14% |
| MM18T | WWP2   | WW domain containing E3 ubiquitin protein ligase 2    | CCDS10885.1     | chr16_69951773-69951773_G_T   | 389R>I  | Substitution | Nonsynonymous coding | 22% |
| MM18T | XAB2   | XPA binding protein 2                                 | CCDS32892.1     | chr19_7687488-7687488_C_A     | 477Q>H  | Substitution | Nonsynonymous coding | 23% |
| MM18T | XDH    | xanthine dehydrogenase                                | CCDS1775.1      | chr2_31590924-31590924_C_A    | ISV-1>  | Substitution | Splice site acceptor | 10% |
| MM18T | XIRP1  | xin actin-binding repeat containing 1                 | CCDS2683.1      | chr3_39226687-39226687_C_T    | 1417G>D | Substitution | Nonsynonymous coding | 13% |
| MM18T | XIRP1  | xin actin-binding repeat containing 1                 | CCDS2683.1      | chr3_39230615-39230615_C_A    | 108E>X  | Substitution | Nonsense             | 13% |
| MM18T | XIRP2  | xin actin-binding repeat containing 2                 | CCDS42769.1     | chr2_168103737-168103737_A_   | NA      | Deletion     | Frameshift           | 13% |
| MM18T | XIRP2  | xin actin-binding repeat containing 2                 | CCDS42769.1     | chr2_167760210-167760210_C_T  | 73S>L   | Substitution | Nonsynonymous coding | 12% |
| MM18T | XIRP2  | xin actin-binding repeat containing 2                 | CCDS42769.1     | chr2_167992447-167992447_C_T  | 146S>L  | Substitution | Nonsynonymous coding | 13% |

|       |         |                                                                             |                 |                              |         |              |                      |     |
|-------|---------|-----------------------------------------------------------------------------|-----------------|------------------------------|---------|--------------|----------------------|-----|
| MM18T | XIRP2   | xin actin-binding repeat containing 2                                       | ENST00000409728 | chr2_168041072-168041072_G_A | 195A>T  | Substitution | Nonsynonymous coding | 12% |
| MM18T | XIRP2   | xin actin-binding repeat containing 2                                       | CCDS42769.1     | chr2_168099214-168099214_C_A | 438L>M  | Substitution | Nonsynonymous coding | 10% |
| MM18T | XIRP2   | xin actin-binding repeat containing 2                                       | CCDS42769.1     | chr2_168106121-168106121_T_C | 2740V>A | Substitution | Nonsynonymous coding | 15% |
| MM18T | XKR7    | XK, Kell blood group complex subunit-related family, member 7               | CCDS33459.1     | chr20_30584394-30584394_C_T  | 292R>W  | Substitution | Nonsynonymous coding | 14% |
| MM18T | XKR9    | XK, Kell blood group complex subunit-related family, member 9               | CCDS34905.1     | chr8_71619283-71619283_G_T   | 130D>Y  | Substitution | Nonsynonymous coding | 11% |
| MM18T | XPC     | xeroderma pigmentosum, complementation group C                              | CCDS46763.1     | chr3_14201329-14201329_A_G   | 301I>T  | Substitution | Nonsynonymous coding | 11% |
| MM18T | XPNPEP2 | X-prolyl aminopeptidase (aminopeptidase P) 2, membrane-bound                | CCDS14613.1     | chrX_128896705-128896705_C_T | 567R>C  | Substitution | Nonsynonymous coding | 10% |
| MM18T | XPO1    | exportin 1 (CRM1 homolog, yeast)                                            | CCDS33205.1     | chr2_61724120-61724120_C_T   | 261R>Q  | Substitution | Nonsynonymous coding | 12% |
| MM18T | XPO4    | exportin 4                                                                  | CCDS41872.1     | chr13_21417175-21417175_G_A  | 196R>C  | Substitution | Nonsynonymous coding | 11% |
| MM18T | XPO4    | exportin 4                                                                  | CCDS41872.1     | chr13_21370399-21370399_A    | NA      | Insertion    | Splice site acceptor | 18% |
| MM18T | XPO6    | exportin 6                                                                  | CCDS42135.1     | chr16_28117402-28117402_C_T  | 916A>T  | Substitution | Nonsynonymous coding | 13% |
| MM18T | XPR1    | xenotropic and polytropic retrovirus receptor 1                             | CCDS1340.1      | chr1_180772738-180772738_G_T | 146Q>H  | Substitution | Nonsynonymous coding | 13% |
| MM18T | XRCC1   | X-ray repair complementing defective repair in Chinese hamster cells 1      | CCDS12624.1     | chr19_44050003-44050003_C_T  | 530E>K  | Substitution | Nonsynonymous coding | 24% |
| MM18T | XYLB    | xylokinase homolog (H. influenzae)                                          | CCDS2678.1      | chr3_38417643-38417643_G_A   | 347R>H  | Substitution | Nonsynonymous coding | 11% |
| MM18T | XYLB    | xylokinase homolog (H. influenzae)                                          | CCDS2678.1      | chr3_38420828-38420828_G_A   | 429R>Q  | Substitution | Nonsynonymous coding | 11% |
| MM18T | XYLT2   | xylosyltransferase II                                                       | CCDS11563.1     | chr17_48437348-48437348_A_G  | 765H>R  | Substitution | Nonsynonymous coding | 11% |
| MM18T | YEATS2  | YEATS domain containing 2                                                   | CCDS43175.1     | chr3_183435536-183435536_G_T | 66Q>H   | Substitution | Nonsynonymous coding | 11% |
| MM18T | YEATS2  | YEATS domain containing 2                                                   | CCDS43175.1     | chr3_183516679-183516679_T_C | 1076V>A | Substitution | Nonsynonymous coding | 12% |
| MM18T | YEATS2  | YEATS domain containing 2                                                   | CCDS43175.1     | chr3_183524734-183524734_G_A | 1289E>K | Substitution | Nonsynonymous coding | 20% |
| MM18T | YIPF1   | Yip1 domain family, member 1                                                | CCDS584.1       | chr1_54332025-54332025_G_A   | 227R>C  | Substitution | Nonsynonymous coding | 20% |
| MM18T | YLPM1   | YLP motif containing 1                                                      | CCDS45135.1     | chr14_75230626-75230626_C    | NA      | Insertion    | Frameshift           | 11% |
| MM18T | YLPM1   | YLP motif containing 1                                                      | CCDS45135.1     | chr14_75245310-75245310_C_A  | 345S>Y  | Substitution | Nonsynonymous coding | 11% |
| MM18T | YLPM1   | YLP motif containing 1                                                      | CCDS45135.1     | chr14_75248725-75248725_C_T  | 660S>L  | Substitution | Nonsynonymous coding | 12% |
| MM18T | YOD1    | YOD1 OTU deubiquinating enzyme 1 homolog (S. cerevisiae)                    | CCDS31002.1     | chr1_207222595-207222595_G_A | 273R>C  | Substitution | Nonsynonymous coding | 13% |
| MM18T | YTHDC1  | YTH domain containing 1                                                     | CCDS33992.1     | chr4_69203403-69203403_G_A   | 116R>C  | Substitution | Nonsynonymous coding | 16% |
| MM18T | YTHDC2  | YTH domain containing 2                                                     | CCDS4113.1      | chr5_112891786-112891786_A_C | 724K>T  | Substitution | Nonsynonymous coding | 16% |
| MM18T | YTHDF1  | YTH domain family, member 1                                                 | CCDS13511.1     | chr20_61833800-61833800_C_T  | 498D>N  | Substitution | Nonsynonymous coding | 14% |
| MM18T | YTHDF1  | YTH domain family, member 1                                                 | CCDS13511.1     | chr20_61834253-61834253_C_T  | 347D>N  | Substitution | Nonsynonymous coding | 12% |
| MM18T | YWHAH   | tyrosine 3-monooxygenase/tryptophan 5-monooxygenase activation protein, eta | CCDS13901.1     | chr22_32340732-32340732_G_T  | 5E>X    | Substitution | Nonsense             | 19% |
| MM18T | YY2     | YY2 transcription factor                                                    | CCDS14202.1     | chrX_21875501-21875501_G_A   | 300R>Q  | Substitution | Nonsynonymous coding | 12% |
| MM18T | ZACN    | zinc activated ligand-gated ion channel                                     | CCDS11740.2     | chr17_74075640-74075640_A_C  | 73N>T   | Substitution | Nonsynonymous coding | 14% |
| MM18T | ZBBX    | zinc finger, B-box domain containing                                        | CCDS3199.2      | chr3_167045832-167045832_C_T | 254D>N  | Substitution | Nonsynonymous coding | 14% |

|       |          |                                          |                 |                               |         |              |                      |     |
|-------|----------|------------------------------------------|-----------------|-------------------------------|---------|--------------|----------------------|-----|
| MM18T | ZBED2    | zinc finger, BED-type containing 2       | CCDS2960.2      | chr3_111312513-111312513_C_T  | 179R>Q  | Substitution | Nonsynonymous coding | 14% |
| MM18T | ZBED4    | zinc finger, BED-type containing 4       | CCDS33677.1     | chr22_50279171-50279171_C_T   | 621R>W  | Substitution | Nonsynonymous coding | 13% |
| MM18T | ZBTB10   | zinc finger and BTB domain containing 10 | CCDS47880.1     | chr8_81399325-81399325_T_G    | 94L>V   | Substitution | Nonsynonymous coding | 11% |
| MM18T | ZBTB2    | zinc finger and BTB domain containing 2  | CCDS5231.1      | chr6_151687801-151687801_C_A  | 134G>C  | Substitution | Nonsynonymous coding | 15% |
| MM18T | ZBTB21   | zinc finger and BTB domain containing 21 | CCDS13678.1     | chr21_43411332-43411332_G_A   | 958S>L  | Substitution | Nonsynonymous coding | 13% |
| MM18T | ZBTB21   | zinc finger and BTB domain containing 21 | CCDS13678.1     | chr21_43411395-43411395_A_C   | 937F>C  | Substitution | Nonsynonymous coding | 13% |
| MM18T | ZBTB22   | zinc finger and BTB domain containing 22 | CCDS4775.1      | chr6_33284384-33284384_C_T    | 104A>T  | Substitution | Nonsynonymous coding | 13% |
| MM18T | ZBTB25   | zinc finger and BTB domain containing 25 | CCDS9765.1      | chr14_64953972-64953972_G_T   | 326S>Y  | Substitution | Nonsynonymous coding | 18% |
| MM18T | ZBTB33   | zinc finger and BTB domain containing 33 | CCDS14596.1     | chrX_119388442-119388442_T_G  | 391I>S  | Substitution | Nonsynonymous coding | 10% |
| MM18T | ZBTB38   | zinc finger and BTB domain containing 38 | CCDS43157.1     | chr3_141162629-141162629_C_T  | 467R>C  | Substitution | Nonsynonymous coding | 14% |
| MM18T | ZBTB40   | zinc finger and BTB domain containing 40 | CCDS224.1       | chr1_22850928-22850928_G_T    | 1172Q>H | Substitution | Nonsynonymous coding | 17% |
| MM18T | ZBTB5    | zinc finger and BTB domain containing 5  | CCDS6610.1      | chr9_37441971-37441971_C_T    | 193R>H  | Substitution | Nonsynonymous coding | 11% |
| MM18T | ZBTB7A   | zinc finger and BTB domain containing 7A | CCDS12119.1     | chr19_4054816-4054816_C_T     | 139D>N  | Substitution | Nonsynonymous coding | 11% |
| MM18T | ZBTB7C   | zinc finger and BTB domain containing 7C | CCDS32830.1     | chr18_45566624-45566624_C_A   | 285K>N  | Substitution | Nonsynonymous coding | 18% |
| MM18T | ZC3H12C  | zinc finger CCCH-type containing 12C     | CCDS44727.1     | chr11_110023730-110023730_T_G | 287V>G  | Substitution | Nonsynonymous coding | 15% |
| MM18T | ZC3H13   | zinc finger CCCH-type containing 13      | CCDS9400.1      | chr13_46544043-46544043_G_A   | 879S>L  | Substitution | Nonsynonymous coding | 16% |
| MM18T | ZC3H13   | zinc finger CCCH-type containing 13      | CCDS9400.1      | chr13_46559497-46559497_C_T   | 552R>Q  | Substitution | Nonsynonymous coding | 10% |
| MM18T | ZC3H13   | zinc finger CCCH-type containing 13      | CCDS9400.1      | chr13_46563166-46563166_T_G   | 337Q>H  | Substitution | Nonsynonymous coding | 14% |
| MM18T | ZC3H3    | zinc finger CCCH-type containing 3       | CCDS6402.1      | chr8_144590021-144590021_T_G  | 537K>T  | Substitution | Nonsynonymous coding | 16% |
| MM18T | ZC3HAV1L | zinc finger CCCH-type, antiviral 1-like  | CCDS5850.1      | chr7_138713621-138713621_G_A  | 196S>F  | Substitution | Nonsynonymous coding | 16% |
| MM18T | ZC3HC1   | zinc finger, C3HC-type containing 1      | ENST00000311873 | chr7_129690298-129690298_G_A  | 23S>F   | Substitution | Nonsynonymous coding | 14% |
| MM18T | ZCCHC11  | zinc finger, CCHC domain containing 11   | CCDS30715.1     | chr1_52891078-52891078_T_G    | 1605N>H | Substitution | Nonsynonymous coding | 15% |
| MM18T | ZCCHC12  | zinc finger, CCHC domain containing 12   | CCDS14574.1     | chrX_117959382-117959382_G_T  | 59E>X   | Substitution | Nonsense             | 12% |
| MM18T | ZCCHC3   | zinc finger, CCHC domain containing 3    | NM_033089       | chr20_278342-278342_G_T       | 39G>C   | Substitution | Nonsynonymous coding | 25% |
| MM18T | ZCCHC6   | zinc finger, CCHC domain containing 6    | CCDS35057.1     | chr9_88916257-88916257_G_A    | 1452R>C | Substitution | Nonsynonymous coding | 21% |
| MM18T | ZCCHC6   | zinc finger, CCHC domain containing 6    | CCDS35057.1     | chr9_88943252-88943252_G_T    | ISV+3>  | Substitution | Splice site donor    | 17% |
| MM18T | ZCWPW1   | zinc finger, CW type with PWWP domain 1  | CCDS43623.1     | chr7_100014773-100014773_G_T  | 132S>Y  | Substitution | Nonsynonymous coding | 13% |
| MM18T | ZDBF2    | zinc finger, DBF-type containing 2       | CCDS46501.1     | chr2_207175200-207175200_A_C  | 1983K>T | Substitution | Nonsynonymous coding | 15% |
| MM18T | ZDHC1    | zinc finger, DHHC-type containing 1      | CCDS10836.1     | chr16_67429044-67429044_C_A   | 364R>I  | Substitution | Nonsynonymous coding | 23% |
| MM18T | ZDHC11   | zinc finger, DHHC-type containing 11     | CCDS3857.1      | chr5_850509-850509_T_C        | 70Y>C   | Substitution | Nonsynonymous coding | 20% |
| MM18T | ZDHC12   | zinc finger, DHHC-type containing 12     | CCDS6909.1      | chr9_131484313-131484313_C_T  | 97R>Q   | Substitution | Nonsynonymous coding | 21% |
| MM18T | ZDHC13   | zinc finger, DHHC-type containing 13     | CCDS44550.1     | chr11_19173745-19173745_C_T   | 209L>F  | Substitution | Nonsynonymous coding | 11% |



|       |         |                                           |                 |                              |         |              |                      |     |
|-------|---------|-------------------------------------------|-----------------|------------------------------|---------|--------------|----------------------|-----|
| MM18T | ZDHC15  | zinc finger, DHHC-type containing 15      | CCDS14430.1     | chrX_74742768-74742768_A_G   | 31V>A   | Substitution | Nonsynonymous coding | 15% |
| MM18T | ZDHC17  | zinc finger, DHHC-type containing 17      | CCDS44946.1     | chr12_77222233-77222233_C_A  | 368F>L  | Substitution | Nonsynonymous coding | 10% |
| MM18T | ZDHC8   | zinc finger, DHHC-type containing 8       | CCDS13776.1     | chr22_20126757-20126757_G_A  | 49V>I   | Substitution | Nonsynonymous coding | 16% |
| MM18T | ZEB2    | zinc finger E-box binding homeobox 2      | CCDS2186.1      | chr2_145156367-145156367_G_A | 796S>F  | Substitution | Nonsynonymous coding | 12% |
| MM18T | ZER1    | zyg-11 related, cell cycle regulator      | CCDS6910.1      | chr9_131515028-131515028_A_G | 283S>P  | Substitution | Nonsynonymous coding | 11% |
| MM18T | ZFAND3  | zinc finger, AN1-type domain 3            | CCDS4836.1      | chr6_38120143-38120143_G_A   | 221R>H  | Substitution | Nonsynonymous coding | 14% |
| MM18T | ZFAND3  | zinc finger, AN1-type domain 3            | CCDS4836.1      | chr6_38084428-38084428_C_T   | 148R>X  | Substitution | Nonsense             | 12% |
| MM18T | ZFAND4  | zinc finger, AN1-type domain 4            | CCDS7214.1      | chr10_46135332-46135332_T_G  | 217N>H  | Substitution | Nonsynonymous coding | 10% |
| MM18T | ZFAT    | zinc finger and AT hook domain containing | CCDS47924.1     | chr8_135614806-135614806_C_A | 386E>X  | Substitution | Nonsense             | 16% |
| MM18T | ZFH2    | zinc finger homeobox 2                    | ENST00000419474 | chr14_23991991-23991991_G_T  | 2300P>H | Substitution | Nonsynonymous coding | 11% |
| MM18T | ZFH2    | zinc finger homeobox 2                    | ENST00000419474 | chr14_23992802-23992802_G_A  | 2117R>C | Substitution | Nonsynonymous coding | 14% |
| MM18T | ZFH2    | zinc finger homeobox 2                    | ENST00000419474 | chr14_23993842-23993842_G_A  | 1770T>I | Substitution | Nonsynonymous coding | 12% |
| MM18T | ZFH3    | zinc finger homeobox 3                    | CCDS10908.1     | chr16_72821572-72821572_C_T  | 3535E>K | Substitution | Nonsynonymous coding | 19% |
| MM18T | ZFH3    | zinc finger homeobox 3                    | CCDS10908.1     | chr16_72822376-72822376_C_T  | 3267A>T | Substitution | Nonsynonymous coding | 17% |
| MM18T | ZFP64   | ZFP64 zinc finger protein                 | CCDS13439.1     | chr20_50713936-50713936_C_T  | 318D>N  | Substitution | Nonsynonymous coding | 13% |
| MM18T | ZFP64   | ZFP64 zinc finger protein                 | CCDS13440.1     | chr20_50781299-50781299__A   | NA      | Insertion    | Splice site acceptor | 22% |
| MM18T | ZFP91   | ZFP91 zinc finger protein                 | CCDS31554.1     | chr11_58390265-58390265_C_T  | 14R>W   | Substitution | Nonsynonymous coding | 10% |
| MM18T | ZFPM2   | zinc finger protein, FOG family member 2  | CCDS47908.1     | chr8_106814522-106814522_C_T | 738R>C  | Substitution | Nonsynonymous coding | 14% |
| MM18T | ZFX     | zinc finger protein, X-linked             | CCDS14211.1     | chrX_24225851-24225851_G_T   | 273E>D  | Substitution | Nonsynonymous coding | 16% |
| MM18T | ZFX     | zinc finger protein, X-linked             | CCDS14211.1     | chrX_24228930-24228930_G_T   | 619E>X  | Substitution | Nonsense             | 11% |
| MM18T | ZFYVE20 | zinc finger, FYVE domain containing 20    | CCDS2623.1      | chr3_15126509-15126509_C_T   | 145R>Q  | Substitution | Nonsynonymous coding | 14% |
| MM18T | ZFYVE20 | zinc finger, FYVE domain containing 20    | CCDS2623.1      | chr3_15131986-15131986_C_T   | 70R>Q   | Substitution | Nonsynonymous coding | 14% |
| MM18T | ZFYVE26 | zinc finger, FYVE domain containing 26    | CCDS9788.1      | chr14_68249652-68249652_G_T  | 1406S>Y | Substitution | Nonsynonymous coding | 11% |
| MM18T | ZFYVE28 | zinc finger, FYVE domain containing 28    | CCDS33942.1     | chr4_2274921-2274921_C_T     | 768D>N  | Substitution | Nonsynonymous coding | 14% |
| MM18T | ZG16    | zymogen granule protein 16                | NM_152338       | chr16_29790643-29790643_G_T  | ISV+1>  | Substitution | Splice site donor    | 16% |
| MM18T | ZHX2    | zinc fingers and homeoboxes 2             | CCDS6336.1      | chr8_123965500-123965500_C_T | 584R>X  | Substitution | Nonsense             | 12% |
| MM18T | ZIC3    | Zic family member 3                       | CCDS14663.1     | chrX_136649490-136649490_G_A | 214A>T  | Substitution | Nonsynonymous coding | 20% |
| MM18T | ZMAT1   | zinc finger, matrin-type 1                | CCDS35348.1     | chrX_101139222-101139222_G_T | 393Q>K  | Substitution | Nonsynonymous coding | 12% |
| MM18T | ZMAT3   | zinc finger, matrin-type 3                | CCDS3224.1      | chr3_178745240-178745240_C_A | 210R>I  | Substitution | Nonsynonymous coding | 11% |
| MM18T | ZMYND10 | zinc finger, MYND-type containing 10      | ENST00000360165 | chr3_50380031-50380031_G_T   | 219L>M  | Substitution | Nonsynonymous coding | 11% |
| MM18T | ZMYND12 | zinc finger, MYND-type containing 12      | CCDS467.1       | chr1_42914216-42914216_G_A   | 116R>C  | Substitution | Nonsynonymous coding | 14% |
| MM18T | ZMYND8  | zinc finger, MYND-type containing 8       | CCDS13405.1     | chr20_45910876-45910876_A_G  | 323V>A  | Substitution | Nonsynonymous coding | 16% |

|       |        |                         |                 |                               |         |              |                      |     |
|-------|--------|-------------------------|-----------------|-------------------------------|---------|--------------|----------------------|-----|
| MM18T | ZNF106 | zinc finger protein 106 | CCDS32208.1     | chr15_42710053-42710053_G_A   | 1849R>C | Substitution | Nonsynonymous coding | 10% |
| MM18T | ZNF106 | zinc finger protein 106 | CCDS32208.1     | chr15_42740854-42740854_C_A   | 828D>Y  | Substitution | Nonsynonymous coding | 17% |
| MM18T | ZNF106 | zinc finger protein 106 | CCDS32208.1     | chr15_42734270-42734270_C_T   | ISV+1>  | Substitution | Splice site donor    | 15% |
| MM18T | ZNF131 | zinc finger protein 131 | CCDS43313.1     | chr5_43174762-43174762_A_G    | 433T>A  | Substitution | Nonsynonymous coding | 13% |
| MM18T | ZNF132 | zinc finger protein 132 | CCDS12980.1     | chr19_58944880-58944880_C_T   | 644R>H  | Substitution | Nonsynonymous coding | 11% |
| MM18T | ZNF146 | zinc finger protein 146 | CCDS12492.1     | chr19_36727484-36727484_G_A   | 48E>K   | Substitution | Nonsynonymous coding | 11% |
| MM18T | ZNF157 | zinc finger protein 157 | CCDS14278.1     | chrX_47230096-47230096_G_T    | 10R>I   | Substitution | Nonsynonymous coding | 14% |
| MM18T | ZNF157 | zinc finger protein 157 | CCDS14278.1     | chrX_47269776-47269776_G_T    | 58E>D   | Substitution | Nonsynonymous coding | 17% |
| MM18T | ZNF165 | zinc finger protein 165 | CCDS4643.1      | chr6_28056881-28056881_G_T    | 364R>I  | Substitution | Nonsynonymous coding | 11% |
| MM18T | ZNF174 | zinc finger protein 174 | CCDS10504.1     | chr16_3452330-3452330_G_A     | 109R>Q  | Substitution | Nonsynonymous coding | 13% |
| MM18T | ZNF18  | zinc finger protein 18  | CCDS32568.1     | chr17_11886659-11886659_T_C   | 273I>V  | Substitution | Nonsynonymous coding | 14% |
| MM18T | ZNF18  | zinc finger protein 18  | CCDS32568.1     | chr17_11887482-11887482_C_A   | 233K>N  | Substitution | Nonsynonymous coding | 16% |
| MM18T | ZNF18  | zinc finger protein 18  | CCDS32568.1     | chr17_11895927-11895927_C_T   | 74V>I   | Substitution | Nonsynonymous coding | 11% |
| MM18T | ZNF182 | zinc finger protein 182 | CCDS35236.1     | chrX_47835799-47835799_T_C    | 563T>A  | Substitution | Nonsynonymous coding | 13% |
| MM18T | ZNF189 | zinc finger protein 189 | CCDS6754.1      | chr9_104171183-104171183_G_A  | 378G>E  | Substitution | Nonsynonymous coding | 15% |
| MM18T | ZNF19  | zinc finger protein 19  | CCDS10901.1     | chr16_71509404-71509404_C_A   | 349R>I  | Substitution | Nonsynonymous coding | 10% |
| MM18T | ZNF19  | zinc finger protein 19  | CCDS10901.1     | chr16_71512807-71512807_C_A   | 45E>D   | Substitution | Nonsynonymous coding | 16% |
| MM18T | ZNF195 | zinc finger protein 195 | CCDS44522.1     | chr11_3381116-3381116_C_A     | 374M>I  | Substitution | Nonsynonymous coding | 11% |
| MM18T | ZNF2   | zinc finger protein 2   | NM_021088       | chr2_95847481-95847481_G_A    | 303R>H  | Substitution | Nonsynonymous coding | 11% |
| MM18T | ZNF202 | zinc finger protein 202 | CCDS8443.1      | chr11_123597272-123597272_C_A | 460K>N  | Substitution | Nonsynonymous coding | 15% |
| MM18T | ZNF211 | zinc finger protein 211 | ENST00000391703 | chr19_58145268-58145268_G_A   | 28A>T   | Substitution | Nonsynonymous coding | 15% |
| MM18T | ZNF212 | zinc finger protein 212 | CCDS5896.1      | chr7_148950984-148950984_G_T  | 322E>D  | Substitution | Nonsynonymous coding | 10% |
| MM18T | ZNF219 | zinc finger protein 219 | CCDS9568.1      | chr14_21559585-21559585_G_T   | 517L>M  | Substitution | Nonsynonymous coding | 15% |
| MM18T | ZNF226 | zinc finger protein 226 | CCDS46102.1     | chr19_44681186-44681186_G_T   | 591E>X  | Substitution | Nonsense             | 14% |
| MM18T | ZNF227 | zinc finger protein 227 | CCDS12636.1     | chr19_44739210-44739210_G_T   | 209K>N  | Substitution | Nonsynonymous coding | 13% |
| MM18T | ZNF229 | zinc finger protein 229 | CCDS42574.1     | chr19_44946762-44946762_C_A   | 26E>D   | Substitution | Nonsynonymous coding | 11% |
| MM18T | ZNF230 | zinc finger protein 230 | CCDS33044.1     | chr19_44515360-44515360_G_T   | 390R>I  | Substitution | Nonsynonymous coding | 12% |
| MM18T | ZNF234 | zinc finger protein 234 | CCDS46101.1     | chr19_44661008-44661008_G_T   | 280R>I  | Substitution | Nonsynonymous coding | 14% |
| MM18T | ZNF235 | zinc finger protein 235 | CCDS33048.1     | chr19_44791454-44791454_T_G   | 712I>L  | Substitution | Nonsynonymous coding | 14% |
| MM18T | ZNF235 | zinc finger protein 235 | CCDS33048.1     | chr19_44793149-44793149_C_A   | 147E>X  | Substitution | Nonsense             | 13% |
| MM18T | ZNF236 | zinc finger protein 236 | CCDS42447.1     | chr18_74563867-74563867_C_T   | 110A>V  | Substitution | Nonsynonymous coding | 14% |
| MM18T | ZNF239 | zinc finger protein 239 | CCDS41502.1     | chr10_44053074-44053074_A_G   | 152C>R  | Substitution | Nonsynonymous coding | 14% |

|       |         |                          |              |                               |         |              |                      |     |
|-------|---------|--------------------------|--------------|-------------------------------|---------|--------------|----------------------|-----|
| MM18T | ZNF251  | zinc finger protein 251  | CCDS47944.1  | chr8_145948287-145948287_A_G  | 253V>A  | Substitution | Nonsynonymous coding | 21% |
| MM18T | ZNF26   | zinc finger protein 26   | CCDS31939.1  | chr12_133587810-133587810_T_C | 449S>P  | Substitution | Nonsynonymous coding | 11% |
| MM18T | ZNF260  | zinc finger protein 260  | NM_001012756 | chr19_37006017-37006017_G_A   | 42L>F   | Substitution | Nonsynonymous coding | 10% |
| MM18T | ZNF263  | zinc finger protein 263  | CCDS10499.1  | chr16_3339496-3339496_G_A     | 330W>X  | Substitution | Nonsense             | 16% |
| MM18T | ZNF264  | zinc finger protein 264  | CCDS33127.1  | chr19_57724021-57724021_C_T   | 519S>L  | Substitution | Nonsynonymous coding | 16% |
| MM18T | ZNF280A | zinc finger protein 280A | CCDS13800.1  | chr22_22869426-22869426_C_A   | 177D>Y  | Substitution | Nonsynonymous coding | 11% |
| MM18T | ZNF280A | zinc finger protein 280A | CCDS13800.1  | chr22_22869455-22869455_C_T   | 167R>Q  | Substitution | Nonsynonymous coding | 15% |
| MM18T | ZNF284  | zinc finger protein 284  | CCDS46099.1  | chr19_44590092-44590092_A_C   | 154K>T  | Substitution | Nonsynonymous coding | 13% |
| MM18T | ZNF292  | zinc finger protein 292  | CCDS47457.1  | chr6_87953265-87953265_G_A    | 272A>T  | Substitution | Nonsynonymous coding | 11% |
| MM18T | ZNF292  | zinc finger protein 292  | CCDS47457.1  | chr6_87965799-87965799_T_C    | 818Y>H  | Substitution | Nonsynonymous coding | 13% |
| MM18T | ZNF30   | zinc finger protein 30   | CCDS46044.1  | chr19_35435353-35435353_C_T   | 496R>X  | Substitution | Nonsense             | 17% |
| MM18T | ZNF302  | zinc finger protein 302  | CCDS46042.1  | chr19_35175469-35175469_C_A   | 176S>Y  | Substitution | Nonsynonymous coding | 15% |
| MM18T | ZNF304  | zinc finger protein 304  | CCDS12950.1  | chr19_57865177-57865177_C_T   | 40R>C   | Substitution | Nonsynonymous coding | 14% |
| MM18T | ZNF317  | zinc finger protein 317  | CCDS12210.1  | chr19_9271666-9271666_G_A     | 449D>N  | Substitution | Nonsynonymous coding | 16% |
| MM18T | ZNF318  | zinc finger protein 318  | CCDS4895.2   | chr6_43325442-43325442_G_A    | 204R>X  | Substitution | Nonsense             | 11% |
| MM18T | ZNF319  | zinc finger protein 319  | CCDS32462.1  | chr16_58031092-58031092_G_A   | 360R>C  | Substitution | Nonsynonymous coding | 17% |
| MM18T | ZNF329  | zinc finger protein 329  | CCDS12972.1  | chr19_58639267-58639267_C_A   | 535G>V  | Substitution | Nonsynonymous coding | 14% |
| MM18T | ZNF329  | zinc finger protein 329  | CCDS12972.1  | chr19_58640609-58640609_T_C   | 88T>A   | Substitution | Nonsynonymous coding | 11% |
| MM18T | ZNF331  | zinc finger protein 331  | CCDS33102.1  | chr19_54080686-54080686_G_T   | 291R>I  | Substitution | Nonsynonymous coding | 13% |
| MM18T | ZNF343  | zinc finger protein 343  | CCDS13028.1  | chr20_2473453-2473453_C_A     | 66D>Y   | Substitution | Nonsynonymous coding | 11% |
| MM18T | ZNF350  | zinc finger protein 350  | CCDS12845.1  | chr19_52469240-52469240_C_A   | 156E>X  | Substitution | Nonsense             | 16% |
| MM18T | ZNF365  | zinc finger protein 365  | CCDS7264.1   | chr10_64416169-64416169_T_G   | 381I>M  | Substitution | Nonsynonymous coding | 12% |
| MM18T | ZNF382  | zinc finger protein 382  | CCDS33004.1  | chr19_37118166-37118166_G_T   | 456R>I  | Substitution | Nonsynonymous coding | 10% |
| MM18T | ZNF397  | zinc finger protein 397  | CCDS45852.1  | chr18_32825667-32825667_G_T   | 333R>I  | Substitution | Nonsynonymous coding | 14% |
| MM18T | ZNF397  | zinc finger protein 397  | CCDS45852.1  | chr18_32826234-32826234_C_T   | 522S>L  | Substitution | Nonsynonymous coding | 12% |
| MM18T | ZNF404  | zinc finger protein 404  | NM_001033719 | chr19_44377438-44377438_G_A   | 307R>C  | Substitution | Nonsynonymous coding | 15% |
| MM18T | ZNF404  | zinc finger protein 404  | NM_001033719 | chr19_44377599-44377599_C_T   | 253R>Q  | Substitution | Nonsynonymous coding | 14% |
| MM18T | ZNF407  | zinc finger protein 407  | CCDS45885.1  | chr18_72347213-72347213_G_A   | 1413R>Q | Substitution | Nonsynonymous coding | 13% |
| MM18T | ZNF407  | zinc finger protein 407  | CCDS45885.1  | chr18_72347219-72347219_G_A   | 1415R>H | Substitution | Nonsynonymous coding | 11% |
| MM18T | ZNF407  | zinc finger protein 407  | CCDS45885.1  | chr18_72776180-72776180_C_T   | 2168T>M | Substitution | Nonsynonymous coding | 16% |
| MM18T | ZNF414  | zinc finger protein 414  | CCDS12205.1  | chr19_8577281-8577281_G_A     | 174R>C  | Substitution | Nonsynonymous coding | 18% |
| MM18T | ZNF420  | zinc finger protein 420  | CCDS12498.1  | chr19_37619601-37619601_C_T   | 570R>C  | Substitution | Nonsynonymous coding | 13% |

|       |         |                          |                 |                              |         |              |                      |     |
|-------|---------|--------------------------|-----------------|------------------------------|---------|--------------|----------------------|-----|
| MM18T | ZNF420  | zinc finger protein 420  | CCDS12498.1     | chr19_37619629-37619629_G_A  | 579R>Q  | Substitution | Nonsynonymous coding | 14% |
| MM18T | ZNF420  | zinc finger protein 420  | CCDS12498.1     | chr19_37619839-37619839_G_T  | 649G>V  | Substitution | Nonsynonymous coding | 11% |
| MM18T | ZNF423  | zinc finger protein 423  | CCDS32445.1     | chr16_49764730-49764730_C_T  | 77E>K   | Substitution | Nonsynonymous coding | 13% |
| MM18T | ZNF425  | zinc finger protein 425  | CCDS34773.1     | chr7_148801168-148801168_C_T | 599E>K  | Substitution | Nonsynonymous coding | 12% |
| MM18T | ZNF425  | zinc finger protein 425  | CCDS34773.1     | chr7_148802017-148802017_C_T | 316E>K  | Substitution | Nonsynonymous coding | 19% |
| MM18T | ZNF426  | zinc finger protein 426  | CCDS12215.1     | chr19_9639888-9639888_T      | NA      | Insertion    | Frameshift           | 17% |
| MM18T | ZNF438  | zinc finger protein 438  | CCDS7168.1      | chr10_31137767-31137767_G_A  | 523R>X  | Substitution | Nonsense             | 21% |
| MM18T | ZNF446  | zinc finger protein 446  | CCDS12982.1     | chr19_58991963-58991963_C_T  | 408S>L  | Substitution | Nonsynonymous coding | 20% |
| MM18T | ZNF449  | zinc finger protein 449  | CCDS14649.1     | chrX_134494237-134494237_G_T | 265D>Y  | Substitution | Nonsynonymous coding | 14% |
| MM18T | ZNF451  | zinc finger protein 451  | CCDS43477.1     | chr6_57012350-57012350_T_G   | 489H>Q  | Substitution | Nonsynonymous coding | 13% |
| MM18T | ZNF454  | zinc finger protein 454  | CCDS4441.1      | chr5_178392342-178392342_G_A | 313A>T  | Substitution | Nonsynonymous coding | 17% |
| MM18T | ZNF462  | zinc finger protein 462  | CCDS35096.1     | chr9_109687209-109687209_C_T | 339S>L  | Substitution | Nonsynonymous coding | 10% |
| MM18T | ZNF462  | zinc finger protein 462  | CCDS35096.1     | chr9_109689905-109689905_G_A | 1238D>N | Substitution | Nonsynonymous coding | 19% |
| MM18T | ZNF462  | zinc finger protein 462  | CCDS35096.1     | chr9_109691520-109691520_C_T | 1776S>L | Substitution | Nonsynonymous coding | 20% |
| MM18T | ZNF462  | zinc finger protein 462  | CCDS35096.1     | chr9_109691732-109691732_C_T | 1847R>C | Substitution | Nonsynonymous coding | 17% |
| MM18T | ZNF462  | zinc finger protein 462  | CCDS35096.1     | chr9_109771897-109771897_C_T | 2421R>W | Substitution | Nonsynonymous coding | 14% |
| MM18T | ZNF468  | zinc finger protein 468  | CCDS33094.1     | chr19_53343989-53343989_C_A  | 520E>X  | Substitution | Nonsense             | 14% |
| MM18T | ZNF471  | zinc finger protein 471  | CCDS12945.1     | chr19_57037124-57037124_G_A  | 563R>K  | Substitution | Nonsynonymous coding | 12% |
| MM18T | ZNF473  | zinc finger protein 473  | CCDS33077.1     | chr19_50549300-50549300_G_A  | 534E>K  | Substitution | Nonsynonymous coding | 15% |
| MM18T | ZNF484  | zinc finger protein 484  | CCDS35066.1     | chr9_95610657-95610657_G_A   | 138R>C  | Substitution | Nonsynonymous coding | 15% |
| MM18T | ZNF485  | zinc finger protein 485  | CCDS7205.2      | chr10_44112561-44112561_G_A  | 357R>H  | Substitution | Nonsynonymous coding | 13% |
| MM18T | ZNF485  | zinc finger protein 485  | CCDS7205.2      | chr10_44112696-44112696_G_T  | 402R>I  | Substitution | Nonsynonymous coding | 15% |
| MM18T | ZNF490  | zinc finger protein 490  | CCDS12272.1     | chr19_12692316-12692316_C_A  | 191E>D  | Substitution | Nonsynonymous coding | 13% |
| MM18T | ZNF513  | zinc finger protein 513  | CCDS1751.1      | chr2_27601741-27601741_G_A   | 131P>L  | Substitution | Nonsynonymous coding | 14% |
| MM18T | ZNF514  | zinc finger protein 514  | CCDS2011.1      | chr2_95815196-95815196_T_G   | 345K>T  | Substitution | Nonsynonymous coding | 17% |
| MM18T | ZNF514  | zinc finger protein 514  | CCDS2011.1      | chr2_95815281-95815281_C_T   | 317E>K  | Substitution | Nonsynonymous coding | 15% |
| MM18T | ZNF514  | zinc finger protein 514  | ENST00000447814 | chr2_95830811-95830811_T_G   | 3K>Q    | Substitution | Nonsynonymous coding | 13% |
| MM18T | ZNF518A | zinc finger protein 518A | ENST00000371192 | chr10_97918310-97918310_C_T  | 744A>V  | Substitution | Nonsynonymous coding | 15% |
| MM18T | ZNF521  | zinc finger protein 521  | CCDS32806.1     | chr18_22805073-22805073_G_A  | 937R>X  | Substitution | Nonsense             | 14% |
| MM18T | ZNF528  | zinc finger protein 528  | CCDS33091.1     | chr19_52919046-52919046_G_A  | 314R>Q  | Substitution | Nonsynonymous coding | 11% |
| MM18T | ZNF530  | zinc finger protein 530  | CCDS12955.1     | chr19_58118416-58118416_G_A  | 508R>Q  | Substitution | Nonsynonymous coding | 10% |
| MM18T | ZNF534  | zinc finger protein 534  | CCDS46165.1     | chr19_52941581-52941581_A_T  | 303K>X  | Substitution | Nonsense             | 16% |

|       |         |                                                        |                 |                               |        |              |                      |     |
|-------|---------|--------------------------------------------------------|-----------------|-------------------------------|--------|--------------|----------------------|-----|
| MM18T | ZNF541  | zinc finger protein 541                                | CCDS46133.1     | chr19_48047669-48047669_T_C   | 706E>G | Substitution | Nonsynonymous coding | 17% |
| MM18T | ZNF541  | zinc finger protein 541                                | CCDS46133.1     | chr19_48059023-48059023_C_T   | 31D>N  | Substitution | Nonsynonymous coding | 12% |
| MM18T | ZNF544  | zinc finger protein 544                                | CCDS12973.1     | chr19_58773815-58773815_C_T   | 615R>X | Substitution | Nonsense             | 14% |
| MM18T | ZNF546  | zinc finger protein 546                                | CCDS12548.1     | chr19_40519655-40519655_G_T   | 160E>X | Substitution | Nonsense             | 11% |
| MM18T | ZNF548  | zinc finger protein 548                                | CCDS46209.1     | chr19_57910604-57910604_T_G   | 317F>V | Substitution | Nonsynonymous coding | 11% |
| MM18T | ZNF550  | zinc finger protein 550                                | ENST00000344222 | chr19_58071036-58071036_C_A   | 5K>N   | Substitution | Nonsynonymous coding | 18% |
| MM18T | ZNF551  | zinc finger protein 551                                | CCDS12959.1     | chr19_58198536-58198536_A_C   | 282K>T | Substitution | Nonsynonymous coding | 10% |
| MM18T | ZNF558  | zinc finger protein 558 [Source:HGNC Symbol;Acc:26422] | CCDS12208.1     | chr19_8932681-8932681_G_A     | 40R>W  | Substitution | Nonsynonymous coding | 11% |
| MM18T | ZNF559  | zinc finger protein 559                                | CCDS12211.1     | chr19_9452635-9452635_A_C     | 170N>H | Substitution | Nonsynonymous coding | 12% |
| MM18T | ZNF560  | zinc finger protein 560                                | CCDS12214.1     | chr19_9578794-9578794_T_G     | 277I>L | Substitution | Nonsynonymous coding | 18% |
| MM18T | ZNF566  | zinc finger protein 566                                | CCDS46061.1     | chr19_36940091-36940091_G_A   | 350R>C | Substitution | Nonsynonymous coding | 14% |
| MM18T | ZNF568  | zinc finger protein 568                                | ENST00000455427 | chr19_37487974-37487974_C_T   | 397R>C | Substitution | Nonsynonymous coding | 12% |
| MM18T | ZNF569  | zinc finger protein 569                                | CCDS12503.1     | chr19_37905209-37905209_C_A   | 117K>N | Substitution | Nonsynonymous coding | 15% |
| MM18T | ZNF572  | zinc finger protein 572                                | CCDS6354.1      | chr8_125989970-125989970_G_A  | 487R>Q | Substitution | Nonsynonymous coding | 11% |
| MM18T | ZNF572  | zinc finger protein 572                                | CCDS6354.1      | chr8_125990069-125990069_C_A  | 520S>Y | Substitution | Nonsynonymous coding | 14% |
| MM18T | ZNF574  | zinc finger protein 574                                | CCDS12596.1     | chr19_42583620-42583620_C_T   | 288R>C | Substitution | Nonsynonymous coding | 15% |
| MM18T | ZNF577  | zinc finger protein 577                                | CCDS12842.2     | chr19_52376086-52376086_G_A   | 386T>M | Substitution | Nonsynonymous coding | 11% |
| MM18T | ZNF579  | zinc finger protein 579                                | CCDS12927.1     | chr19_56089987-56089987_G_A   | 340S>L | Substitution | Nonsynonymous coding | 21% |
| MM18T | ZNF585A | zinc finger protein 585A                               | CCDS12499.1     | chr19_37644184-37644184_C_T   | 151R>K | Substitution | Nonsynonymous coding | 12% |
| MM18T | ZNF585A | zinc finger protein 585A                               | ENST00000356958 | chr19_37647227-37647227_C_T   | 35D>N  | Substitution | Nonsynonymous coding | 13% |
| MM18T | ZNF585A | zinc finger protein 585A                               | ENST00000356958 | chr19_37660751-37660751_C_A   | 21S>I  | Substitution | Nonsynonymous coding | 13% |
| MM18T | ZNF586  | zinc finger protein 586                                | CCDS42640.1     | chr19_58291024-58291024_A_C   | 357N>H | Substitution | Nonsynonymous coding | 13% |
| MM18T | ZNF592  | zinc finger protein 592                                | CCDS32317.1     | chr15_85341273-85341273_C_T   | 858S>F | Substitution | Nonsynonymous coding | 21% |
| MM18T | ZNF594  | zinc finger protein 594                                | CCDS42241.1     | chr17_5087488-5087488_C_T     | 22E>K  | Substitution | Nonsynonymous coding | 16% |
| MM18T | ZNF605  | zinc finger protein 605                                | NM_001164715    | chr12_133502789-133502789_C_T | 397E>K | Substitution | Nonsynonymous coding | 13% |
| MM18T | ZNF605  | zinc finger protein 605                                | NM_001164715    | chr12_133503586-133503586_T_G | 131K>T | Substitution | Nonsynonymous coding | 12% |
| MM18T | ZNF607  | zinc finger protein 607                                | CCDS33006.1     | chr19_38189657-38189657_G_A   | 459R>C | Substitution | Nonsynonymous coding | 17% |
| MM18T | ZNF608  | zinc finger protein 608                                | CCDS34219.1     | chr5_124080572-124080572_C_A  | 37L>F  | Substitution | Nonsynonymous coding | 15% |
| MM18T | ZNF610  | zinc finger protein 610                                | CCDS12851.1     | chr19_52852449-52852449_G_T   | 8Q>H   | Substitution | Nonsynonymous coding | 11% |
| MM18T | ZNF618  | zinc finger protein 618                                | ENST00000374126 | chr9_116791246-116791246_A_G  | 360T>A | Substitution | Nonsynonymous coding | 26% |
| MM18T | ZNF622  | zinc finger protein 622                                | CCDS3886.1      | chr5_16458672-16458672_C_A    | 372K>N | Substitution | Nonsynonymous coding | 12% |
| MM18T | ZNF623  | zinc finger protein 623                                | CCDS34957.1     | chr8_144732067-144732067_G_T  | 9D>Y   | Substitution | Nonsynonymous coding | 11% |

|       |        |                               |                 |                              |         |              |                      |     |
|-------|--------|-------------------------------|-----------------|------------------------------|---------|--------------|----------------------|-----|
| MM18T | ZNF624 | zinc finger protein 624       | CCDS11180.1     | chr17_16526641-16526641_C_T  | 520R>Q  | Substitution | Nonsynonymous coding | 16% |
| MM18T | ZNF638 | zinc finger protein 638       | CCDS1917.1      | chr2_71654453-71654453_G_T   | 1818K>N | Substitution | Nonsynonymous coding | 12% |
| MM18T | ZNF646 | zinc finger protein 646       | CCDS10702.1     | chr16_31089513-31089513_G_A  | 623G>E  | Substitution | Nonsynonymous coding | 11% |
| MM18T | ZNF648 | zinc finger protein 648       | CCDS30952.1     | chr1_182026094-182026094_C_T | 351R>H  | Substitution | Nonsynonymous coding | 11% |
| MM18T | ZNF660 | zinc finger protein 660       | CCDS2716.1      | chr3_44636125-44636125_C_T   | 147S>L  | Substitution | Nonsynonymous coding | 13% |
| MM18T | ZNF660 | zinc finger protein 660       | CCDS2716.1      | chr3_44636295-44636295_A_C   | 204K>Q  | Substitution | Nonsynonymous coding | 15% |
| MM18T | ZNF667 | zinc finger protein 667       | CCDS12944.1     | chr19_56953441-56953441_A_G  | 308I>T  | Substitution | Nonsynonymous coding | 13% |
| MM18T | ZNF671 | zinc finger protein 671       | CCDS12961.1     | chr19_58232320-58232320__A   | NA      | Insertion    | Frameshift           | 13% |
| MM18T | ZNF677 | zinc finger protein 677       | CCDS12861.1     | chr19_53741069-53741069_G_A  | 304S>L  | Substitution | Nonsynonymous coding | 20% |
| MM18T | ZNF679 | zinc finger protein 679       | CCDS47592.1     | chr7_63720602-63720602_C_A   | 15L>M   | Substitution | Nonsynonymous coding | 12% |
| MM18T | ZNF679 | zinc finger protein 679       | CCDS47592.1     | chr7_63726390-63726390_A_G   | 127T>A  | Substitution | Nonsynonymous coding | 15% |
| MM18T | ZNF687 | zinc finger protein 687       | CCDS992.1       | chr1_151259655-151259655_G_T | 296K>N  | Substitution | Nonsynonymous coding | 10% |
| MM18T | ZNF692 | zinc finger protein 692       | CCDS44348.1     | chr1_249144602-249144602_C_T | 461R>H  | Substitution | Nonsynonymous coding | 14% |
| MM18T | ZNF71  | zinc finger protein 71        | CCDS12947.1     | chr19_57132982-57132982_G_T  | 109K>N  | Substitution | Nonsynonymous coding | 13% |
| MM18T | ZNF71  | zinc finger protein 71        | CCDS12947.1     | chr19_57133790-57133790_G_A  | 379E>K  | Substitution | Nonsynonymous coding | 15% |
| MM18T | ZNF710 | zinc finger protein 710       | CCDS10358.1     | chr15_90611561-90611561_G_A  | 398E>K  | Substitution | Nonsynonymous coding | 19% |
| MM18T | ZNF711 | zinc finger protein 711       | CCDS35344.1     | chrX_84510491-84510491_G_T   | 102E>D  | Substitution | Nonsynonymous coding | 16% |
| MM18T | ZNF711 | zinc finger protein 711       | CCDS35344.1     | chrX_84520191-84520191_G_T   | 282Q>H  | Substitution | Nonsynonymous coding | 13% |
| MM18T | ZNF713 | zinc finger protein 713       | CCDS34639.1     | chr7_56007182-56007182_C_A   | 259S>Y  | Substitution | Nonsynonymous coding | 10% |
| MM18T | ZNF718 | zinc finger protein 718       | NM_001039127    | chr4_155830-155830_A_C       | 452K>T  | Substitution | Nonsynonymous coding | 11% |
| MM18T | ZNF721 | zinc finger protein 721       | CCDS46991.1     | chr4_436293-436293_C_T       | 655D>N  | Substitution | Nonsynonymous coding | 15% |
| MM18T | ZNF729 | zinc finger protein 729       | ENST00000357491 | chr19_22496671-22496671_G_T  | 151R>I  | Substitution | Nonsynonymous coding | 13% |
| MM18T | ZNF75A | zinc finger protein 75a       | CCDS10501.1     | chr16_3366911-3366911_G_A    | ISV-1>  | Substitution | Splice site acceptor | 15% |
| MM18T | ZNF76  | zinc finger protein 76        | CCDS4801.1      | chr6_35260391-35260391_G_A   | 331S>N  | Substitution | Nonsynonymous coding | 14% |
| MM18T | ZNF772 | zinc finger protein 772       | CCDS33133.1     | chr19_57985157-57985157_C_A  | 319E>X  | Substitution | Nonsense             | 18% |
| MM18T | ZNF773 | zinc finger protein 773       | CCDS33134.1     | chr19_58018193-58018193_G_T  | 244E>X  | Substitution | Nonsense             | 11% |
| MM18T | ZNF781 | zinc finger protein 781       | CCDS12507.1     | chr19_38160557-38160557_C_T  | 165E>K  | Substitution | Nonsynonymous coding | 12% |
| MM18T | ZNF782 | zinc finger protein 782       | NM_001001662    | chr9_99580675-99580675_C_T   | 544G>S  | Substitution | Nonsynonymous coding | 16% |
| MM18T | ZNF783 | zinc finger family member 783 | ENST00000378052 | chr7_148984693-148984693_G_T | 280Q>H  | Substitution | Nonsynonymous coding | 10% |
| MM18T | ZNF785 | zinc finger protein 785       | CCDS10685.1     | chr16_30594477-30594477_G_A  | 208R>C  | Substitution | Nonsynonymous coding | 10% |
| MM18T | ZNF789 | zinc finger protein 789       | CCDS34693.1     | chr7_99084915-99084915_G_T   | 361R>I  | Substitution | Nonsynonymous coding | 12% |
| MM18T | ZNF790 | zinc finger protein 790       | CCDS12496.1     | chr19_37309669-37309669_C_A  | 526R>I  | Substitution | Nonsynonymous coding | 12% |

|       |         |                                              |                 |                               |         |              |                      |     |
|-------|---------|----------------------------------------------|-----------------|-------------------------------|---------|--------------|----------------------|-----|
| MM18T | ZNF790  | zinc finger protein 790                      | CCDS12496.1     | chr19_37310746-37310746_T_C   | 167D>G  | Substitution | Nonsynonymous coding | 13% |
| MM18T | ZNF792  | zinc finger protein 792                      | CCDS12440.2     | chr19_35449656-35449656_C_T   | 368C>Y  | Substitution | Nonsynonymous coding | 10% |
| MM18T | ZNF792  | zinc finger protein 792                      | CCDS12440.2     | chr19_35450035-35450035_C_T   | 242E>K  | Substitution | Nonsynonymous coding | 12% |
| MM18T | ZNF804B | zinc finger protein 804B                     | CCDS5613.1      | chr7_88963650-88963650_C_T    | 452H>Y  | Substitution | Nonsynonymous coding | 10% |
| MM18T | ZNF804B | zinc finger protein 804B                     | CCDS5613.1      | chr7_88966042-88966042_C_T    | 1249S>L | Substitution | Nonsynonymous coding | 15% |
| MM18T | ZNF804B | zinc finger protein 804B                     | CCDS5613.1      | chr7_88965573-88965573_G_T    | 1093E>X | Substitution | Nonsense             | 10% |
| MM18T | ZNF805  | zinc finger protein 805                      | CCDS46207.1     | chr19_57766061-57766061_C_A   | 625S>Y  | Substitution | Nonsynonymous coding | 10% |
| MM18T | ZNF81   | zinc finger protein 81                       | CCDS43933.1     | chrX_47774944-47774944_A_G    | 300K>R  | Substitution | Nonsynonymous coding | 12% |
| MM18T | ZNF814  | zinc finger protein 814                      | CCDS46212.1     | chr19_58385430-58385430_T_G   | 443K>T  | Substitution | Nonsynonymous coding | 10% |
| MM18T | ZNF83   | zinc finger protein 83                       | CCDS12854.1     | chr19_53116976-53116976_C_A   | 281R>I  | Substitution | Nonsynonymous coding | 12% |
| MM18T | ZNF836  | zinc finger protein 836                      | CCDS46162.1     | chr19_52659467-52659467_C_A   | 490R>I  | Substitution | Nonsynonymous coding | 10% |
| MM18T | ZNF837  | zinc finger protein 837                      | CCDS46216.1     | chr19_58879129-58879129_C_T   | 524R>Q  | Substitution | Nonsynonymous coding | 18% |
| MM18T | ZNF837  | zinc finger protein 837                      | CCDS46216.1     | chr19_58879930-58879930_C_T   | 257R>Q  | Substitution | Nonsynonymous coding | 17% |
| MM18T | ZNF839  | zinc finger protein 839                      | CCDS45164.1     | chr14_102792797-102792797_G_A | 255R>Q  | Substitution | Nonsynonymous coding | 11% |
| MM18T | ZNF84   | zinc finger protein 84                       | CCDS31940.1     | chr12_133635435-133635435_C_T | 712R>X  | Substitution | Nonsense             | 12% |
| MM18T | ZNF862  | zinc finger protein 862                      | CCDS47741.1     | chr7_149558035-149558035_C_T  | 596R>C  | Substitution | Nonsynonymous coding | 14% |
| MM18T | ZNF862  | zinc finger protein 862                      | CCDS47741.1     | chr7_149559370-149559370_C_T  | 1041R>W | Substitution | Nonsynonymous coding | 13% |
| MM18T | ZNF880  | zinc finger protein 880                      | CCDS46164.1     | chr19_52887920-52887920_C_T   | 363R>X  | Substitution | Nonsense             | 12% |
| MM18T | ZNF883  | zinc finger protein 883                      | NM_001101338    | chr9_115760190-115760190_C_A  | 117R>I  | Substitution | Nonsynonymous coding | 11% |
| MM18T | ZNRF4   | zinc and ring finger 4                       | CCDS42475.1     | chr19_5456421-5456421_G_A     | 307D>N  | Substitution | Nonsynonymous coding | 23% |
| MM18T | ZRANB3  | zinc finger, RAN-binding domain containing 3 | CCDS46419.1     | chr2_135965173-135965173_C_T  | 947R>Q  | Substitution | Nonsynonymous coding | 17% |
| MM18T | ZSCAN1  | zinc finger and SCAN domain containing 1     | CCDS12969.1     | chr19_58551901-58551901_G_T   | 152E>X  | Substitution | Nonsense             | 13% |
| MM18T | ZSCAN10 | zinc finger and SCAN domain containing 10    | CCDS10493.1     | chr16_3139346-3139346_G_A     | 642R>C  | Substitution | Nonsynonymous coding | 22% |
| MM18T | ZSCAN10 | zinc finger and SCAN domain containing 10    | CCDS10493.1     | chr16_3139819-3139819_G_A     | 484A>V  | Substitution | Nonsynonymous coding | 22% |
| MM18T | ZSCAN12 | zinc finger and SCAN domain containing 12    | ENST00000361028 | chr6_28350380-28350380_C_A    | 567K>N  | Substitution | Nonsynonymous coding | 16% |
| MM18T | ZSCAN16 | zinc finger and SCAN domain containing 16    | CCDS4644.1      | chr6_28097529-28097529_A_G    | 283H>R  | Substitution | Nonsynonymous coding | 15% |
| MM18T | ZSCAN20 | zinc finger and SCAN domain containing 20    | CCDS41300.1     | chr1_33958952-33958952_G_A    | 537R>H  | Substitution | Nonsynonymous coding | 14% |
| MM18T | ZSCAN25 | zinc finger and SCAN domain containing 25    | CCDS5671.2      | chr7_99227017-99227017_G_A    | 337E>K  | Substitution | Nonsynonymous coding | 12% |
| MM18T | ZSCAN31 | zinc finger and SCAN domain containing 31    | CCDS4649.1      | chr6_28294052-28294052_C_T    | 371R>Q  | Substitution | Nonsynonymous coding | 10% |
| MM18T | ZSCAN32 | zinc finger and SCAN domain containing 32    | CCDS10503.1     | chr16_3433715-3433715_A_      | NA      | Deletion     | Splice site acceptor | 12% |
| MM18T | ZSWIM2  | zinc finger, SWIM-type containing 2          | CCDS33348.1     | chr2_187692877-187692877_A_C  | 579L>R  | Substitution | Nonsynonymous coding | 14% |
| MM18T | ZSWIM3  | zinc finger, SWIM-type containing 3          | CCDS13381.1     | chr20_44506610-44506610_G_T   | 471E>D  | Substitution | Nonsynonymous coding | 12% |

|       |          |                                                                      |             |                               |         |              |                      |      |
|-------|----------|----------------------------------------------------------------------|-------------|-------------------------------|---------|--------------|----------------------|------|
| MM18T | ZSWIM5   | zinc finger, SWIM-type containing 5                                  | CCDS41319.1 | chr1_45485813-45485813_G_A    | 874R>W  | Substitution | Nonsynonymous coding | 13%  |
| MM18T | ZSWIM5   | zinc finger, SWIM-type containing 5                                  | CCDS41319.1 | chr1_45500079-45500079_G_T    | 785S>Y  | Substitution | Nonsynonymous coding | 12%  |
| MM18T | ZSWIM6   | zinc finger, SWIM-type containing 6                                  | CCDS47215.1 | chr5_60825919-60825919_G_T    | 626E>D  | Substitution | Nonsynonymous coding | 14%  |
| MM18T | ZSWIM6   | zinc finger, SWIM-type containing 6                                  | CCDS47215.1 | chr5_60839548-60839548_C_A    | 1018L>I | Substitution | Nonsynonymous coding | 15%  |
| MM18T | ZSWIM7   | zinc finger, SWIM-type containing 7                                  | CCDS42266.1 | chr17_15890629-15890629_C_T   | 51R>Q   | Substitution | Nonsynonymous coding | 15%  |
| MM18T | ZUFSP    | zinc finger with UFM1-specific peptidase domain                      | CCDS5110.1  | chr6_116987922-116987922_G_T  | 145S>Y  | Substitution | Nonsynonymous coding | 11%  |
| MM18T | ZW10     | zw10 kinetochore protein                                             | CCDS8363.1  | chr11_113628466-113628466_C_G | 281M>I  | Substitution | Nonsynonymous coding | 12%  |
| MM18T | ZW10     | zw10 kinetochore protein                                             | CCDS8363.1  | chr11_113631053-113631053_C_T | 153C>Y  | Substitution | Nonsynonymous coding | 14%  |
| MM18T | ZZEF1    | zinc finger, ZZ-type with EF-hand domain 1                           | CCDS11043.1 | chr17_3919651-3919651_G_A     | 2704S>L | Substitution | Nonsynonymous coding | 17%  |
| MM18T | ZZEF1    | zinc finger, ZZ-type with EF-hand domain 1                           | CCDS11043.1 | chr17_3974144-3974144_G_T     | 1303F>L | Substitution | Nonsynonymous coding | 10%  |
| MM18T | ZZZ3     | zinc finger, ZZ-type containing 3                                    | CCDS677.1   | chr1_78099018-78099018_G_A    | 8R>C    | Substitution | Nonsynonymous coding | 10%  |
| MM19T | ALDH2    | aldehyde dehydrogenase 2 family (mitochondrial)                      | CCDS9155.1  | chr12_112204903-112204903_G_A | NA      | Substitution | Splice site donor    | 27%  |
| MM19T | APOE     | apolipoprotein E                                                     | CCDS12647.1 | chr19_45412172-45412172_C_T   | 207R>C  | Substitution | Nonsynonymous coding | 37%  |
| MM19T | C11orf71 | chromosome 11 open reading frame 71                                  | CCDS8369.2  | chr11_114270845-114270845_C_T | 70G>D   | Substitution | Nonsynonymous coding | 64%  |
| MM19T | CASP5    | caspase 5, apoptosis-related cysteine peptidase                      | CCDS44720.1 | chr11_104878041-104878041__T  | NA      | Insertion    | Frameshift           | 13%  |
| MM19T | CMTM4    | CKLF-like MARVEL transmembrane domain containing 4                   | CCDS10817.1 | chr16_66655971-66655971_A_C   | 206L>R  | Substitution | Nonsynonymous coding | 100% |
| MM19T | CP       | ceruloplasmin (ferroxidase)                                          | CCDS3141.1  | chr3_148901396-148901396_A_   | NA      | Deletion     | Splice site acceptor | 10%  |
| MM19T | EDC4     | enhancer of mRNA decapping 4                                         | CCDS10849.1 | chr16_67916970-67916970_C_T   | 1247R>C | Substitution | Nonsynonymous coding | 95%  |
| MM19T | ENPP5    | ectonucleotide pyrophosphatase/phosphodiesterase 5                   | CCDS4915.1  | chr6_46135884-46135884_C_T    | 39R>H   | Substitution | Nonsynonymous coding | 43%  |
| MM19T | FAAH2    | fatty acid amide hydrolase 2                                         | CCDS14375.1 | chrX_57367806-57367806_G_T    | 242G>V  | Substitution | Nonsynonymous coding | 15%  |
| MM19T | FAM50B   | family with sequence similarity 50, member B                         | CCDS4487.1  | chr6_3850509-3850509__A       | NA      | Insertion    | Frameshift           | 37%  |
| MM19T | FAM50B   | family with sequence similarity 50, member B                         | CCDS4487.1  | chr6_3850511-3850511_C_G      | 156R>G  | Substitution | Nonsynonymous coding | 34%  |
| MM19T | FBXW7    | F-box and WD repeat domain containing 7, E3 ubiquitin protein ligase | CCDS3777.1  | chr4_153247289-153247289_G_A  | 505R>C  | Substitution | Nonsynonymous coding | 93%  |
| MM19T | GMPPB    | GDP-mannose pyrophosphorylase B                                      | CCDS2802.1  | chr3_49760040-49760040_G_A    | 184Q>X  | Substitution | Nonsense             | 36%  |
| MM19T | GNLY     | granulysin                                                           | CCDS1984.1  | chr2_85924666-85924666_C_T    | 98T>M   | Substitution | Nonsynonymous coding | 63%  |
| MM19T | GUSB     | glucuronidase, beta                                                  | CCDS5530.1  | chr7_65426054-65426054_C_     | NA      | Deletion     | Splice site acceptor | 11%  |
| MM19T | HGFL1    | hepatoma derived growth factor-like 1                                | CCDS34347.1 | chr6_22570297-22570297_C_A    | 165P>T  | Substitution | Nonsynonymous coding | 31%  |
| MM19T | IDH2     | isocitrate dehydrogenase 2 (NADP+), mitochondrial                    | CCDS10359.1 | chr15_90634874-90634874_C_A   | 40A>S   | Substitution | Nonsynonymous coding | 43%  |
| MM19T | IGSF21   | immunoglobulin superfamily, member 21                                | CCDS184.1   | chr1_18691940-18691940_A_G    | 255N>S  | Substitution | Nonsynonymous coding | 24%  |
| MM19T | KCND2    | potassium voltage-gated channel, Shal-related subfamily, member 2    | CCDS5776.1  | chr7_119915600-119915600_G_A  | 305R>H  | Substitution | Nonsynonymous coding | 60%  |
| MM19T | KIAA1524 | Uncharacterized protein                                              | CCDS33812.1 | chr3_108276265-108276265_A_   | NA      | Deletion     | Splice site acceptor | 11%  |
| MM19T | KLB      | klotho beta                                                          | CCDS3451.1  | chr4_39439465-39439465_T_G    | 485S>R  | Substitution | Nonsynonymous coding | 41%  |



|       |          |                                                                               |                 |                               |         |              |                      |     |
|-------|----------|-------------------------------------------------------------------------------|-----------------|-------------------------------|---------|--------------|----------------------|-----|
| MM19T | KLHL23   | kelch-like family member 23                                                   | ENST00000448589 | chr2_170632961-170632961_AA   | NA      | Insertion    | Frameshift           | 13% |
| MM19T | LPA      | lipoprotein, Lp(a)                                                            | CCDS43523.1     | chr6_161022108-161022108_G_A  | 990R>X  | Substitution | Nonsense             | 54% |
| MM19T | MEGF8    | multiple EGF-like-domains 8                                                   | CCDS12604.2     | chr19_42861718-42861718_A_T   | 1598S>C | Substitution | Nonsynonymous coding | 41% |
| MM19T | MLL2     | myeloid/lymphoid or mixed-lineage leukemia 2                                  | CCDS44873.1     | chr12_49441853-49441853_C_T   | NA      | Substitution | Splice site acceptor | 62% |
| MM19T | MLL3     | myeloid/lymphoid or mixed-lineage leukemia 3                                  | CCDS5931.1      | chr7_151945256-151945256_G_A  | 755Q>X  | Substitution | Nonsense             | 19% |
| MM19T | MSANTD1  | Myb/SANT-like DNA-binding domain containing 1                                 | CCDS47003.1     | chr4_3251158-3251158_G_T      | 70R>L   | Substitution | Nonsynonymous coding | 20% |
| MM19T | MTFMT    | mitochondrial methionyl-tRNA formyltransferase                                | CCDS45280.1     | chr15_65312614-65312614_C_    | NA      | Deletion     | Splice site acceptor | 15% |
| MM19T | MYO9B    | myosin IXB                                                                    | CCDS46010.1     | chr19_17294680-17294680_A_    | NA      | Deletion     | Splice site donor    | 12% |
| MM19T | NLRP13   | NLR family, pyrin domain containing 13                                        | CCDS33119.1     | chr19_56422049-56422049_G_A   | 721T>M  | Substitution | Nonsynonymous coding | 55% |
| MM19T | NUP107   | nucleoporin 107kDa                                                            | CCDS8985.1      | chr12_69120338-69120338_C_G   | 546L>V  | Substitution | Nonsynonymous coding | 83% |
| MM19T | OR2A12   | olfactory receptor, family 2, subfamily A, member 12                          | CCDS43670.1     | chr7_143792747-143792747_G_A  | 183V>I  | Substitution | Nonsynonymous coding | 19% |
| MM19T | OTOP1    | otopetrin 1                                                                   | CCDS3372.1      | chr4_4228425-4228425_T_C      | 56K>R   | Substitution | Nonsynonymous coding | 27% |
| MM19T | PAPLN    | papilin, proteoglycan-like sulfated glycoprotein                              | CCDS32114.1     | chr14_73733304-73733304_G_A   | 1093R>Q | Substitution | Nonsynonymous coding | 49% |
| MM19T | PCSK9    | proprotein convertase subtilisin/kexin type 9                                 | CCDS603.1       | chr11_55518407-55518407_C_T   | 248R>C  | Substitution | Nonsynonymous coding | 11% |
| MM19T | PDZD3    | PDZ domain containing 3                                                       | CCDS8417.1      | chr11_119059846-119059846_C_T | 460L>F  | Substitution | Nonsynonymous coding | 27% |
| MM19T | PIK3CA   | phosphatidylinositol-4,5-bisphosphate 3-kinase, catalytic subunit alpha       | CCDS43171.1     | chr3_178917478-178917478_G_A  | 118G>D  | Substitution | Nonsynonymous coding | 66% |
| MM19T | PLEKHG5  | pleckstrin homology domain containing, family G (with RhoGef domain) member 5 | CCDS41240.1     | chr1_6528377-6528377_A_T      | 917V>E  | Substitution | Nonsynonymous coding | 32% |
| MM19T | POLI     | polymerase (DNA directed) iota                                                | CCDS11954.2     | chr18_51795960-51795960_A_G   | 15D>G   | Substitution | Nonsynonymous coding | 13% |
| MM19T | POU2AF1  | POU class 2 associating factor 1                                              | CCDS31675.1     | chr11_111229634-111229634_G_A | 9P>L    | Substitution | Nonsynonymous coding | 63% |
| MM19T | RBMX     | RNA binding motif protein, X-linked                                           | CCDS14661.1     | chrX_135961586-135961586_T    | NA      | Insertion    | Frameshift           | 18% |
| MM19T | RBMXL3   | RNA binding motif protein, X-linked-like 3                                    | NM_001145346    | chrX_114426289-114426289_G_A  | 762G>E  | Substitution | Nonsynonymous coding | 28% |
| MM19T | SLC22A5  | solute carrier family 22 (organic cation/carnitine transporter), member 5     | ENST00000430565 | chr5_131713905-131713905_C_G  | 148P>R  | Substitution | Nonsynonymous coding | 45% |
| MM19T | SLC27A6  | solute carrier family 27 (fatty acid transporter), member 6                   | CCDS4145.1      | chr5_128302182-128302182_T_   | NA      | Deletion     | Frameshift           | 46% |
| MM19T | SPPL2B   | signal peptide peptidase like 2B                                              | ENST00000452401 | chr19_2340160-2340160_G_C     | 276G>R  | Substitution | Nonsynonymous coding | 15% |
| MM19T | STARD3NL | STARD3 N-terminal like                                                        | CCDS5455.1      | chr7_38259211-38259211_C_G    | 200P>R  | Substitution | Nonsynonymous coding | 63% |
| MM19T | TP53     | tumor protein p53                                                             | CCDS11118.1     | chr17_7577120-7577120_C_T     | 273R>H  | Substitution | Nonsynonymous coding | 93% |
| MM19T | TPM2     | tropomyosin 2 (beta)                                                          | CCDS6587.1      | chr9_35683241-35683241_GG     | NA      | Insertion    | Splice site acceptor | 21% |
| MM19T | TPO      | thyroid peroxidase                                                            | CCDS1643.1      | chr2_1500454-1500454_G_A      | 768C>Y  | Substitution | Nonsynonymous coding | 23% |
| MM19T | TRIM37   | tripartite motif containing 37                                                | CCDS32694.1     | chr17_57141769-57141769_A_    | NA      | Deletion     | Splice site acceptor | 16% |
| MM19T | ZNF598   | zinc finger protein 598                                                       | ENST00000431526 | chr16_2059626-2059626_A_G     | 41L>P   | Substitution | Nonsynonymous coding | 11% |
| MM19T | ZNF598   | zinc finger protein 598                                                       | ENST00000431526 | chr16_2059627-2059627_G_C     | 41L>V   | Substitution | Nonsynonymous coding | 12% |
| MM19T | ZP3      | zona pellucida glycoprotein 3 (sperm receptor)                                | CCDS47618.1     | chr7_76069661-76069663_GAG_   | NA      | Deletion     | Splice site donor    | 15% |

|       |             |                                                                           |                 |                               |         |              |                      |     |
|-------|-------------|---------------------------------------------------------------------------|-----------------|-------------------------------|---------|--------------|----------------------|-----|
| MM20T | MARCH6      | membrane-associated ring finger (C3HC4) 6, E3 ubiquitin protein ligase    | CCDS34135.1     | chr5_10394236-10394236_A_T    | 270E>V  | Substitution | Nonsynonymous coding | 13% |
| MM20T | A2M         | alpha-2-macroglobulin                                                     | CCDS44827.1     | chr12_9220824-9220825_AA_     | NA      | Deletion     | Splice site acceptor | 16% |
| MM20T | A2M         | alpha-2-macroglobulin                                                     | CCDS44827.1     | chr12_9242623-9242623_AA      | NA      | Insertion    | Splice site acceptor | 14% |
| MM20T | ABCA2       | ATP-binding cassette, sub-family A (ABC1), member 2                       | CCDS43909.1     | chr9_139906010-139906010_C_T  | NA      | Substitution | Splice site acceptor | 25% |
| MM20T | ABCC3       | ATP-binding cassette, sub-family C (CFTR/MRP), member 3                   | CCDS32681.1     | chr17_48761436-48761436_G_A   | 1361D>N | Substitution | Nonsynonymous coding | 17% |
| MM20T | ABCC4       | ATP-binding cassette, sub-family C (CFTR/MRP), member 4                   | CCDS9474.1      | chr13_95673939-95673939_A_    | NA      | Deletion     | Splice site acceptor | 23% |
| MM20T | ABHD16B     | abhydrolase domain containing 16B                                         | CCDS13539.1     | chr20_62493114-62493114_G_A   | 74R>Q   | Substitution | Nonsynonymous coding | 16% |
| MM20T | ABI3BP      | ABI family, member 3 (NESH) binding protein                               | CCDS46880.1     | chr3_100570788-100570789_AA_  | NA      | Deletion     | Splice site acceptor | 17% |
| MM20T | AC008676.1  | Uncharacterized protein                                                   | ENST00000377571 | chr5_156811532-156811532_A_T  | 152Q>H  | Substitution | Nonsynonymous coding | 11% |
| MM20T | AC018755.11 | Uncharacterized protein                                                   | ENST00000301439 | chr19_52097561-52097561_AA    | NA      | Insertion    | Frameshift           | 15% |
| MM20T | ACOXL       | acyl-CoA oxidase-like                                                     | CCDS46389.1     | chr2_111556617-111556617_C_T  | 163R>W  | Substitution | Nonsynonymous coding | 10% |
| MM20T | ACSS2       | acyl-CoA synthetase short-chain family member 2                           | CCDS13243.1     | chr20_33502206-33502206_C_    | NA      | Deletion     | Frameshift           | 17% |
| MM20T | ADAM28      | ADAM metalloproteinase domain 28                                          | CCDS34865.1     | chr8_24167473-24167473_AA     | NA      | Insertion    | Frameshift           | 19% |
| MM20T | ADAMTS10    | ADAM metalloproteinase with thrombospondin type 1 motif, 10 [Source:HGNC] | CCDS12206.1     | chr19_8650467-8650467_C_T     | 913R>H  | Substitution | Nonsynonymous coding | 40% |
| MM20T | ADAMTS15    | ADAM metalloproteinase with thrombospondin type 1 motif, 15               | CCDS8488.1      | chr11_130332058-130332058_G_C | 389M>I  | Substitution | Nonsynonymous coding | 14% |
| MM20T | ADAMTS16    | ADAM metalloproteinase with thrombospondin type 1 motif, 16               | CCDS43299.1     | chr5_5242271-5242271_G_A      | 877V>M  | Substitution | Nonsynonymous coding | 13% |
| MM20T | ADAMTSL2    | ADAMTS-like 2                                                             | ENST00000393061 | chr9_136401735-136401735_G_A  | 76W>X   | Substitution | Nonsense             | 19% |
| MM20T | ADAMTSL4    | ADAMTS-like 4                                                             | CCDS955.1       | chr1_150530506-150530506_G_   | NA      | Deletion     | Frameshift           | 13% |
| MM20T | ADCK3       | aarF domain containing kinase 3                                           | CCDS1557.1      | chr1_227149210-227149210_G_A  | 42A>T   | Substitution | Nonsynonymous coding | 24% |
| MM20T | ADCY5       | adenylate cyclase 5                                                       | CCDS3022.1      | chr3_123038568-123038568_C_T  | 737V>I  | Substitution | Nonsynonymous coding | 25% |
| MM20T | ADCY7       | adenylate cyclase 7                                                       | CCDS10741.1     | chr16_50338374-50338374_G_    | NA      | Deletion     | Frameshift           | 34% |
| MM20T | ADNP        | activity-dependent neuroprotector homeobox                                | CCDS13433.1     | chr20_49508204-49508204_T_    | NA      | Deletion     | Frameshift           | 20% |
| MM20T | ADRA1B      | adrenoceptor alpha 1B                                                     | CCDS4347.1      | chr5_159344376-159344376_C_T  | 155T>M  | Substitution | Nonsynonymous coding | 22% |
| MM20T | AFAP1L1     | actin filament associated protein 1-like 1                                | CCDS34274.1     | chr5_148697448-148697448_G_A  | 475R>Q  | Substitution | Nonsynonymous coding | 15% |
| MM20T | AFF2        | AF4/FMR2 family, member 2                                                 | CCDS14684.1     | chrX_148072819-148072819_G_A  | 1298R>H | Substitution | Nonsynonymous coding | 19% |
| MM20T | AFF4        | AF4/FMR2 family, member 4                                                 | CCDS4164.1      | chr5_132223814-132223814_T    | NA      | Insertion    | Frameshift           | 42% |
| MM20T | AGTPBP1     | ATP/GTP binding protein 1                                                 | CCDS6672.1      | chr9_88201756-88201756_C_T    | 968R>H  | Substitution | Nonsynonymous coding | 24% |
| MM20T | AGXT        | alanine-glyoxylate aminotransferase                                       | CCDS2543.1      | chr2_241808645-241808645_C_T  | 75T>I   | Substitution | Nonsynonymous coding | 14% |
| MM20T | AHSA1       | AHA1, activator of heat shock 90kDa protein ATPase homolog 1 (yeast)      | CCDS9863.1      | chr14_77934474-77934474_G_A   | 247G>S  | Substitution | Nonsynonymous coding | 16% |
| MM20T | AIFM1       | apoptosis-inducing factor, mitochondrion-associated, 1                    | CCDS14618.1     | chrX_129273771-129273771_T    | NA      | Insertion    | Frameshift           | 15% |
| MM20T | AJUBA       | ajuba LIM protein                                                         | CCDS9581.1      | chr14_23450684-23450685_CA_   | NA      | Deletion     | Frameshift           | 33% |
| MM20T | AKAP13      | A kinase (PRKA) anchor protein 13                                         | CCDS32320.1     | chr15_86269701-86269701_A_G   | 2273Y>C | Substitution | Nonsynonymous coding | 13% |

|       |           |                                                                            |             |                               |         |              |                      |     |
|-------|-----------|----------------------------------------------------------------------------|-------------|-------------------------------|---------|--------------|----------------------|-----|
| MM20T | AKT1S1    | AKT1 substrate 1 (proline-rich)                                            | CCDS12784.1 | chr19_50373233-50373233__C    | NA      | Insertion    | Frameshift           | 16% |
| MM20T | ALDH1A2   | aldehyde dehydrogenase 1 family, member A2                                 | CCDS10163.1 | chr15_58247409-58247409__G    | NA      | Insertion    | Frameshift           | 20% |
| MM20T | ALDH1L2   | aldehyde dehydrogenase 1 family, member L2                                 | CCDS31891.1 | chr12_105420403-105420403_A_C | 879V>G  | Substitution | Nonsynonymous coding | 30% |
| MM20T | ALDH6A1   | aldehyde dehydrogenase 6 family, member A1                                 | CCDS9826.1  | chr14_74539281-74539281_C_T   | 49V>I   | Substitution | Nonsynonymous coding | 27% |
| MM20T | ALDH6A1   | aldehyde dehydrogenase 6 family, member A1                                 | CCDS9826.1  | chr14_74534275-74534275_A_    | NA      | Deletion     | Splice site acceptor | 14% |
| MM20T | ALK       | anaplastic lymphoma receptor tyrosine kinase                               | CCDS33172.1 | chr2_29416473-29416473_C_T    | 1494G>R | Substitution | Nonsynonymous coding | 15% |
| MM20T | ALPK2     | alpha-kinase 2                                                             | CCDS11966.2 | chr18_56246440-56246440_T_    | NA      | Deletion     | Frameshift           | 17% |
| MM20T | ALS2CR11  | amyotrophic lateral sclerosis 2 (juvenile) chromosome region, candidate 11 | CCDS2349.1  | chr2_202466515-202466515_C_T  | 155D>N  | Substitution | Nonsynonymous coding | 25% |
| MM20T | AMIGO1    | adhesion molecule with Ig-like domain 1                                    | CCDS30795.1 | chr1_110050585-110050585_G_A  | 317T>I  | Substitution | Nonsynonymous coding | 18% |
| MM20T | AMPD3     | adenosine monophosphate deaminase 3                                        | CCDS7802.1  | chr11_10516499-10516499_G_    | NA      | Deletion     | Frameshift           | 15% |
| MM20T | ANGPT2    | angiopoietin 2                                                             | CCDS5958.1  | chr8_6378798-6378798_T_       | NA      | Deletion     | Frameshift           | 19% |
| MM20T | ANKH      | ankylosis, progressive homolog (mouse)                                     | CCDS3885.1  | chr5_14751243-14751243_G_T    | 208L>M  | Substitution | Nonsynonymous coding | 16% |
| MM20T | ANKRD12   | ankyrin repeat domain 12                                                   | CCDS11843.1 | chr18_9275622-9275622__T      | NA      | Insertion    | Frameshift           | 25% |
| MM20T | ANKRD17   | ankyrin repeat domain 17                                                   | CCDS34004.1 | chr4_74005944-74005944_C_A    | 797G>C  | Substitution | Nonsynonymous coding | 20% |
| MM20T | ANKRD26   | ankyrin repeat domain 26                                                   | CCDS41499.1 | chr10_27333122-27333124_AAA_  | NA      | Deletion     | Splice site acceptor | 29% |
| MM20T | ANKRD53   | ankyrin repeat domain 53                                                   | CCDS46321.1 | chr2_71206369-71206369_G_A    | 105A>T  | Substitution | Nonsynonymous coding | 28% |
| MM20T | AP1S1     | adaptor-related protein complex 1, sigma 1 subunit                         | CCDS47669.1 | chr7_100802405-100802405_G_   | NA      | Deletion     | Frameshift           | 20% |
| MM20T | AP1S1     | adaptor-related protein complex 1, sigma 1 subunit                         | CCDS47669.1 | chr7_100802405-100802405__G   | NA      | Insertion    | Frameshift           | 17% |
| MM20T | APCDD1    | adenomatosis polyposis coli down-regulated 1                               | CCDS11849.1 | chr18_10471837-10471837_G_A   | 185V>M  | Substitution | Nonsynonymous coding | 23% |
| MM20T | APIP      | APAF1 interacting protein                                                  | CCDS7895.1  | chr11_34910341-34910341_T_    | NA      | Deletion     | Frameshift           | 11% |
| MM20T | AQP2      | aquaporin 2 (collecting duct)                                              | CCDS8792.1  | chr12_50344759-50344759_G_A   | 49G>D   | Substitution | Nonsynonymous coding | 28% |
| MM20T | ARAF      | v-raf murine sarcoma 3611 viral oncogene homolog                           | CCDS35232.1 | chrX_47426415-47426415_C_     | NA      | Deletion     | Frameshift           | 23% |
| MM20T | ARHGAP22  | Rho GTPase activating protein 22                                           | CCDS7227.1  | chr10_49654487-49654487_A_    | NA      | Deletion     | Frameshift           | 18% |
| MM20T | ARHGAP28  | Rho GTPase activating protein 28                                           | CCDS32785.1 | chr18_6873513-6873513_T_      | NA      | Deletion     | Frameshift           | 28% |
| MM20T | ARHGAP31  | Rho GTPase activating protein 31                                           | CCDS43135.1 | chr3_119133120-119133120_C_A  | 782P>T  | Substitution | Nonsynonymous coding | 17% |
| MM20T | ARHGAP31  | Rho GTPase activating protein 31                                           | CCDS43135.1 | chr3_119133651-119133651_C_T  | 959P>S  | Substitution | Nonsynonymous coding | 11% |
| MM20T | ARHGAP32  | Rho GTPase activating protein 32                                           | CCDS44769.1 | chr11_128838923-128838923_T_C | 2048Y>C | Substitution | Nonsynonymous coding | 17% |
| MM20T | ARHGAP6   | Rho GTPase activating protein 6                                            | CCDS14140.1 | chrX_11162207-11162207_G_A    | 690P>L  | Substitution | Nonsynonymous coding | 22% |
| MM20T | ARHGDI1A  | Rho GDP dissociation inhibitor (GDI) alpha                                 | CCDS11788.1 | chr17_79826886-79826886_G_A   | 161P>S  | Substitution | Nonsynonymous coding | 17% |
| MM20T | ARHGEF10  | Rho guanine nucleotide exchange factor (GEF) 10                            | CCDS34794.1 | chr8_1853806-1853806_G_T      | 631G>X  | Substitution | Nonsense             | 17% |
| MM20T | ARHGEF10L | Rho guanine nucleotide exchange factor (GEF) 10-like                       | CCDS182.1   | chr1_18021704-18021704_G_T    | 1079W>L | Substitution | Nonsynonymous coding | 22% |
| MM20T | ARHGEF2   | Rho/Rac guanine nucleotide exchange factor (GEF) 2                         | CCDS1125.1  | chr1_155924735-155924735_G_   | NA      | Deletion     | Frameshift           | 18% |

|       |          |                                                                      |                 |                               |        |              |                      |     |
|-------|----------|----------------------------------------------------------------------|-----------------|-------------------------------|--------|--------------|----------------------|-----|
| MM20T | ARID1A   | AT rich interactive domain 1A (SWI-like)                             | CCDS285.1       | chr1_27088682-27088682_C_     | NA     | Deletion     | Frameshift           | 18% |
| MM20T | ARID1A   | AT rich interactive domain 1A (SWI-like)                             | CCDS285.1       | chr1_27105931-27105931_G      | NA     | Insertion    | Frameshift           | 14% |
| MM20T | ARMCX3   | armadillo repeat containing, X-linked 3                              | CCDS14489.1     | chrX_100880730-100880730_C_T  | 254A>V | Substitution | Nonsynonymous coding | 22% |
| MM20T | ASB15    | ankyrin repeat and SOCS box containing 15                            | CCDS34742.1     | chr7_123264628-123264628_A_   | NA     | Deletion     | Frameshift           | 23% |
| MM20T | ASCC3    | activating signal cointegrator 1 complex subunit 3                   | CCDS5046.1      | chr6_101296336-101296336_A    | NA     | Insertion    | Frameshift           | 13% |
| MM20T | ASGR1    | asialoglycoprotein receptor 1                                        | ENST00000380920 | chr17_7081747-7081747_C_T     | 46A>T  | Substitution | Nonsynonymous coding | 19% |
| MM20T | ASH2L    | ash2 (absent, small, or homeotic)-like (Drosophila)                  | CCDS6101.1      | chr8_37971770-37971770_A_     | NA     | Deletion     | Frameshift           | 20% |
| MM20T | ASPH     | aspartate beta-hydroxylase                                           | CCDS34898.1     | chr8_62550925-62550925_AA_    | NA     | Deletion     | Splice site acceptor | 29% |
| MM20T | ASPM     | asp (abnormal spindle) homolog, microcephaly associated (Drosophila) | CCDS1389.1      | chr1_197073232-197073232_T    | NA     | Insertion    | Frameshift           | 18% |
| MM20T | ATF5     | activating transcription factor 5                                    | CCDS12789.1     | chr19_50434202-50434202_C_T   | 32P>L  | Substitution | Nonsynonymous coding | 22% |
| MM20T | ATG2B    | autophagy related 2B                                                 | CCDS9944.2      | chr14_96761299-96761299_A_    | NA     | Deletion     | Frameshift           | 18% |
| MM20T | ATM      | ataxia telangiectasia mutated                                        | CCDS31669.1     | chr11_108216477-108216477_A_  | NA     | Deletion     | Frameshift           | 31% |
| MM20T | ATP1A1   | ATPase, Na+/K+ transporting, alpha 1 polypeptide                     | CCDS887.1       | chr1_116929958-116929958_A_G  | 78N>D  | Substitution | Nonsynonymous coding | 22% |
| MM20T | ATP2B1   | ATPase, Ca++ transporting, plasma membrane 1                         | CCDS9035.1      | chr12_90021461-90021461_T_G   | 321N>H | Substitution | Nonsynonymous coding | 16% |
| MM20T | ATP2C2   | ATPase, Ca++ transporting, type 2C, member 2                         | CCDS42207.1     | chr16_84492752-84492752_T_    | NA     | Deletion     | Frameshift           | 15% |
| MM20T | ATP6V1H  | ATPase, H+ transporting, lysosomal 50/57kDa, V1 subunit H            | CCDS6153.1      | chr8_54742096-54742097_AA_    | NA     | Deletion     | Splice site acceptor | 17% |
| MM20T | ATRX     | alpha thalassemia/mental retardation syndrome X-linked               | CCDS14434.1     | chrX_76937880-76937880_T_     | NA     | Deletion     | Frameshift           | 19% |
| MM20T | AURKC    | aurora kinase C                                                      | CCDS33128.1     | chr19_57746320-57746320_A_    | NA     | Deletion     | Frameshift           | 17% |
| MM20T | AVP      | arginine vasopressin                                                 | CCDS13045.1     | chr20_3065267-3065269_GGA_    | NA     | Deletion     | In-frame deletion    | 16% |
| MM20T | AXIN2    | axin 2                                                               | CCDS11662.1     | chr17_63532577-63532577_C_T   | 668G>R | Substitution | Nonsynonymous coding | 35% |
| MM20T | AZIN1    | antizyme inhibitor 1                                                 | CCDS6295.1      | chr8_103852031-103852031_A_   | NA     | Deletion     | Frameshift           | 12% |
| MM20T | B4GALNT2 | beta-1,4-N-acetyl-galactosaminyl transferase 2                       | CCDS11544.1     | chr17_47243599-47243599_A_    | NA     | Deletion     | Frameshift           | 25% |
| MM20T | BACE2    | beta-site APP-cleaving enzyme 2                                      | CCDS13668.1     | chr21_42540489-42540489_C     | NA     | Insertion    | Frameshift           | 10% |
| MM20T | BAI2     | brain-specific angiogenesis inhibitor 2                              | CCDS346.2       | chr1_32208525-32208525_C_T    | 389R>Q | Substitution | Nonsynonymous coding | 31% |
| MM20T | BAI3     | brain-specific angiogenesis inhibitor 3                              | CCDS4968.1      | chr6_69348923-69348923_T_     | NA     | Deletion     | Frameshift           | 14% |
| MM20T | BAX      | BCL2-associated X protein                                            | CCDS12744.1     | chr19_49458971-49458971_G_    | NA     | Deletion     | Frameshift           | 19% |
| MM20T | BCL11B   | B-cell CLL/lymphoma 11B (zinc finger protein)                        | CCDS9950.1      | chr14_99724077-99724077_G_T   | 53P>H  | Substitution | Nonsynonymous coding | 20% |
| MM20T | BCL9L    | B-cell CLL/lymphoma 9-like                                           | CCDS8403.1      | chr11_118772623-118772623_C_T | 610R>Q | Substitution | Nonsynonymous coding | 30% |
| MM20T | BCMO1    | beta-carotene 15,15'-monooxygenase 1                                 | CCDS10934.1     | chr16_81303852-81303852_A_G   | 311N>S | Substitution | Nonsynonymous coding | 18% |
| MM20T | BCOR     | BCL6 corepressor                                                     | CCDS48093.1     | chrX_39933640-39933640_G_A    | 320A>V | Substitution | Nonsynonymous coding | 27% |
| MM20T | BICC1    | bicaudal C homolog 1 (Drosophila)                                    | CCDS31206.1     | chr10_60558977-60558977_A_    | NA     | Deletion     | Frameshift           | 22% |
| MM20T | BICC1    | bicaudal C homolog 1 (Drosophila)                                    | CCDS31206.1     | chr10_60560744-60560744_G_T   | 651K>N | Substitution | Nonsynonymous coding | 29% |

|       |          |                                                                |                 |                              |         |              |                      |     |
|-------|----------|----------------------------------------------------------------|-----------------|------------------------------|---------|--------------|----------------------|-----|
| MM20T | BMP2     | bone morphogenetic protein 2                                   | CCDS13099.1     | chr20_6751041-6751041_C_T    | 90P>S   | Substitution | Nonsynonymous coding | 20% |
| MM20T | BOD1L1   | biorientation of chromosomes in cell division 1-like 1         | CCDS3411.2      | chr4_13582681-13582682_AA_   | NA      | Deletion     | Splice site acceptor | 30% |
| MM20T | BRCA1    | breast cancer 1, early onset                                   | CCDS11453.1     | chr17_41245587-41245587_T_   | NA      | Deletion     | Frameshift           | 16% |
| MM20T | BRD8     | bromodomain containing 8                                       | CCDS4198.1      | chr5_137496760-137496760_A_  | NA      | Deletion     | Splice site acceptor | 32% |
| MM20T | BRSK1    | BR serine/threonine kinase 1                                   | CCDS12921.1     | chr19_55815036-55815036_C    | NA      | Insertion    | Frameshift           | 14% |
| MM20T | BRWD1    | bromodomain and WD repeat domain containing 1                  | CCDS13662.1     | chr21_40619685-40619685_C_A  | 808R>I  | Substitution | Nonsynonymous coding | 19% |
| MM20T | BRWD1    | bromodomain and WD repeat domain containing 1                  | CCDS13662.1     | chr21_40622756-40622756_C_T  | 772G>E  | Substitution | Nonsynonymous coding | 18% |
| MM20T | BRWD3    | bromodomain and WD repeat domain containing 3                  | CCDS14447.1     | chrX_79991591-79991593_AAA_  | NA      | Deletion     | Splice site acceptor | 32% |
| MM20T | BSG      | basigin (Ok blood group)                                       | CCDS12033.1     | chr19_579603-579603_G_       | NA      | Deletion     | Frameshift           | 11% |
| MM20T | BSN      | bassoon presynaptic cytomatrix protein                         | CCDS2800.1      | chr3_49690555-49690555_A_G   | 1189E>G | Substitution | Nonsynonymous coding | 16% |
| MM20T | BTK      | Bruton agammaglobulinemia tyrosine kinase                      | CCDS14482.1     | chrX_100630172-100630172_A_G | 34V>A   | Substitution | Nonsynonymous coding | 16% |
| MM20T | BTN3A3   | butyrophilin, subfamily 3, member A3                           | CCDS4611.1      | chr6_26452438-26452439_AG_   | NA      | Deletion     | Frameshift           | 21% |
| MM20T | BZW2     | basic leucine zipper and W2 domains 2                          | CCDS5362.1      | chr7_16729479-16729479_C_T   | 200A>V  | Substitution | Nonsynonymous coding | 22% |
| MM20T | C19orf25 | chromosome 19 open reading frame 25                            | CCDS45898.1     | chr19_1478849-1478849_G      | NA      | Insertion    | Frameshift           | 11% |
| MM20T | C1orf191 | chromosome 1 open reading frame 191                            | ENST00000361350 | chr1_54703918-54703918_G_A   | 60R>Q   | Substitution | Nonsynonymous coding | 18% |
| MM20T | C1orf74  | chromosome 1 open reading frame 74                             | CCDS1491.1      | chr1_209956420-209956420_A_G | 187L>P  | Substitution | Nonsynonymous coding | 17% |
| MM20T | C20orf85 | chromosome 20 open reading frame 85                            | CCDS13465.1     | chr20_56735727-56735727_C    | NA      | Insertion    | Frameshift           | 19% |
| MM20T | C20orf96 | chromosome 20 open reading frame 96                            | CCDS12994.1     | chr20_257705-257705_T        | NA      | Insertion    | Frameshift           | 25% |
| MM20T | C2orf42  | chromosome 2 open reading frame 42                             | CCDS1899.1      | chr2_70406777-70406777_A     | NA      | Insertion    | Splice site acceptor | 19% |
| MM20T | C7orf26  | chromosome 7 open reading frame 26                             | CCDS5353.1      | chr7_6647670-6647670_C_A     | 410H>N  | Substitution | Nonsynonymous coding | 19% |
| MM20T | C8orf59  | chromosome 8 open reading frame 59                             | NM_001099670    | chr8_86126820-86126820_G_A   | 91A>V   | Substitution | Nonsynonymous coding | 13% |
| MM20T | C9orf16  | chromosome 9 open reading frame 16                             | CCDS6893.1      | chr9_130922735-130922735_G_A | 17E>K   | Substitution | Nonsynonymous coding | 12% |
| MM20T | CACNA1A  | calcium channel, voltage-dependent, P/Q type, alpha 1A subunit | CCDS45998.1     | chr19_13395983-13395983_T_   | NA      | Deletion     | Frameshift           | 25% |
| MM20T | CACNA1H  | calcium channel, voltage-dependent, T type, alpha 1H subunit   | CCDS45375.1     | chr16_1270085-1270085_G_     | NA      | Deletion     | Frameshift           | 14% |
| MM20T | CACNA1H  | calcium channel, voltage-dependent, T type, alpha 1H subunit   | CCDS45375.1     | chr16_1270496-1270496_C_     | NA      | Deletion     | Frameshift           | 17% |
| MM20T | CACNA1I  | calcium channel, voltage-dependent, T type, alpha 1I subunit   | CCDS46710.1     | chr22_40064351-40064351_T_C  | 1387Y>H | Substitution | Nonsynonymous coding | 23% |
| MM20T | CACNB1   | calcium channel, voltage-dependent, beta 1 subunit             | CCDS42311.1     | chr17_37341120-37341120_G_   | NA      | Deletion     | Splice site acceptor | 22% |
| MM20T | CACTIN   | cactin, spliceosome C complex subunit                          | CCDS45920.1     | chr19_3611921-3611921_T_C    | 759*>W  | Substitution | Nonsynonymous coding | 13% |
| MM20T | CAMSAP1  | calmodulin regulated spectrin-associated protein 1             | CCDS35176.2     | chr9_138710415-138710415_C_T | 1336R>Q | Substitution | Nonsynonymous coding | 11% |
| MM20T | CAPN13   | calpain 13                                                     | CCDS46252.1     | chr2_30966421-30966421_C_T   | 425V>M  | Substitution | Nonsynonymous coding | 13% |
| MM20T | CASZ1    | castor zinc finger 1                                           | CCDS41246.1     | chr1_10720540-10720540_C_T   | 187G>S  | Substitution | Nonsynonymous coding | 23% |
| MM20T | CATSPER2 | cation channel, sperm associated 2                             | CCDS10099.1     | chr15_43931187-43931189_AGA_ | 252FY>Y | Deletion     | In-frame deletion    | 29% |

|       |          |                                                      |                 |                               |        |              |                      |     |
|-------|----------|------------------------------------------------------|-----------------|-------------------------------|--------|--------------|----------------------|-----|
| MM20T | CATSPER2 | cation channel, sperm associated 2                   | CCDS10099.1     | chr15_43931193-43931193_A_T   | 251F>I | Substitution | Nonsynonymous coding | 10% |
| MM20T | CBX2     | chromobox homolog 2                                  | CCDS32757.1     | chr17_77757750-77757750_C_    | NA     | Deletion     | Frameshift           | 24% |
| MM20T | CBX8     | chromobox homolog 8                                  | CCDS11765.1     | chr17_77768648-77768648_C     | NA     | Insertion    | Frameshift           | 14% |
| MM20T | CCDC112  | coiled-coil domain containing 112                    | CCDS34213.1     | chr5_114605499-114605500_AA_  | NA     | Deletion     | Splice site acceptor | 18% |
| MM20T | CCDC124  | coiled-coil domain containing 124                    | CCDS12369.1     | chr19_18054334-18054334_C_T   | 161A>V | Substitution | Nonsynonymous coding | 14% |
| MM20T | CCDC15   | coiled-coil domain containing 15                     | CCDS44756.1     | chr11_124845049-124845049_A_  | NA     | Deletion     | Frameshift           | 18% |
| MM20T | CCDC150  | coiled-coil domain containing 150                    | CCDS46478.1     | chr2_197531519-197531520_AA_  | NA     | Deletion     | Frameshift           | 26% |
| MM20T | CCDC157  | coiled-coil domain containing 157                    | CCDS33632.2     | chr22_30772244-30772244_G_    | NA     | Deletion     | Splice site acceptor | 44% |
| MM20T | CCDC175  | coiled-coil domain containing 175                    | NM_001164399    | chr14_60041750-60041750_AA    | NA     | Insertion    | Splice site acceptor | 40% |
| MM20T | CCDC178  | coiled-coil domain containing 178                    | CCDS42424.1     | chr18_30913143-30913143_T_    | NA     | Deletion     | Frameshift           | 39% |
| MM20T | CCDC36   | coiled-coil domain containing 36                     | CCDS33755.2     | chr3_49294570-49294570_T_     | NA     | Deletion     | Frameshift           | 16% |
| MM20T | CCDC6    | coiled-coil domain containing 6                      | CCDS7257.1      | chr10_61612347-61612349_TTC_  | 139E>- | Deletion     | In-frame deletion    | 16% |
| MM20T | CCDC63   | coiled-coil domain containing 63                     | CCDS9151.1      | chr12_111336860-111336860_G_A | 425A>T | Substitution | Nonsynonymous coding | 16% |
| MM20T | CCDC85A  | coiled-coil domain containing 85A                    | CCDS46290.1     | chr2_56420003-56420003_A_T    | 223D>V | Substitution | Nonsynonymous coding | 16% |
| MM20T | CCDC85C  | coiled-coil domain containing 85C                    | CCDS45161.1     | chr14_100070262-100070262_G_A | 12S>L  | Substitution | Nonsynonymous coding | 12% |
| MM20T | CCKBR    | cholecystokinin B receptor                           | CCDS7761.1      | chr11_6291926-6291926_C_T     | 235A>V | Substitution | Nonsynonymous coding | 16% |
| MM20T | CCL5     | chemokine (C-C motif) ligand 5                       | CCDS11300.1     | chr17_34199437-34199438_CA_   | NA     | Deletion     | Frameshift           | 24% |
| MM20T | CCSER1   | coiled-coil serine-rich protein 1                    | CCDS47099.1     | chr4_91230086-91230086_AG     | NA     | Insertion    | Frameshift           | 16% |
| MM20T | CD34     | CD34 molecule                                        | ENST00000367036 | chr1_208063101-208063101_A_   | NA     | Deletion     | Frameshift           | 31% |
| MM20T | CD38     | CD38 molecule                                        | CCDS3417.1      | chr4_15839743-15839743_A_G    | 205H>R | Substitution | Nonsynonymous coding | 22% |
| MM20T | CDH10    | cadherin 10, type 2 (T2-cadherin)                    | CCDS3892.1      | chr5_24488085-24488085_T_     | NA     | Deletion     | Frameshift           | 16% |
| MM20T | CDH19    | cadherin 19, type 2                                  | CCDS11994.1     | chr18_64178925-64178925_A_    | NA     | Deletion     | Splice site acceptor | 31% |
| MM20T | CDH26    | cadherin 26                                          | CCDS13485.1     | chr20_58587784-58587784_A_    | NA     | Deletion     | Frameshift           | 24% |
| MM20T | CDHR3    | cadherin-related family member 3                     | CCDS47684.1     | chr7_105658306-105658306_G_T  | 481G>X | Substitution | Nonsense             | 21% |
| MM20T | CDK13    | cyclin-dependent kinase 13                           | CCDS5461.1      | chr7_39990717-39990717_G_     | NA     | Deletion     | Frameshift           | 14% |
| MM20T | CDKL1    | cyclin-dependent kinase-like 1 (CDC2-related kinase) | ENST00000356146 | chr14_50846941-50846941_C_T   | 327R>Q | Substitution | Nonsynonymous coding | 18% |
| MM20T | CDKN1B   | cyclin-dependent kinase inhibitor 1B (p27, Kip1)     | CCDS8653.1      | chr12_12871001-12871001_G_A   | 76W>X  | Substitution | Nonsense             | 16% |
| MM20T | CDO1     | cysteine dioxygenase, type I                         | CCDS4121.1      | chr5_115148958-115148958_A_   | NA     | Deletion     | Splice site acceptor | 29% |
| MM20T | CEP72    | centrosomal protein 72kDa                            | CCDS34126.1     | chr5_633921-633921_G_A        | 184A>T | Substitution | Nonsynonymous coding | 22% |
| MM20T | CES1     | carboxylesterase 1                                   | CCDS32450.1     | chr16_55844925-55844926_AA_   | NA     | Deletion     | Splice site acceptor | 14% |
| MM20T | CHD9     | chromodomain helicase DNA binding protein 9          | CCDS45485.1     | chr16_53260307-53260307_A_    | NA     | Deletion     | Frameshift           | 15% |
| MM20T | CHRNA10  | cholinergic receptor, nicotinic, alpha 10 (neuronal) | CCDS7745.1      | chr11_3688723-3688723_G_A     | 212R>C | Substitution | Nonsynonymous coding | 13% |

|       |         |                                                                                  |             |                               |         |              |                      |     |
|-------|---------|----------------------------------------------------------------------------------|-------------|-------------------------------|---------|--------------|----------------------|-----|
| MM20T | CHST1   | carbohydrate (keratan sulfate Gal-6) sulfotransferase 1                          | CCDS7913.1  | chr11_45672265-45672265_C_T   | 70R>H   | Substitution | Nonsynonymous coding | 15% |
| MM20T | CHST6   | carbohydrate (N-acetylglucosamine 6-O) sulfotransferase 6                        | CCDS10918.1 | chr16_75513509-75513509_G_A   | 73A>V   | Substitution | Nonsynonymous coding | 30% |
| MM20T | CKAP2   | cytoskeleton associated protein 2                                                | CCDS41893.1 | chr13_53049034-53049034_A     | NA      | Insertion    | Frameshift           | 27% |
| MM20T | CLEC12B | C-type lectin domain family 12, member B                                         | CCDS44830.1 | chr12_10171025-10171025_T_    | NA      | Deletion     | Frameshift           | 18% |
| MM20T | CLIP1   | CAP-GLY domain containing linker protein 1                                       | CCDS9232.1  | chr12_122839753-122839753_C_A | 371R>L  | Substitution | Nonsynonymous coding | 22% |
| MM20T | CLSTN2  | calsyntenin 2                                                                    | CCDS3112.1  | chr3_140275475-140275475_C_T  | 599R>W  | Substitution | Nonsynonymous coding | 33% |
| MM20T | CLSTN3  | calsyntenin 3                                                                    | CCDS8575.1  | chr12_7293857-7293857_A_G     | 448H>R  | Substitution | Nonsynonymous coding | 16% |
| MM20T | CLTCL1  | clathrin, heavy chain-like 1                                                     | CCDS46662.1 | chr22_19211491-19211491_C_A   | 739G>W  | Substitution | Nonsynonymous coding | 17% |
| MM20T | CNGA2   | cyclic nucleotide gated channel alpha 2                                          | CCDS14701.1 | chrX_150909342-150909342_G_A  | 151V>I  | Substitution | Nonsynonymous coding | 17% |
| MM20T | CNPY4   | canopy 4 homolog (zebrafish)                                                     | CCDS34701.1 | chr7_99717402-99717402_T_     | NA      | Deletion     | Frameshift           | 16% |
| MM20T | CNTN3   | contactin 3 (plasmacytoma associated)                                            | CCDS33790.1 | chr3_74313585-74313585_T_C    | 1018I>M | Substitution | Nonsynonymous coding | 12% |
| MM20T | CNTN4   | contactin 4                                                                      | CCDS43041.1 | chr3_2861248-2861248_C_T      | 146P>L  | Substitution | Nonsynonymous coding | 15% |
| MM20T | CNTNAP2 | contactin associated protein-like 2                                              | CCDS5889.1  | chr7_147336307-147336307_G_T  | 669M>I  | Substitution | Nonsynonymous coding | 23% |
| MM20T | CNTNAP4 | contactin associated protein-like 4                                              | NM_138994   | chr16_76461397-76461397_C_A   | 122Q>K  | Substitution | Nonsynonymous coding | 10% |
| MM20T | COBL    | cordons-bleu WH2 repeat protein                                                  | CCDS34637.1 | chr7_51096959-51096959_G_A    | 612R>C  | Substitution | Nonsynonymous coding | 31% |
| MM20T | COL17A1 | collagen, type XVII, alpha 1                                                     | CCDS7554.1  | chr10_105817907-105817907_C_T | 422A>T  | Substitution | Nonsynonymous coding | 18% |
| MM20T | COL4A4  | collagen, type IV, alpha 4                                                       | CCDS42828.1 | chr2_227968772-227968772_A_   | NA      | Deletion     | Splice site acceptor | 23% |
| MM20T | COL6A1  | collagen, type VI, alpha 1                                                       | CCDS13727.1 | chr21_47404355-47404355_A     | NA      | Insertion    | Frameshift           | 16% |
| MM20T | COQ3    | coenzyme Q3 homolog, methyltransferase ( <i>S. cerevisiae</i> )                  | CCDS5042.1  | chr6_99817700-99817701_AA_    | NA      | Deletion     | Splice site acceptor | 26% |
| MM20T | COQ3    | coenzyme Q3 homolog, methyltransferase ( <i>S. cerevisiae</i> )                  | CCDS5042.1  | chr6_99817700-99817700_A_     | NA      | Deletion     | Splice site acceptor | 12% |
| MM20T | CORIN   | corin, serine peptidase                                                          | CCDS3477.1  | chr4_47695103-47695103_A_     | NA      | Deletion     | Splice site acceptor | 23% |
| MM20T | CORIN   | corin, serine peptidase                                                          | CCDS3477.1  | chr4_47695103-47695104_AA_    | NA      | Deletion     | Splice site acceptor | 17% |
| MM20T | CRAT    | carnitine O-acetyltransferase                                                    | CCDS6919.1  | chr9_131864814-131864814_C_   | NA      | Deletion     | Frameshift           | 30% |
| MM20T | CREBBP  | CREB binding protein                                                             | CCDS10509.1 | chr16_3808053-3808054_AA_     | ISV-4>  | Deletion     | Splice site acceptor | 29% |
| MM20T | CRNN    | cornulin                                                                         | CCDS1010.1  | chr1_152382710-152382710_G_A  | 283T>I  | Substitution | Nonsynonymous coding | 17% |
| MM20T | CRTAM   | cytotoxic and regulatory T cell molecule                                         | CCDS8437.1  | chr11_122726409-122726409_C_T | 166T>M  | Substitution | Nonsynonymous coding | 24% |
| MM20T | CSMD1   | CUB and Sushi multiple domains 1                                                 | NM_033225   | chr8_3611479-3611479_G_A      | 302R>C  | Substitution | Nonsynonymous coding | 16% |
| MM20T | CSNK1G1 | casein kinase 1, gamma 1                                                         | CCDS10192.2 | chr15_64496645-64496645_G_A   | 332P>S  | Substitution | Nonsynonymous coding | 28% |
| MM20T | CTBP2   | C-terminal binding protein 2                                                     | CCDS7644.1  | chr10_126715244-126715244_C_  | NA      | Deletion     | Frameshift           | 37% |
| MM20T | CTGF    | connective tissue growth factor                                                  | CCDS5151.1  | chr6_132271223-132271223_T_C  | 207S>G  | Substitution | Nonsynonymous coding | 18% |
| MM20T | CTR9    | Ctr9, Paf1/RNA polymerase II complex component, homolog ( <i>S. cerevisiae</i> ) | CCDS7805.1  | chr11_10800241-10800241_C_G   | 1037S>R | Substitution | Nonsynonymous coding | 13% |
| MM20T | CWF19L2 | CWF19-like 2, cell cycle control ( <i>S. pombe</i> )                             | CCDS8336.2  | chr11_107207442-107207442_A_  | NA      | Deletion     | Splice site acceptor | 45% |

|       |            |                                                         |                 |                               |         |              |                      |     |
|-------|------------|---------------------------------------------------------|-----------------|-------------------------------|---------|--------------|----------------------|-----|
| MM20T | CXorf22    | chromosome X open reading frame 22                      | CCDS14237.2     | chrX_35974093-35974093_A_G    | 397K>R  | Substitution | Nonsynonymous coding | 18% |
| MM20T | CXorf27    | chromosome X open reading frame 27                      | CCDS43929.1     | chrX_37850326-37850326_G_A    | 78M>I   | Substitution | Nonsynonymous coding | 17% |
| MM20T | CYP27B1    | cytochrome P450, family 27, subfamily B, polypeptide 1  | CCDS8954.1      | chr12_58160706-58160706_A_G   | 40I>T   | Substitution | Nonsynonymous coding | 17% |
| MM20T | CYP8B1     | cytochrome P450, family 8, subfamily B, polypeptide 1   | CCDS2707.1      | chr3_42916617-42916617_C_T    | 231R>Q  | Substitution | Nonsynonymous coding | 17% |
| MM20T | CYP8B1     | cytochrome P450, family 8, subfamily B, polypeptide 1   | CCDS2707.1      | chr3_42916798-42916798_G_A    | 171R>C  | Substitution | Nonsynonymous coding | 18% |
| MM20T | CYTH4      | cytohesin 4                                             | CCDS13946.1     | chr22_37692101-37692101_G_A   | 77A>T   | Substitution | Nonsynonymous coding | 25% |
| MM20T | DAPP1      | dual adaptor of phosphotyrosine and 3-phosphoinositides | CCDS47112.1     | chr4_100756888-100756889_CT_  | NA      | Deletion     | Frameshift           | 18% |
| MM20T | DCAF12L1   | DDB1 and CUL4 associated factor 12-like 1               | CCDS14610.1     | chrX_125685739-125685739_A_G  | 285Y>H  | Substitution | Nonsynonymous coding | 22% |
| MM20T | DCAF12L2   | DDB1 and CUL4 associated factor 12-like 2               | CCDS43991.1     | chrX_125299502-125299502_T_C  | 136M>V  | Substitution | Nonsynonymous coding | 13% |
| MM20T | DCC        | deleted in colorectal carcinoma                         | CCDS11952.1     | chr18_50734161-50734161_A_T   | 612D>V  | Substitution | Nonsynonymous coding | 17% |
| MM20T | DCHS1      | dachsous 1 (Drosophila)                                 | CCDS7771.1      | chr11_6646551-6646551_A_G     | 2342C>R | Substitution | Nonsynonymous coding | 17% |
| MM20T | DCHS1      | dachsous 1 (Drosophila)                                 | CCDS7771.1      | chr11_6651077-6651077_C_T     | 1621A>T | Substitution | Nonsynonymous coding | 27% |
| MM20T | DDIT4L     | DNA-damage-inducible transcript 4-like                  | CCDS34036.1     | chr4_101109048-101109048_C_A  | 123R>M  | Substitution | Nonsynonymous coding | 23% |
| MM20T | DDX20      | DEAD (Asp-Glu-Ala-Asp) box polypeptide 20               | CCDS842.1       | chr1_112305407-112305409_AAA_ | NA      | Deletion     | Splice site donor    | 14% |
| MM20T | DDX52      | DEAD (Asp-Glu-Ala-Asp) box polypeptide 52               | CCDS11323.1     | chr17_35988719-35988720_AA_   | NA      | Deletion     | Splice site acceptor | 17% |
| MM20T | DDX54      | DEAD (Asp-Glu-Ala-Asp) box polypeptide 54               | CCDS44984.1     | chr12_113612727-113612727_C_  | NA      | Deletion     | Frameshift           | 24% |
| MM20T | DDX54      | DEAD (Asp-Glu-Ala-Asp) box polypeptide 54               | CCDS44984.1     | chr12_113612558-113612558_G_A | 319R>W  | Substitution | Nonsynonymous coding | 12% |
| MM20T | DDX59      | DEAD (Asp-Glu-Ala-Asp) box polypeptide 59               | ENST00000447706 | chr1_200594042-200594042_T_   | NA      | Deletion     | Frameshift           | 15% |
| MM20T | DDX6       | DEAD (Asp-Glu-Ala-Asp) box helicase 6                   | CCDS44751.1     | chr11_118626216-118626217_AA_ | NA      | Deletion     | Splice site acceptor | 15% |
| MM20T | DDX6       | DEAD (Asp-Glu-Ala-Asp) box helicase 6                   | CCDS44751.1     | chr11_118626216-118626216_A_  | NA      | Deletion     | Splice site acceptor | 11% |
| MM20T | DEPDC5     | DEP domain containing 5                                 | CCDS46692.1     | chr22_32210991-32210991_C_T   | 487R>X  | Substitution | Nonsense             | 21% |
| MM20T | DEPDC5     | DEP domain containing 5                                 | CCDS46692.1     | chr22_32239185-32239185_C_T   | 865R>X  | Substitution | Nonsense             | 24% |
| MM20T | DGKI       | diacylglycerol kinase, iota                             | CCDS5845.1      | chr7_137237268-137237268_C_T  | 665R>Q  | Substitution | Nonsynonymous coding | 22% |
| MM20T | DHRS13     | dehydrogenase/reductase (SDR family) member 13          | CCDS11246.2     | chr17_27225544-27225544_T_C   | 350Y>C  | Substitution | Nonsynonymous coding | 19% |
| MM20T | DHX36      | DEAH (Asp-Glu-Ala-His) box polypeptide 36               | CCDS3171.1      | chr3_154022700-154022700_C_A  | 344D>Y  | Substitution | Nonsynonymous coding | 23% |
| MM20T | DHX36      | DEAH (Asp-Glu-Ala-His) box polypeptide 36               | CCDS3171.1      | chr3_154007619-154007619_A_   | NA      | Deletion     | Splice site acceptor | 18% |
| MM20T | DHX40      | DEAH (Asp-Glu-Ala-His) box polypeptide 40               | CCDS11617.1     | chr17_57663597-57663601_AAAA_ | NA      | Deletion     | Splice site donor    | 16% |
| MM20T | DHX40      | DEAH (Asp-Glu-Ala-His) box polypeptide 40               | CCDS11617.1     | chr17_57663597-57663600_AAAA_ | NA      | Deletion     | Splice site donor    | 16% |
| MM20T | DISP2      | dispatched homolog 2 (Drosophila)                       | CCDS10056.1     | chr15_40662412-40662412_G     | NA      | Insertion    | Frameshift           | 14% |
| MM20T | DLGAP1-AS1 | DLGAP1 antisense RNA 1                                  | ENST00000317114 | chr18_3597090-3597090_T_      | NA      | Deletion     | Frameshift           | 17% |
| MM20T | DMD        | dystrophin                                              | NM_004011       | chrX_32430297-32430297_A_     | NA      | Deletion     | Frameshift           | 16% |
| MM20T | DMD        | dystrophin                                              | CCDS14233.1     | chrX_31165492-31165492_C_T    | 3566R>H | Substitution | Nonsynonymous coding | 26% |



|       |         |                                                                   |             |                                |         |              |                      |     |
|-------|---------|-------------------------------------------------------------------|-------------|--------------------------------|---------|--------------|----------------------|-----|
| MM20T | DMD     | dystrophin                                                        | CCDS14233.1 | chrX_31792147-31792147_T_C     | 2491Q>R | Substitution | Nonsynonymous coding | 29% |
| MM20T | DMP1    | dentin matrix acidic phosphoprotein 1                             | CCDS3623.1  | chr4_88583243-88583243_G_A     | 105D>N  | Substitution | Nonsynonymous coding | 27% |
| MM20T | DMWD    | dystrophia myotonica, WD repeat containing                        | CCDS33054.1 | chr19_46289388-46289388_G_     | NA      | Deletion     | Frameshift           | 18% |
| MM20T | DNAH1   | dynein, axonemal, heavy chain 1                                   | CCDS46842.1 | chr3_52394337-52394337_A_G     | 1528T>A | Substitution | Nonsynonymous coding | 31% |
| MM20T | DNAH17  | dynein, axonemal, heavy chain 17                                  | NM_173628   | chr17_76488772-76488772_C_T    | 2162V>I | Substitution | Nonsynonymous coding | 16% |
| MM20T | DNAH17  | dynein, axonemal, heavy chain 17                                  | NM_173628   | chr17_76566457-76566457_G_     | NA      | Deletion     | Splice site acceptor | 32% |
| MM20T | DNAH5   | dynein, axonemal, heavy chain 5                                   | CCDS3882.1  | chr5_13859681-13859681_T_      | NA      | Deletion     | Frameshift           | 13% |
| MM20T | DNAH7   | dynein, axonemal, heavy chain 7                                   | CCDS42794.1 | chr2_196642621-196642621_C_T   | 3656R>H | Substitution | Nonsynonymous coding | 15% |
| MM20T | DNAH7   | dynein, axonemal, heavy chain 7                                   | CCDS42794.1 | chr2_196762492-196762495_AAAA_ | NA      | Deletion     | Splice site acceptor | 30% |
| MM20T | DNAH7   | dynein, axonemal, heavy chain 7                                   | CCDS42794.1 | chr2_196762492-196762494_AAA_  | NA      | Deletion     | Splice site acceptor | 24% |
| MM20T | DNAJA3  | DnaJ (Hsp40) homolog, subfamily A, member 3                       | CCDS10515.1 | chr16_4476004-4476004_G_A      | 41R>H   | Substitution | Nonsynonymous coding | 30% |
| MM20T | DNAJC13 | DnaJ (Hsp40) homolog, subfamily C, member 13                      | CCDS33857.1 | chr3_132196911-132196913_TTG_  | 879IV>I | Deletion     | In-frame deletion    | 22% |
| MM20T | DNAJC13 | DnaJ (Hsp40) homolog, subfamily C, member 13                      | CCDS33857.1 | chr3_132173005-132173006_TT_   | NA      | Deletion     | Splice site donor    | 10% |
| MM20T | DNAJC24 | DnaJ (Hsp40) homolog, subfamily C, member 24                      | CCDS7873.2  | chr11_31392367-31392367_A_G    | 24I>M   | Substitution | Nonsynonymous coding | 35% |
| MM20T | DOCK3   | dedicator of cytokinesis 3                                        | CCDS46835.1 | chr3_51417604-51417604_C_      | NA      | Deletion     | Frameshift           | 43% |
| MM20T | DOPEY1  | dopey family member 1                                             | CCDS4996.1  | chr6_83872506-83872506_T_C     | NA      | Substitution | Splice site acceptor | 22% |
| MM20T | DPP4    | dipeptidyl-peptidase 4                                            | CCDS2216.1  | chr2_162868459-162868459_A_G   | 559F>S  | Substitution | Nonsynonymous coding | 17% |
| MM20T | DPP9    | dipeptidyl-peptidase 9                                            | CCDS45928.1 | chr19_4689583-4689583_T_C      | 583Q>R  | Substitution | Nonsynonymous coding | 29% |
| MM20T | DPYD    | dihydropyrimidine dehydrogenase                                   | CCDS30777.1 | chr1_98164970-98164970_A_      | NA      | Deletion     | Frameshift           | 26% |
| MM20T | DPYSL4  | dihydropyrimidinase-like 4                                        | CCDS7665.1  | chr10_134012438-134012438_G_   | NA      | Deletion     | Frameshift           | 16% |
| MM20T | DPYSL5  | dihydropyrimidinase-like 5                                        | CCDS1730.1  | chr2_27151156-27151156_G_T     | 212G>C  | Substitution | Nonsynonymous coding | 17% |
| MM20T | DUS1L   | dihydrouridine synthase 1-like (S. cerevisiae)                    | CCDS32775.1 | chr17_80018776-80018776_C_T    | 302A>T  | Substitution | Nonsynonymous coding | 21% |
| MM20T | DVL1    | dishevelled, dsh homolog 1 (Drosophila)                           | CCDS22.1    | chr1_1271642-1271642_C_        | NA      | Deletion     | Frameshift           | 42% |
| MM20T | DYNC1L1 | dynein, cytoplasmic 1, light intermediate chain 1                 | CCDS2654.1  | chr3_32571824-32571827_AAAA_   | NA      | Deletion     | Splice site acceptor | 13% |
| MM20T | DYNC1L1 | dynein, cytoplasmic 1, light intermediate chain 1                 | CCDS2654.1  | chr3_32571824-32571828_AAAAA_  | NA      | Deletion     | Splice site acceptor | 15% |
| MM20T | DYNC1L1 | dynein, cytoplasmic 1, light intermediate chain 1                 | CCDS2654.1  | chr3_32571824-32571826_AAA_    | NA      | Deletion     | Splice site acceptor | 10% |
| MM20T | DYRK1A  | dual-specificity tyrosine-(Y)-phosphorylation regulated kinase 1A | CCDS42925.1 | chr21_38853059-38853059_A_     | NA      | Deletion     | Frameshift           | 15% |
| MM20T | ECD     | ecdysoneless homolog (Drosophila)                                 | CCDS44434.1 | chr10_74906123-74906125_AAA_   | NA      | Deletion     | Splice site acceptor | 24% |
| MM20T | ECD     | ecdysoneless homolog (Drosophila)                                 | CCDS44434.1 | chr10_74906123-74906124_AA_    | NA      | Deletion     | Splice site acceptor | 19% |
| MM20T | ECEL1   | endothelin converting enzyme-like 1                               | CCDS2493.1  | chr2_233345526-233345526_G_    | NA      | Deletion     | Splice site acceptor | 14% |
| MM20T | ECEL1   | endothelin converting enzyme-like 1                               | CCDS2493.1  | chr2_233348910-233348910_C_T   | 403W>X  | Substitution | Nonsense             | 26% |
| MM20T | EDEM1   | ER degradation enhancer, mannosidase alpha-like 1                 | CCDS33686.1 | chr3_5255154-5255154_T_G       | 611S>A  | Substitution | Nonsynonymous coding | 11% |

|       |                 |                                                                               |             |                                |         |              |                      |     |
|-------|-----------------|-------------------------------------------------------------------------------|-------------|--------------------------------|---------|--------------|----------------------|-----|
| MM20T | EFHC2           | EF-hand domain (C-terminal) containing 2                                      | NM_025184   | chrX_44094660-44094660_A_      | NA      | Deletion     | Frameshift           | 23% |
| MM20T | EHBP1L1         | EH domain binding protein 1-like 1                                            | CCDS44649.1 | chr11_65352958-65352958_G_A    | 1277V>M | Substitution | Nonsynonymous coding | 20% |
| MM20T | EIF2AK1         | eukaryotic translation initiation factor 2-alpha kinase 1                     | CCDS5345.1  | chr7_6080854-6080855_AA_       | NA      | Deletion     | Splice site acceptor | 36% |
| MM20T | EIF3B           | eukaryotic translation initiation factor 3, subunit B                         | CCDS5332.1  | chr7_2403394-2403394_C_T       | 333A>V  | Substitution | Nonsynonymous coding | 26% |
| MM20T | EIF4E           | eukaryotic translation initiation factor 4E                                   | CCDS47109.1 | chr4_99806216-99806216_A_      | NA      | Deletion     | Splice site acceptor | 30% |
| MM20T | EIF4E1B         | eukaryotic translation initiation factor 4E family member 1B                  | CCDS47345.1 | chr5_176072209-176072209_C_T   | 147R>C  | Substitution | Nonsynonymous coding | 34% |
| MM20T | EIF4G3          | eukaryotic translation initiation factor 4 gamma, 3                           | CCDS214.1   | chr1_21306905-21306905_G_      | NA      | Deletion     | Frameshift           | 30% |
| MM20T | ELL             | elongation factor RNA polymerase II                                           | CCDS12380.1 | chr19_18576653-18576653_C_T    | 87D>N   | Substitution | Nonsynonymous coding | 11% |
| MM20T | ELTD1           | EGF, latrophilin and seven transmembrane domain containing 1                  | CCDS41352.1 | chr1_79470850-79470850_G_T     | 26P>H   | Substitution | Nonsynonymous coding | 25% |
| MM20T | EMID1           | EMI domain containing 1                                                       | CCDS33630.1 | chr22_29628274-29628274_C_T    | 236R>W  | Substitution | Nonsynonymous coding | 18% |
| MM20T | EML5            | echinoderm microtubule associated protein like 5                              | CCDS45148.1 | chr14_89091318-89091318_T_A    | 1632R>W | Substitution | Nonsynonymous coding | 12% |
| MM20T | ENGASE          | endo-beta-N-acetylglucosaminidase                                             | CCDS42394.1 | chr17_77077058-77077058_C_A    | 259L>M  | Substitution | Nonsynonymous coding | 16% |
| MM20T | ENKD1           | enkurin domain containing 1                                                   | CCDS10844.1 | chr16_67697663-67697663_G_     | NA      | Deletion     | Frameshift           | 14% |
| MM20T | ENSG00000105663 | -                                                                             | CCDS46055.1 | chr19_36213914-36213914_G_A    | 914E>K  | Substitution | Nonsynonymous coding | 42% |
| MM20T | ENSG00000115128 | -                                                                             | CCDS1707.1  | chr2_24290692-24290694_CTT_    | 106K>-  | Deletion     | In-frame deletion    | 26% |
| MM20T | ENSG00000141140 | -                                                                             | CCDS45654.1 | chr17_34871019-34871019_G_A    | 185A>V  | Substitution | Nonsynonymous coding | 22% |
| MM20T | ENSG00000163075 | -                                                                             | CCDS33282.1 | chr2_120404630-120404632_TTT_  | NA      | Deletion     | Splice site donor    | 39% |
| MM20T | ENSG00000163075 | -                                                                             | CCDS33282.1 | chr2_120404630-120404633_TTTT_ | NA      | Deletion     | Splice site donor    | 28% |
| MM20T | EPC1            | enhancer of polycomb homolog 1 (Drosophila)                                   | CCDS7172.1  | chr10_32575774-32575774_A_     | NA      | Deletion     | Splice site acceptor | 38% |
| MM20T | EPHA7           | EPH receptor A7                                                               | CCDS5031.1  | chr6_93979204-93979204_T_      | NA      | Deletion     | Frameshift           | 11% |
| MM20T | EPS8            | epidermal growth factor receptor pathway substrate 8                          | CCDS31753.1 | chr12_15776224-15776225_AA_    | NA      | Deletion     | Splice site acceptor | 18% |
| MM20T | ERBB2           | v-erb-b2 erythroblastic leukemia viral oncogene homolog 2, neuro/glioblastoma | CCDS32642.1 | chr17_37881332-37881332_G_A    | 842V>I  | Substitution | Nonsynonymous coding | 26% |
| MM20T | ERF             | Ets2 repressor factor                                                         | CCDS12600.1 | chr19_42752695-42752695_C_     | NA      | Deletion     | Frameshift           | 12% |
| MM20T | ERF             | Ets2 repressor factor                                                         | CCDS12600.1 | chr19_42754077-42754077_C_T    | 92R>H   | Substitution | Nonsynonymous coding | 27% |
| MM20T | ERMP1           | endoplasmic reticulum metalloproteinase 1                                     | CCDS34983.1 | chr9_5799012-5799012_A_        | NA      | Deletion     | Splice site acceptor | 22% |
| MM20T | ERO1L           | ERO1-like (S. cerevisiae)                                                     | CCDS9709.1  | chr14_53145194-53145194_A_     | NA      | Deletion     | Splice site acceptor | 26% |
| MM20T | ESRP1           | epithelial splicing regulatory protein 1                                      | CCDS47897.1 | chr8_95686611-95686611_A_      | NA      | Deletion     | Frameshift           | 24% |
| MM20T | EVPL            | envoplakin                                                                    | CCDS11737.1 | chr17_74014669-74014669_G_A    | 433Q>X  | Substitution | Nonsense             | 38% |
| MM20T | FAM115A         | family with sequence similarity 115, member A                                 | CCDS5886.1  | chr7_143573481-143573481_G_A   | 74T>M   | Substitution | Nonsynonymous coding | 24% |
| MM20T | FAM189A2        | family with sequence similarity 189, member A2                                | CCDS6629.1  | chr9_71998632-71998632_C_A     | 194P>Q  | Substitution | Nonsynonymous coding | 16% |
| MM20T | FAM208B         | family with sequence similarity 208, member B                                 | CCDS41485.1 | chr10_5769050-5769050_C_T      | 151H>Y  | Substitution | Nonsynonymous coding | 14% |
| MM20T | FAM212A         | family with sequence similarity 212, member A                                 | CCDS2804.1  | chr3_49842211-49842211_C_T     | 219R>C  | Substitution | Nonsynonymous coding | 18% |

|       |         |                                                             |              |                              |         |              |                      |     |
|-------|---------|-------------------------------------------------------------|--------------|------------------------------|---------|--------------|----------------------|-----|
| MM20T | FAM57B  | family with sequence similarity 57, member B                | CCDS10667.2  | chr16_30041821-30041821_C_   | NA      | Deletion     | Frameshift           | 31% |
| MM20T | FAM65A  | family with sequence similarity 65, member A                | CCDS10840.1  | chr16_67579303-67579303_C_T  | 1019A>V | Substitution | Nonsynonymous coding | 36% |
| MM20T | FAM84B  | family with sequence similarity 84, member B                | CCDS6358.1   | chr8_127568748-127568748_G_  | NA      | Deletion     | Frameshift           | 13% |
| MM20T | FBLN1   | fibulin 1                                                   | CCDS14067.1  | chr22_45939287-45939287_A_G  | 401N>S  | Substitution | Nonsynonymous coding | 14% |
| MM20T | FBP1    | fructose-1,6-bisphosphatase 1                               | CCDS6712.1   | chr9_97369188-97369188_T_    | NA      | Deletion     | Frameshift           | 26% |
| MM20T | FBXL21  | F-box and leucine-rich repeat protein 21 (gene/pseudogene)  | NM_012159    | chr5_135276353-135276353_G_T | NA      | Substitution | Splice site donor    | 26% |
| MM20T | FBXL3   | F-box and leucine-rich repeat protein 3                     | CCDS9457.1   | chr13_77581683-77581683_A_   | NA      | Deletion     | Frameshift           | 14% |
| MM20T | FBXO24  | F-box protein 24                                            | CCDS5698.1   | chr7_100198291-100198291_G_  | NA      | Deletion     | Frameshift           | 19% |
| MM20T | FCGBP   | Fc fragment of IgG binding protein                          | CCDS12546.1  | chr19_40363128-40363128_C_T  | 4981R>Q | Substitution | Nonsynonymous coding | 19% |
| MM20T | FETUB   | fetuin B                                                    | CCDS3279.1   | chr3_186362544-186362544_A_  | NA      | Deletion     | Frameshift           | 14% |
| MM20T | FGF10   | fibroblast growth factor 10                                 | CCDS3950.1   | chr5_44388586-44388586_C_T   | 67V>M   | Substitution | Nonsynonymous coding | 19% |
| MM20T | FLNA    | filamin A, alpha                                            | CCDS48194.1  | chrX_153583429-153583429_C_A | 1661G>C | Substitution | Nonsynonymous coding | 15% |
| MM20T | FLNA    | filamin A, alpha                                            | CCDS48194.1  | chrX_153588601-153588601_C_T | 1188A>T | Substitution | Nonsynonymous coding | 26% |
| MM20T | FLT4    | fms-related tyrosine kinase 4                               | CCDS4457.1   | chr5_180048116-180048116_C_A | 719E>D  | Substitution | Nonsynonymous coding | 14% |
| MM20T | FMR1    | fragile X mental retardation 1                              | CCDS14682.1  | chrX_147019049-147019049_A_  | NA      | Insertion    | Frameshift           | 20% |
| MM20T | FNBP1   | formin binding protein 1                                    | CCDS48040.1  | chr9_132687243-132687243_T_  | NA      | Deletion     | Frameshift           | 16% |
| MM20T | FNDC1   | fibronectin type III domain containing 1                    | CCDS47512.1  | chr6_159654416-159654416_G_A | 958A>T  | Substitution | Nonsynonymous coding | 19% |
| MM20T | FNDC4   | fibronectin type III domain containing 4                    | CCDS1756.1   | chr2_27717517-27717517_G_    | NA      | Deletion     | Frameshift           | 27% |
| MM20T | FNDC5   | fibronectin type III domain containing 5                    | CCDS369.1    | chr1_33330280-33330280_C_    | NA      | Deletion     | Frameshift           | 21% |
| MM20T | FOCAD   | focadhesin                                                  | CCDS34993.1  | chr9_20789411-20789411_G_T   | 420R>M  | Substitution | Nonsynonymous coding | 20% |
| MM20T | FPR2    | formyl peptide receptor 2                                   | CCDS12840.1  | chr19_52272510-52272510_C_T  | 200A>V  | Substitution | Nonsynonymous coding | 22% |
| MM20T | FREM1   | FRAS1 related extracellular matrix 1                        | CCDS47952.1  | chr9_14769869-14769869_A_    | NA      | Deletion     | Splice site acceptor | 21% |
| MM20T | FREM3   | FRAS1 related extracellular matrix 3                        | NM_001168235 | chr4_144614358-144614358_A_  | NA      | Deletion     | Splice site acceptor | 17% |
| MM20T | FRYL    | FRY-like                                                    | CCDS43227.1  | chr4_48596037-48596039_AAA_  | NA      | Deletion     | Splice site acceptor | 22% |
| MM20T | FBP1    | ferritin, heavy polypeptide 1                               | CCDS41655.1  | chr11_61732367-61732367_C_T  | ISV-4>  | Substitution | Splice site acceptor | 22% |
| MM20T | FTL     | ferritin, light polypeptide                                 | CCDS33070.1  | chr19_49469039-49469039_G_T  | 39D>Y   | Substitution | Nonsynonymous coding | 18% |
| MM20T | GAB3    | GRB2-associated binding protein 3                           | CCDS48198.1  | chrX_153940894-153940894_G_T | 227L>M  | Substitution | Nonsynonymous coding | 29% |
| MM20T | GABRA5  | gamma-aminobutyric acid (GABA) A receptor, alpha 5          | CCDS45194.1  | chr15_27193285-27193285_G_A  | 432V>I  | Substitution | Nonsynonymous coding | 11% |
| MM20T | GALNT14 | UDP-N-acetyl-alpha-D-galactosamine:polypeptide N-           | CCDS1773.2   | chr2_31178796-31178796_G_A   | 172R>C  | Substitution | Nonsynonymous coding | 19% |
| MM20T | GALNT15 | UDP-N-acetyl-alpha-D-galactosamine:polypeptide N-           | CCDS33711.1  | chr3_16252734-16252734_G_A   | 395E>K  | Substitution | Nonsynonymous coding | 27% |
| MM20T | GCH1    | GTP cyclohydrolase 1                                        | CCDS9720.1   | chr14_55326411-55326411_C_T  | 166S>N  | Substitution | Nonsynonymous coding | 16% |
| MM20T | GDPD4   | glycerophosphodiester phosphodiesterase domain containing 4 | CCDS8249.1   | chr11_76990448-76990448_A_   | NA      | Deletion     | Splice site acceptor | 23% |

|       |          |                                                                |              |                               |         |              |                      |     |
|-------|----------|----------------------------------------------------------------|--------------|-------------------------------|---------|--------------|----------------------|-----|
| MM20T | GGPS1    | geranylgeranyl diphosphate synthase 1                          | CCDS1604.1   | chr1_235505654-235505654_G_A  | 157G>E  | Substitution | Nonsynonymous coding | 19% |
| MM20T | GIPC1    | GIPC PDZ domain containing family, member 1                    | CCDS12310.1  | chr19_14593695-14593695_G_A   | 32P>S   | Substitution | Nonsynonymous coding | 27% |
| MM20T | GIT1     | G protein-coupled receptor kinase interacting ArfGAP 1         | CCDS42290.1  | chr17_27903264-27903264_T_C   | 538T>A  | Substitution | Nonsynonymous coding | 16% |
| MM20T | GLTSCR1  | glioma tumor suppressor candidate region gene 1                | CCDS46134.1  | chr19_48197891-48197891_C_    | NA      | Deletion     | Frameshift           | 23% |
| MM20T | GOT1L1   | glutamic-oxaloacetic transaminase 1-like 1                     | CCDS47839.1  | chr8_37791834-37791834_T_     | NA      | Deletion     | Frameshift           | 14% |
| MM20T | GPBAR1   | G protein-coupled bile acid receptor 1                         | CCDS46515.1  | chr2_219127452-219127452_C_T  | 2T>M    | Substitution | Nonsynonymous coding | 26% |
| MM20T | GPR112   | G protein-coupled receptor 112                                 | CCDS35409.1  | chrX_135429329-135429329_C_A  | 1155P>H | Substitution | Nonsynonymous coding | 16% |
| MM20T | GPR21    | G protein-coupled receptor 21                                  | CCDS6849.1   | chr9_125797330-125797330_T_C  | 162L>P  | Substitution | Nonsynonymous coding | 17% |
| MM20T | GPR52    | G protein-coupled receptor 52                                  | CCDS30941.1  | chr1_174417788-174417788_G_   | NA      | Deletion     | Frameshift           | 18% |
| MM20T | GPRIN1   | G protein regulated inducer of neurite outgrowth 1             | CCDS4405.1   | chr5_176025286-176025286_C_   | NA      | Deletion     | Frameshift           | 19% |
| MM20T | GRB10    | growth factor receptor-bound protein 10                        | CCDS43582.1  | chr7_50680482-50680482_C_T    | 384E>K  | Substitution | Nonsynonymous coding | 20% |
| MM20T | GRIA1    | glutamate receptor, ionotropic, AMPA 1                         | CCDS4322.1   | chr5_153085435-153085435_T_   | NA      | Deletion     | Frameshift           | 16% |
| MM20T | GRIA4    | glutamate receptor, ionotropic, AMPA 4                         | CCDS8333.1   | chr11_105845100-105845100__T  | NA      | Insertion    | Frameshift           | 23% |
| MM20T | GRIN3A   | glutamate receptor, ionotropic, N-methyl-D-aspartate 3A        | CCDS6758.1   | chr9_104499850-104499850_C_T  | 138V>M  | Substitution | Nonsynonymous coding | 16% |
| MM20T | GRM8     | glutamate receptor, metabotropic 8                             | CCDS47696.1  | chr7_126249501-126249501_C_T  | 470R>H  | Substitution | Nonsynonymous coding | 23% |
| MM20T | GSE1     | Gse1 coiled-coil protein                                       | CCDS10952.1  | chr16_85682290-85682290_C_    | NA      | Deletion     | Frameshift           | 23% |
| MM20T | GSE1     | Gse1 coiled-coil protein                                       | CCDS10952.1  | chr16_85688456-85688456_T_C   | 219L>P  | Substitution | Nonsynonymous coding | 19% |
| MM20T | HACL1    | 2-hydroxyacyl-CoA lyase 1                                      | CCDS2627.1   | chr3_15613280-15613282_AAA_   | NA      | Deletion     | Splice site acceptor | 18% |
| MM20T | HDFGF    | hepatoma-derived growth factor                                 | CCDS44247.1  | chr1_156715104-156715104_A_   | NA      | Deletion     | Frameshift           | 16% |
| MM20T | HID1     | HID1 domain containing                                         | CCDS32726.1  | chr17_72958016-72958016_C_T   | 227S>N  | Substitution | Nonsynonymous coding | 17% |
| MM20T | HIVEP3   | human immunodeficiency virus type 1 enhancer binding protein 3 | CCDS463.1    | chr1_42047173-42047173_G_A    | 1099P>L | Substitution | Nonsynonymous coding | 17% |
| MM20T | HOMER3   | homer homolog 3 (Drosophila)                                   | CCDS12391.1  | chr19_19040274-19040274_C_T   | 355R>H  | Substitution | Nonsynonymous coding | 34% |
| MM20T | HOXD9    | homeobox D9                                                    | CCDS2267.2   | chr2_176988159-176988159_G_   | NA      | Deletion     | Frameshift           | 12% |
| MM20T | HPSE2    | heparanase 2                                                   | NM_001166246 | chr10_100221578-100221578_T_C | NA      | Substitution | Splice site acceptor | 12% |
| MM20T | HSD17B13 | hydroxysteroid (17-beta) dehydrogenase 13                      | CCDS3618.1   | chr4_88239587-88239587_C_T    | 71R>H   | Substitution | Nonsynonymous coding | 52% |
| MM20T | HSF1     | heat shock transcription factor 1                              | CCDS6419.1   | chr8_145537812-145537812_C_T  | 470A>V  | Substitution | Nonsynonymous coding | 23% |
| MM20T | HSPH1    | heat shock 105kDa/110kDa protein 1                             | CCDS9340.1   | chr13_31722621-31722624_AAAA_ | NA      | Deletion     | Splice site acceptor | 19% |
| MM20T | HTR1B    | 5-hydroxytryptamine (serotonin) receptor 1B, G protein-coupled | CCDS4986.1   | chr6_78172811-78172811_G_A    | 104P>S  | Substitution | Nonsynonymous coding | 26% |
| MM20T | IBA57    | IBA57, iron-sulfur cluster assembly homolog (S. cerevisiae)    | CCDS31046.1  | chr1_228362942-228362942_G_A  | 267A>T  | Substitution | Nonsynonymous coding | 20% |
| MM20T | ICA1     | islet cell autoantigen 1, 69kDa                                | CCDS34602.1  | chr7_8198251-8198251_T_       | NA      | Deletion     | Frameshift           | 18% |
| MM20T | ICK      | intestinal cell (MAK-like) kinase                              | CCDS4949.1   | chr6_52897418-52897418_T_C    | 64K>R   | Substitution | Nonsynonymous coding | 14% |
| MM20T | IDH2     | isocitrate dehydrogenase 2 (NADP+), mitochondrial              | CCDS10359.1  | chr15_90631918-90631918__C    | NA      | Insertion    | Frameshift           | 17% |

|       |          |                                                                          |                 |                                |          |              |                      |     |
|-------|----------|--------------------------------------------------------------------------|-----------------|--------------------------------|----------|--------------|----------------------|-----|
| MM20T | IFT27    | intraflagellar transport 27 homolog (Chlamydomonas)                      | CCDS13932.1     | chr22_37159027-37159027_G_A    | 127A>V   | Substitution | Nonsynonymous coding | 16% |
| MM20T | IGDCC4   | immunoglobulin superfamily, DCC subclass, member 4                       | CCDS10206.1     | chr15_65703598-65703598_C_     | NA       | Deletion     | Frameshift           | 21% |
| MM20T | IGF2BP3  | insulin-like growth factor 2 mRNA binding protein 3                      | CCDS5382.1      | chr7_23458424-23458424_G_A     | 86R>X    | Substitution | Nonsense             | 12% |
| MM20T | IGLON5   | IgLON family member 5                                                    | CCDS46158.1     | chr19_51825363-51825364_AC_    | NA       | Deletion     | Frameshift           | 22% |
| MM20T | IGLV2-33 | immunoglobulin lambda variable 2-33 (non-functional)                     | ENST00000390302 | chr22_22930974-22930974_T_C    | 57Y>H    | Substitution | Nonsynonymous coding | 20% |
| MM20T | ILVBL    | ilvB (bacterial acetolactate synthase)-like                              | CCDS12325.1     | chr19_15227233-15227235_CTT_   | 429K>-   | Deletion     | In-frame deletion    | 13% |
| MM20T | INF2     | inverted formin, FH2 and WH2 domain containing                           | CCDS9989.2      | chr14_105169514-105169514_C_T  | 155P>L   | Substitution | Nonsynonymous coding | 18% |
| MM20T | INHBE    | inhibin, beta E                                                          | CCDS8939.1      | chr12_57850546-57850546_T_C    | 323L>P   | Substitution | Nonsynonymous coding | 17% |
| MM20T | INO80B   | INO80 complex subunit B                                                  | CCDS1942.2      | chr2_74683263-74683263_G_A     | 135R>Q   | Substitution | Nonsynonymous coding | 29% |
| MM20T | INPL1    | inositol polyphosphate phosphatase-like 1                                | CCDS8213.1      | chr11_71948209-71948209_C_     | NA       | Deletion     | Frameshift           | 28% |
| MM20T | INPL1    | inositol polyphosphate phosphatase-like 1                                | CCDS8213.1      | chr11_71948748-71948748_C_     | NA       | Deletion     | Frameshift           | 33% |
| MM20T | IRGC     | immunity-related GTPase family, cinema                                   | CCDS12629.1     | chr19_44223162-44223162_G_A    | 151R>H   | Substitution | Nonsynonymous coding | 24% |
| MM20T | ISOC1    | isochorismatase domain containing 1                                      | CCDS43357.1     | chr5_128448648-128448651_TAAT_ | NA       | Deletion     | Frameshift           | 31% |
| MM20T | ITGA10   | integrin, alpha 10                                                       | CCDS918.1       | chr1_145527998-145527998_G_    | NA       | Deletion     | Frameshift           | 26% |
| MM20T | ITIH1    | inter-alpha-trypsin inhibitor heavy chain 1                              | CCDS2864.1      | chr3_52817257-52817257_G_A     | 376R>Q   | Substitution | Nonsynonymous coding | 29% |
| MM20T | ITPR2    | inositol 1,4,5-trisphosphate receptor, type 2                            | CCDS41764.1     | chr12_26732997-26732999_AAG_   | 1490FF>F | Deletion     | In-frame deletion    | 26% |
| MM20T | ITSN1    | intersectin 1 (SH3 domain protein)                                       | CCDS33545.1     | chr21_35206620-35206620_A_     | NA       | Deletion     | Frameshift           | 18% |
| MM20T | IWS1     | IWS1 homolog (S. cerevisiae)                                             | CCDS2146.1      | chr2_128281262-128281262_C_T   | 47R>H    | Substitution | Nonsynonymous coding | 15% |
| MM20T | JARID2   | jumonji, AT rich interactive domain 2                                    | CCDS4533.1      | chr6_15501170-15501170_C_T     | 660R>W   | Substitution | Nonsynonymous coding | 18% |
| MM20T | JPH4     | junctophilin 4                                                           | CCDS9603.1      | chr14_24040436-24040436_C_     | NA       | Deletion     | Frameshift           | 22% |
| MM20T | KATNAL1  | katanin p60 subunit A-like 1                                             | CCDS31956.1     | chr13_30854364-30854365_AA_    | NA       | Deletion     | Splice site acceptor | 24% |
| MM20T | KCNAB3   | potassium voltage-gated channel, shaker-related subfamily, beta member 3 | CCDS11124.1     | chr17_7832617-7832617_C_       | NA       | Deletion     | Frameshift           | 16% |
| MM20T | KCNC2    | potassium voltage-gated channel, Shaw-related subfamily, member 2        | CCDS9007.1      | chr12_75444454-75444454_T_C    | 444Y>C   | Substitution | Nonsynonymous coding | 18% |
| MM20T | KCNF1    | potassium voltage-gated channel, subfamily F, member 1                   | CCDS1676.1      | chr2_11053030-11053030_C_T     | 160R>C   | Substitution | Nonsynonymous coding | 29% |
| MM20T | KCNG2    | potassium voltage-gated channel, subfamily G, member 2                   | CCDS12019.1     | chr18_77623915-77623915_C_T    | 83A>V    | Substitution | Nonsynonymous coding | 25% |
| MM20T | KCTD11   | potassium channel tetramerisation domain containing 11                   | CCDS32545.1     | chr17_7256952-7256952_C_T      | 231R>W   | Substitution | Nonsynonymous coding | 17% |
| MM20T | KCTD20   | potassium channel tetramerisation domain containing 20                   | CCDS4821.1      | chr6_36452604-36452607_AAAA_   | NA       | Deletion     | Splice site donor    | 13% |
| MM20T | KCTD20   | potassium channel tetramerisation domain containing 20                   | CCDS4821.1      | chr6_36452604-36452606_AAA_    | NA       | Deletion     | Splice site donor    | 28% |
| MM20T | KIAA0586 | KIAA0586                                                                 | CCDS45115.1     | chr14_58932598-58932598_C_T    | 626T>I   | Substitution | Nonsynonymous coding | 18% |
| MM20T | KIAA1143 | KIAA1143                                                                 | CCDS2721.1      | chr3_44794938-44794940_CTT_    | 120K>-   | Deletion     | In-frame deletion    | 32% |
| MM20T | KIAA1147 | KIAA1147                                                                 | CCDS47726.1     | chr7_141385275-141385275_T_C   | NA       | Substitution | Splice site donor    | 25% |
| MM20T | KIAA1609 | KIAA1609                                                                 | CCDS32498.1     | chr16_84520534-84520534_G_T    | 221L>M   | Substitution | Nonsynonymous coding | 25% |

|       |          |                                                               |                 |                               |         |              |                      |     |
|-------|----------|---------------------------------------------------------------|-----------------|-------------------------------|---------|--------------|----------------------|-----|
| MM20T | KIAA1614 | KIAA1614                                                      | CCDS41442.1     | chr1_180904705-180904705_C_   | NA      | Deletion     | Frameshift           | 13% |
| MM20T | KIF20B   | kinesin family member 20B                                     | CCDS7407.1      | chr10_91483748-91483748_A_    | NA      | Deletion     | Frameshift           | 16% |
| MM20T | KIF21A   | kinesin family member 21A                                     | CCDS1773.1      | chr12_39735929-39735929_A_    | NA      | Deletion     | Splice site acceptor | 24% |
| MM20T | KIF3A    | kinesin family member 3A                                      | CCDS34235.1     | chr5_132056409-132056409_A_   | NA      | Deletion     | Splice site acceptor | 39% |
| MM20T | KIF3C    | kinesin family member 3C                                      | CCDS1719.1      | chr2_26203255-26203255_G_A    | 511A>V  | Substitution | Nonsynonymous coding | 17% |
| MM20T | KIF3C    | kinesin family member 3C                                      | CCDS1719.1      | chr2_26204545-26204545_A_G    | 81L>P   | Substitution | Nonsynonymous coding | 26% |
| MM20T | KIF5B    | kinesin family member 5B                                      | CCDS7171.1      | chr10_32328262-32328262_T_C   | 129H>R  | Substitution | Nonsynonymous coding | 41% |
| MM20T | KIFAP3   | kinesin-associated protein 3                                  | CCDS1288.1      | chr1_169947294-169947294_T_C  | 610Q>R  | Substitution | Nonsynonymous coding | 30% |
| MM20T | KIT      | v-kit Hardy-Zuckerman 4 feline sarcoma viral oncogene homolog | CCDS3496.1      | chr4_55570018-55570018_T_     | NA      | Deletion     | Frameshift           | 29% |
| MM20T | KLF3     | Kruppel-like factor 3 (basic)                                 | CCDS3444.1      | chr4_38690460-38690460_A_     | NA      | Deletion     | Frameshift           | 23% |
| MM20T | KLHL1    | kelch-like family member 1                                    | CCDS9445.1      | chr13_70413176-70413176_G_A   | 449P>L  | Substitution | Nonsynonymous coding | 19% |
| MM20T | KLHL13   | kelch-like family member 13                                   | CCDS14571.1     | chrX_117032944-117032944_C_T  | 632C>Y  | Substitution | Nonsynonymous coding | 22% |
| MM20T | KLHL22   | kelch-like family member 22                                   | CCDS13779.1     | chr22_20779876-20779876_G_A   | 801P>L  | Substitution | Nonsynonymous coding | 24% |
| MM20T | KRT15    | keratin 15                                                    | CCDS11398.1     | chr17_39675025-39675025_G_A   | 19R>X   | Substitution | Nonsense             | 27% |
| MM20T | KRT2     | keratin 2                                                     | CCDS8835.1      | chr12_53038823-53038823_C_T   | 634V>M  | Substitution | Nonsynonymous coding | 33% |
| MM20T | KRT74    | keratin 74                                                    | CCDS8832.1      | chr12_52960820-52960820_C_    | NA      | Deletion     | Frameshift           | 31% |
| MM20T | KSR1     | kinase suppressor of ras 1                                    | NM_014238       | chr17_25910016-25910016_C_    | NA      | Deletion     | Frameshift           | 27% |
| MM20T | KSR2     | kinase suppressor of ras 2                                    | NM_173598       | chr12_118198984-118198984_G_A | 244P>L  | Substitution | Nonsynonymous coding | 20% |
| MM20T | LAMB4    | laminin, beta 4                                               | CCDS34732.1     | chr7_107743599-107743599_C_   | NA      | Deletion     | Frameshift           | 23% |
| MM20T | LAMB4    | laminin, beta 4                                               | CCDS34732.1     | chr7_107704383-107704383_T_A  | 962I>F  | Substitution | Nonsynonymous coding | 13% |
| MM20T | LARGE    | like-glycosyltransferase                                      | CCDS13912.1     | chr22_33828153-33828153_T_C   | 296N>D  | Substitution | Nonsynonymous coding | 27% |
| MM20T | LARP1B   | La ribonucleoprotein domain family, member 1B                 | CCDS3738.1      | chr4_129028387-129028387_C_T  | 303R>C  | Substitution | Nonsynonymous coding | 22% |
| MM20T | LENG8    | leukocyte receptor cluster (LRC) member 8                     | ENST00000421200 | chr19_54972616-54972616_G_T   | 106W>C  | Substitution | Nonsynonymous coding | 37% |
| MM20T | LEP      | leptin                                                        | CCDS5800.1      | chr7_127894705-127894705_G_   | NA      | Deletion     | Frameshift           | 16% |
| MM20T | LGALS12  | lectin, galactoside-binding, soluble, 12                      | CCDS44633.1     | chr11_63283785-63283785_A_C   | 312S>R  | Substitution | Nonsynonymous coding | 13% |
| MM20T | LIG3     | ligase III, DNA, ATP-dependent                                | CCDS11284.2     | chr17_33310486-33310486_A_    | NA      | Deletion     | Frameshift           | 17% |
| MM20T | LIG4     | ligase IV, DNA, ATP-dependent                                 | CCDS9508.1      | chr13_108861755-108861755_T_C | 621D>G  | Substitution | Nonsynonymous coding | 21% |
| MM20T | LIN7A    | lin-7 homolog A (C. elegans)                                  | CCDS9021.1      | chr12_81239722-81239723_AA_   | NA      | Deletion     | Splice site acceptor | 20% |
| MM20T | LLGL2    | lethal giant larvae homolog 2 (Drosophila)                    | CCDS32733.1     | chr17_73555479-73555479_C_T   | 173A>V  | Substitution | Nonsynonymous coding | 18% |
| MM20T | LMAN1    | lectin, mannose-binding, 1                                    | CCDS11974.1     | chr18_57013194-57013194_T_    | NA      | Deletion     | Frameshift           | 24% |
| MM20T | LMBRD1   | LMBR1 domain containing 1                                     | CCDS4969.1      | chr6_70423610-70423611_TT_    | NA      | Deletion     | Frameshift           | 13% |
| MM20T | LPHN3    | latrophilin 3                                                 | NM_015236       | chr4_62936351-62936351_T_C    | 1379Y>H | Substitution | Nonsynonymous coding | 19% |

|       |          |                                                                   |                 |                              |         |              |                      |     |
|-------|----------|-------------------------------------------------------------------|-----------------|------------------------------|---------|--------------|----------------------|-----|
| MM20T | LPIN2    | lipin 2                                                           | CCDS11829.1     | chr18_2920795-2920798_TTCT_  | NA      | Deletion     | Frameshift           | 21% |
| MM20T | LRP2     | low density lipoprotein receptor-related protein 2                | CCDS2232.1      | chr2_170022553-170022553_A_G | 3883C>R | Substitution | Nonsynonymous coding | 21% |
| MM20T | LRRC4B   | leucine rich repeat containing 4B                                 | CCDS42595.1     | chr19_51022414-51022414_G_A  | 186R>C  | Substitution | Nonsynonymous coding | 24% |
| MM20T | LRRC8C   | leucine rich repeat containing 8 family, member C                 | CCDS725.1       | chr1_90180223-90180223_C_    | NA      | Deletion     | Frameshift           | 20% |
| MM20T | LRRK2    | leucine-rich repeat kinase 2                                      | CCDS31774.1     | chr12_40713870-40713870_A_   | NA      | Deletion     | Frameshift           | 16% |
| MM20T | LRRN1    | leucine rich repeat neuronal 1                                    | CCDS33685.1     | chr3_3886823-3886823_A_      | NA      | Deletion     | Frameshift           | 14% |
| MM20T | LRRN3    | leucine rich repeat neuronal 3                                    | CCDS5754.1      | chr7_110764834-110764834_C_T | 669P>L  | Substitution | Nonsynonymous coding | 21% |
| MM20T | LRRTM3   | leucine rich repeat transmembrane neuronal 3                      | CCDS7270.1      | chr10_68687933-68687933_T_G  | 420I>S  | Substitution | Nonsynonymous coding | 32% |
| MM20T | LTBP2    | latent transforming growth factor beta binding protein 2          | CCDS9831.1      | chr14_74999168-74999168_G_A  | 650P>S  | Substitution | Nonsynonymous coding | 18% |
| MM20T | LUC7L    | LUC7-like ( <i>S. cerevisiae</i> )                                | CCDS32348.1     | chr16_242998-242998_T        | NA      | Insertion    | Frameshift           | 15% |
| MM20T | LY75     | lymphocyte antigen 75                                             | CCDS2211.1      | chr2_160673538-160673538_A_G | 1387Y>H | Substitution | Nonsynonymous coding | 24% |
| MM20T | LYSMD1   | LysM, putative peptidoglycan-binding, domain containing 1         | CCDS986.1       | chr1_151134580-151134580_A_  | NA      | Deletion     | Splice site acceptor | 11% |
| MM20T | MACC1    | metastasis associated in colon cancer 1                           | CCDS5369.1      | chr7_20198000-20198000_A_G   | 662Y>H  | Substitution | Nonsynonymous coding | 29% |
| MM20T | MAG      | myelin associated glycoprotein                                    | CCDS12455.1     | chr19_35791135-35791135_C_   | NA      | Deletion     | Frameshift           | 14% |
| MM20T | MAGEC2   | melanoma antigen family C, 2                                      | CCDS14678.1     | chrX_141291098-141291098_C_A | 226E>X  | Substitution | Nonsense             | 16% |
| MM20T | MAML1    | mastermind-like 1 ( <i>Drosophila</i> )                           | CCDS34315.1     | chr5_179192601-179192601_A_G | 197H>R  | Substitution | Nonsynonymous coding | 22% |
| MM20T | MAN2B2   | mannosidase, alpha, class 2B, member 2                            | CCDS33951.1     | chr4_6610854-6610854_G_T     | 612R>L  | Substitution | Nonsynonymous coding | 18% |
| MM20T | MAP3K12  | mitogen-activated protein kinase kinase kinase 12                 | CCDS8860.1      | chr12_53876615-53876615_C_   | NA      | Deletion     | Frameshift           | 18% |
| MM20T | MAP7D3   | MAP7 domain containing 3                                          | CCDS44004.1     | chrX_135314194-135314194_G_  | NA      | Deletion     | Frameshift           | 10% |
| MM20T | MAPK8IP3 | mitogen-activated protein kinase 8 interacting protein 3          | CCDS10442.2     | chr16_1816621-1816621_A_G    | 970T>A  | Substitution | Nonsynonymous coding | 25% |
| MM20T | MARCKS   | myristoylated alanine-rich protein kinase C substrate             | CCDS5101.1      | chr6_114181210-114181211_AA_ | NA      | Deletion     | Frameshift           | 13% |
| MM20T | MBD6     | methyl-CpG binding domain protein 6                               | CCDS8944.1      | chr12_57921732-57921732_G_   | NA      | Deletion     | Frameshift           | 21% |
| MM20T | MBTPS1   | membrane-bound transcription factor peptidase, site 1             | CCDS10941.1     | chr16_84132882-84132882_G_T  | 66A>D   | Substitution | Nonsynonymous coding | 17% |
| MM20T | MCL1     | myeloid cell leukemia sequence 1 (BCL2-related)                   | CCDS957.1       | chr1_150551952-150551952_C   | NA      | Insertion    | Frameshift           | 20% |
| MM20T | MCM3AP   | minichromosome maintenance complex component 3 associated protein | CCDS13734.1     | chr21_47663486-47663486_T_C  | 1730H>R | Substitution | Nonsynonymous coding | 18% |
| MM20T | MCM3AP   | minichromosome maintenance complex component 3 associated protein | CCDS13734.1     | chr21_47664940-47664940_C_T  | 1607A>T | Substitution | Nonsynonymous coding | 22% |
| MM20T | MCM8     | minichromosome maintenance complex component 8                    | CCDS13094.1     | chr20_5943938-5943938_C_T    | 270R>X  | Substitution | Nonsense             | 21% |
| MM20T | MDM4     | Mdm4 p53 binding protein homolog (mouse)                          | ENST00000391947 | chr1_204507121-204507121_T_  | NA      | Deletion     | Splice site donor    | 10% |
| MM20T | MDN1     | MDN1, midasin homolog (yeast)                                     | CCDS5024.1      | chr6_90385232-90385232_G_A   | 4238R>X | Substitution | Nonsense             | 18% |
| MM20T | MED15    | mediator complex subunit 15                                       | CCDS33602.1     | chr22_20936976-20936976_C_   | NA      | Deletion     | Frameshift           | 13% |
| MM20T | MED16    | mediator complex subunit 16                                       | CCDS12047.1     | chr19_875385-875385_C_T      | 544V>M  | Substitution | Nonsynonymous coding | 24% |
| MM20T | MED20    | mediator complex subunit 20                                       | CCDS4862.1      | chr6_41874847-41874847_C_T   | 201R>H  | Substitution | Nonsynonymous coding | 21% |

|       |          |                                                                            |                 |                              |         |              |                      |     |
|-------|----------|----------------------------------------------------------------------------|-----------------|------------------------------|---------|--------------|----------------------|-----|
| MM20T | MED23    | mediator complex subunit 23                                                | CCDS5147.1      | chr6_131915400-131915400_C_T | 1024R>Q | Substitution | Nonsynonymous coding | 30% |
| MM20T | MEIS1    | Meis homeobox 1                                                            | ENST00000407092 | chr2_66798467-66798467__C    | NA      | Insertion    | Frameshift           | 21% |
| MM20T | MEPCE    | methylphosphate capping enzyme                                             | CCDS5693.1      | chr7_100028068-100028068_G_  | NA      | Deletion     | Frameshift           | 13% |
| MM20T | MESDC2   | mesoderm development candidate 2                                           | CCDS32308.1     | chr15_81271633-81271633_T_   | NA      | Deletion     | Frameshift           | 24% |
| MM20T | MFSD7    | major facilitator superfamily domain containing 7                          | CCDS3338.1      | chr4_677027-677027_C_        | NA      | Deletion     | Frameshift           | 17% |
| MM20T | MGA      | MGA, MAX dimerization protein                                              | NM_001164273    | chr15_42041419-42041419_G_   | NA      | Deletion     | Frameshift           | 13% |
| MM20T | MGA      | MGA, MAX dimerization protein                                              | NM_001164273    | chr15_42003375-42003375_G_A  | 971R>Q  | Substitution | Nonsynonymous coding | 24% |
| MM20T | MIS18BP1 | MIS18 binding protein 1                                                    | CCDS9684.1      | chr14_45693722-45693722_T_   | NA      | Deletion     | Frameshift           | 26% |
| MM20T | MLH1     | mutL homolog 1, colon cancer, nonpolyposis type 2 (E. coli)                | CCDS2663.1      | chr3_37059062-37059062__A    | NA      | Insertion    | Frameshift           | 22% |
| MM20T | MLH1     | mutL homolog 1, colon cancer, nonpolyposis type 2 (E. coli)                | CCDS2663.1      | chr3_37038114-37038114_G_A   | 41D>N   | Substitution | Nonsynonymous coding | 36% |
| MM20T | MLH3     | mutL homolog 3 (E. coli)                                                   | CCDS32123.1     | chr14_75514604-75514604_T_   | NA      | Deletion     | Frameshift           | 18% |
| MM20T | MLL      | myeloid/lymphoid or mixed-lineage leukemia (trithorax homolog, Drosophila) | CCDS31686.1     | chr11_118344186-118344186_C_ | NA      | Deletion     | Frameshift           | 14% |
| MM20T | MLL2     | myeloid/lymphoid or mixed-lineage leukemia 2                               | CCDS44873.1     | chr12_49426973-49426973_G_   | NA      | Deletion     | Frameshift           | 12% |
| MM20T | MLL2     | myeloid/lymphoid or mixed-lineage leukemia 2                               | CCDS44873.1     | chr12_49434492-49434492_G_   | NA      | Deletion     | Frameshift           | 32% |
| MM20T | MLL2     | myeloid/lymphoid or mixed-lineage leukemia 2                               | CCDS44873.1     | chr12_49438548-49438548_C_T  | 1648D>N | Substitution | Nonsynonymous coding | 25% |
| MM20T | MLL2     | myeloid/lymphoid or mixed-lineage leukemia 2                               | CCDS44873.1     | chr12_49446015-49446015_T_C  | 484H>R  | Substitution | Nonsynonymous coding | 22% |
| MM20T | MLL2     | myeloid/lymphoid or mixed-lineage leukemia 2                               | CCDS44873.1     | chr12_49427531-49427531_C_A  | 3653G>X | Substitution | Nonsense             | 15% |
| MM20T | MLNR     | motilin receptor                                                           | CCDS9414.1      | chr13_49794780-49794780_C    | NA      | Insertion    | Frameshift           | 24% |
| MM20T | MOV10    | Mov10, Moloney leukemia virus 10, homolog (mouse)                          | CCDS853.1       | chr1_113232272-113232272_G_A | 193G>S  | Substitution | Nonsynonymous coding | 20% |
| MM20T | MPC2     | mitochondrial pyruvate carrier 2                                           | CCDS1266.1      | chr1_167893779-167893779_A_  | NA      | Deletion     | Splice site acceptor | 10% |
| MM20T | MROH5    | maestro heat-like repeat family member 5                                   | NM_207414       | chr8_142500285-142500285_G_A | 210T>M  | Substitution | Nonsynonymous coding | 15% |
| MM20T | MRPL41   | mitochondrial ribosomal protein L41                                        | CCDS7046.1      | chr9_140446829-140446829_C_T | 99A>V   | Substitution | Nonsynonymous coding | 27% |
| MM20T | MRPS5    | mitochondrial ribosomal protein S5                                         | CCDS2010.1      | chr2_95753233-95753233_G_    | NA      | Deletion     | Frameshift           | 16% |
| MM20T | MRS2     | MRS2 magnesium homeostasis factor homolog (S. cerevisiae)                  | CCDS4552.1      | chr6_24403279-24403279__A    | NA      | Insertion    | Frameshift           | 22% |
| MM20T | MTFMT    | mitochondrial methionyl-tRNA formyltransferase                             | CCDS45280.1     | chr15_65312614-65312614_C_   | NA      | Deletion     | Splice site acceptor | 19% |
| MM20T | MTO1     | mitochondrial translation optimization 1 homolog (S. cerevisiae)           | CCDS47452.1     | chr6_74183349-74183349_G_T   | 266S>I  | Substitution | Nonsynonymous coding | 24% |
| MM20T | MTSS1    | metastasis suppressor 1                                                    | CCDS6353.1      | chr8_125565255-125565255_C_T | 749R>H  | Substitution | Nonsynonymous coding | 17% |
| MM20T | MXRA7    | matrix-remodelling associated 7                                            | ENST00000331934 | chr17_74684727-74684727_C_A  | 1M>I    | Substitution | Nonsynonymous coding | 14% |
| MM20T | MYH15    | myosin, heavy chain 15                                                     | CCDS43127.1     | chr3_108135669-108135669_T_  | NA      | Deletion     | Frameshift           | 16% |
| MM20T | MYH3     | myosin, heavy chain 3, skeletal muscle, embryonic                          | CCDS11157.1     | chr17_10543123-10543123_A_   | NA      | Deletion     | Splice site acceptor | 12% |
| MM20T | MYO3A    | myosin IIIA                                                                | CCDS7148.1      | chr10_26462760-26462760_A_   | NA      | Deletion     | Frameshift           | 18% |
| MM20T | MYO3A    | myosin IIIA                                                                | CCDS7148.1      | chr10_26414497-26414497_A_G  | 692N>D  | Substitution | Nonsynonymous coding | 32% |



|       |              |                                                                                     |                 |                               |         |              |                      |     |
|-------|--------------|-------------------------------------------------------------------------------------|-----------------|-------------------------------|---------|--------------|----------------------|-----|
| MM20T | NARG2        | NMDA receptor regulated 2                                                           | CCDS10176.1     | chr15_60741267-60741267_T_    | NA      | Deletion     | Frameshift           | 27% |
| MM20T | NAT10        | N-acetyltransferase 10 (GCN5-related)                                               | CCDS7889.1      | chr11_34154645-34154645_C_    | NA      | Deletion     | Frameshift           | 17% |
| MM20T | NCAPD3       | non-SMC condensin II complex, subunit D3                                            | CCDS31723.1     | chr11_134064573-134064573_T_A | 559K>M  | Substitution | Nonsynonymous coding | 16% |
| MM20T | NCBP1        | nuclear cap binding protein subunit 1, 80kDa                                        | CCDS6728.1      | chr9_100405491-100405491_G_A  | 77R>H   | Substitution | Nonsynonymous coding | 19% |
| MM20T | NCKAP5L      | NCK-associated protein 5-like                                                       | CCDS41781.2     | chr12_50188959-50188959_A_G   | 895V>A  | Substitution | Nonsynonymous coding | 34% |
| MM20T | NCOA6        | nuclear receptor coactivator 6                                                      | CCDS13241.1     | chr20_33338326-33338327_AA_   | NA      | Deletion     | Splice site acceptor | 12% |
| MM20T | NCOA6        | nuclear receptor coactivator 6                                                      | CCDS13241.1     | chr20_33338326-33338328_AAA_  | NA      | Deletion     | Splice site acceptor | 17% |
| MM20T | NDUFAF6      | NADH dehydrogenase (ubiquinone) complex I, assembly factor 6                        | CCDS6266.2      | chr8_96047807-96047807_A_     | NA      | Deletion     | Splice site donor    | 14% |
| MM20T | NDUFAF6      | NADH dehydrogenase (ubiquinone) complex I, assembly factor 6                        | CCDS6266.2      | chr8_96047807-96047809_AAA_   | NA      | Deletion     | Splice site donor    | 12% |
| MM20T | NEB          | nebulin                                                                             | CCDS46424.1     | chr2_152402516-152402517_AA_  | NA      | Deletion     | Splice site acceptor | 16% |
| MM20T | NEB          | nebulin                                                                             | CCDS46424.1     | chr2_152402516-152402516_A_   | NA      | Deletion     | Splice site acceptor | 13% |
| MM20T | NEK7         | NIMA-related kinase 7                                                               | CCDS1394.1      | chr1_198222298-198222298_A_   | NA      | Deletion     | Frameshift           | 17% |
| MM20T | NEU3         | sialidase 3 (membrane sialidase)                                                    | CCDS44682.1     | chr11_74716990-74716990_C_A   | 280P>Q  | Substitution | Nonsynonymous coding | 13% |
| MM20T | NEXN         | nexilin (F actin binding protein)                                                   | CCDS41351.1     | chr1_78392424-78392424_A_     | NA      | Deletion     | Frameshift           | 20% |
| MM20T | NFATC4       | nuclear factor of activated T-cells, cytoplasmic, calcineurin-dependent 4           | CCDS45089.1     | chr14_24846045-24846045_C_T   | 931R>X  | Substitution | Nonsense             | 20% |
| MM20T | NFE2L1       | nuclear factor (erythroid-derived 2)-like 1                                         | CCDS11524.1     | chr17_46135788-46135788_G_    | NA      | Deletion     | Frameshift           | 22% |
| MM20T | NFKB1        | nuclear factor of kappa light polypeptide gene enhancer in B-cells 1                | CCDS3657.1      | chr4_103534741-103534741_A_   | NA      | Deletion     | Splice site donor    | 18% |
| MM20T | NFKBID       | nuclear factor of kappa light polypeptide gene enhancer in B-cells inhibitor, delta | CCDS42552.1     | chr19_36387012-36387012_G_    | NA      | Deletion     | Frameshift           | 19% |
| MM20T | NHLRC2       | NHL repeat containing 2                                                             | CCDS7585.1      | chr10_115668126-115668126_A_G | 671D>G  | Substitution | Nonsynonymous coding | 23% |
| MM20T | NLRC5        | NLR family, CARD domain containing 5                                                | CCDS10773.1     | chr16_57068160-57068160_T_C   | 875V>A  | Substitution | Nonsynonymous coding | 18% |
| MM20T | NLRX1        | NLR family member X1                                                                | CCDS8416.1      | chr11_119050957-119050957_C_T | 743R>C  | Substitution | Nonsynonymous coding | 39% |
| MM20T | NM_001166280 | -                                                                                   | NM_001166280    | chr9_113491001-113491001_T_   | NA      | Deletion     | Splice site donor    | 18% |
| MM20T | NOC4L        | nucleolar complex associated 4 homolog (S. cerevisiae)                              | CCDS9277.1      | chr12_132635525-132635525_G_  | NA      | Deletion     | Splice site acceptor | 13% |
| MM20T | NOL10        | nucleolar protein 10                                                                | CCDS1673.2      | chr2_10794667-10794667_T_     | NA      | Deletion     | Frameshift           | 14% |
| MM20T | NOTCH3       | notch 3                                                                             | CCDS12326.1     | chr19_15272321-15272321_C_T   | 2040G>R | Substitution | Nonsynonymous coding | 16% |
| MM20T | NPC1L1       | NPC1-like 1                                                                         | CCDS5491.1      | chr7_44578618-44578618_C_T    | 460E>K  | Substitution | Nonsynonymous coding | 27% |
| MM20T | NPDC1        | neural proliferation, differentiation and control, 1                                | ENST00000371600 | chr9_139937579-139937579_C_T  | 98R>K   | Substitution | Nonsynonymous coding | 27% |
| MM20T | NPHP4        | nephronophthisis 4                                                                  | CCDS44052.1     | chr1_5935066-5935066_A_G      | 971L>P  | Substitution | Nonsynonymous coding | 11% |
| MM20T | NPHS2        | nephrosis 2, idiopathic, steroid-resistant (podocin)                                | CCDS1331.1      | chr1_179528881-179528881_A_   | NA      | Insertion    | Frameshift           | 18% |
| MM20T | NPTN         | neuroplastin                                                                        | CCDS10249.1     | chr15_73889642-73889642_C_T   | 54V>M   | Substitution | Nonsynonymous coding | 16% |
| MM20T | NR1I3        | nuclear receptor subfamily 1, group I, member 3                                     | CCDS41429.1     | chr1_161199684-161199684_G_A  | 326A>V  | Substitution | Nonsynonymous coding | 24% |
| MM20T | NR2E1        | nuclear receptor subfamily 2, group E, member 1                                     | CCDS5063.1      | chr6_108508599-108508599_A_   | NA      | Deletion     | Frameshift           | 17% |

|       |        |                                                                |                 |                               |         |              |                      |     |
|-------|--------|----------------------------------------------------------------|-----------------|-------------------------------|---------|--------------|----------------------|-----|
| MM20T | NRD1   | nardilysin (N-arginine dibasic convertase)                     | CCDS5559.1      | chr1_52305912-52305912__T     | NA      | Insertion    | Frameshift           | 25% |
| MM20T | NSUN4  | NOP2/Sun domain family, member 4                               | CCDS534.1       | chr1_46818540-46818540_G_A    | 198R>H  | Substitution | Nonsynonymous coding | 22% |
| MM20T | NTN3   | netrin 3                                                       | CCDS10469.1     | chr16_2522299-2522299_C_      | NA      | Deletion     | Frameshift           | 10% |
| MM20T | NUCKS1 | nuclear casein kinase and cyclin-dependent kinase substrate 1  | CCDS30987.1     | chr1_205693108-205693108_C_T  | 59E>K   | Substitution | Nonsynonymous coding | 13% |
| MM20T | NUDT9  | nudix (nucleoside diphosphate linked moiety X)-type motif 9    | CCDS3620.1      | chr4_88370386-88370386_G_A    | 208G>E  | Substitution | Nonsynonymous coding | 20% |
| MM20T | NUSAP1 | nucleolar and spindle associated protein 1                     | CCDS45234.1     | chr15_41663885-41663885_A_    | NA      | Deletion     | Splice site donor    | 30% |
| MM20T | NXPE3  | neurexophilin and PC-esterase domain family, member 3          | CCDS2945.1      | chr3_101540521-101540521_T_C  | 468V>A  | Substitution | Nonsynonymous coding | 22% |
| MM20T | NYX    | nyctalopin                                                     | CCDS14256.1     | chrX_41333784-41333784_G_A    | 360V>M  | Substitution | Nonsynonymous coding | 31% |
| MM20T | NYX    | nyctalopin                                                     | CCDS14256.1     | chrX_41333841-41333841_G_A    | 379G>R  | Substitution | Nonsynonymous coding | 19% |
| MM20T | OAF    | OAF homolog (Drosophila)                                       | CCDS8430.1      | chr11_120099717-120099717_A_G | 230K>E  | Substitution | Nonsynonymous coding | 21% |
| MM20T | OAS2   | 2'-5'-oligoadenylate synthetase 2, 69/71kDa                    | CCDS31906.1     | chr12_113443000-113443000_G_T | 481D>Y  | Substitution | Nonsynonymous coding | 14% |
| MM20T | OBSCN  | obscurin, cytoskeletal calmodulin and titin-interacting RhoGEF | NM_001098623    | chr1_228399974-228399974_G_A  | 164G>S  | Substitution | Nonsynonymous coding | 12% |
| MM20T | ODAM   | odontogenic, ameloblast associated                             | CCDS3536.2      | chr4_71063019-71063019_T_     | NA      | Deletion     | Frameshift           | 26% |
| MM20T | OGN    | osteoglycin                                                    | CCDS6695.1      | chr9_95152327-95152327_T_C    | 147R>G  | Substitution | Nonsynonymous coding | 33% |
| MM20T | OLFM1  | olfactomedin 1                                                 | CCDS6986.1      | chr9_138011750-138011750_C_T  | 377T>M  | Substitution | Nonsynonymous coding | 23% |
| MM20T | OLFML1 | olfactomedin-like 1                                            | CCDS7779.1      | chr11_7531159-7531159_G_A     | 317A>T  | Substitution | Nonsynonymous coding | 22% |
| MM20T | OPLAH  | 5-oxoprolinase (ATP-hydrolysing)                               | ENST00000426825 | chr8_145106935-145106937_CGA_ | 1168S>- | Deletion     | In-frame deletion    | 18% |
| MM20T | OPRD1  | opioid receptor, delta 1                                       | CCDS329.1       | chr1_29185779-29185779_G_A    | 181V>M  | Substitution | Nonsynonymous coding | 29% |
| MM20T | OPRD1  | opioid receptor, delta 1                                       | CCDS329.1       | chr1_29189350-29189350_C_A    | 225P>H  | Substitution | Nonsynonymous coding | 13% |
| MM20T | OPRL1  | opiate receptor-like 1                                         | CCDS13556.1     | chr20_62729886-62729886_G_A   | 283V>M  | Substitution | Nonsynonymous coding | 24% |
| MM20T | OR1M1  | olfactory receptor, family 1, subfamily M, member 1            | CCDS32896.1     | chr19_9204215-9204215_A_T     | 99I>F   | Substitution | Nonsynonymous coding | 20% |
| MM20T | OR2A2  | olfactory receptor, family 2, subfamily A, member 2            | CCDS43671.1     | chr7_143806709-143806709_A_G  | 12T>A   | Substitution | Nonsynonymous coding | 17% |
| MM20T | OR5M3  | olfactory receptor, family 5, subfamily M, member 3            | CCDS31532.1     | chr11_56237709-56237709_T_    | NA      | Deletion     | Frameshift           | 15% |
| MM20T | OR6B1  | olfactory receptor, family 6, subfamily B, member 1            | CCDS43667.1     | chr7_143701290-143701292_CTT_ | 675F>S  | Deletion     | In-frame deletion    | 27% |
| MM20T | OR6C76 | olfactory receptor, family 6, subfamily C, member 76           | CCDS31823.1     | chr12_55820959-55820961_AAA_  | 308K>-  | Deletion     | In-frame deletion    | 17% |
| MM20T | OR7E24 | olfactory receptor, family 7, subfamily E, member 24           | CCDS45955.1     | chr19_9361741-9361741_T_      | NA      | Deletion     | Frameshift           | 33% |
| MM20T | OR8I2  | olfactory receptor, family 8, subfamily I, member 2            | CCDS31517.1     | chr11_55861308-55861308_T_    | NA      | Deletion     | Frameshift           | 16% |
| MM20T | ORC2   | origin recognition complex, subunit 2                          | CCDS2334.1      | chr2_201778718-201778720_AAA_ | NA      | Deletion     | Splice site acceptor | 27% |
| MM20T | OTUD7A | OTU domain containing 7A                                       | CCDS10026.1     | chr15_31851292-31851292__G    | NA      | Insertion    | Frameshift           | 26% |
| MM20T | P4HA2  | prolyl 4-hydroxylase, alpha polypeptide II                     | CCDS4151.1      | chr5_131528749-131528749_C_T  | 521R>Q  | Substitution | Nonsynonymous coding | 24% |
| MM20T | P4HTM  | prolyl 4-hydroxylase, transmembrane (endoplasmic reticulum)    | CCDS2781.2      | chr3_49028312-49028312_T_G    | 134F>C  | Substitution | Nonsynonymous coding | 36% |
| MM20T | PACRG  | PARK2 co-regulated                                             | CCDS5284.1      | chr6_163735909-163735909_G_   | NA      | Deletion     | Frameshift           | 19% |

|       |         |                                                                         |                 |                                |         |              |                      |     |
|-------|---------|-------------------------------------------------------------------------|-----------------|--------------------------------|---------|--------------|----------------------|-----|
| MM20T | PACS1   | phosphofurin acidic cluster sorting protein 1                           | CCDS8129.1      | chr11_65838138-65838138_T_C    | 61S>P   | Substitution | Nonsynonymous coding | 24% |
| MM20T | PACSN2  | protein kinase C and casein kinase substrate in neurons 2               | CCDS43023.1     | chr22_43308086-43308086__T     | NA      | Insertion    | Frameshift           | 24% |
| MM20T | PANX2   | pannexin 2                                                              | CCDS14085.2     | chr22_50617461-50617461_G_A    | 597A>T  | Substitution | Nonsynonymous coding | 31% |
| MM20T | PAPOLA  | poly(A) polymerase alpha                                                | CCDS9946.1      | chr14_97002234-97002234_T_A    | 310Y>N  | Substitution | Nonsynonymous coding | 35% |
| MM20T | PAPOLB  | poly(A) polymerase beta (testis specific)                               | NM_020144       | chr7_4900105-4900105_T__       | NA      | Deletion     | Frameshift           | 25% |
| MM20T | PAQR3   | progesterin and adipoQ receptor family member III                       | CCDS34020.1     | chr4_79860321-79860321_A_C     | 20W>G   | Substitution | Nonsynonymous coding | 19% |
| MM20T | PAQR6   | progesterin and adipoQ receptor family member VI                        | CCDS1135.1      | chr1_156213778-156213781_CTCT_ | NA      | Deletion     | Frameshift           | 22% |
| MM20T | PAQR6   | progesterin and adipoQ receptor family member VI                        | CCDS1136.1      | chr1_156215934-156215934_C_G   | 53W>C   | Substitution | Nonsynonymous coding | 32% |
| MM20T | PAX1    | paired box 1                                                            | CCDS13146.2     | chr20_21687487-21687487_C_A    | 233P>Q  | Substitution | Nonsynonymous coding | 16% |
| MM20T | PAXBP1  | PAX3 and PAX7 binding protein 1                                         | CCDS13619.1     | chr21_34127581-34127581_A_T    | 489D>E  | Substitution | Nonsynonymous coding | 18% |
| MM20T | PC      | pyruvate carboxylase                                                    | CCDS8152.1      | chr11_66618531-66618531_T_C    | 735T>A  | Substitution | Nonsynonymous coding | 10% |
| MM20T | PCCB    | propionyl CoA carboxylase, beta polypeptide                             | CCDS3089.1      | chr3_136046090-136046090_C_A   | 431T>N  | Substitution | Nonsynonymous coding | 26% |
| MM20T | PCDH12  | protocadherin 12                                                        | CCDS4269.1      | chr5_141335636-141335636_G_A   | 594T>I  | Substitution | Nonsynonymous coding | 18% |
| MM20T | PCDH15  | protocadherin-related 15                                                | CCDS44404.1     | chr10_55782948-55782948_G_A    | 744P>S  | Substitution | Nonsynonymous coding | 12% |
| MM20T | PCDH19  | protocadherin 19                                                        | CCDS43976.1     | chrX_99662505-99662505_G_      | NA      | Deletion     | Frameshift           | 22% |
| MM20T | PCDH81  | protocadherin beta 1                                                    | CCDS4243.1      | chr5_140433379-140433379_T_C   | 775M>T  | Substitution | Nonsynonymous coding | 22% |
| MM20T | PCDH85  | protocadherin beta 5                                                    | CCDS4247.1      | chr5_140516204-140516204_A_    | NA      | Deletion     | Frameshift           | 16% |
| MM20T | PCDH88  | protocadherin beta 8                                                    | CCDS4250.1      | chr5_140557659-140557659_T_    | NA      | Deletion     | Frameshift           | 11% |
| MM20T | PCDHGA8 | protocadherin gamma subfamily A, 8                                      | CCDS47291.1     | chr5_140774362-140774362_C_T   | 661T>I  | Substitution | Nonsynonymous coding | 30% |
| MM20T | PCSK4   | proprotein convertase subtilisin/kexin type 4                           | CCDS12069.2     | chr19_1483647-1483647_A_G      | NA      | Substitution | Splice site donor    | 27% |
| MM20T | PCSK5   | proprotein convertase subtilisin/kexin type 5                           | CCDS6652.1      | chr9_78790010-78790010_A_G     | 622D>G  | Substitution | Nonsynonymous coding | 15% |
| MM20T | PCSK6   | proprotein convertase subtilisin/kexin type 6                           | ENST00000331826 | chr15_101862773-101862773_T_   | NA      | Deletion     | Frameshift           | 13% |
| MM20T | PDE6C   | phosphodiesterase 6C, cGMP-specific, cone, alpha prime                  | CCDS7429.1      | chr10_95372786-95372786_C_T    | 102R>W  | Substitution | Nonsynonymous coding | 20% |
| MM20T | PDZD4   | PDZ domain containing 4                                                 | CCDS14732.1     | chrX_153070556-153070556_T_C   | 253Q>R  | Substitution | Nonsynonymous coding | 17% |
| MM20T | PDZD7   | PDZ domain containing 7                                                 | CCDS31269.1     | chr10_102781620-102781620_C_T  | 268D>N  | Substitution | Nonsynonymous coding | 13% |
| MM20T | PHACTR4 | phosphatase and actin regulator 4                                       | CCDS41294.1     | chr1_28785730-28785730_A_      | NA      | Deletion     | Frameshift           | 19% |
| MM20T | PHC3    | polyhomeotic homolog 3 (Drosophila)                                     | CCDS46952.1     | chr3_169835268-169835268_A_    | NA      | Deletion     | Splice site acceptor | 21% |
| MM20T | PHC3    | polyhomeotic homolog 3 (Drosophila)                                     | CCDS46952.1     | chr3_169835268-169835268_A     | NA      | Insertion    | Splice site acceptor | 28% |
| MM20T | PIBF1   | progesterone immunomodulatory binding factor 1                          | CCDS31991.1     | chr13_73409509-73409510_AA_    | NA      | Deletion     | Splice site donor    | 14% |
| MM20T | PIEZO1  | piezo-type mechanosensitive ion channel component 1                     | NM_001142864    | chr16_88787978-88787978_T_C    | 1791M>V | Substitution | Nonsynonymous coding | 27% |
| MM20T | PIEZO1  | piezo-type mechanosensitive ion channel component 1                     | NM_001142864    | chr16_88804055-88804055_C_T    | NA      | Substitution | Splice site acceptor | 20% |
| MM20T | PIK3CA  | phosphatidylinositol-4,5-bisphosphate 3-kinase, catalytic subunit alpha | CCDS43171.1     | chr3_178916944-178916944_A_G   | 111K>E  | Substitution | Nonsynonymous coding | 28% |

|       |         |                                                                               |                 |                               |          |              |                      |     |
|-------|---------|-------------------------------------------------------------------------------|-----------------|-------------------------------|----------|--------------|----------------------|-----|
| MM20T | PIP4K2A | phosphatidylinositol-5-phosphate 4-kinase, type II, alpha                     | CCDS7141.1      | chr10_22830828-22830828__G    | NA       | Insertion    | Frameshift           | 14% |
| MM20T | PKP3    | plakophilin 3                                                                 | CCDS7695.1      | chr11_397285-397285__G        | NA       | Insertion    | Frameshift           | 15% |
| MM20T | PLAC1L  | placenta-specific 1-like                                                      | CCDS7979.1      | chr11_59811020-59811020_C_T   | 48A>V    | Substitution | Nonsynonymous coding | 31% |
| MM20T | PLAG1   | pleiomorphic adenoma gene 1                                                   | CCDS6165.1      | chr8_57079502-57079502_G_A    | 268P>L   | Substitution | Nonsynonymous coding | 21% |
| MM20T | PLAGL1  | pleiomorphic adenoma gene-like 1                                              | CCDS5202.1      | chr6_144263685-144263685_C_G  | 90A>P    | Substitution | Nonsynonymous coding | 19% |
| MM20T | PLAT    | plasminogen activator, tissue                                                 | CCDS6126.1      | chr8_42039493-42039493_C_T    | 284R>H   | Substitution | Nonsynonymous coding | 28% |
| MM20T | PLCD1   | phospholipase C, delta 1                                                      | CCDS46793.1     | chr3_38051689-38051689_C_T    | 378G>D   | Substitution | Nonsynonymous coding | 15% |
| MM20T | PLCG2   | phospholipase C, gamma 2 (phosphatidylinositol-specific)                      | CCDS42204.1     | chr16_81942125-81942125__G    | NA       | Insertion    | Frameshift           | 24% |
| MM20T | PLEC    | plectin                                                                       | CCDS43772.1     | chr8_145009386-145009386_G_A  | 370T>M   | Substitution | Nonsynonymous coding | 16% |
| MM20T | PLEKHA5 | pleckstrin homology domain containing, family A member 5                      | CCDS8682.1      | chr12_19410475-19410476_TT_   | NA       | Deletion     | Splice site donor    | 17% |
| MM20T | PLEKHA6 | pleckstrin homology domain containing, family A member 6                      | CCDS1444.1      | chr1_204234135-204234135_G_   | NA       | Deletion     | Frameshift           | 31% |
| MM20T | PLEKHB2 | pleckstrin homology domain containing, family B (evectins) member 2           | CCDS46413.1     | chr2_131897797-131897797_T_A  | 161Y>N   | Substitution | Nonsynonymous coding | 24% |
| MM20T | PLEKHF1 | pleckstrin homology domain containing, family F (with FYVE domain) member 1   | CCDS12417.1     | chr19_30164787-30164787_G_A   | 14R>H    | Substitution | Nonsynonymous coding | 23% |
| MM20T | PLEKHG1 | pleckstrin homology domain containing, family G (with RhoGef domain) member 1 | CCDS34552.1     | chr6_151152318-151152318_G_A  | 691V>I   | Substitution | Nonsynonymous coding | 18% |
| MM20T | PLXNB2  | plexin B2                                                                     | CCDS43035.1     | chr22_50720047-50720047_G_A   | 1157P>L  | Substitution | Nonsynonymous coding | 12% |
| MM20T | PMS1    | PMS1 postmeiotic segregation increased 1 (S. cerevisiae)                      | ENST00000409985 | chr2_190670540-190670540_A_   | NA       | Deletion     | Frameshift           | 27% |
| MM20T | PMS2    | PMS2 postmeiotic segregation increased 2 (S. cerevisiae)                      | CCDS5343.1      | chr7_6037058-6037060_AAA_     | NA       | Deletion     | Splice site acceptor | 25% |
| MM20T | PNP     | purine nucleoside phosphorylase                                               | CCDS9552.1      | chr14_20943231-20943231_C_T   | 158R>C   | Substitution | Nonsynonymous coding | 33% |
| MM20T | PNPLA8  | patatin-like phospholipase domain containing 8                                | CCDS34733.1     | chr7_108155380-108155380_T_C  | 186K>E   | Substitution | Nonsynonymous coding | 35% |
| MM20T | PNPT1   | polyribonucleotide nucleotidyltransferase 1                                   | CCDS1856.1      | chr2_55883510-55883512_AAA_   | NA       | Deletion     | Splice site acceptor | 12% |
| MM20T | PNPT1   | polyribonucleotide nucleotidyltransferase 1                                   | CCDS1856.1      | chr2_55883510-55883511_AA_    | NA       | Deletion     | Splice site acceptor | 10% |
| MM20T | POLD1   | polymerase (DNA directed), delta 1, catalytic subunit                         | CCDS12795.1     | chr19_50920347-50920349_AGA_  | 1038QK>Q | Deletion     | In-frame deletion    | 18% |
| MM20T | POLE    | polymerase (DNA directed), epsilon, catalytic subunit                         | CCDS9278.1      | chr12_133240729-133240729_G_T | 856P>H   | Substitution | Nonsynonymous coding | 19% |
| MM20T | POLE    | polymerase (DNA directed), epsilon, catalytic subunit                         | CCDS9278.1      | chr12_133237754-133237755_AA_ | NA       | Deletion     | Splice site acceptor | 14% |
| MM20T | POLE3   | polymerase (DNA directed), epsilon 3, accessory subunit                       | CCDS6795.1      | chr9_116171195-116171195_T_   | NA       | Deletion     | Frameshift           | 27% |
| MM20T | POLR3B  | polymerase (RNA) III (DNA directed) polypeptide B                             | CCDS9105.1      | chr12_106804740-106804740_T_C | NA       | Substitution | Splice site donor    | 22% |
| MM20T | PPIL2   | peptidylprolyl isomerase (cyclophilin)-like 2                                 | CCDS46670.1     | chr22_22049309-22049309_C_    | NA       | Deletion     | Frameshift           | 16% |
| MM20T | PPOX    | protoporphyrinogen oxidase                                                    | CCDS1221.1      | chr1_161138274-161138274_G_A  | 175S>N   | Substitution | Nonsynonymous coding | 17% |
| MM20T | PPP3CA  | protein phosphatase 3, catalytic subunit, alpha isozyme                       | CCDS34037.1     | chr4_101984455-101984457_GAG_ | 338PH>H  | Deletion     | In-frame deletion    | 26% |
| MM20T | PPRC1   | peroxisome proliferator-activated receptor gamma, coactivator-related 1       | CCDS7529.1      | chr10_103908158-103908158_G_A | 1477R>Q  | Substitution | Nonsynonymous coding | 30% |
| MM20T | PPT1    | palmitoyl-protein thioesterase 1                                              | ENST00000372775 | chr1_40544493-40544493_T_     | NA       | Deletion     | Frameshift           | 24% |
| MM20T | PRDM2   | PR domain containing 2, with ZNF domain                                       | CCDS150.1       | chr1_14106067-14106067_G_A    | 593A>T   | Substitution | Nonsynonymous coding | 27% |

|       |           |                                                                                     |                 |                              |         |              |                      |     |
|-------|-----------|-------------------------------------------------------------------------------------|-----------------|------------------------------|---------|--------------|----------------------|-----|
| MM20T | PRICKLE3  | prickle homolog 3 (Drosophila)                                                      | ENST00000417014 | chrX_49040116-49040116__GT   | NA      | Insertion    | Frameshift           | 14% |
| MM20T | PROX1     | prospero homeobox 1                                                                 | CCDS31021.1     | chr1_214171517-214171517_G_A | 547A>T  | Substitution | Nonsynonymous coding | 17% |
| MM20T | PRPF4B    | PRP4 pre-mRNA processing factor 4 homolog B (yeast)                                 | CCDS4488.1      | chr6_4032804-4032806_AAG_    | 351KR>K | Deletion     | In-frame deletion    | 15% |
| MM20T | PRR11     | proline rich 11                                                                     | CCDS11614.1     | chr17_57247171-57247171_A_   | NA      | Deletion     | Frameshift           | 23% |
| MM20T | PRRT2     | proline-rich transmembrane protein 2                                                | CCDS10654.1     | chr16_29825016-29825016_C_   | NA      | Deletion     | Frameshift           | 36% |
| MM20T | PRSS38    | protease, serine, 38                                                                | CCDS1563.1      | chr1_228004963-228004963_T_C | 122V>A  | Substitution | Nonsynonymous coding | 16% |
| MM20T | PSMC3IP   | PSMC3 interacting protein                                                           | CCDS45688.1     | chr17_40726224-40726224_T_C  | 77Q>R   | Substitution | Nonsynonymous coding | 24% |
| MM20T | PSME4     | proteasome (prosome, macropain) activator subunit 4                                 | CCDS33197.2     | chr2_54167140-54167140_G_    | NA      | Deletion     | Splice site acceptor | 16% |
| MM20T | PSORS1C1  | psoriasis susceptibility 1 candidate 1                                              | CCDS34390.1     | chr6_31106501-31106501_C_    | NA      | Deletion     | Frameshift           | 18% |
| MM20T | PSTPIP2   | proline-serine-threonine phosphatase interacting protein 2                          | CCDS32820.2     | chr18_43595906-43595906_A_   | NA      | Deletion     | Splice site acceptor | 11% |
| MM20T | PTEN      | phosphatase and tensin homolog                                                      | NM_000314       | chr10_89717770-89717770_A_   | NA      | Deletion     | Frameshift           | 33% |
| MM20T | PTH LH    | parathyroid hormone-like hormone                                                    | ENST00000354417 | chr12_28114898-28114899_TT_  | NA      | Deletion     | Frameshift           | 15% |
| MM20T | PTPLA     | protein tyrosine phosphatase-like (proline instead of catalytic arginine), member A | CCDS7121.1      | chr10_17646049-17646050_AA_  | NA      | Deletion     | Splice site acceptor | 14% |
| MM20T | PTPN3     | protein tyrosine phosphatase, non-receptor type 3                                   | CCDS6776.1      | chr9_112144614-112144614_T_G | 832R>S  | Substitution | Nonsynonymous coding | 31% |
| MM20T | PTPN4     | protein tyrosine phosphatase, non-receptor type 4 (megakaryocyte)                   | CCDS2129.1      | chr2_120672784-120672784_G_A | 265C>Y  | Substitution | Nonsynonymous coding | 19% |
| MM20T | PTPRB     | protein tyrosine phosphatase, receptor type, B                                      | CCDS44943.1     | chr12_70989921-70989921_A_   | NA      | Deletion     | Frameshift           | 19% |
| MM20T | PXDN      | peroxidasin homolog (Drosophila)                                                    | CCDS46221.1     | chr2_1652960-1652960_G_      | NA      | Deletion     | Frameshift           | 15% |
| MM20T | PXDN      | peroxidasin homolog (Drosophila)                                                    | CCDS46221.1     | chr2_1652553-1652553_G_A     | 1000T>M | Substitution | Nonsynonymous coding | 21% |
| MM20T | PXN       | paxillin                                                                            | CCDS44997.1     | chr12_120662042-120662042_G_ | NA      | Deletion     | Frameshift           | 17% |
| MM20T | PYGO1     | pygopus homolog 1 (Drosophila)                                                      | CCDS10155.1     | chr15_55841196-55841196_A_   | NA      | Deletion     | Splice site acceptor | 19% |
| MM20T | RAB11FIP3 | RAB11 family interacting protein 3 (class II)                                       | CCDS32351.1     | chr16_570748-570750_AGG_     | 727QE>Q | Deletion     | In-frame deletion    | 25% |
| MM20T | RAB11FIP5 | RAB11 family interacting protein 5 (class I)                                        | CCDS1923.1      | chr2_73315293-73315293_C_    | NA      | Deletion     | Frameshift           | 16% |
| MM20T | RABGAP1   | RAB GTPase activating protein 1                                                     | CCDS6848.2      | chr9_125861042-125861042_A_  | NA      | Deletion     | Frameshift           | 20% |
| MM20T | RAD17     | RAD17 homolog (S. pombe)                                                            | CCDS4003.1      | chr5_68692376-68692377_AA_   | NA      | Deletion     | Splice site donor    | 21% |
| MM20T | RAD50     | RAD50 homolog (S. cerevisiae)                                                       | CCDS34233.1     | chr5_131931452-131931452_A_  | NA      | Deletion     | Frameshift           | 17% |
| MM20T | RAG2      | recombination activating gene 2                                                     | CCDS7903.1      | chr11_36614223-36614223_T_   | NA      | Deletion     | Frameshift           | 16% |
| MM20T | RALGAPB   | Ral GTPase activating protein, beta subunit (non-catalytic)                         | CCDS13305.1     | chr20_37128089-37128089_G_A  | NA      | Substitution | Splice site acceptor | 21% |
| MM20T | RAPGEF5   | Rap guanine nucleotide exchange factor (GEF) 5                                      | ENST00000344041 | chr7_22190132-22190136_AAAA_ | NA      | Deletion     | Splice site acceptor | 23% |
| MM20T | RAPGEF5   | Rap guanine nucleotide exchange factor (GEF) 5                                      | ENST00000344041 | chr7_22190132-22190135_AAAA_ | NA      | Deletion     | Splice site acceptor | 17% |
| MM20T | RAPGEF5   | Rap guanine nucleotide exchange factor (GEF) 5                                      | NM_012294       | chr7_22330863-22330864_AA_   | NA      | Deletion     | Splice site acceptor | 27% |
| MM20T | RAPGEF5   | Rap guanine nucleotide exchange factor (GEF) 5                                      | NM_012294       | chr7_22330863-22330865_AAA_  | NA      | Deletion     | Splice site acceptor | 15% |
| MM20T | RAPGEF6   | Rap guanine nucleotide exchange factor (GEF) 6                                      | CCDS34225.1     | chr5_130883784-130883784_G_A | 151R>C  | Substitution | Nonsynonymous coding | 18% |

|       |               |                                                                               |                 |                              |         |              |                      |     |
|-------|---------------|-------------------------------------------------------------------------------|-----------------|------------------------------|---------|--------------|----------------------|-----|
| MM20T | RASA1         | RAS p21 protein activator (GTPase activating protein) 1                       | CCDS34200.1     | chr5_86564763-86564766_GGAG_ | NA      | Deletion     | Frameshift           | 22% |
| MM20T | RASA1         | RAS p21 protein activator (GTPase activating protein) 1                       | CCDS34200.1     | chr5_86675571-86675571__A    | NA      | Insertion    | Frameshift           | 18% |
| MM20T | RASAL1        | RAS protein activator like 1 (GAP1 like)                                      | CCDS9165.1      | chr12_113565943-113565943_C_ | NA      | Deletion     | Frameshift           | 14% |
| MM20T | RASEF         | RAS and EF-hand domain containing                                             | CCDS6662.1      | chr9_85615489-85615489_T_    | NA      | Deletion     | Splice site acceptor | 18% |
| MM20T | RASGEF1C      | RasGEF domain family, member 1C                                               | CCDS4452.1      | chr5_179563481-179563481_T_C | 112Q>R  | Substitution | Nonsynonymous coding | 23% |
| MM20T | RB1CC1        | RB1-inducible coiled-coil 1                                                   | CCDS34892.1     | chr8_53543091-53543092_AA_   | NA      | Deletion     | Splice site acceptor | 19% |
| MM20T | RB1CC1        | RB1-inducible coiled-coil 1                                                   | CCDS34892.1     | chr8_53543091-53543093_AAA_  | NA      | Deletion     | Splice site acceptor | 27% |
| MM20T | RBL1          | retinoblastoma-like 1 (p107)                                                  | CCDS13289.1     | chr20_35696592-35696593_AA_  | NA      | Deletion     | Splice site acceptor | 17% |
| MM20T | RBM27         | RNA binding motif protein 27                                                  | CCDS43378.1     | chr5_145610462-145610462_C_T | 278R>X  | Substitution | Nonsense             | 27% |
| MM20T | RBM6          | RNA binding motif protein 6                                                   | CCDS2809.1      | chr3_50103861-50103861_T_C   | 957C>R  | Substitution | Nonsynonymous coding | 26% |
| MM20T | RBMXL2        | RNA binding motif protein, X-linked-like 2                                    | CCDS7777.1      | chr11_7111220-7111220_G_T    | 290R>L  | Substitution | Nonsynonymous coding | 17% |
| MM20T | RC3H2         | ring finger and CCCH-type domains 2                                           | CCDS43874.1     | chr9_125655309-125655310_AA_ | NA      | Deletion     | Splice site acceptor | 41% |
| MM20T | RCC1          | regulator of chromosome condensation 1                                        | CCDS41295.1     | chr1_28856410-28856410_C_    | NA      | Deletion     | Frameshift           | 18% |
| MM20T | RELN          | reelin                                                                        | CCDS47680.1     | chr7_103206002-103206002_A_  | NA      | Deletion     | Splice site acceptor | 36% |
| MM20T | REV3L         | REV3-like, polymerase (DNA directed), zeta, catalytic subunit                 | CCDS5091.2      | chr6_111701188-111701188_T_  | NA      | Deletion     | Frameshift           | 14% |
| MM20T | REXO1         | REX1, RNA exonuclease 1 homolog (S. cerevisiae)                               | CCDS32866.1     | chr19_1827867-1827867_G_     | NA      | Deletion     | Frameshift           | 19% |
| MM20T | RFX6          | regulatory factor X, 6                                                        | CCDS5113.1      | chr6_117215221-117215221_T_C | 213L>S  | Substitution | Nonsynonymous coding | 16% |
| MM20T | RGAG4         | retrotransposon gag domain containing 4                                       | NM_001024455    | chrX_71351029-71351029_G_    | NA      | Deletion     | Frameshift           | 10% |
| MM20T | RGS22         | regulator of G-protein signaling 22                                           | CCDS43758.1     | chr8_101076178-101076178_C_T | 273G>E  | Substitution | Nonsynonymous coding | 18% |
| MM20T | RGS3          | regulator of G-protein signaling 3                                            | CCDS35114.1     | chr9_116356323-116356323_T_  | NA      | Deletion     | Frameshift           | 22% |
| MM20T | RHCE          | Rh blood group, CcEe antigens                                                 | CCDS30635.1     | chr1_25718527-25718527_T_C   | 198N>D  | Substitution | Nonsynonymous coding | 24% |
| MM20T | RIMS2         | regulating synaptic membrane exocytosis 2                                     | CCDS43761.1     | chr8_104897887-104897887_C_T | 162R>W  | Substitution | Nonsynonymous coding | 29% |
| MM20T | RIMS2         | regulating synaptic membrane exocytosis 2                                     | CCDS43761.1     | chr8_104897909-104897909_G_A | 169R>Q  | Substitution | Nonsynonymous coding | 26% |
| MM20T | RNF123        | ring finger protein 123                                                       | CCDS33758.1     | chr3_49738947-49738949_TCT_  | 434VF>V | Deletion     | In-frame deletion    | 15% |
| MM20T | RNF151        | ring finger protein 151                                                       | NM_174903       | chr16_2018823-2018824_CT_    | NA      | Deletion     | Frameshift           | 12% |
| MM20T | RNF43         | ring finger protein 43                                                        | CCDS11607.1     | chr17_56434876-56434876_C_T  | 754G>D  | Substitution | Nonsynonymous coding | 31% |
| MM20T | RNF43         | ring finger protein 43                                                        | CCDS11607.1     | chr17_56437543-56437543_G_A  | 307R>W  | Substitution | Nonsynonymous coding | 24% |
| MM20T | RP11-108K14.4 | Putative scavenger receptor cysteine-rich domain-containing protein LOC619207 | ENST00000333815 | chr10_135273327-135273327__C | NA      | Insertion    | Frameshift           | 21% |
| MM20T | RP11-218M22.1 | -                                                                             | ENST00000318291 | chr12_752463-752464_CT_      | NA      | Deletion     | Frameshift           | 20% |
| MM20T | RP11-394B2.4  | -                                                                             | ENST00000398177 | chr16_70795058-70795058_C_T  | 43P>L   | Substitution | Nonsynonymous coding | 25% |
| MM20T | RP11-863K10.7 | Uncharacterized protein<br>[Source:UniProtKB/TrEMBL;Acc:B7WP66]               | ENST00000330539 | chr8_37593487-37593488_AA_   | NA      | Deletion     | Frameshift           | 33% |
| MM20T | RP111         | retinitis pigmentosa 1-like 1                                                 | CCDS43708.1     | chr8_10470791-10470791_G_A   | 273R>W  | Substitution | Nonsynonymous coding | 29% |

|       |         |                                                                                 |             |                               |         |              |                      |     |
|-------|---------|---------------------------------------------------------------------------------|-------------|-------------------------------|---------|--------------|----------------------|-----|
| MM20T | RPL22   | ribosomal protein L22                                                           | CCDS58.1    | chr1_6257785-6257785_T_       | NA      | Deletion     | Frameshift           | 40% |
| MM20T | RPS27L  | ribosomal protein S27-like                                                      | CCDS42048.1 | chr15_63447933-63447934_AA_   | NA      | Deletion     | Splice site acceptor | 30% |
| MM20T | RPTOR   | regulatory associated protein of MTOR, complex 1                                | CCDS11773.1 | chr17_78936278-78936278_G_A   | 1237R>H | Substitution | Nonsynonymous coding | 17% |
| MM20T | RSPH4A  | radial spoke head 4 homolog A (Chlamydomonas)                                   | CCDS34521.1 | chr6_116950758-116950758_A_   | NA      | Deletion     | Frameshift           | 19% |
| MM20T | RTKN2   | rhotekin 2                                                                      | CCDS7263.1  | chr10_63977012-63977015_AAAA_ | NA      | Deletion     | Splice site acceptor | 14% |
| MM20T | RTTN    | rotatin                                                                         | CCDS42443.1 | chr18_67742656-67742656_A_C   | 1499L>R | Substitution | Nonsynonymous coding | 26% |
| MM20T | RWDD4   | RWD domain containing 4                                                         | NM_152682   | chr4_184562626-184562626_A_   | NA      | Deletion     | Splice site acceptor | 23% |
| MM20T | S1PR3   | sphingosine-1-phosphate receptor 3                                              | CCDS6680.1  | chr9_91617181-91617181_C      | NA      | Insertion    | Frameshift           | 13% |
| MM20T | SAFB    | scaffold attachment factor B                                                    | CCDS12142.1 | chr19_5667372-5667372_G_      | NA      | Deletion     | Frameshift           | 18% |
| MM20T | SAFB2   | scaffold attachment factor B2                                                   | CCDS32879.1 | chr19_5590343-5590343_C_      | NA      | Deletion     | Frameshift           | 33% |
| MM20T | SALL1   | sal-like 1 (Drosophila)                                                         | CCDS10747.1 | chr16_51171279-51171279_G_T   | 1240A>E | Substitution | Nonsynonymous coding | 24% |
| MM20T | SAMD9L  | sterile alpha motif domain containing 9-like                                    | CCDS34681.1 | chr7_92760714-92760714_C_T    | 1524R>H | Substitution | Nonsynonymous coding | 25% |
| MM20T | SARDH   | sarcosine dehydrogenase                                                         | CCDS6978.1  | chr9_136570111-136570111_A_G  | 505W>R  | Substitution | Nonsynonymous coding | 29% |
| MM20T | SASH1   | SAM and SH3 domain containing 1                                                 | CCDS5212.1  | chr6_148865256-148865256_C_T  | 884Q>X  | Substitution | Nonsense             | 24% |
| MM20T | SATB1   | SATB homeobox 1                                                                 | CCDS2631.1  | chr3_18427938-18427938_T_C    | 458M>V  | Substitution | Nonsynonymous coding | 19% |
| MM20T | SATB2   | SATB homeobox 2                                                                 | CCDS2327.1  | chr2_200233434-200233434_A_   | NA      | Deletion     | Splice site acceptor | 30% |
| MM20T | SCEL    | sciellin                                                                        | CCDS9459.1  | chr13_78176786-78176786_A_T   | NA      | Substitution | Splice site acceptor | 13% |
| MM20T | SCML1   | sex comb on midleg-like 1 (Drosophila)                                          | CCDS35210.1 | chrX_17768306-17768306_A_G    | 199D>G  | Substitution | Nonsynonymous coding | 28% |
| MM20T | SCNN1G  | sodium channel, non-voltage-gated 1, gamma subunit                              | CCDS10608.1 | chr16_23226095-23226095_G_A   | 519S>N  | Substitution | Nonsynonymous coding | 35% |
| MM20T | SCRIB   | scribbled homolog (Drosophila)                                                  | CCDS6412.1  | chr8_144887374-144887374_G_A  | 860R>C  | Substitution | Nonsynonymous coding | 35% |
| MM20T | SCYL1   | SCY1-like 1 (S. cerevisiae)                                                     | CCDS41672.1 | chr11_65305796-65305796_G_A   | NA      | Substitution | Splice site donor    | 28% |
| MM20T | SDPR    | serum deprivation response                                                      | CCDS2313.1  | chr2_192711219-192711219_T_C  | 145N>D  | Substitution | Nonsynonymous coding | 14% |
| MM20T | SEC24D  | SEC24 family, member D (S. cerevisiae)                                          | CCDS3710.1  | chr4_119666218-119666219_AA_  | NA      | Deletion     | Splice site acceptor | 13% |
| MM20T | SEC24D  | SEC24 family, member D (S. cerevisiae)                                          | CCDS3710.1  | chr4_119666218-119666220_AAA_ | NA      | Deletion     | Splice site acceptor | 19% |
| MM20T | SEC31A  | SEC31 homolog A (S. cerevisiae)                                                 | CCDS3596.1  | chr4_83785565-83785565_T_     | NA      | Deletion     | Frameshift           | 20% |
| MM20T | SEL1L3  | sel-1 suppressor of lin-12-like 3 (C. elegans)                                  | CCDS47037.1 | chr4_25849258-25849258_T_     | NA      | Deletion     | Frameshift           | 23% |
| MM20T | SEMA4C  | sema domain, immunoglobulin domain (Ig), transmembrane domain (TM) and short    | CCDS2029.1  | chr2_97530040-97530040_A_G    | 348Y>H  | Substitution | Nonsynonymous coding | 14% |
| MM20T | SEMA6C  | sema domain, transmembrane domain (TM), and cytoplasmic domain, (semaphorin) 6C | CCDS984.1   | chr1_151109551-151109551_C_T  | ISV-1>  | Substitution | Splice site acceptor | 11% |
| MM20T | SERINC2 | serine incorporator 2                                                           | CCDS30662.1 | chr1_31899504-31899506_TCT_   | 205LF>L | Deletion     | In-frame deletion    | 15% |
| MM20T | SETD2   | SET domain containing 2                                                         | CCDS2749.2  | chr3_47098957-47098957_T      | NA      | Insertion    | Frameshift           | 22% |
| MM20T | SEZ6L2  | seizure related 6 homolog (mouse)-like 2                                        | CCDS10659.1 | chr16_29908311-29908311_C_    | NA      | Deletion     | Frameshift           | 22% |
| MM20T | SFMBT2  | Scm-like with four mbt domains 2                                                | CCDS31138.1 | chr10_7213936-7213936_C_T     | 779R>Q  | Substitution | Nonsynonymous coding | 12% |

|       |          |                                                                                                                                                                              |                 |                               |          |              |                      |     |
|-------|----------|------------------------------------------------------------------------------------------------------------------------------------------------------------------------------|-----------------|-------------------------------|----------|--------------|----------------------|-----|
| MM20T | SFMBT2   | Scm-like with four mbt domains 2                                                                                                                                             | CCDS31138.1     | chr10_7269836-7269836_G_T     | 395P>H   | Substitution | Nonsynonymous coding | 20% |
| MM20T | SH2B2    | SH2B adaptor protein 2                                                                                                                                                       | ENST00000306803 | chr7_101960949-101960949_G_A  | 515R>Q   | Substitution | Nonsynonymous coding | 30% |
| MM20T | SH2D3C   | SH2 domain containing 3C                                                                                                                                                     | ENST00000373276 | chr9_130529338-130529338_C    | NA       | Insertion    | Frameshift           | 12% |
| MM20T | SH3BP2   | SH3-domain binding protein 2                                                                                                                                                 | CCDS33944.1     | chr4_2833684-2833684_C_T      | 462T>M   | Substitution | Nonsynonymous coding | 15% |
| MM20T | SH3PXD2A | SH3 and PX domains 2A                                                                                                                                                        | CCDS31278.1     | chr10_105362235-105362235_C_T | 886A>T   | Substitution | Nonsynonymous coding | 33% |
| MM20T | SHANK2   | SH3 and multiple ankyrin repeat domains 2                                                                                                                                    | NM_133266       | chr11_70338547-70338547_C_A   | 190A>S   | Substitution | Nonsynonymous coding | 10% |
| MM20T | SHROOM2  | shroom family member 2                                                                                                                                                       | CCDS14135.1     | chrX_9863365-9863365_G_A      | 473G>S   | Substitution | Nonsynonymous coding | 13% |
| MM20T | SIK3     | SIK family kinase 3                                                                                                                                                          | CCDS8379.1      | chr11_116732069-116732069_G_  | NA       | Deletion     | Frameshift           | 12% |
| MM20T | SKA3     | spindle and kinetochore associated complex subunit 3                                                                                                                         | CCDS31946.1     | chr13_21729953-21729953_A     | NA       | Insertion    | Splice site acceptor | 15% |
| MM20T | SKIV2L   | superkiller viralicidic activity 2-like (S. cerevisiae)                                                                                                                      | CCDS4731.1      | chr6_31934881-31934881_G_     | NA       | Deletion     | Frameshift           | 15% |
| MM20T | SLC16A9  | solute carrier family 16, member 9 (monocarboxylic acid transporter 9)                                                                                                       | CCDS7256.1      | chr10_61414073-61414073_T_    | NA       | Deletion     | Frameshift           | 17% |
| MM20T | SLC1A6   | solute carrier family 1 (high affinity aspartate/glutamate transporter), member 6                                                                                            | CCDS12321.1     | chr19_15083617-15083617_G_A   | 36R>C    | Substitution | Nonsynonymous coding | 29% |
| MM20T | SLC22A14 | solute carrier family 22, member 14                                                                                                                                          | CCDS2677.1      | chr3_38347750-38347750_T_C    | 78I>T    | Substitution | Nonsynonymous coding | 20% |
| MM20T | SLC22A18 | solute carrier family 22, member 18                                                                                                                                          | CCDS7740.1      | chr11_2946305-2946305_G_A     | 385G>S   | Substitution | Nonsynonymous coding | 11% |
| MM20T | SLC22A8  | solute carrier family 22 (organic anion transporter), member 8                                                                                                               | CCDS8042.1      | chr11_62782241-62782241_T_C   | 64M>V    | Substitution | Nonsynonymous coding | 13% |
| MM20T | SLC25A36 | solute carrier family 25 (pyrimidine nucleotide carrier ), member 36                                                                                                         | CCDS46927.1     | chr3_140678385-140678387_AAA_ | NA       | Deletion     | Splice site donor    | 28% |
| MM20T | SLC35F2  | solute carrier family 35, member F2                                                                                                                                          | CCDS41709.1     | chr11_107673779-107673779_A_G | 296L>P   | Substitution | Nonsynonymous coding | 17% |
| MM20T | SLC35F5  | solute carrier family 35, member F5                                                                                                                                          | CCDS2119.1      | chr2_114500277-114500278_AA_  | NA       | Deletion     | Frameshift           | 18% |
| MM20T | SLC35G2  | solute carrier family 35, member G2                                                                                                                                          | CCDS3091.1      | chr3_136573486-136573486_A_   | NA       | Deletion     | Frameshift           | 23% |
| MM20T | SLC3A1   | solute carrier family 3 (cystine, dibasic and neutral amino acid transporters, activator of solute carrier family 4, anion exchanger, member 2 (erythrocyte membrane protein | CCDS1819.1      | chr2_44547362-44547362_G_A    | 548A>T   | Substitution | Nonsynonymous coding | 19% |
| MM20T | SLC4A2   | solute carrier family 4, anion exchanger, member 2 (erythrocyte membrane protein                                                                                             | CCDS5917.1      | chr7_150772554-150772556_AGG_ | 1087KE>K | Deletion     | In-frame deletion    | 12% |
| MM20T | SLC4A7   | solute carrier family 4, sodium bicarbonate cotransporter, member 7                                                                                                          | CCDS33721.1     | chr3_27478898-27478898_C_T    | 128E>K   | Substitution | Nonsynonymous coding | 14% |
| MM20T | SLC4A9   | solute carrier family 4, sodium bicarbonate cotransporter, member 9                                                                                                          | CCDS47278.1     | chr5_139747020-139747020_C_T  | 677R>C   | Substitution | Nonsynonymous coding | 36% |
| MM20T | SLC6A3   | solute carrier family 6 (neurotransmitter transporter, dopamine), member 3                                                                                                   | CCDS3863.1      | chr5_1411468-1411468_G_T      | 387P>T   | Substitution | Nonsynonymous coding | 13% |
| MM20T | SLC6A6   | solute carrier family 6 (neurotransmitter transporter, taurine), member 6                                                                                                    | ENST00000428884 | chr3_14485478-14485478_C_     | NA       | Deletion     | Frameshift           | 25% |
| MM20T | SLC6A6   | solute carrier family 6 (neurotransmitter transporter, taurine), member 6                                                                                                    | CCDS33705.1     | chr3_14523294-14523294_G_A    | 556C>Y   | Substitution | Nonsynonymous coding | 21% |
| MM20T | SLC7A11  | solute carrier family 7 (anionic amino acid transporter light chain, xc- system), member                                                                                     | CCDS3742.1      | chr4_139153539-139153539_A_   | NA       | Deletion     | Splice site acceptor | 19% |
| MM20T | SLC9B2   | solute carrier family 9, subfamily B (NHA2, cation proton antiporter 2), member 2                                                                                            | CCDS3662.1      | chr4_103947717-103947717_G_A  | 475A>V   | Substitution | Nonsynonymous coding | 18% |
| MM20T | SLIT3    | slit homolog 3 (Drosophila)                                                                                                                                                  | CCDS4369.1      | chr5_168189682-168189682_T_C  | 491Y>C   | Substitution | Nonsynonymous coding | 16% |
| MM20T | SMARCC1  | SWI/SNF related, matrix associated, actin dependent regulator of chromatin, subfamily c,                                                                                     | CCDS2758.1      | chr3_47779603-47779603_A_     | NA       | Deletion     | Splice site acceptor | 20% |
| MM20T | SMARCD2  | SWI/SNF related, matrix associated, actin dependent regulator of chromatin, subfamily                                                                                        | CCDS45756.1     | chr17_61911057-61911059_TCT_  | 402KT>T  | Deletion     | In-frame deletion    | 17% |
| MM20T | SMPD3    | sphingomyelin phosphodiesterase 3, neutral membrane (neutral sphingomyelinase II)                                                                                            | CCDS10867.1     | chr16_68405594-68405594_C_T   | 164R>Q   | Substitution | Nonsynonymous coding | 33% |



|       |         |                                                                |                 |                                |         |              |                      |     |
|-------|---------|----------------------------------------------------------------|-----------------|--------------------------------|---------|--------------|----------------------|-----|
| MM20T | SMTN    | smoothenin                                                     | CCDS13887.1     | chr22_31487799-31487799__C     | NA      | Insertion    | Frameshift           | 12% |
| MM20T | SNRNP40 | small nuclear ribonucleoprotein 40kDa (U5)                     | ENST00000373720 | chr1_31742132-31742132_G_A     | 14P>L   | Substitution | Nonsynonymous coding | 26% |
| MM20T | SNX32   | sorting nexin 32                                               | CCDS8113.2      | chr11_65618804-65618804_G_T    | 239A>S  | Substitution | Nonsynonymous coding | 18% |
| MM20T | SOCS2   | suppressor of cytokine signaling 2                             | CCDS9047.1      | chr12_93966776-93966776_C_T    | 35R>C   | Substitution | Nonsynonymous coding | 28% |
| MM20T | SOGA2   | SOGA family member 2                                           | CCDS11841.1     | chr18_8793004-8793004_C_       | NA      | Deletion     | Frameshift           | 19% |
| MM20T | SOGA2   | SOGA family member 2                                           | CCDS11841.1     | chr18_8826036-8826036_G_A      | 1510E>K | Substitution | Nonsynonymous coding | 24% |
| MM20T | SOGA3   | SOGA family member 3                                           | CCDS43505.1     | chr6_127837038-127837038_C_    | NA      | Deletion     | Frameshift           | 19% |
| MM20T | SORBS2  | sorbin and SH3 domain containing 2                             | CCDS3845.1      | chr4_186548087-186548087_G_A   | 274A>V  | Substitution | Nonsynonymous coding | 12% |
| MM20T | SOS2    | son of sevenless homolog 2 (Drosophila)                        | CCDS9697.1      | chr14_50585575-50585575_A_     | NA      | Deletion     | Splice site acceptor | 23% |
| MM20T | SOX3    | SRY (sex determining region Y)-box 3                           | CCDS14669.1     | chrX_139586813-139586813_C_T   | 138R>H  | Substitution | Nonsynonymous coding | 26% |
| MM20T | SP100   | SP100 nuclear antigen                                          | ENST00000341950 | chr2_231334496-231334496_A_    | NA      | Deletion     | Frameshift           | 10% |
| MM20T | SPARC   | secreted protein, acidic, cysteine-rich (osteonectin)          | CCDS4318.1      | chr5_151046003-151046003_C_T   | 218R>Q  | Substitution | Nonsynonymous coding | 33% |
| MM20T | SPECC1  | sperm antigen with calponin homology and coiled-coil domains 1 | CCDS32590.1     | chr17_20108263-20108263_A_     | NA      | Deletion     | Frameshift           | 17% |
| MM20T | SPEF2   | sperm flagellar 2                                              | CCDS43309.1     | chr5_35771804-35771804__A      | NA      | Insertion    | Frameshift           | 17% |
| MM20T | SPEG    | SPEG complex locus                                             | CCDS42824.1     | chr2_220347922-220347922_C_    | NA      | Deletion     | Frameshift           | 14% |
| MM20T | SPEG    | SPEG complex locus                                             | CCDS42824.1     | chr2_220338454-220338454_C_T   | 1426R>X | Substitution | Nonsense             | 22% |
| MM20T | SPEN    | spen homolog, transcriptional regulator (Drosophila)           | CCDS164.1       | chr1_16260510-16260510_A_G     | 2592N>S | Substitution | Nonsynonymous coding | 24% |
| MM20T | SPTBN5  | spectrin, beta, non-erythrocytic 5                             | NM_016642       | chr15_42174886-42174886_C_T    | 613C>Y  | Substitution | Nonsynonymous coding | 13% |
| MM20T | SPTLC1  | serine palmitoyltransferase, long chain base subunit 1         | CCDS6692.1      | chr9_94843181-94843181_G_T     | 109L>I  | Substitution | Nonsynonymous coding | 14% |
| MM20T | SQLE    | squalene epoxidase                                             | CCDS47918.1     | chr8_126030937-126030937_A_G   | 471Q>R  | Substitution | Nonsynonymous coding | 19% |
| MM20T | SRP54   | signal recognition particle 54kDa                              | CCDS9652.1      | chr14_35476527-35476527_A_C    | 98K>N   | Substitution | Nonsynonymous coding | 23% |
| MM20T | SRP68   | signal recognition particle 68kDa                              | CCDS11738.1     | chr17_74056447-74056447_A_C    | 260L>R  | Substitution | Nonsynonymous coding | 17% |
| MM20T | SRPK1   | SRSF protein kinase 1                                          | CCDS47415.1     | chr6_35842020-35842020_A_T     | 192I>N  | Substitution | Nonsynonymous coding | 15% |
| MM20T | SRSF2   | serine/arginine-rich splicing factor 2                         | CCDS11749.1     | chr17_74732956-74732956_G_     | NA      | Deletion     | Frameshift           | 26% |
| MM20T | SSPO    | SCO-spondin homolog (Bos taurus)                               | ENST00000262089 | chr7_149492780-149492780_G_A   | 1231G>D | Substitution | Nonsynonymous coding | 15% |
| MM20T | ST6GAL1 | ST6 beta-galactosamide alpha-2,6-sialyltransferase 1           | CCDS3285.1      | chr3_186760538-186760541_TCTT_ | NA      | Deletion     | Frameshift           | 13% |
| MM20T | STAT4   | signal transducer and activator of transcription 4             | CCDS2310.1      | chr2_191941054-191941054_G_A   | NA      | Substitution | Splice site acceptor | 15% |
| MM20T | STEAP3  | STEAP family member 3, metalloreductase                        | CCDS42738.1     | chr2_120012419-120012419_G_A   | 404V>I  | Substitution | Nonsynonymous coding | 11% |
| MM20T | STEAP4  | STEAP family member 4                                          | CCDS43611.1     | chr7_87908729-87908729_C_T     | 455R>K  | Substitution | Nonsynonymous coding | 23% |
| MM20T | STK32A  | serine/threonine kinase 32A                                    | CCDS47299.1     | chr5_146658879-146658879_G_A   | 60V>M   | Substitution | Nonsynonymous coding | 19% |
| MM20T | SUSD1   | sushi domain containing 1                                      | CCDS6783.1      | chr9_114886681-114886681_C_T   | 248A>T  | Substitution | Nonsynonymous coding | 14% |
| MM20T | SUSD4   | sushi domain containing 4                                      | CCDS41471.1     | chr1_223465946-223465946_C_A   | 66G>C   | Substitution | Nonsynonymous coding | 17% |

|       |         |                                                                                 |                 |                              |         |              |                      |     |
|-------|---------|---------------------------------------------------------------------------------|-----------------|------------------------------|---------|--------------|----------------------|-----|
| MM20T | SUSD4   | sushi domain containing 4                                                       | ENST00000342943 | chr1_223532419-223532419_A_G | 101I>T  | Substitution | Nonsynonymous coding | 43% |
| MM20T | SVEP1   | sushi, von Willebrand factor type A, EGF and pentraxin domain containing 1      | CCDS48004.1     | chr9_113208154-113208154_C_T | 1476G>S | Substitution | Nonsynonymous coding | 16% |
| MM20T | SVEP1   | sushi, von Willebrand factor type A, EGF and pentraxin domain containing 1      | CCDS48004.1     | chr9_113233653-113233653_G_A | 997R>C  | Substitution | Nonsynonymous coding | 28% |
| MM20T | SYNE2   | spectrin repeat containing, nuclear envelope 2                                  | CCDS9761.2      | chr14_64612864-64612864_G_A  | 5188A>T | Substitution | Nonsynonymous coding | 21% |
| MM20T | SYVN1   | synovial apoptosis inhibitor 1, synoviolin                                      | CCDS31605.1     | chr11_64897391-64897392_GA_  | NA      | Deletion     | Splice site acceptor | 20% |
| MM20T | TAMM41  | TAM41, mitochondrial translocator assembly and maintenance protein, homolog (S. | CCDS2607.1      | chr3_11871187-11871187_C_T   | NA      | Substitution | Splice site donor    | 11% |
| MM20T | TANC2   | tetratricopeptide repeat, ankyrin repeat and coiled-coil containing 2           | CCDS45754.1     | chr17_61499237-61499237_G_T  | 1965R>M | Substitution | Nonsynonymous coding | 15% |
| MM20T | TAPT1   | transmembrane anterior posterior transformation 1                               | CCDS47030.1     | chr4_16189981-16189982_AA_   | NA      | Deletion     | Splice site acceptor | 19% |
| MM20T | TAPT1   | transmembrane anterior posterior transformation 1                               | CCDS47030.1     | chr4_16189981-16189981_A_    | NA      | Deletion     | Splice site acceptor | 21% |
| MM20T | TAS2R10 | taste receptor, type 2, member 10                                               | CCDS8634.1      | chr12_10978426-10978426_G_A  | 148A>V  | Substitution | Nonsynonymous coding | 32% |
| MM20T | TBC1D5  | TBC1 domain family, member 5                                                    | CCDS46770.1     | chr3_17300086-17300086_A_    | NA      | Deletion     | Splice site acceptor | 17% |
| MM20T | TBCCD1  | TBCC domain containing 1                                                        | CCDS3276.1      | chr3_186274567-186274567_A_  | NA      | Deletion     | Splice site acceptor | 21% |
| MM20T | TCF25   | transcription factor 25 (basic helix-loop-helix)                                | ENST00000263347 | chr16_89975423-89975423_G_A  | 382V>I  | Substitution | Nonsynonymous coding | 22% |
| MM20T | TCF3    | transcription factor 3 (E2A immunoglobulin enhancer binding factors E12/E47)    | CCDS45899.1     | chr19_1612359-1612359_G_A    | 554R>W  | Substitution | Nonsynonymous coding | 15% |
| MM20T | TCF4    | transcription factor 4                                                          | CCDS42438.1     | chr18_52946800-52946800_T_C  | 213S>G  | Substitution | Nonsynonymous coding | 24% |
| MM20T | TEAD2   | TEA domain family member 2                                                      | CCDS12761.1     | chr19_49850473-49850473_G_   | NA      | Deletion     | Frameshift           | 23% |
| MM20T | TELO2   | TEL2, telomere maintenance 2, homolog (S. cerevisiae)                           | CCDS32363.1     | chr16_1551502-1551502_T_C    | NA      | Substitution | Splice site donor    | 16% |
| MM20T | TENM3   | teneurin transmembrane protein 3                                                | CCDS47165.1     | chr4_183676190-183676190_C_T | 1557T>I | Substitution | Nonsynonymous coding | 19% |
| MM20T | TEP1    | telomerase-associated protein 1                                                 | CCDS9548.1      | chr14_20841719-20841719_G_T  | 2210L>M | Substitution | Nonsynonymous coding | 14% |
| MM20T | TERT    | telomerase reverse transcriptase                                                | CCDS3861.2      | chr5_1294207-1294207_G_A     | 265P>L  | Substitution | Nonsynonymous coding | 21% |
| MM20T | TET1    | tet methylcytosine dioxygenase 1                                                | CCDS7281.1      | chr10_70332153-70332153_A_   | NA      | Deletion     | Frameshift           | 26% |
| MM20T | TET3    | tet methylcytosine dioxygenase 3                                                | CCDS46339.1     | chr2_74328416-74328416_G_A   | 1366A>T | Substitution | Nonsynonymous coding | 28% |
| MM20T | TEX11   | testis expressed 11                                                             | CCDS35323.1     | chrX_69898743-69898745_AAA_  | NA      | Deletion     | Splice site acceptor | 14% |
| MM20T | TEX13A  | testis expressed 13A                                                            | ENST00000413579 | chrX_104464991-104464991_C_A | 31G>C   | Substitution | Nonsynonymous coding | 19% |
| MM20T | TEX15   | testis expressed 15                                                             | CCDS6080.1      | chr8_30703647-30703647_G_A   | 963R>X  | Substitution | Nonsense             | 22% |
| MM20T | TFAP2B  | transcription factor AP-2 beta (activating enhancer binding protein 2 beta)     | CCDS4934.2      | chr6_50796386-50796386_A_    | NA      | Deletion     | Frameshift           | 14% |
| MM20T | TFEC    | transcription factor EC                                                         | CCDS5762.1      | chr7_115594657-115594657_T_  | NA      | Deletion     | Frameshift           | 12% |
| MM20T | THADA   | thyroid adenoma associated                                                      | CCDS46268.1     | chr2_43793834-43793834_T_G   | NA      | Substitution | Splice site donor    | 18% |
| MM20T | THOC2   | THO complex 2                                                                   | CCDS43988.1     | chrX_122757087-122757087_T_  | NA      | Deletion     | Frameshift           | 16% |
| MM20T | TIAM2   | T-cell lymphoma invasion and metastasis 2                                       | CCDS34558.1     | chr6_155450468-155450469_AA_ | NA      | Deletion     | Frameshift           | 16% |
| MM20T | TLE1    | transducin-like enhancer of split 1 (E(sp1) homolog, Drosophila)                | CCDS6661.1      | chr9_84225192-84225192_G_    | NA      | Deletion     | Frameshift           | 15% |
| MM20T | TLE3    | transducin-like enhancer of split 3 (E(sp1) homolog, Drosophila)                | CCDS45293.1     | chr15_70347635-70347635_G_A  | 447A>V  | Substitution | Nonsynonymous coding | 13% |

|       |          |                                                                     |                 |                                |         |              |                      |     |
|-------|----------|---------------------------------------------------------------------|-----------------|--------------------------------|---------|--------------|----------------------|-----|
| MM20T | TLN1     | talin 1                                                             | CCDS35009.1     | chr9_35715147-35715147_T_C     | 888Q>R  | Substitution | Nonsynonymous coding | 12% |
| MM20T | TM2D3    | TM2 domain containing 3                                             | CCDS10393.1     | chr15_102185369-102185369_A_   | NA      | Deletion     | Splice site acceptor | 21% |
| MM20T | TM7SF3   | transmembrane 7 superfamily member 3                                | CCDS8710.1      | chr12_27129269-27129269_T_C    | 404D>G  | Substitution | Nonsynonymous coding | 20% |
| MM20T | TM9SF3   | transmembrane 9 superfamily member 3                                | CCDS7450.1      | chr10_98307736-98307736_T_A    | 324M>L  | Substitution | Nonsynonymous coding | 22% |
| MM20T | TMEM132D | transmembrane protein 132D                                          | CCDS9266.1      | chr12_129569138-129569138_G_A  | 518T>M  | Substitution | Nonsynonymous coding | 24% |
| MM20T | TMEM132E | transmembrane protein 132E                                          | CCDS11283.1     | chr17_32964853-32964853_C_T    | 853P>S  | Substitution | Nonsynonymous coding | 15% |
| MM20T | TMEM147  | transmembrane protein 147                                           | CCDS12466.1     | chr19_36037438-36037438_T_C    | 53L>S   | Substitution | Nonsynonymous coding | 13% |
| MM20T | TMEM18   | transmembrane protein 18                                            | CCDS33141.1     | chr2_672829-672829_T_C         | 71E>G   | Substitution | Nonsynonymous coding | 20% |
| MM20T | TMEM204  | transmembrane protein 204                                           | CCDS42098.1     | chr16_1604942-1604942_C_       | NA      | Deletion     | Frameshift           | 17% |
| MM20T | TMEM259  | transmembrane protein 259                                           | CCDS32862.1     | chr19_1010479-1010479_T_C      | 578H>R  | Substitution | Nonsynonymous coding | 22% |
| MM20T | TMEM38A  | transmembrane protein 38A                                           | CCDS12349.1     | chr19_16797219-16797219_A_G    | NA      | Substitution | Splice site donor    | 14% |
| MM20T | TMEM60   | transmembrane protein 60                                            | CCDS5593.1      | chr7_77423460-77423460_T_      | NA      | Deletion     | Frameshift           | 18% |
| MM20T | TMPO     | thymopoietin                                                        | CCDS9064.1      | chr12_98927240-98927240_C_A    | 402P>Q  | Substitution | Nonsynonymous coding | 20% |
| MM20T | TMX4     | thioredoxin-related transmembrane protein 4                         | CCDS13101.1     | chr20_7976722-7976722_A_       | NA      | Deletion     | Splice site acceptor | 22% |
| MM20T | TNKS2    | tankyrase, TRF1-interacting ankyrin-related ADP-ribose polymerase 2 | CCDS7417.1      | chr10_93601946-93601946_A_     | NA      | Deletion     | Frameshift           | 20% |
| MM20T | TNRC18   | trinucleotide repeat containing 18                                  | CCDS47534.1     | chr7_5401259-5401259_G_        | NA      | Deletion     | Frameshift           | 29% |
| MM20T | TNRC6C   | trinucleotide repeat containing 6C                                  | CCDS45799.1     | chr17_76071270-76071270_G_A    | 988D>N  | Substitution | Nonsynonymous coding | 19% |
| MM20T | TOPAZ1   | testis and ovary specific PAZ domain containing 1                   | CCDS46809.1     | chr3_44285883-44285883_A_      | NA      | Deletion     | Frameshift           | 16% |
| MM20T | TP53     | tumor protein p53                                                   | CCDS11118.1     | chr17_7578403-7578403_C_T      | 176C>Y  | Substitution | Nonsynonymous coding | 13% |
| MM20T | TP53BP1  | tumor protein p53 binding protein 1                                 | CCDS45250.1     | chr15_43748661-43748661__T     | NA      | Insertion    | Frameshift           | 19% |
| MM20T | TRAK2    | trafficking protein, kinesin binding 2                              | CCDS2347.1      | chr2_202245945-202245949_AAAA_ | NA      | Deletion     | Splice site acceptor | 11% |
| MM20T | TRIM16   | tripartite motif containing 16                                      | ENST00000261644 | chr17_15517061-15517061_A_     | NA      | Deletion     | Frameshift           | 17% |
| MM20T | TRIM8    | tripartite motif containing 8                                       | CCDS31274.1     | chr10_104416953-104416953_C_T  | 500Q>X  | Substitution | Nonsense             | 18% |
| MM20T | TRIO     | trio Rho guanine nucleotide exchange factor                         | CCDS3883.1      | chr5_14487781-14487781_C_      | NA      | Deletion     | Frameshift           | 13% |
| MM20T | TRMT5    | tRNA methyltransferase 5 homolog (S. cerevisiae)                    | CCDS32092.1     | chr14_61441850-61441850_T_     | NA      | Deletion     | Frameshift           | 19% |
| MM20T | TRPC4    | transient receptor potential cation channel, subfamily C, member 4  | CCDS45037.1     | chr13_38320595-38320597_AAA_   | NA      | Deletion     | Splice site acceptor | 44% |
| MM20T | TRPM3    | transient receptor potential cation channel, subfamily M, member 3  | CCDS43835.1     | chr9_73151102-73151102_T_C     | 1631K>E | Substitution | Nonsynonymous coding | 20% |
| MM20T | TRPM3    | transient receptor potential cation channel, subfamily M, member 3  | CCDS43835.1     | chr9_73458046-73458047_AA_     | NA      | Deletion     | Splice site acceptor | 25% |
| MM20T | TRPM3    | transient receptor potential cation channel, subfamily M, member 3  | CCDS43835.1     | chr9_73458046-73458046_A_      | NA      | Deletion     | Splice site acceptor | 17% |
| MM20T | TRPM5    | transient receptor potential cation channel, subfamily M, member 5  | CCDS31340.1     | chr11_2441463-2441463_G_A      | 213A>V  | Substitution | Nonsynonymous coding | 24% |
| MM20T | TRPM7    | transient receptor potential cation channel, subfamily M, member 7  | CCDS42035.1     | chr15_50904881-50904881_C_T    | 639R>H  | Substitution | Nonsynonymous coding | 27% |
| MM20T | TRRAP    | transformation/transcription domain-associated protein              | CCDS5659.1      | chr7_98602803-98602803_C_T     | 3486R>W | Substitution | Nonsynonymous coding | 17% |

|       |        |                                                                  |                 |                              |         |              |                      |     |
|-------|--------|------------------------------------------------------------------|-----------------|------------------------------|---------|--------------|----------------------|-----|
| MM20T | TSHZ3  | teashirt zinc finger homeobox 3                                  | CCDS12421.2     | chr19_31767826-31767826_C_T  | 958R>Q  | Substitution | Nonsynonymous coding | 24% |
| MM20T | TSR3   | TSR3, 20S rRNA accumulation, homolog (S. cerevisiae)             | CCDS10435.1     | chr16_1401501-1401501_G_     | NA      | Deletion     | Frameshift           | 21% |
| MM20T | TTBK1  | tau tubulin kinase 1                                             | CCDS34455.1     | chr6_43222785-43222785_A_G   | NA      | Substitution | Splice site acceptor | 13% |
| MM20T | TTL5   | tubulin tyrosine ligase-like family, member 5                    | CCDS32124.1     | chr14_76248853-76248853_G_T  | 847E>X  | Substitution | Nonsense             | 19% |
| MM20T | TTN    | titin                                                            | NM_133379       | chr2_179635342-179635342_A_  | NA      | Deletion     | Frameshift           | 13% |
| MM20T | TULP4  | tubby like protein 4                                             | CCDS34561.1     | chr6_158900957-158900957_C   | NA      | Insertion    | Frameshift           | 12% |
| MM20T | TVP23A | trans-golgi network vesicle protein 23 homolog A (S. cerevisiae) | CCDS45408.1     | chr16_10867203-10867203_A_   | NA      | Deletion     | Frameshift           | 43% |
| MM20T | TXNDC9 | thioredoxin domain containing 9                                  | CCDS2044.1      | chr2_99936266-99936268_AAA_  | NA      | Deletion     | Splice site acceptor | 35% |
| MM20T | UBAP2  | ubiquitin associated protein 2                                   | CCDS6547.1      | chr9_33927049-33927049_C_    | NA      | Deletion     | Frameshift           | 19% |
| MM20T | UBE2E3 | ubiquitin-conjugating enzyme E2E 3                               | CCDS2282.1      | chr2_181922536-181922536_C_A | 121P>Q  | Substitution | Nonsynonymous coding | 19% |
| MM20T | UBR5   | ubiquitin protein ligase E3 component n-recognin 5               | CCDS34933.1     | chr8_103287851-103287852_AA_ | NA      | Deletion     | Splice site acceptor | 27% |
| MM20T | UFD1L  | ubiquitin fusion degradation 1 like (yeast)                      | CCDS13761.1     | chr22_19438242-19438242_G_C  | 292A>G  | Substitution | Nonsynonymous coding | 20% |
| MM20T | UFD1L  | ubiquitin fusion degradation 1 like (yeast)                      | CCDS13761.1     | chr22_19438243-19438243_C_A  | 292A>S  | Substitution | Nonsynonymous coding | 20% |
| MM20T | ULK4   | unc-51-like kinase 4 (C. elegans)                                | CCDS43071.1     | chr3_41860985-41860985_T_    | NA      | Deletion     | Frameshift           | 21% |
| MM20T | UNKL   | unkempt homolog (Drosophila)-like                                | CCDS32359.1     | chr16_1464643-1464643_G_     | NA      | Deletion     | Frameshift           | 14% |
| MM20T | UQCC   | ubiquinol-cytochrome c reductase complex chaperone               | CCDS13252.1     | chr20_33902510-33902510_G_A  | 211A>V  | Substitution | Nonsynonymous coding | 22% |
| MM20T | USP33  | ubiquitin specific peptidase 33                                  | CCDS678.1       | chr1_78201804-78201806_GAG_  | 161PL>L | Deletion     | In-frame deletion    | 19% |
| MM20T | USP35  | ubiquitin specific peptidase 35                                  | CCDS41693.1     | chr11_77911710-77911710_C_   | NA      | Deletion     | Frameshift           | 34% |
| MM20T | USP40  | ubiquitin specific peptidase 40                                  | CCDS46547.1     | chr2_234394237-234394237_T_  | NA      | Deletion     | Frameshift           | 23% |
| MM20T | USP9X  | ubiquitin specific peptidase 9, X-linked                         | CCDS43930.1     | chrX_40982957-40982957_C_    | NA      | Deletion     | Frameshift           | 43% |
| MM20T | UTP14A | UTP14, U3 small nucleolar ribonucleoprotein, homolog A (yeast)   | ENST00000371042 | chrX_129047356-129047356_A_  | NA      | Deletion     | Frameshift           | 18% |
| MM20T | UTP20  | UTP20, small subunit (SSU) processome component, homolog (yeast) | CCDS9081.1      | chr12_101679636-101679636_T_ | NA      | Deletion     | Frameshift           | 16% |
| MM20T | VAV1   | vav 1 guanine nucleotide exchange factor                         | CCDS12174.1     | chr19_6772872-6772872_G_     | NA      | Deletion     | Frameshift           | 31% |
| MM20T | VIT    | vitrin                                                           | CCDS33180.1     | chr2_37041349-37041349_G_A   | 643V>I  | Substitution | Nonsynonymous coding | 26% |
| MM20T | VPRBP  | Vpr (HIV-1) binding protein                                      | NM_014703       | chr3_51464965-51464965_C_T   | 516V>M  | Substitution | Nonsynonymous coding | 29% |
| MM20T | VPS13A | vacuolar protein sorting 13 homolog A (S. cerevisiae)            | CCDS6655.1      | chr9_79836123-79836123_G_A   | 338V>I  | Substitution | Nonsynonymous coding | 22% |
| MM20T | VPS35  | vacuolar protein sorting 35 homolog (S. cerevisiae)              | CCDS10721.1     | chr16_46708575-46708577_AAA_ | NA      | Deletion     | Splice site acceptor | 20% |
| MM20T | WASF3  | WAS protein family, member 3                                     | CCDS9318.1      | chr13_27255387-27255387_C_   | NA      | Deletion     | Frameshift           | 30% |
| MM20T | WDR6   | WD repeat domain 6                                               | CCDS2782.2      | chr3_49051382-49051382_G     | NA      | Insertion    | Frameshift           | 20% |
| MM20T | WDR81  | WD repeat domain 81                                              | NM_001163809    | chr17_1628400-1628400_G_     | NA      | Deletion     | Frameshift           | 20% |
| MM20T | WDR86  | WD repeat domain 86                                              | CCDS5925.2      | chr7_151082210-151082210_G_A | 276R>C  | Substitution | Nonsynonymous coding | 26% |
| MM20T | WDR96  | WD repeat domain 96                                              | CCDS31281.1     | chr10_105971879-105971879_A_ | NA      | Deletion     | Frameshift           | 15% |

|       |         |                                                              |                 |                               |         |              |                      |     |
|-------|---------|--------------------------------------------------------------|-----------------|-------------------------------|---------|--------------|----------------------|-----|
| MM20T | WDSUB1  | WD repeat, sterile alpha motif and U-box domain containing 1 | CCDS2208.1      | chr2_160092704-160092705_AA_  | NA      | Deletion     | Splice site acceptor | 22% |
| MM20T | WNK2    | WNK lysine deficient protein kinase 2                        | NM_006648       | chr9_96021610-96021610_C_     | NA      | Deletion     | Frameshift           | 21% |
| MM20T | WNK4    | WNK lysine deficient protein kinase 4                        | CCDS11439.1     | chr17_40939870-40939870_G_    | NA      | Deletion     | Frameshift           | 23% |
| MM20T | XPO5    | exportin 5                                                   | CCDS47430.1     | chr6_43521153-43521153_A_     | NA      | Deletion     | Frameshift           | 17% |
| MM20T | XXYL1   | xyloside xylosyltransferase 1                                | CCDS43188.1     | chr3_194877199-194877199_C_T  | 255R>Q  | Substitution | Nonsynonymous coding | 23% |
| MM20T | XYLT2   | xylosyltransferase II                                        | CCDS11563.1     | chr17_48433967-48433967_C_    | NA      | Deletion     | Frameshift           | 20% |
| MM20T | YBEY    | ybeY metalloproteinase (putative)                            | CCDS33591.1     | chr21_47707040-47707040_A_    | NA      | Deletion     | Splice site donor    | 19% |
| MM20T | YIPF2   | Yip1 domain family, member 2                                 | CCDS12251.1     | chr19_11034678-11034678_G_    | NA      | Insertion    | Splice site acceptor | 16% |
| MM20T | YIPF7   | Yip1 domain family, member 7                                 | NM_182592       | chr4_44631449-44631449_A_     | NA      | Insertion    | Frameshift           | 23% |
| MM20T | YRDC    | yrdC domain containing (E. coli)                             | CCDS30675.1     | chr1_38273537-38273537_C_T    | 106V>M  | Substitution | Nonsynonymous coding | 14% |
| MM20T | ZBTB14  | zinc finger and BTB domain containing 14                     | CCDS11837.1     | chr18_5292029-5292029_A_G     | 60Y>H   | Substitution | Nonsynonymous coding | 26% |
| MM20T | ZC3H8   | zinc finger CCCH-type containing 8                           | CCDS46392.1     | chr2_112996041-112996041_T_C  | 74D>G   | Substitution | Nonsynonymous coding | 28% |
| MM20T | ZDBF2   | zinc finger, DBF-type containing 2                           | CCDS46501.1     | chr2_207174428-207174428_A_   | NA      | Deletion     | Frameshift           | 47% |
| MM20T | ZDHHC13 | zinc finger, DHHC-type containing 13                         | CCDS44550.1     | chr11_19170802-19170802_A_G   | 148E>G  | Substitution | Nonsynonymous coding | 15% |
| MM20T | ZDHHC17 | zinc finger, DHHC-type containing 17                         | CCDS44946.1     | chr12_77240433-77240433_G_A   | 494C>Y  | Substitution | Nonsynonymous coding | 21% |
| MM20T | ZDHC8   | zinc finger, DHHC-type containing 8                          | CCDS13776.1     | chr22_20130515-20130515_G_    | NA      | Deletion     | Frameshift           | 29% |
| MM20T | ZFC3H1  | zinc finger, C3H1-type containing                            | CCDS41813.1     | chr12_72038781-72038781_T_    | NA      | Deletion     | Frameshift           | 11% |
| MM20T | ZFHX3   | zinc finger homeobox 3                                       | CCDS10908.1     | chr16_72992854-72992854_G_    | NA      | Deletion     | Frameshift           | 12% |
| MM20T | ZFHX3   | zinc finger homeobox 3                                       | CCDS10908.1     | chr16_72984661-72984661_C_T   | 975E>K  | Substitution | Nonsynonymous coding | 16% |
| MM20T | ZFP64   | ZFP64 zinc finger protein                                    | CCDS13440.1     | chr20_50781299-50781300_AA_   | NA      | Deletion     | Splice site acceptor | 19% |
| MM20T | ZHX3    | zinc fingers and homeoboxes 3                                | CCDS13315.1     | chr20_39833439-39833439_C_T   | 40D>N   | Substitution | Nonsynonymous coding | 24% |
| MM20T | ZIC3    | Zic family member 3                                          | CCDS14663.1     | chrX_136649761-136649761_G_A  | 304R>Q  | Substitution | Nonsynonymous coding | 26% |
| MM20T | ZMAT5   | zinc finger, matrin-type 5                                   | CCDS13868.1     | chr22_30127346-30127346_AG    | NA      | Insertion    | Splice site acceptor | 13% |
| MM20T | ZMYM2   | zinc finger, MYM-type 2                                      | CCDS45016.1     | chr13_20638677-20638677_A_    | NA      | Deletion     | Frameshift           | 24% |
| MM20T | ZMYM6   | zinc finger, MYM-type 6                                      | ENST00000373337 | chr1_35450861-35450861_A_G    | 16F>L   | Substitution | Nonsynonymous coding | 16% |
| MM20T | ZNF106  | zinc finger protein 106                                      | CCDS32208.1     | chr15_42742957-42742957_A_    | NA      | Deletion     | Frameshift           | 19% |
| MM20T | ZNF202  | zinc finger protein 202                                      | CCDS8443.1      | chr11_123601269-123601269_G_A | 110R>W  | Substitution | Nonsynonymous coding | 11% |
| MM20T | ZNF219  | zinc finger protein 219                                      | CCDS9568.1      | chr14_21560191-21560191_C_T   | 422R>H  | Substitution | Nonsynonymous coding | 11% |
| MM20T | ZNF227  | zinc finger protein 227                                      | CCDS12636.1     | chr19_44738947-44738947_C_T   | 122Q>X  | Substitution | Nonsense             | 17% |
| MM20T | ZNF300  | zinc finger protein 300                                      | NM_052860       | chr5_150276521-150276521_G_T  | 94L>I   | Substitution | Nonsynonymous coding | 23% |
| MM20T | ZNF335  | zinc finger protein 335                                      | CCDS13389.1     | chr20_44580788-44580788_G_A   | 1063R>W | Substitution | Nonsynonymous coding | 23% |
| MM20T | ZNF365  | zinc finger protein 365                                      | CCDS31209.1     | chr10_64159513-64159513_A_    | NA      | Deletion     | Frameshift           | 14% |

|       |           |                                                                                      |              |                              |         |              |                      |     |
|-------|-----------|--------------------------------------------------------------------------------------|--------------|------------------------------|---------|--------------|----------------------|-----|
| MM20T | ZNF398    | zinc finger protein 398                                                              | CCDS5894.1   | chr7_148876747-148876747_G_  | NA      | Deletion     | Frameshift           | 24% |
| MM20T | ZNF43     | zinc finger protein 43                                                               | CCDS12413.2  | chr19_22002026-22002026_A_   | NA      | Deletion     | Splice site acceptor | 29% |
| MM20T | ZNF45     | zinc finger protein 45                                                               | CCDS12632.1  | chr19_44418266-44418266_T_C  | 441E>G  | Substitution | Nonsynonymous coding | 35% |
| MM20T | ZNF513    | zinc finger protein 513                                                              | CCDS1751.1   | chr2_27601448-27601448_C_T   | 229A>T  | Substitution | Nonsynonymous coding | 33% |
| MM20T | ZNF749    | zinc finger protein 749                                                              | CCDS33132.2  | chr19_57956557-57956557_T_C  | 681S>P  | Substitution | Nonsynonymous coding | 18% |
| MM20T | ZNF829    | zinc finger protein 829                                                              | NM_001037232 | chr19_37406063-37406063_G_T  | 3H>N    | Substitution | Nonsynonymous coding | 22% |
| MM20T | ZNF831    | zinc finger protein 831                                                              | CCDS42894.1  | chr20_57766220-57766220__C   | NA      | Insertion    | Frameshift           | 11% |
| MM20T | ZNF836    | zinc finger protein 836                                                              | CCDS46162.1  | chr19_52658538-52658538_G_A  | 800H>Y  | Substitution | Nonsynonymous coding | 11% |
| MM21T | AHCYL2    | adenosylhomocysteinase-like 2                                                        | CCDS5812.1   | chr7_129053527-129053527_G_A | 487V>M  | Substitution | Nonsynonymous coding | 37% |
| MM21T | ATP2B4    | ATPase, Ca++ transporting, plasma membrane 4                                         | CCDS1440.1   | chr1_203677017-203677017_C_T | 448R>W  | Substitution | Nonsynonymous coding | 70% |
| MM21T | BDP1      | B double prime 1, subunit of RNA polymerase III transcription initiation factor IIIB | CCDS43328.1  | chr5_70837409-70837409_C_T   | 2051P>S | Substitution | Nonsynonymous coding | 63% |
| MM21T | C8orf47   | chromosome 8 open reading frame 47                                                   | CCDS34929.1  | chr8_99101884-99101884_G_T   | 213E>D  | Substitution | Nonsynonymous coding | 30% |
| MM21T | CAMTA1    | calmodulin binding transcription activator 1                                         | CCDS30576.1  | chr1_7731047-7731047_C_A     | 910S>X  | Substitution | Nonsense             | 27% |
| MM21T | CDC20B    | cell division cycle 20B                                                              | CCDS3966.1   | chr5_54410144-54410144_G_T   | 484H>N  | Substitution | Nonsynonymous coding | 52% |
| MM21T | CEP68     | centrosomal protein 68kDa                                                            | CCDS1880.2   | chr2_65298798-65298798_G_A   | 190A>T  | Substitution | Nonsynonymous coding | 42% |
| MM21T | CEP78     | centrosomal protein 78kDa                                                            | CCDS47984.1  | chr9_80869798-80869798_C_T   | 434S>F  | Substitution | Nonsynonymous coding | 46% |
| MM21T | CSMD2     | CUB and Sushi multiple domains 2                                                     | CCDS380.1    | chr1_34174742-34174742_C_T   | 1135G>R | Substitution | Nonsynonymous coding | 59% |
| MM21T | CTNNB1    | catenin (cadherin-associated protein), beta 1, 88kDa                                 | CCDS2694.1   | chr3_41266097-41266097_G_T   | 32D>Y   | Substitution | Nonsynonymous coding | 43% |
| MM21T | DDB1      | damage-specific DNA binding protein 1, 127kDa                                        | CCDS31576.1  | chr11_61091609-61091609_G_T  | 255Q>K  | Substitution | Nonsynonymous coding | 52% |
| MM21T | DGKI      | diacylglycerol kinase, iota                                                          | CCDS5845.1   | chr7_137263051-137263051_T_G | 555N>H  | Substitution | Nonsynonymous coding | 49% |
| MM21T | EFEMP2    | EGF containing fibulin-like extracellular matrix protein 2                           | CCDS8116.1   | chr11_65637450-65637450_G_T  | NA      | Substitution | Splice site acceptor | 43% |
| MM21T | FSTL5     | folliculin-like 5                                                                    | CCDS3802.1   | chr4_162380470-162380470_G_C | 537A>G  | Substitution | Nonsynonymous coding | 77% |
| MM21T | GAA       | glucosidase, alpha; acid                                                             | CCDS32760.1  | chr17_78082575-78082575_C_T  | 425P>L  | Substitution | Nonsynonymous coding | 45% |
| MM21T | IGF2R     | insulin-like growth factor 2 receptor                                                | CCDS5273.1   | chr6_160448246-160448246_C_T | 226R>W  | Substitution | Nonsynonymous coding | 51% |
| MM21T | KIAA1211L | Uncharacterized protein                                                              | CCDS42720.1  | chr2_99438635-99438635_G_T   | 701Q>K  | Substitution | Nonsynonymous coding | 43% |
| MM21T | MUC20     | mucin 20, cell surface associated                                                    | NM_152673    | chr3_195453336-195453336_C_T | 450T>M  | Substitution | Nonsynonymous coding | 23% |
| MM21T | NCOA6     | nuclear receptor coactivator 6                                                       | CCDS13241.1  | chr20_33330284-33330284_G_A  | 1259P>L | Substitution | Nonsynonymous coding | 41% |
| MM21T | NEIL3     | nei endonuclease VIII-like 3 (E. coli)                                               | CCDS3828.1   | chr4_178274693-178274693_T_C | 424V>A  | Substitution | Nonsynonymous coding | 35% |
| MM21T | NHLH1     | nescient helix loop helix 1                                                          | CCDS1204.1   | chr1_160340684-160340684_C_T | 55R>W   | Substitution | Nonsynonymous coding | 16% |
| MM21T | NODAL     | nodal growth differentiation factor                                                  | CCDS7304.1   | chr10_72192820-72192820_G_T  | 306H>N  | Substitution | Nonsynonymous coding | 48% |
| MM21T | PCDHGA2   | protocadherin gamma subfamily A, 2                                                   | CCDS4261.1   | chr5_140856560-140856560_C_A | 293Q>K  | Substitution | Nonsynonymous coding | 43% |
| MM21T | PITPNM1   | phosphatidylinositol transfer protein, membrane-associated 1                         | CCDS31620.1  | chr11_67261762-67261762_G_A  | 938R>C  | Substitution | Nonsynonymous coding | 36% |

|       |          |                                                                |                 |                              |         |              |                      |     |
|-------|----------|----------------------------------------------------------------|-----------------|------------------------------|---------|--------------|----------------------|-----|
| MM21T | PKP1     | plakophilin 1 (ectodermal dysplasia/skin fragility syndrome)   | CCDS30966.1     | chr1_201282516-201282516_C_A | 177Q>K  | Substitution | Nonsynonymous coding | 26% |
| MM21T | PROSER1  | proline and serine rich 1                                      | CCDS9368.2      | chr13_39587053-39587053_C_T  | 779G>E  | Substitution | Nonsynonymous coding | 44% |
| MM21T | PTEN     | phosphatase and tensin homolog                                 | NM_000314       | chr10_89711980-89711980_T_   | NA      | Deletion     | Frameshift           | 43% |
| MM21T | PTEN     | phosphatase and tensin homolog                                 | NM_000314       | chr10_89720671-89720671_G_A  | 274W>X  | Substitution | Nonsense             | 29% |
| MM21T | PTPN14   | protein tyrosine phosphatase, non-receptor type 14             | CCDS1514.1      | chr1_214557885-214557885_G_T | 438S>X  | Substitution | Nonsense             | 19% |
| MM21T | RHOT2    | ras homolog family member T2                                   | CCDS10417.1     | chr16_720970-720970_G_A      | 240G>S  | Substitution | Nonsynonymous coding | 55% |
| MM21T | SARDH    | sarcosine dehydrogenase                                        | CCDS6978.1      | chr9_136559377-136559377_T_C | NA      | Substitution | Splice site donor    | 46% |
| MM21T | SMPX     | small muscle protein, X-linked                                 | CCDS14200.1     | chrX_21755742-21755742_T_C   | 69N>S   | Substitution | Nonsynonymous coding | 49% |
| MM21T | SNRNP40  | small nuclear ribonucleoprotein 40kDa (U5)                     | CCDS340.1       | chr1_31766093-31766093_C_A   | 82A>S   | Substitution | Nonsynonymous coding | 47% |
| MM21T | SPOP     | speckle-type POZ protein                                       | CCDS11551.1     | chr17_47699372-47699372_C_T  | 46E>K   | Substitution | Nonsynonymous coding | 93% |
| MM21T | SPTB     | spectrin, beta, erythrocytic                                   | CCDS32099.1     | chr14_65241976-65241976_C_T  | 1570R>Q | Substitution | Nonsynonymous coding | 51% |
| MM21T | SRSF11   | serine/arginine-rich splicing factor 11                        | CCDS647.1       | chr1_70687423-70687423_T_G   | 35I>S   | Substitution | Nonsynonymous coding | 35% |
| MM21T | SUN1     | Sad1 and UNC84 domain containing 1                             | ENST00000456758 | chr7_856277-856277_C_T       | 41R>C   | Substitution | Nonsynonymous coding | 78% |
| MM21T | SYT15    | synaptotagmin XV                                               | ENST00000374323 | chr10_46970590-46970590_G_A  | 75P>S   | Substitution | Nonsynonymous coding | 19% |
| MM21T | TAP2     | transporter 2, ATP-binding cassette, sub-family B (MDR/TAP)    | CCDS4755.1      | chr6_32800487-32800487_G_A   | 354R>C  | Substitution | Nonsynonymous coding | 46% |
| MM21T | TMEM251  | transmembrane protein 251                                      | CCDS45158.1     | chr14_93652907-93652907_C_G  | 134T>R  | Substitution | Nonsynonymous coding | 34% |
| MM21T | TNP2     | transition protein 2 (during histone to protamine replacement) | CCDS45410.1     | chr16_11362969-11362969_G_T  | 51Q>K   | Substitution | Nonsynonymous coding | 46% |
| MM21T | TPRG1L   | tumor protein p63 regulated 1-like                             | CCDS47.1        | chr1_3545004-3545004_C_T     | 219A>V  | Substitution | Nonsynonymous coding | 55% |
| MM21T | TRRAP    | transformation/transcription domain-associated protein         | CCDS5659.1      | chr7_98513427-98513427_C_T   | 761R>W  | Substitution | Nonsynonymous coding | 40% |
| MM21T | TXNDC9   | thioredoxin domain containing 9                                | CCDS2044.1      | chr2_99936266-99936266_A_    | NA      | Deletion     | Splice site acceptor | 21% |
| MM21T | ZNF182   | zinc finger protein 182                                        | CCDS35236.1     | chrX_47836837-47836837_G_A   | 217R>X  | Substitution | Nonsense             | 41% |
| MM21T | ZNF407   | zinc finger protein 407                                        | CCDS45885.1     | chr18_72775720-72775720_G_A  | 2015G>S | Substitution | Nonsynonymous coding | 42% |
| MM21T | ZNF711   | zinc finger protein 711                                        | CCDS35344.1     | chrX_84526594-84526594_G_T   | 682K>N  | Substitution | Nonsynonymous coding | 46% |
| MM22T | ARID1A   | AT rich interactive domain 1A (SWI-like)                       | CCDS285.1       | chr1_27059229-27059229_G_    | NA      | Deletion     | Frameshift           | 22% |
| MM22T | ARID1A   | AT rich interactive domain 1A (SWI-like)                       | CCDS285.1       | chr1_27056307-27056307_C_T   | 435Q>X  | Substitution | Nonsense             | 39% |
| MM22T | BCOR     | BCL6 corepressor                                               | CCDS48093.1     | chrX_39913565-39913565_C_A   | 1588G>V | Substitution | Nonsynonymous coding | 27% |
| MM22T | C16orf91 | chromosome 16 open reading frame 91                            | CCDS32360.1     | chr16_1478505-1478505_G_A    | 49A>V   | Substitution | Nonsynonymous coding | 32% |
| MM22T | CCDC178  | coiled-coil domain containing 178                              | CCDS42424.1     | chr18_30803107-30803107_T    | NA      | Insertion    | Frameshift           | 18% |
| MM22T | CHD4     | chromodomain helicase DNA binding protein 4                    | CCDS8552.1      | chr12_6702659-6702659_G_A    | 813R>C  | Substitution | Nonsynonymous coding | 36% |
| MM22T | CREBBP   | CREB binding protein                                           | CCDS10509.1     | chr16_3831239-3831239_C_A    | 548E>X  | Substitution | Nonsense             | 32% |
| MM22T | CYP4A11  | cytochrome P450, family 4, subfamily A, polypeptide 11         | CCDS543.1       | chr1_47395822-47395822_G_A   | 509L>F  | Substitution | Nonsynonymous coding | 17% |
| MM22T | DIAPH2   | diaphanous homolog 2 (Drosophila)                              | CCDS14467.1     | chrX_96167528-96167528_C_T   | 237L>F  | Substitution | Nonsynonymous coding | 11% |

|       |          |                                                                         |                 |                               |         |              |                      |     |
|-------|----------|-------------------------------------------------------------------------|-----------------|-------------------------------|---------|--------------|----------------------|-----|
| MM22T | DYNC1H1  | dynein, cytoplasmic 1, heavy chain 1                                    | CCDS9966.1      | chr14_102461425-102461425_A_T | 1146I>F | Substitution | Nonsynonymous coding | 31% |
| MM22T | F9       | coagulation factor IX                                                   | CCDS14666.1     | chrX_138619223-138619223_A_G  | 48N>S   | Substitution | Nonsynonymous coding | 37% |
| MM22T | FOXO3    | forkhead box O3                                                         | CCDS5068.1      | chr6_108985403-108985403_C_A  | 456P>Q  | Substitution | Nonsynonymous coding | 20% |
| MM22T | FSIP2    | fibrous sheath interacting protein 2                                    | ENST00000424728 | chr2_186655233-186655233_G_A  | 1124V>I | Substitution | Nonsynonymous coding | 33% |
| MM22T | GCOM1    | GRINL1A complex locus 1                                                 | CCDS32252.1     | chr15_58001174-58001174_A_C   | 126T>P  | Substitution | Nonsynonymous coding | 18% |
| MM22T | GIT1     | G protein-coupled receptor kinase interacting ArfGAP 1                  | CCDS42290.1     | chr17_27909065-27909065_G_A   | 168T>I  | Substitution | Nonsynonymous coding | 11% |
| MM22T | GRIN2D   | glutamate receptor, ionotropic, N-methyl D-aspartate 2D                 | CCDS12719.1     | chr19_48922931-48922931_C_T   | 651R>W  | Substitution | Nonsynonymous coding | 47% |
| MM22T | HTR2A    | 5-hydroxytryptamine (serotonin) receptor 2A, G protein-coupled          | CCDS9405.1      | chr13_47466584-47466584_C_A   | 185R>L  | Substitution | Nonsynonymous coding | 49% |
| MM22T | HUS1B    | HUS1 checkpoint homolog b (S. pombe)                                    | CCDS4470.1      | chr6_656680-656680_G_A        | 89R>W   | Substitution | Nonsynonymous coding | 43% |
| MM22T | KIAA1109 | Uncharacterized protein                                                 | CCDS43267.1     | chr4_123160940-123160940_C_T  | 1368T>I | Substitution | Nonsynonymous coding | 36% |
| MM22T | LIN9     | lin-9 homolog (C. elegans)                                              | CCDS1553.1      | chr1_226496812-226496812_T_C  | 26E>G   | Substitution | Nonsynonymous coding | 29% |
| MM22T | LRRC7    | leucine rich repeat containing 7                                        | CCDS645.1       | chr1_70504559-70504559_C_T    | 980R>X  | Substitution | Nonsense             | 36% |
| MM22T | LTBP2    | latent transforming growth factor beta binding protein 2                | CCDS9831.1      | chr14_75019624-75019624_C_T   | 388G>E  | Substitution | Nonsynonymous coding | 37% |
| MM22T | MBTPS1   | membrane-bound transcription factor peptidase, site 1                   | CCDS10941.1     | chr16_84115500-84115500_G_A   | 434R>C  | Substitution | Nonsynonymous coding | 39% |
| MM22T | MCCC2    | methylcrotonoyl-CoA carboxylase 2 (beta)                                | CCDS34184.1     | chr5_70922542-70922542_C_T    | 234R>C  | Substitution | Nonsynonymous coding | 22% |
| MM22T | MED13    | mediator complex subunit 13                                             | CCDS42366.1     | chr17_60059760-60059760_G_A   | 1202P>S | Substitution | Nonsynonymous coding | 40% |
| MM22T | MKL1     | megakaryoblastic leukemia (translocation) 1                             | CCDS14003.1     | chr22_40814829-40814829_G_A   | 538T>M  | Substitution | Nonsynonymous coding | 17% |
| MM22T | MLL3     | myeloid/lymphoid or mixed-lineage leukemia 3                            | CCDS5931.1      | chr7_151879120-151879120_G_A  | 1942T>I | Substitution | Nonsynonymous coding | 37% |
| MM22T | MS4A4E   | membrane-spanning 4-domains, subfamily A, member 4E                     | ENST00000398984 | chr11_59980793-59980793_C_A   | 110K>N  | Substitution | Nonsynonymous coding | 31% |
| MM22T | MYO1F    | myosin 1F                                                               | CCDS42494.1     | chr19_8615138-8615138_G_A     | 336S>F  | Substitution | Nonsynonymous coding | 38% |
| MM22T | NOL11    | nucleolar protein 11                                                    | CCDS11671.1     | chr17_65717513-65717513_G     | NA      | Insertion    | Frameshift           | 33% |
| MM22T | NVL      | nuclear VCP-like                                                        | CCDS1541.1      | chr1_224505480-224505480_C_T  | 67S>N   | Substitution | Nonsynonymous coding | 21% |
| MM22T | OR8D1    | olfactory receptor, family 8, subfamily D, member 1                     | CCDS31706.1     | chr11_124179803-124179803_G_C | 287P>R  | Substitution | Nonsynonymous coding | 36% |
| MM22T | PAPPA    | pregnancy-associated plasma protein A, pappalysin 1                     | CCDS6813.1      | chr9_119124898-119124898_C_T  | 1459R>W | Substitution | Nonsynonymous coding | 36% |
| MM22T | PIGR     | polymeric immunoglobulin receptor                                       | CCDS1474.1      | chr1_207109064-207109064_T_A  | 382K>M  | Substitution | Nonsynonymous coding | 20% |
| MM22T | PIK3CA   | phosphatidylinositol-4,5-bisphosphate 3-kinase, catalytic subunit alpha | CCDS43171.1     | chr3_178936091-178936091_G_A  | 545E>K  | Substitution | Nonsynonymous coding | 36% |
| MM22T | PPEF1    | protein phosphatase, EF-hand calcium binding domain 1                   | CCDS14188.1     | chrX_18748349-18748349_C_T    | 33R>X   | Substitution | Nonsense             | 42% |
| MM22T | PTEN     | phosphatase and tensin homolog                                          | NM_000314       | chr10_89685286-89685286_C_T   | 61H>Y   | Substitution | Nonsynonymous coding | 32% |
| MM22T | PTEN     | phosphatase and tensin homolog                                          | NM_000314       | chr10_89717708-89717708_C_T   | 245Q>X  | Substitution | Nonsense             | 28% |
| MM22T | PTEN     | phosphatase and tensin homolog                                          | NM_000314       | chr10_89717715-89717715_T_A   | 247L>X  | Substitution | Nonsense             | 54% |
| MM22T | PTPN21   | protein tyrosine phosphatase, non-receptor type 21                      | CCDS9884.1      | chr14_88945856-88945856_A_G   | 640V>A  | Substitution | Nonsynonymous coding | 13% |
| MM22T | PUF60    | poly-U binding splicing factor 60KDa                                    | CCDS47934.1     | chr8_144900664-144900664_C_T  | 130R>H  | Substitution | Nonsynonymous coding | 35% |



|       |         |                                                                         |                 |                              |        |              |                      |     |
|-------|---------|-------------------------------------------------------------------------|-----------------|------------------------------|--------|--------------|----------------------|-----|
| MM22T | RD3     | retinal degeneration 3                                                  | CCDS1498.1      | chr1_211652449-211652449_C_T | 173V>M | Substitution | Nonsynonymous coding | 25% |
| MM22T | SNF8    | SNF8, ESCRT-II complex subunit, homolog (S. cerevisiae)                 | CCDS11541.1     | chr17_47009016-47009016_G_A  | 210R>W | Substitution | Nonsynonymous coding | 38% |
| MM22T | SOGA1   | suppressor of glucose, autophagy associated 1                           | CCDS46598.1     | chr20_35444452-35444452_C_T  | 227V>M | Substitution | Nonsynonymous coding | 40% |
| MM22T | SPRED1  | sprouty-related, EVH1 domain containing 1                               | CCDS32193.1     | chr15_38591683-38591683_C_A  | 48P>T  | Substitution | Nonsynonymous coding | 40% |
| MM22T | TBC1D16 | TBC1 domain family, member 16                                           | CCDS11766.1     | chr17_77926477-77926477_C_A  | 307R>L | Substitution | Nonsynonymous coding | 38% |
| MM22T | TMCO5A  | transmembrane and coiled-coil domains 5A                                | CCDS10046.1     | chr15_38229073-38229073_C_T  | 56R>W  | Substitution | Nonsynonymous coding | 49% |
| MM22T | TPTE    | transmembrane phosphatase with tensin homology                          | CCDS13560.2     | chr21_10910399-10910399_C_T  | 453V>I | Substitution | Nonsynonymous coding | 19% |
| MM22T | TRAK2   | trafficking protein, kinesin binding 2                                  | CCDS2347.1      | chr2_202272201-202272201_G_A | 71Q>X  | Substitution | Nonsense             | 23% |
| MM22T | TROVE2  | TROVE domain family, member 2                                           | CCDS1379.1      | chr1_193045771-193045771_A_T | 314L>F | Substitution | Nonsynonymous coding | 25% |
| MM22T | UPB1    | ureidopropionase, beta                                                  | CCDS13827.1     | chr22_24917989-24917989_A_   | NA     | Deletion     | Frameshift           | 31% |
| MM22T | ZCRB1   | zinc finger CCHC-type and RNA binding motif 1                           | CCDS8740.1      | chr12_42707698-42707698_C_T  | 142A>T | Substitution | Nonsynonymous coding | 32% |
| MM22T | ZNF852  | zinc finger protein 852                                                 | ENST00000436261 | chr3_44544150-44544150_G_A   | 9A>V   | Substitution | Nonsynonymous coding | 23% |
| MM07T | ATP13A3 | ATPase type 13A3                                                        | CCDS43187.1     | chr3_194177880-194177880_C_A | 168C>F | Substitution | Nonsynonymous coding | 11% |
| MM07T | PIK3CA  | phosphatidylinositol-4,5-bisphosphate 3-kinase, catalytic subunit alpha | CCDS43171.1     | chr3_178916890-178916890_C_T | 93R>W  | Substitution | Nonsynonymous coding | 9%  |
| MM07T | RFPL3   | ret finger protein-like 3                                               | CCDS43011.1     | chr22_32756703-32756703_C_T  | 280R>C | Substitution | Nonsynonymous coding | 21% |
| MM07T | TP53    | tumor protein p53                                                       | CCDS11118.1     | chr17_7578406-7578406_C_T    | 175R>H | Substitution | Nonsynonymous coding | 6%  |

---
